# Supplementary material for: Inter-tissue coexpression network analysis reveals DPP4 as an important gene in heart to blood communication
Source: PubMed Central journal article supplement (PMC4746932; doi:10.1186/s13073-016-0268-1), 2016-02-09
Supplement: 13073_2016_268_MOESM1_ESM.pdf [file 13073_2016_268_MOESM1_ESM.pdf]

| tissue pair                                     | sample size |
|-------------------------------------------------|-------------|
| Lung.Thyroid                                    | 84          |
| Lung.Artery_Tibial                              | 83          |
| Lung.Adipose_Subcutaneous                       | 68          |
| Lung.Muscle_Skeletal                            | 100         |
| Lung.Heart_Left_Ventricle                       | 66          |
| Lung.Whole_Blood                                | 104         |
| Lung.Nerve_Tibial                               | 70          |
| Lung.Skin_Sun_Exposed_Lower_leg                 | 71          |
| Thyroid.Artery_Tibial                           | 73          |
| Thyroid.Adipose_Subcutaneous                    | 65          |
| Thyroid.Muscle_Skeletal                         | 88          |
| Thyroid.Heart_Left_Ventricle                    | 58          |
| Thyroid.Whole_Blood                             | 90          |
| Thyroid.Nerve_Tibial                            | 56          |
| Thyroid.Skin_Sun_Exposed_Lower_leg              | 60          |
| Artery_Tibial.Adipose_Subcutaneous              | 68          |
| Artery_Tibial.Muscle_Skeletal                   | 101         |
| Artery_Tibial.Heart_Left_Ventricle              | 62          |
| Artery_Tibial.Whole_Blood                       | 100         |
| Artery_Tibial.Nerve_Tibial                      | 68          |
| Artery_Tibial.Skin_Sun_Exposed_Lower_leg        | 66          |
| Adipose_Subcutaneous.Muscle_Skeletal            | 85          |
| Adipose_Subcutaneous.Heart_Left_Ventricle       | 48          |
| Adipose_Subcutaneous.Whole_Blood                | 83          |
| Adipose_Subcutaneous.Nerve_Tibial               | 53          |
| Adipose_Subcutaneous.Skin_Sun_Exposed_Lower     | 60          |
| Muscle_Skeletal.Heart_Left_Ventricle            | 69          |
| Muscle_Skeletal.Whole_Blood                     | 122         |
| Muscle_Skeletal.Nerve_Tibial                    | 77          |
| Muscle_Skeletal.Skin_Sun_Exposed_Lower_leg      | 85          |
| Heart_Left_Ventricle.Whole_Blood                | 74          |
| Heart_Left_Ventricle.Nerve_Tibial               | 48          |
| Heart_Left_Ventricle.Skin_Sun_Exposed_Lower_leg | 51          |
| Whole_Blood.Nerve_Tibial                        | 79          |
| Whole_Blood.Skin_Sun_Exposed_Lower_leg          | 84          |
| Nerve_Tibial.Skin_Sun_Exposed_Lower_leg         | 56          |
