# Supplementary material for: Inter-tissue coexpression network analysis reveals DPP4 as an important gene in heart to blood communication
Source: PubMed Central journal article supplement (PMC4746932; doi:10.1186/s13073-016-0268-1), 2016-02-09
Supplement: 13073_2016_268_MOESM4_ESM.pdf [file 13073_2016_268_MOESM4_ESM.pdf]

| Tissue                                          | # of modules |
|-------------------------------------------------|--------------|
| Adipose_Subcutaneous.Heart_Left_Ventricle       | 609          |
| Adipose_Subcutaneous.Muscle_Skeletal            | 507          |
| Adipose_Subcutaneous.Nerve_Tibial               | 745          |
| Adipose_Subcutaneous.Skin_Sun_Exposed_Lower_leg | 756          |
| Adipose_Subcutaneous.Whole_Blood                | 418          |
| Artery_Tibial.Adipose_Subcutaneous              | 724          |
| Artery_Tibial.Heart_Left_Ventricle              | 1034         |
| Artery_Tibial.Muscle_Skeletal                   | 685          |
| Artery_Tibial.Nerve_Tibial                      | 1032         |
| Artery_Tibial.Skin_Sun_Exposed_Lower_leg        | 719          |
| Artery_Tibial.Whole_Blood                       | 380          |
| Heart_Left_Ventricle.Nerve_Tibial               | 1126         |
| Heart_Left_Ventricle.Skin_Sun_Exposed_Lower_leg | 576          |
| Heart_Left_Ventricle.Whole_Blood                | 304          |
| Lung.Adipose_Subcutaneous                       | 437          |
| Lung.Artery_Tibial                              | 513          |
| Lung.Heart_Left_Ventricle                       | 504          |
| Lung.Muscle_Skeletal                            | 208          |
| Lung.Nerve_Tibial                               | 522          |
| Lung.Skin_Sun_Exposed_Lower_leg                 | 9            |
| Lung.Thyroid                                    | 445          |
| Lung.Whole_Blood                                | 105          |
| Muscle_Skeletal.Heart_Left_Ventricle            | 512          |
| Muscle_Skeletal.Nerve_Tibial                    | 541          |
| Muscle_Skeletal.Skin_Sun_Exposed_Lower_leg      | 344          |
| Muscle_Skeletal.Whole_Blood                     | 164          |
| Nerve_Tibial.Skin_Sun_Exposed_Lower_leg         | 514          |
| Thyroid.Adipose_Subcutaneous                    | 957          |
| Thyroid.Artery_Tibial                           | 1513         |
| Thyroid.Heart_Left_Ventricle                    | 1050         |
| Thyroid.Muscle_Skeletal                         | 635          |
| Thyroid.Nerve_Tibial                            | 908          |
| Thyroid.Skin_Sun_Exposed_Lower_leg              | 589          |
| Thyroid.Whole_Blood                             | 391          |
| Whole_Blood.Nerve_Tibial                        | 423          |
| Whole_Blood.Skin_Sun_Exposed_Lower_leg          | 248          |
| .                                               | 21147 total  |
