# Supplementary material for: Inter-tissue coexpression network analysis reveals DPP4 as an important gene in heart to blood communication
Source: PubMed Central journal article supplement (PMC4746932; doi:10.1186/s13073-016-0268-1), 2016-02-09
Supplement: 13073_2016_268_MOESM5_ESM.pdf [file 13073_2016_268_MOESM5_ESM.pdf]

STable4\_20PerPair

Tissue: Heart\_Left\_Ventricle=>Adipose\_Subcutaneous Type: asymmetric

SourceGene: CRABP1(ENSG00000166426.7)

TargetGeneSet: RP11 SRGAP2P2 CDC42SE1 PMVK PTPN7 MRPL33  
 SGOL2 PHLDB2 COX17 PSAPL1 C4orf3 NDUFC1 NDUFS4 COX7C FAM65B RPS6KA2  
 MRPS24 TP53TG1 SGK196 TMEM67 COX6C DEPTOR FAM27E2 CNTRL QSOX2 FBXW5  
 ZNF215 TBC1D10C TMEM106C DNAJC14 TMEM198B PARP4 ELF1  
 FLVCR2 NDUFB1 MOK NDUFB10 GABARAPL2 MAP1LC3B IL17C SCIMP  
 NLRP1 CBX1 UQCR11 S1PR4 PRR22 HSH2D FKBP8 C19orf54 SAMHD1  
 NCOA3 ZBP1 RP4 ATP5J HSF2BP TTC38

| GOBPID     | Pvalue   | OddsRatio | ExpCount    | Count       | Size | Term                                                         |
|------------|----------|-----------|-------------|-------------|------|--------------------------------------------------------------|
| GO:0022904 | 5.98E-10 |           | 34.25119617 | 0.305584389 | 8    | 96<br>respiratory electron transport chain                   |
| GO:0022900 | 8.59E-09 |           | 23.85797828 | 0.426544876 | 8    | 134<br>electron transport chain                              |
| GO:0045333 | 1.36E-08 |           | 22.42105263 | 0.452010242 | 8    | 142<br>cellular respiration                                  |
| GO:0015980 | 4.90E-06 |           | 9.932054216 | 0.977233409 | 8    | 307<br>energy derivation by oxidation of organic compounds   |
| GO:0006120 | 4.91E-06 |           | 42.77678571 | 0.114594146 | 4    | 36<br>"mitochondrial electron transport, NADH to ubiquinone" |

STable4\_20PerPair

GO:0006091 6.71E-06 8.119331742 1.362397066 9 428  
 generation of precursor metabolites and energy

GO:0042773 1.45E-05 31.80952381 0.149609024 4 47 ATP  
 synthesis coupled electron transport

GO:0042775 1.45E-05 31.80952381 0.149609024 4 47  
 mitochondrial ATP synthesis coupled electron transport

Tissue: Adipose\_Subcutaneous=>Heart\_Left\_Ventricle Type: asymmetric

SourceGene: CTD-2184D3.7(ENSG00000259709.1) Novel antisense

TargetGeneSet: RPL11 IPO9-AS1 RP11 RAB1A FAHD2B KANSL1L RPL37A  
 MME-AS1 RPL39P3 PDAP1 TAS2R5 RPL30 PTCH1 RPL35 TOR1B EIF5AL1 RPLP2  
 RPS25 ERH SLIRP SRP14 MAP2K5 WHAMM MYL12B RPL36 CDC37 EEF1B2P3  
 6-Sep

| GOBPID     | Pvalue   | OddsRatio | ExpCount    | Count       | Size | Term                                                               |
|------------|----------|-----------|-------------|-------------|------|--------------------------------------------------------------------|
| GO:0006414 | 1.09E-14 |           | 111.984375  | 0.152584596 | 9    | 105<br>translational elongation                                    |
| GO:0006415 | 3.44E-13 |           | 106.3725672 | 0.132239983 | 8    | 91<br>translational termination                                    |
| GO:0006612 | 3.48E-13 |           | 74.40625    | 0.222337554 | 9    | 153<br>protein targeting to membrane                               |
| GO:0006614 | 1.11E-12 |           | 90.93100714 | 0.152584596 | 8    | 105<br>SRP-dependent cotranslational protein targeting to membrane |

STable4\_20PerPair

|                                                                       |          |             |             |    |     |
|-----------------------------------------------------------------------|----------|-------------|-------------|----|-----|
| GO:0006613                                                            | 1.20E-12 | 89.99686028 | 0.154037783 | 8  | 106 |
| cotranslational protein targeting to membrane                         |          |             |             |    |     |
| GO:0045047                                                            | 1.20E-12 | 89.99686028 | 0.154037783 | 8  | 106 |
| protein targeting to ER                                               |          |             |             |    |     |
| GO:0072599                                                            | 1.20E-12 | 89.99686028 | 0.154037783 | 8  | 106 |
| establishment of protein localization to endoplasmic reticulum        |          |             |             |    |     |
| GO:0070972                                                            | 2.89E-12 | 80.11188811 | 0.171476022 | 8  | 118 |
| protein localization to endoplasmic reticulum                         |          |             |             |    |     |
| GO:0043624                                                            | 2.38E-11 | 60.62599469 | 0.222337554 | 8  | 153 |
| cellular protein complex disassembly                                  |          |             |             |    |     |
| GO:0043241                                                            | 3.08E-11 | 58.58461538 | 0.229603488 | 8  | 158 |
| protein complex disassembly                                           |          |             |             |    |     |
| GO:0034623                                                            | 6.69E-11 | 52.87859129 | 0.252854474 | 8  | 174 |
| cellular macromolecular complex disassembly                           |          |             |             |    |     |
| GO:0032984                                                            | 8.40E-11 | 51.31443995 | 0.260120407 | 8  | 179 |
| macromolecular complex disassembly                                    |          |             |             |    |     |
| GO:0000184                                                            | 2.27E-10 | 63.91964286 | 0.172929209 | 7  | 119 |
| "nuclear-transcribed mRNA catabolic process, nonsense-mediated decay" |          |             |             |    |     |
| GO:0072594                                                            | 2.39E-10 | 44.69073783 | 0.296450073 | 8  | 204 |
| establishment of protein localization to organelle                    |          |             |             |    |     |
| GO:0006605                                                            | 3.35E-10 | 27.36285266 | 0.688810463 | 10 | 474 |
| protein targeting                                                     |          |             |             |    |     |
| GO:0019080                                                            | 1.22E-09 | 49.60416667 | 0.219431181 | 7  | 151 |
| viral genome expression                                               |          |             |             |    |     |
| GO:0019083                                                            | 1.22E-09 | 49.60416667 | 0.219431181 | 7  | 151 |

STable4\_20PerPair

viral transcription

|                                                  |          |             |             |   |     |       |
|--------------------------------------------------|----------|-------------|-------------|---|-----|-------|
| GO:0006413                                       | 1.27E-09 | 49.25862069 | 0.220884368 | 7 | 152 |       |
| translational initiation                         |          |             |             |   |     |       |
| GO:0000956                                       | 2.68E-09 | 44.03703704 | 0.245588541 | 7 | 169 |       |
| nuclear-transcribed mRNA catabolic process       |          |             |             |   |     |       |
| GO:0071845                                       | 3.29E-09 | 31.55852843 | 0.412705003 | 8 | 284 |       |
| cellular component disassembly at cellular level |          |             |             |   |     |       |
| GO:0022411                                       | 3.67E-09 | 31.0989011  | 0.41851775  | 8 | 288 |       |
| cellular component disassembly                   |          |             |             |   |     |       |
| GO:0006402                                       | 3.84E-09 | 41.69298246 | 0.25866722  | 7 | 178 | mRNA  |
| catabolic process                                |          |             |             |   |     |       |
| GO:0006401                                       | 1.03E-08 | 35.93939394 | 0.297903259 | 7 | 205 | RNA   |
| catabolic process                                |          |             |             |   |     |       |
| GO:0019058                                       | 2.34E-08 | 31.70982143 | 0.335686112 | 7 | 231 |       |
| viral infectious cycle                           |          |             |             |   |     |       |
| GO:0022415                                       | 5.28E-08 | 28.01778656 | 0.377828524 | 7 | 260 |       |
| viral reproductive process                       |          |             |             |   |     |       |
| GO:0033365                                       | 1.74E-07 | 18.48138958 | 0.687357276 | 8 | 473 |       |
| protein localization to organelle                |          |             |             |   |     |       |
| GO:0016032                                       | 2.19E-06 | 15.75       | 0.65538717  | 7 | 451 | viral |
| reproduction                                     |          |             |             |   |     |       |

Tissue: Heart\_Left\_Ventricle=>Adipose\_Subcutaneous Type: asymmetric

STable4\_20PerPair

SourceGene: CTD-2290C23.1(ENSG00000224282.3)

|                |          |          |         |          |          |            |        |         |          |      |
|----------------|----------|----------|---------|----------|----------|------------|--------|---------|----------|------|
| TargetGeneSet: | MTND1P23 | RP11     | TNFRSF4 | KCNAB2   | C1QC     | C1QB       | ARID1A |         |          |      |
| C1orf38        | CSF3R    | C1orf162 | ADORA3  | RP4      | SRGAP2P2 | C1orf56    | SLAMF8 | PIGM    |          |      |
| CD84           | CEP350   | PTPRC    | BIRC6   | ITGB6    | PDCD1    | BRK1       | UBE2E2 |         |          |      |
| MFSD7          | SH3TC1   | BOD1L    | TXK     | PDGFRA   | BMP2K    | RPS3A      | FYB    | EMB     | SKP1     |      |
| DDX46          | CSF1R    | DOCK2    | ATF6B   | GPSM3    | CUTA     | FGD2       | WDR11  | RP3     | MPLKIP   |      |
| CCL24          | IFRD1    | TFEC     | TBXAS1  | PRSS1    | SLA      | SYK        | WDFY4  | RPS3AP5 | PNLIPRP2 |      |
| MS4A6A         | MS4A7    | FERMT3   | BAD     | RNASEH2C |          | BCRP1      | RHOD   | AIP     | SLCO2B1  |      |
| MYO7A          | ATM      | UBE4A    | KCNJ5   | CD4      | PTPN6    | CD163      | C3AR1  | ITPR2   | ALG10B   | MLL4 |
| NCKAP1L        | RBMS1P1  | SELPLG   | GIT2    | MED13L   | LACC1    | MYCBP2-AS1 | SLC7A7 | FANCM   |          |      |
| VTI1B          | SIVA1    | FMN1     | USP8    | STUB1    | MEFV     | SLC7A6     | ARRB2  | POLR2A  | TMEM106A |      |
| TMEM106A-AS1   |          | RHBDF2   | TNRC6C  | C19orf35 |          | CLEC4G     | CD209  | EIF3G   | GMIP     |      |
| TYROBP         | RASGRP4  | JOSD2    | LILRA1  | SIGLEC1  | ADAMTS1  | TRPM2      | MCM3AP | EP300   | C22orf32 |      |
| NFAM1          | WAS      | CACNA1F  | VSIG4   | BTK      | DDX26B   | MPP1       |        |         |          |      |

|        |        |           |          |       |      |      |
|--------|--------|-----------|----------|-------|------|------|
| GOBPID | Pvalue | OddsRatio | ExpCount | Count | Size | Term |
|--------|--------|-----------|----------|-------|------|------|

|                               |          |  |             |             |    |     |
|-------------------------------|----------|--|-------------|-------------|----|-----|
| GO:0002253                    | 1.53E-08 |  | 8.129535604 | 2.048370355 | 14 | 299 |
| activation of immune response |          |  |             |             |    |     |

|                       |          |  |             |             |    |     |
|-----------------------|----------|--|-------------|-------------|----|-----|
| GO:0046649            | 3.70E-08 |  | 6.441882638 | 2.966369109 | 16 | 433 |
| lymphocyte activation |          |  |             |             |    |     |

STable4\_20PerPair

|                                             |          |             |             |    |     |
|---------------------------------------------|----------|-------------|-------------|----|-----|
| GO:0051249                                  | 6.51E-08 | 7.883979328 | 1.938758563 | 13 | 283 |
| regulation of lymphocyte activation         |          |             |             |    |     |
| GO:0050864                                  | 7.76E-08 | 17.19584525 | 0.554909695 | 8  | 81  |
| regulation of B cell activation             |          |             |             |    |     |
| GO:0045577                                  | 7.90E-08 | 63.56382979 | 0.116462529 | 5  | 17  |
| regulation of B cell differentiation        |          |             |             |    |     |
| GO:0050865                                  | 8.49E-08 | 7.020275344 | 2.349802782 | 14 | 343 |
| regulation of cell activation               |          |             |             |    |     |
| GO:0050851                                  | 1.59E-07 | 12.48947368 | 0.842640648 | 9  | 123 |
| antigen receptor-mediated signaling pathway |          |             |             |    |     |

STable4\_20PerPair

GO:0050778 1.76E-07 6.589176471 2.493668258 14 364  
 positive regulation of immune response

GO:0045579 2.54E-07 120.8168421 0.061656633 4 9  
 positive regulation of B cell differentiation

GO:0042110 2.61E-07 6.938668491 2.185385094 13 319 T  
 cell activation

GO:0002694 2.80E-07 6.892630625 2.199086568 13 321  
 regulation of leukocyte activation

GO:0002429 3.10E-07 11.47419355 0.911148017 9 133  
 immune response-activating cell surface receptor signaling pathway

STable4\_20PerPair

|                                                                    |          |             |             |    |     |   |
|--------------------------------------------------------------------|----------|-------------|-------------|----|-----|---|
| GO:0002768                                                         | 6.09E-07 | 10.53111111 | 0.986506124 | 9  | 144 |   |
| immune response-regulating cell surface receptor signaling pathway |          |             |             |    |     |   |
| GO:0002521                                                         | 1.02E-06 | 6.6882283   | 2.068922566 | 12 | 302 |   |
| leukocyte differentiation                                          |          |             |             |    |     |   |
| GO:0030098                                                         | 1.32E-06 | 8.199930499 | 1.397550343 | 10 | 204 |   |
| lymphocyte differentiation                                         |          |             |             |    |     |   |
| GO:0050853                                                         | 1.42E-06 | 31.75531915 | 0.198671372 | 5  | 29  | B |
| cell receptor signaling pathway                                    |          |             |             |    |     |   |



STable4\_20PerPair

GO:0050871 1.76E-06 19.22580645 0.369939797 6 54  
 positive regulation of B cell activation

GO:0002757 4.69E-06 7.054681648 1.609923189 10 235  
 immune response-activating signal transduction

GO:0050900 5.87E-06 6.868524734 1.651027611 10 241  
 leukocyte migration

GO:0001817 6.09E-06 5.566928351 2.459414573 12 359  
 regulation of cytokine production

GO:0030183 6.89E-06 14.86992716 0.465850114 6 68 B  
 cell differentiation

STable4\_20PerPair

|                                              |          |             |             |    |     |   |
|----------------------------------------------|----------|-------------|-------------|----|-----|---|
| GO:0002764                                   | 7.55E-06 | 6.663204608 | 1.698982769 | 10 | 248 |   |
| immune response-regulating signaling pathway |          |             |             |    |     |   |
| GO:0042113                                   | 9.97E-06 | 8.613565745 | 1.048162757 | 8  | 153 | B |
| cell activation                              |          |             |             |    |     |   |
| GO:0002252                                   | 1.27E-05 | 5.155080214 | 2.644384472 | 12 | 386 |   |
| immune effector process                      |          |             |             |    |     |   |
| GO:0006954                                   | 1.56E-05 | 4.680659864 | 3.165040482 | 13 | 462 |   |
| inflammatory response                        |          |             |             |    |     |   |
| GO:0030097                                   | 1.59E-05 | 4.669922481 | 3.171891219 | 13 | 463 |   |
| hemopoiesis                                  |          |             |             |    |     |   |

STable4\_20PerPair

GO:0001816 1.59E-05 5.03070136 2.706041104 12 395  
 cytokine production

GO:0042098 1.62E-05 9.761750881 0.808386963 7 118 T  
 cell proliferation

GO:0051251 1.64E-05 6.866990291 1.472908449 9 215  
 positive regulation of lymphocyte activation

Tissue: Heart\_Left\_Ventricle=>Adipose\_Subcutaneous Type: cluster

SourceGene: CTD-2290C23.1(ENSG00000224282.3)

STable4\_20PerPair

|                |          |          |         |          |          |            |        |          |
|----------------|----------|----------|---------|----------|----------|------------|--------|----------|
| TargetGeneSet: | MTND1P23 | RP11     | TNFRSF4 | KCNAB2   | C1QC     | C1QB       | ARID1A |          |
| C1orf38        | CSF3R    | C1orf162 | ADORA3  | RP4      | SRGAP2P2 | C1orf56    | SLAMF8 | PIGM     |
| CD84           | CEP350   | PTPRC    | BIRC6   | ITGB6    | PDCD1    | BRK1       | UBE2E2 | STAB1    |
| MFSD7          | SH3TC1   | BOD1L    | TXK     | PDGFRA   | BMP2K    | RPS3A      | FYB    | EMB      |
| DDX46          | CSF1R    | DOCK2    | ATF6B   | GPSM3    | CUTA     | FGD2       | WDR11  | RP3      |
| CCL24          | IFRD1    | TFEC     | TBXAS1  | PRSS1    | SLA      | SYK        | WDFY4  | RPS3AP5  |
| MS4A6A         | MS4A7    | FERMT3   | BAD     | RNASEH2C |          | BCRP1      | RHOD   | AIP      |
| MYO7A          | ATM      | UBE4A    | KCNJ5   | CD4      | PTPN6    | CD163      | C3AR1  | ITPR2    |
| NCKAP1L        | RBMS1P1  | SELPLG   | GIT2    | MED13L   | LACC1    | MYCBP2-AS1 |        | SLC7A7   |
| VTI1B          | SIVA1    | FMN1     | USP8    | STUB1    | MEFV     | SLC7A6     | ARRB2  | POLR2A   |
| TMEM106A-AS1   |          | RHBDF2   | TNRC6C  | C19orf35 |          | CLEC4G     | CD209  | EIF3G    |
| TYROBP         | RASGRP4  | JOSD2    | LILRA1  | SIGLEC1  | ADAMTS1  | TRPM2      | MCM3AP | EP300    |
| NFAM1          | WAS      | CACNA1F  | VSIG4   | BTK      | DDX26B   | MPP1       |        | C22orf32 |

|        |        |           |          |       |      |      |
|--------|--------|-----------|----------|-------|------|------|
| GOBPID | Pvalue | OddsRatio | ExpCount | Count | Size | Term |
|--------|--------|-----------|----------|-------|------|------|

|                               |          |  |             |             |    |     |
|-------------------------------|----------|--|-------------|-------------|----|-----|
| GO:0002253                    | 1.53E-08 |  | 8.129535604 | 2.048370355 | 14 | 299 |
| activation of immune response |          |  |             |             |    |     |

|                       |          |  |             |             |    |     |
|-----------------------|----------|--|-------------|-------------|----|-----|
| GO:0046649            | 3.70E-08 |  | 6.441882638 | 2.966369109 | 16 | 433 |
| lymphocyte activation |          |  |             |             |    |     |

|                                     |          |  |             |             |    |     |
|-------------------------------------|----------|--|-------------|-------------|----|-----|
| GO:0051249                          | 6.51E-08 |  | 7.883979328 | 1.938758563 | 13 | 283 |
| regulation of lymphocyte activation |          |  |             |             |    |     |

STable4\_20PerPair

|                                             |          |             |             |    |     |
|---------------------------------------------|----------|-------------|-------------|----|-----|
| GO:0050864                                  | 7.76E-08 | 17.19584525 | 0.554909695 | 8  | 81  |
| regulation of B cell activation             |          |             |             |    |     |
| GO:0045577                                  | 7.90E-08 | 63.56382979 | 0.116462529 | 5  | 17  |
| regulation of B cell differentiation        |          |             |             |    |     |
| GO:0050865                                  | 8.49E-08 | 7.020275344 | 2.349802782 | 14 | 343 |
| regulation of cell activation               |          |             |             |    |     |
| GO:0050851                                  | 1.59E-07 | 12.48947368 | 0.842640648 | 9  | 123 |
| antigen receptor-mediated signaling pathway |          |             |             |    |     |

|                                                                    |          |             | STable4_20PerPair |    |     |   |
|--------------------------------------------------------------------|----------|-------------|-------------------|----|-----|---|
| GO:0050778                                                         | 1.76E-07 | 6.589176471 | 2.493668258       | 14 | 364 |   |
| positive regulation of immune response                             |          |             |                   |    |     |   |
| GO:0045579                                                         | 2.54E-07 | 120.8168421 | 0.061656633       | 4  | 9   |   |
| positive regulation of B cell differentiation                      |          |             |                   |    |     |   |
| GO:0042110                                                         | 2.61E-07 | 6.938668491 | 2.185385094       | 13 | 319 | T |
| cell activation                                                    |          |             |                   |    |     |   |
| GO:0002694                                                         | 2.80E-07 | 6.892630625 | 2.199086568       | 13 | 321 |   |
| regulation of leukocyte activation                                 |          |             |                   |    |     |   |
| GO:0002429                                                         | 3.10E-07 | 11.47419355 | 0.911148017       | 9  | 133 |   |
| immune response-activating cell surface receptor signaling pathway |          |             |                   |    |     |   |

STable4\_20PerPair

|                                                                    |          |             |             |    |     |   |
|--------------------------------------------------------------------|----------|-------------|-------------|----|-----|---|
| GO:0002768                                                         | 6.09E-07 | 10.53111111 | 0.986506124 | 9  | 144 |   |
| immune response-regulating cell surface receptor signaling pathway |          |             |             |    |     |   |
| GO:0002521                                                         | 1.02E-06 | 6.6882283   | 2.068922566 | 12 | 302 |   |
| leukocyte differentiation                                          |          |             |             |    |     |   |
| GO:0030098                                                         | 1.32E-06 | 8.199930499 | 1.397550343 | 10 | 204 |   |
| lymphocyte differentiation                                         |          |             |             |    |     |   |
| GO:0050853                                                         | 1.42E-06 | 31.75531915 | 0.198671372 | 5  | 29  | B |
| cell receptor signaling pathway                                    |          |             |             |    |     |   |
| GO:0050871                                                         | 1.76E-06 | 19.22580645 | 0.369939797 | 6  | 54  |   |
| positive regulation of B cell activation                           |          |             |             |    |     |   |

STable4\_20PerPair

|                                                |          |             |             |    |     |   |
|------------------------------------------------|----------|-------------|-------------|----|-----|---|
| GO:0002757                                     | 4.69E-06 | 7.054681648 | 1.609923189 | 10 | 235 |   |
| immune response-activating signal transduction |          |             |             |    |     |   |
| GO:0050900                                     | 5.87E-06 | 6.868524734 | 1.651027611 | 10 | 241 |   |
| leukocyte migration                            |          |             |             |    |     |   |
| GO:0001817                                     | 6.09E-06 | 5.566928351 | 2.459414573 | 12 | 359 |   |
| regulation of cytokine production              |          |             |             |    |     |   |
| GO:0030183                                     | 6.89E-06 | 14.86992716 | 0.465850114 | 6  | 68  | B |
| cell differentiation                           |          |             |             |    |     |   |
| GO:0002764                                     | 7.55E-06 | 6.663204608 | 1.698982769 | 10 | 248 |   |
| immune response-regulating signaling pathway   |          |             |             |    |     |   |



STable4\_20PerPair

|                               |          |             |             |   |     |   |
|-------------------------------|----------|-------------|-------------|---|-----|---|
| GO:0042113<br>cell activation | 9.97E-06 | 8.613565745 | 1.048162757 | 8 | 153 | B |
|-------------------------------|----------|-------------|-------------|---|-----|---|

|                                       |          |             |             |    |     |  |
|---------------------------------------|----------|-------------|-------------|----|-----|--|
| GO:0002252<br>immune effector process | 1.27E-05 | 5.155080214 | 2.644384472 | 12 | 386 |  |
|---------------------------------------|----------|-------------|-------------|----|-----|--|

|                                     |          |             |             |    |     |  |
|-------------------------------------|----------|-------------|-------------|----|-----|--|
| GO:0006954<br>inflammatory response | 1.56E-05 | 4.680659864 | 3.165040482 | 13 | 462 |  |
|-------------------------------------|----------|-------------|-------------|----|-----|--|

|                           |          |             |             |    |     |  |
|---------------------------|----------|-------------|-------------|----|-----|--|
| GO:0030097<br>hemopoiesis | 1.59E-05 | 4.669922481 | 3.171891219 | 13 | 463 |  |
|---------------------------|----------|-------------|-------------|----|-----|--|

|                                   |          |            |             |    |     |  |
|-----------------------------------|----------|------------|-------------|----|-----|--|
| GO:0001816<br>cytokine production | 1.59E-05 | 5.03070136 | 2.706041104 | 12 | 395 |  |
|-----------------------------------|----------|------------|-------------|----|-----|--|

STable4\_20PerPair

GO:0042098 1.62E-05 9.761750881 0.808386963 7 118 T  
 cell proliferation

GO:0051251 1.64E-05 6.866990291 1.472908449 9 215  
 positive regulation of lymphocyte activation

Tissue: Heart\_Left\_Ventricle=>Adipose\_Subcutaneous Type: asymmetric

SourceGene: ENSG00000228649.1

TargetGeneSet: TRIM63 ACTA1 NEB XIRP2 KBTBD10 TTN MYL1 WDR48 ODZ1  
 RP11 CMYA5 SRPK1 LMOD2 ANKRD2 NRAP RPL23AP64 RP3 POU5F1P3  
 MYL2 OAS3 MYH7 ATP2A1 MYLFP ENO3 MYH2 MYH1 SPAG9 CACNG1  
 FOXJ1 CKM TNNT1 C20orf85 EEF1A2 PVALB APOBEC3H

GOBPID Pvalue OddsRatio ExpCount Count Size Term

GO:0006936 2.68E-16 51.03650442 0.479620787 13 239  
 muscle contraction

GO:0003012 1.08E-15 45.50321146 0.533803889 13 266  
 muscle system process

STable4\_20PerPair

|                                                       |          |             |             |    |     |
|-------------------------------------------------------|----------|-------------|-------------|----|-----|
| GO:0030049                                            | 5.39E-15 | 176.8479263 | 0.07826448  | 8  | 39  |
| muscle filament sliding                               |          |             |             |    |     |
| GO:0033275                                            | 5.39E-15 | 176.8479263 | 0.07826448  | 8  | 39  |
| actin-myosin filament sliding                         |          |             |             |    |     |
| GO:0070252                                            | 1.03E-14 | 161.210084  | 0.084284825 | 8  | 42  |
| actin-mediated cell contraction                       |          |             |             |    |     |
| GO:0030048                                            | 1.89E-13 | 107.3464052 | 0.118400111 | 8  | 59  |
| actin filament-based movement                         |          |             |             |    |     |
| GO:0006941                                            | 1.08E-10 | 67.1644385  | 0.150508615 | 7  | 75  |
| striated muscle contraction                           |          |             |             |    |     |
| GO:0030029                                            | 6.19E-09 | 17.46071339 | 0.866929624 | 10 | 432 |
| actin filament-based process                          |          |             |             |    |     |
| GO:0003010                                            | 2.90E-08 | 1663.961538 | 0.008027126 | 3  | 4   |
| voluntary skeletal muscle contraction                 |          |             |             |    |     |
| GO:0014721                                            | 2.90E-08 | 1663.961538 | 0.008027126 | 3  | 4   |
| twitch skeletal muscle contraction                    |          |             |             |    |     |
| GO:0061061                                            | 6.47E-08 | 15.77475    | 0.820773649 | 9  | 409 |
| muscle structure development                          |          |             |             |    |     |
| GO:0007517                                            | 9.97E-08 | 18.24309927 | 0.608054806 | 8  | 303 |
| muscle organ development                              |          |             |             |    |     |
| GO:0010927                                            | 4.15E-06 | 25.25423729 | 0.246834129 | 5  | 123 |
| cellular component assembly involved in morphogenesis |          |             |             |    |     |
| GO:0003009                                            | 6.89E-06 | 103.8894231 | 0.038128849 | 3  | 19  |
| skeletal muscle contraction                           |          |             |             |    |     |

STable4\_20PerPair

GO:0045071 1.09E-05 87.46761134 0.044149194 3 22  
negative regulation of viral genome replication

GO:0048525 1.09E-05 87.46761134 0.044149194 3 22  
negative regulation of viral reproduction

GO:0050879 1.83E-05 72.23578595 0.05217632 3 26  
multicellular organismal movement

GO:0050881 1.83E-05 72.23578595 0.05217632 3 26  
musculoskeletal movement

Tissue: Heart\_Left\_Ventricle=>Adipose\_Subcutaneous Type: asymmetric

SourceGene: ENSG00000231536.1 antisense RNA

TargetGeneSet: RPS8 ADORA3 FCGR2A NEURL1B RP11 CTB RP4 RSPH9 STK3  
RPL8 RP1 PNLIPRP3 NCKAP1L RPL18AP3 TERF1P5 RPL4 RPL13  
RPS15 ELAVL1 RPL18A SSBP4 ETV2 RPL18 LILRA1 RPS4X

GOBPID Pvalue OddsRatio ExpCount Count Size Term

GO:0006415 3.44E-13 106.3725672 0.132239983 8 91  
translational termination

GO:0006414 1.11E-12 90.93100714 0.152584596 8 105  
translational elongation

GO:0006614 1.11E-12 90.93100714 0.152584596 8 105  
SRP-dependent cotranslational protein targeting to membrane

GO:0006613 1.20E-12 89.99686028 0.154037783 8 106  
cotranslational protein targeting to membrane

GO:0045047 1.20E-12 89.99686028 0.154037783 8 106

STable4\_20PerPair

protein targeting to ER

|                                                                       |          |             |             |   |     |      |
|-----------------------------------------------------------------------|----------|-------------|-------------|---|-----|------|
| GO:0072599                                                            | 1.20E-12 | 89.99686028 | 0.154037783 | 8 | 106 |      |
| establishment of protein localization to endoplasmic reticulum        |          |             |             |   |     |      |
| GO:0070972                                                            | 2.89E-12 | 80.11188811 | 0.171476022 | 8 | 118 |      |
| protein localization to endoplasmic reticulum                         |          |             |             |   |     |      |
| GO:0000184                                                            | 3.10E-12 | 79.38461538 | 0.172929209 | 8 | 119 |      |
| "nuclear-transcribed mRNA catabolic process, nonsense-mediated decay" |          |             |             |   |     |      |
| GO:0019080                                                            | 2.14E-11 | 61.48251748 | 0.219431181 | 8 | 151 |      |
| viral genome expression                                               |          |             |             |   |     |      |
| GO:0019083                                                            | 2.14E-11 | 61.48251748 | 0.219431181 | 8 | 151 |      |
| viral transcription                                                   |          |             |             |   |     |      |
| GO:0006413                                                            | 2.26E-11 | 61.05128205 | 0.220884368 | 8 | 152 |      |
| translational initiation                                              |          |             |             |   |     |      |
| GO:0006612                                                            | 2.38E-11 | 60.62599469 | 0.222337554 | 8 | 153 |      |
| protein targeting to membrane                                         |          |             |             |   |     |      |
| GO:0043624                                                            | 2.38E-11 | 60.62599469 | 0.222337554 | 8 | 153 |      |
| cellular protein complex disassembly                                  |          |             |             |   |     |      |
| GO:0043241                                                            | 3.08E-11 | 58.58461538 | 0.229603488 | 8 | 158 |      |
| protein complex disassembly                                           |          |             |             |   |     |      |
| GO:0000956                                                            | 5.30E-11 | 54.53989489 | 0.245588541 | 8 | 169 |      |
| nuclear-transcribed mRNA catabolic process                            |          |             |             |   |     |      |
| GO:0034623                                                            | 6.69E-11 | 52.87859129 | 0.252854474 | 8 | 174 |      |
| cellular macromolecular complex disassembly                           |          |             |             |   |     |      |
| GO:0006402                                                            | 8.03E-11 | 51.6199095  | 0.25866722  | 8 | 178 | mRNA |
| catabolic process                                                     |          |             |             |   |     |      |
| GO:0032984                                                            | 8.40E-11 | 51.31443995 | 0.260120407 | 8 | 179 |      |
| macromolecular complex disassembly                                    |          |             |             |   |     |      |

STable4\_20PerPair

|                                                    |          |             |             |   |     |     |
|----------------------------------------------------|----------|-------------|-------------|---|-----|-----|
| GO:0072594                                         | 2.39E-10 | 44.69073783 | 0.296450073 | 8 | 204 |     |
| establishment of protein localization to organelle |          |             |             |   |     |     |
| GO:0006401                                         | 2.49E-10 | 44.46075752 | 0.297903259 | 8 | 205 | RNA |
| catabolic process                                  |          |             |             |   |     |     |
| GO:0019058                                         | 6.43E-10 | 39.20524319 | 0.335686112 | 8 | 231 |     |
| viral infectious cycle                             |          |             |             |   |     |     |
| GO:0022415                                         | 1.64E-09 | 34.62271062 | 0.377828524 | 8 | 260 |     |
| viral reproductive process                         |          |             |             |   |     |     |
| GO:0071845                                         | 3.29E-09 | 31.55852843 | 0.412705003 | 8 | 284 |     |
| cellular component disassembly at cellular level   |          |             |             |   |     |     |
| GO:0022411                                         | 3.67E-09 | 31.0989011  | 0.41851775  | 8 | 288 |     |
| cellular component disassembly                     |          |             |             |   |     |     |
| GO:0016032                                         | 1.20E-07 | 19.42976211 | 0.65538717  | 8 | 451 |     |
| viral reproduction                                 |          |             |             |   |     |     |
| GO:0033365                                         | 1.74E-07 | 18.48138958 | 0.687357276 | 8 | 473 |     |
| protein localization to organelle                  |          |             |             |   |     |     |
| GO:0006605                                         | 1.76E-07 | 18.44040938 | 0.688810463 | 8 | 474 |     |
| protein targeting                                  |          |             |             |   |     |     |

Tissue: Heart\_Left\_Ventricle=>Adipose\_Subcutaneous      Type: asymmetric

SourceGene:      FAM124B(ENSG00000124019.9)

|                |        |       |       |        |       |       |        |        |      |
|----------------|--------|-------|-------|--------|-------|-------|--------|--------|------|
| TargetGeneSet: | WASF2  | RP4   | KIF2C | DDAH1  | RP11  | UGGT1 | CDCA7  | KLF7   |      |
| ARPC4          | FANCD2 | CENPE | BRCC3 | KIF20A | ANLN  | PBK   | PTP4A3 | NAPRT1 | MELK |
| BUB1B          | OIP5   | CCNB2 | PLK1  | HIC1   | BIRC5 | TYMS  | NDC80  | LIG1   | E2F1 |
| C22orf29       |        | MT    |       |        |       |       |        |        |      |

|        |        |           |          |       |      |      |
|--------|--------|-----------|----------|-------|------|------|
| GOBPID | Pvalue | OddsRatio | ExpCount | Count | Size | Term |
|--------|--------|-----------|----------|-------|------|------|

| GO ID                                          | P-value  | STable4_20  | PerPair     | Count | Count | Category |
|------------------------------------------------|----------|-------------|-------------|-------|-------|----------|
| GO:0000087<br>phase of mitotic cell cycle      | 4.56E-11 | 24.64231137 | 0.722441354 | 11    | 360   | M        |
| GO:0051301<br>division                         | 5.17E-10 | 19.37402368 | 0.907065255 | 11    | 452   | cell     |
| GO:0000280<br>nuclear division                 | 8.13E-10 | 21.79876161 | 0.702373538 | 10    | 350   |          |
| GO:0007067<br>mitosis                          | 8.13E-10 | 21.79876161 | 0.702373538 | 10    | 350   |          |
| GO:0048285<br>organelle fission                | 1.39E-09 | 20.55847953 | 0.742509169 | 10    | 370   |          |
| GO:0000236<br>mitotic prometaphase             | 1.48E-08 | 47.36268575 | 0.170576431 | 6     | 85    |          |
| GO:0051329<br>interphase of mitotic cell cycle | 7.65E-06 | 12.01735093 | 0.760570203 | 7     | 379   |          |
| GO:0051325<br>interphase                       | 8.77E-06 | 11.7576555  | 0.776624455 | 7     | 387   |          |

Tissue: Heart\_Left\_Ventricle=>Adipose\_Subcutaneous      Type: cluster

SourceGene:      GABRA1(ENSG00000022355.10)

STable4\_20PerPair

TargetGeneSet: PANK4 KCNAB2 ESPN C1QC C1QB FUCA1 UBXN11 CD52 FGR  
 C1orf38 RAB42 LAPTM5 BRD8 SLC6A9 CD53 C1orf88 C1orf162 ADORA3  
 APH1A CTSS ARHGAP30 FCER1G FAM20B NPL PRG4 PTPRC RP11 CR1  
 RCOR3 CDC42BPA DISC1 NID1 GPR137B VAMP8 BDP1 KYNU RPE  
 C2orf62 SLC11A1 ARL4C FANCD2 CMTM7 HCLS1 CD86 CTBP1 RBPJ TBC1D1  
 CCDC109B FYB ITGA1 HEXB PAPP4 CTNNA1 GPX3 DOCK2 MGAT1  
 KIF13A C2 UNC5CL ZC3H12D WTAP AVL9 PILRA PMPCB TFEC TBXAS1 CTSB  
 MSR1 PREX2 SLA KIAA1432 TLN1 FAM27E2 SYK COL15A1 DAB2IP RSU1  
 VSTM4 HPSE2 COMMD9 PRG2 SERPING1 LPXN MS4A6A MS4A7 UNC93B1  
 ALDH3B1 ANO1 ANO1-AS1 NEU3 IL10RA PTPN6 C1S CD163 DAZAP2 BIN2  
 PRR13 IL23A TMEM55B SLC7A7 LTB4R NPC2 FLVCR2 GALC FAM98B UBR1  
 UNC13C FAM96A HEXA ADPGK SLC5A11 APOBR ZDHHC7 CYBA ARRB2 SCIMP CD68  
 PIK3R5 PMP22 MPRIP ABHD15 SSH2 RNF135 EVI2B EVI2A FMNL1 RP13  
 MPPE1 CABYR TCF4 STXBP2 NOTCH3 IFI30 TYROBP ZNF527 PSG5 PLAUR  
 C5AR1 CA11 SIGLEC9 SIGLEC7 OSCAR LILRB2 SIRPG SIRPB1 HCK C20orf111  
 TTPAL PLTP DNAJC28 ARVCF HPS4 GPR143 TLR8 PIGA WAS VSIG4 RP1  
 SASH3 RAP2C

GOBPID Pvalue OddsRatio ExpCount Count Size Term

GO:0050778 1.46E-11 7.708769994 3.324891011 21 364  
 positive regulation of immune response

GO:0002252 4.38E-11 7.232728619 3.525845962 21 386  
 immune effector process



STable4\_20PerPair

|                             |          |             |             |    |     |
|-----------------------------|----------|-------------|-------------|----|-----|
| GO:0002443                  | 8.56E-11 | 9.990450928 | 1.927340668 | 16 | 211 |
| leukocyte mediated immunity |          |             |             |    |     |

|                               |          |             |             |    |     |
|-------------------------------|----------|-------------|-------------|----|-----|
| GO:0002253                    | 1.87E-09 | 7.358279371 | 2.731160473 | 17 | 299 |
| activation of immune response |          |             |             |    |     |

|                          |          |             |             |    |     |
|--------------------------|----------|-------------|-------------|----|-----|
| GO:0002250               | 3.44E-09 | 9.114314665 | 1.808594561 | 14 | 198 |
| adaptive immune response |          |             |             |    |     |

STable4\_20PerPair

GO:0002449      4.02E-09      10.04829204      1.525430766      13      167  
 lymphocyte mediated immunity

GO:0002697      4.18E-09      8.966192332      1.835997509      14      201  
 regulation of immune effector process

GO:0002460      9.78E-08      8.372781065      1.65331119      12      181  
 adaptive immune response based on somatic recombination of immune receptors built  
 from immunoglobulin superfamily domains

GO:0002703      1.54E-07      12.55010285      0.840357069      9      92  
 regulation of leukocyte mediated immunity

STable4\_20PerPair

|                                                   |          |             |             |    |     |            |
|---------------------------------------------------|----------|-------------|-------------|----|-----|------------|
| GO:0046479                                        | 8.09E-07 | 89.4625     | 0.082208844 | 4  | 9   |            |
| glycosphingolipid catabolic process               |          |             |             |    |     |            |
| GO:0006956                                        | 1.63E-06 | 14.263      | 0.575461906 | 7  | 63  | complement |
| activation                                        |          |             |             |    |     |            |
| GO:0002283                                        | 2.09E-06 | 63.89285714 | 0.100477476 | 4  | 11  |            |
| neutrophil activation involved in immune response |          |             |             |    |     |            |
| GO:0002764                                        | 2.83E-06 | 5.967372881 | 2.265310359 | 12 | 248 |            |
| immune response-regulating signaling pathway      |          |             |             |    |     |            |

STable4\_20PerPair

|                                            |          |             |             |   |    |
|--------------------------------------------|----------|-------------|-------------|---|----|
| GO:0006689                                 | 2.96E-06 | 332.9767442 | 0.036537264 | 3 | 4  |
| ganglioside catabolic process              |          |             |             |   |    |
| GO:0019377                                 | 3.11E-06 | 55.90234375 | 0.109611792 | 4 | 12 |
| glycolipid catabolic process               |          |             |             |   |    |
| GO:0006958                                 | 5.92E-06 | 15.4491342  | 0.456715798 | 6 | 50 |
| "complement activation, classical pathway" |          |             |             |   |    |

STable4\_20PerPair

|                                         |          |             |             |   |     |
|-----------------------------------------|----------|-------------|-------------|---|-----|
| GO:0016064                              | 7.86E-06 | 8.904478547 | 1.013909072 | 8 | 111 |
| immunoglobulin mediated immune response |          |             |             |   |     |

|                        |          |             |            |   |     |   |
|------------------------|----------|-------------|------------|---|-----|---|
| GO:0019724             | 9.57E-06 | 8.650639075 | 1.04131202 | 8 | 114 | B |
| cell mediated immunity |          |             |            |   |     |   |

|                            |          |          |             |   |    |
|----------------------------|----------|----------|-------------|---|----|
| GO:0072376                 | 9.73E-06 | 10.63552 | 0.749013909 | 7 | 82 |
| protein activation cascade |          |          |             |   |    |

|                                       |          |            |             |   |    |
|---------------------------------------|----------|------------|-------------|---|----|
| GO:0043304                            | 1.11E-05 | 37.2578125 | 0.146149055 | 4 | 16 |
| regulation of mast cell degranulation |          |            |             |   |    |

STable4\_20PerPair

|                                                                              |          |             |             |   |     |      |
|------------------------------------------------------------------------------|----------|-------------|-------------|---|-----|------|
| GO:0042098<br>cell proliferation                                             | 1.23E-05 | 8.33372434  | 1.077849284 | 8 | 118 | T    |
| GO:0033006<br>regulation of mast cell activation involved in immune response | 1.44E-05 | 34.38942308 | 0.155283371 | 4 | 17  |      |
| GO:0002263<br>activation involved in immune response                         | 1.67E-05 | 7.96858345  | 1.123520864 | 8 | 123 | cell |
| GO:0002366<br>Leukocyte activation involved in immune response               | 1.67E-05 | 7.96858345  | 1.123520864 | 8 | 123 |      |

STable4\_20PerPair

GO:0031347 1.89E-05 4.248616618 3.681129334 14 403  
 regulation of defense response

Tissue: Adipose\_Subcutaneous=>Heart\_Left\_Ventricle Type: asymmetric

SourceGene: HIRA(ENSG00000100084.9) histone cell cycle regulator

|                |         |        |           |           |         |         |         |       |        |
|----------------|---------|--------|-----------|-----------|---------|---------|---------|-------|--------|
| TargetGeneSet: | TLL10   | C1QA   | C1QB      | E2F2      | CLSPN   | CDC48   | TMEM125 | CDC20 |        |
| FAM72D         | PRPF3   | GPR161 | NEK2      | C1orf148  | FTH1P2  | NCAPH   | CKAP2L  | PSD4  |        |
| RABL2A         | MARCO   | HJURP  | OXTR      | KIF15     | CAMK2N2 | RP11    | SLC39A8 | CENPE | BRCC3  |
| CCNB1          | HMMR    | RMND5B | DHX16     | SLC25A27  | FKBP1C  | RNASET2 | RPL23P8 | CHN2  | ANLN   |
| MELK           | ZNF658B | SAPCD2 | CDK1      | C10orf116 | AGAP11  | CEP55   | PIK3AP1 | MKI67 |        |
| RIC8A          | EHF     | MPP2   | EEF1A1P33 | ESPL1     | CSRP2   | EP400NL | DLGAP5  | XRCC3 |        |
| SIVA1          | BUB1B   | NUSAP1 | CCNB2     | E4F1      | FLYWCH1 | CLDN9   | ANKS3   | CTRB2 | AURKB  |
| TOP2A          | KIF18B  | BRIP1  | BIRC5     | TYMS      | NDC80   | ZNF562  | ZNF653  | ASF1B | LRRC25 |
| PI3            | UBE2C   | CTSZ   | RP1       | APOBEC3B  | CTA     | TMEM27  | KIF4A   | RP13  | TPX2   |
| FAM199X        |         |        |           |           |         |         |         |       |        |

|        |        |           |          |       |      |      |
|--------|--------|-----------|----------|-------|------|------|
| GOBPID | Pvalue | OddsRatio | ExpCount | Count | Size | Term |
|--------|--------|-----------|----------|-------|------|------|

STable4\_20PerPair

|                                                |          |             |             |    |     |      |
|------------------------------------------------|----------|-------------|-------------|----|-----|------|
| GO:0000280<br>nuclear division                 | 2.14E-19 | 20.49376988 | 1.646944848 | 22 | 350 |      |
| GO:0007067<br>mitosis                          | 2.14E-19 | 20.49376988 | 1.646944848 | 22 | 350 |      |
| GO:0000087<br>phase of mitotic cell cycle      | 3.92E-19 | 19.8732956  | 1.694000415 | 22 | 360 | M    |
| GO:0048285<br>organelle fission                | 7.07E-19 | 19.28848076 | 1.741055982 | 22 | 370 |      |
| GO:0051301<br>division                         | 7.66E-16 | 14.46374093 | 2.126911632 | 21 | 452 | cell |
| GO:0010564<br>regulation of cell cycle process | 4.01E-13 | 12.71545455 | 1.948100477 | 18 | 414 |      |



STable4\_20PerPair

|                                      |          |             |             |    |     |
|--------------------------------------|----------|-------------|-------------|----|-----|
| GO:0007059                           | 1.94E-12 | 23.86439732 | 0.658777939 | 12 | 140 |
| chromosome segregation               |          |             |             |    |     |
| GO:0000819                           | 2.05E-12 | 50.87110761 | 0.244688949 | 9  | 52  |
| sister chromatid segregation         |          |             |             |    |     |
| GO:0007346                           | 7.69E-12 | 13.85121855 | 1.425783683 | 15 | 303 |
| regulation of mitotic cell cycle     |          |             |             |    |     |
| GO:0007017                           | 2.67E-11 | 11.4311365  | 1.849283787 | 16 | 393 |
| microtubule-based process            |          |             |             |    |     |
| GO:0000070                           | 6.08E-11 | 46.64065041 | 0.230572279 | 8  | 49  |
| mitotic sister chromatid segregation |          |             |             |    |     |
| GO:0007051                           | 3.49E-09 | 26.50185185 | 0.376444537 | 8  | 80  |
| spindle organization                 |          |             |             |    |     |

STable4\_20PerPair

|                                       |          |             |             |    |     |      |
|---------------------------------------|----------|-------------|-------------|----|-----|------|
| GO:0000236                            | 5.68E-09 | 24.77229437 | 0.39997232  | 8  | 85  |      |
| mitotic prometaphase                  |          |             |             |    |     |      |
| GO:0000086                            | 2.25E-08 | 16.09943503 | 0.677600166 | 9  | 144 | G2/M |
| transition of mitotic cell cycle      |          |             |             |    |     |      |
| GO:0000226                            | 4.54E-08 | 10.56541548 | 1.265794755 | 11 | 269 |      |
| microtubule cytoskeleton organization |          |             |             |    |     |      |
| GO:0007088                            | 1.75E-07 | 20.26189031 | 0.41408899  | 7  | 88  |      |
| regulation of mitosis                 |          |             |             |    |     |      |
| GO:0051783                            | 1.75E-07 | 20.26189031 | 0.41408899  | 7  | 88  |      |
| regulation of nuclear division        |          |             |             |    |     |      |
| GO:0030261                            | 2.58E-07 | 45.58095238 | 0.141166701 | 5  | 30  |      |
| chromosome condensation               |          |             |             |    |     |      |
| GO:0071156                            | 4.00E-07 | 9.59068694  | 1.242266971 | 10 | 264 |      |
| regulation of cell cycle arrest       |          |             |             |    |     |      |

STable4\_20PerPair

|                                                   |          |             |             |    |     |      |
|---------------------------------------------------|----------|-------------|-------------|----|-----|------|
| GO:0051656                                        | 4.52E-07 | 17.44384374 | 0.475261228 | 7  | 101 |      |
| establishment of organelle localization           |          |             |             |    |     |      |
| GO:0008608                                        | 1.02E-06 | 69.08653846 | 0.079994464 | 4  | 17  |      |
| attachment of spindle microtubules to kinetochore |          |             |             |    |     |      |
| GO:0007050                                        | 1.08E-06 | 7.560276389 | 1.736350426 | 11 | 369 | cell |
| cycle arrest                                      |          |             |             |    |     |      |
| GO:0051329                                        | 1.40E-06 | 7.349590008 | 1.783405993 | 11 | 379 |      |
| interphase of mitotic cell cycle                  |          |             |             |    |     |      |
| GO:0031577                                        | 1.48E-06 | 30.77220077 | 0.197633382 | 5  | 42  |      |
| spindle checkpoint                                |          |             |             |    |     |      |
| GO:0051313                                        | 1.65E-06 | 59.86666667 | 0.089405577 | 4  | 19  |      |
| attachment of spindle microtubules to chromosome  |          |             |             |    |     |      |

STable4\_20PerPair

|                                                                                                |          |             |             |    |     |      |
|------------------------------------------------------------------------------------------------|----------|-------------|-------------|----|-----|------|
| GO:0030071                                                                                     | 1.67E-06 | 29.96031746 | 0.202338938 | 5  | 43  |      |
| regulation of mitotic metaphase/anaphase transition                                            |          |             |             |    |     |      |
| GO:0051325                                                                                     | 1.72E-06 | 7.189109742 | 1.821050446 | 11 | 387 |      |
| interphase                                                                                     |          |             |             |    |     |      |
| GO:0000075                                                                                     | 1.86E-06 | 9.263839383 | 1.138744724 | 9  | 242 | cell |
| cycle checkpoint                                                                               |          |             |             |    |     |      |
| GO:0034501                                                                                     | 1.97E-06 | 221.2307692 | 0.02823334  | 3  | 6   |      |
| protein localization to kinetochore                                                            |          |             |             |    |     |      |
| GO:0007091                                                                                     | 2.10E-06 | 28.45833333 | 0.211750052 | 5  | 45  |      |
| mitotic metaphase/anaphase transition                                                          |          |             |             |    |     |      |
| GO:0031145                                                                                     | 2.46E-06 | 17.97989108 | 0.390561207 | 6  | 83  |      |
| anaphase-promoting complex-dependent proteasomal ubiquitin-dependent protein catabolic process |          |             |             |    |     |      |

STable4\_20PerPair

|                                          |          |             |             |    |     |
|------------------------------------------|----------|-------------|-------------|----|-----|
| GO:0050000                               | 2.53E-06 | 52.81617647 | 0.098816691 | 4  | 21  |
| chromosome localization                  |          |             |             |    |     |
| GO:0051303                               | 2.53E-06 | 52.81617647 | 0.098816691 | 4  | 21  |
| establishment of chromosome localization |          |             |             |    |     |
| GO:0007093                               | 3.89E-06 | 12.38909588 | 0.654072383 | 7  | 139 |
| mitotic cell cycle checkpoint            |          |             |             |    |     |
| GO:0051983                               | 4.44E-06 | 44.884375   | 0.112933361 | 4  | 24  |
| regulation of chromosome segregation     |          |             |             |    |     |
| GO:0000910                               | 5.10E-06 | 15.72030792 | 0.442322331 | 6  | 94  |
| cytokinesis                              |          |             |             |    |     |
| GO:0045786                               | 5.53E-06 | 6.322666996 | 2.056328282 | 11 | 437 |
| negative regulation of cell cycle        |          |             |             |    |     |

| GO:ID                                           | Pvalue   | OddsRatio   | ExpCount    | Count       | Size | Term    |
|-------------------------------------------------|----------|-------------|-------------|-------------|------|---------|
| GO:0051640<br>organelle localization            | 6.44E-06 | 11.42726126 | 11.42726126 | 0.705833506 | 7    | 150     |
| GO:0006323<br>packaging                         | 7.34E-06 | 11.19009656 | 11.19009656 | 0.719950176 | 7    | 153 DNA |
| GO:0045787<br>positive regulation of cell cycle | 8.19E-06 | 14.40221774 | 14.40221774 | 0.479966784 | 6    | 102     |
| GO:0007052<br>mitotic spindle organization      | 1.66E-05 | 30.93534483 | 30.93534483 | 0.155283371 | 4    | 33      |

Tissue: Adipose\_Subcutaneous=>Heart\_Left\_Ventricle      Type: asymmetric

SourceGene: HSPD1P16(ENSG00000218792.2)      HSPD1P16 heat shock 60kDa protein 1  
(chaperonin) pseudogene 16

TargetGeneSet: ARHGEF19      CAPZB      RAB42      MPL      RP11      MCOLN2      GORAB  
METTL13 TRMT1L IPO9-AS1      ARL8A      ARHGEF33      RPL37A      TMIE      CTD  
PPP1R2P3      C6orf195      C8orf59      RPL30      RPL8      NOL8      RPLP2      RPL27A  
ZNF408 MEN1      RPS25      ANKRD13A      MPHOSPH9      UFM1      ARHGEF40  
RPL36A NDUFB1      CCDC78      FBXL19-AS1      RPL17      RPL19      HEXIM2      RPL38      SIRT7  
CDC37      ATP13A1      IGSF23      LZTR1

GOBPID    Pvalue    OddsRatio      ExpCount      Count    Size    Term

STable4\_20PerPair

|                                                                |          |             |             |    |     |
|----------------------------------------------------------------|----------|-------------|-------------|----|-----|
| GO:0006415                                                     | 2.59E-13 | 68.41622481 | 0.201508546 | 9  | 91  |
| translational termination                                      |          |             |             |    |     |
| GO:0043624                                                     | 6.95E-13 | 45.37825811 | 0.338800083 | 10 | 153 |
| cellular protein complex disassembly                           |          |             |             |    |     |
| GO:0043241                                                     | 9.61E-13 | 43.82985258 | 0.349871981 | 10 | 158 |
| protein complex disassembly                                    |          |             |             |    |     |
| GO:0006414                                                     | 9.72E-13 | 58.38179348 | 0.232509861 | 9  | 105 |
| translational elongation                                       |          |             |             |    |     |
| GO:0006614                                                     | 9.72E-13 | 58.38179348 | 0.232509861 | 9  | 105 |
| SRP-dependent cotranslational protein targeting to membrane    |          |             |             |    |     |
| GO:0006613                                                     | 1.06E-12 | 57.77588525 | 0.234724241 | 9  | 106 |
| cotranslational protein targeting to membrane                  |          |             |             |    |     |
| GO:0045047                                                     | 1.06E-12 | 57.77588525 | 0.234724241 | 9  | 106 |
| protein targeting to ER                                        |          |             |             |    |     |
| GO:0072599                                                     | 1.06E-12 | 57.77588525 | 0.234724241 | 9  | 106 |
| establishment of protein localization to endoplasmic reticulum |          |             |             |    |     |
| GO:0034623                                                     | 2.53E-12 | 39.5094235  | 0.385302055 | 10 | 174 |
| cellular macromolecular complex disassembly                    |          |             |             |    |     |
| GO:0070972                                                     | 2.84E-12 | 51.37215796 | 0.261296796 | 9  | 118 |
| protein localization to endoplasmic reticulum                  |          |             |             |    |     |

STable4\_20PerPair

|                                                                       |          |             |             |    |     |      |
|-----------------------------------------------------------------------|----------|-------------|-------------|----|-----|------|
| GO:0000184                                                            | 3.07E-12 | 50.90158103 | 0.263511176 | 9  | 119 |      |
| "nuclear-transcribed mRNA catabolic process, nonsense-mediated decay" |          |             |             |    |     |      |
| GO:0032984                                                            | 3.37E-12 | 38.32705756 | 0.396373953 | 10 | 179 |      |
| macromolecular complex disassembly                                    |          |             |             |    |     |      |
| GO:0019080                                                            | 2.67E-11 | 39.34262094 | 0.334371324 | 9  | 151 |      |
| viral genome expression                                               |          |             |             |    |     |      |
| GO:0019083                                                            | 2.67E-11 | 39.34262094 | 0.334371324 | 9  | 151 |      |
| viral transcription                                                   |          |             |             |    |     |      |
| GO:0006413                                                            | 2.83E-11 | 39.06476133 | 0.336585703 | 9  | 152 |      |
| translational initiation                                              |          |             |             |    |     |      |
| GO:0006612                                                            | 3.01E-11 | 38.79076087 | 0.338800083 | 9  | 153 |      |
| protein targeting to membrane                                         |          |             |             |    |     |      |
| GO:0000956                                                            | 7.36E-11 | 34.87255435 | 0.374230157 | 9  | 169 |      |
| nuclear-transcribed mRNA catabolic process                            |          |             |             |    |     |      |
| GO:0006402                                                            | 1.17E-10 | 32.99459738 | 0.394159574 | 9  | 178 | mRNA |
| catabolic process                                                     |          |             |             |    |     |      |
| GO:0071845                                                            | 3.23E-10 | 23.46549436 | 0.628883814 | 10 | 284 |      |
| cellular component disassembly at cellular level                      |          |             |             |    |     |      |
| GO:0022411                                                            | 3.71E-10 | 23.12132112 | 0.637741333 | 10 | 288 |      |
| cellular component disassembly                                        |          |             |             |    |     |      |



| GO ID                                                                   | P-value  | Count       | Ratio       | Count | Count | Category |
|-------------------------------------------------------------------------|----------|-------------|-------------|-------|-------|----------|
| GO:0072594                                                              | 3.95E-10 | 28.54314381 | 0.451733444 | 9     | 204   |          |
| Stable4_20PerPair<br>establishment of protein localization to organelle |          |             |             |       |       |          |
| GO:0006401                                                              | 4.13E-10 | 28.39551908 | 0.453947824 | 9     | 205   | RNA      |
| catabolic process                                                       |          |             |             |       |       |          |
| GO:0019058                                                              | 1.19E-09 | 25.02408931 | 0.511521694 | 9     | 231   |          |
| viral infectious cycle                                                  |          |             |             |       |       |          |
| GO:0022415                                                              | 3.36E-09 | 22.0876494  | 0.575738703 | 9     | 260   |          |
| viral reproductive process                                              |          |             |             |       |       |          |
| GO:0006605                                                              | 4.42E-08 | 13.67065047 | 1.049615944 | 10    | 474   |          |
| protein targeting                                                       |          |             |             |       |       |          |
| GO:0016032                                                              | 3.84E-07 | 12.37389337 | 0.998685212 | 9     | 451   |          |
| viral reproduction                                                      |          |             |             |       |       |          |
| GO:0033365                                                              | 5.73E-07 | 11.76864693 | 1.047401564 | 9     | 473   |          |
| protein localization to organelle                                       |          |             |             |       |       |          |

Tissue: Heart\_Left\_Ventricle=>Adipose\_Subcutaneous      Type: asymmetric

SourceGene: IFIT1(ENSG00000185745.8)      interferon-induced protein with  
tetratricopeptide repeats 1

STable4\_20PerPair

|                |         |          |         |         |          |        |        |         |          |      |
|----------------|---------|----------|---------|---------|----------|--------|--------|---------|----------|------|
| TargetGeneSet: | EIF1AX  | RCN3     | SLC30A2 | HMG2    | FGR      | CDC20  | STIL   | RP11    | MCL1     |      |
| FCRLA          | RASAL2  | KIF14    | PPP2R5A | ANGEL2  | CENPF    | ODC1   | RHOB   | XPO1    | SH3RF3   |      |
| LINC00116      |         | BUB1     | CCNT2   | SGOL2   | COPS8    | SGOL1  | LZTFL1 | FAM116A | PHLDB2   | BOC  |
| BZW1P2         | CCNL1   | CCRL1    | GUF1    | CORIN   | PLK4     | HMGB2  | POLK   | GPR150  | FSTL4    |      |
| KIF20A         | PCYOX1L | HMMR     | TRIM41  | C6orf62 | FKBP5    | KCTD20 | UBR2   | SLC29A1 | ANKRD6   |      |
| ZNF259P1       |         | MAN1A1   | STEAP1B | ANLN    | LAMB1    | KCND2  | FAM40B | CDCA2   | PBK      |      |
| TMEM67         | MPDZ    | MELK     | KLF9    | KLF4    | GBGT1    | SYT15  | CEP55  | PHBP9   | LZTS2    |      |
| ZNF215         | KIF18A  | CAT      | RPLP0P2 | PELI3   | AASDHPPT |        | MPP2   | GRIN2B  | TMEM106C |      |
| TROAP          | DNAJC14 | TMEM198B |         | SDSL    | CAMKK2   | GTF2H3 | DIAPH3 | DLGAP5  | RHOJ     | FCF1 |
| OIP5           | NUSAP1  | ATP8B4   | LARP6   | PAQR4   | HMOX2    | PLK1   | SHCBP1 | ORC6    | CDT1     |      |
| ZBTB4          | SPAG5   | PNMT     | VAT1    | MPP3    | KIF18B   | H3F3B  | BIRC5  | TYMS    | RNF125   |      |
| SLC25A23       |         | KANK2    | ZNF441  | FKBP8   | CEACAM4  | ZNF665 | TPX2   | SAMHD1  | UBE2C    |      |
| TIAM1          | PKNOX1  | CDC45    | ZNF74   | SAMM50  | ARHGAP6  | FIGF   |        |         |          |      |

|        |        |           |          |       |      |      |
|--------|--------|-----------|----------|-------|------|------|
| GOBPID | Pvalue | OddsRatio | ExpCount | Count | Size | Term |
|--------|--------|-----------|----------|-------|------|------|

|                             |          |  |             |             |    |     |   |
|-----------------------------|----------|--|-------------|-------------|----|-----|---|
| GO:0000087                  | 5.68E-16 |  | 11.95300445 | 2.565912394 | 23 | 360 | M |
| phase of mitotic cell cycle |          |  |             |             |    |     |   |

|                  |          |  |             |             |    |     |  |
|------------------|----------|--|-------------|-------------|----|-----|--|
| GO:0000280       | 3.75E-15 |  | 11.60945498 | 2.494637049 | 22 | 350 |  |
| nuclear division |          |  |             |             |    |     |  |

|            |          |  |             |             |    |     |  |
|------------|----------|--|-------------|-------------|----|-----|--|
| GO:0007067 | 3.75E-15 |  | 11.60945498 | 2.494637049 | 22 | 350 |  |
| mitosis    |          |  |             |             |    |     |  |

STable4\_20PerPair

GO:0048285 1.18E-14 10.92663545 2.637187738 22 370  
 organelle fission

GO:0051301 7.49E-14 9.328001166 3.221645561 23 452 cell  
 division

GO:0010564 6.88E-10 7.460962567 2.950799253 18 414  
 regulation of cell cycle process

GO:0000236 8.75E-09 17.97984323 0.605840426 9 85  
 mitotic prometaphase

GO:0007059 5.78E-08 11.76013234 0.99785482 10 140

chromosome segregation

STable4\_20PerPair

|                                  |          |             |             |    |     |
|----------------------------------|----------|-------------|-------------|----|-----|
| GO:0007346                       | 2.31E-07 | 7.002068966 | 2.159642931 | 13 | 303 |
| regulation of mitotic cell cycle |          |             |             |    |     |

|                                                     |          |             |            |   |    |
|-----------------------------------------------------|----------|-------------|------------|---|----|
| GO:0030071                                          | 5.57E-07 | 23.92477013 | 0.30648398 | 6 | 43 |
| regulation of mitotic metaphase/anaphase transition |          |             |            |   |    |

|                                       |          |             |             |   |    |
|---------------------------------------|----------|-------------|-------------|---|----|
| GO:0007091                            | 7.36E-07 | 22.69468676 | 0.320739049 | 6 | 45 |
| mitotic metaphase/anaphase transition |          |             |             |   |    |

|                                 |          |             |             |    |     |
|---------------------------------|----------|-------------|-------------|----|-----|
| GO:0071156                      | 2.78E-06 | 6.661153119 | 1.881669089 | 11 | 264 |
| regulation of cell cycle arrest |          |             |             |    |     |

STable4\_20PerPair

|                                           |          |             |             |    |     |
|-------------------------------------------|----------|-------------|-------------|----|-----|
| GO:0007088                                | 3.01E-06 | 12.8432356  | 0.62722303  | 7  | 88  |
| regulation of mitosis                     |          |             |             |    |     |
| GO:0051783                                | 3.01E-06 | 12.8432356  | 0.62722303  | 7  | 88  |
| regulation of nuclear division            |          |             |             |    |     |
| GO:0007017                                | 4.26E-06 | 5.309473684 | 2.80112103  | 13 | 393 |
| microtubule-based process                 |          |             |             |    |     |
| GO:0000910                                | 4.69E-06 | 11.95246648 | 0.669988236 | 7  | 94  |
| cytokinesis                               |          |             |             |    |     |
| GO:0010948                                | 5.39E-06 | 11.68223315 | 0.684243305 | 7  | 96  |
| negative regulation of cell cycle process |          |             |             |    |     |

STable4\_20PerPair

|                                        |          |             |             |    |     |            |
|----------------------------------------|----------|-------------|-------------|----|-----|------------|
| GO:0000086                             | 8.57E-06 | 8.8         | 1.026364957 | 8  | 144 | G2/M       |
| transition of mitotic cell cycle       |          |             |             |    |     |            |
| GO:0000075                             | 8.69E-06 | 6.542454579 | 1.724863331 | 10 | 242 | cell       |
| cycle checkpoint                       |          |             |             |    |     |            |
| GO:0031577                             | 1.15E-05 | 19.73386652 | 0.299356446 | 5  | 42  |            |
| spindle checkpoint                     |          |             |             |    |     |            |
| GO:0051488                             | 1.21E-05 | 107.58      | 0.049892741 | 3  | 7   | activation |
| of anaphase-promoting complex activity |          |             |             |    |     |            |
| GO:0050000                             | 1.33E-05 | 34.06060606 | 0.149678223 | 4  | 21  |            |
| chromosome localization                |          |             |             |    |     |            |

STable4\_20PerPair

GO:0051303 1.33E-05 34.06060606 0.149678223 4 21  
 establishment of chromosome localization

GO:0051329 1.59E-05 5.023564991 2.701335548 12 379  
 interphase of mitotic cell cycle

GO:0051325 1.95E-05 4.913582418 2.758355823 12 387  
 interphase

Tissue: Heart\_Left\_Ventricle=>Adipose\_Subcutaneous Type: asymmetric

SourceGene: LAD1(ENSG00000159166.9) ladinin 1

STable4\_20PerPair

TargetGeneSet: CDCA8 PGCP1 ASPM KIF14 CENPF RAB3GAP2 TCEB1P21  
 BUB1 IHH PASK KIF15 RP11 TACC3 CENPE FBXO4 CTA C9orf174  
 ZWINT CEP55 HELLS MKI67 CDCA5 CDCA3 RNASE13 CBLN3 BUB1B KIAA0101  
 WDR73 PKMYT1 SHCBP1 ORC6 FAM64A AURKB TOP2A KIF18B PCTP NDC80  
 UHRF1 ZNF490 DHPS STX10 PARP4P3 CLTCL1 CDC45 GTSE1 MBTPS2 FAM122C MT

| GOBPID                           | Pvalue   | OddsRatio | ExpCount    | Count       | Size | Term     |
|----------------------------------|----------|-----------|-------------|-------------|------|----------|
| GO:0000280                       | 2.36E-18 |           | 35.94249249 | 0.896131756 | 17   | 350      |
| nuclear division                 |          |           |             |             |      |          |
| GO:0007067                       | 2.36E-18 |           | 35.94249249 | 0.896131756 | 17   | 350      |
| mitosis                          |          |           |             |             |      |          |
| GO:0000087                       | 3.81E-18 |           | 34.86982507 | 0.92173552  | 17   | 360 M    |
| phase of mitotic cell cycle      |          |           |             |             |      |          |
| GO:0048285                       | 6.05E-18 |           | 33.85793201 | 0.947339284 | 17   | 370      |
| organelle fission                |          |           |             |             |      |          |
| GO:0051301                       | 1.06E-13 |           | 21.80726025 | 1.157290153 | 15   | 452 cell |
| division                         |          |           |             |             |      |          |
| GO:0000236                       | 3.44E-11 |           | 51.36408419 | 0.217631998 | 8    | 85       |
| mitotic prometaphase             |          |           |             |             |      |          |
| GO:0007059                       | 1.93E-09 |           | 29.84743992 | 0.358452702 | 8    | 140      |
| chromosome segregation           |          |           |             |             |      |          |
| GO:0010564                       | 4.09E-09 |           | 14.70900935 | 1.059995848 | 11   | 414      |
| regulation of cell cycle process |          |           |             |             |      |          |



STable4\_20PerPair

|                                  |          |             |             |    |     |      |
|----------------------------------|----------|-------------|-------------|----|-----|------|
| GO:0007017                       | 3.57E-08 | 13.56832028 | 1.006227943 | 10 | 393 |      |
| microtubule-based process        |          |             |             |    |     |      |
| GO:0000075                       | 1.40E-07 | 16.71676982 | 0.6196111   | 8  | 242 | cell |
| cycle checkpoint                 |          |             |             |    |     |      |
| GO:0000819                       | 1.98E-07 | 47.76263298 | 0.133139575 | 5  | 52  |      |
| sister chromatid segregation     |          |             |             |    |     |      |
| GO:0071156                       | 2.72E-07 | 15.25646552 | 0.675939381 | 8  | 264 |      |
| regulation of cell cycle arrest  |          |             |             |    |     |      |
| GO:0007346                       | 7.75E-07 | 13.20303916 | 0.775794063 | 8  | 303 |      |
| regulation of mitotic cell cycle |          |             |             |    |     |      |
| GO:0007093                       | 1.29E-06 | 20.78243997 | 0.355892326 | 6  | 139 |      |
| mitotic cell cycle checkpoint    |          |             |             |    |     |      |
| GO:0007051                       | 1.74E-06 | 29.87291667 | 0.204830116 | 5  | 80  |      |
| spindle organization             |          |             |             |    |     |      |
| GO:0051640                       | 2.02E-06 | 19.18010753 | 0.384056467 | 6  | 150 |      |
| organelle localization           |          |             |             |    |     |      |
| GO:0007050                       | 3.38E-06 | 10.73875251 | 0.944778908 | 8  | 369 | cell |
| cycle arrest                     |          |             |             |    |     |      |

STable4\_20PerPair

|                                          |          |             |             |   |     |
|------------------------------------------|----------|-------------|-------------|---|-----|
| GO:0034508                               | 5.52E-06 | 115.5320856 | 0.03584527  | 3 | 14  |
| centromere complex assembly              |          |             |             |   |     |
| GO:0000070                               | 7.10E-06 | 38.7043771  | 0.125458446 | 4 | 49  |
| mitotic sister chromatid segregation     |          |             |             |   |     |
| GO:0051310                               | 1.03E-05 | 90.75630252 | 0.0435264   | 3 | 17  |
| metaphase plate congression              |          |             |             |   |     |
| GO:0045786                               | 1.17E-05 | 8.992846234 | 1.118884506 | 8 | 437 |
| negative regulation of cell cycle        |          |             |             |   |     |
| GO:0050000                               | 1.99E-05 | 70.56862745 | 0.053767905 | 3 | 21  |
| chromosome localization                  |          |             |             |   |     |
| GO:0051303                               | 1.99E-05 | 70.56862745 | 0.053767905 | 3 | 21  |
| establishment of chromosome localization |          |             |             |   |     |

Tissue: Heart\_Left\_Ventricle=>Adipose\_Subcutaneous Type: asymmetric

SourceGene: NT5C2(ENSG00000076685.13) "5'-nucleotidase, cytosolic II"

TargetGeneSet: PUSL1 MIB2 RP11 PGCP1 SLAMF8 DUSP27 NLRC4 FBXO48  
TCEB1P21 RHOQP2 NEB XIRP2 KBTBD10 TTN MYL1 TMEM169 CMYA5  
TMEM232 LMOD2 MYOM2 ENDOG TMEM141 FAS NRAP C11orf73 DDN  
LINC00464 BUB1B RBFox1 ATP2A1 MYLPF MYH2 MYH1 CCR10 PSMA8 RYR1  
CKM SNORD33 MYBPC2 EEF1A2 PI4KAP2 SMPX HMGNI2P26

| GOBPID                          | Pvalue   | OddsRatio | Stable4_20PerPair<br>ExpCount | Count       | Size | Term |
|---------------------------------|----------|-----------|-------------------------------|-------------|------|------|
| GO:0006936                      | 1.28E-11 |           | 34.43474042                   | 0.46308214  | 10   | 239  |
| muscle contraction              |          |           |                               |             |      |      |
| GO:0003012                      | 3.70E-11 |           | 30.74435764                   | 0.515396858 | 10   | 266  |
| muscle system process           |          |           |                               |             |      |      |
| GO:0030049                      | 1.03E-08 |           | 92.00127877                   | 0.075565705 | 5    | 39   |
| muscle filament sliding         |          |           |                               |             |      |      |
| GO:0033275                      | 1.03E-08 |           | 92.00127877                   | 0.075565705 | 5    | 39   |
| actin-myosin filament sliding   |          |           |                               |             |      |      |
| GO:0070252                      | 1.52E-08 |           | 84.52408931                   | 0.081378451 | 5    | 42   |
| actin-mediated cell contraction |          |           |                               |             |      |      |
| GO:0030048                      | 8.73E-08 |           | 57.84621578                   | 0.114317348 | 5    | 59   |
| actin filament-based movement   |          |           |                               |             |      |      |
| GO:0006941                      | 2.95E-07 |           | 44.57453416                   | 0.145318663 | 5    | 75   |
| striated muscle contraction     |          |           |                               |             |      |      |

Tissue: Adipose\_Subcutaneous=>Heart\_Left\_Ventricle Type: asymmetric  
SourceGene: RP11-439A17.9(ENSG00000233029.2)  
TargetGeneSet: AURKAIP1 SPEN ARHGEF19 MINOS1 RP11 ZSCAN20  
MRPS15 FAM151A RPL5 FAM212B LYSMD1 SNRPE SRGAP3 ZNF513 NFU1 COX5B TSPO  
SF3B3 EEF1B2 CAPN7 UBE2E1 RPL18AP7 GORASP1 LIMD1 ZNF717 YEATS2 MRAP  
CNO NDUFC1 COX7C ARAP3 NSD1 TMEM14B CCNC HEBP2 AGPAT4 MRPS24 SRI  
TECPR1 ZKSCAN5 FIS1 TNPO3 C7orf73 PRKDC RPS20 C8orf59 RPL30 COX6C  
TMEM65 SPATC1 RPL8 C9orf46 RPS6 ALDH1A1 POLR3A RPL27A NDUFS3 FAU  
RPS25 PFDN5 C12orf51 GCN1L1 GTF3A MED4 MRPL52 U2 SLIRP MGA  
TPM1 RPL4 MYO9A NDUFAB1 FAM65A 7SK WDR81 METTL16 PSMB6 GABARAP CTD  
RPL26 TMEM220 TRIM16 RPS7P1 RPL23A CCL2 RPL19 DCAF7 NDUFV2 TXNL4A  
ATP5D OAZ1 C19orf70 CDC37 C19orf53 NDUFB7 BRD4 MAST3  
COX6B1 RPS11 ZNF808 ZNF341 PLCG1 NCOA3 APOL2 TNRC6B PPARA PNPLA4  
EEF1B2P3 FUNDC1 COX7B BCORL1  
GOBPID Pvalue OddsRatio ExpCount Count Size Term

Stable4\_20PerPair

|            |                      |                                                                     |                   |        |
|------------|----------------------|---------------------------------------------------------------------|-------------------|--------|
| GO:0006414 | 3.69274637378678e-15 | 28.1420118343195                                                    | 0.668465850114179 |        |
| 14         | 105                  | translational elongation                                            |                   |        |
| GO:0006415 | 1.50203658113874e-14 | 30.1286919831224                                                    | 0.579337070098955 |        |
| 13         | 91                   | translational termination                                           |                   |        |
| GO:0006614 | 1.01827296410455e-13 | 25.518849752339                                                     | 0.668465850114179 | 13     |
| 105        |                      | SRP-dependent cotranslational protein targeting to membrane         |                   |        |
| GO:0006613 | 1.15469488928884e-13 | 25.2426840887437                                                    | 0.674832191543838 |        |
| 13         | 106                  | cotranslational protein targeting to membrane                       |                   |        |
| GO:0045047 | 1.15469488928884e-13 | 25.2426840887437                                                    | 0.674832191543838 |        |
| 13         | 106                  | protein targeting to ER                                             |                   |        |
| GO:0072599 | 1.15469488928884e-13 | 25.2426840887437                                                    | 0.674832191543838 |        |
| 13         | 106                  | establishment of protein localization to endoplasmic reticulum      |                   |        |
| GO:0070972 | 4.74744411074256e-13 | 22.3389993972272                                                    | 0.751228288699744 |        |
| 13         | 118                  | protein localization to endoplasmic reticulum                       |                   |        |
| GO:0000184 | 5.30249188814586e-13 | 22.1267016957249                                                    | 0.757594630129403 |        |
| 13         | 119                  | nuclear-transcribed mRNA catabolic process, nonsense-mediated decay |                   |        |
| GO:0019080 | 1.15437991848963e-11 | 16.9577141808842                                                    | 0.961317555878486 |        |
| 13         | 151                  | viral genome expression                                             |                   |        |
| GO:0019083 | 1.15437991848963e-11 | 16.9577141808842                                                    | 0.961317555878486 |        |
| 13         | 151                  | viral transcription                                                 |                   |        |
| GO:0006413 | 1.25589680093365e-11 | 16.8345323741007                                                    | 0.967683897308145 |        |
| 13         | 152                  | translational initiation                                            |                   |        |
| GO:0006612 | 1.36550618939728e-11 | 16.7131103074141                                                    | 0.974050238737804 |        |
| 13         | 153                  | protein targeting to membrane                                       |                   |        |
| GO:0043624 | 1.36550618939728e-11 | 16.7131103074141                                                    | 0.974050238737804 |        |
| 13         | 153                  | cellular protein complex disassembly                                |                   |        |
| GO:0043241 | 2.05652439826081e-11 | 16.1311217808817                                                    | 1.0058819458861   | 13     |
| 158        |                      | protein complex disassembly                                         |                   |        |
| GO:0022904 | 2.13412240890585e-11 | 22.8052287581699                                                    | 0.611168777247249 |        |
| 11         | 96                   | respiratory electron transport chain                                |                   |        |
| GO:0072594 | 3.82294072612714e-11 | 13.385020242915                                                     | 1.2987336516504   | 14 204 |
|            |                      | establishment of protein localization to organelle                  |                   |        |
| GO:0000956 | 4.82346741374753e-11 | 14.9820675105485                                                    | 1.07591170161235  |        |
| 13         | 169                  | nuclear-transcribed mRNA catabolic process                          |                   |        |
| GO:0034623 | 6.96470222143446e-11 | 14.5116754461829                                                    | 1.10774340876064  |        |
| 13         | 174                  | cellular macromolecular complex disassembly                         |                   |        |
| GO:0006402 | 9.26646282702262e-11 | 14.1558879938627                                                    | 1.13320877447927  |        |
| 13         | 178                  | mRNA catabolic process                                              |                   |        |
| GO:0032984 | 9.94107155620554e-11 | 14.0696202531646                                                    | 1.13957511590893  |        |
| 13         | 179                  | macromolecular complex disassembly                                  |                   |        |
| GO:0019058 | 2.00447753500612e-10 | 11.697270471464                                                     | 1.47062487025119  | 14     |
| 231        |                      | viral infectious cycle                                              |                   |        |
| GO:0006401 | 5.37465029970302e-10 | 12.1420754219409                                                    | 1.30509999308006  |        |
| 13         | 205                  | RNA catabolic process                                               |                   |        |
| GO:0022900 | 8.17322226875273e-10 | 15.7177556960755                                                    | 0.853089751574286 |        |
| 11         | 134                  | electron transport chain                                            |                   |        |
| GO:0022415 | 9.47557506538276e-10 | 10.2971648947259                                                    | 1.6552487717113   | 14     |
| 260        |                      | viral reproductive process                                          |                   |        |
| GO:0045333 | 1.52063803221109e-09 | 14.7495994722458                                                    | 0.904020483011556 |        |
| 11         | 142                  | cellular respiration                                                |                   |        |
| GO:0016032 | 3.06268020579448e-09 | 7.2726574500768                                                     | 2.87121998477614  | 17     |
| 451        |                      | viral reproduction                                                  |                   |        |
| GO:0006605 | 6.45100649366348e-09 | 6.89522975929978                                                    | 3.01764583765829  |        |
| 17         | 474                  | protein targeting                                                   |                   |        |
| GO:0071845 | 2.76755982344779e-08 | 8.55453314026811                                                    | 1.80804096602311  |        |
| 13         | 284                  | cellular component disassembly at cellular level                    |                   |        |
| GO:0022411 | 3.26461497070382e-08 | 8.42771001150748                                                    | 1.83350633174175  |        |
| 13         | 288                  | cellular component disassembly                                      |                   |        |
| GO:0033365 | 2.75047658881905e-07 | 5.91263539953496                                                    | 3.01127949622863  |        |
| 15         | 473                  | protein localization to organelle                                   |                   |        |
| GO:0006119 | 1.7511410088196e-06  | 19.1954382826476                                                    | 0.369247802920213 |        |
| 6          | 58                   | oxidative phosphorylation                                           |                   |        |
| GO:0006120 | 3.02300201070875e-06 | 26.5628476084538                                                    | 0.229188291467718 |        |

Stable4\_20PerPair

|                  |                                            |                                                                     |                  |                   |          |                   |          |                   |         |      |
|------------------|--------------------------------------------|---------------------------------------------------------------------|------------------|-------------------|----------|-------------------|----------|-------------------|---------|------|
| 5                | 36                                         | mitochondrial electron transport, NADH to ubiquinone                |                  |                   |          |                   |          |                   |         |      |
| GO:0015980       |                                            | 3.87136211202597e-06                                                | 6.45199366032699 |                   |          |                   |          | 1.95446681890527  |         |      |
| 11               | 307                                        | energy derivation by oxidation of organic compounds                 |                  |                   |          |                   |          |                   |         |      |
| GO:0042773       |                                            | 1.16400533956989e-05                                                | 19.5908593322386 |                   |          |                   |          | 0.299218047193966 |         |      |
| 5                | 47                                         | ATP synthesis coupled electron transport                            |                  |                   |          |                   |          |                   |         |      |
| GO:0042775       |                                            | 1.16400533956989e-05                                                | 19.5908593322386 |                   |          |                   |          | 0.299218047193966 |         |      |
| 5                | 47                                         | mitochondrial ATP synthesis coupled electron transport              |                  |                   |          |                   |          |                   |         |      |
| GO:0006091       |                                            | 1.66141261505467e-05                                                | 5.02752403846154 |                   |          |                   |          | 2.72479413189399  |         |      |
| 12               | 428                                        | generation of precursor metabolites and energy                      |                  |                   |          |                   |          |                   |         |      |
| Tissue:          | Adipose_Subcutaneous=>Heart_Left_Ventricle |                                                                     |                  |                   |          |                   |          | Type:             | cluster |      |
| SourceGene:      | RP11-439A17.9(ENSG00000233029.2)           |                                                                     |                  |                   |          |                   |          |                   |         |      |
| TargetGeneSet:   | AURKAIP1                                   | SPEN                                                                | ARHGEF19         | MINOS1            | RP11     | ZSCAN20           |          |                   |         |      |
| MRPS15           | FAM151A                                    | RPL5                                                                | FAM212B          | LYSMD1            | SNRPE    | SRGAP3            | ZNF513   | NFU1              | COX5B   | TSPO |
| SF3B3            | EEF1B2                                     | CAPN7                                                               | UBE2E1           | RPL18AP7          |          | GORASP1           | LIMD1    | ZNF717            | YEATS2  | MRAP |
| CNO              | NDUFC1                                     | COX7C                                                               | ARAP3            | NSD1              | TMEM14B  | CCNC              | HEBP2    | AGPAT4            | MRPS24  | SRI  |
| TECPR1           | ZKSCAN5                                    | FIS1                                                                | TNPO3            | C7orf73           | PRKDC    | RPS20             | C8orf59  | RPL30             | COX6C   |      |
| TMEM65           | SPATC1                                     | RPL8                                                                | C9orf46          | RPS6              | ALDH1A1  | POLR3A            | RPL27A   | NDUFS3            | FAU     |      |
| RPS25            | PFDN5                                      | C12orf51                                                            |                  | GCN1L1            | GTF3A    | MED4              | MRPL52   | U2                | SLIRP   | MGA  |
| TPM1             | RPL4                                       | MYO9A                                                               | NDUFAB1          | FAM65A            | 7SK      | WDR81             | METTLL16 | PSMB6             | GABARAP | CTD  |
| RPL26            | TMEM220                                    | TRIM16                                                              | RPS7P1           | RPL23A            | CCL2     | RPL19             | DCAF7    | NDUFV2            | TXNL4A  |      |
| ATP5D            | OAZ1                                       | C19orf70                                                            |                  | CDC37             | C19orf53 |                   | NDUFB7   | BRD4              | MAST3   |      |
| COX6B1           | RPS11                                      | ZNF808                                                              | ZNF341           | PLCG1             | NCOA3    | APOL2             | TNRC6B   | PPARA             | PNPLA4  |      |
| EEF1B2P3         |                                            | FUNDC1                                                              | COX7B            | BCORL1            |          |                   |          |                   |         |      |
| GOBPID           | Pvalue                                     | OddsRatio                                                           | ExpCount         | Count             | Size     | Term              |          |                   |         |      |
| GO:0006414       |                                            | 3.69274637378678e-15                                                | 28.1420118343195 |                   |          | 0.668465850114179 |          |                   |         |      |
| 14               | 105                                        | translational elongation                                            |                  |                   |          |                   |          |                   |         |      |
| GO:0006415       |                                            | 1.50203658113874e-14                                                | 30.1286919831224 |                   |          | 0.579337070098955 |          |                   |         |      |
| 13               | 91                                         | translational termination                                           |                  |                   |          |                   |          |                   |         |      |
| GO:0006614       |                                            | 1.01827296410455e-13                                                | 25.518849752339  | 0.668465850114179 |          |                   |          |                   | 13      |      |
| 105              |                                            | SRP-dependent cotranslational protein targeting to membrane         |                  |                   |          |                   |          |                   |         |      |
| GO:0006613       |                                            | 1.15469488928884e-13                                                | 25.2426840887437 |                   |          | 0.674832191543838 |          |                   |         |      |
| 13               | 106                                        | cotranslational protein targeting to membrane                       |                  |                   |          |                   |          |                   |         |      |
| GO:0045047       |                                            | 1.15469488928884e-13                                                | 25.2426840887437 |                   |          | 0.674832191543838 |          |                   |         |      |
| 13               | 106                                        | protein targeting to ER                                             |                  |                   |          |                   |          |                   |         |      |
| GO:0072599       |                                            | 1.15469488928884e-13                                                | 25.2426840887437 |                   |          | 0.674832191543838 |          |                   |         |      |
| 13               | 106                                        | establishment of protein localization to endoplasmic reticulum      |                  |                   |          |                   |          |                   |         |      |
| GO:0070972       |                                            | 4.74744411074256e-13                                                | 22.3389993972272 |                   |          | 0.751228288699744 |          |                   |         |      |
| 13               | 118                                        | protein localization to endoplasmic reticulum                       |                  |                   |          |                   |          |                   |         |      |
| GO:0000184       |                                            | 5.30249188814586e-13                                                | 22.1267016957249 |                   |          | 0.757594630129403 |          |                   |         |      |
| 13               | 119                                        | nuclear-transcribed mRNA catabolic process, nonsense-mediated decay |                  |                   |          |                   |          |                   |         |      |
| GO:0019080       |                                            | 1.15437991848963e-11                                                | 16.9577141808842 |                   |          | 0.961317555878486 |          |                   |         |      |
| 13               | 151                                        | viral genome expression                                             |                  |                   |          |                   |          |                   |         |      |
| GO:0019083       |                                            | 1.15437991848963e-11                                                | 16.9577141808842 |                   |          | 0.961317555878486 |          |                   |         |      |
| 13               | 151                                        | viral transcription                                                 |                  |                   |          |                   |          |                   |         |      |
| GO:0006413       |                                            | 1.25589680093365e-11                                                | 16.8345323741007 |                   |          | 0.967683897308145 |          |                   |         |      |
| 13               | 152                                        | translational initiation                                            |                  |                   |          |                   |          |                   |         |      |
| GO:0006612       |                                            | 1.36550618939728e-11                                                | 16.7131103074141 |                   |          | 0.974050238737804 |          |                   |         |      |
| 13               | 153                                        | protein targeting to membrane                                       |                  |                   |          |                   |          |                   |         |      |
| GO:0043624       |                                            | 1.36550618939728e-11                                                | 16.7131103074141 |                   |          | 0.974050238737804 |          |                   |         |      |
| 13               | 153                                        | cellular protein complex disassembly                                |                  |                   |          |                   |          |                   |         |      |
| GO:0043241       |                                            | 2.05652439826081e-11                                                | 16.1311217808817 |                   |          | 1.0058819458861   | 13       |                   |         |      |
| 158              |                                            | protein complex disassembly                                         |                  |                   |          |                   |          |                   |         |      |
| GO:0022904       |                                            | 2.13412240890585e-11                                                | 22.8052287581699 |                   |          | 0.611168777247249 |          |                   |         |      |
| 11               | 96                                         | respiratory electron transport chain                                |                  |                   |          |                   |          |                   |         |      |
| GO:0072594       |                                            | 3.82294072612714e-11                                                | 13.385020242915  | 1.2987336516504   | 14       | 204               |          |                   |         |      |
| establishment of |                                            | protein localization to organelle                                   |                  |                   |          |                   |          |                   |         |      |
| GO:0000956       |                                            | 4.82346741374753e-11                                                | 14.9820675105485 |                   |          | 1.07591170161235  |          |                   |         |      |
| 13               | 169                                        | nuclear-transcribed mRNA catabolic process                          |                  |                   |          |                   |          |                   |         |      |
| GO:0034623       |                                            | 6.96470222143446e-11                                                | 14.5116754461829 |                   |          | 1.10774340876064  |          |                   |         |      |
| 13               | 174                                        | cellular macromolecular complex disassembly                         |                  |                   |          |                   |          |                   |         |      |
| GO:0006402       |                                            | 9.26646282702262e-11                                                | 14.1558879938627 |                   |          | 1.13320877447927  |          |                   |         |      |
| 13               | 178                                        | mRNA catabolic process                                              |                  |                   |          |                   |          |                   |         |      |
| GO:0032984       |                                            | 9.94107155620554e-11                                                | 14.0696202531646 |                   |          | 1.13957511590893  |          |                   |         |      |

STable4\_20PerPair

|                                                    |        |                                                                     |                  |                   |          |                   |             |         |             |
|----------------------------------------------------|--------|---------------------------------------------------------------------|------------------|-------------------|----------|-------------------|-------------|---------|-------------|
| 13                                                 | 179    | macromolecular complex disassembly                                  |                  |                   |          |                   |             |         |             |
| GO:0019058                                         |        | 2.00447753500612e-10                                                | 11.697270471464  | 1.47062487025119  |          |                   | 14          |         |             |
| 231                                                |        | viral infectious cycle                                              |                  |                   |          |                   |             |         |             |
| GO:0006401                                         |        | 5.37465029970302e-10                                                | 12.1420754219409 | 1.30509999308006  |          |                   |             |         |             |
| 13                                                 | 205    | RNA catabolic process                                               |                  |                   |          |                   |             |         |             |
| GO:0022900                                         |        | 8.17322226875273e-10                                                | 15.7177556960755 | 0.853089751574286 |          |                   |             |         |             |
| 11                                                 | 134    | electron transport chain                                            |                  |                   |          |                   |             |         |             |
| GO:0022415                                         |        | 9.47557506538276e-10                                                | 10.2971648947259 | 1.6552487717113   |          |                   | 14          |         |             |
| 260                                                |        | viral reproductive process                                          |                  |                   |          |                   |             |         |             |
| GO:0045333                                         |        | 1.52063803221109e-09                                                | 14.7495994722458 | 0.904020483011556 |          |                   |             |         |             |
| 11                                                 | 142    | cellular respiration                                                |                  |                   |          |                   |             |         |             |
| GO:0016032                                         |        | 3.06268020579448e-09                                                | 7.2726574500768  | 2.87121998477614  |          |                   | 17          |         |             |
| 451                                                |        | viral reproduction                                                  |                  |                   |          |                   |             |         |             |
| GO:0006605                                         |        | 6.45100649366348e-09                                                | 6.89522975929978 | 3.01764583765829  |          |                   |             |         |             |
| 17                                                 | 474    | protein targeting                                                   |                  |                   |          |                   |             |         |             |
| GO:0071845                                         |        | 2.76755982344779e-08                                                | 8.55453314026811 | 1.80804096602311  |          |                   |             |         |             |
| 13                                                 | 284    | cellular component disassembly at cellular level                    |                  |                   |          |                   |             |         |             |
| GO:0022411                                         |        | 3.26461497070382e-08                                                | 8.42771001150748 | 1.83350633174175  |          |                   |             |         |             |
| 13                                                 | 288    | cellular component disassembly                                      |                  |                   |          |                   |             |         |             |
| GO:0033365                                         |        | 2.75047658881905e-07                                                | 5.91263539953496 | 3.01127949622863  |          |                   |             |         |             |
| 15                                                 | 473    | protein localization to organelle                                   |                  |                   |          |                   |             |         |             |
| GO:0006119                                         |        | 1.7511410088196e-06                                                 | 19.1954382826476 | 0.369247802920213 |          |                   |             |         |             |
| 6                                                  | 58     | oxidative phosphorylation                                           |                  |                   |          |                   |             |         |             |
| GO:0006120                                         |        | 3.02300201070875e-06                                                | 26.5628476084538 | 0.229188291467718 |          |                   |             |         |             |
| 5                                                  | 36     | mitochondrial electron transport, NADH to ubiquinone                |                  |                   |          |                   |             |         |             |
| GO:0015980                                         |        | 3.87136211202597e-06                                                | 6.45199366032699 | 1.95446681890527  |          |                   |             |         |             |
| 11                                                 | 307    | energy derivation by oxidation of organic compounds                 |                  |                   |          |                   |             |         |             |
| GO:0042773                                         |        | 1.16400533956989e-05                                                | 19.5908593322386 | 0.299218047193966 |          |                   |             |         |             |
| 5                                                  | 47     | ATP synthesis coupled electron transport                            |                  |                   |          |                   |             |         |             |
| GO:0042775                                         |        | 1.16400533956989e-05                                                | 19.5908593322386 | 0.299218047193966 |          |                   |             |         |             |
| 5                                                  | 47     | mitochondrial ATP synthesis coupled electron transport              |                  |                   |          |                   |             |         |             |
| GO:0006091                                         |        | 1.66141261505467e-05                                                | 5.02752403846154 | 2.72479413189399  |          |                   |             |         |             |
| 12                                                 | 428    | generation of precursor metabolites and energy                      |                  |                   |          |                   |             |         |             |
| Tissue: Heart_Left_Ventricle=>Adipose_Subcutaneous |        |                                                                     |                  |                   |          | Type: asymmetric  |             |         |             |
| SourceGene:                                        |        | RP11-655M14.13(ENSG00000255318.1)                                   |                  |                   |          |                   |             |         |             |
| TargetGeneSet:                                     | CSMD2  | RPS8                                                                | RPL5             | RP11              | SRGAP2P2 | PSMB4             | RPS7        | NFU1    |             |
| ANKRD36                                            | BRK1   | RPL15                                                               | RAD54L2          | KCTD6             | ZBTB20   | GYG1              | MRPS18C     | ADH5    | SMARCA5-AS1 |
| RPS3A                                              | CTD    | BTF3                                                                | SKP1             | PCDHGA4           | CTB      | MSX2              | CUTA        | WDR11   | ABRACL      |
| RPS3AP26                                           |        | BRAF                                                                | ZNF484           | C10orf31          |          | ADRA2A            | RPS24       | RPS3AP5 | DNMBP-AS1   |
| TMEM126B                                           |        | IFT46                                                               | PHB2             | MLL4              | RPL6     | RPSAP54           | STARD13-AS1 | ESD     | MED4        |
| PSMA3                                              | SQRDL  | RPS3AP6                                                             | FAM108C1         |                   | ADCY7    | KARS              | RPL26       | STX8    | RPS7P1      |
| RPS7P11                                            | TUBD1  | PSMG2                                                               | CHMP4B           |                   |          |                   |             |         |             |
| GOBPID                                             | Pvalue | OddsRatio                                                           | ExpCount         | Count             | Size     | Term              |             |         |             |
| GO:0006415                                         |        | 1.45666516821016e-10                                                | 41.8459291712304 |                   |          | 0.258182824718013 |             |         |             |
| 8                                                  | 91     | translational termination                                           |                  |                   |          |                   |             |         |             |
| GO:0006414                                         |        | 4.64438735855612e-10                                                | 35.7713214620431 |                   |          | 0.297903259290015 |             |         |             |
| 8                                                  | 105    | translational elongation                                            |                  |                   |          |                   |             |         |             |
| GO:0006614                                         |        | 4.64438735855612e-10                                                | 35.7713214620431 |                   |          | 0.297903259290015 |             |         |             |
| 8                                                  | 105    | SRP-dependent cotranslational protein targeting to membrane         |                  |                   |          |                   |             |         |             |
| GO:0006613                                         |        | 5.01328235068794e-10                                                | 35.4038342609771 |                   |          | 0.300740433188015 |             |         |             |
| 8                                                  | 106    | cotranslational protein targeting to membrane                       |                  |                   |          |                   |             |         |             |
| GO:0045047                                         |        | 5.01328235068794e-10                                                | 35.4038342609771 |                   |          | 0.300740433188015 |             |         |             |
| 8                                                  | 106    | protein targeting to ER                                             |                  |                   |          |                   |             |         |             |
| GO:0072599                                         |        | 5.01328235068794e-10                                                | 35.4038342609771 |                   |          | 0.300740433188015 |             |         |             |
| 8                                                  | 106    | establishment of protein localization to endoplasmic reticulum      |                  |                   |          |                   |             |         |             |
| GO:0070972                                         |        | 1.18662231122188e-09                                                | 31.5151515151515 |                   |          | 0.334786519964016 |             |         |             |
| 8                                                  | 118    | protein localization to endoplasmic reticulum                       |                  |                   |          |                   |             |         |             |
| GO:0000184                                         |        | 1.26955061819192e-09                                                | 31.2290472290472 |                   |          | 0.337623693862016 |             |         |             |
| 8                                                  | 119    | nuclear-transcribed mRNA catabolic process, nonsense-mediated decay |                  |                   |          |                   |             |         |             |
| GO:0019080                                         |        | 8.41804379915956e-09                                                | 24.1864801864802 |                   |          | 0.428413258598021 |             |         |             |
| 8                                                  | 151    | viral genome expression                                             |                  |                   |          |                   |             |         |             |
| GO:0019083                                         |        | 8.41804379915956e-09                                                | 24.1864801864802 |                   |          | 0.428413258598021 |             |         |             |
| 8                                                  | 151    | viral transcription                                                 |                  |                   |          |                   |             |         |             |

STable4\_20PerPair

|                                                    |                          |                                                    |                    |   |
|----------------------------------------------------|--------------------------|----------------------------------------------------|--------------------|---|
| GO:0006413                                         | 8.86757287242486e-09     | 24.016835016835                                    | 0.431250432496021  | 8 |
| 152                                                | translational initiation |                                                    |                    |   |
| GO:0006612                                         | 9.33771581822956e-09     | 23.8495297805643                                   | 0.434087606394021  |   |
| 8                                                  | 153                      | protein targeting to membrane                      |                    |   |
| GO:0043624                                         | 9.33771581822956e-09     | 23.8495297805643                                   | 0.434087606394021  |   |
| 8                                                  | 153                      | cellular protein complex disassembly               |                    |   |
| GO:0043241                                         | 1.20261549553799e-08     | 23.0464646464646                                   | 0.448273475884022  |   |
| 8                                                  | 158                      | protein complex disassembly                        |                    |   |
| GO:0000956                                         | 2.03875613063529e-08     | 21.4552983248635                                   | 0.479482388762023  |   |
| 8                                                  | 169                      | nuclear-transcribed mRNA catabolic process         |                    |   |
| GO:0034623                                         | 2.56067776833948e-08     | 20.8017524644031                                   | 0.493668258252024  |   |
| 8                                                  | 174                      | cellular macromolecular complex disassembly        |                    |   |
| GO:0006402                                         | 3.05762649345097e-08     | 20.3065953654189                                   | 0.505016953844025  |   |
| 8                                                  | 178                      | mRNA catabolic process                             |                    |   |
| GO:0032984                                         | 3.19413302749748e-08     | 20.1864256601099                                   | 0.507854127742025  |   |
| 8                                                  | 179                      | macromolecular complex disassembly                 |                    |   |
| GO:0016032                                         | 3.28582059199147e-08     | 11.6416666666667                                   | 1.27956542799806   |   |
| 11                                                 | 451                      | viral reproduction                                 |                    |   |
| GO:0072594                                         | 8.80848819809488e-08     | 17.5807050092764                                   | 0.578783475192028  |   |
| 8                                                  | 204                      | establishment of protein localization to organelle |                    |   |
| GO:0006401                                         | 9.14744595825104e-08     | 17.4902322719582                                   | 0.581620649090028  |   |
| 8                                                  | 205                      | RNA catabolic process                              |                    |   |
| GO:0019058                                         | 2.29018273477018e-07     | 15.4227476559315                                   | 0.655387170438032  |   |
| 8                                                  | 231                      | viral infectious cycle                             |                    |   |
| GO:0022415                                         | 5.63551274443617e-07     | 13.6200096200096                                   | 0.737665213480036  |   |
| 8                                                  | 260                      | viral reproductive process                         |                    |   |
| GO:0071845                                         | 1.0973138698979e-06      | 12.4145805884936                                   | 0.805757387032039  |   |
| 8                                                  | 284                      | cellular component disassembly at cellular level   |                    |   |
| GO:0022411                                         | 1.21888515040308e-06     | 12.2337662337662                                   | 0.81710608262404   |   |
| 8                                                  | 288                      | cellular component disassembly                     |                    |   |
| GO:0033365                                         | 5.50598763044479e-06     | 8.45325969827586                                   | 1.34198325375407   |   |
| 9                                                  | 473                      | protein localization to organelle                  |                    |   |
| GO:0006605                                         | 5.60114799230724e-06     | 8.43447580645161                                   | 1.34482042765207   |   |
| 9                                                  | 474                      | protein targeting                                  |                    |   |
| GO:0006364                                         | 1.06890887301401e-05     | 20.0771604938272                                   | 0.295066085392014  |   |
| 5                                                  | 104                      | rRNA processing                                    |                    |   |
| GO:0016072                                         | 1.40496412678571e-05     | 18.9219576719577                                   | 0.312089128780015  |   |
| 5                                                  | 110                      | rRNA metabolic process                             |                    |   |
| GO:0042274                                         | 1.67934151149249e-05     | 75.7631578947368                                   | 0.0510691301640025 |   |
| 3                                                  | 18                       | ribosomal small subunit biogenesis                 |                    |   |
| GO:0034470                                         | 1.95796569622906e-05     | 12.5620029455081                                   | 0.567434779600028  |   |
| 6                                                  | 200                      | ncRNA processing                                   |                    |   |
| Tissue: Adipose_Subcutaneous=>Heart_Left_Ventricle |                          | Type:                                              | asymmetric         |   |

SourceGene: ST3GAL5(ENSG00000115525.11) "ST3 beta-galactoside  
alpha-2,3-sialyltransferase 5"

STable4\_20PerPair

|                |           |             |         |           |        |          |          |          |          |      |
|----------------|-----------|-------------|---------|-----------|--------|----------|----------|----------|----------|------|
| TargetGeneSet: | RP11      | MRPL20      | DNAJC16 | EIF1AX    | RPRD2  | ILDR2    | TGFB2    | LYPLAL1  |          |      |
| CICP5          | RAB4A     | RPS7        | NBAS    | MRPL33    | MORN2  | UBC      | CCDC142  | SNRNP200 |          |      |
| TNFAIP6        | CIDEC     | HIGD1A      | ADIPOQ  | LETM1     | MRAP   | RPS3A    | NDUFAF2  | MTND5P11 |          |      |
| TMEM14B        | RPS10     | PGM3        | HEBP2   | MAGI2-AS3 |        | ZKSCAN5  | GS1      | MEPCE    | PNPLA8   |      |
| ADCK2          | RPL30     | FBXO32      | FAM49B  | EEF1D     | RPL8   | LURAP1L  | RPS6     | DCTN3    | HABP4    |      |
| TRIM32         | CDK5RAP2  |             | RPL35   | GTF3C4    | UPF2   | DCLRE1C  | TMEM180  | RPLP2    | RPL27A   | FAR1 |
| RP4            | HYLS1     | CACNA1C-IT3 |         | REP15     | RAP1B  | GLIPR1   | RPL18AP3 |          | ANKRD13A |      |
| FAM179B        | MAPK1IP1L |             | VTI1B   | PLDN      | ZFAND6 | C17orf50 |          | RPL19    | C17orf53 |      |
| SRSF1          | SRSF2     | CABYR       | MOB3A   | ALKBH7    | ZNF490 | ZNF829   | SPRED3   | AURKC    | CSR2BP   | RBL1 |
| PCK1           | SMPX      | DYNLT3      | ACSL4   | FAM127A   | EMD    |          |          |          |          |      |

| GOBPID     | Pvalue   | OddsRatio                                                             | ExpCount    | Count       | Size | Term |
|------------|----------|-----------------------------------------------------------------------|-------------|-------------|------|------|
| GO:0006414 | 1.47E-14 |                                                                       | 37.64845293 | 0.443221922 | 12   | 105  |
|            |          | translational elongation                                              |             |             |      |      |
| GO:0000184 | 6.85E-14 |                                                                       | 32.6904444  | 0.502318179 | 12   | 119  |
|            |          | "nuclear-transcribed mRNA catabolic process, nonsense-mediated decay" |             |             |      |      |
| GO:0006415 | 1.07E-13 |                                                                       | 39.3525     | 0.384125666 | 11   | 91   |
|            |          | translational termination                                             |             |             |      |      |
| GO:0006614 | 5.39E-13 |                                                                       | 33.4587234  | 0.443221922 | 11   | 105  |
|            |          | SRP-dependent cotranslational protein targeting to membrane           |             |             |      |      |



| GO ID                                                          | P-value  | Count       | Ratio       | Count | Count | Category |
|----------------------------------------------------------------|----------|-------------|-------------|-------|-------|----------|
| GO:0006613                                                     | 6.00E-13 | 33.10421053 | 0.447443084 | 11    | 106   |          |
| STable4_20PerPair                                              |          |             |             |       |       |          |
| cotranslational protein targeting to membrane                  |          |             |             |       |       |          |
| GO:0045047                                                     | 6.00E-13 | 33.10421053 | 0.447443084 | 11    | 106   |          |
| protein targeting to ER                                        |          |             |             |       |       |          |
| GO:0072599                                                     | 6.00E-13 | 33.10421053 | 0.447443084 | 11    | 106   |          |
| establishment of protein localization to endoplasmic reticulum |          |             |             |       |       |          |
| GO:0006413                                                     | 1.32E-12 | 24.9271137  | 0.641616497 | 12    | 152   |          |
| translational initiation                                       |          |             |             |       |       |          |
| GO:0070972                                                     | 1.99E-12 | 29.36691589 | 0.498097018 | 11    | 118   |          |
| protein localization to endoplasmic reticulum                  |          |             |             |       |       |          |
| GO:0000956                                                     | 4.68E-12 | 22.20148187 | 0.713376237 | 12    | 169   |          |
| nuclear-transcribed mRNA catabolic process                     |          |             |             |       |       |          |
| GO:0006402                                                     | 8.66E-12 | 20.98450947 | 0.751366687 | 12    | 178   | mRNA     |
| catabolic process                                              |          |             |             |       |       |          |

STable4\_20PerPair

|                                                    |          |             |             |    |     |     |
|----------------------------------------------------|----------|-------------|-------------|----|-----|-----|
| GO:0019080                                         | 3.00E-11 | 22.39285714 | 0.637395336 | 11 | 151 |     |
| viral genome expression                            |          |             |             |    |     |     |
| GO:0019083                                         | 3.00E-11 | 22.39285714 | 0.637395336 | 11 | 151 |     |
| viral transcription                                |          |             |             |    |     |     |
| GO:0006612                                         | 3.46E-11 | 22.0743662  | 0.645837658 | 11 | 153 |     |
| protein targeting to membrane                      |          |             |             |    |     |     |
| GO:0043624                                         | 3.46E-11 | 22.0743662  | 0.645837658 | 11 | 153 |     |
| cellular protein complex disassembly               |          |             |             |    |     |     |
| GO:0072594                                         | 4.30E-11 | 18.10969388 | 0.861116878 | 12 | 204 |     |
| establishment of protein localization to organelle |          |             |             |    |     |     |
| GO:0006401                                         | 4.56E-11 | 18.01459237 | 0.865338039 | 12 | 205 | RNA |
| catabolic process                                  |          |             |             |    |     |     |

STable4\_20PerPair

|                                                           |          |             |             |    |     |
|-----------------------------------------------------------|----------|-------------|-------------|----|-----|
| GO:0043241<br>protein complex disassembly                 | 4.91E-11 | 21.31605442 | 0.666943464 | 11 | 158 |
| GO:0034623<br>cellular macromolecular complex disassembly | 1.39E-10 | 19.20208589 | 0.734482043 | 11 | 174 |
| GO:0032984<br>macromolecular complex disassembly          | 1.89E-10 | 18.62404762 | 0.755587849 | 11 | 179 |
| GO:0019058<br>infectious cycle                            | 2.84E-09 | 14.17       | 0.975088229 | 11 | 231 |
| GO:0033365<br>protein localization to organelle           | 7.35E-09 | 9.040652668 | 1.996609231 | 14 | 473 |
| GO:0006605<br>protein targeting                           | 7.56E-09 | 9.020351526 | 2.000830392 | 14 | 474 |

STable4\_20PerPair

GO:0022415 9.77E-09 12.49405622 1.097501903 11 260  
viral reproductive process

GO:0071845 2.43E-08 11.376337 1.198809771 11 284  
cellular component disassembly at cellular level

GO:0022411 2.81E-08 11.20888087 1.215694416 11 288  
cellular component disassembly

GO:0016032 3.21E-07 7.782622844 1.903743686 12 451  
viral reproduction

Tissue: Heart\_Left\_Ventricle=>Adipose\_Subcutaneous Type: asymmetric  
SourceGene: VDAC1P2(ENSG00000213856.3)  
TargetGeneSet: RP11 TCEB1P21 NEB XIRP2 KBTBD10 TTN MYL1  
KBTBD5 CMYA5 HCG16 RP1 CTB LMOD2 YWHAZP3 DYDC2 OR52E8 CSRP3 MYL2  
THSD1P1 MYH7 CTD ATP2A1 MYH2 MYH1 FOXJ1 TMEM161A CKM  
COX6CP2 PVALB LGALS1 RP13  
GOBPID Pvalue OddsRatio ExpCount Count Size Term  
GO:0006936 6.37191302025124e-12 55.5730434782609 0.314234309044357  
9 239 muscle contraction  
GO:0030049 6.82931318946151e-12 201.384615384615 0.0512767282541001  
6 39 muscle filament sliding  
GO:0033275 6.82931318946151e-12 201.384615384615 0.0512767282541001  
6 39 actin-myosin filament sliding  
GO:0070252 1.09550346103916e-11 184.564102564103 0.0552210919659539  
6 42 actin-mediated cell contraction  
GO:0003012 1.66726778779246e-11 49.6400778210117 0.349733582451041  
9 266 muscle system process  
GO:0030048 9.28670025034424e-11 125.216255442671 0.0775724863331257  
6 59 actin filament-based movement

STable4\_20PerPair

|            |                                       |                  |                     |
|------------|---------------------------------------|------------------|---------------------|
| GO:0006941 | 4.09911483040142e-10                  | 96.0735785953177 | 0.0986090927963463  |
| 6 75       | striated muscle contraction           |                  |                     |
| GO:0030029 | 3.38449798682131e-08                  | 24.0274442538593 | 0.567988374506954   |
| 8 432      | actin filament-based process          |                  |                     |
| GO:0061061 | 5.18891587400419e-07                  | 20.3586235489221 | 0.537748252716075   |
| 7 409      | muscle structure development          |                  |                     |
| GO:0007517 | 1.74331969548227e-06                  | 21.965811965812  | 0.398380734897239   |
| 303        | muscle organ development              |                  | 6                   |
| GO:0007507 | 3.51644406305201e-06                  | 19.3626373626374 | 0.449657463151339   |
| 6 342      | heart development                     |                  |                     |
| GO:0003010 | 9.81137925112146e-06                  | 848.823529411765 | 0.00525915161580513 |
| 2 4        | voluntary skeletal muscle contraction |                  |                     |
| GO:0014721 | 9.81137925112146e-06                  | 848.823529411765 | 0.00525915161580513 |
| 2 4        | twitch skeletal muscle contraction    |                  |                     |
| GO:0048738 | 1.34512757015315e-05                  | 34.4048048048048 | 0.151200608954398   |
| 4 115      | cardiac muscle tissue development     |                  |                     |
| GO:0003015 | 1.3920077546574e-05                   | 34.0952380952381 | 0.152515396858349   |
| 4 116      | heart process                         |                  |                     |
| GO:0060047 | 1.3920077546574e-05                   | 34.0952380952381 | 0.152515396858349   |
| 4 116      | heart contraction                     |                  |                     |

Tissue: Muscle\_Skeletal=>Adipose\_Subcutaneous Type: asymmetric

SourceGene: ARGLU1(ENSG00000134884.8) arginine and glutamate rich 1

STable4\_20PerPair

|                |          |           |         |            |          |          |          |           |          |      |
|----------------|----------|-----------|---------|------------|----------|----------|----------|-----------|----------|------|
| TargetGeneSet: | RP11     | CEP104    | RPL22   | VPS13D     | RP1      | UBR4     | HSPG2    | RPL11     |          |      |
| ARID1A         | EPB41    | PUM1      | KPNA7   | ZBTB80S    | 7SK      | MFI2     | MACF1    | SZT2      | PTPRF    |      |
| KDM4A          | DPH5     | HIPK1     | MRPS21  | ADAR       | ASH1L    | ARHGEF11 |          | DCAF8     | EDEM3    |      |
| LPGAT1         | URB2     | ADAM18    | TTC32   | ASXL2      | SOS1-IT1 |          | CCDC104  | USP34     | AAK1     |      |
| ALMS1          | TET3     | RETSAT    | TMEM131 | HOXD-AS2   |          | NBEAL1   | FARP2    | BRK1      | NR2C2    |      |
| GOLGA4         | ZNF621   | USP19     | USP4    | RNF123     | VPRBP    | RAD54L2  | APPL1    | PCNP      | ZBTB11   |      |
| KPNA1          | CNBP     | H1FX      | EIF4G1  | CTBP1-AS1  |          | NOP14    | DANCR    | WDFY3-AS1 |          |      |
| RPL34          | MAML3    | NIPBL     | CTD     | TAF9       | BDP1     | DMXL1    | RAD50    | AFF4      | HSPA4    |      |
| CTNNA1         | RPS14    | SLC2A3P1  |         | HRH2       | NSD1     | DHX16    | DDX39B   | SRPK1     | ZFAND3   | CUL9 |
| XPO5           | TMEM63B  | KIAA1919  |         | RP3        | C6orf99  | TNRC18   | FBXL18   | PLEKHA8   | TRRAP    | CUX1 |
| COG5           | TNPO3    | MLL3      | POLR3D  | KIAA1967   |          | KAT6A    | RPS20    | NIPAL2    | VPS13B   |      |
| EIF3H          | EIF2C2   | HEATR7A   | KCNV2   | KIAA2026   |          | SNAPC3   | BICD2    | SETX      | BRD3     |      |
| SEC16A         | NOTCH1   | EHMT1     | HK1     | SEC24C     | FUT11    | KIAA0913 |          | TNKS2     | IDE      |      |
| DNMBP-AS1      |          | CHUK      | PPRC1   | GBF1       | EIF6     | PDDC1    | CARS-AS1 |           | RPL27A   |      |
| DNAJC24        | TNKS1BP1 |           | KDM2A   | LRP5       | PPP6R3   | UBE4A    | DDX6     | SRPR      | ERC1     |      |
| SCAF11         | CCDC65   | MLL4      | PFDN5   | ANKRD52    | PPTC7    | ATXN2    | C12orf47 |           | MLXIP    |      |
| SBNO1          | EP400    | ZDHHC20   | DGKH    | MYCBP2-AS1 |          | TEP1     | ARHGEF40 |           | HNRNPC   |      |
| C14orf21       |          | STRN3     | NIN     | EXOC5      | EXD2     | CCNK     | DYNC1H1  | TECPR2    | CDC42BPB |      |
| KIAA0284       |          | CYFIP1    | HERC2   | TYRO3      | MGA      | GANC     | CCNDBP1  | TP53BP1   | USP8     |      |
| CCPG1          | RPS3AP6  | MYO9A     | SIN3A   | SEC11A     | ZNF592   | POLG     | NME3     | ZNF598    | TSC2     | PKD1 |
| PDPK1          | SLX4     | CREBBP    | RPS15A  | SMG1       | GTF3C1   | SRCAP    | RNF40    | RAB43P1   | VPS35    |      |
| LONP2          | ADCY7    | AARS      | ZNF778  | RP13       | ZZEF1    | RAI1     | TOM1L2   | LLGL1     | FLII     |      |
| KIAA0100       |          | RPL23A    | NUFIP2  | TAOK1      | RPL19    | CDK12    | NKIRAS2  | KPNB1     | CLTC     |      |
| DCAF7          | ERN1     | CEP95     | UBE2O   | PGS1       | CSNK1D   | FOXK2    | ZNF236   | NFIC      | ZBTB7A   |      |
| PLIN4          | RANBP3   | KHSRP     | CARM1   | SMARCA4    | C19orf43 |          | BRD4     | UPF1      | ARHGAP35 |      |
| RPS11          | PRR12    | CNOT3     | U2AF2   | ATRN       | RNF24    | RRBP1    | NCOA6    | SOGA1     | RALGAPB  |      |
| STAU1          | ADRM1    | RP4       | ZGPAT   | DNAJC5     | SCAF4    | SON      | CBR3-AS1 |           | AGPAT3   |      |
| UBE2G2         | MCM3AP   | DSTNP1    | ZNF70   | C22orf45   |          | CTA      | SYN3     | EIF3L     | SMCR7L   |      |
| EP300          | TCF20    | ZBED4     | SBF1    | CDKL5      | UXT      | KDM5C    | HUWE1    | GNL3L     | RRAGB    |      |
| FAM123B        | RPS4X    | RBM41     |         |            |          |          |          |           |          |      |
| GOBPID         | Pvalue   | OddsRatio |         | ExpCount   |          | Count    | Size     | Term      |          |      |

STable4\_20PerPair

|                                            |          |             |            |    |     |
|--------------------------------------------|----------|-------------|------------|----|-----|
| GO:0000956                                 | 6.11E-10 | 7.914936525 | 2.52605356 | 17 | 169 |
| nuclear-transcribed mRNA catabolic process |          |             |            |    |     |

|                   |          |             |             |    |     |      |
|-------------------|----------|-------------|-------------|----|-----|------|
| GO:0006402        | 1.37E-09 | 7.467711227 | 2.660577123 | 17 | 178 | mRNA |
| catabolic process |          |             |             |    |     |      |

|                                                                       |          |             |             |    |     |
|-----------------------------------------------------------------------|----------|-------------|-------------|----|-----|
| GO:0000184                                                            | 2.70E-09 | 9.326732673 | 1.778700436 | 14 | 119 |
| "nuclear-transcribed mRNA catabolic process, nonsense-mediated decay" |          |             |             |    |     |

STable4\_20PerPair

|                                                             |          |             |             |    |     |
|-------------------------------------------------------------|----------|-------------|-------------|----|-----|
| GO:0006614                                                  | 5.39E-09 | 9.844666952 | 1.569441561 | 13 | 105 |
| SRP-dependent cotranslational protein targeting to membrane |          |             |             |    |     |

|                                               |          |             |             |    |     |
|-----------------------------------------------|----------|-------------|-------------|----|-----|
| GO:0006613                                    | 6.06E-09 | 9.738121723 | 1.584388624 | 13 | 106 |
| cotranslational protein targeting to membrane |          |             |             |    |     |



STable4\_20PerPair

|                         |          |             |             |    |     |
|-------------------------|----------|-------------|-------------|----|-----|
| GO:0045047              | 6.06E-09 | 9.738121723 | 1.584388624 | 13 | 106 |
| protein targeting to ER |          |             |             |    |     |

|                                                                |          |             |             |    |     |
|----------------------------------------------------------------|----------|-------------|-------------|----|-----|
| GO:0072599                                                     | 6.06E-09 | 9.738121723 | 1.584388624 | 13 | 106 |
| establishment of protein localization to endoplasmic reticulum |          |             |             |    |     |

STable4\_20PerPair

|                          |          |             |             |    |     |
|--------------------------|----------|-------------|-------------|----|-----|
| GO:0006413               | 8.40E-09 | 7.679485783 | 2.271953498 | 15 | 152 |
| translational initiation |          |             |             |    |     |

|                           |          |             |             |    |    |
|---------------------------|----------|-------------|-------------|----|----|
| GO:0006415                | 1.02E-08 | 10.54058079 | 1.360182686 | 12 | 91 |
| translational termination |          |             |             |    |    |

|                   |          |             |            |    |     |     |
|-------------------|----------|-------------|------------|----|-----|-----|
| GO:0006401        | 1.18E-08 | 6.382951994 | 3.06414781 | 17 | 205 | RNA |
| catabolic process |          |             |            |    |     |     |

STable4\_20PerPair

|                      |          |             |             |    |     |
|----------------------|----------|-------------|-------------|----|-----|
| GO:0016570           | 1.35E-08 | 5.576771406 | 3.901183309 | 19 | 261 |
| histone modification |          |             |             |    |     |

|                                 |          |             |             |    |     |
|---------------------------------|----------|-------------|-------------|----|-----|
| GO:0016569                      | 1.95E-08 | 5.439516129 | 3.990865684 | 19 | 267 |
| covalent chromatin modification |          |             |             |    |     |

STable4\_20PerPair

|                                               |          |             |             |    |     |
|-----------------------------------------------|----------|-------------|-------------|----|-----|
| GO:0070972                                    | 2.26E-08 | 8.617874736 | 1.763753373 | 13 | 118 |
| protein localization to endoplasmic reticulum |          |             |             |    |     |

|                                   |          |             |             |    |     |
|-----------------------------------|----------|-------------|-------------|----|-----|
| GO:0033365                        | 4.25E-08 | 4.028082928 | 7.069960556 | 25 | 473 |
| protein localization to organelle |          |             |             |    |     |

STable4\_20PerPair

|                   |          |             |             |    |     |
|-------------------|----------|-------------|-------------|----|-----|
| GO:0006605        | 4.43E-08 | 4.018820182 | 7.084907619 | 25 | 474 |
| protein targeting |          |             |             |    |     |

|                               |          |             |             |    |     |
|-------------------------------|----------|-------------|-------------|----|-----|
| GO:0006612                    | 7.00E-08 | 7.028420828 | 2.286900561 | 14 | 153 |
| protein targeting to membrane |          |             |             |    |     |

|                                                    |          |             |             |    |     |
|----------------------------------------------------|----------|-------------|-------------|----|-----|
| GO:0072594                                         | 7.04E-08 | 5.977446809 | 3.049200747 | 16 | 204 |
| establishment of protein localization to organelle |          |             |             |    |     |

STable4\_20PerPair

|                                             |          |             |             |    |     |
|---------------------------------------------|----------|-------------|-------------|----|-----|
| GO:0034623                                  | 3.47E-07 | 6.096844059 | 2.600788873 | 14 | 174 |
| cellular macromolecular complex disassembly |          |             |             |    |     |

|                            |          |             |             |    |     |
|----------------------------|----------|-------------|-------------|----|-----|
| GO:0022415                 | 3.76E-07 | 4.918915565 | 3.886236247 | 17 | 260 |
| viral reproductive process |          |             |             |    |     |

STable4\_20PerPair

|                        |          |             |             |    |     |
|------------------------|----------|-------------|-------------|----|-----|
| GO:0019058             | 3.87E-07 | 5.216744186 | 3.452771435 | 16 | 231 |
| viral infectious cycle |          |             |             |    |     |

|                         |          |             |             |    |     |
|-------------------------|----------|-------------|-------------|----|-----|
| GO:0019080              | 4.23E-07 | 6.541764832 | 2.257006436 | 13 | 151 |
| viral genome expression |          |             |             |    |     |

STable4\_20PerPair

|                     |          |             |             |    |     |
|---------------------|----------|-------------|-------------|----|-----|
| GO:0019083          | 4.23E-07 | 6.541764832 | 2.257006436 | 13 | 151 |
| viral transcription |          |             |             |    |     |

|                          |          |             |             |    |     |
|--------------------------|----------|-------------|-------------|----|-----|
| GO:0006414               | 4.70E-07 | 8.072184743 | 1.569441561 | 11 | 105 |
| translational elongation |          |             |             |    |     |

|                                    |          |             |             |    |     |
|------------------------------------|----------|-------------|-------------|----|-----|
| GO:0032984                         | 4.91E-07 | 5.909990999 | 2.675524185 | 14 | 179 |
| macromolecular complex disassembly |          |             |             |    |     |



STable4\_20PerPair

|                        |          |             |             |    |     |
|------------------------|----------|-------------|-------------|----|-----|
| GO:0016568             | 1.30E-06 | 3.744066486 | 6.262819182 | 21 | 419 |
| chromatin modification |          |             |             |    |     |

|            |          |             |             |    |     |      |
|------------|----------|-------------|-------------|----|-----|------|
| GO:0006397 | 2.35E-06 | 3.730547628 | 5.963877932 | 20 | 399 | mRNA |
| processing |          |             |             |    |     |      |

STable4\_20PerPair

|                                      |          |             |             |    |     |
|--------------------------------------|----------|-------------|-------------|----|-----|
| GO:0043624                           | 3.18E-06 | 5.879849812 | 2.286900561 | 12 | 153 |
| cellular protein complex disassembly |          |             |             |    |     |

|                             |          |             |             |    |     |
|-----------------------------|----------|-------------|-------------|----|-----|
| GO:0043241                  | 4.45E-06 | 5.676470588 | 2.361635873 | 12 | 158 |
| protein complex disassembly |          |             |             |    |     |

STable4\_20PerPair

GO:0071845 5.81E-06 4.169253731 4.244965746 16 284  
 cellular component disassembly at cellular level

GO:0022411 6.94E-06 4.106764706 4.304753996 16 288  
 cellular component disassembly

Tissue: Muscle\_Skeletal=>Adipose\_Subcutaneous Type: cluster  
 SourceGene: ARGLU1(ENSG00000134884.8)  
 TargetGeneSet: RP11 CEP104 RPL22 VPS13D RP1 UBR4 HSPG2 RPL11  
 ARID1A EPB41 PUM1 KPNA7 ZBTB80S 7SK MFI2 MACF1 SZT2 PTPRF

Stable4\_20PerPair

| GO:0000956 | 17 | 169 | 6.10642257567849e-10 | 7.91493652472891 | 2.52605356030725 |
|------------|----|-----|----------------------|------------------|------------------|
| GO:0006402 | 17 | 178 | 1.36881264877844e-09 | 7.46771122694216 | 2.66057712269047 |
| GO:0000184 | 14 | 119 | 2.7035754699696e-09  | 9.32673267326733 | 1.77870043595599 |
| GO:0006614 | 13 | 105 | 5.39080792717484e-09 | 9.84466695223817 | 1.56944156113764 |
| GO:0006613 | 13 | 106 | 6.06420928503676e-09 | 9.73812172254886 | 1.58438862362466 |
| GO:0045047 | 13 | 106 | 6.06420928503676e-09 | 9.73812172254886 | 1.58438862362466 |
| GO:0072599 | 13 | 106 | 6.06420928503676e-09 | 9.73812172254886 | 1.58438862362466 |
| GO:0006413 | 15 | 152 | 8.40146687823775e-09 | 7.67948578276501 | 2.27195349802782 |
| GO:0006415 | 12 | 91  | 1.02439993812341e-08 | 10.5405807892777 | 1.36018268631929 |
| GO:0006401 | 17 | 205 | 1.1782094541953e-08  | 6.38295199401262 | 3.06414780984015 |
| GO:0016570 | 19 | 261 | 1.35055073605818e-08 | 5.57677140579771 | 3.90118330911356 |
| GO:0016569 | 19 | 267 | 1.95220980776489e-08 | 5.43951612903226 | 3.99086568403571 |
| GO:0070972 | 13 | 118 | 2.26458106688009e-08 | 8.61787473610134 | 1.76375337346896 |
| GO:0033365 | 25 | 473 | 4.24816230312305e-08 | 4.02808292819746 | 7.06996055636288 |
| GO:0006605 | 25 | 474 | 4.42651014331273e-08 | 4.01882018213832 | 7.08490761884991 |
| GO:0006612 | 14 | 153 | 6.99926641472807e-08 | 7.02842082769428 | 2.28690056051484 |
| GO:0072594 | 16 | 204 | 7.03581564956439e-08 | 5.97744680851064 | 3.04920074735312 |

STable4\_20PerPair

|            |                      |                                                  |                    |
|------------|----------------------|--------------------------------------------------|--------------------|
| GO:0034623 | 3.46922599961797e-07 | 6.09684405940594                                 | 2.60078887274237   |
| 14         | 174                  | cellular macromolecular complex disassembly      |                    |
| GO:0022415 | 3.76483983363389e-07 | 4.91891556548173                                 | 3.88623624662653   |
| 17         | 260                  | viral reproductive process                       |                    |
| GO:0019058 | 3.87360169100841e-07 | 5.21674418604651                                 | 3.4527714345028 16 |
| 231        |                      | viral infectious cycle                           |                    |
| GO:0019080 | 4.22788759172526e-07 | 6.54176483186978                                 | 2.25700643554079   |
| 13         | 151                  | viral genome expression                          |                    |
| GO:0019083 | 4.22788759172526e-07 | 6.54176483186978                                 | 2.25700643554079   |
| 13         | 151                  | viral transcription                              |                    |
| GO:0006414 | 4.69793777412849e-07 | 8.07218474312403                                 | 1.56944156113764   |
| 11         | 105                  | translational elongation                         |                    |
| GO:0032984 | 4.90505725544315e-07 | 5.90999099909991                                 | 2.6755241851775 14 |
| 179        |                      | macromolecular complex disassembly               |                    |
| GO:0016568 | 1.29733854344659e-06 | 3.74406648627754                                 | 6.26281918206352   |
| 21         | 419                  | chromatin modification                           |                    |
| GO:0006397 | 2.34560710933339e-06 | 3.73054762802218                                 | 5.96387793232302   |
| 20         | 399                  | mRNA processing                                  |                    |
| GO:0043624 | 3.18160741122279e-06 | 5.87984981226533                                 | 2.28690056051484   |
| 12         | 153                  | cellular protein complex disassembly             |                    |
| GO:0043241 | 4.44707132878579e-06 | 5.67647058823529                                 | 2.36163587294997   |
| 12         | 158                  | protein complex disassembly                      |                    |
| GO:0071845 | 5.81404164814309e-06 | 4.16925373134328                                 | 4.24496574631513   |
| 16         | 284                  | cellular component disassembly at cellular level |                    |
| GO:0022411 | 6.94154593913884e-06 | 4.10676470588235                                 | 4.30475399626323   |
| 16         | 288                  | cellular component disassembly                   |                    |

Tissue: Muscle\_Skeletal=>Adipose\_Subcutaneous Type: asymmetric

SourceGene: CTD-2089024.1(ENSG00000248966.1) This is an expressed pseudogene. what does this mean? How high is its expression?

|                |          |          |        |        |          |         |          |        |       |      |
|----------------|----------|----------|--------|--------|----------|---------|----------|--------|-------|------|
| TargetGeneSet: | RP1      | RPS8     | RPL5   | RP11   | DDIT3    | UBC     | CCDC115  | EEF1B2 |       |      |
| SETD5          | RPL15    | RPL10AP6 | AIMP1  | RPS3A  | CCNO     | NDUFAF2 | TAF9     | BTF3   | CTB   |      |
| NPM1           | RPL15P3  | ABT1     | RPL10A | DAAM2  | TBCC     | EEF1A1  | HOXA-AS3 | SSBP1  | CTD   |      |
| RPL7           | PABPC1   | EIF3H    | RPS6   | RPL12  | EEF1A1P5 |         | RPL7A    | RPS24  | TCTN3 |      |
| MORN4          | C11orf46 |          | EIF3M  | PHB2   | CDK4     | NAP1L1  | RPL18AP3 |        | DGKH  | TPT1 |
| WDFY2          | TPPP2    | RSL24D1  | RPS17L | MEF2A  | RSL1D1   | RPL26   | RPL23A   | TAOK1  | RPL19 |      |
| PSMG2          | RPL17    | AKAP8L   | RPL18  | RPL13A | RPS9     | RPS5    | RPL12P4  | YDJC   | EIF3L |      |
| RPSAP9         | RPL10    |          |        |        |          |         |          |        |       |      |

| GOBPID     | Pvalue   | OddsRatio | ExpCount    | Count       | Size | Term                     |
|------------|----------|-----------|-------------|-------------|------|--------------------------|
| GO:0006414 | 2.57E-36 |           | 133.8487805 | 0.385094457 | 23   | 105                      |
|            |          |           |             |             |      | translational elongation |

STable4\_20PerPair

|                                                                       |          |             |             |    |     |
|-----------------------------------------------------------------------|----------|-------------|-------------|----|-----|
| GO:0006413                                                            | 3.18E-36 | 100.3304274 | 0.557470071 | 25 | 152 |
| translational initiation                                              |          |             |             |    |     |
| GO:0006415                                                            | 1.38E-33 | 134.325     | 0.33374853  | 21 | 91  |
| translational termination                                             |          |             |             |    |     |
| GO:0000184                                                            | 6.77E-33 | 104.6298637 | 0.436440385 | 22 | 119 |
| "nuclear-transcribed mRNA catabolic process, nonsense-mediated decay" |          |             |             |    |     |
| GO:0006614                                                            | 3.86E-32 | 111.828125  | 0.385094457 | 21 | 105 |
| SRP-dependent cotranslational protein targeting to membrane           |          |             |             |    |     |
| GO:0006613                                                            | 4.81E-32 | 110.5047794 | 0.388762023 | 21 | 106 |
| cotranslational protein targeting to membrane                         |          |             |             |    |     |
| GO:0045047                                                            | 4.81E-32 | 110.5047794 | 0.388762023 | 21 | 106 |
| protein targeting to ER                                               |          |             |             |    |     |
| GO:0072599                                                            | 4.81E-32 | 110.5047794 | 0.388762023 | 21 | 106 |
| establishment of protein localization to endoplasmic reticulum        |          |             |             |    |     |

STable4\_20PerPair

|                                               |          |             |             |    |     |      |
|-----------------------------------------------|----------|-------------|-------------|----|-----|------|
| GO:0070972                                    | 5.61E-31 | 96.75289948 | 0.432772818 | 21 | 118 |      |
| protein localization to endoplasmic reticulum |          |             |             |    |     |      |
| GO:0000956                                    | 2.60E-29 | 68.80008778 | 0.619818698 | 22 | 169 |      |
| nuclear-transcribed mRNA catabolic process    |          |             |             |    |     |      |
| GO:0006402                                    | 8.62E-29 | 64.78990902 | 0.652826794 | 22 | 178 | mRNA |
| catabolic process                             |          |             |             |    |     |      |
| GO:0019080                                    | 1.43E-28 | 72.02596154 | 0.553802505 | 21 | 151 |      |
| viral genome expression                       |          |             |             |    |     |      |
| GO:0019083                                    | 1.43E-28 | 72.02596154 | 0.553802505 | 21 | 151 |      |
| viral transcription                           |          |             |             |    |     |      |
| GO:0006612                                    | 1.92E-28 | 70.92471591 | 0.561137638 | 21 | 153 |      |
| protein targeting to membrane                 |          |             |             |    |     |      |
| GO:0043624                                    | 1.92E-28 | 70.92471591 | 0.561137638 | 21 | 153 |      |
| cellular protein complex disassembly          |          |             |             |    |     |      |
| GO:0043241                                    | 3.91E-28 | 68.3122719  | 0.579475469 | 21 | 158 |      |
| protein complex disassembly                   |          |             |             |    |     |      |

STable4\_20PerPair

|                                                                  |          |             |             |    |     |       |
|------------------------------------------------------------------|----------|-------------|-------------|----|-----|-------|
| GO:0006401<br>catabolic process                                  | 2.19E-27 | 55.12603561 | 0.751851083 | 22 | 205 | RNA   |
| GO:0034623<br>cellular macromolecular complex disassembly        | 3.27E-27 | 61.09987745 | 0.638156529 | 21 | 174 |       |
| GO:0032984<br>macromolecular complex disassembly                 | 6.09E-27 | 59.14556962 | 0.65649436  | 21 | 179 |       |
| GO:0072594<br>establishment of protein localization to organelle | 1.05E-25 | 50.97592213 | 0.748183517 | 21 | 204 |       |
| GO:0019058<br>infectious cycle                                   | 1.53E-24 | 44.3375     | 0.847207806 | 21 | 231 | viral |
| GO:0022415<br>viral reproductive process                         | 1.92E-23 | 38.87800732 | 0.953567227 | 21 | 260 |       |
| GO:0071845<br>cellular component disassembly at cellular level   | 1.25E-22 | 35.27031844 | 1.041588817 | 21 | 284 |       |



STable4\_20PerPair

|                                                 |          |             |             |    |     |      |
|-------------------------------------------------|----------|-------------|-------------|----|-----|------|
| GO:0022411                                      | 1.68E-22 | 34.7320927  | 1.056259082 | 21 | 288 |      |
| cellular component disassembly                  |          |             |             |    |     |      |
| GO:0016032                                      | 8.54E-20 | 23.10835401 | 1.654072383 | 22 | 451 |      |
| viral reproduction                              |          |             |             |    |     |      |
| GO:0033365                                      | 5.07E-18 | 20.24792588 | 1.73475884  | 21 | 473 |      |
| protein localization to organelle               |          |             |             |    |     |      |
| GO:0006605                                      | 5.30E-18 | 20.2017798  | 1.738426406 | 21 | 474 |      |
| protein targeting                               |          |             |             |    |     |      |
| GO:0042254                                      | 1.34E-10 | 23.85644972 | 0.546467373 | 10 | 149 |      |
| ribosome biogenesis                             |          |             |             |    |     |      |
| GO:0022613                                      | 4.38E-10 | 17.35914553 | 0.825202408 | 11 | 225 |      |
| ribonucleoprotein complex biogenesis            |          |             |             |    |     |      |
| GO:0071843                                      | 8.32E-10 | 16.27715121 | 0.876548336 | 11 | 239 |      |
| cellular component biogenesis at cellular level |          |             |             |    |     |      |
| GO:0006364                                      | 9.58E-08 | 22.43545495 | 0.381426891 | 7  | 104 | rRNA |

STable4\_20PerPair

processing

|                                    |          |             |             |   |     |      |
|------------------------------------|----------|-------------|-------------|---|-----|------|
| GO:0016072                         | 1.41E-07 | 21.11967075 | 0.403432288 | 7 | 110 | rRNA |
| metabolic process                  |          |             |             |   |     |      |
| GO:0042274                         | 4.75E-07 | 83.87172012 | 0.066016193 | 4 | 18  |      |
| ribosomal small subunit biogenesis |          |             |             |   |     |      |
| GO:0034470                         | 7.87E-06 | 11.20015769 | 0.733513252 | 7 | 200 |      |
| ncRNA processing                   |          |             |             |   |     |      |
| GO:0034660                         | 8.51E-06 | 9.062815884 | 1.045256384 | 8 | 285 |      |
| ncRNA metabolic process            |          |             |             |   |     |      |
| GO:0042273                         | 1.00E-05 | 95.92666667 | 0.044010795 | 3 | 12  |      |
| ribosomal large subunit biogenesis |          |             |             |   |     |      |

Tissue: Muscle\_Skeletal=>Adipose\_Subcutaneous Type: cluster

SourceGene: CTD-2089024.1(ENSG00000248966.1)

TargetGeneSet: RP1 RPS8 RPL5 RP11 DDIT3 UBC CCDC115 EEF1B2

SETD5 RPL15 RPL10AP6 AIMP1 RPS3A CCNO NDUFAF2 TAF9 BTF3 CTB

NPM1 RPL15P3 ABT1 RPL10A DAAM2 TBCC EEF1A1 HOXA-AS3 SSBP1 CTD

RPL7 PABPC1 EIF3H RPS6 RPL12 EEF1A1P5 RPL7A RPS24 TCTN3

MORN4 C11orf46 EIF3M PHB2 CDK4 NAP1L1 RPL18AP3 DGKH TPT1

WDFY2 TPPP2 RSL24D1 RPS17L MEF2A RSL1D1 RPL26 RPL23A TAOK1 RPL19

PSMG2 RPL17 AKAP8L RPL18 RPL13A RPS9 RPS5 RPL12P4 YDJC EIF3L

RPSAP9 RPL10

| GOBPID     | Pvalue | OddsRatio | ExpCount             | Count            | Size | Term              |
|------------|--------|-----------|----------------------|------------------|------|-------------------|
| GO:0006414 | 23     | 105       | 2.57316855367557e-36 | 133.848780487805 |      | 0.385094457130994 |
| GO:0006413 |        |           | 3.18438255427382e-36 | 100.330427446569 |      | 0.557470071275344 |

Stable4\_20PerPair

|            |     |                                                                     |                  |                    |  |    |  |     |
|------------|-----|---------------------------------------------------------------------|------------------|--------------------|--|----|--|-----|
| 25         | 152 | translational initiation                                            |                  |                    |  |    |  |     |
| GO:0006415 |     | 1.37683091113982e-33                                                | 134.325          | 0.333748529513528  |  | 21 |  | 91  |
|            |     | translational termination                                           |                  |                    |  |    |  |     |
| GO:0000184 |     | 6.76824231087336e-33                                                | 104.62986365148  | 0.43644038474846   |  |    |  | 22  |
| 119        |     | nuclear-transcribed mRNA catabolic process, nonsense-mediated decay |                  |                    |  |    |  |     |
| GO:0006614 |     | 3.86335117243005e-32                                                | 111.828125       | 0.385094457130994  |  |    |  | 21  |
| 105        |     | SRP-dependent cotranslational protein targeting to membrane         |                  |                    |  |    |  |     |
| GO:0006613 |     | 4.80757453431886e-32                                                | 110.504779411765 | 0.388762023389385  |  |    |  |     |
| 21         | 106 | cotranslational protein targeting to membrane                       |                  |                    |  |    |  |     |
| GO:0045047 |     | 4.80757453431886e-32                                                | 110.504779411765 | 0.388762023389385  |  |    |  |     |
| 21         | 106 | protein targeting to ER                                             |                  |                    |  |    |  |     |
| GO:0072599 |     | 4.80757453431886e-32                                                | 110.504779411765 | 0.388762023389385  |  |    |  |     |
| 21         | 106 | establishment of protein localization to endoplasmic reticulum      |                  |                    |  |    |  |     |
| GO:0070972 |     | 5.60861412618874e-31                                                | 96.7528994845361 | 0.43277281849007   |  |    |  |     |
| 21         | 118 | protein localization to endoplasmic reticulum                       |                  |                    |  |    |  |     |
| GO:0000956 |     | 2.60238859680657e-29                                                | 68.8000877770463 | 0.619818697667981  |  |    |  |     |
| 22         | 169 | nuclear-transcribed mRNA catabolic process                          |                  |                    |  |    |  |     |
| GO:0006402 |     | 8.6246094938347e-29                                                 | 64.7899090157155 | 0.652826793993495  |  |    |  |     |
| 22         | 178 | mRNA catabolic process                                              |                  |                    |  |    |  |     |
| GO:0019080 |     | 1.43194412988401e-28                                                | 72.0259615384615 | 0.553802505016954  |  |    |  |     |
| 21         | 151 | viral genome expression                                             |                  |                    |  |    |  |     |
| GO:0019083 |     | 1.43194412988401e-28                                                | 72.0259615384615 | 0.553802505016954  |  |    |  |     |
| 21         | 151 | viral transcription                                                 |                  |                    |  |    |  |     |
| GO:0006612 |     | 1.91761007854905e-28                                                | 70.9247159090909 | 0.561137637533735  |  |    |  |     |
| 21         | 153 | protein targeting to membrane                                       |                  |                    |  |    |  |     |
| GO:0043624 |     | 1.91761007854905e-28                                                | 70.9247159090909 | 0.561137637533735  |  |    |  |     |
| 21         | 153 | cellular protein complex disassembly                                |                  |                    |  |    |  |     |
| GO:0043241 |     | 3.90934916237724e-28                                                | 68.3122718978102 | 0.579475468825687  |  |    |  |     |
| 21         | 158 | protein complex disassembly                                         |                  |                    |  |    |  |     |
| GO:0006401 |     | 2.19300724539094e-27                                                | 55.1260356072625 | 0.751851082970037  |  |    |  |     |
| 22         | 205 | RNA catabolic process                                               |                  |                    |  |    |  |     |
| GO:0034623 |     | 3.27259657214294e-27                                                | 61.0998774509804 | 0.638156528959934  |  |    |  |     |
| 21         | 174 | cellular macromolecular complex disassembly                         |                  |                    |  |    |  |     |
| GO:0032984 |     | 6.08849197704669e-27                                                | 59.1455696202532 | 0.656494360251886  |  |    |  |     |
| 21         | 179 | macromolecular complex disassembly                                  |                  |                    |  |    |  |     |
| GO:0072594 |     | 1.04927189093189e-25                                                | 50.9759221311475 | 0.748183516711646  |  |    |  |     |
| 21         | 204 | establishment of protein localization to organelle                  |                  |                    |  |    |  |     |
| GO:0019058 |     | 1.53164327185711e-24                                                | 44.3375          | 0.847207805688188  |  | 21 |  | 231 |
|            |     | viral infectious cycle                                              |                  |                    |  |    |  |     |
| GO:0022415 |     | 1.920198072866e-23                                                  | 38.8780073221757 | 0.95356722718151   |  |    |  |     |
| 21         | 260 | viral reproductive process                                          |                  |                    |  |    |  |     |
| GO:0071845 |     | 1.25135930369499e-22                                                | 35.2703184410646 | 1.04158881738288   |  |    |  |     |
| 21         | 284 | cellular component disassembly at cellular level                    |                  |                    |  |    |  |     |
| GO:0022411 |     | 1.68221806922201e-22                                                | 34.7320926966292 | 1.05625908241644   |  |    |  |     |
| 21         | 288 | cellular component disassembly                                      |                  |                    |  |    |  |     |
| GO:0016032 |     | 8.54399763582425e-20                                                | 23.1083540115798 | 1.65407238253408   |  |    |  |     |
| 22         | 451 | viral reproduction                                                  |                  |                    |  |    |  |     |
| GO:0033365 |     | 5.07474222486416e-18                                                | 20.2479258849558 | 1.73475884021867   |  |    |  |     |
| 21         | 473 | protein localization to organelle                                   |                  |                    |  |    |  |     |
| GO:0006605 |     | 5.2984331346356e-18                                                 | 20.2017798013245 | 1.73842640647706   |  |    |  |     |
| 21         | 474 | protein targeting                                                   |                  |                    |  |    |  |     |
| GO:0042254 |     | 1.33696473540869e-10                                                | 23.8564497239418 | 0.546467372500173  |  |    |  |     |
| 10         | 149 | ribosome biogenesis                                                 |                  |                    |  |    |  |     |
| GO:0022613 |     | 4.38238687051113e-10                                                | 17.3591455273698 | 0.825202408137845  |  |    |  |     |
| 11         | 225 | ribonucleoprotein complex biogenesis                                |                  |                    |  |    |  |     |
| GO:0071843 |     | 8.31956408197553e-10                                                | 16.2771512113617 | 0.876548335755311  |  |    |  |     |
| 11         | 239 | cellular component biogenesis at cellular level                     |                  |                    |  |    |  |     |
| GO:0006364 |     | 9.57804202948499e-08                                                | 22.4354549529359 | 0.381426890872604  |  |    |  |     |
| 7          | 104 | rRNA processing                                                     |                  |                    |  |    |  |     |
| GO:0016072 |     | 1.41089845216968e-07                                                | 21.1196707471507 | 0.403432288422946  |  |    |  |     |
| 7          | 110 | rRNA metabolic process                                              |                  |                    |  |    |  |     |
| GO:0042274 |     | 4.74914639992733e-07                                                | 83.8717201166181 | 0.0660161926510276 |  |    |  |     |
| 4          | 18  | ribosomal small subunit biogenesis                                  |                  |                    |  |    |  |     |

| STable4_20PerPair                                              |                      |                                    |                    |
|----------------------------------------------------------------|----------------------|------------------------------------|--------------------|
| GO:0034470                                                     | 7.87291764517478e-06 | 11.2001576931741                   | 0.733513251678085  |
| 7                                                              | 200                  | ncRNA processing                   |                    |
| GO:0034660                                                     | 8.51423230299042e-06 | 9.06281588447653                   | 1.04525638364127   |
| 8                                                              | 285                  | ncRNA metabolic process            |                    |
| GO:0042273                                                     | 1.00118700227926e-05 | 95.9266666666667                   | 0.0440107951006851 |
| 3                                                              | 12                   | ribosomal large subunit biogenesis |                    |
| Tissue: Muscle_Skeletal=>Adipose_Subcutaneous Type: asymmetric |                      |                                    |                    |

SourceGene: ENSG00000229344.1 Also an expressed pseudogene?

STable4\_20PerPair

|                |          |           |          |          |           |         |           |           |              |
|----------------|----------|-----------|----------|----------|-----------|---------|-----------|-----------|--------------|
| TargetGeneSet: | MTND2P28 | RPL22     | ICMT     | CLSTN1   | NMNAT1    | DFFA    | MFN2      |           |              |
| VPS13D         | DDI2     | SPEN      | UBR4     | KIAA0090 | LDLRAD2   | HSPG2   | RPL11     | ARID1A    |              |
| WASF2          | KPNA7    | ZMYM4     | THRAP3   | MEAF6    | MFI2      | MACF1   | RP1       | SZT2      | RPS8         |
| RPS15AP10      |          | TM2D1     | RP4      | FAM73A   | GNG5      | RPL5    | RP11      | SORT1     | ATP5F1       |
| HIPK1          | NBPF16   | HIST2H2BD |          | RPRD2    | JTB       | RPS27   | ASH1L     | MIR555    | SSR2         |
| MEF2D          | ARHGEF11 |           | COPA     | POU2F1   | PRRC2C    | CEP350  | ARPC5     | RPS7      | ADAM18 NBAS  |
| ASXL2          | PPP1CB   | DHX57     | RHOQ     | UBC      | USP34     | C1D     | AAK1      | TET3      | DCTN1        |
| TMEM131        | EIF5B    | RANBP2    | UGGT1    | MZT2B    | MLK7-AS1  |         | SENP2     | PLEKHM3   | GIGYF2       |
| SETD5          | RPL32    | NR2C2     | RPL15    | MAP4     | CELSR3    | LAMB2   | RAD54L2   | RPL29     | DNAH1        |
| APPL1          | KCTD6    | PCNP      | RPL24    | CNBP     | NME9      | PDCD10  | PHC3      | DNAJC19   | PSMD2        |
| EIF4G1         | CPN2     | HTT       | BOD1L    | RELL1    | COPS4     | UBE2D3  | AIMP1     | RPL34     | RPS3A        |
| NIPBL          | CTD      | MRPS36    | TAF9     | TBCA     | ARSB      | ERAP1   | MAN2A1    | APC       | HINT1 AFF4   |
| SKP1           | CTB      | MTND5P11  |          | KDM3B    | PAIP2     | PCDHGB3 | PCDHGB6   | RPS14     | RPL15P3 NOL7 |
| DEK            | GPLD1    | ABT1      | PPP1R10  | TAPBP    | RPS10     | RPL10A  | C6orf89   | MTRNR2L9  |              |
| WDR11          | ASCC3    | MRPS12    | PHACTR2  | IGF2R    | FOXK1     | PHF14   | MPLKIP    | CHCHD2    | LMTK2        |
| RPS3AP26       |          | TRRAP     | GNB2     | CUX1     | SLC26A4   | TNPO3   | HIPK2     | MLL3      | KAT6A        |
| HOOK3          | RPS20    | ASPH      | RBM12B   | RPL30    | POLR2K    | TRAPPC9 | HEATR7A   | VPS28     | RPL8 RPS6    |
| TLN1           | CLTA     | CNN2P4    | HSD17B3  | XPA      | NIPSNAP3A |         | TMEM245   | FKBP15    | ATP6V1G1     |
| RPL35          | RPL12    | NUP188    | SETX     | RPL7A    | COMMD3    | PRINS   | FUT11     | KIAA0913  |              |
| RPS24          | GBF1     | ARL3      | EIF6     | RPL27A   | MTRNR2L8  |         | TSG101    | CKAP5     | C1QTNF4      |
| C11orf31       |          | DDB1      | GANAB    | FAU      | PACS1     | PPP6R3  | TMEM126B  |           | TMEM126A     |
| SDHD           | BACE1    | UBE4A     | ATP5L    | DDX6     | RPL23AP64 |         | VPS11     | SIAE      | KDM5A ERC1   |
| USP5           | C12orf57 |           | FGFR10P2 |          | SCAF11    | MLL4    | PFDN5     | BAZ2A     | LRP1         |
| TMBIM4         | RBMS1P1  | EEA1      | APAF1    | RPL18AP3 |           | VPS29   | ACAD10    | SBN01     | ZC3H13 ESD   |
| RPL13AP25      |          | COMMD6    | DNAJC3   | HMGB3P4  | CCNB1IP1  |         | CHD8      | C14orf119 |              |
| C14orf21       |          | STRN3     | FNTB     | MED6     | YLPM1     | SEL1L   | C14orf102 |           | CCNK         |
| DYNC1H1        | CYFIP1   | HERC2     | HERC2P10 |          | RPAP1     | VPS39   | CCNDBP1   | DUT       | USP8         |
| CCPG1          | RPS3AP6  | LRRC49    | SIN3A    | C15orf40 |           | SEC11A  | IQGAP1    | MEF2A     | JMJD8 NME3   |
| SPSB3          | NDUFB10  | ECI1      | MGRN1    | NOM01    | RPS15A    | ZNF771  | SRCAP     | ZNF629    | CES1P2       |
| NFATC3         | AARS     | GABARAPL2 |          | CDYL2    | HSBP1     | RPL13   | VPS53     | RP13      | METTTL16     |
| ZZEF1          | SLC35G6  | RPL26     | TOM1L2   | RPS7P1   | PIGS      | SUPT6H  | RPL23A    | TAOK1     | CPD          |
| TAF15          | RPL19    | CDK12     | WIPF2    | NKIRAS2  | STAT5A    | AOC3    | RPL27     | NMT1      | CLTC         |
| HEATR6         | DCAF7    | COG1      | NT5C     | TNRC6C   | RPTOR     | ROCK1P1 | C18orf21  |           | C18orf32     |
| RPL17          | ZNF407   | TPGS1     | ATP5D    | RPS15    | RPL36     | TRAPPC5 | ZNF121    | LPHN1     | BRD4         |
| YJEFN3         | RPS19    | POU2F2    | MEGF8    | SNRPD2   | ARHGAP35  |         | RPL18     | NUCB1     | RPL13A       |
| MYH7B          | RPS9     | ZNF587    | RPS5     | ATR      | KIF3B     | NCOA6   | SCAND1    | RALGAPB   | NCOA3 ADNP   |
| PSMD10P1       |          | TSHZ2     | RPL12P4  | SON      | PCBP3     | PI4KA   | YDJC      | FAM211B   | CTA MPST     |
| APOBEC3C       |          | RPL3      | TNRC6B   | EP300    | TCF20     | VCX3B   | TMSB4X    | RPL9P7    | DYNLT3       |
| USP9X          | CDK16    | KDM5C     | HUWE1    | GNL3L    | CBX1P1    | RPS4X   | APOOL     | RPL39     | THOC2        |
| HCFC1          | RPL10    |           |          |          |           |         |           |           |              |

GOBPID Pvalue OddsRatio ExpCount Count Size Term

STable4\_20PerPair

|                           |          |             |             |    |    |
|---------------------------|----------|-------------|-------------|----|----|
| GO:0006415                | 1.18E-50 | 52.83744681 | 1.851359767 | 44 | 91 |
| translational termination |          |             |             |    |    |

STable4\_20PerPair

|                                                             |          |             |             |    |     |
|-------------------------------------------------------------|----------|-------------|-------------|----|-----|
| GO:0006614                                                  | 2.09E-50 | 44.32121378 | 2.136184347 | 46 | 105 |
| SRP-dependent cotranslational protein targeting to membrane |          |             |             |    |     |

|                                               |          |             |            |    |     |
|-----------------------------------------------|----------|-------------|------------|----|-----|
| GO:0006613                                    | 3.63E-50 | 43.57943548 | 2.15652896 | 46 | 106 |
| cotranslational protein targeting to membrane |          |             |            |    |     |

STable4\_20PerPair

|                         |          |             |            |    |     |
|-------------------------|----------|-------------|------------|----|-----|
| GO:0045047              | 3.63E-50 | 43.57943548 | 2.15652896 | 46 | 106 |
| protein targeting to ER |          |             |            |    |     |

|                                                                |          |             |            |    |     |
|----------------------------------------------------------------|----------|-------------|------------|----|-----|
| GO:0072599                                                     | 3.63E-50 | 43.57943548 | 2.15652896 | 46 | 106 |
| establishment of protein localization to endoplasmic reticulum |          |             |            |    |     |



STable4\_20PerPair

|                                               |          |             |             |    |     |
|-----------------------------------------------|----------|-------------|-------------|----|-----|
| GO:0070972                                    | 1.64E-47 | 36.28528226 | 2.400664314 | 46 | 118 |
| protein localization to endoplasmic reticulum |          |             |             |    |     |

|                          |          |             |             |    |     |
|--------------------------|----------|-------------|-------------|----|-----|
| GO:0006414               | 3.78E-47 | 40.67042623 | 2.136184347 | 44 | 105 |
| translational elongation |          |             |             |    |     |

STable4\_20PerPair

|                                                                       |          |             |             |    |     |
|-----------------------------------------------------------------------|----------|-------------|-------------|----|-----|
| GO:0000184                                                            | 9.27E-46 | 34.39352003 | 2.421008927 | 45 | 119 |
| "nuclear-transcribed mRNA catabolic process, nonsense-mediated decay" |          |             |             |    |     |

STable4\_20PerPair

|                               |          |             |             |    |     |
|-------------------------------|----------|-------------|-------------|----|-----|
| GO:0006612                    | 3.01E-44 | 26.11289199 | 3.112725763 | 48 | 153 |
| protein targeting to membrane |          |             |             |    |     |

|                          |          |            |            |    |     |
|--------------------------|----------|------------|------------|----|-----|
| GO:0006413               | 5.47E-43 | 25.4653557 | 3.09238115 | 47 | 152 |
| translational initiation |          |            |            |    |     |

STable4\_20PerPair

|                         |          |             |             |    |     |
|-------------------------|----------|-------------|-------------|----|-----|
| GO:0019080              | 9.76E-42 | 24.82304147 | 3.072036537 | 46 | 151 |
| viral genome expression |          |             |             |    |     |

|                     |          |             |             |    |     |
|---------------------|----------|-------------|-------------|----|-----|
| GO:0019083          | 9.76E-42 | 24.82304147 | 3.072036537 | 46 | 151 |
| viral transcription |          |             |             |    |     |

STable4\_20PerPair

|                                      |          |             |             |    |     |
|--------------------------------------|----------|-------------|-------------|----|-----|
| GO:0043624                           | 4.65E-40 | 23.50903614 | 3.112725763 | 45 | 153 |
| cellular protein complex disassembly |          |             |             |    |     |

|                             |          |             |             |    |     |
|-----------------------------|----------|-------------|-------------|----|-----|
| GO:0043241                  | 2.34E-39 | 22.46081672 | 3.214448827 | 45 | 158 |
| protein complex disassembly |          |             |             |    |     |

STable4\_20PerPair

|                                            |          |             |             |    |     |
|--------------------------------------------|----------|-------------|-------------|----|-----|
| GO:0000956                                 | 3.16E-39 | 21.16325728 | 3.438239568 | 46 | 169 |
| nuclear-transcribed mRNA catabolic process |          |             |             |    |     |

STable4\_20PerPair

|                                                    |          |             |             |    |     |
|----------------------------------------------------|----------|-------------|-------------|----|-----|
| GO:0072594                                         | 6.75E-39 | 18.06709677 | 4.150301017 | 49 | 204 |
| establishment of protein localization to organelle |          |             |             |    |     |

|                                             |          |             |             |    |     |
|---------------------------------------------|----------|-------------|-------------|----|-----|
| GO:0034623                                  | 1.37E-38 | 20.32932208 | 3.539962632 | 46 | 174 |
| cellular macromolecular complex disassembly |          |             |             |    |     |

STable4\_20PerPair

|                   |          |             |             |    |     |      |
|-------------------|----------|-------------|-------------|----|-----|------|
| GO:0006402        | 4.30E-38 | 19.70766129 | 3.621341084 | 46 | 178 | mRNA |
| catabolic process |          |             |             |    |     |      |

|                                    |          |             |             |    |     |
|------------------------------------|----------|-------------|-------------|----|-----|
| GO:0032984                         | 5.68E-38 | 19.55808877 | 3.641685696 | 46 | 179 |
| macromolecular complex disassembly |          |             |             |    |     |



STable4\_20PerPair

|                            |          |             |             |    |     |
|----------------------------|----------|-------------|-------------|----|-----|
| GO:0022415                 | 5.99E-37 | 14.41012397 | 5.289599336 | 52 | 260 |
| viral reproductive process |          |             |             |    |     |

|                        |          |             |             |    |     |
|------------------------|----------|-------------|-------------|----|-----|
| GO:0019058             | 4.17E-36 | 15.35714286 | 4.699605564 | 49 | 231 |
| viral infectious cycle |          |             |             |    |     |

STable4\_20PerPair

|                   |          |             |            |    |     |     |
|-------------------|----------|-------------|------------|----|-----|-----|
| GO:0006401        | 4.47E-35 | 16.32958004 | 4.17064563 | 46 | 205 | RNA |
| catabolic process |          |             |            |    |     |     |

STable4\_20PerPair

|                    |          |             |             |    |     |
|--------------------|----------|-------------|-------------|----|-----|
| GO:0016032         | 3.33E-32 | 9.027477212 | 9.175420386 | 60 | 451 |
| viral reproduction |          |             |             |    |     |

|                                                  |          |             |             |    |     |
|--------------------------------------------------|----------|-------------|-------------|----|-----|
| GO:0071845                                       | 1.69E-29 | 11.17613898 | 5.777870044 | 47 | 284 |
| cellular component disassembly at cellular level |          |             |             |    |     |

STable4\_20PerPair

|                                |          |             |             |    |     |
|--------------------------------|----------|-------------|-------------|----|-----|
| GO:0022411                     | 3.23E-29 | 10.98748467 | 5.859248495 | 47 | 288 |
| cellular component disassembly |          |             |             |    |     |

|                                   |          |             |             |    |     |
|-----------------------------------|----------|-------------|-------------|----|-----|
| GO:0033365                        | 2.82E-28 | 7.944224684 | 9.623001868 | 57 | 473 |
| protein localization to organelle |          |             |             |    |     |

STable4\_20PerPair

|                   |          |             |             |    |     |
|-------------------|----------|-------------|-------------|----|-----|
| GO:0006605        | 3.15E-28 | 7.924597031 | 9.643346481 | 57 | 474 |
| protein targeting |          |             |             |    |     |

|                                    |          |             |             |   |    |
|------------------------------------|----------|-------------|-------------|---|----|
| GO:0042274                         | 3.53E-08 | 31.36585366 | 0.366203031 | 7 | 18 |
| ribosomal small subunit biogenesis |          |             |             |   |    |

STable4\_20PerPair

|                                      |          |             |             |    |     |
|--------------------------------------|----------|-------------|-------------|----|-----|
| GO:0022613                           | 1.73E-07 | 4.679064431 | 4.577537887 | 19 | 225 |
| ribonucleoprotein complex biogenesis |          |             |             |    |     |

STable4\_20PerPair

|                                                 |          |             |             |    |     |
|-------------------------------------------------|----------|-------------|-------------|----|-----|
| GO:0071843                                      | 4.42E-07 | 4.376909091 | 4.862362466 | 19 | 239 |
| cellular component biogenesis at cellular level |          |             |             |    |     |

|                     |          |             |             |    |     |
|---------------------|----------|-------------|-------------|----|-----|
| GO:0042254          | 2.12E-06 | 5.193333333 | 3.031347312 | 14 | 149 |
| ribosome biogenesis |          |             |             |    |     |

STable4\_20PerPair

|                          |          |            |             |    |     |      |
|--------------------------|----------|------------|-------------|----|-----|------|
| GO:0006364<br>processing | 8.53E-06 | 5.87803488 | 2.115839734 | 11 | 104 | rRNA |
|--------------------------|----------|------------|-------------|----|-----|------|

|                                 |          |             |             |    |     |      |
|---------------------------------|----------|-------------|-------------|----|-----|------|
| GO:0016072<br>metabolic process | 1.46E-05 | 5.519434629 | 2.237907411 | 11 | 110 | rRNA |
|---------------------------------|----------|-------------|-------------|----|-----|------|



STable4\_20PerPair

| Tissue: Muscle_skeletal=>Adipose_subcutaneous                    | Type:                                            | cluster                   |
|------------------------------------------------------------------|--------------------------------------------------|---------------------------|
| SourceGene: ENSG00000229344.1                                    |                                                  |                           |
| TargetGeneSet: MTND2P28                                          | RPL22 ICMT CLSTN1 NMNAT1 DFFA MFN2               |                           |
| VPS13D DDI2 SPEN UBR4 KIAA0090                                   | LDLRAD2 HSPG2 RPL11 ARID1A                       |                           |
| WASF2 KPNA7 ZMYM4 THRAP3 MEAF6 MFI2 MACF1 RP1 SZT2 RPS8          |                                                  |                           |
| RPS15AP10 TM2D1 RP4 FAM73A GNG5 RPL5 RP11 SORT1 ATP5F1           |                                                  |                           |
| HIPK1 NBPF16 HIST2H2BD                                           | RPRD2 JTB RPS27 ASH1L MIR555 SSR2                |                           |
| MEF2D ARHGEF11                                                   | COPA POU2F1 PRRC2C CEP350 ARPC5 RPS7 ADAM18 NBAS |                           |
| ASXL2 PPP1CB DHX57 RHOQ UBC USP34 C1D AAK1 TET3 DCTN1            |                                                  |                           |
| TMEM131 EIF5B RANBP2 UGGT1 MZT2B MLK7-AS1                        | SENP2 PLEKHM3 GIGYF2                             |                           |
| SETD5 RPL32 NR2C2 RPL15 MAP4 CELSR3 LAMB2 RAD54L2 RPL29 DNAH1    |                                                  |                           |
| APPL1 KCTD6 PCNP RPL24 CNBP NME9 PDCD10 PHC3 DNAJC19 PSMD2       |                                                  |                           |
| EIF4G1 CPN2 HTT BOD1L RELL1 COPS4 UBE2D3 AIMP1 RPL34 RPS3A       |                                                  |                           |
| NIPBL CTD MRPS36 TAF9 TBCA ARSB ERAP1 MAN2A1 APC HINT1 AFF4      |                                                  |                           |
| SKP1 CTB MTND5P11                                                | KDM3B PAIP2 PCDHGB3 PCDHGB6 RPS14 RPL15P3 NOL7   |                           |
| DEK GPLD1 ABT1 PPP1R10 TAPBP RPS10 RPL10A C6orf89 MTRNR2L9       |                                                  |                           |
| WDR11 ASCC3 MRPS12 PHACTR2 IGF2R FOXK1 PHF14 MPLKIP CHCHD2 LMTK2 |                                                  |                           |
| RPS3AP26 TRRAP GNB2 CUX1 SLC26A4 TNPO3 HIPK2 MLL3 KAT6A          |                                                  |                           |
| HOOK3 RPS20 ASPH RBM12B RPL30 POLR2K TRAPPC9                     | HEATR7A VPS28 RPL8 RPS6                          |                           |
| TLN1 CLTA CNN2P4 HSD17B3 XPA NIPSNAP3A                           | TMEM245 FKBP15 ATP6V1G1                          |                           |
| RPL35 RPL12 NUP188 SETX RPL7A COMMD3 PRINS                       | FUT11 KIAA0913                                   |                           |
| RPS24 GBF1 ARL3 EIF6 RPL27A MTRNR2L8                             | TSG101 CKAP5 C1QTNF4                             |                           |
| C11orf31 DDB1 GANAB FAU PACS1 PPP6R3                             | TMEM126B                                         | TMEM126A                  |
| SDHD BACE1 UBE4A ATP5L DDX6 RPL23AP64                            | VPS11 SIAE KDM5A ERC1                            |                           |
| USP5 C12orf57                                                    | SCAF11 MLL4                                      |                           |
| TMBIM4 RBMS1P1 EEA1 APAF1 RPL18AP3                               | VPS29                                            |                           |
| RPL13AP25 COMMD6 DNAJC3 HMGB3P4 CCN1IP1                          | CHD8 C14orf119                                   |                           |
| C14orf21 STRN3 FNTB MED6 YLPM1 SEL1L                             | C14orf102                                        | CCNK                      |
| DYNC1H1 CYFIP1 HERC2 HERC2P10                                    | RPAP1 VPS39                                      | CCNDBP1 DUT USP8          |
| CCPG1 RPS3AP6 LRRC49 SIN3A C15orf40                              | SEC11A                                           | IQGAP1 MEF2A JMJD8 NME3   |
| SPSB3 NDUFB10 ECI1 MGRN1                                         | NOM01 RPS15A ZNF771                              | SRCAP ZNF629 CES1P2       |
| NFATC3 AARS GABARAPL2                                            | CDYL2 HSBP1 RPL13                                | VPS53 RP13 METTL16        |
| ZZEF1 SLC35G6 RPL26 TOM1L2 RPS7P1 PIGS                           | SUPT6H RPL23A                                    | TAOK1 CPD                 |
| TAF15 RPL19 CDK12 WIPF2 NKIRAS2 STAT5A AOC3                      | RPL27                                            | NMT1 CLTC                 |
| HEATR6 DCAF7 COG1 NT5C TNRC6C RPTOR                              | ROCK1P1                                          | C18orf21                  |
| RPL17 ZNF407 TPGS1 ATP5D RPS15 RPL36                             | TRAPPC5                                          | ZNF121 LPHN1 BRD4         |
| YJEFN3 RPS19 POU2F2 MEGF8 SNRPD2 ARHGAP35                        |                                                  | RPL18 NUCB1 RPL13A        |
| MYH7B RPS9 ZNF587 RPS5 ATRN                                      | KIF3B NCOA6                                      | SCAND1 RALGAPB NCOA3 ADNP |
| PSMD10P1 TSHZ2 RPL12P4 SON PCBP3 PI4KA                           | YDJC                                             | FAM211B CTA MPST          |
| APOBEC3C RPL3 TNRC6B EP300 TCF20 VCX3B                           | TMSB4X                                           | RPL9P7 DYNLT3             |
| USP9X CDK16 KDM5C HUWE1 GNL3L                                    | CBX1P1 RPS4X                                     | APOOL RPL39 THOC2         |
| GOBPID Pvalue                                                    | OddsRatio                                        | ExpCount                  |
| GO:0006415                                                       | 1.18091173108757e-50                             | 52.8374468085106          |
|                                                                  |                                                  | Count                     |
|                                                                  |                                                  | Size                      |
|                                                                  |                                                  | Term                      |
|                                                                  |                                                  | 1.85135976749014          |

STable4\_20PerPair

|            |     |                                                                     |                  |                   |    |
|------------|-----|---------------------------------------------------------------------|------------------|-------------------|----|
| 44         | 91  | translational termination                                           |                  |                   |    |
| GO:0006614 |     | 2.09172658551235e-50                                                | 44.3212137780208 | 2.13618434710401  |    |
| 46         | 105 | SRP-dependent cotranslational protein targeting to membrane         |                  |                   |    |
| GO:0006613 |     | 3.63289544301091e-50                                                | 43.579435483871  | 2.15652895993357  | 46 |
| 106        |     | cotranslational protein targeting to membrane                       |                  |                   |    |
| GO:0045047 |     | 3.63289544301091e-50                                                | 43.579435483871  | 2.15652895993357  | 46 |
| 106        |     | protein targeting to ER                                             |                  |                   |    |
| GO:0072599 |     | 3.63289544301091e-50                                                | 43.579435483871  | 2.15652895993357  | 46 |
| 106        |     | establishment of protein localization to endoplasmic reticulum      |                  |                   |    |
| GO:0070972 |     | 1.64396294360088e-47                                                | 36.2852822580645 | 2.40066431388831  |    |
| 46         | 118 | protein localization to endoplasmic reticulum                       |                  |                   |    |
| GO:0006414 |     | 3.78449564522234e-47                                                | 40.6704262295082 | 2.13618434710401  |    |
| 44         | 105 | translational elongation                                            |                  |                   |    |
| GO:0000184 |     | 9.27350257945361e-46                                                | 34.3935200260501 | 2.42100892671787  |    |
| 45         | 119 | nuclear-transcribed mRNA catabolic process, nonsense-mediated decay |                  |                   |    |
| GO:0006612 |     | 3.00677485738495e-44                                                | 26.1128919860627 | 3.11272576292298  |    |
| 48         | 153 | protein targeting to membrane                                       |                  |                   |    |
| GO:0006413 |     | 5.46614409583205e-43                                                | 25.4653556969346 | 3.09238115009342  |    |
| 47         | 152 | translational initiation                                            |                  |                   |    |
| GO:0019080 |     | 9.75572766221803e-42                                                | 24.8230414746544 | 3.07203653726386  |    |
| 46         | 151 | viral genome expression                                             |                  |                   |    |
| GO:0019083 |     | 9.75572766221803e-42                                                | 24.8230414746544 | 3.07203653726386  |    |
| 46         | 151 | viral transcription                                                 |                  |                   |    |
| GO:0043624 |     | 4.65270176117719e-40                                                | 23.5090361445783 | 3.11272576292298  |    |
| 45         | 153 | cellular protein complex disassembly                                |                  |                   |    |
| GO:0043241 |     | 2.34166071234943e-39                                                | 22.4608167182002 | 3.21444882707079  |    |
| 45         | 158 | protein complex disassembly                                         |                  |                   |    |
| GO:0000956 |     | 3.15866900736828e-39                                                | 21.1632572777341 | 3.43823956819597  |    |
| 46         | 169 | nuclear-transcribed mRNA catabolic process                          |                  |                   |    |
| GO:0072594 |     | 6.74610504771765e-39                                                | 18.0670967741935 | 4.15030101723064  |    |
| 49         | 204 | establishment of protein localization to organelle                  |                  |                   |    |
| GO:0034623 |     | 1.37459865525761e-38                                                | 20.3293220766129 | 3.53996263234378  |    |
| 46         | 174 | cellular macromolecular complex disassembly                         |                  |                   |    |
| GO:0006402 |     | 4.29525212359941e-38                                                | 19.7076612903226 | 3.62134108366203  |    |
| 46         | 178 | mRNA catabolic process                                              |                  |                   |    |
| GO:0032984 |     | 5.68264718768384e-38                                                | 19.5580887703129 | 3.64168569649159  |    |
| 46         | 179 | macromolecular complex disassembly                                  |                  |                   |    |
| GO:0022415 |     | 5.99138943130968e-37                                                | 14.4101239669421 | 5.28959933568611  |    |
| 52         | 260 | viral reproductive process                                          |                  |                   |    |
| GO:0019058 |     | 4.17095704564696e-36                                                | 15.3571428571429 | 4.69960556362881  |    |
| 49         | 231 | viral infectious cycle                                              |                  |                   |    |
| GO:0006401 |     | 4.47343411260268e-35                                                | 16.3295800365186 | 4.1706456300602   | 46 |
| 205        |     | RNA catabolic process                                               |                  |                   |    |
| GO:0016032 |     | 3.32587370046433e-32                                                | 9.02747721162043 | 9.17542038613245  |    |
| 60         | 451 | viral reproduction                                                  |                  |                   |    |
| GO:0071845 |     | 1.68874570139949e-29                                                | 11.1761389842669 | 5.7778700435956   | 47 |
| 284        |     | cellular component disassembly at cellular level                    |                  |                   |    |
| GO:0022411 |     | 3.22850201111655e-29                                                | 10.9874846708216 | 5.85924849491385  |    |
| 47         | 288 | cellular component disassembly                                      |                  |                   |    |
| GO:0033365 |     | 2.81601968032666e-28                                                | 7.9442246835443  | 9.62300186838281  | 57 |
| 473        |     | protein localization to organelle                                   |                  |                   |    |
| GO:0006605 |     | 3.14776323708927e-28                                                | 7.92459703123577 | 9.64334648121237  |    |
| 57         | 474 | protein targeting                                                   |                  |                   |    |
| GO:0042274 |     | 3.52846334098024e-08                                                | 31.3658536585366 | 0.366203030932115 |    |
| 7          | 18  | ribosomal small subunit biogenesis                                  |                  |                   |    |
| GO:0022613 |     | 1.72939544098139e-07                                                | 4.67906443071492 | 4.57753788665144  |    |
| 19         | 225 | ribonucleoprotein complex biogenesis                                |                  |                   |    |
| GO:0071843 |     | 4.41698210520289e-07                                                | 4.37690909090909 | 4.86236246626531  |    |
| 19         | 239 | cellular component biogenesis at cellular level                     |                  |                   |    |
| GO:0042254 |     | 2.11823520481386e-06                                                | 5.19333333333333 | 3.03134731160473  |    |
| 14         | 149 | ribosome biogenesis                                                 |                  |                   |    |
| GO:0006364 |     | 8.53332664867264e-06                                                | 5.87803487974467 | 2.11583973427444  |    |
| 11         | 104 | rRNA processing                                                     |                  |                   |    |

Stable4\_20PerPair

GO:0016072 1.46426333350594e-05 5.51943462897527 2.23790741125182  
 11 110 rRNA metabolic process  
 Tissue: Muscle\_Skeletal=>Adipose\_Subcutaneous Type: asymmetric

SourceGene: EPCAM(ENSG00000119888.6) epithelial cell adhesion molecule  
 (disease associations)

TargetGeneSet: C1orf200 TRAPPC3 ATRX NUF2 ASPM RRM2 HJURP  
 DNAJC19 CENPE ANLN ESCO2 PAG1 PAPP A CEP55 MKI67 FAM111B CDCA5  
 ATP5L MPP2 CDCA3 RP11 TROAP HMGA2 CPM SKA3 DIAPH3 BUB1B  
 CASC5 CCNB2 SNAPC5 POLR3K IFT140 PKMYT1 GABARAPL2 SDR42E1 CDT1  
 FANCA FAM64A SNORA48 TOP2A KIF18B TK1 BIRC5 CTD LINGO3 ASF1B  
 ZNF576 TRPM4 SHANK1 UBE2C

| GOBPID                      | Pvalue   | OddsRatio | ExpCount    | Count       | Size | Term     |
|-----------------------------|----------|-----------|-------------|-------------|------|----------|
| GO:0000280                  | 1.46E-15 |           | 24.97050344 | 1.041450419 | 16   | 350      |
| nuclear division            |          |           |             |             |      |          |
| GO:0007067                  | 1.46E-15 |           | 24.97050344 | 1.041450419 | 16   | 350      |
| mitosis                     |          |           |             |             |      |          |
| GO:0000087                  | 2.27E-15 |           | 24.22739018 | 1.071206145 | 16   | 360 M    |
| phase of mitotic cell cycle |          |           |             |             |      |          |
| GO:0048285                  | 3.49E-15 |           | 23.52626072 | 1.100961871 | 16   | 370      |
| organelle fission           |          |           |             |             |      |          |
| GO:0051301                  | 7.88E-14 |           | 18.99014611 | 1.344958826 | 16   | 452 cell |
| division                    |          |           |             |             |      |          |

STable4\_20PerPair

|                                  |          |             |             |    |     |      |
|----------------------------------|----------|-------------|-------------|----|-----|------|
| GO:0010564                       | 1.79E-09 | 13.48675975 | 1.231887067 | 12 | 414 |      |
| regulation of cell cycle process |          |             |             |    |     |      |
| GO:0007059                       | 6.91E-09 | 24.72034632 | 0.416580167 | 8  | 140 |      |
| chromosome segregation           |          |             |             |    |     |      |
| GO:0071156                       | 6.48E-08 | 14.6916955  | 0.785551173 | 9  | 264 |      |
| regulation of cell cycle arrest  |          |             |             |    |     |      |
| GO:0000086                       | 2.01E-07 | 20.25486618 | 0.428482458 | 7  | 144 | G2/M |
| transition of mitotic cell cycle |          |             |             |    |     |      |
| GO:0000075                       | 4.82E-07 | 13.84517705 | 0.720088575 | 8  | 242 | cell |
| cycle checkpoint                 |          |             |             |    |     |      |
| GO:0007050                       | 1.10E-06 | 10.32941176 | 1.097986299 | 9  | 369 | cell |
| cycle arrest                     |          |             |             |    |     |      |
| GO:0071103                       | 1.27E-06 | 15.19871795 | 0.562383226 | 7  | 189 | DNA  |
| conformation change              |          |             |             |    |     |      |
| GO:0051329                       | 1.37E-06 | 10.04308426 | 1.127742025 | 9  | 379 |      |
| interphase of mitotic cell cycle |          |             |             |    |     |      |
| GO:0051325                       | 1.63E-06 | 9.824929972 | 1.151546606 | 9  | 387 |      |
| interphase                       |          |             |             |    |     |      |

STable4\_20PerPair

|                                   |          |             |             |   |     |      |
|-----------------------------------|----------|-------------|-------------|---|-----|------|
| GO:0007346                        | 2.61E-06 | 10.93501211 | 0.901598505 | 8 | 303 |      |
| regulation of mitotic cell cycle  |          |             |             |   |     |      |
| GO:0045786                        | 4.40E-06 | 8.646234195 | 1.300325237 | 9 | 437 |      |
| negative regulation of cell cycle |          |             |             |   |     |      |
| GO:0000236                        | 5.05E-06 | 23.56578947 | 0.252923673 | 5 | 85  |      |
| mitotic prometaphase              |          |             |             |   |     |      |
| GO:0007096                        | 5.30E-06 | 119.9916667 | 0.035706871 | 3 | 12  |      |
| regulation of exit from mitosis   |          |             |             |   |     |      |
| GO:0006323                        | 5.63E-06 | 15.73193602 | 0.455262612 | 6 | 153 | DNA  |
| packaging                         |          |             |             |   |     |      |
| GO:0031577                        | 7.01E-06 | 38.7854251  | 0.12497405  | 4 | 42  |      |
| spindle checkpoint                |          |             |             |   |     |      |
| GO:0010458                        | 1.34E-05 | 83.04807692 | 0.047609162 | 3 | 16  | exit |
| from mitosis                      |          |             |             |   |     |      |

Tissue: Muscle\_Skeletal=>Adipose\_Subcutaneous Type: asymmetric

SourceGene: GEN1(ENSG00000178295.9) GEN1 Holliday junction 5' flap endonuclease

STable4\_20PerPair

|                |         |         |        |         |        |         |         |          |        |      |
|----------------|---------|---------|--------|---------|--------|---------|---------|----------|--------|------|
| TargetGeneSet: | RPL22   | FBX06   | RPL5   | RP11    | PPM1J  | RP1     | GAS5    | GEN1     |        |      |
| SLC40A1        | FAM126B | NBEAL1  | RPL32  | RPL15   | RPL14  | APPL1   | RAB6B   | GRK7     | RPS3A  | TAF9 |
| SMN1           | BTF3    | CAMLG   | CTNNA1 | CTB     | SRPK1  | IGFBP3  | C7orf57 | RPS3AP26 |        |      |
| PTCD1          | RPL30   | RPS3AP5 | RPP30  | RPL27A  | PFDN5  | CDK2    | ARPC3   | DGKH     | ATP7B  |      |
| RAB15          | EXD2    | PSMC1   | TYRO3  | TP53BP1 | ATP8B4 | RPS3AP6 | FURIN   | SGSM2    | RPL26  |      |
| MPRIIP         | RPL23A  | RPL19   | AOC3   | PGS1    | CTD    | RPL17   | RPL36   | PRKACA   | RPL13A |      |
| RPS11          | ASMT    | UXT     | RPS4X  | RBM41   | RPL10  |         |         |          |        |      |

| GOBPID                                                         | Pvalue   | OddsRatio | ExpCount    | Count       | Size | Term |
|----------------------------------------------------------------|----------|-----------|-------------|-------------|------|------|
| GO:0006415                                                     | 6.62E-26 |           | 99.73751024 | 0.314857103 | 17   | 91   |
| translational termination                                      |          |           |             |             |      |      |
| GO:0006414                                                     | 9.16E-25 |           | 83.78822314 | 0.363296658 | 17   | 105  |
| translational elongation                                       |          |           |             |             |      |      |
| GO:0006614                                                     | 9.16E-25 |           | 83.78822314 | 0.363296658 | 17   | 105  |
| SRP-dependent cotranslational protein targeting to membrane    |          |           |             |             |      |      |
| GO:0006613                                                     | 1.09E-24 |           | 82.84099421 | 0.366756626 | 17   | 106  |
| cotranslational protein targeting to membrane                  |          |           |             |             |      |      |
| GO:0045047                                                     | 1.09E-24 |           | 82.84099421 | 0.366756626 | 17   | 106  |
| protein targeting to ER                                        |          |           |             |             |      |      |
| GO:0072599                                                     | 1.09E-24 |           | 82.84099421 | 0.366756626 | 17   | 106  |
| establishment of protein localization to endoplasmic reticulum |          |           |             |             |      |      |

STable4\_20PerPair

|                                                                       |          |             |             |    |     |
|-----------------------------------------------------------------------|----------|-------------|-------------|----|-----|
| GO:0070972                                                            | 7.59E-24 | 72.93729373 | 0.408276244 | 17 | 118 |
| protein localization to endoplasmic reticulum                         |          |             |             |    |     |
| GO:0000184                                                            | 8.84E-24 | 72.21717172 | 0.411736212 | 17 | 119 |
| "nuclear-transcribed mRNA catabolic process, nonsense-mediated decay" |          |             |             |    |     |
| GO:0019080                                                            | 6.16E-22 | 54.84825871 | 0.522455193 | 17 | 151 |
| viral genome expression                                               |          |             |             |    |     |
| GO:0019083                                                            | 6.16E-22 | 54.84825871 | 0.522455193 | 17 | 151 |
| viral transcription                                                   |          |             |             |    |     |
| GO:0019058                                                            | 6.90E-22 | 41.02115033 | 0.799252647 | 19 | 231 |
| viral infectious cycle                                                |          |             |             |    |     |
| GO:0006413                                                            | 6.92E-22 | 54.43815937 | 0.525915162 | 17 | 152 |
| translational initiation                                              |          |             |             |    |     |
| GO:0006612                                                            | 7.76E-22 | 54.03409091 | 0.52937513  | 17 | 153 |
| protein targeting to membrane                                         |          |             |             |    |     |
| GO:0043624                                                            | 7.76E-22 | 54.03409091 | 0.52937513  | 17 | 153 |
| cellular protein complex disassembly                                  |          |             |             |    |     |

STable4\_20PerPair

|                                                    |          |             |             |    |     |      |
|----------------------------------------------------|----------|-------------|-------------|----|-----|------|
| GO:0043241                                         | 1.37E-21 | 52.09972061 | 0.546674971 | 17 | 158 |      |
| protein complex disassembly                        |          |             |             |    |     |      |
| GO:0000956                                         | 4.45E-21 | 48.29206539 | 0.58473462  | 17 | 169 |      |
| nuclear-transcribed mRNA catabolic process         |          |             |             |    |     |      |
| GO:0022415                                         | 6.71E-21 | 36.01124347 | 0.899591724 | 19 | 260 |      |
| viral reproductive process                         |          |             |             |    |     |      |
| GO:0034623                                         | 7.41E-21 | 46.73769543 | 0.602034461 | 17 | 174 |      |
| cellular macromolecular complex disassembly        |          |             |             |    |     |      |
| GO:0006402                                         | 1.10E-20 | 45.56371165 | 0.615874334 | 17 | 178 | mRNA |
| catabolic process                                  |          |             |             |    |     |      |
| GO:0032984                                         | 1.21E-20 | 45.27927422 | 0.619334302 | 17 | 179 |      |
| macromolecular complex disassembly                 |          |             |             |    |     |      |
| GO:0072594                                         | 1.17E-19 | 39.15702479 | 0.705833506 | 17 | 204 |      |
| establishment of protein localization to organelle |          |             |             |    |     |      |
| GO:0006401                                         | 1.27E-19 | 38.94600258 | 0.709293475 | 17 | 205 | RNA  |



STable4\_20PerPair

catabolic process

GO:0016032 4.42E-19 23.52774659 1.560445644 21 451  
viral reproduction

GO:0071845 1.15E-18 29.89074248 0.98263096 18 284  
cellular component disassembly at cellular level

GO:0022411 1.47E-18 29.43958333 0.996470832 18 288  
cellular component disassembly

GO:0006605 9.61E-15 17.20189145 1.640024912 18 474  
protein targeting

GO:0033365 1.55E-13 15.75392079 1.636564944 17 473  
protein localization to organelle

GO:0042273 8.39E-06 102.070922 0.041519618 3 12  
ribosomal large subunit biogenesis

Tissue: Muscle\_skeletal=>Adipose\_Subcutaneous Type: asymmetric

SourceGene: IGKJ5(ENSG00000211593.2) immunoglobulin kappa joining 5

| TargetGeneSet:                                                        |          | STable4_20PerPair |             |             |      |      |  |  |
|-----------------------------------------------------------------------|----------|-------------------|-------------|-------------|------|------|--|--|
| GOBPID                                                                | Pvalue   | OddsRatio         | ExpCount    | Count       | Size | Term |  |  |
| GO:0006415                                                            | 5.26E-15 |                   | 230.5863454 | 0.088159989 | 8    | 91   |  |  |
| translational termination                                             |          |                   |             |             |      |      |  |  |
| GO:0006414                                                            | 1.72E-14 |                   | 197.1134021 | 0.101723064 | 8    | 105  |  |  |
| translational elongation                                              |          |                   |             |             |      |      |  |  |
| GO:0006614                                                            | 1.72E-14 |                   | 197.1134021 | 0.101723064 | 8    | 105  |  |  |
| SRP-dependent cotranslational protein targeting to membrane           |          |                   |             |             |      |      |  |  |
| GO:0006613                                                            | 1.86E-14 |                   | 195.0884354 | 0.102691855 | 8    | 106  |  |  |
| cotranslational protein targeting to membrane                         |          |                   |             |             |      |      |  |  |
| GO:0045047                                                            | 1.86E-14 |                   | 195.0884354 | 0.102691855 | 8    | 106  |  |  |
| protein targeting to ER                                               |          |                   |             |             |      |      |  |  |
| GO:0072599                                                            | 1.86E-14 |                   | 195.0884354 | 0.102691855 | 8    | 106  |  |  |
| establishment of protein localization to endoplasmic reticulum        |          |                   |             |             |      |      |  |  |
| GO:0070972                                                            | 4.48E-14 |                   | 173.6606061 | 0.114317348 | 8    | 118  |  |  |
| protein localization to endoplasmic reticulum                         |          |                   |             |             |      |      |  |  |
| GO:0000184                                                            | 4.80E-14 |                   | 172.0840841 | 0.115286139 | 8    | 119  |  |  |
| "nuclear-transcribed mRNA catabolic process, nonsense-mediated decay" |          |                   |             |             |      |      |  |  |
| GO:0019080                                                            | 3.36E-13 |                   | 133.2773893 | 0.146287454 | 8    | 151  |  |  |
| viral genome expression                                               |          |                   |             |             |      |      |  |  |
| GO:0019083                                                            | 3.36E-13 |                   | 133.2773893 | 0.146287454 | 8    | 151  |  |  |
| viral transcription                                                   |          |                   |             |             |      |      |  |  |
| GO:0006413                                                            | 3.54E-13 |                   | 132.3425926 | 0.147256245 | 8    | 152  |  |  |
| translational initiation                                              |          |                   |             |             |      |      |  |  |
| GO:0006612                                                            | 3.74E-13 |                   | 131.4206897 | 0.148225036 | 8    | 153  |  |  |
| protein targeting to membrane                                         |          |                   |             |             |      |      |  |  |
| GO:0043624                                                            | 3.74E-13 |                   | 131.4206897 | 0.148225036 | 8    | 153  |  |  |
| cellular protein complex disassembly                                  |          |                   |             |             |      |      |  |  |
| GO:0043241                                                            | 4.85E-13 |                   | 126.9955556 | 0.153068992 | 8    | 158  |  |  |
| protein complex disassembly                                           |          |                   |             |             |      |      |  |  |
| GO:0000956                                                            | 8.38E-13 |                   | 118.2277433 | 0.163725694 | 8    | 169  |  |  |

STable4\_20PerPair

nuclear-transcribed mRNA catabolic process

|                                                    |          |             |             |   |     |      |
|----------------------------------------------------|----------|-------------|-------------|---|-----|------|
| GO:0034623                                         | 1.06E-12 | 114.626506  | 0.168569649 | 8 | 174 |      |
| cellular macromolecular complex disassembly        |          |             |             |   |     |      |
| GO:0006402                                         | 1.28E-12 | 111.8980392 | 0.172444814 | 8 | 178 | mRNA |
| catabolic process                                  |          |             |             |   |     |      |
| GO:0032984                                         | 1.34E-12 | 111.2358674 | 0.173413605 | 8 | 179 |      |
| macromolecular complex disassembly                 |          |             |             |   |     |      |
| GO:0072594                                         | 3.84E-12 | 96.87755102 | 0.197633382 | 8 | 204 |      |
| establishment of protein localization to organelle |          |             |             |   |     |      |
| GO:0006401                                         | 3.99E-12 | 96.37901861 | 0.198602173 | 8 | 205 | RNA  |
| catabolic process                                  |          |             |             |   |     |      |
| GO:0019058                                         | 1.04E-11 | 84.98654709 | 0.223790741 | 8 | 231 |      |
| viral infectious cycle                             |          |             |             |   |     |      |
| GO:0022415                                         | 2.70E-11 | 75.05291005 | 0.251885683 | 8 | 260 |      |
| viral reproductive process                         |          |             |             |   |     |      |
| GO:0071845                                         | 5.47E-11 | 68.41062802 | 0.275136669 | 8 | 284 |      |
| cellular component disassembly at cellular level   |          |             |             |   |     |      |
| GO:0022411                                         | 6.12E-11 | 67.41428571 | 0.279011833 | 8 | 288 |      |
| cellular component disassembly                     |          |             |             |   |     |      |
| GO:0016032                                         | 2.16E-09 | 42.11888638 | 0.43692478  | 8 | 451 |      |
| viral reproduction                                 |          |             |             |   |     |      |
| GO:0033365                                         | 3.14E-09 | 40.06308244 | 0.458238184 | 8 | 473 |      |
| protein localization to organelle                  |          |             |             |   |     |      |
| GO:0006605                                         | 3.19E-09 | 39.97424893 | 0.459206975 | 8 | 474 |      |
| protein targeting                                  |          |             |             |   |     |      |

|                                                                     |                           |
|---------------------------------------------------------------------|---------------------------|
| Tissue: Muscle_skeletal=>Adipose_Subcutaneous                       | Type: cluster             |
| SourceGene: MTND1P23(ENSG00000225972.1)                             |                           |
| TargetGeneSet: MTND1P23 MTND2P28                                    | UBR4 KPNA7 RP4 THRAP3 RP1 |
| ATP5F1 HIPK1 CSDE1 ADAR ASH1L MIR555 TKT PRRC2C RP11 CEP350 LAD1    |                           |
| LPGAT1 ASXL2 RHOQ UBC COMMD1 AAK1 TET3 EIF5B UGGT1 MZT2B            |                           |
| RHOQP3 RHOQP2 MZT2A GULP1 HDLBP IL17RC MAP4 RAD54L2 PCNP RPL24      |                           |
| PDCD10 DNAJC19 IQCG RELL1 CISD2 RPL34 RPS3A CTD MRPS36 TBCA ARSB    |                           |
| ERAP1 MAN2A1 HINT1 AFF4 CTB MTND5P11 RPS14 NOL7 GPLD1               |                           |
| HLA-H TAPBP C6orf89 ZFAND3 MTRNR2L9 BCKDHB SNHG5 MRPS12 PHACTR2 RP3 |                           |
| IGF2R FOXK1 CHCHD2 CUX1 TRBV6-5 HOOK3 RBM12B TG CLTA CBWD3 XPA      |                           |
| ATP6V1G1 SETX RPL7A SSNA1 COMMD3 FUT11 RPL27A MTRNR2L8              |                           |
| CCDC85B PACS1 SDHD UBE4A ATP5L DDX6 RPL23AP64 ERC1 C12orf57         |                           |

Stable4\_20PerPair

| GO:ID      | Pvalue | OddsRatio | ExpCount             | Count            | Size              | Term              |
|------------|--------|-----------|----------------------|------------------|-------------------|-------------------|
| GO:0006614 | 14     | 105       | 2.85187993110751e-14 | 23.8361204013378 |                   | 0.770188914261989 |
| GO:0006613 | 14     | 106       | 3.2662520390078e-14  | 23.5753780718336 |                   | 0.77752404677877  |
| GO:0045047 | 14     | 106       | 3.2662520390078e-14  | 23.5753780718336 |                   | 0.77752404677877  |
| GO:0072599 | 14     | 106       | 3.2662520390078e-14  | 23.5753780718336 |                   | 0.77752404677877  |
| GO:0006415 | 13     | 91        | 9.97513105924338e-14 | 25.5681003584229 |                   | 0.667497059027057 |
| GO:0070972 | 14     | 118       | 1.50034564504427e-13 | 20.8375836120401 |                   | 0.86554563698014  |
| GO:0006612 | 15     | 153       | 3.3319676772627e-13  | 16.9696607740086 |                   | 1.12227527506747  |
| GO:0006414 | 105    | 105       | 6.67721192852802e-13 | 21.65603085554   | 0.770188914261989 | 13                |
| GO:0072594 | 16     | 204       | 1.66474874630968e-12 | 13.3872340425532 |                   | 1.49636703342329  |
| GO:0000184 | 13     | 119       | 3.43323659244544e-12 | 18.7773382024751 |                   | 0.872880769496921 |
| GO:0006413 | 14     | 152       | 5.1002164221504e-12  | 15.6661940768746 |                   | 1.11494014255069  |
| GO:0000956 | 14     | 169       | 2.16589459825813e-11 | 13.9312762973352 |                   | 1.23963739533596  |
| GO:0006402 | 14     | 178       | 4.3664296916785e-11  | 13.1584040296925 |                   | 1.30565358798699  |
| GO:0019080 | 13     | 151       | 7.26080401728964e-11 | 14.3907589216145 |                   | 1.10760501003391  |
| GO:0019083 | 13     | 151       | 7.26080401728964e-11 | 14.3907589216145 |                   | 1.10760501003391  |
| GO:0043624 | 13     | 153       | 8.57319919396345e-11 | 14.1831797235023 |                   | 1.12227527506747  |
| GO:0043241 | 158    | 158       | 1.28533505959621e-10 | 13.689284390063  | 1.15895093765137  | 13                |
| GO:0006401 | 14     | 205       | 2.87805973677657e-10 | 11.2768040063738 |                   | 1.50370216594007  |
| GO:0034623 | 13     | 174       | 4.29033958791117e-10 | 12.3149669404929 |                   | 1.27631305791987  |
| GO:0032984 | 13     | 179       | 6.09615116983799e-10 | 11.9398238113745 |                   | 1.31298872050377  |
| GO:0071845 | 15     | 284       | 2.27349123483779e-09 | 8.62535234282446 |                   | 2.08317763476576  |
| GO:0022411 | 15     | 288       | 2.75236896680963e-09 | 8.49655838666828 |                   | 2.11251816483288  |
| GO:0022415 | 14     | 260       | 6.35358966199288e-09 | 8.72154471544715 |                   | 1.90713445436302  |
| GO:0033365 | 18     | 473       | 9.09854180531894e-09 | 6.24425574425574 |                   | 3.46951768043734  |
| GO:0019058 | 13     | 231       | 1.3585501099947e-08  | 9.05844924533886 |                   | 1.69441561137638  |
| GO:0006605 | 17     | 474       | 5.84999051009004e-08 | 5.80473532810464 |                   | 3.47685281295412  |
| GO:0016032 | 15     | 451       | 9.88474098314292e-07 | 5.25846859562456 |                   | 3.30814476506816  |

Tissue: Muscle\_skeletal=>Adipose\_Subcutaneous Type: asymmetric

STable4\_20PerPair

SourceGene: MTND2P28(ENSG00000225630.1) pseudogene

|                |          |           |          |          |         |         |          |           |         |      |
|----------------|----------|-----------|----------|----------|---------|---------|----------|-----------|---------|------|
| TargetGeneSet: | MTND1P23 | MTND2P28  | RPL22    | DFFA     | VPS13D  | DDI2    |          |           |         |      |
| C1orf134       | UBR4     | ARID1A    | KPNA7    | THRAP3   | MFI2    | RP1     | RPS8     | RPS15AP10 |         |      |
| RPL5           | RP11     | SORT1     | HIPK1    | NBPF16   | JTB     | RPS27   | ASH1L    | POU2F1    | PRRC2C  |      |
| CEP350         | LPGAT1   | KIDINS220 | NBAS     | ASXL2    | PPP1CB  | RHOQ    | UBC      | USP34     | AAK1    |      |
| TET3           | DCTN1    | COA5      | EIF5B    | RANBP2   | UGGT1   | MZT2B   | RHOQP3   | RHOQP2    | PLEKHM3 |      |
| HDLBP          | NR2C2    | RPL15     | MAP4     | LAMB2    | RAD54L2 | RN5S132 | RPL29    | SEMA3G    | CTD     | PCNP |
| RPL24          | DNAJC13  | PDCD10    | PHC3     | DNAJC19  | EIF4G1  | HTT     | RP13     | RELL1     | OCIAD1  |      |
| COPS4          | AIMP1    | RPL34     | RPS3A    | NIPBL    | MRPS36  | TBCA    | ARSB     | ERAP1     | MAN2A1  | APC  |
| HINT1          | AFF4     | SKP1      | CTB      | MTND5P11 | KDM3B   | PCDHGA6 | PCDHGC5  | RPS14     | NOL7    |      |
| GPLD1          | HLA-H    | TAPBP     | RPS10    | RPL10A   | ZFAND3  | DST     | MTRNR2L9 | WDR11     |         |      |
| SNHG5          | ASCC3    | MRPS12    | PHACTR2  | RP3      | IGF2R   | FOXK1   | PHF14    | THSD7A    | MALSU1  |      |
| CHCHD2         | LMTK2    | RPS3AP26  | BUD31    | SPDYE2   | TNPO3   | HIPK2   | MLL3     | KAT6A     |         |      |
| HOOK3          | RPS20    | ASPH      | RPL30    | TG       | TRAPPC9 | NFIB    | TLN1     | CLTA      | XPA     |      |
| RPL12          | SETX     | RPL7A     | FAM208B  | COMMD3   | PRINS   | FUT11   | RPS24    | EIF6      | CD151   |      |
| RPL27A         | MTRNR2L8 | TSG101    | C11orf31 | GANAB    | PACS1   | PPP6R3  | TMEM126B |           |         |      |

| STable4_20PerPair |          |           |          |           |         |          |        |           |            |
|-------------------|----------|-----------|----------|-----------|---------|----------|--------|-----------|------------|
| GOBPID            | Pvalue   | OddsRatio | ExpCount | Count     | Size    | Term     |        |           |            |
| TMEM126A          |          | UBE4A     | DDX6     | RPL23AP64 | APPL2   | KDM5A    | ERC1   | C12orf57  |            |
| PHB2              | SCAF11   | MLL4      | PFDN5    | TMBIM4    | RBMS1P1 | C12orf73 | ACAD10 | RPL6      |            |
| SBN01             | GOLGA3   | ESD       | COMMD6   | HMGB3P4   | CHD8    | NKX2-1   | NIN    | C14orf102 |            |
| CYFIP1            | HERC2    | HERC2P10  |          | C15orf40  |         | SEC11A   | LRRK1  | JMJD8     | NME3       |
| SPSB3             | ECI1     | MGRN1     | EMP2     | RPS15A    | ZNF771  | SRCAP    | ATXN1L | CDYL2     | BANP       |
| VPS53             | METTL16  | ZZEF1     | ALOX12   | SLC35G6   | RPL26   | SUPT6H   | RPL23A | TAOK1     | TAF15      |
| ZNHIT3            | RPL19    | CDK12     | WIPF2    | RPL27     | ANKRD40 | CLTC     | MED13  | TNRC6C    | ROCK1P1    |
| ANKRD12           | C18orf21 |           | C18orf32 |           | RPL17   | ZNF407   | ZBTB7A | ZNF121    | HNRNPA1P10 |
| BRD4              | RPSAP58  | ARHGAP35  |          | RPL18     | RPL13A  | MYH7B    | ZNF587 | ZNF8      | RPS5 HM13  |
| KIF3B             | NCOA6    | RALGAPB   | NCOA3    | ADNP      | TSHZ2   | RPL12P4  | PCMTD2 | SON       | PEX26      |
| PI4KA             | YDJC     | CTA       | HMGB1P10 |           | MPST    | RPL3     | TNRC6B | EP300     | VCX3B      |
| USP9X             | HUWE1    | GNL3L     | RPS4X    | APOOL     | RPL39   | THOC2    | XIAP   | HCFC1     | RPL10      |

GO:0006415 translational termination 3.38E-39 50.17851788 1.221645561 33 91

|                                                             |          | STable4_20PerPair |             |    |     |
|-------------------------------------------------------------|----------|-------------------|-------------|----|-----|
| GO:0006614                                                  | 2.14E-38 | 42.45809859       | 1.409591032 | 34 | 105 |
| SRP-dependent cotranslational protein targeting to membrane |          |                   |             |    |     |

|                                               |          |             |             |    |     |
|-----------------------------------------------|----------|-------------|-------------|----|-----|
| GO:0006613                                    | 3.11E-38 | 41.86545139 | 1.423015708 | 34 | 106 |
| cotranslational protein targeting to membrane |          |             |             |    |     |

|                         |          |             |             |    |     |
|-------------------------|----------|-------------|-------------|----|-----|
| GO:0045047              | 3.11E-38 | 41.86545139 | 1.423015708 | 34 | 106 |
| protein targeting to ER |          |             |             |    |     |

STable4\_20PerPair

|                                                                |          |             |             |    |     |
|----------------------------------------------------------------|----------|-------------|-------------|----|-----|
| GO:0072599                                                     | 3.11E-38 | 41.86545139 | 1.423015708 | 34 | 106 |
| establishment of protein localization to endoplasmic reticulum |          |             |             |    |     |

|                          |          |             |             |    |     |
|--------------------------|----------|-------------|-------------|----|-----|
| GO:0006414               | 8.90E-37 | 40.38172878 | 1.409591032 | 33 | 105 |
| translational elongation |          |             |             |    |     |



STable4\_20PerPair

|                                               |          |             |             |    |     |
|-----------------------------------------------|----------|-------------|-------------|----|-----|
| GO:0070972                                    | 2.06E-36 | 35.85431548 | 1.584111826 | 34 | 118 |
| protein localization to endoplasmic reticulum |          |             |             |    |     |

|                                                                       |          |       |             |    |     |
|-----------------------------------------------------------------------|----------|-------|-------------|----|-----|
| GO:0000184                                                            | 2.85E-36 | 35.43 | 1.597536503 | 34 | 119 |
| "nuclear-transcribed mRNA catabolic process, nonsense-mediated decay" |          |       |             |    |     |

|                               |          |             |             |    |     |
|-------------------------------|----------|-------------|-------------|----|-----|
| GO:0006612                    | 5.07E-35 | 27.53651412 | 2.053975503 | 36 | 153 |
| protein targeting to membrane |          |             |             |    |     |

STable4\_20PerPair

|                          |          |             |             |    |     |
|--------------------------|----------|-------------|-------------|----|-----|
| GO:0006413               | 1.07E-33 | 26.60323604 | 2.040550827 | 35 | 152 |
| translational initiation |          |             |             |    |     |

|                         |          |             |            |    |     |
|-------------------------|----------|-------------|------------|----|-----|
| GO:0019080              | 2.21E-32 | 25.68162393 | 2.02712615 | 34 | 151 |
| viral genome expression |          |             |            |    |     |

STable4\_20PerPair

|                     |          |             |            |    |     |
|---------------------|----------|-------------|------------|----|-----|
| GO:0019083          | 2.21E-32 | 25.68162393 | 2.02712615 | 34 | 151 |
| viral transcription |          |             |            |    |     |

|                                      |          |             |             |    |     |
|--------------------------------------|----------|-------------|-------------|----|-----|
| GO:0043624                           | 3.58E-32 | 25.24642857 | 2.053975503 | 34 | 153 |
| cellular protein complex disassembly |          |             |             |    |     |

|                                            |          |             |             |    |     |
|--------------------------------------------|----------|-------------|-------------|----|-----|
| GO:0000956                                 | 5.79E-32 | 23.20027222 | 2.268770327 | 35 | 169 |
| nuclear-transcribed mRNA catabolic process |          |             |             |    |     |

STable4\_20PerPair

|                             |          |             |             |    |     |
|-----------------------------|----------|-------------|-------------|----|-----|
| GO:0043241                  | 1.16E-31 | 24.21985887 | 2.121098886 | 34 | 158 |
| protein complex disassembly |          |             |             |    |     |

|                                                    |          |             |             |    |     |
|----------------------------------------------------|----------|-------------|-------------|----|-----|
| GO:0072594                                         | 1.54E-31 | 19.88367215 | 2.738634005 | 37 | 204 |
| establishment of protein localization to organelle |          |             |             |    |     |

STable4\_20PerPair

|                                             |          |             |            |    |     |
|---------------------------------------------|----------|-------------|------------|----|-----|
| GO:0034623                                  | 1.71E-31 | 22.35781186 | 2.33589371 | 35 | 174 |
| cellular macromolecular complex disassembly |          |             |            |    |     |

|                   |          |             |             |    |     |      |
|-------------------|----------|-------------|-------------|----|-----|------|
| GO:0006402        | 3.96E-31 | 21.72626116 | 2.389592416 | 35 | 178 | mRNA |
| catabolic process |          |             |             |    |     |      |

|                                    |          |            |             |    |     |
|------------------------------------|----------|------------|-------------|----|-----|
| GO:0032984                         | 4.87E-31 | 21.5738557 | 2.403017092 | 35 | 179 |
| macromolecular complex disassembly |          |            |             |    |     |

STable4\_20PerPair

|                   |          |             |             |    |     |     |
|-------------------|----------|-------------|-------------|----|-----|-----|
| GO:0006401        | 6.84E-29 | 18.24065853 | 2.752058681 | 35 | 205 | RNA |
| catabolic process |          |             |             |    |     |     |

|                            |          |             |             |    |     |  |
|----------------------------|----------|-------------|-------------|----|-----|--|
| GO:0022415                 | 9.58E-29 | 15.39991915 | 3.490415888 | 38 | 260 |  |
| viral reproductive process |          |             |             |    |     |  |

STable4\_20PerPair

|                        |          |             |            |    |     |
|------------------------|----------|-------------|------------|----|-----|
| GO:0019058             | 4.85E-27 | 15.79177898 | 3.10110027 | 35 | 231 |
| viral infectious cycle |          |             |            |    |     |

|                                   |          |             |             |    |     |
|-----------------------------------|----------|-------------|-------------|----|-----|
| GO:0033365                        | 6.50E-26 | 9.758279496 | 6.349871981 | 45 | 473 |
| protein localization to organelle |          |             |             |    |     |

|                                                  |          |             |             |    |     |
|--------------------------------------------------|----------|-------------|-------------|----|-----|
| GO:0071845                                       | 4.98E-25 | 12.87066149 | 3.812608124 | 36 | 284 |
| cellular component disassembly at cellular level |          |             |             |    |     |

STable4\_20PerPair

|                                |          |             |            |    |     |
|--------------------------------|----------|-------------|------------|----|-----|
| GO:0022411                     | 8.16E-25 | 12.66274864 | 3.86630683 | 36 | 288 |
| cellular component disassembly |          |             |            |    |     |

|                   |          |             |             |    |     |
|-------------------|----------|-------------|-------------|----|-----|
| GO:0006605        | 6.46E-24 | 9.135047095 | 6.363296658 | 43 | 474 |
| protein targeting |          |             |             |    |     |



STable4\_20PerPair

GO:0016032 7.82E-23 9.050326797 6.054529098 41 451  
 viral reproduction

Tissue: Muscle\_Skeletal=>Adipose\_Subcutaneous Type: cluster  
 SourceGene: MTND2P28(ENSG00000225630.1)  
 TargetGeneSet: MTND1P23 MTND2P28

|          |          |           |          |           |         |          |          |           |            |      |
|----------|----------|-----------|----------|-----------|---------|----------|----------|-----------|------------|------|
| C1orf134 | UBR4     | ARID1A    | KPNA7    | THRAP3    | RPL22   | DFFA     | VPS13D   | DDI2      |            |      |
| RPL5     | RP11     | SORT1     | HIPK1    | NBPF16    | JTB     | RPS27    | ASH1L    | POU2F1    | PRRC2C     |      |
| CEP350   | LPGAT1   | KIDINS220 | NBAS     | ASXL2     | PPP1CB  | RHOQ     | UBC      | USP34     | AAK1       |      |
| TET3     | DCTN1    | COA5      | EIF5B    | RANBP2    | UGGT1   | MZT2B    | RHOQP3   | RHOQP2    | PLEKHM3    |      |
| HDLBP    | NR2C2    | RPL15     | MAP4     | LAMB2     | RAD54L2 | RN5S132  | RPL29    | SEMA3G    | CTD        | PCNP |
| RPL24    | DNAJC13  | PDCD10    | PHC3     | DNAJC19   | EIF4G1  | HTT      | RP13     | RELL1     | OCIAD1     |      |
| COPS4    | AIMP1    | RPL34     | RPS3A    | NIPBL     | MRPS36  | TBCA     | ARSB     | ERAP1     | MAN2A1     | APC  |
| HINT1    | AFF4     | SKP1      | CTB      | MTND5P11  |         | KDM3B    | PCDHGA6  | PCDHGC5   | RPS14      | NOL7 |
| GPLD1    | HLA-H    | TAPBP     | RPS10    | RPL10A    | ZFAND3  | DST      | MTRNR2L9 |           | WDR11      |      |
| SNHG5    | ASCC3    | MRPS12    | PHACTR2  | RP3       | IGF2R   | FOXK1    | PHF14    | THSD7A    | MALSU1     |      |
| CHCHD2   | LMTK2    | RPS3AP26  |          | BUD31     | SPDYE2  | TNPO3    | HIPK2    | MLL3      | KAT6A      |      |
| HOOK3    | RPS20    | ASP       | RPL30    | TG        | TRAPPC9 | NFIB     | TLN1     | CLTA      | XPA        |      |
| RPL12    | SETX     | RPL7A     | FAM208B  | COMMD3    | PRINS   | FUT11    | RPS24    | EIF6      | CD151      |      |
| RPL27A   | MTRNR2L8 |           | TSG101   | C11orf31  |         | GANAB    | PACS1    | PPP6R3    | TMEM126B   |      |
| TMEM126A |          | UBE4A     | DDX6     | RPL23AP64 |         | APPL2    | KDM5A    | ERC1      | C12orf57   |      |
| PHB2     | SCAF11   | MLL4      | PFDN5    | TMBIM4    | RBMS1P1 | C12orf73 |          | ACAD10    | RPL6       |      |
| SBN01    | GOLGA3   | ESD       | COMMD6   | HMG3P4    | CHD8    | NKX2-1   | NIN      | C14orf102 |            |      |
| CYFIP1   | HERC2    | HERC2P10  |          | C15orf40  |         | SEC11A   | LRRK1    | JMJD8     | NME3       |      |
| SPSB3    | ECI1     | MGRN1     | EMP2     | RPS15A    | ZNF771  | SRCAP    | ATXN1L   | CDYL2     | BANP       |      |
| VPS53    | METTL16  | ZZEF1     | ALOX12   | SLC35G6   | RPL26   | SUPT6H   | RPL23A   | TAOK1     | TAF15      |      |
| ZNHIT3   | RPL19    | CDK12     | WIPF2    | RPL27     | ANKRD40 | CLTC     | MED13    | TNRC6C    | ROCK1P1    |      |
| ANKRD12  | C18orf21 |           | C18orf32 |           | RPL17   | ZNF407   | ZBTB7A   | ZNF121    | HNRNPA1P10 |      |
| BRD4     | RPSAP58  | ARHGAP35  |          | RPL18     | RPL13A  | MYH7B    | ZNF587   | ZNF8      | RPS5       | HM13 |
| KIF3B    | NCOA6    | RALGAPB   | NCOA3    | ADNP      | TSHZ2   | RPL12P4  | PCMTD2   | SON       | PEX26      |      |
| PI4KA    | YDJC     | CTA       | HMGB1P10 |           | MPST    | RPL3     | TNRC6B   | EP300     | VCX3B      |      |
| USP9X    | HUWE1    | GNL3L     | RPS4X    | APOOL     | RPL39   | THOC2    | XIAP     | HCFC1     | RPL10      |      |

GOBPID Pvalue OddsRatio ExpCount Count Size Term  
 GO:0006415 3.37848132117428e-39 50.1785178839152 1.22164556086084  
 33 91 translational termination  
 GO:0006614 2.13651690835942e-38 42.4580985915493 1.40959103176251  
 34 105 SRP-dependent cotranslational protein targeting to membrane

Stable4\_20PerPair

|                                                                     |                                                                |                        |                  |     |
|---------------------------------------------------------------------|----------------------------------------------------------------|------------------------|------------------|-----|
| GO:0006613                                                          | 3.11137614749354e-38                                           | 41.8654513888889       | 1.42301570825548 |     |
| 34 106                                                              | cotranslational protein targeting to membrane                  |                        |                  |     |
| GO:0045047                                                          | 3.11137614749354e-38                                           | 41.8654513888889       | 1.42301570825548 |     |
| 34 106                                                              | protein targeting to ER                                        |                        |                  |     |
| GO:0072599                                                          | 3.11137614749354e-38                                           | 41.8654513888889       | 1.42301570825548 |     |
| 34 106                                                              | establishment of protein localization to endoplasmic reticulum |                        |                  |     |
| GO:0006414                                                          | 8.9001924638916e-37                                            | 40.3817287784679       | 1.40959103176251 |     |
| 33 105                                                              | translational elongation                                       |                        |                  |     |
| GO:0070972                                                          | 2.06153783064841e-36                                           | 35.8543154761905       | 1.5841118261712  | 34  |
| 118                                                                 | protein localization to endoplasmic reticulum                  |                        |                  |     |
| GO:0000184                                                          | 2.85488460075027e-36                                           | 35.43 1.59753650266418 | 34               | 119 |
| nuclear-transcribed mRNA catabolic process, nonsense-mediated decay |                                                                |                        |                  |     |
| GO:0006612                                                          | 5.06588451374648e-35                                           | 27.5365141187926       | 2.05397550342537 |     |
| 36 153                                                              | protein targeting to membrane                                  |                        |                  |     |
| GO:0006413                                                          | 1.07329332825106e-33                                           | 26.6032360371983       | 2.04055082693239 |     |
| 35 152                                                              | translational initiation                                       |                        |                  |     |
| GO:0019080                                                          | 2.21174037966493e-32                                           | 25.6816239316239       | 2.02712615043942 |     |
| 34 151                                                              | viral genome expression                                        |                        |                  |     |
| GO:0019083                                                          | 2.21174037966493e-32                                           | 25.6816239316239       | 2.02712615043942 |     |
| 34 151                                                              | viral transcription                                            |                        |                  |     |
| GO:0043624                                                          | 3.5839345031581e-32                                            | 25.2464285714286       | 2.05397550342537 |     |
| 34 153                                                              | cellular protein complex disassembly                           |                        |                  |     |
| GO:0000956                                                          | 5.78680390021384e-32                                           | 23.2002722237867       | 2.26877032731299 |     |
| 35 169                                                              | nuclear-transcribed mRNA catabolic process                     |                        |                  |     |
| GO:0043241                                                          | 1.16020677849e-31                                              | 24.2198588709677       | 2.12109888589025 |     |
| 34 158                                                              | protein complex disassembly                                    |                        |                  |     |
| GO:0072594                                                          | 1.54032264360333e-31                                           | 19.8836721461536       | 2.73863400456716 |     |
| 37 204                                                              | establishment of protein localization to organelle             |                        |                  |     |
| GO:0034623                                                          | 1.70970250788406e-31                                           | 22.3578118637166       | 2.33589370977787 |     |
| 35 174                                                              | cellular macromolecular complex disassembly                    |                        |                  |     |
| GO:0006402                                                          | 3.96285383659401e-31                                           | 21.7262611602234       | 2.38959241574977 |     |
| 35 178                                                              | mRNA catabolic process                                         |                        |                  |     |
| GO:0032984                                                          | 4.87277837579616e-31                                           | 21.573855695318        | 2.40301709224275 | 35  |
| 179                                                                 | macromolecular complex disassembly                             |                        |                  |     |
| GO:0006401                                                          | 6.84005738847217e-29                                           | 18.240658527562        | 2.75205868106013 | 35  |
| 205                                                                 | RNA catabolic process                                          |                        |                  |     |
| GO:0022415                                                          | 9.58139378065215e-29                                           | 15.3999191499191       | 3.49041588817383 |     |
| 38 260                                                              | viral reproductive process                                     |                        |                  |     |
| GO:0019058                                                          | 4.85276860766041e-27                                           | 15.7917789757412       | 3.10110026987752 |     |
| 35 231                                                              | viral infectious cycle                                         |                        |                  |     |
| GO:0033365                                                          | 6.50112578404979e-26                                           | 9.75827949570344       | 6.34987198117777 |     |
| 45 473                                                              | protein localization to organelle                              |                        |                  |     |
| GO:0071845                                                          | 4.98394237888988e-25                                           | 12.8706614944875       | 3.81260812400526 |     |
| 36 284                                                              | cellular component disassembly at cellular level               |                        |                  |     |
| GO:0022411                                                          | 8.16468621454925e-25                                           | 12.6627486437613       | 3.86630682997716 |     |
| 36 288                                                              | cellular component disassembly                                 |                        |                  |     |
| GO:0006605                                                          | 6.45691417132307e-24                                           | 9.13504709515834       | 6.36329665767075 |     |
| 43 474                                                              | protein targeting                                              |                        |                  |     |
| GO:0016032                                                          | 7.82496057998823e-23                                           | 9.05032679738562       | 6.0545290983323  | 41  |
| 451                                                                 | viral reproduction                                             |                        |                  |     |
| Tissue: Muscle_Skeletal=>Adipose_Subcutaneous Type: cluster         |                                                                |                        |                  |     |

STable4\_20PerPair

SourceGene: MTRNR2L8(ENSG00000255823.1) humanin-like protein 8

TargetGeneSet: MTND2P28 NMNAT1 RP4 THRAP3 RPS8 RPS15AP10 RPL5  
 RP11 ASH1L PRRC2C CEP350 RPS7 ADAM18 EIF5B MAP4K4 UGGT1 MZT2B  
 RHOQP3 GIGYF2 RPL15 MAP4 RAD54L2 RPL29 APPL1 RPL10AP6 TMF1 PCNP  
 RPL24 C3orf15 PHC3 DNAJC19 LMLN-AS1 HTT BOD1L RELL1 ZBTB12B  
 RPL34 CTD ERAP1 PTMAP2 AFF4 CTB MTND5P11 RPL15P3 TAPBP  
 ZFAND3 MTRNR2L9 WDR11 IYD IGF2R STARD3NL RPS3AP26  
 TNPO3 TRPV6 MLL3 DRP2 HMBOX1 HOOK3 ARFGEF1 RBM12B TG NIPSNAP3A  
 SETX EEF1A1P5 RPL7A RPS24 RPS3AP5 EMX2 RPL27A MTRNR2L8  
 CKAP5 TMEM126B UBE4A DDX6 SIAE C12orf57 SCAF11 MLL4  
 PFDN5 TMBIM4 EEA1 RP3 RPL6 RP1 SBN01 RPSAP54 LATS2 MRP63  
 GTF3A DIS3 HMGB3P4 CCNB1IP1 C14orf21 YLPM1 CCNK HERC2P10  
 CALML4 MYO9A SEC11A ASB9P1 LRRK1 MPG NME3 NDUFB10 RPS15A LONP2  
 NFATC3 RPL13 VPS53 WDR81 RPL26 TOM1L2 RPS7P1 SUPT6H RPL23A TAOK1  
 NKIRAS2 STAT5A RPL27 RPS7P11 NFE2L1 CLTC MED13 GPR142 TNRC6C FN3KRP  
 ROCK1P1 ANKRD12 FAM108A1 ZNF121 BRD4 RPSAP58 C19orf54 RPL18  
 NUCB1 ZNF587 RPS5 REM1 KIF3B NCOA3 TSHZ2 RPL12P4 UBE2G2 FAM108A5P  
 HMGB1P10 MPST UQCRFS1P1 TNRC6B DYNLT3 USP9X GNL3L COX7B  
 PGAM4 RPL39

GOBPID Pvalue OddsRatio ExpCount Count Size Term

GO:0006614 3.61E-23 38.56389452 0.777454847 20 105  
 SRP-dependent cotranslational protein targeting to membrane

STable4\_20PerPair

|                                               |          |             |             |    |     |
|-----------------------------------------------|----------|-------------|-------------|----|-----|
| GO:0006613                                    | 4.43E-23 | 38.11280406 | 0.784859179 | 20 | 106 |
| cotranslational protein targeting to membrane |          |             |             |    |     |

|                         |          |             |             |    |     |
|-------------------------|----------|-------------|-------------|----|-----|
| GO:0045047              | 4.43E-23 | 38.11280406 | 0.784859179 | 20 | 106 |
| protein targeting to ER |          |             |             |    |     |

|                                                                |          |             |             |    |     |
|----------------------------------------------------------------|----------|-------------|-------------|----|-----|
| GO:0072599                                                     | 4.43E-23 | 38.11280406 | 0.784859179 | 20 | 106 |
| establishment of protein localization to endoplasmic reticulum |          |             |             |    |     |

|                           |          |            |             |    |    |
|---------------------------|----------|------------|-------------|----|----|
| GO:0006415                | 7.32E-23 | 42.7979798 | 0.673794201 | 19 | 91 |
| translational termination |          |            |             |    |    |

STable4\_20PerPair

|                                               |          |             |             |    |     |
|-----------------------------------------------|----------|-------------|-------------|----|-----|
| GO:0070972                                    | 4.34E-22 | 33.41778091 | 0.873711162 | 20 | 118 |
| protein localization to endoplasmic reticulum |          |             |             |    |     |

|                          |          |             |             |    |     |
|--------------------------|----------|-------------|-------------|----|-----|
| GO:0006414               | 1.36E-21 | 35.79571882 | 0.777454847 | 19 | 105 |
| translational elongation |          |             |             |    |     |

|                                                                       |          |             |             |    |     |
|-----------------------------------------------------------------------|----------|-------------|-------------|----|-----|
| GO:0000184                                                            | 1.68E-20 | 30.75409091 | 0.881115494 | 19 | 119 |
| "nuclear-transcribed mRNA catabolic process, nonsense-mediated decay" |          |             |             |    |     |

|                                            |          |            |             |    |     |
|--------------------------------------------|----------|------------|-------------|----|-----|
| GO:0000956                                 | 3.16E-20 | 23.4220616 | 1.251332088 | 21 | 169 |
| nuclear-transcribed mRNA catabolic process |          |            |             |    |     |

STable4\_20PerPair

|                                                    |          |             |             |    |     |      |
|----------------------------------------------------|----------|-------------|-------------|----|-----|------|
| GO:0006413                                         | 8.40E-20 | 24.75095785 | 1.125458446 | 20 | 152 |      |
| translational initiation                           |          |             |             |    |     |      |
| GO:0072594                                         | 8.52E-20 | 20.13988365 | 1.510483704 | 22 | 204 |      |
| establishment of protein localization to organelle |          |             |             |    |     |      |
| GO:0006402                                         | 9.54E-20 | 22.06539772 | 1.317971075 | 21 | 178 | mRNA |
| catabolic process                                  |          |             |             |    |     |      |
| GO:0006612                                         | 9.61E-20 | 24.56313197 | 1.132862778 | 20 | 153 |      |
| protein targeting to membrane                      |          |             |             |    |     |      |

STable4\_20PerPair

|                         |          |             |             |    |     |     |
|-------------------------|----------|-------------|-------------|----|-----|-----|
| GO:0019080              | 1.80E-18 | 23.24621212 | 1.118054114 | 19 | 151 |     |
| viral genome expression |          |             |             |    |     |     |
| GO:0019083              | 1.80E-18 | 23.24621212 | 1.118054114 | 19 | 151 |     |
| viral transcription     |          |             |             |    |     |     |
| GO:0006401              | 1.87E-18 | 18.7917088  | 1.517888035 | 21 | 205 | RNA |
| catabolic process       |          |             |             |    |     |     |
| GO:0043624              | 2.32E-18 | 22.89603121 | 1.132862778 | 19 | 153 |     |

cellular protein complex disassembly STable4\_20PerPair

|                             |          |             |             |    |     |
|-----------------------------|----------|-------------|-------------|----|-----|
| GO:0043241                  | 4.32E-18 | 22.06466645 | 1.169884437 | 19 | 158 |
| protein complex disassembly |          |             |             |    |     |

|                                             |          |             |             |    |     |
|---------------------------------------------|----------|-------------|-------------|----|-----|
| GO:0034623                                  | 2.74E-17 | 19.76473607 | 1.288353747 | 19 | 174 |
| cellular macromolecular complex disassembly |          |             |             |    |     |

|                                    |          |             |             |    |     |
|------------------------------------|----------|-------------|-------------|----|-----|
| GO:0032984                         | 4.69E-17 | 19.14034091 | 1.325375407 | 19 | 179 |
| macromolecular complex disassembly |          |             |             |    |     |



|                                   |          |             | STable4_20PerPair |    |     |
|-----------------------------------|----------|-------------|-------------------|----|-----|
| GO:0033365                        | 5.60E-16 | 9.979341011 | 3.502248979       | 26 | 473 |
| protein localization to organelle |          |             |                   |    |     |

|                        |          |             |             |    |     |
|------------------------|----------|-------------|-------------|----|-----|
| GO:0019058             | 5.53E-15 | 14.39258148 | 1.710400664 | 19 | 231 |
| viral infectious cycle |          |             |             |    |     |

|                   |          |             |             |    |     |
|-------------------|----------|-------------|-------------|----|-----|
| GO:0006605        | 5.81E-15 | 9.434923135 | 3.509653311 | 25 | 474 |
| protein targeting |          |             |             |    |     |

|                            |          |             |             |    |     |
|----------------------------|----------|-------------|-------------|----|-----|
| GO:0022415                 | 4.81E-14 | 12.63471332 | 1.925126289 | 19 | 260 |
| viral reproductive process |          |             |             |    |     |

STable4\_20PerPair

GO:0071845 2.37E-13 11.47088336 2.102830254 19 284  
cellular component disassembly at cellular level

GO:0022411 3.05E-13 11.29710206 2.132447581 19 288  
cellular component disassembly

GO:0016032 7.29E-10 6.953072391 3.339353678 19 451  
viral reproduction

GO:0022613 8.53E-07 7.565712617 1.665974673 11 225  
ribonucleoprotein complex biogenesis

STable4\_20PerPair

GO:0071843 1.54E-06 7.094115497 1.769635319 11 239  
cellular component biogenesis at cellular level

GO:0042254 1.46E-05 8.139838097 1.10324545 8 149  
ribosome biogenesis

Tissue: Muscle\_Skeletal=>Adipose\_Subcutaneous Type: asymmetric  
SourceGene: RP1-199J3.5(ENSG00000219755.1)  
TargetGeneSet: EIF3I NFYC GAS5 EIF3FP3 HAT1 RPL24 EIF2S1 RP11  
RIOK2 GNB2L1 RPL15P3 CYC1 STOML2 FXN SNORA65 RPL7A MMS19 BCCIP PHB2  
PPP1CC RP13 RPS15A KARS RPS7P1 RPL19 RPS2P48 MRPL38 TIMM21 RPL18 CA11  
RPL13A PCMTD2 C21orf59 EIF3L RPL3 RP3 PQBP1  
GOBPID Pvalue OddsRatio ExpCount Count Size Term  
GO:0006413 3.51044963663819e-14 67.0610328638498 0.262957580790257  
10 152 translational initiation  
GO:0006415 1.36125432420966e-10 66.3981481481482 0.157428551657325  
7 91 translational termination  
GO:0006414 3.76966412411771e-10 56.8571428571429 0.181648328835375  
7 105 translational elongation  
GO:0006614 3.76966412411771e-10 56.8571428571429 0.181648328835375  
7 105 SRP-dependent cotranslational protein targeting to membrane  
GO:0006613 4.03178584212367e-10 56.2789001122334 0.183378312919521  
7 106 cotranslational protein targeting to membrane  
GO:0045047 4.03178584212367e-10 56.2789001122334 0.183378312919521  
7 106 protein targeting to ER  
GO:0072599 4.03178584212367e-10 56.2789001122334 0.183378312919521  
7 106 establishment of protein localization to endoplasmic reticulum  
GO:0070972 8.60841328508279e-10 50.1526526526527 0.204138121929278  
7 118 protein localization to endoplasmic reticulum  
GO:0000184 9.13641681991106e-10 49.7013888888889 0.205868106013425  
7 119 nuclear-transcribed mRNA catabolic process, nonsense-mediated decay  
GO:0072594 1.21023242562198e-09 34.1656662665066 0.352916753165871  
8 204 establishment of protein localization to organelle  
GO:0019080 4.85655971717182e-09 38.5702160493827 0.26122759670611

STable4\_20PerPair

|                                                                |     |                                                  |                  |                   |                   |   |
|----------------------------------------------------------------|-----|--------------------------------------------------|------------------|-------------------|-------------------|---|
| 7                                                              | 151 | viral genome expression                          |                  |                   |                   |   |
| GO:0019083                                                     |     | 4.85655971717182e-09                             | 38.5702160493827 |                   | 0.26122759670611  |   |
| 7                                                              | 151 | viral transcription                              |                  |                   |                   |   |
| GO:0006612                                                     |     | 5.32340134246467e-09                             | 38.0365296803653 |                   | 0.264687564874403 |   |
| 7                                                              | 153 | protein targeting to membrane                    |                  |                   |                   |   |
| GO:0043624                                                     |     | 5.32340134246467e-09                             | 38.0365296803653 |                   | 0.264687564874403 |   |
| 7                                                              | 153 | cellular protein complex disassembly             |                  |                   |                   |   |
| GO:0043241                                                     |     | 6.66046984147184e-09                             | 36.7641648270787 |                   | 0.273337485295135 |   |
| 7                                                              | 158 | protein complex disassembly                      |                  |                   |                   |   |
| GO:0000956                                                     |     | 1.0634672804538e-08                              | 34.241426611797  | 0.292367310220746 |                   | 7 |
| 169                                                            |     | nuclear-transcribed mRNA catabolic process       |                  |                   |                   |   |
| GO:0034623                                                     |     | 1.30186743611952e-08                             | 33.2045908183633 |                   | 0.301017230641478 |   |
| 7                                                              | 174 | cellular macromolecular complex disassembly      |                  |                   |                   |   |
| GO:0006402                                                     |     | 1.52391365969805e-08                             | 32.4187784275504 |                   | 0.307937166978064 |   |
| 7                                                              | 178 | mRNA catabolic process                           |                  |                   |                   |   |
| GO:0032984                                                     |     | 1.58419103619109e-08                             | 32.2280361757106 |                   | 0.30966715106221  |   |
| 7                                                              | 179 | macromolecular complex disassembly               |                  |                   |                   |   |
| GO:0006401                                                     |     | 4.03930072703358e-08                             | 27.9450056116723 |                   | 0.354646737250017 |   |
| 7                                                              | 205 | RNA catabolic process                            |                  |                   |                   |   |
| GO:0019058                                                     |     | 9.16197193198717e-08                             | 24.65625         | 0.399626323437824 |                   | 7 |
| 231                                                            |     | viral infectious cycle                           |                  |                   |                   |   |
| GO:0022415                                                     |     | 2.05171463523108e-07                             | 21.7854633289416 |                   | 0.449795861878071 |   |
| 7                                                              | 260 | viral reproductive process                       |                  |                   |                   |   |
| GO:0071845                                                     |     | 3.73284780332888e-07                             | 19.8642198154834 |                   | 0.491315479897585 |   |
| 7                                                              | 284 | cellular component disassembly at cellular level |                  |                   |                   |   |
| GO:0022411                                                     |     | 4.10292613740075e-07                             | 19.5759193357058 |                   | 0.498235416234171 |   |
| 7                                                              | 288 | cellular component disassembly                   |                  |                   |                   |   |
| GO:0033365                                                     |     | 8.22122464461807e-07                             | 14.1287792536369 |                   | 0.818282471801259 |   |
| 8                                                              | 473 | protein localization to organelle                |                  |                   |                   |   |
| GO:0006605                                                     |     | 8.35341126315392e-07                             | 14.0974501388538 |                   | 0.820012455885406 |   |
| 8                                                              | 474 | protein targeting                                |                  |                   |                   |   |
| GO:0016032                                                     |     | 8.12287569685107e-06                             | 12.2464964964965 |                   | 0.780222821950038 |   |
| 7                                                              | 451 | viral reproduction                               |                  |                   |                   |   |
| Tissue: Muscle_skeletal=>Adipose_Subcutaneous Type: asymmetric |     |                                                  |                  |                   |                   |   |

SourceGene: RP11-10B2.1(ENSG00000230916.1) agan a processed expressed  
pseudogene

STable4\_20PerPair

TargetGeneSet: MTND1P23 MTND2P28 NMNAT1 DFFA UBR4 LDLRAD2  
HSPG2 KPNA7 THRAP3 RPS8 RPS15AP10 CCBL2 RPL5 RP11 ATP5F1  
RPS27 ASH1L MEF2D COPA PRRC2C CEP350 NBAS PPP1CB UBC C1D AAK1  
DCTN1 EIF5B MAP4K4 IL1RL2 RANBP2 UGGT1 MZT2B HAT1 HDLBP CRELD1  
RPL15 MAP4 USP4 RAD54L2 RPL29 TMF1 PCNP RPL24 CNBP PDCD10  
DNAJC19 AFAP1 BOD1L RELL1 CISD2 RPL34 RPS3A NIPBL CTD MRPS36  
ERAP1 AFF4 SKP1 CTB MTND5P11 CTNNA1 PCDHGC5 TRIM41 GNB2L1  
TMEM14C RPL15P3 DEK GPLD1 RPS10 RPL10A ZFAND3 MTRNR2L9 WDR11  
BCKDHB PHACTR2 IGF2R FOXK1 PHF14 YWHAG CACNA2D1 RPS3AP26  
TNPO3 MLL3 DRP2 HOOK3 RPS20 PAG1 RBM12B POLR2K TG TLN1 CLTA  
XPA ATP6V1G1 RPL35 SETX RPL7A SEC16A PRINS FUT11 KIAA0913  
RPS24 RPS3AP5 MRPL43 ARL3 SFR1 EIF6 CD151 RPL27A MTRNR2L8  
CKAP5 C1QTNF4 GANAB PACS1 TMEM126B UBE4A ATP5L DDX6 ERC1  
C12orf57 PHB2 SCAF11 PFDN5 LRP1 APAF1 RPL18AP3 VPS29  
SBN01 GOLGA3 HMGB1 ZC3H13 ESD ITM2B CCNB1IP1 TEP1 DNAL1  
SEL1L DYNC1H1 MYO9A SEC11A MPG SPSB3 NDUFB10 PGPEP1 MGRN1 ABCC1  
RPS15A NFATC3 CDYL2 RPL13 VPS53 RP13 TLCD2 WDR81 RPL26 TOM1L2  
SUPT6H RPL23A TAOK1 TAF15 RPL19 CDK12 NKIRAS2 RPL27 NMT1 RPS7P11 CLTC  
SUMO2 ANKRD12 C18orf32 RPL17 TPGS1 RPS15 NFIC LONP1 HNRNPA1P10  
BRD4 RPL18 NUCB1 RPL13A ZNF587 RPS5 RRBP1 REM1 HM13 KIF3B  
SCAND1 RALGAPB NCOA3 ADNP TSHZ2 RPL12P4 UBE2G2 HMGB1P10 RP3 MPST  
TNRC6B TCF20 VCX3B USP9X GNL3L RPS4X COX7B APOOL RPL39 THOC2 XIAP  
HCFC1

GOBPID Pvalue OddsRatio ExpCount Count Size Term

GO:0006415 1.69E-34 47.85437456 1.057919867 29 91  
translational termination

STable4\_20PerPair

|                                                             |          |            |            |    |     |
|-------------------------------------------------------------|----------|------------|------------|----|-----|
| GO:0006614                                                  | 4.91E-34 | 41.1826087 | 1.22067677 | 30 | 105 |
| SRP-dependent cotranslational protein targeting to membrane |          |            |            |    |     |

|                                               |          |             |             |    |     |
|-----------------------------------------------|----------|-------------|-------------|----|-----|
| GO:0006613                                    | 6.78E-34 | 40.63787185 | 1.232302263 | 30 | 106 |
| cotranslational protein targeting to membrane |          |             |             |    |     |

|                         |          |             |             |    |     |
|-------------------------|----------|-------------|-------------|----|-----|
| GO:0045047              | 6.78E-34 | 40.63787185 | 1.232302263 | 30 | 106 |
| protein targeting to ER |          |             |             |    |     |

STable4\_20PerPair

|                                                                |          |             |             |    |     |
|----------------------------------------------------------------|----------|-------------|-------------|----|-----|
| GO:0072599                                                     | 6.78E-34 | 40.63787185 | 1.232302263 | 30 | 106 |
| establishment of protein localization to endoplasmic reticulum |          |             |             |    |     |

|                          |          |             |            |    |     |
|--------------------------|----------|-------------|------------|----|-----|
| GO:0006414               | 1.98E-32 | 39.00066263 | 1.22067677 | 29 | 105 |
| translational elongation |          |             |            |    |     |

|                                               |          |            |             |    |     |
|-----------------------------------------------|----------|------------|-------------|----|-----|
| GO:0070972                                    | 2.52E-32 | 35.0666996 | 1.371808179 | 30 | 118 |
| protein localization to endoplasmic reticulum |          |            |             |    |     |

STable4\_20PerPair

|                                                                       |          |             |             |    |     |
|-----------------------------------------------------------------------|----------|-------------|-------------|----|-----|
| GO:0000184                                                            | 1.14E-30 | 32.90143885 | 1.383433672 | 29 | 119 |
| "nuclear-transcribed mRNA catabolic process, nonsense-mediated decay" |          |             |             |    |     |

|                               |          |             |             |    |     |
|-------------------------------|----------|-------------|-------------|----|-----|
| GO:0006612                    | 4.58E-30 | 26.26486778 | 1.778700436 | 31 | 153 |
| protein targeting to membrane |          |             |             |    |     |

|                         |          |             |            |    |     |
|-------------------------|----------|-------------|------------|----|-----|
| GO:0019080              | 7.80E-29 | 25.44376572 | 1.75544945 | 30 | 151 |
| viral genome expression |          |             |            |    |     |



STable4\_20PerPair

|                     |          |             |            |    |     |
|---------------------|----------|-------------|------------|----|-----|
| GO:0019083          | 7.80E-29 | 25.44376572 | 1.75544945 | 30 | 151 |
| viral transcription |          |             |            |    |     |

|                          |          |             |             |    |     |
|--------------------------|----------|-------------|-------------|----|-----|
| GO:0006413               | 9.63E-29 | 25.23342837 | 1.767074943 | 30 | 152 |
| translational initiation |          |             |             |    |     |

|                                                    |          |             |             |    |     |
|----------------------------------------------------|----------|-------------|-------------|----|-----|
| GO:0072594                                         | 2.63E-27 | 19.30369357 | 2.371600581 | 32 | 204 |
| establishment of protein localization to organelle |          |             |             |    |     |

STable4\_20PerPair

|                                            |          |             |             |    |     |
|--------------------------------------------|----------|-------------|-------------|----|-----|
| GO:0000956                                 | 2.74E-27 | 22.12073819 | 1.964708325 | 30 | 169 |
| nuclear-transcribed mRNA catabolic process |          |             |             |    |     |

|                                      |          |             |             |    |     |
|--------------------------------------|----------|-------------|-------------|----|-----|
| GO:0043624                           | 2.93E-27 | 23.82287074 | 1.778700436 | 29 | 153 |
| cellular protein complex disassembly |          |             |             |    |     |

|                             |          |            |             |    |     |
|-----------------------------|----------|------------|-------------|----|-----|
| GO:0043241                  | 7.82E-27 | 22.8914171 | 1.836827901 | 29 | 158 |
| protein complex disassembly |          |            |             |    |     |

STable4\_20PerPair

|                   |          |             |             |    |     |      |
|-------------------|----------|-------------|-------------|----|-----|------|
| GO:0006402        | 1.39E-26 | 20.76233843 | 2.069337762 | 30 | 178 | mRNA |
| catabolic process |          |             |             |    |     |      |

|                                             |          |             |            |    |     |  |
|---------------------------------------------|----------|-------------|------------|----|-----|--|
| GO:0034623                                  | 1.44E-25 | 20.34244604 | 2.02283579 | 29 | 174 |  |
| cellular macromolecular complex disassembly |          |             |            |    |     |  |

|                                    |          |             |             |    |     |  |
|------------------------------------|----------|-------------|-------------|----|-----|--|
| GO:0032984                         | 3.36E-25 | 19.65741007 | 2.080963255 | 29 | 179 |  |
| macromolecular complex disassembly |          |             |             |    |     |  |

STable4\_20PerPair

|                            |          |            |             |    |     |
|----------------------------|----------|------------|-------------|----|-----|
| GO:0022415                 | 4.37E-25 | 15.1361723 | 3.022628192 | 33 | 260 |
| viral reproductive process |          |            |             |    |     |

|                   |          |             |             |    |     |     |
|-------------------|----------|-------------|-------------|----|-----|-----|
| GO:0006401        | 1.07E-24 | 17.52546584 | 2.383226074 | 30 | 205 | RNA |
| catabolic process |          |             |             |    |     |     |

|                        |          |             |             |    |     |
|------------------------|----------|-------------|-------------|----|-----|
| GO:0019058             | 2.47E-24 | 15.93332117 | 2.685488894 | 31 | 231 |
| viral infectious cycle |          |             |             |    |     |

STable4\_20PerPair

|                    |          |             |             |    |     |
|--------------------|----------|-------------|-------------|----|-----|
| GO:0016032         | 2.38E-22 | 9.816725647 | 5.243097364 | 38 | 451 |
| viral reproduction |          |             |             |    |     |

|                                                  |          |             |             |    |     |
|--------------------------------------------------|----------|-------------|-------------|----|-----|
| GO:0071845                                       | 1.37E-21 | 12.54810883 | 3.301640025 | 31 | 284 |
| cellular component disassembly at cellular level |          |             |             |    |     |

|            |          |             |             |    |     |
|------------|----------|-------------|-------------|----|-----|
| GO:0022411 | 2.08E-21 | 12.34928569 | 3.348141997 | 31 | 288 |
|------------|----------|-------------|-------------|----|-----|

cellular component disassembly

STable4\_20PerPair

|                                   |          |            |             |    |     |
|-----------------------------------|----------|------------|-------------|----|-----|
| GO:0033365                        | 1.19E-20 | 8.97014847 | 5.498858211 | 37 | 473 |
| protein localization to organelle |          |            |             |    |     |

|                   |          |             |             |    |     |
|-------------------|----------|-------------|-------------|----|-----|
| GO:0006605        | 1.28E-20 | 8.948975492 | 5.510483704 | 37 | 474 |
| protein targeting |          |             |             |    |     |

|            |          |             |             |    |     |
|------------|----------|-------------|-------------|----|-----|
| GO:0022613 | 2.26E-06 | 5.566737675 | 2.615735935 | 13 | 225 |
|------------|----------|-------------|-------------|----|-----|

STable4\_20PerPair

ribonucleoprotein complex biogenesis

GO:0071843 4.39E-06 5.216699971 2.778492838 13 239  
 cellular component biogenesis at cellular level

| Tissue: Muscle_Skeletal=>Adipose_Subcutaneous | Type: cluster                   |
|-----------------------------------------------|---------------------------------|
| SourceGene: RP11-10B2.1(ENSG00000230916.1)    |                                 |
| TargetGeneSet: MTND1P23 MTND2P28              | NMNAT1 DFFA UBR4 LDLRAD2        |
| HSPG2 KPNA7 THRAP3 RPS8 RPS15AP10             | CCBL2 RPL5 RP11 ATP5F1          |
| RPS27 ASH1L MEF2D COPA PRRC2C CEP350          | NBAS PPP1CB UBC C1D AAK1        |
| DCTN1 EIF5B MAP4K4 IL1RL2 RANBP2 UGGT1        | MZT2B HAT1 HDLBP CRELD1         |
| RPL15 MAP4 USP4 RAD54L2 RPL29 TMF1            | PCNP RPL24 CNBP PDCD10          |
| DNAJC19 AFAP1 BOD1L RELL1 CISD2 RPL34         | RPS3A NIPBL CTD MRPS36          |
| ERAP1 AFF4 SKP1 CTB MTND5P11                  | CTNNA1 PCDHGC5 TRIM41 GNB2L1    |
| TMEM14C RPL15P3 DEK GPLD1 RPS10 RPL10A        | ZFAND3 MTRNR2L9 WDR11           |
| BCKDHB PHACTR2 IGF2R FOXK1 PHF14 YWHAG        | CACNA2D1 RPS3AP26               |
| TNPO3 MLL3 DRP2 HOOK3 RPS20 PAG1              | RBM12B POLR2K TG TLN1 CLTA      |
| XPA ATP6V1G1 RPL35 SETX RPL7A                 | SEC16A PRINS FUT11 KIAA0913     |
| RPS24 RPS3AP5 MRPL43 ARL3 SFR1 EIF6           | CD151 RPL27A MTRNR2L8           |
| CKAP5 C1QTNF4 GANAB PACS1 TMEM126B            | UBE4A ATP5L DDX6 ERC1           |
| C12orf57 PHB2 SCAF11 PFDN5 LRP1               | APAF1 RPL18AP3 VPS29            |
| SBNO1 GOLGA3 HMGB1 ZC3H13 ESD ITM2B           | CCNB1IP1 TEP1 DNAL1             |
| SEL1L DYNC1H1 MYO9A SEC11A MPG SPSB3          | NDUFB10 PGPEP1 MGRN1 ABCC1      |
| RPS15A NFATC3 CDYL2 RPL13 VPS53 RP13          | TLCD2 WDR81 RPL26 TOM1L2        |
| SUPT6H RPL23A TAOK1 TAF15 RPL19 CDK12         | NKIRAS2 RPL27 NMT1 RPS7P11 CLTC |
| SUMO2 ANKRD12 C18orf32 RPL17 TPGS1            | RPS15 NFIC LONP1 HNRNPA1P10     |
| BRD4 RPL18 NUCB1 RPL13A ZNF587 RPS5           | RRBP1 REM1 HM13 KIF3B           |

Stable4\_20PerPair

| SCAND1     | RALGAPB | NCOA3                | ADNP             | TSHZ2 | RPL12P4 | UBE2G2                                                              | HMGB1P10 | RP3   | MPST  |                  |
|------------|---------|----------------------|------------------|-------|---------|---------------------------------------------------------------------|----------|-------|-------|------------------|
| TNRC6B     | TCF20   | VCX3B                | USP9X            | GNL3L | RPS4X   | COX7B                                                               | APOOL    | RPL39 | THOC2 | XIAP             |
| HCFC1      |         |                      |                  |       |         |                                                                     |          |       |       |                  |
| GOBPID     | Pvalue  | OddsRatio            | ExpCount         | Count | Size    | Term                                                                |          |       |       |                  |
| GO:0006415 | 29      | 1.69315822596365e-34 | 47.8543745648642 | 47    | 48642   | translational termination                                           |          |       |       | 1.05791986713722 |
| GO:0006614 | 30      | 4.90507034226677e-34 | 41.1826086956522 | 41    | 56522   | SRP-dependent cotranslational protein targeting to membrane         |          |       |       | 1.22067676977372 |
| GO:0006613 | 30      | 6.77765453932191e-34 | 40.6378718535469 | 40    | 5469    | cotranslational protein targeting to membrane                       |          |       |       | 1.23230226281918 |
| GO:0045047 | 30      | 6.77765453932191e-34 | 40.6378718535469 | 40    | 5469    | protein targeting to ER                                             |          |       |       | 1.23230226281918 |
| GO:0072599 | 30      | 6.77765453932191e-34 | 40.6378718535469 | 40    | 5469    | establishment of protein localization to endoplasmic reticulum      |          |       |       | 1.23230226281918 |
| GO:0006414 | 29      | 1.98171925672855e-32 | 39.0006626277925 | 39    | 7925    | translational elongation                                            |          |       |       | 1.22067676977372 |
| GO:0070972 | 30      | 2.51687126500944e-32 | 35.0666996047431 | 35    | 47431   | protein localization to endoplasmic reticulum                       |          |       |       | 1.37180817936475 |
| GO:0000184 | 29      | 1.13652656807989e-30 | 32.9014388489209 | 32    | 209     | nuclear-transcribed mRNA catabolic process, nonsense-mediated decay |          |       |       | 1.38343367241021 |
| GO:0006612 | 31      | 4.57834943264373e-30 | 26.2648677755175 | 26    | 175     | protein targeting to membrane                                       |          |       |       | 1.77870043595599 |
| GO:0019080 | 30      | 7.79920054782776e-29 | 25.4437657204456 | 25    | 4456    | viral genome expression                                             |          |       |       | 1.75544944986506 |
| GO:0019083 | 30      | 7.79920054782776e-29 | 25.4437657204456 | 25    | 4456    | viral transcription                                                 |          |       |       | 1.75544944986506 |
| GO:0006413 | 30      | 9.62642535139002e-29 | 25.2334283677833 | 25    | 7833    | translational initiation                                            |          |       |       | 1.76707494291053 |
| GO:0072594 | 32      | 2.63344945567504e-27 | 19.3036935704514 | 19    | 4514    | establishment of protein localization to organelle                  |          |       |       | 2.37160058127465 |
| GO:0000956 | 30      | 2.74432847515856e-27 | 22.1207381920551 | 22    | 20551   | nuclear-transcribed mRNA catabolic process                          |          |       |       | 1.96470832468341 |
| GO:0043624 | 29      | 2.92947177317936e-27 | 23.8228707356695 | 23    | 6695    | cellular protein complex disassembly                                |          |       |       | 1.77870043595599 |
| GO:0043241 | 158     | 7.81569614070746e-27 | 22.891417098879  | 22    | 8879    | protein complex disassembly                                         |          |       |       | 1.83682790118331 |
| GO:0006402 | 30      | 1.38563776211798e-26 | 20.7623384253819 | 20    | 3819    | mRNA catabolic process                                              |          |       |       | 2.06933776209259 |
| GO:0034623 | 29      | 1.44028660172029e-25 | 20.3424460431655 | 20    | 1655    | cellular macromolecular complex disassembly                         |          |       |       | 2.02283578991073 |
| GO:0032984 | 29      | 3.3615600053829e-25  | 19.6574100719424 | 19    | 19424   | macromolecular complex disassembly                                  |          |       |       | 2.08096325513805 |
| GO:0022415 | 33      | 4.36523592449143e-25 | 15.1361722956437 | 15    | 6437    | viral reproductive process                                          |          |       |       | 3.02262819182064 |
| GO:0006401 | 30      | 1.06582774776324e-24 | 17.5254658385093 | 17    | 5093    | RNA catabolic process                                               |          |       |       | 2.38322607432012 |
| GO:0019058 | 31      | 2.47279703702292e-24 | 15.9333211678832 | 15    | 8832    | viral infectious cycle                                              |          |       |       | 2.68548889350218 |
| GO:0016032 | 38      | 2.38073510689295e-22 | 9.81672564723412 | 9     | 3412    | viral reproduction                                                  |          |       |       | 5.24309736350426 |
| GO:0071845 | 31      | 1.36745321225318e-21 | 12.5481088254811 | 12    | 54811   | cellular component disassembly at cellular level                    |          |       |       | 3.30164002491177 |
| GO:0022411 | 31      | 2.08232852202989e-21 | 12.3492856939987 | 12    | 9987    | cellular component disassembly                                      |          |       |       | 3.34814199709363 |
| GO:0033365 | 473     | 1.19041863769823e-20 | 8.9701484697808  | 8     | 7808    | protein localization to organelle                                   |          |       |       | 5.49885821050446 |
| GO:0006605 | 37      | 1.27947337289121e-20 | 8.94897549216553 | 8     | 16553   | protein targeting                                                   |          |       |       | 5.51048370354993 |
| GO:0022613 | 225     | 2.25613810346652e-06 | 5.56673767498478 | 5     | 478     | ribonucleoprotein complex biogenesis                                |          |       |       | 2.6157359352294  |
| GO:0071843 | 13      | 4.3887913331541e-06  | 5.21669997145304 | 5     | 304     | cellular component biogenesis at cellular level                     |          |       |       | 2.77849283786589 |

Tissue: Muscle\_skeletal=>Adipose\_Subcutaneous Type: asymmetric



Stable4\_20PerPair

| SourceGene:    | RP11-809N8.5(ENSG00000256148.1)                                     |                                                                |                   |          |          |          |          |          |         |      |  |  |  |
|----------------|---------------------------------------------------------------------|----------------------------------------------------------------|-------------------|----------|----------|----------|----------|----------|---------|------|--|--|--|
| TargetGeneSet: | MTND1P23                                                            | MTND2P28                                                       | DFFA              | HSPG2    | WASF2    | THRAP3   | MFI2     |          |         |      |  |  |  |
| SZT2           | RPS8                                                                | RPL5                                                           | RP11              | ATP5F1   | RPS27    | ASH1L    | PRRC2C   | CEP350   | CICP13  |      |  |  |  |
| CDC42BPA       |                                                                     | ADAM18                                                         | NBAS              | ASXL2    | AAK1     | DCTN1    | EIF5B    | RANBP2   | UGGT1   |      |  |  |  |
| MZT2B          | ANKRD44                                                             | FAM126B                                                        | NBEAL1            | COL4A4   | NR2C2    | RPL15    | MAP4     | USP4     | RAD54L2 |      |  |  |  |
| RPL29          | PCNP                                                                | PHC3                                                           | DNAJC19           | HTT      | BOD1L    | RELL1    | DANCR    | CISD2    | RPL34   |      |  |  |  |
| RPS3A          | NIPBL                                                               | CTD                                                            | ERAP1             | MAN2A1   | AFF4     | CTB      | MTND5P11 |          | RPS14   |      |  |  |  |
| TRIM41         | RPL15P3                                                             | DDX39B                                                         | ZFAND3            | MTRNR2L9 |          | WDR11    | PHACTR2  | IGF2R    | FOXK1   |      |  |  |  |
| HNRNPA1P8      |                                                                     | RPS3AP26                                                       |                   | TNPO3    | MLL3     | DRP2     | HOOK3    | RPS20    | ARFGEF1 | PAG1 |  |  |  |
| RBM12B         | SETX                                                                | RPL7A                                                          | SEC16A            | PRINS    | FUT11    | KIAA0913 |          | GBF1     | CD151   |      |  |  |  |
| RPL27A         | MTRNR2L8                                                            |                                                                | CKAP5             | C1QTNF4  | DDB1     | PPP6R3   | UBE4A    | ATP5L    | DDX6    |      |  |  |  |
| KDM5A          | ERC1                                                                | C12orf57                                                       |                   | RECQL    | SCAF11   | MLL4     | PFDN5    | TMBIM4   | SBNO1   |      |  |  |  |
| GOLGA3         | ZC3H13                                                              | COL4A2                                                         | COL4A2-AS1        |          | CCNB1IP1 |          | TEP1     | C14orf21 |         |      |  |  |  |
| STRN3          | NIN                                                                 | YLPM1                                                          | SEL1L             | CCNK     | CDC42BPB |          | BAHD1    | MYO9A    | SEC11A  | NME3 |  |  |  |
| NDUFB10        | TSC2                                                                | RPS15A                                                         | CDYL2             | RPL13    | GAS8     | VPS53    | WDR81    | ZZEF1    | RPL26   |      |  |  |  |
| TOM1L2         | SUPT6H                                                              | RPL23A                                                         | TAOK1             | CDK12    | NKIRAS2  | RPS7P11  | CLTC     | SUMO2    | FN3KRP  |      |  |  |  |
| ROCK1P1        | ANKRD12                                                             | HNRNPA1P10                                                     |                   | BRD4     | RPSAP58  | RPL18    | RPL13A   | ZNF587   | REM1    |      |  |  |  |
| KIF3B          | RALGAPB                                                             | NCOA3                                                          | RPL12P4           | UBE2G2   | HMGB1P10 |          | MPST     | EIF3L    | USP9X   |      |  |  |  |
| KDM5C          | HUWE1                                                               | GNL3L                                                          | RPS4X             | COX7B    | RPL39    | HCFC1    |          |          |         |      |  |  |  |
| GOBPID         | Pvalue                                                              | OddsRatio                                                      | ExpCount          | Count    | Size     | Term     |          |          |         |      |  |  |  |
| GO:0006614     | 4.92329849393982e-22                                                | 33.185789167152                                                | 0.879177911563214 | 20       |          |          |          |          |         |      |  |  |  |
| 105            | SRP-dependent cotranslational protein targeting to membrane         |                                                                |                   |          |          |          |          |          |         |      |  |  |  |
| GO:0006613     | 6.02762935647183e-22                                                | 32.7976053419295                                               | 0.887551034530482 |          |          |          |          |          |         |      |  |  |  |
| 20             | 106                                                                 | cotranslational protein targeting to membrane                  |                   |          |          |          |          |          |         |      |  |  |  |
| GO:0045047     | 6.02762935647183e-22                                                | 32.7976053419295                                               | 0.887551034530482 |          |          |          |          |          |         |      |  |  |  |
| 20             | 106                                                                 | protein targeting to ER                                        |                   |          |          |          |          |          |         |      |  |  |  |
| GO:0072599     | 6.02762935647183e-22                                                | 32.7976053419295                                               | 0.887551034530482 |          |          |          |          |          |         |      |  |  |  |
| 20             | 106                                                                 | establishment of protein localization to endoplasmic reticulum |                   |          |          |          |          |          |         |      |  |  |  |
| GO:0006415     | 8.71361094645675e-22                                                | 36.8875272331155                                               | 0.761954190021452 |          |          |          |          |          |         |      |  |  |  |
| 19             | 91                                                                  | translational termination                                      |                   |          |          |          |          |          |         |      |  |  |  |
| GO:0070972     | 5.84034084046466e-21                                                | 28.757324712063                                                | 0.988028510137707 | 20       |          |          |          |          |         |      |  |  |  |
| 118            | protein localization to endoplasmic reticulum                       |                                                                |                   |          |          |          |          |          |         |      |  |  |  |
| GO:0006414     | 1.60244186277121e-20                                                | 30.8522571819425                                               | 0.879177911563214 |          |          |          |          |          |         |      |  |  |  |
| 19             | 105                                                                 | translational elongation                                       |                   |          |          |          |          |          |         |      |  |  |  |
| GO:0006413     | 4.88828125182033e-20                                                | 22.7617557251908                                               | 1.27271469102484  |          |          |          |          |          |         |      |  |  |  |
| 21             | 152                                                                 | translational initiation                                       |                   |          |          |          |          |          |         |      |  |  |  |
| GO:0000184     | 1.95056941221635e-19                                                | 26.506862745098                                                | 0.996401633104975 | 19       |          |          |          |          |         |      |  |  |  |
| 119            | nuclear-transcribed mRNA catabolic process, nonsense-mediated decay |                                                                |                   |          |          |          |          |          |         |      |  |  |  |
| GO:0006612     | 1.25287033764925e-18                                                | 21.1374972083675                                               | 1.28108781399211  |          |          |          |          |          |         |      |  |  |  |
| 20             | 153                                                                 | protein targeting to membrane                                  |                   |          |          |          |          |          |         |      |  |  |  |
| GO:0000956     | 9.3458581385066e-18                                                 | 18.8464349790684                                               | 1.41505778146841  |          |          |          |          |          |         |      |  |  |  |
| 20             | 169                                                                 | nuclear-transcribed mRNA catabolic process                     |                   |          |          |          |          |          |         |      |  |  |  |
| GO:0019080     | 2.02829989637344e-17                                                | 20.0357991681521                                               | 1.26434156805757  |          |          |          |          |          |         |      |  |  |  |
| 19             | 151                                                                 | viral genome expression                                        |                   |          |          |          |          |          |         |      |  |  |  |
| GO:0019083     | 2.02829989637344e-17                                                | 20.0357991681521                                               | 1.26434156805757  |          |          |          |          |          |         |      |  |  |  |
| 19             | 151                                                                 | viral transcription                                            |                   |          |          |          |          |          |         |      |  |  |  |
| GO:0072594     | 2.44165470363414e-17                                                | 16.234262295082                                                | 1.70811708532281  | 21       |          |          |          |          |         |      |  |  |  |
| 204            | establishment of protein localization to organelle                  |                                                                |                   |          |          |          |          |          |         |      |  |  |  |
| GO:0043624     | 2.61108758813079e-17                                                | 19.7339771729587                                               | 1.28108781399211  |          |          |          |          |          |         |      |  |  |  |
| 19             | 153                                                                 | cellular protein complex disassembly                           |                   |          |          |          |          |          |         |      |  |  |  |
| GO:0006402     | 2.64029367412081e-17                                                | 17.7616242636922                                               | 1.49041588817383  |          |          |          |          |          |         |      |  |  |  |
| 20             | 178                                                                 | mRNA catabolic process                                         |                   |          |          |          |          |          |         |      |  |  |  |
| GO:0043241     | 4.83217148446209e-17                                                | 19.017421357032                                                | 1.32295342882845  | 19       |          |          |          |          |         |      |  |  |  |
| 158            | protein complex disassembly                                         |                                                                |                   |          |          |          |          |          |         |      |  |  |  |
| GO:0034623     | 3.01775072241743e-16                                                | 17.0351043643264                                               | 1.45692339630475  |          |          |          |          |          |         |      |  |  |  |
| 19             | 174                                                                 | cellular macromolecular complex disassembly                    |                   |          |          |          |          |          |         |      |  |  |  |
| GO:0006401     | 4.3132110232671e-16                                                 | 15.1404870216751                                               | 1.71649020829008  |          |          |          |          |          |         |      |  |  |  |
| 20             | 205                                                                 | RNA catabolic process                                          |                   |          |          |          |          |          |         |      |  |  |  |
| GO:0032984     | 5.14684970725644e-16                                                | 16.4969362745098                                               | 1.4987890111411   | 19       |          |          |          |          |         |      |  |  |  |
| 179            | macromolecular complex disassembly                                  |                                                                |                   |          |          |          |          |          |         |      |  |  |  |
| GO:0033365     | 1.52662954937172e-15                                                | 8.94160862513119                                               | 3.9604871635181   | 27       |          |          |          |          |         |      |  |  |  |
| 473            | protein localization to organelle                                   |                                                                |                   |          |          |          |          |          |         |      |  |  |  |
| GO:0022415     | 3.46075199164941e-15                                                | 12.3812133891213                                               | 2.17701197148986  |          |          |          |          |          |         |      |  |  |  |

STable4\_20PerPair

|                                               |          |                                                                     |                  |                   |          |          |          |                  |         |
|-----------------------------------------------|----------|---------------------------------------------------------------------|------------------|-------------------|----------|----------|----------|------------------|---------|
| 21                                            | 260      | viral reproductive process                                          |                  |                   |          |          |          |                  |         |
| GO:0006605                                    |          | 1.42515940146057e-14                                                | 8.48054511278196 |                   |          |          |          | 3.96886028648536 |         |
| 26                                            | 474      | protein targeting                                                   |                  |                   |          |          |          |                  |         |
| GO:0019058                                    |          | 5.78076611768289e-14                                                | 12.4048279689234 |                   |          |          |          | 1.93419140543907 |         |
| 19                                            | 231      | viral infectious cycle                                              |                  |                   |          |          |          |                  |         |
| GO:0071845                                    |          | 2.25182775650332e-13                                                | 10.5505550555056 |                   |          |          |          | 2.37796692270431 |         |
| 20                                            | 284      | cellular component disassembly at cellular level                    |                  |                   |          |          |          |                  |         |
| GO:0022411                                    |          | 2.9273467923705e-13                                                 | 10.3901285650953 |                   |          |          |          | 2.41145941457339 |         |
| 20                                            | 288      | cellular component disassembly                                      |                  |                   |          |          |          |                  |         |
| GO:0016032                                    |          | 2.00252277318165e-11                                                | 7.2007252007252  | 3.77627845823818  |          |          |          |                  | 22      |
| 451                                           |          | viral reproduction                                                  |                  |                   |          |          |          |                  |         |
| GO:0022613                                    |          | 1.92112304952327e-05                                                | 5.91451917033312 |                   |          |          |          | 1.88395266763546 |         |
| 10                                            | 225      | ribonucleoprotein complex biogenesis                                |                  |                   |          |          |          |                  |         |
| Tissue: Muscle_skeletal=>Adipose_subcutaneous |          |                                                                     | Type:            | cluster           |          |          |          |                  |         |
| SourceGene:                                   |          | RP11-809N8.5(ENSG00000256148.1)                                     |                  |                   |          |          |          |                  |         |
| TargetGeneSet:                                |          | MTND1P23                                                            | MTND2P28         | DFFA              | HSPG2    | WASF2    | THRAP3   | MF12             |         |
| SZT2                                          | RPS8     | RPL5                                                                | RP11             | ATP5F1            | RPS27    | ASH1L    | PRRC2C   | CEP350           | CICP13  |
| CDC42BPA                                      |          | ADAM18                                                              | NBAS             | ASXL2             | AAK1     | DCTN1    | EIF5B    | RANBP2           | UGGT1   |
| MZT2B                                         | ANKRD44  | FAM126B                                                             | NBEAL1           | COL4A4            | NR2C2    | RPL15    | MAP4     | USP4             | RAD54L2 |
| RPL29                                         | PCNP     | PHC3                                                                | DNAJC19          | HTT               | BOD1L    | RELL1    | DANCR    | CISD2            | RPL34   |
| RPS3A                                         | NIPBL    | CTD                                                                 | ERAP1            | MAN2A1            | AFF4     | CTB      | MTND5P11 |                  | RPS14   |
| TRIM41                                        | RPL15P3  | DDX39B                                                              | ZFAND3           | MTRNR2L9          |          | WDR11    | PHACTR2  | IGF2R            | FOXK1   |
| HNRNPA1P8                                     |          | RPS3AP26                                                            |                  | TNPO3             | MLL3     | DRP2     | HOOK3    | RPS20            | ARFGEF1 |
| RBM12B                                        | SETX     | RPL7A                                                               | SEC16A           | PRINS             | FUT11    | KIAA0913 |          | GBF1             | CD151   |
| RPL27A                                        | MTRNR2L8 |                                                                     | CKAP5            | C1QTNF4           | DDB1     | PPP6R3   | UBE4A    | ATP5L            | DDX6    |
| KDM5A                                         | ERC1     | C12orf57                                                            |                  | RECQL             | SCAF11   | MLL4     | PFDN5    | TMBIM4           | SBNO1   |
| GOLGA3                                        | ZC3H13   | COL4A2                                                              | COL4A2-AS1       |                   | CCNB1IP1 |          | TEP1     | C14orf21         |         |
| STRN3                                         | NIN      | YLPM1                                                               | SEL1L            | CCNK              | CDC42BPB |          | BAHD1    | MYO9A            | SEC11A  |
| NDUFB10                                       | TSC2     | RPS15A                                                              | CDYL2            | RPL13             | GAS8     | VPS53    | WDR81    | ZZEF1            | RPL26   |
| TOM1L2                                        | SUPT6H   | RPL23A                                                              | TAOK1            | CDK12             | NKIRAS2  | RPS7P11  | CLTC     | SUMO2            | FN3KRP  |
| ROCK1P1                                       | ANKRD12  | HNRNPA1P10                                                          |                  | BRD4              | RPSAP58  | RPL18    | RPL13A   | ZNF587           | REM1    |
| KIF3B                                         | RALGAPB  | NCOA3                                                               | RPL12P4          | UBE2G2            | HMGB1P10 |          | MPST     | EIF3L            | USP9X   |
| KDM5C                                         | HUWE1    | GNL3L                                                               | RPS4X            | COX7B             | RPL39    | HCFC1    |          |                  |         |
| GOBPID                                        | Pvalue   | OddsRatio                                                           | ExpCount         | Count             | Size     | Term     |          |                  |         |
| GO:0006614                                    |          | 4.92329849393982e-22                                                | 33.185789167152  | 0.879177911563214 |          |          |          |                  | 20      |
| 105                                           |          | SRP-dependent cotranslational protein targeting to membrane         |                  |                   |          |          |          |                  |         |
| GO:0006613                                    |          | 6.02762935647183e-22                                                | 32.7976053419295 | 0.887551034530482 |          |          |          |                  |         |
| 20                                            | 106      | cotranslational protein targeting to membrane                       |                  |                   |          |          |          |                  |         |
| GO:0045047                                    |          | 6.02762935647183e-22                                                | 32.7976053419295 | 0.887551034530482 |          |          |          |                  |         |
| 20                                            | 106      | protein targeting to ER                                             |                  |                   |          |          |          |                  |         |
| GO:0072599                                    |          | 6.02762935647183e-22                                                | 32.7976053419295 | 0.887551034530482 |          |          |          |                  |         |
| 20                                            | 106      | establishment of protein localization to endoplasmic reticulum      |                  |                   |          |          |          |                  |         |
| GO:0006415                                    |          | 8.71361094645675e-22                                                | 36.8875272331155 | 0.761954190021452 |          |          |          |                  |         |
| 19                                            | 91       | translational termination                                           |                  |                   |          |          |          |                  |         |
| GO:0070972                                    |          | 5.84034084046466e-21                                                | 28.757324712063  | 0.988028510137707 |          |          |          |                  | 20      |
| 118                                           |          | protein localization to endoplasmic reticulum                       |                  |                   |          |          |          |                  |         |
| GO:0006414                                    |          | 1.60244186277121e-20                                                | 30.8522571819425 | 0.879177911563214 |          |          |          |                  |         |
| 19                                            | 105      | translational elongation                                            |                  |                   |          |          |          |                  |         |
| GO:0006413                                    |          | 4.88828125182033e-20                                                | 22.7617557251908 | 1.27271469102484  |          |          |          |                  |         |
| 21                                            | 152      | translational initiation                                            |                  |                   |          |          |          |                  |         |
| GO:0000184                                    |          | 1.95056941221635e-19                                                | 26.506862745098  | 0.996401633104975 |          |          |          |                  | 19      |
| 119                                           |          | nuclear-transcribed mRNA catabolic process, nonsense-mediated decay |                  |                   |          |          |          |                  |         |
| GO:0006612                                    |          | 1.25287033764925e-18                                                | 21.1374972083675 | 1.28108781399211  |          |          |          |                  |         |
| 20                                            | 153      | protein targeting to membrane                                       |                  |                   |          |          |          |                  |         |
| GO:0000956                                    |          | 9.3458581385066e-18                                                 | 18.8464349790684 | 1.41505778146841  |          |          |          |                  |         |
| 20                                            | 169      | nuclear-transcribed mRNA catabolic process                          |                  |                   |          |          |          |                  |         |
| GO:0019080                                    |          | 2.02829989637344e-17                                                | 20.0357991681521 | 1.26434156805757  |          |          |          |                  |         |
| 19                                            | 151      | viral genome expression                                             |                  |                   |          |          |          |                  |         |
| GO:0019083                                    |          | 2.02829989637344e-17                                                | 20.0357991681521 | 1.26434156805757  |          |          |          |                  |         |
| 19                                            | 151      | viral transcription                                                 |                  |                   |          |          |          |                  |         |
| GO:0072594                                    |          | 2.44165470363414e-17                                                | 16.234262295082  | 1.70811708532281  |          |          |          |                  | 21      |
| 204                                           |          | establishment of protein localization to organelle                  |                  |                   |          |          |          |                  |         |
| GO:0043624                                    |          | 2.61108758813079e-17                                                | 19.7339771729587 | 1.28108781399211  |          |          |          |                  |         |

Stable4\_20PerPair

|                |                                    |                                                                     |                  |                   |       |                   |      |                  |       |
|----------------|------------------------------------|---------------------------------------------------------------------|------------------|-------------------|-------|-------------------|------|------------------|-------|
| 19             | 153                                | cellular protein complex disassembly                                |                  |                   |       |                   |      |                  |       |
| GO:0006402     |                                    | 2.64029367412081e-17                                                | 17.7616242636922 |                   |       |                   |      | 1.49041588817383 |       |
| 20             | 178                                | mRNA catabolic process                                              |                  |                   |       |                   |      |                  |       |
| GO:0043241     |                                    | 4.83217148446209e-17                                                | 19.017421357032  | 1.32295342882845  |       |                   |      |                  | 19    |
| 158            | protein                            | complex disassembly                                                 |                  |                   |       |                   |      |                  |       |
| GO:0034623     |                                    | 3.01775072241743e-16                                                | 17.0351043643264 |                   |       |                   |      | 1.45692339630475 |       |
| 19             | 174                                | cellular macromolecular complex disassembly                         |                  |                   |       |                   |      |                  |       |
| GO:0006401     |                                    | 4.3132110232671e-16                                                 | 15.1404870216751 |                   |       |                   |      | 1.71649020829008 |       |
| 20             | 205                                | RNA catabolic process                                               |                  |                   |       |                   |      |                  |       |
| GO:0032984     |                                    | 5.14684970725644e-16                                                | 16.4969362745098 |                   |       |                   |      | 1.4987890111411  | 19    |
| 179            | macromole                          | cular complex disassembly                                           |                  |                   |       |                   |      |                  |       |
| GO:0033365     |                                    | 1.52662954937172e-15                                                | 8.94160862513119 |                   |       |                   |      | 3.9604871635181  | 27    |
| 473            | protein                            | localization to organelle                                           |                  |                   |       |                   |      |                  |       |
| GO:0022415     |                                    | 3.46075199164941e-15                                                | 12.3812133891213 |                   |       |                   |      | 2.17701197148986 |       |
| 21             | 260                                | viral reproductive process                                          |                  |                   |       |                   |      |                  |       |
| GO:0006605     |                                    | 1.42515940146057e-14                                                | 8.48054511278196 |                   |       |                   |      | 3.96886028648536 |       |
| 26             | 474                                | protein targeting                                                   |                  |                   |       |                   |      |                  |       |
| GO:0019058     |                                    | 5.78076611768289e-14                                                | 12.4048279689234 |                   |       |                   |      | 1.93419140543907 |       |
| 19             | 231                                | viral infectious cycle                                              |                  |                   |       |                   |      |                  |       |
| GO:0071845     |                                    | 2.25182775650332e-13                                                | 10.5505550555056 |                   |       |                   |      | 2.37796692270431 |       |
| 20             | 284                                | cellular component disassembly at cellular level                    |                  |                   |       |                   |      |                  |       |
| GO:0022411     |                                    | 2.9273467923705e-13                                                 | 10.3901285650953 |                   |       |                   |      | 2.41145941457339 |       |
| 20             | 288                                | cellular component disassembly                                      |                  |                   |       |                   |      |                  |       |
| GO:0016032     |                                    | 2.00252277318165e-11                                                | 7.2007252007252  | 3.77627845823818  |       |                   |      |                  | 22    |
| 451            | viral                              | reproduction                                                        |                  |                   |       |                   |      |                  |       |
| GO:0022613     |                                    | 1.92112304952327e-05                                                | 5.91451917033312 |                   |       |                   |      | 1.88395266763546 |       |
| 10             | 225                                | ribonucleoprotein complex biogenesis                                |                  |                   |       |                   |      |                  |       |
| Tissue:        | Adipose_Subcutaneous=>Nerve_Tibial | Type:                                                               | asymmetric       |                   |       |                   |      |                  |       |
| SourceGene:    | ALDH1B1(ENSG00000137124.5)         |                                                                     |                  |                   |       |                   |      |                  |       |
| TargetGeneSet: | RPL11                              | RPS27                                                               | PKLR             | GAS5              | RPL14 | CADM2-AS1         | RP11 |                  |       |
| SCRG1          | RPS10                              | RPS20                                                               | RPL30            | RPL12             | RPL7A | PCBD1             | RPL6 | RPL7AP6          | SNRPN |
| GOLGA6L4       |                                    | RPL26                                                               | ACACA            | RPL19             | NETO1 | HPN               | NKG7 | RPL28            | LSS   |
| EIF3L          | GPC4                               | RPL10                                                               |                  |                   |       |                   |      |                  |       |
| GOBPID         | Pvalue                             | OddsRatio                                                           | ExpCount         | Count             | Size  | Term              |      |                  |       |
| GO:0006415     |                                    | 2.36525599733211e-23                                                | 217.409090909091 |                   |       | 0.151131409591032 |      |                  |       |
| 13             | 91                                 | translational termination                                           |                  |                   |       |                   |      |                  |       |
| GO:0006414     |                                    | 1.70532207841082e-22                                                | 184.145256916996 |                   |       | 0.17438239568196  |      |                  |       |
| 13             | 105                                | translational elongation                                            |                  |                   |       |                   |      |                  |       |
| GO:0006614     |                                    | 1.70532207841082e-22                                                | 184.145256916996 |                   |       | 0.17438239568196  |      |                  |       |
| 13             | 105                                | SRP-dependent cotranslational protein targeting to membrane         |                  |                   |       |                   |      |                  |       |
| GO:0019080     |                                    | 1.79407676843101e-22                                                | 146.029197080292 |                   |       | 0.250778492837866 |      |                  |       |
| 14             | 151                                | viral genome expression                                             |                  |                   |       |                   |      |                  |       |
| GO:0019083     |                                    | 1.79407676843101e-22                                                | 146.029197080292 |                   |       | 0.250778492837866 |      |                  |       |
| 14             | 151                                | viral transcription                                                 |                  |                   |       |                   |      |                  |       |
| GO:0006613     |                                    | 1.94231758806374e-22                                                | 182.152492668622 |                   |       | 0.17604318040274  |      |                  |       |
| 13             | 106                                | cotranslational protein targeting to membrane                       |                  |                   |       |                   |      |                  |       |
| GO:0045047     |                                    | 1.94231758806374e-22                                                | 182.152492668622 |                   |       | 0.17604318040274  |      |                  |       |
| 13             | 106                                | protein targeting to ER                                             |                  |                   |       |                   |      |                  |       |
| GO:0072599     |                                    | 1.94231758806374e-22                                                | 182.152492668622 |                   |       | 0.17604318040274  |      |                  |       |
| 13             | 106                                | establishment of protein localization to endoplasmic reticulum      |                  |                   |       |                   |      |                  |       |
| GO:0006413     |                                    | 1.97479609705954e-22                                                | 144.960869565217 |                   |       | 0.252439277558646 |      |                  |       |
| 14             | 152                                | translational initiation                                            |                  |                   |       |                   |      |                  |       |
| GO:0070972     |                                    | 8.41874403674507e-22                                                | 161.2            | 0.195972597052107 |       | 13                |      |                  | 118   |
| protein        | localization                       | to endoplasmic reticulum                                            |                  |                   |       |                   |      |                  |       |
| GO:0000184     |                                    | 9.44450207397793e-22                                                | 159.668096054889 |                   |       | 0.197633381772888 |      |                  |       |
| 13             | 119                                | nuclear-transcribed mRNA catabolic process, nonsense-mediated decay |                  |                   |       |                   |      |                  |       |
| GO:0006612     |                                    | 2.82503658286128e-20                                                | 120.604545454545 |                   |       | 0.254100062279427 |      |                  |       |
| 13             | 153                                | protein targeting to membrane                                       |                  |                   |       |                   |      |                  |       |
| GO:0043624     |                                    | 2.82503658286128e-20                                                | 120.604545454545 |                   |       | 0.254100062279427 |      |                  |       |
| 13             | 153                                | cellular protein complex disassembly                                |                  |                   |       |                   |      |                  |       |
| GO:0043241     |                                    | 4.34944305560692e-20                                                | 116.405015673981 |                   |       | 0.26240398588333  |      |                  |       |
| 13             | 158                                | protein complex disassembly                                         |                  |                   |       |                   |      |                  |       |
| GO:0019058     |                                    | 8.15435952605171e-20                                                | 91.6774193548387 |                   |       | 0.383641270500311 |      |                  |       |

STable4\_20PerPair

|                                                               |     |                                                                     |                  |                   |  |  |  |                    |    |
|---------------------------------------------------------------|-----|---------------------------------------------------------------------|------------------|-------------------|--|--|--|--------------------|----|
| 14                                                            | 231 | viral infectious cycle                                              |                  |                   |  |  |  |                    |    |
| GO:0000956                                                    |     | 1.07082145951018e-19                                                | 108.113636363636 |                   |  |  |  | 0.280672617811916  |    |
| 13                                                            | 169 | nuclear-transcribed mRNA catabolic process                          |                  |                   |  |  |  |                    |    |
| GO:0034623                                                    |     | 1.58064540448204e-19                                                | 104.719367588933 |                   |  |  |  | 0.288976541415819  |    |
| 13                                                            | 174 | cellular macromolecular complex disassembly                         |                  |                   |  |  |  |                    |    |
| GO:0006402                                                    |     | 2.14045600967934e-19                                                | 102.152066115702 |                   |  |  |  | 0.295619680298941  |    |
| 13                                                            | 178 | mRNA catabolic process                                              |                  |                   |  |  |  |                    |    |
| GO:0032984                                                    |     | 2.30643262079744e-19                                                | 101.529572836802 |                   |  |  |  | 0.297280465019722  |    |
| 13                                                            | 179 | macromolecular complex disassembly                                  |                  |                   |  |  |  |                    |    |
| GO:0022415                                                    |     | 4.38531556145992e-19                                                | 80.7048780487805 |                   |  |  |  | 0.431804027402948  |    |
| 14                                                            | 260 | viral reproductive process                                          |                  |                   |  |  |  |                    |    |
| GO:0072594                                                    |     | 1.3107907802754e-18                                                 | 88.0856734888148 |                   |  |  |  | 0.338800083039236  |    |
| 13                                                            | 204 | establishment of protein localization to organelle                  |                  |                   |  |  |  |                    |    |
| GO:0006401                                                    |     | 1.39854045986023e-18                                                | 87.6207386363636 |                   |  |  |  | 0.340460867760017  |    |
| 13                                                            | 205 | RNA catabolic process                                               |                  |                   |  |  |  |                    |    |
| GO:0071845                                                    |     | 1.53203446987607e-18                                                | 73.4066666666667 |                   |  |  |  | 0.471662860701682  |    |
| 14                                                            | 284 | cellular component disassembly at cellular level                    |                  |                   |  |  |  |                    |    |
| GO:0022411                                                    |     | 1.86706634090778e-18                                                | 72.314598540146  | 0.478305999584804 |  |  |  |                    | 14 |
| 288                                                           |     | cellular component disassembly                                      |                  |                   |  |  |  |                    |    |
| GO:0016032                                                    |     | 1.00514907255067e-15                                                | 44.8192219679634 |                   |  |  |  | 0.749013909072037  |    |
| 14                                                            | 451 | viral reproduction                                                  |                  |                   |  |  |  |                    |    |
| GO:0033365                                                    |     | 7.55931581953024e-14                                                | 35.8835968379447 |                   |  |  |  | 0.785551172929209  |    |
| 13                                                            | 473 | protein localization to organelle                                   |                  |                   |  |  |  |                    |    |
| GO:0006605                                                    |     | 7.76682818723057e-14                                                | 35.8031946361664 |                   |  |  |  | 0.78721195764999   |    |
| 13                                                            | 474 | protein targeting                                                   |                  |                   |  |  |  |                    |    |
| GO:0042273                                                    |     | 8.76835229964862e-07                                                | 228.857142857143 |                   |  |  |  | 0.0199294166493668 |    |
| 3                                                             | 12  | ribosomal large subunit biogenesis                                  |                  |                   |  |  |  |                    |    |
| Tissue: Adipose_Subcutaneous=>Nerve_Tibial                    |     | Type: asymmetric                                                    |                  |                   |  |  |  |                    |    |
| SourceGene: CNN1(ENSG00000130176.2)                           |     |                                                                     |                  |                   |  |  |  |                    |    |
| TargetGeneSet: RPL11 RP11 RPS27 BCL11A RPL14 EPB41L4A FAM135A |     |                                                                     |                  |                   |  |  |  |                    |    |
| MRPS12 RPS20 OTUD6B RPL30 TATDN1 KLC2 VWA5A CTD ALDH3A1 ACACA |     |                                                                     |                  |                   |  |  |  |                    |    |
| RPL17 RPL19 RSL24D1P11 UBA52 RPL28 PCBP3                      |     |                                                                     |                  |                   |  |  |  |                    |    |
| GOBPID Pvalue OddsRatio ExpCount Count Size Term              |     |                                                                     |                  |                   |  |  |  |                    |    |
| GO:0006415                                                    |     | 2.42067264909835e-16                                                | 196.90243902439  | 0.107051415126981 |  |  |  |                    | 9  |
| 91                                                            |     | translational termination                                           |                  |                   |  |  |  |                    |    |
| GO:0006414                                                    |     | 9.216208669879e-16                                                  | 168.0234375      | 0.123520863608055 |  |  |  |                    | 9  |
| 105                                                           |     | translational elongation                                            |                  |                   |  |  |  |                    |    |
| GO:0006614                                                    |     | 9.216208669879e-16                                                  | 168.0234375      | 0.123520863608055 |  |  |  |                    | 9  |
| 105                                                           |     | SRP-dependent cotranslational protein targeting to membrane         |                  |                   |  |  |  |                    |    |
| GO:0006613                                                    |     | 1.00662717500152e-15                                                | 166.279639175258 | 0.124697252785274 |  |  |  |                    |    |
| 9                                                             | 106 | cotranslational protein targeting to membrane                       |                  |                   |  |  |  |                    |    |
| GO:0045047                                                    |     | 1.00662717500152e-15                                                | 166.279639175258 | 0.124697252785274 |  |  |  |                    |    |
| 9                                                             | 106 | protein targeting to ER                                             |                  |                   |  |  |  |                    |    |
| GO:0072599                                                    |     | 1.00662717500152e-15                                                | 166.279639175258 | 0.124697252785274 |  |  |  |                    |    |
| 9                                                             | 106 | establishment of protein localization to endoplasmic reticulum      |                  |                   |  |  |  |                    |    |
| GO:0070972                                                    |     | 2.72424673952409e-15                                                | 147.849770642202 | 0.138813922911909 |  |  |  |                    |    |
| 9                                                             | 118 | protein localization to endoplasmic reticulum                       |                  |                   |  |  |  |                    |    |
| GO:0000184                                                    |     | 2.94566104471822e-15                                                | 146.495454545455 | 0.139990312089129 |  |  |  |                    |    |
| 9                                                             | 119 | nuclear-transcribed mRNA catabolic process, nonsense-mediated decay |                  |                   |  |  |  |                    |    |
| GO:0019080                                                    |     | 2.64338118996e-14                                                   | 113.228873239437 | 0.177634765760155 |  |  |  |                    |    |
| 9                                                             | 151 | viral genome expression                                             |                  |                   |  |  |  |                    |    |
| GO:0019083                                                    |     | 2.64338118996e-14                                                   | 113.228873239437 | 0.177634765760155 |  |  |  |                    |    |
| 9                                                             | 151 | viral transcription                                                 |                  |                   |  |  |  |                    |    |
| GO:0006413                                                    |     | 2.80833544815286e-14                                                | 112.429195804196 | 0.178811154937375 |  |  |  |                    |    |
| 9                                                             | 152 | translational initiation                                            |                  |                   |  |  |  |                    |    |
| GO:0006612                                                    |     | 2.98235641610268e-14                                                | 111.640625       | 0.179987544114594 |  |  |  |                    | 9  |
| 153                                                           |     | protein targeting to membrane                                       |                  |                   |  |  |  |                    |    |
| GO:0043624                                                    |     | 2.98235641610268e-14                                                | 111.640625       | 0.179987544114594 |  |  |  |                    | 9  |
| 153                                                           |     | cellular protein complex disassembly                                |                  |                   |  |  |  |                    |    |
| GO:0043241                                                    |     | 4.00419344287656e-14                                                | 107.856543624161 | 0.185869490000692 |  |  |  |                    |    |
| 9                                                             | 158 | protein complex disassembly                                         |                  |                   |  |  |  |                    |    |
| GO:0000956                                                    |     | 7.41056323208651e-14                                                | 100.3640625      | 0.198809770950107 |  |  |  |                    | 9  |
| 169                                                           |     | nuclear-transcribed mRNA catabolic process                          |                  |                   |  |  |  |                    |    |

Stable4\_20PerPair

|                                            |                      |                                                                     |                   |
|--------------------------------------------|----------------------|---------------------------------------------------------------------|-------------------|
| GO:0034623                                 | 9.67098404549803e-14 | 97.2886363636364                                                    | 0.204691716836205 |
| 9                                          | 174                  | cellular macromolecular complex disassembly                         |                   |
| GO:0006402                                 | 1.1899244880822e-13  | 94.9593195266272                                                    | 0.209397273545083 |
| 9                                          | 178                  | mRNA catabolic process                                              |                   |
| GO:0032984                                 | 1.25228968636938e-13 | 94.3941176470588                                                    | 0.210573662722303 |
| 9                                          | 179                  | macromolecular complex disassembly                                  |                   |
| GO:0072594                                 | 4.11396147908514e-13 | 82.1480769230769                                                    | 0.239983392152792 |
| 9                                          | 204                  | establishment of protein localization to organelle                  |                   |
| GO:0006401                                 | 4.3006982319074e-13  | 81.7232142857143                                                    | 0.241159781330012 |
| 9                                          | 205                  | RNA catabolic process                                               |                   |
| GO:0019058                                 | 1.26875360582069e-12 | 72.0202702702703                                                    | 0.271745899937721 |
| 9                                          | 231                  | viral infectious cycle                                              |                   |
| GO:0022415                                 | 3.68969869097354e-12 | 63.5692231075697                                                    | 0.305861186077088 |
| 9                                          | 260                  | viral reproductive process                                          |                   |
| GO:0071845                                 | 8.16598085479159e-12 | 57.9231818181818                                                    | 0.334094526330358 |
| 9                                          | 284                  | cellular component disassembly at cellular level                    |                   |
| GO:0022411                                 | 9.25924200927783e-12 | 57.0766129032258                                                    | 0.338800083039236 |
| 9                                          | 288                  | cellular component disassembly                                      |                   |
| GO:0016032                                 | 5.05270111811315e-10 | 35.6131221719457                                                    | 0.530551518926026 |
| 9                                          | 451                  | viral reproduction                                                  |                   |
| GO:0033365                                 | 7.69883716810493e-10 | 33.8712284482759                                                    | 0.556432080824856 |
| 9                                          | 473                  | protein localization to organelle                                   |                   |
| GO:0006605                                 | 7.84382676642097e-10 | 33.7959677419355                                                    | 0.557608470002076 |
| 9                                          | 474                  | protein targeting                                                   |                   |
| Tissue: Nerve_Tibial=>Adipose_Subcutaneous |                      | Type: asymmetric                                                    |                   |
| SourceGene:                                | ENSG00000231312.2    |                                                                     |                   |
| TargetGeneSet:                             | AGRN                 | RPL11                                                               | MED8              |
| NRBP1                                      | UBC                  | RPL37A                                                              | DNPEP             |
| MRPS30                                     | BTF3                 | TBCA                                                                | HDAC3             |
| MRPS12                                     | PSMB1                | DGKB                                                                | RP1               |
| PSMB7                                      | RPL35                | RPL12                                                               | WDR5              |
| RPL41                                      | NUP37                | C12orf73                                                            |                   |
| RPL35AP32                                  |                      | AAGAB                                                               | RPS17L            |
| RPL17                                      | RPL19                | KRT23                                                               | DNAJC7            |
| U2AF1                                      | COL18A1              | MTMR3                                                               | PLA2G3            |
| GOBPID                                     | Pvalue               | OddsRatio                                                           | ExpCount          |
| GO:0006415                                 | 7.30962476000486e-25 | 67.8461538461538                                                    | 0.440799944640509 |
| 18                                         | 91                   | translational termination                                           |                   |
| GO:0070972                                 | 2.11551730701453e-24 | 53.7448999801941                                                    | 0.571586741401979 |
| 19                                         | 118                  | protein localization to endoplasmic reticulum                       |                   |
| GO:0006414                                 | 1.18173310704828e-23 | 56.8726790450928                                                    | 0.508615320739049 |
| 18                                         | 105                  | translational elongation                                            |                   |
| GO:0006614                                 | 1.18173310704828e-23 | 56.8726790450928                                                    | 0.508615320739049 |
| 18                                         | 105                  | SRP-dependent cotranslational protein targeting to membrane         |                   |
| GO:0006613                                 | 1.4185688397062e-23  | 56.222465034965                                                     | 0.513459276174659 |
| 106                                        | 106                  | cotranslational protein targeting to membrane                       | 18                |
| GO:0045047                                 | 1.4185688397062e-23  | 56.222465034965                                                     | 0.513459276174659 |
| 106                                        | 106                  | protein targeting to ER                                             | 18                |
| GO:0072599                                 | 1.4185688397062e-23  | 56.222465034965                                                     | 0.513459276174659 |
| 106                                        | 106                  | establishment of protein localization to endoplasmic reticulum      | 18                |
| GO:0000184                                 | 1.29820820228028e-22 | 48.9413556740289                                                    | 0.576430696837589 |
| 18                                         | 119                  | nuclear-transcribed mRNA catabolic process, nonsense-mediated decay |                   |
| GO:0019080                                 | 2.90784919987631e-22 | 40.2155377302436                                                    | 0.731437270777109 |
| 19                                         | 151                  | viral genome expression                                             |                   |
| GO:0019083                                 | 2.90784919987631e-22 | 40.2155377302436                                                    | 0.731437270777109 |
| 19                                         | 151                  | viral transcription                                                 |                   |
| GO:0006413                                 | 3.31201462109142e-22 | 39.9103641456583                                                    | 0.736281226212719 |
| 19                                         | 152                  | translational initiation                                            |                   |
| GO:0006612                                 | 3.76883575150336e-22 | 39.6097453906936                                                    | 0.741125181648329 |
| 19                                         | 153                  | protein targeting to membrane                                       |                   |
| GO:0043624                                 | 1.45617067757464e-20 | 36.5282051282051                                                    | 0.741125181648329 |
| 18                                         | 153                  | cellular protein complex disassembly                                |                   |
| GO:0043241                                 | 2.64230363399189e-20 | 35.2112637362637                                                    | 0.765344958826379 |

STable4\_20PerPair

|                                                             |         |                                                                |                  |                   |                   |                   |        |        |       |
|-------------------------------------------------------------|---------|----------------------------------------------------------------|------------------|-------------------|-------------------|-------------------|--------|--------|-------|
| 18                                                          | 158     | protein complex disassembly                                    |                  |                   |                   |                   |        |        |       |
| GO:0000956                                                  |         | 9.14426211627071e-20                                           | 32.6209882832399 |                   |                   | 0.818628468618089 |        |        |       |
| 18                                                          | 169     | nuclear-transcribed mRNA catabolic process                     |                  |                   |                   |                   |        |        |       |
| GO:0072594                                                  |         | 1.01281337619908e-19                                           | 28.58759936407   | 0.988166908864438 |                   |                   | 19     |        |       |
| 204                                                         |         | establishment of protein localization to organelle             |                  |                   |                   |                   |        |        |       |
| GO:0034623                                                  |         | 1.56212869138555e-19                                           | 31.564349112426  | 0.842848245796139 |                   |                   | 18     |        |       |
| 174                                                         |         | cellular macromolecular complex disassembly                    |                  |                   |                   |                   |        |        |       |
| GO:0006402                                                  |         | 2.36916065429315e-19                                           | 30.7665865384615 |                   |                   | 0.862224067538579 |        |        |       |
| 18                                                          | 178     | mRNA catabolic process                                         |                  |                   |                   |                   |        |        |       |
| GO:0032984                                                  |         | 2.6249639709827e-19                                            | 30.5733397037745 |                   |                   | 0.867068022974189 |        |        |       |
| 18                                                          | 179     | macromolecular complex disassembly                             |                  |                   |                   |                   |        |        |       |
| GO:0022415                                                  |         | 4.40429713301696e-19                                           | 23.5683333333333 |                   |                   | 1.2594284132586   | 20     |        |       |
| 260                                                         |         | viral reproductive process                                     |                  |                   |                   |                   |        |        |       |
| GO:0019058                                                  |         | 1.08752417944434e-18                                           | 24.8992785793563 |                   |                   | 1.11895370562591  |        |        |       |
| 19                                                          | 231     | viral infectious cycle                                         |                  |                   |                   |                   |        |        |       |
| GO:0006401                                                  |         | 3.09399941062075e-18                                           | 26.2743726861374 |                   |                   | 0.993010864300048 |        |        |       |
| 18                                                          | 205     | RNA catabolic process                                          |                  |                   |                   |                   |        |        |       |
| GO:0016032                                                  |         | 6.20298111973668e-18                                           | 15.9534201630543 |                   |                   | 2.18462390146011  |        |        |       |
| 23                                                          | 451     | viral reproduction                                             |                  |                   |                   |                   |        |        |       |
| GO:0071845                                                  |         | 1.03446605192964e-15                                           | 18.3682764603817 |                   |                   | 1.37568334371324  |        |        |       |
| 18                                                          | 284     | cellular component disassembly at cellular level               |                  |                   |                   |                   |        |        |       |
| GO:0022411                                                  |         | 1.32254325251912e-15                                           | 18.0910256410256 |                   |                   | 1.39505916545568  |        |        |       |
| 18                                                          | 288     | cellular component disassembly                                 |                  |                   |                   |                   |        |        |       |
| GO:0006605                                                  |         | 3.8290047218012e-15                                            | 13.1769157994324 |                   |                   | 2.29603487647914  |        |        |       |
| 21                                                          | 474     | protein targeting                                              |                  |                   |                   |                   |        |        |       |
| GO:0033365                                                  |         | 4.76779668040605e-14                                           | 12.2984547461369 |                   |                   | 2.29119092104353  |        |        |       |
| 20                                                          | 473     | protein localization to organelle                              |                  |                   |                   |                   |        |        |       |
| GO:0042254                                                  |         | 2.34275810998796e-09                                           | 17.0767386091127 |                   |                   | 0.721749359905889 |        |        |       |
| 10                                                          | 149     | ribosome biogenesis                                            |                  |                   |                   |                   |        |        |       |
| GO:0022613                                                  |         | 9.86397295395444e-09                                           | 12.3425471249802 |                   |                   | 1.08988997301225  |        |        |       |
| 11                                                          | 225     | ribonucleoprotein complex biogenesis                           |                  |                   |                   |                   |        |        |       |
| GO:0071843                                                  |         | 1.84432686540542e-08                                           | 11.5732233125186 |                   |                   | 1.15770534911079  |        |        |       |
| 11                                                          | 239     | cellular component biogenesis at cellular level                |                  |                   |                   |                   |        |        |       |
| GO:0006364                                                  |         | 6.74004146267171e-07                                           | 16.3619702176403 |                   |                   | 0.503771365303439 |        |        |       |
| 7                                                           | 104     | rRNA processing                                                |                  |                   |                   |                   |        |        |       |
| GO:0016072                                                  |         | 9.86739548870654e-07                                           | 15.4023732470334 |                   |                   | 0.532835097917099 |        |        |       |
| 7                                                           | 110     | rRNA metabolic process                                         |                  |                   |                   |                   |        |        |       |
| GO:0000028                                                  |         | 2.15448756952043e-06                                           | 214.597014925373 |                   |                   | 0.02906373261366  |        |        |       |
| 3                                                           | 6       | ribosomal small subunit assembly                               |                  |                   |                   |                   |        |        |       |
| Tissue: Nerve_Tibial=>Adipose_Subcutaneous                  |         | Type: asymmetric                                               |                  |                   |                   |                   |        |        |       |
| SourceGene: ENSG00000233702.1                               |         |                                                                |                  |                   |                   |                   |        |        |       |
| TargetGeneSet:                                              |         | RPL22                                                          | DLEU2L           | DPYD              | RTCD1             | GNRHR2            | RP11   | RPL37A | RPL32 |
| PTPN23                                                      | SLC52A1 | PVRL3-AS1                                                      | RPL35A           | NKX3-2            | EEF1A1P19         | RPS14             | EEF1A1 |        |       |
| HOXA13                                                      | PEG10   | AHCYL2                                                         | RPS20            | RPL30             | TATDN1            | NELL1             | RPS13  | WNK1   | ATN1  |
| PRPF40B                                                     | RPL41   | RPL14P1                                                        | CAMTA2           | CEP95             | SMARCA4           | ARHGEF1           | SNRPD2 | RPS11  | PI4KA |
| TMEM184B                                                    |         | UBA1                                                           |                  |                   |                   |                   |        |        |       |
| GOBPID                                                      | Pvalue  | OddsRatio                                                      | ExpCount         | Count             | Size              | Term              |        |        |       |
| GO:0006414                                                  |         | 8.48006399289468e-17                                           | 88.2402015677492 |                   |                   | 0.21797799460245  |        |        |       |
| 11                                                          | 105     | translational elongation                                       |                  |                   |                   |                   |        |        |       |
| GO:0006415                                                  |         | 1.59771081355511e-15                                           | 88.5185185185185 |                   |                   | 0.18891426198879  |        |        |       |
| 10                                                          | 91      | translational termination                                      |                  |                   |                   |                   |        |        |       |
| GO:0019080                                                  |         | 5.16753494456863e-15                                           | 59.0567669172932 |                   |                   | 0.313473116047332 |        |        |       |
| 11                                                          | 151     | viral genome expression                                        |                  |                   |                   |                   |        |        |       |
| GO:0019083                                                  |         | 5.16753494456863e-15                                           | 59.0567669172932 |                   |                   | 0.313473116047332 |        |        |       |
| 11                                                          | 151     | viral transcription                                            |                  |                   |                   |                   |        |        |       |
| GO:0006614                                                  |         | 7.04569488407382e-15                                           | 75.4             | 0.21797799460245  |                   | 10                | 105    |        |       |
| SRP-dependent cotranslational protein targeting to membrane |         |                                                                |                  |                   |                   |                   |        |        |       |
| GO:0006613                                                  |         | 7.76977716994345e-15                                           | 74.609375        |                   | 0.220053975503425 |                   |        | 10     |       |
| 106                                                         |         | cotranslational protein targeting to membrane                  |                  |                   |                   |                   |        |        |       |
| GO:0045047                                                  |         | 7.76977716994345e-15                                           | 74.609375        |                   | 0.220053975503425 |                   |        | 10     |       |
| 106                                                         |         | protein targeting to ER                                        |                  |                   |                   |                   |        |        |       |
| GO:0072599                                                  |         | 7.76977716994345e-15                                           | 74.609375        |                   | 0.220053975503425 |                   |        | 10     |       |
| 106                                                         |         | establishment of protein localization to endoplasmic reticulum |                  |                   |                   |                   |        |        |       |

Stable4\_20PerPair

|                                                                    |                      |                                                                     |                   |
|--------------------------------------------------------------------|----------------------|---------------------------------------------------------------------|-------------------|
| GO:0070972                                                         | 2.34128555621209e-14 | 66.2638888888889                                                    | 0.244965746315134 |
| 10                                                                 | 118                  | protein localization to endoplasmic reticulum                       |                   |
| GO:0034623                                                         | 2.51352674312269e-14 | 50.6419115272845                                                    | 0.361220676769774 |
| 11                                                                 | 174                  | cellular macromolecular complex disassembly                         |                   |
| GO:0000184                                                         | 2.55284572541155e-14 | 65.651376146789                                                     | 0.24704172721611  |
| 119                                                                |                      | nuclear-transcribed mRNA catabolic process, nonsense-mediated decay | 10                |
| GO:0032984                                                         | 3.44329372861052e-14 | 49.1174812030075                                                    | 0.371600581274652 |
| 11                                                                 | 179                  | macromolecular complex disassembly                                  |                   |
| GO:0006413                                                         | 3.08501908715246e-13 | 50.2781690140845                                                    | 0.315549096948308 |
| 10                                                                 | 152                  | translational initiation                                            |                   |
| GO:0006612                                                         | 3.29656753823955e-13 | 49.9230769230769                                                    | 0.317625077849284 |
| 10                                                                 | 153                  | protein targeting to membrane                                       |                   |
| GO:0043624                                                         | 3.29656753823955e-13 | 49.9230769230769                                                    | 0.317625077849284 |
| 10                                                                 | 153                  | cellular protein complex disassembly                                |                   |
| GO:0043241                                                         | 4.56222333399732e-13 | 48.2195945945946                                                    | 0.328004982354162 |
| 10                                                                 | 158                  | protein complex disassembly                                         |                   |
| GO:0019058                                                         | 5.73980054119701e-13 | 37.3710526315789                                                    | 0.479551588125389 |
| 11                                                                 | 231                  | viral infectious cycle                                              |                   |
| GO:0000956                                                         | 8.99047406816903e-13 | 44.8490566037736                                                    | 0.350840772264895 |
| 10                                                                 | 169                  | nuclear-transcribed mRNA catabolic process                          |                   |
| GO:0006402                                                         | 1.51432237195242e-12 | 42.4196428571429                                                    | 0.369524600373677 |
| 10                                                                 | 178                  | mRNA catabolic process                                              |                   |
| GO:0022415                                                         | 2.09096768632073e-12 | 32.9511731135067                                                    | 0.539755034253685 |
| 11                                                                 | 260                  | viral reproductive process                                          |                   |
| GO:0071845                                                         | 5.46196938724066e-12 | 30.0034702139965                                                    | 0.589578575877102 |
| 11                                                                 | 284                  | cellular component disassembly at cellular level                    |                   |
| GO:0072594                                                         | 5.92154903042295e-12 | 36.6675257731959                                                    | 0.423500103799045 |
| 10                                                                 | 204                  | establishment of protein localization to organelle                  |                   |
| GO:0006401                                                         | 6.21729949789748e-12 | 36.4769230769231                                                    | 0.425576084700021 |
| 10                                                                 | 205                  | RNA catabolic process                                               |                   |
| GO:0022411                                                         | 6.35672814117802e-12 | 29.5618468554057                                                    | 0.597882499481005 |
| 11                                                                 | 288                  | cellular component disassembly                                      |                   |
| GO:0016032                                                         | 7.74981439820864e-10 | 18.3960526315789                                                    | 0.936267386340046 |
| 11                                                                 | 451                  | viral reproduction                                                  |                   |
| GO:0033365                                                         | 2.14146811280286e-08 | 15.07343412527                                                      | 0.981938966161511 |
| 473                                                                |                      | protein localization to organelle                                   | 10                |
| GO:0006605                                                         | 2.18479789659218e-08 | 15.0398706896552                                                    | 0.984014947062487 |
| 10                                                                 | 474                  | protein targeting                                                   |                   |
| Tissue: Nerve_Tibial=>Adipose_Subcutaneous                         |                      | Type: asymmetric                                                    |                   |
| SourceGene: FAM179A(ENSG00000189350.7)                             |                      |                                                                     |                   |
| TargetGeneSet: RPL22 RPL11 WDR65 RPS8 RPL5 RP11 SSR2 NENF MYCN     |                      |                                                                     |                   |
| FAM179A RPLP0P6 UBC RPL31 CLASP1 LIMS2 MAP2 SPAG16 RPL37A RPL32    |                      |                                                                     |                   |
| RPL15 RPL14 ZNF90P1 RPL24 PVRL3-AS1 RPL35A MSANTD1 RPL34 EEF1A1P19 |                      |                                                                     |                   |
| CTD BTF3 RPS14 CCNG1 TMEM14C RPS10 RPL10A EEF1A1 MRPS12 TNRC18     |                      |                                                                     |                   |
| HOXA13 RABL5 PPAPDC1B RPS20 RPL30 EIF3H CPSF1 RABGAP1 RPL7A        |                      |                                                                     |                   |
| RPS24 C10orf32 PNLIPRP3 OR51C1P RPS13 RIMKLB PFDN5 RPL41 NACA      |                      |                                                                     |                   |
| RPL6 TPT1 SLC25A21 CNIH TIMM9 RSL24D1 RPL4 SKOR1 RPS15A            |                      |                                                                     |                   |
| RPL23A RPL17 RPL19 ROCK1 ELP2 SMARCA4 NOTCH3 RPL18A ARHGEF1 SNRPD2 |                      |                                                                     |                   |
| RPL18 RPS11 C20orf96 EBF4 LINC00493 RP4 DRG1 EIF3L                 |                      |                                                                     |                   |
| RPS4X RPSAP9 RPL10                                                 |                      |                                                                     |                   |
| GOBPID Pvalue OddsRatio ExpCount Count Size Term                   |                      |                                                                     |                   |
| GO:0006414                                                         | 1.6459967607858e-57  | 188.263157894737                                                    | 0.530413120199294 |
| 35                                                                 | 105                  | translational elongation                                            |                   |
| GO:0006415                                                         | 1.70215030519587e-55 | 203.689655172414                                                    | 0.459691370839388 |
| 33                                                                 | 91                   | translational termination                                           |                   |
| GO:0006614                                                         | 2.97791640187156e-55 | 175.672806067172                                                    | 0.530413120199294 |
| 34                                                                 | 105                  | SRP-dependent cotranslational protein targeting to membrane         |                   |
| GO:0006613                                                         | 4.37258017281276e-55 | 173.220797720798                                                    | 0.535464673725002 |
| 34                                                                 | 106                  | cotranslational protein targeting to membrane                       |                   |
| GO:0045047                                                         | 4.37258017281276e-55 | 173.220797720798                                                    | 0.535464673725002 |
| 34                                                                 | 106                  | protein targeting to ER                                             |                   |
| GO:0072599                                                         | 4.37258017281276e-55 | 173.220797720798                                                    | 0.535464673725002 |
| 34                                                                 | 106                  | establishment of protein localization to endoplasmic reticulum      |                   |

Stable4\_20PerPair

|                                            |                             |                                                                     |                    |
|--------------------------------------------|-----------------------------|---------------------------------------------------------------------|--------------------|
| GO:0070972                                 | 3.19846385812202e-53        | 148.350427350427                                                    | 0.596083316033493  |
| 34                                         | 118                         | protein localization to endoplasmic reticulum                       |                    |
| GO:0006413                                 | 5.33433800978301e-51        | 112.266081871345                                                    | 0.76783613590755   |
| 35                                         | 152                         | translational initiation                                            |                    |
| GO:0000184                                 | 6.31192773072493e-51        | 137.103488372093                                                    | 0.6011348695592    |
| 119                                        | 33                          | nuclear-transcribed mRNA catabolic process, nonsense-mediated decay | 33                 |
| GO:0006612                                 | 6.8986947491144e-51         | 111.306868867083                                                    | 0.772887689433257  |
| 35                                         | 153                         | protein targeting to membrane                                       |                    |
| GO:0019080                                 | 4.50595972262906e-49        | 106.262108262108                                                    | 0.762784582381842  |
| 34                                         | 151                         | viral genome expression                                             |                    |
| GO:0019083                                 | 4.50595972262906e-49        | 106.262108262108                                                    | 0.762784582381842  |
| 34                                         | 151                         | viral transcription                                                 |                    |
| GO:0043624                                 | 7.42318269568848e-49        | 104.461538461538                                                    | 0.772887689433257  |
| 34                                         | 153                         | cellular protein complex disassembly                                |                    |
| GO:0034623                                 | 1.01940428041778e-48        | 94.3515713744794                                                    | 0.878970313473116  |
| 35                                         | 174                         | cellular macromolecular complex disassembly                         |                    |
| GO:0043241                                 | 2.50444397395419e-48        | 100.214226633581                                                    | 0.798145457061795  |
| 34                                         | 158                         | protein complex disassembly                                         |                    |
| GO:0032984                                 | 3.0282059262799e-48         | 91.0434941520468                                                    | 0.904228081101654  |
| 35                                         | 179                         | macromolecular complex disassembly                                  |                    |
| GO:0072594                                 | 4.38413104884357e-46        | 77.4392712550607                                                    | 1.03051691924434   |
| 35                                         | 204                         | establishment of protein localization to organelle                  |                    |
| GO:0000956                                 | 2.7940988881495e-45         | 86.3944852941176                                                    | 0.853712545844578  |
| 33                                         | 169                         | nuclear-transcribed mRNA catabolic process                          |                    |
| GO:0006402                                 | 1.81051505713781e-44        | 80.9808620689655                                                    | 0.899176527575946  |
| 33                                         | 178                         | mRNA catabolic process                                              |                    |
| GO:0071845                                 | 1.75932632861188e-42        | 55.4359197907585                                                    | 1.43464120130095   |
| 36                                         | 284                         | cellular component disassembly at cellular level                    |                    |
| GO:0006401                                 | 2.76505748599724e-42        | 68.1392441860465                                                    | 1.03556847277005   |
| 33                                         | 205                         | RNA catabolic process                                               |                    |
| GO:0022411                                 | 2.97990060333806e-42        | 54.5405405405405                                                    | 1.45484741540378   |
| 36                                         | 288                         | cellular component disassembly                                      |                    |
| GO:0019058                                 | 3.00185284970202e-42        | 62.7559547051933                                                    | 1.16690886443845   |
| 34                                         | 231                         | viral infectious cycle                                              |                    |
| GO:0022415                                 | 2.08782623158343e-40        | 54.5913319718629                                                    | 1.31340391668397   |
| 34                                         | 260                         | viral reproductive process                                          |                    |
| GO:0033365                                 | 8.01380570191847e-33        | 29.3138668589281                                                    | 2.38938481765968   |
| 35                                         | 473                         | protein localization to organelle                                   |                    |
| GO:0006605                                 | 8.62989115072256e-33        | 29.2449946049634                                                    | 2.39443637118538   |
| 35                                         | 474                         | protein targeting                                                   |                    |
| GO:0016032                                 | 4.52561273743294e-32        | 29.1873578060628                                                    | 2.27825064009411   |
| 34                                         | 451                         | viral reproduction                                                  |                    |
| GO:0022613                                 | 1.2057844796455e-09         | 13.0824290002309                                                    | 1.1365995432842    |
| 225                                        | 12                          | ribonucleoprotein complex biogenesis                                | 12                 |
| GO:0071843                                 | 2.39667406935383e-09        | 12.2634505669098                                                    | 1.20732129264411   |
| 12                                         | 239                         | cellular component biogenesis at cellular level                     |                    |
| GO:0042254                                 | 3.57386137050076e-09        | 16.2601347493434                                                    | 0.752681475330427  |
| 10                                         | 149                         | ribosome biogenesis                                                 |                    |
| GO:0042273                                 | 2.87680213437773e-07        | 104.130434782609                                                    | 0.0606186423084908 |
| 4                                          | 12                          | ribosomal large subunit biogenesis                                  |                    |
| GO:0006364                                 | 9.00074231039749e-07        | 15.614964073727                                                     | 0.525361566673587  |
| 104                                        | 7                           | rRNA processing                                                     | 7                  |
| GO:0016072                                 | 1.31627386519054e-06        | 14.6991762283024                                                    | 0.555670887827832  |
| 7                                          | 110                         | rRNA metabolic process                                              |                    |
| GO:0030490                                 | 4.26634606660256e-06        | 154.007142857143                                                    | 0.0353608746799529 |
| 3                                          | 7                           | maturation of SSU-rRNA                                              |                    |
| Tissue: Adipose_Subcutaneous=>Nerve_Tibial |                             | Type: asymmetric                                                    |                    |
| SourceGene: GGPS1(ENSG00000152904.7)       |                             |                                                                     |                    |
| TargetGeneSet:                             | PRDM16 RPL11 PABPC4 RPS8    | RPL5 CCDC18 RP11 RP4                                                |                    |
| FAM20B ARL8A                               | SCN9A C2orf88 CFLAR-AS1     | EEF1B2 CTDSPL RPL14 CEP97                                           |                    |
| IGSF11 KPNA1                               | SNX4 EIF4G1 EIF4A2 TIGD2    | ARFIP1 TBC1D9B TRIM38 RPS10                                         |                    |
| RPL10A FOXP4                               | PAQR8 L3MBTL3 MRPS12 SERAC1 | BCAP29 RPS20 EEF1D SCRIB RPS6                                       |                    |
| GRHRP NANS                                 | TLR4 RPL7A RPL13AP5         | ACTR1A RPLP2 RPL27A CTD                                             |                    |



Stable4\_20PerPair

| PTPRJ      | EHD1    | PPP2R5B                                                             | RAB6A            | RPS3              | LETMD1  | ERBB3              | RPL41 | MARS  | RPL6     | EFS |
|------------|---------|---------------------------------------------------------------------|------------------|-------------------|---------|--------------------|-------|-------|----------|-----|
| U6         | TBC1D2B | MIR1225                                                             | ROGDI            | RPS15A            | RPL26   | RPL23A             | CCL18 | RPL17 | FAM171A2 |     |
| KPNA2      | FOXK2   | TWSG1                                                               | TCF3             | RPL36             | ELAVL1  | UBA52              | RPS16 | HIPK4 | TOMM40   |     |
| PPM1N      | RPL18   | TTYH1                                                               | RPL28            | ARFGAP3           | FAM19A5 | MOV10L1            | GPC4  |       |          |     |
| GOBPID     | Pvalue  | OddsRatio                                                           | ExpCount         | Count             | Size    | Term               |       |       |          |     |
| GO:0006414 |         | 5.08858156509752e-37                                                | 101.576704545455 |                   |         | 0.501349387585634  |       |       |          |     |
| 25         | 105     | translational elongation                                            |                  |                   |         |                    |       |       |          |     |
| GO:0006415 |         | 1.13805039329915e-34                                                | 105.25           | 0.434502802574216 |         | 23                 | 91    |       |          |     |
|            |         | translational termination                                           |                  |                   |         |                    |       |       |          |     |
| GO:0000184 |         | 1.38536212841634e-33                                                | 80.2077192982456 |                   |         | 0.568195972597052  |       |       |          |     |
| 24         | 119     | nuclear-transcribed mRNA catabolic process, nonsense-mediated decay |                  |                   |         |                    |       |       |          |     |
| GO:0006614 |         | 4.54893549397025e-33                                                | 87.1951219512195 |                   |         | 0.501349387585634  |       |       |          |     |
| 23         | 105     | SRP-dependent cotranslational protein targeting to membrane         |                  |                   |         |                    |       |       |          |     |
| GO:0006613 |         | 5.79164416485982e-33                                                | 86.1385542168675 |                   |         | 0.506124143657878  |       |       |          |     |
| 23         | 106     | cotranslational protein targeting to membrane                       |                  |                   |         |                    |       |       |          |     |
| GO:0045047 |         | 5.79164416485982e-33                                                | 86.1385542168675 |                   |         | 0.506124143657878  |       |       |          |     |
| 23         | 106     | protein targeting to ER                                             |                  |                   |         |                    |       |       |          |     |
| GO:0072599 |         | 5.79164416485982e-33                                                | 86.1385542168675 |                   |         | 0.506124143657878  |       |       |          |     |
| 23         | 106     | establishment of protein localization to endoplasmic reticulum      |                  |                   |         |                    |       |       |          |     |
| GO:0006413 |         | 1.27574770764564e-32                                                | 63.775053686471  | 0.725762922981109 |         | 25                 |       |       |          |     |
| 152        |         | translational initiation                                            |                  |                   |         |                    |       |       |          |     |
| GO:0070972 |         | 8.71259019175334e-32                                                | 75.1947368421053 |                   |         | 0.563421216524808  |       |       |          |     |
| 23         | 118     | protein localization to endoplasmic reticulum                       |                  |                   |         |                    |       |       |          |     |
| GO:0000956 |         | 2.1436292027501e-31                                                 | 56.1789772727273 |                   |         | 0.806933776209259  |       |       |          |     |
| 25         | 169     | nuclear-transcribed mRNA catabolic process                          |                  |                   |         |                    |       |       |          |     |
| GO:0006401 |         | 7.258606590239e-31                                                  | 47.9768741067949 |                   |         | 0.978824994810048  |       |       |          |     |
| 26         | 205     | RNA catabolic process                                               |                  |                   |         |                    |       |       |          |     |
| GO:0006402 |         | 8.43308013765557e-31                                                | 52.8409090909091 |                   |         | 0.849906580859456  |       |       |          |     |
| 25         | 178     | mRNA catabolic process                                              |                  |                   |         |                    |       |       |          |     |
| GO:0072594 |         | 2.98468906509292e-29                                                | 45.0831640426613 |                   |         | 0.974050238737804  |       |       |          |     |
| 25         | 204     | establishment of protein localization to organelle                  |                  |                   |         |                    |       |       |          |     |
| GO:0019080 |         | 3.8827124741542e-29                                                 | 55.6796875       | 0.720988166908864 |         | 23                 |       |       |          |     |
| 151        |         | viral genome expression                                             |                  |                   |         |                    |       |       |          |     |
| GO:0019083 |         | 3.8827124741542e-29                                                 | 55.6796875       | 0.720988166908864 |         | 23                 |       |       |          |     |
| 151        |         | viral transcription                                                 |                  |                   |         |                    |       |       |          |     |
| GO:0006612 |         | 5.35128619543073e-29                                                | 54.8153846153846 |                   |         | 0.730537679053353  |       |       |          |     |
| 23         | 153     | protein targeting to membrane                                       |                  |                   |         |                    |       |       |          |     |
| GO:0043624 |         | 5.35128619543073e-29                                                | 54.8153846153846 |                   |         | 0.730537679053353  |       |       |          |     |
| 23         | 153     | cellular protein complex disassembly                                |                  |                   |         |                    |       |       |          |     |
| GO:0043241 |         | 1.16992369186893e-28                                                | 52.7666666666667 |                   |         | 0.754411459414573  |       |       |          |     |
| 23         | 158     | protein complex disassembly                                         |                  |                   |         |                    |       |       |          |     |
| GO:0034623 |         | 1.20400417720169e-27                                                | 47.1225165562914 |                   |         | 0.83080755657048   |       |       |          |     |
| 23         | 174     | cellular macromolecular complex disassembly                         |                  |                   |         |                    |       |       |          |     |
| GO:0032984 |         | 2.37796437734916e-27                                                | 45.5961538461538 |                   |         | 0.8546813369317    | 23    |       |          |     |
| 179        |         | macromolecular complex disassembly                                  |                  |                   |         |                    |       |       |          |     |
| GO:0019058 |         | 2.82782745493207e-26                                                | 36.5217391304348 |                   |         | 1.1029686526884    | 24    |       |          |     |
| 231        |         | viral infectious cycle                                              |                  |                   |         |                    |       |       |          |     |
| GO:0022415 |         | 5.10160442095071e-25                                                | 31.9683615819209 |                   |         | 1.24143657878348   |       |       |          |     |
| 24         | 260     | viral reproductive process                                          |                  |                   |         |                    |       |       |          |     |
| GO:0071845 |         | 4.34119211381525e-24                                                | 28.9682051282051 |                   |         | 1.35603072451733   |       |       |          |     |
| 24         | 284     | cellular component disassembly at cellular level                    |                  |                   |         |                    |       |       |          |     |
| GO:0033365 |         | 5.78442278102426e-24                                                | 21.3886544258701 |                   |         | 2.25845962217148   |       |       |          |     |
| 28         | 473     | protein localization to organelle                                   |                  |                   |         |                    |       |       |          |     |
| GO:0022411 |         | 6.08552141405383e-24                                                | 28.5212121212121 |                   |         | 1.37512974880631   |       |       |          |     |
| 24         | 288     | cellular component disassembly                                      |                  |                   |         |                    |       |       |          |     |
| GO:0006605 |         | 6.13020669156525e-24                                                | 21.3391665755223 |                   |         | 2.26323437824372   |       |       |          |     |
| 28         | 474     | protein targeting                                                   |                  |                   |         |                    |       |       |          |     |
| GO:0016032 |         | 2.51014901109774e-19                                                | 17.4301327088212 |                   |         | 2.15341498858211   |       |       |          |     |
| 24         | 451     | viral reproduction                                                  |                  |                   |         |                    |       |       |          |     |
| GO:0042273 |         | 2.2890049584565e-07                                                 | 110.569230769231 |                   |         | 0.0572970728669296 |       |       |          |     |
| 4          | 12      | ribosomal large subunit biogenesis                                  |                  |                   |         |                    |       |       |          |     |
| GO:0042254 |         | 5.19842752494549e-07                                                | 13.2459016393443 |                   |         | 0.711438654764376  |       |       |          |     |
| 8          | 149     | ribosome biogenesis                                                 |                  |                   |         |                    |       |       |          |     |

Stable4\_20PerPair

|                |                                                                     |                  |                   |         |          |                   |         |         |          |      |
|----------------|---------------------------------------------------------------------|------------------|-------------------|---------|----------|-------------------|---------|---------|----------|------|
| GO:0006364     | 6.10181228854743e-07                                                | 16.6270369138676 | 0.49657463151339  |         |          |                   |         |         |          |      |
| 7 104          | rRNA processing                                                     |                  |                   |         |          |                   |         |         |          |      |
| GO:0016072     | 8.93626842774286e-07                                                | 15.651894769809  | 0.525223167946855 | 7       |          |                   |         |         |          |      |
| 110            | rRNA metabolic process                                              |                  |                   |         |          |                   |         |         |          |      |
| GO:0022613     | 1.15438184485564e-06                                                | 9.8375           | 1.07432011625493  | 9 225   |          |                   |         |         |          |      |
|                | ribonucleoprotein complex biogenesis                                |                  |                   |         |          |                   |         |         |          |      |
| GO:0071843     | 1.90358788834925e-06                                                | 9.2295652173913  | 1.14116670126635  | 9       |          |                   |         |         |          |      |
| 239            | cellular component biogenesis at cellular level                     |                  |                   |         |          |                   |         |         |          |      |
| Tissue:        | Nerve_Tibial=>Adipose_Subcutaneous                                  | Type:            | asymmetric        |         |          |                   |         |         |          |      |
| SourceGene:    | HIVEP1(ENSG00000095951.11)                                          |                  |                   |         |          |                   |         |         |          |      |
| TargetGeneSet: | RP3                                                                 | RP1              | RPS8              | BTF3L4  | WDR78    | RP11              | RP4     | GNP5    | RPL5     |      |
| RWDD3          | STXBP3                                                              | HSD3BP4          | ATF6              | PRRC2C  | MRPL55   | RPS7              | CALM2   | UBC     | COA5     |      |
| TXNDC9         | MMADHC                                                              | MTX2             | SEN2              | HIGD1A  | SEMA3G   | PCNP              | RPL24   | YWHAQP6 | RNF7     |      |
| PDCD10         | DNAJC19                                                             | RELL1            | COPS4             | LAMTOR3 | AIMP1    | OSTC              | ANAPC10 | CMBL    | SUB1     | CDK7 |
| ANKRA2         | CETN3                                                               | ERAP1            | CTD               | MATR3   | CTB      | NPM1              | RPL26L1 | U1      | NOL7     |      |
| GPLD1          | EYS                                                                 | IGF2R            | MALSU1            | CBX3    | BET1     | BUD31             | SPDYE2  | HIPK2   | ASPH     |      |
| HEATR7A        | CHMP5                                                               | ATP6V1G1         |                   | RPL12   | SSNA1    | COMMD3            | RPS24   | MARK2P9 | SBF2     |      |
| RPS13          | TSG101                                                              | POLR2G           | PPP6R3            | UCP2    | UBE4A    | NTM               | PFDN5   | ACTR6   | C12orf45 |      |
| TRIAP1         | STARD13                                                             | RFXAP            | MRPS31            | DGKH    | EBPL     | PPP2R3C           | FKBP3   | NEK9    | C14orf80 |      |
| CYFIP1         | SNAP23                                                              | TTBK2            | RPS3AP6           | PPIB    | RAB11A   | RPS17L            | CHTF8   | HSBP1   | DERL2    |      |
| RPL26          | NCOR1                                                               | PRPSAP2          | RPS7P1            | ERN1    | C17orf90 |                   | MYL12A  | MYL12B  | PSMG2    |      |
| C18orf32       |                                                                     | RPS19            | MEGF8             | RPL18   | RPS5     | UBE2V1            | PFDN4   | RPL12P4 | PI4KA    |      |
| GSTT2          | RPS19BP1                                                            |                  | GNL3L             | RPS4X   | PSMD10   | DOCK11            | SSR4    |         |          |      |
| GOBPID         | Pvalue                                                              | OddsRatio        | ExpCount          | Count   | Size     | Term              |         |         |          |      |
| GO:0006614     | 5.31853245541676e-18                                                | 32.8850475367329 |                   |         |          | 0.682997716421009 |         |         |          |      |
| 16 105         | SRP-dependent cotranslational protein targeting to membrane         |                  |                   |         |          |                   |         |         |          |      |
| GO:0006613     | 6.23205818299822e-18                                                | 32.5173789173789 |                   |         |          | 0.6895024565774   | 16      |         |          |      |
| 106            | cotranslational protein targeting to membrane                       |                  |                   |         |          |                   |         |         |          |      |
| GO:0045047     | 6.23205818299822e-18                                                | 32.5173789173789 |                   |         |          | 0.6895024565774   | 16      |         |          |      |
| 106            | protein targeting to ER                                             |                  |                   |         |          |                   |         |         |          |      |
| GO:0072599     | 6.23205818299822e-18                                                | 32.5173789173789 |                   |         |          | 0.6895024565774   | 16      |         |          |      |
| 106            | establishment of protein localization to endoplasmic reticulum      |                  |                   |         |          |                   |         |         |          |      |
| GO:0006415     | 1.81309748591631e-17                                                | 35.6787141905396 |                   |         |          | 0.591931354231541 |         |         |          |      |
| 15 91          | translational termination                                           |                  |                   |         |          |                   |         |         |          |      |
| GO:0070972     | 3.70104721246605e-17                                                | 28.667672197084  | 0.767559338454086 |         |          |                   | 16      |         |          |      |
| 118            | protein localization to endoplasmic reticulum                       |                  |                   |         |          |                   |         |         |          |      |
| GO:0019080     | 8.92631084441153e-17                                                | 23.4339019189765 |                   |         |          | 0.982215763614975 |         |         |          |      |
| 17 151         | viral genome expression                                             |                  |                   |         |          |                   |         |         |          |      |
| GO:0019083     | 8.92631084441153e-17                                                | 23.4339019189765 |                   |         |          | 0.982215763614975 |         |         |          |      |
| 17 151         | viral transcription                                                 |                  |                   |         |          |                   |         |         |          |      |
| GO:0006414     | 1.71210179137508e-16                                                | 30.0991561181435 |                   |         |          | 0.682997716421009 |         |         |          |      |
| 15 105         | translational elongation                                            |                  |                   |         |          |                   |         |         |          |      |
| GO:0072594     | 8.18501634781108e-16                                                | 18.0445670628183 |                   |         |          | 1.32696699190367  |         |         |          |      |
| 18 204         | establishment of protein localization to organelle                  |                  |                   |         |          |                   |         |         |          |      |
| GO:0000184     | 1.18437393455805e-15                                                | 26.0217867575463 |                   |         |          | 0.774064078610477 |         |         |          |      |
| 15 119         | nuclear-transcribed mRNA catabolic process, nonsense-mediated decay |                  |                   |         |          |                   |         |         |          |      |
| GO:0006612     | 2.54076105251855e-15                                                | 21.2914093206064 |                   |         |          | 0.995225243927756 |         |         |          |      |
| 16 153         | protein targeting to membrane                                       |                  |                   |         |          |                   |         |         |          |      |
| GO:0022415     | 3.92873589992143e-15                                                | 14.8383955739972 |                   |         |          | 1.69123244066155  |         |         |          |      |
| 19 260         | viral reproductive process                                          |                  |                   |         |          |                   |         |         |          |      |
| GO:0019058     | 7.34008832451422e-15                                                | 15.7272053372869 |                   |         |          | 1.50259497612622  |         |         |          |      |
| 18 231         | viral infectious cycle                                              |                  |                   |         |          |                   |         |         |          |      |
| GO:0006413     | 4.82600731905916e-14                                                | 19.7080291970803 |                   |         |          | 0.988720503771365 |         |         |          |      |
| 15 152         | translational initiation                                            |                  |                   |         |          |                   |         |         |          |      |
| GO:0043624     | 5.32295636403822e-14                                                | 19.563841496973  | 0.995225243927756 |         |          |                   | 15      |         |          |      |
| 153            | cellular protein complex disassembly                                |                  |                   |         |          |                   |         |         |          |      |
| GO:0043241     | 8.59927424657248e-14                                                | 18.8731521642914 |                   |         |          | 1.02774894470971  |         |         |          |      |
| 15 158         | protein complex disassembly                                         |                  |                   |         |          |                   |         |         |          |      |
| GO:0000956     | 2.33426310187263e-13                                                | 17.5115074798619 |                   |         |          | 1.09930108643     | 15      |         |          |      |
| 169            | nuclear-transcribed mRNA catabolic process                          |                  |                   |         |          |                   |         |         |          |      |
| GO:0034623     | 3.58973326371703e-13                                                | 16.9548602818247 |                   |         |          | 1.13182478721196  |         |         |          |      |
| 15 174         | cellular macromolecular complex disassembly                         |                  |                   |         |          |                   |         |         |          |      |
| GO:0006402     | 5.01601595084808e-13                                                | 16.5341306204861 |                   |         |          | 1.15784374783752  |         |         |          |      |

STable4\_20PerPair

|                                            |         |                                                                    |                  |                  |        |                   |        |                   |         |      |
|--------------------------------------------|---------|--------------------------------------------------------------------|------------------|------------------|--------|-------------------|--------|-------------------|---------|------|
| 15                                         | 178     | mRNA catabolic process                                             |                  |                  |        |                   |        |                   |         |      |
| GO:0032984                                 |         | 5.4465081225471e-13                                                | 16.4321549861068 |                  |        |                   |        | 1.16434848799391  |         |      |
| 15                                         | 179     | macromolecular complex disassembly                                 |                  |                  |        |                   |        |                   |         |      |
| GO:0006401                                 |         | 3.9367873386225e-12                                                | 14.1575616255829 |                  |        |                   |        | 1.33347173206007  |         |      |
| 15                                         | 205     | RNA catabolic process                                              |                  |                  |        |                   |        |                   |         |      |
| GO:0016032                                 |         | 8.11184977974904e-12                                               | 8.73267699253778 |                  |        |                   |        | 2.93363781053214  |         |      |
| 20                                         | 451     | viral reproduction                                                 |                  |                  |        |                   |        |                   |         |      |
| GO:0033365                                 |         | 1.58270085419441e-10                                               | 7.75791483113069 |                  |        |                   |        | 3.07674209397274  |         |      |
| 19                                         | 473     | protein localization to organelle                                  |                  |                  |        |                   |        |                   |         |      |
| GO:0006605                                 |         | 1.64045588855248e-10                                               | 7.74030769230769 |                  |        |                   |        | 3.08324683412913  |         |      |
| 19                                         | 474     | protein targeting                                                  |                  |                  |        |                   |        |                   |         |      |
| GO:0071845                                 |         | 4.02602609314716e-10                                               | 9.94400263517011 |                  |        |                   |        | 1.84734620441492  |         |      |
| 15                                         | 284     | cellular component disassembly at cellular level                   |                  |                  |        |                   |        |                   |         |      |
| GO:0022411                                 |         | 4.88941229822078e-10                                               | 9.79552093476144 |                  |        |                   |        | 1.87336516504048  |         |      |
| 15                                         | 288     | cellular component disassembly                                     |                  |                  |        |                   |        |                   |         |      |
| GO:0042254                                 |         | 4.32489332404076e-08                                               | 12.1771154504967 |                  |        |                   |        | 0.969206283302194 |         |      |
| 10                                         | 149     | ribosome biogenesis                                                |                  |                  |        |                   |        |                   |         |      |
| GO:0042274                                 |         | 8.381618333336861e-08                                              | 61.9878997407087 |                  |        |                   |        | 0.11708532281503  |         |      |
| 5                                          | 18      | ribosomal small subunit biogenesis                                 |                  |                  |        |                   |        |                   |         |      |
| GO:0022613                                 |         | 2.26870176916479e-07                                               | 8.75875464474721 |                  |        |                   |        | 1.46356653518788  |         |      |
| 11                                         | 225     | ribonucleoprotein complex biogenesis                               |                  |                  |        |                   |        |                   |         |      |
| GO:0071843                                 |         | 4.15216692928138e-07                                               | 8.21279856267174 |                  |        |                   |        | 1.55463289737734  |         |      |
| 11                                         | 239     | cellular component biogenesis at cellular level                    |                  |                  |        |                   |        |                   |         |      |
| GO:0006364                                 |         | 4.99793810148488e-06                                               | 11.8284156890627 |                  |        |                   |        | 0.676492976264618 |         |      |
| 7                                          | 104     | rRNA processing                                                    |                  |                  |        |                   |        |                   |         |      |
| GO:0016072                                 |         | 7.25372287208501e-06                                               | 11.1346947885281 |                  |        |                   |        | 0.715521417202962 |         |      |
| 7                                          | 110     | rRNA metabolic process                                             |                  |                  |        |                   |        |                   |         |      |
| Tissue: Adipose_Subcutaneous=>Nerve_Tibial |         | Type: asymmetric                                                   |                  |                  |        |                   |        |                   |         |      |
| SourceGene: HR(ENSG00000168453.10)         |         |                                                                    |                  |                  |        |                   |        |                   |         |      |
| TargetGeneSet:                             |         | IGSF21                                                             | C1QA             | C1QC             | C1QB   | RPS6KA1           | LAPTM5 | CSF3R             | BRD8    |      |
| MRPS21                                     | CTSS    | CD84                                                               | ARHGAP30         |                  | PTPRC  | TLR5              | SP140L | GPX1              | UBA7    |      |
| STAB1                                      | PDE6B   | SH3TC1                                                             | DTHD1            | TLR1             | TLR6   | NSUN7             | DAPP1  | FYB               | GZMA    |      |
| SEPT8                                      | PCDHA1  | CSF1R                                                              | CD74             | DOCK2            | RP11   | F13A1             | LY86   | AIF1              | HLA-DRA |      |
| HLA-DMB                                    | HLA-DMA | HLA-DOA                                                            | DEFA6            | MKRNP2           | FGD2   | VNN1              | VNN3   | IPCEF1            | AOAH    | TFEC |
| TBXAS1                                     | MKRN1   | CTSB                                                               | MSR1             | ADAM28           | DOCK8  | SYK               | FGD3   | COL27A1           | GGTA1P  | MRC1 |
| ASCL2                                      | MS4A6A  | MS4A7                                                              | CARNS1           | FOLR2            | KCNE3  | SLCO2B1           | IL10RA | AMICA1            | CD3G    |      |
| SORL1                                      | SLC37A2 | KCNJ5                                                              | C11orf45         |                  | CD4    | PTPN6             | CLEC7A | BIN2              | NCKAP1L | LYZ  |
| YEATS4                                     | SELPLG  | P2RX4                                                              | LCP1             | ITGAM            | DPEP2  | IRF8              | ADAP2  | EVI2B             | EVI2A   | MPO  |
| AANAT                                      | TMC8    | HMHA1                                                              | VAV1             | EMR1             | STXBP2 | MYO1F             | LRRC25 | GMIP              | NUDT19  |      |
| CEACAM21                                   |         | CD37                                                               | SIGLEC9          | CD33             | FPR3   | ZNF766            | LILRB5 | LILRA4            | LAIR1   |      |
| LILRB4                                     | RPL28   | ITGB2                                                              | NFAM1            | KLHDC7B          | CSF2RA | TLR7              | TLR8   | CXorf21           | CYBB    |      |
| GPR34                                      | WAS     | BTK                                                                |                  |                  |        |                   |        |                   |         |      |
| GOBPID                                     | Pvalue  | OddsRatio                                                          | ExpCount         | Count            | Size   | Term              |        |                   |         |      |
| GO:0050778                                 |         | 5.83421819973224e-17                                               | 12.5164556962025 |                  |        | 2.59442253131271  |        |                   |         |      |
| 24                                         | 364     | positive regulation of immune response                             |                  |                  |        |                   |        |                   |         |      |
| GO:0002253                                 |         | 1.37762253364924e-16                                               | 13.7969425502518 |                  |        | 2.1311327935783   | 22     |                   |         |      |
| 299                                        |         | activation of immune response                                      |                  |                  |        |                   |        |                   |         |      |
| GO:0002757                                 |         | 3.63045077197809e-15                                               | 14.798721340388  | 1.67497059027057 |        |                   | 19     |                   |         |      |
| 235                                        |         | immune response-activating signal transduction                     |                  |                  |        |                   |        |                   |         |      |
| GO:0002764                                 |         | 9.77356183820755e-15                                               | 13.9457787481805 |                  |        | 1.76762853781745  |        |                   |         |      |
| 19                                         | 248     | immune response-regulating signaling pathway                       |                  |                  |        |                   |        |                   |         |      |
| GO:0002429                                 |         | 5.35930412653596e-13                                               | 18.8089887640449 |                  |        | 0.947962078748876 |        |                   |         |      |
| 14                                         | 133     | immune response-activating cell surface receptor signaling pathway |                  |                  |        |                   |        |                   |         |      |
| GO:0002768                                 |         | 1.61754876053476e-12                                               | 17.2041486603284 |                  |        | 1.02636495744239  |        |                   |         |      |
| 14                                         | 144     | immune response-regulating cell surface receptor signaling pathway |                  |                  |        |                   |        |                   |         |      |
| GO:0050851                                 |         | 3.62165101025428e-12                                               | 18.6963636363636 |                  |        | 0.876686734482043 |        |                   |         |      |
| 13                                         | 123     | antigen receptor-mediated signaling pathway                        |                  |                  |        |                   |        |                   |         |      |
| GO:0042110                                 |         | 9.66559309237516e-12                                               | 9.88258745358609 |                  |        | 2.27368348211196  |        |                   |         |      |
| 18                                         | 319     | T cell activation                                                  |                  |                  |        |                   |        |                   |         |      |
| GO:0050867                                 |         | 1.26412827960321e-11                                               | 11.5960591133005 |                  |        | 1.71060826240399  |        |                   |         |      |
| 16                                         | 240     | positive regulation of cell activation                             |                  |                  |        |                   |        |                   |         |      |
| GO:0050870                                 |         | 1.70490997099201e-11                                               | 14.2184212409647 |                  |        | 1.21880838696284  |        |                   |         |      |
| 14                                         | 171     | positive regulation of T cell activation                           |                  |                  |        |                   |        |                   |         |      |

Stable4\_20PerPair

|            |                                                                       |                  |                   |    |
|------------|-----------------------------------------------------------------------|------------------|-------------------|----|
| GO:0046649 | 2.29891985491694e-11                                                  | 8.1303421920126  | 3.08622240675386  | 20 |
| 433        | lymphocyte activation                                                 |                  |                   |    |
| GO:0051251 | 3.05709522713005e-11                                                  | 12.0579545454545 | 1.5324199017369   | 15 |
| 215        | positive regulation of lymphocyte activation                          |                  |                   |    |
| GO:0050865 | 3.22243936891259e-11                                                  | 9.13715837104072 | 2.44474430835236  |    |
| 18         | 343 regulation of cell activation                                     |                  |                   |    |
| GO:0002696 | 9.57221723963338e-11                                                  | 11.0482693911593 | 1.6607155214172   | 15 |
| 233        | positive regulation of leukocyte activation                           |                  |                   |    |
| GO:0002694 | 1.04518405122587e-10                                                  | 9.13203794369645 | 2.28793855096533  |    |
| 17         | 321 regulation of leukocyte activation                                |                  |                   |    |
| GO:0051249 | 1.49271123631121e-10                                                  | 9.69891084420337 | 2.01709224275137  |    |
| 16         | 283 regulation of lymphocyte activation                               |                  |                   |    |
| GO:0002252 | 2.22586293386065e-10                                                  | 8.04475703324808 | 2.75122828869974  |    |
| 18         | 386 immune effector process                                           |                  |                   |    |
| GO:0050863 | 5.2475924152608e-10                                                   | 10.7460239917494 | 1.575185108297    | 14 |
| 221        | regulation of T cell activation                                       |                  |                   |    |
| GO:0006954 | 2.59299777239302e-08                                                  | 6.17588189182127 | 3.29292090512767  |    |
| 17         | 462 inflammatory response                                             |                  |                   |    |
| GO:0002521 | 2.9071042411463e-08                                                   | 7.6794631710362  | 2.15251539685835  | 14 |
| 302        | leukocyte differentiation                                             |                  |                   |    |
| GO:0050852 | 3.38874650811354e-08                                                  | 15.168085106383  | 0.705625908241644 | 9  |
| 99         | T cell receptor signaling pathway                                     |                  |                   |    |
| GO:0001817 | 3.55661817144971e-08                                                  | 6.93908562367865 | 2.5587848591793   | 15 |
| 359        | regulation of cytokine production                                     |                  |                   |    |
| GO:0031294 | 5.75323042297869e-08                                                  | 17.9494108405342 | 0.534565082001246 |    |
| 8          | 75 lymphocyte costimulation                                           |                  |                   |    |
| GO:0031295 | 5.75323042297869e-08                                                  | 17.9494108405342 | 0.534565082001246 |    |
| 8          | 75 T cell costimulation                                               |                  |                   |    |
| GO:0001816 | 1.24326396961947e-07                                                  | 6.26555023923445 | 2.81537609853989  |    |
| 15         | 395 cytokine production                                               |                  |                   |    |
| GO:0002250 | 1.60882790896458e-07                                                  | 9.05434782608696 | 1.41125181648329  |    |
| 11         | 198 adaptive immune response                                          |                  |                   |    |
| GO:0030098 | 2.17512041569067e-07                                                  | 8.76914845685965 | 1.45401702304339  |    |
| 11         | 204 lymphocyte differentiation                                        |                  |                   |    |
| GO:0002443 | 3.0535618324637e-07                                                   | 8.45804347826087 | 1.50390976403017  |    |
| 11         | 211 leukocyte mediated immunity                                       |                  |                   |    |
| GO:0002504 | 3.98933557411334e-07                                                  | 43.0102040816327 | 0.156805757387032 |    |
| 5          | 22 antigen processing and presentation of peptide or polysaccharide   |                  |                   |    |
|            | antigen via MHC class II                                              |                  |                   |    |
| GO:0045619 | 5.07255268071156e-07                                                  | 13.1932909196067 | 0.705625908241644 |    |
| 8          | 99 regulation of lymphocyte differentiation                           |                  |                   |    |
| GO:0045058 | 6.36646490171908e-07                                                  | 38.4774436090226 | 0.171060826240399 |    |
| 5          | 24 T cell selection                                                   |                  |                   |    |
| GO:0042742 | 7.15487089420626e-07                                                  | 10.3114119922631 | 1.00498235416234  |    |
| 9          | 141 defense response to bacterium                                     |                  |                   |    |
| GO:0030097 | 9.43330894915396e-07                                                  | 5.28865665584416 | 3.30004843955436  |    |
| 15         | 463 hemopoiesis                                                       |                  |                   |    |
| GO:0030217 | 1.66945045570303e-06                                                  | 9.24945722970039 | 1.11189537056259  |    |
| 9          | 156 T cell differentiation                                            |                  |                   |    |
| GO:0050853 | 1.72916770905549e-06                                                  | 30.4506802721088 | 0.206698498373815 |    |
| 5          | 29 B cell receptor signaling pathway                                  |                  |                   |    |
| GO:0048534 | 2.16492874544693e-06                                                  | 4.92471590909091 | 3.52812954120822  |    |
| 15         | 495 hemopoietic or lymphoid organ development                         |                  |                   |    |
| GO:0042108 | 3.75664466245746e-06                                                  | 16.6835246061078 | 0.420524531174313 |    |
| 6          | 59 positive regulation of cytokine biosynthetic process               |                  |                   |    |
| GO:0071346 | 4.68617126705722e-06                                                  | 11.9524664750958 | 0.669988236108228 |    |
| 7          | 94 cellular response to interferon-gamma                              |                  |                   |    |
| GO:0045621 | 5.03771779945367e-06                                                  | 15.7864506627393 | 0.441907134454363 |    |
| 6          | 62 positive regulation of lymphocyte differentiation                  |                  |                   |    |
| GO:0045577 | 5.39412032474818e-06                                                  | 44.5532245532246 | 0.121168085253616 |    |
| 4          | 17 regulation of B cell differentiation                               |                  |                   |    |
| GO:0002460 | 5.67703879311226e-06                                                  | 7.89114299851559 | 1.29008373122967  |    |
| 9          | 181 adaptive immune response based on somatic recombination of immune |                  |                   |    |

Stable4\_20PerPair

| GO ID      | Count | Description                                                                       | Pvalue               | OddsRatio        | ExpCount           | Count | Size | Term             |
|------------|-------|-----------------------------------------------------------------------------------|----------------------|------------------|--------------------|-------|------|------------------|
| GO:0019886 | 3     | receptors built from immunoglobulin superfamily domains                           | 6.92478501404327e-06 | 143.45           | 0.0427652065600996 | 3     | 6    |                  |
| GO:0042116 | 5     | antigen processing and presentation of exogenous peptide antigen via MHC class II | 6.94617424957758e-06 | 22.1320346320346 | 0.270846308213964  | 5     | 38   |                  |
| GO:0050900 | 10    | macrophage activation                                                             | 8.38207304992738e-06 | 6.57124237769399 | 1.71773579683067   | 10    | 241  |                  |
| GO:0002274 | 7     | leukocyte migration                                                               | 1.10692443349267e-05 | 10.3891666666667 | 0.76264618365511   | 7     | 107  |                  |
| GO:0034341 | 7     | myeloid leukocyte activation                                                      | 1.40863437765481e-05 | 9.98677884615385 | 0.791156321361843  | 7     | 111  |                  |
| GO:0030593 | 5     | response to interferon-gamma                                                      | 1.45280962225576e-05 | 18.7192569335426 | 0.313611514774064  | 5     | 44   |                  |
| GO:0019724 | 7     | neutrophil chemotaxis                                                             | 1.67707201985632e-05 | 9.70473130841122 | 0.812538924641893  | 7     | 114  |                  |
| GO:0002275 | 5     | B cell mediated immunity                                                          | 1.81314245547875e-05 | 17.8036336485814 | 0.327866583627431  | 5     | 46   |                  |
| GO:0002495 | 3     | myeloid cell activation involved in immune response                               | 1.91888241560716e-05 | 86.058           | 0.0570202754134662 | 3     | 8    |                  |
| GO:0045059 | 3     | antigen processing and presentation of peptide antigen via MHC class II           | 1.91888241560716e-05 | 86.058           | 0.0570202754134662 | 3     | 8    |                  |
|            |       | positive thymic T cell selection                                                  |                      |                  |                    |       |      |                  |
|            |       | Tissue: Nerve_Tibial=>Adipose_Subcutaneous                                        |                      |                  |                    |       |      | Type: asymmetric |
|            |       | SourceGene: JAZF1-AS1(ENSG00000234336.1)                                          |                      |                  |                    |       |      |                  |
|            |       | TargetGeneSet: RPL11 TMEM50A KHDRBS1 RP4 RP11 NRBP1 UBC RPL31 MCM6                |                      |                  |                    |       |      |                  |
|            |       | RPL37A AAMP RPL32 RPL14 RPL24 BTLA MBNL1 RPL35A PPP2R2C RPL34                     |                      |                  |                    |       |      |                  |
|            |       | ADAMTS16 TBCA MAT2B STC2 CSNK2B RPS10 RPL10A RPL39P3 MRPS12 ECD                   |                      |                  |                    |       |      |                  |
|            |       | ARF5 LEP BIN3 RPL30 RPS6 PSMB7 RPL35 RPL12 RPL7A MRVI1-AS1                        |                      |                  |                    |       |      |                  |
|            |       | RNF121 RPS25 RPL41 RPL14P1 POLR1D C14orf119 ANKDD1A RPL35AP32                     |                      |                  |                    |       |      |                  |
|            |       | RPS17L RPL17 RPL19 CTIF TLE6 TLE2 UBA52 ZNF14 XRCC1 PTGIR                         |                      |                  |                    |       |      |                  |
|            |       | SLC1A5 RPS9 RPL28 U2AF1 NHP2L1 SAMM50 RPL10                                       |                      |                  |                    |       |      |                  |
|            |       | GOBPID Pvalue OddsRatio ExpCount Count Size Term                                  |                      |                  |                    |       |      |                  |
| GO:0006415 | 91    | translational termination                                                         | 2.19924758994353e-41 | 169.602272727273 | 0.3589370977787    | 25    | 25   |                  |
| GO:0000184 | 26    | nuclear-transcribed mRNA catabolic process, nonsense-mediated decay               | 3.45602585800618e-40 | 128.971904266389 | 0.469379281710608  | 26    | 119  |                  |
| GO:0006414 | 105   | translational elongation                                                          | 1.29833321434107e-39 | 139.78515625     | 0.414158189744654  | 25    | 25   |                  |
| GO:0006614 | 105   | SRP-dependent cotranslational protein targeting to membrane                       | 1.29833321434107e-39 | 139.78515625     | 0.414158189744654  | 25    | 25   |                  |
| GO:0006613 | 25    | cotranslational protein targeting to membrane                                     | 1.69541091254078e-39 | 138.049768518519 | 0.418102553456508  | 25    | 106  |                  |
| GO:0045047 | 25    | protein targeting to ER                                                           | 1.69541091254078e-39 | 138.049768518519 | 0.418102553456508  | 25    | 106  |                  |
| GO:0072599 | 25    | establishment of protein localization to endoplasmic reticulum                    | 1.69541091254078e-39 | 138.049768518519 | 0.418102553456508  | 25    | 106  |                  |
| GO:0070972 | 25    | protein localization to endoplasmic reticulum                                     | 3.38396096066161e-38 | 120.136088709677 | 0.465434917998754  | 25    | 118  |                  |
| GO:0006413 | 152   | translational initiation                                                          | 3.70068139013524e-37 | 94.973886328725  | 0.599543284201785  | 26    | 26   |                  |
| GO:0006612 | 26    | protein targeting to membrane                                                     | 4.44900001617343e-37 | 94.2194564389129 | 0.603487647913639  | 26    | 153  |                  |
| GO:0000956 | 169   | nuclear-transcribed mRNA catabolic process                                        | 7.15594190037722e-36 | 83.58357771261   | 0.666597467303301  | 26    | 169  |                  |
| GO:0019080 | 25    | viral genome expression                                                           | 2.8308522503373e-35  | 88.4672619047619 | 0.595598920489931  | 25    | 151  |                  |
| GO:0019083 | 25    | viral transcription                                                               | 2.8308522503373e-35  | 88.4672619047619 | 0.595598920489931  | 25    | 151  |                  |
| GO:0006402 | 26    | mRNA catabolic process                                                            | 3.01470694724752e-35 | 78.5848896434635 | 0.702096740709986  | 26    | 178  |                  |
| GO:0043624 | 153   | cellular protein complex disassembly                                              | 4.03244913386787e-35 | 87.07275390625   | 0.603487647913639  | 25    | 153  |                  |
| GO:0043241 | 25    | protein complex disassembly                                                       | 9.55427181679984e-35 | 83.7699718045113 | 0.623209466472908  | 25    | 158  |                  |

Stable4\_20PerPair

|                                            |                      |                                                             |                    |
|--------------------------------------------|----------------------|-------------------------------------------------------------|--------------------|
| GO:0034623                                 | 1.24961935582655e-33 | 74.6906459731544                                            | 0.68631928586257   |
| 25                                         | 174                  | cellular macromolecular complex disassembly                 |                    |
| GO:0072594                                 | 1.27699410546344e-33 | 66.9836897426604                                            | 0.804650197218186  |
| 26                                         | 204                  | establishment of protein localization to organelle          |                    |
| GO:0006401                                 | 1.45941791563992e-33 | 66.6047936565147                                            | 0.808594560930039  |
| 26                                         | 205                  | RNA catabolic process                                       |                    |
| GO:0032984                                 | 2.64709413072781e-33 | 72.2402597402597                                            | 0.706041104421839  |
| 25                                         | 179                  | macromolecular complex disassembly                          |                    |
| GO:0019058                                 | 2.09619562885012e-30 | 53.807645631068                                             | 0.91114801743824   |
| 231                                        |                      | viral infectious cycle                                      | 25                 |
| GO:0022415                                 | 4.42228106329537e-29 | 47.0711436170213                                            | 1.025534565082     |
| 260                                        |                      | viral reproductive process                                  | 25                 |
| GO:0071845                                 | 4.23392337754159e-28 | 42.636944980695                                             | 1.12019929416649   |
| 284                                        |                      | cellular component disassembly at cellular level            | 25                 |
| GO:0022411                                 | 6.04763774659291e-28 | 41.9765922053232                                            | 1.13597674901391   |
| 25                                         | 288                  | cellular component disassembly                              |                    |
| GO:0033365                                 | 2.18099658442602e-25 | 28.1461883408072                                            | 1.86568403570687   |
| 27                                         | 473                  | protein localization to organelle                           |                    |
| GO:0006605                                 | 2.30795948470955e-25 | 28.0812080536913                                            | 1.86962839941873   |
| 27                                         | 474                  | protein targeting                                           |                    |
| GO:0016032                                 | 1.74358332784865e-24 | 27.5669070208729                                            | 1.77890803404609   |
| 26                                         | 451                  | viral reproduction                                          |                    |
| GO:0022613                                 | 1.56171695073804e-08 | 14.0316674913409                                            | 0.887481835167116  |
| 10                                         | 225                  | ribonucleoprotein complex biogenesis                        |                    |
| GO:0071843                                 | 2.77218191947728e-08 | 13.1608287652142                                            | 0.94270292713307   |
| 10                                         | 239                  | cellular component biogenesis at cellular level             |                    |
| GO:0042254                                 | 1.14025121156735e-07 | 16.5036908380373                                            | 0.587710193066224  |
| 8                                          | 149                  | ribosome biogenesis                                         |                    |
| GO:0000028                                 | 1.153971806579e-06   | 266.5                                                       | 0.0236661822711231 |
|                                            |                      | ribosomal small subunit assembly                            | 3                  |
| GO:0042273                                 | 1.248183947148e-05   | 88.7962962962963                                            | 0.0473323645422462 |
| 3                                          | 12                   | ribosomal large subunit biogenesis                          | 6                  |
| Tissue: Nerve_Tibial=>Adipose_Subcutaneous |                      | Type: asymmetric                                            |                    |
| SourceGene: NANOS3(ENSG00000187556.5)      |                      |                                                             |                    |
| TargetGeneSet:                             | RPL22                | SPEN                                                        | CDC42              |
| RPL5                                       | EEF1A1P11            | SNX7                                                        | RPS27              |
| ANKRD36BP2                                 | TXNDC9               | MMADHC                                                      | SEN2               |
| RPL15                                      | RPL29                | DNAH1                                                       | RPL10AP6           |
| RPL35A                                     | COPS4                | EEF1A1P9                                                    | RPL34              |
| EEF1A1P19                                  | BTF3                 | RPS23                                                       | SKP1               |
| RPS10                                      | RPL10A               | GLO1                                                        | EEF1A1             |
| VPS41                                      | RPS3AP26             | BUD31                                                       | FAM3C              |
| ELAVL2                                     | UBAP2                | CLTA                                                        | HNRNPK             |
| COMMD3                                     | CCNY                 | VN1R53P                                                     | CDH23              |
| RPL27A                                     | RPS13                | TSG101                                                      | RPS3               |
| RPLP0                                      | TPT1                 | EBPL                                                        | EAPP               |
| TTBK2                                      | RSL24D1              | RPS3AP6                                                     | RAB11A             |
| RPL26                                      | RPL17P43             | RPS7P1                                                      | SUPT6H             |
| RPS2P48                                    | USP36                | MYL12A                                                      | MYL12B             |
| RPS19                                      | MEGF8                | CEACAMP2                                                    | RPL18              |
| RPL41P1                                    | PFDN4                | RPL12P4                                                     | PI4KA              |
| RPS4X                                      | RPSAP14              | RPL10                                                       | VBP1               |
| GOBPID                                     | Pvalue               | OddsRatio                                                   | ExpCount           |
| GO:0006414                                 | 3.84591570766492e-71 | 154.567796610169                                            | Count              |
| 46                                         | 105                  | translational elongation                                    | Size               |
| GO:0006415                                 | 2.16196924424638e-70 | 180.731454859114                                            | Term               |
| 44                                         | 91                   | translational termination                                   |                    |
| GO:0006614                                 | 5.76736347202654e-69 | 146.640410958904                                            | 0.857380112102969  |
| 45                                         | 105                  | SRP-dependent cotranslational protein targeting to membrane |                    |
| GO:0006613                                 | 9.9720990216942e-69  | 144.226364248821                                            | 0.86554563698014   |
| 45                                         | 106                  | cotranslational protein targeting to membrane               |                    |
| GO:0045047                                 | 9.9720990216942e-69  | 144.226364248821                                            | 0.86554563698014   |
| 45                                         | 106                  | protein targeting to ER                                     |                    |

Stable4\_20PerPair

|                                            |                      |                                                                     |                    |    |     |
|--------------------------------------------|----------------------|---------------------------------------------------------------------|--------------------|----|-----|
| GO:0072599                                 | 9.9720990216942e-69  | 144.226364248821                                                    | 0.86554563698014   |    |     |
| 45                                         | 106                  | establishment of protein localization to endoplasmic reticulum      |                    |    |     |
| GO:0070972                                 | 3.53917697518047e-68 | 126.544367283951                                                    | 0.963531935506193  |    |     |
| 46                                         | 118                  | protein localization to endoplasmic reticulum                       |                    |    |     |
| GO:0000184                                 | 8.06624369212832e-64 | 113.036396396396                                                    | 0.971697460383364  |    |     |
| 44                                         | 119                  | nuclear-transcribed mRNA catabolic process, nonsense-mediated decay |                    |    |     |
| GO:0006413                                 | 4.47527293437489e-62 | 85.7497379454927                                                    | 1.24115978133001   |    |     |
| 46                                         | 152                  | translational initiation                                            |                    |    |     |
| GO:0006612                                 | 5.28819604002475e-60 | 81.1929223744292                                                    | 1.24932530620718   |    |     |
| 45                                         | 153                  | protein targeting to membrane                                       |                    |    |     |
| GO:0019080                                 | 2.14721967205047e-58 | 79.0532962869411                                                    | 1.23299425645284   |    |     |
| 44                                         | 151                  | viral genome expression                                             |                    |    |     |
| GO:0019083                                 | 2.14721967205047e-58 | 79.0532962869411                                                    | 1.23299425645284   |    |     |
| 44                                         | 151                  | viral transcription                                                 |                    |    |     |
| GO:0043624                                 | 4.19910718122264e-58 | 77.5918670964543                                                    | 1.24932530620718   |    |     |
| 44                                         | 153                  | cellular protein complex disassembly                                |                    |    |     |
| GO:0043241                                 | 2.14664627476667e-57 | 74.1626363205311                                                    | 1.29015293059304   |    |     |
| 44                                         | 158                  | protein complex disassembly                                         |                    |    |     |
| GO:0000956                                 | 6.31798476616127e-56 | 67.584                                                              | 1.37997370424192   | 44 | 169 |
| nuclear-transcribed mRNA catabolic process |                      |                                                                     |                    |    |     |
| GO:0072594                                 | 2.16423941995547e-55 | 57.3180379746835                                                    | 1.66576707494291   |    |     |
| 46                                         | 204                  | establishment of protein localization to organelle                  |                    |    |     |
| GO:0034623                                 | 2.69901455226841e-55 | 64.9617463617464                                                    | 1.42080132862778   |    |     |
| 44                                         | 174                  | cellular macromolecular complex disassembly                         |                    |    |     |
| GO:0006402                                 | 8.3276990259618e-55  | 63.0048406615571                                                    | 1.45346342813646   |    |     |
| 44                                         | 178                  | mRNA catabolic process                                              |                    |    |     |
| GO:0032984                                 | 1.09859669494889e-54 | 62.5337337337337                                                    | 1.46162895301363   |    |     |
| 44                                         | 179                  | macromolecular complex disassembly                                  |                    |    |     |
| GO:0006401                                 | 8.30988327641433e-52 | 52.339096860836                                                     | 1.67393259982008   | 44 |     |
| 205                                        |                      | RNA catabolic process                                               |                    |    |     |
| GO:0019058                                 | 5.51750453719069e-51 | 46.8857711003093                                                    | 1.88623624662653   |    |     |
| 45                                         | 231                  | viral infectious cycle                                              |                    |    |     |
| GO:0022415                                 | 1.68418515003962e-48 | 40.4784963364129                                                    | 2.12303646806449   |    |     |
| 45                                         | 260                  | viral reproductive process                                          |                    |    |     |
| GO:0071845                                 | 4.07200278512508e-45 | 34.9150900900901                                                    | 2.3190090651166    | 44 |     |
| 284                                        |                      | cellular component disassembly at cellular level                    |                    |    |     |
| GO:0022411                                 | 7.77280592205043e-45 | 34.3329641116526                                                    | 2.35167116462529   |    |     |
| 44                                         | 288                  | cellular component disassembly                                      |                    |    |     |
| GO:0033365                                 | 4.26057834754705e-39 | 21.610427825167                                                     | 3.86229326690194   | 47 |     |
| 473                                        |                      | protein localization to organelle                                   |                    |    |     |
| GO:0016032                                 | 1.01124457558609e-38 | 21.9714677640604                                                    | 3.68265171960418   |    |     |
| 46                                         | 451                  | viral reproduction                                                  |                    |    |     |
| GO:0006605                                 | 9.99924074929472e-38 | 20.7564252336449                                                    | 3.87045879177912   |    |     |
| 46                                         | 474                  | protein targeting                                                   |                    |    |     |
| GO:0042254                                 | 1.12936693832616e-12 | 15.4314592088103                                                    | 1.2166632066985    | 15 |     |
| 149                                        |                      | ribosome biogenesis                                                 |                    |    |     |
| GO:0022613                                 | 3.99845339492456e-11 | 10.6006191950464                                                    | 1.8372430973635    | 16 |     |
| 225                                        |                      | ribonucleoprotein complex biogenesis                                |                    |    |     |
| GO:0042274                                 | 5.97449731042717e-11 | 82.1081081081081                                                    | 0.14697944778908   |    |     |
| 7                                          | 18                   | ribosomal small subunit biogenesis                                  |                    |    |     |
| GO:0071843                                 | 9.87685386521456e-11 | 9.92526158445441                                                    | 1.9515604456439    | 16 |     |
| 239                                        |                      | cellular component biogenesis at cellular level                     |                    |    |     |
| GO:0006364                                 | 7.90125225689655e-10 | 15.7411315445684                                                    | 0.849214587225798  |    |     |
| 11                                         | 104                  | rRNA processing                                                     |                    |    |     |
| GO:0016072                                 | 1.44970325921689e-09 | 14.7808930425753                                                    | 0.898207736488824  |    |     |
| 11                                         | 110                  | rRNA metabolic process                                              |                    |    |     |
| GO:0042273                                 | 2.52226602828915e-08 | 90.5562579013907                                                    | 0.0979862985260536 |    |     |
| 5                                          | 12                   | ribosomal large subunit biogenesis                                  |                    |    |     |
| GO:0034470                                 | 8.3984688957256e-08  | 8.51766358892011                                                    | 1.63310497543423   |    |     |
| 12                                         | 200                  | ncRNA processing                                                    |                    |    |     |
| GO:0034660                                 | 3.64835798864627e-06 | 5.83039601907526                                                    | 2.32717458999377   |    |     |
| 12                                         | 285                  | ncRNA metabolic process                                             |                    |    |     |
| GO:0030490                                 | 1.81382042849368e-05 | 93.45                                                               | 0.0571586741401979 | 3  | 7   |

STable4\_20PerPair

maturation of SSU-rRNA

Tissue: Nerve\_Tibial=>Adipose\_Subcutaneous

Type: cluster

SourceGene: NANOS3(ENSG00000187556.5)

| TargetGeneSet: | RPL22     | SPEN     | CDC42    | RP11     | RPS8     | RPS15AP10 | BTF3L4   | RP4       |
|----------------|-----------|----------|----------|----------|----------|-----------|----------|-----------|
| RPL5           | EEF1A1P11 | SNX7     | RPS27    | PRRC2C   | ARPC5    | RPS7      | UBC      | DUSP11    |
| ANKRD36BP2     | TXNDC9    | MMADHC   | SEN2     | EEF1B2   | ASIC4    | TRNT1     | RPL32    | UBE2E1    |
| RPL15          | RPL29     | DNAH1    | RPL10AP6 | RP13     | PCNP     | RPL24     | C3orf17  | TPRG1-AS2 |
| RPL35A         | COPS4     | EEF1A1P9 |          | RPL34    | OSTC     | CCDC109B  | RPS3A    | CTD       |
| EEF1A1P19      | BTF3      | RPS23    | SKP1     | CTB      | RPS14    | RPL15P3   | GPLD1    | MCFD2P1   |
| RPS10          | RPL10A    | GLO1     | EEF1A1   | MRPS12   | IGF2R    | ANKRD61   | EEF1A1P6 | MALSU1    |
| VPS41          | RPS3AP26  | BUD31    | FAM3C    | ARF5     | RPL7     | EIF3H     | RPL8     | RPS6      |
| ELAVL2         | UBAP2     | CLTA     | HNRNPK   | ATP6V1G1 |          | RPL12     | EEF1A1P5 | RPL7A     |
| COMMD3         | CCNY      | VN1R53P  | CDH23    | RPS24    | RPS3AP5  | RPL13AP5  | SFR1     | LHPP      |
| RPL27A         | RPS13     | TSGL1    | RPS3     | SETP17   | PHB2     | CMAS      | H3F3C    | MYF6      |
| RPLP0          | TPT1      | EBPL     | EAPP     | FKBP3    | RPL32P29 |           | CGRRF1   | JKAMP     |
| TTBK2          | RSL24D1   | RPS3AP6  | RAB11A   | RPL4     | MORF4L1  | SEC11A    | RPS15A   | RRN3P2    |
| RPL26          | RPL17P43  |          | RPS7P1   | SUPT6H   | RPL23A   | RPL19     | STAT5A   | RPL27     |
| RPS2P48        | USP36     | MYL12A   | MYL12B   | VAPA     | PSMG2    | RPL17     | RPS15    | PIP5K1C   |
| RPS19          | MEGF8     | CEACAMP2 |          | RPL18    | RPL13A   | ACPT      | RPS9     | RPS5      |
| RPL41P1        | PFDN4     | RPL12P4  | PI4KA    | EIF3L    | RPL3     | GS1       | RP6      | PDZD11    |
| RPS4X          | RPSAP14   | RPL10    | VBP1     |          |          |           |          | RPS23P8   |

| GOBPID     | Pvalue | OddsRatio            | ExpCount         | Count            | Size | Term                                                                |
|------------|--------|----------------------|------------------|------------------|------|---------------------------------------------------------------------|
| GO:0006414 |        | 3.84591570766492e-71 | 154.567796610169 |                  |      | 0.857380112102969                                                   |
| 46         | 105    |                      |                  |                  |      | translational elongation                                            |
| GO:0006415 |        | 2.16196924424638e-70 | 180.731454859114 |                  |      | 0.743062763822573                                                   |
| 44         | 91     |                      |                  |                  |      | translational termination                                           |
| GO:0006614 |        | 5.76736347202654e-69 | 146.640410958904 |                  |      | 0.857380112102969                                                   |
| 45         | 105    |                      |                  |                  |      | SRP-dependent cotranslational protein targeting to membrane         |
| GO:0006613 |        | 9.9720990216942e-69  | 144.226364248821 |                  |      | 0.86554563698014                                                    |
| 45         | 106    |                      |                  |                  |      | cotranslational protein targeting to membrane                       |
| GO:0045047 |        | 9.9720990216942e-69  | 144.226364248821 |                  |      | 0.86554563698014                                                    |
| 45         | 106    |                      |                  |                  |      | protein targeting to ER                                             |
| GO:0072599 |        | 9.9720990216942e-69  | 144.226364248821 |                  |      | 0.86554563698014                                                    |
| 45         | 106    |                      |                  |                  |      | establishment of protein localization to endoplasmic reticulum      |
| GO:0070972 |        | 3.53917697518047e-68 | 126.544367283951 |                  |      | 0.963531935506193                                                   |
| 46         | 118    |                      |                  |                  |      | protein localization to endoplasmic reticulum                       |
| GO:0000184 |        | 8.06624369212832e-64 | 113.036396396396 |                  |      | 0.971697460383364                                                   |
| 44         | 119    |                      |                  |                  |      | nuclear-transcribed mRNA catabolic process, nonsense-mediated decay |
| GO:0006413 |        | 4.47527293437489e-62 | 85.7497379454927 |                  |      | 1.24115978133001                                                    |
| 46         | 152    |                      |                  |                  |      | translational initiation                                            |
| GO:0006612 |        | 5.28819604002475e-60 | 81.1929223744292 |                  |      | 1.24932530620718                                                    |
| 45         | 153    |                      |                  |                  |      | protein targeting to membrane                                       |
| GO:0019080 |        | 2.14721967205047e-58 | 79.0532962869411 |                  |      | 1.23299425645284                                                    |
| 44         | 151    |                      |                  |                  |      | viral genome expression                                             |
| GO:0019083 |        | 2.14721967205047e-58 | 79.0532962869411 |                  |      | 1.23299425645284                                                    |
| 44         | 151    |                      |                  |                  |      | viral transcription                                                 |
| GO:0043624 |        | 4.19910718122264e-58 | 77.5918670964543 |                  |      | 1.24932530620718                                                    |
| 44         | 153    |                      |                  |                  |      | cellular protein complex disassembly                                |
| GO:0043241 |        | 2.14664627476667e-57 | 74.1626363205311 |                  |      | 1.29015293059304                                                    |
| 44         | 158    |                      |                  |                  |      | protein complex disassembly                                         |
| GO:0000956 |        | 6.31798476616127e-56 | 67.584           | 1.37997370424192 | 44   | 169                                                                 |
|            |        |                      |                  |                  |      | nuclear-transcribed mRNA catabolic process                          |
| GO:0072594 |        | 2.16423941995547e-55 | 57.3180379746835 |                  |      | 1.66576707494291                                                    |
| 46         | 204    |                      |                  |                  |      | establishment of protein localization to organelle                  |
| GO:0034623 |        | 2.69901455226841e-55 | 64.9617463617464 |                  |      | 1.42080132862778                                                    |
| 44         | 174    |                      |                  |                  |      | cellular macromolecular complex disassembly                         |
| GO:0006402 |        | 8.3276990259618e-55  | 63.0048406615571 |                  |      | 1.45346342813646                                                    |
| 44         | 178    |                      |                  |                  |      | mRNA catabolic process                                              |
| GO:0032984 |        | 1.09859669494889e-54 | 62.5337337337337 |                  |      | 1.46162895301363                                                    |
| 44         | 179    |                      |                  |                  |      | macromolecular complex disassembly                                  |
| GO:0006401 |        | 8.30988327641433e-52 | 52.339096860836  | 1.67393259982008 |      | 44                                                                  |
| 205        |        |                      |                  |                  |      | RNA catabolic process                                               |
| GO:0019058 |        | 5.51750453719069e-51 | 46.8857711003093 |                  |      | 1.88623624662653                                                    |



STable4\_20PerPair

|            |     |                                                  |                  |                    |  |  |                    |    |
|------------|-----|--------------------------------------------------|------------------|--------------------|--|--|--------------------|----|
| 45         | 231 | viral infectious cycle                           |                  |                    |  |  |                    |    |
| GO:0022415 |     | 1.68418515003962e-48                             | 40.4784963364129 |                    |  |  | 2.12303646806449   |    |
| 45         | 260 | viral reproductive process                       |                  |                    |  |  |                    |    |
| GO:0071845 |     | 4.07200278512508e-45                             | 34.9150900900901 |                    |  |  | 2.3190090651166    | 44 |
| 284        |     | cellular component disassembly at cellular level |                  |                    |  |  |                    |    |
| GO:0022411 |     | 7.77280592205043e-45                             | 34.3329641116526 |                    |  |  | 2.35167116462529   |    |
| 44         | 288 | cellular component disassembly                   |                  |                    |  |  |                    |    |
| GO:0033365 |     | 4.26057834754705e-39                             | 21.610427825167  | 3.86229326690194   |  |  |                    | 47 |
| 473        |     | protein localization to organelle                |                  |                    |  |  |                    |    |
| GO:0016032 |     | 1.01124457558609e-38                             | 21.9714677640604 |                    |  |  | 3.68265171960418   |    |
| 46         | 451 | viral reproduction                               |                  |                    |  |  |                    |    |
| GO:0006605 |     | 9.99924074929472e-38                             | 20.7564252336449 |                    |  |  | 3.87045879177912   |    |
| 46         | 474 | protein targeting                                |                  |                    |  |  |                    |    |
| GO:0042254 |     | 1.12936693832616e-12                             | 15.4314592088103 |                    |  |  | 1.2166632066985    | 15 |
| 149        |     | ribosome biogenesis                              |                  |                    |  |  |                    |    |
| GO:0022613 |     | 3.99845339492456e-11                             | 10.6006191950464 |                    |  |  | 1.8372430973635    | 16 |
| 225        |     | ribonucleoprotein complex biogenesis             |                  |                    |  |  |                    |    |
| GO:0042274 |     | 5.97449731042717e-11                             | 82.1081081081081 |                    |  |  | 0.14697944778908   |    |
| 7          | 18  | ribosomal small subunit biogenesis               |                  |                    |  |  |                    |    |
| GO:0071843 |     | 9.87685386521456e-11                             | 9.92526158445441 |                    |  |  | 1.9515604456439    | 16 |
| 239        |     | cellular component biogenesis at cellular level  |                  |                    |  |  |                    |    |
| GO:0006364 |     | 7.90125225689655e-10                             | 15.7411315445684 |                    |  |  | 0.849214587225798  |    |
| 11         | 104 | rRNA processing                                  |                  |                    |  |  |                    |    |
| GO:0016072 |     | 1.44970325921689e-09                             | 14.7808930425753 |                    |  |  | 0.898207736488824  |    |
| 11         | 110 | rRNA metabolic process                           |                  |                    |  |  |                    |    |
| GO:0042273 |     | 2.52226602828915e-08                             | 90.5562579013907 |                    |  |  | 0.0979862985260536 |    |
| 5          | 12  | ribosomal large subunit biogenesis               |                  |                    |  |  |                    |    |
| GO:0034470 |     | 8.3984688957256e-08                              | 8.51766358892011 |                    |  |  | 1.63310497543423   |    |
| 12         | 200 | ncRNA processing                                 |                  |                    |  |  |                    |    |
| GO:0034660 |     | 3.64835798864627e-06                             | 5.83039601907526 |                    |  |  | 2.32717458999377   |    |
| 12         | 285 | ncRNA metabolic process                          |                  |                    |  |  |                    |    |
| GO:0030490 |     | 1.81382042849368e-05                             | 93.45            | 0.0571586741401979 |  |  | 3                  | 7  |

maturation of SSU-rRNA

Tissue: Nerve\_Tibial=>Adipose\_Subcutaneous

Type: cluster

SourceGene: NHSL2(ENSG00000204131.6)

|                |           |         |           |          |          |          |              |         |           |
|----------------|-----------|---------|-----------|----------|----------|----------|--------------|---------|-----------|
| TargetGeneSet: | AGRN      | MRPL20  | RPL22     | SPEN     | HSPG2    | RPL11    | SYF2         | ARID1A  | RP4       |
| RPS8           | BTF3L4    | TM2D1   | GNG5      | CCBL2    | RPL5     | RP11     | STXBP3       | HBXIP   | ATP5F1    |
| RAP1A          | SRGAP2P1  |         | MRPS21    | RPS27    | C1orf43  | CKS1B    | DAP3         | SSR2    | PMF1      |
| PRRC2C         | GAS5      | ZBTB37  | CR2       | C1orf132 |          | NENF     | TOMM20       | ACP1    | RPS7      |
| C2orf28        | COX7A2L   | PREPL   | SPTBN1    | UBC      | CCDC104  | C1D      | GMCL1        | SNRPG   | TPRKB     |
| DGUOK          | DGUOK-AS1 |         | DCTN1     | VAMP5    | ANKRD36  | COA5     | MITD1        | RPL31   | RANBP2    |
| GPR17          | MMADHC    | ARL6IP6 | SNORA70F  |          | HAT1     | UBE2E3   | SEN2         | NBEAL1  | EEF1B2    |
| RPL37A         | USP37     | MFF     | GIGYF2    | RPL32    | TBC1D5   | RPL15    | EIF1B        | RPL14   | SS18L2    |
| LAMB2          | NICN1     | RAD54L2 | RPL29     | SPCS1    | KCTD6    | RPL10AP6 |              | CTD     | RP13      |
| C3orf26        | NIT2      | PCNP    | RPL24     | ZBTB20   | CNBP     | RNF7     | RNF13        | PHC3    | RPL22L1   |
| DNAJC19        | EIF4G1    | PPP1R2  | RPL35A    | MRFAP1L1 |          | CNO      | C4orf52      | OCIAD1  | MTHFD2L   |
| ENOPH1         | COPS4     | LAMTOR3 | UBE2D3    | CISD2    | RPL34    | RPS3A    | ERCC4        | NIPBL   | EEF1A1P19 |
| MRPS36         | TAF9      | BTF3    | TBCA      | COX7C    | HSPD1P11 |          | EPB41L4A-AS1 | HINT1   | SKP1      |
| PCDHGB3        | HDAC3     | CTB     | RPS14     | CCNG1    | NUDCD2   | MAT2B    | NPM1         | MSX2    | GNB2L1    |
| LYRM4          | TMEM14C   | RPL15P3 | CSNK2B    | C6orf48  | CUTA     | RPS10    | RPL10A       | GLO1    | C6orf130  |
| MRPL32         | RPL39P3   | EEF1A1  | WDR11     | CCNC     | MRPS12   | SF3B5    | C6orf72      | RP3     | IGF2R     |
| SFT2D1         | PSMB1     | RP1     | LSM5      | OGDH     | STAG3L4  | C7orf23  | RPS3AP26     |         | CUX1      |
| DUS4L          | FAM3C     | NDUFA5  | ARF5      | MTPN     | ZC3HAV1L |          | BRAF         | TRPV6   | RHEB      |
| HMBX1          | PPAPDC1B  |         | GOLGA7    | KAT6A    | C8orf40  | HOOK3    | TCEA1        | RPS20   | SNHG6     |
| ZFAND1         | RPL30     | POLR2K  | EIF3E     | EIF3H    | TATDN1   | EEF1D    | CPSF1        | RPL8    | SNAPC3    |
| CHMP5          | TLN1      | RGP1    | CLTA      | SEC61B   | INVS     | ATP6V1G1 |              | PSMB7   | RPL35     |
| RPL12          | EEF1A1P5  |         | RPL7A     | C10orf31 |          | RAB18    | ZFAND4       | VPS26A  | RPS24     |
| RPS3AP5        | RPL13AP5  |         | DNMBP-AS1 |          | NDUFB8   | GBF1     | SFR1         | NHLRC2  | IGF2      |
| RPL27A         | RPS13     | TSG101  | EIF3M     | CKAP5    | AHNAK    | FAU      | PPP6R3       | LAMTOR1 | SPCS2     |
| CCDC90B        | TMEM126B  |         | SDHD      | ZBTB16   | UBE4A    | ATP5L    | RPS25        | THYN1   | WNK1      |
| C12orf57       |           | PHB2    | SCAF11    | MLL4     | PFDN5    | PRR13    | ITGA7        | RPL41   | CNPY2     |
| LRP1           | NAP1L1    | EEA1    | USP44     | RPL18AP3 |          | ISCU     | ARPC3        | VPS29   | C12orf51  |
| RPL6           | RPLP0     | ZNF891  | RPSAP54   | MRP63    | POLR1D   | RFXAP    | DGKH         | TPT1    | ZC3H13    |

Stable4\_20PerPair

| MED4       | MZT1     | CCNB1IP1                                                            | OXA1L            | PPP2R3C          | RPS29            | RPL36A           | DNAAF2  | KLHDC2  | CNIH    |      |
|------------|----------|---------------------------------------------------------------------|------------------|------------------|------------------|------------------|---------|---------|---------|------|
| CGRRF1     | JKAMP    | C14orf142                                                           | DYNC1H1          | SIVA1            | RPS20P33         |                  | PGBD4   | CDAN1   | B2M     |      |
| RSL24D1    | GTF2A2   | RPS3AP6                                                             | RPS27L           | USP3             | RPL4             | MYO9A            | RCN2    | MORF4L1 | RPS17L  |      |
| C15orf40   |          | SEC11A                                                              | MEF2A            | MPG              | RGS11            | ARHGDI1          | TSC2    | SRRM2   | TCEB2   |      |
| RPS15A     | METTL9   | SRCAP                                                               | NAE1             | ZFH3             | CDYL2            | MLYCD            | ANKRD11 | DERL2   | GABARAP |      |
| RPL26      | RPL17P43 |                                                                     | RPS7P1           | SDF2             | SUPT6H           | RPL23A           | TAOK1   | ZNHIT3  | RPL17   |      |
| RPL19      | SMARCE1  | RPL27                                                               | RPS7P11          | MRPL10           | HOXB-AS5         |                  | SUPT4H1 | SUMO2   | MYL12B  |      |
| PSMG2      | C18orf21 |                                                                     | C18orf32         |                  | RPS15            | OAZ1             | NFIC    | RPL36   | NDUFA11 |      |
| EIF3G      | WDR83OS  | ASNA1                                                               | C19orf53         |                  | FAM32A           | RPL18A           | UBA52   | RPSAP58 | SDHAF1  |      |
| EIF3K      | RPS16    | EID2B                                                               | FBL              | RPS19            | ZNF222           | SNRPD2           | RPL18   | RPL13A  | RPS11   | RPS9 |
| CCDC106    | RPS5     | SNRPB2                                                              | CHMP4B           | EIF2S2           | PHF20            | IFT52            | NCOA3   | DPM1    | PFDN4   |      |
| RPL12P4    | RPS21    | U2AF1                                                               | THAP7            | ASLP1            | MYH9             | MPST             | EIF3L   | RPL3    | ST13    |      |
| PACSIN2    | ATXN10   | UXT                                                                 | WASF4P           | WDR45            | CACNA1F          | HUWE1            | RPS23P8 | RPS4X   | APOOL   |      |
| RPL39      | RAP2C    | SSR4                                                                | RPL10            | MXRA5P1          |                  |                  |         |         |         |      |
| GOBPID     | Pvalue   | OddsRatio                                                           | ExpCount         | Count            | Size             | Term             |         |         |         |      |
| GO:0006614 |          | 6.45106691204202e-89                                                | 105.339485827291 | 105.339485827291 |                  | 2.28150301017231 |         |         |         |      |
| 68         | 105      | SRP-dependent cotranslational protein targeting to membrane         |                  |                  |                  |                  |         |         |         |      |
| GO:0006613 |          | 1.76910328103097e-88                                                | 102.560119811724 | 102.560119811724 |                  | 2.30323161026919 |         |         |         |      |
| 68         | 106      | cotranslational protein targeting to membrane                       |                  |                  |                  |                  |         |         |         |      |
| GO:0045047 |          | 1.76910328103097e-88                                                | 102.560119811724 | 102.560119811724 |                  | 2.30323161026919 |         |         |         |      |
| 68         | 106      | protein targeting to ER                                             |                  |                  |                  |                  |         |         |         |      |
| GO:0072599 |          | 1.76910328103097e-88                                                | 102.560119811724 | 102.560119811724 |                  | 2.30323161026919 |         |         |         |      |
| 68         | 106      | establishment of protein localization to endoplasmic reticulum      |                  |                  |                  |                  |         |         |         |      |
| GO:0070972 |          | 1.01327684636074e-83                                                | 77.8793495934959 | 77.8793495934959 |                  | 2.56397481143173 |         |         |         |      |
| 68         | 118      | protein localization to endoplasmic reticulum                       |                  |                  |                  |                  |         |         |         |      |
| GO:0006415 |          | 4.12166115428914e-83                                                | 119.690202517789 | 119.690202517789 |                  | 1.977302608816   |         |         |         | 62   |
| 91         |          | translational termination                                           |                  |                  |                  |                  |         |         |         |      |
| GO:0006414 |          | 6.02087294137304e-83                                                | 91.9984939759036 | 91.9984939759036 |                  | 2.28150301017231 |         |         |         |      |
| 65         | 105      | translational elongation                                            |                  |                  |                  |                  |         |         |         |      |
| GO:0006413 |          | 1.28380404644126e-78                                                | 50.7024335721181 | 50.7024335721181 |                  | 3.30274721472562 |         |         |         |      |
| 71         | 152      | translational initiation                                            |                  |                  |                  |                  |         |         |         |      |
| GO:0000184 |          | 5.7399879383646e-76                                                 | 65.5453090909091 | 65.5453090909091 |                  | 2.58570341152861 |         |         |         |      |
| 64         | 119      | nuclear-transcribed mRNA catabolic process, nonsense-mediated decay |                  |                  |                  |                  |         |         |         |      |
| GO:0006612 |          | 5.55466429894088e-75                                                | 47.116472303207  | 47.116472303207  | 3.3244758148225  | 69               | 153     |         |         |      |
|            |          | protein targeting to membrane                                       |                  |                  |                  |                  |         |         |         |      |
| GO:0019080 |          | 1.6869994287557e-70                                                 | 43.995825426945  | 43.995825426945  | 3.28101861462875 |                  |         |         |         | 66   |
| 151        |          | viral genome expression                                             |                  |                  |                  |                  |         |         |         |      |
| GO:0019083 |          | 1.6869994287557e-70                                                 | 43.995825426945  | 43.995825426945  | 3.28101861462875 |                  |         |         |         | 66   |
| 151        |          | viral transcription                                                 |                  |                  |                  |                  |         |         |         |      |
| GO:0072594 |          | 2.09893799234257e-67                                                | 30.7646895015316 | 30.7646895015316 |                  | 4.43263441976334 |         |         |         |      |
| 71         | 204      | establishment of protein localization to organelle                  |                  |                  |                  |                  |         |         |         |      |
| GO:0043624 |          | 3.50991874841927e-65                                                | 39.1749003984064 | 39.1749003984064 |                  | 3.3244758148225  |         |         |         | 63   |
| 153        |          | cellular protein complex disassembly                                |                  |                  |                  |                  |         |         |         |      |
| GO:0000956 |          | 6.23368157818651e-65                                                | 35.2233935742972 | 35.2233935742972 |                  | 3.67213341637257 |         |         |         |      |
| 65         | 169      | nuclear-transcribed mRNA catabolic process                          |                  |                  |                  |                  |         |         |         |      |
| GO:0043241 |          | 4.27394447510369e-64                                                | 37.0998532187041 | 37.0998532187041 |                  | 3.4331188153069  |         |         |         | 63   |
| 158        |          | protein complex disassembly                                         |                  |                  |                  |                  |         |         |         |      |
| GO:0034623 |          | 6.13749421481952e-64                                                | 33.5956670719576 | 33.5956670719576 |                  | 3.78077641685696 |         |         |         |      |
| 65         | 174      | cellular macromolecular complex disassembly                         |                  |                  |                  |                  |         |         |         |      |
| GO:0006402 |          | 3.59616494836834e-63                                                | 32.3971994171376 | 32.3971994171376 |                  | 3.86769081724448 |         |         |         |      |
| 65         | 178      | mRNA catabolic process                                              |                  |                  |                  |                  |         |         |         |      |
| GO:0032984 |          | 5.5496516129275e-63                                                 | 32.1107235961389 | 32.1107235961389 |                  | 3.88941941734136 |         |         |         |      |
| 65         | 179      | macromolecular complex disassembly                                  |                  |                  |                  |                  |         |         |         |      |
| GO:0019058 |          | 8.50117794730148e-59                                                | 23.6977405356876 | 23.6977405356876 |                  | 5.01930662237907 |         |         |         |      |
| 68         | 231      | viral infectious cycle                                              |                  |                  |                  |                  |         |         |         |      |
| GO:0006401 |          | 1.62730505587054e-58                                                | 26.0988238668962 | 26.0988238668962 |                  | 4.45436301986022 |         |         |         |      |
| 65         | 205      | RNA catabolic process                                               |                  |                  |                  |                  |         |         |         |      |
| GO:0022415 |          | 6.22967086396807e-55                                                | 20.0766429539295 | 20.0766429539295 |                  | 5.64943602518857 |         |         |         |      |
| 68         | 260      | viral reproductive process                                          |                  |                  |                  |                  |         |         |         |      |
| GO:0071845 |          | 2.0982633911219e-48                                                 | 16.590013020117  | 16.590013020117  | 6.17092242751367 |                  |         |         |         | 65   |
| 284        |          | cellular component disassembly at cellular level                    |                  |                  |                  |                  |         |         |         |      |
| GO:0022411 |          | 5.47737384812519e-48                                                | 16.2877519044789 | 16.2877519044789 |                  | 6.25783682790118 |         |         |         |      |
| 65         | 288      | cellular component disassembly                                      |                  |                  |                  |                  |         |         |         |      |

Stable4\_20PerPair

|                 |                                                                     |                  |                        |
|-----------------|---------------------------------------------------------------------|------------------|------------------------|
| GO:0016032      | 1.89508869020437e-45                                                | 11.4848548918366 | 9.79959864369248       |
| 75 451          | viral reproduction                                                  |                  |                        |
| GO:0033365      | 5.82016907928885e-45                                                | 11.0517960332748 | 10.2776278458238       |
| 76 473          | protein localization to organelle                                   |                  |                        |
| GO:0006605      | 6.81526150444609e-45                                                | 11.0232253705502 | 10.2993564459207       |
| 76 474          | protein targeting                                                   |                  |                        |
| GO:0071843      | 9.69179643666664e-16                                                | 7.33553615112802 | 5.19313542315411       |
| 31 239          | cellular component biogenesis at cellular level                     |                  |                        |
| GO:0022613      | 1.01318606176089e-14                                                | 7.2375402792696  | 4.8889350217978 29 225 |
|                 | ribonucleoprotein complex biogenesis                                |                  |                        |
| GO:0042274      | 1.19067414683568e-14                                                | 73.2814710042433 | 0.391114801743824      |
| 11 18           | ribosomal small subunit biogenesis                                  |                  |                        |
| GO:0042254      | 1.44127100552919e-14                                                | 9.27691034482759 | 3.23756141443499       |
| 24 149          | ribosome biogenesis                                                 |                  |                        |
| GO:0006364      | 8.80285104973583e-12                                                | 9.93549654305468 | 2.25977441007543       |
| 18 104          | rRNA processing                                                     |                  |                        |
| GO:0016072      | 2.35033860474211e-11                                                | 9.28356345475911 | 2.3901460106567 18     |
| 110             | rRNA metabolic process                                              |                  |                        |
| GO:0034470      | 7.51183818045965e-08                                                | 4.9660829665699  | 4.34572001937582 19    |
| 200             | ncRNA processing                                                    |                  |                        |
| GO:0042273      | 8.30654399015847e-08                                                | 45.8798701298701 | 0.260743201162549      |
| 6 12            | ribosomal large subunit biogenesis                                  |                  |                        |
| GO:0034660      | 1.12999254286839e-06                                                | 3.76632795532113 | 6.19265102761055       |
| 21 285          | ncRNA metabolic process                                             |                  |                        |
| GO:0000028      | 3.16981716572228e-06                                                | 91.1935483870968 | 0.130371600581275      |
| 4 6             | ribosomal small subunit assembly                                    |                  |                        |
| GO:0030490      | 7.26944534829214e-06                                                | 60.7913978494624 | 0.152100200678154      |
| 4 7             | maturation of SSU-rRNA                                              |                  |                        |
| GO:0042255      | 1.68315364685945e-05                                                | 20.7796410709032 | 0.347657601550066      |
| 5 16            | ribosome assembly                                                   |                  |                        |
| Tissue: Adipose | Subcutaneous=>Nerve_Tibial                                          | Type: asymmetric |                        |
| SourceGene:     | PLN(ENSG00000198523.5)                                              |                  |                        |
| TargetGeneSet:  | RPL22 RPL11 RPS8 RPL5 GAS5 RPL31 RPL37A RPL32                       |                  |                        |
| RPL14 RP11      | RPS10 RPL10A MRPS12 RPS20 RPL30 RPS6 RPL12 RPL7A                    |                  |                        |
| PCBD1 OR52V1P   | RPL27A RPS3 RPS25 RPL41 RPL6 RPL7AP6 RPS15A RPL26                   |                  |                        |
| RPL23A ACACA    | RPL17 RPL19 RSL24D1P11 RPL36 PTGER1 UBA52 HPN                       |                  |                        |
| RPL28 SNORD17   | PTTG1IP RPL10                                                       |                  |                        |
| GOBPID          | Pvalue OddsRatio ExpCount Count Size Term                           |                  |                        |
| GO:0006415      | 8.26332302859534e-60                                                | 959.071428571429 | 0.226697114386548      |
| 29 91           | translational termination                                           |                  |                        |
| GO:0006414      | 1.09589056363541e-57                                                | 781.637218045113 | 0.26157359352294       |
| 29 105          | translational elongation                                            |                  |                        |
| GO:0006614      | 1.09589056363541e-57                                                | 781.637218045113 | 0.26157359352294       |
| 29 105          | SRP-dependent cotranslational protein targeting to membrane         |                  |                        |
| GO:0006613      | 1.5079171340912e-57                                                 | 771.432282003711 | 0.26406477060411       |
| 29 106          | cotranslational protein targeting to membrane                       |                  |                        |
| GO:0045047      | 1.5079171340912e-57                                                 | 771.432282003711 | 0.26406477060411       |
| 29 106          | protein targeting to ER                                             |                  |                        |
| GO:0072599      | 1.5079171340912e-57                                                 | 771.432282003711 | 0.26406477060411       |
| 29 106          | establishment of protein localization to endoplasmic reticulum      |                  |                        |
| GO:0070972      | 5.38909278232418e-56                                                | 666.860353130016 | 0.293958895578161      |
| 29 118          | protein localization to endoplasmic reticulum                       |                  |                        |
| GO:0000184      | 7.12221505251468e-56                                                | 659.404761904762 | 0.296450072659332      |
| 29 119          | nuclear-transcribed mRNA catabolic process, nonsense-mediated decay |                  |                        |
| GO:0019080      | 3.25185068166945e-55                                                | 590.661157024793 | 0.376167739256799      |
| 30 151          | viral genome expression                                             |                  |                        |
| GO:0019083      | 3.25185068166945e-55                                                | 590.661157024793 | 0.376167739256799      |
| 30 151          | viral transcription                                                 |                  |                        |
| GO:0006413      | 2.0175966932126e-52                                                 | 481.379790940767 | 0.37865891633797       |
| 29 152          | translational initiation                                            |                  |                        |
| GO:0006612      | 2.4882763124305e-52                                                 | 477.464285714286 | 0.381150093419141      |
| 29 153          | protein targeting to membrane                                       |                  |                        |
| GO:0043624      | 2.4882763124305e-52                                                 | 477.464285714286 | 0.381150093419141      |

Stable4\_20PerPair

|                                            |         |                                                                     |                  |                    |        |                   |                    |              |        |
|--------------------------------------------|---------|---------------------------------------------------------------------|------------------|--------------------|--------|-------------------|--------------------|--------------|--------|
| 29                                         | 153     | cellular protein complex disassembly                                |                  |                    |        |                   |                    |              |        |
| GO:0043241                                 |         | 6.94257702394279e-52                                                | 458.797342192691 |                    |        |                   | 0.393605978824995  |              |        |
| 29                                         | 158     | protein complex disassembly                                         |                  |                    |        |                   |                    |              |        |
| GO:0000956                                 |         | 5.87884912504229e-51                                                | 422.423469387755 |                    |        |                   | 0.421008926717874  |              |        |
| 29                                         | 169     | nuclear-transcribed mRNA catabolic process                          |                  |                    |        |                   |                    |              |        |
| GO:0034623                                 |         | 1.47658466677695e-50                                                | 407.714285714286 |                    |        |                   | 0.433464812123728  |              |        |
| 29                                         | 174     | cellular macromolecular complex disassembly                         |                  |                    |        |                   |                    |              |        |
| GO:0006402                                 |         | 3.02176630964737e-50                                                | 396.657718120805 |                    |        |                   | 0.443429520448412  |              |        |
| 29                                         | 178     | mRNA catabolic process                                              |                  |                    |        |                   |                    |              |        |
| GO:0032984                                 |         | 3.60426562279457e-50                                                | 393.985714285714 |                    |        |                   | 0.445920697529583  |              |        |
| 29                                         | 179     | macromolecular complex disassembly                                  |                  |                    |        |                   |                    |              |        |
| GO:0019058                                 |         | 3.33891897263147e-49                                                | 353.582089552239 |                    |        |                   | 0.575461905750467  |              |        |
| 30                                         | 231     | viral infectious cycle                                              |                  |                    |        |                   |                    |              |        |
| GO:0072594                                 |         | 2.15021886130407e-48                                                | 337.110204081633 |                    |        |                   | 0.508200124558854  |              |        |
| 29                                         | 204     | establishment of protein localization to organelle                  |                  |                    |        |                   |                    |              |        |
| GO:0006401                                 |         | 2.50332734036146e-48                                                | 335.171266233766 |                    |        |                   | 0.510691301640025  |              |        |
| 29                                         | 205     | RNA catabolic process                                               |                  |                    |        |                   |                    |              |        |
| GO:0022415                                 |         | 1.44074904466958e-47                                                | 308.369565217391 |                    |        |                   | 0.647706041104422  |              |        |
| 30                                         | 260     | viral reproductive process                                          |                  |                    |        |                   |                    |              |        |
| GO:0071845                                 |         | 2.34920545731904e-46                                                | 278.759842519685 |                    |        |                   | 0.707494291052522  |              |        |
| 30                                         | 284     | cellular component disassembly at cellular level                    |                  |                    |        |                   |                    |              |        |
| GO:0022411                                 |         | 3.6505774531439e-46                                                 | 274.360465116279 |                    |        |                   | 0.717458999377206  |              |        |
| 30                                         | 288     | cellular component disassembly                                      |                  |                    |        |                   |                    |              |        |
| GO:0016032                                 |         | 4.24588308651024e-40                                                | 166.199524940618 |                    |        |                   | 1.12352086360805   |              |        |
| 30                                         | 451     | viral reproduction                                                  |                  |                    |        |                   |                    |              |        |
| GO:0033365                                 |         | 1.84034379124319e-39                                                | 157.697516930023 |                    |        |                   | 1.17832675939381   |              |        |
| 30                                         | 473     | protein localization to organelle                                   |                  |                    |        |                   |                    |              |        |
| GO:0006605                                 |         | 1.96387618168055e-39                                                | 157.331081081081 |                    |        |                   | 1.18081793647498   |              |        |
| 30                                         | 474     | protein targeting                                                   |                  |                    |        |                   |                    |              |        |
| GO:0042254                                 |         | 2.5066330389749e-09                                                 | 28.9240121580547 |                    |        |                   | 0.371185385094457  |              |        |
| 8                                          | 149     | ribosome biogenesis                                                 |                  |                    |        |                   |                    |              |        |
| GO:0022613                                 |         | 2.99435719193124e-09                                                | 21.912037037037  | 0.560514843263442  |        |                   |                    | 9            |        |
| 225                                        |         | ribonucleoprotein complex biogenesis                                |                  |                    |        |                   |                    |              |        |
| GO:0071843                                 |         | 5.0824334643201e-09                                                 | 20.5579710144928 |                    |        |                   | 0.595391322399834  |              |        |
| 9                                          | 239     | cellular component biogenesis at cellular level                     |                  |                    |        |                   |                    |              |        |
| GO:0042273                                 |         | 1.5826893613868e-08                                                 | 225.109375       | 0.0298941249740502 |        |                   |                    | 4            |        |
| 12                                         |         | ribosomal large subunit biogenesis                                  |                  |                    |        |                   |                    |              |        |
| GO:0006364                                 |         | 1.96388879581855e-07                                                | 29.2183673469388 |                    |        |                   | 0.259082416441769  |              |        |
| 6                                          | 104     | rRNA processing                                                     |                  |                    |        |                   |                    |              |        |
| GO:0016072                                 |         | 2.74257268012292e-07                                                | 27.5211538461538 |                    |        |                   | 0.274029478928794  |              |        |
| 6                                          | 110     | rRNA metabolic process                                              |                  |                    |        |                   |                    |              |        |
| GO:0034470                                 |         | 8.98402702968043e-06                                                | 14.660824742268  | 0.498235416234171  |        |                   |                    | 6            |        |
| 200                                        |         | ncRNA processing                                                    |                  |                    |        |                   |                    |              |        |
| GO:0042274                                 |         | 1.12920216089308e-05                                                | 87.2727272727273 |                    |        |                   | 0.0448411874610754 |              |        |
| 3                                          | 18      | ribosomal small subunit biogenesis                                  |                  |                    |        |                   |                    |              |        |
| Tissue: Adipose_Subcutaneous=>Nerve_Tibial |         | Type: asymmetric                                                    |                  |                    |        |                   |                    |              |        |
| SourceGene: RABGAP1(ENSG00000011454.11)    |         |                                                                     |                  |                    |        |                   |                    |              |        |
| TargetGeneSet:                             |         | FUCA1                                                               | KPNA7            | TMEM234            | RPS8   | RPL5              | RP11               | RPS27        | ADCK3  |
| FAM179A                                    | RPLP0P6 | IGKV4-1                                                             | HNRNPA3          | SLC40A1            | ZNF197 | IMPDH2            | RPL29              | PRICKLE2-AS2 | CNBP   |
| KLF3                                       | CWC27   | COL4A3BP                                                            |                  | EPB41L4A-AS1       |        | CAMLG             | RPL15P3            | NKAPL        | MICB   |
| RPS10                                      | RPL10A  | TRIM73                                                              | CALU             | EPHA1              | EIF3E  | RPL12             | RPL7A              | FUT7         | FBXL15 |
| EIF3M                                      | C1QTNF4 | MMP8                                                                | IL10RA           | RPL18AP3           |        | C12orf47          |                    | RPL6         | RPLP0  |
| ATP8A2                                     | ABHD12B | BMF                                                                 | STRC             | STRCP1             | CHD2   | NME3              | IGFALS             | RPS2         | RPL13  |
| RPL17P43                                   |         | RPL19                                                               | GPX4             | RPL36              | FUT3   | ZNF562            | CTD                | SLC1A6       | HPN    |
| RPL18                                      | RPL13A  | RPS5                                                                | DBNDD2           | RPL12P4            | NPEPL1 | LINC00316         |                    | PIK3IP1      | CELSR1 |
| TRABD                                      | IGBP1   | TTC3P1                                                              | RPL10            |                    |        |                   |                    |              |        |
| GOBPID                                     | Pvalue  | OddsRatio                                                           | ExpCount         | Count              | Size   | Term              |                    |              |        |
| GO:0006414                                 |         | 3.1405522127058e-27                                                 | 81.0474060822898 |                    |        | 0.421424122898069 |                    |              |        |
| 19                                         | 105     | translational elongation                                            |                  |                    |        |                   |                    |              |        |
| GO:0006415                                 |         | 1.50229988544227e-26                                                | 88.2739726027397 |                    |        | 0.365234239844993 |                    |              |        |
| 18                                         | 91      | translational termination                                           |                  |                    |        |                   |                    |              |        |
| GO:0000184                                 |         | 4.05336502099694e-26                                                | 69.6325641025641 |                    |        | 0.477614005951145 |                    |              |        |
| 19                                         | 119     | nuclear-transcribed mRNA catabolic process, nonsense-mediated decay |                  |                    |        |                   |                    |              |        |

Stable4\_20PerPair

|            |                      |                                                                |                    |
|------------|----------------------|----------------------------------------------------------------|--------------------|
| GO:0006413 | 9.97556369848819e-26 | 56.8620414673046                                               | 0.610061587433396  |
| 20         | 152                  | translational initiation                                       |                    |
| GO:0006614 | 2.45585809260828e-25 | 73.9965517241379                                               | 0.421424122898069  |
| 18         | 105                  | SRP-dependent cotranslational protein targeting to membrane    |                    |
| GO:0006613 | 2.95038613061024e-25 | 73.1505681818182                                               | 0.425437685973289  |
| 18         | 106                  | cotranslational protein targeting to membrane                  |                    |
| GO:0045047 | 2.95038613061024e-25 | 73.1505681818182                                               | 0.425437685973289  |
| 18         | 106                  | protein targeting to ER                                        |                    |
| GO:0072599 | 2.95038613061024e-25 | 73.1505681818182                                               | 0.425437685973289  |
| 18         | 106                  | establishment of protein localization to endoplasmic reticulum |                    |
| GO:0070972 | 2.3215428004227e-24  | 64.3185 0.473600442875926                                      | 18 118             |
|            |                      | protein localization to endoplasmic reticulum                  |                    |
| GO:0019080 | 4.8191242550693e-24  | 52.6338383838384                                               | 0.606048024358176  |
| 19         | 151                  | viral genome expression                                        |                    |
| GO:0019083 | 4.8191242550693e-24  | 52.6338383838384                                               | 0.606048024358176  |
| 19         | 151                  | viral transcription                                            |                    |
| GO:0000956 | 4.45463458394984e-23 | 46.2593162393162                                               | 0.678292159712131  |
| 19         | 169                  | nuclear-transcribed mRNA catabolic process                     |                    |
| GO:0006402 | 1.2323725263997e-22  | 43.6132881793259                                               | 0.714414227389108  |
| 19         | 178                  | mRNA catabolic process                                         |                    |
| GO:0006612 | 3.14379795856105e-22 | 47.5266666666667                                               | 0.614075150508615  |
| 18         | 153                  | protein targeting to membrane                                  |                    |
| GO:0043624 | 3.14379795856105e-22 | 47.5266666666667                                               | 0.614075150508615  |
| 18         | 153                  | cellular protein complex disassembly                           |                    |
| GO:0043241 | 5.72732878705262e-22 | 45.8132142857143                                               | 0.634142965884714  |
| 18         | 158                  | protein complex disassembly                                    |                    |
| GO:0006401 | 1.92495522665908e-21 | 37.2116073890267                                               | 0.82278043042004   |
| 19         | 205                  | RNA catabolic process                                          |                    |
| GO:0034623 | 3.42937945510513e-21 | 41.0682692307692                                               | 0.698359975088229  |
| 18         | 174                  | cellular macromolecular complex disassembly                    |                    |
| GO:0032984 | 5.78563282670552e-21 | 39.7788819875776                                               | 0.718427790464328  |
| 18         | 179                  | macromolecular complex disassembly                             |                    |
| GO:0019058 | 1.92132847039728e-20 | 32.5881712626996                                               | 0.927133070375753  |
| 19         | 231                  | viral infectious cycle                                         |                    |
| GO:0071845 | 3.57280565206865e-20 | 28.1678628389155                                               | 1.1398519133624 20 |
| 284        |                      | cellular component disassembly at cellular level               |                    |
| GO:0022411 | 4.72376399290811e-20 | 27.7395915161037                                               | 1.15590616566328   |
| 20         | 288                  | cellular component disassembly                                 |                    |
| GO:0072594 | 6.36775219951183e-20 | 34.3717741935484                                               | 0.81876686734482   |
| 18         | 204                  | establishment of protein localization to organelle             |                    |
| GO:0022415 | 1.83835167582575e-19 | 28.6081498031706                                               | 1.04352639955712   |
| 19         | 260                  | viral reproductive process                                     |                    |
| GO:0016032 | 3.13296268580322e-16 | 17.0497008181707                                               | 1.81011694692409   |
| 20         | 451                  | viral reproduction                                             |                    |
| GO:0033365 | 1.23904310938058e-14 | 14.9576979554953                                               | 1.89841533457892   |
| 19         | 473                  | protein localization to organelle                              |                    |
| GO:0006605 | 1.28737847597981e-14 | 14.923753169907 1.90242889765414                               | 19                 |

474 protein targeting

Tissue: Nerve\_Tibial=>Adipose\_Subcutaneous Type: asymmetric

SourceGene: RP11-340F14.5(ENSG00000261827.1)

|                |           |          |         |         |         |              |          |         |          |
|----------------|-----------|----------|---------|---------|---------|--------------|----------|---------|----------|
| TargetGeneSet: | C1orf174  | MFAP2    | RPL11   | SYF2    | TMEM222 | RP4          | TRAPPC3  |         |          |
| C1orf109       | RRAGC     | CCDC24   | USP1    | GTF2B   | RP11    | GOLPH3L      | CTSO     | UFC1    | NENF     |
| DDIT3          | MPHOSPH10 | RPL31    | LIMS2   | UBE2E3  | RPL32   | EIF1B        | RPL14    | SS18L2  |          |
| RPL24          | CDV3      | ACPL2    | RNF7    | COMMD2  | RPL22L1 | SEN2         | RPL35A   | SLBP    | CNO      |
| LAMTOR3        | SLC9B2    | RPL34    | CNGB1   | DCTD    | BTF3    | EPB41L4A-AS1 | CTD      | HINT1   |          |
| UBE2D2         | CCNG1     | NUDCD2   | NPM1    | BOD1    | RNF130  | GABBR1       | LYPLA2P1 | RPL39P3 |          |
| RAB32          | TNRC18    | TMEM60   | DMTF1   | C7orf23 | TRIM4   | RB1CC1       | RPS20    | NSMAF   | SNHG6    |
| RPL30          | RNF139    | TOMM5    | ALG2    | SURF2   | FAM107B | VPS26A       | RPL13AP5 | FAM204A |          |
| RPS13          | EIF3M     | C11orf55 | RASGRP2 | BRMS1   | ANKRD49 | CWC15        | RPS25    | RPUSD4  |          |
| PCBP2          | GTSF1     | PA2G4    | NACA    | CDK4    | CCDC59  | METAP2       | ALKBH2   | PPP1CC  | SLC15A4  |
| POLR1D         | WBP4      | TPT1     | MED4    | NGDN    | RPS29   | CGRRF1       | TIMM9    | MED6    | PSEN1    |
| IGHV3-49       |           | RSL24D1  | PYGO1   | USP3    | SEC11A  | ARHGDI1      | PDIA2    | METTL9  |          |
| LCMT1          | AQP8      | DNAJA2   | CRNDE   | CMTM3   | NOB1    | ZDHHC7       | CTNS     | TMEM220 | C17orf79 |

Stable4\_20PerPair

| TMEM98     | ZNHIT3                                     | RPL17                | RPL19                                                               | DNAJC7           | PTRH2            | MYO15B            | SPIRE1  | SLC39A6 | KDSR   |
|------------|--------------------------------------------|----------------------|---------------------------------------------------------------------|------------------|------------------|-------------------|---------|---------|--------|
| TMED1      | URI1                                       | RPS16                | ZNF230                                                              | DMWD             | TRPM4            | RPS11             | CCDC106 | CHMP4B  | EIF2S2 |
| RNF114     | RPS21                                      | MIS18A               | DSCR3                                                               | PSMG1            | U2AF1            | CCDC117           | TOM1    | ST13    | PHF5A  |
| GOBPID     | Pvalue                                     | OddsRatio            | ExpCount                                                            | Count            | Size             | Term              |         |         |        |
| GO:0070972 |                                            | 1.40030546437951e-19 |                                                                     | 27.043504350435  | 0.979862         | 2985260536        |         |         | 19     |
| 118        | protein                                    |                      | localization to endoplasmic reticulum                               |                  |                  |                   |         |         |        |
| GO:0006614 |                                            | 4.15334989408457e-19 |                                                                     | 28.8924949290061 |                  | 0.871911978409799 |         |         |        |
| 18         | 105                                        |                      | SRP-dependent cotranslational protein targeting to membrane         |                  |                  |                   |         |         |        |
| GO:0006613 |                                            | 4.96926750983946e-19 |                                                                     | 28.5621657754011 |                  | 0.880215902013701 |         |         |        |
| 18         | 106                                        |                      | cotranslational protein targeting to membrane                       |                  |                  |                   |         |         |        |
| GO:0045047 |                                            | 4.96926750983946e-19 |                                                                     | 28.5621657754011 |                  | 0.880215902013701 |         |         |        |
| 18         | 106                                        |                      | protein targeting to ER                                             |                  |                  |                   |         |         |        |
| GO:0072599 |                                            | 4.96926750983946e-19 |                                                                     | 28.5621657754011 |                  | 0.880215902013701 |         |         |        |
| 18         | 106                                        |                      | establishment of protein localization to endoplasmic reticulum      |                  |                  |                   |         |         |        |
| GO:0006415 |                                            | 9.08105050190388e-19 |                                                                     | 31.7986092889006 |                  | 0.755657047955159 |         |         |        |
| 17         | 91                                         |                      | translational termination                                           |                  |                  |                   |         |         |        |
| GO:0006413 |                                            | 9.23301399557737e-19 |                                                                     | 21.5136363636364 |                  | 1.26219638779323  |         |         |        |
| 20         | 152                                        |                      | translational initiation                                            |                  |                  |                   |         |         |        |
| GO:0006414 |                                            | 1.17795622861272e-17 |                                                                     | 26.7134819064431 |                  | 0.871911978409799 |         |         |        |
| 17         | 105                                        |                      | translational elongation                                            |                  |                  |                   |         |         |        |
| GO:0006612 |                                            | 2.22075526967663e-17 |                                                                     | 19.9307669572927 |                  | 1.27050031139714  |         |         |        |
| 19         | 153                                        |                      | protein targeting to membrane                                       |                  |                  |                   |         |         |        |
| GO:0000184 |                                            | 1.06524052959813e-16 |                                                                     | 23.0242718446602 |                  | 0.988166908864438 |         |         |        |
| 17         | 119                                        |                      | nuclear-transcribed mRNA catabolic process, nonsense-mediated decay |                  |                  |                   |         |         |        |
| GO:0072594 |                                            | 3.31139938655963e-16 |                                                                     | 15.3771739130435 |                  | 1.69400041519618  |         |         |        |
| 20         | 204                                        |                      | establishment of protein localization to organelle                  |                  |                  |                   |         |         |        |
| GO:0019080 |                                            | 6.39840647836301e-15 |                                                                     | 17.4865236922185 |                  | 1.25389246418933  |         |         |        |
| 17         | 151                                        |                      | viral genome expression                                             |                  |                  |                   |         |         |        |
| GO:0019083 |                                            | 6.39840647836301e-15 |                                                                     | 17.4865236922185 |                  | 1.25389246418933  |         |         |        |
| 17         | 151                                        |                      | viral transcription                                                 |                  |                  |                   |         |         |        |
| GO:0043624 |                                            | 7.99513633158207e-15 |                                                                     | 17.2269417475728 |                  | 1.27050031139714  |         |         |        |
| 17         | 153                                        |                      | cellular protein complex disassembly                                |                  |                  |                   |         |         |        |
| GO:0043241 |                                            | 1.37602109238743e-14 |                                                                     | 16.6102045032018 |                  | 1.31201992941665  |         |         |        |
| 17         | 158                                        |                      | protein complex disassembly                                         |                  |                  |                   |         |         |        |
| GO:0000956 |                                            | 4.25718658347756e-14 |                                                                     | 15.39620592744   | 1.40336308905958 |                   |         | 17      |        |
| 169        | nuclear-transcribed mRNA catabolic process |                      |                                                                     |                  |                  |                   |         |         |        |
| GO:0034623 |                                            | 6.92373527797761e-14 |                                                                     | 14.9006245748562 |                  | 1.44488270707909  |         |         |        |
| 17         | 174                                        |                      | cellular macromolecular complex disassembly                         |                  |                  |                   |         |         |        |
| GO:0006402 |                                            | 1.01031256913254e-13 |                                                                     | 14.5263221371284 |                  | 1.47809840149471  |         |         |        |
| 17         | 178                                        |                      | mRNA catabolic process                                              |                  |                  |                   |         |         |        |
| GO:0032984 |                                            | 1.10875682814447e-13 |                                                                     | 14.43563466379   | 1.48640232509861 |                   |         | 17      |        |
| 179        | macromolecular complex disassembly         |                      |                                                                     |                  |                  |                   |         |         |        |
| GO:0006401 |                                            | 1.03190226806756e-12 |                                                                     | 12.416391241479  | 1.70230433880008 |                   |         | 17      |        |
| 205        | RNA catabolic process                      |                      |                                                                     |                  |                  |                   |         |         |        |
| GO:0019058 |                                            | 7.11829907585459e-12 |                                                                     | 10.8878050993558 |                  | 1.91820635250156  |         |         |        |
| 17         | 231                                        |                      | viral infectious cycle                                              |                  |                  |                   |         |         |        |
| GO:0033365 |                                            | 4.25565290545712e-11 |                                                                     | 6.90890990542558 |                  | 3.92775586464605  |         |         |        |
| 22         | 473                                        |                      | protein localization to organelle                                   |                  |                  |                   |         |         |        |
| GO:0022415 |                                            | 4.67072579848617e-11 |                                                                     | 9.5687402612969  | 2.15902013701474 |                   |         | 17      |        |
| 260        | viral reproductive process                 |                      |                                                                     |                  |                  |                   |         |         |        |
| GO:0071845 |                                            | 1.86212395100869e-10 |                                                                     | 8.69379295298353 |                  | 2.35831430350841  |         |         |        |
| 17         | 284                                        |                      | cellular component disassembly at cellular level                    |                  |                  |                   |         |         |        |
| GO:0022411 |                                            | 2.31415006818054e-10 |                                                                     | 8.56303514491456 |                  | 2.39152999792402  |         |         |        |
| 17         | 288                                        |                      | cellular component disassembly                                      |                  |                  |                   |         |         |        |
| GO:0006605 |                                            | 1.97555401668506e-09 |                                                                     | 6.11321585903084 |                  | 3.93605978824995  |         |         |        |
| 20         | 474                                        |                      | protein targeting                                                   |                  |                  |                   |         |         |        |
| GO:0016032 |                                            | 3.25677854497197e-08 |                                                                     | 5.66417606303491 |                  | 3.74506954536018  |         |         |        |
| 18         | 451                                        |                      | viral reproduction                                                  |                  |                  |                   |         |         |        |
| GO:0042254 |                                            | 4.41946260253503e-07 |                                                                     | 9.28188358404186 |                  | 1.23728461698152  |         |         |        |
| 10         | 149                                        |                      | ribosome biogenesis                                                 |                  |                  |                   |         |         |        |
| GO:0022613 |                                            | 2.67646245926574e-06 |                                                                     | 6.65724942124668 |                  | 1.86838281087814  |         |         |        |
| 11         | 225                                        |                      | ribonucleoprotein complex biogenesis                                |                  |                  |                   |         |         |        |
| GO:0071843 |                                            | 4.78680650115741e-06 |                                                                     | 6.24227426364075 |                  | 1.98463774133278  |         |         |        |

Stable4\_20PerPair

| GOBPID                                                         | Pvalue | OddsRatio                                                           | ExpCount         | Count             | Size | Term              |
|----------------------------------------------------------------|--------|---------------------------------------------------------------------|------------------|-------------------|------|-------------------|
| 11                                                             | 239    | cellular component biogenesis at cellular level                     |                  |                   |      |                   |
| Tissue: Nerve_Tibial=>Adipose_Subcutaneous                     |        | Type: asymmetric                                                    |                  |                   |      |                   |
| SourceGene: RP11-516A11.1(ENSG00000228328.2)                   |        |                                                                     |                  |                   |      |                   |
| TargetGeneSet: ARID1A RPS8 Clorf68 RPL29 RPL34 RPS3A AFF4 RP11 |        |                                                                     |                  |                   |      |                   |
| LY6G6E FAM135A RPS6 TPT1 RPS3AP6 RPL4 IRF8 RPL13 RPL27 GLTSCR2 |        |                                                                     |                  |                   |      |                   |
| STK35 RPL39                                                    |        |                                                                     |                  |                   |      |                   |
| GO:0006415                                                     | 9      | 1.14499153212428e-16                                                | 225.047038327526 |                   |      | 0.100754273060688 |
|                                                                | 91     | translational termination                                           |                  |                   |      |                   |
| GO:0034623                                                     | 10     | 3.71475798518804e-16                                                | 145.030487804878 |                   |      | 0.192651027610546 |
|                                                                | 174    | cellular macromolecular complex disassembly                         |                  |                   |      |                   |
| GO:0006414                                                     | 9      | 4.36314244552865e-16                                                | 192.040178571429 |                   |      | 0.11625493045464  |
|                                                                | 105    | translational elongation                                            |                  |                   |      |                   |
| GO:0006614                                                     | 9      | 4.36314244552865e-16                                                | 192.040178571429 |                   |      | 0.11625493045464  |
|                                                                | 105    | SRP-dependent cotranslational protein targeting to membrane         |                  |                   |      |                   |
| GO:0006613                                                     | 9      | 4.76587842681298e-16                                                | 190.047128129602 |                   |      | 0.117362120268494 |
|                                                                | 106    | cotranslational protein targeting to membrane                       |                  |                   |      |                   |
| GO:0045047                                                     | 9      | 4.76587842681298e-16                                                | 190.047128129602 |                   |      | 0.117362120268494 |
|                                                                | 106    | protein targeting to ER                                             |                  |                   |      |                   |
| GO:0072599                                                     | 9      | 4.76587842681298e-16                                                | 190.047128129602 |                   |      | 0.117362120268494 |
|                                                                | 106    | establishment of protein localization to endoplasmic reticulum      |                  |                   |      |                   |
| GO:0032984                                                     | 179    | 4.95900343977751e-16                                                | 140.69033530572  | 0.198186976679815 | 10   |                   |
|                                                                | 179    | macromolecular complex disassembly                                  |                  |                   |      |                   |
| GO:0070972                                                     | 9      | 1.29076584023977e-15                                                | 168.982961992136 |                   |      | 0.130648398034738 |
|                                                                | 118    | protein localization to endoplasmic reticulum                       |                  |                   |      |                   |
| GO:0000184                                                     | 9      | 1.39576090835934e-15                                                | 167.435064935065 |                   |      | 0.131755587848592 |
|                                                                | 119    | nuclear-transcribed mRNA catabolic process, nonsense-mediated decay |                  |                   |      |                   |
| GO:0019080                                                     | 9      | 1.25504809296364e-14                                                | 129.413480885312 |                   |      | 0.167185661891911 |
|                                                                | 151    | viral genome expression                                             |                  |                   |      |                   |
| GO:0019083                                                     | 9      | 1.25504809296364e-14                                                | 129.413480885312 |                   |      | 0.167185661891911 |
|                                                                | 151    | viral transcription                                                 |                  |                   |      |                   |
| GO:0006413                                                     | 152    | 1.33345031607535e-14                                                | 128.4995004995   | 0.168292851705764 | 9    |                   |
|                                                                | 152    | translational initiation                                            |                  |                   |      |                   |
| GO:0006612                                                     | 9      | 1.4161677045545e-14                                                 | 127.598214285714 |                   |      | 0.169400041519618 |
|                                                                | 153    | protein targeting to membrane                                       |                  |                   |      |                   |
| GO:0043624                                                     | 9      | 1.4161677045545e-14                                                 | 127.598214285714 |                   |      | 0.169400041519618 |
|                                                                | 153    | cellular protein complex disassembly                                |                  |                   |      |                   |
| GO:0043241                                                     | 9      | 1.9019830452476e-14                                                 | 123.273250239693 |                   |      | 0.174935990588887 |
|                                                                | 158    | protein complex disassembly                                         |                  |                   |      |                   |
| GO:0000956                                                     | 9      | 3.52243611240938e-14                                                | 114.709821428571 |                   |      | 0.187115078541277 |
|                                                                | 169    | nuclear-transcribed mRNA catabolic process                          |                  |                   |      |                   |
| GO:0071845                                                     | 10     | 5.29855399750741e-14                                                | 86.1374695863747 |                   |      | 0.314441907134454 |
|                                                                | 284    | cellular component disassembly at cellular level                    |                  |                   |      |                   |
| GO:0006402                                                     | 9      | 5.65922752959147e-14                                                | 108.532544378698 |                   |      | 0.197079786865961 |
|                                                                | 178    | mRNA catabolic process                                              |                  |                   |      |                   |
| GO:0022411                                                     | 10     | 6.09830219220966e-14                                                | 84.8741007194245 |                   |      | 0.318870666389869 |
|                                                                | 288    | cellular component disassembly                                      |                  |                   |      |                   |
| GO:0072594                                                     | 9      | 1.95978694839734e-13                                                | 93.8901098901099 |                   |      | 0.225866722026157 |
|                                                                | 204    | establishment of protein localization to organelle                  |                  |                   |      |                   |
| GO:0006401                                                     | 9      | 2.04887268316851e-13                                                | 93.4045189504373 |                   |      | 0.226973911840011 |
|                                                                | 205    | RNA catabolic process                                               |                  |                   |      |                   |
| GO:0019058                                                     | 9      | 6.05431774037828e-13                                                | 82.3146718146718 |                   |      | 0.255760847000208 |
|                                                                | 231    | viral infectious cycle                                              |                  |                   |      |                   |
| GO:0022415                                                     | 9      | 1.76390039952359e-12                                                | 72.6556630620376 |                   |      | 0.287869351601965 |
|                                                                | 260    | viral reproductive process                                          |                  |                   |      |                   |
| GO:0016032                                                     | 9      | 2.44498073565706e-10                                                | 40.7036199095023 |                   |      | 0.499342606048024 |
|                                                                | 451    | viral reproduction                                                  |                  |                   |      |                   |
| GO:0033365                                                     | 9      | 3.73067412356996e-10                                                | 38.7127463054187 |                   |      | 0.523700781952806 |
|                                                                | 473    | protein localization to organelle                                   |                  |                   |      |                   |
| GO:0006605                                                     | 9      | 3.80117561337389e-10                                                | 38.6267281105991 |                   |      | 0.52480797176666  |
|                                                                | 474    | protein targeting                                                   |                  |                   |      |                   |
| Tissue: Nerve_Tibial=>Adipose_Subcutaneous                     |        | Type: asymmetric                                                    |                  |                   |      |                   |
| SourceGene: RP4-792G4.2(ENSG00000230798.1)                     |        |                                                                     |                  |                   |      |                   |

Stable4\_20PerPair

| TargetGeneSet: | IGSF21  | RPL11                   | RP4                  | TRAPPC3          | RPS8     | UQCRH                                                               | RPL5              | RP11     |          |
|----------------|---------|-------------------------|----------------------|------------------|----------|---------------------------------------------------------------------|-------------------|----------|----------|
| HBXIP          | MRPS21  | CTSO                    | UFC1                 | CYB5R1           | DDIT3    | UBC                                                                 | IGKV1D-39         | RPL31    |          |
| C2orf49        | MMADHC  | C2orf47                 | RPL37A               | RPL32            | UBE2E1   | EIF1B                                                               | RPL24             | CNBP     | CPB1     |
| C3orf55        | DNAJC19 | RPL35A                  | C4orf52              | ENOPH1           | RPL34    | CICP16                                                              | SGTB              | TAF9     | BTF3     |
| COX7C          | CTD     | SNX2                    | HINT1                | SKP1             | CTB      | RPS14                                                               | ATP6V0E1          |          | CUTA     |
| RPS10          | RPL10A  | RPL39P3                 | MRPS12               | ABCB5            | TMEM60   | DMTF1                                                               | RPL19P12          |          | SRPK2    |
| RPS20          | SNHG6   | RPL30                   | EIF3H                | EEF1D            | RPL8     | RPS6                                                                | NDUFB6            | CHCHD2P9 |          |
| SEC61B         | PSMB7   | RPL35                   | BAMBI                | ZFAND4           | RPS24    | ART5                                                                | RPL27A            | RPS13    | EIF3M    |
| MRPL16         | LAMTOR1 | CLNS1A                  | TMEM126A             |                  | C11orf93 |                                                                     | ATP5L             | RPS25    | C12orf57 |
| CSAD           | PFDN5   | CNPY2                   | NACA                 | C12orf51         | MRP63    |                                                                     | EIF4A1P7          |          | TPT1     |
| COMMD6         | EAPP    | RPS29                   | RPL36A               | RPS3AP6          | RPS27L   | RPLP1                                                               | MORF4L1           | C15orf40 |          |
| RPS15A         | METTL9  | RPL26                   | RPS7P1               | RPL23A           | RPL17    | RPL19                                                               | KRT10             | RPL27    | RPS15    |
| RPL36          | TMED1   | UQCRFS1                 | RPS19                | LYPD3            | SNRPD2   | RPL18                                                               | RPS11             | KLK5     | EIF2S2   |
| RNF114         | DPM1    | RPS21                   | ST13                 | XRCC6            | FUNDC1   | UXT                                                                 | RPS4X             | RPL39    |          |
| GOBPID         | Pvalue  | OddsRatio               | ExpCount             | Count            | Size     | Term                                                                |                   |          |          |
| GO:0006415     | 38      | 91                      | 4.58020427852195e-59 | 146.366576819407 |          | translational termination                                           | 0.680091343159643 |          |          |
| GO:0006414     | 39      | 105                     | 3.38213362304763e-58 | 122.266798418972 |          | translational elongation                                            | 0.784720780568819 |          |          |
| GO:0006614     | 39      | 105                     | 3.38213362304763e-58 | 122.266798418972 |          | SRP-dependent cotranslational protein targeting to membrane         | 0.784720780568819 |          |          |
| GO:0006613     | 39      | 106                     | 5.32575348629716e-58 | 120.433484750162 |          | cotranslational protein targeting to membrane                       | 0.792194311812331 |          |          |
| GO:0045047     | 39      | 106                     | 5.32575348629716e-58 | 120.433484750162 |          | protein targeting to ER                                             | 0.792194311812331 |          |          |
| GO:0072599     | 39      | 106                     | 5.32575348629716e-58 | 120.433484750162 |          | establishment of protein localization to endoplasmic reticulum      | 0.792194311812331 |          |          |
| GO:0006413     | 42      | 152                     | 1.7805400085611e-56  | 82.3396694214876 |          | translational initiation                                            | 1.13597674901391  |          |          |
| GO:0070972     | 39      | 118                     | 8.3862438871158e-56  | 102.053935057788 |          | protein localization to endoplasmic reticulum                       | 0.881876686734482 |          |          |
| GO:0000184     | 38      | 119                     | 1.21871333762456e-53 | 95.5830687830688 |          | nuclear-transcribed mRNA catabolic process, nonsense-mediated decay | 0.889350217977995 |          |          |
| GO:0006612     | 39      | 153                     | 1.07136259207137e-50 | 70.5480549199085 |          | protein targeting to membrane                                       | 1.14345028025742  |          |          |
| GO:0019080     | 151     | viral genome expression | 4.20629708041496e-49 | 68.3615676359039 |          |                                                                     | 1.1285032177704   | 38       |          |
| GO:0019083     | 151     | viral transcription     | 4.20629708041496e-49 | 68.3615676359039 |          |                                                                     | 1.1285032177704   | 38       |          |
| GO:0043624     | 38      | 153                     | 7.39063490526272e-49 | 67.1632298136646 |          | cellular protein complex disassembly                                | 1.14345028025742  |          |          |
| GO:0043241     | 38      | 158                     | 2.91462560720417e-48 | 64.3421428571429 |          | protein complex disassembly                                         | 1.18081793647498  |          |          |
| GO:0000956     | 38      | 169                     | 5.02992104891155e-47 | 58.8937840785169 |          | nuclear-transcribed mRNA catabolic process                          | 1.26302678015362  |          |          |
| GO:0072594     | 40      | 204                     | 5.23455908171374e-47 | 50.8572453371593 |          | establishment of protein localization to organelle                  | 1.52460037367656  |          |          |
| GO:0034623     | 38      | 174                     | 1.7113446454692e-46  | 56.7086134453781 |          | cellular macromolecular complex disassembly                         | 1.30039443637119  |          |          |
| GO:0019058     | 231     | viral infectious cycle  | 2.47949418495197e-46 | 45.5831107619796 |          |                                                                     | 1.7263857172514   | 41       |          |
| GO:0006402     | 38      | 178                     | 4.42817693186929e-46 | 55.0728571428571 |          | mRNA catabolic process                                              | 1.33028856134524  |          |          |
| GO:0032984     | 38      | 179                     | 5.59474172456195e-46 | 54.6784194528875 |          | macromolecular complex disassembly                                  | 1.33776209258875  |          |          |
| GO:0022415     | 41      | 260                     | 4.32279565024158e-44 | 39.4659578818238 |          | viral reproductive process                                          | 1.94311812331327  |          |          |
| GO:0006401     | 38      | 205                     | 1.51876948980354e-43 | 46.0810949529512 |          | RNA catabolic process                                               | 1.53207390492007  |          |          |
| GO:0016032     | 44      | 451                     | 4.45820144890594e-38 | 23.5405405405405 |          | viral reproduction                                                  | 3.37056259082416  |          |          |
| GO:0071845     | 284     |                         | 7.23985373208038e-38 | 31.108362369338  |          | cellular component disassembly at cellular level                    | 2.12248287315757  |          | 38       |



Stable4\_20PerPair

|                                                          |                              |                                                                                          |                                                  |
|----------------------------------------------------------|------------------------------|------------------------------------------------------------------------------------------|--------------------------------------------------|
| GO:0022411                                               | 1.25473837791022e-37         | 30.6019428571429                                                                         | 2.15237699813162                                 |
| 38                                                       | 288                          | cellular component disassembly                                                           |                                                  |
| GO:0033365                                               | 3.4103874100032e-33          | 19.7053275290216                                                                         | 3.53498027818144                                 |
| 41                                                       | 473                          | protein localization to organelle                                                        |                                                  |
| GO:0006605                                               | 3.71587653115593e-33         | 19.6584054324222                                                                         | 3.54245380942495                                 |
| 41                                                       | 474                          | protein targeting                                                                        |                                                  |
| GO:0042274                                               | 3.07610727149457e-13         | 114.664 0.134523562383226                                                                | 8 18                                             |
| ribosomal small subunit biogenesis                       |                              |                                                                                          |                                                  |
| GO:0022613                                               | 1.00265578829395e-11         | 11.7611816101519                                                                         | 1.68154452979033                                 |
| 16                                                       | 225                          | ribonucleoprotein complex biogenesis                                                     |                                                  |
| GO:0071843                                               | 2.49966109415737e-11         | 11.0118931565607                                                                         | 1.7861739671995 16                               |
| 239                                                      | cellular                     | component biogenesis at cellular level                                                   |                                                  |
| GO:0006364                                               | 3.02294246046408e-10         | 17.3761223811107                                                                         | 0.777247249325306                                |
| 11                                                       | 104                          | rRNA processing                                                                          |                                                  |
| GO:0016072                                               | 5.56765771310408e-10         | 16.3161512027491                                                                         | 0.822088436786382                                |
| 11                                                       | 110                          | rRNA metabolic process                                                                   |                                                  |
| GO:0042254                                               | 1.10251701938669e-09         | 12.9616788321168                                                                         | 1.11355615528337                                 |
| 12                                                       | 149                          | ribosome biogenesis                                                                      |                                                  |
| GO:0030490                                               | 1.01492952635634e-07         | 183.846153846154                                                                         | 0.0523147187045879                               |
| 4                                                        | 7                            | maturation of SSU-rRNA                                                                   |                                                  |
| GO:0034660                                               | 2.00803015829786e-07         | 7.07906346749226                                                                         | 2.12995640440108                                 |
| 13                                                       | 285                          | ncRNA metabolic process                                                                  |                                                  |
| GO:0034470                                               | 2.90059233058808e-07         | 8.49255441008018                                                                         | 1.49470624870251                                 |
| 11                                                       | 200                          | ncRNA processing                                                                         |                                                  |
| GO:0042273                                               | 1.39457871039722e-06         | 68.9182692307692                                                                         | 0.0896823749221507                               |
| 4                                                        | 12                           | ribosomal large subunit biogenesis                                                       |                                                  |
| GO:0022618                                               | 6.89193924097439e-06         | 11.2269351935194                                                                         | 0.709985468133693                                |
| 7                                                        | 95                           | ribonucleoprotein complex assembly                                                       |                                                  |
| GO:0000028                                               | 7.98768948879993e-06         | 136.571428571429                                                                         | 0.0448411874610754                               |
| 3                                                        | 6                            | ribosomal small subunit assembly                                                         |                                                  |
| GO:0000462                                               | 7.98768948879993e-06         | 136.571428571429                                                                         | 0.0448411874610754                               |
| 3                                                        | 6                            | maturation of SSU-rRNA from tricistronic rRNA transcript (SSU-rRNA, 5.8S rRNA, LSU-rRNA) |                                                  |
| GO:0071826                                               | 9.68333273999527e-06         | 10.6196103481316                                                                         | 0.747353124351256                                |
| 7                                                        | 100                          | ribonucleoprotein complex subunit organization                                           |                                                  |
| Tissue: Skin_Sun_Exposed_Lower_leg=>Adipose_Subcutaneous |                              |                                                                                          | Type: asymmetric                                 |
| SourceGene:                                              | BACH1-IT1(ENSG00000248476.1) |                                                                                          |                                                  |
| TargetGeneSet:                                           | ATAD3A                       | MRT04                                                                                    | GMEB1 U6 ATXN7L2 WDR3 GPATCH4 COG2               |
| Clorf124                                                 | PPM1G                        | PNO1                                                                                     | POLR1A SNRNP200 POLR1B IWS1 SACM1L               |
| IFRD2                                                    | RRP9                         | STAG1                                                                                    | GFM1 LSG1 FAM193A NOP14 HNRNPD NAA15 NSUN2       |
| UTP15                                                    | HARS                         | TCOF1                                                                                    | MAPK9 RIOK1 BAG6 WDR46 XPO5 SYNCRIP PUS7 RP11    |
| KAT6A                                                    | KIAA2026                     |                                                                                          | BAG1 NOL6 TESK1 CIZ1 ZMYND19 RRP12 CHUK          |
| PPRC1                                                    | NOLC1                        | EIF6                                                                                     | SEC23IP CARS NUP98 SF1 KLC2 DDX10 NOP2           |
| DDX23                                                    | MARS                         | UTP20                                                                                    | ANAPC7 DDX55 PUS1 EP400 TSC22D1 KTN1-AS1         |
| ZNF598                                                   | TRAP1                        | USP7                                                                                     | FBR5 SRCAP SETD1A E2F4 ZC3H18 MYBBP1A DHX33 PEMT |
| UTP6                                                     | TADA2A                       | SEH1L                                                                                    | DNMT1 PDE4A ILF3 TNPO2 CC2D1A ZNF333 CCDC97      |
| TOMM40                                                   | CD3EAP                       | DHX34                                                                                    | GRWD1 ZNF335 DDX27 SCAF4 RRP1B RRP1 PWP2         |
| DEPDC5                                                   | PPP6R2                       | TIMM8A                                                                                   |                                                  |
| GOBPID                                                   | Pvalue                       | OddsRatio                                                                                | ExpCount Count Size Term                         |
| GO:0071843                                               |                              | 5.95310092169323e-15                                                                     | 18.0618618618619 1.27347588402187                |
| 17                                                       | 239                          | cellular component biogenesis at cellular level                                          |                                                  |
| GO:0022613                                               |                              | 4.12246425166107e-14                                                                     | 17.7770805553377 1.19887897031347                |
| 16                                                       | 225                          | ribonucleoprotein complex biogenesis                                                     |                                                  |
| GO:0042254                                               |                              | 9.14114553339902e-13                                                                     | 21.2653952205882 0.793924295896478               |
| 13                                                       | 149                          | ribosome biogenesis                                                                      |                                                  |
| GO:0034660                                               |                              | 1.59772681679339e-12                                                                     | 13.753427996831 1.51858002906373 16              |
| 285                                                      | ncRNA metabolic process      |                                                                                          |                                                  |
| GO:0034470                                               |                              | 3.9079936678959e-11                                                                      | 15.4103442513369 1.0656701958342 13              |
| 200                                                      | ncRNA processing             |                                                                                          |                                                  |
| GO:0006364                                               |                              | 1.76290035351077e-10                                                                     | 22.6738647189584 0.554148501833783               |
| 10                                                       | 104                          | rRNA processing                                                                          |                                                  |
| GO:0016072                                               |                              | 3.08801441221038e-10                                                                     | 21.3044776119403 0.586118607708809               |
| 10                                                       | 110                          | rRNA metabolic process                                                                   |                                                  |

Stable4\_20PerPair

|                                                          |                              |                      |                   |                  |                  |                                                                |                   |          |          |      |
|----------------------------------------------------------|------------------------------|----------------------|-------------------|------------------|------------------|----------------------------------------------------------------|-------------------|----------|----------|------|
| GO:0006473                                               | 5.21450453179506e-06         | 11.7793388429752     | 0.682028925333887 |                  |                  |                                                                |                   |          |          |      |
| 7 128                                                    | protein acetylation          |                      |                   |                  |                  |                                                                |                   |          |          |      |
| GO:0043543                                               | 1.1323242897632e-05          | 10.3919708029197     | 0.767282541000623 |                  |                  |                                                                |                   |          |          |      |
| 7 144                                                    | protein acylation            |                      |                   |                  |                  |                                                                |                   |          |          |      |
| Tissue: Skin_Sun_Exposed_Lower_leg=>Adipose_Subcutaneous |                              |                      | Type: cluster     |                  |                  |                                                                |                   |          |          |      |
| SourceGene:                                              | BACH1-IT1(ENSG00000248476.1) |                      |                   |                  |                  |                                                                |                   |          |          |      |
| TargetGeneSet:                                           | ATAD3A                       | MRT04                | GMEB1             | U6               | ATXN7L2          | WDR3                                                           | GPATCH4           | COG2     |          |      |
| Clorf124                                                 | PPM1G                        | PN01                 | POLR1A            | SNRNP200         |                  | POLR1B                                                         | IWS1              | SACM1L   |          |      |
| IFRD2                                                    | RRP9                         | STAG1                | GFM1              | LSG1             | FAM193A          | NOP14                                                          | HNRNPD            | NAA15    | NSUN2    |      |
| UTP15                                                    | HARS                         | TCOF1                | MAPK9             | RIOK1            | BAG6             | WDR46                                                          | XPO5              | SYNCRIP  | PUS7     | RP11 |
| KAT6A                                                    | KIAA2026                     |                      | BAG1              | NOL6             | TESK1            | CIZ1                                                           | ZMYND19           | RRP12    | CHUK     |      |
| PPRC1                                                    | NOLC1                        | EIF6                 | SEC23IP           | CARS             | NUP98            | SF1                                                            | KLC2              | DDX10    | NOP2     |      |
| DDX23                                                    | MARS                         | UTP20                | ANAPC7            | DDX55            | PUS1             | EP400                                                          | TSC22D1           | KTN1-AS1 |          |      |
| ZNF598                                                   | TRAP1                        | USP7                 | FBRS              | SRCAP            | SETD1A           | E2F4                                                           | ZC3H18            | MYBBP1A  | DHX33    | PEMT |
| UTP6                                                     | TADA2A                       | SEH1L                | DNMT1             | PDE4A            | ILF3             | TNPO2                                                          | CC2D1A            | ZNF333   | CCDC97   |      |
| TOMM40                                                   | CD3EAP                       | DHX34                | GRWD1             | ZNF335           | DDX27            | SCAF4                                                          | RRP1B             | RRP1     | PWP2     |      |
| DEPDC5                                                   | PPP6R2                       | TIMM8A               |                   |                  |                  |                                                                |                   |          |          |      |
| GOBPID                                                   | Pvalue                       | OddsRatio            | ExpCount          | Count            | Size             | Term                                                           |                   |          |          |      |
| GO:0071843                                               | 17 239                       | 5.95310092169323e-15 | 18.0618618618619  | 18.0618618618619 |                  | cellular component biogenesis at cellular level                | 1.27347588402187  |          |          |      |
| GO:0022613                                               | 16 225                       | 4.12246425166107e-14 | 17.7770805553377  | 17.7770805553377 |                  | ribonucleoprotein complex biogenesis                           | 1.19887897031347  |          |          |      |
| GO:0042254                                               | 13 149                       | 9.14114553339902e-13 | 21.2653952205882  | 21.2653952205882 |                  | ribosome biogenesis                                            | 0.793924295896478 |          |          |      |
| GO:0034660                                               | 285                          | 1.59772681679339e-12 | 13.753427996831   | 13.753427996831  | 1.51858002906373 | ncRNA metabolic process                                        | 1.0656701958342   | 13       |          |      |
| GO:0034470                                               | 200                          | 3.9079936678959e-11  | 15.4103442513369  | 15.4103442513369 |                  | ncRNA processing                                               | 1.0656701958342   | 13       |          |      |
| GO:0006364                                               | 10 104                       | 1.76290035351077e-10 | 22.6738647189584  | 22.6738647189584 |                  | rRNA processing                                                | 0.554148501833783 |          |          |      |
| GO:0016072                                               | 10 110                       | 3.08801441221038e-10 | 21.3044776119403  | 21.3044776119403 |                  | rRNA metabolic process                                         | 0.586118607708809 |          |          |      |
| GO:0006473                                               | 7 128                        | 5.21450453179506e-06 | 11.7793388429752  | 11.7793388429752 |                  | protein acetylation                                            | 0.682028925333887 |          |          |      |
| GO:0043543                                               | 7 144                        | 1.1323242897632e-05  | 10.3919708029197  | 10.3919708029197 |                  | protein acylation                                              | 0.767282541000623 |          |          |      |
| Tissue: Skin_Sun_Exposed_Lower_leg=>Adipose_Subcutaneous |                              |                      |                   |                  |                  |                                                                | Type: asymmetric  |          |          |      |
| SourceGene:                                              | CDSN(ENSG00000204539.3)      |                      |                   |                  |                  |                                                                |                   |          |          |      |
| TargetGeneSet:                                           | SLC35E2B                     |                      | RP11              | PLA2G2F          | RP4              | RPL5                                                           | TSHB              | RAB25    |          |      |
| SPATA17                                                  | RHOQ                         | UBC                  | ASPRV1            | TPRKB            | PMS1             | EEF1B2                                                         | RPL29             | SPCS1    | RPL24    |      |
| ZBTB38                                                   | RPL35A                       | NUP54                | RPL34             | OSTC             | FRG1             | CTB                                                            | RPS14             | GPLD1    | HIST1H1B |      |
| RPL10A                                                   | DST                          | SEN6                 | MRPS12            | AIG1             | HOXA5            | NT5C3                                                          | GRB10             | PRKAR2B  | SSBP1    | RPS6 |
| HRCT1                                                    | DAPK1                        | RPL12                | RPL7A             | C9orf104         |                  | ITGB1                                                          | RPL13AP5          |          | BLOC1S2  |      |
| ZBED5                                                    | PDX16                        | POLR2G               | RPS25             | WNT5B            | HNRNPA1          | SNRPF                                                          | RPL18AP3          |          | C12orf45 |      |
| RPL6                                                     | RPLP0                        | ALG5                 | EXOC5             | ZNF280D          | MYO1E            | RPS3AP6                                                        | TIPIN             | RPS2     | LITAF    |      |
| RPL13                                                    | CTD                          | RPL19                | DUSP3             | ANKRD40          | NT5C             | TMEM241                                                        | HNRNPA1P7         |          | PIP5K1C  |      |
| ZNF823                                                   | ZNF44                        | RNASEH2A             |                   | RPS19            | PLA2G4C          | RPL18                                                          | TEAD2             | RPS5     | RPL12P4  |      |
| MRPL39                                                   | RPL3                         | ATXN10               | FOXO4             |                  |                  |                                                                |                   |          |          |      |
| GOBPID                                                   | Pvalue                       | OddsRatio            | ExpCount          | Count            | Size             | Term                                                           |                   |          |          |      |
| GO:0070972                                               | 23 118                       | 4.01447120634584e-31 | 69.1597894736842  | 69.1597894736842 |                  | protein localization to endoplasmic reticulum                  | 0.596083316033493 |          |          |      |
| GO:0006414                                               | 22 105                       | 1.63532109211547e-30 | 74.2948263642807  | 74.2948263642807 |                  | translational elongation                                       | 0.530413120199294 |          |          |      |
| GO:0006614                                               | 22 105                       | 1.63532109211547e-30 | 74.2948263642807  | 74.2948263642807 |                  | SRP-dependent cotranslational protein targeting to membrane    | 0.530413120199294 |          |          |      |
| GO:0006613                                               | 22 106                       | 2.0566077911272e-30  | 73.4052287581699  | 73.4052287581699 |                  | cotranslational protein targeting to membrane                  | 0.535464673725002 |          |          |      |
| GO:0045047                                               | 22 106                       | 2.0566077911272e-30  | 73.4052287581699  | 73.4052287581699 |                  | protein targeting to ER                                        | 0.535464673725002 |          |          |      |
| GO:0072599                                               | 22 106                       | 2.0566077911272e-30  | 73.4052287581699  | 73.4052287581699 |                  | establishment of protein localization to endoplasmic reticulum | 0.535464673725002 |          |          |      |
| GO:0006415                                               | 21 91                        | 4.27946954834511e-30 | 82.5461538461538  | 82.5461538461538 |                  | translational termination                                      | 0.459691370839388 |          |          |      |

Stable4\_20PerPair

|                                                                         |                      |                  |                    |    |     |
|-------------------------------------------------------------------------|----------------------|------------------|--------------------|----|-----|
| GO:0006612                                                              | 2.44265744126145e-28 | 50.416           | 0.772887689433257  | 23 | 153 |
| protein targeting to membrane                                           |                      |                  |                    |    |     |
| GO:0000184                                                              | 2.03494710616023e-27 | 58.8461538461538 | 0.6011348695592    | 21 |     |
| 119 nuclear-transcribed mRNA catabolic process, nonsense-mediated decay |                      |                  |                    |    |     |
| GO:0019080                                                              | 8.8461963931469e-27  | 47.6482748138015 | 0.762784582381842  |    |     |
| 22 151 viral genome expression                                          |                      |                  |                    |    |     |
| GO:0019083                                                              | 8.8461963931469e-27  | 47.6482748138015 | 0.762784582381842  |    |     |
| 22 151 viral transcription                                              |                      |                  |                    |    |     |
| GO:0072594                                                              | 2.41925650647136e-25 | 36.080773480663  | 1.03051691924434   | 23 |     |
| 204 establishment of protein localization to organelle                  |                      |                  |                    |    |     |
| GO:0006413                                                              | 4.75051194318713e-25 | 43.9205813270699 | 0.76783613590755   |    |     |
| 21 152 translational initiation                                         |                      |                  |                    |    |     |
| GO:0043624                                                              | 5.48718732480764e-25 | 43.5847902097902 | 0.772887689433257  |    |     |
| 21 153 cellular protein complex disassembly                             |                      |                  |                    |    |     |
| GO:0043241                                                              | 1.11119910296306e-24 | 41.979365524986  | 0.798145457061795  | 21 |     |
| 158 protein complex disassembly                                         |                      |                  |                    |    |     |
| GO:0000956                                                              | 4.83123073510223e-24 | 38.829261954262  | 0.853712545844578  | 21 |     |
| 169 nuclear-transcribed mRNA catabolic process                          |                      |                  |                    |    |     |
| GO:0034623                                                              | 9.1051683141697e-24  | 37.5471342383107 | 0.878970313473116  |    |     |
| 21 174 cellular macromolecular complex disassembly                      |                      |                  |                    |    |     |
| GO:0006401                                                              | 9.51942795376862e-24 | 33.4608378870674 | 1.03556847277005   |    |     |
| 22 205 RNA catabolic process                                            |                      |                  |                    |    |     |
| GO:0006402                                                              | 1.49043956798558e-23 | 36.5802302792749 | 0.899176527575946  |    |     |
| 21 178 mRNA catabolic process                                           |                      |                  |                    |    |     |
| GO:0032984                                                              | 1.68267352320826e-23 | 36.3461538461538 | 0.904228081101654  |    |     |
| 21 179 macromolecular complex disassembly                               |                      |                  |                    |    |     |
| GO:0019058                                                              | 1.3797664014186e-22  | 29.2445820433437 | 1.16690886443845   |    |     |
| 22 231 viral infectious cycle                                           |                      |                  |                    |    |     |
| GO:0022415                                                              | 1.8967345325648e-21  | 25.6286043829296 | 1.31340391668397   |    |     |
| 22 260 viral reproductive process                                       |                      |                  |                    |    |     |
| GO:0071845                                                              | 3.00383735976349e-19 | 21.6741006142147 | 1.43464120130095   |    |     |
| 21 284 cellular component disassembly at cellular level                 |                      |                  |                    |    |     |
| GO:0022411                                                              | 4.01641446014241e-19 | 21.3433448573898 | 1.45484741540378   |    |     |
| 21 288 cellular component disassembly                                   |                      |                  |                    |    |     |
| GO:0006605                                                              | 3.61892328803731e-18 | 15.1597278911565 | 2.39443637118538   |    |     |
| 24 474 protein targeting                                                |                      |                  |                    |    |     |
| GO:0016032                                                              | 1.80512837404464e-17 | 14.9929906542056 | 2.27825064009411   |    |     |
| 23 451 viral reproduction                                               |                      |                  |                    |    |     |
| GO:0033365                                                              | 5.1442244587579e-17  | 14.2375111111111 | 2.38938481765968   |    |     |
| 23 473 protein localization to organelle                                |                      |                  |                    |    |     |
| GO:0071843                                                              | 2.39667406935383e-09 | 12.2634505669098 | 1.20732129264411   |    |     |
| 12 239 cellular component biogenesis at cellular level                  |                      |                  |                    |    |     |
| GO:0022613                                                              | 1.55708901662507e-08 | 11.7428399155864 | 1.1365995432842    | 11 |     |
| 225 ribonucleoprotein complex biogenesis                                |                      |                  |                    |    |     |
| GO:0042254                                                              | 5.72128400092112e-08 | 14.3015625       | 0.752681475330427  | 9  |     |
| 149 ribosome biogenesis                                                 |                      |                  |                    |    |     |
| GO:0042274                                                              | 1.73804767524059e-06 | 59.4782608695652 | 0.0909279634627361 |    |     |
| 4 18 ribosomal small subunit biogenesis                                 |                      |                  |                    |    |     |
| GO:0000028                                                              | 2.44679800247836e-06 | 205.357142857143 | 0.0303093211542454 |    |     |
| 3 6 ribosomal small subunit assembly                                    |                      |                  |                    |    |     |
| GO:0006364                                                              | 1.38417502241937e-05 | 13.0490405117271 | 0.525361566673587  |    |     |
| 6 104 rRNA processing                                                   |                      |                  |                    |    |     |
| GO:0016072                                                              | 1.90780185477206e-05 | 12.2910447761194 | 0.555670887827832  |    |     |
| 6 110 rRNA metabolic process                                            |                      |                  |                    |    |     |
| Tissue: Skin_Sun_Exposed_Lower_leg=>Adipose_Subcutaneous                |                      |                  | Type: asymmetric   |    |     |
| SourceGene: FLG(ENSG00000143631.9)                                      |                      |                  |                    |    |     |
| TargetGeneSet: TNFRSF25 VPS13D UBR4 SH3BGRL3 KHDRBS1 KPNA7              |                      |                  |                    |    |     |
| TMEM234 EIF2C3 MACF1 PPCS RPS8 TXNDC12 EFCAB7 TCTEX1D1 RP4 RPL5         |                      |                  |                    |    |     |
| RP11 DPH5 ATP5F1 HIPK1 POGZ RPS27 MTX1 PRRC2C PIK3C2B LPGAT1            |                      |                  |                    |    |     |
| ZC3H11B HIST3H2A YWHAQ SOS1-IT1 CCDC104 AAK1 ANKRD36BP2                 |                      |                  |                    |    |     |
| PDE11A EEF1B2 ITPR1 SETD5 RPL15 GOLGA4 RPSA RPL14 ZNF445 NICN1 RBM6     |                      |                  |                    |    |     |
| RPL29 SPCS1 ATXN7 PCNP ALDH1L1-AS1 H1FX IGSF10 RPL22L1 AFAP1            |                      |                  |                    |    |     |
| RELL1 OCIAD1 PPA2 CCDC109B RPS3A CTSO WWC2 TAF9 BTF3                    |                      |                  |                    |    |     |

Stable4\_20PerPair

| ZFYVE16    | CTD       | AFF4                 | SKP1     | CTB              | SYNPO       | UBLCP1  | RPL15P3  | RPL10A           | GLO1     |      |
|------------|-----------|----------------------|----------|------------------|-------------|---------|----------|------------------|----------|------|
| YIPF3      | EEF1A1    | VTA1                 | HIVEP2   | ARID1B           | MLLT4       | NPM1P13 | EEF1A1P6 |                  | NT5C3    |      |
| RPS3AP26   |           | BUD31                | MUC3A    | SH2B2            | ARMC10      | MLL3    | CHMP7    | HMBOX1           | KAT6A    |      |
| HOOK3      | CPNE3     | EIF3E                | EBAG9    | EIF3H            | TATDN1      | LY6E    | RPL8     | RPS6             | TESK1    | TLN1 |
| CLTA       | LINC00092 |                      | KLF4     | EEF1A1P5         |             | RPL7A   | U6       | RPS3AP5          | TCTN3    |      |
| C10orf12   |           | SFR1                 | NHLRC2   | RPL27A           | ZBED5       | EIF3M   | PEX16    | CELF1            | TMEM179B |      |
| NAA40      | PPP2R5B   | C11orf2              | C11orf30 |                  | GUCY1A2     | WNT5B   | PHB2     | H3F3C            | ADCY6    |      |
| SMARCC2    | NACA      | RPL18AP3             |          | ATXN2            | RPL6        | RPLP0   | MLXIP    | RPSAP54          | ALG5     | DGKH |
| THSD1P1    | EAPP      | LGALS3               | SIPA1L1  | TTBK2            | RPS3AP47    |         | CCNDBP1  | COPS2            | RSL24D1  |      |
| RAB11A     | LRRC49    | ZNF592               | RPS2     | LITAF            | NDE1        | ARL6IP1 | EIF3C    | DDX19B           | RPL13    |      |
| SGSM2      | RPL26     | STX8                 | NCOR1    | RPL17P43         |             | TAOK1   | RPL19    | SMARCE1          | RAMP2    |      |
| VPS25      | AOC3      | ANKRD40              | CEP95    | PRKCA            | NT5C        | FOXK2   | MPPE1    | PSMG2            | C18orf21 |      |
| RPL17      | RPS15     | PIP5K1C              | RPL36    | ALKBH7           | HNRNPA1P10  |         | LPHN1    | RPL18A           | ZNF585A  |      |
| MEGF8      | ZNF221    | PVR                  | OPA3     | RPL18            | RPL13A      | ZNF551  | RPS5     | ZNF446           | UBE2M    | DTD1 |
| RPL41P1    | RPL12P4   | CBR3-AS1             |          | TFF3             | UBE2G2      | YDJC    | ZNF70    | LIMK2            | EIF3L    | RPL3 |
| TCF20      | IGBP1     | RPS23P8              | RPS4X    | HK2P1            | RP1-177G6.2 |         | RPL10    | SLC10A3          |          |      |
| GOBPID     | Pvalue    | OddsRatio            |          | ExpCount         |             | Count   | Size     | Term             |          |      |
| GO:0006414 |           | 4.19883651788368e-36 |          | 45.1099508599509 |             |         |          | 1.18434710400664 |          |      |
| 31         | 105       |                      |          |                  |             |         |          |                  |          |      |
| GO:0006413 |           | 5.16994216446099e-35 |          | 31.6502430692419 |             |         |          | 1.71448342675247 |          |      |
| 34         | 152       |                      |          |                  |             |         |          |                  |          |      |
| GO:0006415 |           | 6.61977574294832e-35 |          | 49.6574386133847 |             |         |          | 1.02643415680576 |          |      |
| 29         | 91        |                      |          |                  |             |         |          |                  |          |      |
| GO:0006614 |           | 1.85699031974156e-34 |          | 42.7458646616541 |             |         |          | 1.18434710400664 |          |      |
| 30         | 105       |                      |          |                  |             |         |          |                  |          |      |
| GO:0070972 |           | 2.54104864908073e-34 |          | 38.3342911877395 |             |         |          | 1.33098055497889 |          |      |
| 31         | 118       |                      |          |                  |             |         |          |                  |          |      |
| GO:0006613 |           | 2.56679635719011e-34 |          | 42.1804511278196 |             |         |          | 1.19562660023528 |          |      |
| 30         | 106       |                      |          |                  |             |         |          |                  |          |      |
| GO:0045047 |           | 2.56679635719011e-34 |          | 42.1804511278196 |             |         |          | 1.19562660023528 |          |      |
| 30         | 106       |                      |          |                  |             |         |          |                  |          |      |
| GO:0072599 |           | 2.56679635719011e-34 |          | 42.1804511278196 |             |         |          | 1.19562660023528 |          |      |
| 30         | 106       |                      |          |                  |             |         |          |                  |          |      |
| GO:0000184 |           | 1.26820094811398e-32 |          | 35.9863140998564 |             |         |          | 1.34226005120753 |          |      |
| 30         | 119       |                      |          |                  |             |         |          |                  |          |      |
| GO:0006612 |           | 1.69750253516887e-30 |          | 27.2693740685544 |             |         |          | 1.72576292298111 |          |      |
| 31         | 153       |                      |          |                  |             |         |          |                  |          |      |
| GO:0072594 |           | 2.13473847346771e-30 |          | 21.8883720930233 |             |         |          | 2.30101723064148 |          |      |
| 34         | 204       |                      |          |                  |             |         |          |                  |          |      |
| GO:0034623 |           | 1.15351800509854e-28 |          | 23.2302924348379 |             |         |          | 1.96263234378244 |          |      |
| 31         | 174       |                      |          |                  |             |         |          |                  |          |      |
| GO:0006402 |           | 2.40969659025114e-28 |          | 22.5917851989281 |             |         |          | 2.00775032869698 |          |      |
| 31         | 178       |                      |          |                  |             |         |          |                  |          |      |
| GO:0032984 |           | 2.88836305185148e-28 |          | 22.4375511875512 |             |         |          | 2.01902982492561 |          |      |
| 31         | 179       |                      |          |                  |             |         |          |                  |          |      |
| GO:0019080 |           | 7.81204076880227e-28 |          | 25.1293124541228 |             |         |          | 1.70320393052384 |          |      |
| 29         | 151       |                      |          |                  |             |         |          |                  |          |      |
| GO:0019083 |           | 7.81204076880227e-28 |          | 25.1293124541228 |             |         |          | 1.70320393052384 |          |      |
| 29         | 151       |                      |          |                  |             |         |          |                  |          |      |
| GO:0000956 |           | 1.06184197692109e-27 |          | 22.9604587007086 |             |         |          | 1.90623486263926 |          |      |
| 30         | 169       |                      |          |                  |             |         |          |                  |          |      |
| GO:0043624 |           | 1.1697180491529e-27  |          | 24.7205103514685 |             |         |          | 1.72576292298111 |          |      |
| 29         | 153       |                      |          |                  |             |         |          |                  |          |      |
| GO:0043241 |           | 3.12606670420876e-27 |          | 23.7539627444174 |             |         |          | 1.78216040412428 |          |      |
| 29         | 158       |                      |          |                  |             |         |          |                  |          |      |
| GO:0006401 |           | 2.21540800047131e-26 |          | 19.0497213514455 |             |         |          | 2.31229672687011 |          |      |
| 31         | 205       |                      |          |                  |             |         |          |                  |          |      |
| GO:0019058 |           | 2.41564116429031e-22 |          | 15.0913994384513 |             |         |          | 2.60556362881462 |          |      |
| 29         | 231       |                      |          |                  |             |         |          |                  |          |      |
| GO:0071845 |           | 5.30241404916631e-22 |          | 13.0280572523656 |             |         |          | 3.20337692893225 |          |      |
| 31         | 284       |                      |          |                  |             |         |          |                  |          |      |
| GO:0022411 |           | 8.08549203688693e-22 |          | 12.8216307039264 |             |         |          | 3.24849491384679 |          |      |
| 31         | 288       |                      |          |                  |             |         |          |                  |          |      |

Stable4\_20PerPair

|                  |                                         |                                                                     |                  |
|------------------|-----------------------------------------|---------------------------------------------------------------------|------------------|
| GO:0022415       | 7.07728650055852e-21                    | 13.1696388188926                                                    | 2.93266901944502 |
| 29               | 260                                     | viral reproductive process                                          |                  |
| GO:0033365       | 3.6363156943002e-20                     | 8.98459431701472                                                    | 5.33520171614421 |
| 36               | 473                                     | protein localization to organelle                                   |                  |
| GO:0006605       | 3.90054463529613e-20                    | 8.9634343652249                                                     | 5.34648121237285 |
| 474              |                                         | protein targeting                                                   | 36               |
| GO:0016032       | 5.5316886595421e-18                     | 8.42307692307692                                                    | 5.08705279911425 |
| 33               | 451                                     | viral reproduction                                                  |                  |
| GO:0071843       | 8.35096820201633e-08                    | 6.36341698841699                                                    | 2.69579959864369 |
| 15               | 239                                     | cellular component biogenesis at cellular level                     |                  |
| GO:0022613       | 1.60694009045159e-06                    | 5.75433962264151                                                    | 2.53788665144281 |
| 13               | 225                                     | ribonucleoprotein complex biogenesis                                |                  |
| GO:0042254       | 7.1899920759704e-06                     | 6.65303051676306                                                    | 1.68064493806657 |
| 10               | 149                                     | ribosome biogenesis                                                 |                  |
| Tissue: Skin_Sun | Exposed_Lower_leg=>Adipose_Subcutaneous |                                                                     | Type: cluster    |
| SourceGene:      | FLG(ENSG00000143631.9)                  |                                                                     |                  |
| TargetGeneSet:   | TNFRSF25                                | VPS13D                                                              | UBR4             |
| TMEM234          | EIF2C3                                  | MACF1                                                               | PPCS             |
| RP11             | DPH5                                    | ATP5F1                                                              | HIPK1            |
| ZC3H11B          | HIST3H2A                                |                                                                     | YWHAQ            |
| PDE11A           | EEF1B2                                  | ITPR1                                                               | SETD5            |
| RPL29            | SPCS1                                   | ATXN7                                                               | PCNP             |
| RELL1            | OCIAD1                                  | PPA2                                                                | CCDC109B         |
| ZFYVE16          | CTD                                     | AFF4                                                                | SKP1             |
| YIPF3            | EEF1A1                                  | VTA1                                                                | HIVEP2           |
| RPS3AP26         |                                         | BUD31                                                               | MUC3A            |
| HOOK3            | CPNE3                                   | EIF3E                                                               | EIF3H            |
| CLTA             | LINC00092                               |                                                                     | KLF4             |
| C10orf12         |                                         | SFR1                                                                | NHLRC2           |
| NAA40            | PPP2R5B                                 | C11orf2                                                             | C11orf30         |
| SMARCC2          | NACA                                    |                                                                     | RPL18AP3         |
| THSD1P1          | EAPP                                    | LGALS3                                                              | SIPA1L1          |
| RAB11A           | LRRC49                                  | ZNF592                                                              | RPS2             |
| SGSM2            | RPL26                                   | STX8                                                                | NCOR1            |
| VPS25            | AOC3                                    | ANKRD40                                                             | CEP95            |
| RPL17            | RPS15                                   | PIP5K1C                                                             | RPL36            |
| MEGF8            | ZNF221                                  | PVR                                                                 | OPA3             |
| RPL41P1          | RPL12P4                                 |                                                                     | CBR3-AS1         |
| TCF20            | IGBP1                                   |                                                                     | RPS23P8          |
| GOBPID           | Pvalue                                  | OddsRatio                                                           | ExpCount         |
| GO:0006414       | 4.19883651788368e-36                    | 45.1099508599509                                                    | 1.18434710400664 |
| 31               | 105                                     | translational elongation                                            |                  |
| GO:0006413       | 5.16994216446099e-35                    | 31.6502430692419                                                    | 1.71448342675247 |
| 34               | 152                                     | translational initiation                                            |                  |
| GO:0006415       | 6.61977574294832e-35                    | 49.6574386133847                                                    | 1.02643415680576 |
| 29               | 91                                      | translational termination                                           |                  |
| GO:0006614       | 1.85699031974156e-34                    | 42.7458646616541                                                    | 1.18434710400664 |
| 30               | 105                                     | SRP-dependent cotranslational protein targeting to membrane         |                  |
| GO:0070972       | 2.54104864908073e-34                    | 38.3342911877395                                                    | 1.33098055497889 |
| 31               | 118                                     | protein localization to endoplasmic reticulum                       |                  |
| GO:0006613       | 2.56679635719011e-34                    | 42.1804511278196                                                    | 1.19562660023528 |
| 30               | 106                                     | cotranslational protein targeting to membrane                       |                  |
| GO:0045047       | 2.56679635719011e-34                    | 42.1804511278196                                                    | 1.19562660023528 |
| 30               | 106                                     | protein targeting to ER                                             |                  |
| GO:0072599       | 2.56679635719011e-34                    | 42.1804511278196                                                    | 1.19562660023528 |
| 30               | 106                                     | establishment of protein localization to endoplasmic reticulum      |                  |
| GO:0000184       | 1.26820094811398e-32                    | 35.9863140998564                                                    | 1.34226005120753 |
| 30               | 119                                     | nuclear-transcribed mRNA catabolic process, nonsense-mediated decay |                  |
| GO:0006612       | 1.69750253516887e-30                    | 27.2693740685544                                                    | 1.72576292298111 |
| 31               | 153                                     | protein targeting to membrane                                       |                  |
| GO:0072594       | 2.13473847346771e-30                    | 21.8883720930233                                                    | 2.30101723064148 |
| 34               | 204                                     | establishment of protein localization to organelle                  |                  |
| GO:0034623       | 1.15351800509854e-28                    | 23.2302924348379                                                    | 1.96263234378244 |

Stable4\_20PerPair

|                 |          |                                                                |                  |                   |      |                   |  |                  |
|-----------------|----------|----------------------------------------------------------------|------------------|-------------------|------|-------------------|--|------------------|
| 31              | 174      | cellular macromolecular complex disassembly                    |                  |                   |      |                   |  |                  |
| GO:0006402      |          | 2.40969659025114e-28                                           | 22.5917851989281 |                   |      |                   |  | 2.00775032869698 |
| 31              | 178      | mRNA catabolic process                                         |                  |                   |      |                   |  |                  |
| GO:0032984      |          | 2.88836305185148e-28                                           | 22.4375511875512 |                   |      |                   |  | 2.01902982492561 |
| 31              | 179      | macromolecular complex disassembly                             |                  |                   |      |                   |  |                  |
| GO:0019080      |          | 7.81204076880227e-28                                           | 25.1293124541228 |                   |      |                   |  | 1.70320393052384 |
| 29              | 151      | viral genome expression                                        |                  |                   |      |                   |  |                  |
| GO:0019083      |          | 7.81204076880227e-28                                           | 25.1293124541228 |                   |      |                   |  | 1.70320393052384 |
| 29              | 151      | viral transcription                                            |                  |                   |      |                   |  |                  |
| GO:0000956      |          | 1.06184197692109e-27                                           | 22.9604587007086 |                   |      |                   |  | 1.90623486263926 |
| 30              | 169      | nuclear-transcribed mRNA catabolic process                     |                  |                   |      |                   |  |                  |
| GO:0043624      |          | 1.1697180491529e-27                                            | 24.7205103514685 |                   |      |                   |  | 1.72576292298111 |
| 29              | 153      | cellular protein complex disassembly                           |                  |                   |      |                   |  |                  |
| GO:0043241      |          | 3.12606670420876e-27                                           | 23.7539627444174 |                   |      |                   |  | 1.78216040412428 |
| 29              | 158      | protein complex disassembly                                    |                  |                   |      |                   |  |                  |
| GO:0006401      |          | 2.21540800047131e-26                                           | 19.0497213514455 |                   |      |                   |  | 2.31229672687011 |
| 31              | 205      | RNA catabolic process                                          |                  |                   |      |                   |  |                  |
| GO:0019058      |          | 2.41564116429031e-22                                           | 15.0913994384513 |                   |      |                   |  | 2.60556362881462 |
| 29              | 231      | viral infectious cycle                                         |                  |                   |      |                   |  |                  |
| GO:0071845      |          | 5.30241404916631e-22                                           | 13.0280572523656 |                   |      |                   |  | 3.20337692893225 |
| 31              | 284      | cellular component disassembly at cellular level               |                  |                   |      |                   |  |                  |
| GO:0022411      |          | 8.08549203688693e-22                                           | 12.8216307039264 |                   |      |                   |  | 3.24849491384679 |
| 31              | 288      | cellular component disassembly                                 |                  |                   |      |                   |  |                  |
| GO:0022415      |          | 7.07728650055852e-21                                           | 13.1696388188926 |                   |      |                   |  | 2.93266901944502 |
| 29              | 260      | viral reproductive process                                     |                  |                   |      |                   |  |                  |
| GO:0033365      |          | 3.6363156943002e-20                                            | 8.98459431701472 |                   |      |                   |  | 5.33520171614421 |
| 36              | 473      | protein localization to organelle                              |                  |                   |      |                   |  |                  |
| GO:0006605      |          | 3.90054463529613e-20                                           | 8.9634343652249  | 5.34648121237285  |      |                   |  | 36               |
| 474             |          | protein targeting                                              |                  |                   |      |                   |  |                  |
| GO:0016032      |          | 5.5316886595421e-18                                            | 8.42307692307692 |                   |      |                   |  | 5.08705279911425 |
| 33              | 451      | viral reproduction                                             |                  |                   |      |                   |  |                  |
| GO:0071843      |          | 8.35096820201633e-08                                           | 6.36341698841699 |                   |      |                   |  | 2.69579959864369 |
| 15              | 239      | cellular component biogenesis at cellular level                |                  |                   |      |                   |  |                  |
| GO:0022613      |          | 1.60694009045159e-06                                           | 5.75433962264151 |                   |      |                   |  | 2.53788665144281 |
| 13              | 225      | ribonucleoprotein complex biogenesis                           |                  |                   |      |                   |  |                  |
| GO:0042254      |          | 7.1899920759704e-06                                            | 6.65303051676306 |                   |      |                   |  | 1.68064493806657 |
| 10              | 149      | ribosome biogenesis                                            |                  |                   |      |                   |  |                  |
| Tissue: Adipose |          | Subcutaneous=>Skin_Sun_Exposed_Lower_leg                       |                  |                   |      |                   |  | Type: asymmetric |
| SourceGene:     |          | HIST1H2BPS3(ENSG00000226908.1)                                 |                  |                   |      |                   |  |                  |
| TargetGeneSet:  |          | ARHGEF19-AS1 RPL11 ZCCHC17 RP11 PPIE CCDC23 RPS8               |                  |                   |      |                   |  |                  |
| UQCRH           | BTF3L4   | ZYG11A HBXIP MRPS21 PAQR6 DCAF6 OCLM SNRPE NFASC SRP9          |                  |                   |      |                   |  |                  |
| TOMM20          | RPS7     | UBC COA5 TXNDC9 RPL31 ERCC3 BBS5 NIF3L1 NBEAL1                 |                  |                   |      |                   |  |                  |
| EEF1B2          | CCDC51   | RYK CLDN18 EIF2S1 PARL NCBP2 TMEM128 C4orf52 RPL34 OSTC        |                  |                   |      |                   |  |                  |
| RPS3A           | CDKN2AIP | CTD TAF9 ZFYVE16 CAMLG PDF TMEM14C TMEM14B                     |                  |                   |      |                   |  |                  |
| EEF1A1          | IL6      | RPS3AP26 GIGYF1 MRPS33 PRAGMIN C8orf40 RPS20 PAF1 RPS6         |                  |                   |      |                   |  |                  |
| CLTA            | C10orf31 | RPS24 C10orf95 FAM204A FAM45A PRKRIR CLNS1A                    |                  |                   |      |                   |  |                  |
| RPS25           | KANSL2   | PRKAG1 PFDN5 C12orf47 RPL6 EBPL CCNB1IP1 SNX6                  |                  |                   |      |                   |  |                  |
| QRSL1P3         | PSEN1    | MOAP1 TMEM87A PLDN RSL24D1 RPS3AP6 SEC11A RSL1D1 RPS15A        |                  |                   |      |                   |  |                  |
| LYRM1           | HSBP1    | MED11 RPAIN MIR497HG RPL26 RPS7P1 ZNHIT3 RPL19                 |                  |                   |      |                   |  |                  |
| RPL27           | RPS7P11  | MRPS23 CEP95 NUP85 C18orf21 RPL17 CTB KXD1                     |                  |                   |      |                   |  |                  |
| ZNF91           | MED29    | ZNF350 ZNF530 SNHG11 LINC00266-1 C22orf39 SNRPD3               |                  |                   |      |                   |  |                  |
| TFIP11          |          |                                                                |                  |                   |      |                   |  |                  |
| GOBPID          | Pvalue   | OddsRatio                                                      | ExpCount         | Count             | Size | Term              |  |                  |
| GO:0006414      |          | 4.68879241829736e-26                                           | 56.9770687936191 |                   |      | 0.574008719119784 |  |                  |
| 20              | 105      | translational elongation                                       |                  |                   |      |                   |  |                  |
| GO:0006614      |          | 2.60000832159518e-24                                           | 52.603488372093  | 0.574008719119784 |      | 19                |  |                  |
| 105             |          | SRP-dependent cotranslational protein targeting to membrane    |                  |                   |      |                   |  |                  |
| GO:0006613      |          | 3.15525435272982e-24                                           | 51.9952107279694 |                   |      | 0.579475468825687 |  |                  |
| 19              | 106      | cotranslational protein targeting to membrane                  |                  |                   |      |                   |  |                  |
| GO:0045047      |          | 3.15525435272982e-24                                           | 51.9952107279694 |                   |      | 0.579475468825687 |  |                  |
| 19              | 106      | protein targeting to ER                                        |                  |                   |      |                   |  |                  |
| GO:0072599      |          | 3.15525435272982e-24                                           | 51.9952107279694 |                   |      | 0.579475468825687 |  |                  |
| 19              | 106      | establishment of protein localization to endoplasmic reticulum |                  |                   |      |                   |  |                  |

Stable4\_20PerPair

|                 |                                          |                                                                     |                               |
|-----------------|------------------------------------------|---------------------------------------------------------------------|-------------------------------|
| GO:0070972      | 2.77648144031352e-23                     | 45.6543771043771                                                    | 0.645076465296519             |
| 19              | 118                                      | protein localization to endoplasmic reticulum                       |                               |
| GO:0072594      | 6.07173632209886e-23                     | 30.0925390399075                                                    | 1.11521694000415              |
| 22              | 204                                      | establishment of protein localization to organelle                  |                               |
| GO:0006415      | 4.66691310185766e-22                     | 52.9786399302528                                                    | 0.497474223237146             |
| 17              | 91                                       | translational termination                                           |                               |
| GO:0000184      | 1.45095272374048e-21                     | 41.6942054861224                                                    | 0.650543215002422             |
| 18              | 119                                      | nuclear-transcribed mRNA catabolic process, nonsense-mediated decay |                               |
| GO:0019080      | 3.74181197590497e-21                     | 34.1616161616162                                                    | 0.825479205591309             |
| 19              | 151                                      | viral genome expression                                             |                               |
| GO:0019083      | 3.74181197590497e-21                     | 34.1616161616162                                                    | 0.825479205591309             |
| 19              | 151                                      | viral transcription                                                 |                               |
| GO:0006413      | 4.25934168104889e-21                     | 33.902380952381                                                     | 0.830945955297211             |
| 152             |                                          | translational initiation                                            | 19                            |
| GO:0006612      | 4.84392698848335e-21                     | 33.6470149253731                                                    | 0.836412705003114             |
| 19              | 153                                      | protein targeting to membrane                                       |                               |
| GO:0019058      | 5.97187770952481e-19                     | 22.7504217206201                                                    | 1.26281918206353              |
| 20              | 231                                      | viral infectious cycle                                              |                               |
| GO:0000956      | 9.91995462944465e-19                     | 27.7904679187927                                                    | 0.923880700297557             |
| 18              | 169                                      | nuclear-transcribed mRNA catabolic process                          |                               |
| GO:0006402      | 2.55635940821192e-18                     | 26.2106557377049                                                    | 0.973081447650682             |
| 18              | 178                                      | mRNA catabolic process                                              |                               |
| GO:0043624      | 4.85934692713925e-18                     | 28.7016129032258                                                    | 0.836412705003114             |
| 17              | 153                                      | cellular protein complex disassembly                                |                               |
| GO:0022415      | 6.24684969268092e-18                     | 19.9604519774011                                                    | 1.4213549235347               |
| 260             |                                          | viral reproductive process                                          | 20                            |
| GO:0043241      | 8.4773155886639e-18                      | 27.6741020361473                                                    | 0.863746453532627             |
| 17              | 158                                      | protein complex disassembly                                         |                               |
| GO:0033365      | 2.7549704860241e-17                      | 13.5311601538773                                                    | 2.58577261089198              |
| 24              | 473                                      | protein localization to organelle                                   |                               |
| GO:0006605      | 2.89098685052357e-17                     | 13.5001212121212                                                    | 2.59123936059788              |
| 24              | 474                                      | protein targeting                                                   |                               |
| GO:0006401      | 3.28504505635192e-17                     | 22.3836240904708                                                    | 1.12068368971005              |
| 18              | 205                                      | RNA catabolic process                                               |                               |
| GO:0034623      | 4.45450046257981e-17                     | 24.8258680912266                                                    | 0.951214448827071             |
| 17              | 174                                      | cellular macromolecular complex disassembly                         |                               |
| GO:0032984      | 7.23068465679501e-17                     | 24.0511748307447                                                    | 0.978548197356584             |
| 17              | 179                                      | macromolecular complex disassembly                                  |                               |
| GO:0016032      | 1.71301873968885e-15                     | 12.5443094916779                                                    | 2.46550411736212              |
| 22              | 451                                      | viral reproduction                                                  |                               |
| GO:0071845      | 1.04758933789708e-14                     | 15.6482189079256                                                    | 1.55255691647637              |
| 18              | 284                                      | cellular component disassembly at cellular level                    |                               |
| GO:0022411      | 1.33611111028828e-14                     | 15.4120218579235                                                    | 1.57442391529998              |
| 18              | 288                                      | cellular component disassembly                                      |                               |
| GO:0022613      | 2.38077437408928e-10                     | 13.156089193825                                                     | 1.23001868382811              |
| 225             |                                          | ribonucleoprotein complex biogenesis                                | 13                            |
| GO:0071843      | 5.01844496662537e-10                     | 12.3289085545723                                                    | 1.30655317971075              |
| 13              | 239                                      | cellular component biogenesis at cellular level                     |                               |
| GO:0042274      | 3.48044442213014e-08                     | 74.6309771309771                                                    | 0.0984014947062487            |
| 5               | 18                                       | ribosomal small subunit biogenesis                                  |                               |
| GO:0000387      | 6.52911111474096e-07                     | 37.2817047817048                                                    | 0.169469240882984             |
| 5               | 31                                       | spliceosomal snRNP assembly                                         |                               |
| GO:0022618      | 8.36310802637277e-07                     | 15.7809343434343                                                    | 0.519341222060757             |
| 7               | 95                                       | ribonucleoprotein complex assembly                                  |                               |
| GO:0071826      | 1.18534517842131e-06                     | 14.9272700119474                                                    | 0.546674970590271             |
| 7               | 100                                      | ribonucleoprotein complex subunit organization                      |                               |
| GO:0042254      | 1.48704832286028e-06                     | 11.3722904804715                                                    | 0.814545706179503             |
| 8               | 149                                      | ribosome biogenesis                                                 |                               |
| GO:0034660      | 3.29909815018209e-06                     | 7.42924901185771                                                    | 1.55802366618227              |
| 10              | 285                                      | ncRNA metabolic process                                             |                               |
| Tissue: Adipose | Subcutaneous=>Skin_Sun_Exposed_Lower_leg |                                                                     | Type: cluster                 |
| SourceGene:     | HIST1H2BPS3(ENSG00000226908.1)           |                                                                     |                               |
| TargetGeneSet:  | ARHGEF19-AS1                             | RPL11                                                               | ZCCHC17 RP11 PPIE CCDC23 RPS8 |

Stable4\_20PerPair

|         |          |          |         |          |             |         |          |          |         |      |
|---------|----------|----------|---------|----------|-------------|---------|----------|----------|---------|------|
| UQCRH   | BTF3L4   | ZYG11A   | HBXIP   | MRPS21   | PAQR6       | DCAF6   | OCLM     | SNRPE    | NFASC   | SRP9 |
| TOMM20  | RPS7     | UBC      | COA5    | TXNDC9   | RPL31       | ERCC3   | BBS5     | NIF3L1   | NBEAL1  |      |
| EEF1B2  | CCDC51   | RYK      | CLDN18  | EIF2S1   | PARL        | NCBP2   | TMEM128  | C4orf52  | RPL34   | OSTC |
| RPS3A   | CDKN2AIP |          | CTD     | TAF9     | ZFYVE16     | CAMLG   | PDF      | TMEM14C  | TMEM14B |      |
| EEF1A1  | IL6      | RPS3AP26 |         | GIGYF1   | MRPS33      | PRAGMIN | C8orf40  | RPS20    | PAF1    | RPS6 |
| CLTA    | C10orf31 |          | RPS24   | C10orf95 |             | FAM204A | FAM45A   | PRKRIR   | CLNS1A  |      |
| RPS25   | KANSL2   | PRKAG1   | PFDN5   | C12orf47 |             | RPL6    | EBPL     | CCNB1IP1 |         | SNX6 |
| QRSL1P3 | PSEN1    | MOAP1    | TMEM87A | PLDN     | RSL24D1     | RPS3AP6 | SEC11A   | RSL1D1   | RPS15A  |      |
| LYRM1   | HSBP1    | MED11    | RPAIN   | MIR497HG |             | RPL26   | RPS7P1   | ZNHIT3   | RPL19   |      |
| RPL27   | RPS7P11  | MRPS23   | CEP95   | NUP85    | C18orf21    |         | RPL17    | CTB      | KXD1    |      |
| ZNF91   | MED29    | ZNF350   | ZNF530  | SNHG11   | LINC00266-1 |         | C22orf39 |          | SNRPD3  |      |

TFIP11

| GOBPID     | Pvalue | OddsRatio                                                   | ExpCount                                                            | Count            | Size              | Term               |
|------------|--------|-------------------------------------------------------------|---------------------------------------------------------------------|------------------|-------------------|--------------------|
| GO:0006414 | 20     | 105                                                         | 4.68879241829736e-26                                                | 56.9770687936191 |                   | 0.574008719119784  |
|            |        |                                                             | translational elongation                                            |                  |                   |                    |
| GO:0006614 | 105    | SRP-dependent cotranslational protein targeting to membrane | 2.60000832159518e-24                                                | 52.603488372093  | 0.574008719119784 | 19                 |
| GO:0006613 | 19     | 106                                                         | 3.15525435272982e-24                                                | 51.9952107279694 |                   | 0.579475468825687  |
|            |        |                                                             | cotranslational protein targeting to membrane                       |                  |                   |                    |
| GO:0045047 | 19     | 106                                                         | 3.15525435272982e-24                                                | 51.9952107279694 |                   | 0.579475468825687  |
|            |        |                                                             | protein targeting to ER                                             |                  |                   |                    |
| GO:0072599 | 19     | 106                                                         | 3.15525435272982e-24                                                | 51.9952107279694 |                   | 0.579475468825687  |
|            |        |                                                             | establishment of protein localization to endoplasmic reticulum      |                  |                   |                    |
| GO:0070972 | 19     | 118                                                         | 2.77648144031352e-23                                                | 45.6543771043771 |                   | 0.645076465296519  |
|            |        |                                                             | protein localization to endoplasmic reticulum                       |                  |                   |                    |
| GO:0072594 | 22     | 204                                                         | 6.07173632209886e-23                                                | 30.0925390399075 |                   | 1.11521694000415   |
|            |        |                                                             | establishment of protein localization to organelle                  |                  |                   |                    |
| GO:0006415 | 17     | 91                                                          | 4.66691310185766e-22                                                | 52.9786399302528 |                   | 0.497474223237146  |
|            |        |                                                             | translational termination                                           |                  |                   |                    |
| GO:0000184 | 18     | 119                                                         | 1.45095272374048e-21                                                | 41.6942054861224 |                   | 0.650543215002422  |
|            |        |                                                             | nuclear-transcribed mRNA catabolic process, nonsense-mediated decay |                  |                   |                    |
| GO:0019080 | 19     | 151                                                         | 3.74181197590497e-21                                                | 34.1616161616162 |                   | 0.825479205591309  |
|            |        |                                                             | viral genome expression                                             |                  |                   |                    |
| GO:0019083 | 19     | 151                                                         | 3.74181197590497e-21                                                | 34.1616161616162 |                   | 0.825479205591309  |
|            |        |                                                             | viral transcription                                                 |                  |                   |                    |
| GO:0006413 | 152    |                                                             | 4.25934168104889e-21                                                | 33.902380952381  | 0.830945955297211 | 19                 |
|            |        |                                                             | translational initiation                                            |                  |                   |                    |
| GO:0006612 | 19     | 153                                                         | 4.84392698848335e-21                                                | 33.6470149253731 |                   | 0.836412705003114  |
|            |        |                                                             | protein targeting to membrane                                       |                  |                   |                    |
| GO:0019058 | 20     | 231                                                         | 5.97187770952481e-19                                                | 22.7504217206201 |                   | 1.26281918206353   |
|            |        |                                                             | viral infectious cycle                                              |                  |                   |                    |
| GO:0000956 | 18     | 169                                                         | 9.91995462944465e-19                                                | 27.7904679187927 |                   | 0.923880700297557  |
|            |        |                                                             | nuclear-transcribed mRNA catabolic process                          |                  |                   |                    |
| GO:0006402 | 18     | 178                                                         | 2.55635940821192e-18                                                | 26.2106557377049 |                   | 0.973081447650682  |
|            |        |                                                             | mRNA catabolic process                                              |                  |                   |                    |
| GO:0043624 | 17     | 153                                                         | 4.85934692713925e-18                                                | 28.7016129032258 |                   | 0.836412705003114  |
|            |        |                                                             | cellular protein complex disassembly                                |                  |                   |                    |
| GO:0022415 | 260    |                                                             | 6.24684969268092e-18                                                | 19.9604519774011 |                   | 1.4213549235347 20 |
|            |        |                                                             | viral reproductive process                                          |                  |                   |                    |
| GO:0043241 | 17     | 158                                                         | 8.4773155886639e-18                                                 | 27.6741020361473 |                   | 0.863746453532627  |
|            |        |                                                             | protein complex disassembly                                         |                  |                   |                    |
| GO:0033365 | 24     | 473                                                         | 2.7549704860241e-17                                                 | 13.5311601538773 |                   | 2.58577261089198   |
|            |        |                                                             | protein localization to organelle                                   |                  |                   |                    |
| GO:0006605 | 24     | 474                                                         | 2.89098685052357e-17                                                | 13.5001212121212 |                   | 2.59123936059788   |
|            |        |                                                             | protein targeting                                                   |                  |                   |                    |
| GO:0006401 | 18     | 205                                                         | 3.28504505635192e-17                                                | 22.3836240904708 |                   | 1.12068368971005   |
|            |        |                                                             | RNA catabolic process                                               |                  |                   |                    |
| GO:0034623 | 17     | 174                                                         | 4.45450046257981e-17                                                | 24.8258680912266 |                   | 0.951214448827071  |
|            |        |                                                             | cellular macromolecular complex disassembly                         |                  |                   |                    |
| GO:0032984 | 17     | 179                                                         | 7.23068465679501e-17                                                | 24.0511748307447 |                   | 0.978548197356584  |
|            |        |                                                             | macromolecular complex disassembly                                  |                  |                   |                    |
| GO:0016032 | 22     | 451                                                         | 1.71301873968885e-15                                                | 12.5443094916779 |                   | 2.46550411736212   |
|            |        |                                                             | viral reproduction                                                  |                  |                   |                    |



Stable4\_20PerPair

|                  |                                                                  |                                                  |                    |
|------------------|------------------------------------------------------------------|--------------------------------------------------|--------------------|
| GO:0071845       | 1.04758933789708e-14                                             | 15.6482189079256                                 | 1.55255691647637   |
| 18               | 284                                                              | cellular component disassembly at cellular level |                    |
| GO:0022411       | 1.33611111028828e-14                                             | 15.4120218579235                                 | 1.57442391529998   |
| 18               | 288                                                              | cellular component disassembly                   |                    |
| GO:0022613       | 2.38077437408928e-10                                             | 13.156089193825                                  | 1.23001868382811   |
| 225              |                                                                  | ribonucleoprotein complex biogenesis             | 13                 |
| GO:0071843       | 5.01844496662537e-10                                             | 12.3289085545723                                 | 1.30655317971075   |
| 13               | 239                                                              | cellular component biogenesis at cellular level  |                    |
| GO:0042274       | 3.48044442213014e-08                                             | 74.6309771309771                                 | 0.0984014947062487 |
| 5                | 18                                                               | ribosomal small subunit biogenesis               |                    |
| GO:0000387       | 6.52911111474096e-07                                             | 37.2817047817048                                 | 0.169469240882984  |
| 5                | 31                                                               | spliceosomal snRNP assembly                      |                    |
| GO:0022618       | 8.36310802637277e-07                                             | 15.7809343434343                                 | 0.519341222060757  |
| 7                | 95                                                               | ribonucleoprotein complex assembly               |                    |
| GO:0071826       | 1.18534517842131e-06                                             | 14.9272700119474                                 | 0.546674970590271  |
| 7                | 100                                                              | ribonucleoprotein complex subunit organization   |                    |
| GO:0042254       | 1.48704832286028e-06                                             | 11.3722904804715                                 | 0.814545706179503  |
| 8                | 149                                                              | ribosome biogenesis                              |                    |
| GO:0034660       | 3.29909815018209e-06                                             | 7.42924901185771                                 | 1.55802366618227   |
| 10               | 285                                                              | ncRNA metabolic process                          |                    |
| Tissue: Skin_Sun | Exposed_Lower_leg=>Adipose_Subcutaneous                          |                                                  | Type: asymmetric   |
| SourceGene:      | ITIH2(ENSG00000151655.12)                                        |                                                  |                    |
| TargetGeneSet:   | C1QA C1QC C1QB VAV3 CD53 PTPN22 FCGR2A HSPA6                     |                                                  |                    |
| PTPRC            | KLHL12 NLRP3 REL PLEK HK2 VAMP8 CYTIP PFKFB4 STAB1 CD86          |                                                  |                    |
| TDGF1P6          | KLHL7 YEATS2-AS1 FGF12-AS3 TLR2 MARCH1 SLC1A3 CTD                |                                                  |                    |
| SERF1B           | CD14 CSF1R HAVCR2 DOCK2 F13A1 TRIM31 AIF1 FGD2 RNASET2           |                                                  |                    |
| IKZF1            | IRF5 TBXAS1 TAS2R4 RP11 SLA SYK FGD3 FKBP15 MRC1                 |                                                  |                    |
| ALOX5            | PIK3AP1 GPAM KCNQ1 TPP1 LYVE1 MS4A6A MS4A7 CCDC88B FOLR2         |                                                  |                    |
| SLCO2B1          | MYO7A IL10RA GRAMD1B SLC37A2 PTPN6 CD163 C3AR1 GPR19 BIN2        |                                                  |                    |
| ARHGAP9          | CHST11 SELPLG DENR ALOX5AP GPR183 RNASE6 RIN3 PLCB2 PSTPIP1 MEFV |                                                  |                    |
| ITGAM            | NOD2 CYBA ARRB2 TMC8 FASN FAM59A GNA15 DENND1C VAV1              |                                                  |                    |
| CD209            | MYO1F LRRC25 QPCTL CD37 CD33 LILRB2 LAIR1 LILRA2 LILRA1          |                                                  |                    |
| LILRB4           | SIGLEC1 RP4 HCK TRPM2 NFAM1 TLR7 TLR8 CYBB WAS                   |                                                  |                    |
| ATP7A            | BTK SASH3 ARHGAP4                                                |                                                  |                    |
| GOBPID           | Pvalue OddsRatio ExpCount Count Size Term                        |                                                  |                    |
| GO:0002252       | 4.64929932941652e-15                                             | 11.5845250639771                                 | 2.53754065462598   |
| 22               | 386                                                              | immune effector process                          |                    |
| GO:0050778       | 2.06860823077317e-12                                             | 10.1528985507246                                 | 2.39291398519134   |
| 19               | 364                                                              | positive regulation of immune response           |                    |
| GO:0051249       | 3.6928613151707e-12                                              | 11.5447272026219                                 | 1.86042488409107   |
| 17               | 283                                                              | regulation of lymphocyte activation              |                    |
| GO:0046649       | 4.75697541221251e-12                                             | 9.00274414850686                                 | 2.84651581205453   |
| 20               | 433                                                              | lymphocyte activation                            |                    |
| GO:0050865       | 7.75040933824717e-12                                             | 10.092227722278                                  | 2.25486125527645   |
| 18               | 343                                                              | regulation of cell activation                    |                    |
| GO:0002253       | 8.89163514691197e-12                                             | 10.8773413347881                                 | 1.96560791640717   |
| 17               | 299                                                              | activation of immune response                    |                    |
| GO:0006954       | 1.5444731655871e-11                                              | 8.39457013574661                                 | 3.03716005812747   |
| 20               | 462                                                              | inflammatory response                            |                    |
| GO:0001817       | 1.6552165497323e-11                                              | 9.60772365464448                                 | 2.36004428759255   |
| 18               | 359                                                              | regulation of cytokine production                |                    |
| GO:0002694       | 2.73910289637392e-11                                             | 10.0743927125506                                 | 2.11023458584181   |
| 17               | 321                                                              | regulation of leukocyte activation               |                    |
| GO:0050867       | 4.4185339385878e-11                                              | 11.7758333333333                                 | 1.57774548474154   |
| 15               | 240                                                              | positive regulation of cell activation           |                    |
| GO:0001816       | 7.99175910680171e-11                                             | 8.66795273691825                                 | 2.59670611030379   |
| 18               | 395                                                              | cytokine production                              |                    |
| GO:0051251       | 1.20452972452744e-10                                             | 12.1718567655549                                 | 1.41339699674763   |
| 14               | 215                                                              | positive regulation of lymphocyte activation     |                    |
| GO:0042110       | 2.4962930731786e-10                                              | 9.39332414254084                                 | 2.0970867068023    |
| 319              |                                                                  | T cell activation                                | 16                 |
| GO:0002696       | 3.4920026195469e-10                                              | 11.1572241952759                                 | 1.53172790810325   |
| 14               | 233                                                              | positive regulation of leukocyte activation      |                    |

Stable4\_20PerPair

|            |                                                                                                                           |                  |                    |    |
|------------|---------------------------------------------------------------------------------------------------------------------------|------------------|--------------------|----|
| GO:0002764 | 7.91708438270233e-10                                                                                                      | 10.4309380605677 | 1.63033700089959   |    |
| 14 248     | immune response-regulating signaling pathway                                                                              |                  |                    |    |
| GO:0002521 | 1.09870989918801e-09                                                                                                      | 9.19141986062718 | 1.98532973496644   |    |
| 15 302     | leukocyte differentiation                                                                                                 |                  |                    |    |
| GO:0050863 | 2.03171116026336e-09                                                                                                      | 10.7835365853659 | 1.45284063386617   |    |
| 13 221     | regulation of T cell activation                                                                                           |                  |                    |    |
| GO:0002757 | 4.28282767285198e-09                                                                                                      | 10.0934959349593 | 1.54487578714276   |    |
| 13 235     | immune response-activating signal transduction                                                                            |                  |                    |    |
| GO:0051240 | 5.83317267710938e-09                                                                                                      | 6.92559419271748 | 2.99114248148917   |    |
| 17 455     | positive regulation of multicellular organismal process                                                                   |                  |                    |    |
| GO:0030098 | 8.87693882294628e-09                                                                                                      | 10.6656626506024 | 1.34108366203031   |    |
| 12 204     | lymphocyte differentiation                                                                                                |                  |                    |    |
| GO:0002443 | 1.29617309746004e-08                                                                                                      | 10.2854029182055 | 1.3871012386686    | 12 |
| 211        | leukocyte mediated immunity                                                                                               |                  |                    |    |
| GO:0050870 | 1.52546464459416e-08                                                                                                      | 11.61875         | 1.12414365787835   | 11 |
| 171        | positive regulation of T cell activation                                                                                  |                  |                    |    |
| GO:0046651 | 1.62096576720511e-08                                                                                                      | 11.5457704821059 | 1.1307175973981    | 11 |
| 172        | lymphocyte proliferation                                                                                                  |                  |                    |    |
| GO:0032943 | 1.82811992378325e-08                                                                                                      | 11.4024978089395 | 1.14386547643762   |    |
| 11 174     | mononuclear cell proliferation                                                                                            |                  |                    |    |
| GO:0050853 | 2.892807956625e-08                                                                                                        | 42.0117244748412 | 0.190644246072936  |    |
| 6 29       | B cell receptor signaling pathway                                                                                         |                  |                    |    |
| GO:0070661 | 2.91327375525076e-08                                                                                                      | 10.8629211918686 | 1.19645699259567   |    |
| 11 182     | leukocyte proliferation                                                                                                   |                  |                    |    |
| GO:0050670 | 3.460543752458e-08                                                                                                        | 12.486391571554  | 0.946647290844924  | 10 |
| 144        | regulation of lymphocyte proliferation                                                                                    |                  |                    |    |
| GO:0032944 | 3.69694969388881e-08                                                                                                      | 12.3930283224401 | 0.953221230364681  |    |
| 10 145     | regulation of mononuclear cell proliferation                                                                              |                  |                    |    |
| GO:0070663 | 5.1061780141714e-08                                                                                                       | 11.946218487395  | 0.986090927963463  | 10 |
| 150        | regulation of leukocyte proliferation                                                                                     |                  |                    |    |
| GO:0030097 | 5.1249018514987e-08                                                                                                       | 6.3020417410019  | 3.04373399764722   | 16 |
| 463        | hemopoiesis                                                                                                               |                  |                    |    |
| GO:0050864 | 5.61233553369622e-08                                                                                                      | 17.9914974019839 | 0.53248910110027   |    |
| 8 81       | regulation of B cell activation                                                                                           |                  |                    |    |
| GO:0050871 | 5.83874944861847e-08                                                                                                      | 24.2173597678917 | 0.354992734066847  |    |
| 7 54       | positive regulation of B cell activation                                                                                  |                  |                    |    |
| GO:0042113 | 6.162525095668e-08                                                                                                        | 11.6931303990128 | 1.00581274652273   |    |
| 10 153     | B cell activation                                                                                                         |                  |                    |    |
| GO:0002250 | 6.92817607085643e-08                                                                                                      | 9.92226890756302 | 1.30164002491177   |    |
| 11 198     | adaptive immune response                                                                                                  |                  |                    |    |
| GO:0002697 | 8.07845295290836e-08                                                                                                      | 9.76353383458647 | 1.32136184347104   |    |
| 11 201     | regulation of immune effector process                                                                                     |                  |                    |    |
| GO:0048534 | 1.28303207528184e-07                                                                                                      | 5.8674982162205  | 3.25410006227943   | 16 |
| 495        | hemopoietic or lymphoid organ development                                                                                 |                  |                    |    |
| GO:0002449 | 1.40755423977504e-07                                                                                                      | 10.6399400524541 | 1.09784789979932   |    |
| 10 167     | lymphocyte mediated immunity                                                                                              |                  |                    |    |
| GO:0050671 | 2.13483859705324e-07                                                                                                      | 14.9090909090909 | 0.631098193896616  |    |
| 8 96       | positive regulation of lymphocyte proliferation                                                                           |                  |                    |    |
| GO:0032946 | 2.31428507863939e-07                                                                                                      | 14.7405398424383 | 0.637672133416373  |    |
| 8 97       | positive regulation of mononuclear cell proliferation                                                                     |                  |                    |    |
| GO:0070665 | 2.93235676301156e-07                                                                                                      | 14.2568715642179 | 0.657393951975642  |    |
| 8 100      | positive regulation of leukocyte proliferation                                                                            |                  |                    |    |
| GO:0002460 | 2.98387086649269e-07                                                                                                      | 9.75920192638459 | 1.18988305307591   |    |
| 10 181     | adaptive immune response based on somatic recombination of immune receptors built from immunoglobulin superfamily domains |                  |                    |    |
| GO:0006897 | 3.90705675177078e-07                                                                                                      | 6.696738172201   | 2.26800913431596   | 13 |
| 345        | endocytosis                                                                                                               |                  |                    |    |
| GO:0001819 | 4.03628815686415e-07                                                                                                      | 9.42439348620804 | 1.22932669019445   |    |
| 10 187     | positive regulation of cytokine production                                                                                |                  |                    |    |
| GO:0002768 | 4.2789146125138e-07                                                                                                       | 11.0240310077519 | 0.946647290844924  |    |
| 9 144      | immune response-regulating cell surface receptor signaling pathway                                                        |                  |                    |    |
| GO:0032695 | 5.58308299541622e-07                                                                                                      | 90.1036106750392 | 0.0723133347173206 |    |
| 4 11       | negative regulation of interleukin-12 production                                                                          |                  |                    |    |

Stable4\_20PerPair

|                                                          |                                                                    |                  |                    |           |       |        |        |        |            |
|----------------------------------------------------------|--------------------------------------------------------------------|------------------|--------------------|-----------|-------|--------|--------|--------|------------|
| GO:0050707                                               | 5.84989016993478e-07                                               | 16.7139037433155 | 0.493045463981731  |           |       |        |        |        |            |
| 7 75                                                     | regulation of cytokine secretion                                   |                  |                    |           |       |        |        |        |            |
| GO:0051607                                               | 7.52046966491052e-07                                               | 12.48035030104   | 0.742855165732475  | 8         |       |        |        |        |            |
| 113                                                      | defense response to virus                                          |                  |                    |           |       |        |        |        |            |
| GO:0030217                                               | 8.4110703672493e-07                                                | 10.1155671570954 | 1.025534565082     | 9         |       |        |        |        |            |
| 156                                                      | T cell differentiation                                             |                  |                    |           |       |        |        |        |            |
| GO:0042098                                               | 1.04663228106465e-06                                               | 11.908881922675  | 0.775724863331257  | 8         |       |        |        |        |            |
| 118                                                      | T cell proliferation                                               |                  |                    |           |       |        |        |        |            |
| GO:0050715                                               | 1.09788502461903e-06                                               | 20.9721543722521 | 0.341844855027334  |           |       |        |        |        |            |
| 6 52                                                     | positive regulation of cytokine secretion                          |                  |                    |           |       |        |        |        |            |
| GO:0045088                                               | 1.44739083782945e-06                                               | 8.12109038737446 | 1.41339699674763   |           |       |        |        |        |            |
| 10 215                                                   | regulation of innate immune response                               |                  |                    |           |       |        |        |        |            |
| GO:0050663                                               | 1.74569161787216e-06                                               | 14.0186588103255 | 0.578506677738565  |           |       |        |        |        |            |
| 7 88                                                     | cytokine secretion                                                 |                  |                    |           |       |        |        |        |            |
| GO:0031347                                               | 2.23262646552198e-06                                               | 5.67723577235772 | 2.64929762646184   |           |       |        |        |        |            |
| 13 403                                                   | regulation of defense response                                     |                  |                    |           |       |        |        |        |            |
| GO:0042108                                               | 2.341651746052e-06                                                 | 18.1933432266271 | 0.387862431665629  |           |       |        |        |        |            |
| 6 59                                                     | positive regulation of cytokine biosynthetic process               |                  |                    |           |       |        |        |        |            |
| GO:0002429                                               | 2.58657289106293e-06                                               | 10.4687816091954 | 0.874333956127604  |           |       |        |        |        |            |
| 8 133                                                    | immune response-activating cell surface receptor signaling pathway |                  |                    |           |       |        |        |        |            |
| GO:0032621                                               | 2.72629797643103e-06                                               | 234.032608695652 | 0.0328696975987821 |           |       |        |        |        |            |
| 3 5                                                      | interleukin-18 production                                          |                  |                    |           |       |        |        |        |            |
| GO:0032655                                               | 3.06646316422408e-06                                               | 26.5296296296296 | 0.230087883191475  |           |       |        |        |        |            |
| 5 35                                                     | regulation of interleukin-12 production                            |                  |                    |           |       |        |        |        |            |
| GO:0045621                                               | 3.14464618440672e-06                                               | 17.215088282504  | 0.407584250224898  | 6         |       |        |        |        |            |
| 62                                                       | positive regulation of lymphocyte differentiation                  |                  |                    |           |       |        |        |        |            |
| GO:0045619                                               | 3.86048517389463e-06                                               | 12.3330039525692 | 0.650820012455885  |           |       |        |        |        |            |
| 7 99                                                     | regulation of lymphocyte differentiation                           |                  |                    |           |       |        |        |        |            |
| GO:0032615                                               | 4.07494624917772e-06                                               | 24.8680555555556 | 0.243235762230987  |           |       |        |        |        |            |
| 5 37                                                     | interleukin-12 production                                          |                  |                    |           |       |        |        |        |            |
| GO:0042129                                               | 4.41287739692783e-06                                               | 12.0689071566731 | 0.663967891495398  |           |       |        |        |        |            |
| 7 101                                                    | regulation of T cell proliferation                                 |                  |                    |           |       |        |        |        |            |
| GO:0042102                                               | 4.55065181314951e-06                                               | 16.0629213483146 | 0.433880008303924  |           |       |        |        |        |            |
| 6 66                                                     | positive regulation of T cell proliferation                        |                  |                    |           |       |        |        |        |            |
| GO:0009615                                               | 5.01757228999279e-06                                               | 7.00868701911144 | 1.62376306137984   |           |       |        |        |        |            |
| 10 247                                                   | response to virus                                                  |                  |                    |           |       |        |        |        |            |
| GO:0007229                                               | 5.42439944753266e-06                                               | 15.5425878941646 | 0.447027887343436  |           |       |        |        |        |            |
| 6 68                                                     | integrin-mediated signaling pathway                                |                  |                    |           |       |        |        |        |            |
| GO:0009306                                               | 8.06844089082708e-06                                               | 8.88826335131754 | 1.01896062556224   |           |       |        |        |        |            |
| 8 155                                                    | protein secretion                                                  |                  |                    |           |       |        |        |        |            |
| GO:0071706                                               | 8.21678493874274e-06                                               | 14.377662250545  | 0.479897584942219  | 6         |       |        |        |        |            |
| 73                                                       | tumor necrosis factor superfamily cytokine production              |                  |                    |           |       |        |        |        |            |
| GO:0019724                                               | 9.85028159520951e-06                                               | 10.5929269328802 | 0.749429105252232  |           |       |        |        |        |            |
| 7 114                                                    | B cell mediated immunity                                           |                  |                    |           |       |        |        |        |            |
| GO:0050708                                               | 1.10439899371224e-05                                               | 10.3971017514595 | 0.762576984291744  |           |       |        |        |        |            |
| 7 116                                                    | regulation of protein secretion                                    |                  |                    |           |       |        |        |        |            |
| GO:0050714                                               | 1.12052339363367e-05                                               | 13.5638550403545 | 0.506193343021244  |           |       |        |        |        |            |
| 6 77                                                     | positive regulation of protein secretion                           |                  |                    |           |       |        |        |        |            |
| GO:0032602                                               | 1.36149834757131e-05                                               | 18.9338624338624 | 0.308975157428552  |           |       |        |        |        |            |
| 5 47                                                     | chemokine production                                               |                  |                    |           |       |        |        |        |            |
| GO:0006959                                               | 1.53663161154454e-05                                               | 9.85049407114625 | 0.802020621410283  |           |       |        |        |        |            |
| 7 122                                                    | humoral immune response                                            |                  |                    |           |       |        |        |        |            |
| GO:0046631                                               | 1.6118246502793e-05                                                | 12.6670609107037 | 0.539063040620026  |           |       |        |        |        |            |
| 6 82                                                     | alpha-beta T cell activation                                       |                  |                    |           |       |        |        |        |            |
| GO:0050851                                               | 1.62070283714701e-05                                               | 9.76489028213166 | 0.808594560930039  |           |       |        |        |        |            |
| 7 123                                                    | antigen receptor-mediated signaling pathway                        |                  |                    |           |       |        |        |        |            |
| Tissue: Skin_Sun_Exposed_Lower_leg=>Adipose_Subcutaneous |                                                                    |                  | Type:              | cluster   |       |        |        |        |            |
| SourceGene: ITIH2 (ENSG00000151655.12)                   |                                                                    |                  |                    |           |       |        |        |        |            |
| TargetGeneSet:                                           | C1QA                                                               | C1QC             | C1QB               | VAV3      | CD53  | PTPN22 | FCGR2A | HSPA6  |            |
| PTPRC                                                    | KLHL12                                                             | NLRP3            | REL                | PLEK      | HK2   | VAMP8  | CYTIP  | PFKFB4 | STAB1 CD86 |
| TDGF1P6                                                  | KLHL7                                                              | YEATS2-AS1       |                    | FGF12-AS3 |       | TLR2   | MARCH1 | SLC1A3 | CTD        |
| SERF1B                                                   | CD14                                                               | CEAF1R           | HAVCR2             | DOCK2     | F13A1 | TRIM31 | AIF1   | FGD2   | RNASET2    |
| IKZF1                                                    | IRF5                                                               | TBXAS1           | TAS2R4             | RP11      | SLA   | SYK    | FGD3   | FKBP15 | MRC1       |

Stable4\_20PerPair

| GO:ID      | Pvalue | OddsRatio | ExpCount             | Count            | Size              | Term               |
|------------|--------|-----------|----------------------|------------------|-------------------|--------------------|
| GO:0002252 | 22     | 386       | 4.64929932941652e-15 | 11.5845250639771 |                   | 2.53754065462598   |
| GO:0050778 | 19     | 364       | 2.06860823077317e-12 | 10.1528985507246 |                   | 2.39291398519134   |
| GO:0051249 | 17     | 283       | 3.6928613151707e-12  | 11.5447272026219 |                   | 1.86042488409107   |
| GO:0046649 | 20     | 433       | 4.75697541221251e-12 | 9.00274414850686 |                   | 2.84651581205453   |
| GO:0050865 | 18     | 343       | 7.75040933824717e-12 | 10.0922277722278 |                   | 2.25486125527645   |
| GO:0002253 | 17     | 299       | 8.89163514691197e-12 | 10.8773413347881 |                   | 1.96560791640717   |
| GO:0006954 | 20     | 462       | 1.5444731655871e-11  | 8.39457013574661 |                   | 3.03716005812747   |
| GO:0001817 | 18     | 359       | 1.6552165497323e-11  | 9.60772365464448 |                   | 2.36004428759255   |
| GO:0002694 | 17     | 321       | 2.73910289637392e-11 | 10.0743927125506 |                   | 2.11023458584181   |
| GO:0050867 | 15     | 240       | 4.4185339385878e-11  | 11.7758333333333 |                   | 1.57774548474154   |
| GO:0001816 | 18     | 395       | 7.99175910680171e-11 | 8.66795273691825 |                   | 2.59670611030379   |
| GO:0051251 | 14     | 215       | 1.20452972452744e-10 | 12.1718567655549 |                   | 1.41339699674763   |
| GO:0042110 | 319    |           | 2.4962930731786e-10  | 9.39332414254084 |                   | 2.0970867068023 16 |
| GO:0002696 | 14     | 233       | 3.4920026195469e-10  | 11.1572241952759 |                   | 1.53172790810325   |
| GO:0002764 | 14     | 248       | 7.91708438270233e-10 | 10.4309380605677 |                   | 1.63033700089959   |
| GO:0002521 | 15     | 302       | 1.09870989918801e-09 | 9.19141986062718 |                   | 1.98532973496644   |
| GO:0050863 | 13     | 221       | 2.03171116026336e-09 | 10.7835365853659 |                   | 1.45284063386617   |
| GO:0002757 | 13     | 235       | 4.28282767285198e-09 | 10.0934959349593 |                   | 1.54487578714276   |
| GO:0051240 | 17     | 455       | 5.83317267710938e-09 | 6.92559419271748 |                   | 2.99114248148917   |
| GO:0030098 | 12     | 204       | 8.87693882294628e-09 | 10.6656626506024 |                   | 1.34108366203031   |
| GO:0002443 | 211    |           | 1.29617309746004e-08 | 10.2854029182055 |                   | 1.3871012386686 12 |
| GO:0050870 | 171    |           | 1.52546464459416e-08 | 11.61875         | 1.12414365787835  | 11                 |
| GO:0046651 | 172    |           | 1.62096576720511e-08 | 11.5457704821059 |                   | 1.1307175973981 11 |
| GO:0032943 | 11     | 174       | 1.82811992378325e-08 | 11.4024978089395 |                   | 1.14386547643762   |
| GO:0050853 | 6      | 29        | 2.892807956625e-08   | 42.0117244748412 |                   | 0.190644246072936  |
| GO:0070661 | 11     | 182       | 2.91327375525076e-08 | 10.8629211918686 |                   | 1.19645699259567   |
| GO:0050670 | 144    |           | 3.460543752458e-08   | 12.486391571554  | 0.946647290844924 | 10                 |
| GO:0032944 |        |           | 3.69694969388881e-08 | 12.3930283224401 |                   | 0.953221230364681  |

Stable4\_20PerPair

|            |     |                                                                                                                           |                  |                   |                    |    |
|------------|-----|---------------------------------------------------------------------------------------------------------------------------|------------------|-------------------|--------------------|----|
| 10         | 145 | regulation of mononuclear cell proliferation                                                                              |                  |                   |                    |    |
| GO:0070663 |     | 5.1061780141714e-08                                                                                                       | 11.946218487395  | 0.986090927963463 |                    | 10 |
| 150        |     | regulation of leukocyte proliferation                                                                                     |                  |                   |                    |    |
| GO:0030097 |     | 5.1249018514987e-08                                                                                                       | 6.3020417410019  | 3.04373399764722  |                    | 16 |
| 463        |     | hemopoiesis                                                                                                               |                  |                   |                    |    |
| GO:0050864 |     | 5.61233553369622e-08                                                                                                      | 17.9914974019839 |                   | 0.53248910110027   |    |
| 8          | 81  | regulation of B cell activation                                                                                           |                  |                   |                    |    |
| GO:0050871 |     | 5.83874944861847e-08                                                                                                      | 24.2173597678917 |                   | 0.354992734066847  |    |
| 7          | 54  | positive regulation of B cell activation                                                                                  |                  |                   |                    |    |
| GO:0042113 |     | 6.162525095668e-08                                                                                                        | 11.6931303990128 |                   | 1.00581274652273   |    |
| 10         | 153 | B cell activation                                                                                                         |                  |                   |                    |    |
| GO:0002250 |     | 6.92817607085643e-08                                                                                                      | 9.92226890756302 |                   | 1.30164002491177   |    |
| 11         | 198 | adaptive immune response                                                                                                  |                  |                   |                    |    |
| GO:0002697 |     | 8.07845295290836e-08                                                                                                      | 9.76353383458647 |                   | 1.32136184347104   |    |
| 11         | 201 | regulation of immune effector process                                                                                     |                  |                   |                    |    |
| GO:0048534 |     | 1.28303207528184e-07                                                                                                      | 5.8674982162205  | 3.25410006227943  |                    | 16 |
| 495        |     | hemopoietic or lymphoid organ development                                                                                 |                  |                   |                    |    |
| GO:0002449 |     | 1.40755423977504e-07                                                                                                      | 10.6399400524541 |                   | 1.09784789979932   |    |
| 10         | 167 | lymphocyte mediated immunity                                                                                              |                  |                   |                    |    |
| GO:0050671 |     | 2.13483859705324e-07                                                                                                      | 14.9090909090909 |                   | 0.631098193896616  |    |
| 8          | 96  | positive regulation of lymphocyte proliferation                                                                           |                  |                   |                    |    |
| GO:0032946 |     | 2.31428507863939e-07                                                                                                      | 14.7405398424383 |                   | 0.637672133416373  |    |
| 8          | 97  | positive regulation of mononuclear cell proliferation                                                                     |                  |                   |                    |    |
| GO:0070665 |     | 2.93235676301156e-07                                                                                                      | 14.2568715642179 |                   | 0.657393951975642  |    |
| 8          | 100 | positive regulation of leukocyte proliferation                                                                            |                  |                   |                    |    |
| GO:0002460 |     | 2.98387086649269e-07                                                                                                      | 9.75920192638459 |                   | 1.18988305307591   |    |
| 10         | 181 | adaptive immune response based on somatic recombination of immune receptors built from immunoglobulin superfamily domains |                  |                   |                    |    |
| GO:0006897 |     | 3.90705675177078e-07                                                                                                      | 6.696738172201   | 2.26800913431596  |                    | 13 |
| 345        |     | endocytosis                                                                                                               |                  |                   |                    |    |
| GO:0001819 |     | 4.03628815686415e-07                                                                                                      | 9.42439348620804 |                   | 1.22932669019445   |    |
| 10         | 187 | positive regulation of cytokine production                                                                                |                  |                   |                    |    |
| GO:0002768 |     | 4.2789146125138e-07                                                                                                       | 11.0240310077519 |                   | 0.946647290844924  |    |
| 9          | 144 | immune response-regulating cell surface receptor signaling pathway                                                        |                  |                   |                    |    |
| GO:0032695 |     | 5.58308299541622e-07                                                                                                      | 90.1036106750392 |                   | 0.0723133347173206 |    |
| 4          | 11  | negative regulation of interleukin-12 production                                                                          |                  |                   |                    |    |
| GO:0050707 |     | 5.84989016993478e-07                                                                                                      | 16.7139037433155 |                   | 0.493045463981731  |    |
| 7          | 75  | regulation of cytokine secretion                                                                                          |                  |                   |                    |    |
| GO:0051607 |     | 7.52046966491052e-07                                                                                                      | 12.48035030104   | 0.742855165732475 |                    | 8  |
| 113        |     | defense response to virus                                                                                                 |                  |                   |                    |    |
| GO:0030217 |     | 8.4110703672493e-07                                                                                                       | 10.1155671570954 |                   | 1.025534565082     | 9  |
| 156        |     | T cell differentiation                                                                                                    |                  |                   |                    |    |
| GO:0042098 |     | 1.04663228106465e-06                                                                                                      | 11.9088819222675 | 0.775724863331257 |                    | 8  |
| 118        |     | T cell proliferation                                                                                                      |                  |                   |                    |    |
| GO:0050715 |     | 1.09788502461903e-06                                                                                                      | 20.9721543722521 |                   | 0.341844855027334  |    |
| 6          | 52  | positive regulation of cytokine secretion                                                                                 |                  |                   |                    |    |
| GO:0045088 |     | 1.44739083782945e-06                                                                                                      | 8.12109038737446 |                   | 1.41339699674763   |    |
| 10         | 215 | regulation of innate immune response                                                                                      |                  |                   |                    |    |
| GO:0050663 |     | 1.74569161787216e-06                                                                                                      | 14.0186588103255 |                   | 0.578506677738565  |    |
| 7          | 88  | cytokine secretion                                                                                                        |                  |                   |                    |    |
| GO:0031347 |     | 2.23262646552198e-06                                                                                                      | 5.67723577235772 |                   | 2.64929762646184   |    |
| 13         | 403 | regulation of defense response                                                                                            |                  |                   |                    |    |
| GO:0042108 |     | 2.341651746052e-06                                                                                                        | 18.1933432266271 |                   | 0.387862431665629  |    |
| 6          | 59  | positive regulation of cytokine biosynthetic process                                                                      |                  |                   |                    |    |
| GO:0002429 |     | 2.58657289106293e-06                                                                                                      | 10.4687816091954 |                   | 0.874333956127604  |    |
| 8          | 133 | immune response-activating cell surface receptor signaling pathway                                                        |                  |                   |                    |    |
| GO:0032621 |     | 2.72629797643103e-06                                                                                                      | 234.032608695652 |                   | 0.0328696975987821 |    |
| 3          | 5   | interleukin-18 production                                                                                                 |                  |                   |                    |    |
| GO:0032655 |     | 3.06646316422408e-06                                                                                                      | 26.5296296296296 |                   | 0.230087883191475  |    |
| 5          | 35  | regulation of interleukin-12 production                                                                                   |                  |                   |                    |    |
| GO:0045621 |     | 3.14464618440672e-06                                                                                                      | 17.215088282504  | 0.407584250224898 |                    | 6  |
| 62         |     | positive regulation of lymphocyte differentiation                                                                         |                  |                   |                    |    |
| GO:0045619 |     | 3.86048517389463e-06                                                                                                      | 12.3330039525692 |                   | 0.650820012455885  |    |

Stable4\_20PerPair

|                                                          |                           |                                                                     |                   |         |         |          |        |           |         |      |
|----------------------------------------------------------|---------------------------|---------------------------------------------------------------------|-------------------|---------|---------|----------|--------|-----------|---------|------|
| 7                                                        | 99                        | regulation of lymphocyte differentiation                            |                   |         |         |          |        |           |         |      |
| GO:0032615                                               | 4.07494624917772e-06      | 24.86805555555556                                                   | 0.243235762230987 |         |         |          |        |           |         |      |
| 5                                                        | 37                        | interleukin-12 production                                           |                   |         |         |          |        |           |         |      |
| GO:0042129                                               | 4.41287739692783e-06      | 12.0689071566731                                                    | 0.663967891495398 |         |         |          |        |           |         |      |
| 7                                                        | 101                       | regulation of T cell proliferation                                  |                   |         |         |          |        |           |         |      |
| GO:0042102                                               | 4.55065181314951e-06      | 16.0629213483146                                                    | 0.433880008303924 |         |         |          |        |           |         |      |
| 6                                                        | 66                        | positive regulation of T cell proliferation                         |                   |         |         |          |        |           |         |      |
| GO:0009615                                               | 5.01757228999279e-06      | 7.00868701911144                                                    | 1.62376306137984  |         |         |          |        |           |         |      |
| 10                                                       | 247                       | response to virus                                                   |                   |         |         |          |        |           |         |      |
| GO:0007229                                               | 5.42439944753266e-06      | 15.5425878941646                                                    | 0.447027887343436 |         |         |          |        |           |         |      |
| 6                                                        | 68                        | integrin-mediated signaling pathway                                 |                   |         |         |          |        |           |         |      |
| GO:0009306                                               | 8.06844089082708e-06      | 8.88826335131754                                                    | 1.01896062556224  |         |         |          |        |           |         |      |
| 8                                                        | 155                       | protein secretion                                                   |                   |         |         |          |        |           |         |      |
| GO:0071706                                               | 8.21678493874274e-06      | 14.377662250545                                                     | 0.479897584942219 |         |         |          |        |           | 6       |      |
| 73                                                       |                           | tumor necrosis factor superfamily cytokine production               |                   |         |         |          |        |           |         |      |
| GO:0019724                                               | 9.85028159520951e-06      | 10.5929269328802                                                    | 0.749429105252232 |         |         |          |        |           |         |      |
| 7                                                        | 114                       | B cell mediated immunity                                            |                   |         |         |          |        |           |         |      |
| GO:0050708                                               | 1.10439899371224e-05      | 10.3971017514595                                                    | 0.762576984291744 |         |         |          |        |           |         |      |
| 7                                                        | 116                       | regulation of protein secretion                                     |                   |         |         |          |        |           |         |      |
| GO:0050714                                               | 1.12052339363367e-05      | 13.5638550403545                                                    | 0.506193343021244 |         |         |          |        |           |         |      |
| 6                                                        | 77                        | positive regulation of protein secretion                            |                   |         |         |          |        |           |         |      |
| GO:0032602                                               | 1.36149834757131e-05      | 18.9338624338624                                                    | 0.308975157428552 |         |         |          |        |           |         |      |
| 5                                                        | 47                        | chemokine production                                                |                   |         |         |          |        |           |         |      |
| GO:0006959                                               | 1.53663161154454e-05      | 9.85049407114625                                                    | 0.802020621410283 |         |         |          |        |           |         |      |
| 7                                                        | 122                       | humoral immune response                                             |                   |         |         |          |        |           |         |      |
| GO:0046631                                               | 1.6118246502793e-05       | 12.6670609107037                                                    | 0.539063040620026 |         |         |          |        |           |         |      |
| 6                                                        | 82                        | alpha-beta T cell activation                                        |                   |         |         |          |        |           |         |      |
| GO:0050851                                               | 1.62070283714701e-05      | 9.76489028213166                                                    | 0.808594560930039 |         |         |          |        |           |         |      |
| 7                                                        | 123                       | antigen receptor-mediated signaling pathway                         |                   |         |         |          |        |           |         |      |
| Tissue: Skin_Sun_Exposed_Lower_leg=>Adipose_Subcutaneous |                           |                                                                     | Type: asymmetric  |         |         |          |        |           |         |      |
| SourceGene:                                              | ITIH5(ENSG00000123243.10) |                                                                     |                   |         |         |          |        |           |         |      |
| TargetGeneSet:                                           | RPL5                      | RP11                                                                | ACBD6             | FAM129A | SNRPE   | RPS7P3   | RP4    | LINC00184 |         |      |
| UBC                                                      | ASPRV1                    | TPRKB                                                               | DGUOK             | RPIA    | CCDC115 | EEF1B2   | IMPDH2 | GRM2      | RPL24   |      |
| ZBTB38                                                   | MTHFD2L                   | RPL34                                                               | EPB41L4A-AS1      | CTB     | NPM1    | ERGIC1   | TDP2   | C6orf130  |         |      |
| DST                                                      | MRPS12                    | AASS                                                                | CCDC136           | SSBP1   | ACTR3B  | ESYT2    | PHYHIP | RPS20     | SNHG6   |      |
| RPL30                                                    | COL14A1                   | RPL8                                                                | RPS6              | RPL12   | SSNA1   | SLC25A16 | ZDHHC6 | SFXN4     |         |      |
| EIF3M                                                    | LAMTOR1                   | TAF1D                                                               | RPS25             | JAM3    | PA2G4   | PMCH     | RPS2P5 | RPLP0     | TPT1    | TMX1 |
| GATM                                                     | RPS3AP6                   | PARP16                                                              | RPS2              | SETD6   | NQO1    | EIF4A1   | RPL27  | DUSP3     | STRA13  | FBL  |
| RPS19                                                    | RPL18                     | CTD                                                                 | SNRPB             | MYL9    | RPL3    | AMELX    | RBM3   | RPS4X     | FAM122B |      |
| GOBPID                                                   | Pvalue                    | OddsRatio                                                           | ExpCount          | Count   | Size    | Term     |        |           |         |      |
| GO:0006414                                               | 1.37290287199807e-24      | 65.751724137931                                                     | 0.457753788665144 |         |         |          |        |           | 18      |      |
| 105                                                      |                           | translational elongation                                            |                   |         |         |          |        |           |         |      |
| GO:0006415                                               | 6.39401949771585e-24      | 71.4858989424207                                                    | 0.396719950176458 |         |         |          |        |           |         |      |
| 17                                                       | 91                        | translational termination                                           |                   |         |         |          |        |           |         |      |
| GO:0006413                                               | 3.40217872490138e-23      | 46.2824675324675                                                    | 0.662653103591447 |         |         |          |        |           |         |      |
| 19                                                       | 152                       | translational initiation                                            |                   |         |         |          |        |           |         |      |
| GO:0006614                                               | 8.74213990076292e-23      | 60.054347826087                                                     | 0.457753788665144 |         |         |          |        |           | 17      |      |
| 105                                                      |                           | SRP-dependent cotranslational protein targeting to membrane         |                   |         |         |          |        |           |         |      |
| GO:0006613                                               | 1.0380492635078e-22       | 59.3754274548119                                                    | 0.462113348557193 |         |         |          |        |           |         |      |
| 17                                                       | 106                       | cotranslational protein targeting to membrane                       |                   |         |         |          |        |           |         |      |
| GO:0045047                                               | 1.0380492635078e-22       | 59.3754274548119                                                    | 0.462113348557193 |         |         |          |        |           |         |      |
| 17                                                       | 106                       | protein targeting to ER                                             |                   |         |         |          |        |           |         |      |
| GO:0072599                                               | 1.0380492635078e-22       | 59.3754274548119                                                    | 0.462113348557193 |         |         |          |        |           |         |      |
| 17                                                       | 106                       | establishment of protein localization to endoplasmic reticulum      |                   |         |         |          |        |           |         |      |
| GO:0070972                                               | 7.16419495487119e-22      | 52.2770124838571                                                    | 0.514428067261781 |         |         |          |        |           |         |      |
| 17                                                       | 118                       | protein localization to endoplasmic reticulum                       |                   |         |         |          |        |           |         |      |
| GO:0000184                                               | 8.33292697399427e-22      | 51.7608695652174                                                    | 0.51878762715383  |         |         |          |        |           |         |      |
| 17                                                       | 119                       | nuclear-transcribed mRNA catabolic process, nonsense-mediated decay |                   |         |         |          |        |           |         |      |
| GO:0000956                                               | 1.09434307592245e-20      | 37.7139072847682                                                    | 0.73676562175628  |         |         |          |        |           |         |      |
| 18                                                       | 169                       | nuclear-transcribed mRNA catabolic process                          |                   |         |         |          |        |           |         |      |
| GO:0006402                                               | 2.84717607678322e-20      | 35.57                                                               | 0.776001660784721 |         |         |          |        |           | 18      | 178  |
| mRNA catabolic process                                   |                           |                                                                     |                   |         |         |          |        |           |         |      |
| GO:0019080                                               | 5.64566457535249e-20      | 39.3118105126541                                                    | 0.658293543699398 |         |         |          |        |           |         |      |

STable4\_20PerPair

|                |           |                                                                     |                  |                   |      |                   |                   |    |
|----------------|-----------|---------------------------------------------------------------------|------------------|-------------------|------|-------------------|-------------------|----|
| 17             | 151       | viral genome expression                                             |                  |                   |      |                   |                   |    |
| GO:0019083     |           | 5.64566457535249e-20                                                | 39.3118105126541 |                   |      |                   | 0.658293543699398 |    |
| 17             | 151       | viral transcription                                                 |                  |                   |      |                   |                   |    |
| GO:0006612     |           | 7.10786592667512e-20                                                | 38.7282608695652 |                   |      |                   | 0.667012663483496 |    |
| 17             | 153       | protein targeting to membrane                                       |                  |                   |      |                   |                   |    |
| GO:0043624     |           | 7.10786592667512e-20                                                | 38.7282608695652 |                   |      |                   | 0.667012663483496 |    |
| 17             | 153       | cellular protein complex disassembly                                |                  |                   |      |                   |                   |    |
| GO:0043241     |           | 1.24656410413481e-19                                                | 37.3418131359852 |                   |      |                   | 0.688810462943741 |    |
| 17             | 158       | protein complex disassembly                                         |                  |                   |      |                   |                   |    |
| GO:0006401     |           | 3.76521331109698e-19                                                | 30.3764705882353 |                   |      |                   | 0.893709777870044 |    |
| 18             | 205       | RNA catabolic process                                               |                  |                   |      |                   |                   |    |
| GO:0034623     |           | 6.66196464841807e-19                                                | 33.4986153420105 |                   |      |                   | 0.758563421216525 |    |
| 17             | 174       | cellular macromolecular complex disassembly                         |                  |                   |      |                   |                   |    |
| GO:0032984     |           | 1.08712553227867e-18                                                | 32.4533011272142 |                   |      |                   | 0.78036122067677  |    |
| 17             | 179       | macromolecular complex disassembly                                  |                  |                   |      |                   |                   |    |
| GO:0072594     |           | 1.02653306617973e-17                                                | 28.0652173913043 |                   |      |                   | 0.889350217977995 |    |
| 17             | 204       | establishment of protein localization to organelle                  |                  |                   |      |                   |                   |    |
| GO:0019058     |           | 8.49142697558317e-17                                                | 24.4776513612353 |                   |      |                   | 1.00705833506332  |    |
| 17             | 231       | viral infectious cycle                                              |                  |                   |      |                   |                   |    |
| GO:0022415     |           | 6.21639667524559e-16                                                | 21.5123456790123 |                   |      |                   | 1.13348557193274  |    |
| 17             | 260       | viral reproductive process                                          |                  |                   |      |                   |                   |    |
| GO:0071845     |           | 2.71358709098729e-15                                                | 19.5454323400098 |                   |      |                   | 1.23811500934191  |    |
| 17             | 284       | cellular component disassembly at cellular level                    |                  |                   |      |                   |                   |    |
| GO:0022411     |           | 3.42367614275736e-15                                                | 19.2514840365795 |                   |      |                   | 1.25555324891011  |    |
| 17             | 288       | cellular component disassembly                                      |                  |                   |      |                   |                   |    |
| GO:0016032     |           | 5.06635616100943e-12                                                | 11.8822881186135 |                   |      |                   | 1.9661615113141   | 17 |
| 451            |           | viral reproduction                                                  |                  |                   |      |                   |                   |    |
| GO:0033365     |           | 1.07906029551034e-11                                                | 11.2911899313501 |                   |      |                   | 2.06207182893917  |    |
| 17             | 473       | protein localization to organelle                                   |                  |                   |      |                   |                   |    |
| GO:0006605     |           | 1.11574457936033e-11                                                | 11.2656740557511 |                   |      |                   | 2.06643138883122  |    |
| 17             | 474       | protein targeting                                                   |                  |                   |      |                   |                   |    |
| GO:0022613     |           | 3.08854168778118e-09                                                | 14.0109633357297 |                   |      |                   | 0.980900975711023 |    |
| 11             | 225       | ribonucleoprotein complex biogenesis                                |                  |                   |      |                   |                   |    |
| GO:0071843     |           | 5.81107353804976e-09                                                | 13.1376518218623 |                   |      |                   | 1.04193481419971  |    |
| 11             | 239       | cellular component biogenesis at cellular level                     |                  |                   |      |                   |                   |    |
| GO:0042254     |           | 2.53669368384116e-07                                                | 14.6970986460348 |                   |      |                   | 0.6495744239153   | 8  |
| 149            |           | ribosome biogenesis                                                 |                  |                   |      |                   |                   |    |
| GO:0022618     |           | 3.45736164571389e-06                                                | 16.9118864577173 |                   |      |                   | 0.414158189744654 |    |
| 6              | 95        | ribonucleoprotein complex assembly                                  |                  |                   |      |                   |                   |    |
| GO:0071826     |           | 4.66249303664084e-06                                                | 16.006718924972  | 0.435955989204899 |      |                   |                   | 6  |
| 100            |           | ribonucleoprotein complex subunit organization                      |                  |                   |      |                   |                   |    |
| Tissue:        |           | Skin_Sun_Exposed_Lower_leg=>Adipose_Subcutaneous                    |                  |                   |      | Type:             | cluster           |    |
| SourceGene:    |           | MAP4(ENSG00000047849.17)                                            |                  |                   |      |                   |                   |    |
| TargetGeneSet: |           | RP4 SYF2 KHDRBS1 KPNA7 RP11 GAPDHP33 C1orf43                        |                  |                   |      |                   |                   |    |
| LPIN1          | UBC       | EIF5B SNORD89 GLI2 UGGT1 MZT2B ZRANB3 MMADHC SLC40A1                |                  |                   |      |                   |                   |    |
| SETD5          | CRELD1    | RPL15 GORASP1 MAP4 ATXN7 NDUFB4 PLXND1 COPB2 EIF2S1                 |                  |                   |      |                   |                   |    |
| EIF4G1         | THPO      | NOA1 FAM175A HSD17B11 EPB41L4A-AS1 AFF4 CAMLG                       |                  |                   |      |                   |                   |    |
| PCDHGC4        | RPS14     | MAT2B TRIM41 RPL15P3 DEK VARS HLA-C CSNK2B AGPAT1                   |                  |                   |      |                   |                   |    |
| RPS18          | YIPF3     | C6orf72 ZNF277 ING3 MLL3 GOLGA7 HOOK3 EIF3E EIF3H                   |                  |                   |      |                   |                   |    |
| TATDN1         | RPL8      | SMARCA2 TLN1 CLTA MCART1 XPA SPTAN1 EEF1A1P5                        |                  |                   |      |                   |                   |    |
| RPL7A          | EIF2S2P3  | PYROXD2 MRPL43 GBF1 SFR1 RPL27A CKAP5 CD6                           |                  |                   |      |                   |                   |    |
| DNAJC4         | C11orf2   | PHB2 ATF7IP ZCRB1 ARID2 PFDN5 NACA RPL18AP3 RPL6                    |                  |                   |      |                   |                   |    |
| TRAC           | GOLGA3    | POLR1D TPT1 ITM2B HNRNPA3P5 RPS19P3 TIMM9 NEK9                      |                  |                   |      |                   |                   |    |
| KIAA1737       |           | FAN1 UBR1 CCNDBP1 COPS2 C15orf39 SEC11A MPG CTD                     |                  |                   |      |                   |                   |    |
| NTAN1          | GTF3C1    | FTO C16orf48 VPS53 RPL26 OMG RPL19 CNTNAP1 CLTC                     |                  |                   |      |                   |                   |    |
| SUMO2          | RPL17     | TPGS1 NFIC ALKBH7 PGLS GPI FAM98C B3GNT8 GLTSCR2                    |                  |                   |      |                   |                   |    |
| RPL13A         | ZNF524    | CCDC106 RPS5 RRBP1 SCAND1 UBE2G2 DSTNP1 THAP7 TTC28                 |                  |                   |      |                   |                   |    |
| EIF3L          | LINC00106 | CHST7 IGBP1 SLC16A2 GPR174 AIFM1 RPL10 MT                           |                  |                   |      |                   |                   |    |
| GOBPID         | Pvalue    | OddsRatio                                                           | ExpCount         | Count             | Size | Term              |                   |    |
| GO:0006413     |           | 1.50348157356512e-19                                                | 23.9208754208754 |                   |      | 1.15701335547713  |                   |    |
| 20             | 152       | translational initiation                                            |                  |                   |      |                   |                   |    |
| GO:0000184     |           | 5.80761101464227e-16                                                | 23.5290229291469 |                   |      | 0.905819666459069 |                   |    |
| 16             | 119       | nuclear-transcribed mRNA catabolic process, nonsense-mediated decay |                  |                   |      |                   |                   |    |

Stable4\_20PerPair

|                                                          |                                                                |                  |                                                  |
|----------------------------------------------------------|----------------------------------------------------------------|------------------|--------------------------------------------------|
| GO:0006414                                               | 1.97119866493078e-15                                           | 25.0017543859649 | 0.799252646875649                                |
| 15 105                                                   | translational elongation                                       |                  |                                                  |
| GO:0006614                                               | 1.97119866493078e-15                                           | 25.0017543859649 | 0.799252646875649                                |
| 15 105                                                   | SRP-dependent cotranslational protein targeting to membrane    |                  |                                                  |
| GO:0006613                                               | 2.28190457074742e-15                                           | 24.7252747252747 | 0.806864576845893                                |
| 15 106                                                   | cotranslational protein targeting to membrane                  |                  |                                                  |
| GO:0045047                                               | 2.28190457074742e-15                                           | 24.7252747252747 | 0.806864576845893                                |
| 15 106                                                   | protein targeting to ER                                        |                  |                                                  |
| GO:0072599                                               | 2.28190457074742e-15                                           | 24.7252747252747 | 0.806864576845893                                |
| 15 106                                                   | establishment of protein localization to endoplasmic reticulum |                  |                                                  |
| GO:0006415                                               | 6.15016037404275e-15                                           | 27.0151515151515 | 0.692685627292229                                |
| 14 91                                                    | translational termination                                      |                  |                                                  |
| GO:0070972                                               | 1.18170755331578e-14                                           | 21.8262646908533 | 0.898207736488824                                |
| 15 118                                                   | protein localization to endoplasmic reticulum                  |                  |                                                  |
| GO:0006612                                               | 3.34669986240972e-14                                           | 17.6474607858363 | 1.16462528544737                                 |
| 16 153                                                   | protein targeting to membrane                                  |                  |                                                  |
| GO:0000956                                               | 1.61154252642039e-13                                           | 15.7841746627729 | 1.28641616497128                                 |
| 16 169                                                   | nuclear-transcribed mRNA catabolic process                     |                  |                                                  |
| GO:0034623                                               | 2.54588053133933e-13                                           | 15.2792889846485 | 1.3244758148225 16                               |
| 174                                                      | cellular macromolecular complex disassembly                    |                  |                                                  |
| GO:0006402                                               | 3.6322098745073e-13                                            | 14.8978198056212 | 1.35492353470348                                 |
| 16 178                                                   | mRNA catabolic process                                         |                  |                                                  |
| GO:0032984                                               | 3.9641293195755e-13                                            | 14.8053778880042 | 1.36253546467373                                 |
| 16 179                                                   | macromolecular complex disassembly                             |                  |                                                  |
| GO:0043624                                               | 5.82808726800872e-13                                           | 16.2505720823799 | 1.16462528544737                                 |
| 15 153                                                   | cellular protein complex disassembly                           |                  |                                                  |
| GO:0043241                                               | 9.36613399522253e-13                                           | 15.6768494663231 | 1.2026849352986 15                               |
| 158                                                      | protein complex disassembly                                    |                  |                                                  |
| GO:0072594                                               | 2.99965710984588e-12                                           | 12.8139429606157 | 1.55283371392983                                 |
| 16 204                                                   | establishment of protein localization to organelle             |                  |                                                  |
| GO:0006401                                               | 3.23349530185963e-12                                           | 12.7452437239671 | 1.56044564390008                                 |
| 16 205                                                   | RNA catabolic process                                          |                  |                                                  |
| GO:0019080                                               | 7.81198589296222e-12                                           | 15.1198296836983 | 1.14940142550689                                 |
| 14 151                                                   | viral genome expression                                        |                  |                                                  |
| GO:0019083                                               | 7.81198589296222e-12                                           | 15.1198296836983 | 1.14940142550689                                 |
| 14 151                                                   | viral transcription                                            |                  |                                                  |
| GO:0071845                                               | 4.51469032940714e-11                                           | 9.6354556803995  | 2.16178811154937 17                              |
| 284                                                      | cellular component disassembly at cellular level               |                  |                                                  |
| GO:0022411                                               | 5.62549538531179e-11                                           | 9.49053684085228 | 2.19223583143035                                 |
| 17 288                                                   | cellular component disassembly                                 |                  |                                                  |
| GO:0019058                                               | 2.2105555614356e-10                                            | 10.3252923976608 | 1.75835582312643                                 |
| 15 231                                                   | viral infectious cycle                                         |                  |                                                  |
| GO:0022415                                               | 1.14607266483423e-09                                           | 9.084425349087   | 1.97910179226351 15                              |
| 260                                                      | viral reproductive process                                     |                  |                                                  |
| GO:0033365                                               | 1.66579391655435e-08                                           | 5.97104634495939 | 3.60044287592554                                 |
| 18 473                                                   | protein localization to organelle                              |                  |                                                  |
| GO:0006605                                               | 1.02496465035478e-07                                           | 5.55346933013341 | 3.60805480589579                                 |
| 17 474                                                   | protein targeting                                              |                  |                                                  |
| GO:0016032                                               | 2.93149084197562e-07                                           | 5.44133039863047 | 3.43298041658017                                 |
| 16 451                                                   | viral reproduction                                             |                  |                                                  |
| Tissue: Skin_Sun_Exposed_Lower_leg=>Adipose_Subcutaneous |                                                                |                  | Type: asymmetric                                 |
| SourceGene:                                              | RAB11FIP5(ENSG00000135631.11)                                  |                  |                                                  |
| TargetGeneSet:                                           | NBPF1                                                          | MAN1C1           | KHDRBS1 EIF2C3 SLFNL1 PPCS TMEM53 RP4 RP11       |
| AGL                                                      | HIPK1                                                          | MRPS21           | PPP1R12B SLC8A1 ST3GAL5 PDE11A EEF1B2 ERBB4      |
| ITM2C                                                    | ITPR1                                                          | LAMB2            | ADAMTS9-AS1 LRIG1 RPL24 RPL22L1 NAT8L AFAP1      |
| RPS3A                                                    | FRG1                                                           | CTB              | RPL15P3 C6orf130 YIPF3 RP1 DST RARS2 BVES        |
| HIVEP2                                                   | C6orf72                                                        | EEF1A1P6         | NT5C3 RPS3AP26 CCDC136 SSBP1 RPL7                |
| TATDN1                                                   | SLC45A4                                                        | RPS6             | TLN1 CLTA RPL12 FNBP1 EEF1A1P5 RPL7A             |
| NACC2                                                    | SVIL                                                           | PRKG1            | RPS24 RPS3AP5 EXOSC1 SFR1 ZDHHC6 RP13 ZBED5      |
| C11orf9                                                  | GUCY1A2                                                        | JAM3             | ADCY6 NACA SLC35E3 RPL18AP3 RPL6 TPT1            |
| DHRS4L2                                                  | EAPP                                                           | LGALS3           | CCNDBP1 LITAF PAPP5 RPL13 KIF1C RPL26 RPL17P43   |
| ANKRD40                                                  | PRKCA                                                          | NT5C             | CTD CTIF RPL17 RPS15 PIP5K1C HNRNPA1P10          |
| ZNF823                                                   | LPHN1                                                          | RPL18A           | UBA52 RPL13A ZNF551 RPS5 SLC24A3 RPL41P1 RPL12P4 |



Stable4\_20PerPair

| EIF3L      | RPL3   | UXT       | RPS4X                | RPL39            | RPL10             |                                                                     |                   |  |  |
|------------|--------|-----------|----------------------|------------------|-------------------|---------------------------------------------------------------------|-------------------|--|--|
| GOBPID     | Pvalue | OddsRatio | ExpCount             | Count            | Size              | Term                                                                |                   |  |  |
| GO:0006414 | 21     | 105       | 3.34308530451034e-27 | 56.6785714285714 |                   | translational elongation                                            | 0.610338384886859 |  |  |
| GO:0006415 | 20     | 91        | 8.11219692278849e-27 | 62.9225352112676 |                   | translational termination                                           | 0.528959933568611 |  |  |
| GO:0006402 | 24     | 178       | 1.03365059022287e-26 | 36.9168831168831 |                   | mRNA catabolic process                                              | 1.03466888104629  |  |  |
| GO:0000184 | 21     | 119       | 5.71302332623627e-26 | 48.5340136054422 |                   | nuclear-transcribed mRNA catabolic process, nonsense-mediated decay | 0.691716836205107 |  |  |
| GO:0000956 | 23     | 169       | 1.08166172969118e-25 | 36.7261396811139 |                   | nuclear-transcribed mRNA catabolic process                          | 0.982354162341706 |  |  |
| GO:0006614 | 20     | 105       | 1.84568990510762e-25 | 52.5073529411765 |                   | SRP-dependent cotranslational protein targeting to membrane         | 0.610338384886859 |  |  |
| GO:0006613 | 20     | 106       | 2.26526531193945e-25 | 51.8931686046512 |                   | cotranslational protein targeting to membrane                       | 0.616151131409591 |  |  |
| GO:0045047 | 20     | 106       | 2.26526531193945e-25 | 51.8931686046512 |                   | protein targeting to ER                                             | 0.616151131409591 |  |  |
| GO:0072599 | 20     | 106       | 2.26526531193945e-25 | 51.8931686046512 |                   | establishment of protein localization to endoplasmic reticulum      | 0.616151131409591 |  |  |
| GO:0006413 | 22     | 152       | 3.42392842556969e-25 | 38.8602977667494 |                   | translational initiation                                            | 0.883537471455263 |  |  |
| GO:0006401 | 24     | 205       | 3.43348159778401e-25 | 31.3502762430939 |                   | RNA catabolic process                                               | 1.19161303716006  |  |  |
| GO:0070972 | 118    | protein   | 2.26075563861961e-24 | 45.500637755102  | 0.685904089682375 | localization to endoplasmic reticulum                               | 20                |  |  |
| GO:0019080 | 20     | 151       | 4.02539928104472e-22 | 33.9599236641221 |                   | viral genome expression                                             | 0.877724724932531 |  |  |
| GO:0019083 | 20     | 151       | 4.02539928104472e-22 | 33.9599236641221 |                   | viral transcription                                                 | 0.877724724932531 |  |  |
| GO:0006612 | 20     | 153       | 5.28706381099446e-22 | 33.4445488721804 |                   | protein targeting to membrane                                       | 0.889350217977995 |  |  |
| GO:0043624 | 20     | 153       | 5.28706381099446e-22 | 33.4445488721804 |                   | cellular protein complex disassembly                                | 0.889350217977995 |  |  |
| GO:0043241 | 20     | 158       | 1.02780258194451e-21 | 32.2214673913044 |                   | protein complex disassembly                                         | 0.918413950591655 |  |  |
| GO:0034623 | 20     | 174       | 7.45176687104006e-21 | 28.8413149350649 |                   | cellular macromolecular complex disassembly                         | 1.01141789495537  |  |  |
| GO:0032984 | 20     | 179       | 1.32853705363753e-20 | 27.9245283018868 |                   | macromolecular complex disassembly                                  | 1.04048162756903  |  |  |
| GO:0072594 | 20     | 204       | 1.87577859497437e-19 | 24.0879755434783 |                   | establishment of protein localization to organelle                  | 1.18580029063733  |  |  |
| GO:0019058 | 20     | 231       | 2.25399144564704e-18 | 20.9656398104265 |                   | viral infectious cycle                                              | 1.34274444675109  |  |  |
| GO:0022415 | 260    | viral     | 2.33499315247846e-17 | 18.39453125      | 1.51131409591032  | reproductive process                                                | 20                |  |  |
| GO:0071845 | 20     | 284       | 1.31406163340573e-16 | 16.6938920454545 |                   | cellular component disassembly at cellular level                    | 1.65082001245589  |  |  |
| GO:0022411 | 20     | 288       | 1.72529628947621e-16 | 16.4400652985075 |                   | cellular component disassembly                                      | 1.67407099854681  |  |  |
| GO:0033365 | 21     | 473       | 2.03779779665013e-13 | 10.2617994100295 |                   | protein localization to organelle                                   | 2.74942910525223  |  |  |
| GO:0006605 | 21     | 474       | 2.12314580931642e-13 | 10.2384105960265 |                   | protein targeting                                                   | 2.75524185177496  |  |  |
| GO:0016032 | 20     | 451       | 8.60047376795442e-13 | 10.1044083526682 |                   | viral reproduction                                                  | 2.62154868175213  |  |  |
| GO:0071843 | 10     | 239       | 1.19950273911573e-06 | 8.34297179275345 |                   | cellular component biogenesis at cellular level                     | 1.38924641893295  |  |  |
| GO:0006364 | 7      | 104       | 2.34541989196471e-06 | 13.3739456419869 |                   | rRNA processing                                                     | 0.604525638364127 |  |  |
| GO:0042254 | 8      | 149       | 2.37935104935418e-06 | 10.6203807390817 |                   | ribosome biogenesis                                                 | 0.866099231887067 |  |  |
| GO:0016072 |        |           | 3.41632890821383e-06 | 12.5895851721094 |                   |                                                                     | 0.639402117500519 |  |  |

Stable4\_20PerPair

| GO ID                                                                    | Term   | Count                                | Size                                            | Term                                                        |
|--------------------------------------------------------------------------|--------|--------------------------------------|-------------------------------------------------|-------------------------------------------------------------|
| 7                                                                        | 110    | rRNA metabolic process               |                                                 |                                                             |
| GO:0022613                                                               | 225    | ribonucleoprotein complex biogenesis | 7.86166666666667                                | 1.3078679676147 9                                           |
| Tissue: Skin_Sun_Exposed_Lower_leg=>Adipose_Subcutaneous                 |        |                                      |                                                 |                                                             |
| SourceGene: RP11-275F13.1(ENSG00000261664.1)                             |        |                                      |                                                 |                                                             |
| TargetGeneSet: MRPL20 LRRC47 CNKSR1 SNHG12 SNRNP40 SFPQ GNL2 EBNA1BP2    |        |                                      |                                                 |                                                             |
| DPH2 MAGOH TMEM48 ZZZ3 WDR3 SF3B4 GPATCH4 PRCC METTL13 DHX9              |        |                                      |                                                 |                                                             |
| RBBP5 RRP15 COG2 HEATR1 TRMT61B WDR43 TTC27 GEMIN6 PNPT1 MPHOSPH10       |        |                                      |                                                 |                                                             |
| POLR1A PTCO3 ANAPC1 POLR1B DDX18 MKI67IP SPPL2B FASTKD2 RNF25 ACCL3 CLN5 |        |                                      |                                                 |                                                             |
| TATDN2 HHATL-AS1 SACM1L VPRBP RRP9 PDE12 SHQ1 ZBTB11 QTRTD1              |        |                                      |                                                 |                                                             |
| STAG1 ATR EIF2B5 ECE2 PSMD2 LSG1 NCBP2-AS1 CTBP1-AS1                     |        |                                      |                                                 |                                                             |
| NOP14 GRPEL1 METTL19 BST1 HRH2 PDS5A UTP3 SDAD1 NAA15 PLRG1              |        |                                      |                                                 |                                                             |
| NSUN2 MTRR SLC30A5 CTD HSPA4 HSPA9 HARS TCOF1 G3BP1 RIOK1                |        |                                      |                                                 |                                                             |
| PAK1IP1 BRD2 WDR46 FTSJD2 RPL7L1 POLR1C XPO5 MTO1 SYNCRIP AMD1           |        |                                      |                                                 |                                                             |
| HDDC2 HBS1L TCP1 EIF3B DDX56 CCT6A TBL2 EIF4H SRRT NAPEPLD PUS7          |        |                                      |                                                 |                                                             |
| ZC3HC1 ABCF2 UBE3C KIAA1967 ELP3 MAK16 TGS1 NSMAF C8orf38 POP1           |        |                                      |                                                 |                                                             |
| BOP1 MTAP NOL6 IARS C9orf102 TEX10 PRPF4 ZNF79 TRUB2                     |        |                                      |                                                 |                                                             |
| FUBP3 EXOSC2 SURF6 SURF2 C9orf69 SDCCAG3 FAM208B SEPHS1 PDSS1 BMS1       |        |                                      |                                                 |                                                             |
| ZNF239 CSTF2T SEC24C NDST2 RRP12 WNT8B C10orf2 NOLC1 PDCD11 EIF6         |        |                                      |                                                 |                                                             |
| SEC23IP C10orf137 PHRF1 CAR5 NUP98 CTR9 IMMP1L API5 BTBD18               |        |                                      |                                                 |                                                             |
| PRPF19 WDR74 SF1 NARS2 DDX10 ZNF202 NOP2 PPHLN1 DDX23 BCDIN3D RP3        |        |                                      |                                                 |                                                             |
| PA2G4 RP11 CYP27B1 CAND1 CCT2 UTP20 POLR3B SART3 ANAPC7 DDX55            |        |                                      |                                                 |                                                             |
| DHX37 PUS1 DDX51 NOC4L POLE SACS COG3 ZC3H13 IPO5 CARAKD                 |        |                                      |                                                 |                                                             |
| SUPT16H PRMT5 SGPP1 DCAF4 TRIP11 NIPA2 UBE3A SPATA5L1 CORO2B             |        |                                      |                                                 |                                                             |
| IDH3A AEN TBL3 RNPS1 USP7 GSPT1 CD2BP2 RNF40 DNAJA2 CTCF                 |        |                                      |                                                 |                                                             |
| DDX19A ADAT1 ZC3H18 CTU2 ZNF778 METTL16 MYBBP1A PELP1 DHX33 NEURL4 PFAS  |        |                                      |                                                 |                                                             |
| UTP6 AATF MED1 PSME3 KPNB1 MRPL27 SRSF1 FTSJ3 NOL11 TMEM104              |        |                                      |                                                 |                                                             |
| CCDC137 AFG3L2 TIMM21 SH2D3A DNMT1 ILF3 TNPO2 GATAD2A FBL PSMC4          |        |                                      |                                                 |                                                             |
| ZNF576 CD3EAP DHX34 GRWD1 PPP6R1 U2AF2 TRIM28 PSMF1 TRMT6 SNX5           |        |                                      |                                                 |                                                             |
| ACTR5 ZNF335 NCOA5 TP53RK DDX27 WDR4 RRP1 PWP2 PES1 ANKRD54              |        |                                      |                                                 |                                                             |
| POLDIP3 PQBP1 SMC1A FAM123B UTP14A DKC1                                  |        |                                      |                                                 |                                                             |
| GOBPID                                                                   | Pvalue | OddsRatio                            | ExpCount                                        | Count Size Term                                             |
| GO:0034660                                                               | 46     | 285                                  | ncRNA metabolic process                         | 6.64716275994768e-35 16.1339413223762 4.20074735312435      |
| GO:0071843                                                               | 41     | 239                                  | cellular component biogenesis at cellular level | 3.44265036636425e-32 16.9027484143763 3.52273199086568      |
| GO:0022613                                                               | 46     | 225                                  | ribonucleoprotein complex biogenesis            | 4.84449512488626e-32 17.563505702234 3.3163794893087 40 225 |
| GO:0034470                                                               | 37     | 200                                  | ncRNA processing                                | 2.60824130366708e-30 18.1530605131065 2.94789287938551      |
| GO:0042254                                                               | 149    | 199                                  | ribosome biogenesis                             | 1.89943549524489e-28 21.3378665533362 2.1961801951422 32    |
| GO:0016072                                                               | 25     | 110                                  | rRNA metabolic process                          | 4.76998324008044e-23 22.1417396745932 1.62134108366203      |
| GO:0006364                                                               | 24     | 104                                  | rRNA processing                                 | 2.46624558935442e-22 22.4730158730159 1.53290429728046      |
| GO:0006399                                                               | 17     | 125                                  | tRNA metabolic process                          | 3.79284321596101e-12 11.3477891156463 1.84243304961594      |
| GO:0000375                                                               | 20     | 209                                  | RNA splicing, via transesterification reactions | 3.38084290262527e-11 7.70293609671848 3.08054805895786      |
| GO:0008033                                                               | 77     | 137                                  | tRNA processing                                 | 8.60588814778553e-11 14.39546875 1.13493875856342 13        |
| GO:0000377                                                               | 19     | 204                                  | adenosine as nucleophile                        | 1.71320003984959e-10 7.43959320144887 3.00685073697322      |
| GO:0000398                                                               | 19     | 204                                  | nuclear mRNA splicing, via spliceosome          | 1.71320003984959e-10 7.43959320144887 3.00685073697322      |
| GO:0006397                                                               | 26     | 399                                  | mRNA processing                                 | 2.0163848756993e-10 5.16824131553669 5.88104629437409       |
| GO:0009451                                                               | 11     | 53                                   | RNA modification                                | 2.44197917782365e-10 18.4059405940594 0.78119161303716      |
| GO:0008380                                                               | 323    | 137                                  | RNA splicing                                    | 2.42218096615917e-09 5.33325216120784 4.7608470002076 22    |

Stable4\_20PerPair

|                                                          |                                                                     |                  |                    |
|----------------------------------------------------------|---------------------------------------------------------------------|------------------|--------------------|
| GO:0022618                                               | 1.45642237428395e-07                                                | 9.17574257425743 | 1.40024911770812   |
| 11 95                                                    | ribonucleoprotein complex assembly                                  |                  |                    |
| GO:0043414                                               | 1.67088938757195e-07                                                | 7.95944804280484 | 1.73925679883745   |
| 12 118                                                   | macromolecule methylation                                           |                  |                    |
| GO:0071826                                               | 2.47709169935886e-07                                                | 8.65719212370675 | 1.47394643969275   |
| 11 100                                                   | ribonucleoprotein complex subunit organization                      |                  |                    |
| GO:0032259                                               | 5.25396601047119e-07                                                | 7.08340649692713 | 1.93086983599751   |
| 12 131                                                   | methylation                                                         |                  |                    |
| GO:0001510                                               | 7.75989745425052e-07                                                | 42.7584134615385 | 0.191613037160058  |
| 5 13                                                     | RNA methylation                                                     |                  |                    |
| GO:0006400                                               | 4.86431283957643e-06                                                | 26.303624260355  | 0.265310359144696  |
| 18                                                       | tRNA modification                                                   |                  | 5                  |
| GO:0000966                                               | 1.24937860070488e-05                                                | 203.385714285714 | 0.0589578575877102 |
| 3 4                                                      | RNA 5'-end processing                                               |                  |                    |
| Tissue: Skin_Sun_Exposed_Lower_leg=>Adipose_Subcutaneous |                                                                     |                  | Type: asymmetric   |
| SourceGene:                                              | RP11-485G7.4(ENSG00000263179.1)                                     |                  |                    |
| TargetGeneSet:                                           | SLC2A5 NMNAT1 ARID1A MEAF6 RPS8 RPL5 RP11 KCNA2 RPS7                |                  |                    |
| ASXL2 PPP1CB                                             | RGPD5 RPL15 NICN1 RPL29 ATXN7 PCNP RPL24 RYK                        |                  |                    |
| EIF2B5-IT1                                               | RELL1 LRBA ACSL1 AFF4 CTB RPL15P3 NKAPL WDR11                       |                  |                    |
| ABRACL ARID1B                                            | SLC29A4 EEF1A1P6 RPS3AP26 TRBV6-5 CTD RP1 ASPH                      |                  |                    |
| EIF3E EIF3H                                              | VPS28 RPS6 NIPSNAP3A RPL7A RPS24 FAS RBP4 SCD                       |                  |                    |
| CARS-AS1                                                 | C11orf2 RSF1 GUCY1A2 MCERS1 NACA NAP1L1 RPL18AP3 RPL6               |                  |                    |
| RPSAP54 STARD13                                          | DGKH SNX6 PYGL CCNDBP1 RAB11A PIAS1 FANCA MIR762                    |                  |                    |
| RPL26 SUPT6H                                             | RPL19 NMT1 MED13 BPTF AANAT FASN MYL12B C18orf32                    |                  |                    |
| C19orf80                                                 | HNRNPA1P10 UBA52 RPS5 ID1 PHF20 CHD6 RPL12P4 CTA                    |                  |                    |
| EIF3L LMF2                                               | KDM5C-IT1 BCORL1 RPL10                                              |                  |                    |
| GOBPID Pvalue                                            | OddsRatio                                                           | ExpCount         | Count Size Term    |
| GO:0006413                                               | 9.66275195319599e-21                                                | 37.5276558384548 | 0.725762922981109  |
| 18 152                                                   | translational initiation                                            |                  |                    |
| GO:0006415                                               | 1.25185366783809e-19                                                | 52.2880116959064 | 0.434502802574216  |
| 15 91                                                    | translational termination                                           |                  |                    |
| GO:0000184                                               | 2.09983507836892e-19                                                | 41.8508884411064 | 0.568195972597052  |
| 16 119                                                   | nuclear-transcribed mRNA catabolic process, nonsense-mediated decay |                  |                    |
| GO:0019080                                               | 3.15294642759193e-19                                                | 34.7611940298507 | 0.720988166908864  |
| 17 151                                                   | viral genome expression                                             |                  |                    |
| GO:0019083                                               | 3.15294642759193e-19                                                | 34.7611940298507 | 0.720988166908864  |
| 17 151                                                   | viral transcription                                                 |                  |                    |
| GO:0006414                                               | 1.2094858532895e-18                                                 | 44.1111111111111 | 0.501349387585634  |
| 15 105                                                   | translational elongation                                            |                  |                    |
| GO:0006614                                               | 1.2094858532895e-18                                                 | 44.1111111111111 | 0.501349387585634  |
| 15 105                                                   | SRP-dependent cotranslational protein targeting to membrane         |                  |                    |
| GO:0006613                                               | 1.40388819777656e-18                                                | 43.6233211233211 | 0.506124143657878  |
| 15 106                                                   | cotranslational protein targeting to membrane                       |                  |                    |
| GO:0045047                                               | 1.40388819777656e-18                                                | 43.6233211233211 | 0.506124143657878  |
| 15 106                                                   | protein targeting to ER                                             |                  |                    |
| GO:0072599                                               | 1.40388819777656e-18                                                | 43.6233211233211 | 0.506124143657878  |
| 15 106                                                   | establishment of protein localization to endoplasmic reticulum      |                  |                    |
| GO:0070972                                               | 7.50797766173008e-18                                                | 38.5086299892125 | 0.563421216524808  |
| 15 118                                                   | protein localization to endoplasmic reticulum                       |                  |                    |
| GO:0019058                                               | 1.99765200688039e-17                                                | 23.4780447390224 | 1.1029686526884    |
| 231                                                      | viral infectious cycle                                              |                  | 18                 |
| GO:0000956                                               | 6.66778953631612e-17                                                | 28.0754716981132 | 0.806933776209259  |
| 16 169                                                   | nuclear-transcribed mRNA catabolic process                          |                  |                    |
| GO:0034623                                               | 1.06767194586507e-16                                                | 27.1774540243611 | 0.83080755657048   |
| 16 174                                                   | cellular macromolecular complex disassembly                         |                  |                    |
| GO:0006402                                               | 1.53978141557745e-16                                                | 26.4989517819706 | 0.849906580859456  |
| 16 178                                                   | mRNA catabolic process                                              |                  |                    |
| GO:0022415                                               | 1.64417781157647e-16                                                | 20.6222654350997 | 1.24143657878348   |
| 18 260                                                   | viral reproductive process                                          |                  |                    |
| GO:0032984                                               | 1.68503184580419e-16                                                | 26.3345294594282 | 0.8546813369317    |
| 179                                                      | macromolecular complex disassembly                                  |                  | 16                 |
| GO:0006612                                               | 4.06752141945652e-16                                                | 28.6714975845411 | 0.730537679053353  |
| 15 153                                                   | protein targeting to membrane                                       |                  |                    |

Stable4\_20PerPair

|                                                                     |                                                       |                                                    |                    |      |                                                                     |  |  |  |  |
|---------------------------------------------------------------------|-------------------------------------------------------|----------------------------------------------------|--------------------|------|---------------------------------------------------------------------|--|--|--|--|
| GO:0043624                                                          | 4.06752141945652e-16                                  | 28.6714975845411                                   | 0.730537679053353  |      |                                                                     |  |  |  |  |
| 15                                                                  | 153                                                   | cellular protein complex disassembly               |                    |      |                                                                     |  |  |  |  |
| GO:0043241                                                          | 6.62512402719812e-16                                  | 27.6592851592852                                   | 0.754411459414573  |      |                                                                     |  |  |  |  |
| 15                                                                  | 158                                                   | protein complex disassembly                        |                    |      |                                                                     |  |  |  |  |
| GO:0006401                                                          | 1.47441449051459e-15                                  | 22.670260557053                                    | 0.978824994810048  | 16   |                                                                     |  |  |  |  |
| 205                                                                 | RNA catabolic process                                 |                                                    |                    |      |                                                                     |  |  |  |  |
| GO:0072594                                                          | 3.04689059812065e-14                                  | 20.8597883597884                                   | 0.974050238737804  |      |                                                                     |  |  |  |  |
| 15                                                                  | 204                                                   | establishment of protein localization to organelle |                    |      |                                                                     |  |  |  |  |
| GO:0016032                                                          | 1.85494133300682e-13                                  | 12.2708333333333                                   | 2.15341498858211   |      |                                                                     |  |  |  |  |
| 19                                                                  | 451                                                   | viral reproduction                                 |                    |      |                                                                     |  |  |  |  |
| GO:0071845                                                          | 2.43996182693504e-13                                  | 15.8986201070121                                   | 1.35603072451733   |      |                                                                     |  |  |  |  |
| 16                                                                  | 284                                                   | cellular component disassembly at cellular level   |                    |      |                                                                     |  |  |  |  |
| GO:0022411                                                          | 3.02770833846076e-13                                  | 15.6603773584906                                   | 1.37512974880631   |      |                                                                     |  |  |  |  |
| 16                                                                  | 288                                                   | cellular component disassembly                     |                    |      |                                                                     |  |  |  |  |
| GO:0033365                                                          | 5.22368641413717e-10                                  | 9.19862928863383                                   | 2.25845962217148   |      |                                                                     |  |  |  |  |
| 16                                                                  | 473                                                   | protein localization to organelle                  |                    |      |                                                                     |  |  |  |  |
| GO:0006605                                                          | 5.38703733188493e-10                                  | 9.17788580374063                                   | 2.26323437824372   |      |                                                                     |  |  |  |  |
| 16                                                                  | 474                                                   | protein targeting                                  |                    |      |                                                                     |  |  |  |  |
| GO:0042274                                                          | 1.38476537020871e-06                                  | 63.156043956044                                    | 0.0859456093003944 | 4    |                                                                     |  |  |  |  |
| 18                                                                  | ribosomal small subunit biogenesis                    |                                                    |                    |      |                                                                     |  |  |  |  |
| GO:0016568                                                          | 4.28761626116254e-06                                  | 6.49568965517241                                   | 2.00062279427029   |      |                                                                     |  |  |  |  |
| 11                                                                  | 419                                                   | chromatin modification                             |                    |      |                                                                     |  |  |  |  |
| GO:0006338                                                          | 4.90339324014159e-06                                  | 15.8316722037652                                   | 0.43927755864646   |      |                                                                     |  |  |  |  |
| 6                                                                   | 92                                                    | chromatin remodeling                               |                    |      |                                                                     |  |  |  |  |
| GO:0042254                                                          | 6.79928077522267e-06                                  | 11.3221263062244                                   | 0.711438654764376  |      |                                                                     |  |  |  |  |
| 7                                                                   | 149                                                   | ribosome biogenesis                                |                    |      |                                                                     |  |  |  |  |
| GO:0006364                                                          | 9.97651998625834e-06                                  | 13.8814382896016                                   | 0.49657463151339   |      |                                                                     |  |  |  |  |
| 6                                                                   | 104                                                   | rRNA processing                                    |                    |      |                                                                     |  |  |  |  |
| GO:0022613                                                          | 1.12667152753571e-05                                  | 8.56085215683312                                   | 1.07432011625493   |      |                                                                     |  |  |  |  |
| 8                                                                   | 225                                                   | ribonucleoprotein complex biogenesis               |                    |      |                                                                     |  |  |  |  |
| GO:0016072                                                          | 1.37700397185243e-05                                  | 13.0750915750916                                   | 0.525223167946855  |      |                                                                     |  |  |  |  |
| 6                                                                   | 110                                                   | rRNA metabolic process                             |                    |      |                                                                     |  |  |  |  |
| GO:0071843                                                          | 1.74514667624435e-05                                  | 8.03406429635938                                   | 1.14116670126635   |      |                                                                     |  |  |  |  |
| 8                                                                   | 239                                                   | cellular component biogenesis at cellular level    |                    |      |                                                                     |  |  |  |  |
| Tissue: Skin_Sun_Exposed_Lower_leg=>Adipose_Subcutaneous            |                                                       |                                                    | Type: asymmetric   |      |                                                                     |  |  |  |  |
| SourceGene:                                                         | RP11-930O11.1(ENSG00000259719.1)                      |                                                    |                    |      |                                                                     |  |  |  |  |
| TargetGeneSet:                                                      | VPS13D SPEN UBR4 KPNA7 HIPK1 ASH1L PRRC2C LPGAT1 PXDN |                                                    |                    |      |                                                                     |  |  |  |  |
| RPS7 ASXL2 MZT2B USP37 USP40 RPL15 RPL29 DNAH1 CD38 TLR2 TBCA       |                                                       |                                                    |                    |      |                                                                     |  |  |  |  |
| AFF4 RPS14 TNIP1 RP11 AGXT2L2 RPL15P3 GPLD1 TAPBP BRD7P4 MRPS12     |                                                       |                                                    |                    |      |                                                                     |  |  |  |  |
| MYO1G GS1 CACNA2D1 VPS13B EIF3H TATDN1 CTA RPL8 VPS13A              |                                                       |                                                    |                    |      |                                                                     |  |  |  |  |
| RPS24 RPL27A RPS13 PACS1 ARID2 NACA SUGT1 VPS13C SEC11A ZNF205 SMG1 |                                                       |                                                    |                    |      |                                                                     |  |  |  |  |
| RPL13 VPS53 RPL26 RPS7P1 RPL17 STAT5B RPL27 HOXB7 RPS15 PTPRS RYR1  |                                                       |                                                    |                    |      |                                                                     |  |  |  |  |
| PLAUR RPL18 ZNF587 RALGAPB RPL12P4 CRYBB2 EIF3L EGFL6 HUWE1         |                                                       |                                                    |                    |      |                                                                     |  |  |  |  |
| GOBPID Pvalue                                                       | OddsRatio                                             | ExpCount                                           | Count              | Size | Term                                                                |  |  |  |  |
| GO:0006614                                                          | 1.57744928897971e-19                                  | 51.8115942028985                                   | 0.443221922358314  |      | SRP-dependent cotranslational protein targeting to membrane         |  |  |  |  |
| 15                                                                  | 105                                                   |                                                    |                    |      |                                                                     |  |  |  |  |
| GO:0006613                                                          | 1.83195288190393e-19                                  | 51.2386526516961                                   | 0.447443083523632  |      | cotranslational protein targeting to membrane                       |  |  |  |  |
| 15                                                                  | 106                                                   |                                                    |                    |      |                                                                     |  |  |  |  |
| GO:0045047                                                          | 1.83195288190393e-19                                  | 51.2386526516961                                   | 0.447443083523632  |      | protein targeting to ER                                             |  |  |  |  |
| 15                                                                  | 106                                                   |                                                    |                    |      |                                                                     |  |  |  |  |
| GO:0072599                                                          | 1.83195288190393e-19                                  | 51.2386526516961                                   | 0.447443083523632  |      | establishment of protein localization to endoplasmic reticulum      |  |  |  |  |
| 15                                                                  | 106                                                   |                                                    |                    |      |                                                                     |  |  |  |  |
| GO:0006415                                                          | 9.63146860465796e-19                                  | 55.3694390715667                                   | 0.384125666043872  |      | translational termination                                           |  |  |  |  |
| 14                                                                  | 91                                                    |                                                    |                    |      |                                                                     |  |  |  |  |
| GO:0070972                                                          | 9.8589662000356e-19                                   | 45.2311101730688                                   | 0.498097017507439  |      | protein localization to endoplasmic reticulum                       |  |  |  |  |
| 15                                                                  | 118                                                   |                                                    |                    |      |                                                                     |  |  |  |  |
| GO:0000184                                                          | 1.12470471296061e-18                                  | 44.7930602006689                                   | 0.502318178672756  |      | nuclear-transcribed mRNA catabolic process, nonsense-mediated decay |  |  |  |  |
| 15                                                                  | 119                                                   |                                                    |                    |      |                                                                     |  |  |  |  |
| GO:0006413                                                          | 1.35662886591628e-18                                  | 37.2653594771242                                   | 0.641616497128226  |      | translational initiation                                            |  |  |  |  |
| 16                                                                  | 152                                                   |                                                    |                    |      |                                                                     |  |  |  |  |
| GO:0006612                                                          | 1.51058855663393e-18                                  | 36.9907542579075                                   | 0.645837658293544  |      | protein targeting to membrane                                       |  |  |  |  |
| 16                                                                  | 153                                                   |                                                    |                    |      |                                                                     |  |  |  |  |
| GO:0006414                                                          | 7.92606098015508e-18                                  | 46.8052373158756                                   | 0.443221922358314  |      |                                                                     |  |  |  |  |

Stable4\_20PerPair

|                 |         |                                                                |                  |                   |      |                   |  |                   |      |
|-----------------|---------|----------------------------------------------------------------|------------------|-------------------|------|-------------------|--|-------------------|------|
| 14              | 105     | translational elongation                                       |                  |                   |      |                   |  |                   |      |
| GO:0072594      |         | 1.59606545339533e-16                                           | 26.8595744680851 |                   |      |                   |  | 0.861116877724725 |      |
| 16              | 204     | establishment of protein localization to organelle             |                  |                   |      |                   |  |                   |      |
| GO:0000956      |         | 2.46953791183705e-16                                           | 30.1439864483343 |                   |      |                   |  | 0.71337623693862  |      |
| 15              | 169     | nuclear-transcribed mRNA catabolic process                     |                  |                   |      |                   |  |                   |      |
| GO:0034623      |         | 3.83904766757613e-16                                           | 29.1858080393765 |                   |      |                   |  | 0.734482042765207 |      |
| 15              | 174     | cellular macromolecular complex disassembly                    |                  |                   |      |                   |  |                   |      |
| GO:0006402      |         | 5.41099421018376e-16                                           | 28.4615897572686 |                   |      |                   |  | 0.751366687426476 |      |
| 15              | 178     | mRNA catabolic process                                         |                  |                   |      |                   |  |                   |      |
| GO:0032984      |         | 5.8881056306774e-16                                            | 28.2860551431601 |                   |      |                   |  | 0.755587848591793 |      |
| 15              | 179     | macromolecular complex disassembly                             |                  |                   |      |                   |  |                   |      |
| GO:0019080      |         | 1.48143871610431e-15                                           | 30.9895946575555 |                   |      |                   |  | 0.637395335962909 |      |
| 14              | 151     | viral genome expression                                        |                  |                   |      |                   |  |                   |      |
| GO:0019083      |         | 1.48143871610431e-15                                           | 30.9895946575555 |                   |      |                   |  | 0.637395335962909 |      |
| 14              | 151     | viral transcription                                            |                  |                   |      |                   |  |                   |      |
| GO:0043624      |         | 1.78510167785488e-15                                           | 30.5394152762896 |                   |      |                   |  | 0.645837658293544 |      |
| 14              | 153     | cellular protein complex disassembly                           |                  |                   |      |                   |  |                   |      |
| GO:0043241      |         | 2.81324041445762e-15                                           | 29.4686761229314 |                   |      |                   |  | 0.66694346412013  |      |
| 14              | 158     | protein complex disassembly                                    |                  |                   |      |                   |  |                   |      |
| GO:0006401      |         | 4.50225390318053e-15                                           | 24.370709382151  | 0.865338038890042 |      |                   |  |                   | 15   |
| 205             | RNA     | catabolic process                                              |                  |                   |      |                   |  |                   |      |
| GO:0019058      |         | 2.65071596581026e-14                                           | 21.3979468599034 |                   |      |                   |  | 0.975088229188292 |      |
| 15              | 231     | viral infectious cycle                                         |                  |                   |      |                   |  |                   |      |
| GO:0022415      |         | 1.50858042305001e-13                                           | 18.8265306122449 |                   |      |                   |  | 1.09750190298249  |      |
| 15              | 260     | viral reproductive process                                     |                  |                   |      |                   |  |                   |      |
| GO:0033365      |         | 4.8279469174266e-13                                            | 12.8203424482494 |                   |      |                   |  | 1.99660923119507  |      |
| 18              | 473     | protein localization to organelle                              |                  |                   |      |                   |  |                   |      |
| GO:0006605      |         | 5.00398053106689e-13                                           | 12.7913096695226 |                   |      |                   |  | 2.00083039236039  |      |
| 18              | 474     | protein targeting                                              |                  |                   |      |                   |  |                   |      |
| GO:0071845      |         | 5.46390082962498e-13                                           | 17.1177468886375 |                   |      |                   |  | 1.19880977095011  |      |
| 15              | 284     | cellular component disassembly at cellular level               |                  |                   |      |                   |  |                   |      |
| GO:0022411      |         | 6.69346400676617e-13                                           | 16.8621595795509 |                   |      |                   |  | 1.21569441561138  |      |
| 15              | 288     | cellular component disassembly                                 |                  |                   |      |                   |  |                   |      |
| GO:0016032      |         | 3.47090805340659e-11                                           | 11.4063856960409 |                   |      |                   |  | 1.90374368555809  |      |
| 16              | 451     | viral reproduction                                             |                  |                   |      |                   |  |                   |      |
| GO:0042274      |         | 8.41122338662158e-07                                           | 72.0601503759399 |                   |      |                   |  | 0.075980900975711 |      |
| 4               | 18      | ribosomal small subunit biogenesis                             |                  |                   |      |                   |  |                   |      |
| Tissue: Adipose |         | Subcutaneous=>Skin_Sun_Exposed_Lower_leg                       |                  |                   |      |                   |  | Type: cluster     |      |
| SourceGene:     |         | RPL7P57(ENSG00000224401.2)                                     |                  |                   |      |                   |  |                   |      |
| TargetGeneSet:  |         | RP11 EIF1AX RPL11 RP4 RPS8 UQCRH PRPF38A BCAS2                 |                  |                   |      |                   |  |                   |      |
| PAQR6           | SNRPE   | SH3YL1 RPS7 UBC SNRPG COA5 RPL31 MRPS9 SSB                     |                  |                   |      |                   |  |                   |      |
| WDR75           | EEF1B2  | RPL37A CRBN THUMPD3 RPL32 CMC1 CCDC72 PRKAR2A-AS1              |                  |                   |      |                   |  |                   |      |
| THOC7           | CCDC58  | RPL35A RPL34 EEF1A1P19 RAD17 NSA2 RPS23 COX7C                  |                  |                   |      |                   |  |                   |      |
| LYRM7           | SLU7    | NPM1 TDP2 BRD2 RPL10A RPL39P3 EEF1A1 C6orf203                  |                  |                   |      |                   |  |                   |      |
| MRPS12          | ZDHHC14 | LSM5 YAE1D1 SEC61G RPS20 UQCRB TATDN1 C9orf123                 |                  |                   |      |                   |  |                   | RPS6 |
| NDUFB6          | CHMP5   | RBM18 TSC1 RPS24 RPL13AP5 C11orf58 EIF3M FAU                   |                  |                   |      |                   |  |                   |      |
| CLNS1A          | TMEM123 | RPS25 NACA RPL14P1 C12orf45 RPL6 CCNA1 EBPL                    |                  |                   |      |                   |  |                   |      |
| COMMD6          | PLDN    | RSL24D1 RPS3AP6 NEIL1 BTBD1 UNKL RPAIN RPL26 RPS7P1            |                  |                   |      |                   |  |                   |      |
| RPL17           | RPL19   | RPL27 KPNA2 RPL38 R1OK3 C18orf8 LSM7 ALKBH6 ZNF829             |                  |                   |      |                   |  |                   |      |
| RPS16           | RPS19   | SNRPD2 RPS21 EEF1B2P3 VBP1                                     |                  |                   |      |                   |  |                   |      |
| GOBPID          | Pvalue  | OddsRatio                                                      | ExpCount         | Count             | Size | Term              |  |                   |      |
| GO:0006414      |         | 2.76353115943587e-40                                           | 107.608695652174 |                   |      | 0.530413120199294 |  |                   |      |
| 27              | 105     | translational elongation                                       |                  |                   |      |                   |  |                   |      |
| GO:0006614      |         | 2.87558700282201e-38                                           | 100.127659574468 |                   |      | 0.530413120199294 |  |                   |      |
| 26              | 105     | SRP-dependent cotranslational protein targeting to membrane    |                  |                   |      |                   |  |                   |      |
| GO:0006613      |         | 3.79813892675077e-38                                           | 98.8691489361702 |                   |      | 0.535464673725002 |  |                   |      |
| 26              | 106     | cotranslational protein targeting to membrane                  |                  |                   |      |                   |  |                   |      |
| GO:0045047      |         | 3.79813892675077e-38                                           | 98.8691489361702 |                   |      | 0.535464673725002 |  |                   |      |
| 26              | 106     | protein targeting to ER                                        |                  |                   |      |                   |  |                   |      |
| GO:0072599      |         | 3.79813892675077e-38                                           | 98.8691489361702 |                   |      | 0.535464673725002 |  |                   |      |
| 26              | 106     | establishment of protein localization to endoplasmic reticulum |                  |                   |      |                   |  |                   |      |
| GO:0006415      |         | 4.79075044474379e-38                                           | 112.941919191919 |                   |      | 0.459691370839388 |  |                   |      |
| 25              | 91      | translational termination                                      |                  |                   |      |                   |  |                   |      |

STable4\_20PerPair

|            |                      |                                                                     |                    |    |
|------------|----------------------|---------------------------------------------------------------------|--------------------|----|
| GO:0070972 | 8.59890237110418e-37 | 85.9010175763182                                                    | 0.596083316033493  |    |
| 26         | 118                  | protein localization to endoplasmic reticulum                       |                    |    |
| GO:0006413 | 1.74243825363436e-35 | 66.9271304347826                                                    | 0.76783613590755   |    |
| 27         | 152                  | translational initiation                                            |                    |    |
| GO:0000184 | 9.03601568062273e-35 | 79.1445035460993                                                    | 0.6011348695592    | 25 |
| 119        |                      | nuclear-transcribed mRNA catabolic process, nonsense-mediated decay |                    |    |
| GO:0000956 | 3.75840299789116e-34 | 58.8444580526638                                                    | 0.853712545844578  |    |
| 27         | 169                  | nuclear-transcribed mRNA catabolic process                          |                    |    |
| GO:0006612 | 1.36114060192244e-33 | 62.0750544479812                                                    | 0.772887689433257  |    |
| 26         | 153                  | protein targeting to membrane                                       |                    |    |
| GO:0006402 | 1.66768097955149e-33 | 55.3021883098186                                                    | 0.899176527575946  |    |
| 27         | 178                  | mRNA catabolic process                                              |                    |    |
| GO:0019080 | 5.78130277058681e-32 | 58.912037037037                                                     | 0.762784582381842  | 25 |
| 151        |                      | viral genome expression                                             |                    |    |
| GO:0019083 | 5.78130277058681e-32 | 58.912037037037                                                     | 0.762784582381842  | 25 |
| 151        |                      | viral transcription                                                 |                    |    |
| GO:0043624 | 8.21753702828212e-32 | 57.9833984375                                                       | 0.772887689433257  | 25 |
| 153        |                      | cellular protein complex disassembly                                |                    |    |
| GO:0006401 | 9.24943435355489e-32 | 46.8246213971666                                                    | 1.03556847277005   |    |
| 27         | 205                  | RNA catabolic process                                               |                    |    |
| GO:0043241 | 1.93655810887696e-31 | 55.7839912280702                                                    | 0.798145457061795  |    |
| 25         | 158                  | protein complex disassembly                                         |                    |    |
| GO:0034623 | 2.48953699439478e-30 | 49.7378355704698                                                    | 0.878970313473116  |    |
| 25         | 174                  | cellular macromolecular complex disassembly                         |                    |    |
| GO:0072594 | 3.69737420890115e-30 | 44.1310064546976                                                    | 1.03051691924434   |    |
| 26         | 204                  | establishment of protein localization to organelle                  |                    |    |
| GO:0032984 | 5.245265723562e-30   | 48.1060606060606                                                    | 0.904228081101654  |    |
| 25         | 179                  | macromolecular complex disassembly                                  |                    |    |
| GO:0022415 | 2.4576661809878e-27  | 33.4373522458629                                                    | 1.31340391668397   |    |
| 26         | 260                  | viral reproductive process                                          |                    |    |
| GO:0019058 | 3.92667099875934e-27 | 35.8313106796116                                                    | 1.16690886443845   |    |
| 25         | 231                  | viral infectious cycle                                              |                    |    |
| GO:0071845 | 7.4883102216333e-25  | 28.392454954955                                                     | 1.43464120130095   | 25 |
| 284        |                      | cellular component disassembly at cellular level                    |                    |    |
| GO:0022411 | 1.06497711733202e-24 | 27.9527091254753                                                    | 1.45484741540378   |    |
| 25         | 288                  | cellular component disassembly                                      |                    |    |
| GO:0033365 | 3.74358203733785e-23 | 19.481847690387                                                     | 2.38938481765968   | 28 |
| 473        |                      | protein localization to organelle                                   |                    |    |
| GO:0006605 | 3.96627331353422e-23 | 19.4367713004484                                                    | 2.39443637118538   |    |
| 28         | 474                  | protein targeting                                                   |                    |    |
| GO:0022613 | 7.67232272328643e-23 | 30.1217038539554                                                    | 1.1365995432842    | 22 |
| 225        |                      | ribonucleoprotein complex biogenesis                                |                    |    |
| GO:0071843 | 2.94216983843665e-22 | 28.1505376344086                                                    | 1.20732129264411   |    |
| 22         | 239                  | cellular component biogenesis at cellular level                     |                    |    |
| GO:0016032 | 3.85638659378562e-21 | 18.1616020025031                                                    | 2.27825064009411   |    |
| 26         | 451                  | viral reproduction                                                  |                    |    |
| GO:0042254 | 2.28979588109197e-17 | 30.0646352723915                                                    | 0.752681475330427  |    |
| 16         | 149                  | ribosome biogenesis                                                 |                    |    |
| GO:0042274 | 1.20031454780352e-14 | 176.836923076923                                                    | 0.0909279634627361 |    |
| 8          | 18                   | ribosomal small subunit biogenesis                                  |                    |    |
| GO:0034660 | 4.20576973391884e-14 | 15.9828091684435                                                    | 1.43969275482666   |    |
| 17         | 285                  | ncRNA metabolic process                                             |                    |    |
| GO:0006364 | 1.28620598802652e-13 | 30.5473984319316                                                    | 0.525361566673587  |    |
| 12         | 104                  | rRNA processing                                                     |                    |    |
| GO:0016072 | 2.55627992648516e-13 | 28.6651053864169                                                    | 0.555670887827832  |    |
| 12         | 110                  | rRNA metabolic process                                              |                    |    |
| GO:0034470 | 1.92582378338584e-11 | 16.4423351158645                                                    | 1.01031070514151   |    |
| 13         | 200                  | ncRNA processing                                                    |                    |    |
| GO:0022618 | 1.07038452366635e-09 | 23.3699127906977                                                    | 0.479897584942219  |    |
| 9          | 95                   | ribonucleoprotein complex assembly                                  |                    |    |
| GO:0071826 | 1.69853349330779e-09 | 22.078125                                                           | 0.505155352570756  | 9  |
| 100        |                      | ribonucleoprotein complex subunit organization                      |                    |    |
| GO:0000387 | 4.39079463156449e-07 | 40.5882352941176                                                    | 0.156598159296934  |    |

Stable4\_20PerPair

|                                                          |          |                                                                                          |                  |                  |         |                   |         |                    |        |
|----------------------------------------------------------|----------|------------------------------------------------------------------------------------------|------------------|------------------|---------|-------------------|---------|--------------------|--------|
| 5                                                        | 31       | spliceosomal snRNP assembly                                                              |                  |                  |         |                   |         |                    |        |
| GO:0008380                                               |          | 6.07126667275544e-07                                                                     | 7.99865591397849 |                  |         |                   |         | 1.63165178880354   |        |
| 11                                                       | 323      | RNA splicing                                                                             |                  |                  |         |                   |         |                    |        |
| GO:0000462                                               |          | 2.44679800247836e-06                                                                     | 205.357142857143 |                  |         |                   |         | 0.0303093211542454 |        |
| 3                                                        | 6        | maturation of SSU-rRNA from tricistronic rRNA transcript (SSU-rRNA, 5.8S rRNA, LSU-rRNA) |                  |                  |         |                   |         |                    |        |
| GO:0030490                                               |          | 4.26634606660256e-06                                                                     | 154.007142857143 |                  |         |                   |         | 0.0353608746799529 |        |
| 3                                                        | 7        | maturation of SSU-rRNA                                                                   |                  |                  |         |                   |         |                    |        |
| GO:0006397                                               |          | 4.73643415142512e-06                                                                     | 6.39715663451945 |                  |         |                   |         | 2.01556985675732   |        |
| 11                                                       | 399      | mRNA processing                                                                          |                  |                  |         |                   |         |                    |        |
| GO:0000375                                               |          | 1.0050210757565e-05                                                                      | 8.68090317642556 |                  |         |                   |         | 1.05577468687288   |        |
| 8                                                        | 209      | RNA splicing, via transesterification reactions                                          |                  |                  |         |                   |         |                    |        |
| Tissue: Skin_Sun_Exposed_Lower_leg=>Adipose_Subcutaneous |          |                                                                                          |                  |                  |         |                   |         | Type: asymmetric   |        |
| SourceGene:                                              |          | RPP30(ENSG00000148688.6)                                                                 |                  |                  |         |                   |         |                    |        |
| TargetGeneSet:                                           |          | ZBTB17                                                                                   | KDM1A            | KHDRBS1          | RP4     | EIF2C3            | LEPRE1  | HECTD3             | HSPB11 |
| MRPL37                                                   | LEPROT   | LRRRC40                                                                                  | GNG5             | COL24A1          | RPL5    | CCDC18            | RP11    | KCNJ9              | SNRPE  |
| B3GALNT2                                                 |          | PRORS1P                                                                                  |                  | ETAA1            | FAM136A | UBTFL6            | MMADHC  | MLK7-AS1           |        |
| NIF3L1                                                   | EEF1B2   | TNS1                                                                                     | KCNE4            | RPS12P5          | RPSA    | RPL14             | IMPDH2  | QARS               | NICN1  |
| SPCS1                                                    | SNX4     | COMMD2                                                                                   | EGFEM1P          | EXOC7            | OSTC    | CCDC109B          |         | DCTD               | WWC2   |
| AGGF1P1                                                  | CTD      | CDK7                                                                                     | RASA1            | CTB              | NPM1    | GPLD1             | RPS18   | YIPF3              | EEF1A1 |
| RARS2                                                    | MRPS12   | EPM2A                                                                                    | CTA              | NT5C3            | SSBP1   | GIMAP7            | GIMAP6  | CSDM1              | CCDC25 |
| C8orf34                                                  | DPY19L4  | FAM84B                                                                                   | RPS6             | DCTN3            | HRCT1   | SLC35D2           | GGTA1P  | PSMB7              | GDI2   |
| ITGB1                                                    | RPL13AP5 |                                                                                          | GSTO1            | RNU4-5P          | LHPP    | SNORA23           | ZBED5   | PEX16              | NDUFS3 |
| PPP2R5B                                                  | CCDC82   | MCAM                                                                                     | NTM              | HDAC7            | TUBA1C  | HNRNPA1           | GRIP1   | SLC35E3            | METAP2 |
| SLC25A3                                                  | IKBIP    | NUP37                                                                                    | ALKBH2           | FBXO21           | RPLP0   | RFXAP             | MRPS31  | DGKH               | EBPL   |
| LGALS3                                                   | MOK      | CCNDBP1                                                                                  | PARP16           | RAB11A           | RPS17L  | SEC11A            | RPS2    | LITAF              | MYH10  |
| MPRIP-AS1                                                |          | RPS7P1                                                                                   | ALDOC            | TMEM101          | MAPT    | ANKRD40           | CEP95   | MYOM1              | TTC39C |
| HNRNPA1P7                                                |          | HAUS1                                                                                    | PIP5K1C          | SLC25A23         |         | RNASEH2A          |         | AP1M1              | PDCD5  |
| ZNF585A                                                  | RPS19    | MEGF8                                                                                    | CACNG7           | RPL28            | RPS5    | SLC24A3           | EPB41L1 | WFDC13             | CSTF1  |
| EEF1B2P3                                                 |          | RGN                                                                                      | PORCN            | YIPF6            | RBM41   | RP1-177G6.2       |         | SLC10A3            |        |
| GOBPID                                                   | Pvalue   | OddsRatio                                                                                | ExpCount         | Count            | Size    | Term              |         |                    |        |
| GO:0070972                                               |          | 7.73350920734173e-15                                                                     | 22.5427395525538 |                  |         | 0.873711161857311 |         |                    |        |
| 15                                                       | 118      | protein localization to endoplasmic reticulum                                            |                  |                  |         |                   |         |                    |        |
| GO:0006414                                               |          | 3.26182500051036e-14                                                                     | 23.5781637717122 |                  |         | 0.777454847415404 |         |                    |        |
| 14                                                       | 105      | translational elongation                                                                 |                  |                  |         |                   |         |                    |        |
| GO:0006614                                               |          | 3.26182500051036e-14                                                                     | 23.5781637717122 |                  |         | 0.777454847415404 |         |                    |        |
| 14                                                       | 105      | SRP-dependent cotranslational protein targeting to membrane                              |                  |                  |         |                   |         |                    |        |
| GO:0006613                                               |          | 3.73551811974013e-14                                                                     | 23.3202431042543 |                  |         | 0.78485917929555  |         |                    |        |
| 14                                                       | 106      | cotranslational protein targeting to membrane                                            |                  |                  |         |                   |         |                    |        |
| GO:0045047                                               |          | 3.73551811974013e-14                                                                     | 23.3202431042543 |                  |         | 0.78485917929555  |         |                    |        |
| 14                                                       | 106      | protein targeting to ER                                                                  |                  |                  |         |                   |         |                    |        |
| GO:0072599                                               |          | 3.73551811974013e-14                                                                     | 23.3202431042543 |                  |         | 0.78485917929555  |         |                    |        |
| 14                                                       | 106      | establishment of protein localization to endoplasmic reticulum                           |                  |                  |         |                   |         |                    |        |
| GO:0006612                                               |          | 3.84040546543063e-13                                                                     | 16.7840264650284 |                  |         | 1.13286277766245  |         |                    |        |
| 15                                                       | 153      | protein targeting to membrane                                                            |                  |                  |         |                   |         |                    |        |
| GO:0006415                                               |          | 2.80259329975766e-12                                                                     | 22.8087941372418 |                  |         | 0.67379420109335  |         |                    |        |
| 12                                                       | 91       | translational termination                                                                |                  |                  |         |                   |         |                    |        |
| GO:0072594                                               |          | 2.53373654071825e-11                                                                     | 12.2110075914424 |                  |         | 1.51048370354993  |         |                    |        |
| 15                                                       | 204      | establishment of protein localization to organelle                                       |                  |                  |         |                   |         |                    |        |
| GO:0000184                                               |          | 7.10394135326821e-11                                                                     | 16.8070831283817 |                  |         | 0.881115493737458 |         |                    |        |
| 12                                                       | 119      | nuclear-transcribed mRNA catabolic process, nonsense-mediated decay                      |                  |                  |         |                   |         |                    |        |
| GO:0019080                                               |          | 8.19149411134448e-11                                                                     | 14.2366635831021 |                  |         | 1.11805411390215  |         |                    |        |
| 13                                                       | 151      | viral genome expression                                                                  |                  |                  |         |                   |         |                    |        |
| GO:0019083                                               |          | 8.19149411134448e-11                                                                     | 14.2366635831021 |                  |         | 1.11805411390215  |         |                    |        |
| 13                                                       | 151      | viral transcription                                                                      |                  |                  |         |                   |         |                    |        |
| GO:0006401                                               |          | 3.27041027786169e-10                                                                     | 11.154759894162  | 1.51788803543007 |         |                   |         | 14                 |        |
| 205                                                      |          | RNA catabolic process                                                                    |                  |                  |         |                   |         |                    |        |
| GO:0006402                                               |          | 6.40545495569124e-10                                                                     | 11.8843971631206 |                  |         | 1.31797107466611  |         |                    |        |
| 13                                                       | 178      | mRNA catabolic process                                                                   |                  |                  |         |                   |         |                    |        |
| GO:0006413                                               |          | 1.24446052195603e-09                                                                     | 12.8156390977444 |                  |         | 1.1254584457823   | 12      |                    |        |
| 152                                                      |          | translational initiation                                                                 |                  |                  |         |                   |         |                    |        |
| GO:0043624                                               |          | 1.34214153559714e-09                                                                     | 12.7238521836506 |                  |         | 1.13286277766245  |         |                    |        |
| 12                                                       | 153      | cellular protein complex disassembly                                                     |                  |                  |         |                   |         |                    |        |

Stable4\_20PerPair

|                                                                       |                      |                                                             |                    |
|-----------------------------------------------------------------------|----------------------|-------------------------------------------------------------|--------------------|
| GO:0043241                                                            | 1.94244085203402e-09 | 12.2837779379957                                            | 1.16988443706318   |
| 12                                                                    | 158                  | protein complex disassembly                                 |                    |
| GO:0000956                                                            | 4.1906640972259e-09  | 11.414280925243                                             | 1.25133208774479   |
| 169                                                                   |                      | nuclear-transcribed mRNA catabolic process                  | 12                 |
| GO:0034623                                                            | 5.83519367848991e-09 | 11.058089668616                                             | 1.28835374714553   |
| 174                                                                   |                      | cellular macromolecular complex disassembly                 | 12                 |
| GO:0032984                                                            | 8.03950940262332e-09 | 10.723227229751                                             | 1.32537540654626   |
| 179                                                                   |                      | macromolecular complex disassembly                          | 12                 |
| GO:0019058                                                            | 1.52478347774591e-08 | 8.96144837009565                                            | 1.71040066431389   |
| 13                                                                    | 231                  | viral infectious cycle                                      |                    |
| GO:0071843                                                            | 2.28720374097545e-08 | 8.63933345885897                                            | 1.76963531935506   |
| 13                                                                    | 239                  | cellular component biogenesis at cellular level             |                    |
| GO:0022415                                                            | 6.17921402246615e-08 | 7.89305711086226                                            | 1.92512628883814   |
| 13                                                                    | 260                  | viral reproductive process                                  |                    |
| GO:0022613                                                            | 1.020867276516e-07   | 8.38013343217198                                            | 1.66597467303301   |
| 12                                                                    | 225                  | ribonucleoprotein complex biogenesis                        |                    |
| GO:0042254                                                            | 1.49955979284037e-07 | 10.5354891344656                                            | 1.10324545014186   |
| 10                                                                    | 149                  | ribosome biogenesis                                         |                    |
| GO:0071845                                                            | 1.72617995788958e-07 | 7.18179320091073                                            | 2.10283025396166   |
| 13                                                                    | 284                  | cellular component disassembly at cellular level            |                    |
| GO:0016032                                                            | 1.98402473283091e-07 | 5.62192749778957                                            | 3.33935367794616   |
| 16                                                                    | 451                  | viral reproduction                                          |                    |
| GO:0022411                                                            | 2.02832419521597e-07 | 7.07531914893617                                            | 2.13244758148225   |
| 13                                                                    | 288                  | cellular component disassembly                              |                    |
| GO:0033365                                                            | 2.0184801718855e-06  | 4.94327890639833                                            | 3.50224897930939   |
| 15                                                                    | 473                  | protein localization to organelle                           |                    |
| GO:0006605                                                            | 2.07177738734815e-06 | 4.9321540210287                                             | 3.50965331118954   |
| 474                                                                   |                      | protein targeting                                           | 15                 |
| GO:0042255                                                            | 4.82828383184175e-06 | 46.3818770226537                                            | 0.118469310082347  |
| 4                                                                     | 16                   | ribosome assembly                                           |                    |
| GO:0000028                                                            | 7.76702447065936e-06 | 137.894230769231                                            | 0.0444259912808802 |
| 3                                                                     | 6                    | ribosomal small subunit assembly                            |                    |
| GO:0042274                                                            | 8.02575663301537e-06 | 39.750346740638                                             | 0.133277973842641  |
| 18                                                                    |                      | ribosomal small subunit biogenesis                          | 4                  |
| GO:0006364                                                            | 1.17964469341278e-05 | 10.2813402061856                                            | 0.770050515535257  |
| 7                                                                     | 104                  | rRNA processing                                             |                    |
| GO:0016072                                                            | 1.70406276135602e-05 | 9.67834951456311                                            | 0.814476506816137  |
| 7                                                                     | 110                  | rRNA metabolic process                                      |                    |
| Tissue: Skin_Sun_Exposed_Lower_leg=>Adipose_Subcutaneous              |                      |                                                             | Type: asymmetric   |
| SourceGene: RSPH9(ENSG00000172426.9)                                  |                      |                                                             |                    |
| TargetGeneSet: TNFRSF25 RP1 RP4 COL24A1 PKN2 RPL5 RP11                |                      |                                                             |                    |
| ATP5F1 U2 ADAMTSL4 PIGM KIAA1383 GPR113 UBC TPRKB                     |                      |                                                             |                    |
| MRPS9 RBM43 EEF1B2 QARS GRM2 SPCS1 RPL10AP6 ATG3 GPR171               |                      |                                                             |                    |
| RPL22L1 C3orf43 RPL35A NAAA RPL37 NDUFAF2 PPWD1 BTF3 RPS23 NPM1       |                      |                                                             |                    |
| RPL10A C6orf130 SENP6 RARS2 UFL1 GOPC MRPS12 PKD1L1 ECD POT1          |                      |                                                             |                    |
| SSBP1 ZNF596 CHCHD7 RPL7 C8orf59 RPL30 U6 ZNF250 RPS6 PSMB7 DPM2      |                      |                                                             |                    |
| RPS24 BLOC1S2 ZBED5 IMMP1L EIF3M PEX16 PPP2R5B RPS25 CBX3P4 UHRF1BP1L |                      |                                                             |                    |
| NUP37 RPLP0 ALG5 TPT1 TMTC4 LGALS3 RSL24D1 UNC45A UBE2I LITAF         |                      |                                                             |                    |
| RPL23A RPL19 VPS25 FECH TEAD2 RPS9 DTD1 IFT52 CSTF1 MRPL39            |                      |                                                             |                    |
| REPS2 UXT RPS4X                                                       |                      |                                                             |                    |
| GOBPID Pvalue OddsRatio ExpCount Count Size Term                      |                      |                                                             |                    |
| GO:0070972                                                            | 3.37340022439387e-22 | 45.8903571428571                                            | 0.604248840910664  |
| 18                                                                    | 118                  | protein localization to endoplasmic reticulum               |                    |
| GO:0006612                                                            | 1.22713074263775e-21 | 36.7187245590231                                            | 0.783475192028233  |
| 19                                                                    | 153                  | protein targeting to membrane                               |                    |
| GO:0006414                                                            | 1.85824725656262e-21 | 48.4276315789474                                            | 0.537679053352709  |
| 17                                                                    | 105                  | translational elongation                                    |                    |
| GO:0006614                                                            | 1.85824725656262e-21 | 48.4276315789474                                            | 0.537679053352709  |
| 17                                                                    | 105                  | SRP-dependent cotranslational protein targeting to membrane |                    |
| GO:0006613                                                            | 2.20489973980139e-21 | 47.8801498127341                                            | 0.542799806241783  |
| 17                                                                    | 106                  | cotranslational protein targeting to membrane               |                    |
| GO:0045047                                                            | 2.20489973980139e-21 | 47.8801498127341                                            | 0.542799806241783  |
| 17                                                                    | 106                  | protein targeting to ER                                     |                    |



Stable4\_20PerPair

|                                           |                                                  |                         |                   |
|-------------------------------------------|--------------------------------------------------|-------------------------|-------------------|
| GO:0072599                                | 2.20489973980139e-21                             | 47.8801498127341        | 0.542799806241783 |
| 17 106                                    | establishment of protein localization to         | endoplasmic reticulum   |                   |
| GO:0006415                                | 7.68629683613963e-21                             | 52.6050574712644        | 0.465988512905681 |
| 16 91                                     | translational termination                        |                         |                   |
| GO:0000184                                | 7.13699961349572e-19                             | 38.2296618680951        | 0.609369593799737 |
| 16 119                                    | nuclear-transcribed mRNA catabolic process,      | nonsense-mediated decay |                   |
| GO:0006413                                | 1.30190114620767e-18                             | 31.4638076673164        | 0.77835443913916  |
| 17 152                                    | translational initiation                         |                         |                   |
| GO:0072594                                | 8.44615921303806e-18                             | 24.5236175115207        | 1.04463358937098  |
| 18 204                                    | establishment of protein localization to         | organelle               |                   |
| GO:0019080                                | 3.59854005924456e-17                             | 29.1024265644955        | 0.773233686250086 |
| 16 151                                    | viral genome expression                          |                         |                   |
| GO:0019083                                | 3.59854005924456e-17                             | 29.1024265644955        | 0.773233686250086 |
| 16 151                                    | viral transcription                              |                         |                   |
| GO:0043624                                | 4.45746211556904e-17                             | 28.6735464384596        | 0.783475192028233 |
| 16 153                                    | cellular protein complex disassembly             |                         |                   |
| GO:0043241                                | 7.51285448947764e-17                             | 27.6542010684798        | 0.8090789564736   |
| 158                                       | protein complex disassembly                      |                         | 16                |
| GO:0000956                                | 2.22931742046762e-16                             | 25.6461573135001        | 0.865407238253408 |
| 16 169                                    | nuclear-transcribed mRNA catabolic process       |                         |                   |
| GO:0034623                                | 3.56379789069896e-16                             | 24.8258402444347        | 0.891011002698775 |
| 16 174                                    | cellular macromolecular complex disassembly      |                         |                   |
| GO:0006402                                | 5.13289498287159e-16                             | 24.2060451255854        | 0.911494014255069 |
| 16 178                                    | mRNA catabolic process                           |                         |                   |
| GO:0032984                                | 5.61524128513149e-16                             | 24.0558493759255        | 0.916614767144142 |
| 16 179                                    | macromolecular complex disassembly               |                         |                   |
| GO:0006401                                | 4.87147113841289e-15                             | 20.7086298120781        | 1.04975434226005  |
| 16 205                                    | RNA catabolic process                            |                         |                   |
| GO:0019058                                | 3.1930834512106e-14                              | 18.1709703287891        | 1.18289391737596  |
| 16 231                                    | viral infectious cycle                           |                         |                   |
| GO:0022415                                | 2.01364976172497e-13                             | 15.9785189372527        | 1.33139575115909  |
| 16 260                                    | viral reproductive process                       |                         |                   |
| GO:0071845                                | 7.85415494261642e-13                             | 14.5229027277406        | 1.45429382049685  |
| 16 284                                    | cellular component disassembly at cellular level |                         |                   |
| GO:0022411                                | 9.73321335290367e-13                             | 14.3052738336714        | 1.47477683205315  |
| 16 288                                    | cellular component disassembly                   |                         |                   |
| GO:0006605                                | 1.7900267005612e-12                              | 10.5701498501498        | 2.4272368694208   |
| 474                                       | protein targeting                                |                         | 19                |
| GO:0016032                                | 8.18141692971715e-12                             | 10.35103926097          | 2.30945955297211  |
| 451                                       | viral reproduction                               |                         | 18                |
| GO:0033365                                | 1.8035401165751e-11                              | 9.83500784929356        | 2.42211611653173  |
| 18 473                                    | protein localization to organelle                |                         |                   |
| GO:0071843                                | 3.36134997539575e-08                             | 10.8353522695628        | 1.22385994048855  |
| 11 239                                    | cellular component biogenesis at cellular level  |                         |                   |
| GO:0042254                                | 6.45674587116319e-08                             | 14.0805494505494        | 0.76299218047194  |
| 9 149                                     | ribosome biogenesis                              |                         |                   |
| GO:0022613                                | 2.06240591122515e-07                             | 10.2921511627907        | 1.15216940004152  |
| 10 225                                    | ribonucleoprotein complex biogenesis             |                         |                   |
| Tissue: whole_Blood=>Adipose_Subcutaneous | Type: asymmetric                                 |                         |                   |

SourceGene: A2ML1(ENSG00000166535.14) alpha-2-macroglobulin-like 1

TargetGeneSet: RPL22 RP11 RP1 RPL11 RP4 RPL5 UBC FABP1 COA5

STable4\_20PerPair

|          |       |        |        |         |          |        |         |         |          |
|----------|-------|--------|--------|---------|----------|--------|---------|---------|----------|
| LYG2     | RPL31 | MTX2   | EEF1B2 | MYEOV2  | PA2G4P4  | VWA5B2 | RPL35A  | RPL34   | CTD      |
| UQCRQ    | RPS14 | COX7A2 | RWDD1  | MRPS12  | RPS20    | SNHG6  | COPS5   | RPS6    | CBWD6    |
| RPS24    | RBM4  | RPS25  | KRT5   | ARL6IP4 | EXOSC8   | TPT1   | RPS3AP6 | RPLP1   | C15orf38 |
| KRT10    | KRT14 | DNAJC7 | RPL27  | DSC1    | C19orf80 |        | CASP14  | LGALS7B | ROMO1    |
| RPS19BP1 |       | RP6    | ARSF   | RPL39   | PSMA6P1  |        |         |         | TH1L     |

| GOBPID                                                         | Pvalue   | OddsRatio | ExpCount    | Count       | Size | Term |
|----------------------------------------------------------------|----------|-----------|-------------|-------------|------|------|
| GO:0006414                                                     | 3.57E-25 |           | 117.0500511 | 0.27610546  | 16   | 105  |
| translational elongation                                       |          |           |             |             |      |      |
| GO:0006413                                                     | 2.25E-24 |           | 85.61763668 | 0.399695523 | 17   | 152  |
| translational initiation                                       |          |           |             |             |      |      |
| GO:0006415                                                     | 3.98E-24 |           | 123.0291762 | 0.239291399 | 15   | 91   |
| translational termination                                      |          |           |             |             |      |      |
| GO:0006614                                                     | 3.96E-23 |           | 103.7898551 | 0.27610546  | 15   | 105  |
| SRP-dependent cotranslational protein targeting to membrane    |          |           |             |             |      |      |
| GO:0006613                                                     | 4.61E-23 |           | 102.6421405 | 0.278735036 | 15   | 106  |
| cotranslational protein targeting to membrane                  |          |           |             |             |      |      |
| GO:0045047                                                     | 4.61E-23 |           | 102.6421405 | 0.278735036 | 15   | 106  |
| protein targeting to ER                                        |          |           |             |             |      |      |
| GO:0072599                                                     | 4.61E-23 |           | 102.6421405 | 0.278735036 | 15   | 106  |
| establishment of protein localization to endoplasmic reticulum |          |           |             |             |      |      |

STable4\_20PerPair

|                                                                       |          |             |             |    |     |      |
|-----------------------------------------------------------------------|----------|-------------|-------------|----|-----|------|
| GO:0019080                                                            | 1.64E-22 | 76.91851852 | 0.397065947 | 16 | 151 |      |
| viral genome expression                                               |          |             |             |    |     |      |
| GO:0019083                                                            | 1.64E-22 | 76.91851852 | 0.397065947 | 16 | 151 |      |
| viral transcription                                                   |          |             |             |    |     |      |
| GO:0070972                                                            | 2.52E-22 | 90.60785141 | 0.310289945 | 15 | 118 |      |
| protein localization to endoplasmic reticulum                         |          |             |             |    |     |      |
| GO:0000184                                                            | 2.88E-22 | 89.73035117 | 0.312919521 | 15 | 119 |      |
| "nuclear-transcribed mRNA catabolic process, nonsense-mediated decay" |          |             |             |    |     |      |
| GO:0000956                                                            | 1.06E-21 | 67.78371955 | 0.444398312 | 16 | 169 |      |
| nuclear-transcribed mRNA catabolic process                            |          |             |             |    |     |      |
| GO:0006402                                                            | 2.49E-21 | 63.97755331 | 0.468064494 | 16 | 178 | mRNA |
| catabolic process                                                     |          |             |             |    |     |      |
| GO:0006612                                                            | 1.47E-20 | 67.46219282 | 0.402325099 | 15 | 153 |      |
| protein targeting to membrane                                         |          |             |             |    |     |      |
| GO:0043624                                                            | 1.47E-20 | 67.46219282 | 0.402325099 | 15 | 153 |      |
| cellular protein complex disassembly                                  |          |             |             |    |     |      |
| GO:0072594                                                            | 2.32E-20 | 55.02901354 | 0.536433465 | 16 | 204 |      |
| establishment of protein localization to organelle                    |          |             |             |    |     |      |

STable4\_20PerPair

|                                                  |          |             |             |    |     |     |
|--------------------------------------------------|----------|-------------|-------------|----|-----|-----|
| GO:0043241                                       | 2.42E-20 | 65.0805716  | 0.415472978 | 15 | 158 |     |
| protein complex disassembly                      |          |             |             |    |     |     |
| GO:0006401                                       | 2.52E-20 | 54.73400673 | 0.539063041 | 16 | 205 | RNA |
| catabolic process                                |          |             |             |    |     |     |
| GO:0034623                                       | 1.07E-19 | 58.4659557  | 0.457546191 | 15 | 174 |     |
| cellular macromolecular complex disassembly      |          |             |             |    |     |     |
| GO:0032984                                       | 1.65E-19 | 56.6635737  | 0.47069407  | 15 | 179 |     |
| macromolecular complex disassembly               |          |             |             |    |     |     |
| GO:0019058                                       | 1.76E-19 | 48.02706131 | 0.607432012 | 16 | 231 |     |
| viral infectious cycle                           |          |             |             |    |     |     |
| GO:0022415                                       | 1.19E-18 | 42.23248882 | 0.68368971  | 16 | 260 |     |
| viral reproductive process                       |          |             |             |    |     |     |
| GO:0071845                                       | 1.80E-16 | 34.29125586 | 0.746799529 | 15 | 284 |     |
| cellular component disassembly at cellular level |          |             |             |    |     |     |
| GO:0022411                                       | 2.21E-16 | 33.77926421 | 0.757317833 | 15 | 288 |     |
| cellular component disassembly                   |          |             |             |    |     |     |
| GO:0016032                                       | 7.37E-15 | 23.36969697 | 1.185938689 | 16 | 451 |     |
| viral reproduction                               |          |             |             |    |     |     |

STable4\_20PerPair

|                                                 |          |             |             |    |     |           |
|-------------------------------------------------|----------|-------------|-------------|----|-----|-----------|
| GO:0033365                                      | 1.55E-14 | 22.20966779 | 1.243789357 | 16 | 473 |           |
| protein localization to organelle               |          |             |             |    |     |           |
| GO:0006605                                      | 1.60E-14 | 22.15958714 | 1.246418933 | 16 | 474 |           |
| protein targeting                               |          |             |             |    |     |           |
| GO:0042254                                      | 3.98E-09 | 26.99196217 | 0.391806795 | 8  | 149 |           |
| ribosome biogenesis                             |          |             |             |    |     |           |
| GO:0022613                                      | 5.05E-09 | 20.39798851 | 0.591654557 | 9  | 225 |           |
| ribonucleoprotein complex biogenesis            |          |             |             |    |     |           |
| GO:0071843                                      | 8.55E-09 | 19.13748126 | 0.628468618 | 9  | 239 |           |
| cellular component biogenesis at cellular level |          |             |             |    |     |           |
| GO:0006364                                      | 8.57E-09 | 33.32623878 | 0.273475884 | 7  | 104 | rRNA      |
| processing                                      |          |             |             |    |     |           |
| GO:0016072                                      | 1.27E-08 | 31.3717507  | 0.289253339 | 7  | 110 | rRNA      |
| metabolic process                               |          |             |             |    |     |           |
| GO:0042274                                      | 1.21E-07 | 121         | 0.047332365 | 4  | 18  | ribosomal |
| small subunit biogenesis                        |          |             |             |    |     |           |
| GO:0000028                                      | 3.34E-07 | 411.7142857 | 0.015777455 | 3  | 6   |           |
| ribosomal small subunit assembly                |          |             |             |    |     |           |

STable4\_20PerPair

GO:0034470 7.68E-07 16.63713856 0.525915162 7 200  
ncRNA processing

GO:0042273 3.63E-06 137.1809524 0.03155491 3 12  
ribosomal large subunit biogenesis

GO:0034660 8.06E-06 11.48120214 0.749429105 7 285  
ncRNA metabolic process

GO:0042255 9.18E-06 94.94505495 0.042073213 3 16  
ribosome assembly

Tissue: whole\_Blood=>Adipose\_Subcutaneous Type: asymmetric

SourceGene: ACA64(ENSG00000239005.1) "small nucleolar RNA, H/ACA box 78"

TargetGeneSet: RPL11 TAF12 RP11 C2orf28 CCDC115 RPL24 RPL34 RPS3A  
NDUFS4 MIP BTF3 CTB NIPAL4 CSNK2B RPS20 RPL30 RPS6 RPL35  
NUP188 RPS24 SFR1 FAM53B FAU RPS25 DNAL1 RPS3AP6 RPS15A GABARAP CTD  
RPL26 RPL17 C19orf53 UBA52 CHMP4B LAMA5 HCFC1 AMELY

GOBPID Pvalue OddsRatio ExpCount Count Size Term

GO:0006415 1.50E-25 166.5208978 0.201508546 15 91  
translational termination

GO:0006414 1.50E-24 140.4803922 0.232509861 15 105  
translational elongation

|                                                                       |          | STable4_20PerPair |             |    |     |
|-----------------------------------------------------------------------|----------|-------------------|-------------|----|-----|
| GO:0006614                                                            | 1.50E-24 | 140.4803922       | 0.232509861 | 15 | 105 |
| SRP-dependent cotranslational protein targeting to membrane           |          |                   |             |    |     |
| GO:0006613                                                            | 1.75E-24 | 138.9269554       | 0.234724241 | 15 | 106 |
| cotranslational protein targeting to membrane                         |          |                   |             |    |     |
| GO:0045047                                                            | 1.75E-24 | 138.9269554       | 0.234724241 | 15 | 106 |
| protein targeting to ER                                               |          |                   |             |    |     |
| GO:0072599                                                            | 1.75E-24 | 138.9269554       | 0.234724241 | 15 | 106 |
| establishment of protein localization to endoplasmic reticulum        |          |                   |             |    |     |
| GO:0070972                                                            | 9.61E-24 | 122.6384923       | 0.261296796 | 15 | 118 |
| protein localization to endoplasmic reticulum                         |          |                   |             |    |     |
| GO:0000184                                                            | 1.10E-23 | 121.4507919       | 0.263511176 | 15 | 119 |
| "nuclear-transcribed mRNA catabolic process, nonsense-mediated decay" |          |                   |             |    |     |
| GO:0019080                                                            | 4.62E-22 | 92.66652249       | 0.334371324 | 15 | 151 |
| viral genome expression                                               |          |                   |             |    |     |
| GO:0019083                                                            | 4.62E-22 | 92.66652249       | 0.334371324 | 15 | 151 |
| viral transcription                                                   |          |                   |             |    |     |
| GO:0006413                                                            | 5.12E-22 | 91.98368398       | 0.336585703 | 15 | 152 |
| translational initiation                                              |          |                   |             |    |     |
| GO:0006612                                                            | 5.67E-22 | 91.31074169       | 0.338800083 | 15 | 153 |
| protein targeting to membrane                                         |          |                   |             |    |     |
| GO:0043624                                                            | 5.67E-22 | 91.31074169       | 0.338800083 | 15 | 153 |
| cellular protein complex disassembly                                  |          |                   |             |    |     |

STable4\_20PerPair

|                                                    |                   |             |             |    |     |      |
|----------------------------------------------------|-------------------|-------------|-------------|----|-----|------|
| GO:0043241                                         | 9.34E-22          | 88.08720691 | 0.349871981 | 15 | 158 |      |
| protein complex                                    | disassembly       |             |             |    |     |      |
| GO:0000956                                         | 2.65E-21          | 81.73223835 | 0.374230157 | 15 | 169 |      |
| nuclear-transcribed mRNA                           | catabolic process |             |             |    |     |      |
| GO:0034623                                         | 4.16E-21          | 79.13429523 | 0.385302055 | 15 | 174 |      |
| cellular macromolecular complex                    | disassembly       |             |             |    |     |      |
| GO:0006402                                         | 5.91E-21          | 77.1706965  | 0.394159574 | 15 | 178 | mRNA |
| catabolic process                                  |                   |             |             |    |     |      |
| GO:0032984                                         | 6.44E-21          | 76.69476327 | 0.396373953 | 15 | 179 |      |
| macromolecular complex                             | disassembly       |             |             |    |     |      |
| GO:0022415                                         | 3.53E-20          | 58.0942623  | 0.575738703 | 16 | 260 |      |
| viral reproductive process                         |                   |             |             |    |     |      |
| GO:0072594                                         | 4.80E-20          | 66.43323996 | 0.451733444 | 15 | 204 |      |
| establishment of protein localization to organelle |                   |             |             |    |     |      |
| GO:0006401                                         | 5.18E-20          | 66.07894737 | 0.453947824 | 15 | 205 | RNA  |
| catabolic process                                  |                   |             |             |    |     |      |
| GO:0016032                                         | 1.78E-19          | 41.52886836 | 0.998685212 | 18 | 451 |      |
| viral reproduction                                 |                   |             |             |    |     |      |
| GO:0019058                                         | 3.20E-19          | 58.01879085 | 0.511521694 | 15 | 231 |      |
| viral infectious cycle                             |                   |             |             |    |     |      |



| GO ID      | P-value  | Stable4_20PerPair | 46.41373278 | 0.628883814 | 15  | 284                                              |
|------------|----------|-------------------|-------------|-------------|-----|--------------------------------------------------|
| GO:0071845 | 7.30E-18 | 46.41373278       | 0.628883814 | 15          | 284 | cellular component disassembly at cellular level |
| GO:0022411 | 9.02E-18 | 45.72074984       | 0.637741333 | 15          | 288 | cellular component disassembly                   |
| GO:0006605 | 1.60E-17 | 34.6249453        | 1.049615944 | 17          | 474 | protein targeting                                |
| GO:0033365 | 5.02E-16 | 30.55142232       | 1.047401564 | 16          | 473 | protein localization to organelle                |
| GO:0042274 | 7.87E-06 | 99.33793103       | 0.039858833 | 3           | 18  | ribosomal small subunit biogenesis               |
| GO:0022613 | 8.61E-06 | 14.96311907       | 0.498235416 | 6           | 225 | ribonucleoprotein complex biogenesis             |
| GO:0071843 | 1.21E-05 | 14.05018158       | 0.529236731 | 6           | 239 | cellular component biogenesis at cellular level  |
| GO:0042254 | 1.75E-05 | 18.35776749       | 0.329942565 | 5           | 149 | ribosome biogenesis                              |

Tissue: whole\_Blood=>Adipose\_Subcutaneous Type: asymmetric

SourceGene: ANKRD18EP(ENSG00000217165.1) "ankyrin repeat domain 18E, pseudogene"

STable4\_20PerPair

TargetGeneSet: HSPG2 RPL11 SYNC RPS8 RPL5 RP11 PRX CENPO  
 PPP1CB UBC ANKAR EEF1B2 RPL15 MAP4 RPL29 MIR135A1 RELL1  
 AIMP1 RPL34 NDUFAF2 BTF3 NSA2 TBCA CTB SYNPO NPM1 JARID2-AS1  
 GPLD1 RPL10A FILIP1 MRPS12 SFT2D1 RPS20 RPL30 EIF3H RPS6 CLTA  
 ANP32B RPL35 RPL12 RPL7A RPS24 RPL27A EIF3M ZNF705E SNORD15B  
 RPS25 PS5 NAP1L1 CCDC59 RPL18AP3 RPL31P52 RPL21 RSL24D1  
 RPS3AP6 RPS15A RPL13 RPL26 RPL17 RPL19 NT5C C18orf1 RPS15 RPL36  
 RPL18 RPS9 ZNF154 ZNF671 SNRPB2 MORC2

| GOBPID                                                      | Pvalue   | OddsRatio | ExpCount    | Count       | Size | Term |
|-------------------------------------------------------------|----------|-----------|-------------|-------------|------|------|
| GO:0006414                                                  | 1.69E-46 |           | 185.9480519 | 0.406892257 | 28   | 105  |
| translational elongation                                    |          |           |             |             |      |      |
| GO:0006415                                                  | 3.43E-46 |           | 208.4789871 | 0.352639956 | 27   | 91   |
| translational termination                                   |          |           |             |             |      |      |
| GO:0006614                                                  | 2.99E-44 |           | 170.8925729 | 0.406892257 | 27   | 105  |
| SRP-dependent cotranslational protein targeting to membrane |          |           |             |             |      |      |
| GO:0006613                                                  | 4.00E-44 |           | 168.7175906 | 0.410767421 | 27   | 106  |
| cotranslational protein targeting to membrane               |          |           |             |             |      |      |
| GO:0045047                                                  | 4.00E-44 |           | 168.7175906 | 0.410767421 | 27   | 106  |
| protein targeting to ER                                     |          |           |             |             |      |      |

STable4\_20PerPair

|                                                                       |          |             |             |    |     |
|-----------------------------------------------------------------------|----------|-------------|-------------|----|-----|
| GO:0072599                                                            | 4.00E-44 | 168.7175906 | 0.410767421 | 27 | 106 |
| establishment of protein localization to endoplasmic reticulum        |          |             |             |    |     |
| GO:0006413                                                            | 1.51E-43 | 124.6275218 | 0.589024981 | 29 | 152 |
| translational initiation                                              |          |             |             |    |     |
| GO:0070972                                                            | 1.06E-42 | 146.3463433 | 0.457269393 | 27 | 118 |
| protein localization to endoplasmic reticulum                         |          |             |             |    |     |
| GO:0000184                                                            | 1.37E-42 | 144.7455022 | 0.461144557 | 27 | 119 |
| "nuclear-transcribed mRNA catabolic process, nonsense-mediated decay" |          |             |             |    |     |
| GO:0019080                                                            | 1.64E-39 | 107.1515573 | 0.585149817 | 27 | 151 |
| viral genome expression                                               |          |             |             |    |     |
| GO:0019083                                                            | 1.64E-39 | 107.1515573 | 0.585149817 | 27 | 151 |
| viral transcription                                                   |          |             |             |    |     |
| GO:0006612                                                            | 2.41E-39 | 105.4359606 | 0.592900145 | 27 | 153 |
| protein targeting to membrane                                         |          |             |             |    |     |

STable4\_20PerPair

|                                                    |          |             |             |    |     |      |
|----------------------------------------------------|----------|-------------|-------------|----|-----|------|
| GO:0043624                                         | 2.41E-39 | 105.4359606 | 0.592900145 | 27 | 153 |      |
| cellular protein complex disassembly               |          |             |             |    |     |      |
| GO:0043241                                         | 6.18E-39 | 101.3761516 | 0.612275967 | 27 | 158 |      |
| protein complex disassembly                        |          |             |             |    |     |      |
| GO:0000956                                         | 4.38E-38 | 93.45094706 | 0.654902775 | 27 | 169 |      |
| nuclear-transcribed mRNA catabolic process         |          |             |             |    |     |      |
| GO:0034623                                         | 1.02E-37 | 90.24067558 | 0.674278597 | 27 | 174 |      |
| cellular macromolecular complex disassembly        |          |             |             |    |     |      |
| GO:0006402                                         | 1.96E-37 | 87.82553094 | 0.689779254 | 27 | 178 | mRNA |
| catabolic process                                  |          |             |             |    |     |      |
| GO:0032984                                         | 2.31E-37 | 87.24160617 | 0.693654418 | 27 | 179 |      |
| macromolecular complex disassembly                 |          |             |             |    |     |      |
| GO:0072594                                         | 9.77E-36 | 74.78784337 | 0.790533527 | 27 | 204 |      |
| establishment of protein localization to organelle |          |             |             |    |     |      |

STable4\_20PerPair

|                                                  |          |             |             |    |     |     |
|--------------------------------------------------|----------|-------------|-------------|----|-----|-----|
| GO:0006401                                       | 1.12E-35 | 74.36245641 | 0.794408691 | 27 | 205 | RNA |
| catabolic process                                |          |             |             |    |     |     |
| GO:0019058                                       | 3.31E-34 | 64.76622718 | 0.895162965 | 27 | 231 |     |
| viral infectious cycle                           |          |             |             |    |     |     |
| GO:0022415                                       | 9.14E-33 | 56.58931478 | 1.007542731 | 27 | 260 |     |
| viral reproductive process                       |          |             |             |    |     |     |
| GO:0071845                                       | 1.07E-31 | 51.21776466 | 1.100546675 | 27 | 284 |     |
| cellular component disassembly at cellular level |          |             |             |    |     |     |
| GO:0022411                                       | 1.57E-31 | 50.41854935 | 1.116047332 | 27 | 288 |     |
| cellular component disassembly                   |          |             |             |    |     |     |
| GO:0016032                                       | 3.29E-26 | 30.67802537 | 1.747699121 | 27 | 451 |     |
| viral reproduction                               |          |             |             |    |     |     |
| GO:0033365                                       | 1.18E-25 | 29.11883408 | 1.832952737 | 27 | 473 |     |
| protein localization to organelle                |          |             |             |    |     |     |

STable4\_20PerPair

|                                                               |          |             |             |    |     |      |
|---------------------------------------------------------------|----------|-------------|-------------|----|-----|------|
| GO:0006605<br>protein targeting                               | 1.25E-25 | 29.05160842 | 1.836827901 | 27 | 474 |      |
| GO:0042254<br>ribosome biogenesis                             | 3.49E-13 | 28.38354346 | 0.577399488 | 12 | 149 |      |
| GO:0022613<br>ribonucleoprotein complex biogenesis            | 2.34E-12 | 20.22586661 | 0.871911978 | 13 | 225 |      |
| GO:0071843<br>cellular component biogenesis at cellular level | 5.03E-12 | 18.95420868 | 0.926164279 | 13 | 239 |      |
| GO:0006364<br>processing                                      | 5.85E-09 | 24.82465278 | 0.403017092 | 8  | 104 | rRNA |
| GO:0042274<br>ribosomal small subunit biogenesis              | 6.00E-09 | 108.4615385 | 0.069752958 | 5  | 18  |      |
| GO:0016072<br>metabolic process                               | 9.14E-09 | 23.35457516 | 0.426268078 | 8  | 110 | rRNA |

GO:0034470 9.41E-07 ncrRNA processing 12.32899306 0.77503287 8 200

GO:0034660 1.34E-06 ncrRNA metabolic process 9.795790934 1.104421839 9 285

GO:0042273 1.18E-05 ribosomal large subunit biogenesis 90.47798742 0.046501972 3 12

Tissue: whole\_Blood=>Adipose\_subcutaneous Type: cluster  
SourceGene: ENSG00000229344.1  
TargetGeneSet: LDLRAD2 HSPG2 RPL11 ARID1A KPNA7 ZMYM4 THRAP3 RPS8  
RPS15AP10 RPL5 RP11 SNX7 RPRD2 SPRR2D JTB RPS27 UBAP2L SSR2  
RAB25 SHISA4 NENF CICP13 NBAS PPP1CB UBC TMEM131 EIF5B RANBP2  
UGGT1 PLEKHA3 UBE2E3 TRIP12 BRK1 UBE2E1 RPL15 RAD54L2 RPL29 KCTD6 PCNP  
RPL24 RYK GPR87 EIF4G1 PPP1R2 HTT BOD1L DANCR CISD2 RPL34  
NDUFC1 RPS3A NIPBL CTD TAF9 BTF3 AP3S1 CTB MTND5P11 SIL1  
HDAC3 RPS14 GNB2L1 RP3 TMEM14C RPL15P3 DEK RSL24D1P1 PPP1R10  
AGPAT1 RPS18 GLO1 MRPL32 MTRNR2L9 WDR11 RWDD1 MRPS12 RAB32  
IGF2R PSMB1 STARD3NL CLDN3 SPDYE2 ATXN7L1 FAM3C DRP2 HMBOX1  
HOOK3 RPS20 ARFGEF1 RPL30 TG NFIB RPS6 CLTA PCSK5 NIPSNAP3A  
ZNF462 ATP6V1G1 RPL12 PTGES RPL7A SEC16A CALML5 PRINS KIAA0913  
RPS24 MRPL43 GBF1 RPL27A MTRNR2L8 CKAP5 BAD ZNHIT2 CCDC90B  
C11orf73 FDX1 UBE4A DDX6 ERC1 A2M SCAF11 MLL4 PFDN5 CBX5  
MYF6 USP44 GTF3A ESD NUDT15 MED4 DNAJC3 CCNB1IP1 CHD8  
CGRRF1 DHRS7 YLPM1 C14orf142 CCNK HERC2P10 USP8 RPS27L  
CALML4 C15orf40 SEC11A MPG SPSB3 TSC2 NTAN1 RPS15A GTF3C1  
LONP2 FBXL8 PIEZO1 RPL13 VPS53 WDR81 POLR2A RPL26 RPL23A TAF15  
RPL19 CDK12 KRT14 RPL27 XYLT2 SUPT4H1 CLTC TNRC6C ROCK1P1 DSG1  
RPS15 AP3D1 NFIC ARRDC5 PTPRS NDUFA11 ZNF121 EIF3G ZNF791 C19orf43  
BRD4 UPF1 KRTDAP SBSN ZNF526 ERF ZNF428 RPL18 NUCB1 NUCB1-AS1  
RPL13A KLK7 CCDC106 ZNF587 RPS5 KIF3B CHMP4B SCAND1 TOP1 NCOA3  
RPL12P4 FAM211B TTC28 EIF3L RPL3 TNRC6B EP300 TMSB4X DYNLT3 UXT  
WDR45 HUWE1 RPS4X COX7B RPL39 HCFC1 MT  
GOBPID Pvalue OddsRatio ExpCount Count Size Term  
GO:0006415 1.06365468144771e-40 56.5663129973475 1.10829700366757  
33 91 translational termination  
GO:0006614 6.07105534805468e-40 47.9008133306884 1.27880423500104  
34 105 SRP-dependent cotranslational protein targeting to membrane  
GO:0006613 8.85206189936669e-40 47.2321987480438 1.29098332295343  
34 106 cotranslational protein targeting to membrane  
GO:0045047 8.85206189936669e-40 47.2321987480438 1.29098332295343  
34 106 protein targeting to ER  
GO:0072599 8.85206189936669e-40 47.2321987480438 1.29098332295343  
34 106 establishment of protein localization to endoplasmic reticulum

Stable4\_20PerPair

|            |                      |                                                                     |                     |
|------------|----------------------|---------------------------------------------------------------------|---------------------|
| GO:0070972 | 5.95242744048001e-38 | 40.4505365526492                                                    | 1.43713237838212    |
| 34         | 118                  | protein localization to endoplasmic reticulum                       |                     |
| GO:0000184 | 8.25326467032465e-38 | 39.9718309859155                                                    | 1.44931146633451    |
| 34         | 119                  | nuclear-transcribed mRNA catabolic process, nonsense-mediated decay |                     |
| GO:0006413 | 9.25877719238335e-37 | 31.3869458128079                                                    | 1.85122136876341    |
| 36         | 152                  | translational initiation                                            |                     |
| GO:0006414 | 1.27246393757952e-36 | 43.2328767123288                                                    | 1.27880423500104    |
| 32         | 105                  | translational elongation                                            |                     |
| GO:0019080 | 2.22646549820877e-35 | 30.2986671557838                                                    | 1.83904228081102    |
| 35         | 151                  | viral genome expression                                             |                     |
| GO:0019083 | 2.22646549820877e-35 | 30.2986671557838                                                    | 1.83904228081102    |
| 35         | 151                  | viral transcription                                                 |                     |
| GO:0006612 | 1.08039642679469e-33 | 28.4828973843058                                                    | 1.8634004567158 34  |
| 153        |                      | protein targeting to membrane                                       |                     |
| GO:0000956 | 1.57734892540332e-33 | 26.1953530221234                                                    | 2.05826586395405    |
| 35         | 169                  | nuclear-transcribed mRNA catabolic process                          |                     |
| GO:0006402 | 1.09225596040921e-32 | 24.5310717651143                                                    | 2.16787765552557    |
| 35         | 178                  | mRNA catabolic process                                              |                     |
| GO:0043624 | 3.03514988855692e-32 | 27.2211538461538                                                    | 1.8634004567158 33  |
| 153        |                      | cellular protein complex disassembly                                |                     |
| GO:0043241 | 9.48800926251924e-32 | 26.1230769230769                                                    | 1.92429589647775    |
| 33         | 158                  | protein complex disassembly                                         |                     |
| GO:0022415 | 1.13073206866945e-31 | 18.1030485186775                                                    | 3.16656286762162    |
| 39         | 260                  | viral reproductive process                                          |                     |
| GO:0034623 | 1.16901936490966e-31 | 24.1745472837022                                                    | 2.11916130371601    |
| 34         | 174                  | cellular macromolecular complex disassembly                         |                     |
| GO:0032984 | 3.23586360878366e-31 | 23.3326857697912                                                    | 2.18005674347796    |
| 34         | 179                  | macromolecular complex disassembly                                  |                     |
| GO:0019058 | 4.06249468988904e-31 | 19.3205147222428                                                    | 2.81336931700228    |
| 37         | 231                  | viral infectious cycle                                              |                     |
| GO:0072594 | 1.63214336505591e-30 | 20.7188719627345                                                    | 2.48453394228773    |
| 35         | 204                  | establishment of protein localization to organelle                  |                     |
| GO:0006401 | 1.949266726902e-30   | 20.5955360867751                                                    | 2.49671303024012    |
| 35         | 205                  | RNA catabolic process                                               |                     |
| GO:0033365 | 7.42989514764804e-28 | 11.1135585360634                                                    | 5.76070860148087    |
| 45         | 473                  | protein localization to organelle                                   |                     |
| GO:0016032 | 1.25639378342209e-26 | 10.9885190918473                                                    | 5.49276866652827    |
| 43         | 451                  | viral reproduction                                                  |                     |
| GO:0006605 | 9.55009675508157e-26 | 10.384871691991                                                     | 5.77288768943326 43 |
| 474        |                      | protein targeting                                                   |                     |
| GO:0071845 | 2.00161424269755e-25 | 13.9824546412601                                                    | 3.458860978479 35   |
| 284        |                      | cellular component disassembly at cellular level                    |                     |
| GO:0022411 | 3.24250576211197e-25 | 13.7574636279539                                                    | 3.50757733028856    |
| 35         | 288                  | cellular component disassembly                                      |                     |
| GO:0042274 | 1.90753772942983e-06 | 32.0782726045884                                                    | 0.219223583143035   |
| 5          | 18                   | ribosomal small subunit biogenesis                                  |                     |
| GO:0022613 | 3.78516319362095e-06 | 5.29051394837365                                                    | 2.74029478928794    |
| 13         | 225                  | ribonucleoprotein complex biogenesis                                |                     |
| GO:0071843 | 7.31058455181605e-06 | 4.95784244530105                                                    | 2.91080202062141    |
| 13         | 239                  | cellular component biogenesis at cellular level                     |                     |
| GO:0006417 | 1.27264762000865e-05 | 5.56449704142012                                                    | 2.19223583143035    |
| 11         | 180                  | regulation of translation                                           |                     |
| GO:0042254 | 1.41161258095143e-05 | 6.12637600762763                                                    | 1.81468410490623    |
| 10         | 149                  | ribosome biogenesis                                                 |                     |

Tissue: whole\_Blood=>Adipose\_Subcutaneous

Type: asymmetric

SourceGene: ENSG00000252229.1

|                |           |          |        |        |       |           |         |          |        |
|----------------|-----------|----------|--------|--------|-------|-----------|---------|----------|--------|
| TargetGeneSet: | MTND1P23  | DNAJC11  | CLSTN1 | DFFA   | DDI2  | PAQR7     | ARID1A  |          |        |
| KPNA7          | ZMYM4-AS1 | THRAP3   | RPS8   | JAK1   | WLS   | RPL5      | RP11    | RPRD2    |        |
| RPS27          | UBAP2L    | FCGR2C   | TKT    | POU2F1 | RPS7  | KIDINS220 | CALM2   | UBC      | AAK1   |
| GMCL1          | TET3      | EIF5B    | UGGT1  | RHOQP2 | MYO1C | MLK7-AS1  | TRIP12  | GIGYF2   | BRK1   |
| LAMB2          | RAD54L2   | RPL29    | APPL1  | KCTD6  | CTD   | RPL24     | ZBTB20  | ACTG1P1  | PDCD10 |
| DNAJC19        | PSMD2     | BOD1L    | PDGFRA | RPL34  | RPS3A | SREK1IP1  | SERF1B  | FNIP1    | SKP1   |
| UBE2B          | CTB       | MTND5P11 | CSF1R  | RPS14  | DOCK2 | TBC1D9B   | RPL15P3 | MTRNR2L9 |        |



Stable4\_20PerPair

| WDR11      | RP1       | TBPL1     | PHACTR2              | SCAF8            | IGF2R            | TRA2A             | RPS3AP26 |           | ARPC1A   | MTPN |  |  |
|------------|-----------|-----------|----------------------|------------------|------------------|-------------------|----------|-----------|----------|------|--|--|
| CLN8       | KIF13B    | HOOK3     | ASPH                 | ZFHX4            | FABP5            | EEF1D             | VPS28    | RPL8      | RPS6     |      |  |  |
| RNU2-5P    | NIPSNAP3A |           | FKBP15               | RPL12            | GLE1             | RPL7A             | MRC1     | PRINS     | ZNF37BP  |      |  |  |
| RPS24      | FAM53B    | VENTX     | RPL27A               | MTRNR2L8         |                  | CKAP5             | C11orf31 |           | FABP5P7  | DDB1 |  |  |
| SLCO2B1    | TMEM126B  |           | BACE1                | UBE4A            | DDX6             | APPL2             | CD163    | GUCY2C    | PFDN5    | CBX5 |  |  |
| LRP1       | OS9       | GNS       | RBMS1P1              | EEA1             | PLXNC1           | RPL18AP3          |          | PARP4-AS1 |          |      |  |  |
| PHF11      | RPL13AP25 |           | HNRNPA3P5            |                  | MYCBP2-AS1       |                   | DNAJC3   | RNASE6    | CHD8     |      |  |  |
| C14orf28   |           | C14orf43  |                      | SIVA1            | C14orf80         |                   | GOLGA8IP |           | HERC2P10 |      |  |  |
| FMN1       | USP8      | PIAS1     | MEF2A                | LRRK1            | MPG              | NME3              | ABCC1    | RPS15A    | SRCAP    |      |  |  |
| ZNF629     | NFATC3    | VPS4A     | TERF2                | ATXN1L           | GLG1             | VPS53             | METTTL16 | RPL26     | SSH2     |      |  |  |
| TAF15      | CDK12     | DHX8      | NMT1                 | MED13            | TNRC6C           | TBC1D16           | ROCK1P1  | ANKRD12   | RPL17    |      |  |  |
| RPL36      | NDUFA11   | MYO1F     | ZNF121               | BRD4             | CYP4F12          | SUPT5H            | POU2F2   | CNFN      | RPL18    |      |  |  |
| RPL13A     | RPS5      | SIRPG     | TSHZ2                | RPL12P4          | TRPM2            | CTA               | TTC28    | APOBEC3C  |          | RPL3 |  |  |
| TNRC6B     | EP300     | TMSB4X    | DYNLT3               | WDR45            | TTC3P1           | PGAM4             | XIAP     | MT        |          |      |  |  |
| GOBPID     | Pvalue    | OddsRatio | ExpCount             | Count            | Size             | Term              |          |           |          |      |  |  |
| GO:0006415 | 24        | 91        | 2.00188708910009e-27 | 39.5168344324887 |                  | 0.963462736142828 |          |           |          |      |  |  |
| GO:0006414 | 105       |           | 2.61881020490939e-27 | 34.7119140625    | 1.11168777247249 |                   |          |           |          | 25   |  |  |
| GO:0070972 | 25        | 118       | 6.27573902089993e-26 | 29.8324092741935 |                  | 1.24932530620718  |          |           |          |      |  |  |
| GO:0006614 | 24        | 105       | 8.92408816331945e-26 | 32.6546080964686 |                  | 1.11168777247249  |          |           |          |      |  |  |
| GO:0006613 | 24        | 106       | 1.14365709279469e-25 | 32.2541123085649 |                  | 1.12227527506747  |          |           |          |      |  |  |
| GO:0045047 | 24        | 106       | 1.14365709279469e-25 | 32.2541123085649 |                  | 1.12227527506747  |          |           |          |      |  |  |
| GO:0072599 | 24        | 106       | 1.14365709279469e-25 | 32.2541123085649 |                  | 1.12227527506747  |          |           |          |      |  |  |
| GO:0019080 | 151       |           | 1.85168014270543e-24 | 23.2124724409449 |                  | 1.5987128918414   |          |           |          | 26   |  |  |
| GO:0019083 | 151       |           | 1.85168014270543e-24 | 23.2124724409449 |                  | 1.5987128918414   |          |           |          | 26   |  |  |
| GO:0000184 | 24        | 119       | 2.28689541570279e-24 | 27.8149326805386 |                  | 1.25991280880216  |          |           |          |      |  |  |
| GO:0006413 | 25        | 152       | 5.03204695328668e-23 | 21.7934916338583 |                  | 1.60930039443637  |          |           |          |      |  |  |
| GO:0000956 | 25        | 169       | 7.67853154865473e-22 | 19.1975911458333 |                  | 1.78928793855097  |          |           |          |      |  |  |
| GO:0006612 | 153       |           | 1.27275227658944e-21 | 20.434829637642  | 1.61988789703135 |                   |          |           |          | 24   |  |  |
| GO:0043624 | 153       |           | 1.27275227658944e-21 | 20.434829637642  | 1.61988789703135 |                   |          |           |          | 24   |  |  |
| GO:0034623 | 25        | 174       | 1.61290482923462e-21 | 18.5468225671141 |                  | 1.84222545152585  |          |           |          |      |  |  |
| GO:0043241 | 24        | 158       | 2.80985180226919e-21 | 19.6653939604304 |                  | 1.67282541000623  |          |           |          |      |  |  |
| GO:0006402 | 25        | 178       | 2.87041207150359e-21 | 18.0568321078431 |                  | 1.88457546190575  |          |           |          |      |  |  |
| GO:0032984 | 25        | 179       | 3.30768958865989e-21 | 17.9383116883117 |                  | 1.89516296450073  |          |           |          |      |  |  |
| GO:0006401 | 26        | 205       | 6.19080285127836e-21 | 16.1480666871948 |                  | 2.17043803197011  |          |           |          |      |  |  |
| GO:0019058 | 27        | 231       | 9.13479201410615e-21 | 14.8046218487395 |                  | 2.44571309943949  |          |           |          |      |  |  |
| GO:0072594 | 25        | 204       | 8.76506838445195e-20 | 15.4056826117318 |                  | 2.15985052937513  |          |           |          |      |  |  |
| GO:0022415 | 27        | 260       | 2.08452272859195e-19 | 12.9353157572042 |                  | 2.75275067469379  |          |           |          |      |  |  |
| GO:0071845 | 284       |           | 2.0795496701577e-18  | 11.707337409672  | 3.00685073697322 |                   |          |           |          | 27   |  |  |
| GO:0022411 | 27        | 288       | 2.98547399506604e-18 | 11.5246305418719 |                  | 3.04920074735312  |          |           |          |      |  |  |

Stable4\_20PerPair

|                                           |                      |                                                                     |                   |          |            |           |          |           |          |
|-------------------------------------------|----------------------|---------------------------------------------------------------------|-------------------|----------|------------|-----------|----------|-----------|----------|
| GO:0016032                                | 5.64076217151945e-17 | 8.39613583138173                                                    | 4.77496367033423  |          |            |           |          |           |          |
| 31                                        | 451                  | viral reproduction                                                  |                   |          |            |           |          |           |          |
| GO:0033365                                | 2.15625534068943e-16 | 7.96558118833914                                                    | 5.00788872742371  |          |            |           |          |           |          |
| 31                                        | 473                  | protein localization to organelle                                   |                   |          |            |           |          |           |          |
| GO:0006605                                | 1.37190566205482e-14 | 7.28048205871693                                                    | 5.01847623001868  |          |            |           |          |           |          |
| 29                                        | 474                  | protein targeting                                                   |                   |          |            |           |          |           |          |
| GO:0042274                                | 9.55270984107701e-07 | 37.1231808731809                                                    | 0.19057504670957  |          |            |           |          |           |          |
| 5                                         | 18                   | ribosomal small subunit biogenesis                                  |                   |          |            |           |          |           |          |
| Tissue: whole_Blood=>Adipose_Subcutaneous |                      |                                                                     |                   | Type:    | cluster    |           |          |           |          |
| SourceGene:                               | ENSG00000252229.1    |                                                                     |                   |          |            |           |          |           |          |
| TargetGeneSet:                            | MTND1P23             | DNAJC11                                                             | CLSTN1            | DFFA     | DDI2       | PAQR7     | ARID1A   |           |          |
| KPNA7                                     | ZMYM4-AS1            | THRAP3                                                              | RPS8              | JAK1     | WLS        | RPL5      | RP11     | RPRD2     |          |
| RPS27                                     | UBAP2L               | FCGR2C                                                              | TKT               | POU2F1   | RPS7       | KIDINS220 | CALM2    | UBC       | AAK1     |
| GMCL1                                     | TET3                 | EIF5B                                                               | UGGT1             | RHOQP2   | MYO1C      | MLK7-AS1  | TRIP12   | GIGYF2    | BRK1     |
| LAMB2                                     | RAD54L2              | RPL29                                                               | APPL1             | KCTD6    | CTD        | RPL24     | ZBTB20   | ACTG1P1   | PDCD10   |
| DNAJC19                                   | PSMD2                | BOD1L                                                               | PDGFRA            | RPL34    | RPS3A      | SREK1IP1  | SERF1B   | FNIP1     | SKP1     |
| UBE2B                                     | CTB                  | MTND5P11                                                            | CSF1R             | RPS14    | DOCK2      | TBC1D9B   | RPL15P3  | MTRNR2L9  |          |
| WDR11                                     | RP1                  | TBPL1                                                               | PHACTR2           | SCAF8    | IGF2R      | TRA2A     | RPS3AP26 | ARPC1A    | MTPN     |
| CLN8                                      | KIF13B               | HOOK3                                                               | ASPH              | ZFH4     | FABP5      | EEF1D     | VPS28    | RPL8      | RPS6     |
| RNU2-5P                                   | NIPSNAP3A            |                                                                     | FKBP15            | RPL12    | GLE1       | RPL7A     | MRC1     | PRINS     | ZNF37BP  |
| RPS24                                     | FAM53B               | VENTX                                                               | RPL27A            | MTRNR2L8 |            | CKAP5     | C11orf31 | FABP5P7   | DDB1     |
| SLCO2B1                                   | TMEM126B             |                                                                     | BACE1             | UBE4A    | DDX6       | APPL2     | CD163    | GUCY2C    | PFDN5    |
| LRP1                                      | OS9                  | GNS                                                                 | RBMS1P1           | EEA1     | PLXNC1     | RPL18AP3  |          | PARP4-AS1 |          |
| PHF11                                     | RPL13AP25            |                                                                     | HNRNPA3P5         |          | MYCBP2-AS1 |           | DNAJC3   | RNASE6    | CHD8     |
| C14orf28                                  |                      | C14orf43                                                            |                   | SIVA1    | C14orf80   |           | GOLGA8IP |           | HERC2P10 |
| FMN1                                      | USP8                 | PIAS1                                                               | MEF2A             | LRRK1    | MPG        | NME3      | ABCC1    | RPS15A    | SRCAP    |
| ZNF629                                    | NFATC3               | VPS4A                                                               | TERF2             | ATXN1L   | GLG1       | VPS53     | METTL16  | RPL26     | SSH2     |
| TAF15                                     | CDK12                | DHX8                                                                | NMT1              | MED13    | TNRC6C     | TBC1D16   | ROCK1P1  | ANKRD12   | RPL17    |
| RPL36                                     | NDUFA11              | MYO1F                                                               | ZNF121            | BRD4     | CYP4F12    | SUPT5H    | POU2F2   | CNFN      | RPL18    |
| RPL13A                                    | RPS5                 | SIRPG                                                               | TSHZ2             | RPL12P4  | TRPM2      | CTA       | TTC28    | APOBEC3C  | RPL3     |
| TNRC6B                                    | EP300                | TMSB4X                                                              | DYNLT3            | WDR45    | TTC3P1     | PGAM4     | XIAP     | MT        |          |
| GOBPID                                    | Pvalue               | OddsRatio                                                           | ExpCount          | Count    | Size       | Term      |          |           |          |
| GO:0006415                                | 2.00188708910009e-27 | 39.5168344324887                                                    | 0.963462736142828 |          |            |           |          |           |          |
| 24                                        | 91                   | translational termination                                           |                   |          |            |           |          |           |          |
| GO:0006414                                | 2.61881020490939e-27 | 34.7119140625                                                       | 1.11168777247249  | 25       |            |           |          |           |          |
| 105                                       |                      | translational elongation                                            |                   |          |            |           |          |           |          |
| GO:0070972                                | 6.27573902089993e-26 | 29.8324092741935                                                    | 1.24932530620718  |          |            |           |          |           |          |
| 25                                        | 118                  | protein localization to endoplasmic reticulum                       |                   |          |            |           |          |           |          |
| GO:0006614                                | 8.92408816331945e-26 | 32.6546080964686                                                    | 1.11168777247249  |          |            |           |          |           |          |
| 24                                        | 105                  | SRP-dependent cotranslational protein targeting to membrane         |                   |          |            |           |          |           |          |
| GO:0006613                                | 1.14365709279469e-25 | 32.2541123085649                                                    | 1.12227527506747  |          |            |           |          |           |          |
| 24                                        | 106                  | cotranslational protein targeting to membrane                       |                   |          |            |           |          |           |          |
| GO:0045047                                | 1.14365709279469e-25 | 32.2541123085649                                                    | 1.12227527506747  |          |            |           |          |           |          |
| 24                                        | 106                  | protein targeting to ER                                             |                   |          |            |           |          |           |          |
| GO:0072599                                | 1.14365709279469e-25 | 32.2541123085649                                                    | 1.12227527506747  |          |            |           |          |           |          |
| 24                                        | 106                  | establishment of protein localization to endoplasmic reticulum      |                   |          |            |           |          |           |          |
| GO:0019080                                | 1.85168014270543e-24 | 23.2124724409449                                                    | 1.5987128918414   | 26       |            |           |          |           |          |
| 151                                       |                      | viral genome expression                                             |                   |          |            |           |          |           |          |
| GO:0019083                                | 1.85168014270543e-24 | 23.2124724409449                                                    | 1.5987128918414   | 26       |            |           |          |           |          |
| 151                                       |                      | viral transcription                                                 |                   |          |            |           |          |           |          |
| GO:0000184                                | 2.28689541570279e-24 | 27.8149326805386                                                    | 1.25991280880216  |          |            |           |          |           |          |
| 24                                        | 119                  | nuclear-transcribed mRNA catabolic process, nonsense-mediated decay |                   |          |            |           |          |           |          |
| GO:0006413                                | 5.03204695328668e-23 | 21.7934916338583                                                    | 1.60930039443637  |          |            |           |          |           |          |
| 25                                        | 152                  | translational initiation                                            |                   |          |            |           |          |           |          |
| GO:0000956                                | 7.67853154865473e-22 | 19.1975911458333                                                    | 1.78928793855097  |          |            |           |          |           |          |
| 25                                        | 169                  | nuclear-transcribed mRNA catabolic process                          |                   |          |            |           |          |           |          |
| GO:0006612                                | 1.27275227658944e-21 | 20.434829637642                                                     | 1.61988789703135  | 24       |            |           |          |           |          |
| 153                                       |                      | protein targeting to membrane                                       |                   |          |            |           |          |           |          |
| GO:0043624                                | 1.27275227658944e-21 | 20.434829637642                                                     | 1.61988789703135  | 24       |            |           |          |           |          |
| 153                                       |                      | cellular protein complex disassembly                                |                   |          |            |           |          |           |          |
| GO:0034623                                | 1.61290482923462e-21 | 18.5468225671141                                                    | 1.84222545152585  |          |            |           |          |           |          |
| 25                                        | 174                  | cellular macromolecular complex disassembly                         |                   |          |            |           |          |           |          |
| GO:0043241                                | 2.80985180226919e-21 | 19.6653939604304                                                    | 1.67282541000623  |          |            |           |          |           |          |

STable4\_20PerPair

|                                           |        |                                                                     |                  |                   |       |                   |          |                  |          |
|-------------------------------------------|--------|---------------------------------------------------------------------|------------------|-------------------|-------|-------------------|----------|------------------|----------|
| 24                                        | 158    | protein complex disassembly                                         |                  |                   |       |                   |          |                  |          |
| GO:0006402                                |        | 2.87041207150359e-21                                                | 18.0568321078431 |                   |       |                   |          | 1.88457546190575 |          |
| 25                                        | 178    | mRNA catabolic process                                              |                  |                   |       |                   |          |                  |          |
| GO:0032984                                |        | 3.30768958865989e-21                                                | 17.9383116883117 |                   |       |                   |          | 1.89516296450073 |          |
| 25                                        | 179    | macromolecular complex disassembly                                  |                  |                   |       |                   |          |                  |          |
| GO:0006401                                |        | 6.19080285127836e-21                                                | 16.1480666871948 |                   |       |                   |          | 2.17043803197011 |          |
| 26                                        | 205    | RNA catabolic process                                               |                  |                   |       |                   |          |                  |          |
| GO:0019058                                |        | 9.13479201410615e-21                                                | 14.8046218487395 |                   |       |                   |          | 2.44571309943949 |          |
| 27                                        | 231    | viral infectious cycle                                              |                  |                   |       |                   |          |                  |          |
| GO:0072594                                |        | 8.76506838445195e-20                                                | 15.4056826117318 |                   |       |                   |          | 2.15985052937513 |          |
| 25                                        | 204    | establishment of protein localization to organelle                  |                  |                   |       |                   |          |                  |          |
| GO:0022415                                |        | 2.08452272859195e-19                                                | 12.9353157572042 |                   |       |                   |          | 2.75275067469379 |          |
| 27                                        | 260    | viral reproductive process                                          |                  |                   |       |                   |          |                  |          |
| GO:0071845                                |        | 2.0795496701577e-18                                                 | 11.707337409672  | 3.00685073697322  |       |                   |          |                  | 27       |
| 284                                       |        | cellular component disassembly at cellular level                    |                  |                   |       |                   |          |                  |          |
| GO:0022411                                |        | 2.98547399506604e-18                                                | 11.5246305418719 |                   |       |                   |          | 3.04920074735312 |          |
| 27                                        | 288    | cellular component disassembly                                      |                  |                   |       |                   |          |                  |          |
| GO:0016032                                |        | 5.64076217151945e-17                                                | 8.39613583138173 |                   |       |                   |          | 4.77496367033423 |          |
| 31                                        | 451    | viral reproduction                                                  |                  |                   |       |                   |          |                  |          |
| GO:0033365                                |        | 2.15625534068943e-16                                                | 7.96558118833914 |                   |       |                   |          | 5.00788872742371 |          |
| 31                                        | 473    | protein localization to organelle                                   |                  |                   |       |                   |          |                  |          |
| GO:0006605                                |        | 1.37190566205482e-14                                                | 7.28048205871693 |                   |       |                   |          | 5.01847623001868 |          |
| 29                                        | 474    | protein targeting                                                   |                  |                   |       |                   |          |                  |          |
| GO:0042274                                |        | 9.55270984107701e-07                                                | 37.1231808731809 |                   |       |                   |          | 0.19057504670957 |          |
| 5                                         | 18     | ribosomal small subunit biogenesis                                  |                  |                   |       |                   |          |                  |          |
| Tissue: whole_Blood=>Adipose_Subcutaneous |        |                                                                     |                  | Type: asymmetric  |       |                   |          |                  |          |
| SourceGene:                               |        | KIR3DL2(ENSG00000240403.1)                                          |                  |                   |       |                   |          |                  |          |
| TargetGeneSet:                            |        | RPS8                                                                | RP11             | RPL32             | RPL29 | RPL35A            | C4orf52  | PAIP2            | CTB      |
| RPS14                                     | GUSBP2 | SNORA20                                                             | RPL7             | EIF3H             | EEF1D | RPS6              | CLTA     | BLOC1S2          | CKAP5    |
| ARPC3                                     | TPT1   | CGRRF1                                                              | RPS3AP6          | RPS27L            | RPLP1 | RPS17L            | C16orf13 |                  | RPL13    |
| SUPT6H                                    | RPL23A | C18orf32                                                            |                  | SCARNA18          |       | RPS15             | RPL18    | DHDH             | GYG2-AS1 |
| RPS4X                                     | RPL10  |                                                                     |                  |                   |       |                   |          |                  |          |
| GOBPID                                    | Pvalue | OddsRatio                                                           | ExpCount         | Count             | Size  | Term              |          |                  |          |
| GO:0006414                                |        | 2.44776479587428e-27                                                | 184.038523274478 |                   |       | 0.21797799460245  |          |                  |          |
| 16                                        | 105    | translational elongation                                            |                  |                   |       |                   |          |                  |          |
| GO:0006413                                |        | 1.0044230277057e-26                                                 | 138.382905982906 |                   |       | 0.315549096948308 |          |                  |          |
| 17                                        | 152    | translational initiation                                            |                  |                   |       |                   |          |                  |          |
| GO:0006415                                |        | 4.15583656027707e-26                                                | 188.75           | 0.18891426198879  |       |                   | 15       | 91               |          |
|                                           |        | translational termination                                           |                  |                   |       |                   |          |                  |          |
| GO:0006614                                |        | 4.16102202144838e-25                                                | 159.233333333333 |                   |       | 0.21797799460245  |          |                  |          |
| 15                                        | 105    | SRP-dependent cotranslational protein targeting to membrane         |                  |                   |       |                   |          |                  |          |
| GO:0006613                                |        | 4.84215706330037e-25                                                | 157.472527472527 |                   |       | 0.220053975503425 |          |                  |          |
| 15                                        | 106    | cotranslational protein targeting to membrane                       |                  |                   |       |                   |          |                  |          |
| GO:0045047                                |        | 4.84215706330037e-25                                                | 157.472527472527 |                   |       | 0.220053975503425 |          |                  |          |
| 15                                        | 106    | protein targeting to ER                                             |                  |                   |       |                   |          |                  |          |
| GO:0072599                                |        | 4.84215706330037e-25                                                | 157.472527472527 |                   |       | 0.220053975503425 |          |                  |          |
| 15                                        | 106    | establishment of protein localization to endoplasmic reticulum      |                  |                   |       |                   |          |                  |          |
| GO:0070972                                |        | 2.67004705690014e-24                                                | 139.009708737864 |                   |       | 0.244965746315134 |          |                  |          |
| 15                                        | 118    | protein localization to endoplasmic reticulum                       |                  |                   |       |                   |          |                  |          |
| GO:0000184                                |        | 3.05215497429842e-24                                                | 137.663461538462 |                   |       | 0.24704172721611  |          |                  |          |
| 15                                        | 119    | nuclear-transcribed mRNA catabolic process, nonsense-mediated decay |                  |                   |       |                   |          |                  |          |
| GO:0019080                                |        | 1.28839226808516e-22                                                | 105.036764705882 |                   |       | 0.313473116047332 |          |                  |          |
| 15                                        | 151    | viral genome expression                                             |                  |                   |       |                   |          |                  |          |
| GO:0019083                                |        | 1.28839226808516e-22                                                | 105.036764705882 |                   |       | 0.313473116047332 |          |                  |          |
| 15                                        | 151    | viral transcription                                                 |                  |                   |       |                   |          |                  |          |
| GO:0006612                                |        | 1.58172070029641e-22                                                | 103.5            | 0.317625077849284 |       |                   | 15       | 153              |          |
|                                           |        | protein targeting to membrane                                       |                  |                   |       |                   |          |                  |          |
| GO:0043624                                |        | 1.58172070029641e-22                                                | 103.5            | 0.317625077849284 |       |                   | 15       | 153              |          |
|                                           |        | cellular protein complex disassembly                                |                  |                   |       |                   |          |                  |          |
| GO:0043241                                |        | 2.60941149443229e-22                                                | 99.8461538461538 |                   |       | 0.328004982354162 |          |                  |          |
| 15                                        | 158    | protein complex disassembly                                         |                  |                   |       |                   |          |                  |          |
| GO:0000956                                |        | 7.41763287803991e-22                                                | 92.6428571428571 |                   |       | 0.350840772264895 |          |                  |          |
| 15                                        | 169    | nuclear-transcribed mRNA catabolic process                          |                  |                   |       |                   |          |                  |          |

Stable4\_20PerPair

|                                           |                                                    |                        |                    |
|-------------------------------------------|----------------------------------------------------|------------------------|--------------------|
| GO:0034623                                | 1.16489622571921e-21                               | 89.6981132075472       | 0.361220676769774  |
| 15 174                                    | cellular macromolecular complex disassembly        |                        |                    |
| GO:0006402                                | 1.65528529282346e-21                               | 87.4723926380368       | 0.369524600373677  |
| 15 178                                    | mRNA catabolic process                             |                        |                    |
| GO:0032984                                | 1.80490563505889e-21                               | 86.9329268292683       | 0.371600581274652  |
| 15 179                                    | macromolecular complex disassembly                 |                        |                    |
| GO:0072594                                | 1.34993586502559e-20                               | 75.3015873015873       | 0.423500103799045  |
| 15 204                                    | establishment of protein localization to organelle |                        |                    |
| GO:0006401                                | 1.45507429475967e-20                               | 74.9 0.425576084700021 | 15 205             |
| RNA catabolic process                     |                                                    |                        |                    |
| GO:0019058                                | 9.03282815920188e-20                               | 65.7638888888889       | 0.479551588125389  |
| 15 231                                    | viral infectious cycle                             |                        |                    |
| GO:0022415                                | 5.45410010289999e-19                               | 57.8612244897959       | 0.539755034253685  |
| 15 260                                    | viral reproductive process                         |                        |                    |
| GO:0071845                                | 2.07466875589035e-18                               | 52.6096654275093       | 0.589578575877102  |
| 15 284                                    | cellular component disassembly at cellular level   |                        |                    |
| GO:0022411                                | 2.56240539447568e-18                               | 51.8241758241758       | 0.597882499481005  |
| 15 288                                    | cellular component disassembly                     |                        |                    |
| GO:0016032                                | 2.08323179173028e-15                               | 32.0756880733945       | 0.936267386340046  |
| 15 451                                    | viral reproduction                                 |                        |                    |
| GO:0033365                                | 4.20956060763729e-15                               | 30.4868995633188       | 0.981938966161511  |
| 15 473                                    | protein localization to organelle                  |                        |                    |
| GO:0006605                                | 4.34277122235995e-15                               | 30.4183006535948       | 0.984014947062487  |
| 15 474                                    | protein targeting                                  |                        |                    |
| GO:0042274                                | 2.28326335864882e-10                               | 221.661538461538       | 0.0373676562175628 |
| 5 18                                      | ribosomal small subunit biogenesis                 |                        |                    |
| GO:0006364                                | 1.44839609929631e-09                               | 44.9430748543254       | 0.215902013701474  |
| 7 104                                     | rRNA processing                                    |                        |                    |
| GO:0016072                                | 2.15150248907704e-09                               | 42.3073026593499       | 0.228357899107328  |
| 7 110                                     | rRNA metabolic process                             |                        |                    |
| GO:0022613                                | 1.32899350087514e-08                               | 23.8022622538752       | 0.467095702719535  |
| 8 225                                     | ribonucleoprotein complex biogenesis               |                        |                    |
| GO:0042254                                | 1.79491152814987e-08                               | 30.6041028781384       | 0.309321154245381  |
| 7 149                                     | ribosome biogenesis                                |                        |                    |
| GO:0071843                                | 2.12892620731648e-08                               | 22.3376623376623       | 0.496159435333195  |
| 8 239                                     | cellular component biogenesis at cellular level    |                        |                    |
| GO:0034470                                | 1.36107562520756e-07                               | 22.4365848164001       | 0.415196180195142  |
| 7 200                                     | ncRNA processing                                   |                        |                    |
| GO:0000028                                | 1.60796442683759e-07                               | 534 0.0124558854058543 | 3 6                |
| ribosomal small subunit assembly          |                                                    |                        |                    |
| GO:0034660                                | 1.48766010544459e-06                               | 15.4834219580857       | 0.591654556778078  |
| 7 285                                     | ncRNA metabolic process                            |                        |                    |
| GO:0042255                                | 4.43961160337844e-06                               | 123.145299145299       | 0.0332156944156114 |
| 3 16                                      | ribosome assembly                                  |                        |                    |
| Tissue: whole_Blood=>Adipose_Subcutaneous |                                                    | Type: asymmetric       |                    |

STable4\_20PerPair

SourceGene: MRPL53P1(ENSG00000235299.1) MRPL53P1 mitochondrial ribosomal protein L53 pseudogene 1

|                |         |           |        |           |          |         |            |           |         |      |
|----------------|---------|-----------|--------|-----------|----------|---------|------------|-----------|---------|------|
| TargetGeneSet: | C1orf86 | RPL22     | ICMT   | RP11      | LDLRAD2  | HSPG2   | RPL11      | ARID1A    |         |      |
| KPNA7          | RP1     | KDM4A     | RPS8   | RP4       | PTGES3P1 | RPL5    | JTB        | RPS27     |         |      |
| UBAP2L         | MTX1    | MIR555    | MEF2D  | RPS7      | PPP1CB   | CALM2   | UBC        | AAK1      | GMCL1   |      |
| DGUOK-AS1      |         | EIF5B     | RANBP2 | UGGT1     | MYO1C    | SENP2   | EEF1B2     | TRIP12    | GIGYF2  |      |
| TRAF3IP1       |         | BRK1      | UBE2E1 | GORASP1   | DALRD3   | RAD54L2 | RPL29      | RPL24     | ABTB1   | RYK  |
| ACTG1P1        | PDCD10  | DNAJC19   | PSMD2  | 7SK       | PPP1R2   | NOP14   | MAN2B2     | RPL34     | NDUFC1  |      |
| RPS3A          | FBXO8   | NPR3      | CTD    | NDUFAF2   | CHCHD2P2 |         | COX7C      | HINT1     | UBE2B   | CTB  |
| MTND5P11       |         | PAIP2     | RPS14  | RPL15P3   | NOL7     | DEK     | GPLD1      | ABT1      | RPS10   |      |
| MTRNR2L9       |         | WDR11     | MRPS12 | MALSU1    | MPLKIP   | CHCHD2  | RPS3AP26   |           | CUX1    |      |
| SLC26A4        | RPL7    | MED30     | EEF1D  | RPL8      | RPS6     | NDUFB6  | CLTA       | NIPSNAP3A |         |      |
| RPL35          | ZNF79   | RPL12     | NUP188 | RPL7A     | NACC2    | PRINS   | RPS24      | RPS3AP5   | MRPL43  | SUFU |
| FAM53B         | NUP98   | PRKCDBP   | RPL27A | MTRNR2L8  |          | PIGCP1  | CKAP5      | C11orf31  |         | DDB1 |
| BAD            | C11orf2 | RNASEH2C  |        | CCDC85B   | TMEM126B |         | TMEM126A   |           | SDHD    |      |
| BACE1          | UBE4A   | DDX6      | RPS25  | USP5      | PFDN5    | HOXC8   | CBX5       | OS9       | GNS     | EEA1 |
| RPL18AP3       |         | CUX2      | ACADS  | PARP4-AS1 |          | TPT1    | MYCBP2-AS1 |           | DNAJC3  |      |
| HMGB3P4        | CHD8    | C14orf21  |        | C14orf28  |          | CGRRF1  | YLPM1      | CCNK      | SIVA1   |      |
| GOLGA8IP       |         | MGA       | SNAP23 | DUT       | RPS3AP6  | RPS27L  | PIAS1      | RPLP1     | MORF4L1 |      |
| SEC11A         | MRPL46  | MPG       | MRPL28 | FAM173A   | SPSB3    | MPV17L  | ABCC1      | RPS15A    | SRCAP   |      |
| NFATC3         | HSBP1   | RPL13     | VPS53  | METTL16   | RNASEK   | POLR2A  | TP53       | LSMD1     | VAMP2   |      |
| RPL26          | TRIM16  | NCOR1     | SUPT6H | RPL23A    | NUFIP2   | RPL19   | WIPF2      | RPL27     | DHX8    |      |
| MED13          | BPTF    | NT5C      | TNRC6C | C18orf32  |          | RPL17   | ATP5D      | RPS15     | UQCR11  |      |
| FAM108A1       |         | NFIC      | RPL36  | NDUFA11   | TRAPPC5  | SLC35E1 | PGLS       | C19orf60  |         |      |
| RPSAP58        | HSPB6   | RPS19     | POU2F2 | ZNF428    | SLC1A5   | RPL18   | RPL13A     | ZNF587    | ZSCAN22 | RPS5 |
| GAPDHP2        | HM13    | KIF3B     | SCAND1 | SOGA1     | TOP1     | NCOA3   | TSHZ2      | DGCR2     | DGCR6L  |      |
| FAM211B        | CTA     | HMGB1P10  |        | NF2       | PRR14L   | MPST    | APOBEC3C   |           | RPL3    |      |
| EP300          | DYNLT3  | WASF4P    | WDR45  | APOOL     | RPL39    | BCORL1  | MT         |           |         |      |
| GOBPID         | Pvalue  | OddsRatio |        | ExpCount  |          | Count   | Size       | Term      |         |      |

STable4\_20PerPair

|                          |          |             |             |    |     |
|--------------------------|----------|-------------|-------------|----|-----|
| GO:0006414               | 3.73E-49 | 59.03534304 | 1.365995433 | 40 | 105 |
| translational elongation |          |             |             |    |     |

|                           |          |             |             |    |    |
|---------------------------|----------|-------------|-------------|----|----|
| GO:0006415                | 1.46E-48 | 67.92201258 | 1.183862708 | 38 | 91 |
| translational termination |          |             |             |    |    |

STable4\_20PerPair

|                                                             |          |             |             |    |     |
|-------------------------------------------------------------|----------|-------------|-------------|----|-----|
| GO:0006614                                                  | 2.16E-47 | 56.30292862 | 1.365995433 | 39 | 105 |
| SRP-dependent cotranslational protein targeting to membrane |          |             |             |    |     |

|                                               |          |             |             |    |     |
|-----------------------------------------------|----------|-------------|-------------|----|-----|
| GO:0006613                                    | 3.38E-47 | 55.45867976 | 1.379004913 | 39 | 106 |
| cotranslational protein targeting to membrane |          |             |             |    |     |

|                         |          |             |             |    |     |
|-------------------------|----------|-------------|-------------|----|-----|
| GO:0045047              | 3.38E-47 | 55.45867976 | 1.379004913 | 39 | 106 |
| protein targeting to ER |          |             |             |    |     |

STable4\_20PerPair

|                                                                |          |             |             |    |     |
|----------------------------------------------------------------|----------|-------------|-------------|----|-----|
| GO:0072599                                                     | 3.38E-47 | 55.45867976 | 1.379004913 | 39 | 106 |
| establishment of protein localization to endoplasmic reticulum |          |             |             |    |     |

|                                               |          |             |             |    |     |
|-----------------------------------------------|----------|-------------|-------------|----|-----|
| GO:0070972                                    | 1.03E-46 | 49.15107415 | 1.535118677 | 40 | 118 |
| protein localization to endoplasmic reticulum |          |             |             |    |     |

|                                                                       |          |             |             |    |     |
|-----------------------------------------------------------------------|----------|-------------|-------------|----|-----|
| GO:0000184                                                            | 3.34E-43 | 44.35522634 | 1.548128157 | 38 | 119 |
| "nuclear-transcribed mRNA catabolic process, nonsense-mediated decay" |          |             |             |    |     |



STable4\_20PerPair

|                         |          |             |             |    |     |
|-------------------------|----------|-------------|-------------|----|-----|
| GO:0019080              | 8.74E-42 | 34.45824203 | 1.964431527 | 40 | 151 |
| viral genome expression |          |             |             |    |     |

|                     |          |             |             |    |     |
|---------------------|----------|-------------|-------------|----|-----|
| GO:0019083          | 8.74E-42 | 34.45824203 | 1.964431527 | 40 | 151 |
| viral transcription |          |             |             |    |     |

STable4\_20PerPair

|                          |          |             |             |    |     |
|--------------------------|----------|-------------|-------------|----|-----|
| GO:0006413               | 1.17E-41 | 34.14816602 | 1.977441008 | 40 | 152 |
| translational initiation |          |             |             |    |     |

|                               |          |             |             |    |     |
|-------------------------------|----------|-------------|-------------|----|-----|
| GO:0006612                    | 1.57E-41 | 33.84357809 | 1.990450488 | 40 | 153 |
| protein targeting to membrane |          |             |             |    |     |

|                                      |          |            |             |    |     |
|--------------------------------------|----------|------------|-------------|----|-----|
| GO:0043624                           | 1.68E-38 | 31.1666087 | 1.990450488 | 38 | 153 |
| cellular protein complex disassembly |          |            |             |    |     |

STable4\_20PerPair

|                                            |          |            |             |    |     |
|--------------------------------------------|----------|------------|-------------|----|-----|
| GO:0000956                                 | 3.73E-38 | 28.4557047 | 2.198602173 | 39 | 169 |
| nuclear-transcribed mRNA catabolic process |          |            |             |    |     |

|                             |          |             |             |    |     |
|-----------------------------|----------|-------------|-------------|----|-----|
| GO:0043241                  | 6.45E-38 | 29.85744444 | 2.055497889 | 38 | 158 |
| protein complex disassembly |          |             |             |    |     |

|                                             |          |             |             |    |     |
|---------------------------------------------|----------|-------------|-------------|----|-----|
| GO:0034623                                  | 1.28E-37 | 27.39209545 | 2.263649574 | 39 | 174 |
| cellular macromolecular complex disassembly |          |             |             |    |     |

STable4\_20PerPair

|                                                    |          |            |             |    |     |  |
|----------------------------------------------------|----------|------------|-------------|----|-----|--|
| GO:0072594                                         | 1.76E-37 | 24.1267059 | 2.653933984 | 41 | 204 |  |
| establishment of protein localization to organelle |          |            |             |    |     |  |

|                   |          |             |             |    |     |      |
|-------------------|----------|-------------|-------------|----|-----|------|
| GO:0006402        | 3.34E-37 | 26.59630148 | 2.315687496 | 39 | 178 | mRNA |
| catabolic process |          |             |             |    |     |      |

STable4\_20PerPair

|                                    |          |             |             |    |     |
|------------------------------------|----------|-------------|-------------|----|-----|
| GO:0032984                         | 4.23E-37 | 26.40445829 | 2.328696976 | 39 | 179 |
| macromolecular complex disassembly |          |             |             |    |     |

|                   |          |             |             |    |     |     |
|-------------------|----------|-------------|-------------|----|-----|-----|
| GO:0006401        | 5.17E-36 | 23.09254709 | 2.666943464 | 40 | 205 | RNA |
| catabolic process |          |             |             |    |     |     |

|                        |          |             |             |    |     |
|------------------------|----------|-------------|-------------|----|-----|
| GO:0019058             | 3.75E-35 | 20.65853921 | 3.005189952 | 41 | 231 |
| viral infectious cycle |          |             |             |    |     |

STable4\_20PerPair

|                            |          |             |             |    |     |
|----------------------------|----------|-------------|-------------|----|-----|
| GO:0022415                 | 3.04E-34 | 18.53368104 | 3.382464881 | 42 | 260 |
| viral reproductive process |          |             |             |    |     |

|                                   |          |             |             |    |     |
|-----------------------------------|----------|-------------|-------------|----|-----|
| GO:0033365                        | 1.09E-30 | 11.50588774 | 6.153484188 | 49 | 473 |
| protein localization to organelle |          |             |             |    |     |

STable4\_20PerPair

|                   |          |             |             |    |     |
|-------------------|----------|-------------|-------------|----|-----|
| GO:0006605        | 1.21E-30 | 11.47798561 | 6.166493668 | 49 | 474 |
| protein targeting |          |             |             |    |     |

|                    |          |             |             |    |     |
|--------------------|----------|-------------|-------------|----|-----|
| GO:0016032         | 1.39E-30 | 11.79156328 | 5.867275621 | 48 | 451 |
| viral reproduction |          |             |             |    |     |

|                                                  |          |             |             |    |     |
|--------------------------------------------------|----------|-------------|-------------|----|-----|
| GO:0071845                                       | 5.39E-29 | 14.97608547 | 3.694692409 | 39 | 284 |
| cellular component disassembly at cellular level |          |             |             |    |     |

STable4\_20PerPair

|                                |          |             |            |    |     |
|--------------------------------|----------|-------------|------------|----|-----|
| GO:0022411                     | 9.29E-29 | 14.73130104 | 3.74673033 | 39 | 288 |
| cellular component disassembly |          |             |            |    |     |

|                                    |          |             |             |   |    |
|------------------------------------|----------|-------------|-------------|---|----|
| GO:0042274                         | 3.87E-13 | 79.63128492 | 0.234170646 | 9 | 18 |
| ribosomal small subunit biogenesis |          |             |             |   |    |

|                     |          |             |             |    |     |
|---------------------|----------|-------------|-------------|----|-----|
| GO:0042254          | 9.43E-10 | 9.142222414 | 1.938412567 | 15 | 149 |
| ribosome biogenesis |          |             |             |    |     |



STable4\_20PerPair

|                                      |          |             |            |    |     |  |
|--------------------------------------|----------|-------------|------------|----|-----|--|
| GO:0022613                           | 5.89E-09 | 6.717695682 | 2.92713307 | 17 | 225 |  |
| ribonucleoprotein complex biogenesis |          |             |            |    |     |  |

|            |          |             |             |    |     |      |
|------------|----------|-------------|-------------|----|-----|------|
| GO:0006364 | 1.01E-08 | 10.50222332 | 1.352985953 | 12 | 104 | rRNA |
| processing |          |             |             |    |     |      |

STable4\_20PerPair

|                                                 |          |             |             |    |     |  |
|-------------------------------------------------|----------|-------------|-------------|----|-----|--|
| GO:0071843                                      | 1.46E-08 | 6.287787788 | 3.109265795 | 17 | 239 |  |
| cellular component biogenesis at cellular level |          |             |             |    |     |  |

|                   |          |             |             |    |     |      |
|-------------------|----------|-------------|-------------|----|-----|------|
| GO:0016072        | 1.92E-08 | 9.855055659 | 1.431042834 | 12 | 110 | rRNA |
| metabolic process |          |             |             |    |     |      |

|                                    |          |            |             |   |    |  |
|------------------------------------|----------|------------|-------------|---|----|--|
| GO:0042273                         | 2.60E-07 | 55.6440281 | 0.156113764 | 5 | 12 |  |
| ribosomal large subunit biogenesis |          |            |             |   |    |  |

STable4\_20PerPair

|                        |          |             |             |    |     |
|------------------------|----------|-------------|-------------|----|-----|
| GO:0030490             | 9.42E-07 | 103.3333333 | 0.091066362 | 4  | 7   |
| maturation of SSU-rRNA |          |             |             |    |     |
| GO:0034470             | 1.20E-05 | 5.104569632 | 2.601896063 | 12 | 200 |
| ncRNA processing       |          |             |             |    |     |

Stable4\_20PerPair

| TargetGeneSet: | C1orf86 | RPL22                                                               | ICMT   | RP11             | LDLRAD2  | HSPG2            | RPL11      | ARID1A    |         |      |
|----------------|---------|---------------------------------------------------------------------|--------|------------------|----------|------------------|------------|-----------|---------|------|
| KPNA7          | RP1     | KDM4A                                                               | RPS8   | RP4              | PTGES3P1 | RPL5             | JTB        | RPS27     |         |      |
| UBAP2L         | MTX1    | MIR555                                                              | MEF2D  | RPS7             | PPP1CB   | CALM2            | UBC        | AAK1      | GMCL1   |      |
| DGUOK-AS1      |         | EIF5B                                                               | RANBP2 | UGGT1            | MYO1C    | SEN2             | EEF1B2     | TRIP12    | GIGYF2  |      |
| TRAF3IP1       |         | BRK1                                                                | UBE2E1 | GORASP1          | DALRD3   | RAD54L2          | RPL29      | RPL24     | ABTB1   | RYK  |
| ACTG1P1        | PDCD10  | DNAJC19                                                             | PSMD2  | 7SK              | PPP1R2   | NOP14            | MAN2B2     | RPL34     | NDUFC1  |      |
| RPS3A          | FBXO8   | NPR3                                                                | CTD    | NDUF2F2          | CHCHD2P2 | COX7C            | HINT1      | UBE2B     | CTB     |      |
| MTND5P11       |         | PAIP2                                                               | RPS14  | RPL15P3          | NOL7     | DEK              | GPLD1      | ABT1      | RPS10   |      |
| MTRNR2L9       |         | WDR11                                                               | MRPS12 | MALSU1           | MPLKIP   | CHCHD2           | RPS3AP26   |           | CUX1    |      |
| SLC26A4        | RPL7    | MED30                                                               | EEF1D  | RPL8             | RPS6     | NDUFB6           | CLTA       | NIPSNAP3A |         |      |
| RPL35          | ZNF79   | RPL12                                                               | NUP188 | RPL7A            | NACC2    | PRINS            | RPS24      | RPS3AP5   | MRPL43  | SUFU |
| FAM53B         | NUP98   | PRKCDBP                                                             | RPL27A | MTRNR2L8         |          | PIGCP1           | CKAP5      | C11orf31  |         | DDB1 |
| BAD            | C11orf2 | RNASEH2C                                                            |        | CCDC85B          | TMEM126B |                  | TMEM126A   |           | SDHD    |      |
| BACE1          | UBE4A   | DDX6                                                                | RPS25  | USP5             | PFDN5    | HOXC8            | CBX5       | OS9       | GNS     | EEA1 |
| RPL18AP3       |         | CUX2                                                                | ACADS  | PARP4-AS1        |          | TPT1             | MYCBP2-AS1 |           | DNAJC3  |      |
| HMGB3P4        | CHD8    | C14orf21                                                            |        | C14orf28         |          | CGRRF1           | YLPM1      | CCNK      | SIVA1   |      |
| GOLGA8IP       |         | MGA                                                                 | SNAP23 | DUT              | RPS3AP6  | RPS27L           | PIAS1      | RPLP1     | MORF4L1 |      |
| SEC11A         | MRPL46  | MPG                                                                 | MRPL28 | FAM173A          | SPSB3    | MPV17L           | ABCC1      | RPS15A    | SRCAP   |      |
| NFATC3         | HSBP1   | RPL13                                                               | VPS53  | METTLL16         | RNASEK   | POLR2A           | TP53       | LSMD1     | VAMP2   |      |
| RPL26          | TRIM16  | NCOR1                                                               | SUPT6H | RPL23A           | NUFIP2   | RPL19            | WIPF2      | RPL27     | DHX8    |      |
| MED13          | BPTF    | NT5C                                                                | TNRC6C | C18orf32         |          | RPL17            | ATP5D      | RPS15     | UQCR11  |      |
| FAM108A1       |         | NFIC                                                                | RPL36  | NDUFA11          | TRAPPC5  | SLC35E1          | PGLS       | C19orf60  |         |      |
| RPSAP58        | HSPB6   | RPS19                                                               | POU2F2 | ZNF428           | SLC1A5   | RPL18            | RPL13A     | ZNF587    | ZSCAN22 | RPS5 |
| GAPDHP2        | HM13    | KIF3B                                                               | SCAND1 | SOGA1            | TOP1     | NCOA3            | TSHZ2      | DGCR2     | DGCR6L  |      |
| FAM211B        | CTA     | HMGB1P10                                                            |        | NF2              | PRR14L   | MPST             | APOBEC3C   |           | RPL3    |      |
| EP300          | DYNLT3  | WASF4P                                                              | WDR45  | APOOL            | RPL39    | BCORL1           | MT         |           |         |      |
| GOBPID         | Pvalue  | OddsRatio                                                           |        | ExpCount         |          | Count            | Size       | Term      |         |      |
| GO:0006414     |         | 3.73063837383387e-49                                                |        | 59.035343035343  |          | 1.36599543284202 |            |           |         | 40   |
| 105            |         | translational elongation                                            |        |                  |          |                  |            |           |         |      |
| GO:0006415     |         | 1.46340793209755e-48                                                |        | 67.9220125786163 |          | 1.18386270846308 |            |           |         |      |
| 38             | 91      | translational termination                                           |        |                  |          |                  |            |           |         |      |
| GO:0006614     |         | 2.15619985871634e-47                                                |        | 56.3029286150092 |          | 1.36599543284202 |            |           |         |      |
| 39             | 105     | SRP-dependent cotranslational protein targeting to membrane         |        |                  |          |                  |            |           |         |      |
| GO:0006613     |         | 3.37677545824514e-47                                                |        | 55.4586797555845 |          | 1.3790049131548  |            |           |         | 39   |
| 106            |         | cotranslational protein targeting to membrane                       |        |                  |          |                  |            |           |         |      |
| GO:0045047     |         | 3.37677545824514e-47                                                |        | 55.4586797555845 |          | 1.3790049131548  |            |           |         | 39   |
| 106            |         | protein targeting to ER                                             |        |                  |          |                  |            |           |         |      |
| GO:0072599     |         | 3.37677545824514e-47                                                |        | 55.4586797555845 |          | 1.3790049131548  |            |           |         | 39   |
| 106            |         | establishment of protein localization to endoplasmic reticulum      |        |                  |          |                  |            |           |         |      |
| GO:0070972     |         | 1.03199852307688e-46                                                |        | 49.1510741510741 |          | 1.53511867690817 |            |           |         |      |
| 40             | 118     | protein localization to endoplasmic reticulum                       |        |                  |          |                  |            |           |         |      |
| GO:0000184     |         | 3.34093162568094e-43                                                |        | 44.3552263374486 |          | 1.54812815722095 |            |           |         |      |
| 38             | 119     | nuclear-transcribed mRNA catabolic process, nonsense-mediated decay |        |                  |          |                  |            |           |         |      |
| GO:0019080     |         | 8.7395666550836e-42                                                 |        | 34.4582420258096 |          | 1.96443152722995 |            |           |         |      |
| 40             | 151     | viral genome expression                                             |        |                  |          |                  |            |           |         |      |
| GO:0019083     |         | 8.7395666550836e-42                                                 |        | 34.4582420258096 |          | 1.96443152722995 |            |           |         |      |
| 40             | 151     | viral transcription                                                 |        |                  |          |                  |            |           |         |      |
| GO:0006413     |         | 1.17411846562303e-41                                                |        | 34.148166023166  |          | 1.97744100754273 |            |           |         | 40   |
| 152            |         | translational initiation                                            |        |                  |          |                  |            |           |         |      |
| GO:0006612     |         | 1.57369689042792e-41                                                |        | 33.8435780913657 |          | 1.99045048785551 |            |           |         |      |
| 40             | 153     | protein targeting to membrane                                       |        |                  |          |                  |            |           |         |      |
| GO:0043624     |         | 1.68164805971791e-38                                                |        | 31.1666086956522 |          | 1.99045048785551 |            |           |         |      |
| 38             | 153     | cellular protein complex disassembly                                |        |                  |          |                  |            |           |         |      |
| GO:0000956     |         | 3.73184480804594e-38                                                |        | 28.4557046979866 |          | 2.19860217286001 |            |           |         |      |
| 39             | 169     | nuclear-transcribed mRNA catabolic process                          |        |                  |          |                  |            |           |         |      |
| GO:0043241     |         | 6.45243751909214e-38                                                |        | 29.8574444444444 |          | 2.05549788941942 |            |           |         |      |
| 38             | 158     | protein complex disassembly                                         |        |                  |          |                  |            |           |         |      |
| GO:0034623     |         | 1.282854874419e-37                                                  |        | 27.3920954511559 |          | 2.26364957442392 |            |           |         |      |
| 39             | 174     | cellular macromolecular complex disassembly                         |        |                  |          |                  |            |           |         |      |
| GO:0072594     |         | 1.76295983175462e-37                                                |        | 24.1267058970828 |          | 2.65393398380735 |            |           |         |      |
| 41             | 204     | establishment of protein localization to organelle                  |        |                  |          |                  |            |           |         |      |
| GO:0006402     |         | 3.34364130480759e-37                                                |        | 26.5963014823041 |          | 2.31568749567504 |            |           |         |      |
| 39             | 178     | mRNA catabolic process                                              |        |                  |          |                  |            |           |         |      |

Stable4\_20PerPair

|            |                      |                                                  |                    |
|------------|----------------------|--------------------------------------------------|--------------------|
| GO:0032984 | 4.23162209693341e-37 | 26.4044582933845                                 | 2.32869697598782   |
| 39         | 179                  | macromolecular complex disassembly               |                    |
| GO:0006401 | 5.1722689110407e-36  | 23.0925470925471                                 | 2.66694346412013   |
| 40         | 205                  | RNA catabolic process                            |                    |
| GO:0019058 | 3.75419660603351e-35 | 20.6585392051557                                 | 3.00518995225244   |
| 41         | 231                  | viral infectious cycle                           |                    |
| GO:0022415 | 3.03706919772999e-34 | 18.5336810355662                                 | 3.38246488132309   |
| 42         | 260                  | viral reproductive process                       |                    |
| GO:0033365 | 1.09468083270523e-30 | 11.5058877426361                                 | 6.15348418794547   |
| 49         | 473                  | protein localization to organelle                |                    |
| GO:0006605 | 1.20902238516489e-30 | 11.4779856115108                                 | 6.16649366825825   |
| 49         | 474                  | protein targeting                                |                    |
| GO:0016032 | 1.39328519956244e-30 | 11.7915632754342                                 | 5.86727562106429   |
| 48         | 451                  | viral reproduction                               |                    |
| GO:0071845 | 5.39156390596749e-29 | 14.9760854677441                                 | 3.69469240882984   |
| 39         | 284                  | cellular component disassembly at cellular level |                    |
| GO:0022411 | 9.29068973029194e-29 | 14.7313010430986                                 | 3.74673033008096   |
| 39         | 288                  | cellular component disassembly                   |                    |
| GO:0042274 | 3.8721725988671e-13  | 79.6312849162011                                 | 0.23417064563006   |
| 9          | 18                   | ribosomal small subunit biogenesis               |                    |
| GO:0042254 | 9.43006407331837e-10 | 9.14222241394185                                 | 1.93841256660439   |
| 15         | 149                  | ribosome biogenesis                              |                    |
| GO:0022613 | 5.89204997575501e-09 | 6.71769568151147                                 | 2.92713307037575   |
| 17         | 225                  | ribonucleoprotein complex biogenesis             |                    |
| GO:0006364 | 1.00730880064885e-08 | 10.5022233201581                                 | 1.35298595252924   |
| 12         | 104                  | rRNA processing                                  |                    |
| GO:0071843 | 1.45642476614937e-08 | 6.28778778778779                                 | 3.10926579475469   |
| 17         | 239                  | cellular component biogenesis at cellular level  |                    |
| GO:0016072 | 1.91523072560317e-08 | 9.85505565862709                                 | 1.43104283440592   |
| 12         | 110                  | rRNA metabolic process                           |                    |
| GO:0042273 | 2.5989566538941e-07  | 55.6440281030445                                 | 0.156113763753373  |
| 5          | 12                   | ribosomal large subunit biogenesis               |                    |
| GO:0030490 | 9.41895577688388e-07 | 103.333333333333                                 | 0.0910663621894679 |
| 4          | 7                    | maturation of SSU-rRNA                           |                    |
| GO:0034470 | 1.2033717020449e-05  | 5.10456963249516                                 | 2.60189606255622   |
| 12         | 200                  | ncRNA processing                                 |                    |

Tissue: whole\_Blood=>Adipose\_Subcutaneous Type: cluster

SourceGene: MTND1P23(ENSG00000225972.1)

|                |          |           |          |           |          |          |           |         |           |      |
|----------------|----------|-----------|----------|-----------|----------|----------|-----------|---------|-----------|------|
| TargetGeneSet: | MTND1P23 | RPL22     | DDI2     | RP1       | RPL11    | ARID1A   | PRDX3P2   |         |           |      |
| KPNA7          | ZMYM4    | THRAP3    | RPS8     | RP11      | RPL5     | RPRD2    | RPS27     | UBAP2L  | RAB25     | TKT  |
| RPS7           | CALM2    | UBC       | COMMD1   | AAK1      | TMEM131  | EIF5B    | UGGT1     | UBR3    | TRIP12    |      |
| EFHD1          | GIGYF2   | SNED1     | BRK1     | RPL15     | RAD54L2  | RPL29    | KCTD6     | CTD     | TMF1      | PCNP |
| RPL24          | RYK      | GPR87     | PDCD10   | HTT       | BOD1L    | ZBTB12B  | PDGFRA    | CISD2   | RPL34     |      |
| RPS3A          | RHOBTB3  | SKP1      | CTB      | MTND5P11  |          | CSF1R    | RPS14     | LYRM4   | RP3       |      |
| RPL15P3        | AGPAT1   | MTRNR2L9  |          | WDR11     | PHACTR2  | PPP1R14C |           | IGF2R   | STARD3NL  |      |
| RPS3AP26       |          | POLR2J3   | SPDYE2   | TRBV6-5   | CLN8     | KIAA1967 |           | DRP2    | HMBOX1    |      |
| HOOK3          | ASPH     | ARFGEF1   | UBR5     | NFIB      | RPS6     | HMGB3P24 |           | CBWD6   | NIPSNAP3A |      |
| ATP6V1G1       |          | GAPVD1    | RPL12    | SETX      | EEF1A1P5 |          | RPL7A     | SEC16A  | KIAA0913  |      |
| RPS3AP5        | KLLN     | MRPL43    | DUSP5    | RPL27A    | MTRNR2L8 |          | CKAP5     | BTBD18  | CCDC90B   | ATM  |
| FDX1           | UBE4A    | MLL       | DDX6     | RPL23AP64 |          | CD163L1  | SCAF11    | MLL4    | PFDN5     | CBX5 |
| LRP1           | OS9      | GNS       | EEA1     | USP44     | RPL18AP3 |          | RPSAP54   | GTF3A   | TNFSF13B  |      |
| CCNB1IP1       |          | CHD8      | C14orf28 |           | CGRRF1   | YLPM1    | C14orf142 |         | SIVA1     |      |
| C15orf33       |          | USP8      | RPS27L   | UBL7      | SIN3A    | SEC11A   | MPG       | RPS15A  |           |      |
| SLX1B-SULT1A4  |          | LONP2     | FBXL8    | NFATC3    | TERF2    | RPL13    | VPS53     | WDR81   | RPL26     |      |
| RPL23A         | NUFIP2   | TAF15     | RPL19    | CDK12     | RPL27    | MED13    | TNRC6C    | ROCK1P1 | ANKRD12   | DSG1 |
| RPL17          | FAM108A1 |           | NFIC     | C3        | ZNF121   | BRD4     | RPSAP58   | POU2F2  | ZNF526    |      |
| IGFL2          | RPL18    | NUCB1-AS1 |          | RPL13A    | RPS5     | RRBP1    | NCOA3     | TSHZ2   | RPL12P4   |      |
| ICOSLG         | PI4KAP1  | YDJC      | FAM211B  | CTA       | HMGB1P10 |          | TTC28     | EIF3L   | RPL3      |      |
| TNRC6B         | EP300    | TMSB4X    | DYNLT3   | USP9X     | RPS4X    | RLIM     | TTC3P1    | PGAM4   | APOOL     |      |
| DOCK11         | RP13     | RPL10     | MT       |           |          |          |           |         |           |      |

| GOBPID     | Pvalue | OddsRatio | ExpCount             | Count            | Size | Term                      |
|------------|--------|-----------|----------------------|------------------|------|---------------------------|
| GO:0006415 | 30     | 91        | 4.43951750615861e-38 | 59.8696931483817 |      | 0.92567988374507          |
|            |        |           |                      |                  |      | translational termination |

Stable4\_20PerPair

|                                           |                                                             |                                                                     |                  |    |
|-------------------------------------------|-------------------------------------------------------------|---------------------------------------------------------------------|------------------|----|
| GO:0006614                                | 1.29222701416958e-37                                        | 51.3897949673812                                                    | 1.068092173552   | 31 |
| 105                                       | SRP-dependent cotranslational protein targeting to membrane |                                                                     |                  |    |
| GO:0070972                                | 1.75738623577027e-37                                        | 46.0036400404449                                                    | 1.20033215694416 |    |
| 32                                        | 118                                                         | protein localization to endoplasmic reticulum                       |                  |    |
| GO:0006613                                | 1.81205197266399e-37                                        | 50.7010344827586                                                    | 1.07826447996678 |    |
| 31                                        | 106                                                         | cotranslational protein targeting to membrane                       |                  |    |
| GO:0045047                                | 1.81205197266399e-37                                        | 50.7010344827586                                                    | 1.07826447996678 |    |
| 31                                        | 106                                                         | protein targeting to ER                                             |                  |    |
| GO:0072599                                | 1.81205197266399e-37                                        | 50.7010344827586                                                    | 1.07826447996678 |    |
| 31                                        | 106                                                         | establishment of protein localization to endoplasmic reticulum      |                  |    |
| GO:0006414                                | 6.50307642326397e-36                                        | 48.6461538461538                                                    | 1.068092173552   | 30 |
| 105                                       | translational elongation                                    |                                                                     |                  |    |
| GO:0000184                                | 4.50928103369268e-34                                        | 40.9536156727168                                                    | 1.21050446335894 |    |
| 30                                        | 119                                                         | nuclear-transcribed mRNA catabolic process, nonsense-mediated decay |                  |    |
| GO:0006413                                | 1.36605743496636e-33                                        | 32.8904347826087                                                    | 1.54619057504671 |    |
| 32                                        | 152                                                         | translational initiation                                            |                  |    |
| GO:0019080                                | 3.54962424906352e-32                                        | 31.5879310344828                                                    | 1.53601826863193 |    |
| 31                                        | 151                                                         | viral genome expression                                             |                  |    |
| GO:0019083                                | 3.54962424906352e-32                                        | 31.5879310344828                                                    | 1.53601826863193 |    |
| 31                                        | 151                                                         | viral transcription                                                 |                  |    |
| GO:0000956                                | 5.19550891365289e-32                                        | 28.7746112345287                                                    | 1.71911978409799 |    |
| 32                                        | 169                                                         | nuclear-transcribed mRNA catabolic process                          |                  |    |
| GO:0006612                                | 5.50462448728236e-32                                        | 31.065715093273                                                     | 1.55636288146149 | 31 |
| 153                                       | protein targeting to membrane                               |                                                                     |                  |    |
| GO:0006402                                | 3.01707628337748e-31                                        | 26.9836807623585                                                    | 1.81067054183102 |    |
| 32                                        | 178                                                         | mRNA catabolic process                                              |                  |    |
| GO:0043624                                | 1.6843388982562e-30                                         | 29.5622263914947                                                    | 1.55636288146149 |    |
| 30                                        | 153                                                         | cellular protein complex disassembly                                |                  |    |
| GO:0034623                                | 3.82730617094672e-30                                        | 26.4643718350615                                                    | 1.76998131617189 |    |
| 31                                        | 174                                                         | cellular macromolecular complex disassembly                         |                  |    |
| GO:0043241                                | 4.70981669600893e-30                                        | 28.3974358974359                                                    | 1.6072244135354  | 30 |
| 158                                       | protein complex disassembly                                 |                                                                     |                  |    |
| GO:0032984                                | 9.63588371523563e-30                                        | 25.5612767940354                                                    | 1.8208428482458  | 31 |
| 179                                       | macromolecular complex disassembly                          |                                                                     |                  |    |
| GO:0072594                                | 2.88086400958539e-29                                        | 22.8626895854398                                                    | 2.07515050861532 |    |
| 32                                        | 204                                                         | establishment of protein localization to organelle                  |                  |    |
| GO:0006401                                | 3.38706482064813e-29                                        | 22.7289268660467                                                    | 2.0853228150301  | 32 |
| 205                                       | RNA catabolic process                                       |                                                                     |                  |    |
| GO:0019058                                | 3.32502076082512e-26                                        | 18.8458620689655                                                    | 2.34980278181441 |    |
| 31                                        | 231                                                         | viral infectious cycle                                              |                  |    |
| GO:0033365                                | 5.44317706017976e-26                                        | 11.9755671148907                                                    | 4.81150093419141 |    |
| 40                                        | 473                                                         | protein localization to organelle                                   |                  |    |
| GO:0071845                                | 8.04758984305396e-26                                        | 16.2070664709583                                                    | 2.8889350217978  | 33 |
| 284                                       | cellular component disassembly at cellular level            |                                                                     |                  |    |
| GO:0022411                                | 1.2725239793414e-25                                         | 15.9482972136223                                                    | 2.92962424745692 |    |
| 33                                        | 288                                                         | cellular component disassembly                                      |                  |    |
| GO:0022415                                | 1.3202462778126e-24                                         | 16.4254253877428                                                    | 2.64479966784306 |    |
| 31                                        | 260                                                         | viral reproductive process                                          |                  |    |
| GO:0006605                                | 8.78506809219884e-23                                        | 10.6735801955482                                                    | 4.82167324060619 |    |
| 37                                        | 474                                                         | protein targeting                                                   |                  |    |
| GO:0016032                                | 1.83222706237215e-18                                        | 9.22112690671371                                                    | 4.58771019306622 |    |
| 32                                        | 451                                                         | viral reproduction                                                  |                  |    |
| GO:0044257                                | 1.48355496018936e-05                                        | 4.08650458069063                                                    | 4.08926717874196 |    |
| 15                                        | 402                                                         | cellular protein catabolic process                                  |                  |    |
| GO:0022613                                | 1.88883383604748e-05                                        | 5.32538482682793                                                    | 2.28876894332572 |    |
| 11                                        | 225                                                         | ribonucleoprotein complex biogenesis                                |                  |    |
| Tissue: whole_Blood=>Adipose_Subcutaneous |                                                             | Type: cluster                                                       |                  |    |

STable4\_20PerPair

SourceGene: ROCK1P1(ENSG00000263006.1) "Rho-associated, coiled-coil  
containing protein kinase 1 pseudogene 1"

|                |          |         |          |          |          |           |           |          |          |
|----------------|----------|---------|----------|----------|----------|-----------|-----------|----------|----------|
| TargetGeneSet: | MTND1P23 | RPL22   | DNAJC11  | DFFA     | HSPG2    | RPL11     | PAFAH2    |          |          |
| ARID1A         | PRDX3P2  | KPNA7   | THRAP3   | RP1      | RPS8     | RPS15AP10 | RPL5      | RP11     |          |
| RNU1-5         | RPRD2    | RPS27   | UBAP2L   | ARHGEF11 |          | TMEM63A   | UBC       | COMMD1   | GMCL1    |
| DGUOK          | RETSAT   | EIF5B   | UGGT1    | MYO1C    | EEF1B2   | RPL15     | RAD54L2   | RPL29    | PCNP     |
| RPL24          | BOD1L    | ZBTB12B | RPL34    | RPS3A    | MND1     | SNORA47   | HINT1     | SKP1     | CTB      |
| MTND5P11       |          | PCDHGC5 | RPS14    | SLC2A3P1 |          | RPL15P3   | RPS10     | RPL10A   | USP49    |
| MTRNR2L9       |          | WDR11   | KIAA1919 |          | TATDN2P2 |           | IGF2R     | CYP51A1  | RPS3AP26 |
| MLL3           | HOOK3    | RBM12B  | EIF3H    | EEF1D    | RPL8     | RPS6      | NIPSNAP3A |          | GAPVD1   |
| RPL7A          | RPS24    | RPS3AP5 | SFR1     | FAM53B   | RPL27A   | MTRNR2L8  |           | CKAP5    | TMEM126B |
| BACE1          | UBE4A    | DDX6    | SCAF11   | CCDC65   | MLL4     | PFDN5     | PSG1      | CBX5     | LRP1     |
| ARPC3          | VPS29    | RP3     | SBNO1    | TPT1     | HMGB3P4  | CHD8      | ZNF410    | KIAA1737 |          |
| SIVA1          | GOLGA8IP |         | HERC2P10 |          | CCNDBP1  | MORF4L1   | SEC11A    | CTD      | NTAN1    |
| RPS15A         | NFATC3   | RPL13   | VPS53    | RPL26    | SUPT6H   | RPL23A    | RPL19     | WIPF2    | RAMP2    |
| RPL27          | DHX8     | ROCK1P1 | RPL17    | RPS15    | FAM108A1 |           | NFIC      | ZBTB7A   | ZNF121   |
| MAST1          | BRD4     | GLT25D1 | SUPT5H   | MIR642A  | RPL18    | RPL13A    | RPS5      | SCAND1   | EPB41L1  |
| SOGA1          | TSHZ2    | SCAF4   | DGCR6L   | CTA      | RPL3     | EP300     | RP4       | TMSB4X   | DYNLT3   |
| HUWE1          | RPS4X    | APOOL   | XIAP     | HCFC1    | RPL10    | AMELY     | MT        |          |          |

|        |        |           |          |       |      |      |
|--------|--------|-----------|----------|-------|------|------|
| GOBPID | Pvalue | OddsRatio | ExpCount | Count | Size | Term |
|--------|--------|-----------|----------|-------|------|------|

|                          |          |  |             |             |    |     |
|--------------------------|----------|--|-------------|-------------|----|-----|
| GO:0006414               | 3.66E-48 |  | 83.88823529 | 0.871911978 | 35 | 105 |
| translational elongation |          |  |             |             |    |     |

STable4\_20PerPair

|                           |          |           |             |    |    |
|---------------------------|----------|-----------|-------------|----|----|
| GO:0006415                | 8.20E-47 | 93.343044 | 0.755657048 | 33 | 91 |
| translational termination |          |           |             |    |    |

|                                                             |          |             |             |    |     |
|-------------------------------------------------------------|----------|-------------|-------------|----|-----|
| GO:0006614                                                  | 2.99E-46 | 79.40386505 | 0.871911978 | 34 | 105 |
| SRP-dependent cotranslational protein targeting to membrane |          |             |             |    |     |

|                                               |          |             |             |    |     |
|-----------------------------------------------|----------|-------------|-------------|----|-----|
| GO:0006613                                    | 4.38E-46 | 78.29554264 | 0.880215902 | 34 | 106 |
| cotranslational protein targeting to membrane |          |             |             |    |     |

|                         |          |             |             |    |     |
|-------------------------|----------|-------------|-------------|----|-----|
| GO:0045047              | 4.38E-46 | 78.29554264 | 0.880215902 | 34 | 106 |
| protein targeting to ER |          |             |             |    |     |



STable4\_20PerPair

|                                                                |          |             |             |    |     |
|----------------------------------------------------------------|----------|-------------|-------------|----|-----|
| GO:0072599                                                     | 4.38E-46 | 78.29554264 | 0.880215902 | 34 | 106 |
| establishment of protein localization to endoplasmic reticulum |          |             |             |    |     |

|                                               |          |             |             |    |     |
|-----------------------------------------------|----------|-------------|-------------|----|-----|
| GO:0070972                                    | 3.08E-44 | 67.05398671 | 0.979862985 | 34 | 118 |
| protein localization to endoplasmic reticulum |          |             |             |    |     |

|                                                                       |          |             |             |    |     |
|-----------------------------------------------------------------------|----------|-------------|-------------|----|-----|
| GO:0000184                                                            | 2.78E-42 | 62.82878909 | 0.988166909 | 33 | 119 |
| "nuclear-transcribed mRNA catabolic process, nonsense-mediated decay" |          |             |             |    |     |

|                               |          | STable4_20PerPair |             |    |     |
|-------------------------------|----------|-------------------|-------------|----|-----|
| GO:0019080                    | 7.90E-42 | 50.45892495       | 1.253892464 | 35 | 151 |
| viral genome expression       |          |                   |             |    |     |
| GO:0019083                    | 7.90E-42 | 50.45892495       | 1.253892464 | 35 | 151 |
| viral transcription           |          |                   |             |    |     |
| GO:0006413                    | 1.02E-41 | 50.02413273       | 1.262196388 | 35 | 152 |
| translational initiation      |          |                   |             |    |     |
| GO:0006612                    | 6.40E-40 | 47.21594684       | 1.270500311 | 34 | 153 |
| protein targeting to membrane |          |                   |             |    |     |

STable4\_20PerPair

|                                            |          |             |             |    |     |
|--------------------------------------------|----------|-------------|-------------|----|-----|
| GO:0000956                                 | 2.57E-38 | 41.57312661 | 1.403363089 | 34 | 169 |
| nuclear-transcribed mRNA catabolic process |          |             |             |    |     |

|                                      |          |             |             |    |     |
|--------------------------------------|----------|-------------|-------------|----|-----|
| GO:0043624                           | 2.96E-38 | 44.91982759 | 1.270500311 | 33 | 153 |
| cellular protein complex disassembly |          |             |             |    |     |

|                                             |          |             |             |    |     |
|---------------------------------------------|----------|-------------|-------------|----|-----|
| GO:0034623                                  | 7.50E-38 | 40.07425249 | 1.444882707 | 34 | 174 |
| cellular macromolecular complex disassembly |          |             |             |    |     |

|                             |          |             |             |    |     |
|-----------------------------|----------|-------------|-------------|----|-----|
| GO:0043241                  | 9.44E-38 | 43.10786207 | 1.312019929 | 33 | 158 |
| protein complex disassembly |          |             |             |    |     |

STable4\_20PerPair

|                                                                  |          |             |             |    |     |      |
|------------------------------------------------------------------|----------|-------------|-------------|----|-----|------|
| GO:0006402<br>catabolic process                                  | 1.72E-37 | 38.9500969  | 1.478098401 | 34 | 178 | mRNA |
| GO:0032984<br>macromolecular complex disassembly                 | 2.12E-37 | 38.678749   | 1.486402325 | 34 | 179 |      |
| GO:0072594<br>establishment of protein localization to organelle | 2.41E-35 | 32.93255814 | 1.694000415 | 34 | 204 |      |
| GO:0006401<br>catabolic process                                  | 2.87E-35 | 32.7376581  | 1.702304339 | 34 | 205 | RNA  |

STable4\_20PerPair

|                                                  |          |             |             |    |     |
|--------------------------------------------------|----------|-------------|-------------|----|-----|
| GO:0019058                                       | 6.89E-35 | 29.69537815 | 1.918206353 | 35 | 231 |
| viral infectious cycle                           |          |             |             |    |     |
| GO:0022415                                       | 1.88E-34 | 26.99043367 | 2.159020137 | 36 | 260 |
| viral reproductive process                       |          |             |             |    |     |
| GO:0071845                                       | 1.18E-31 | 23.28703047 | 2.358314304 | 35 | 284 |
| cellular component disassembly at cellular level |          |             |             |    |     |
| GO:0022411                                       | 1.95E-31 | 22.91234597 | 2.391529998 | 35 | 288 |
| cellular component disassembly                   |          |             |             |    |     |

STable4\_20PerPair

|                    |          |             |             |    |     |
|--------------------|----------|-------------|-------------|----|-----|
| GO:0016032         | 3.36E-28 | 15.61696096 | 3.745069545 | 38 | 451 |
| viral reproduction |          |             |             |    |     |

|                                   |          |             |             |    |     |
|-----------------------------------|----------|-------------|-------------|----|-----|
| GO:0033365                        | 1.96E-27 | 14.80370059 | 3.927755865 | 38 | 473 |
| protein localization to organelle |          |             |             |    |     |

|                   |          |             |             |    |     |
|-------------------|----------|-------------|-------------|----|-----|
| GO:0006605        | 3.09E-26 | 14.17325136 | 3.936059788 | 37 | 474 |
| protein targeting |          |             |             |    |     |

|                                    |          |             |             |   |    |
|------------------------------------|----------|-------------|-------------|---|----|
| GO:0042274                         | 2.85E-07 | 47.88628763 | 0.149470625 | 5 | 18 |
| ribosomal small subunit biogenesis |          |             |             |   |    |

STable4\_20PerPair

|                                                 |          |             |             |    |     |      |
|-------------------------------------------------|----------|-------------|-------------|----|-----|------|
| GO:0022613                                      | 3.63E-07 | 7.364632238 | 1.868382811 | 12 | 225 |      |
| ribonucleoprotein complex biogenesis            |          |             |             |    |     |      |
| GO:0071843                                      | 6.93E-07 | 6.903573177 | 1.984637741 | 12 | 239 |      |
| cellular component biogenesis at cellular level |          |             |             |    |     |      |
| GO:0006364                                      | 2.37E-06 | 10.59151786 | 0.863608055 | 8  | 104 | rRNA |
| processing                                      |          |             |             |    |     |      |
| GO:0016072                                      | 3.61E-06 | 9.964285714 | 0.913431596 | 8  | 110 | rRNA |
| metabolic process                               |          |             |             |    |     |      |

STable4\_20PerPair

GO:0042254 4.09E-06 8.218725869 1.237284617 9 149  
 ribosome biogenesis

GO:0030490 1.91E-05 91.83974359 0.058127465 3 7  
 maturation of SSU-rRNA

Tissue: whole\_Blood=>Adipose\_Subcutaneous Type: cluster  
 SourceGene: RP11-156P1.1(ENSG00000263142.1)  
 TargetGeneSet: MTND1P23 RPL22 CLSTN1 DFFA HSPG2 RPL11 ARID1A  
 WASF2 PHACTR4 TAF12 PUM1 KPNA7 THRAP3 MFI2 RPS8 RP4 CCBL2 RPL5  
 RP11 ATP5F1 RPRD2 ZNF687 SPRR1B RPS27 ASH1L MIR555 SSR2 TKT GAS5  
 ELK4 RPS7 PPP1CB UBC COMMD1 GMCL1 DGUOK COA5 EIF5B RANBP2  
 UGGT1 SENP2 EEF1B2 TRIP12 GIGYF2 SNED1 BRK1 RPL15 DALRD3 LAMB2  
 RAD54L2 RPL29 KCTD6 RPL24 PHC3 DNAJC19 EIF4G1 RPL35A ZFYVE28 AFAP1  
 BOD1L RPL34 NDUFC1 ANAPC10 RPS3A RPL6P12 NDUFS4 CTD NDUFAF2 MRPS36 BTF3  
 TBCA COX7C APC HINT1 SKP1 CTB MTND5P11 RPS14 SLC2A3P1  
 GNB2L1 RPL15P3 GFOD1 NOL7 PRRC2A AGPAT1 RPS18 TAPBP SYNGAP1 RPS10  
 RPL10A MRPL32 MTRNR2L9 COX7A2 WDR11 MRPS12 PHACTR2 IGF2R PSMB1  
 FOXK1 ADCY1 CHCHD2 RPS3AP26 TRRAP MRPS33 MLL3 KIAA1967 DRP2  
 KAT6A HOOK3 RPS20 PAG1 KIAA1429 RPL30 EIF3H EEF1D RPL8 NFIB  
 RPS6 TLN1 CLTA NIPSNAP3A TMEM245 RC3H2 RPL35 RPL12 LRRC8A SETX  
 GTF3C4 RPL7A SEC16A COMMD3 KIAA0913 RPS24 MRPL43 FAM53B RPL27A  
 MTRNR2L8 CKAP5 C11orf31 PPP6R3 CCDC90B C11orf73 UBE4A  
 ATP5L DDX6 RPS25 H2AFJ MLL4 PFDN5 CBX5 LRP1 EEA1 RPL18AP3  
 SBN01 GOLGA3 TPT1 ESD MED4-AS1 DNAJC3 CCNB1IP1 CHD8  
 YLPM1 GOLGA8IP HERC2 USP8 RPS3AP6 RPS27L PIAS1 CALML4 SIN3A  
 C15orf40 SEC11A MRPL46 CIB1 MPG HBQ1 NME3 SPSB3 NDUFB10 ECI1  
 RPS15A SRCAP ZNF629 FBXL8 NFATC3 ATXN1L ZNF778 RPL13 VPS53 WDR81  
 POLR2A RPL26 KIAA0100 RPL23A TAF15 RPL17 RPL19 MED1 CDK12  
 WIPF2 RPL27 CLTC MED13 NT5C TNRC6C NPLOC4 ANAPC11 ROCK1P1 ANKRD12 DSG4  
 ZNF407 ATP5D RPS15 NFIC PTPRS RPL36 TRAPPC5 ZNF121 PIN1 C19orf43



Stable4\_20PerPair

| BRD4            | SLC35E1  | UBA52                                                               | GATAD2A          | RPSAP58           | POU2F2 | ZNF428 | IGFL2  | ARHGAP35         |       |
|-----------------|----------|---------------------------------------------------------------------|------------------|-------------------|--------|--------|--------|------------------|-------|
| RPL18           | RPL13A   | ZNF264                                                              | RPS5             | KIF3B             | SCAND1 | NCOA3  | TSHZ2  | RPL12P4          | SON   |
| C22orf29        |          | MIR1306                                                             | DGCR6L           | HMGB1P10          |        | TTC28  | UQCR10 | RP3              | MPST  |
| EIF3L           | RPL3     | TNRC6B                                                              | EP300            | ZC3H7B            | ZBED4  | TMSB4X | DYNLT3 | UXT              | HUWE1 |
| UBQLN2          | NHSL2    | RPS4X                                                               | COX7B            | RPL39             | MCTS1  | XIAP   | HCFC1  | RPL10            | MT    |
| GOBPID          | Pvalue   | OddsRatio                                                           | ExpCount         | Count             | Size   | Term   |        |                  |       |
| GO:0006414      |          | 5.89933309633214e-57                                                | 64.6297948260482 |                   |        |        |        | 1.57670749429105 |       |
| 46              | 105      | translational elongation                                            |                  |                   |        |        |        |                  |       |
| GO:0006614      |          | 5.89933309633214e-57                                                | 64.6297948260482 |                   |        |        |        | 1.57670749429105 |       |
| 46              | 105      | SRP-dependent cotranslational protein targeting to membrane         |                  |                   |        |        |        |                  |       |
| GO:0006415      |          | 6.53477919546686e-57                                                | 76.7713688353216 |                   |        |        |        | 1.36647982838558 |       |
| 44              | 91       | translational termination                                           |                  |                   |        |        |        |                  |       |
| GO:0006613      |          | 1.03006189095429e-56                                                | 63.5481481481482 |                   |        |        |        | 1.59172375614144 |       |
| 46              | 106      | cotranslational protein targeting to membrane                       |                  |                   |        |        |        |                  |       |
| GO:0045047      |          | 1.03006189095429e-56                                                | 63.5481481481482 |                   |        |        |        | 1.59172375614144 |       |
| 46              | 106      | protein targeting to ER                                             |                  |                   |        |        |        |                  |       |
| GO:0072599      |          | 1.03006189095429e-56                                                | 63.5481481481482 |                   |        |        |        | 1.59172375614144 |       |
| 46              | 106      | establishment of protein localization to endoplasmic reticulum      |                  |                   |        |        |        |                  |       |
| GO:0070972      |          | 4.96891286863683e-54                                                | 52.9119558154646 |                   |        |        |        | 1.77191889834614 |       |
| 46              | 118      | protein localization to endoplasmic reticulum                       |                  |                   |        |        |        |                  |       |
| GO:0000184      |          | 4.10039540896099e-52                                                | 50.0628535512256 |                   |        |        |        | 1.78693516019653 |       |
| 45              | 119      | nuclear-transcribed mRNA catabolic process, nonsense-mediated decay |                  |                   |        |        |        |                  |       |
| GO:0006413      |          | 3.57260818519646e-51                                                | 38.5889849795175 |                   |        |        |        | 2.28247180125943 |       |
| 48              | 152      | translational initiation                                            |                  |                   |        |        |        |                  |       |
| GO:0019080      |          | 3.5160917247145e-48                                                 | 36.1979392926761 |                   |        |        |        | 2.26745553940904 |       |
| 46              | 151      | viral genome expression                                             |                  |                   |        |        |        |                  |       |
| GO:0019083      |          | 3.5160917247145e-48                                                 | 36.1979392926761 |                   |        |        |        | 2.26745553940904 |       |
| 46              | 151      | viral transcription                                                 |                  |                   |        |        |        |                  |       |
| GO:0006612      |          | 7.04185746667432e-48                                                | 35.5163141498606 |                   |        |        |        | 2.29748806310982 |       |
| 46              | 153      | protein targeting to membrane                                       |                  |                   |        |        |        |                  |       |
| GO:0043624      |          | 2.46605133196567e-46                                                | 34.2199612403101 |                   |        |        |        | 2.29748806310982 |       |
| 45              | 153      | cellular protein complex disassembly                                |                  |                   |        |        |        |                  |       |
| GO:0000956      |          | 1.25329217738777e-45                                                | 30.8613131745353 |                   |        |        |        | 2.53774825271607 |       |
| 46              | 169      | nuclear-transcribed mRNA catabolic process                          |                  |                   |        |        |        |                  |       |
| GO:0043241      |          | 1.27470216854243e-45                                                | 32.6942272072443 |                   |        |        |        | 2.37256937236177 |       |
| 45              | 158      | protein complex disassembly                                         |                  |                   |        |        |        |                  |       |
| GO:0034623      |          | 5.60180436364997e-45                                                | 29.6452850877193 |                   |        |        |        | 2.61282956196803 |       |
| 46              | 174      | cellular macromolecular complex disassembly                         |                  |                   |        |        |        |                  |       |
| GO:0006402      |          | 1.78824078307116e-44                                                | 28.7387914230019 |                   |        |        |        | 2.67289460936959 |       |
| 46              | 178      | mRNA catabolic process                                              |                  |                   |        |        |        |                  |       |
| GO:0032984      |          | 2.37853567125793e-44                                                | 28.5206876841226 |                   |        |        |        | 2.68791087121998 |       |
| 46              | 179      | macromolecular complex disassembly                                  |                  |                   |        |        |        |                  |       |
| GO:0072594      |          | 6.88679885481271e-43                                                | 24.7890221056576 |                   |        |        |        | 3.06331741747976 |       |
| 47              | 204      | establishment of protein localization to organelle                  |                  |                   |        |        |        |                  |       |
| GO:0006401      |          | 2.15182360495151e-41                                                | 23.812939056236  | 3.07833367933015  |        |        |        | 46               |       |
| 205             | RNA      | catabolic process                                                   |                  |                   |        |        |        |                  |       |
| GO:0019058      |          | 7.45876356362686e-39                                                | 20.4284495021337 |                   |        |        |        | 3.46875648744032 |       |
| 46              | 231      | viral infectious cycle                                              |                  |                   |        |        |        |                  |       |
| GO:0022415      |          | 1.1977323386528e-37                                                 | 18.1990334161834 |                   |        |        |        | 3.90422808110165 |       |
| 47              | 260      | viral reproductive process                                          |                  |                   |        |        |        |                  |       |
| GO:0071845      |          | 5.09744630689954e-37                                                | 16.8464547186842 |                   |        |        |        | 4.26461836551104 |       |
| 48              | 284      | cellular component disassembly at cellular level                    |                  |                   |        |        |        |                  |       |
| GO:0022411      |          | 1.01277834122005e-36                                                | 16.5609467455621 |                   |        |        |        | 4.3246834129126  | 48    |
| 288             | cellular | component disassembly                                               |                  |                   |        |        |        |                  |       |
| GO:0033365      |          | 1.24346992248694e-32                                                | 10.9230273657701 |                   |        |        |        | 7.10269185523493 |       |
| 54              | 473      | protein localization to organelle                                   |                  |                   |        |        |        |                  |       |
| GO:0016032      |          | 1.33541202097787e-31                                                | 10.9276220855168 |                   |        |        |        | 6.77233409452633 |       |
| 52              | 451      | viral reproduction                                                  |                  |                   |        |        |        |                  |       |
| GO:0006605      |          | 1.50289697290595e-31                                                | 10.6032240310527 |                   |        |        |        | 7.11770811708532 |       |
| 53              | 474      | protein targeting                                                   |                  |                   |        |        |        |                  |       |
| GO:0042274      |          | 4.32260026440763e-09                                                | 43.1             | 0.270292713307038 |        |        | 7      | 18               |       |
| ribosomal small |          | subunit biogenesis                                                  |                  |                   |        |        |        |                  |       |
| GO:0042254      |          | 3.81992070276261e-07                                                | 6.60589677047289 |                   |        |        |        | 2.23742301570826 |       |

STable4\_20PerPair

|                                           |        |                                                 |                  |                  |           |                                                                     |          |                  |              |      |
|-------------------------------------------|--------|-------------------------------------------------|------------------|------------------|-----------|---------------------------------------------------------------------|----------|------------------|--------------|------|
| 13                                        | 149    | ribosome biogenesis                             |                  |                  |           |                                                                     |          |                  |              |      |
| GO:0022613                                |        | 1.55064279758008e-06                            | 4.95898161244696 |                  |           |                                                                     |          | 3.37865891633797 |              |      |
| 15                                        | 225    | ribonucleoprotein complex biogenesis            |                  |                  |           |                                                                     |          |                  |              |      |
| GO:0071843                                |        | 3.27945978912267e-06                            | 4.64440417256011 |                  |           |                                                                     |          | 3.58888658224344 |              |      |
| 15                                        | 239    | cellular component biogenesis at cellular level |                  |                  |           |                                                                     |          |                  |              |      |
| GO:0006364                                |        | 3.61499274462288e-06                            | 7.26693390893206 |                  |           |                                                                     |          | 1.56169123244066 |              |      |
| 10                                        | 104    | rRNA processing                                 |                  |                  |           |                                                                     |          |                  |              |      |
| GO:0016072                                |        | 6.00643764925281e-06                            | 6.8280193236715  | 1.65178880354301 |           |                                                                     |          |                  | 10           |      |
| 110                                       |        | rRNA metabolic process                          |                  |                  |           |                                                                     |          |                  |              |      |
| GO:0022904                                |        | 1.37605177398398e-05                            | 7.03597480106101 |                  |           |                                                                     |          | 1.44156113763753 |              |      |
| 9                                         | 96     | respiratory electron transport chain            |                  |                  |           |                                                                     |          |                  |              |      |
| GO:0006417                                |        | 1.76133241900498e-05                            | 4.90104529616725 |                  |           |                                                                     |          | 2.70292713307038 |              |      |
| 12                                        | 180    | regulation of translation                       |                  |                  |           |                                                                     |          |                  |              |      |
| Tissue: whole_Blood=>Adipose_subcutaneous |        |                                                 |                  | Type: asymmetric |           |                                                                     |          |                  |              |      |
| SourceGene:                               |        | RP11-160E2.11(ENSG00000262292.1)                |                  |                  |           |                                                                     |          |                  |              |      |
| TargetGeneSet:                            |        | MTND1P23                                        | DNAJC11          | DFFA             | MFN2      | C1orf144                                                            |          | HSPG2            |              |      |
| RPL11                                     | ARID1A | PHACTR4                                         | PRDX3P2          | KPNA7            | TXLNA     | ZBTB80S                                                             | MACF1    | RPS8             | RPS15AP10    |      |
| RP4                                       | RPL5   | RP11                                            | RPRD2            | RPS27            | ASH1L     | SSR2                                                                | ARHGEF11 |                  | TMEM63A NBAS |      |
| PPP1CB                                    | DHX57  | UBC                                             | GMCL1            | DGUOK            | DCTN1     | SUCLG1                                                              | TMEM131  | COA5             | EIF5B        |      |
| RANBP2                                    | UGGT1  | USP37                                           | TRIP12           | GIGYF2           | HDLBP     | BRK1                                                                | RPL15    | RAD54L2          | RPL29        |      |
| FAM208A                                   | PCNP   | RPL24                                           | DNAJC19          | PSMD2            | EIF4G1    | HTT                                                                 | AFAP1    | BOD1L            | RPL34        |      |
| NDUFC1                                    | RPS3A  | NIPBL                                           | CTD              | MRPS36           | ERAP1     | HINT1                                                               | SKP1     | UBE2B            | CTB          |      |
| MTND5P11                                  |        | KDM3B                                           | PAIP2            | RPS14            | SLC2A3P1  |                                                                     | RPL15P3  | PRRC2A           | AGPAT1       |      |
| SYNGAP1                                   | RPL10A | USP49                                           | MTRNR2L9         |                  | WDR11     | KIAA1919                                                            |          | RWDD1            | MRPS12       |      |
| TATDN2P2                                  |        | IGF2R                                           | ANKRD61          | MPLKIP           | CHCHD2    | RPS3AP26                                                            |          | TRRAP            | HIPK2        | MLL3 |
| DRP2                                      | HMBOX1 | KIF13B                                          | KAT6A            | HOOK3            | PRKDC     | RPS20                                                               | ARFGEF1  | RPL30            | EIF3H        |      |
| MED30                                     | EEF1D  | RPL8                                            | RPS6             | CLTA             | NIPSNAP3A |                                                                     | NUP188   | SETX             | RPL7A        |      |
| NACC2                                     | SEC16A | BMS1                                            | RPS24            | SFR1             | EIF6      | NSMCE4A                                                             | FAM53B   | PHRF1            | RPL27A       |      |
| MTRNR2L8                                  |        | CKAP5                                           | INCENP           | ZBTB3            | UBE4A     | DDX6                                                                | USP5     | H2AFJ            | SCAF11       | MLL4 |
| PFDN5                                     | CBX5   | USP44                                           | SART3            | RP3              | SBNO1     | EP400                                                               | GOLGA3   | TPT1             | ESD          | MED4 |
| MYCBP2-AS1                                |        | DNAJC3                                          | CHD8             | C14orf21         |           | FNTB                                                                | YLPM1    | KIAA1737         |              |      |
| GOLGA8IP                                  |        | HERC2                                           | HERC2P10         |                  | MGA       | CCNDBP1                                                             | DUT      | RPS27L           | MYO9A        |      |
| C15orf40                                  |        | SEC11A                                          | LRRK1            | C16orf13         |           | FAM173A                                                             | NME3     | SPSB3            | TCEB2        |      |
| RPS15A                                    | GTF3C1 | SRCAP                                           | CNOT1            | ZNF778           | RPL13     | VPS53                                                               | WDR81    | METTTL16         | ZZEF1        |      |
| POLR2A                                    | RPL26  | TOM1L2                                          | KIAA0100         |                  | SUPT6H    | RPL23A                                                              | TAOK1    | RPL17            | RPL19        |      |
| CDK12                                     | RPL27  | DHX8                                            | KPNB1            | CLTC             | DCAF7     | NT5C                                                                | TNRC6C   | TBC1D16          | NPLOC4       |      |
| ANAPC11                                   | RPS15  | FAM108A1                                        |                  | AP3D1            | NFIC      | PTPRS                                                               | RPL36    | TUBB4A           | TRAPPC5      |      |
| RAB11B                                    | ZNF121 | PIN1                                            | TNPO2            | C19orf43         |           | NACC1                                                               | BRD4     | SLC35E1          | UPF1         |      |
| GATAD2A                                   | SUPT5H | POU2F2                                          | MEGF8            | ZNF428           | ARHGAP35  |                                                                     | RPL18    | RPS5             | RRBP1        |      |
| KIF3B                                     | SCAND1 | SOGA1                                           | TOP1             | NCOA3            | PRPF6     | BTG3                                                                | SCAF4    | URB1             | MCM3AP       |      |
| PI4KA                                     | ZNF70  | TTC28                                           | NF2              | PRR14L           | DEPDC5    | MPST                                                                | RPL3     | EP300            | DYNLT3       |      |
| HUWE1                                     | RPS4X  | TTC3P1                                          | RPL39            | XIAP             | HCFC1     | RPL10                                                               | MT       |                  |              |      |
| GOBPID                                    | Pvalue | OddsRatio                                       | ExpCount         | Count            | Size      | Term                                                                |          |                  |              |      |
| GO:0006415                                |        | 7.93120786946066e-42                            | 52.4815088757396 |                  |           | translational termination                                           |          | 1.28461698152377 |              |      |
| 35                                        | 91     |                                                 |                  |                  |           |                                                                     |          |                  |              |      |
| GO:0006614                                |        | 7.42072388663324e-41                            | 44.0310559006211 |                  |           | SRP-dependent cotranslational protein targeting to membrane         |          | 1.48225036329666 |              |      |
| 36                                        | 105    |                                                 |                  |                  |           |                                                                     |          |                  |              |      |
| GO:0006613                                |        | 1.1109152407343e-40                             | 43.3989795918367 |                  |           | cotranslational protein targeting to membrane                       |          | 1.49636703342329 |              |      |
| 36                                        | 106    |                                                 |                  |                  |           |                                                                     |          |                  |              |      |
| GO:0045047                                |        | 1.1109152407343e-40                             | 43.3989795918367 |                  |           | protein targeting to ER                                             |          | 1.49636703342329 |              |      |
| 36                                        | 106    |                                                 |                  |                  |           |                                                                     |          |                  |              |      |
| GO:0072599                                |        | 1.1109152407343e-40                             | 43.3989795918367 |                  |           | establishment of protein localization to endoplasmic reticulum      |          | 1.49636703342329 |              |      |
| 36                                        | 106    |                                                 |                  |                  |           |                                                                     |          |                  |              |      |
| GO:0006414                                |        | 3.20522472751164e-39                            | 41.9437869822485 |                  |           | translational elongation                                            |          | 1.48225036329666 |              |      |
| 35                                        | 105    |                                                 |                  |                  |           |                                                                     |          |                  |              |      |
| GO:0070972                                |        | 9.97086882210217e-39                            | 37.0165505226481 |                  |           | protein localization to endoplasmic reticulum                       |          | 1.66576707494291 |              |      |
| 36                                        | 118    |                                                 |                  |                  |           |                                                                     |          |                  |              |      |
| GO:0000184                                |        | 1.41326910528304e-38                            | 36.5679862306368 |                  |           | nuclear-transcribed mRNA catabolic process, nonsense-mediated decay |          | 1.67988374506955 |              |      |
| 36                                        | 119    |                                                 |                  |                  |           |                                                                     |          |                  |              |      |
| GO:0019080                                |        | 2.66846485142243e-37                            | 28.6326900522444 |                  |           | viral genome expression                                             |          | 2.13161718912186 |              |      |
| 38                                        | 151    |                                                 |                  |                  |           |                                                                     |          |                  |              |      |
| GO:0019083                                |        | 2.66846485142243e-37                            | 28.6326900522444 |                  |           | viral transcription                                                 |          | 2.13161718912186 |              |      |
| 38                                        | 151    |                                                 |                  |                  |           |                                                                     |          |                  |              |      |

Stable4\_20PerPair

|            |                      |                                                    |                   |
|------------|----------------------|----------------------------------------------------|-------------------|
| GO:0006413 | 3.51775361986536e-37 | 28.3795180722892                                   | 2.14573385924849  |
| 38         | 152                  | translational initiation                           |                   |
| GO:0000956 | 2.83416296036044e-35 | 24.6669732364573                                   | 2.38571725140129  |
| 38         | 169                  | nuclear-transcribed mRNA catabolic process         |                   |
| GO:0006402 | 2.35136427778691e-34 | 23.0665232358003                                   | 2.512767282541    |
| 178        |                      | mRNA catabolic process                             | 38                |
| GO:0006612 | 3.42251206224134e-34 | 25.8791208791209                                   | 2.15985052937513  |
| 36         | 153                  | protein targeting to membrane                      |                   |
| GO:0043624 | 8.74469948793941e-33 | 24.7976632233477                                   | 2.15985052937513  |
| 35         | 153                  | cellular protein complex disassembly               |                   |
| GO:0043241 | 2.94057867862393e-32 | 23.7812094097272                                   | 2.2304338800083   |
| 158        |                      | protein complex disassembly                        | 35                |
| GO:0034623 | 4.941537903453e-32   | 21.9083850931677                                   | 2.45630060203446  |
| 36         | 174                  | cellular macromolecular complex disassembly        |                   |
| GO:0072594 | 5.56051456808098e-32 | 19.4178400348381                                   | 2.87980070583351  |
| 38         | 204                  | establishment of protein localization to organelle |                   |
| GO:0006401 | 6.74841506781684e-32 | 19.3001947911406                                   | 2.89391737596014  |
| 38         | 205                  | RNA catabolic process                              |                   |
| GO:0032984 | 1.4544615601827e-31  | 21.1348651348651                                   | 2.52688395266764  |
| 36         | 179                  | macromolecular complex disassembly                 |                   |
| GO:0022415 | 1.85677402419733e-31 | 16.1119421800151                                   | 3.67033423292506  |
| 41         | 260                  | viral reproductive process                         |                   |
| GO:0019058 | 4.23274920995736e-31 | 17.3025568181818                                   | 3.26095079925265  |
| 39         | 231                  | viral infectious cycle                             |                   |
| GO:0033365 | 6.87570972132975e-27 | 9.712433838701                                     | 6.67718496989828  |
| 473        |                      | protein localization to organelle                  | 47                |
| GO:0016032 | 8.45429329251521e-27 | 9.95049226441632                                   | 6.36661822711231  |
| 46         | 451                  | viral reproduction                                 |                   |
| GO:0071845 | 1.90694595434763e-26 | 13.0286511901264                                   | 4.00913431596429  |
| 38         | 284                  | cellular component disassembly at cellular level   |                   |
| GO:0022411 | 3.2183712458171e-26  | 12.8165301204819                                   | 4.06560099647083  |
| 38         | 288                  | cellular component disassembly                     |                   |
| GO:0006605 | 7.27531125689954e-26 | 9.40012421625458                                   | 6.69130164002491  |
| 46         | 474                  | protein targeting                                  |                   |
| GO:0016568 | 5.05915899457672e-07 | 3.9930389653184                                    | 5.91488478306     |
|            |                      | chromatin modification                             | 21 419            |
| GO:0022613 | 7.10503497627726e-07 | 5.30498866213152                                   | 3.17625077849284  |
| 15         | 225                  | ribonucleoprotein complex biogenesis               |                   |
| GO:0071843 | 1.52047873261881e-06 | 4.96846655328798                                   | 3.37388416026573  |
| 15         | 239                  | cellular component biogenesis at cellular level    |                   |
| GO:0042274 | 3.93836789527174e-06 | 27.5106300734441                                   | 0.254100062279427 |
| 5          | 18                   | ribosomal small subunit biogenesis                 |                   |
| GO:0042254 | 8.55041496082584e-06 | 5.82710069835549                                   | 2.10338384886859  |
| 11         | 149                  | ribosome biogenesis                                |                   |

Tissue: Whole\_Blood=>Adipose\_Subcutaneous Type: cluster

SourceGene: RP11-160E2.11(ENSG00000262292.1)

|                |          |         |          |          |           |          |          |          |           |      |
|----------------|----------|---------|----------|----------|-----------|----------|----------|----------|-----------|------|
| TargetGeneSet: | MTND1P23 | DNAJC11 | DFFA     | MFN2     | C1orf144  | HSPG2    |          |          |           |      |
| RPL11          | ARID1A   | PHACTR4 | PRDX3P2  | KPNA7    | TXLNA     | ZBTB80S  | MACF1    | RPS8     | RPS15AP10 |      |
| RP4            | RPL5     | RP11    | RPRD2    | RPS27    | ASH1L     | SSR2     | ARHGEF11 |          | TMEM63A   | NBAS |
| PPP1CB         | DHX57    | UBC     | GMCL1    | DGUOK    | DCTN1     | SUCLG1   | TMEM131  | COA5     | EIF5B     |      |
| RANBP2         | UGGT1    | USP37   | TRIP12   | GIGYF2   | HDLBP     | BRK1     | RPL15    | RAD54L2  | RPL29     |      |
| FAM208A        | PCNP     | RPL24   | DNAJC19  | PSMD2    | EIF4G1    | HTT      | AFAP1    | BOD1L    | RPL34     |      |
| NDUFC1         | RPS3A    | NIPBL   | CTD      | MRPS36   | ERAP1     | HINT1    | SKP1     | UBE2B    | CTB       |      |
| MTND5P11       |          | KDM3B   | PAIP2    | RPS14    | SLC2A3P1  |          | RPL15P3  | PRRC2A   | AGPAT1    |      |
| SYNGAP1        | RPL10A   | USP49   | MTRNR2L9 |          | WDR11     | KIAA1919 |          | RWDD1    | MRPS12    |      |
| TATDN2P2       |          | IGF2R   | ANKRD61  | MPLKIP   | CHCHD2    | RPS3AP26 |          | TRRAP    |           | MLL3 |
| DRP2           | HMBOX1   | KIF13B  | KAT6A    | HOOK3    | PRKDC     | RPS20    | ARFGEF1  | RPL30    | EIF3H     |      |
| MED30          | EEF1D    | RPL8    | RPS6     | CLTA     | NIPSNAP3A |          | NUP188   | SETX     | RPL7A     |      |
| NACC2          | SEC16A   | BMS1    | RPS24    | SFR1     | EIF6      | NSMCE4A  | FAM53B   | PHRF1    | RPL27A    |      |
| MTRNR2L8       |          | CKAP5   | INCENP   | ZBTB3    | UBE4A     | DDX6     | USP5     | H2AFJ    | SCAF11    | MLL4 |
| PFDN5          | CBX5     | USP44   | SART3    | RP3      | SBNO1     | EP400    | GOLGA3   | TPT1     | ESD       | MED4 |
| MYCBP2-AS1     |          | DNAJC3  | CHD8     | C14orf21 |           | FNTB     | YLPM1    | KIAA1737 |           |      |
| GOLGA8IP       |          | HERC2   | HERC2P10 |          | MGA       | CCNDBP1  | DUT      | RPS27L   | MYO9A     |      |

Stable4\_20PerPair

| C15orf40   | SEC11A               | LRRK1                                                               | C16orf13         | FAM173A  | NME3     | SPSB3            | TCEB2   |
|------------|----------------------|---------------------------------------------------------------------|------------------|----------|----------|------------------|---------|
| RPS15A     | GTF3C1               | SRCAP                                                               | CNOT1            | ZNF778   | RPL13    | VPS53            | WDR81   |
| POLR2A     | RPL26                | TOM1L2                                                              | KIAA0100         | SUPT6H   | RPL23A   | TAOK1            | RPL17   |
| CDK12      | RPL27                | DHX8                                                                | KPNB1            | CLTC     | DCAF7    | NT5C             | TNRC6C  |
| ANAPC11    | RPS15                | FAM108A1                                                            | AP3D1            | NFIC     | PTPRS    | RPL36            | TUBB4A  |
| RAB11B     | ZNF121               | PIN1                                                                | TNPO2            | C19orf43 | NACC1    | BRD4             | SLC35E1 |
| GATAD2A    | SUPT5H               | POU2F2                                                              | MEGF8            | ZNF428   | ARHGAP35 | RPL18            | RPS5    |
| KIF3B      | SCAND1               | SOGA1                                                               | TOP1             | NCOA3    | PRPF6    | BTG3             | SCAF4   |
| PI4KA      | ZNF70                | TTC28                                                               | NF2              | PRR14L   | DEPDC5   | MPST             | RPL3    |
| HUWE1      | RPS4X                | TTC3P1                                                              | RPL39            | XIAP     | HCFC1    | RPL10            | MT      |
| GOBPID     | Pvalue               | OddsRatio                                                           | ExpCount         | Count    | Size     | Term             |         |
| GO:0006415 | 7.93120786946066e-42 | 52.4815088757396                                                    |                  |          |          | 1.28461698152377 |         |
| 35         | 91                   | translational termination                                           |                  |          |          |                  |         |
| GO:0006614 | 7.42072388663324e-41 | 44.0310559006211                                                    |                  |          |          | 1.48225036329666 |         |
| 36         | 105                  | SRP-dependent cotranslational protein targeting to membrane         |                  |          |          |                  |         |
| GO:0006613 | 1.1109152407343e-40  | 43.3989795918367                                                    |                  |          |          | 1.49636703342329 |         |
| 36         | 106                  | cotranslational protein targeting to membrane                       |                  |          |          |                  |         |
| GO:0045047 | 1.1109152407343e-40  | 43.3989795918367                                                    |                  |          |          | 1.49636703342329 |         |
| 36         | 106                  | protein targeting to ER                                             |                  |          |          |                  |         |
| GO:0072599 | 1.1109152407343e-40  | 43.3989795918367                                                    |                  |          |          | 1.49636703342329 |         |
| 36         | 106                  | establishment of protein localization to endoplasmic reticulum      |                  |          |          |                  |         |
| GO:0006414 | 3.20522472751164e-39 | 41.9437869822485                                                    |                  |          |          | 1.48225036329666 |         |
| 35         | 105                  | translational elongation                                            |                  |          |          |                  |         |
| GO:0070972 | 9.97086882210217e-39 | 37.0165505226481                                                    |                  |          |          | 1.66576707494291 |         |
| 36         | 118                  | protein localization to endoplasmic reticulum                       |                  |          |          |                  |         |
| GO:0000184 | 1.41326910528304e-38 | 36.5679862306368                                                    |                  |          |          | 1.67988374506955 |         |
| 36         | 119                  | nuclear-transcribed mRNA catabolic process, nonsense-mediated decay |                  |          |          |                  |         |
| GO:0019080 | 2.66846485142243e-37 | 28.6326900522444                                                    |                  |          |          | 2.13161718912186 |         |
| 38         | 151                  | viral genome expression                                             |                  |          |          |                  |         |
| GO:0019083 | 2.66846485142243e-37 | 28.6326900522444                                                    |                  |          |          | 2.13161718912186 |         |
| 38         | 151                  | viral transcription                                                 |                  |          |          |                  |         |
| GO:0006413 | 3.51775361986536e-37 | 28.3795180722892                                                    |                  |          |          | 2.14573385924849 |         |
| 38         | 152                  | translational initiation                                            |                  |          |          |                  |         |
| GO:0000956 | 2.83416296036044e-35 | 24.6669732364573                                                    |                  |          |          | 2.38571725140129 |         |
| 38         | 169                  | nuclear-transcribed mRNA catabolic process                          |                  |          |          |                  |         |
| GO:0006402 | 2.35136427778691e-34 | 23.0665232358003                                                    |                  |          |          | 2.512767282541   | 38      |
| 178        |                      | mRNA catabolic process                                              |                  |          |          |                  |         |
| GO:0006612 | 3.42251206224134e-34 | 25.8791208791209                                                    |                  |          |          | 2.15985052937513 |         |
| 36         | 153                  | protein targeting to membrane                                       |                  |          |          |                  |         |
| GO:0043624 | 8.74469948793941e-33 | 24.7976632233477                                                    |                  |          |          | 2.15985052937513 |         |
| 35         | 153                  | cellular protein complex disassembly                                |                  |          |          |                  |         |
| GO:0043241 | 2.94057867862393e-32 | 23.7812094097272                                                    |                  |          |          | 2.2304338800083  | 35      |
| 158        |                      | protein complex disassembly                                         |                  |          |          |                  |         |
| GO:0034623 | 4.941537903453e-32   | 21.9083850931677                                                    |                  |          |          | 2.45630060203446 |         |
| 36         | 174                  | cellular macromolecular complex disassembly                         |                  |          |          |                  |         |
| GO:0072594 | 5.56051456808098e-32 | 19.4178400348381                                                    |                  |          |          | 2.87980070583351 |         |
| 38         | 204                  | establishment of protein localization to organelle                  |                  |          |          |                  |         |
| GO:0006401 | 6.74841506781684e-32 | 19.3001947911406                                                    |                  |          |          | 2.89391737596014 |         |
| 38         | 205                  | RNA catabolic process                                               |                  |          |          |                  |         |
| GO:0032984 | 1.4544615601827e-31  | 21.1348651348651                                                    |                  |          |          | 2.52688395266764 |         |
| 36         | 179                  | macromolecular complex disassembly                                  |                  |          |          |                  |         |
| GO:0022415 | 1.85677402419733e-31 | 16.1119421800151                                                    |                  |          |          | 3.67033423292506 |         |
| 41         | 260                  | viral reproductive process                                          |                  |          |          |                  |         |
| GO:0019058 | 4.23274920995736e-31 | 17.3025568181818                                                    |                  |          |          | 3.26095079925265 |         |
| 39         | 231                  | viral infectious cycle                                              |                  |          |          |                  |         |
| GO:0033365 | 6.87570972132975e-27 | 9.712433838701                                                      | 6.67718496989828 |          |          |                  | 47      |
| 473        |                      | protein localization to organelle                                   |                  |          |          |                  |         |
| GO:0016032 | 8.45429329251521e-27 | 9.95049226441632                                                    |                  |          |          | 6.36661822711231 |         |
| 46         | 451                  | viral reproduction                                                  |                  |          |          |                  |         |
| GO:0071845 | 1.90694595434763e-26 | 13.0286511901264                                                    |                  |          |          | 4.00913431596429 |         |
| 38         | 284                  | cellular component disassembly at cellular level                    |                  |          |          |                  |         |
| GO:0022411 | 3.2183712458171e-26  | 12.8165301204819                                                    |                  |          |          | 4.06560099647083 |         |
| 38         | 288                  | cellular component disassembly                                      |                  |          |          |                  |         |

Stable4\_20PerPair

|                                                            |                      |                                                                     |                                  |
|------------------------------------------------------------|----------------------|---------------------------------------------------------------------|----------------------------------|
| GO:0006605                                                 | 7.27531125689954e-26 | 9.40012421625458                                                    | 6.69130164002491                 |
| 46                                                         | 474                  | protein targeting                                                   |                                  |
| GO:0016568                                                 | 5.05915899457672e-07 | 3.9930389653184                                                     | 5.91488478306 21 419             |
| chromatin modification                                     |                      |                                                                     |                                  |
| GO:0022613                                                 | 7.10503497627726e-07 | 5.30498866213152                                                    | 3.17625077849284                 |
| 15                                                         | 225                  | ribonucleoprotein complex biogenesis                                |                                  |
| GO:0071843                                                 | 1.52047873261881e-06 | 4.96846655328798                                                    | 3.37388416026573                 |
| 15                                                         | 239                  | cellular component biogenesis at cellular level                     |                                  |
| GO:0042274                                                 | 3.93836789527174e-06 | 27.5106300734441                                                    | 0.254100062279427                |
| 5                                                          | 18                   | ribosomal small subunit biogenesis                                  |                                  |
| GO:0042254                                                 | 8.55041496082584e-06 | 5.82710069835549                                                    | 2.10338384886859                 |
| 11                                                         | 149                  | ribosome biogenesis                                                 |                                  |
| Tissue: whole_Blood=>Adipose_Subcutaneous Type: asymmetric |                      |                                                                     |                                  |
| SourceGene: RPL11-676J12.7(ENSG00000262003.1)              |                      |                                                                     |                                  |
| TargetGeneSet:                                             |                      |                                                                     |                                  |
| RPL31                                                      | EEF1B2               | RPL32 RPL15 CCDC12 RPL24 RPL34                                      | BTF3 CTD UBE2D2                  |
| RPS14                                                      | RPS18                | SLC26A4 RPL30 EIF3H RPS6                                            | ANP32B RPL35 RPL7A RPS24         |
| KRT17                                                      | NAP1L1               | TPT1 HMG1P24                                                        | MED6 RPS3AP6 SEC11A CHMP1A RPL26 |
| RPS7P1                                                     | RPL17                | RPL27 FASN FAM32A RPS11                                             | CCDC106 RPL3 PGAM1P7 RPS4X       |
| GOBPID                                                     | Pvalue               | OddsRatio ExpCount                                                  | Count Size Term                  |
| GO:0006414                                                 | 7.28762727938273e-39 | 253.238554216867                                                    | 0.268839526676355                |
| 22                                                         | 105                  | translational elongation                                            |                                  |
| GO:0006614                                                 | 7.28762727938273e-39 | 253.238554216867                                                    | 0.268839526676355                |
| 22                                                         | 105                  | SRP-dependent cotranslational protein targeting to membrane         |                                  |
| GO:0006613                                                 | 9.18709778112143e-39 | 250.206349206349                                                    | 0.271399903120891                |
| 22                                                         | 106                  | cotranslational protein targeting to membrane                       |                                  |
| GO:0045047                                                 | 9.18709778112143e-39 | 250.206349206349                                                    | 0.271399903120891                |
| 22                                                         | 106                  | protein targeting to ER                                             |                                  |
| GO:0072599                                                 | 9.18709778112143e-39 | 250.206349206349                                                    | 0.271399903120891                |
| 22                                                         | 106                  | establishment of protein localization to endoplasmic reticulum      |                                  |
| GO:0006415                                                 | 6.00536191284438e-38 | 268.95 0.232994256452841                                            | 21 91                            |
| translational termination                                  |                      |                                                                     |                                  |
| GO:0070972                                                 | 1.23979948816468e-37 | 218.747222222222                                                    | 0.302124420455332                |
| 22                                                         | 118                  | protein localization to endoplasmic reticulum                       |                                  |
| GO:0000184                                                 | 3.05396912720757e-35 | 191.732142857143                                                    | 0.304684796899869                |
| 21                                                         | 119                  | nuclear-transcribed mRNA catabolic process, nonsense-mediated decay |                                  |
| GO:0006413                                                 | 5.14374647620722e-35 | 161.152820512821                                                    | 0.38917721956958                 |
| 22                                                         | 152                  | translational initiation                                            |                                  |
| GO:0006612                                                 | 6.00155745904302e-35 | 159.911450381679                                                    | 0.391737596014117                |
| 22                                                         | 153                  | protein targeting to membrane                                       |                                  |
| GO:0019080                                                 | 6.65844791257209e-33 | 144.213461538462                                                    | 0.386616843125043                |
| 21                                                         | 151                  | viral genome expression                                             |                                  |
| GO:0019083                                                 | 6.65844791257209e-33 | 144.213461538462                                                    | 0.386616843125043                |
| 21                                                         | 151                  | viral transcription                                                 |                                  |
| GO:0043624                                                 | 8.93583699021507e-33 | 142.008522727273                                                    | 0.391737596014117                |
| 21                                                         | 153                  | cellular protein complex disassembly                                |                                  |
| GO:0043241                                                 | 1.83147031627765e-32 | 136.777828467153                                                    | 0.4045394782368 21               |
| 158                                                        |                      | protein complex disassembly                                         |                                  |
| GO:0072594                                                 | 4.82396830690036e-32 | 114.69010989011 0.522316794685489                                   | 22                               |
| 204                                                        |                      | establishment of protein localization to organelle                  |                                  |
| GO:0000956                                                 | 8.17637173766711e-32 | 126.514358108108                                                    | 0.432703619126704                |
| 21                                                         | 169                  | nuclear-transcribed mRNA catabolic process                          |                                  |
| GO:0034623                                                 | 1.55961763645306e-31 | 122.337009803922                                                    | 0.445505501349388                |
| 21                                                         | 174                  | cellular macromolecular complex disassembly                         |                                  |
| GO:0006402                                                 | 2.57767079133985e-31 | 119.186703821656                                                    | 0.455747007127534                |
| 21                                                         | 178                  | mRNA catabolic process                                              |                                  |
| GO:0032984                                                 | 2.91715038613628e-31 | 118.424050632911                                                    | 0.458307383572071                |
| 21                                                         | 179                  | macromolecular complex disassembly                                  |                                  |
| GO:0006401                                                 | 5.74692238821335e-30 | 101.504755434783                                                    | 0.524877171130026                |
| 21                                                         | 205                  | RNA catabolic process                                               |                                  |
| GO:0019058                                                 | 7.75910438986615e-29 | 88.775 0.59144695868798                                             | 21 231                           |
| viral infectious cycle                                     |                      |                                                                     |                                  |
| GO:0022415                                                 | 1.00353320410872e-27 | 77.8438807531381                                                    | 0.665697875579545                |

STable4\_20PerPair

|                                           |     |                                                  |                  |                    |
|-------------------------------------------|-----|--------------------------------------------------|------------------|--------------------|
| 21                                        | 260 | viral reproductive process                       |                  |                    |
| GO:0071845                                |     | 6.71095433016046e-27                             | 70.6204847908745 | 0.727146910248426  |
| 21                                        | 284 | cellular component disassembly at cellular level |                  |                    |
| GO:0022411                                |     | 9.06057056968201e-27                             | 69.5428370786517 | 0.737388416026573  |
| 21                                        | 288 | cellular component disassembly                   |                  |                    |
| GO:0033365                                |     | 7.84288111884257e-24                             | 45.4081300813008 | 1.21105805826586   |
| 22                                        | 473 | protein localization to organelle                |                  |                    |
| GO:0006605                                |     | 8.2161911069685e-24                              | 45.3044247787611 | 1.2136184347104    |
| 474                                       |     | protein targeting                                |                  | 22                 |
| GO:0016032                                |     | 1.23042816851143e-22                             | 42.6837209302326 | 1.15472977648606   |
| 21                                        | 451 | viral reproduction                               |                  |                    |
| GO:0022613                                |     | 7.98120775456516e-08                             | 18.0479898299698 | 0.57608470002076   |
| 8                                         | 225 | ribonucleoprotein complex biogenesis             |                  |                    |
| GO:0042254                                |     | 8.54563461789605e-08                             | 23.4516431924883 | 0.38149609023597   |
| 7                                         | 149 | ribosome biogenesis                              |                  |                    |
| GO:0042274                                |     | 1.08453084725298e-07                             | 124.675324675325 | 0.0460867760016608 |
| 4                                         | 18  | ribosomal small subunit biogenesis               |                  |                    |
| GO:0071843                                |     | 1.27078117795642e-07                             | 16.9374533512465 | 0.611929970244274  |
| 8                                         | 239 | cellular component biogenesis at cellular level  |                  |                    |
| GO:0006364                                |     | 6.3609947487871e-06                              | 22.5931186868687 | 0.266279150231818  |
| 5                                         | 104 | rRNA processing                                  |                  |                    |
| GO:0016072                                |     | 8.37237154329821e-06                             | 21.2931547619048 | 0.281641408899038  |
| 5                                         | 110 | rRNA metabolic process                           |                  |                    |
| Tissue: whole_Blood=>Adipose_Subcutaneous |     | Type: asymmetric                                 |                  |                    |

SourceGene: SKA2(ENSG00000182628.7) spindle and kinetochore associated complex subunit 2

|                |         |            |          |          |         |         |        |         |         |      |
|----------------|---------|------------|----------|----------|---------|---------|--------|---------|---------|------|
| TargetGeneSet: | VPS13D  | UBR4       | KIAA0090 | HSPG2    | RPL11   | PRDX3P2 | KPNA7  | SZT2    |         |      |
| RPS8           | RPL5    | RP11       | ASH1L    | MIR555   | GON4L   | LPGAT1  | SOS1   | COX7A2L | USP34   | TET3 |
| VAMP5          | RANBP2  | UGGT1      | TRIP12   | GPC1     | RPL32   | RPL15   | RPL29  | PCNP    | SNORA7B |      |
| DNAJC19        | HTT     | BOD1L      | COPS4    | RPL34    | NDUFC1  | MTRR    | NIPBL  | BDP1    | SKP1    |      |
| RPS14          | RPL15P3 | LINC00243  | CUL9     | XPO5     | MLL3    | NOM1    | KAT6A  | PRKDC   |         |      |
| TTC35          | EIF3H   | CTA        | RANBP6   | RPS6     | CLTA    | TNC     | NUP188 | SETX    | RPL7A   |      |
| QSOX2          | PHYH    | KIAA0913   | PDZD8    | EIF6     | LRRC56  | RPL27A  | PIGCP1 | KDM2A   | GAL     |      |
| CCDC90B        | ATM     | UBE4A      | MLL4     | PFDN5    | XPOT    | RP1     | MLXIP  | SBNO1   | TPT1    |      |
| ZC3H13         | COMMD6  | COL4A2-AS1 | TEP1     | CHD8     | NIN     | HERC2   | MGA    | RPS27L  |         |      |
| CALML4         | CIB1    | NDUFB10    | CIITA    | RPS15A   | SMG1    | SRCAP   | CNOT1  | AARS    | ZNF23   |      |
| CHST4          | RPL13   | ZZEF1      | RPL26    | C17orf48 | SLC47A1 | SUPT6H  | RPL23A | RPL17   |         |      |
| RPL19          | AOC2    | CTD        | ZNF236   | RPS15    | BRD4    | ZNF587  | LBP    | RALGAPB | SYNJ1   | SON  |

| GOBPID     | Pvalue   | OddsRatio | ExpCount    | Count       | Size | Term |
|------------|----------|-----------|-------------|-------------|------|------|
| GO:0006415 | 5.08E-26 |           | 48.65454545 | 0.686388485 | 21   | 91   |
| GO:0000184 | 6.21E-25 |           | 37.13591658 | 0.897584942 | 22   | 119  |
| GO:0006414 | 1.35E-24 |           | 40.50568182 | 0.791986714 | 21   | 105  |
| GO:0006614 | 1.35E-24 |           | 40.50568182 | 0.791986714 | 21   | 105  |

UBE2G2 MCM3AP MPST EP300 STable4\_20PerPair  
 RPL10 ZBED4 ZNF81 KDM5C HUWE1 RPS4X RPL39 RP4

GO:0006415 5.08E-26 48.65454545 0.686388485 21 91  
 translational termination

GO:0000184 6.21E-25 37.13591658 0.897584942 22 119  
 "nuclear-transcribed mRNA catabolic process, nonsense-mediated decay"

GO:0006414 1.35E-24 40.50568182 0.791986714 21 105  
 translational elongation

GO:0006614 1.35E-24 40.50568182 0.791986714 21 105  
 SRP-dependent cotranslational protein targeting to membrane

STable4\_20PerPair

GO:0006613 1.68E-24 40.0263369 0.799529444 21 106  
 cotranslational protein targeting to membrane

GO:0045047 1.68E-24 40.0263369 0.799529444 21 106  
 protein targeting to ER

GO:0072599 1.68E-24 40.0263369 0.799529444 21 106  
 establishment of protein localization to endoplasmic reticulum

GO:0000956 2.84E-24 27.64527383 1.274721473 24 169  
 nuclear-transcribed mRNA catabolic process



STable4\_20PerPair

|                                                             |          |             |             |    |     |      |
|-------------------------------------------------------------|----------|-------------|-------------|----|-----|------|
| GO:0006402<br>catabolic process                             | 1.03E-23 | 26.0131398  | 1.342606048 | 24 | 178 | mRNA |
| GO:0070972<br>protein localization to endoplasmic reticulum | 1.87E-23 | 35.04510309 | 0.890042212 | 21 | 118 |      |
| GO:0019080<br>viral genome expression                       | 1.54E-22 | 27.86117794 | 1.138952322 | 22 | 151 |      |
| GO:0019083<br>viral transcription                           | 1.54E-22 | 27.86117794 | 1.138952322 | 22 | 151 |      |
| GO:0006413<br>translational initiation                      | 1.79E-22 | 27.644916   | 1.146495052 | 22 | 152 |      |

STable4\_20PerPair

GO:0043624 2.08E-22 27.43195578 1.154037783 22 153  
 cellular protein complex disassembly

GO:0006401 3.26E-22 22.09060773 1.546259774 24 205 RNA  
 catabolic process

GO:0043241 4.32E-22 26.41413117 1.191751436 22 158  
 protein complex disassembly

GO:0034623 3.81E-21 23.60707804 1.312435126 22 174  
 cellular macromolecular complex disassembly

STable4\_20PerPair

|                                                    |          |             |             |    |     |
|----------------------------------------------------|----------|-------------|-------------|----|-----|
| GO:0006612                                         | 5.61E-21 | 25.68956612 | 1.154037783 | 21 | 153 |
| protein targeting to membrane                      |          |             |             |    |     |
| GO:0032984                                         | 7.19E-21 | 22.84720697 | 1.350148779 | 22 | 179 |
| macromolecular complex disassembly                 |          |             |             |    |     |
| GO:0072594                                         | 1.31E-19 | 19.67411898 | 1.538717044 | 22 | 204 |
| establishment of protein localization to organelle |          |             |             |    |     |
| GO:0019058                                         | 1.98E-18 | 17.09981851 | 1.74237077  | 22 | 231 |
| viral infectious cycle                             |          |             |             |    |     |
| GO:0006605                                         | 8.86E-18 | 10.77030394 | 3.575254308 | 28 | 474 |
| protein targeting                                  |          |             |             |    |     |

STable4\_20PerPair

|                            |          |             |             |    |     |
|----------------------------|----------|-------------|-------------|----|-----|
| GO:0022415                 | 2.54E-17 | 14.98541486 | 1.961109958 | 22 | 260 |
| viral reproductive process |          |             |             |    |     |

|                                   |          |             |             |    |     |
|-----------------------------------|----------|-------------|-------------|----|-----|
| GO:0033365                        | 8.96E-17 | 10.25899595 | 3.567711577 | 27 | 473 |
| protein localization to organelle |          |             |             |    |     |

|                                                  |          |             |             |    |     |
|--------------------------------------------------|----------|-------------|-------------|----|-----|
| GO:0071845                                       | 1.67E-16 | 13.58954111 | 2.142135492 | 22 | 284 |
| cellular component disassembly at cellular level |          |             |             |    |     |

|                                |          |            |             |    |     |
|--------------------------------|----------|------------|-------------|----|-----|
| GO:0022411                     | 2.24E-16 | 13.3813845 | 2.172306415 | 22 | 288 |
| cellular component disassembly |          |            |             |    |     |

STable4\_20PerPair

|                                                    |          |             |             |    |     |
|----------------------------------------------------|----------|-------------|-------------|----|-----|
| GO:0016032<br>viral reproduction                   | 2.94E-15 | 9.722222222 | 3.401771504 | 25 | 451 |
| GO:0042254<br>ribosome biogenesis                  | 1.83E-06 | 9.129857143 | 1.12386686  | 9  | 149 |
| GO:0016570<br>histone modification                 | 4.35E-06 | 6.327020408 | 1.968652688 | 11 | 261 |
| GO:0016569<br>covalent chromatin modification      | 5.40E-06 | 6.176100128 | 2.013909072 | 11 | 267 |
| GO:0022613<br>ribonucleoprotein complex biogenesis | 7.61E-06 | 6.637068358 | 1.697114387 | 10 | 225 |

STable4\_20PerPair

|                                                 |          |            |             |    |     |      |
|-------------------------------------------------|----------|------------|-------------|----|-----|------|
| GO:0042274                                      | 8.64E-06 | 38.9877551 | 0.135769151 | 4  | 18  |      |
| ribosomal small subunit biogenesis              |          |            |             |    |     |      |
| GO:0071843                                      | 1.29E-05 | 6.22513343 | 1.802712615 | 10 | 239 |      |
| cellular component biogenesis at cellular level |          |            |             |    |     |      |
| GO:0006364                                      | 1.33E-05 | 10.0783303 | 0.784443983 | 7  | 104 | rRNA |
| processing                                      |          |            |             |    |     |      |
| GO:0016568                                      | 1.59E-05 | 4.64819376 | 3.160404124 | 13 | 419 |      |
| chromatin modification                          |          |            |             |    |     |      |

STable4\_20PerPair

GO:0016072 1.92E-05 9.487245384 0.829700367 7 110 rRNA  
 metabolic process

| Tissue:                                                          | whole_Blood=>Adipose_Subcutaneous | Type:                          | cluster           |    |                                                                     |
|------------------------------------------------------------------|-----------------------------------|--------------------------------|-------------------|----|---------------------------------------------------------------------|
| SourceGene:                                                      | SKA2(ENSG00000182628.7)           |                                |                   |    |                                                                     |
| TargetGeneSet:                                                   | VPS13D UBR4 KIAA0090              | HSPG2 RPL11 PRDX3P2 KPNA7 SZT2 |                   |    |                                                                     |
| RPS8 RPL5 RP11 ASH1L MIR555 GON4L LPGAT1 SOS1 COX7A2L USP34 TET3 |                                   |                                |                   |    |                                                                     |
| VAMP5 RANBP2 UGGT1 TRIP12 GPC1 RPL32 RPL15 RPL29 PCNP SNORA7B    |                                   |                                |                   |    |                                                                     |
| DNAJC19 HTT BOD1L COPS4 RPL34 NDUFC1 MTRR NIPBL BDP1 SKP1        |                                   |                                |                   |    |                                                                     |
| RPS14 RPL15P3 LINC00243 CUL9 XPO5 MLL3 NOM1 KAT6A PRKDC          |                                   |                                |                   |    |                                                                     |
| TTC35 EIF3H CTA RANBP6 RPS6 CLTA TNC NUP188 SETX RPL7A           |                                   |                                |                   |    |                                                                     |
| QSOX2 PHYH KIAA0913 PDZD8 EIF6 LRR56 RPL27A PIGCP1 KDM2A GAL     |                                   |                                |                   |    |                                                                     |
| CCDC90B ATM UBE4A MLL4 PFDN5 XPOT RP1 MLXIP SBNO1 TPT1           |                                   |                                |                   |    |                                                                     |
| ZC3H13 COMMD6 COL4A2-AS1 TEP1 CHD8 NIN HERC2 MGA RPS27L          |                                   |                                |                   |    |                                                                     |
| CALML4 CIB1 NDUFB10 CIITA RPS15A SMG1 SRCAP CNOT1 AARS ZNF23     |                                   |                                |                   |    |                                                                     |
| CHST4 RPL13 ZZEF1 RPL26 C17orf48 SLC47A1 SUPT6H RPL23A RPL17     |                                   |                                |                   |    |                                                                     |
| RPL19 AOC2 CTD ZNF236 RPS15 BRD4 ZNF587 LBP RALGAPB SYNJ1 SON    |                                   |                                |                   |    |                                                                     |
| UBE2G2 MCM3AP MPST EP300 ZBED4 ZNF81 KDM5C HUWE1 RPS4X RPL39 RP4 |                                   |                                |                   |    |                                                                     |
| RPL10                                                            |                                   |                                |                   |    |                                                                     |
| GOBPID Pvalue OddsRatio ExpCount Count Size Term                 |                                   |                                |                   |    |                                                                     |
| GO:0006415 21 91                                                 | 5.08265285222481e-26              | 48.6545454545455               | 0.686388485225936 |    | translational termination                                           |
| GO:0000184 22 119                                                | 6.20707647381988e-25              | 37.1359165777936               | 0.897584942218532 |    | nuclear-transcribed mRNA catabolic process, nonsense-mediated decay |
| GO:0006414 21 105                                                | 1.35355223956287e-24              | 40.5056818181818               | 0.791986713722234 |    | translational elongation                                            |
| GO:0006614 21 105                                                | 1.35355223956287e-24              | 40.5056818181818               | 0.791986713722234 |    | SRP-dependent cotranslational protein targeting to membrane         |
| GO:0006613 21 106                                                | 1.67808866830512e-24              | 40.0263368983957               | 0.799529444329112 |    | cotranslational protein targeting to membrane                       |
| GO:0045047 21 106                                                | 1.67808866830512e-24              | 40.0263368983957               | 0.799529444329112 |    | protein targeting to ER                                             |
| GO:0072599 21 106                                                | 1.67808866830512e-24              | 40.0263368983957               | 0.799529444329112 |    | establishment of protein localization to endoplasmic reticulum      |
| GO:0000956 24 169                                                | 2.84276513215265e-24              | 27.6452738336714               | 1.27472147256245  |    | nuclear-transcribed mRNA catabolic process                          |
| GO:0006402 24 178                                                | 1.02718916831435e-23              | 26.0131398013751               | 1.34260604802436  |    | mRNA catabolic process                                              |
| GO:0070972 21 118                                                | 1.8718659352694e-23               | 35.0451030927835               | 0.890042211611653 |    | protein localization to endoplasmic reticulum                       |
| GO:0019080 22 151                                                | 1.54188313293787e-22              | 27.8611779381627               | 1.13895232163864  |    | viral genome expression                                             |
| GO:0019083 22 151                                                | 1.54188313293787e-22              | 27.8611779381627               | 1.13895232163864  |    | viral transcription                                                 |
| GO:0006413 22 152                                                | 1.79234540152662e-22              | 27.6449160035367               | 1.14649505224552  |    | translational initiation                                            |
| GO:0043624 153 205                                               | 2.08118992313669e-22              | 27.4319557778363               | 1.1540377828524   | 22 | cellular protein complex disassembly                                |
| GO:0006401 24 205                                                | 3.26019612331964e-22              | 22.0906077348066               | 1.54625977441008  |    | RNA catabolic process                                               |

STable4\_20PerPair

|                                           |                      |                                                    |                     |
|-------------------------------------------|----------------------|----------------------------------------------------|---------------------|
| GO:0043241                                | 4.32304443474305e-22 | 26.4141311697093                                   | 1.19175143588679    |
| 22                                        | 158                  | protein complex disassembly                        |                     |
| GO:0034623                                | 3.80972730832128e-21 | 23.6070780399274                                   | 1.31243512559684    |
| 22                                        | 174                  | cellular macromolecular complex disassembly        |                     |
| GO:0006612                                | 5.61471104620423e-21 | 25.6895661157025                                   | 1.1540377828524 21  |
| 153                                       |                      | protein targeting to membrane                      |                     |
| GO:0032984                                | 7.18547446031269e-21 | 22.8472069697635                                   | 1.35014877863124    |
| 22                                        | 179                  | macromolecular complex disassembly                 |                     |
| GO:0072594                                | 1.30764677196797e-19 | 19.6741189844638                                   | 1.5387170438032 22  |
| 204                                       |                      | establishment of protein localization to organelle |                     |
| GO:0019058                                | 1.982088327887e-18   | 17.0998185117967                                   | 1.74237077018891    |
| 22                                        | 231                  | viral infectious cycle                             |                     |
| GO:0006605                                | 8.86029571348654e-18 | 10.7703039362232                                   | 3.57525430766037    |
| 28                                        | 474                  | protein targeting                                  |                     |
| GO:0022415                                | 2.5398257890994e-17  | 14.9854148555974                                   | 1.96110995778839    |
| 22                                        | 260                  | viral reproductive process                         |                     |
| GO:0033365                                | 8.96421478629371e-17 | 10.2589959531882                                   | 3.56771157705349    |
| 27                                        | 473                  | protein localization to organelle                  |                     |
| GO:0071845                                | 1.66613343238302e-16 | 13.5895411073089                                   | 2.14213549235347    |
| 22                                        | 284                  | cellular component disassembly at cellular level   |                     |
| GO:0022411                                | 2.24033549592335e-16 | 13.3813844957221                                   | 2.17230641478098    |
| 22                                        | 288                  | cellular component disassembly                     |                     |
| GO:0016032                                | 2.94083958466102e-15 | 9.72222222222222                                   | 3.40177150370217    |
| 25                                        | 451                  | viral reproduction                                 |                     |
| GO:0042254                                | 1.83429122788905e-06 | 9.12985714285714                                   | 1.12386686042488    |
| 9                                         | 149                  | ribosome biogenesis                                |                     |
| GO:0016570                                | 4.34628421000627e-06 | 6.32702040816327                                   | 1.96865268839527    |
| 11                                        | 261                  | histone modification                               |                     |
| GO:0016569                                | 5.40119841554895e-06 | 6.17610012755102                                   | 2.01390907203654    |
| 11                                        | 267                  | covalent chromatin modification                    |                     |
| GO:0022613                                | 7.6149980667054e-06  | 6.63706835799859                                   | 1.69711438654764    |
| 10                                        | 225                  | ribonucleoprotein complex biogenesis               |                     |
| GO:0042274                                | 8.6384978716643e-06  | 38.9877551020408                                   | 0.135769150923812   |
| 4                                         | 18                   | ribosomal small subunit biogenesis                 |                     |
| GO:0071843                                | 1.2912402130024e-05  | 6.2251334303736                                    | 1.80271261504394 10 |
| 239                                       |                      | cellular component biogenesis at cellular level    |                     |
| GO:0006364                                | 1.33223485277612e-05 | 10.0783303011926                                   | 0.784443983115355   |
| 7                                         | 104                  | rRNA processing                                    |                     |
| GO:0016568                                | 1.58957143921517e-05 | 4.64819376026273                                   | 3.16040412428206    |
| 13                                        | 419                  | chromatin modification                             |                     |
| GO:0016072                                | 1.92310225544999e-05 | 9.48724538359033                                   | 0.829700366756626   |
| 7                                         | 110                  | rRNA metabolic process                             |                     |
| Tissue: whole_Blood=>Adipose_Subcutaneous |                      | Type: asymmetric                                   |                     |

SourceGene: SPRR2E(ENSG00000203785.4) small proline-rich protein 2E



STable4\_20PerPair

|                |          |         |         |         |        |         |         |          |             |
|----------------|----------|---------|---------|---------|--------|---------|---------|----------|-------------|
| TargetGeneSet: | RPL22    | RP11    | RPL11   | RP4     | RPS8   | RPL5    | LCE2C   | S100A13  |             |
| CICP13         | B3GALNT2 | PREPL   | UBC     | LONRF2  | RPL31  | R3HDM1  | EEF1B2  | SP100    |             |
| CHL1-AS2       |          | RPL32   | UBE2E1  | GORASP1 | RHOA   | RNF123  | FAM208A | RPL24    | EIF4G1 LPP  |
| RPL35A         | UBE2D3   | RPL34   | FRG1    | CTD     | BTF3   | DTWD2   | HINT1   | UBE2B    | PAIP2       |
| RPS14          | SLU7     | GRM4    | RPL39P3 | ASCC3   | TNRC18 | DAGLB   | RP9     | CUX1     | GTF2E2      |
| RPS20          | RPL30    | PLEC    | RPS6    | FOXD4L5 | CALML5 | RPS24   | KLLN    | GBF1     | NSMCE4A FAU |
| CCND1          | RPS25    | ING4    | USP5    | CLEC2B  | KRT5   | PFDN5   | RPL41   | RPS7P10  | TPT1        |
| COMMD6         | NGDN     | KLHDC2  | CGRRF1  | SNW1    | HERC2  | CCNDBP1 | RPS3AP6 | RPS17L   | SEC11A TSC2 |
| GTF3C1         | YPEL3    | IST1    | TERF2IP | MYBBP1A | RPL26  | RPL23A  | ZNHIT3  | RPL17    | RPL19       |
| KRT10          | RPL27    | RPS26P8 | PNPO    | RPTOR   | DSG1   | WDR7    | PIP5K1C | C19orf43 |             |
| CASP14         | DMWD     | CCDC106 | CHMP4B  | TH1L    | PPIL2  | TTC28   | RPL3    | PHF16    | RPS4X       |
| RPL39          | RP1      | FLNA    |         |         |        |         |         |          |             |

| GOBPID | Pvalue | OddsRatio | ExpCount | Count | Size | Term |
|--------|--------|-----------|----------|-------|------|------|
|--------|--------|-----------|----------|-------|------|------|

|                           |          |  |             |             |    |    |
|---------------------------|----------|--|-------------|-------------|----|----|
| GO:0006415                | 7.73E-39 |  | 91.36789773 | 0.585634212 | 27 | 91 |
| translational termination |          |  |             |             |    |    |

|                          |          |  |             |             |    |     |
|--------------------------|----------|--|-------------|-------------|----|-----|
| GO:0006414               | 8.37E-39 |  | 79.89370629 | 0.675731783 | 28 | 105 |
| translational elongation |          |  |             |             |    |     |

|                                                             |          |  |             |             |    |     |
|-------------------------------------------------------------|----------|--|-------------|-------------|----|-----|
| GO:0006614                                                  | 8.37E-39 |  | 79.89370629 | 0.675731783 | 28 | 105 |
| SRP-dependent cotranslational protein targeting to membrane |          |  |             |             |    |     |

STable4\_20PerPair

GO:0006613 1.13E-38 78.86390533 0.682167324 28 106  
cotranslational protein targeting to membrane

GO:0045047 1.13E-38 78.86390533 0.682167324 28 106  
protein targeting to ER

GO:0072599 1.13E-38 78.86390533 0.682167324 28 106  
establishment of protein localization to endoplasmic reticulum

GO:0070972 3.35E-37 68.29128205 0.759393814 28 118  
protein localization to endoplasmic reticulum

GO:0000184 4.36E-37 67.53609467 0.765829354 28 119  
"nuclear-transcribed mRNA catabolic process, nonsense-mediated decay"

STable4\_20PerPair

|                                            |          |             |             |    |     |
|--------------------------------------------|----------|-------------|-------------|----|-----|
| GO:0019080                                 | 1.26E-35 | 52.8744877  | 0.97176666  | 29 | 151 |
| viral genome expression                    |          |             |             |    |     |
| GO:0019083                                 | 1.26E-35 | 52.8744877  | 0.97176666  | 29 | 151 |
| viral transcription                        |          |             |             |    |     |
| GO:0006413                                 | 1.55E-35 | 52.44092988 | 0.978202201 | 29 | 152 |
| translational initiation                   |          |             |             |    |     |
| GO:0006612                                 | 9.70E-34 | 49.04910769 | 0.984637741 | 28 | 153 |
| protein targeting to membrane              |          |             |             |    |     |
| GO:0000956                                 | 1.91E-32 | 43.43436989 | 1.087606394 | 28 | 169 |
| nuclear-transcribed mRNA catabolic process |          |             |             |    |     |

STable4\_20PerPair

|                                             |          |             |             |    |     |      |
|---------------------------------------------|----------|-------------|-------------|----|-----|------|
| GO:0043624                                  | 4.66E-32 | 46.20779221 | 0.984637741 | 27 | 153 |      |
| cellular protein complex disassembly        |          |             |             |    |     |      |
| GO:0006402                                  | 8.90E-32 | 40.80246154 | 1.145526261 | 28 | 178 | mRNA |
| catabolic process                           |          |             |             |    |     |      |
| GO:0043241                                  | 1.18E-31 | 44.42852186 | 1.016815445 | 27 | 158 |      |
| protein complex disassembly                 |          |             |             |    |     |      |
| GO:0034623                                  | 1.86E-30 | 39.54823748 | 1.119784098 | 27 | 174 |      |
| cellular macromolecular complex disassembly |          |             |             |    |     |      |
| GO:0032984                                  | 4.17E-30 | 38.23385167 | 1.151961802 | 27 | 179 |      |
| macromolecular complex disassembly          |          |             |             |    |     |      |
| GO:0072594                                  | 4.88E-30 | 34.71118881 | 1.312850322 | 28 | 204 |      |

STable4\_20PerPair  
 establishment of protein localization to organelle

|                   |          |             |             |    |     |     |
|-------------------|----------|-------------|-------------|----|-----|-----|
| GO:0006401        | 5.62E-30 | 34.51264668 | 1.319285863 | 28 | 205 | RNA |
| catabolic process |          |             |             |    |     |     |

|                        |          |             |             |    |     |  |
|------------------------|----------|-------------|-------------|----|-----|--|
| GO:0019058             | 5.71E-30 | 31.75464109 | 1.486609923 | 29 | 231 |  |
| viral infectious cycle |          |             |             |    |     |  |

|                            |          |             |             |    |     |  |
|----------------------------|----------|-------------|-------------|----|-----|--|
| GO:0022415                 | 1.92E-28 | 27.71124188 | 1.673240606 | 29 | 260 |  |
| viral reproductive process |          |             |             |    |     |  |

|                                                  |          |             |             |    |     |  |
|--------------------------------------------------|----------|-------------|-------------|----|-----|--|
| GO:0071845                                       | 2.58E-27 | 25.06047794 | 1.827693585 | 29 | 284 |  |
| cellular component disassembly at cellular level |          |             |             |    |     |  |

|                                |          |             |             |    |     |  |
|--------------------------------|----------|-------------|-------------|----|-----|--|
| GO:0022411                     | 3.89E-27 | 24.66644546 | 1.853435748 | 29 | 288 |  |
| cellular component disassembly |          |             |             |    |     |  |

STable4\_20PerPair

|                                    |          |             |             |    |     |      |
|------------------------------------|----------|-------------|-------------|----|-----|------|
| GO:0033365                         | 1.47E-24 | 16.55492361 | 3.044010795 | 32 | 473 |      |
| protein localization to organelle  |          |             |             |    |     |      |
| GO:0006605                         | 2.55E-23 | 15.70541761 | 3.050446336 | 31 | 474 |      |
| protein targeting                  |          |             |             |    |     |      |
| GO:0016032                         | 9.34E-23 | 15.76405384 | 2.902428898 | 30 | 451 |      |
| viral reproduction                 |          |             |             |    |     |      |
| GO:0042274                         | 1.05E-09 | 82.44827586 | 0.115839734 | 6  | 18  |      |
| ribosomal small subunit biogenesis |          |             |             |    |     |      |
| GO:0006364                         | 1.18E-09 | 18.28249167 | 0.669296242 | 10 | 104 | rRNA |
| processing                         |          |             |             |    |     |      |

STable4\_20PerPair

|                                                 |          |             |             |    |     |      |
|-------------------------------------------------|----------|-------------|-------------|----|-----|------|
| GO:0022613                                      | 1.93E-09 | 10.84304245 | 1.447996678 | 13 | 225 |      |
| ribonucleoprotein complex biogenesis            |          |             |             |    |     |      |
| GO:0016072                                      | 2.06E-09 | 17.17831325 | 0.707909487 | 10 | 110 | rRNA |
| metabolic process                               |          |             |             |    |     |      |
| GO:0042254                                      | 2.85E-09 | 13.82290562 | 0.958895578 | 11 | 149 |      |
| ribosome biogenesis                             |          |             |             |    |     |      |
| GO:0071843                                      | 4.02E-09 | 10.16128319 | 1.53809425  | 13 | 239 |      |
| cellular component biogenesis at cellular level |          |             |             |    |     |      |
| GO:0000028                                      | 2.39E-08 | 322.6067416 | 0.038613245 | 4  | 6   |      |
| ribosomal small subunit assembly                |          |             |             |    |     |      |

STable4\_20PerPair

|                                                  |          |             |             |    |     |
|--------------------------------------------------|----------|-------------|-------------|----|-----|
| GO:0034470<br>ncRNA processing                   | 6.13E-07 | 8.984147115 | 1.287108159 | 10 | 200 |
| GO:0042273<br>ribosomal large subunit biogenesis | 7.65E-07 | 80.61797753 | 0.07722649  | 4  | 12  |
| GO:0042255<br>ribosome assembly                  | 2.76E-06 | 53.73033708 | 0.102968653 | 4  | 16  |
| GO:0030490<br>maturation of SSU-rRNA             | 8.86E-06 | 119.6166667 | 0.045048786 | 3  | 7   |
| GO:0034660<br>ncRNA metabolic process            | 1.45E-05 | 6.169989047 | 1.834129126 | 10 | 285 |



STable4\_20PerPair

| Tissue: whole_Blood=>Adipose_Subcutaneous                                  | Type: | cluster |
|----------------------------------------------------------------------------|-------|---------|
| SourceGene: SPRR2E(ENSG00000203785.4)                                      |       |         |
| TargetGeneSet: RPL22 RP11 RPL11 RP4 RPS8 RPL5 LCE2C S100A13                |       |         |
| CICP13 B3GALNT2 PREPL UBC LONRF2 RPL31 R3HDM1 EEF1B2 SP100                 |       |         |
| CHL1-AS2 RPL32 UBE2E1 GORASP1 RHOA RNF123 FAM208A RPL24 EIF4G1 LPP         |       |         |
| RPL35A UBE2D3 RPL34 FRG1 CTD BTF3 DTWD2 HINT1 UBE2B PAIP2                  |       |         |
| RPS14 SLU7 GRM4 RPL39P3 ASCC3 TNRC18 DAGLB RP9 CUX1 GTF2E2                 |       |         |
| RPS20 RPL30 PLEC RPS6 FOXD4L5 CALML5 RPS24 KLLN GBF1 NSMCE4A FAU           |       |         |
| CCND1 RPS25 ING4 USP5 CLEC2B KRT5 PFDN5 RPL41 RPS7P10 TPT1                 |       |         |
| COMMD6 NGDN KLHDC2 CGRRF1 SNW1 HERC2 CCNDBP1 RPS3AP6 RPS17L SEC11A TSC2    |       |         |
| GTF3C1 YPEL3 IST1 TERF2IP MYBBP1A RPL26 RPL23A ZNHIT3 RPL17 RPL19          |       |         |
| KRT10 RPL27 RPS26P8 PNPO RPTOR DSG1 WDR7 PIP5K1C C19orf43                  |       |         |
| CASP14 DMWD CCDC106 CHMP4B TH1L PPIL2 TTC28 RPL3 PHF16 RPS4X               |       |         |
| RPL39 RP1 FLNA                                                             |       |         |
| GOBPID Pvalue OddsRatio ExpCount Count Size Term                           |       |         |
| GO:0006415 7.72884393684555e-39 91.3678977272727 0.585634212165248         |       |         |
| 27 91 translational termination                                            |       |         |
| GO:0006414 8.37337098585874e-39 79.8937062937063 0.675731783267594         |       |         |
| 28 105 translational elongation                                            |       |         |
| GO:0006614 8.37337098585874e-39 79.8937062937063 0.675731783267594         |       |         |
| 28 105 SRP-dependent cotranslational protein targeting to membrane         |       |         |
| GO:0006613 1.13294458388643e-38 78.8639053254438 0.682167324060619         |       |         |
| 28 106 cotranslational protein targeting to membrane                       |       |         |
| GO:0045047 1.13294458388643e-38 78.8639053254438 0.682167324060619         |       |         |
| 28 106 protein targeting to ER                                             |       |         |
| GO:0072599 1.13294458388643e-38 78.8639053254438 0.682167324060619         |       |         |
| 28 106 establishment of protein localization to endoplasmic reticulum      |       |         |
| GO:0070972 3.34821915675842e-37 68.2912820512821 0.759393813576915         |       |         |
| 28 118 protein localization to endoplasmic reticulum                       |       |         |
| GO:0000184 4.35928217000196e-37 67.5360946745562 0.76582935436994          |       |         |
| 28 119 nuclear-transcribed mRNA catabolic process, nonsense-mediated decay |       |         |
| GO:0019080 1.26227486656478e-35 52.874487704918 0.97176665974673 29        |       |         |
| 151 viral genome expression                                                |       |         |
| GO:0019083 1.26227486656478e-35 52.874487704918 0.97176665974673 29        |       |         |
| 151 viral transcription                                                    |       |         |
| GO:0006413 1.55314173234673e-35 52.4409298780488 0.978202200539755         |       |         |
| 29 152 translational initiation                                            |       |         |
| GO:0006612 9.70480562031126e-34 49.0491076923077 0.98463774133278          |       |         |
| 28 153 protein targeting to membrane                                       |       |         |
| GO:0000956 1.90901476025287e-32 43.4343698854337 1.08760639402118          |       |         |
| 28 169 nuclear-transcribed mRNA catabolic process                          |       |         |
| GO:0043624 4.65639857893906e-32 46.2077922077922 0.98463774133278          |       |         |
| 27 153 cellular protein complex disassembly                                |       |         |
| GO:0006402 8.90346234957301e-32 40.8024615384615 1.1455262611584 28        |       |         |
| 178 mRNA catabolic process                                                 |       |         |
| GO:0043241 1.17784356769807e-31 44.4285218598196 1.0168154452979 27        |       |         |
| 158 protein complex disassembly                                            |       |         |
| GO:0034623 1.86496318324784e-30 39.5482374768089 1.1197840979863 27        |       |         |
| 174 cellular macromolecular complex disassembly                            |       |         |
| GO:0032984 4.17269589186328e-30 38.2338516746412 1.15196180195142          |       |         |
| 27 179 macromolecular complex disassembly                                  |       |         |
| GO:0072594 4.87501965816886e-30 34.7111888111888 1.31285032177704          |       |         |
| 28 204 establishment of protein localization to organelle                  |       |         |
| GO:0006401 5.62137155944716e-30 34.5126466753585 1.31928586257006          |       |         |
| 28 205 RNA catabolic process                                               |       |         |
| GO:0019058 5.71349547817322e-30 31.7546410891089 1.48660992318871          |       |         |
| 29 231 viral infectious cycle                                              |       |         |
| GO:0022415 1.92259800752942e-28 27.7112418831169 1.67324060618642          |       |         |
| 29 260 viral reproductive process                                          |       |         |
| GO:0071845 2.58264470548763e-27 25.0604779411765 1.82769358521902          |       |         |
| 29 284 cellular component disassembly at cellular level                    |       |         |

Stable4\_20PerPair

|                                             |                      |                                                                |                    |
|---------------------------------------------|----------------------|----------------------------------------------------------------|--------------------|
| GO:0022411                                  | 3.88927150912513e-27 | 24.6664454633205                                               | 1.85343574839111   |
| 29                                          | 288                  | cellular component disassembly                                 |                    |
| GO:0033365                                  | 1.46869717982695e-24 | 16.5549236087878                                               | 3.04401079510068   |
| 32                                          | 473                  | protein localization to organelle                              |                    |
| GO:0006605                                  | 2.55084263704195e-23 | 15.7054176072235                                               | 3.05044633589371   |
| 31                                          | 474                  | protein targeting                                              |                    |
| GO:0016032                                  | 9.34258344922867e-23 | 15.7640538400633                                               | 2.90242889765414   |
| 30                                          | 451                  | viral reproduction                                             |                    |
| GO:0042274                                  | 1.05243575360753e-09 | 82.448275862069                                                | 0.115839734274445  |
| 18                                          |                      | ribosomal small subunit biogenesis                             | 6                  |
| GO:0006364                                  | 1.18066354692682e-09 | 18.2824916688029                                               | 0.669296242474569  |
| 10                                          | 104                  | rRNA processing                                                |                    |
| GO:0022613                                  | 1.93229251667979e-09 | 10.8430424528302                                               | 1.44799667843056   |
| 13                                          | 225                  | ribonucleoprotein complex biogenesis                           |                    |
| GO:0016072                                  | 2.0556344921674e-09  | 17.178313253012                                                | 0.707909487232717  |
| 110                                         |                      | rRNA metabolic process                                         | 10                 |
| GO:0042254                                  | 2.85318349956482e-09 | 13.8229056203606                                               | 0.958895578160681  |
| 11                                          | 149                  | ribosome biogenesis                                            |                    |
| GO:0071843                                  | 4.02171194587049e-09 | 10.1612831858407                                               | 1.5380942495329    |
| 239                                         |                      | cellular component biogenesis at cellular level                | 13                 |
| GO:0000028                                  | 2.38750166526337e-08 | 322.606741573034                                               | 0.0386132447581482 |
| 4                                           | 6                    | ribosomal small subunit assembly                               |                    |
| GO:0034470                                  | 6.13445314774594e-07 | 8.98414711477489                                               | 1.28710815860494   |
| 10                                          | 200                  | ncRNA processing                                               |                    |
| GO:0042273                                  | 7.64878389605521e-07 | 80.6179775280899                                               | 0.0772264895162964 |
| 4                                           | 12                   | ribosomal large subunit biogenesis                             |                    |
| GO:0042255                                  | 2.75732673726494e-06 | 53.7303370786517                                               | 0.102968652688395  |
| 4                                           | 16                   | ribosome assembly                                              |                    |
| GO:0030490                                  | 8.86430808154284e-06 | 119.616666666667                                               | 0.0450487855511729 |
| 3                                           | 7                    | maturation of SSU-rRNA                                         |                    |
| GO:0034660                                  | 1.45155741712303e-05 | 6.16998904709748                                               | 1.83412912601204   |
| 10                                          | 285                  | ncRNA metabolic process                                        |                    |
| Tissue: Artery_Tibial=>Adipose_Subcutaneous |                      | Type: asymmetric                                               |                    |
| SourceGene: C11orf31(ENSG00000211450.4)     |                      |                                                                |                    |
| TargetGeneSet:                              | SDHB                 | RPL11                                                          | USP1               |
| MRPL55                                      | TOMM20               | FOSL2                                                          | UBC                |
| RPL29                                       | EIF2S1               | PDCD10                                                         | PARL               |
| SNX2                                        | HINT1                | CTB                                                            | RPS14              |
| RPS10                                       | RP1                  | RWDD1                                                          | C6orf72            |
| RPS20                                       | SNHG6                | RPL30                                                          | POLR2K             |
| RPS24                                       | RPP30                | HBG2                                                           | RPL27A             |
| PFDN5                                       | RBMS2                | SLC25A3                                                        | ARL6IP4            |
| SEC11A                                      | RPL23A               | RPL17                                                          | RPL19              |
| RPL36                                       | EIF3K                | EID2B                                                          | RPL18              |
| SLC25A6                                     | RBM3                 |                                                                |                    |
| GOBPID                                      | Pvalue               | OddsRatio                                                      | ExpCount           |
| GO:0006414                                  | 3.08424583132542e-29 | 63.110843373494                                                | 0.595806518580029  |
| 105                                         |                      | translational elongation                                       | 22                 |
| GO:0006614                                  | 3.08424583132542e-29 | 63.110843373494                                                | 0.595806518580029  |
| 105                                         |                      | SRP-dependent cotranslational protein targeting to membrane    | 22                 |
| GO:0006613                                  | 3.87646818659544e-29 | 62.3551587301587                                               | 0.601480866376029  |
| 22                                          | 106                  | cotranslational protein targeting to membrane                  |                    |
| GO:0045047                                  | 3.87646818659544e-29 | 62.3551587301587                                               | 0.601480866376029  |
| 22                                          | 106                  | protein targeting to ER                                        |                    |
| GO:0072599                                  | 3.87646818659544e-29 | 62.3551587301587                                               | 0.601480866376029  |
| 22                                          | 106                  | establishment of protein localization to endoplasmic reticulum |                    |
| GO:0006415                                  | 6.93494022351022e-29 | 70.3229508196721                                               | 0.516365649436025  |
| 21                                          | 91                   | translational termination                                      |                    |
| GO:0006413                                  | 9.992261528195e-29   | 46.0377155172414                                               | 0.862500864992042  |
| 24                                          | 152                  | translational initiation                                       |                    |
| GO:0070972                                  | 5.04596411503333e-28 | 54.5149305555556                                               | 0.669573039928033  |
| 22                                          | 118                  | protein localization to endoplasmic reticulum                  |                    |
| GO:0019080                                  | 3.82882451442477e-27 | 43.3716896186441                                               | 0.856826517196042  |

STable4\_20PerPair

|                                             |          |                                                                     |                  |                   |          |                   |        |                   |        |
|---------------------------------------------|----------|---------------------------------------------------------------------|------------------|-------------------|----------|-------------------|--------|-------------------|--------|
| 23                                          | 151      | viral genome expression                                             |                  |                   |          |                   |        |                   |        |
| GO:0019083                                  |          | 3.82882451442477e-27                                                | 43.3716896186441 |                   |          |                   |        | 0.856826517196042 |        |
| 23                                          | 151      | viral transcription                                                 |                  |                   |          |                   |        |                   |        |
| GO:0072594                                  |          | 4.65097648153165e-27                                                | 34.7691855336666 |                   |          |                   |        | 1.15756695038406  |        |
| 25                                          | 204      | establishment of protein localization to organelle                  |                  |                   |          |                   |        |                   |        |
| GO:0000184                                  |          | 3.24271177524783e-26                                                | 50.132318501171  | 0.675247387724033 |          |                   |        |                   | 21     |
| 119                                         |          | nuclear-transcribed mRNA catabolic process, nonsense-mediated decay |                  |                   |          |                   |        |                   |        |
| GO:0006612                                  |          | 2.19839305005828e-25                                                | 39.8519083969466 |                   |          |                   |        | 0.868175212788042 |        |
| 22                                          | 153      | protein targeting to membrane                                       |                  |                   |          |                   |        |                   |        |
| GO:0019058                                  |          | 3.33679887462828e-24                                                | 28.3098450774613 |                   |          |                   |        | 1.31077434087606  |        |
| 24                                          | 231      | viral infectious cycle                                              |                  |                   |          |                   |        |                   |        |
| GO:0043624                                  |          | 8.56702202828602e-24                                                | 37.1307749627422 |                   |          |                   |        | 0.868175212788042 |        |
| 21                                          | 153      | cellular protein complex disassembly                                |                  |                   |          |                   |        |                   |        |
| GO:0043241                                  |          | 1.72967910578967e-23                                                | 35.7630728730406 |                   |          |                   |        | 0.896546951768044 |        |
| 21                                          | 158      | protein complex disassembly                                         |                  |                   |          |                   |        |                   |        |
| GO:0022415                                  |          | 5.86835954597837e-23                                                | 24.7802454704851 |                   |          |                   |        | 1.47533042696007  |        |
| 24                                          | 260      | viral reproductive process                                          |                  |                   |          |                   |        |                   |        |
| GO:0000956                                  |          | 7.47061096541792e-23                                                | 33.0794195835179 |                   |          |                   |        | 0.958964777524047 |        |
| 21                                          | 169      | nuclear-transcribed mRNA catabolic process                          |                  |                   |          |                   |        |                   |        |
| GO:0034623                                  |          | 1.40371466395077e-22                                                | 31.9871423979428 |                   |          |                   |        | 0.987336516504048 |        |
| 21                                          | 174      | cellular macromolecular complex disassembly                         |                  |                   |          |                   |        |                   |        |
| GO:0006402                                  |          | 2.29223431219755e-22                                                | 31.1634123420695 |                   |          |                   |        | 1.01003390768805  |        |
| 21                                          | 178      | mRNA catabolic process                                              |                  |                   |          |                   |        |                   |        |
| GO:0032984                                  |          | 2.58632388693747e-22                                                | 30.9639966798091 |                   |          |                   |        | 1.01570825548405  |        |
| 21                                          | 179      | macromolecular complex disassembly                                  |                  |                   |          |                   |        |                   |        |
| GO:0006401                                  |          | 4.71128993918159e-21                                                | 26.5400035637919 |                   |          |                   |        | 1.16324129818006  |        |
| 21                                          | 205      | RNA catabolic process                                               |                  |                   |          |                   |        |                   |        |
| GO:0016032                                  |          | 1.15092522315007e-19                                                | 15.2329411764706 |                   |          |                   |        | 2.55913085599612  |        |
| 26                                          | 451      | viral reproduction                                                  |                  |                   |          |                   |        |                   |        |
| GO:0071845                                  |          | 4.33331843302748e-18                                                | 18.4645016518108 |                   |          |                   |        | 1.61151477406408  |        |
| 21                                          | 284      | cellular component disassembly at cellular level                    |                  |                   |          |                   |        |                   |        |
| GO:0033365                                  |          | 5.3770560060619e-18                                                 | 13.6287985588972 |                   |          |                   |        | 2.68396650750813  |        |
| 25                                          | 473      | protein localization to organelle                                   |                  |                   |          |                   |        |                   |        |
| GO:0006605                                  |          | 5.65427916447554e-18                                                | 13.597468057672  | 2.68964085530413  |          |                   |        |                   | 25     |
| 474                                         |          | protein targeting                                                   |                  |                   |          |                   |        |                   |        |
| GO:0022411                                  |          | 5.7800394069971e-18                                                 | 18.1827224166513 |                   |          |                   |        | 1.63421216524808  |        |
| 21                                          | 288      | cellular component disassembly                                      |                  |                   |          |                   |        |                   |        |
| Tissue: Artery_Tibial=>Adipose_Subcutaneous |          |                                                                     |                  | Type: asymmetric  |          |                   |        |                   |        |
| SourceGene:                                 |          | CHCHD2(ENSG00000106153.12)                                          |                  |                   |          |                   |        |                   |        |
| TargetGeneSet:                              | PARK7    | RPL11                                                               | RP4              | NDUFS5            | SNRPE    | ACP1              | TPRKB  | RPL31             | MTX2   |
| RPL32                                       | RNF7     | RPL35A                                                              | NDUFS4           | MRPS36            | TAF9     | BTF3              | TBCA   | RPS23             | COX7C  |
| CETN3                                       | CTD      | HINT1                                                               | RPS14            | CTB               | C6orf130 | RHAG              | RWDD1  | RP11              |        |
| SEC61G                                      | ECD      | POP7                                                                | NDUFA5           | RPS20             | SNHG6    | UQCRB             | RPL30  | NDUFB9            | DCTN3  |
| SEC61B                                      | RPL35    | COMMD3                                                              | VDAC2            | C11orf10          |          | ATP5L             | RPS25  | PHB2              | PFDN5  |
| DIABLO                                      | ARL6IP4  | MZT1                                                                | CGRRF1           | RPS17L            | SEC11A   | NDUFAB1           | SPAG7  | RPS7P1            | RPL17  |
| FBXO47                                      | RPL19    | RPL27                                                               | ATP5H            | ARL16             | RPL36    | CHST8             | COX6B1 | EIF3K             | SNRPD2 |
| ATP5J                                       | RPL18AP2 |                                                                     | POLR2F           | RBM3              |          |                   |        |                   |        |
| GOBPID                                      | Pvalue   | OddsRatio                                                           | ExpCount         | Count             | Size     | Term              |        |                   |        |
| GO:0006614                                  |          | 7.03976132543265e-25                                                | 68.8195669607057 |                   |          | 0.443221922358314 |        |                   |        |
| 18                                          | 105      | SRP-dependent cotranslational protein targeting to membrane         |                  |                   |          |                   |        |                   |        |
| GO:0006613                                  |          | 8.45565769191813e-25                                                | 68.0327695560254 |                   |          | 0.447443083523632 |        |                   |        |
| 18                                          | 106      | cotranslational protein targeting to membrane                       |                  |                   |          |                   |        |                   |        |
| GO:0045047                                  |          | 8.45565769191813e-25                                                | 68.0327695560254 |                   |          | 0.447443083523632 |        |                   |        |
| 18                                          | 106      | protein targeting to ER                                             |                  |                   |          |                   |        |                   |        |
| GO:0072599                                  |          | 8.45565769191813e-25                                                | 68.0327695560254 |                   |          | 0.447443083523632 |        |                   |        |
| 18                                          | 106      | establishment of protein localization to endoplasmic reticulum      |                  |                   |          |                   |        |                   |        |
| GO:0070972                                  |          | 6.63760362954319e-24                                                | 59.8186046511628 |                   |          | 0.498097017507439 |        |                   |        |
| 18                                          | 118      | protein localization to endoplasmic reticulum                       |                  |                   |          |                   |        |                   |        |
| GO:0006612                                  |          | 8.92627169749687e-22                                                | 44.2015503875969 |                   |          | 0.645837658293544 |        |                   |        |
| 18                                          | 153      | protein targeting to membrane                                       |                  |                   |          |                   |        |                   |        |
| GO:0072594                                  |          | 5.29130411215114e-21                                                | 34.7355212355212 |                   |          | 0.861116877724725 |        |                   |        |
| 19                                          | 204      | establishment of protein localization to organelle                  |                  |                   |          |                   |        |                   |        |
| GO:0006415                                  |          | 1.62079772068301e-20                                                | 61.4159038901602 |                   |          | 0.384125666043872 |        |                   |        |

STable4\_20PerPair

|            |     |                                                                     |                  |                    |    |
|------------|-----|---------------------------------------------------------------------|------------------|--------------------|----|
| 15         | 91  | translational termination                                           |                  |                    |    |
| GO:0006414 |     | 1.57744928897971e-19                                                | 51.8115942028985 | 0.443221922358314  |    |
| 15         | 105 | translational elongation                                            |                  |                    |    |
| GO:0000184 |     | 1.12470471296061e-18                                                | 44.7930602006689 | 0.502318178672756  |    |
| 15         | 119 | nuclear-transcribed mRNA catabolic process, nonsense-mediated decay |                  |                    |    |
| GO:0019080 |     | 1.21742447933262e-18                                                | 37.5440329218107 | 0.637395335962909  |    |
| 16         | 151 | viral genome expression                                             |                  |                    |    |
| GO:0019083 |     | 1.21742447933262e-18                                                | 37.5440329218107 | 0.637395335962909  |    |
| 16         | 151 | viral transcription                                                 |                  |                    |    |
| GO:0006413 |     | 1.35662886591628e-18                                                | 37.2653594771242 | 0.641616497128226  |    |
| 16         | 152 | translational initiation                                            |                  |                    |    |
| GO:0043624 |     | 5.43998896255014e-17                                                | 33.6767485822306 | 0.645837658293544  |    |
| 15         | 153 | cellular protein complex disassembly                                |                  |                    |    |
| GO:0043241 |     | 8.88382813665698e-17                                                | 32.4878382487078 | 0.66694346412013   |    |
| 15         | 158 | protein complex disassembly                                         |                  |                    |    |
| GO:0000956 |     | 2.46953791183705e-16                                                | 30.1439864483343 | 0.71337623693862   |    |
| 15         | 169 | nuclear-transcribed mRNA catabolic process                          |                  |                    |    |
| GO:0034623 |     | 3.83904766757613e-16                                                | 29.1858080393765 | 0.734482042765207  |    |
| 15         | 174 | cellular macromolecular complex disassembly                         |                  |                    |    |
| GO:0006402 |     | 5.41099421018376e-16                                                | 28.4615897572686 | 0.751366687426476  |    |
| 15         | 178 | mRNA catabolic process                                              |                  |                    |    |
| GO:0032984 |     | 5.8881056306774e-16                                                 | 28.2860551431601 | 0.755587848591793  |    |
| 15         | 179 | macromolecular complex disassembly                                  |                  |                    |    |
| GO:0019058 |     | 1.15687302256038e-15                                                | 23.4418604651163 | 0.975088229188292  |    |
| 16         | 231 | viral infectious cycle                                              |                  |                    |    |
| GO:0006401 |     | 4.50225390318053e-15                                                | 24.370709382151  | 0.865338038890042  | 15 |
| 205        | RNA | catabolic process                                                   |                  |                    |    |
| GO:0022415 |     | 7.47946083592459e-15                                                | 20.6134790528233 | 1.09750190298249   |    |
| 16         | 260 | viral reproductive process                                          |                  |                    |    |
| GO:0033365 |     | 3.54667723281708e-14                                                | 13.8863016572268 | 1.99660923119507   |    |
| 19         | 473 | protein localization to organelle                                   |                  |                    |    |
| GO:0006605 |     | 3.6842870520675e-14                                                 | 13.8547880690738 | 2.00083039236039   |    |
| 19         | 474 | protein targeting                                                   |                  |                    |    |
| GO:0022904 |     | 1.96361923406354e-13                                                | 37.0247058823529 | 0.405231471870459  |    |
| 11         | 96  | respiratory electron transport chain                                |                  |                    |    |
| GO:0071845 |     | 5.46390082962498e-13                                                | 17.1177468886375 | 1.19880977095011   |    |
| 15         | 284 | cellular component disassembly at cellular level                    |                  |                    |    |
| GO:0022411 |     | 6.69346400676617e-13                                                | 16.8621595795509 | 1.21569441561138   |    |
| 15         | 288 | cellular component disassembly                                      |                  |                    |    |
| GO:0016032 |     | 2.84394503268349e-12                                                | 12.424172601592  | 1.90374368555809   | 17 |
| 451        |     | viral reproduction                                                  |                  |                    |    |
| GO:0022900 |     | 8.10682903244319e-12                                                | 25.5182113821138 | 0.565635596152515  |    |
| 11         | 134 | electron transport chain                                            |                  |                    |    |
| GO:0045333 |     | 1.53232386652478e-11                                                | 23.9464122137405 | 0.599404885475054  |    |
| 11         | 142 | cellular respiration                                                |                  |                    |    |
| GO:0015980 |     | 4.68549160853122e-09                                                | 11.7011414735386 | 1.2958964777524    | 12 |
| 307        |     | energy derivation by oxidation of organic compounds                 |                  |                    |    |
| GO:0042773 |     | 4.12663652303786e-08                                                | 38.1791574279379 | 0.198394574769912  |    |
| 6          | 47  | ATP synthesis coupled electron transport                            |                  |                    |    |
| GO:0042775 |     | 4.12663652303786e-08                                                | 38.1791574279379 | 0.198394574769912  |    |
| 6          | 47  | mitochondrial ATP synthesis coupled electron transport              |                  |                    |    |
| GO:0006119 |     | 1.50061983272357e-07                                                | 30.0797202797203 | 0.244827347588402  |    |
| 6          | 58  | oxidative phosphorylation                                           |                  |                    |    |
| GO:0006091 |     | 1.82777171040905e-07                                                | 8.22645211930926 | 1.8066569787558    | 12 |
| 428        |     | generation of precursor metabolites and energy                      |                  |                    |    |
| GO:0006120 |     | 3.8658007803264e-07                                                 | 41.3565668202765 | 0.151961801951422  |    |
| 5          | 36  | mitochondrial electron transport, NADH to ubiquinone                |                  |                    |    |
| GO:0000028 |     | 1.4185070319737e-06                                                 | 248.051724137931 | 0.0253269669919037 |    |
| 3          | 6   | ribosomal small subunit assembly                                    |                  |                    |    |
| GO:0022618 |     | 2.85536039820472e-06                                                | 17.529315628192  | 0.401010310705142  | 6  |
| 95         |     | ribonucleoprotein complex assembly                                  |                  |                    |    |
| GO:0071826 |     | 3.85292758948488e-06                                                | 16.5911025145068 | 0.422116116531728  |    |
| 6          | 100 | ribonucleoprotein complex subunit organization                      |                  |                    |    |

Stable4\_20PerPair

|                                             |                      |                                                      |                      |                  |                  |                                                                     |          |         |         |      |
|---------------------------------------------|----------------------|------------------------------------------------------|----------------------|------------------|------------------|---------------------------------------------------------------------|----------|---------|---------|------|
| GO:0022613                                  | 4.41542322260067e-06 | 9.85862098947918                                     | 0.949761262196388    |                  |                  |                                                                     |          |         |         |      |
| 8                                           | 225                  | ribonucleoprotein complex biogenesis                 |                      |                  |                  |                                                                     |          |         |         |      |
| GO:0071843                                  | 6.88629834733271e-06 | 9.25198072367884                                     | 1.00885751851083     |                  |                  |                                                                     |          |         |         |      |
| 8                                           | 239                  | cellular component biogenesis at cellular level      |                      |                  |                  |                                                                     |          |         |         |      |
| GO:0042776                                  | 1.98613510017866e-05 | 74.3793103448276                                     | 0.0548750951491246   |                  |                  |                                                                     |          |         |         |      |
| 3                                           | 13                   | mitochondrial ATP synthesis coupled proton transport |                      |                  |                  |                                                                     |          |         |         |      |
| Tissue: Artery_Tibial=>Adipose_Subcutaneous |                      | Type: cluster                                        |                      |                  |                  |                                                                     |          |         |         |      |
| SourceGene:                                 | ENSG00000233280.1    |                                                      |                      |                  |                  |                                                                     |          |         |         |      |
| TargetGeneSet:                              | RP1                  | RPL22                                                | VPS13D               | DDI2             | HSPG2            | SYF2                                                                | PPP1R8   | RP4     | MFI2    |      |
| PTPRF                                       | RPS8                 | RPS15AP10                                            | BTF3L4               | GNNG5            | CCBL2            | RPL5                                                                | BCAS2    | MRPS21  |         |      |
| LCE2C                                       | ASH1L                | SSR2                                                 | F11R                 | TKT              | PRRC2C           | ABL2                                                                | RP11     | CEP350  | RABIF   |      |
| Clorf31                                     | ACP1                 | RPS7                                                 | EIF2AK1              | PRKD3            | COX7A2L          | RHOQ                                                                | UBC      | REL     | USP34   | TET3 |
| RANBP2                                      | MMADHC               | ACVR1C                                               | MLK7-AS1             | MTX2             | COQ10B           | NBEAL1                                                              | EFHD1    | GIGYF2  |         |      |
| SETD5                                       | RPL32                | NR2C2                                                | UBE2E1               | RPL15            | HIGD1A           | RAD54L2                                                             | CTD      | EBLN2   | CRYBG3  | PCNP |
| RPL24                                       | RNF7                 | COMMD2                                               | PDCD10               | PHC3             | DNAJC19          | RPL35A                                                              | RELL1    | OCIAD1  | COPS4   |      |
| HSP90AB3P                                   | AIMP1                | RPL34                                                | OSMR                 | NDUFAB2          | MRPS36           | TAF9                                                                | BTF3     | TBCA    |         |      |
| CETN3                                       | ERAP1                | HINT1                                                | AFF4                 | SKP1             | UBE2B            | CAMLG                                                               | CTB      | UBE2D2  | CD14    |      |
| PCDHGB3                                     | ADRA1B               | SLC2A3P1                                             | PHACTR1              | NOL7             | HLA-H            | PGBD1                                                               | RNF5     | RPS10   |         |      |
| RPL10A                                      | WDR11                | ASF1A                                                | RP3                  | IGF2R            | ADCY1            | BAIAP2L1                                                            | TRRAP    | TRIP6   | CUX1    |      |
| BCAP29                                      | MLL3                 | DCTN6                                                | HOOK3                | FNTA             | POLR2K           | UBR5                                                                | MED30    | TRAPPC9 | EIF2C2  |      |
| HEATR7A                                     | C9orf82              | TLN1                                                 | CLTA                 | CBWD3            | ATP6V1G1         | PSMB7                                                               | SETX     | RPL7A   |         |      |
| COMMD3                                      | RPS24                | GVINP2                                               | RPL27A               | SBF2             | TSG101           | PPP6R3                                                              | NUMA1    | CWC15   | UBE4A   |      |
| RPS25                                       | C12orf57             |                                                      | H2AFJ                | SCAF11           | MLL4             | PFDN5                                                               | COPZ1    | SMARCC2 | BAZ2A   |      |
| STAT6                                       | LRP1                 | RBMS1P1                                              | HELB                 | RAP1B            | KITLG            | SSH1                                                                | MLXIP    | DGKH    | ESD     | MZT1 |
| DCUN1D2-AS2                                 |                      | CCNB1IP1                                             |                      | PPP2R3C          | QRSL1P3          | TRAPPC6B                                                            | CGRRF1   | DNAL1   |         |      |
| DYNC1H1                                     | CYFIP1               | GANC                                                 | RPS3AP6              | DENND4A          | RAB11A           | MORF4L1                                                             | KIAA1199 | SEC11A  | SELS    |      |
| TSC2                                        | SRRM2                | RPS15A                                               | SRCAP                | CNOT1            | CFDP1            | MON1B                                                               | HSBP1    | VPS53   | MINK1   |      |
| CCDC144B                                    |                      | RPL23A                                               | MYO18A               | TAOK1            | RPL19            | CDK12                                                               | RPL27    | NSFP1   | SUPT4H1 |      |
| PRKCA                                       | PGS1                 | RP13                                                 | MYL12A               | PSMG2            | C18orf32         |                                                                     | CD209    | BRD4    | ZNF573  |      |
| SIPA1L3                                     | EIF3K                | EID2B                                                | CYP2A6               | DEDD2            | MEGF8            | SNRPD2                                                              | RPL18    | NUCB1   | RPS9    |      |
| ZNF587                                      | RPS5                 | RPL12P4                                              | SON                  | PI4KA            | RPL9P7           | USP9X                                                               | UXT      | KDM5C   | HUWE1   |      |
| GNL3L                                       | RBM41                | RPL39                                                | HCFC1                | RPL10            |                  |                                                                     |          |         |         |      |
| GOBPID                                      | Pvalue               | OddsRatio                                            | ExpCount             | Count            | Size             | Term                                                                |          |         |         |      |
| GO:0006614                                  | 27                   | 105                                                  | 3.60452441375796e-28 | 31.2839294463498 |                  | 1.33693170022836                                                    |          |         |         |      |
|                                             |                      |                                                      |                      |                  |                  | SRP-dependent cotranslational protein targeting to membrane         |          |         |         |      |
| GO:0006613                                  | 27                   | 106                                                  | 4.78547717282206e-28 | 30.8857534467468 |                  | 1.34966438308768                                                    |          |         |         |      |
|                                             |                      |                                                      |                      |                  |                  | cotranslational protein targeting to membrane                       |          |         |         |      |
| GO:0045047                                  | 27                   | 106                                                  | 4.78547717282206e-28 | 30.8857534467468 |                  | 1.34966438308768                                                    |          |         |         |      |
|                                             |                      |                                                      |                      |                  |                  | protein targeting to ER                                             |          |         |         |      |
| GO:0072599                                  | 27                   | 106                                                  | 4.78547717282206e-28 | 30.8857534467468 |                  | 1.34966438308768                                                    |          |         |         |      |
|                                             |                      |                                                      |                      |                  |                  | establishment of protein localization to endoplasmic reticulum      |          |         |         |      |
| GO:0006415                                  | 25                   | 91                                                   | 6.14875651840199e-27 | 33.8312368972746 |                  | 1.15867414019791                                                    |          |         |         |      |
|                                             |                      |                                                      |                      |                  |                  | translational termination                                           |          |         |         |      |
| GO:0070972                                  | 27                   | 118                                                  | 1.13952422292122e-26 | 26.7902288794009 |                  | 1.50245657739949                                                    |          |         |         |      |
|                                             |                      |                                                      |                      |                  |                  | protein localization to endoplasmic reticulum                       |          |         |         |      |
| GO:0006414                                  | 25                   | 105                                                  | 3.22049758618174e-25 | 27.8832547169811 |                  | 1.33693170022836                                                    |          |         |         |      |
|                                             |                      |                                                      |                      |                  |                  | translational elongation                                            |          |         |         |      |
| GO:0000184                                  | 119                  |                                                      | 9.40671726302102e-24 | 23.707011909541  | 1.51518926025881 |                                                                     | 25       |         |         |      |
|                                             |                      |                                                      |                      |                  |                  | nuclear-transcribed mRNA catabolic process, nonsense-mediated decay |          |         |         |      |
| GO:0019080                                  | 151                  |                                                      | 1.3272647340486e-23  | 19.614803780563  | 1.92263511175697 |                                                                     | 27       |         |         |      |
|                                             |                      |                                                      |                      |                  |                  | viral genome expression                                             |          |         |         |      |
| GO:0019083                                  | 151                  |                                                      | 1.3272647340486e-23  | 19.614803780563  | 1.92263511175697 |                                                                     | 27       |         |         |      |
|                                             |                      |                                                      |                      |                  |                  | viral transcription                                                 |          |         |         |      |
| GO:0006413                                  | 27                   | 152                                                  | 1.59690271830262e-23 | 19.4565095541401 |                  | 1.93536779461629                                                    |          |         |         |      |
|                                             |                      |                                                      |                      |                  |                  | translational initiation                                            |          |         |         |      |
| GO:0006612                                  | 27                   | 153                                                  | 1.9186088076088e-23  | 19.3007279344859 |                  | 1.94810047747561                                                    |          |         |         |      |
|                                             |                      |                                                      |                      |                  |                  | protein targeting to membrane                                       |          |         |         |      |
| GO:0072594                                  | 29                   | 204                                                  | 2.34653730682892e-22 | 15.0661013824885 |                  | 2.59746730330081                                                    |          |         |         |      |
|                                             |                      |                                                      |                      |                  |                  | establishment of protein localization to organelle                  |          |         |         |      |
| GO:0019058                                  | 231                  |                                                      | 6.19337934755397e-22 | 13.632486916069  | 2.94124974050239 |                                                                     | 30       |         |         |      |
|                                             |                      |                                                      |                      |                  |                  | viral infectious cycle                                              |          |         |         |      |
| GO:0022415                                  | 260                  |                                                      | 1.61670274422966e-21 | 12.4205268715929 |                  | 3.3104975434226                                                     | 31       |         |         |      |
|                                             |                      |                                                      |                      |                  |                  | viral reproductive process                                          |          |         |         |      |

Stable4\_20PerPair

|                                             |                              |                                                                     |                   |            |         |                   |         |         |
|---------------------------------------------|------------------------------|---------------------------------------------------------------------|-------------------|------------|---------|-------------------|---------|---------|
| GO:0006401                                  | 4.01545056268925e-21         | 14.2879907286687                                                    | 2.61019998616013  |            |         |                   |         |         |
| 28                                          | 205                          | RNA catabolic process                                               |                   |            |         |                   |         |         |
| GO:0000956                                  | 5.13191516470086e-21         | 16.253164556962                                                     | 2.15182340322469  | 26         |         |                   |         |         |
| 169                                         |                              | nuclear-transcribed mRNA catabolic process                          |                   |            |         |                   |         |         |
| GO:0043624                                  | 6.6319908939653e-21          | 17.3680719339623                                                    | 1.94810047747561  |            |         |                   |         |         |
| 25                                          | 153                          | cellular protein complex disassembly                                |                   |            |         |                   |         |         |
| GO:0034623                                  | 1.10404650952067e-20         | 15.6985118029422                                                    | 2.21548681752128  |            |         |                   |         |         |
| 26                                          | 174                          | cellular macromolecular complex disassembly                         |                   |            |         |                   |         |         |
| GO:0043241                                  | 1.50542847107781e-20         | 16.709225894926                                                     | 2.0117638917722   | 25         | 158     |                   |         |         |
|                                             |                              | protein complex disassembly                                         |                   |            |         |                   |         |         |
| GO:0006402                                  | 2.00110659828975e-20         | 15.2810626249167                                                    | 2.26641754895855  |            |         |                   |         |         |
| 26                                          | 178                          | mRNA catabolic process                                              |                   |            |         |                   |         |         |
| GO:0032984                                  | 2.31627685820607e-20         | 15.1801108629106                                                    | 2.27915023181787  |            |         |                   |         |         |
| 26                                          | 179                          | macromolecular complex disassembly                                  |                   |            |         |                   |         |         |
| GO:0016032                                  | 5.33743806455075e-19         | 8.11904916965158                                                    | 5.74243996955228  |            |         |                   |         |         |
| 36                                          | 451                          | viral reproduction                                                  |                   |            |         |                   |         |         |
| GO:0071845                                  | 2.72366671185017e-18         | 10.2807843137255                                                    | 3.61608193204622  |            |         |                   |         |         |
| 29                                          | 284                          | cellular component disassembly at cellular level                    |                   |            |         |                   |         |         |
| GO:0022411                                  | 4.00080715567273e-18         | 10.1191181965376                                                    | 3.6670126634835   | 29         |         |                   |         |         |
| 288                                         |                              | cellular component disassembly                                      |                   |            |         |                   |         |         |
| GO:0033365                                  | 1.94130986388419e-17         | 7.41649045386289                                                    | 6.02255899245727  |            |         |                   |         |         |
| 35                                          | 473                          | protein localization to organelle                                   |                   |            |         |                   |         |         |
| GO:0006605                                  | 1.5298532013436e-16          | 7.123                                                               | 6.03529167531659  | 34         | 474     |                   |         |         |
|                                             |                              | protein targeting                                                   |                   |            |         |                   |         |         |
| GO:0016570                                  | 1.24741135191901e-06         | 5.05881079520854                                                    | 3.32323022628192  |            |         |                   |         |         |
| 15                                          | 261                          | histone modification                                                |                   |            |         |                   |         |         |
| GO:0016569                                  | 1.65689785694498e-06         | 4.93624964778811                                                    | 3.39962632343782  |            |         |                   |         |         |
| 15                                          | 267                          | covalent chromatin modification                                     |                   |            |         |                   |         |         |
| GO:0016568                                  | 1.68963740738602e-06         | 3.99201515151515                                                    | 5.33499411805411  |            |         |                   |         |         |
| 19                                          | 419                          | chromatin modification                                              |                   |            |         |                   |         |         |
| GO:0071843                                  | 1.18315312369579e-05         | 4.72320550639135                                                    | 3.04311120337693  |            |         |                   |         |         |
| 13                                          | 239                          | cellular component biogenesis at cellular level                     |                   |            |         |                   |         |         |
| GO:0006511                                  | 1.70610103794359e-05         | 3.80925013683634                                                    | 4.63469656079164  |            |         |                   |         |         |
| 16                                          | 364                          | ubiquitin-dependent protein catabolic process                       |                   |            |         |                   |         |         |
| Tissue: Artery_Tibial=>Adipose_Subcutaneous |                              | Type: asymmetric                                                    |                   |            |         |                   |         |         |
| SourceGene:                                 | HIST1H2BI(ENSG00000168242.3) |                                                                     |                   |            |         |                   |         |         |
| TargetGeneSet:                              | STK40                        | RP4                                                                 | RP11              | HIPK1      | MRPS21  | BATF3             | OR7E62P | RPL31   |
| RPL32                                       | RPL35A                       | ATP13                                                               | UBE2QL1           | JARID2-AS1 | FOXPA   | RP1               | MRPS12  | YWHAZP6 |
| VPS13A                                      | RPL12                        | ATP5L                                                               | RPL41             | MLXIP      | RILPL1  | ANKRD20A19P       | RPS15A  | RPL26   |
| C17orf51                                    |                              | RPL17                                                               | VPS25             | RPL27      | ANKRD40 | PIP5K1C           | ZNF823  |         |
| GOBPID                                      | Pvalue                       | OddsRatio                                                           | ExpCount          | Count      | Size    | Term              |         |         |
| GO:0006415                                  | 1.78325549682361e-16         | 118.065843621399                                                    |                   |            |         | 0.157428551657325 |         |         |
| 10                                          | 91                           | translational termination                                           |                   |            |         |                   |         |         |
| GO:0006414                                  | 7.89882819762901e-16         | 100.568421052632                                                    |                   |            |         | 0.181648328835375 |         |         |
| 10                                          | 105                          | translational elongation                                            |                   |            |         |                   |         |         |
| GO:0006614                                  | 7.89882819762901e-16         | 100.568421052632                                                    |                   |            |         | 0.181648328835375 |         |         |
| 10                                          | 105                          | SRP-dependent cotranslational protein targeting to membrane         |                   |            |         |                   |         |         |
| GO:0006613                                  | 8.7133434798242e-16          | 99.5138888888889                                                    |                   |            |         | 0.183378312919521 |         |         |
| 10                                          | 106                          | cotranslational protein targeting to membrane                       |                   |            |         |                   |         |         |
| GO:0045047                                  | 8.7133434798242e-16          | 99.5138888888889                                                    |                   |            |         | 0.183378312919521 |         |         |
| 10                                          | 106                          | protein targeting to ER                                             |                   |            |         |                   |         |         |
| GO:0072599                                  | 8.7133434798242e-16          | 99.5138888888889                                                    |                   |            |         | 0.183378312919521 |         |         |
| 10                                          | 106                          | establishment of protein localization to endoplasmic reticulum      |                   |            |         |                   |         |         |
| GO:0070972                                  | 2.63560516523313e-15         | 88.3827160493827                                                    |                   |            |         | 0.204138121929278 |         |         |
| 10                                          | 118                          | protein localization to endoplasmic reticulum                       |                   |            |         |                   |         |         |
| GO:0000184                                  | 2.87467034349544e-15         | 87.565749235474                                                     | 0.205868106013425 |            |         |                   | 10      |         |
| 119                                         |                              | nuclear-transcribed mRNA catabolic process, nonsense-mediated decay |                   |            |         |                   |         |         |
| GO:0019080                                  | 3.28262315323143e-14         | 67.5413711583924                                                    | 0.26122759670611  |            |         |                   |         |         |
| 10                                          | 151                          | viral genome expression                                             |                   |            |         |                   |         |         |
| GO:0019083                                  | 3.28262315323143e-14         | 67.5413711583924                                                    | 0.26122759670611  |            |         |                   |         |         |
| 10                                          | 151                          | viral transcription                                                 |                   |            |         |                   |         |         |
| GO:0006413                                  | 3.51044963663819e-14         | 67.0610328638498                                                    | 0.262957580790257 |            |         |                   |         |         |
| 10                                          | 152                          | translational initiation                                            |                   |            |         |                   |         |         |

Stable4\_20PerPair

|                                                              |                      |                                                                |                    |
|--------------------------------------------------------------|----------------------|----------------------------------------------------------------|--------------------|
| GO:0006612                                                   | 3.75236081255074e-14 | 66.5874125874126                                               | 0.264687564874403  |
| 10                                                           | 153                  | protein targeting to membrane                                  |                    |
| GO:0043624                                                   | 3.75236081255074e-14 | 66.5874125874126                                               | 0.264687564874403  |
| 10                                                           | 153                  | cellular protein complex disassembly                           |                    |
| GO:0043241                                                   | 5.20125158025491e-14 | 64.3153153153153                                               | 0.273337485295135  |
| 10                                                           | 158                  | protein complex disassembly                                    |                    |
| GO:0000956                                                   | 1.02855993134244e-13 | 59.8197064989518                                               | 0.292367310220746  |
| 10                                                           | 169                  | nuclear-transcribed mRNA catabolic process                     |                    |
| GO:0034623                                                   | 1.38113512859077e-13 | 57.9756097560976                                               | 0.301017230641478  |
| 10                                                           | 174                  | cellular macromolecular complex disassembly                    |                    |
| GO:0006402                                                   | 1.73742476558946e-13 | 56.5793650793651                                               | 0.307937166978064  |
| 10                                                           | 178                  | mRNA catabolic process                                         |                    |
| GO:0032984                                                   | 1.83847693355907e-13 | 56.2406311637081                                               | 0.30966715106221   |
| 10                                                           | 179                  | macromolecular complex disassembly                             |                    |
| GO:0072594                                                   | 6.85030496520499e-13 | 48.9072164948454                                               | 0.352916753165871  |
| 10                                                           | 204                  | establishment of protein localization to organelle             |                    |
| GO:0006401                                                   | 7.19472842217583e-13 | 48.6529914529915                                               | 0.354646737250017  |
| 10                                                           | 205                  | RNA catabolic process                                          |                    |
| GO:0019058                                                   | 2.37606065091673e-12 | 42.8506787330317                                               | 0.399626323437824  |
| 10                                                           | 231                  | viral infectious cycle                                         |                    |
| GO:0022415                                                   | 7.71088005492001e-12 | 37.8026666666667                                               | 0.449795861878071  |
| 10                                                           | 260                  | viral reproductive process                                     |                    |
| GO:0071845                                                   | 1.849551847592e-11   | 34.4330900243309                                               | 0.491315479897585  |
| 10                                                           | 284                  | cellular component disassembly at cellular level               |                    |
| GO:0022411                                                   | 2.12382569663949e-11 | 33.9280575539568                                               | 0.498235416234171  |
| 10                                                           | 288                  | cellular component disassembly                                 |                    |
| GO:0016032                                                   | 1.70492184763235e-09 | 21.1413454270597                                               | 0.780222821950038  |
| 10                                                           | 451                  | viral reproduction                                             |                    |
| GO:0033365                                                   | 2.69983390067445e-09 | 20.1051115910727                                               | 0.818282471801259  |
| 10                                                           | 473                  | protein localization to organelle                              |                    |
| GO:0006605                                                   | 2.75534740067316e-09 | 20.0603448275862                                               | 0.820012455885406  |
| 10                                                           | 474                  | protein targeting                                              |                    |
| Tissue: Artery_Tibial=>Adipose_Subcutaneous Type: asymmetric |                      |                                                                |                    |
| SourceGene: MRPL13(ENSG00000172172.3)                        |                      |                                                                |                    |
| TargetGeneSet:                                               | RP4                  | NDUFS5                                                         | C1orf210           |
| PDCD10                                                       | MRPS36               | CTD                                                            | RP1                |
| COX6C                                                        | SEC61B               | RPL13AP5                                                       | NDUFS3             |
| VPS29                                                        | RPS7P10              | CGRRF1                                                         | RDH11              |
| NPRL3                                                        | NDUFAB1              | TXNDC17                                                        | RPS7P1             |
| COX6B1                                                       | POLR2I               | ZNF569                                                         | SNRPD2             |
| GOBPID                                                       | Pvalue               | OddsRatio                                                      | ExpCount           |
| GO:0022904                                                   | 4.60628960515308e-19 | 77.3734939759036                                               | 0.279011833091136  |
| 13                                                           | 96                   | respiratory electron transport chain                           |                    |
| GO:0022900                                                   | 4.20164127634141e-17 | 52.9335993160445                                               | 0.389454017023043  |
| 13                                                           | 134                  | electron transport chain                                       |                    |
| GO:0045333                                                   | 9.1083609869236e-17  | 49.6230954290297                                               | 0.412705003113971  |
| 13                                                           | 142                  | cellular respiration                                           |                    |
| GO:0015980                                                   | 2.04719997843038e-12 | 21.5218156228008                                               | 0.892256591239361  |
| 13                                                           | 307                  | energy derivation by oxidation of organic compounds            |                    |
| GO:0006091                                                   | 1.31534330343842e-10 | 15.1160781055256                                               | 1.24392775586465   |
| 13                                                           | 428                  | generation of precursor metabolites and energy                 |                    |
| GO:0042773                                                   | 4.08341038300971e-09 | 58.4065040650407                                               | 0.136599543284202  |
| 6                                                            | 47                   | ATP synthesis coupled electron transport                       |                    |
| GO:0042775                                                   | 4.08341038300971e-09 | 58.4065040650407                                               | 0.136599543284202  |
| 6                                                            | 47                   | mitochondrial ATP synthesis coupled electron transport         |                    |
| GO:0006119                                                   | 1.50343407811389e-08 | 46.0160256410256                                               | 0.168569649159228  |
| 6                                                            | 58                   | oxidative phosphorylation                                      |                    |
| GO:0042776                                                   | 4.32334705153945e-08 | 168.421052631579                                               | 0.0377828523977579 |
| 4                                                            | 13                   | mitochondrial ATP synthesis coupled proton transport           |                    |
| GO:0006120                                                   | 5.71898886355174e-08 | 62.6765475152572                                               | 0.104629437409176  |
| 5                                                            | 36                   | mitochondrial electron transport, NADH to ubiquinone           |                    |
| GO:0015985                                                   | 1.83089273168167e-07 | 108.233082706767                                               | 0.0523147187045879 |
| 4                                                            | 18                   | energy coupled proton transport, down electrochemical gradient |                    |

Stable4\_20PerPair

|                                                              |                      |                                        |                      |                  |                   |                                                                     |          |       |          |     |
|--------------------------------------------------------------|----------------------|----------------------------------------|----------------------|------------------|-------------------|---------------------------------------------------------------------|----------|-------|----------|-----|
| GO:0015986                                                   | 1.83089273168167e-07 | 108.233082706767                       | 0.0523147187045879   |                  |                   |                                                                     |          |       |          |     |
| 4                                                            | 18                   | ATP synthesis coupled proton transport |                      |                  |                   |                                                                     |          |       |          |     |
| GO:0006754                                                   | 1.18765230172136e-05 | 33.6                                   | 0.142412289806934    | 4                | 49                |                                                                     |          |       |          |     |
| ATP biosynthetic process                                     |                      |                                        |                      |                  |                   |                                                                     |          |       |          |     |
| Tissue: Artery_Tibial=>Adipose_Subcutaneous Type: asymmetric |                      |                                        |                      |                  |                   |                                                                     |          |       |          |     |
| SourceGene: NDUFA11(ENSG00000174886.7)                       |                      |                                        |                      |                  |                   |                                                                     |          |       |          |     |
| TargetGeneSet:                                               | MINOS1               | RP4                                    | MRPL9                | MIR555           | SNRPE             | RP11                                                                | ACP1     | MORN2 |          |     |
| SOS1-IT1                                                     | C1D                  | TPRKB                                  | RPL31                | HOXD-AS2         |                   | KCTD18                                                              | KRBOX1   | PCNP  |          |     |
| PDCD10                                                       | DNAJC19              | RPL35A                                 | LAMTOR3              | RPL34            | NDUFAF2           | ISCA1P1                                                             | TAF9     | COX7C | CTD      | RP1 |
| CENPQ                                                        | RPL39P3              | NDUFA4                                 | LSM5                 | SEC61G           | SRI               | ECD                                                                 | NDUFA5   | DCTN6 | UQCRB    |     |
| RPL30                                                        | COX6C                | POLR2K                                 | SEC61B               | RPL35            | COMMD3            | RAB18                                                               | C11orf10 | FAU   |          |     |
| TMEM126A                                                     | ATP5L                | RPS25                                  | CCDC59               | SNRPF            | C12orf45          |                                                                     | C14orf28 |       | ERH      |     |
| SLIRP                                                        | RPLP1                | MORF4L1                                | SEC11A               | NDUFAB1          | RPL27             | ICT1                                                                | PFDN4    | ATP5J | EEF1B2P3 |     |
| NDUFB11                                                      | TBL1Y                |                                        |                      |                  |                   |                                                                     |          |       |          |     |
| GOBPID                                                       | Pvalue               | OddsRatio                              | ExpCount             | Count            | Size              | Term                                                                |          |       |          |     |
| GO:0006614                                                   | 12                   | 105                                    | 1.42433965812439e-15 | 47.3349875930521 |                   | 0.370562590824164                                                   |          |       |          |     |
|                                                              |                      |                                        |                      |                  |                   | SRP-dependent cotranslational protein targeting to membrane         |          |       |          |     |
| GO:0006613                                                   | 12                   | 106                                    | 1.60214729655642e-15 | 46.8281505728314 |                   | 0.374091758355823                                                   |          |       |          |     |
|                                                              |                      |                                        |                      |                  |                   | cotranslational protein targeting to membrane                       |          |       |          |     |
| GO:0045047                                                   | 12                   | 106                                    | 1.60214729655642e-15 | 46.8281505728314 |                   | 0.374091758355823                                                   |          |       |          |     |
|                                                              |                      |                                        |                      |                  |                   | protein targeting to ER                                             |          |       |          |     |
| GO:0072599                                                   | 12                   | 106                                    | 1.60214729655642e-15 | 46.8281505728314 |                   | 0.374091758355823                                                   |          |       |          |     |
|                                                              |                      |                                        |                      |                  |                   | establishment of protein localization to endoplasmic reticulum      |          |       |          |     |
| GO:0070972                                                   | 12                   | 118                                    | 6.02682002649471e-15 | 41.4920174165457 |                   | 0.416441768735728                                                   |          |       |          |     |
|                                                              |                      |                                        |                      |                  |                   | protein localization to endoplasmic reticulum                       |          |       |          |     |
| GO:0006612                                                   | 12                   | 153                                    | 1.42762418440875e-13 | 31.1162029459902 |                   | 0.539962632343782                                                   |          |       |          |     |
|                                                              |                      |                                        |                      |                  |                   | protein targeting to membrane                                       |          |       |          |     |
| GO:0072594                                                   | 13                   | 204                                    | 1.79133086949973e-13 | 25.4501240011022 |                   | 0.719950176458377                                                   |          |       |          |     |
|                                                              |                      |                                        |                      |                  |                   | establishment of protein localization to organelle                  |          |       |          |     |
| GO:0006415                                                   | 10                   | 91                                     | 6.10276563851381e-13 | 43.1165311653117 |                   | 0.321154245380943                                                   |          |       |          |     |
|                                                              |                      |                                        |                      |                  |                   | translational termination                                           |          |       |          |     |
| GO:0022904                                                   | 9                    | 96                                     | 4.15506443813974e-11 | 35.2536945812808 |                   | 0.338800083039236                                                   |          |       |          |     |
|                                                              |                      |                                        |                      |                  |                   | respiratory electron transport chain                                |          |       |          |     |
| GO:0006414                                                   | 9                    | 105                                    | 9.4051309650409e-11  | 31.9285714285714 |                   | 0.370562590824164                                                   |          |       |          |     |
|                                                              |                      |                                        |                      |                  |                   | translational elongation                                            |          |       |          |     |
| GO:0019080                                                   | 151                  |                                        | 1.01777498621358e-10 | 24.665282823041  | 0.532904297280465 |                                                                     |          | 10    |          |     |
|                                                              |                      |                                        |                      |                  |                   | viral genome expression                                             |          |       |          |     |
| GO:0019083                                                   | 151                  |                                        | 1.01777498621358e-10 | 24.665282823041  | 0.532904297280465 |                                                                     |          | 10    |          |     |
|                                                              |                      |                                        |                      |                  |                   | viral transcription                                                 |          |       |          |     |
| GO:0043624                                                   | 10                   | 153                                    | 1.15959009805225e-10 | 24.3169026095855 |                   | 0.539962632343782                                                   |          |       |          |     |
|                                                              |                      |                                        |                      |                  |                   | cellular protein complex disassembly                                |          |       |          |     |
| GO:0043241                                                   | 10                   | 158                                    | 1.59415400058667e-10 | 23.4871456822676 |                   | 0.557608470002076                                                   |          |       |          |     |
|                                                              |                      |                                        |                      |                  |                   | protein complex disassembly                                         |          |       |          |     |
| GO:0000184                                                   | 9                    | 119                                    | 2.91777662601654e-10 | 27.8376623376623 |                   | 0.419970936267386                                                   |          |       |          |     |
|                                                              |                      |                                        |                      |                  |                   | nuclear-transcribed mRNA catabolic process, nonsense-mediated decay |          |       |          |     |
| GO:0000956                                                   | 10                   | 169                                    | 3.09584731097889e-10 | 21.8453750575242 |                   | 0.596429312850322                                                   |          |       |          |     |
|                                                              |                      |                                        |                      |                  |                   | nuclear-transcribed mRNA catabolic process                          |          |       |          |     |
| GO:0034623                                                   | 10                   | 174                                    | 4.12293794258691e-10 | 21.1719214753123 |                   | 0.614075150508615                                                   |          |       |          |     |
|                                                              |                      |                                        |                      |                  |                   | cellular macromolecular complex disassembly                         |          |       |          |     |
| GO:0006402                                                   | 10                   | 178                                    | 5.15243812730897e-10 | 20.6620209059233 |                   | 0.62819182063525                                                    |          |       |          |     |
|                                                              |                      |                                        |                      |                  |                   | mRNA catabolic process                                              |          |       |          |     |
| GO:0032984                                                   | 10                   | 179                                    | 5.44313297866754e-10 | 20.5383172174917 |                   | 0.631720988166909                                                   |          |       |          |     |
|                                                              |                      |                                        |                      |                  |                   | macromolecular complex disassembly                                  |          |       |          |     |
| GO:0022900                                                   | 9                    | 134                                    | 8.45924531024241e-10 | 24.4714285714286 |                   | 0.472908449242267                                                   |          |       |          |     |
|                                                              |                      |                                        |                      |                  |                   | electron transport chain                                            |          |       |          |     |
| GO:0045333                                                   | 9                    | 142                                    | 1.41805383370691e-09 | 22.9865735767991 |                   | 0.501141789495537                                                   |          |       |          |     |
|                                                              |                      |                                        |                      |                  |                   | cellular respiration                                                |          |       |          |     |
| GO:0006401                                                   | 10                   | 205                                    | 2.04070786799352e-09 | 17.7673545966229 |                   | 0.723479343990035                                                   |          |       |          |     |
|                                                              |                      |                                        |                      |                  |                   | RNA catabolic process                                               |          |       |          |     |
| GO:0006413                                                   | 9                    | 152                                    | 2.59291329191954e-09 | 21.3641358641359 |                   | 0.536433464812124                                                   |          |       |          |     |
|                                                              |                      |                                        |                      |                  |                   | translational initiation                                            |          |       |          |     |
| GO:0033365                                                   | 13                   | 473                                    | 6.42348114808723e-09 | 10.3672768878719 |                   | 1.66929624247457                                                    |          |       |          |     |
|                                                              |                      |                                        |                      |                  |                   | protein localization to organelle                                   |          |       |          |     |



Stable4\_20PerPair

|                                                                    |                      |                                                        |                    |       |                    |
|--------------------------------------------------------------------|----------------------|--------------------------------------------------------|--------------------|-------|--------------------|
| GO:0019058                                                         | 6.4563142589381e-09  | 15.6483831806644                                       | 0.815237699813162  |       |                    |
| 10                                                                 | 231                  | viral infectious cycle                                 |                    |       |                    |
| GO:0006605                                                         | 6.58809317519468e-09 | 10.3440461239868                                       | 1.67282541000623   |       |                    |
| 13                                                                 | 474                  | protein targeting                                      |                    |       |                    |
| GO:0022415                                                         | 1.99720989599994e-08 | 13.8048780487805                                       | 0.917583558231264  |       |                    |
| 10                                                                 | 260                  | viral reproductive process                             |                    |       |                    |
| GO:0071845                                                         | 4.60418442504915e-08 | 12.5743279330604                                       | 1.00228357899107   |       |                    |
| 10                                                                 | 284                  | cellular component disassembly at cellular level       |                    |       |                    |
| GO:0022411                                                         | 5.25208351095055e-08 | 12.3898929636778                                       | 1.01640024911771   |       |                    |
| 10                                                                 | 288                  | cellular component disassembly                         |                    |       |                    |
| GO:0015980                                                         | 9.56108317800119e-08 | 11.5816703621582                                       | 1.08345443221922   |       |                    |
| 10                                                                 | 307                  | energy derivation by oxidation of organic compounds    |                    |       |                    |
| GO:0016032                                                         | 3.73676437074146e-07 | 8.725                                                  | 1.59165455677808   | 11    | 451                |
| viral reproduction                                                 |                      |                                                        |                    |       |                    |
| GO:0006091                                                         | 2.01425804648476e-06 | 8.15847823550006                                       | 1.51048370354993   |       |                    |
| 10                                                                 | 428                  | generation of precursor metabolites and energy         |                    |       |                    |
| Tissue: Artery_Tibial=>Adipose_Subcutaneous Type: asymmetric       |                      |                                                        |                    |       |                    |
| SourceGene: NDUFB3(ENSG00000119013.4)                              |                      |                                                        |                    |       |                    |
| TargetGeneSet: RP11 RP1 NDUFS5 TPI1P1 RP4 PFN1P1 MIR4426 MRPS36P1  |                      |                                                        |                    |       |                    |
| RPL7AP11 RBBP4P1 CTD RPL24P4 COX7A2 NDUFA4 SEC61G ECD UQCRB        |                      |                                                        |                    |       |                    |
| COX6C ST13P5 NDUFS3 C11orf10 ATP5L RPS7P10 MRPL52 C14orf2 POLR3K   |                      |                                                        |                    |       |                    |
| NPRL3 NDUFAB1 PFN1 TXNDC17 ATP5G1 SNRPEP4 COX6B1 TMSB4XP6 ATP5J    |                      |                                                        |                    |       |                    |
| EEF1B2P3 COX7B RP3                                                 |                      |                                                        |                    |       |                    |
| GOBPID                                                             | Pvalue               | OddsRatio                                              | ExpCount           | Count | Size Term          |
| GO:0022904                                                         | 7.80090279040335e-19 | 154.679411764706                                       |                    |       | 0.152792194311812  |
| 11                                                                 | 96                   | respiratory electron transport chain                   |                    |       |                    |
| GO:0022900                                                         | 3.5316252424918e-17  | 106.609078590786                                       |                    |       | 0.213272437893571  |
| 11                                                                 | 134                  | electron transport chain                               |                    |       |                    |
| GO:0045333                                                         | 6.80627528109078e-17 | 100.04262086514                                        | 0.226005120752889  |       | 11                 |
| 142                                                                |                      | cellular respiration                                   |                    |       |                    |
| GO:0015980                                                         | 3.58734576149402e-13 | 43.7646396396396                                       |                    |       | 0.488616704726317  |
| 11                                                                 | 307                  | energy derivation by oxidation of organic compounds    |                    |       |                    |
| GO:0006091                                                         | 1.32945171280711e-11 | 30.7995603517186                                       |                    |       | 0.681198532973497  |
| 11                                                                 | 428                  | generation of precursor metabolites and energy         |                    |       |                    |
| GO:0042773                                                         | 9.41480564335991e-09 | 95.1455026455026                                       |                    |       | 0.0748045117984915 |
| 5                                                                  | 47                   | ATP synthesis coupled electron transport               |                    |       |                    |
| GO:0042775                                                         | 9.41480564335991e-09 | 95.1455026455026                                       |                    |       | 0.0748045117984915 |
| 5                                                                  | 47                   | mitochondrial ATP synthesis coupled electron transport |                    |       |                    |
| GO:0006119                                                         | 2.78034991876831e-08 | 75.3406708595388                                       |                    |       | 0.0923119507300533 |
| 5                                                                  | 58                   | oxidative phosphorylation                              |                    |       |                    |
| GO:0006120                                                         | 2.77656681191249e-07 | 94.7105263157895                                       |                    |       | 0.0572970728669296 |
| 4                                                                  | 36                   | mitochondrial electron transport, NADH to ubiquinone   |                    |       |                    |
| GO:0042776                                                         | 9.96830635216091e-07 | 216.27                                                 | 0.0206906096463913 | 3     | 13                 |
| mitochondrial ATP synthesis coupled proton transport               |                      |                                                        |                    |       |                    |
| GO:0015985                                                         | 2.82937347018751e-06 | 144.13                                                 | 0.0286485364334648 | 3     | 18                 |
| energy coupled proton transport, down electrochemical gradient     |                      |                                                        |                    |       |                    |
| GO:0015986                                                         | 2.82937347018751e-06 | 144.13                                                 | 0.0286485364334648 | 3     | 18                 |
| ATP synthesis coupled proton transport                             |                      |                                                        |                    |       |                    |
| Tissue: Artery_Tibial=>Adipose_Subcutaneous Type: asymmetric       |                      |                                                        |                    |       |                    |
| SourceGene: NDUFB7(ENSG00000099795.1)                              |                      |                                                        |                    |       |                    |
| TargetGeneSet: PARK7 RPL11 ZBTB80S RP4 NDUFS5 RPL5 ATP5F1 SIKE1    |                      |                                                        |                    |       |                    |
| MIR4426 SNRPE CHML ACP1 RPS7 CALM2 UBC C1D SNRPG FAM136A           |                      |                                                        |                    |       |                    |
| TPRKB TXNDC9 RPL31 MZT2B MTX2 MOB4 RPL32 LSM3 UBE2E1 DLEC1 RP11    |                      |                                                        |                    |       |                    |
| PCNP SNX4 COMMD2 PDCD10 DNAJC19 RPL35A COMMD8 UGT2B17 RPL34 AP1AR  |                      |                                                        |                    |       |                    |
| ANAPC10 NDUFS4 MRPS36 TAF9 BTF3 TBCA COX7C CETN3 CTD HINT1         |                      |                                                        |                    |       |                    |
| UBE2D2 RPS14 RPL26L1 NOL7 HMGN4 RPL39P3 COX7A2 RWDD1 MRPS12 NDUFA4 |                      |                                                        |                    |       |                    |
| GPR141 SEC61G ECD ACN9 NDUFA5 SSBP1 DCTN6 RPS20 SNHG6 UQCRB        |                      |                                                        |                    |       |                    |
| RPL30 COX6C POLR2K NDUFB9 SEC61B RPL35 COMMD3 ARHGAP12 RPL13AP5    |                      |                                                        |                    |       |                    |
| FAU TMEM126B ATP5L RPS25 PHB2 PFDN5 C12orf73 VPS29                 |                      |                                                        |                    |       |                    |
| ARL6IP4 RPS7P10 EIF4A1P7 HMGB1 MZT1 MRPL52 CGRRF1 ERH SLIRP        |                      |                                                        |                    |       |                    |
| C14orf2 ATPBD4 RPLP1 RPS17L HOMER2 SEC11A C16orf13 TCEB2 NDUFAB1   |                      |                                                        |                    |       |                    |
| SPAG7 TXNDC17 RPLP7 RPL17 RPL27 ATP5G1 STRA13 ZNF519 RPS15         |                      |                                                        |                    |       |                    |
| RPL36 PIN1 POLR2I RPS16 MEGF8 SNRPD2 RPL18 PFDN4 ATP5J SNRPD3      |                      |                                                        |                    |       |                    |

Stable4\_20PerPair

| POLR2F     | EEF1B2P3 | RBM3      | COX7B                | TCEAL4           | TCEAL3           | CXorf69                                                             |                    |
|------------|----------|-----------|----------------------|------------------|------------------|---------------------------------------------------------------------|--------------------|
| GOBPID     | Pvalue   | OddsRatio | ExpCount             | Count            | Size             | Term                                                                |                    |
| GO:0006614 | 26       | 105       | 1.28353323524086e-33 | 60.2025316455696 |                  | SRP-dependent cotranslational protein targeting to membrane         | 0.755657047955159  |
| GO:0006613 | 26       | 106       | 1.69178424414832e-33 | 59.4458333333333 |                  | cotranslational protein targeting to membrane                       | 0.762853781745208  |
| GO:0045047 | 26       | 106       | 1.69178424414832e-33 | 59.4458333333333 |                  | protein targeting to ER                                             | 0.762853781745208  |
| GO:0072599 | 26       | 106       | 1.69178424414832e-33 | 59.4458333333333 |                  | establishment of protein localization to endoplasmic reticulum      | 0.762853781745208  |
| GO:0070972 | 26       | 118       | 3.73538629239976e-32 | 51.6485507246377 |                  | protein localization to endoplasmic reticulum                       | 0.849214587225798  |
| GO:0019080 | 27       | 151       | 9.68825446215926e-31 | 40.2200460829493 |                  | viral genome expression                                             | 1.08670680229742   |
| GO:0019083 | 27       | 151       | 9.68825446215926e-31 | 40.2200460829493 |                  | viral transcription                                                 | 1.08670680229742   |
| GO:0006415 | 23       | 91        | 5.54551082225793e-30 | 59.6254538852578 |                  | translational termination                                           | 0.654902774894471  |
| GO:0006612 | 26       | 153       | 5.49561410491831e-29 | 37.3228346456693 |                  | protein targeting to membrane                                       | 1.10110026987752   |
| GO:0072594 | 28       | 204       | 1.6657132242262e-28  | 29.6641746411483 |                  | establishment of protein localization to organelle                  | 1.46813369317002   |
| GO:0006414 | 23       | 105       | 2.14506421732264e-28 | 49.3970189701897 |                  | translational elongation                                            | 0.755657047955159  |
| GO:0000184 | 23       | 119       | 4.91311555762776e-27 | 42.1518775720165 |                  | nuclear-transcribed mRNA catabolic process, nonsense-mediated decay | 0.856411321015847  |
| GO:0019058 | 27       | 231       | 1.5065378015306e-25  | 24.3099694423224 |                  | viral infectious cycle                                              | 1.66244550550135   |
| GO:0000956 | 169      |           | 8.3796949490573e-25  | 29.3834482758621 |                  | nuclear-transcribed mRNA catabolic process                          | 1.2162480105183 24 |
| GO:0006413 | 23       | 152       | 1.92604936992911e-24 | 31.2962005933582 |                  | translational initiation                                            | 1.09390353608747   |
| GO:0043624 | 23       | 153       | 2.2545261378898e-24  | 31.0532763532764 |                  | cellular protein complex disassembly                                | 1.10110026987752   |
| GO:0006402 | 24       | 178       | 3.03706954557625e-24 | 27.6487012987013 |                  | mRNA catabolic process                                              | 1.28101861462875   |
| GO:0022415 | 27       | 260       | 3.78675213310944e-24 | 21.2406220389053 |                  | viral reproductive process                                          | 1.87115078541277   |
| GO:0043241 | 23       | 158       | 4.87136289438155e-24 | 29.8926383173297 |                  | protein complex disassembly                                         | 1.13708393882776   |
| GO:0034623 | 23       | 174       | 4.82812957457821e-23 | 26.6951189600196 |                  | cellular macromolecular complex disassembly                         | 1.25223167946855   |
| GO:0032984 | 23       | 179       | 9.42424685329472e-23 | 25.8304051915163 |                  | macromolecular complex disassembly                                  | 1.28821534841879   |
| GO:0006401 | 24       | 205       | 9.72753108292477e-23 | 23.4795580110497 |                  | RNA catabolic process                                               | 1.47533042696007   |
| GO:0071845 | 24       | 284       | 2.36747278556812e-19 | 16.2542307692308 |                  | cellular component disassembly at cellular level                    | 2.04387239637395   |
| GO:0022411 | 24       | 288       | 3.28741623876774e-19 | 16.0034090909091 |                  | cellular component disassembly                                      | 2.07265933153415   |
| GO:0016032 | 451      |           | 6.07495664728637e-19 | 12.127410725395  | 3.24572693931216 | viral reproduction                                                  | 28                 |
| GO:0033365 | 28       | 473       | 2.13944444062467e-18 | 11.5096392667061 |                  | protein localization to organelle                                   | 3.40405508269324   |
| GO:0006605 | 28       | 474       | 2.26187252998951e-18 | 11.4830068444654 |                  | protein targeting                                                   | 3.41125181648329   |
| GO:0022904 | 15       | 96        | 2.05207720126966e-16 | 29.6837286724927 |                  | respiratory electron transport chain                                | 0.690886443844717  |
| GO:0022900 | 15       | 134       | 3.43762193935482e-14 | 20.1510716646209 |                  | electron transport chain                                            | 0.964362327866584  |
| GO:0045333 | 15       | 142       | 8.21109615471839e-14 | 18.8710961691586 |                  | cellular respiration                                                | 1.02193619818698   |
| GO:0022613 |          |           | 6.72834175581413e-11 | 11.3459069020867 |                  |                                                                     | 1.61926510276105   |

Stable4\_20PerPair

|                          |     |                                                                |                  |                    |
|--------------------------|-----|----------------------------------------------------------------|------------------|--------------------|
| 15                       | 225 | ribonucleoprotein complex biogenesis                           |                  |                    |
| GO:0071843               |     | 1.57751916069337e-10                                           | 10.6262540128411 | 1.72001937582174   |
| 15                       | 239 | cellular component biogenesis at cellular level                |                  |                    |
| GO:0015980               |     | 5.73780055812087e-10                                           | 8.78225554514214 | 2.20939727354508   |
| 16                       | 307 | energy derivation by oxidation of organic compounds            |                  |                    |
| GO:0042274               |     | 2.07863538610071e-09                                           | 73.1377551020408 | 0.129541208220884  |
| 6                        | 18  | ribosomal small subunit biogenesis                             |                  |                    |
| GO:0042776               |     | 2.15422177732748e-08                                           | 90.5239898989899 | 0.0935575392706387 |
| 5                        | 13  | mitochondrial ATP synthesis coupled proton transport           |                  |                    |
| GO:0042773               |     | 4.0483575735676e-08                                            | 25.8115979381443 | 0.338246488132309  |
| 7                        | 47  | ATP synthesis coupled electron transport                       |                  |                    |
| GO:0042775               |     | 4.0483575735676e-08                                            | 25.8115979381443 | 0.338246488132309  |
| 7                        | 47  | mitochondrial ATP synthesis coupled electron transport         |                  |                    |
| GO:0006364               |     | 5.6838232291922e-08                                            | 14.2125207756233 | 0.74846031416511   |
| 9                        | 104 | rRNA processing                                                |                  |                    |
| GO:0006091               |     | 6.45780521719966e-08                                           | 6.14960282436011 | 3.08020206214103   |
| 16                       | 428 | generation of precursor metabolites and energy                 |                  |                    |
| GO:0016072               |     | 9.26968797246056e-08                                           | 13.3625846795206 | 0.791640716905404  |
| 9                        | 110 | rRNA metabolic process                                         |                  |                    |
| GO:0042254               |     | 1.1436294305676e-07                                            | 10.8740241849074 | 1.07231333471732   |
| 10                       | 149 | ribosome biogenesis                                            |                  |                    |
| GO:0034660               |     | 1.2797969306365e-07                                            | 7.39233193277311 | 2.051069130164 13  |
| 285                      |     | ncRNA metabolic process                                        |                  |                    |
| GO:0015985               |     | 1.39369542087303e-07                                           | 55.6876456876457 | 0.129541208220884  |
| 5                        | 18  | energy coupled proton transport, down electrochemical gradient |                  |                    |
| GO:0015986               |     | 1.39369542087303e-07                                           | 55.6876456876457 | 0.129541208220884  |
| 5                        | 18  | ATP synthesis coupled proton transport                         |                  |                    |
| GO:0006119               |     | 1.81414863204859e-07                                           | 20.2288255508389 | 0.41741055982285   |
| 7                        | 58  | oxidative phosphorylation                                      |                  |                    |
| GO:0006120               |     | 1.96388879581855e-07                                           | 29.2183673469388 | 0.259082416441769  |
| 6                        | 36  | mitochondrial electron transport, NADH to ubiquinone           |                  |                    |
| GO:0022618               |     | 3.97268581095797e-07                                           | 13.6590038314176 | 0.683689710054667  |
| 8                        | 95  | ribonucleoprotein complex assembly                             |                  |                    |
| GO:0071826               |     | 5.90465807038686e-07                                           | 12.9121376811594 | 0.719673379004913  |
| 8                        | 100 | ribonucleoprotein complex subunit organization                 |                  |                    |
| GO:0000387               |     | 2.56590481848436e-06                                           | 27.8185703185703 | 0.223098747491523  |
| 5                        | 31  | spliceosomal snRNP assembly                                    |                  |                    |
| GO:0000028               |     | 7.12935624986512e-06                                           | 142.019801980198 | 0.0431804027402948 |
| 3                        | 6   | ribosomal small subunit assembly                               |                  |                    |
| GO:0015992               |     | 7.6944232837172e-06                                            | 14.5785714285714 | 0.474984430143243  |
| 6                        | 66  | proton transport                                               |                  |                    |
| GO:0006818               |     | 9.16205574648414e-06                                           | 14.1063199473338 | 0.489377897723341  |
| 6                        | 68  | hydrogen transport                                             |                  |                    |
| GO:0006839               |     | 9.78099672067121e-06                                           | 10.6015517058136 | 0.74846031416511   |
| 7                        | 104 | mitochondrial transport                                        |                  |                    |
| GO:0034470               |     | 1.37541921510622e-05                                           | 7.02143841278589 | 1.43934675800983   |
| 9                        | 200 | ncRNA processing                                               |                  |                    |
| GO:0000377               |     | 1.61104282598361e-05                                           | 6.87546558704453 | 1.46813369317002   |
| 9                        | 204 | RNA splicing, via transesterification reactions with bulged    |                  |                    |
| adenosine as nucleophile |     |                                                                |                  |                    |
| GO:0000398               |     | 1.61104282598361e-05                                           | 6.87546558704453 | 1.46813369317002   |
| 9                        | 204 | nuclear mRNA splicing, via spliceosome                         |                  |                    |
| GO:0000375               |     | 1.95323648034354e-05                                           | 6.70121052631579 | 1.50411736212027   |
| 9                        | 209 | RNA splicing, via transesterification reactions                |                  |                    |

Tissue: Adipose\_Subcutaneous=>Artery\_Tibial Type: asymmetric

SourceGene: NDUFS5(ENSG00000168653.6)

|                |           |        |       |         |        |         |          |                    |
|----------------|-----------|--------|-------|---------|--------|---------|----------|--------------------|
| TargetGeneSet: | AURKAIP1  | MRPL20 | PARK7 | MECR    | NDUFS5 | PPCS    | ERI3     |                    |
| UQCRH          | HBXIP     | ATP5F1 | SDHC  | TMCO1   | SNRPE  | C1orf31 | SLC4A1AP | COMMD1 MDH1        |
| SNRPG          | PRADC1    | TPRKB  | BOLA3 | FAM138B | TSN    | ATP5G3  | MTX2     | NDUFB3 AP1S3       |
| MYEOV2         | ARPC4     | LSM3   | CMC1  | CCDC72  | SPCS1  | ATG3    | RNF7     | MRPL47 NDUFB5      |
| MRPL1          | LAMTOR3   | SETP20 | LARP7 | EXOSC9  | NDUFC1 | SCOC    | LSM6     | PDCD6 NDUFS6       |
| C5orf44        | ANKRD32   | CAST   | GIN1  | MAN2A1  | HINT1  | UQCRQ   | PDF      | ATOX1 CTB          |
| EEF1E1         | HLA-F-AS1 |        | PFDN6 | HNRNPC  | MEAL1  | COX7A2  | COQ3     | RTN4IP1 SF3B5 LSM5 |

Stable4\_20PerPair

| GO ID      | Gene   | Gene      | Gene                 | Gene             | Gene | Gene                                                                                                | Gene | Gene | Gene | Gene | Term              |
|------------|--------|-----------|----------------------|------------------|------|-----------------------------------------------------------------------------------------------------|------|------|------|------|-------------------|
|            | Pvalue | OddsRatio | ExpCount             | Count            | Size | Term                                                                                                |      |      |      |      |                   |
| GO:0022904 | 27     | 96        | 3.18715826637257e-32 | 46.8118377785897 |      | respiratory electron transport chain                                                                |      |      |      |      | 0.969898276935852 |
| GO:0022900 | 28     | 134       | 2.10603152505072e-29 | 31.7854173329069 |      | electron transport chain                                                                            |      |      |      |      | 1.35381634488963  |
| GO:0045333 | 28     | 142       | 1.20422694257494e-28 | 29.5382099316087 |      | cellular respiration                                                                                |      |      |      |      | 1.43464120130095  |
| GO:0015980 | 29     | 307       | 2.98979089463873e-20 | 12.5063948840927 |      | energy derivation by oxidation of organic compounds                                                 |      |      |      |      | 3.10165386478444  |
| GO:0042773 | 14     | 47        | 1.57166228753119e-17 | 45.8696051423324 |      | ATP synthesis coupled electron transport                                                            |      |      |      |      | 0.474846031416511 |
| GO:0042775 | 14     | 47        | 1.57166228753119e-17 | 45.8696051423324 |      | mitochondrial ATP synthesis coupled electron transport                                              |      |      |      |      | 0.474846031416511 |
| GO:0006091 | 30     | 428       | 2.86164959095461e-17 | 9.03677872119217 |      | generation of precursor metabolites and energy                                                      |      |      |      |      | 4.32412981800567  |
| GO:0006119 | 14     | 58        | 4.24587644473892e-16 | 34.3756887052342 |      | oxidative phosphorylation                                                                           |      |      |      |      | 0.585980208982077 |
| GO:0006120 | 12     | 36        | 7.27037195699802e-16 | 53.2873134328358 |      | mitochondrial electron transport, NADH to ubiquinone                                                |      |      |      |      | 0.363711853850945 |
| GO:0015985 | 6      | 18        | 1.61144132962743e-08 | 51.0464285714286 |      | energy coupled proton transport, down electrochemical gradient                                      |      |      |      |      | 0.181855926925472 |
| GO:0015986 | 6      | 18        | 1.61144132962743e-08 | 51.0464285714286 |      | ATP synthesis coupled proton transport                                                              |      |      |      |      | 0.181855926925472 |
| GO:0000387 | 7      | 31        | 1.99629258587082e-08 | 29.9661270983213 |      | spliceosomal snRNP assembly                                                                         |      |      |      |      | 0.313196318593869 |
| GO:0042776 | 5      | 13        | 1.18505858352551e-07 | 63.3732269503546 |      | mitochondrial ATP synthesis coupled proton transport                                                |      |      |      |      | 0.131340391668397 |
| GO:0008380 | 16     | 323       | 1.68507574076243e-07 | 5.61182660987221 |      | RNA splicing                                                                                        |      |      |      |      | 3.26330357760709  |
| GO:0006397 | 17     | 399       | 5.73525880711992e-07 | 4.80317788871302 |      | mRNA processing                                                                                     |      |      |      |      | 4.03113971351464  |
| GO:0000375 | 12     | 209       | 1.37645706149734e-06 | 6.41321312220623 |      | RNA splicing, via transesterification reactions                                                     |      |      |      |      | 2.11154937374576  |
| GO:0015992 | 7      | 66        | 4.40188110241071e-06 | 12.1597366174857 |      | proton transport                                                                                    |      |      |      |      | 0.666805065393398 |
| GO:0008334 | 5      | 25        | 4.43650775997925e-06 | 25.3280141843972 |      | histone mRNA metabolic process                                                                      |      |      |      |      | 0.252577676285378 |
| GO:0006818 | 7      | 68        | 5.38804658805275e-06 | 11.7594055902819 |      | hydrogen transport                                                                                  |      |      |      |      | 0.687011279496229 |
| GO:0000291 | 5      | 26        | 5.44830224774408e-06 | 24.1202296521445 |      | nuclear-transcribed mRNA catabolic process, exonucleolytic                                          |      |      |      |      | 0.262680783336793 |
| GO:0043928 | 5      | 26        | 5.44830224774408e-06 | 24.1202296521445 |      | exonucleolytic nuclear-transcribed mRNA catabolic process involved in deadenylation-dependent decay |      |      |      |      | 0.262680783336793 |
| GO:0000377 | 11     | 204       | 7.03630480951238e-06 | 5.95785837651123 |      | RNA splicing, via transesterification reactions with bulged adenosine as nucleophile                |      |      |      |      | 2.06103383848869  |
| GO:0000398 | 11     | 204       | 7.03630480951238e-06 | 5.95785837651123 |      | nuclear mRNA splicing, via spliceosome                                                              |      |      |      |      | 2.06103383848869  |
| GO:0006754 | 6      | 49        | 9.38036671582839e-06 | 14.2146179401993 |      | ATP biosynthetic process                                                                            |      |      |      |      | 0.495052245519341 |

Stable4\_20PerPair

| GO:0006839                                  | 1.01830676064649e-05    | 8.58031400966184     | 1.05072313334717                               |                   |                                                                     |
|---------------------------------------------|-------------------------|----------------------|------------------------------------------------|-------------------|---------------------------------------------------------------------|
| 8 104                                       | mitochondrial transport |                      |                                                |                   |                                                                     |
| Tissue: Artery_Tibial=>Adipose_Subcutaneous | Type: asymmetric        |                      |                                                |                   |                                                                     |
| SourceGene:                                 | PIN1(ENSG00000127445.7) |                      |                                                |                   |                                                                     |
| TargetGeneSet:                              | RPL22                   | VPS13D               | RPL11 SYF2 PRDX3P2 KHDRBS1 RP4 RPS8 RPL5       |                   |                                                                     |
| RP11                                        | SNX7                    | ATP5F1               | SNRPE ZNF672 ACP1 YWHAQ TTC32 COX7A2L UBC      |                   |                                                                     |
| PPP3R1                                      | RPL31                   | MMADHC               | MTX2 KCTD18 RPL15 GORASP1 HIGD1A GRM2 PCNP     |                   |                                                                     |
| ITGB5-AS1                                   |                         | PDCD10               | PARL RPL35A OCIAD1 HSD17B11 RPL34 ANAPC10      |                   |                                                                     |
| RPS3A                                       | C4orf46                 | NDUFS4               | MRPS36 TAF9 FCHO2 BTF3 TBCA RPS23 CTD SNX2     |                   |                                                                     |
| UBE2D2                                      | NDFIP1                  | RPS14                | TDP2 RPS10 RPL10A C6orf130 RWDD1 MRPS12        |                   |                                                                     |
| C6orf72                                     | BTF3P10                 | NDUFA5               | SSBP1 DCTN6 RPL30 VPS13B POLR2K EIF3H CLTA     |                   |                                                                     |
| SLC35D2                                     | RPL35                   | RAB18                | VN1R53P AGAP6 VDAC2 RPS24 SFR1 RPL27A C11orf58 |                   |                                                                     |
| FAU                                         | RPS25                   | PFDN5                | YEATS4 C12orf45 MLXIP POLR1D DGKH TPT1         |                   |                                                                     |
| RSL24D1                                     | RPS3AP6                 | RAB11A               | MORF4L1 SEC11A SRRM2 VPS53 MINK1 GABARAP RPL19 |                   |                                                                     |
| RAPGEFL1                                    |                         | RPL27                | RNF213 FOXK2 PSMG2 RNF138 RPL17 ABCA7 RPS15    |                   |                                                                     |
| RPL36                                       | BRD4                    | RPL18                | ZNF667 SLC4A11 PFDN4 PI4KA MORC2 POLR2F KDM5C  |                   |                                                                     |
| HUWE1                                       | RPL10                   | VAMP7                |                                                |                   |                                                                     |
| GOBPID                                      | Pvalue                  | OddsRatio            | ExpCount Count Size Term                       |                   |                                                                     |
| GO:0006415                                  | 27 91                   | 1.82968058331037e-37 | 79.2902960526316                               | 0.648605632828178 | translational termination                                           |
| GO:0006614                                  | 28 105                  | 2.2625275620165e-37  | 69.1927272727273                               | 0.748391114801744 | SRP-dependent cotranslational protein targeting to membrane         |
| GO:0006613                                  | 28 106                  | 3.05920692959468e-37 | 68.3008547008547                               | 0.755518649228427 | cotranslational protein targeting to membrane                       |
| GO:0045047                                  | 28 106                  | 3.05920692959468e-37 | 68.3008547008547                               | 0.755518649228427 | protein targeting to ER                                             |
| GO:0072599                                  | 28 106                  | 3.05920692959468e-37 | 68.3008547008547                               | 0.755518649228427 | establishment of protein localization to endoplasmic reticulum      |
| GO:0070972                                  | 28 118                  | 8.96793570318084e-36 | 59.1442962962963                               | 0.841049062348626 | protein localization to endoplasmic reticulum                       |
| GO:0006414                                  | 27 105                  | 1.52646240815652e-35 | 64.9949392712551                               | 0.748391114801744 | translational elongation                                            |
| GO:0019080                                  | 29 151                  | 3.81709586088656e-34 | 45.6971643774922                               | 1.07625769842917  | viral genome expression                                             |
| GO:0019083                                  | 29 151                  | 3.81709586088656e-34 | 45.6971643774922                               | 1.07625769842917  | viral transcription                                                 |
| GO:0000184                                  | 27 119                  | 6.66852194647906e-34 | 55.0503432494279                               | 0.84817659677531  | nuclear-transcribed mRNA catabolic process, nonsense-mediated decay |
| GO:0006413                                  | 28 152                  | 2.08450014353447e-32 | 42.8249462365591                               | 1.08338523285586  | translational initiation                                            |
| GO:0006612                                  | 153                     | 2.53852081156221e-32 | 42.47936                                       | 1.09051276728254  | 28 protein targeting to membrane                                    |
| GO:0043624                                  | 27 153                  | 1.05713437487409e-30 | 40.0996240601504                               | 1.09051276728254  | cellular protein complex disassembly                                |
| GO:0043241                                  | 27 158                  | 2.665009726269e-30   | 38.5555443953395                               | 1.12615043941596  | protein complex disassembly                                         |
| GO:0072594                                  | 29 204                  | 3.94930482849469e-30 | 31.7387644787645                               | 1.45401702304339  | establishment of protein localization to organelle                  |
| GO:0000956                                  | 27 169                  | 1.82349348747595e-29 | 35.5413269088213                               | 1.20455331810947  | nuclear-transcribed mRNA catabolic process                          |
| GO:0034623                                  | 27 174                  | 4.17424947541628e-29 | 34.3203544575725                               | 1.24019099024289  | cellular macromolecular complex disassembly                         |
| GO:0006402                                  | 27 178                  | 7.94469852801563e-29 | 33.4017950505403                               | 1.26870112794962  | mRNA catabolic process                                              |
| GO:0032984                                  | 27 179                  | 9.30795624462891e-29 | 33.1797091412742                               | 1.27582866237631  | macromolecular complex disassembly                                  |
| GO:0019058                                  | 29 231                  | 1.63632534474771e-28 | 27.4440727856569                               | 1.64646045256384  | viral infectious cycle                                              |
| GO:0006401                                  | 27 205                  | 4.17105803182987e-27 | 28.2813424009462                               | 1.46114455747007  | RNA catabolic process                                               |
| GO:0022415                                  | 29 260                  | 5.39847106719936e-27 | 23.9495144495144                               | 1.85315895093765  | viral reproductive process                                          |
| GO:0071845                                  |                         | 3.08334812511755e-23 | 19.4786504198239                               | 2.02421977717805  |                                                                     |

Stable4\_20PerPair

|            |     |                                                  |                  |                                       |          |                  |                  |         |                    |       |        |                   |
|------------|-----|--------------------------------------------------|------------------|---------------------------------------|----------|------------------|------------------|---------|--------------------|-------|--------|-------------------|
| 27         | 284 | cellular component disassembly at cellular level |                  |                                       |          |                  |                  |         |                    |       |        |                   |
| GO:0022411 |     | 4.48730900500021e-23                             | 19.1746823956443 |                                       |          |                  |                  |         | 2.05272991488478   |       |        |                   |
| 27         | 288 | cellular component disassembly                   |                  |                                       |          |                  |                  |         |                    |       |        |                   |
| GO:0006605 |     | 8.29034726793334e-22                             | 13.5143905191874 |                                       |          |                  |                  |         | 3.37845131824787   |       |        |                   |
| 31         | 474 | protein targeting                                |                  |                                       |          |                  |                  |         |                    |       |        |                   |
| GO:0016032 |     | 2.66158111989196e-21                             | 13.5948329157583 |                                       |          |                  |                  |         | 3.21451802643416   |       |        |                   |
| 30         | 451 | viral reproduction                               |                  |                                       |          |                  |                  |         |                    |       |        |                   |
| GO:0033365 |     | 1.32816501122266e-19                             | 12.2722181641101 |                                       |          |                  |                  |         | 3.37132378382119   |       |        |                   |
| 29         | 473 | protein localization to organelle                |                  |                                       |          |                  |                  |         |                    |       |        |                   |
| GO:0042274 |     | 1.32769017726668e-07                             | 56.2598116169545 |                                       |          |                  |                  |         | 0.128295619680299  |       |        |                   |
| 5          | 18  | ribosomal small subunit biogenesis               |                  |                                       |          |                  |                  |         |                    |       |        |                   |
| GO:0022613 |     | 5.79743579126563e-07                             | 7.89689150751727 |                                       |          |                  |                  |         | 1.60369524600374   |       |        |                   |
| 11         | 225 | ribonucleoprotein complex biogenesis             |                  |                                       |          |                  |                  |         |                    |       |        |                   |
| GO:0071843 |     | 1.05259489543742e-06                             | 7.40465293668955 |                                       |          |                  |                  |         | 1.7034807279773 11 |       |        |                   |
| 239        |     | cellular component biogenesis at cellular level  |                  |                                       |          |                  |                  |         |                    |       |        |                   |
| GO:0042254 |     | 1.13787450749353e-06                             | 9.71671732522796 |                                       |          |                  |                  |         | 1.06200262957581   |       |        |                   |
| 9          | 149 | ribosome biogenesis                              |                  |                                       |          |                  |                  |         |                    |       |        |                   |
| GO:0006364 |     | 9.17638429143643e-06                             | 10.7127362542955 |                                       |          |                  |                  |         | 0.741263580375061  |       |        |                   |
| 7          | 104 | rRNA processing                                  |                  |                                       |          |                  |                  |         |                    |       |        |                   |
| GO:0030490 |     | 1.20555222457629e-05                             | 107.58           | 0.0498927409867829                    |          |                  | 3                |         | 7                  |       |        |                   |
|            |     | maturation of SSU-rRNA                           |                  |                                       |          |                  |                  |         |                    |       |        |                   |
| GO:0016072 |     | 1.32749181066227e-05                             | 10.0844457928803 |                                       |          |                  |                  |         | 0.78402878693516   |       |        |                   |
| 7          | 110 | rRNA metabolic process                           |                  |                                       |          |                  |                  |         |                    |       |        |                   |
|            |     | Tissue: Artery_Tibial=>Adipose_Subcutaneous      |                  |                                       |          |                  |                  |         |                    |       |        |                   |
|            |     | Type: asymmetric                                 |                  |                                       |          |                  |                  |         |                    |       |        |                   |
|            |     | SourceGene: PPP1R35(ENSG00000160813.2)           |                  |                                       |          |                  |                  |         |                    |       |        |                   |
|            |     | TargetGeneSet:                                   | IL28RA           | RAB42                                 | CTSS     | C1orf85          | SLAMF9           | CD84    | NUF2               | ASPM  | NEK2   |                   |
|            |     | ZNF692                                           | GCC2             | BUB1                                  | HJURP    | FANCD2           | SGOL1            | HEMK1   | RP11               | SKIL  | NCEH1  | PARL              |
|            |     | CTBP1                                            | CENPE            | MAD2L1                                | NEK1     | HEXB             | KCNN2            | KIF20A  | GM2A               | RGL2  | TREML4 |                   |
|            |     | PLA2G7                                           | IMPG1            | NDUF4F4                               | HSF2     | BLVRA            | CHMP7            | DNAJC5B | SCRIB              | MELK  | FBP1   |                   |
|            |     | IKBKAP                                           | DAB2IP           | ZNF248                                | CEP55    | CTBP2            | MKI67            | DDB2    | RBM14              | MPP2  | TCTN2  |                   |
|            |     | SLC7A8                                           | DLGAP5           | NPC2                                  | BUB1B    | CASC5            | NUSAP1           | CCNB2   | APH1B              | PRC1  | ADCY9  |                   |
|            |     | GLIS2                                            | ASPHD1           | ORAI3                                 | ORC6     | ELMO3            | DPEP2            | CDT1    | AURKB              | EVI2B | CCT6B  |                   |
|            |     | TOP2A                                            | KIF18B           | ORICH2                                | BIRC5    | RP13             | PSTPIP2          | SKA1    | MUM1               | ACP5  | ASF1B  | TPX2              |
|            |     | MYBL2                                            | UBE2C            | C21orf59                              |          | SOWAHD           |                  |         |                    |       |        |                   |
|            |     | GOBPID                                           | Pvalue           | OddsRatio                             | ExpCount | Count            | Size             | Term    |                    |       |        |                   |
|            |     | GO:0000087                                       |                  | 8.11545192707253e-18                  |          | 16.610650887574  | 1.91820635250156 |         |                    |       |        | 22                |
|            |     | 360                                              |                  | M phase of mitotic cell cycle         |          |                  |                  |         |                    |       |        |                   |
|            |     | GO:0000280                                       |                  | 7.48784246976667e-17                  |          | 16.0087386018237 |                  |         |                    |       |        | 1.86492284270985  |
|            |     | 21                                               |                  | 350 nuclear division                  |          |                  |                  |         |                    |       |        |                   |
|            |     | GO:0007067                                       |                  | 7.48784246976667e-17                  |          | 16.0087386018237 |                  |         |                    |       |        | 1.86492284270985  |
|            |     | 21                                               |                  | 350 mitosis                           |          |                  |                  |         |                    |       |        |                   |
|            |     | GO:0048285                                       |                  | 2.30635355685262e-16                  |          | 15.0698424068768 |                  |         |                    |       |        | 1.97148986229327  |
|            |     | 21                                               |                  | 370 organelle fission                 |          |                  |                  |         |                    |       |        |                   |
|            |     | GO:0051301                                       |                  | 9.84499542895747e-16                  |          | 12.9711627906977 |                  |         |                    |       |        | 2.40841464258529  |
|            |     | 22                                               |                  | 452 cell division                     |          |                  |                  |         |                    |       |        |                   |
|            |     | GO:0007059                                       |                  | 1.65357408919032e-14                  |          | 25.1287477954145 |                  |         |                    |       |        | 0.745969137083939 |
|            |     | 14                                               |                  | 140 chromosome segregation            |          |                  |                  |         |                    |       |        |                   |
|            |     | GO:0000236                                       |                  | 2.29063332390665e-11                  |          | 28.4557213930348 |                  |         |                    |       |        | 0.452909833229534 |
|            |     | 10                                               |                  | 85 mitotic prometaphase               |          |                  |                  |         |                    |       |        |                   |
|            |     | GO:0007017                                       |                  | 1.98673818066692e-10                  |          | 9.7383136930904  | 2.0940419348142  | 16      |                    |       |        | 393               |
|            |     |                                                  |                  | microtubule-based process             |          |                  |                  |         |                    |       |        |                   |
|            |     | GO:0010564                                       |                  | 4.26290201811313e-10                  |          | 9.21064338083862 |                  |         |                    |       |        | 2.20593730537679  |
|            |     | 16                                               |                  | 414 regulation of cell cycle process  |          |                  |                  |         |                    |       |        |                   |
|            |     | GO:0000226                                       |                  | 1.53348202076876e-09                  |          | 11.2020263671875 |                  |         |                    |       |        | 1.433326413397 13 |
|            |     | 269                                              |                  | microtubule cytoskeleton organization |          |                  |                  |         |                    |       |        |                   |
|            |     | GO:0007346                                       |                  | 6.32103781543842e-08                  |          | 8.93449643140365 |                  |         |                    |       |        | 1.61449034668881  |
|            |     | 12                                               |                  | 303 regulation of mitotic cell cycle  |          |                  |                  |         |                    |       |        |                   |
|            |     | GO:0031577                                       |                  | 8.45574181198128e-08                  |          | 33.6572769953052 |                  |         |                    |       |        | 0.223790741125182 |
|            |     | 6                                                |                  | 42 spindle checkpoint                 |          |                  |                  |         |                    |       |        |                   |
|            |     | GO:0071156                                       |                  | 1.41374166330406e-07                  |          | 9.30237154150198 |                  |         |                    |       |        | 1.40668465850114  |
|            |     | 11                                               |                  | 264 regulation of cell cycle arrest   |          |                  |                  |         |                    |       |        |                   |
|            |     | GO:0007051                                       |                  | 2.14855989955282e-07                  |          | 19.5904109589041 |                  |         |                    |       |        | 0.426268078333679 |
|            |     | 7                                                |                  | 80 spindle organization               |          |                  |                  |         |                    |       |        |                   |

Stable4\_20PerPair

|                                                  |                                                                     |                  |                        |
|--------------------------------------------------|---------------------------------------------------------------------|------------------|------------------------|
| GO:0000819                                       | 3.14610820744488e-07                                                | 26.3221065523576 | 0.277074250916892      |
| 6 52                                             | sister chromatid segregation                                        |                  |                        |
| GO:0007088                                       | 4.15025086482453e-07                                                | 17.6456790123457 | 0.468894886167047      |
| 7 88                                             | regulation of mitosis                                               |                  |                        |
| GO:0051783                                       | 4.15025086482453e-07                                                | 17.6456790123457 | 0.468894886167047      |
| 7 88                                             | regulation of nuclear division                                      |                  |                        |
| GO:0045786                                       | 4.67338759798248e-07                                                | 6.68300412735849 | 2.32848937789772       |
| 13 437                                           | negative regulation of cell cycle                                   |                  |                        |
| GO:0007050                                       | 5.30062805352234e-07                                                | 7.2486102133161  | 1.9661615113141 12 369 |
| cell cycle arrest                                |                                                                     |                  |                        |
| GO:0000075                                       | 5.91210608297621e-07                                                | 9.09804426145136 | 1.28946093695938       |
| 10 242                                           | cell cycle checkpoint                                               |                  |                        |
| GO:0071173                                       | 9.28542025236463e-07                                                | 34.3510536398467 | 0.181163933291814      |
| 5 34                                             | spindle assembly checkpoint                                         |                  |                        |
| GO:0034453                                       | 1.07880770747736e-06                                                | 33.2037037037037 | 0.186492284270985      |
| 5 35                                             | microtubule anchoring                                               |                  |                        |
| GO:0008608                                       | 1.68232414067792e-06                                                | 60.5310853530032 | 0.0905819666459069     |
| 4 17                                             | attachment of spindle microtubules to kinetochore                   |                  |                        |
| GO:0051313                                       | 2.71771295428337e-06                                                | 52.4529680365297 | 0.101238668604249      |
| 4 19                                             | attachment of spindle microtubules to chromosome                    |                  |                        |
| GO:0030071                                       | 3.09433502478164e-06                                                | 26.1988304093567 | 0.229119092104353      |
| 5 43                                             | regulation of mitotic metaphase/anaphase transition                 |                  |                        |
| GO:0007091                                       | 3.89494661238576e-06                                                | 24.8854166666667 | 0.239775794062695      |
| 5 45                                             | mitotic metaphase/anaphase transition                               |                  |                        |
| GO:0000070                                       | 5.9790036781241e-06                                                 | 22.6167929292929 | 0.261089197979379      |
| 5 49                                             | mitotic sister chromatid segregation                                |                  |                        |
| GO:0000910                                       | 1.05418242064569e-05                                                | 13.7189500640205 | 0.500864992042073      |
| 6 94                                             | cytokinesis                                                         |                  |                        |
| GO:0000086                                       | 1.1323242897632e-05                                                 | 10.3919708029197 | 0.767282541000623      |
| 7 144                                            | G2/M transition of mitotic cell cycle                               |                  |                        |
| Tissue: Artery_Tibial=>Adipose_Subcutaneous      | Type: asymmetric                                                    |                  |                        |
| SourceGene:                                      | RP11-122C5.1(ENSG00000249911.1)                                     |                  |                        |
| TargetGeneSet:                                   | RP11 RPL32 RPL15 RPL34 NKD2 BTF3 CTB RPS14                          |                  |                        |
| C6orf130                                         | ARF5 RPL30 RPS6 ANP32B HIF1AN UBXN1 RPS25 PFDN5                     |                  |                        |
| RPL41 RPL31P52                                   | TPT1 RPL36A SEC11A RPS15A CTD RPL26 RPL17                           |                  |                        |
| RPL19 MSI2 NFIC RPL36 CCDC106 RPS4X APOOL RPL10  |                                                                     |                  |                        |
| GOBPID Pvalue OddsRatio ExpCount Count Size Term |                                                                     |                  |                        |
| GO:0006614                                       | 1.14896144109454e-27                                                | 198.209161624892 | 0.210712061449035      |
| 16 105                                           | SRP-dependent cotranslational protein targeting to membrane         |                  |                        |
| GO:0006613                                       | 1.35206783370638e-27                                                | 195.993162393162 | 0.212718842986645      |
| 16 106                                           | cotranslational protein targeting to membrane                       |                  |                        |
| GO:0045047                                       | 1.35206783370638e-27                                                | 195.993162393162 | 0.212718842986645      |
| 16 106                                           | protein targeting to ER                                             |                  |                        |
| GO:0072599                                       | 1.35206783370638e-27                                                | 195.993162393162 | 0.212718842986645      |
| 16 106                                           | establishment of protein localization to endoplasmic reticulum      |                  |                        |
| GO:0070972                                       | 8.45158216386469e-27                                                | 172.790346907994 | 0.236800221437963      |
| 16 118                                           | protein localization to endoplasmic reticulum                       |                  |                        |
| GO:0006415                                       | 2.08823149905626e-26                                                | 202.246240601504 | 0.182617119922497      |
| 15 91                                            | translational termination                                           |                  |                        |
| GO:0006414                                       | 2.09274983470356e-25                                                | 170.619047619048 | 0.210712061449035      |
| 15 105                                           | translational elongation                                            |                  |                        |
| GO:0006612                                       | 6.73796736003385e-25                                                | 128.332397529478 | 0.307037575254308      |
| 16 153                                           | protein targeting to membrane                                       |                  |                        |
| GO:0000184                                       | 1.53646023528533e-24                                                | 147.506868131868 | 0.238807002975573      |
| 15 119                                           | nuclear-transcribed mRNA catabolic process, nonsense-mediated decay |                  |                        |
| GO:0019080                                       | 6.49938859362646e-23                                                | 112.547268907563 | 0.303024012179088      |
| 15 151                                           | viral genome expression                                             |                  |                        |
| GO:0019083                                       | 6.49938859362646e-23                                                | 112.547268907563 | 0.303024012179088      |
| 15 151                                           | viral transcription                                                 |                  |                        |
| GO:0006413                                       | 7.20438898109483e-23                                                | 111.717935349322 | 0.305030793716698      |
| 15 152                                           | translational initiation                                            |                  |                        |
| GO:0072594                                       | 7.92730701992663e-23                                                | 93.1849427168576 | 0.40938343367241       |
| 16 204                                           | establishment of protein localization to organelle                  |                  |                        |

Stable4\_20PerPair

|                 |                                                      |                                                        |                      |
|-----------------|------------------------------------------------------|--------------------------------------------------------|----------------------|
| GO:0043624      | 7.98015086234435e-23                                 | 110.900621118012                                       | 0.307037575254308    |
| 15              | 153                                                  | cellular protein complex disassembly                   |                      |
| GO:0043241      | 1.31694056865968e-22                                 | 106.985514485514                                       | 0.317071482942357    |
| 15              | 158                                                  | protein complex disassembly                            |                      |
| GO:0000956      | 3.74629653040939e-22                                 | 99.2671614100186                                       | 0.339146079856065    |
| 15              | 169                                                  | nuclear-transcribed mRNA catabolic process             |                      |
| GO:0034623      | 5.88527129669815e-22                                 | 96.1118598382749                                       | 0.349179987544115    |
| 15              | 174                                                  | cellular macromolecular complex disassembly            |                      |
| GO:0006402      | 8.36500265154566e-22                                 | 93.7269938650307                                       | 0.357207113694554    |
| 15              | 178                                                  | mRNA catabolic process                                 |                      |
| GO:0032984      | 9.12170926387528e-22                                 | 93.1489547038328                                       | 0.359213895232164    |
| 15              | 179                                                  | macromolecular complex disassembly                     |                      |
| GO:0006401      | 7.3662835824345e-21                                  | 80.2556390977444                                       | 0.41139021521002     |
| 15              | 205                                                  | RNA catabolic process                                  |                      |
| GO:0019058      | 4.58067706336739e-20                                 | 70.4662698412698                                       | 0.463566535187876    |
| 15              | 231                                                  | viral infectious cycle                                 |                      |
| GO:0022415      | 2.77114154915799e-19                                 | 61.9985422740525                                       | 0.521763199778562    |
| 15              | 260                                                  | viral reproductive process                             |                      |
| GO:0071845      | 1.0557766715806e-18                                  | 56.3714816781731                                       | 0.569925956681198    |
| 15              | 284                                                  | cellular component disassembly at cellular level       |                      |
| GO:0022411      | 1.30432507449168e-18                                 | 55.5298273155416                                       | 0.577953082831638    |
| 15              | 288                                                  | cellular component disassembly                         |                      |
| GO:0033365      | 6.20173941789631e-17                                 | 37.6098299949503                                       | 0.949207667289461    |
| 16              | 473                                                  | protein localization to organelle                      |                      |
| GO:0006605      | 6.41279420733435e-17                                 | 37.5250251931475                                       | 0.951214448827071    |
| 16              | 474                                                  | protein targeting                                      |                      |
| GO:0016032      | 1.07194567004352e-15                                 | 34.3692660550459                                       | 0.905058473462044    |
| 15              | 451                                                  | viral reproduction                                     |                      |
| GO:0000028      | 1.44739365195045e-07                                 | 554.576923076923                                       | 0.0120406892256591   |
| 3               | 6                                                    | ribosomal small subunit assembly                       |                      |
| GO:0042255      | 3.99834937900122e-06                                 | 127.890532544379                                       | 0.0321085046017577   |
| 3               | 16                                                   | ribosome assembly                                      |                      |
| GO:0042274      | 5.81045750171972e-06                                 | 110.823076923077                                       | 0.0361220676769774   |
| 3               | 18                                                   | ribosomal small subunit biogenesis                     |                      |
| Tissue: Adipose | Subcutaneous=>Artery_Tibial                          | Type: asymmetric                                       |                      |
| SourceGene:     | RP11-40H20.1(ENSG00000214973.3)                      |                                                        |                      |
| TargetGeneSet:  | ATPIF1 PPCS Clorf50 BTBD19 UQCRH TMEM167B RP11       |                                                        |                      |
| TRIB2 TPRKB     | MRPS9 NDUFB3 DZIP1L IGSF10 NDUFB5 FGFR1 THEGL NDUFC1 |                                                        |                      |
| NDUFS6 ISCA1P1  | COX7C HINT1 COX7A2 SLC22A2 STAG3L1 PMS2P1 FAM160B2   |                                                        |                      |
| RPL10AP2        | DECR1 C9orf123 NUDT2 FAM27E1 PSMB7 ATP5C1 NDUFB8     |                                                        |                      |
| USMG5 NAV2      | NDUFS3 EML3 NEAT1 C11orf51 CCDC90B ATP5L NDUFA9      |                                                        |                      |
| MRPL51 FAM90A1  | C12orf39 NDUFA12 RPS7P10 ZBTB25 COX16 SLIRP NDUFB1   |                                                        |                      |
| C14orf2 CTD     | MYEF2 GTF2A2 POLR3K PKD1P6 PSMB10 C17orf89 NPC1      |                                                        |                      |
| UQCR11 PIN1     | ATP5J RPL12P9 ATP50 POLR2F COX7B NDUFA1              |                                                        |                      |
| GOBPID Pvalue   | OddsRatio                                            | ExpCount                                               | Count Size Term      |
| GO:0022904      | 2.86037904656724e-28                                 | 118.07967032967                                        | 0.305584388623625 18 |
| 96              |                                                      | respiratory electron transport chain                   |                      |
| GO:0022900      | 1.78822752289842e-25                                 | 79.1878078817734                                       | 0.426544875787143    |
| 18              | 134                                                  | electron transport chain                               |                      |
| GO:0045333      | 5.36833090300841e-25                                 | 74.0374423963134                                       | 0.452010241505778    |
| 18              | 142                                                  | cellular respiration                                   |                      |
| GO:0015980      | 7.78780791892873e-19                                 | 31.3999011369254                                       | 0.977233409452633    |
| 18              | 307                                                  | energy derivation by oxidation of organic compounds    |                      |
| GO:0006091      | 1.22161031685955e-17                                 | 24.0807751516798                                       | 1.36239706594699     |
| 19              | 428                                                  | generation of precursor metabolites and energy         |                      |
| GO:0006119      | 1.90989284439664e-17                                 | 96.0109422492401                                       | 0.184623901460107    |
| 11              | 58                                                   | oxidative phosphorylation                              |                      |
| GO:0042773      | 1.77864292754985e-16                                 | 107.867867867868                                       | 0.149609023596983    |
| 10              | 47                                                   | ATP synthesis coupled electron transport               |                      |
| GO:0042775      | 1.77864292754985e-16                                 | 107.867867867868                                       | 0.149609023596983    |
| 10              | 47                                                   | mitochondrial ATP synthesis coupled electron transport |                      |
| GO:0006120      | 1.2898541533863e-15                                  | 129.531531531532                                       | 0.114594145733859    |
| 9               | 36                                                   | mitochondrial electron transport, NADH to ubiquinone   |                      |



Stable4\_20PerPair

|                |                                                                |                                                                |                                        |
|----------------|----------------------------------------------------------------|----------------------------------------------------------------|----------------------------------------|
| GO:0042776     | 6.2905206281311e-08                                            | 152.338624338624                                               | 0.0413812192927825                     |
| 4              | 13                                                             | mitochondrial ATP synthesis coupled proton transport           |                                        |
| GO:0015985     | 2.66101931278596e-07                                           | 97.8979591836735                                               | 0.0572970728669296                     |
| 4              | 18                                                             | energy coupled proton transport, down electrochemical gradient |                                        |
| GO:0015986     | 2.66101931278596e-07                                           | 97.8979591836735                                               | 0.0572970728669296                     |
| 4              | 18                                                             | ATP synthesis coupled proton transport                         |                                        |
| GO:0006200     | 3.81956829649728e-06                                           | 24.9738675958188                                               | 0.238737803612207                      |
| 5              | 75                                                             | ATP catabolic process                                          |                                        |
| GO:0006754     | 1.71434037712978e-05                                           | 30.3915343915344                                               | 0.155975365026642                      |
| 4              | 49                                                             | ATP biosynthetic process                                       |                                        |
| Tissue:        | Adipose_Subcutaneous=>Artery_Tibial                            | Type:                                                          | cluster                                |
| SourceGene:    | RPS7P10(ENSG00000226525.3)                                     |                                                                |                                        |
| TargetGeneSet: | AURKAIP1                                                       | MRPL20                                                         | FAM213B PARK7 CELA2B PLEKHM2 RP11 UBR4 |
| MINOS1         | SDHDP1 RP1 ATPIF1 7SK PSMB2 RP3 C1orf122 PPCS                  |                                                                |                                        |
| UQCRH          | HBXIP ATP5F1 S100A6 CRT2 LAMTOR2 SDHC TMC01 PFN1P1 MIR4426     |                                                                |                                        |
| SNRPE          | MORF4L1P1 C1orf31 SCCPDH ITGB1BP1 OST4 C2orf28 FTH1P3          |                                                                |                                        |
| CALM2          | MDH1 SNRPG TPRKB BOLA3 SUCLG1 COX5B TXNDC9 TSPO SCRNB          |                                                                |                                        |
| ATP5G3         | MTX2 NIF3L1 NDUFB3 MYEOV2 PPP1R7 LSM3 SPCS1 PDHB ATG3          |                                                                |                                        |
| NDUFB4         | MRPS22 RNF7 UBE2V1P2 MRPL47 MCCC1 NCBP2 CPZ COMMD8             |                                                                |                                        |
| MRPL1          | ENOPH1 MRPS18C PPA2 NUDT6 NDUFC1 SCOC LSM6 C4orf27 PDCD6       |                                                                |                                        |
| NDUFS6         | RBBP4P1 MOCS2 C5orf43 ISCA1P1 COX7C CTD CETN3 HINT1 FNIP1      |                                                                |                                        |
| UQCRQ          | PDF ARHGAP26 ATOX1 PPP1R2P3 RPL26L1 HIGD2A NHP2 LSM2           |                                                                |                                        |
| PFDN6          | HNRNPC COX6A1P2 RPL24P4 MEA1 C6orf108 COX7A2 COQ3              |                                                                |                                        |
| FOXO3          | MRPS12 SF3B5 MRPL18 NDUFA4 ANKMY2 LSM5 SEPT7 YAE1D1 PPIA       |                                                                |                                        |
| SEC61G         | MDH2 TP53TG1 CDK6 ACN9 COPS6 PMS2P1 LRRN4 BPGM JHDM1D          |                                                                |                                        |
| NDUFB2         | SSBP1 DEFA3 CCDC25 LSM1 RPL10AP2 MRPS35 DECR1 COX6C            |                                                                |                                        |
| MRPL13         | NDUFB9 C9orf46 SNRPEP2 C9orf123 PLIN2 NDUFB6 YBX1P10 RPS10P3   |                                                                |                                        |
| SEC61B         | ATP5C1 CDC123 YWHAZP3 KIAA0913 SRP9P1 NDUFB8 USMG5 TCF7L2 UROS |                                                                |                                        |
| ECHS1          | POLR2L MRPL23 ST13P5 IMMP1L NDUFS3 C11orf10 CFL1 MRPL11        |                                                                |                                        |
| PPP1CA         | MRPL21 C11orf51 CLNS1A CCDC90B TMEM126A SDHD ATP5L MLL         |                                                                |                                        |
| DCPS           | DYRK4 COPS7A COX14 MYL6 NDUFA12 SNRPF CCDC53 NUP37 C12orf45    |                                                                |                                        |
| MED13L         | COX6A1 TRIAP1 POP5 DENR ULK1 FAM207BP RPS7P10 N4BP2L2-IT1      |                                                                |                                        |
| DGKH           | MED4 COX7CP1 MRPL52 MYH6 RPS29 COX16 SLIRP NDUFB1 SLC25A29     |                                                                |                                        |
| C14orf2        | TMEM85 GTF2A2 RAB11A COX5A WDR61 RPS17L MRPS11 U6 MRPL28       |                                                                |                                        |
| MAPK8IP3       | NDUFB10 NPIPP1 PKD1P6 NDUFAB1 ATXN2L NUTF2 PSMB10 HSBP1        |                                                                |                                        |
| PSMB6          | TXNDC17 LSMD1 C17orf75 PSMB3 G6PC3 GPATCH8 PLEKHM1 ATP5G1 PHB  |                                                                |                                        |
| RAD51C         | ICT1 C17orf89 ANAPC11 EPG5 ATP5A1 IER3IP1 UQCR11 C19orf70      |                                                                |                                        |
| INSR           | C19orf79 NDUFA7 PIN1 ZNF791 WDR830S NDUFB7 AKAP8L NDUFA13 POP4 |                                                                |                                        |
| COX6B1         | PSENE1 TBCB CYP2G1P NDUFA3 TBC1D20 SNRPB2 NAA20 ROMO1 ATP5E    |                                                                |                                        |
| PPIAP22        | ATP5J ATP50 SNRPD3 MTMR3 SLC5A1 POLR2F GTPBP1 NDUFA6 TTLL1 RP6 |                                                                |                                        |
| GS1            | EEF1B2P3 GAPDHP1 RPS2P55 RP13 PDZD11 ITGB1BP2 COX7B            |                                                                |                                        |
| PSMD10         | NXT2 NDUFA1 FTH1P8 CETN2 PSMA6P1                               |                                                                |                                        |
| GOBPID         | Pvalue                                                         | OddsRatio                                                      | ExpCount                               |
| GO:0022904     | 2.28900664353924e-48                                           | 57.2154963680387                                               | 1.44156113763753                       |
| 40             | 96                                                             | respiratory electron transport chain                           |                                        |
| GO:0045333     | 1.95163034183628e-46                                           | 36.6865636427982                                               | 2.13230918275552                       |
| 44             | 142                                                            | cellular respiration                                           |                                        |
| GO:0022900     | 1.89851180194962e-41                                           | 33.9944704892415                                               | 2.01217908795239                       |
| 40             | 134                                                            | electron transport chain                                       |                                        |
| GO:0015980     | 2.28260667625191e-35                                           | 15.3252153252153                                               | 4.60999238807003                       |
| 48             | 307                                                            | energy derivation by oxidation of organic compounds            |                                        |
| GO:0006091     | 1.25140480086024e-30                                           | 10.9748756455343                                               | 6.42696007196734                       |
| 50             | 428                                                            | generation of precursor metabolites and energy                 |                                        |
| GO:0042773     | 9.56750064780683e-25                                           | 53.4198157548411                                               | 0.705764306968376                      |
| 20             | 47                                                             | ATP synthesis coupled electron transport                       |                                        |
| GO:0042775     | 9.56750064780683e-25                                           | 53.4198157548411                                               | 0.705764306968376                      |
| 20             | 47                                                             | mitochondrial ATP synthesis coupled electron transport         |                                        |
| GO:0006119     | 3.92800276161135e-24                                           | 41.1110038610039                                               | 0.870943187322677                      |
| 21             | 58                                                             | oxidative phosphorylation                                      |                                        |
| GO:0006120     | 5.28408124888484e-24                                           | 71.4371859296482                                               | 0.540585426614075                      |
| 18             | 36                                                             | mitochondrial electron transport, NADH to ubiquinone           |                                        |
| GO:0015985     | 1.42221004526642e-12                                           | 68.3894230769231                                               | 0.270292713307038                      |
| 9              | 18                                                             | energy coupled proton transport, down electrochemical gradient |                                        |

Stable4\_20PerPair

|            |                                                                                                     |                  |                     |
|------------|-----------------------------------------------------------------------------------------------------|------------------|---------------------|
| GO:0015986 | 1.42221004526642e-12                                                                                | 68.3894230769231 | 0.270292713307038   |
| 9 18       | ATP synthesis coupled proton transport                                                              |                  |                     |
| GO:0042776 | 2.74228857669388e-12                                                                                | 108.93014354067  | 0.195211404055083 8 |
| 13         | mitochondrial ATP synthesis coupled proton transport                                                |                  |                     |
| GO:0006754 | 4.01334088685586e-08                                                                                | 15.3540865384615 | 0.735796830669158   |
| 9 49       | ATP biosynthetic process                                                                            |                  |                     |
| GO:0015992 | 4.80013218877625e-08                                                                                | 12.2308488612836 | 0.991073282125804   |
| 10 66      | proton transport                                                                                    |                  |                     |
| GO:0006818 | 6.44429769370182e-08                                                                                | 11.8074296185241 | 1.02110580582659    |
| 10 68      | hydrogen transport                                                                                  |                  |                     |
| GO:0000375 | 1.04999803973142e-07                                                                                | 5.79114788750548 | 3.13839872673171    |
| 16 209     | RNA splicing, via transesterification reactions                                                     |                  |                     |
| GO:0009206 | 2.50301770650288e-07                                                                                | 12.0330882352941 | 0.900975711023459   |
| 9 60       | purine ribonucleoside triphosphate biosynthetic process                                             |                  |                     |
| GO:0009145 | 2.89832274965178e-07                                                                                | 11.800850591716  | 0.91599197287385 9  |
| 61         | purine nucleoside triphosphate biosynthetic process                                                 |                  |                     |
| GO:0000387 | 3.02533742730919e-07                                                                                | 19.7361111111111 | 0.46550411736212    |
| 7 31       | spliceosomal snRNP assembly                                                                         |                  |                     |
| GO:0006839 | 4.46196502600813e-07                                                                                | 8.11937571771584 | 1.56169123244066    |
| 11 104     | mitochondrial transport                                                                             |                  |                     |
| GO:0000377 | 4.47596051955915e-07                                                                                | 5.51823039446802 | 3.06331741747976    |
| 15 204     | RNA splicing, via transesterification reactions with bulged adenosine as nucleophile                |                  |                     |
| GO:0000398 | 4.47596051955915e-07                                                                                | 5.51823039446802 | 3.06331741747976    |
| 15 204     | nuclear mRNA splicing, via spliceosome                                                              |                  |                     |
| GO:0009201 | 5.0720347144576e-07                                                                                 | 10.954842032967  | 0.976057020275413 9 |
| 65         | ribonucleoside triphosphate biosynthetic process                                                    |                  |                     |
| GO:0009142 | 8.53672039585274e-07                                                                                | 10.2216346153846 | 1.03612206767698    |
| 9 69       | nucleoside triphosphate biosynthetic process                                                        |                  |                     |
| GO:0008334 | 1.49277132324399e-06                                                                                | 21.2746320778249 | 0.375406546259774   |
| 6 25       | histone mRNA metabolic process                                                                      |                  |                     |
| GO:0006200 | 1.75012456482418e-06                                                                                | 9.28846153846154 | 1.12621963877932    |
| 9 75       | ATP catabolic process                                                                               |                  |                     |
| GO:0008380 | 1.86170795560085e-06                                                                                | 4.13085097619244 | 4.85025257767629    |
| 18 323     | RNA splicing                                                                                        |                  |                     |
| GO:0000291 | 1.91640257732766e-06                                                                                | 20.2094786729858 | 0.390422808110165   |
| 6 26       | nuclear-transcribed mRNA catabolic process, exonucleolytic                                          |                  |                     |
| GO:0006099 | 1.91640257732766e-06                                                                                | 20.2094786729858 | 0.390422808110165   |
| 6 26       | tricarboxylic acid cycle                                                                            |                  |                     |
| GO:0043928 | 1.91640257732766e-06                                                                                | 20.2094786729858 | 0.390422808110165   |
| 6 26       | exonucleolytic nuclear-transcribed mRNA catabolic process involved in deadenylation-dependent decay |                  |                     |
| GO:0046034 | 2.04380086286044e-06                                                                                | 6.85631067961165 | 1.81696768389731    |
| 11 121     | ATP metabolic process                                                                               |                  |                     |
| GO:0046356 | 2.43322641419875e-06                                                                                | 19.2457684495599 | 0.405439069960556   |
| 6 27       | acetyl-CoA catabolic process                                                                        |                  |                     |
| GO:0009152 | 2.44415243484746e-06                                                                                | 8.88273411371237 | 1.1712684243305 9   |
| 78         | purine ribonucleotide biosynthetic process                                                          |                  |                     |
| GO:0009060 | 2.69779069651442e-06                                                                                | 13.5228571428571 | 0.630682997716421   |
| 7 42       | aerobic respiration                                                                                 |                  |                     |
| GO:0009109 | 6.99634120062945e-06                                                                                | 15.5391906671528 | 0.480520379212511   |
| 6 32       | coenzyme catabolic process                                                                          |                  |                     |
| GO:0009260 | 8.10155114180119e-06                                                                                | 7.56036324786325 | 1.35146356653519    |
| 9 90       | ribonucleotide biosynthetic process                                                                 |                  |                     |
| GO:0006397 | 9.4570397907309e-06                                                                                 | 3.49848484848485 | 5.991488478306 19   |
| 399        | mRNA processing                                                                                     |                  |                     |
| GO:0051187 | 1.97713738455066e-05                                                                                | 12.6202606635071 | 0.570617950314857   |
| 6 38       | cofactor catabolic process                                                                          |                  |                     |

Tissue: Adipose\_Subcutaneous=>Artery\_Tibial Type: cluster

SourceGene: SHFM1(ENSG00000127922.5)

|                |          |        |       |         |         |         |        |       |
|----------------|----------|--------|-------|---------|---------|---------|--------|-------|
| TargetGeneSet: | AURKAIP1 | MRPL20 | PARK7 | SLC45A1 | CASZ1   | PLEKHM2 | RP11   | UBR4  |
| ATPIF1         | 7SK      | INSL3  | PPCS  | TDPX2   | UQCRH   | MAGOH   | MRPL37 | HBXIP |
| ATP5F1         | MRPS21   | SCNM1  | THEM4 | S100A6  | DENND4B | LAMTOR2 | PFDN2  | UFC1  |
|                |          |        |       |         |         |         |        | SDHC  |

Stable4\_20PerPair

| GO:ID      | Count            | Size              | Term                                                                                 |
|------------|------------------|-------------------|--------------------------------------------------------------------------------------|
| GO:0022904 | 45.4400586134261 |                   | 1.42163172098817                                                                     |
| 35         | 96               |                   | respiratory electron transport chain                                                 |
| GO:0022900 | 29.1793166704884 |                   | 1.98436094387932                                                                     |
| 36         | 134              |                   | electron transport chain                                                             |
| GO:0045333 | 25.8210202057119 |                   | 2.10283025396166                                                                     |
| 35         | 142              |                   | cellular respiration                                                                 |
| GO:0015980 | 10.8135383971542 |                   | 4.54625977441008                                                                     |
| 37         | 307              |                   | energy derivation by oxidation of organic compounds                                  |
| GO:0042773 | 44.9936664320901 |                   | 0.69600719673379                                                                     |
| 18         | 47               |                   | ATP synthesis coupled electron transport                                             |
| GO:0042775 | 44.9936664320901 |                   | 0.69600719673379                                                                     |
| 18         | 47               |                   | mitochondrial ATP synthesis coupled electron transport                               |
| GO:0006119 | 35.4716633793557 |                   | 0.858902498097017                                                                    |
| 19         | 58               |                   | oxidative phosphorylation                                                            |
| GO:0006120 | 57.4424242424242 |                   | 0.533111895370563                                                                    |
| 16         | 36               |                   | mitochondrial electron transport, NADH to ubiquinone                                 |
| GO:0006091 | 7.93348512669849 |                   | 6.33810808940558                                                                     |
| 39         | 428              |                   | generation of precursor metabolites and energy                                       |
| GO:0042776 | 80.20692431562   | 0.192512628883814 | 7                                                                                    |
| 13         |                  |                   | mitochondrial ATP synthesis coupled proton transport                                 |
| GO:0015985 | 43.733860342556  | 0.266555947685281 | 7                                                                                    |
| 18         |                  |                   | energy coupled proton transport, down electrochemical gradient                       |
| GO:0015986 | 43.733860342556  | 0.266555947685281 | 7                                                                                    |
| 18         |                  |                   | ATP synthesis coupled proton transport                                               |
| GO:0000377 | 6.03868471953578 |                   | 3.02096740709985                                                                     |
| 16         | 204              |                   | RNA splicing, via transesterification reactions with bulged adenosine as nucleophile |
| GO:0000398 | 6.03868471953578 |                   | 3.02096740709985                                                                     |
| 16         | 204              |                   | nuclear mRNA splicing, via spliceosome                                               |
| GO:0000375 | 5.88014863662532 |                   | 3.09501072590132                                                                     |
| 16         | 209              |                   | RNA splicing, via transesterification reactions                                      |
| GO:0000387 | 20.0263687600644 |                   | 0.459068576569096                                                                    |
| 7          | 31               |                   | spliceosomal snRNP assembly                                                          |
| GO:0008380 | 4.46570512820513 |                   | 4.78319839457477                                                                     |
| 19         | 323              |                   | RNA splicing                                                                         |
| GO:0006839 | 8.24111446580857 |                   | 1.54010103107051                                                                     |

STable4\_20PerPair

|                                             |        |                                                                                                     |                  |                   |          |                    |          |                   |       |      |
|---------------------------------------------|--------|-----------------------------------------------------------------------------------------------------|------------------|-------------------|----------|--------------------|----------|-------------------|-------|------|
| 11                                          | 104    | mitochondrial transport                                                                             |                  |                   |          |                    |          |                   |       |      |
| GO:0006397                                  |        | 5.04419637022262e-07                                                                                | 3.98934945308002 |                   |          |                    |          | 5.90865684035707  |       |      |
| 21                                          | 399    | mRNA processing                                                                                     |                  |                   |          |                    |          |                   |       |      |
| GO:0000291                                  |        | 1.76742644042912e-06                                                                                | 20.5052884615385 |                   |          |                    |          | 0.385025257767629 |       |      |
| 6                                           | 26     | nuclear-transcribed mRNA catabolic process, exonucleolytic                                          |                  |                   |          |                    |          |                   |       |      |
| GO:0043928                                  |        | 1.76742644042912e-06                                                                                | 20.5052884615385 |                   |          |                    |          | 0.385025257767629 |       |      |
| 6                                           | 26     | exonucleolytic nuclear-transcribed mRNA catabolic process involved in deadenylation-dependent decay |                  |                   |          |                    |          |                   |       |      |
| GO:0015992                                  |        | 5.57481779288666e-06                                                                                | 9.49380649481085 |                   |          |                    |          | 0.977371808179365 |       |      |
| 8                                           | 66     | proton transport                                                                                    |                  |                   |          |                    |          |                   |       |      |
| GO:0006818                                  |        | 6.99519943735294e-06                                                                                | 9.17605177993527 |                   |          |                    |          | 1.00698913569995  |       |      |
| 8                                           | 68     | hydrogen transport                                                                                  |                  |                   |          |                    |          |                   |       |      |
| GO:0006754                                  |        | 7.1730428209445e-06                                                                                 | 11.4291465378422 |                   |          |                    |          | 0.725624524254377 |       |      |
| 7                                           | 49     | ATP biosynthetic process                                                                            |                  |                   |          |                    |          |                   |       |      |
| GO:0006200                                  |        | 1.46104216620105e-05                                                                                | 8.21330241993914 |                   |          |                    |          | 1.11064978202201  |       |      |
| 8                                           | 75     | ATP catabolic process                                                                               |                  |                   |          |                    |          |                   |       |      |
| Tissue: Artery_Tibial=>Heart_Left_Ventricle |        | Type: asymmetric                                                                                    |                  |                   |          |                    |          |                   |       |      |
| SourceGene:                                 |        | ALG10B(ENSG00000175548.4)                                                                           |                  |                   |          |                    |          |                   |       |      |
| TargetGeneSet:                              |        | CELA2B                                                                                              | CELA3B           | CELA3A            | AMY2A    | CPB1               | SPINK1   | CLPS              | SNHG5 | CPA2 |
| CPA1                                        | PRSS1  | PRSS3P1                                                                                             | GSDMD            | PIGO              | PNLIP    | PNLIPRP1           |          | PNLIPRP2          |       | CFL1 |
| GP2                                         | CTRB2  | CTRB1                                                                                               | DOHH             | SYCN              | RBPJL    |                    |          |                   |       |      |
| GOBPID                                      | Pvalue | OddsRatio                                                                                           | ExpCount         | Count             | Size     | Term               |          |                   |       |      |
| GO:0007586                                  |        | 1.51426135092439e-12                                                                                | 87.3054074638233 |                   |          | 0.158397342744447  |          |                   |       |      |
| 8                                           | 109    | digestion                                                                                           |                  |                   |          |                    |          |                   |       |      |
| GO:0044241                                  |        | 1.18997840725084e-06                                                                                | 200.25           | 0.021797799460245 |          | 3                  | 15       |                   |       |      |
| lipid digestion                             |        |                                                                                                     |                  |                   |          |                    |          |                   |       |      |
| GO:0022617                                  |        | 1.83105550247234e-05                                                                                | 72.7121212121212 |                   |          | 0.0523147187045879 |          |                   |       |      |
| 3                                           | 36     | extracellular matrix disassembly                                                                    |                  |                   |          |                    |          |                   |       |      |
| Tissue: Artery_Tibial=>Heart_Left_Ventricle |        | Type: asymmetric                                                                                    |                  |                   |          |                    |          |                   |       |      |
| SourceGene:                                 |        | ATCAY(ENSG00000167654.11)                                                                           |                  |                   |          |                    |          |                   |       |      |
| TargetGeneSet:                              |        | SLC35E2                                                                                             | RPL11            | DCDC2B            | KIAA1522 | RPL5               | ANXA9    | ASH1L             |       |      |
| USP34                                       | TGOLN2 | ENO1P4                                                                                              | NGLY1            | RPL14             | RNF123   | MGLL               | RP11     | FRYL              | WWC2  | CTD  |
| SERF1B                                      | GNB2L1 | COQ3                                                                                                | TNRC18           | MRPS24            | RPS3AP26 | RPS20              | DCAF13   | RPS24             | TUB   |      |
| PPP6R3                                      | ERC1   | MLL4                                                                                                | SMARCC2          | COX17P1           | ISCA2    | C14orf1            | CDC42BPB | VPS39             |       |      |
| HERC1                                       | RPL4   | SEC11A                                                                                              | HDDC3            | NDUFB10           | TSC2     | RPS15A             | POLR2C   | ZZEF1             | RPL26 |      |
| RPS7P1                                      | TAOK1  | RPL27                                                                                               | RPS7P11          | MRPL27            | SNRPD1   | C18orf21           | TNPO2    | CIC               |       |      |
| IQSEC2                                      | COX7B  | FUNDC2                                                                                              |                  |                   |          |                    |          |                   |       |      |
| GOBPID                                      | Pvalue | OddsRatio                                                                                           | ExpCount         | Count             | Size     | Term               |          |                   |       |      |
| GO:0006614                                  |        | 5.3498284809783e-13                                                                                 | 44.3095975232198 |                   |          | 0.31970105875026   |          |                   |       |      |
| 10                                          | 105    | SRP-dependent cotranslational protein targeting to membrane                                         |                  |                   |          |                    |          |                   |       |      |
| GO:0006613                                  |        | 5.89440433861055e-13                                                                                | 43.8449754901961 |                   |          | 0.322745830738357  |          |                   |       |      |
| 10                                          | 106    | cotranslational protein targeting to membrane                                                       |                  |                   |          |                    |          |                   |       |      |
| GO:0045047                                  |        | 5.89440433861055e-13                                                                                | 43.8449754901961 |                   |          | 0.322745830738357  |          |                   |       |      |
| 10                                          | 106    | protein targeting to ER                                                                             |                  |                   |          |                    |          |                   |       |      |
| GO:0072599                                  |        | 5.89440433861055e-13                                                                                | 43.8449754901961 |                   |          | 0.322745830738357  |          |                   |       |      |
| 10                                          | 106    | establishment of protein localization to endoplasmic reticulum                                      |                  |                   |          |                    |          |                   |       |      |
| GO:0070972                                  |        | 1.75739236583815e-12                                                                                | 38.9406318082789 |                   |          | 0.35928309459553   |          |                   |       |      |
| 10                                          | 118    | protein localization to endoplasmic reticulum                                                       |                  |                   |          |                    |          |                   |       |      |
| GO:0006415                                  |        | 6.14705621497614e-12                                                                                | 44.9216027874564 |                   |          | 0.277074250916892  |          |                   |       |      |
| 9                                           | 91     | translational termination                                                                           |                  |                   |          |                    |          |                   |       |      |
| GO:0019080                                  |        | 2.10359359521579e-11                                                                                | 29.7580308719232 |                   |          | 0.459760570202754  |          |                   |       |      |
| 10                                          | 151    | viral genome expression                                                                             |                  |                   |          |                    |          |                   |       |      |
| GO:0019083                                  |        | 2.10359359521579e-11                                                                                | 29.7580308719232 |                   |          | 0.459760570202754  |          |                   |       |      |
| 10                                          | 151    | viral transcription                                                                                 |                  |                   |          |                    |          |                   |       |      |
| GO:0006414                                  |        | 2.28563692869326e-11                                                                                | 38.3330357142857 |                   |          | 0.31970105875026   |          |                   |       |      |
| 9                                           | 105    | translational elongation                                                                            |                  |                   |          |                    |          |                   |       |      |
| GO:0006612                                  |        | 2.39882978429815e-11                                                                                | 29.337721102427  | 0.46585011417895  |          | 10                 |          |                   |       |      |
| 153                                         |        | protein targeting to membrane                                                                       |                  |                   |          |                    |          |                   |       |      |
| GO:0000184                                  |        | 7.13438509531244e-11                                                                                | 33.4215584415584 |                   |          | 0.362327866583627  |          |                   |       |      |
| 9                                           | 119    | nuclear-transcribed mRNA catabolic process, nonsense-mediated decay                                 |                  |                   |          |                    |          |                   |       |      |
| GO:0034623                                  |        | 8.60882279304478e-11                                                                                | 25.543400286944  | 0.529790325929001 |          | 10                 |          |                   |       |      |
| 174                                         |        | cellular macromolecular complex disassembly                                                         |                  |                   |          |                    |          |                   |       |      |
| GO:0032984                                  |        | 1.13906511263041e-10                                                                                | 24.7789766794292 |                   |          | 0.54501418586949   |          |                   |       |      |

STable4\_20PerPair

|                                             |          |                                                    |                  |                    |          |          |          |                   |         |      |
|---------------------------------------------|----------|----------------------------------------------------|------------------|--------------------|----------|----------|----------|-------------------|---------|------|
| 10                                          | 179      | macromolecular complex disassembly                 |                  |                    |          |          |          |                   |         |      |
| GO:0072594                                  |          | 4.11819688568161e-10                               | 21.547907822923  | 0.621133485571933  |          |          |          |                   | 10      |      |
| 204                                         |          | establishment of protein localization to organelle |                  |                    |          |          |          |                   |         |      |
| GO:0006413                                  |          | 6.43233951888559e-10                               | 25.6495504495504 |                    |          |          |          | 0.462805342190852 |         |      |
| 9                                           | 152      | translational initiation                           |                  |                    |          |          |          |                   |         |      |
| GO:0043624                                  |          | 6.81936805266407e-10                               | 25.4696428571429 |                    |          |          |          | 0.46585011417895  |         |      |
| 9                                           | 153      | cellular protein complex disassembly               |                  |                    |          |          |          |                   |         |      |
| GO:0043241                                  |          | 9.07867156857262e-10                               | 24.6063279002876 |                    |          |          |          | 0.481073974119438 |         |      |
| 9                                           | 158      | protein complex disassembly                        |                  |                    |          |          |          |                   |         |      |
| GO:0019058                                  |          | 1.38261437436767e-09                               | 18.8794250731967 |                    |          |          |          | 0.703342329250571 |         |      |
| 10                                          | 231      | viral infectious cycle                             |                  |                    |          |          |          |                   |         |      |
| GO:0000956                                  |          | 1.64917272782406e-09                               | 22.8969642857143 |                    |          |          |          | 0.514566465988513 |         |      |
| 9                                           | 169      | nuclear-transcribed mRNA catabolic process         |                  |                    |          |          |          |                   |         |      |
| GO:0006402                                  |          | 2.60802104409707e-09                               | 21.6639053254438 |                    |          |          |          | 0.541969413881392 |         |      |
| 9                                           | 178      | mRNA catabolic process                             |                  |                    |          |          |          |                   |         |      |
| GO:0022415                                  |          | 4.33241926972594e-09                               | 16.6552941176471 |                    |          |          |          | 0.791640716905404 |         |      |
| 10                                          | 260      | viral reproductive process                         |                  |                    |          |          |          |                   |         |      |
| GO:0006401                                  |          | 9.00427829797012e-09                               | 18.6441690962099 |                    |          |          |          | 0.62417825756003  |         |      |
| 9                                           | 205      | RNA catabolic process                              |                  |                    |          |          |          |                   |         |      |
| GO:0071845                                  |          | 1.00945754043179e-08                               | 15.1706741090597 |                    |          |          |          | 0.864715244619749 |         |      |
| 10                                          | 284      | cellular component disassembly at cellular level   |                  |                    |          |          |          |                   |         |      |
| GO:0022411                                  |          | 1.15355570861207e-08                               | 14.948159119763  | 0.87689433257214   |          |          |          |                   | 10      |      |
| 288                                         |          | cellular component disassembly                     |                  |                    |          |          |          |                   |         |      |
| GO:0042273                                  |          | 3.63450224529092e-08                               | 179.9875         | 0.0365372638571725 |          |          |          |                   | 4       |      |
| 12                                          |          | ribosomal large subunit biogenesis                 |                  |                    |          |          |          |                   |         |      |
| GO:0033365                                  |          | 1.18742772274158e-07                               | 10.0613275613276 |                    |          |          |          | 1.44017715037022  |         |      |
| 11                                          | 473      | protein localization to organelle                  |                  |                    |          |          |          |                   |         |      |
| GO:0006605                                  |          | 1.21303468067644e-07                               | 10.0388768898488 |                    |          |          |          | 1.44322192235831  |         |      |
| 11                                          | 474      | protein targeting                                  |                  |                    |          |          |          |                   |         |      |
| GO:0022613                                  |          | 3.33587853221997e-07                               | 14.531490015361  | 0.685073697321985  |          |          |          |                   | 8       |      |
| 225                                         |          | ribonucleoprotein complex biogenesis               |                  |                    |          |          |          |                   |         |      |
| GO:0071843                                  |          | 5.27937993328423e-07                               | 13.6373256373256 |                    |          |          |          | 0.727700505155353 |         |      |
| 8                                           | 239      | cellular component biogenesis at cellular level    |                  |                    |          |          |          |                   |         |      |
| GO:0006364                                  |          | 6.7936221870074e-07                                | 23.0542427497315 |                    |          |          |          | 0.316656286762162 |         |      |
| 6                                           | 104      | rRNA processing                                    |                  |                    |          |          |          |                   |         |      |
| GO:0016032                                  |          | 7.598600501804e-07                                 | 9.31439242363612 |                    |          |          |          | 1.37319216663207  |         |      |
| 10                                          | 451      | viral reproduction                                 |                  |                    |          |          |          |                   |         |      |
| GO:0016072                                  |          | 9.46033587040975e-07                               | 21.7150809716599 |                    |          |          |          | 0.334924918690748 |         |      |
| 6                                           | 110      | rRNA metabolic process                             |                  |                    |          |          |          |                   |         |      |
| GO:0042254                                  |          | 5.55064422131899e-06                               | 15.7497239602503 |                    |          |          |          | 0.453671026226559 |         |      |
| 6                                           | 149      | ribosome biogenesis                                |                  |                    |          |          |          |                   |         |      |
| Tissue: Artery_Tibial=>Heart_Left_Ventricle |          | Type: asymmetric                                   |                  |                    |          |          |          |                   |         |      |
| SourceGene: ENSG00000230807.1               |          |                                                    |                  |                    |          |          |          |                   |         |      |
| TargetGeneSet:                              |          | MRPL20                                             | UBE4B            | RP4                | SPEN     | EIF1AX   | RP1      | PUM1              | AK2     |      |
| AKR1A1                                      | TAL1     | ZCCHC11                                            | RP11             | ITGA10             | MRPS21   | PMF1     | TMC01    | FAM5B             | COG2    |      |
| PQLC3                                       | SOCS5    | COX5B                                              | UXS1             | RANBP2             | SCTR     | CLASP1   | ATP5G3   | MYO1B             | NDUFB3  |      |
| KANSL1L                                     | RPL37A   | CCDC72                                             | RNF123           | C3orf78            | ABTB1    | RPL35A   | GAK      | MXD4              | LAMTOR3 |      |
| PAPSS1                                      | SMARCA5  | CTSO                                               | TMA16            | TXNDC15            | SOX9     | SLC35A4  | FBX038   | ARMC12            | MRPL2   |      |
| TDRD6                                       | HMG3     | GTF3C6                                             | C7orf26          | NDUFA4             | MRPS24   | SEC61G   | ECD      | BRI3              | ATP5J2  | POP7 |
| ZNF800                                      | SLC13A4  | NDUFB2                                             | ZNF746           | MCPH1              | KAT6A    | UBE2V2   | MRPS35   | C8orf59           | NDUFB9  | IL33 |
| C9orf123                                    |          | COL15A1                                            | SLC31A1          | RC3H2              | RSU1     | KIAA0913 |          | C10orf11          |         |      |
| EIF5AL1                                     | USMG5    | PPIAP19                                            | AP2A2            | C11orf10           |          | FADS2    | COX8A    | VEGFB             | PRDX5   | FAU  |
| PCNXL3                                      | RELA     | PPP6R3                                             | PKNOX2           | COX14              | TENC1    | NDUFA12  | C12orf73 |                   | ULK1    | DAD1 |
| MRPL52                                      | ADCY4    | RPS29                                              | FRMD6            | PPM1A              | ERH      | ZFYVE1   | NEK9     | SLIRP             | NDUFB1  |      |
| VPS39                                       | RPL4     | IMP3                                               | NPRL3            | NDUFB10            | FLYWCH2  | SETD1A   | COX4I1   | ZC3H18            | PSMB6   |      |
| TXNDC17                                     | CTC1     | RPS7P1                                             | GIT1             | RASL10B            | RPL27    | HDAC5    | ITGA2B   | PLEKHM1           | NFE2L1  |      |
| CALCOCO2                                    |          | PPM1D                                              | RPL38            | ATP5H              | LLGL2    | C17orf89 |          | MYL12B            | GALNT1  |      |
| CTDP1                                       | C19orf35 |                                                    | SAFB             | XAB2               | MRPL4    | CC2D1A   | MAST3    | MAU2              | LPAR2   |      |
| ATP13A1                                     | COX6B1   | PSENE1                                             | BLVRB            | TMEM91             | PPP6R1   | PLCG1    | RPS21    | CABIN1            | TPST2   |      |
| SNORD125                                    |          | PLA2G6                                             | TUBGCP6          | SMS                | EEF1B2P3 |          | COX7B    | NDUFA1            | APLN    |      |
| GOBPID                                      | Pvalue   | OddsRatio                                          | ExpCount         | Count              | Size     | Term     |          |                   |         |      |
| GO:0022904                                  |          | 7.98769694576923e-15                               | 22.5356125356125 |                    |          |          |          | 0.87689433257214  |         |      |
| 15                                          | 96       | respiratory electron transport chain               |                  |                    |          |          |          |                   |         |      |

Stable4\_20PerPair

|                                                        |                      |                                                                     |                     |
|--------------------------------------------------------|----------------------|---------------------------------------------------------------------|---------------------|
| GO:0022900                                             | 7.61119557949721e-14 | 16.5996493278784                                                    | 1.22399833921528    |
| 16                                                     | 134                  | electron transport chain                                            |                     |
| GO:0045333                                             | 2.9378183147757e-12  | 14.3266707046235                                                    | 1.29707286692962    |
| 15                                                     | 142                  | cellular respiration                                                |                     |
| GO:0015980                                             | 1.9929231767191e-08  | 6.64912904372556                                                    | 2.80423500103799    |
| 16                                                     | 307                  | energy derivation by oxidation of organic compounds                 |                     |
| GO:0006120                                             | 3.02707805738153e-08 | 27.5944827586207                                                    | 0.328835374714553   |
| 7                                                      | 36                   | mitochondrial electron transport, NADH to ubiquinone                |                     |
| GO:0006415                                             | 1.40107317860821e-07 | 12.7040452111838                                                    | 0.831222752750675   |
| 9                                                      | 91                   | translational termination                                           |                     |
| GO:0042773                                             | 2.09804652824833e-07 | 19.9906 0.429312850321777                                           | 7 47                |
| ATP synthesis coupled electron transport               |                      |                                                                     |                     |
| GO:0042775                                             | 2.09804652824833e-07 | 19.9906 0.429312850321777                                           | 7 47                |
| mitochondrial ATP synthesis coupled electron transport |                      |                                                                     |                     |
| GO:0006091                                             | 3.57086772064615e-07 | 5.00234846080609                                                    | 3.90948723271746    |
| 17                                                     | 428                  | generation of precursor metabolites and energy                      |                     |
| GO:0006414                                             | 4.82418233945863e-07 | 10.8407012195122                                                    | 0.959103176250778   |
| 9                                                      | 105                  | translational elongation                                            |                     |
| GO:0006614                                             | 4.82418233945863e-07 | 10.8407012195122                                                    | 0.959103176250778   |
| 9                                                      | 105                  | SRP-dependent cotranslational protein targeting to membrane         |                     |
| GO:0006613                                             | 5.23145762962558e-07 | 10.7281870756852                                                    | 0.968237492215072   |
| 9                                                      | 106                  | cotranslational protein targeting to membrane                       |                     |
| GO:0045047                                             | 5.23145762962558e-07 | 10.7281870756852                                                    | 0.968237492215072   |
| 9                                                      | 106                  | protein targeting to ER                                             |                     |
| GO:0072599                                             | 5.23145762962558e-07 | 10.7281870756852                                                    | 0.968237492215072   |
| 9                                                      | 106                  | establishment of protein localization to endoplasmic reticulum      |                     |
| GO:0006119                                             | 9.22808339435138e-07 | 15.6668235294118                                                    | 0.529790325929001   |
| 7                                                      | 58                   | oxidative phosphorylation                                           |                     |
| GO:0070972                                             | 1.29897347402138e-06 | 9.53904676661445                                                    | 1.07784928378659    |
| 9                                                      | 118                  | protein localization to endoplasmic reticulum                       |                     |
| GO:0043624                                             | 1.3627953712964e-06  | 8.12564484695632                                                    | 1.39755034253685    |
| 10                                                     | 153                  | cellular protein complex disassembly                                |                     |
| GO:0043241                                             | 1.82632862887981e-06 | 7.8483606557377                                                     | 1.44322192235831 10 |
| 158                                                    |                      | protein complex disassembly                                         |                     |
| GO:0034623                                             | 4.35335253573461e-06 | 7.07467013194722                                                    | 1.589370977787 10   |
| 174                                                    |                      | cellular macromolecular complex disassembly                         |                     |
| GO:0032984                                             | 5.60271956255934e-06 | 6.86293529925308                                                    | 1.63504255760847    |
| 10                                                     | 179                  | macromolecular complex disassembly                                  |                     |
| GO:0019080                                             | 9.94819710749006e-06 | 7.30522157334249                                                    | 1.37928171060826    |
| 9                                                      | 151                  | viral genome expression                                             |                     |
| GO:0019083                                             | 9.94819710749006e-06 | 7.30522157334249                                                    | 1.37928171060826    |
| 9                                                      | 151                  | viral transcription                                                 |                     |
| GO:0006413                                             | 1.0493523203216e-05  | 7.25362442435613                                                    | 1.38841602657256    |
| 9                                                      | 152                  | translational initiation                                            |                     |
| GO:0006612                                             | 1.1064193692711e-05  | 7.20274390243902                                                    | 1.39755034253685    |
| 9                                                      | 153                  | protein targeting to membrane                                       |                     |
| GO:0000184                                             | 1.3130513094014e-05  | 8.25806451612903                                                    | 1.08698359975088    |
| 8                                                      | 119                  | nuclear-transcribed mRNA catabolic process, nonsense-mediated decay |                     |

Tissue: Artery\_Tibial=>Heart\_Left\_Ventricle Type: cluster

SourceGene: ENSG00000230807.1

| TargetGeneSet: | MRPL20  | UBE4B   | RP4     | SPEN     | EIF1AX  | RP1      | PUM1     | AK2      |         |      |
|----------------|---------|---------|---------|----------|---------|----------|----------|----------|---------|------|
| AKR1A1         | TAL1    | ZCCHC11 | RP11    | ITGA10   | MRPS21  | PMF1     | TMC01    | FAM5B    | COG2    |      |
| PQLC3          | SOCS5   | COX5B   | UXS1    | RANBP2   | SCTR    | CLASP1   | ATP5G3   | MYO1B    | NDUFB3  |      |
| KANSL1L        | RPL37A  | CCDC72  | RNF123  | C3orf78  | ABTB1   | RPL35A   | GAK      | MXD4     | LAMTOR3 |      |
| PAPSS1         | SMARCA5 | CTS0    | TMA16   | TXNDC15  | SOX9    | SLC35A4  | FBX038   | ARMC12   | MRPL2   |      |
| TDRD6          | HMGN3   | GTF3C6  | C7orf26 | NDUFA4   | MRPS24  | SEC61G   | ECD      | BRI3     | ATP5J2  | POP7 |
| ZNF800         | SLC13A4 | NDUFB2  | ZNF746  | MCPH1    | KAT6A   | UBE2V2   | MRPS35   | C8orf59  | NDUFB9  | IL33 |
| C9orf123       |         | COL15A1 | SLC31A1 | RC3H2    | RSU1    | KIAA0913 |          | C10orf11 |         |      |
| EIF5AL1        | USMG5   | PPIAP19 | AP2A2   | C11orf10 | FADS2   | COX8A    | VEGFB    | PRDX5    | FAU     |      |
| PCNXL3         | RELA    | PPP6R3  | PKNOX2  | COX14    | TENC1   | NDUFA12  | C12orf73 | ULK1     | DAD1    |      |
| MRPL52         | ADCY4   | RPS29   | FRMD6   | PPM1A    | ERH     | ZFYVE1   | NEK9     | SLIRP    | NDUFB1  |      |
| VPS39          | RPL4    | IMP3    | NPRL3   | NDUFB10  | FLYWCH2 | SETD1A   | COX4I1   | ZC3H18   | PSMB6   |      |
| TXNDC17        | CTC1    | RPS7P1  | GIT1    | RASL10B  | RPL27   | HDAC5    | ITGA2B   | PLEKHM1  | NFE2L1  |      |

Stable4\_20PerPair

| GOBPID                                                 | Pvalue               | OddsRatio | ExpCount         | Count             | Size    | Term                                                                |
|--------------------------------------------------------|----------------------|-----------|------------------|-------------------|---------|---------------------------------------------------------------------|
| GO:0022904                                             | 7.98769694576923e-15 |           | 22.5356125356125 |                   |         | 0.87689433257214                                                    |
| 15                                                     | 96                   |           |                  |                   |         | respiratory electron transport chain                                |
| GO:0022900                                             | 7.61119557949721e-14 |           | 16.5996493278784 |                   |         | 1.22399833921528                                                    |
| 16                                                     | 134                  |           |                  |                   |         | electron transport chain                                            |
| GO:0045333                                             | 2.9378183147757e-12  |           | 14.3266707046235 |                   |         | 1.29707286692962                                                    |
| 15                                                     | 142                  |           |                  |                   |         | cellular respiration                                                |
| GO:0015980                                             | 1.9929231767191e-08  |           | 6.64912904372556 |                   |         | 2.80423500103799                                                    |
| 16                                                     | 307                  |           |                  |                   |         | energy derivation by oxidation of organic compounds                 |
| GO:0006120                                             | 3.02707805738153e-08 |           | 27.5944827586207 |                   |         | 0.328835374714553                                                   |
| 7                                                      | 36                   |           |                  |                   |         | mitochondrial electron transport, NADH to ubiquinone                |
| GO:0006415                                             | 1.40107317860821e-07 |           | 12.7040452111838 |                   |         | 0.831222752750675                                                   |
| 9                                                      | 91                   |           |                  |                   |         | translational termination                                           |
| GO:0042773                                             | 2.09804652824833e-07 |           | 19.9906          | 0.429312850321777 |         | 7 47                                                                |
| ATP synthesis coupled electron transport               |                      |           |                  |                   |         |                                                                     |
| GO:0042775                                             | 2.09804652824833e-07 |           | 19.9906          | 0.429312850321777 |         | 7 47                                                                |
| mitochondrial ATP synthesis coupled electron transport |                      |           |                  |                   |         |                                                                     |
| GO:0006091                                             | 3.57086772064615e-07 |           | 5.00234846080609 |                   |         | 3.90948723271746                                                    |
| 17                                                     | 428                  |           |                  |                   |         | generation of precursor metabolites and energy                      |
| GO:0006414                                             | 4.82418233945863e-07 |           | 10.8407012195122 |                   |         | 0.959103176250778                                                   |
| 9                                                      | 105                  |           |                  |                   |         | translational elongation                                            |
| GO:0006614                                             | 4.82418233945863e-07 |           | 10.8407012195122 |                   |         | 0.959103176250778                                                   |
| 9                                                      | 105                  |           |                  |                   |         | SRP-dependent cotranslational protein targeting to membrane         |
| GO:0006613                                             | 5.23145762962558e-07 |           | 10.7281870756852 |                   |         | 0.968237492215072                                                   |
| 9                                                      | 106                  |           |                  |                   |         | cotranslational protein targeting to membrane                       |
| GO:0045047                                             | 5.23145762962558e-07 |           | 10.7281870756852 |                   |         | 0.968237492215072                                                   |
| 9                                                      | 106                  |           |                  |                   |         | protein targeting to ER                                             |
| GO:0072599                                             | 5.23145762962558e-07 |           | 10.7281870756852 |                   |         | 0.968237492215072                                                   |
| 9                                                      | 106                  |           |                  |                   |         | establishment of protein localization to endoplasmic reticulum      |
| GO:0006119                                             | 9.22808339435138e-07 |           | 15.6668235294118 |                   |         | 0.529790325929001                                                   |
| 7                                                      | 58                   |           |                  |                   |         | oxidative phosphorylation                                           |
| GO:0070972                                             | 1.29897347402138e-06 |           | 9.53904676661445 |                   |         | 1.07784928378659                                                    |
| 9                                                      | 118                  |           |                  |                   |         | protein localization to endoplasmic reticulum                       |
| GO:0043624                                             | 1.3627953712964e-06  |           | 8.12564484695632 |                   |         | 1.39755034253685                                                    |
| 10                                                     | 153                  |           |                  |                   |         | cellular protein complex disassembly                                |
| GO:0043241                                             | 1.82632862887981e-06 |           | 7.8483606557377  | 1.44322192235831  |         | 10                                                                  |
| 158                                                    |                      |           |                  |                   |         | protein complex disassembly                                         |
| GO:0034623                                             | 4.35335253573461e-06 |           | 7.07467013194722 |                   |         | 1.589370977787 10                                                   |
| 174                                                    |                      |           |                  |                   |         | cellular macromolecular complex disassembly                         |
| GO:0032984                                             | 5.60271956255934e-06 |           | 6.86293529925308 |                   |         | 1.63504255760847                                                    |
| 10                                                     | 179                  |           |                  |                   |         | macromolecular complex disassembly                                  |
| GO:0019080                                             | 9.94819710749006e-06 |           | 7.30522157334249 |                   |         | 1.37928171060826                                                    |
| 9                                                      | 151                  |           |                  |                   |         | viral genome expression                                             |
| GO:0019083                                             | 9.94819710749006e-06 |           | 7.30522157334249 |                   |         | 1.37928171060826                                                    |
| 9                                                      | 151                  |           |                  |                   |         | viral transcription                                                 |
| GO:0006413                                             | 1.0493523203216e-05  |           | 7.25362442435613 |                   |         | 1.38841602657256                                                    |
| 9                                                      | 152                  |           |                  |                   |         | translational initiation                                            |
| GO:0006612                                             | 1.1064193692711e-05  |           | 7.20274390243902 |                   |         | 1.39755034253685                                                    |
| 9                                                      | 153                  |           |                  |                   |         | protein targeting to membrane                                       |
| GO:0000184                                             | 1.3130513094014e-05  |           | 8.25806451612903 |                   |         | 1.08698359975088                                                    |
| 8                                                      | 119                  |           |                  |                   |         | nuclear-transcribed mRNA catabolic process, nonsense-mediated decay |
| Tissue: Heart_Left_Ventricle=>Artery_Tibial            |                      |           |                  |                   |         | Type: asymmetric                                                    |
| SourceGene:                                            | ENSG00000239899.1    |           |                  |                   |         |                                                                     |
| TargetGeneSet:                                         | RPL22                | SDHB      | RP11             | PPIH              | MAGOH   | PFN1P3 C1orf54 SNRPE ARV1                                           |
| RPS7                                                   | UBC                  | CCDC115   | BTF3L4P2         | HDLBP             | SPCS1   | CHMP2B ATG3 MRPS18C BDH2                                            |
| RPL34                                                  | LARP7                | TBCA      | MRPL22           | UBLCP1            | RPL26L1 | SBDS C7orf59 DCTN6 SEC61B                                           |
| SH3PXD2A                                               |                      | POLR2G    | SNRPF            | TCP11L2           | ARPC3   | COMMD6 SRP54 C14orf166 ERH                                          |
| COX16                                                  | SNURF                | RPS7P1    | ARL16            | SNRPD1            | MIR1181 | SNRPB2 RP4 PSMD10                                                   |
| GOBPID                                                 | Pvalue               | OddsRatio | ExpCount         | Count             | Size    | Term                                                                |

Stable4\_20PerPair

|                                                                     |                                                                                      |                  |                   |       |
|---------------------------------------------------------------------|--------------------------------------------------------------------------------------|------------------|-------------------|-------|
| GO:0006612                                                          | 1.27453364898476e-10                                                                 | 31.8526785714286 | 0.391737596014117 |       |
| 9 153                                                               | protein targeting to membrane                                                        |                  |                   |       |
| GO:0006614                                                          | 1.92211993322925e-10                                                                 | 40.7166725915393 | 0.268839526676355 |       |
| 8 105                                                               | SRP-dependent cotranslational protein targeting to membrane                          |                  |                   |       |
| GO:0006613                                                          | 2.07530277581746e-10                                                                 | 40.2983814215341 | 0.271399903120891 |       |
| 8 106                                                               | cotranslational protein targeting to membrane                                        |                  |                   |       |
| GO:0045047                                                          | 2.07530277581746e-10                                                                 | 40.2983814215341 | 0.271399903120891 |       |
| 8 106                                                               | protein targeting to ER                                                              |                  |                   |       |
| GO:0072599                                                          | 2.07530277581746e-10                                                                 | 40.2983814215341 | 0.271399903120891 |       |
| 8 106                                                               | establishment of protein localization to endoplasmic reticulum                       |                  |                   |       |
| GO:0070972                                                          | 4.92673214021216e-10                                                                 | 35.8721003134796 | 0.302124420455332 |       |
| 8 118                                                               | protein localization to endoplasmic reticulum                                        |                  |                   |       |
| GO:0000377                                                          | 3.73574243788099e-08                                                                 | 20.0112596762843 | 0.522316794685489 |       |
| 8 204                                                               | RNA splicing, via transesterification reactions with bulged adenosine as nucleophile |                  |                   |       |
| GO:0000398                                                          | 3.73574243788099e-08                                                                 | 20.0112596762843 | 0.522316794685489 |       |
| 8 204                                                               | nuclear mRNA splicing, via spliceosome                                               |                  |                   |       |
| GO:0072594                                                          | 3.73574243788099e-08                                                                 | 20.0112596762843 | 0.522316794685489 |       |
| 8 204                                                               | establishment of protein localization to organelle                                   |                  |                   |       |
| GO:0000375                                                          | 4.50877038966395e-08                                                                 | 19.506604906502  | 0.535118676908172 | 8     |
| 209                                                                 | RNA splicing, via transesterification reactions                                      |                  |                   |       |
| GO:0006605                                                          | 2.06029408872816e-07                                                                 | 11.1350574712644 | 1.2136184347104   | 10    |
| 474                                                                 | protein targeting                                                                    |                  |                   |       |
| GO:0000184                                                          | 5.1838945958636e-07                                                                  | 24.495004282044  | 0.304684796899869 | 6     |
| 119                                                                 | nuclear-transcribed mRNA catabolic process, nonsense-mediated decay                  |                  |                   |       |
| GO:0000387                                                          | 1.08899456367171e-06                                                                 | 64.5881032547699 | 0.079371669780638 |       |
| 4 31                                                                | spliceosomal snRNP assembly                                                          |                  |                   |       |
| GO:0008380                                                          | 1.25349641021633e-06                                                                 | 12.3472359058566 | 0.827001591585357 |       |
| 8 323                                                               | RNA splicing                                                                         |                  |                   |       |
| GO:0019080                                                          | 2.09657457101439e-06                                                                 | 19.0464961067853 | 0.386616843125043 |       |
| 6 151                                                               | viral genome expression                                                              |                  |                   |       |
| GO:0019083                                                          | 2.09657457101439e-06                                                                 | 19.0464961067853 | 0.386616843125043 |       |
| 6 151                                                               | viral transcription                                                                  |                  |                   |       |
| GO:0033365                                                          | 2.19659825432831e-06                                                                 | 9.66363916256158 | 1.21105805826586  |       |
| 9 473                                                               | protein localization to organelle                                                    |                  |                   |       |
| GO:0043624                                                          | 2.26345082545556e-06                                                                 | 18.7847267939434 | 0.391737596014117 |       |
| 6 153                                                               | cellular protein complex disassembly                                                 |                  |                   |       |
| GO:0043241                                                          | 2.72856670166277e-06                                                                 | 18.160441426146  | 0.4045394782368   | 6 158 |
|                                                                     | protein complex disassembly                                                          |                  |                   |       |
| GO:0006415                                                          | 3.29492299643312e-06                                                                 | 26.031976744186  | 0.232994256452841 | 5     |
| 91                                                                  | translational termination                                                            |                  |                   |       |
| GO:0000956                                                          | 4.02933468661639e-06                                                                 | 16.9218286166634 | 0.432703619126704 |       |
| 6 169                                                               | nuclear-transcribed mRNA catabolic process                                           |                  |                   |       |
| GO:0022618                                                          | 4.07494624917772e-06                                                                 | 24.8680555555556 | 0.243235762230987 |       |
| 5 95                                                                | ribonucleoprotein complex assembly                                                   |                  |                   |       |
| GO:0034623                                                          | 4.76791874302665e-06                                                                 | 16.4124423963134 | 0.445505501349388 |       |
| 6 174                                                               | cellular macromolecular complex disassembly                                          |                  |                   |       |
| GO:0071826                                                          | 5.24624360037402e-06                                                                 | 23.5509868421053 | 0.256037644453671 |       |
| 5 100                                                               | ribonucleoprotein complex subunit organization                                       |                  |                   |       |
| GO:0006402                                                          | 5.43504343328772e-06                                                                 | 16.026256564141  | 0.455747007127534 | 6     |
| 178                                                                 | mRNA catabolic process                                                               |                  |                   |       |
| GO:0032984                                                          | 5.61316103833135e-06                                                                 | 15.932500466157  | 0.458307383572071 | 6     |
| 179                                                                 | macromolecular complex disassembly                                                   |                  |                   |       |
| GO:0006397                                                          | 6.02270326970651e-06                                                                 | 9.89364141458682 | 1.02159020137015  |       |
| 8 399                                                               | mRNA processing                                                                      |                  |                   |       |
| GO:0006414                                                          | 6.66670912870521e-06                                                                 | 22.365625        | 0.268839526676355 | 5     |
| 105                                                                 | translational elongation                                                             |                  |                   |       |
| GO:0006401                                                          | 1.22025309393652e-05                                                                 | 13.8255795104555 | 0.524877171130026 |       |
| 6 205                                                               | RNA catabolic process                                                                |                  |                   |       |
| Tissue: Heart_Left_Ventricle=>Artery_Tibial                         |                                                                                      | Type: asymmetric |                   |       |
| SourceGene: LINC00342(ENSG00000232931.1)                            |                                                                                      |                  |                   |       |
| TargetGeneSet: TTLL10 RPL11 ATP1F1 BEND5 HSD17B7 NTSR2 RPL31 RPL37A |                                                                                      |                  |                   |       |
| RPL32 RPL10AP6 RP11 ATP5I RPL37 RPS23 RPS18 RPL10A RPL39P3          |                                                                                      |                  |                   |       |



Stable4\_20PerPair

| TSPYL4                                           | C7orf50                                                             | FTSJ2                | RPL30  | RPS24            | PIK3AP1           | RPL13AP5          | RPS10P18  |          |            |
|--------------------------------------------------|---------------------------------------------------------------------|----------------------|--------|------------------|-------------------|-------------------|-----------|----------|------------|
| RPLP2                                            | FAU                                                                 | C11orf51             |        | SNORD15A         |                   | RPS25             | SAP18     | RPS26P47 |            |
| RNASE3                                           | RPS29                                                               | BATF                 | HMG2P5 | IGSF6            | SNORA70D          |                   | C17orf108 |          | RPL27 SMG8 |
| RPL38                                            | ZNF77                                                               | B3GNT3               | RPS11  | CHMP2A           | EEF1B2P3          |                   | RPS23P8   |          |            |
| GOBPID                                           | Pvalue                                                              | OddsRatio            |        | ExpCount         |                   | Count             | Size      | Term     |            |
| GO:0000184                                       |                                                                     | 7.42719078799523e-30 |        | 170.10297029703  |                   | 0.271745899937721 |           |          | 18         |
| 119                                              | nuclear-transcribed mRNA catabolic process, nonsense-mediated decay |                      |        |                  |                   |                   |           |          |            |
| GO:0006415                                       |                                                                     | 8.52135771726807e-30 |        | 205.952702702703 |                   | 0.207805688187669 |           |          |            |
| 17                                               | 91 translational termination                                        |                      |        |                  |                   |                   |           |          |            |
| GO:0006414                                       |                                                                     | 1.19774132786802e-28 |        | 173.018465909091 |                   | 0.239775794062695 |           |          |            |
| 17                                               | 105 translational elongation                                        |                      |        |                  |                   |                   |           |          |            |
| GO:0006614                                       |                                                                     | 1.19774132786802e-28 |        | 173.018465909091 |                   | 0.239775794062695 |           |          |            |
| 17                                               | 105 SRP-dependent cotranslational protein targeting to membrane     |                      |        |                  |                   |                   |           |          |            |
| GO:0006613                                       |                                                                     | 1.42502169615293e-28 |        | 171.0625         |                   | 0.242059373053768 |           |          | 17         |
| 106                                              | 106 cotranslational protein targeting to membrane                   |                      |        |                  |                   |                   |           |          |            |
| GO:0045047                                       |                                                                     | 1.42502169615293e-28 |        | 171.0625         |                   | 0.242059373053768 |           |          | 17         |
| 106                                              | 106 protein targeting to ER                                         |                      |        |                  |                   |                   |           |          |            |
| GO:0072599                                       |                                                                     | 1.42502169615293e-28 |        | 171.0625         |                   | 0.242059373053768 |           |          | 17         |
| 106                                              | 106 establishment of protein localization to endoplasmic reticulum  |                      |        |                  |                   |                   |           |          |            |
| GO:0070972                                       |                                                                     | 1.00710139228052e-27 |        | 150.612004950495 |                   | 0.269462320946647 |           |          |            |
| 17                                               | 118 protein localization to endoplasmic reticulum                   |                      |        |                  |                   |                   |           |          |            |
| GO:0006401                                       |                                                                     | 2.26457001719109e-27 |        | 103.84331797235  |                   | 0.468133693170023 |           |          | 19         |
| 205                                              | 205 RNA catabolic process                                           |                      |        |                  |                   |                   |           |          |            |
| GO:0000956                                       |                                                                     | 5.91341668537133e-27 |        | 113.380132450331 |                   | 0.385924849491385 |           |          |            |
| 18                                               | 169 nuclear-transcribed mRNA catabolic process                      |                      |        |                  |                   |                   |           |          |            |
| GO:0006402                                       |                                                                     | 1.56630778630558e-26 |        | 106.935          | 0.406477060411044 |                   | 18        |          | 178        |
| mRNA catabolic process                           |                                                                     |                      |        |                  |                   |                   |           |          |            |
| GO:0019080                                       |                                                                     | 8.4719982604753e-26  |        | 113.259328358209 |                   | 0.344820427652066 |           |          |            |
| 17                                               | 151 viral genome expression                                         |                      |        |                  |                   |                   |           |          |            |
| GO:0019083                                       |                                                                     | 8.4719982604753e-26  |        | 113.259328358209 |                   | 0.344820427652066 |           |          |            |
| 17                                               | 151 viral transcription                                             |                      |        |                  |                   |                   |           |          |            |
| GO:0006413                                       |                                                                     | 9.52877204336302e-26 |        | 112.4125         |                   | 0.347104006643139 |           |          | 17         |
| 152                                              | 152 translational initiation                                        |                      |        |                  |                   |                   |           |          |            |
| GO:0006612                                       |                                                                     | 1.07085505506166e-25 |        | 111.578125       |                   | 0.349387585634212 |           |          | 17         |
| 153                                              | 153 protein targeting to membrane                                   |                      |        |                  |                   |                   |           |          |            |
| GO:0043624                                       |                                                                     | 1.07085505506166e-25 |        | 111.578125       |                   | 0.349387585634212 |           |          | 17         |
| 153                                              | 153 cellular protein complex disassembly                            |                      |        |                  |                   |                   |           |          |            |
| GO:0043241                                       |                                                                     | 1.89674334653211e-25 |        | 107.583776595745 |                   | 0.360805480589579 |           |          |            |
| 17                                               | 158 protein complex disassembly                                     |                      |        |                  |                   |                   |           |          |            |
| GO:0034623                                       |                                                                     | 1.04633766693221e-24 |        | 96.5115445859873 |                   | 0.397342744446751 |           |          |            |
| 17                                               | 174 cellular macromolecular complex disassembly                     |                      |        |                  |                   |                   |           |          |            |
| GO:0032984                                       |                                                                     | 1.72447333136711e-24 |        | 93.5             | 0.408760639402117 |                   | 17        |          | 179        |
| macromolecular complex disassembly               |                                                                     |                      |        |                  |                   |                   |           |          |            |
| GO:0072594                                       |                                                                     | 1.71120873279172e-23 |        | 80.8579545454545 |                   | 0.46585011417895  |           |          |            |
| 17                                               | 204 establishment of protein localization to organelle              |                      |        |                  |                   |                   |           |          |            |
| GO:0019058                                       |                                                                     | 1.4935510238952e-22  |        | 70.5221962616822 |                   | 0.527506746937928 |           |          |            |
| 17                                               | 231 viral infectious cycle                                          |                      |        |                  |                   |                   |           |          |            |
| GO:0022415                                       |                                                                     | 1.15837947159721e-21 |        | 61.9791666666667 |                   | 0.593730537679053 |           |          |            |
| 17                                               | 260 viral reproductive process                                      |                      |        |                  |                   |                   |           |          |            |
| GO:0071845                                       |                                                                     | 5.30437914201888e-21 |        | 56.3125          | 0.648536433464812 |                   | 17        |          | 284        |
| cellular component disassembly at cellular level |                                                                     |                      |        |                  |                   |                   |           |          |            |
| GO:0022411                                       |                                                                     | 6.74604316332267e-21 |        | 55.4656365313653 |                   | 0.657670749429105 |           |          |            |
| 17                                               | 288 cellular component disassembly                                  |                      |        |                  |                   |                   |           |          |            |
| GO:0016032                                       |                                                                     | 1.38385996314761e-17 |        | 34.2350230414747 |                   | 1.02989412497405  |           |          |            |
| 17                                               | 451 viral reproduction                                              |                      |        |                  |                   |                   |           |          |            |
| GO:0033365                                       |                                                                     | 3.0809023528745e-17  |        | 32.5320723684211 |                   | 1.08013286277766  |           |          |            |
| 17                                               | 473 protein localization to organelle                               |                      |        |                  |                   |                   |           |          |            |
| GO:0006605                                       |                                                                     | 3.19206611551764e-17 |        | 32.4585612691466 |                   | 1.08241644176874  |           |          |            |
| 17                                               | 474 protein targeting                                               |                      |        |                  |                   |                   |           |          |            |
| GO:0022613                                       |                                                                     | 1.03848533290597e-05 |        | 14.4079147640791 |                   | 0.513805272991488 |           |          |            |
| 6                                                | 225 ribonucleoprotein complex biogenesis                            |                      |        |                  |                   |                   |           |          |            |
| GO:0071843                                       |                                                                     | 1.46423493164358e-05 |        | 13.5288507391512 |                   | 0.545775378866514 |           |          |            |
| 6                                                | 239 cellular component biogenesis at cellular level                 |                      |        |                  |                   |                   |           |          |            |

Stable4\_20PerPair

| Tissue:        | Heart_Left_Ventricle=>Artery_Tibial | Type:                                                               | cluster                 |
|----------------|-------------------------------------|---------------------------------------------------------------------|-------------------------|
| SourceGene:    | MCM9(ENSG00000111877.12)            |                                                                     |                         |
| TargetGeneSet: | TPRG1L RPL22 RP11 PSMB4 RP4         | MIR4426 MRPS9                                                       | EEF1B2                  |
| XRCC5          | RPL37A RPL32 LSM3 SPCS1 SLC25A26    | PLSCR4 KLHL7                                                        | EREG                    |
| RPL37          | RPS23 COX7C CTB RPS14               | MRPL22 PFDN6                                                        | C6orf203 ECD            |
| UQCRB          | RPL30 EIF3H NDUFB9 RPS24            | RPL13AP5                                                            | CUTC SH3PXD2A           |
| RPLP2          | RPS13 ST13P5 FAU MRPL11             | ATP5L RPS25                                                         | CLECL1 SLC25A3 RPS29    |
| RPL36A         | C14orf166 GCH1 SLIRP                | RPL4 SEC11A                                                         | NAE1 TRAPPC2L           |
| RPL26          | GSDMA PSMD3 TOP2A RPL38             | ICT1 CTD                                                            | POLR2I EIF3K RPS16 RPS5 |
| CHMP2A         | ATP50 POLR2F TOMM22 XRCC6           | EEF1B2P3                                                            | PIN4 NDUFA1 MT          |
| GOBPID         | Pvalue OddsRatio ExpCount           | Count                                                               | Size Term               |
| GO:0006614     | 3.77581317469522e-28                | 76.4812834224599                                                    | 0.465019721818559       |
| 20             | 105                                 | SRP-dependent cotranslational protein targeting                     | to membrane             |
| GO:0006613     | 4.6403266368115e-28                 | 75.5866807610994                                                    | 0.469448481073974       |
| 20             | 106                                 | cotranslational protein targeting to membrane                       |                         |
| GO:0045047     | 4.6403266368115e-28                 | 75.5866807610994                                                    | 0.469448481073974       |
| 20             | 106                                 | protein targeting to ER                                             |                         |
| GO:0072599     | 4.6403266368115e-28                 | 75.5866807610994                                                    | 0.469448481073974       |
| 20             | 106                                 | establishment of protein localization to endoplasmic reticulum      |                         |
| GO:0006415     | 1.4408454599776e-27                 | 83.945987654321                                                     | 0.403017092242751 19    |
| 91             |                                     | translational termination                                           |                         |
| GO:0070972     | 4.70563162418768e-27                | 66.2755102040816                                                    | 0.522593592138952       |
| 20             | 118                                 | protein localization to endoplasmic reticulum                       |                         |
| GO:0006612     | 2.2506420447113e-26                 | 52.7404862579281                                                    | 0.677600166078472       |
| 21             | 153                                 | protein targeting to membrane                                       |                         |
| GO:0006414     | 2.79382704897336e-26                | 70.2116279069767                                                    | 0.465019721818559       |
| 19             | 105                                 | translational elongation                                            |                         |
| GO:0019058     | 1.31734390049684e-25                | 38.2407363977486                                                    | 1.02304338800083        |
| 23             | 231                                 | viral infectious cycle                                              |                         |
| GO:0019080     | 8.75518207734649e-25                | 49.4656488549618                                                    | 0.668742647567642       |
| 20             | 151                                 | viral genome expression                                             |                         |
| GO:0019083     | 8.75518207734649e-25                | 49.4656488549618                                                    | 0.668742647567642       |
| 20             | 151                                 | viral transcription                                                 |                         |
| GO:0006413     | 1.00522200665236e-24                | 49.0874655647383                                                    | 0.673171406823057       |
| 20             | 152                                 | translational initiation                                            |                         |
| GO:0022415     | 2.10250796483243e-24                | 33.4928475867037                                                    | 1.15147740640786        |
| 23             | 260                                 | viral reproductive process                                          |                         |
| GO:0072594     | 1.18613646303371e-23                | 37.9062142584827                                                    | 0.903466888104629       |
| 21             | 204                                 | establishment of protein localization to organelle                  |                         |
| GO:0000184     | 2.09800801047902e-23                | 55.3482565647869                                                    | 0.527022351394367       |
| 18             | 119                                 | nuclear-transcribed mRNA catabolic process, nonsense-mediated decay |                         |
| GO:0043624     | 5.45992282597877e-23                | 44.9099502487562                                                    | 0.677600166078472       |
| 19             | 153                                 | cellular protein complex disassembly                                |                         |
| GO:0043241     | 1.02976878829302e-22                | 43.2792965627498                                                    | 0.699743962355546       |
| 19             | 158                                 | protein complex disassembly                                         |                         |
| GO:0000956     | 3.86304711295922e-22                | 40.0745185185185                                                    | 0.74846031416511        |
| 19             | 169                                 | nuclear-transcribed mRNA catabolic process                          |                         |
| GO:0034623     | 6.83337010906345e-22                | 38.7681720430108                                                    | 0.770604110442184       |
| 19             | 174                                 | cellular macromolecular complex disassembly                         |                         |
| GO:0006402     | 1.0648771015588e-21                 | 37.782250174703                                                     | 0.788319147463843 19    |
| 178            |                                     | mRNA catabolic process                                              |                         |
| GO:0032984     | 1.18776931445319e-21                | 37.5434722222222                                                    | 0.792747906719258       |
| 19             | 179                                 | macromolecular complex disassembly                                  |                         |
| GO:0016032     | 1.53748871462114e-21                | 21.0078849163356                                                    | 1.9973704241921 25      |
| 451            |                                     | viral reproduction                                                  |                         |
| GO:0006401     | 1.64547942256295e-20                | 32.2364396654719                                                    | 0.907895647360044       |
| 19             | 205                                 | RNA catabolic process                                               |                         |
| GO:0071845     | 3.41452377745716e-19                | 24.3164600550964                                                    | 1.25776762853782        |
| 20             | 284                                 | cellular component disassembly at cellular level                    |                         |
| GO:0022411     | 4.50722596817026e-19                | 23.9467435549525                                                    | 1.27548266555948        |
| 20             | 288                                 | cellular component disassembly                                      |                         |
| GO:0033365     | 4.69806337960388e-16                | 15.0563387528298                                                    | 2.09480312781122        |
| 21             | 473                                 | protein localization to organelle                                   |                         |

Stable4\_20PerPair

|                                                              |                      |                                      |                      |                  |         |                                                                |          |           |         |      |
|--------------------------------------------------------------|----------------------|--------------------------------------|----------------------|------------------|---------|----------------------------------------------------------------|----------|-----------|---------|------|
| GO:0006605                                                   | 4.9014825936731e-16  | 15.02202371785                       | 2.09923188706664     | 21               |         |                                                                |          |           |         |      |
| 474                                                          | protein targeting    |                                      |                      |                  |         |                                                                |          |           |         |      |
| GO:0042274                                                   | 1.02171131577435e-06 | 68.4428571428571                     | 0.0797176665974673   |                  |         |                                                                |          |           |         |      |
| 4                                                            | 18                   | ribosomal small subunit biogenesis   |                      |                  |         |                                                                |          |           |         |      |
| GO:0022904                                                   | 4.03401597916559e-06 | 16.4333333333333                     | 0.425160888519826    |                  |         |                                                                |          |           |         |      |
| 6                                                            | 96                   | respiratory electron transport chain |                      |                  |         |                                                                |          |           |         |      |
| Tissue: Artery_Tibial=>Heart_Left_Ventricle Type: asymmetric |                      |                                      |                      |                  |         |                                                                |          |           |         |      |
| SourceGene: RP11-330011.2(ENSG00000237135.1)                 |                      |                                      |                      |                  |         |                                                                |          |           |         |      |
| TargetGeneSet:                                               | LRRC47               | RP11                                 | KPNA7                | MTMR9LP          | PKP1    | NDUFB3                                                         | GRIP2    | QRICH1    |         |      |
| C3orf18                                                      | PSMC1P1              | ZDHHC23                              | FGF12                | NDUFS6           | PAK1IP1 | NUDT3                                                          | COX7A2   | CYCS      | MRPS24  |      |
| PKD1L1                                                       | ATP5J2               | HEMGN                                | GLE1                 | USMG5            | NUMA1   | SCARNA11                                                       |          | TMBIM6    | PYGL    | NPC2 |
| TECPR2                                                       | CHTF18               | NDUFB10                              | PARN                 | ELAC2            | EFTUD2  | ATP5G1                                                         | RNMT     | SNRPD1    | CYP2T2P |      |
| TRAPPC6A                                                     |                      | ERCC1                                | NDUFA3               | MKKS             | CSTF1   | ATP5J                                                          | C22orf32 |           | LMF2    |      |
| ZMYM3                                                        | NDUFA1               |                                      |                      |                  |         |                                                                |          |           |         |      |
| GOBPID                                                       | Pvalue               | OddsRatio                            | ExpCount             | Count            | Size    | Term                                                           |          |           |         |      |
| GO:0022904                                                   | 9                    | 96                                   | 1.39504059708167e-12 | 54.8965517241379 |         | 0.239152999792402                                              |          |           |         |      |
|                                                              |                      |                                      |                      |                  |         | respiratory electron transport chain                           |          |           |         |      |
| GO:0022900                                                   | 9                    | 134                                  | 2.9432682968323e-11  | 38.1066666666667 |         | 0.333817728876894                                              |          |           |         |      |
|                                                              |                      |                                      |                      |                  |         | electron transport chain                                       |          |           |         |      |
| GO:0045333                                                   | 9                    | 142                                  | 4.97110600141933e-11 | 35.7944862155388 |         | 0.353747145526261                                              |          |           |         |      |
|                                                              |                      |                                      |                      |                  |         | cellular respiration                                           |          |           |         |      |
| GO:0015980                                                   | 10                   | 307                                  | 2.5219447117279e-09  | 18.2828282828283 |         | 0.764791363919452                                              |          |           |         |      |
|                                                              |                      |                                      |                      |                  |         | energy derivation by oxidation of organic compounds            |          |           |         |      |
| GO:0006120                                                   | 5                    | 36                                   | 2.56186638236061e-08 | 74.8387096774194 |         | 0.0896823749221507                                             |          |           |         |      |
|                                                              |                      |                                      |                      |                  |         | mitochondrial electron transport, NADH to ubiquinone           |          |           |         |      |
| GO:0006091                                                   | 10                   | 428                                  | 5.96347794793088e-08 | 12.8790945896209 |         | 1.06622379074113                                               |          |           |         |      |
|                                                              |                      |                                      |                      |                  |         | generation of precursor metabolites and energy                 |          |           |         |      |
| GO:0042773                                                   | 5                    | 47                                   | 1.02206716530266e-07 | 55.1958525345622 |         | 0.11708532281503                                               |          |           |         |      |
|                                                              |                      |                                      |                      |                  |         | ATP synthesis coupled electron transport                       |          |           |         |      |
| GO:0042775                                                   | 5                    | 47                                   | 1.02206716530266e-07 | 55.1958525345622 |         | 0.11708532281503                                               |          |           |         |      |
|                                                              |                      |                                      |                      |                  |         | mitochondrial ATP synthesis coupled electron transport         |          |           |         |      |
| GO:0006119                                                   | 5                    | 58                                   | 2.993531095236e-07   | 43.7066342057212 |         | 0.144488270707909                                              |          |           |         |      |
|                                                              |                      |                                      |                      |                  |         | oxidative phosphorylation                                      |          |           |         |      |
| GO:0042776                                                   | 3                    | 13                                   | 3.9917922038184e-06  | 130.954545454545 |         | 0.0323853020552211                                             |          |           |         |      |
|                                                              |                      |                                      |                      |                  |         | mitochondrial ATP synthesis coupled proton transport           |          |           |         |      |
| GO:0015985                                                   | 3                    | 18                                   | 1.12920216089308e-05 | 87.2727272727273 |         | 0.0448411874610754                                             |          |           |         |      |
|                                                              |                      |                                      |                      |                  |         | energy coupled proton transport, down electrochemical gradient |          |           |         |      |
| GO:0015986                                                   | 3                    | 18                                   | 1.12920216089308e-05 | 87.2727272727273 |         | 0.0448411874610754                                             |          |           |         |      |
|                                                              |                      |                                      |                      |                  |         | ATP synthesis coupled proton transport                         |          |           |         |      |
| GO:0090305                                                   | 4                    | 63                                   | 1.73993115539579e-05 | 30.4152542372881 |         | 0.156944156113764                                              |          |           |         |      |
|                                                              |                      |                                      |                      |                  |         | nucleic acid phosphodiester bond hydrolysis                    |          |           |         |      |
| Tissue: Heart_Left_Ventricle=>Artery_Tibial Type: asymmetric |                      |                                      |                      |                  |         |                                                                |          |           |         |      |
| SourceGene: RP11-385D13.1(ENSG00000251537.2)                 |                      |                                      |                      |                  |         |                                                                |          |           |         |      |
| TargetGeneSet:                                               | RPL11                | RP11                                 | RP4                  | VPS72            | PSMB4   | IAH1                                                           | C2orf28  | COX7A2L   |         |      |
| BTF3L4P2                                                     |                      | RPL32                                | CMC1                 | SPCS1            | RPL24   | NDUFB4                                                         | RPL35A   | WDFY3-AS1 |         |      |
| RPL34                                                        | CHCHD2P2             |                                      | BTF3                 | RPS23            | COX7C   | CTB                                                            | RPS14    | RPS10     | MRPL2   |      |
| PSMB1                                                        | NUDT1                | DCTN6                                | RPS20                | C8orf59          | UQCRB   | RPL30                                                          | VPS13B   | TTC35     | NSMCE2  |      |
| RPS24                                                        | RPL27A               | RPS13                                | TSPAN18              | MRPL11           | ATP5L   | RPS25                                                          | PFDN5    | ATP5G2    | SLC25A3 |      |
| MAPKBP1                                                      | C16orf13             |                                      | RPS15A               | TMEM219          | RPL26   | RPL17                                                          | CTD      | RPS15     | RPL36   |      |
| C19orf53                                                     |                      | EIF3K                                | SNRPD2               | ATP50            | CXorf31 | UXT                                                            | RPS4X    |           |         |      |
| GOBPID                                                       | Pvalue               | OddsRatio                            | ExpCount             | Count            | Size    | Term                                                           |          |           |         |      |
| GO:0006614                                                   | 21                   | 105                                  | 2.78776767256928e-33 | 132.583333333333 |         | 0.348764791363919                                              |          |           |         |      |
|                                                              |                      |                                      |                      |                  |         | SRP-dependent cotranslational protein targeting to membrane    |          |           |         |      |
| GO:0006613                                                   | 21                   | 106                                  | 3.47026825666604e-33 | 131.014379084967 |         | 0.352086360805481                                              |          |           |         |      |
|                                                              |                      |                                      |                      |                  |         | cotranslational protein targeting to membrane                  |          |           |         |      |
| GO:0045047                                                   | 21                   | 106                                  | 3.47026825666604e-33 | 131.014379084967 |         | 0.352086360805481                                              |          |           |         |      |
|                                                              |                      |                                      |                      |                  |         | protein targeting to ER                                        |          |           |         |      |
| GO:0072599                                                   | 21                   | 106                                  | 3.47026825666604e-33 | 131.014379084967 |         | 0.352086360805481                                              |          |           |         |      |
|                                                              |                      |                                      |                      |                  |         | establishment of protein localization to endoplasmic reticulum |          |           |         |      |
| GO:0006415                                                   | 20                   | 91                                   | 1.4981523225137e-32  | 144.185110663984 |         | 0.302262819182064                                              |          |           |         |      |
|                                                              |                      |                                      |                      |                  |         | translational termination                                      |          |           |         |      |
| GO:0070972                                                   | 21                   | 118                                  | 4.06470290988334e-32 | 114.710194730813 |         | 0.391945194104214                                              |          |           |         |      |
|                                                              |                      |                                      |                      |                  |         | protein localization to endoplasmic reticulum                  |          |           |         |      |

Stable4\_20PerPair

|            |                      |                                                                     |                    |    |
|------------|----------------------|---------------------------------------------------------------------|--------------------|----|
| GO:0006414 | 3.52471816938722e-31 | 120.319327731092                                                    | 0.348764791363919  |    |
| 20         | 105                  | translational elongation                                            |                    |    |
| GO:0000184 | 5.34369164096264e-30 | 103.203463203463                                                    | 0.395266763545775  |    |
| 20         | 119                  | nuclear-transcribed mRNA catabolic process, nonsense-mediated decay |                    |    |
| GO:0006413 | 1.21526158742964e-29 | 84.7362171331637                                                    | 0.504878555117293  |    |
| 21         | 152                  | translational initiation                                            |                    |    |
| GO:0006612 | 1.40606205506072e-29 | 84.0883838383838                                                    | 0.508200124558854  |    |
| 21         | 153                  | protein targeting to membrane                                       |                    |    |
| GO:0019080 | 8.58322204781122e-28 | 77.8189749182116                                                    | 0.501556985675732  |    |
| 20         | 151                  | viral genome expression                                             |                    |    |
| GO:0019083 | 8.58322204781122e-28 | 77.8189749182116                                                    | 0.501556985675732  |    |
| 20         | 151                  | viral transcription                                                 |                    |    |
| GO:0043624 | 1.13276567279339e-27 | 76.6380236305048                                                    | 0.508200124558854  |    |
| 20         | 153                  | cellular protein complex disassembly                                |                    |    |
| GO:0043241 | 2.22867395160935e-27 | 73.8354037267081                                                    | 0.52480797176666   |    |
| 20         | 158                  | protein complex disassembly                                         |                    |    |
| GO:0072594 | 7.82600038625716e-27 | 60.4371584699454                                                    | 0.677600166078472  |    |
| 21         | 204                  | establishment of protein localization to organelle                  |                    |    |
| GO:0000956 | 9.1346235840105e-27  | 68.3317353787153                                                    | 0.561345235623832  |    |
| 20         | 169                  | nuclear-transcribed mRNA catabolic process                          |                    |    |
| GO:0034623 | 1.6791184182238e-26  | 66.0899814471243                                                    | 0.577953082831638  |    |
| 20         | 174                  | cellular macromolecular complex disassembly                         |                    |    |
| GO:0006402 | 2.69629863716682e-26 | 64.3987341772152                                                    | 0.591239360597883  |    |
| 20         | 178                  | mRNA catabolic process                                              |                    |    |
| GO:0032984 | 3.0297912127465e-26  | 63.989218328841                                                     | 0.594560930039444  | 20 |
| 179        |                      | macromolecular complex disassembly                                  |                    |    |
| GO:0006401 | 5.02452753202794e-25 | 54.8957528957529                                                    | 0.680921735520033  |    |
| 20         | 205                  | RNA catabolic process                                               |                    |    |
| GO:0019058 | 5.82542280477427e-24 | 48.0433310765064                                                    | 0.767282541000623  |    |
| 20         | 231                  | viral infectious cycle                                              |                    |    |
| GO:0022415 | 6.47182437736391e-23 | 42.1517857142857                                                    | 0.863608054805896  |    |
| 20         | 260                  | viral reproductive process                                          |                    |    |
| GO:0071845 | 3.8594136907233e-22  | 38.2548701298701                                                    | 0.943325721403363  |    |
| 20         | 284                  | cellular component disassembly at cellular level                    |                    |    |
| GO:0022411 | 5.11642205134461e-22 | 37.6732409381663                                                    | 0.956611999169608  |    |
| 20         | 288                  | cellular component disassembly                                      |                    |    |
| GO:0016032 | 5.84405441841655e-21 | 27.5621301775148                                                    | 1.49802781814407   |    |
| 22         | 451                  | viral reproduction                                                  |                    |    |
| GO:0033365 | 4.14480729927265e-19 | 24.006145526057                                                     | 1.57110234585842   | 21 |
| 473        |                      | protein localization to organelle                                   |                    |    |
| GO:0006605 | 4.3289800511741e-19  | 23.9514348785872                                                    | 1.57442391529998   |    |
| 21         | 474                  | protein targeting                                                   |                    |    |
| GO:0022613 | 4.53557893831128e-08 | 15.1570512820513                                                    | 0.747353124351256  |    |
| 9          | 225                  | ribonucleoprotein complex biogenesis                                |                    |    |
| GO:0071843 | 7.61773941984215e-08 | 14.2204013377926                                                    | 0.793855096533112  |    |
| 9          | 239                  | cellular component biogenesis at cellular level                     |                    |    |
| GO:0042274 | 3.168047146843e-07   | 93.4350649350649                                                    | 0.0597882499481005 |    |
| 4          | 18                   | ribosomal small subunit biogenesis                                  |                    |    |
| GO:0042254 | 5.55893644049581e-07 | 17.1465132256956                                                    | 0.49491384679261   |    |
| 7          | 149                  | ribosome biogenesis                                                 |                    |    |
| GO:0022904 | 7.19167981058667e-07 | 22.7190476190476                                                    | 0.318870666389869  |    |
| 6          | 96                   | respiratory electron transport chain                                |                    |    |
| GO:0006364 | 1.15384517465125e-06 | 20.8527696793003                                                    | 0.345443221922358  |    |
| 6          | 104                  | rRNA processing                                                     |                    |    |
| GO:0016072 | 1.60448419455537e-06 | 19.6414835164835                                                    | 0.365372638571725  |    |
| 6          | 110                  | rRNA metabolic process                                              |                    |    |
| GO:0022900 | 5.06430411526244e-06 | 15.9319196428571                                                    | 0.445090305169192  |    |
| 6          | 134                  | electron transport chain                                            |                    |    |
| GO:0045333 | 7.07551797530415e-06 | 14.9863445378151                                                    | 0.471662860701682  |    |
| 6          | 142                  | cellular respiration                                                |                    |    |
| GO:0042273 | 7.40932461213239e-06 | 106.622222222222                                                    | 0.0398588332987337 |    |
| 3          | 12                   | ribosomal large subunit biogenesis                                  |                    |    |

Tissue: Heart\_Left\_Ventricle=>Artery\_Tibial Type: cluster

Stable4\_20PerPair

| SourceGene:    | RP11-385D13.1(ENSG00000251537.2) |           |                      |                  |         |                                                                     |           |         |                      |
|----------------|----------------------------------|-----------|----------------------|------------------|---------|---------------------------------------------------------------------|-----------|---------|----------------------|
| TargetGeneSet: | RPL11                            | RP11      | RP4                  | VPS72            | PSMB4   | IAH1                                                                | C2orf28   | COX7A2L |                      |
| BTF3L4P2       | RPL32                            | CMC1      | SPCS1                | RPL24            | NDUFB4  | RPL35A                                                              | WDFY3-AS1 |         |                      |
| RPL34          | CHCHD2P2                         | BTF3      | RPS23                | COX7C            | CTB     | RPS14                                                               | RPS10     | MRPL2   |                      |
| PSMB1          | NUDT1                            | DCTN6     | RPS20                | C8orf59          | UQCRB   | RPL30                                                               | VPS13B    | TTC35   | NSMCE2               |
| RPS24          | RPL27A                           | RPS13     | TSPAN18              | MRPL11           | ATP5L   | RPS25                                                               | PFDN5     | ATP5G2  | SLC25A3              |
| MAPKBP1        | C16orf13                         |           | RPS15A               | TMEM219          | RPL26   | RPL17                                                               | CTD       | RPS15   | RPL36                |
| C19orf53       |                                  | EIF3K     | SNRPD2               | ATP5O            | CXorf31 | UXT                                                                 | RPS4X     |         |                      |
| GOBPID         | Pvalue                           | OddsRatio | ExpCount             | Count            | Size    | Term                                                                |           |         |                      |
| GO:0006614     | 21                               | 105       | 2.78776767256928e-33 | 132.583333333333 |         | SRP-dependent cotranslational protein targeting to membrane         |           |         | 0.348764791363919    |
| GO:0006613     | 21                               | 106       | 3.47026825666604e-33 | 131.014379084967 |         | cotranslational protein targeting to membrane                       |           |         | 0.352086360805481    |
| GO:0045047     | 21                               | 106       | 3.47026825666604e-33 | 131.014379084967 |         | protein targeting to ER                                             |           |         | 0.352086360805481    |
| GO:0072599     | 21                               | 106       | 3.47026825666604e-33 | 131.014379084967 |         | establishment of protein localization to endoplasmic reticulum      |           |         | 0.352086360805481    |
| GO:0006415     | 20                               | 91        | 1.4981523225137e-32  | 144.185110663984 |         | translational termination                                           |           |         | 0.302262819182064    |
| GO:0070972     | 21                               | 118       | 4.06470290988334e-32 | 114.710194730813 |         | protein localization to endoplasmic reticulum                       |           |         | 0.391945194104214    |
| GO:0006414     | 20                               | 105       | 3.52471816938722e-31 | 120.319327731092 |         | translational elongation                                            |           |         | 0.348764791363919    |
| GO:0000184     | 20                               | 119       | 5.34369164096264e-30 | 103.203463203463 |         | nuclear-transcribed mRNA catabolic process, nonsense-mediated decay |           |         | 0.395266763545775    |
| GO:0006413     | 21                               | 152       | 1.21526158742964e-29 | 84.7362171331637 |         | translational initiation                                            |           |         | 0.504878555117293    |
| GO:0006612     | 21                               | 153       | 1.40606205506072e-29 | 84.0883838383838 |         | protein targeting to membrane                                       |           |         | 0.508200124558854    |
| GO:0019080     | 20                               | 151       | 8.58322204781122e-28 | 77.8189749182116 |         | viral genome expression                                             |           |         | 0.501556985675732    |
| GO:0019083     | 20                               | 151       | 8.58322204781122e-28 | 77.8189749182116 |         | viral transcription                                                 |           |         | 0.501556985675732    |
| GO:0043624     | 20                               | 153       | 1.13276567279339e-27 | 76.6380236305048 |         | cellular protein complex disassembly                                |           |         | 0.508200124558854    |
| GO:0043241     | 20                               | 158       | 2.22867395160935e-27 | 73.8354037267081 |         | protein complex disassembly                                         |           |         | 0.52480797176666     |
| GO:0072594     | 21                               | 204       | 7.82600038625716e-27 | 60.4371584699454 |         | establishment of protein localization to organelle                  |           |         | 0.677600166078472    |
| GO:0000956     | 20                               | 169       | 9.1346235840105e-27  | 68.3317353787153 |         | nuclear-transcribed mRNA catabolic process                          |           |         | 0.561345235623832    |
| GO:0034623     | 20                               | 174       | 1.6791184182238e-26  | 66.0899814471243 |         | cellular macromolecular complex disassembly                         |           |         | 0.577953082831638    |
| GO:0006402     | 20                               | 178       | 2.69629863716682e-26 | 64.3987341772152 |         | mRNA catabolic process                                              |           |         | 0.591239360597883    |
| GO:0032984     | 179                              | 451       | 3.0297912127465e-26  | 63.989218328841  |         | macromolecular complex disassembly                                  |           |         | 0.594560930039444 20 |
| GO:0006401     | 20                               | 205       | 5.02452753202794e-25 | 54.8957528957529 |         | RNA catabolic process                                               |           |         | 0.680921735520033    |
| GO:0019058     | 20                               | 231       | 5.82542280477427e-24 | 48.0433310765064 |         | viral infectious cycle                                              |           |         | 0.767282541000623    |
| GO:0022415     | 20                               | 260       | 6.47182437736391e-23 | 42.1517857142857 |         | viral reproductive process                                          |           |         | 0.863608054805896    |
| GO:0071845     | 20                               | 284       | 3.8594136907233e-22  | 38.2548701298701 |         | cellular component disassembly at cellular level                    |           |         | 0.943325721403363    |
| GO:0022411     | 20                               | 288       | 5.11642205134461e-22 | 37.6732409381663 |         | cellular component disassembly                                      |           |         | 0.956611999169608    |
| GO:0016032     | 22                               | 451       | 5.84405441841655e-21 | 27.5621301775148 |         | viral reproduction                                                  |           |         | 1.49802781814407     |
| GO:0033365     | 473                              | 474       | 4.14480729927265e-19 | 24.006145526057  |         | protein localization to organelle                                   |           |         | 1.57110234585842 21  |
| GO:0006605     | 21                               | 474       | 4.3289800511741e-19  | 23.9514348785872 |         | protein targeting                                                   |           |         | 1.57442391529998     |

Stable4\_20PerPair

|                                                           |                      |                                                 |                      |                                           |                                                                |
|-----------------------------------------------------------|----------------------|-------------------------------------------------|----------------------|-------------------------------------------|----------------------------------------------------------------|
| GO:0022613                                                | 4.53557893831128e-08 | 15.1570512820513                                | 0.747353124351256    |                                           |                                                                |
| 9                                                         | 225                  | ribonucleoprotein complex biogenesis            |                      |                                           |                                                                |
| GO:0071843                                                | 7.61773941984215e-08 | 14.2204013377926                                | 0.793855096533112    |                                           |                                                                |
| 9                                                         | 239                  | cellular component biogenesis at cellular level |                      |                                           |                                                                |
| GO:0042274                                                | 3.168047146843e-07   | 93.4350649350649                                | 0.0597882499481005   |                                           |                                                                |
| 4                                                         | 18                   | ribosomal small subunit biogenesis              |                      |                                           |                                                                |
| GO:0042254                                                | 5.55893644049581e-07 | 17.1465132256956                                | 0.49491384679261     |                                           |                                                                |
| 7                                                         | 149                  | ribosome biogenesis                             |                      |                                           |                                                                |
| GO:0022904                                                | 7.19167981058667e-07 | 22.7190476190476                                | 0.318870666389869    |                                           |                                                                |
| 6                                                         | 96                   | respiratory electron transport chain            |                      |                                           |                                                                |
| GO:0006364                                                | 1.15384517465125e-06 | 20.8527696793003                                | 0.345443221922358    |                                           |                                                                |
| 6                                                         | 104                  | rRNA processing                                 |                      |                                           |                                                                |
| GO:0016072                                                | 1.60448419455537e-06 | 19.6414835164835                                | 0.365372638571725    |                                           |                                                                |
| 6                                                         | 110                  | rRNA metabolic process                          |                      |                                           |                                                                |
| GO:0022900                                                | 5.06430411526244e-06 | 15.9319196428571                                | 0.445090305169192    |                                           |                                                                |
| 6                                                         | 134                  | electron transport chain                        |                      |                                           |                                                                |
| GO:0045333                                                | 7.07551797530415e-06 | 14.9863445378151                                | 0.471662860701682    |                                           |                                                                |
| 6                                                         | 142                  | cellular respiration                            |                      |                                           |                                                                |
| GO:0042273                                                | 7.40932461213239e-06 | 106.622222222222                                | 0.0398588332987337   |                                           |                                                                |
| 3                                                         | 12                   | ribosomal large subunit biogenesis              |                      |                                           |                                                                |
| Tissue: Heart_Left_Ventricle=>Artery_Tibial Type: cluster |                      |                                                 |                      |                                           |                                                                |
| SourceGene: RP11-602.3(ENSG00000261616.1)                 |                      |                                                 |                      |                                           |                                                                |
| TargetGeneSet:                                            | MEGF6                | ATPIF1                                          | SNORA16A             | SNRNP40 TCHH EIF5B PAX8                   |                                                                |
| FMNL2                                                     | EEF1B2               | RPL37A                                          | RPL32                | LSM3 KIF9 RP11 CCDC72 MRPS18C LARP7       |                                                                |
| RPL37                                                     | RPS23                | CTB                                             | MRPL2                | C6orf203 C7orf50 TOMM7 CPVL TRGV10 ECD    |                                                                |
| ATP5J2                                                    | PMS2P1               | SSBP1                                           | BRF2                 | NDUFB9 LINC00032 FXN RPL35 MRC1           |                                                                |
| RPL13AP5                                                  |                      | IMMP1L                                          | MS4A7                | CTD FAU BARX2 PSMC1P9 SAP18 RPL13AP25     |                                                                |
| STK24-AS1                                                 |                      | RPS29                                           | SLIRP                | NDUFB1 IGHV3-7 HMG2P5 MEFV UBE2MP1 MTHFSD |                                                                |
| TRAPPC2L                                                  |                      | RPL38                                           | PPP4R1               | SERPINB7 C19orf70 COX6B1 NDUFA3           |                                                                |
| PSMF1                                                     | RPS21                | SNRPD3                                          | POLR2F               | TOMM22 RRP7A PARVG RP6 EEF1B2P3           |                                                                |
| RGAG1                                                     | NDUFA1               |                                                 |                      | RP13                                      |                                                                |
| GOBPID                                                    | Pvalue               | OddsRatio                                       | ExpCount             | Count Size Term                           |                                                                |
| GO:0006414                                                | 10                   | 105                                             | 3.98314419680397e-12 | 35.0134638922889                          | 0.385094457130994                                              |
|                                                           |                      |                                                 |                      |                                           | translational elongation                                       |
| GO:0000956                                                | 11                   | 169                                             | 2.01102768541235e-11 | 23.6045810729355                          | 0.619818697667981                                              |
|                                                           |                      |                                                 |                      |                                           | nuclear-transcribed mRNA catabolic process                     |
| GO:0006402                                                | 11                   | 178                                             | 3.53363687110955e-11 | 22.3183632734531                          | 0.652826793993495                                              |
|                                                           |                      |                                                 |                      |                                           | mRNA catabolic process                                         |
| GO:0006415                                                | 9                    | 91                                              | 3.66938032653629e-11 | 35.7106430155211                          | 0.333748529513528                                              |
|                                                           |                      |                                                 |                      |                                           | translational termination                                      |
| GO:0006614                                                | 9                    | 105                                             | 1.35366372521252e-10 | 30.4730113636364                          | 0.385094457130994                                              |
|                                                           |                      |                                                 |                      |                                           | SRP-dependent cotranslational protein targeting to membrane    |
| GO:0006613                                                | 106                  |                                                 | 1.4751918093616e-10  | 30.156747891284                           | 0.388762023389385 9                                            |
|                                                           |                      |                                                 |                      |                                           | cotranslational protein targeting to membrane                  |
| GO:0045047                                                | 106                  |                                                 | 1.4751918093616e-10  | 30.156747891284                           | 0.388762023389385 9                                            |
|                                                           |                      |                                                 |                      |                                           | protein targeting to ER                                        |
| GO:0072599                                                | 106                  |                                                 | 1.4751918093616e-10  | 30.156747891284                           | 0.388762023389385 9                                            |
|                                                           |                      |                                                 |                      |                                           | establishment of protein localization to endoplasmic reticulum |
| GO:0019080                                                | 10                   | 151                                             | 1.52571484891548e-10 | 23.5147616691407                          | 0.553802505016954                                              |
|                                                           |                      |                                                 |                      |                                           | viral genome expression                                        |
| GO:0019083                                                | 10                   | 151                                             | 1.52571484891548e-10 | 23.5147616691407                          | 0.553802505016954                                              |
|                                                           |                      |                                                 |                      |                                           | viral transcription                                            |
| GO:0072594                                                | 11                   | 204                                             | 1.53781885538094e-10 | 19.2764618800888                          | 0.748183516711646                                              |
|                                                           |                      |                                                 |                      |                                           | establishment of protein localization to organelle             |
| GO:0006401                                                | 11                   | 205                                             | 1.62064477386812e-10 | 19.1757486499755                          | 0.751851082970037                                              |
|                                                           |                      |                                                 |                      |                                           | RNA catabolic process                                          |
| GO:0006413                                                | 10                   | 152                                             | 1.62871361935406e-10 | 23.3475270226007                          | 0.557470071275344                                              |
|                                                           |                      |                                                 |                      |                                           | translational initiation                                       |
| GO:0006612                                                | 10                   | 153                                             | 1.73786559763246e-10 | 23.1826313221662                          | 0.561137637533735                                              |
|                                                           |                      |                                                 |                      |                                           | protein targeting to membrane                                  |
| GO:0070972                                                | 9                    | 118                                             | 3.8857989319948e-10  | 26.8142201834862                          | 0.43277281849007                                               |
|                                                           |                      |                                                 |                      |                                           | protein localization to endoplasmic reticulum                  |
| GO:0000184                                                |                      |                                                 | 4.19215804296945e-10 | 26.5685950413223                          | 0.43644038474846                                               |

Stable4\_20PerPair

|                                                              |         |                                                                     |                  |          |                   |          |          |                   |            |
|--------------------------------------------------------------|---------|---------------------------------------------------------------------|------------------|----------|-------------------|----------|----------|-------------------|------------|
| 9                                                            | 119     | nuclear-transcribed mRNA catabolic process, nonsense-mediated decay |                  |          |                   |          |          |                   |            |
| GO:0043624                                                   |         | 3.93107983477693e-09                                                | 20.2471590909091 |          |                   |          |          | 0.561137637533735 |            |
| 9                                                            | 153     | cellular protein complex disassembly                                |                  |          |                   |          |          |                   |            |
| GO:0043241                                                   |         | 5.21875967628323e-09                                                | 19.5608602806589 |          |                   |          |          | 0.579475468825687 |            |
| 9                                                            | 158     | protein complex disassembly                                         |                  |          |                   |          |          |                   |            |
| GO:0019058                                                   |         | 9.58092578263479e-09                                                | 14.9184468062717 |          |                   |          |          | 0.847207805688188 |            |
| 10                                                           | 231     | viral infectious cycle                                              |                  |          |                   |          |          |                   |            |
| GO:0034623                                                   |         | 1.21573298519984e-08                                                | 17.6442148760331 |          |                   |          |          | 0.638156528959934 |            |
| 9                                                            | 174     | cellular macromolecular complex disassembly                         |                  |          |                   |          |          |                   |            |
| GO:0032984                                                   |         | 1.5565729221242e-08                                                 | 17.1192513368984 |          |                   |          |          | 0.656494360251886 |            |
| 9                                                            | 179     | macromolecular complex disassembly                                  |                  |          |                   |          |          |                   |            |
| GO:0022415                                                   |         | 2.95291480224285e-08                                                | 13.1609302325581 |          |                   |          |          | 0.95356722718151  |            |
| 10                                                           | 260     | viral reproductive process                                          |                  |          |                   |          |          |                   |            |
| GO:0016032                                                   |         | 5.65316012502317e-07                                                | 8.30833333333333 |          |                   |          |          | 1.65407238253408  |            |
| 11                                                           | 451     | viral reproduction                                                  |                  |          |                   |          |          |                   |            |
| GO:0071845                                                   |         | 8.00505984618337e-07                                                | 10.5047107438017 |          |                   |          |          | 1.04158881738288  |            |
| 9                                                            | 284     | cellular component disassembly at cellular level                    |                  |          |                   |          |          |                   |            |
| GO:0045333                                                   |         | 8.05893126774758e-07                                                | 16.0774557165862 |          |                   |          |          | 0.52079440869144  |            |
| 7                                                            | 142     | cellular respiration                                                |                  |          |                   |          |          |                   |            |
| GO:0022411                                                   |         | 8.99494055057545e-07                                                | 10.3511730205279 |          |                   |          |          | 1.05625908241644  |            |
| 9                                                            | 288     | cellular component disassembly                                      |                  |          |                   |          |          |                   |            |
| GO:0033365                                                   |         | 9.04296479496618e-07                                                | 7.90022675736961 |          |                   |          |          | 1.73475884021867  |            |
| 11                                                           | 473     | protein localization to organelle                                   |                  |          |                   |          |          |                   |            |
| GO:0006605                                                   |         | 9.23262607950261e-07                                                | 7.88259796359148 |          |                   |          |          | 1.73842640647706  |            |
| 11                                                           | 474     | protein targeting                                                   |                  |          |                   |          |          |                   |            |
| GO:0022904                                                   |         | 1.30995586247285e-06                                                | 20.2950354609929 |          |                   |          |          | 0.352086360805481 |            |
| 6                                                            | 96      | respiratory electron transport chain                                |                  |          |                   |          |          |                   |            |
| GO:0006119                                                   |         | 2.16324166921229e-06                                                | 28.1937893081761 |          |                   |          |          | 0.212718842986645 |            |
| 5                                                            | 58      | oxidative phosphorylation                                           |                  |          |                   |          |          |                   |            |
| GO:0006120                                                   |         | 8.7062961231538e-06                                                 | 36.6479591836735 |          |                   |          |          | 0.132032385302055 |            |
| 4                                                            | 36      | mitochondrial electron transport, NADH to ubiquinone                |                  |          |                   |          |          |                   |            |
| GO:0022900                                                   |         | 9.12150819894347e-06                                                | 14.2320478723404 |          |                   |          |          | 0.491453878624317 |            |
| 6                                                            | 134     | electron transport chain                                            |                  |          |                   |          |          |                   |            |
| Tissue: Heart_Left_Ventricle=>Artery_Tibial Type: asymmetric |         |                                                                     |                  |          |                   |          |          |                   |            |
| SourceGene: RP11-881M11.4(ENSG00000256196.1)                 |         |                                                                     |                  |          |                   |          |          |                   |            |
| TargetGeneSet:                                               | RP1     | PPIH                                                                | RP11             | RP4      | HSD3BP5           | MRPS21   | PSMB4    | S100A6            | PMF1       |
| ACBD6                                                        | DHX9    | NENF                                                                | RPS7             | ROCK2    | GTF3C2            | MCEE     | EXOC6B   | DGUOK             | RNF181     |
| RPL31                                                        | MAP4K4  | SMARCAL1                                                            |                  | HDLBP    | THUMP3            | RPL32    | TBC1D5   | THR3-IT1          |            |
| TMEM89                                                       | VPRBP   | SPCS1                                                               | NDUFB4           | ZBTB38   | UBQLN4P1          |          | UBE2V1P2 |                   | RPL35A     |
| TMEM128                                                      | RPL34   | EXOSC9                                                              | NDUFC1           | FRG1     | CDK7              | COL4A3BP | CTD      |                   | MAN2A1 PDF |
| ATOX1                                                        | RPL26L1 | HIVEP1                                                              | APOM             | CSNK2B   | TAF11             | PEX6     | MRPL2    | C6orf72           | ARID1B     |
| C6orf70                                                      | PSMB1   | CHCHD2                                                              | SBDS             | NSUN5    | TRRAP             | C7orf59  | PMS2P1   | FIS1              | SH2B2      |
| ST7-AS1                                                      | ARF5    | KAT6A                                                               | C8orf40          | RPL10AP2 |                   | CHCHD7   | C8orf59  | RBM12B            | DCTN3      |
| SEC61B                                                       | STX17   | AKAP2                                                               | KIF20B           | FAM204A  | METTL10           | TMEM80   | RPL27A   | RPS13             | POLR2G     |
| OTUB1                                                        | KLC2    | GAL                                                                 | ATP5L            | DAZAP2   | WIBG              | SSH1     | RPS7P10  | MED4-AS1          |            |
| FANCM                                                        | RPS29   | TCF12                                                               | COMMD4           | CPEB1    | KIF22             | DDX19B   | ZNF18    | C17orf108         |            |
| PGAP3                                                        | RPL27   | MRPS23                                                              | BRIP1            | C17orf90 |                   | C18orf21 |          | C19orf79          | BRD4       |
| ZNF226                                                       | SNRPD2  | RPS11                                                               | C19orf48         |          | ZNF611            | NLRP9    | TRAPPC2  | ZNF530            | ZNF552     |
| ZNF256                                                       | MT1P3   | MMP24                                                               | SNHG11           | IFT52    | SLC35C2           | USP16    | IGLV1-41 | EBP               | RBM3       |
| GOBPID                                                       | Pvalue  | OddsRatio                                                           | ExpCount         |          | Count             | Size     | Term     |                   |            |
| GO:0006614                                                   |         | 1.01827296410455e-13                                                | 25.518849752339  |          | 0.668465850114179 |          |          |                   | 13         |
| 105                                                          |         | SRP-dependent cotranslational protein targeting to membrane         |                  |          |                   |          |          |                   |            |
| GO:0006613                                                   |         | 1.15469488928884e-13                                                | 25.2426840887437 |          | 0.674832191543838 |          |          |                   |            |
| 13                                                           | 106     | cotranslational protein targeting to membrane                       |                  |          |                   |          |          |                   |            |
| GO:0045047                                                   |         | 1.15469488928884e-13                                                | 25.2426840887437 |          | 0.674832191543838 |          |          |                   |            |
| 13                                                           | 106     | protein targeting to ER                                             |                  |          |                   |          |          |                   |            |
| GO:0072599                                                   |         | 1.15469488928884e-13                                                | 25.2426840887437 |          | 0.674832191543838 |          |          |                   |            |
| 13                                                           | 106     | establishment of protein localization to endoplasmic reticulum      |                  |          |                   |          |          |                   |            |
| GO:0070972                                                   |         | 4.74744411074256e-13                                                | 22.3389993972272 |          | 0.751228288699744 |          |          |                   |            |
| 13                                                           | 118     | protein localization to endoplasmic reticulum                       |                  |          |                   |          |          |                   |            |
| GO:0019080                                                   |         | 6.29003231242625e-13                                                | 18.632603406326  |          | 0.961317555878486 |          |          |                   | 14         |
| 151                                                          |         | viral genome expression                                             |                  |          |                   |          |          |                   |            |
| GO:0019083                                                   |         | 6.29003231242625e-13                                                | 18.632603406326  |          | 0.961317555878486 |          |          |                   | 14         |

STable4\_20PerPair

|                                             |                     |                                                                     |                  |                  |      |                   |  |                   |     |
|---------------------------------------------|---------------------|---------------------------------------------------------------------|------------------|------------------|------|-------------------|--|-------------------|-----|
| 151                                         | viral transcription |                                                                     |                  |                  |      |                   |  |                   |     |
| GO:0000184                                  |                     | 1.15281512984895e-11                                                | 19.9794392523364 |                  |      |                   |  | 0.757594630129403 |     |
| 12                                          | 119                 | nuclear-transcribed mRNA catabolic process, nonsense-mediated decay |                  |                  |      |                   |  |                   |     |
| GO:0006415                                  |                     | 1.175221973048e-11                                                  | 24.2390432098765 |                  |      |                   |  | 0.579337070098955 |     |
| 11                                          | 91                  | translational termination                                           |                  |                  |      |                   |  |                   |     |
| GO:0006612                                  |                     | 1.36550618939728e-11                                                | 16.7131103074141 |                  |      |                   |  | 0.974050238737804 |     |
| 13                                          | 153                 | protein targeting to membrane                                       |                  |                  |      |                   |  |                   |     |
| GO:0072594                                  |                     | 3.82294072612714e-11                                                | 13.385020242915  | 1.2987336516504  | 14   |                   |  |                   | 204 |
|                                             |                     | establishment of protein localization to organelle                  |                  |                  |      |                   |  |                   |     |
| GO:0000956                                  |                     | 4.82346741374753e-11                                                | 14.9820675105485 |                  |      |                   |  | 1.07591170161235  |     |
| 13                                          | 169                 | nuclear-transcribed mRNA catabolic process                          |                  |                  |      |                   |  |                   |     |
| GO:0006414                                  |                     | 5.7552382341731e-11                                                 | 20.6087470449173 |                  |      |                   |  | 0.668465850114179 |     |
| 11                                          | 105                 | translational elongation                                            |                  |                  |      |                   |  |                   |     |
| GO:0006402                                  |                     | 9.26646282702262e-11                                                | 14.1558879938627 |                  |      |                   |  | 1.13320877447927  |     |
| 13                                          | 178                 | mRNA catabolic process                                              |                  |                  |      |                   |  |                   |     |
| GO:0019058                                  |                     | 2.00447753500612e-10                                                | 11.697270471464  | 1.47062487025119 |      |                   |  |                   | 14  |
| 231                                         |                     | viral infectious cycle                                              |                  |                  |      |                   |  |                   |     |
| GO:0043624                                  |                     | 2.25052217805629e-10                                                | 15.1255319148936 |                  |      |                   |  | 0.974050238737804 |     |
| 12                                          | 153                 | cellular protein complex disassembly                                |                  |                  |      |                   |  |                   |     |
| GO:0043241                                  |                     | 3.27283440030383e-10                                                | 14.602397260274  | 1.0058819458861  | 12   |                   |  |                   | 158 |
|                                             |                     | protein complex disassembly                                         |                  |                  |      |                   |  |                   |     |
| GO:0006401                                  |                     | 5.37465029970302e-10                                                | 12.1420754219409 |                  |      |                   |  | 1.30509999308006  |     |
| 13                                          | 205                 | RNA catabolic process                                               |                  |                  |      |                   |  |                   |     |
| GO:0022415                                  |                     | 9.47557506538276e-10                                                | 10.2971648947259 |                  |      |                   |  | 1.6552487717113   | 14  |
| 260                                         |                     | viral reproductive process                                          |                  |                  |      |                   |  |                   |     |
| GO:0034623                                  |                     | 9.98440746345093e-10                                                | 13.1453703703704 |                  |      |                   |  | 1.10774340876064  |     |
| 12                                          | 174                 | cellular macromolecular complex disassembly                         |                  |                  |      |                   |  |                   |     |
| GO:0032984                                  |                     | 1.38225142147504e-09                                                | 12.7473053892216 |                  |      |                   |  | 1.13957511590893  |     |
| 12                                          | 179                 | macromolecular complex disassembly                                  |                  |                  |      |                   |  |                   |     |
| GO:0016032                                  |                     | 3.06268020579448e-09                                                | 7.2726574500768  | 2.87121998477614 |      |                   |  |                   | 17  |
| 451                                         |                     | viral reproduction                                                  |                  |                  |      |                   |  |                   |     |
| GO:0006413                                  |                     | 3.13538362690941e-09                                                | 13.6938972068996 |                  |      |                   |  | 0.967683897308145 |     |
| 11                                          | 152                 | translational initiation                                            |                  |                  |      |                   |  |                   |     |
| GO:0071845                                  |                     | 2.3556966040621e-07                                                 | 7.76856617647059 |                  |      |                   |  | 1.80804096602311  |     |
| 12                                          | 284                 | cellular component disassembly at cellular level                    |                  |                  |      |                   |  |                   |     |
| GO:0022411                                  |                     | 2.73821998260101e-07                                                | 7.65380434782609 |                  |      |                   |  | 1.83350633174175  |     |
| 12                                          | 288                 | cellular component disassembly                                      |                  |                  |      |                   |  |                   |     |
| GO:0033365                                  |                     | 1.62631130964055e-06                                                | 5.43545053348975 |                  |      |                   |  | 3.01127949622863  |     |
| 14                                          | 473                 | protein localization to organelle                                   |                  |                  |      |                   |  |                   |     |
| GO:0006605                                  |                     | 1.66720723715982e-06                                                | 5.42324414715719 |                  |      |                   |  | 3.01764583765829  |     |
| 14                                          | 474                 | protein targeting                                                   |                  |                  |      |                   |  |                   |     |
| Tissue: Heart_Left_Ventricle=>Artery_Tibial |                     | Type:                                                               | cluster          |                  |      |                   |  |                   |     |
| SourceGene:                                 |                     | RP4-631H13.6(ENSG00000230953.1)                                     |                  |                  |      |                   |  |                   |     |
| TargetGeneSet:                              |                     | RPL22 RPL11 TRAPPC3 MED8 RP11 RP4 CTSS RPS27 DPM3                   |                  |                  |      |                   |  |                   |     |
| RPS7                                        | UBC                 | MITD1 RAMP1 RPL29 KCTD6 RPL35A TACC3 GRPEL1 RPL34                   |                  |                  |      |                   |  |                   |     |
| RPS3A                                       | ZCCHC9              | UBE2D2 CTB HMMR PRELID1 PRL C2 RPS10 RPL10A RPF2                    |                  |                  |      |                   |  |                   |     |
| RPS3AP26                                    |                     | C7orf59 FNTA FBXL6 RPS6 TUSC1 SWI5 RPS3AP5 KAZALD1                  |                  |                  |      |                   |  |                   |     |
| FBXL15                                      | C10orf137           | RPL27A RPS13 FAU CCDC85B TMEM126A EMG1 RPL6                         |                  |                  |      |                   |  |                   |     |
| LINC00417                                   |                     | POMP ERH FMN1 RPS3AP6 NUBP2 RPS15A NSMCE1 BCL7C CTU2                |                  |                  |      |                   |  |                   |     |
| RPL26                                       | RPL23A              | RPL17 KRT13 GOSR2 CTD RPL36 RYR1 RPS16 RPL18                        |                  |                  |      |                   |  |                   |     |
| ZNF133                                      | RANBP1              | UXT                                                                 |                  |                  |      |                   |  |                   |     |
| GOBPID                                      | Pvalue              | OddsRatio                                                           | ExpCount         | Count            | Size | Term              |  |                   |     |
| GO:0006415                                  |                     | 3.68277265270592e-36                                                | 127.479102167183 |                  |      | 0.384125666043872 |  |                   |     |
| 23                                          | 91                  | translational termination                                           |                  |                  |      |                   |  |                   |     |
| GO:0006414                                  |                     | 1.48312179992786e-34                                                | 105.611039794608 |                  |      | 0.443221922358314 |  |                   |     |
| 23                                          | 105                 | translational elongation                                            |                  |                  |      |                   |  |                   |     |
| GO:0006614                                  |                     | 1.48312179992786e-34                                                | 105.611039794608 |                  |      | 0.443221922358314 |  |                   |     |
| 23                                          | 105                 | SRP-dependent cotranslational protein targeting to membrane         |                  |                  |      |                   |  |                   |     |
| GO:0006613                                  |                     | 1.88930212116187e-34                                                | 104.331325301205 |                  |      | 0.447443083523632 |  |                   |     |
| 23                                          | 106                 | cotranslational protein targeting to membrane                       |                  |                  |      |                   |  |                   |     |
| GO:0045047                                  |                     | 1.88930212116187e-34                                                | 104.331325301205 |                  |      | 0.447443083523632 |  |                   |     |
| 23                                          | 106                 | protein targeting to ER                                             |                  |                  |      |                   |  |                   |     |
| GO:0072599                                  |                     | 1.88930212116187e-34                                                | 104.331325301205 |                  |      | 0.447443083523632 |  |                   |     |



Stable4\_20PerPair

|                                                            |          |                                                                     |                      |                  |                    |    |
|------------------------------------------------------------|----------|---------------------------------------------------------------------|----------------------|------------------|--------------------|----|
| 23                                                         | 106      | establishment of protein localization to endoplasmic reticulum      | 2.86047310536738e-33 | 91.0761772853186 | 0.498097017507439  |    |
| GO:0070972                                                 |          | protein localization to endoplasmic reticulum                       | 3.53679202202736e-33 | 90.1211622807018 | 0.502318178672756  |    |
| 23                                                         | 118      | nuclear-transcribed mRNA catabolic process, nonsense-mediated decay | 1.2975108437028e-30  | 67.4395559210526 | 0.637395335962909  |    |
| GO:000184                                                  |          | viral genome expression                                             | 1.2975108437028e-30  | 67.4395559210526 | 0.637395335962909  |    |
| 23                                                         | 119      | viral transcription                                                 | 1.52496023742732e-30 | 66.9120767033864 | 0.641616497128226  |    |
| GO:0019080                                                 |          | translational initiation                                            | 1.79019432167935e-30 | 66.3927125506073 | 0.645837658293544  |    |
| 23                                                         | 151      | protein targeting to membrane                                       | 1.79019432167935e-30 | 66.3927125506073 | 0.645837658293544  |    |
| GO:0019083                                                 |          | cellular protein complex disassembly                                | 3.92432840569913e-30 | 63.911306042885  | 0.66694346412013   | 23 |
| 23                                                         | 151      | protein complex disassembly                                         | 2.01266739516958e-29 | 59.0504686373468 | 0.71337623693862   |    |
| GO:0006413                                                 |          | nuclear-transcribed mRNA catabolic process                          | 3.72057301998404e-29 | 51.2072072072072 | 0.861116877724725  |    |
| 23                                                         | 152      | establishment of protein localization to organelle                  | 4.07350845599307e-29 | 57.0751132798885 | 0.734482042765207  |    |
| GO:0006612                                                 |          | cellular macromolecular complex disassembly                         | 7.04843933636908e-29 | 55.5865874363328 | 0.751366687426476  |    |
| 23                                                         | 153      | mRNA catabolic process                                              | 8.06702076175517e-29 | 55.226383265857  | 0.755587848591793  | 23 |
| GO:0043624                                                 |          | macromolecular complex disassembly                                  | 2.07564556529311e-27 | 47.2504337767496 | 0.865338038890042  |    |
| 23                                                         | 153      | RNA catabolic process                                               | 3.51439709011963e-26 | 41.268471659919  | 0.975088229188292  | 23 |
| GO:0043241                                                 |          | viral infectious cycle                                              | 1.2870944248384e-25  | 35.2515592515593 | 1.19880977095011   |    |
| 158                                                        | protein  | cellular component disassembly at cellular level                    | 1.80817577907636e-25 | 34.7076167076167 | 1.21569441561138   |    |
| GO:0000956                                                 |          | cellular component disassembly                                      | 5.64206211747876e-25 | 36.1446813235621 | 1.09750190298249   |    |
| 23                                                         | 174      | viral reproductive process                                          | 5.24664523475711e-23 | 23.1714924896133 | 1.99660923119507   |    |
| GO:0072594                                                 |          | protein localization to organelle                                   | 5.53778955384153e-23 | 23.118112244898  | 2.00083039236039   | 26 |
| 24                                                         | 204      | protein targeting                                                   | 8.15064581497228e-21 | 21.2109627191594 | 1.90374368555809   |    |
| GO:0034623                                                 |          | viral reproduction                                                  | 2.58623905985937e-07 | 19.1009927453226 | 0.439000761192997  |    |
| 23                                                         | 174      | rRNA processing                                                     | 3.79862200443738e-07 | 17.9807623157138 | 0.464327728184901  |    |
| GO:0006402                                                 |          | rRNA metabolic process                                              | 8.41122338662158e-07 | 72.0601503759399 | 0.075980900975711  |    |
| 23                                                         | 178      | ribosomal small subunit biogenesis                                  | 1.83839607117553e-06 | 11.1619496855346 | 0.844232233063456  |    |
| GO:0032984                                                 |          | ncRNA processing                                                    | 2.94517320801079e-06 | 13.0067814293166 | 0.628953013632275  |    |
| 179                                                        | macromol | ribosome biogenesis                                                 | 4.41542322260067e-06 | 9.85862098947918 | 0.949761262196388  |    |
| GO:0006401                                                 |          | ribonucleoprotein complex biogenesis                                | 6.88629834733271e-06 | 9.25198072367884 | 1.00885751851083   |    |
| 23                                                         | 205      | cellular component biogenesis at cellular level                     | 1.53240389507124e-05 | 82.6494252873563 | 0.0506539339838073 |    |
| GO:0019058                                                 |          | ribosomal large subunit biogenesis                                  |                      |                  |                    |    |
| 231                                                        | viral    |                                                                     |                      |                  |                    |    |
| GO:0071845                                                 |          |                                                                     |                      |                  |                    |    |
| 24                                                         | 284      |                                                                     |                      |                  |                    |    |
| GO:0022411                                                 |          |                                                                     |                      |                  |                    |    |
| 24                                                         | 288      |                                                                     |                      |                  |                    |    |
| GO:0022415                                                 |          |                                                                     |                      |                  |                    |    |
| 23                                                         | 260      |                                                                     |                      |                  |                    |    |
| GO:0033365                                                 |          |                                                                     |                      |                  |                    |    |
| 26                                                         | 473      |                                                                     |                      |                  |                    |    |
| GO:0006605                                                 |          |                                                                     |                      |                  |                    |    |
| 474                                                        | protein  |                                                                     |                      |                  |                    |    |
| GO:0016032                                                 |          |                                                                     |                      |                  |                    |    |
| 24                                                         | 451      |                                                                     |                      |                  |                    |    |
| GO:0006364                                                 |          |                                                                     |                      |                  |                    |    |
| 7                                                          | 104      |                                                                     |                      |                  |                    |    |
| GO:0016072                                                 |          |                                                                     |                      |                  |                    |    |
| 7                                                          | 110      |                                                                     |                      |                  |                    |    |
| GO:0042274                                                 |          |                                                                     |                      |                  |                    |    |
| 4                                                          | 18       |                                                                     |                      |                  |                    |    |
| GO:0034470                                                 |          |                                                                     |                      |                  |                    |    |
| 8                                                          | 200      |                                                                     |                      |                  |                    |    |
| GO:0042254                                                 |          |                                                                     |                      |                  |                    |    |
| 7                                                          | 149      |                                                                     |                      |                  |                    |    |
| GO:0022613                                                 |          |                                                                     |                      |                  |                    |    |
| 8                                                          | 225      |                                                                     |                      |                  |                    |    |
| GO:0071843                                                 |          |                                                                     |                      |                  |                    |    |
| 8                                                          | 239      |                                                                     |                      |                  |                    |    |
| GO:0042273                                                 |          |                                                                     |                      |                  |                    |    |
| 3                                                          | 12       |                                                                     |                      |                  |                    |    |
| Tissue: Heart_Left_Ventricle=>Artery_Tibial Type: cluster  |          |                                                                     |                      |                  |                    |    |
| SourceGene: SGK3(ENSG00000104205.7)                        |          |                                                                     |                      |                  |                    |    |
| TargetGeneSet: S5U72 RPL22 RPL11 TRNAU1AP SERINC2 RP1 RP11 |          |                                                                     |                      |                  |                    |    |
| MAGOH RP4 MRPS21 RPS27 SNRPE ARF1 RPL35P1 FTH1P3 UBC DGUOK |          |                                                                     |                      |                  |                    |    |

Stable4\_20PerPair

| GO:ID      | Pvalue               | OddsRatio | ExpCount         | Count             | Size              | Term                                                                |
|------------|----------------------|-----------|------------------|-------------------|-------------------|---------------------------------------------------------------------|
| GO:0006415 | 1.57455419803483e-63 |           | 239.29674796748  | 0.491177081170853 |                   | translational termination 37                                        |
| GO:0006414 | 5.78022036667412e-63 |           | 202.846268656716 |                   | 0.566742785966369 | translational elongation                                            |
| GO:0006614 | 5.78022036667412e-63 |           | 202.846268656716 |                   | 0.566742785966369 | SRP-dependent cotranslational protein targeting to membrane         |
| GO:0006613 | 8.98587057611901e-63 |           | 199.849264705882 |                   | 0.572140336308906 | cotranslational protein targeting to membrane                       |
| GO:0045047 | 8.98587057611901e-63 |           | 199.849264705882 |                   | 0.572140336308906 | protein targeting to ER                                             |
| GO:0072599 | 8.98587057611901e-63 |           | 199.849264705882 |                   | 0.572140336308906 | establishment of protein localization to endoplasmic reticulum      |
| GO:0070972 | 1.23164253147627e-60 |           | 169.729375       | 0.636910940419348 |                   | protein localization to endoplasmic reticulum 38                    |
| GO:0000184 | 1.80453127497669e-60 |           | 167.622222222222 |                   | 0.642308490761885 | nuclear-transcribed mRNA catabolic process, nonsense-mediated decay |
| GO:0019080 | 5.40186848028664e-58 |           | 127.330357142857 |                   | 0.815030101723064 | viral genome expression                                             |
| GO:0019083 | 5.40186848028664e-58 |           | 127.330357142857 |                   | 0.815030101723064 | viral transcription                                                 |
| GO:0006612 | 1.17324426745036e-55 |           | 117.78347826087  | 0.825825202408138 |                   | protein targeting to membrane 38                                    |
| GO:0000956 | 8.25130701679587e-54 |           | 103.281679389313 |                   | 0.912186007888727 | nuclear-transcribed mRNA catabolic process                          |
| GO:0006413 | 1.0166946493539e-53  |           | 111.886744432662 |                   | 0.820427652065601 | translational initiation                                            |
| GO:0043624 | 1.33724293941541e-53 |           | 110.914423885618 |                   | 0.825825202408138 | cellular protein complex disassembly                                |
| GO:0043241 | 5.10614434635478e-53 |           | 106.293892360411 |                   | 0.852812954120822 | protein complex disassembly                                         |
| GO:0006402 | 7.39965128898052e-53 |           | 96.5810714285714 |                   | 0.960763960971559 | mRNA catabolic process                                              |
| GO:0072594 | 2.62428925183606e-52 |           | 86.1090909090909 |                   | 1.10110026987752  | establishment of protein localization to organelle                  |
| GO:0034623 | 2.73344903640097e-51 |           | 93.7746127826242 |                   | 0.939173759601412 | cellular macromolecular complex disassembly                         |
| GO:0032984 | 8.70764332879594e-51 |           | 90.4409137753349 |                   | 0.966161511314096 | macromolecular complex disassembly                                  |
| GO:0006401 | 2.68274690096029e-50 |           | 80.8125748502994 |                   | 1.10649782022005  | RNA catabolic process                                               |
| GO:0019058 | 5.04178657435553e-50 |           | 73.859375        | 1.24683412912601  |                   | viral infectious cycle 39                                           |
| GO:0022415 | 7.01197806148395e-48 |           | 64.0361990950226 |                   | 1.40336308905958  | viral reproductive process                                          |
| GO:0071845 | 7.98676431043288e-43 |           | 51.6107435568283 |                   | 1.53290429728046  | cellular component disassembly at cellular level                    |
| GO:0022411 | 1.37307247233716e-42 |           | 50.7738800893985 |                   | 1.55449449865061  | cellular component disassembly                                      |
| GO:0016032 | 9.51183752138724e-40 |           | 35.7587399154821 |                   | 2.43429520448412  | viral reproduction                                                  |
| GO:0033365 | 2.16702394685727e-37 |           | 32.1175115207373 |                   | 2.55304131201993  | protein localization to organelle                                   |

Stable4\_20PerPair

|            |                      |                                                 |                    |
|------------|----------------------|-------------------------------------------------|--------------------|
| GO:0006605 | 2.35489516309937e-37 | 32.0413793103448                                | 2.55843886236247   |
| 39         | 474                  | protein targeting                               |                    |
| GO:0022613 | 5.11558695623592e-14 | 17.489118691156                                 | 1.21444882707079   |
| 225        |                      | ribonucleoprotein complex biogenesis            | 16                 |
| GO:0071843 | 1.31113260928741e-13 | 16.3749457543758                                | 1.29001453186631   |
| 16         | 239                  | cellular component biogenesis at cellular level |                    |
| GO:0042254 | 4.15417956967026e-10 | 16.9354315379624                                | 0.804235001037991  |
| 11         | 149                  | ribosome biogenesis                             |                    |
| GO:0042274 | 3.26261657760861e-08 | 75.6585879873551                                | 0.0971559061656633 |
| 5          | 18                   | ribosomal small subunit biogenesis              |                    |
| GO:0006364 | 8.47438320281285e-08 | 16.9964285714286                                | 0.561345235623832  |
| 8          | 104                  | rRNA processing                                 |                    |
| GO:0016072 | 1.31346588354507e-07 | 15.9899159663866                                | 0.593730537679053  |
| 8          | 110                  | rRNA metabolic process                          |                    |
| GO:0022618 | 7.66284453746082e-07 | 16.0043213828425                                | 0.512767282541001  |
| 7          | 95                   | ribonucleoprotein complex assembly              |                    |
| GO:0071826 | 1.08642122355679e-06 | 15.1385733757383                                | 0.539755034253685  |
| 7          | 100                  | ribonucleoprotein complex subunit organization  |                    |
| GO:0034660 | 2.93190961612754e-06 | 7.53903743315508                                | 1.538301847623     |
| 285        |                      | ncRNA metabolic process                         | 10                 |
| GO:0034470 | 1.19737078681023e-05 | 8.44107142857143                                | 1.07951006850737   |
| 8          | 200                  | ncRNA processing                                |                    |

Tissue: Heart\_Left\_Ventricle=>Artery\_Tibial Type: asymmetric

SourceGene: SRPX2(ENSG00000102359.5)

|                |          |        |          |         |        |          |          |         |         |
|----------------|----------|--------|----------|---------|--------|----------|----------|---------|---------|
| TargetGeneSet: | CHCHD2P6 | SPEN   | SDHDP1   | SRSF4   | MECR   | SLC2A1   | CRTC2    | SDHC    |         |
| RP4            | SLC41A1  | RP11   | ODC1     | ITSN2   | OST4   | MORN2    | COX5B    | NDUFB3  | LSM3    |
| SETD2          | LAMB2    | DZIP3  | NDUFB4   | UBA5    | OCIAD1 | NDUFC1   | C4orf27  | CCDC111 | PDCD6   |
| NIPBL          | UQCRQ    | SAP30L | FBXW11   | NHP2    | HNRNPC | FOXP4    | HMGN3    | GTF2H5  | RPA3    |
| NDUFA4         | GNG11    | ATP5J2 | PMS2P1   | UBE2V2  | DECR1  | COX6C    | PLIN2    | NDUFB6  | YBX1P10 |
| NDUFB8         | PDZD8    | RPLP2  | C11orf84 |         | MARK2  | MRPL11   | C11orf51 |         | INPPL1  |
| CLNS1A         | DCUN1D5  | MLL    | PRDM10   | SNRPF   | MRPS31 | SNRPGP14 |          | C14orf2 | MNS1    |
| ZNF609         | LARP6    | AXIN1  | CREBBP   | NDUFAB1 | C1QBP  | ARHGAP44 |          | ATP5G1  | PPP1R9B |
| SPIRE1         | SNRPD1   | UQCR11 | GNA11    | NDUFA11 | NDUFA7 | DNM2     | NDUFB7   | NDUFA13 | COX6B1  |
| CAPNS1         | COX7A1   | SAMD4B | ARHGAP35 |         | NDUFA3 | CDS2     | ITCH     | SYS1    | PCIF1   |
| ATP5E          | MRPL40   | TCF20  | SYAP1    | RPS2P55 | PDZD11 | COX7B    | RPL39    | NDUFA1  | FAM127A |
| CETN2          | MECP2    |        |          |         |        |          |          |         |         |

| GOBPID     | Pvalue | OddsRatio | ExpCount             | Count            | Size | Term                                                   |
|------------|--------|-----------|----------------------|------------------|------|--------------------------------------------------------|
| GO:0022904 | 23     | 96        | 5.39257369326029e-31 | 67.1895317930893 |      | 0.597882499481005                                      |
|            |        |           |                      |                  |      | respiratory electron transport chain                   |
| GO:0022900 | 23     | 134       | 2.31735939610556e-27 | 44.0701895925777 |      | 0.834544322192236                                      |
|            |        |           |                      |                  |      | electron transport chain                               |
| GO:0045333 | 23     | 142       | 9.56187231160494e-27 | 41.0844098833563 |      | 0.884367863815653                                      |
|            |        |           |                      |                  |      | cellular respiration                                   |
| GO:0015980 | 25     | 307       | 1.91663543718354e-21 | 19.2021276595745 |      | 1.91197840979863                                       |
|            |        |           |                      |                  |      | energy derivation by oxidation of organic compounds    |
| GO:0006091 | 26     | 428       | 4.36092091650197e-19 | 14.1065764925373 |      | 2.66555947685281                                       |
|            |        |           |                      |                  |      | generation of precursor metabolites and energy         |
| GO:0006120 | 11     | 36        | 1.53887312940392e-16 | 79.8460759493671 |      | 0.224205937305377                                      |
|            |        |           |                      |                  |      | mitochondrial electron transport, NADH to ubiquinone   |
| GO:0042773 | 11     | 47        | 4.2209206802955e-15  | 55.4061181434599 |      | 0.292713307037575                                      |
|            |        |           |                      |                  |      | ATP synthesis coupled electron transport               |
| GO:0042775 | 11     | 47        | 4.2209206802955e-15  | 55.4061181434599 |      | 0.292713307037575                                      |
|            |        |           |                      |                  |      | mitochondrial ATP synthesis coupled electron transport |
| GO:0006119 | 11     | 58        | 5.22075051791067e-14 | 42.4061405871263 |      | 0.361220676769774                                      |
|            |        |           |                      |                  |      | oxidative phosphorylation                              |

Tissue: Heart\_Left\_Ventricle=>Artery\_Tibial Type: asymmetric

SourceGene: TMEM209(ENSG00000146842.11)

|                |          |        |        |          |          |          |
|----------------|----------|--------|--------|----------|----------|----------|
| TargetGeneSet: | MTND1P23 | DVL1   | MRPL20 | PANK4    | CTNNBIP1 | SNORA59A |
| ZBTB17         | KHDRBS1  | RP11   | PSMB2  | STK40    | RP1      | PPIH     |
| MAGI3          | PEX11B   | MRPS21 | SMG5   | EDEM3    | IVNS1ABP | MIR4426  |
| TATDN3         | NUP133   | TOMM20 | PXDN   | E1F3FP3  | STAMBP   | DGUOK    |
| PLEKHB2        | FMNL2    | UBE2V1 | WIPF1  | SMARCAL1 |          | RPL37A   |
| HDLBP          | THUMPD3  | RPL32  | GOLGA4 | ZNF662   | KRBOX1   | KIF9     |
|                |          |        |        |          |          | PHF7     |
|                |          |        |        |          |          | SPCS1    |
|                |          |        |        |          |          | RPL10AP6 |

Stable4\_20PerPair

| GO:ID      | GO:Term                                                             | OddsRatio            | ExpCount         | Count | Size             | Term |
|------------|---------------------------------------------------------------------|----------------------|------------------|-------|------------------|------|
| GO:0000184 | nuclear-transcribed mRNA catabolic process, nonsense-mediated decay | 4.4475426789295e-27  | 25.6325791855204 | 25    | 1.63047539962632 |      |
| GO:0006415 | translational termination                                           | 1.24960699750726e-24 | 29.2043232115286 | 24    | 1.24683412912601 |      |
| GO:0006614 | SRP-dependent cotranslational protein targeting to membrane         | 2.1188291150343e-24  | 25.6015173410405 | 25    | 1.43865476437617 |      |
| GO:0070972 | protein localization to endoplasmic reticulum                       | 2.12773192742727e-24 | 23.2675682507583 | 26    | 1.61677392567988 |      |
| GO:0006613 | cotranslational protein targeting to membrane                       | 2.74069048104523e-24 | 25.2836651680582 | 25    | 1.45235623832261 |      |
| GO:0045047 | protein targeting to ER                                             | 2.74069048104523e-24 | 25.2836651680582 | 25    | 1.45235623832261 |      |
| GO:0072599 | establishment of protein localization to endoplasmic reticulum      | 2.74069048104523e-24 | 25.2836651680582 | 25    | 1.45235623832261 |      |
| GO:0006414 | translational elongation                                            | 5.33902265678678e-23 | 24.1328224776501 | 24    | 1.43865476437617 |      |
| GO:0000956 | nuclear-transcribed mRNA catabolic process                          | 1.36403264097387e-22 | 16.4846057571965 | 28    | 2.31554909694831 |      |
| GO:0006402 | mRNA catabolic process                                              | 5.96612376275673e-22 | 15.4856470588235 | 28    | 2.43886236246627 |      |
| GO:0072594 | establishment of protein localization to organelle                  | 1.98155304673631e-21 | 13.8042941673711 | 204   | 2.7951006850737  | 29   |
| GO:0006413 | translational initiation                                            | 2.10436781491553e-21 | 16.9482281284607 | 26    | 2.08262403985883 |      |
| GO:0006612 | protein targeting to membrane                                       | 2.5058898393247e-21  | 16.8135872550815 | 26    | 2.09632551380527 |      |
| GO:0019080 | viral genome expression                                             | 2.9833039674986e-20  | 16.2021745114231 | 25    | 2.06892256591239 |      |
| GO:0019083 | viral transcription                                                 | 2.9833039674986e-20  | 16.2021745114231 | 25    | 2.06892256591239 |      |
| GO:0006401 | RNA catabolic process                                               | 3.10642150925915e-20 | 13.0983050847458 | 28    | 2.80880215902014 |      |
| GO:0043624 | cellular protein complex disassembly                                | 6.58223766990509e-19 | 15.1018444266239 | 24    | 2.09632551380527 |      |
| GO:0034623 | cellular macromolecular complex disassembly                         | 1.05790892337272e-18 | 13.6788610001164 | 25    | 2.38405646668051 |      |
| GO:0043241 | protein complex disassembly                                         | 1.43125680767102e-18 | 14.5331960885229 | 24    | 2.16483288353747 |      |
| GO:0032984 |                                                                     | 2.13673782115282e-18 | 13.2300502965243 | 24    | 2.4525638364127  | 25   |

Stable4\_20PerPair

|                                                             |                                                                         |                      |                  |                  |           |                  |           |                  |            |
|-------------------------------------------------------------|-------------------------------------------------------------------------|----------------------|------------------|------------------|-----------|------------------|-----------|------------------|------------|
| 179                                                         | macromolecular complex disassembly                                      |                      |                  |                  |           |                  |           |                  |            |
| GO:0019058                                                  |                                                                         | 1.03035553385597e-15 | 9.85394803299848 |                  |           |                  |           | 3.16504048162757 |            |
| 25                                                          | 231 viral infectious cycle                                              |                      |                  |                  |           |                  |           |                  |            |
| GO:0022415                                                  |                                                                         | 1.64760724398278e-14 | 8.62009592916    | 3.56238322607432 |           |                  |           |                  | 25         |
| 260                                                         | viral reproductive process                                              |                      |                  |                  |           |                  |           |                  |            |
| GO:0006605                                                  |                                                                         | 6.2895206258191e-14  | 6.02344218502971 |                  |           |                  |           | 6.49449865061241 |            |
| 32                                                          | 474 protein targeting                                                   |                      |                  |                  |           |                  |           |                  |            |
| GO:0071845                                                  |                                                                         | 1.25384141502437e-13 | 7.8079317963711  | 3.89121860078887 |           |                  |           |                  | 25         |
| 284                                                         | cellular component disassembly at cellular level                        |                      |                  |                  |           |                  |           |                  |            |
| GO:0022411                                                  |                                                                         | 1.72368501580996e-13 | 7.68698213147542 |                  |           |                  |           | 3.94602449657463 |            |
| 25                                                          | 288 cellular component disassembly                                      |                      |                  |                  |           |                  |           |                  |            |
| GO:0016032                                                  |                                                                         | 6.12524478137023e-13 | 5.86698337292161 |                  |           |                  |           | 6.1793647498443  | 30         |
| 451                                                         | viral reproduction                                                      |                      |                  |                  |           |                  |           |                  |            |
| GO:0033365                                                  |                                                                         | 2.07562715114111e-12 | 5.56675266043212 |                  |           |                  |           | 6.48079717666598 |            |
| 30                                                          | 473 protein localization to organelle                                   |                      |                  |                  |           |                  |           |                  |            |
| Tissue: Heart_Left_Ventricle=>Artery_Tibial Type: cluster   |                                                                         |                      |                  |                  |           |                  |           |                  |            |
| SourceGene: TMEM209(ENSG00000146842.11)                     |                                                                         |                      |                  |                  |           |                  |           |                  |            |
| TargetGeneSet: MTND1P23 DVL1 MRPL20 PANK4 CTNNBIP1 SNORA59A |                                                                         |                      |                  |                  |           |                  |           |                  |            |
| ZBTB17                                                      | KHDRBS1                                                                 | RP11                 | PSMB2            | STK40            | RP1       | PPIH             | PRPF38A   | RP4              | LRR39      |
| MAGI3                                                       | PEX11B                                                                  | MRPS21               | SMG5             | EDEM3            | IVNS1ABP  |                  | MIR4426   | NUCKS1           | INTS7 NENF |
| TATDN3                                                      | NUP133                                                                  | TOMM20               | PXDN             | EIF3FP3          | STAMBP    | DGUOK            | RPL31     | MAP4K4           | CCDC115    |
| PLEKHB2                                                     | FMNL2                                                                   | UBE2V1               | WIPF1            | SMARCAL1         |           | RPL37A           | RNF25     | TTLL4            | INHA       |
| HDLBP                                                       | THUMP3                                                                  | RPL32                | GOLGA4           | ZNF662           | KRBOX1    | KIF9             | PHF7      | SPCS1            | RPL10AP6   |
| RPL24                                                       | CD200R1                                                                 | RPL7AP11             |                  | FAM86HP          | ZBTB38    | UBQLN4P1         |           | RPL35A           | ZNF718     |
| ABCA11P                                                     | MYL5                                                                    | TMEM128              | DCAF16           | SLC30A9          | MTHFD2L   | LARP7            | PLK4      | OTUD4            | WWC2 FRG1  |
| FAM105B                                                     | RPL37                                                                   | FBXO4                | CTD              | RPS23            | PIIP5K2   | P4HA2            | SEC24A    | CTB              | PDF        |
| RPS14                                                       | UBLCP1                                                                  | BRD2                 | TAF11            | RPL10A           | FTSJD2    | MRPL2            | GSTA4     | RPL39P3          | HMG3       |
| RARS2                                                       | RSPH4A                                                                  | TAB2                 | PHF10            | C6orf70          | FAM120B   | TOMM7            | PMS2P4    | STAG3L4          | EIF4H      |
| GTF2IP1                                                     | ECD                                                                     | PMS2P1               | ST7-AS1          | IMP1D1           | TMEM209   | SSBP1            | SLC4A2    | KIAA1967         |            |
| C8orf40                                                     | RPL10AP2                                                                |                      | CHCHD7           | C8orf44          | HNRNPA1P4 |                  | C8orf59   | RPL30            | UTP23      |
| NDUFB9                                                      | ERMP1                                                                   | DCTN3                | FAM205A          | C9orf103         |           | RPS10P3          | BICD2     | INVS             | CDC26      |
| RPL35                                                       | SCAI                                                                    | STXBP1               | PPP1R26          | CDNF             | C1DP1     | FGFBP3           | RPL13AP5  |                  | C10orf12   |
| ACADSB                                                      | METTL10                                                                 | SIRT3                | RPLP2            | AP2A2            | SWAP70    | PLEKHA7          | PEX16     | C11orf10         | FAU        |
| PITPNM1                                                     | C11orf51                                                                |                      | C2CD3            | C11orf1          | USP28     | DPAGT1           | PRKAG1    | DAZAP2           | PRR13      |
| ATP5G2                                                      | WIBG                                                                    | RPL41                | RPL14P1          | XPOT             | C12orf34  |                  | DIABLO    | RFC3             | CLN5       |
| STK24-AS1                                                   |                                                                         | A2LD1                | FANCM            | RPS29            | EXD2      | ERH              | GSTZ1     | RPL3P4           | HMG2P5     |
| TMEM85                                                      | ATPBD4                                                                  | TYRO3                | TP53BP1          | GALK2            | TCF12     | COMMD4           | PEAK1     | UBE2I            | ADCY9 PARN |
| MPV17L                                                      | KIF22                                                                   | FUS                  | NUDT21           | NAE1             | TMEM170A  |                  | CYB5D2    | UPF3AP1          | DRG2       |
| LLGL1                                                       | FOXO3B                                                                  | C17orf108            |                  | RPS7P1           | CCT6B     | RPL17            | RPL19     | PGAP3            | SMARCE1    |
| DHX58                                                       | VPS25                                                                   | RPL27                | MRPL10           | ANKRD40          | BRIP1     | RPL38            | SLC25A19  |                  | ELAC1      |
| CIRBP                                                       | PNPLA6                                                                  | NDUFA7               | HOOK2            | PIK3R2           | UBA52     | GAPDHS           | COX6B1    | ALKBH6           | EIF3K      |
| HNRNPL                                                      | RPS16                                                                   | SNRPA                | RPS19            | ZNF155           | ZNF226    | TRAPPC6A         |           | SNRPD2           | RPS11      |
| AKT1S1                                                      | C19orf48                                                                |                      | PPP2R1A          | NLRP9            | ZSCAN22   | ZNF446           | CHMP2A    | DTD1             | CDK5RAP1   |
| MT1P3                                                       | MMP24                                                                   | C20orf4              | SNHG11           | IFT52            | SLC35C2   | RPS21            | C21orf119 |                  | GCFC1-AS1  |
| U2AF1                                                       | CRKL                                                                    | EWSR1                | PICK1            | CTA              | RANGAP1   | TCF20            | EBP       | RBM3             | SUV39H1    |
| RRAGB                                                       | RPS23P8                                                                 | CXorf56              | FAM122C          | IDH3G            |           |                  |           |                  |            |
| GOBPID                                                      | Pvalue                                                                  | OddsRatio            | ExpCount         | Count            | Size      | Term             |           |                  |            |
| GO:0000184                                                  |                                                                         | 4.4475426789295e-27  | 25.6325791855204 |                  |           | 1.63047539962632 |           |                  |            |
| 28                                                          | 119 nuclear-transcribed mRNA catabolic process, nonsense-mediated decay |                      |                  |                  |           |                  |           |                  |            |
| GO:0006415                                                  |                                                                         | 1.24960699750726e-24 | 29.2043232115286 |                  |           | 1.24683412912601 |           |                  |            |
| 24                                                          | 91 translational termination                                            |                      |                  |                  |           |                  |           |                  |            |
| GO:0006614                                                  |                                                                         | 2.1188291150343e-24  | 25.6015173410405 |                  |           | 1.43865476437617 |           |                  |            |
| 25                                                          | 105 SRP-dependent cotranslational protein targeting to membrane         |                      |                  |                  |           |                  |           |                  |            |
| GO:0070972                                                  |                                                                         | 2.12773192742727e-24 | 23.2675682507583 |                  |           | 1.61677392567988 |           |                  |            |
| 26                                                          | 118 protein localization to endoplasmic reticulum                       |                      |                  |                  |           |                  |           |                  |            |
| GO:0006613                                                  |                                                                         | 2.74069048104523e-24 | 25.2836651680582 |                  |           | 1.45235623832261 |           |                  |            |
| 25                                                          | 106 cotranslational protein targeting to membrane                       |                      |                  |                  |           |                  |           |                  |            |
| GO:0045047                                                  |                                                                         | 2.74069048104523e-24 | 25.2836651680582 |                  |           | 1.45235623832261 |           |                  |            |
| 25                                                          | 106 protein targeting to ER                                             |                      |                  |                  |           |                  |           |                  |            |
| GO:0072599                                                  |                                                                         | 2.74069048104523e-24 | 25.2836651680582 |                  |           | 1.45235623832261 |           |                  |            |
| 25                                                          | 106 establishment of protein localization to endoplasmic reticulum      |                      |                  |                  |           |                  |           |                  |            |
| GO:0006414                                                  |                                                                         | 5.33902265678678e-23 | 24.1328224776501 |                  |           | 1.43865476437617 |           |                  |            |
| 24                                                          | 105 translational elongation                                            |                      |                  |                  |           |                  |           |                  |            |

Stable4\_20PerPair

|                                             |                                                                |                  |                     |
|---------------------------------------------|----------------------------------------------------------------|------------------|---------------------|
| GO:0000956                                  | 1.36403264097387e-22                                           | 16.4846057571965 | 2.31554909694831    |
| 28 169                                      | nuclear-transcribed mRNA catabolic process                     |                  |                     |
| GO:0006402                                  | 5.96612376275673e-22                                           | 15.4856470588235 | 2.43886236246627    |
| 28 178                                      | mRNA catabolic process                                         |                  |                     |
| GO:0072594                                  | 1.98155304673631e-21                                           | 13.8042941673711 | 2.7951006850737 29  |
| 204                                         | establishment of protein localization to organelle             |                  |                     |
| GO:0006413                                  | 2.10436781491553e-21                                           | 16.9482281284607 | 2.08262403985883    |
| 26 152                                      | translational initiation                                       |                  |                     |
| GO:0006612                                  | 2.5058898393247e-21                                            | 16.8135872550815 | 2.09632551380527    |
| 26 153                                      | protein targeting to membrane                                  |                  |                     |
| GO:0019080                                  | 2.9833039674986e-20                                            | 16.2021745114231 | 2.06892256591239    |
| 25 151                                      | viral genome expression                                        |                  |                     |
| GO:0019083                                  | 2.9833039674986e-20                                            | 16.2021745114231 | 2.06892256591239    |
| 25 151                                      | viral transcription                                            |                  |                     |
| GO:0006401                                  | 3.10642150925915e-20                                           | 13.0983050847458 | 2.80880215902014    |
| 28 205                                      | RNA catabolic process                                          |                  |                     |
| GO:0043624                                  | 6.58223766990509e-19                                           | 15.1018444266239 | 2.09632551380527    |
| 24 153                                      | cellular protein complex disassembly                           |                  |                     |
| GO:0034623                                  | 1.05790892337272e-18                                           | 13.6788610001164 | 2.38405646668051    |
| 25 174                                      | cellular macromolecular complex disassembly                    |                  |                     |
| GO:0043241                                  | 1.43125680767102e-18                                           | 14.5331960885229 | 2.16483288353747    |
| 24 158                                      | protein complex disassembly                                    |                  |                     |
| GO:0032984                                  | 2.13673782115282e-18                                           | 13.2300502965243 | 2.4525638364127 25  |
| 179                                         | macromolecular complex disassembly                             |                  |                     |
| GO:0019058                                  | 1.03035553385597e-15                                           | 9.85394803299848 | 3.16504048162757    |
| 25 231                                      | viral infectious cycle                                         |                  |                     |
| GO:0022415                                  | 1.64760724398278e-14                                           | 8.62009592916    | 3.56238322607432 25 |
| 260                                         | viral reproductive process                                     |                  |                     |
| GO:0006605                                  | 6.2895206258191e-14                                            | 6.02344218502971 | 6.49449865061241    |
| 32 474                                      | protein targeting                                              |                  |                     |
| GO:0071845                                  | 1.25384141502437e-13                                           | 7.8079317963711  | 3.89121860078887 25 |
| 284                                         | cellular component disassembly at cellular level               |                  |                     |
| GO:0022411                                  | 1.72368501580996e-13                                           | 7.68698213147542 | 3.94602449657463    |
| 25 288                                      | cellular component disassembly                                 |                  |                     |
| GO:0016032                                  | 6.12524478137023e-13                                           | 5.86698337292161 | 6.1793647498443 30  |
| 451                                         | viral reproduction                                             |                  |                     |
| GO:0033365                                  | 2.07562715114111e-12                                           | 5.56675266043212 | 6.48079717666598    |
| 30 473                                      | protein localization to organelle                              |                  |                     |
| Tissue: Heart_Left_Ventricle=>Artery_Tibial | Type: asymmetric                                               |                  |                     |
| SourceGene:                                 | TNFSF8(ENSG00000106952.3)                                      |                  |                     |
| TargetGeneSet:                              | SSR2 DNM3 EIF3FP3 IGKV2-28 GRIP2 BAP1 ACTR8 PARL               |                  |                     |
| LGALS13 MED10                               | RPS14 C6orf47 TOX EXOSC2 RPL7A RPL13AP5 SF3B2                  |                  |                     |
| NFRKB KRT80                                 | ATP5G2 RPLP0 LINC00402 CTD RP11 RPL4 ARNT2                     |                  |                     |
| CMTM4 MRPL10                                | MBD1 GTF2F1 ELOF1 TNPO2 KXD1 CD22 PAK4 RPS16 FBL               |                  |                     |
| SNRPA TOMM40                                | RPS9 RPS5 U2AF1 PES1 TSR2 CD24P4                               |                  |                     |
| GOBPID                                      | Pvalue OddsRatio ExpCount Count Size Term                      |                  |                     |
| GO:0042254                                  | 5.80270567036366e-11                                           | 35.2978021978022 | 0.360874679952944   |
| 9 149                                       | ribosome biogenesis                                            |                  |                     |
| GO:0022613                                  | 8.95478012879855e-11                                           | 26.4204651162791 | 0.544944986506124   |
| 10 225                                      | ribonucleoprotein complex biogenesis                           |                  |                     |
| GO:0006614                                  | 1.18585378692479e-10                                           | 43.7388316151203 | 0.254307660369525   |
| 8 105                                       | SRP-dependent cotranslational protein targeting to membrane    |                  |                     |
| GO:0006613                                  | 1.28051824785142e-10                                           | 43.2894935752079 | 0.25672963808733    |
| 8 106                                       | cotranslational protein targeting to membrane                  |                  |                     |
| GO:0045047                                  | 1.28051824785142e-10                                           | 43.2894935752079 | 0.25672963808733    |
| 8 106                                       | protein targeting to ER                                        |                  |                     |
| GO:0072599                                  | 1.28051824785142e-10                                           | 43.2894935752079 | 0.25672963808733    |
| 8 106                                       | establishment of protein localization to endoplasmic reticulum |                  |                     |
| GO:0071843                                  | 1.62090198429492e-10                                           | 24.7807860262009 | 0.578852674555394   |
| 10 239                                      | cellular component biogenesis at cellular level                |                  |                     |
| GO:0070972                                  | 3.04443730394314e-10                                           | 38.5346801346801 | 0.28579337070099    |
| 8 118                                       | protein localization to endoplasmic reticulum                  |                  |                     |
| GO:0072594                                  | 9.59066382228669e-10                                           | 25.2443786982249 | 0.494083454432219   |

|                                        |     | Stable4_20PerPair                                                   |                  |                   |
|----------------------------------------|-----|---------------------------------------------------------------------|------------------|-------------------|
| 9                                      | 204 | establishment of protein localization to organelle                  |                  |                   |
| GO:0006415                             |     | 1.80959242668293e-09                                                | 42.6547619047619 | 0.220399972320255 |
| 7                                      | 91  | translational termination                                           |                  |                   |
| GO:0019080                             |     | 2.18633765244899e-09                                                | 29.5736855736856 | 0.365718635388554 |
| 8                                      | 151 | viral genome expression                                             |                  |                   |
| GO:0019083                             |     | 2.18633765244899e-09                                                | 29.5736855736856 | 0.365718635388554 |
| 8                                      | 151 | viral transcription                                                 |                  |                   |
| GO:0006612                             |     | 2.42699389846001e-09                                                | 29.1616858237548 | 0.370562590824164 |
| 8                                      | 153 | protein targeting to membrane                                       |                  |                   |
| GO:0006414                             |     | 4.96878665174025e-09                                                | 36.5255102040816 | 0.254307660369525 |
| 7                                      | 105 | translational elongation                                            |                  |                   |
| GO:0000956                             |     | 5.33051794798591e-09                                                | 26.2341844950541 | 0.409314234309044 |
| 8                                      | 169 | nuclear-transcribed mRNA catabolic process                          |                  |                   |
| GO:0006402                             |     | 8.02117185783308e-09                                                | 24.8296296296296 | 0.431112033769289 |
| 8                                      | 178 | mRNA catabolic process                                              |                  |                   |
| GO:0000184                             |     | 1.1940679007949e-08                                                 | 31.9285714285714 | 0.288215348418795 |
| 7                                      | 119 | nuclear-transcribed mRNA catabolic process, nonsense-mediated decay |                  |                   |
| GO:0006401                             |     | 2.42382829928545e-08                                                | 21.3859748072946 | 0.496505432150024 |
| 8                                      | 205 | RNA catabolic process                                               |                  |                   |
| GO:0019058                             |     | 6.12718217428007e-08                                                | 18.8579970104634 | 0.559476852812954 |
| 8                                      | 231 | viral infectious cycle                                              |                  |                   |
| GO:0006413                             |     | 6.51431909511458e-08                                                | 24.6051724137931 | 0.368140613106359 |
| 7                                      | 152 | translational initiation                                            |                  |                   |
| GO:0043624                             |     | 6.81501319057261e-08                                                | 24.4349315068493 | 0.370562590824164 |
| 7                                      | 153 | cellular protein complex disassembly                                |                  |                   |
| GO:0043241                             |     | 8.50084415069431e-08                                                | 23.6175496688742 | 0.382672479413189 |
| 7                                      | 158 | protein complex disassembly                                         |                  |                   |
| GO:0033365                             |     | 1.12931857761601e-07                                                | 12.0544276457883 | 1.14559546052176  |
| 10                                     | 473 | protein localization to organelle                                   |                  |                   |
| GO:0022415                             |     | 1.52404299006734e-07                                                | 16.6537330981775 | 0.629714206629299 |
| 8                                      | 260 | viral reproductive process                                          |                  |                   |
| GO:0034623                             |     | 1.64550189728571e-07                                                | 21.3308383233533 | 0.421424122898069 |
| 7                                      | 174 | cellular macromolecular complex disassembly                         |                  |                   |
| GO:0006364                             |     | 1.64612882806908e-07                                                | 30.2280084447572 | 0.25188568265172  |
| 6                                      | 104 | rRNA processing                                                     |                  |                   |
| GO:0032984                             |     | 1.99626642814782e-07                                                | 20.703488372093  | 0.433534011487094 |
| 179                                    |     | macromolecular complex disassembly                                  |                  | 7                 |
| GO:0016072                             |     | 2.29963934403525e-07                                                | 28.4721485411141 | 0.26641754895855  |
| 6                                      | 110 | rRNA metabolic process                                              |                  |                   |
| GO:0006605                             |     | 1.3448823802972e-06                                                 | 10.3853598014888 | 1.14801743823957  |
| 9                                      | 474 | protein targeting                                                   |                  |                   |
| GO:0071845                             |     | 4.41264252702976e-06                                                | 12.7608303249097 | 0.687841671856619 |
| 7                                      | 284 | cellular component disassembly at cellular level                    |                  |                   |
| GO:0022411                             |     | 4.83831668235229e-06                                                | 12.5756227758007 | 0.697529582727839 |
| 7                                      | 288 | cellular component disassembly                                      |                  |                   |
| GO:0034470                             |     | 7.57338935750658e-06                                                | 15.1674369001066 | 0.484395543560999 |
| 6                                      | 200 | ncRNA processing                                                    |                  |                   |
| GO:0016032                             |     | 9.48070968541251e-06                                                | 9.34570688069559 | 1.09231195073005  |
| 8                                      | 451 | viral reproduction                                                  |                  |                   |
| Tissue: Artery_Tibial=>Muscle_Skeletal |     | Type: asymmetric                                                    |                  |                   |

SourceGene: ANGPTL1(ENSG00000116194.7) angiopoietin-like 1

STable4\_20PerPair

|                |         |          |         |        |         |         |        |          |          |      |
|----------------|---------|----------|---------|--------|---------|---------|--------|----------|----------|------|
| TargetGeneSet: | GPR153  | PHF13    | TMEM201 | NMNAT1 | RP11    | PTAFR   | ZMYM1  | GPX6     |          |      |
| FAM159A        | MYSM1   | SH3GLB1  | SELE    | DNM3OS | SYT14   | SDCCAG8 | KCNK3  | SUPT7L   | MAP4K4   |      |
| NFE2L2         | SLC11A1 | COL6A3   | TIMP4   | TMEM43 | ABHD14A | ACY1    | PTPRG  | DBR1     | TM4SF1   |      |
| SNORA63        | ATP13A4 | IL8      | G3BP2   | NFKB1  | GAB1    | ZNF827  | CLCN3  | NLN      | PIK3R1   |      |
| ZNF225         | HBEGF   | FGF18    | COL23A1 | JARID2 | FKBP5   | PIM1    | ENPP4  | COQ3     | GJA1     |      |
| PDGFA          | MAFK    | KBTBD2   | POR     | LAMB1  | PODXL   | EPHB6   | GIMAP6 | CTD      | RNF122   |      |
| C8orf4         | GEM     | NIPAL2   | U6      | HAS2   | DENND3  | GADD45G | AIF1L  | LCN6     | GATA3    | RIN2 |
| CSTF2T         | EGR2    | KIAA1274 |         | PANK1  | CHST15  | DAGLA   | NAA40  | RELT     | FZD4     |      |
| SLC2A3         | MFAP5   | TSPAN31  | IGF1    | TDG    | GPR133  | MRPS31  | FOS    | POMT2    | CSPG4    |      |
| NARFL          | TMEM204 | NPIP     | EEF2K   | PALB2  | CX3CL1  | ZNRF1   | TAF1C  | RP4      | RAP1GAP2 |      |
| CCL2           | C1QTNF1 | CCDC57   | SLC16A3 | RNF125 | IZUMO4  | CYP4F22 | HIF3A  | PPP1R15A |          |      |
| UBOX5          | RBM38   | JAM2     | DGCR2   | GGT5   | DNAL4   | RPA4    | CSTF2  |          |          |      |

|        |        |           |          |       |      |      |
|--------|--------|-----------|----------|-------|------|------|
| GOBPID | Pvalue | OddsRatio | ExpCount | Count | Size | Term |
|--------|--------|-----------|----------|-------|------|------|

|            |          |             |             |    |     |                                      |
|------------|----------|-------------|-------------|----|-----|--------------------------------------|
| GO:2000147 | 5.93E-08 | 10.11642857 | 1.284893779 | 11 | 211 | positive regulation of cell motility |
|------------|----------|-------------|-------------|----|-----|--------------------------------------|

|            |          |             |             |    |     |                                   |
|------------|----------|-------------|-------------|----|-----|-----------------------------------|
| GO:0040017 | 7.90E-08 | 9.817614424 | 1.321431043 | 11 | 217 | positive regulation of locomotion |
|------------|----------|-------------|-------------|----|-----|-----------------------------------|

|            |          |             |             |    |     |                                                    |
|------------|----------|-------------|-------------|----|-----|----------------------------------------------------|
| GO:0051272 | 8.67E-08 | 9.721840659 | 1.333610131 | 11 | 219 | positive regulation of cellular component movement |
|------------|----------|-------------|-------------|----|-----|----------------------------------------------------|



STable4\_20PerPair

|                                       |          |             |             |    |     |
|---------------------------------------|----------|-------------|-------------|----|-----|
| GO:0030335                            | 5.00E-07 | 9.219055057 | 1.260535603 | 10 | 207 |
| positive regulation of cell migration |          |             |             |    |     |
| GO:0070555                            | 3.47E-06 | 16.87765539 | 0.41408899  | 6  | 68  |
| response to interleukin-1             |          |             |             |    |     |
| GO:0071347                            | 6.72E-06 | 22.12542478 | 0.267939935 | 5  | 44  |
| cellular response to interleukin-1    |          |             |             |    |     |
| GO:0050900                            | 1.56E-05 | 6.939054998 | 1.467580098 | 9  | 241 |
| leukocyte migration                   |          |             |             |    |     |

GO:0043491      1.66E-05      <sup>STable4\_20PerPair</sup> 12.58889215      0.541969414      6      89  
 protein kinase B signaling cascade

GO:0051897      1.87E-05      17.59773789      0.328835375      5      54  
 positive regulation of protein kinase B signaling cascade

Tissue: Muscle\_Skeletal=>Artery\_Tibial    Type:    asymmetric

SourceGene:      DNAH11(ENSG00000105877.12)

TargetGeneSet:    MECR      NFASC      MDH1      MXD1      SLC25A12      NDUFB3      EPHA6      RP11  
 TIMMDC1 HCLS1    TM4SF1-AS1    ZAR1      CCNI      PRDM8      WDFY3-AS2    PCDH10    CTD  
 SKP2      F2R      FNIP1      UQCRQ    GRIA1      RANBP17    SH3PXD2B      HLA-F-AS1  
 LAMA4      NDUFA4    C9orf123      TLR4      H2AFY2    KIAA1274      POU6F1      MTIF3  
 LACC1      TRAV9-2    KIF7      LSMD1      MMP28      SLC14A1    NDUFA7      GMIP      C20orf118  
 ARFGEF2    ATP5J      LANCL3      PDZD11    COX7B      PCDH11X

GOBPID    Pvalue    OddsRatio      ExpCount      Count    Size    Term

GO:0045333      1.34E-09      31.57987839      0.343920836      8      142  
 cellular respiration

GO:0022904      2.64E-09      40.24438202      0.232509861      7      96  
 respiratory electron transport chain

STable4\_20PerPair

|                                                     |          |             |             |   |     |
|-----------------------------------------------------|----------|-------------|-------------|---|-----|
| GO:0022900                                          | 2.73E-08 | 28.12795276 | 0.324545014 | 7 | 134 |
| electron transport chain                            |          |             |             |   |     |
| GO:0015980                                          | 5.41E-07 | 13.98934721 | 0.743547159 | 8 | 307 |
| energy derivation by oxidation of organic compounds |          |             |             |   |     |
| GO:0006091                                          | 6.46E-06 | 9.87372134  | 1.036606463 | 8 | 428 |
| generation of precursor metabolites and energy      |          |             |             |   |     |

Tissue: Artery\_Tibial=>Muscle\_Skeletal Type: asymmetric

SourceGene: ENSG00000260884.1 AC009120.5 (novel lincRNA)

TargetGeneSet: MTND1P23 RPL22 CELA2A WDTC1 MFI2 KDM4A RP4  
RPS27 C1orf192 PRRC2C OBSCN UBC IGKV1-5 RPL31 ORMDL1 EEF1B2  
GIGYF2 RAD54L2 RPL29 RPL24 COPG1 RP11 RPL35A BOD1L LGALS13 RPL34  
H3F3AP6 RPS3A RPL37 CHCHD2P2 BTF3 NSA2 MAN2A1 CTD CTB  
MTND5P11 GFOD1-AS1 RPS18 RPL10A UBR2 MTRNR2L9 MRPS12  
FOXK1 FBXL18 HIP1 RPS3AP26 TRIM56 PRSS3P2 RPS20 RPL30 EIF3E  
FAM91A1 NFIB PCSK5 FAM35B POLR3A HIF1AN FBXL15 OR52E8 RPL27A MTRNR2L8  
RPS13 MS4A1 RPL37P2 C11orf73 MMP1 RPS25 SNX19 MLL4 SPRYD3  
PFDN5 VPS29 C12orf51 GCN1L1 RPLP0 RPSAP54 PARP4-AS1 KCTD4 TPT1  
ZC3H13 LPAR6 CHD8 U6 C14orf166 IGHD GOLGA8IP HERC2  
RPS3AP47 SPG11 POLR2M RPS3AP6 HERC1 RPL4 RPL13 TOM1L2 MTRNR2L1  
RPS7P1 RPL23A TBC1D3H RPL27 DHX8 RPS2P48 TNRC6C ROCK1P1 IER3IP1 ZNF737  
KCNK6 CEACAM5 SULT2B1 KLK1 RPS5 BFSP1 CEP250 ZNFX1 PEX26 NF2  
LDOC1L GNL3L ZC3H12B MED12 RPL36A RPL39 FLNA MT

STable4\_20PerPair

| GOBPID                                                                | Pvalue   | OddsRatio | ExpCount    | Count       | Size | Term |
|-----------------------------------------------------------------------|----------|-----------|-------------|-------------|------|------|
| GO:0006414                                                            | 4.81E-34 |           | 71.99596774 | 0.632136184 | 25   | 105  |
| translational elongation                                              |          |           |             |             |      |      |
| GO:0006415                                                            | 7.10E-34 |           | 81.29068941 | 0.54785136  | 24   | 91   |
| translational termination                                             |          |           |             |             |      |      |
| GO:0000184                                                            | 1.54E-32 |           | 61.21310913 | 0.716421009 | 25   | 119  |
| "nuclear-transcribed mRNA catabolic process, nonsense-mediated decay" |          |           |             |             |      |      |
| GO:0006614                                                            | 3.37E-32 |           | 67.17460317 | 0.632136184 | 24   | 105  |
| SRP-dependent cotranslational protein targeting to membrane           |          |           |             |             |      |      |

STable4\_20PerPair

|                                               |          |             |             |    |     |
|-----------------------------------------------|----------|-------------|-------------|----|-----|
| GO:0006613                                    | 4.33E-32 | 66.35075494 | 0.638156529 | 24 | 106 |
| cotranslational protein targeting to membrane |          |             |             |    |     |

|                         |          |             |             |    |     |
|-------------------------|----------|-------------|-------------|----|-----|
| GO:0045047              | 4.33E-32 | 66.35075494 | 0.638156529 | 24 | 106 |
| protein targeting to ER |          |             |             |    |     |

|                                                                |          |             |             |    |     |
|----------------------------------------------------------------|----------|-------------|-------------|----|-----|
| GO:0072599                                                     | 4.33E-32 | 66.35075494 | 0.638156529 | 24 | 106 |
| establishment of protein localization to endoplasmic reticulum |          |             |             |    |     |

|                                               |          |             |             |    |     |
|-----------------------------------------------|----------|-------------|-------------|----|-----|
| GO:0070972                                    | 7.36E-31 | 57.83181358 | 0.710400664 | 24 | 118 |
| protein localization to endoplasmic reticulum |          |             |             |    |     |

|            |          |             |             |    |     |
|------------|----------|-------------|-------------|----|-----|
| GO:0006413 | 1.14E-29 | 45.20256541 | 0.915092381 | 25 | 152 |
|------------|----------|-------------|-------------|----|-----|

STable4\_20PerPair

translational initiation

GO:0006612 1.36E-29 44.84627016 0.921112726 25 153  
 protein targeting to membrane

GO:0000956 1.87E-28 39.81854839 1.01743824 25 169  
 nuclear-transcribed mRNA catabolic process

GO:0019080 4.26E-28 42.70566179 0.909072037 24 151  
 viral genome expression

GO:0019083 4.26E-28 42.70566179 0.909072037 24 151  
 viral transcription

STable4\_20PerPair

|                                                    |          |             |             |    |     |      |
|----------------------------------------------------|----------|-------------|-------------|----|-----|------|
| GO:0043624                                         | 5.94E-28 | 42.03765227 | 0.921112726 | 24 | 153 |      |
| cellular protein complex disassembly               |          |             |             |    |     |      |
| GO:0006402                                         | 7.29E-28 | 37.45256167 | 1.071621341 | 25 | 178 | mRNA |
| catabolic process                                  |          |             |             |    |     |      |
| GO:0043241                                         | 1.34E-27 | 40.45486851 | 0.951214449 | 24 | 158 |      |
| protein complex disassembly                        |          |             |             |    |     |      |
| GO:0034623                                         | 1.52E-26 | 36.09904762 | 1.047539963 | 24 | 174 |      |
| cellular macromolecular complex disassembly        |          |             |             |    |     |      |
| GO:0072594                                         | 2.50E-26 | 31.95395567 | 1.228150301 | 25 | 204 |      |
| establishment of protein localization to organelle |          |             |             |    |     |      |

STable4\_20PerPair

|                                    |          |             |             |    |     |     |
|------------------------------------|----------|-------------|-------------|----|-----|-----|
| GO:0006401                         | 2.84E-26 | 31.77419355 | 1.234170646 | 25 | 205 | RNA |
| catabolic process                  |          |             |             |    |     |     |
| GO:0032984                         | 3.08E-26 | 34.92227343 | 1.077641686 | 24 | 179 |     |
| macromolecular complex disassembly |          |             |             |    |     |     |
| GO:0019058                         | 6.02E-25 | 27.71296586 | 1.390699606 | 25 | 231 |     |
| viral infectious cycle             |          |             |             |    |     |     |
| GO:0022415                         | 1.20E-23 | 24.24330817 | 1.565289599 | 25 | 260 |     |
| viral reproductive process         |          |             |             |    |     |     |



STable4\_20PerPair

GO:0071845 1.09E-22 21.95945946 1.70977787 25 284  
 cellular component disassembly at cellular level

GO:0022411 1.55E-22 21.61934257 1.733859248 25 288  
 cellular component disassembly

GO:0033365 1.46E-19 14.04282511 2.847623002 27 473  
 protein localization to organelle

GO:0006605 1.54E-19 14.01040268 2.853643346 27 474  
 protein targeting

GO:0016032 8.53E-18 13.19286688 2.71517542 25 451  
 viral reproduction

STable4\_20PerPair

Tissue: Artery\_Tibial=>Muscle\_Skeletal Type: asymmetric

SourceGene: GAS8(ENSG00000141013.10) growth arrest-specific 8

| GOBPID         | Pvalue  | OddsRatio | ExpCount | Count    | Size     | Term     |           |          |          |      |
|----------------|---------|-----------|----------|----------|----------|----------|-----------|----------|----------|------|
| TargetGeneSet: | FAM41C  | H6PD      | SNRNP40  | IPP      | ALG6     | SGIP1    | RP11      | GAPDHP32 |          |      |
| EFNA4          | MSTO1   | B4GALT3   | HSPA6    | POU2F1   | TOR1AIP1 | ZNF678   | JMJD4     | RNASEH1  |          |      |
| IGKJ4          | ARL6IP6 | ICA1L     | CRBN     | GHRL     | KIAA1143 | MON1A    | PROS1     | TMEM45A  |          |      |
| ZDHHC23        | CCNL1   | H1FX      | PLD1     | DCAF16   | SLC30A9  | POLR2B   | ENAM      | EXOSC9   | GARS     |      |
| FHDC1          | LPCAT1  | CTD       | ZFR      | SKP2     | YTHDC2   | HNRNPA0  | IK        | GALNT10  | NHLRC1   |      |
| TOB2P1         | TRIM39  | VPS52     | MAPK13   | RP1      | SCAF8    | TATDN2P2 | WDR27     | AP5Z1    |          |      |
| WIPI2          | CCDC126 | GPC2      | SPDYE3   | CTA      | C8orf42  | PPP2R2A  | BRF2      | RNF170   | KIAA0196 |      |
| ZNF7           | RCL1    | SLC44A1   | C9orf148 |          | STXBP1   | C9orf106 |           | USP20    | NUP214   |      |
| SEC16A         | FAM21C  | STOX1     | RRP12    | C10orf32 |          | PLEKHA1  | BET1L     | ART1     | CHRNA10  | RIC3 |
| PPP2R5B        | SART1   | ANKRD13D  |          | ATG16L2  | SRSF8    | TTC12    | RPL23AP64 |          | NPFF     |      |
| THAP2          | ANO4    | PLBD2     | FBXO21   | TPTE2    | CDK8     | MTRF1    | LINC00452 |          | C14orf21 |      |
| ZBTB1          | ATPBD4  | GCHFR     | ZFYVE19  | CLPX     | U6       | FAM103A1 | ZNF75A    |          | DOC2A    | FUS  |
| MMP15          | SETD6   | CMC2      | GAS8     | PIGS     | SUPT6H   | TP53I13  | NSRP1     | PGAP3    | GSDMB    |      |
| H3F3B          | ZNF236  | C19orf6   | CIRBP    | VMAC     | TNFSF14  | MEF2BNB  | ZNF681    | ZNF30    | HNRNPL   |      |
| MED29          | SUPT5H  | HNRNPUL1  |          | TSKS     | C19orf48 |          | PPP2R1A   | LENG8    | ZNF324B  |      |
| C20orf96       |         | FAM110A   | UBOX5    | RP4      | CDH4     | PRPF6    | IGLL5     | IGLC1    | PES1     | H1FO |
| 7SK            | GSPT2   | TSR2      | ACRC     |          |          |          |           |          |          |      |

STable4\_20PerPair

|                                                                                                 |          |             |             |    |     |      |
|-------------------------------------------------------------------------------------------------|----------|-------------|-------------|----|-----|------|
| GO:0008380<br>splicing                                                                          | 6.72E-07 | 6.328650711 | 2.369247803 | 13 | 323 | RNA  |
| GO:0006397<br>processing                                                                        | 1.25E-06 | 5.517786561 | 2.926717874 | 14 | 399 | mRNA |
| GO:0000377<br>splicing, via transesterification reactions with bulged adenosine as nucleophile" | 2.47E-06 | 7.598260309 | 1.496367033 | 10 | 204 | "RNA |
| GO:0000398<br>"nuclear mRNA splicing, via spliceosome"                                          | 2.47E-06 | 7.598260309 | 1.496367033 | 10 | 204 |      |

STable4\_20PerPair

GO:0000375 3.07E-06 7.404731993 1.533042696 10 209 "RNA splicing, via transesterification reactions"

Tissue: Artery\_Tibial=>Muscle\_Skeletal Type: asymmetric  
 SourceGene: KRT8P46(ENSG00000248971.1)  
 TargetGeneSet: FAM41C IPP RP11 JTB RABIF RNASEH1 EMX1 DCAF17 MREG  
 CRBN KIAA1143 CTD UBA3 C3orf58 METTL15P1 PHC3 AFAP1  
 RG9MTD2 RPS3A SKP2 TTC37 RAPGEF6 IK CDKAL1 ZNF192 WDR11 SNX14  
 USP45 DCBLD1 SCAF8 TATDN2P2 FOXK1 GLCCI1 RALA TMEM60 C8orf42  
 PPP2R2A BRF2 RALGAPA1P USP20 NUP214 RPL7A SEC16A DUPD1 GBF1  
 SART1 NPFF THAP2 NOC4L CDK8 EBPL ALG11 C14orf21 HERC2  
 HERC1 FAM108C1 NMB CCDC113 TOM1L2 SUPT6H TAOK1 DHX8 SLC16A5 SGSH  
 METTL4 GNA11 HSH2D DDA1 RYR1 MED29 SUPT5H DYRK1B HNRNPUL1 RP4  
 TGM2 PRPF6 SON MCM5 RAB9A RBM10 SUV39H1 TSR2 APOOL RPL39  
 IDH3G  
 GOBPID Pvalue OddsRatio ExpCount Count Size Term  
 Tissue: Muscle\_Skeletal=>Artery\_Tibial Type: asymmetric

SourceGene: MTRNR2L1(ENSG00000256618.1) MT-RNR2-like 1

STable4\_20PerPair

|                |          |         |        |            |          |           |         |          |           |      |
|----------------|----------|---------|--------|------------|----------|-----------|---------|----------|-----------|------|
| TargetGeneSet: | MTND2P28 | ISG15   | DFFA   | CELA2A     | CHCHD2P6 | EIF1AX    | RP1     |          |           |      |
| CELA3B         | CELA3A   | PHACTR4 | YRDC   | MFI2       | CLDN19   | AMY2A     | CLCC1   | TARS2    | JTB       |      |
| RPS27          | VAMP4    | ZBTB37  | RP11   | PIGR       | PTPN14   | PREPL     | EPCAM   | CEP68    | AAK1      |      |
| REG1B          | REG1A    | REG3A   | POLR1A | EIF5B      | H3F3AP4  | ORMDL1    | TRIP12  | HDLBP    | NR2C2     | CTD  |
| ZBTB20         | STAG1    | CPB1    | MIR943 | ABLIM2     | FRG1     | NUP155    | CTB     | MTND5P11 |           |      |
| PCDHGA5        | GEMIN5   | CLPS    | FTH1P5 | MTRNR2L9   |          | WDR11     | PHACTR2 | IYD      | PHF14     |      |
| STK31          | CBX3     | NUDCD3  | TRIM56 | CPA2       | CPA1     | BRAF      | PRSS1   | PRSS3P1  | PRSS3P2   |      |
| MTMR9          | VAT1     | ELP3    | PRKDC  | NFIB       | PRSS3    | RGP1      | ZNF462  | ARPC5L   | C9orf16   |      |
| ATOH7          | FBXL15   | PDCD11  | PNLIP  | SLC22A18AS |          | OR52E8    | NAT10   | TRIM44   | CKAP5     | DDB1 |
| DLAT           | SLC38A1  | RP3     | DAZAP2 | HIGD1AP1   |          | PLA2G1B   | STRN3   | KLHL28   | L2HGDH    |      |
| YLPM1          | GOLGA8IP |         | USP8   | MYO9A      | IQGAP1   | RPL21P119 |         | GP2      | LONP2     |      |
| SLC12A4        | NFATC3   | CHTF8   | CTRB2  | CTRB1      | VPS53    | TSR1      | RNASEK  | MYH1     | TAOK1     | LIG3 |
| CDC27          | KPNB1    | DYNLL2  | RNF126 | ALKBH7     | TRAPPC5  | ADAMTS10  |         | SYCN     | LINC00085 |      |
| RBPJL          | URB1     | CBR3    | NBEAP3 | FAM108A5P  |          | CTA       | GS1     | HUWE1    | PAGE2B    |      |
| RPL39          | MT       |         |        |            |          |           |         |          |           |      |

|        |        |           |          |       |      |      |
|--------|--------|-----------|----------|-------|------|------|
| GOBPID | Pvalue | OddsRatio | ExpCount | Count | Size | Term |
|--------|--------|-----------|----------|-------|------|------|

|                         |          |             |             |   |     |  |
|-------------------------|----------|-------------|-------------|---|-----|--|
| GO:0007586<br>digestion | 7.23E-08 | 13.78935484 | 0.769358522 | 9 | 109 |  |
|-------------------------|----------|-------------|-------------|---|-----|--|

Tissue: Muscle\_skeletal=>Artery\_Tibial Type: asymmetric

SourceGene: PABPC3(ENSG00000151846.6) "poly(A) binding protein, cytoplasmic 3"

STable4\_20PerPair

TargetGeneSet: CELA2B ZMYM1 TXNIP GLUL SUCLG1 SLC25A12 NIF3L1 ING5  
 PDHB GTF2E1 KLF15 C3orf70 RASL11B ARL9 AREG USP53 ARHGAP26  
 ADRA1B LY6G6C MED20 GAPDHP15 LYRM2 FAXC QRSL1 LAMA4 RP1 RP11  
 UST FAM103A2P NDUFA4 MEOX2 ACN9 PMS2P1 NEIL2 VDAC3 LAPTM4B  
 DENND3 RANBP6 ALDH1B1 KLF9 TLR4 CISD1 ADO NODAL SLC16A12  
 FAM118B COPS7A COX14 TSFM IRAK3 TPCN1 ZCCHC8 SFSWAP QRSL1P3 NID2  
 SLC25A29 ATP10A ARID3B CTD FAM108C1 IL16 IDH2 PER1  
 NDEL1 COX10 PSMB3 C17orf89 ATP5A1 NDUFA7 NXNL1 ITPKC RBM39  
 ARFGAP3 KLHL13 NDUFA1

| GOBPID     | Pvalue   | OddsRatio | ExpCount    | Count       | Size | Term                                                       |
|------------|----------|-----------|-------------|-------------|------|------------------------------------------------------------|
| GO:0045333 | 1.22E-10 |           | 24.01346801 | 0.540447028 | 10   | 142<br>cellular respiration                                |
| GO:0015980 | 1.73E-08 |           | 11.90878378 | 1.16843125  | 11   | 307<br>energy derivation by oxidation of organic compounds |
| GO:0006091 | 5.00E-07 |           | 8.380695444 | 1.628953014 | 11   | 428<br>generation of precursor metabolites and energy      |
| GO:0022904 | 1.64E-06 |           | 19.46394558 | 0.365372639 | 6    | 96<br>respiratory electron transport chain                 |
| GO:0022900 | 1.13E-05 |           | 13.64923469 | 0.509999308 | 6    | 134<br>electron transport chain                            |

STable4\_20PerPair

GO:0009060 1.89E-05 29.63467492 0.159850529 4 42  
aerobic respiration

Tissue: Artery\_Tibial=>Muscle\_Skeletal Type: asymmetric

SourceGene: PPIG(ENSG00000138398.10) peptidylprolyl isomerase G  
(cyclophilin G)

TargetGeneSet: MINOS1 TMSB4XP1 APOA1BP RP4 LBR GNPAT RP11  
MRPL33 MDH1 SLC1A4 TPRKB SUCLG1 NDUFB3 COL4A3 GIGYF2 ABHD14A CCNL1  
CKMT2 IK MNF1 PHACTR2 WDR27 EEF1A1P6 RPS2P32 CYCS GATS  
NDUFA5 WASL MRPS33 GSTK1 KIAA0196 ST13P6 ERP44 MRPL41 FAM21C  
NDUFB8 GBF1 NRAP PLEKHA1 SART1 NDUFS8 C11orf73 SDHD LIN7A  
NDUFA12 SLC25A3 LINC00441 ARHGEF7-IT1 C14orf21 FOXN3 GLRX5  
COX5A NDUFB10 GOT2 CA7 SUPT6H TP53I13 ATP5G1 NDUFV2 CCDC68 ATP5D  
WDR88 SUPT5H ESF1 PRPF6 ATP5J C21orf33 RAB9A

GOBPID Pvalue OddsRatio ExpCount Count Size Term

GO:0045333 1.19E-18 45.5586295 0.510968099 15 142  
cellular respiration

GO:0022904 1.09E-17 57.4939759 0.345443222 13 96  
respiratory electron transport chain

STable4\_20PerPair

|                                                        |          |             |             |    |     |     |
|--------------------------------------------------------|----------|-------------|-------------|----|-----|-----|
| GO:0022900                                             | 9.67E-16 | 39.33333333 | 0.482181164 | 13 | 134 |     |
| electron transport chain                               |          |             |             |    |     |     |
| GO:0015980                                             | 1.27E-13 | 19.58580155 | 1.104698637 | 15 | 307 |     |
| energy derivation by oxidation of organic compounds    |          |             |             |    |     |     |
| GO:0006091                                             | 1.04E-12 | 15.08845739 | 1.540101031 | 16 | 428 |     |
| generation of precursor metabolites and energy         |          |             |             |    |     |     |
| GO:0006119                                             | 2.68E-11 | 52.17818182 | 0.20870528  | 8  | 58  |     |
| oxidative phosphorylation                              |          |             |             |    |     |     |
| GO:0042773                                             | 2.89E-10 | 55.84055556 | 0.169123244 | 7  | 47  | ATP |
| synthesis coupled electron transport                   |          |             |             |    |     |     |
| GO:0042775                                             | 2.89E-10 | 55.84055556 | 0.169123244 | 7  | 47  |     |
| mitochondrial ATP synthesis coupled electron transport |          |             |             |    |     |     |
| GO:0006120                                             | 2.89E-09 | 62.47391304 | 0.129541208 | 6  | 36  |     |
| "mitochondrial electron transport, NADH to ubiquinone" |          |             |             |    |     |     |



GO:0042776      1.23E-05      Stable4\_20PerPair      88.09591837      0.04677877      3      13  
 mitochondrial ATP synthesis coupled proton transport

Tissue: Artery\_Tibial=>Muscle\_Skeletal Type: asymmetric

SourceGene: PVRL3-AS1(ENSG00000242242.1) PVRL3 antisense RNA 1 (MISC RNA)

TargetGeneSet: PPIH MRPL9 RP11 LRRN2 DYNC2LI1 UBC MPHOSPH10  
 RPL31 METTL5 RPL37A FAM208A RPL24 RAB6B PARL RPL35A FRYL RPL34  
 BRIX1 RPL37 MAN2A1 NOL7 PRRC2A NOTCH4 RPL10A C6orf57 L3MBTL3 MRPS12  
 PNLDC1 PINX1 HOOK3 RPS20 C8orf59 RPL30 POLR2K RPS13 C11orf10  
 RCOR2 FAU RPS25 ERC1 RPL41 RAP2A ARHGEF7-AS2 HEATR5A ERH  
 ADAM20 BTBD7 UNC45A FBXL19 GIT1 TMEM106A PPP1R9B SOGA2 C18orf21  
 SNRPD2 MID1 NKAP RPL7P56 PLXNA3

GOBPID Pvalue OddsRatio ExpCount Count Size Term

GO:0006415      5.35E-21      86.84848485      0.277074251      14      91  
 translational termination

GO:0006414      4.47E-20      73.41538462      0.319701059      14      105  
 translational elongation

GO:0006614      4.47E-20      73.41538462      0.319701059      14      105  
 SRP-dependent cotranslational protein targeting to membrane

|                                                                       |          | STable4_20PerPair |             |    |     |
|-----------------------------------------------------------------------|----------|-------------------|-------------|----|-----|
| GO:0006613                                                            | 5.15E-20 | 72.61231884       | 0.322745831 | 14 | 106 |
| cotranslational protein targeting to membrane                         |          |                   |             |    |     |
| GO:0045047                                                            | 5.15E-20 | 72.61231884       | 0.322745831 | 14 | 106 |
| protein targeting to ER                                               |          |                   |             |    |     |
| GO:0072599                                                            | 5.15E-20 | 72.61231884       | 0.322745831 | 14 | 106 |
| establishment of protein localization to endoplasmic reticulum        |          |                   |             |    |     |
| GO:0019080                                                            | 1.69E-19 | 54.27611562       | 0.45976057  | 15 | 151 |
| viral genome expression                                               |          |                   |             |    |     |
| GO:0019083                                                            | 1.69E-19 | 54.27611562       | 0.45976057  | 15 | 151 |
| viral transcription                                                   |          |                   |             |    |     |
| GO:0043624                                                            | 2.07E-19 | 53.482009         | 0.465850114 | 15 | 153 |
| cellular protein complex disassembly                                  |          |                   |             |    |     |
| GO:0070972                                                            | 2.48E-19 | 64.18012821       | 0.359283095 | 14 | 118 |
| protein localization to endoplasmic reticulum                         |          |                   |             |    |     |
| GO:0000184                                                            | 2.81E-19 | 63.56444444       | 0.362327867 | 14 | 119 |
| "nuclear-transcribed mRNA catabolic process, nonsense-mediated decay" |          |                   |             |    |     |

STable4\_20PerPair

|                                             |          |             |             |    |     |      |
|---------------------------------------------|----------|-------------|-------------|----|-----|------|
| GO:0043241                                  | 3.39E-19 | 51.59392332 | 0.481073974 | 15 | 158 |      |
| protein complex disassembly                 |          |             |             |    |     |      |
| GO:0034623                                  | 1.49E-18 | 46.35003253 | 0.529790326 | 15 | 174 |      |
| cellular macromolecular complex disassembly |          |             |             |    |     |      |
| GO:0032984                                  | 2.30E-18 | 44.92115223 | 0.545014186 | 15 | 179 |      |
| macromolecular complex disassembly          |          |             |             |    |     |      |
| GO:0006413                                  | 9.67E-18 | 48.252657   | 0.462805342 | 14 | 152 |      |
| translational initiation                    |          |             |             |    |     |      |
| GO:0006612                                  | 1.06E-17 | 47.90215827 | 0.465850114 | 14 | 153 |      |
| protein targeting to membrane               |          |             |             |    |     |      |
| GO:0000956                                  | 4.40E-17 | 42.90924731 | 0.514566466 | 14 | 169 |      |
| nuclear-transcribed mRNA catabolic process  |          |             |             |    |     |      |
| GO:0006402                                  | 9.20E-17 | 40.52886179 | 0.541969414 | 14 | 178 | mRNA |
| catabolic process                           |          |             |             |    |     |      |
| GO:0019058                                  | 1.10E-16 | 33.98227969 | 0.703342329 | 15 | 231 |      |
| viral infectious cycle                      |          |             |             |    |     |      |

STable4\_20PerPair

|                                                    |          |             |             |    |     |     |
|----------------------------------------------------|----------|-------------|-------------|----|-----|-----|
| GO:0072594                                         | 6.31E-16 | 34.91894737 | 0.621133486 | 14 | 204 |     |
| establishment of protein localization to organelle |          |             |             |    |     |     |
| GO:0022415                                         | 6.46E-16 | 29.89866291 | 0.791640717 | 15 | 260 |     |
| viral reproductive process                         |          |             |             |    |     |     |
| GO:0006401                                         | 6.76E-16 | 34.73368237 | 0.624178258 | 14 | 205 | RNA |
| catabolic process                                  |          |             |             |    |     |     |
| GO:0071845                                         | 2.40E-15 | 27.18497629 | 0.864715245 | 15 | 284 |     |
| cellular component disassembly at cellular level   |          |             |             |    |     |     |
| GO:0022411                                         | 2.96E-15 | 26.77908299 | 0.876894333 | 15 | 288 |     |
| cellular component disassembly                     |          |             |             |    |     |     |
| GO:0016032                                         | 2.07E-12 | 16.57426447 | 1.373192167 | 15 | 451 |     |
| viral reproduction                                 |          |             |             |    |     |     |
| GO:0033365                                         | 4.09E-12 | 15.75327511 | 1.44017715  | 15 | 473 |     |
| protein localization to organelle                  |          |             |             |    |     |     |
| GO:0006605                                         | 6.43E-11 | 14.14913043 | 1.443221922 | 14 | 474 |     |
| protein targeting                                  |          |             |             |    |     |     |

STable4\_20PerPair

Tissue: Artery\_Tibial=>Muscle\_Skeletal Type: asymmetric

SourceGene: RAB32(ENSG00000118508.4) "RAB32, member RAS oncogene family"

TargetGeneSet: RP1 UBC RPL31 EEF1B2 RPL37A RP11 RPL35A RPL34 LSM6  
 CTD MRPS12 RPS20 U6 RPS13 RPS25 PFDN5 RPL41 HERC2 NDNL2  
 RPS3AP6 MED31 RPL23A RPL27 RPS5 EEF1B2P3

| GOBPID                                                                | Pvalue   | OddsRatio | ExpCount    | Count       | Size | Term |
|-----------------------------------------------------------------------|----------|-----------|-------------|-------------|------|------|
| GO:0006414                                                            | 1.42E-23 |           | 253.2527174 | 0.152584596 | 13   | 105  |
| translational elongation                                              |          |           |             |             |      |      |
| GO:0006415                                                            | 5.14E-22 |           | 242.2109705 | 0.132239983 | 12   | 91   |
| translational termination                                             |          |           |             |             |      |      |
| GO:0006614                                                            | 3.15E-21 |           | 205.5483871 | 0.152584596 | 12   | 105  |
| SRP-dependent cotranslational protein targeting to membrane           |          |           |             |             |      |      |
| GO:0006613                                                            | 3.55E-21 |           | 203.3475177 | 0.154037783 | 12   | 106  |
| cotranslational protein targeting to membrane                         |          |           |             |             |      |      |
| GO:0045047                                                            | 3.55E-21 |           | 203.3475177 | 0.154037783 | 12   | 106  |
| protein targeting to ER                                               |          |           |             |             |      |      |
| GO:0072599                                                            | 3.55E-21 |           | 203.3475177 | 0.154037783 | 12   | 106  |
| establishment of protein localization to endoplasmic reticulum        |          |           |             |             |      |      |
| GO:0000956                                                            | 9.00E-21 |           | 148.6875    | 0.245588541 | 13   | 169  |
| nuclear-transcribed mRNA catabolic process                            |          |           |             |             |      |      |
| GO:0070972                                                            | 1.37E-20 |           | 180.1761006 | 0.171476022 | 12   | 118  |
| protein localization to endoplasmic reticulum                         |          |           |             |             |      |      |
| GO:0000184                                                            | 1.52E-20 |           | 178.4797508 | 0.172929209 | 12   | 119  |
| "nuclear-transcribed mRNA catabolic process, nonsense-mediated decay" |          |           |             |             |      |      |

STable4\_20PerPair

|                                                    |          |             |             |    |     |      |
|----------------------------------------------------|----------|-------------|-------------|----|-----|------|
| GO:0006402                                         | 1.80E-20 | 140.4886364 | 0.25866722  | 13 | 178 | mRNA |
| catabolic process                                  |          |             |             |    |     |      |
| GO:0006401                                         | 1.18E-19 | 120.5039063 | 0.297903259 | 13 | 205 | RNA  |
| catabolic process                                  |          |             |             |    |     |      |
| GO:0019080                                         | 2.95E-19 | 137.0839329 | 0.219431181 | 12 | 151 |      |
| viral genome expression                            |          |             |             |    |     |      |
| GO:0019083                                         | 2.95E-19 | 137.0839329 | 0.219431181 | 12 | 151 |      |
| viral transcription                                |          |             |             |    |     |      |
| GO:0006413                                         | 3.20E-19 | 136.0952381 | 0.220884368 | 12 | 152 |      |
| translational initiation                           |          |             |             |    |     |      |
| GO:0006612                                         | 3.47E-19 | 135.1205674 | 0.222337554 | 12 | 153 |      |
| protein targeting to membrane                      |          |             |             |    |     |      |
| GO:0043624                                         | 3.47E-19 | 135.1205674 | 0.222337554 | 12 | 153 |      |
| cellular protein complex disassembly               |          |             |             |    |     |      |
| GO:0043241                                         | 5.16E-19 | 130.4474886 | 0.229603488 | 12 | 158 |      |
| protein complex disassembly                        |          |             |             |    |     |      |
| GO:0034623                                         | 1.69E-18 | 117.4320988 | 0.252854474 | 12 | 174 |      |
| cellular macromolecular complex disassembly        |          |             |             |    |     |      |
| GO:0032984                                         | 2.40E-18 | 113.8762475 | 0.260120407 | 12 | 179 |      |
| macromolecular complex disassembly                 |          |             |             |    |     |      |
| GO:0072594                                         | 1.19E-17 | 98.875      | 0.296450073 | 12 | 204 |      |
| establishment of protein localization to organelle |          |             |             |    |     |      |
| GO:0019058                                         | 5.41E-17 | 86.52054795 | 0.335686112 | 12 | 231 |      |
| viral infectious cycle                             |          |             |             |    |     |      |
| GO:0022415                                         | 2.27E-16 | 76.24731183 | 0.377828524 | 12 | 260 |      |
| viral reproductive process                         |          |             |             |    |     |      |
| GO:0071845                                         | 6.61E-16 | 69.40196078 | 0.412705003 | 12 | 284 |      |
| cellular component disassembly at cellular level   |          |             |             |    |     |      |

STable4\_20PerPair

|                                   |          |             |             |    |     |
|-----------------------------------|----------|-------------|-------------|----|-----|
| GO:0022411                        | 7.83E-16 | 68.37681159 | 0.41851775  | 12 | 288 |
| cellular component disassembly    |          |             |             |    |     |
| GO:0016032                        | 1.68E-13 | 42.49354594 | 0.65538717  | 12 | 451 |
| viral reproduction                |          |             |             |    |     |
| GO:0033365                        | 2.96E-13 | 40.40202458 | 0.687357276 | 12 | 473 |
| protein localization to organelle |          |             |             |    |     |
| GO:0006605                        | 3.04E-13 | 40.31168831 | 0.688810463 | 12 | 474 |
| protein targeting                 |          |             |             |    |     |

Tissue: Muscle\_Skeletal=>Artery\_Tibial Type: asymmetric

SourceGene: RP1-159M24.1(ENSG00000225580.2)

|                                                        |           |                      |                  |                   |          |                   |          |          |         |
|--------------------------------------------------------|-----------|----------------------|------------------|-------------------|----------|-------------------|----------|----------|---------|
| TargetGeneSet:                                         | PIK3CD    | CELA2B               | RP11             | MECR              | CRTC2    | MIR4426           | ODC1     | KLHL29   | RBKS    |
| RPLP0P6                                                | MAP4K3    | ASB3                 | TET3             | BTF3L4P2          | FARSB    | LSM3              | ZNF662   | KRBOX1   |         |
| RPL10AP6                                               |           | LMOD3                | DZIP3            | DDX50P2           | AASDH    | NDUFC1            | ANXA2P1  | CTD      | GPR150  |
| RNF145                                                 | CREBRF    | BNIP1                | SUMO2P1          | RPL24P4           | RP3      | LYRM2             | UFL1     | PMS2P1   | C7orf61 |
| C7orf60                                                | MRPS33    | AGAP3                | PPP3CC           | KIF13B            | TRIM55   | NDUFB9            | C9orf123 |          | FKTN    |
| SYNPO2L                                                | RP13      | COX15                | UROS             | CHST1             | CLNS1A   | C11orf70          |          | ATP5L    | SPA17   |
| NDUFA12                                                | RPS7P10   | C14orf39             |                  | NDUFB1            | C14orf2  | HMG2P5            | BMF      | FURIN    | MYLPF   |
| CCDC113                                                | PSMB10    | PPM1D                | WDR83            | SNRPB2            | C20orf43 |                   | OGFR     | COMT     | PNPLA4  |
| EEF1B2P3                                               |           | RPS2P55              | ITGB1BP2         |                   | COX7B    | DOCK11            | NDUFA1   |          |         |
| GOBPID                                                 | Pvalue    | OddsRatio            | ExpCount         | Count             | Size     | Term              |          |          |         |
| GO:0022904                                             | 8         | 3.5669491973475e-09  | 26.5417439703154 |                   |          | 0.37865891633797  |          |          |         |
| respiratory electron transport chain                   |           |                      |                  |                   |          |                   |          |          |         |
| GO:0022900                                             | 8         | 4.99586841258498e-08 | 18.4878522837706 |                   |          | 0.528544737388416 |          |          |         |
| electron transport chain                               |           |                      |                  |                   |          |                   |          |          |         |
| GO:0045333                                             | 8         | 7.84983626824484e-08 | 17.3743527261651 |                   |          | 0.560099647083247 |          |          |         |
| cellular respiration                                   |           |                      |                  |                   |          |                   |          |          |         |
| GO:0042773                                             | 5         | 1.07881748832632e-06 | 32.8571428571429 |                   |          | 0.185385094457131 |          |          |         |
| ATP synthesis coupled electron transport               |           |                      |                  |                   |          |                   |          |          |         |
| GO:0042775                                             | 5         | 1.07881748832632e-06 | 32.8571428571429 |                   |          | 0.185385094457131 |          |          |         |
| mitochondrial ATP synthesis coupled electron transport |           |                      |                  |                   |          |                   |          |          |         |
| GO:0006119                                             | 5         | 3.11798050635669e-06 | 26.0177793904209 |                   |          | 0.228773095287523 |          |          |         |
| oxidative phosphorylation                              |           |                      |                  |                   |          |                   |          |          |         |
| GO:0006120                                             | 36        | 1.16615178243753e-05 | 33.872641509434  | 0.141997093626739 |          |                   |          |          | 4       |
| mitochondrial electron transport, NADH to ubiquinone   |           |                      |                  |                   |          |                   |          |          |         |
| TargetGeneSet:                                         | HMG2      | SERINC2              | SFPQ             | PPIE              | RP3      | MUTYH             | CMPK1    | OSBPL9   |         |
| PRPF38A                                                | GNG12     | RP11                 | NSRP1P1          | FAM69A            | AGL      | NBPF6             | BCAS2    | MAN1A2   | RAB7L1  |
| SMYD2                                                  | ANKS1B    | CAPN2                | DEGS1            | ZRANB3            | COBLL1   | BBS5              | NCKAP1   | RPL7P14  | FARSB   |
| TMEM43                                                 | BTD       | OSBPL10              | ZDHHC3           | RBM5              | EIF4E3   | SCHIP1            | AP2M1    | CHRD     | CCDC50  |
| STK32B                                                 | CC2D2A    | MED28                | PARM1            | SH3D19            | HADHAP1  | FBXL7             | OXCT1    | ARL15    | MAP1B   |
| FBXL17                                                 | ERGIC1    | MAPK9                | MRPS18B          | SCUBE3            | NFYA     | MRPL2             | HSP90AB1 |          | SLC35B2 |
| FKBP9                                                  | DPY19L1   | ANKIB1               | MEPCE            | RBM28             | OPN1SW   | KCNH2             | NEIL2    | ZMAT4    | PTDSS1  |
| SMU1                                                   | VPS13A    | C9orf156             |                  | EXOSC2            | DDX31    | SURF6             | EDF1     | CHAF1B   | FAM35A  |
| ZFYVE27                                                | CWF19L1   | PDCD11               | C10orf137        |                   | BET1L    | OR51A9P           | FAM160A2 |          | NAT10   |
| PPME1                                                  | GDPD5     | FAT3                 | GUCY1A2          | DIXDC1            | SIDT2    | FEZ1              | WNT5B    | NECAP1   | ART4    |
| TMEM117                                                | CACNB3    | DCTN2                | GNS              | CHPT1             | SART3    | PLBD2             | CDK2AP1  | SETD8    | MTUS2   |
| RBM26                                                  | PRMT5-AS1 |                      | MED6             | EML1              | ULK4P3   | SLC30A4           | NEO1     | UBE2Q2   | HMG20A  |
| FANCI                                                  | C16orf91  |                      | TELO2            | NTAN1             | GDE1     | KIF22             | INO80E   | CCDC102A | AEN     |
| METTLL16                                               | SPAG5     | UTP6                 | SRSF1            | NAT9              | THOC1    | TTC39C            | MBD1     | FZR1     | HNRNPM  |

Stable4\_20PerPair

| GOBPID                                                              | Pvalue | OddsRatio | ExpCount             | Count            | Size              | Term                        |
|---------------------------------------------------------------------|--------|-----------|----------------------|------------------|-------------------|-----------------------------|
| GO:0006397                                                          | 16     | 399       | 4.68594899917893e-07 | 5.19955240581872 |                   | 3.53414988582105            |
| mRNA processing                                                     |        |           |                      |                  |                   |                             |
| Tissue: Artery_Tibial=>Muscle_Skeletal Type: asymmetric             |        |           |                      |                  |                   |                             |
| SourceGene: RP11-370B11.1(ENSG00000236739.2)                        |        |           |                      |                  |                   |                             |
| TargetGeneSet:                                                      | CELA2A | CELA3B    | CELA3A               | TMSB4XP1         | RP4               | AMYP1 RPS27                 |
| MIR4426                                                             | PTPN14 | PPP1CB    | RHOQ                 | MCM6             | RPL29             | CTBP1-AS1 RPL7AP31 ZFR      |
| RP11                                                                | CLPS   | MTRNR2L9  | EEF1A1P6             | TRIM56           | PRSS1             | YWHAZP3 PNLIP               |
| MTRNR2L8                                                            | CARD16 | LINC00441 | IGHA2                | GP2              | CTRB2             | CTRB1 ADAMTS18              |
| CYP2F1P                                                             | SON    | RP1       | WASF4P               | RP6              |                   |                             |
| GOBPID                                                              | Pvalue | OddsRatio | ExpCount             | Count            | Size              | Term                        |
| GO:0007586                                                          | 6      | 109       | 1.93179639713465e-08 | 46.3559870550162 |                   | 0.181025534565082           |
| digestion                                                           |        |           |                      |                  |                   |                             |
| Tissue: Artery_Tibial=>Muscle_Skeletal Type: asymmetric             |        |           |                      |                  |                   |                             |
| SourceGene: RP11-452F19.3(ENSG00000228106.1)                        |        |           |                      |                  |                   |                             |
| TargetGeneSet:                                                      | RPL22  | RP4       | SRGAP2P1             | SNX18P15         |                   | RPS27 FAM189B               |
| ACBD6                                                               | RP11   | UBC       | RPL31                | RPL37A           | RPL14             | CCDC72 FAM208A RPL24 RPL35A |
| RPL34                                                               | RPL37  | NNT       | BTF3                 | NSA2             | TBCA              | RPS23 CTD RELL2 HCP5        |
| CSNK2B                                                              | NOTCH4 | RPS18     | SYNGAP1              | RPL10A           | MRPS12            | RPS20 C8orf59 RPL30 THNSL1  |
| RPL27A                                                              | RPS13  | LPXN      | C11orf10             | FAU              | RPS25             | PFDN5 WIBG RPL41            |
| SLC24A6                                                             | TPT1   | MED4-AS1  | BIVM                 | RPL4             | TCEB2             | ZCCHC14 RPS7P1 SPAG5-AS1    |
| RPL23A                                                              | RPL27  | IER3IP1   | HMHA1                | MAP3K10          | SNRPD2            | RPS11 CPT1C EEF1B2P3        |
| TCEAL3                                                              |        |           |                      |                  |                   |                             |
| GOBPID                                                              | Pvalue | OddsRatio | ExpCount             | Count            | Size              | Term                        |
| GO:0006415                                                          | 24     | 91        | 2.06633390345245e-40 | 183.351812366738 |                   | 0.327451387447236           |
| translational termination                                           |        |           |                      |                  |                   |                             |
| GO:0000184                                                          | 25     | 119       | 2.12166164030355e-39 | 140.908195429472 |                   | 0.428205660507923           |
| nuclear-transcribed mRNA catabolic process, nonsense-mediated decay |        |           |                      |                  |                   |                             |
| GO:0006414                                                          | 24     | 105       | 1.01286699559936e-38 | 151.513227513228 |                   | 0.377828523977579           |
| translational elongation                                            |        |           |                      |                  |                   |                             |
| GO:0006614                                                          | 24     | 105       | 1.01286699559936e-38 | 151.513227513228 |                   | 0.377828523977579           |
| SRP-dependent cotranslational protein targeting to membrane         |        |           |                      |                  |                   |                             |
| GO:0006613                                                          | 24     | 106       | 1.30686375341027e-38 | 149.655052264808 |                   | 0.381426890872604           |
| cotranslational protein targeting to membrane                       |        |           |                      |                  |                   |                             |
| GO:0045047                                                          | 24     | 106       | 1.30686375341027e-38 | 149.655052264808 |                   | 0.381426890872604           |
| protein targeting to ER                                             |        |           |                      |                  |                   |                             |
| GO:0072599                                                          | 24     | 106       | 1.30686375341027e-38 | 149.655052264808 |                   | 0.381426890872604           |
| establishment of protein localization to endoplasmic reticulum      |        |           |                      |                  |                   |                             |
| GO:0070972                                                          | 24     | 118       | 2.28287588990214e-37 | 130.440729483283 |                   | 0.424607293612899           |
| protein localization to endoplasmic reticulum                       |        |           |                      |                  |                   |                             |
| GO:0019080                                                          | 151    |           | 1.42021310224845e-36 | 104.88683127572  | 0.543353401148709 | 25                          |
| viral genome expression                                             |        |           |                      |                  |                   |                             |
| GO:0019083                                                          | 151    |           | 1.42021310224845e-36 | 104.88683127572  | 0.543353401148709 | 25                          |
| viral transcription                                                 |        |           |                      |                  |                   |                             |
| GO:0000956                                                          | 25     | 169       | 2.90698812152579e-35 | 91.6602366255144 |                   | 0.608124005259152           |
| nuclear-transcribed mRNA catabolic process                          |        |           |                      |                  |                   |                             |
| GO:0006402                                                          | 25     | 178       | 1.15547026151555e-34 | 86.2139917695473 |                   | 0.640509307314373           |
| mRNA catabolic process                                              |        |           |                      |                  |                   |                             |
| GO:0006413                                                          | 24     | 152       | 1.69049505340889e-34 | 95.5647321428571 |                   | 0.546951768043734           |
| translational initiation                                            |        |           |                      |                  |                   |                             |
| GO:0006612                                                          | 24     | 153       | 2.0012394252553e-34  | 94.8172757475083 |                   | 0.550550134938759           |
| protein targeting to membrane                                       |        |           |                      |                  |                   |                             |
| GO:0043624                                                          | 24     | 153       | 2.0012394252553e-34  | 94.8172757475083 |                   | 0.550550134938759           |
| cellular protein complex disassembly                                |        |           |                      |                  |                   |                             |
| GO:0043241                                                          | 24     | 158       | 4.57092535173956e-34 | 91.2473347547974 |                   | 0.568541969413881           |
| protein complex disassembly                                         |        |           |                      |                  |                   |                             |
| GO:0006401                                                          | 25     | 205       | 4.78976746455963e-33 | 73.1430041152263 |                   | 0.737665213480036           |
| RNA catabolic process                                               |        |           |                      |                  |                   |                             |
| GO:0034623                                                          | 24     | 174       | 5.364037335902e-33   | 81.4228571428571 |                   | 0.626115839734274           |
| cellular macromolecular complex disassembly                         |        |           |                      |                  |                   |                             |



STable4\_20PerPair

|                                                                  |                                                              |                                                    |                   |      |
|------------------------------------------------------------------|--------------------------------------------------------------|----------------------------------------------------|-------------------|------|
| GO:0032984                                                       | 1.10112153428467e-32                                         | 78.76866359447                                     | 0.644107674209397 | 24   |
| 179                                                              | macromolecular complex disassembly                           |                                                    |                   |      |
| GO:0019058                                                       | 1.08040811381849e-31                                         | 63.794498381877                                    | 0.831222752750675 | 25   |
| 231                                                              | viral infectious cycle                                       |                                                    |                   |      |
| GO:0072594                                                       | 2.97522236261082e-31                                         | 67.7095238095238                                   | 0.734066846585011 |      |
| 24                                                               | 204                                                          | establishment of protein localization to organelle |                   |      |
| GO:0022415                                                       | 2.30178622896268e-30                                         | 55.8077226162333                                   | 0.935575392706387 |      |
| 25                                                               | 260                                                          | viral reproductive process                         |                   |      |
| GO:0071845                                                       | 1.08055864628249e-27                                         | 46.6120879120879                                   | 1.02193619818698  |      |
| 24                                                               | 284                                                          | cellular component disassembly at cellular level   |                   |      |
| GO:0022411                                                       | 1.52173021425648e-27                                         | 45.8928571428571                                   | 1.03632966576707  |      |
| 24                                                               | 288                                                          | cellular component disassembly                     |                   |      |
| GO:0016032                                                       | 2.58745487499351e-24                                         | 30.3708050773778                                   | 1.62286346965608  |      |
| 25                                                               | 451                                                          | viral reproduction                                 |                   |      |
| GO:0033365                                                       | 2.34727705743791e-22                                         | 26.63060769965                                     | 1.70202754134662  | 24   |
| 473                                                              | protein localization to organelle                            |                                                    |                   |      |
| GO:0006605                                                       | 2.46772339950581e-22                                         | 26.5695238095238                                   | 1.70562590824164  |      |
| 24                                                               | 474                                                          | protein targeting                                  |                   |      |
| GO:0022613                                                       | 1.49006029914864e-05                                         | 10.1189602446483                                   | 0.809632551380527 |      |
| 7                                                                | 225                                                          | ribonucleoprotein complex biogenesis               |                   |      |
| Tissue: Muscle_Skeletal=>Artery_Tibial                           | Type: asymmetric                                             |                                                    |                   |      |
| SourceGene:                                                      | RP11-56B16.2(ENSG00000259556.1)                              |                                                    |                   |      |
| TargetGeneSet:                                                   | KHDRBS1 CYP4A11 FPGT-TNNI3K PSMB4 C1orf61 RPL15 C3orf37 RP11 |                                                    |                   |      |
| EXOSC9 RXFP1 MRPS18B MRPL2 RSPH9 AGPAT4 TRGV5 EIF4H KRT8P3 PYCRL |                                                              |                                                    |                   |      |
| TMEM38B OPALIN SH3PXD2A ARL2 SF3B2 RPL18AP3 ARHGAP5-AS1 RPS2     |                                                              |                                                    |                   |      |
| MIR4519 LDHD SPIRE2 WNK4 NT5C HNRNPM CTD RPS5 PSMF1 MT1P3        |                                                              |                                                    |                   |      |
| U2AF1 XRCC6 RP13 RPS23P8                                         |                                                              |                                                    |                   |      |
| GOBPID                                                           | Pvalue OddsRatio ExpCount                                    | Count                                              | Size              | Term |
| Tissue: Artery_Tibial=>Muscle_Skeletal                           | Type: asymmetric                                             |                                                    |                   |      |

SourceGene: S100A6(ENSG00000197956.4) s100 calcium binding protein A6

|                |           |           |          |         |        |           |         |          |           |
|----------------|-----------|-----------|----------|---------|--------|-----------|---------|----------|-----------|
| TargetGeneSet: | WDC1      | CCDC23    | KDM4A    | INADL   | IL6R   | MTX1      | PRRC2C  | PPP2R5A  | PUM2      |
| UBC            | ORMDL1    | NIF3L1    | FAM117B  | PAX3    | D2HGDH | NR1D2     | OR7E94P | RP11     | CTD       |
| MAN2A1         | FAM53C    | FOXP4     | PEX6     | PHF3    | MDN1   | STXBP5    | ARID1B  | TNRC18   | C7orf41   |
| BAZ1B          | CUX1      | OPN1SW    | MLL3     | SEPT7P6 | RPS20  | C8orf59   | FAM91A1 | FAM83H   | MPDZ      |
| FAM13C         | LDB1      | HBE1      | OR52E8   | RPL27A  | RPS13  | PIGCP1    | UCP2    | MLL      | RPS25     |
| DSTNP2         | ITPR2     | RP3       | NR2C1    | ACAD10  | LRRC43 | PARP4-AS1 | RFXAP   | MED4-AS1 |           |
| HERC1          | TNFRSF12A |           | TXNDC11  | RPL7P47 | GDPD3  | SULT1A3   | FBXL19  | ANKFY1   | TOM1L2    |
| TMEM11         | RPS7P1    | RPL27     | FAM171A2 |         | TNRC6C | IER3IP1   | MAP3K10 | SNRPD2   | SYMPK BAX |
| RP1            | SLC16A8   | XPNPEP3   | WWC3     | MED12   | RPL39  | BCORL1    |         |          |           |
| GOBPID         | Pvalue    | OddsRatio | ExpCount | Count   | Size   | Term      |         |          |           |

STable4\_20PerPair

|                                                             |          |             |             |   |     |
|-------------------------------------------------------------|----------|-------------|-------------|---|-----|
| GO:0006415                                                  | 7.20E-08 | 23.38071895 | 0.36523424  | 7 | 91  |
| translational termination                                   |          |             |             |   |     |
| GO:0072594                                                  | 1.09E-07 | 13.3733124  | 0.818766867 | 9 | 204 |
| establishment of protein localization to organelle          |          |             |             |   |     |
| GO:0006414                                                  | 1.94E-07 | 20.0210084  | 0.421424123 | 7 | 105 |
| translational elongation                                    |          |             |             |   |     |
| GO:0006614                                                  | 1.94E-07 | 20.0210084  | 0.421424123 | 7 | 105 |
| SRP-dependent cotranslational protein targeting to membrane |          |             |             |   |     |
| GO:0006613                                                  | 2.07E-07 | 19.81738958 | 0.425437686 | 7 | 106 |
| cotranslational protein targeting to membrane               |          |             |             |   |     |
| GO:0045047                                                  | 2.07E-07 | 19.81738958 | 0.425437686 | 7 | 106 |
| protein targeting to ER                                     |          |             |             |   |     |

STable4\_20PerPair

|                                                                       |          |             |             |   |     |
|-----------------------------------------------------------------------|----------|-------------|-------------|---|-----|
| GO:0072599                                                            | 2.07E-07 | 19.81738958 | 0.425437686 | 7 | 106 |
| establishment of protein localization to endoplasmic reticulum        |          |             |             |   |     |
| GO:0070972                                                            | 4.31E-07 | 17.66013072 | 0.473600443 | 7 | 118 |
| protein localization to endoplasmic reticulum                         |          |             |             |   |     |
| GO:0034623                                                            | 4.32E-07 | 13.71277108 | 0.698359975 | 8 | 174 |
| cellular macromolecular complex disassembly                           |          |             |             |   |     |
| GO:0000184                                                            | 4.57E-07 | 17.50122549 | 0.477614006 | 7 | 119 |
| "nuclear-transcribed mRNA catabolic process, nonsense-mediated decay" |          |             |             |   |     |
| GO:0032984                                                            | 5.36E-07 | 13.3071345  | 0.71842779  | 8 | 179 |
| macromolecular complex disassembly                                    |          |             |             |   |     |
| GO:0071845                                                            | 1.77E-06 | 9.429461967 | 1.139851913 | 9 | 284 |
| cellular component disassembly at cellular level                      |          |             |             |   |     |
| GO:0022411                                                            | 1.98E-06 | 9.291639236 | 1.155906166 | 9 | 288 |
| cellular component disassembly                                        |          |             |             |   |     |

STable4\_20PerPair

|                                      |          |             |             |   |     |
|--------------------------------------|----------|-------------|-------------|---|-----|
| GO:0019080                           | 2.28E-06 | 13.58156318 | 0.606048024 | 7 | 151 |
| viral genome expression              |          |             |             |   |     |
| GO:0019083                           | 2.28E-06 | 13.58156318 | 0.606048024 | 7 | 151 |
| viral transcription                  |          |             |             |   |     |
| GO:0006413                           | 2.38E-06 | 13.48695064 | 0.610061587 | 7 | 152 |
| translational initiation             |          |             |             |   |     |
| GO:0006612                           | 2.49E-06 | 13.39363417 | 0.614075151 | 7 | 153 |
| protein targeting to membrane        |          |             |             |   |     |
| GO:0043624                           | 2.49E-06 | 13.39363417 | 0.614075151 | 7 | 153 |
| cellular protein complex disassembly |          |             |             |   |     |
| GO:0043241                           | 3.08E-06 | 12.94559148 | 0.634142966 | 7 | 158 |
| protein complex disassembly          |          |             |             |   |     |

STable4\_20PerPair

|                                            |          |             |             |   |     |      |
|--------------------------------------------|----------|-------------|-------------|---|-----|------|
| GO:0000956                                 | 4.81E-06 | 12.05725006 | 0.67829216  | 7 | 169 |      |
| nuclear-transcribed mRNA catabolic process |          |             |             |   |     |      |
| GO:0006402                                 | 6.77E-06 | 11.41543401 | 0.714414227 | 7 | 178 | mRNA |
| catabolic process                          |          |             |             |   |     |      |
| GO:0006401                                 | 1.70E-05 | 9.84006734  | 0.82278043  | 7 | 205 | RNA  |
| catabolic process                          |          |             |             |   |     |      |

Tissue: Muscle\_Skeletal=>Artery\_Tibial Type: asymmetric

SourceGene: TMED4(ENSG00000158604.9)

TargetGeneSet:

|             |            |         |         |          |             |              |          |          |           |      |
|-------------|------------|---------|---------|----------|-------------|--------------|----------|----------|-----------|------|
| FAM132A     | GNB1       | PANK4   | GPR157  | SLC25A34 | RP4         | FAM43B       |          |          |           |      |
| EIF4G3      | RP1        | SYF2    | DLGAP3  | STK40    | KCNQ4       | IP013        | SLC6A9   | ZFYVE9   | RP11      |      |
| FPGT-TNNI3K | LRRRC39    | SLC16A1 | GDAP2   | NOTCH2   | PMF1        | SMG5         | PEA15    | FAM78B   |           |      |
| TATDN3      | LIN9       | NUP133  | TOMM20  | LYST-IT1 | PXDND       | TRAPPC12-AS1 | KHK      | PREB     |           |      |
| EXOC6B      | SPR        | FAHD2A  | STARD7  | ACVR1    | BTF3L4P2    | FASTKD1      | UBE2V1   | NCKAP1   | KLF7      |      |
| INHA        | AGAP1      | MTMR14  | UBP1    | GOLGA4   | TRAK1       | PHF7         | PBRM1    | SPCS1    | TMEM110   |      |
| RPL10AP6    | PTPLB      | LRRRC34 | ABCC5   | VPS8     | TM4SF19-AS1 | TMEM128      | SHROOM3  |          |           |      |
| NUDT10      | EXOSC9     | SPATA5  | NAA15   | OTUD4    | WWC2        | CTD          | C7       | FBXO4    | RNF138P1  |      |
| PPIP5K2     | SEC24A     | SLU7    | ARL10   | C6orf228 | LST1        | AGER         | RPL10A   | SRPK1    |           |      |
| ASCC3       | BVES       | C6orf72 | MTRF1L  | PSMB1    | C7orf50     | TMEM196      | TMED4    | GTF2I    | GTF2IRD2B |      |
| TAF6        | FBXO24     | PMPCB   | COG5    | WDR91    | SLC4A2      | LMBR1        | ARHGEF10 | CHMP7    |           |      |
| SGK196      | CHD7       | C8orf46 | MYBL1   | FBXO43   | C8orf33     | SNAPC3       | ACO1     | DCTN3    | VPS13A    |      |
| BICD2       | FSD1L      | STXBP1  | AK8     | CAMSAP1  | C9orf69     | RNF224       | NOXA1    | PFKP     | FAM208B   | CDNF |
| FAM190B     | C10orf12   | MGEA5   | SFR1    | ACADSB   | PWWP2B      | CARS         | TRIM44   | PEX16    | DDB2      |      |
| PLCB3       | KDM2A      | PANX1   | FAM76B  | TIMM8B   | TTC12       | CCDC84       | DPAGT1   | ERC1     | C12orf33  |      |
| LRP6        | C12orf69   | LMO3    | KIF21A  | H1FNT    | LETMD1      | PRR13        | HOXC13   | HOXC5    |           |      |
| B4GALNT1    | XPOT       | RIC8B   | SSH1    | TAOK3    | MLEC        | ZNF605       | TPTE2    | SACS     | DGKH      |      |
| LINC00441   | DIAPH3-AS1 | OXAL1   | EAPP    | FANCM    | EXOC5       | CHURC1       | EXD2     |          |           |      |
| SRSF5       | GSTZ1      | PTPN21  | TTC7B   | MEG8     | TYRO3       | TP53BP1      | UBAP1L   | HEXA     | NEO1      |      |
| C15orf27    | ZNF592     | RHOT2   | ADCY9   | GLIS2    | CLEC16A     | NDE1         | KIF22    | TBX6     |           |      |
| GNAO1       | MMP15      | DDX19B  | GAN     | MPRIP    | ALKBH5      | LLGL1        | CCDC144C | C17orf51 |           |      |
| ANKRD13B    | CCT6B      | PGAP3   | SMARCE1 | DUSP3    | CDK5RAP3    | BPTF         | NT5C     |          |           |      |
| SOGA2       | GNAL       | WDR7    | APC2    | REEP6    | LMNB2       | PIP5K1C      | CATSPERD | CARM1    |           |      |
| SYCE2       | SAMD1      | U2AF1L4 | ALKBH6  | ZNF345   | SIPA1L3     | ZNF226       | EHD2     | CYTH2    | C19orf48  |      |
| NLRP9       | ZNF460     | ZNF552  | ZSCAN22 | ZNF446   | SNPH        | TASP1        | POLR3F   | RP3      | SLC35C2   |      |
| USP25       | CHAF1B     | MICAL3  | ZNF74   | CRKL     | MAPK1       | ZNF70        | GAS2L1   | PICK1    | CTA       |      |

Stable4\_20PerPair  
RANGAP1 C22orf32 TCF20 ZBED4 POLA1 RBM3 SUV39H1 RRAGB THOC2  
RBMX2 RBMX RP13  
GOBPID Pvalue OddsRatio ExpCount Count Size Term  
Tissue: Artery\_Tibial=>Muscle\_Skeletal Type: asymmetric

SourceGene: TMEM106C(ENSG00000134291.7) ?

TargetGeneSet: C1orf174 RPL22 H6PD CTNNBIP1 IPP CPT2 RP4  
GBP3 SLC35A3 RP11 S100A12 CHTOP POU2F1 JMJD4 IBA57 UBC POLE4 RPIA  
RPL31 ARL6IP6 BBS5 EEF1B2 D2HGDH CHCHD4 RPL29 PTPRG RPL24 RAB41 H1FX  
VPS8 RPL34 PHF17 RTN3P1 GARS RPS3A LPCAT1 LEAP2 ZFP2 CCDC90A  
TOB2P1 RPS18 MRPS12 IYD TATDN2P2 FBXL18 EEF1A1P6 LINC00265  
RPS3AP26 IFRD1 PPP2R2A ASPH SLC26A7 ZNF707 C9orf106 USP20  
NUP214 NKX2-1 RPL7A SEC16A VDAC2 ART1 CHRNA10 RNF141 NAALADL1  
ATG16L2 MMP8 TTC12 RPS25 TBCEL PFDN5 ARHGAP9 DDIT3 THAP2 TRAFD1 CDK8  
TPT1 C14orf21 SFTA3 DDX24 WDR25 RPS3AP47 TGM7 RPS3AP6  
NAGPA ITGAX CKLF DYNC1LI2 TMEM170A CMC2 MTHFSD RPS7P1 PIGS  
RPL23A RPL27 GNG8 COG1 CTD ADNP2 PRR22 EMR1 PEX11G C19orf59  
KLHL26 ZNF30 FXYD7 PRR19 VASP PYGB CDH4 RAC2 LDOC1L GPR64  
SUV39H1 PQBP1 RPL39  
GOBPID Pvalue OddsRatio ExpCount Count Size Term

GO:0006414 9.75E-16 31.37582418 0.610338385 14 105  
translational elongation

STable4\_20PerPair

|                                                                       |          |             |             |    |     |
|-----------------------------------------------------------------------|----------|-------------|-------------|----|-----|
| GO:0006415                                                            | 4.38E-15 | 33.54225352 | 0.528959934 | 13 | 91  |
| translational termination                                             |          |             |             |    |     |
| GO:0000184                                                            | 5.90E-15 | 27.16571429 | 0.691716836 | 14 | 119 |
| "nuclear-transcribed mRNA catabolic process, nonsense-mediated decay" |          |             |             |    |     |
| GO:0006614                                                            | 2.99E-14 | 28.41013472 | 0.610338385 | 13 | 105 |
| SRP-dependent cotranslational protein targeting to membrane           |          |             |             |    |     |
| GO:0006613                                                            | 3.40E-14 | 28.1026806  | 0.616151131 | 13 | 106 |
| cotranslational protein targeting to membrane                         |          |             |             |    |     |
| GO:0045047                                                            | 3.40E-14 | 28.1026806  | 0.616151131 | 13 | 106 |
| protein targeting to ER                                               |          |             |             |    |     |

STable4\_20PerPair

|                                                                |          |             |             |    |     |      |
|----------------------------------------------------------------|----------|-------------|-------------|----|-----|------|
| GO:0072599                                                     | 3.40E-14 | 28.1026806  | 0.616151131 | 13 | 106 |      |
| establishment of protein localization to endoplasmic reticulum |          |             |             |    |     |      |
| GO:0070972                                                     | 1.40E-13 | 24.87002012 | 0.68590409  | 13 | 118 |      |
| protein localization to endoplasmic reticulum                  |          |             |             |    |     |      |
| GO:0072594                                                     | 6.61E-13 | 16.30779848 | 1.185800291 | 15 | 204 |      |
| establishment of protein localization to organelle             |          |             |             |    |     |      |
| GO:0000956                                                     | 8.12E-13 | 18.33806452 | 0.982354162 | 14 | 169 |      |
| nuclear-transcribed mRNA catabolic process                     |          |             |             |    |     |      |
| GO:0006402                                                     | 1.66E-12 | 17.32073171 | 1.034668881 | 14 | 178 | mRNA |
| catabolic process                                              |          |             |             |    |     |      |



STable4\_20PerPair

|                                      |          |             |             |    |     |
|--------------------------------------|----------|-------------|-------------|----|-----|
| GO:0019080                           | 3.47E-12 | 18.87905695 | 0.877724725 | 13 | 151 |
| viral genome expression              |          |             |             |    |     |
| GO:0019083                           | 3.47E-12 | 18.87905695 | 0.877724725 | 13 | 151 |
| viral transcription                  |          |             |             |    |     |
| GO:0006413                           | 3.78E-12 | 18.74191914 | 0.883537471 | 13 | 152 |
| translational initiation             |          |             |             |    |     |
| GO:0006612                           | 4.11E-12 | 18.60674044 | 0.889350218 | 13 | 153 |
| protein targeting to membrane        |          |             |             |    |     |
| GO:0043624                           | 4.11E-12 | 18.60674044 | 0.889350218 | 13 | 153 |
| cellular protein complex disassembly |          |             |             |    |     |

STable4\_20PerPair

GO:0043241 6.21E-12 17.95881496 0.918413951 13 158  
 protein complex disassembly

GO:0006401 1.14E-11 14.84397906 1.191613037 14 205 RNA  
 catabolic process

GO:0034623 2.12E-11 16.15589187 1.011417895 13 174  
 cellular macromolecular complex disassembly

GO:0032984 3.04E-11 15.66375361 1.040481628 13 179  
 macromolecular complex disassembly

GO:0019058 7.29E-10 11.88377051 1.342744447 13 231  
 viral infectious cycle

STable4\_20PerPair

|                                                  |          |             |             |    |     |
|--------------------------------------------------|----------|-------------|-------------|----|-----|
| GO:0071845                                       | 8.63E-10 | 10.44222222 | 1.650820012 | 14 | 284 |
| cellular component disassembly at cellular level |          |             |             |    |     |

|                                |          |             |             |    |     |
|--------------------------------|----------|-------------|-------------|----|-----|
| GO:0022411                     | 1.03E-09 | 10.28686131 | 1.674070999 | 14 | 288 |
| cellular component disassembly |          |             |             |    |     |

|                            |          |            |             |    |     |
|----------------------------|----------|------------|-------------|----|-----|
| GO:0022415                 | 3.08E-09 | 10.4670126 | 1.511314096 | 13 | 260 |
| viral reproductive process |          |            |             |    |     |

|                                   |          |             |             |    |     |
|-----------------------------------|----------|-------------|-------------|----|-----|
| GO:0033365                        | 1.11E-08 | 7.161796885 | 2.749429105 | 16 | 473 |
| protein localization to organelle |          |             |             |    |     |

GO:0006605 1.14E-08 protein targeting 7.145646031 2.755241852 16 474

GO:0016032 2.93E-07 viral reproduction 6.375286041 2.621548682 14 451

Tissue: Muscle\_Skeletal=>Artery\_Tibial Type: asymmetric  
SourceGene: all\_source  
TargetGeneSet: MIR133A2 RPL36P4 MT1P2 APLP1 SLC7A11 CALCRL MAGI2  
PMP22 ELOVL3 RBM38 TPH1 SNAI1 C6orf25 C10orf99 PRMT8 GK5  
FHDC1 CTB HSD11B2 MAP3K1 DGCR2 OXSM LINC00452 CCL21 ITIH4-AS1  
ICOS DUTP7 ZBTB34 LRRC6 APAF1 TSPYL6 LSR B3GALT C10orf32  
TRIB1 NHSL1 LCE2A PQBP1 RPS12P26 ART1 C1orf229 CD247 CSF3  
GALNT14 EEF1A1P12 NUAK1 PBK TELO2 ATP6V1A NF2 RP13 HBEGF  
FAM174A WDR25 TBC1D2B RP1 DOPEY1 MPO CLVS2 SORBS1 ZC3HC1 RNF122  
SAM15 PROM1 TM4SF1 TMED4 PRICKLE2 PHEX-AS1 WISP3 FAM46A  
MCRS1 USP20 RNF141 MAPK13 MAFK HOMEZ PLCXD2 GPRC5C C1orf174 KLF4  
PIGL BUD13 NFE2L3 NACA2 GABRB2 NPPB EEPD1 U6 LSM14B MTERFD2 CINP  
IGHV3-74 ZSWIM3 RASD1 NPFF RBAK C15orf57 PPP1R10 C15orf23  
MYO18B ADAM33 PDZK1IP1-AS1 PITX3 PITX2 KLLN FAM173A DNAJC12 GIT1  
HIBADH PDF MTHFD1P1 FAM181A-AS1 ABCA9 RALGAPA2 DNAH11 FOS  
VEZF1P1 LYL1 SNORA7A SRGAP2-IT1 CDH4 PCBP2P1 RALGPS1 PDK1 NOG  
ARPC3P1 MTRNR2L1 USP54 GPR124 C2CD2 GAPDHP44 CHAD MMP28  
SLC35A3 C8orf42 BACE2 DNM1P33 CTD JAKMIP1 UBOX5 SVIP HIPK4 C1orf9  
CCDC57 SH2B1 RP4 U1 TRAF3IP1 MYSM1 C6orf162 ARFGAP3  
AP5Z1 SOCS1 AVIL CHRNA10 PABPC3 C16orf45 PDCD6 FAM53C MTA2  
TRAPPC9 C15orf44 CYB5R1 IQSEC2 ADPRHL1 POLH JMJD4 SULT1A3 MRPS2  
PAFAH1B2 IRF2BPL POLR2B TTLL7-IT1 AIF1L APOBEC2 CACNG1 PCP2  
MTHFSD RP11 SYT12 TMEM140 TMEM171 HCG20 CEBPE NR1I3 PTGDR2 COX7A2P1  
RNASEH1 IL13 SLC22A13 ZNF678 EBF2 GAPDHP62 VGLL4 LIPJ  
EIF4A1P7 HNRNPH2 PITPNM3 FAM181A KLHL26 TAF1C GLTPD1 TEAD3 ZNF689 PBX1  
C3orf37 SPHK2 WIPI2 TYMP IFNG TNFAIP8L1 PHLDA1 ZNF329 TCEB1P2 IL6R  
PEX10 PUF60 EBF1 BMP4 E2F3 BMP5 TMEM50B HMOX1 DFFB FTLP3  
MTND4P24 MT

| GOBPID     | Pvalue | OddsRatio                                               | ExpCount         | Count            | Size | Term              |
|------------|--------|---------------------------------------------------------|------------------|------------------|------|-------------------|
| GO:0048660 | 64     | 2.77023798858757e-08                                    | 15.7433660933661 |                  |      | 0.695315203100132 |
| 9          | 64     | regulation of smooth muscle cell proliferation          |                  |                  |      |                   |
| GO:0048659 | 67     | 4.18321374063363e-08                                    | 14.925908667288  | 0.72790810324545 |      | 9                 |
| 67         | 67     | smooth muscle cell proliferation                        |                  |                  |      |                   |
| GO:0033002 | 10     | 7.86852492477653e-08                                    | 11.3717486994798 |                  |      | 1.03210850460176  |
| 10         | 95     | muscle cell proliferation                               |                  |                  |      |                   |
| GO:0048661 | 6      | 3.62512358780466e-06                                    | 17.1715833835039 |                  |      | 0.423707701889143 |
| 6          | 39     | positive regulation of smooth muscle cell proliferation |                  |                  |      |                   |

Stable4\_20PerPair

| Tissue:        | Artery_Tibial=>Nerve_Tibial | Type:     | asymmetric           |                  |                   |                                                                     |         |          |           |      |
|----------------|-----------------------------|-----------|----------------------|------------------|-------------------|---------------------------------------------------------------------|---------|----------|-----------|------|
| SourceGene:    | C10orf35(ENSG00000171224.7) |           |                      |                  |                   |                                                                     |         |          |           |      |
| TargetGeneSet: | RPL22                       | ZMYND12   | PPCS                 | LRRC41           | ATPAF1            | BTF3L4                                                              | RP11    | RPL5     | RP4       |      |
| ATP5F1         | RPS27                       | CAMSAP2   | KLHL12               | SNRPE            | SOX13             | PLXNA2                                                              | BROX    | ARV1     | CNST      |      |
| PPM1B          | MTHFD2                      | COA5      | UNC50                | CCDC115          | NIF3L1            | RPL37A                                                              | SETD5   | RPL15    | KIF9      |      |
| TRAIP          | RPL29                       | SPCS1     | RNF7                 | MBNL1            | RSRC1             | FNDC3B                                                              | METTL19 | C4orf52  | THAP6     |      |
| COPS4          | MRPS18C                     | RPL34     | KIAA0922             |                  | TAF9              | BTF3                                                                | XRCC4   | HINT1    | AFF4      | SKP1 |
| SH3PXD2B       |                             | NOL7      | MRPS18B              | RPL10A           | GAPDHP15          |                                                                     | RPL39P3 | MRPS12   | RP1       |      |
| ARID1B         | TMEM181                     | BUD31     | FAM200A              | FBXO24           | KAT6A             | C8orf40                                                             | C8orf22 | XKR4     | RPS20     |      |
| RPL30          | POLR2K                      | ZHX1      | C9orf123             |                  | DCTN3             | RPL12                                                               | MRPL41  | COX15    | SFR1      |      |
| RPS13          | EIF3M                       | DDB2      | POLR2G               | FCHSD2           | C11orf1           | ATP5L                                                               | RPS25   | C12orf57 |           |      |
| C12orf47       |                             | ELF1      | COMMD6               | STK24            | LTB4R             | KTN1                                                                | ISCA2   | PSMC1    | C14orf142 |      |
| RPL3P4         | DTWD1                       | CARHSP1   | CTA                  | LCMT1            | NAE1              | DERL2                                                               | RPL26   | MAPK7    | RPL17     |      |
| RPL38          | DUS1L                       | FOXK2     | CTD                  | RPL36            | BRD4              | JPH2                                                                | ATP5J   | CSDC2    | C22orf40  |      |
| RPS2P55        | ATRX                        |           |                      |                  |                   |                                                                     |         |          |           |      |
| GOBPID         | Pvalue                      | OddsRatio | ExpCount             | Count            | Size              | Term                                                                |         |          |           |      |
| GO:0006614     | 18                          | 105       | 1.38481720267066e-21 | 41.5978630403108 |                   | SRP-dependent cotranslational protein targeting to membrane         |         |          |           |      |
| GO:0006613     | 18                          | 106       | 1.6602657582738e-21  | 41.1222791293214 |                   | cotranslational protein targeting to membrane                       |         |          |           |      |
| GO:0045047     | 18                          | 106       | 1.6602657582738e-21  | 41.1222791293214 |                   | protein targeting to ER                                             |         |          |           |      |
| GO:0072599     | 18                          | 106       | 1.6602657582738e-21  | 41.1222791293214 |                   | establishment of protein localization to endoplasmic reticulum      |         |          |           |      |
| GO:0006415     | 17                          | 91        | 4.21536756381393e-21 | 45.5885885885886 |                   | translational termination                                           |         |          |           |      |
| GO:0070972     | 18                          | 118       | 1.27463902762592e-20 | 36.1571830985916 |                   | protein localization to endoplasmic reticulum                       |         |          |           |      |
| GO:0019080     | 19                          | 151       | 4.3944017071538e-20  | 29.2608225108225 |                   | viral genome expression                                             |         |          |           |      |
| GO:0019083     | 19                          | 151       | 4.3944017071538e-20  | 29.2608225108225 |                   | viral transcription                                                 |         |          |           |      |
| GO:0006414     | 17                          | 105       | 5.62679419065913e-20 | 38.2982954545455 |                   | translational elongation                                            |         |          |           |      |
| GO:0000184     | 17                          | 119       | 5.23620634255959e-19 | 33.0092592592593 |                   | nuclear-transcribed mRNA catabolic process, nonsense-mediated decay |         |          |           |      |
| GO:0006413     | 18                          | 152       | 1.42411153623148e-18 | 26.9186462055918 |                   | translational initiation                                            |         |          |           |      |
| GO:0006612     | 18                          | 153       | 1.60641818017974e-18 | 26.7173708920188 |                   | protein targeting to membrane                                       |         |          |           |      |
| GO:0019058     | 20                          | 231       | 7.75988172814626e-18 | 19.4395219451885 |                   | viral infectious cycle                                              |         |          |           |      |
| GO:0043624     | 17                          | 153       | 4.213261542162e-17   | 24.6979166666667 |                   | cellular protein complex disassembly                                |         |          |           |      |
| GO:0043241     | 158                         |           | 7.32595854230213e-17 | 23.813731284476  | 0.973081447650682 | protein complex disassembly                                         | 17      |          |           |      |
| GO:0022415     | 20                          | 260       | 7.96107871597996e-17 | 17.0555555555556 |                   | viral reproductive process                                          |         |          |           |      |
| GO:0000956     | 17                          | 169       | 2.31817905642901e-16 | 22.0732821637427 |                   | nuclear-transcribed mRNA catabolic process                          |         |          |           |      |
| GO:0072594     | 204                         |           | 2.92975829806545e-16 | 19.3221263062244 |                   | establishment of protein localization to organelle                  | 18      |          |           |      |
| GO:0034623     | 17                          | 174       | 3.80902046211827e-16 | 21.3627919320594 |                   | cellular macromolecular complex disassembly                         |         |          |           |      |
| GO:0006402     | 17                          | 178       | 5.60386723225121e-16 | 20.8261732229124 |                   | mRNA catabolic process                                              |         |          |           |      |
| GO:0032984     | 179                         |           | 6.16251868877569e-16 | 20.696159122085  | 1.10241505778147  | macromolecular complex disassembly                                  | 17      |          |           |      |
| GO:0016032     | 23                          | 451       | 2.34714639752683e-15 | 11.3452987822147 |                   | viral reproduction                                                  |         |          |           |      |
| GO:0006401     | 17                          | 205       | 6.04928694818813e-15 | 17.8012706855792 |                   | RNA catabolic process                                               |         |          |           |      |
| GO:0071845     |                             |           | 6.78592096436273e-15 | 14.4389757412399 |                   |                                                                     | 19      |          |           |      |

Stable4\_20PerPair

|                                     |                                                  |                                                                     |                  |                   |                  |                   |         |           |        |
|-------------------------------------|--------------------------------------------------|---------------------------------------------------------------------|------------------|-------------------|------------------|-------------------|---------|-----------|--------|
| 284                                 | cellular component disassembly at cellular level |                                                                     |                  |                   |                  |                   |         |           |        |
| GO:0022411                          |                                                  | 8.76344183537776e-15                                                | 14.220233669676  | 1.77371808179365  |                  |                   |         |           | 19     |
| 288                                 | cellular component disassembly                   |                                                                     |                  |                   |                  |                   |         |           |        |
| GO:0033365                          |                                                  | 5.79041800110511e-11                                                | 8.31504090623033 |                   | 2.91308559961248 |                   |         |           |        |
| 19                                  | 473                                              | protein localization to organelle                                   |                  |                   |                  |                   |         |           |        |
| GO:0006605                          |                                                  | 6.00373783552746e-11                                                | 8.29616954474097 |                   | 2.91924434295204 |                   |         |           |        |
| 19                                  | 474                                              | protein targeting                                                   |                  |                   |                  |                   |         |           |        |
| Tissue: Nerve_Tibial=>Artery_Tibial |                                                  |                                                                     | Type: asymmetric |                   |                  |                   |         |           |        |
| SourceGene:                         |                                                  | CROCCP3(ENSG00000080947.9)                                          |                  |                   |                  |                   |         |           |        |
| TargetGeneSet:                      | RP13                                             | RP11                                                                | KHDRBS1          | IPP               | BEND5            | LYPLAL1           | TOMM20  | ABHD1     |        |
| DDIT3                               | EIF3FP3                                          | FAHD2B                                                              | MCM6             | FMNL2             | PPIG             | LRRN4             | RPL15   | SPCS1     | CPOX   |
| RPL24                               | NDUFB4                                           | ITGB5-AS1                                                           |                  | DHX36             | ATP5G1P4         |                   | ABCC5   | WDFY3-AS1 |        |
| OTUD4                               | EPB41L4A-AS1                                     | CCT5P1                                                              | CTB              | RPL26L1           | ARL10            | TBC1D9B           | RPS10   | RPL10A    |        |
| C6orf226                            |                                                  | MRPL2                                                               | RP1              | DDO               | SOGA3            | SPDYE1            | RP4     | RHBDD2    | STAG3  |
| HMBX1                               | C8orf40                                          | PRKDC                                                               | RPS20            | CHCHD7            | SNHG6            | TATDN1            | EEF1D   | TONSL     | RPL8   |
| RPL35                               | RPL12                                            | NOXA1                                                               | CDNF             | ZNF37BP           | DDIT4            | CTD               | EIF3F   | RPL27A    | NDUFV1 |
| ZCRB1                               | TIMELESS                                         |                                                                     | NACA             | YEATS4            | ISCU             | C12orf51          |         | SMAD9-AS1 | PHB2   |
| C13orf44-IT1                        | DHRS12                                           | SYNE2                                                               | CEP152           | GS1               | SMG1             | GTF3C1            | NUDT21  | DDX19B    |        |
| COX4I1                              | RPL13                                            | C17orf108                                                           | ACACA            | RPL19             | CCR10            | ZADH2             | RPL36   | PRR24     |        |
| RPL18                               | ZNF341                                           | MT1P3                                                               | SCAND1           | SLC2A4RG          | USP16            | URB1              | CHCHD10 | CTA       |        |
| PLCXD1                              | RP3                                              | FAM122C                                                             | RPL10            |                   |                  |                   |         |           |        |
| GOBPID                              | Pvalue                                           | OddsRatio                                                           | ExpCount         | Count             | Size             | Term              |         |           |        |
| GO:0006414                          |                                                  | 6.90619840747159e-20                                                | 45.0668243642815 |                   |                  | 0.530413120199294 |         |           |        |
| 16                                  | 105                                              | translational elongation                                            |                  |                   |                  |                   |         |           |        |
| GO:0006614                          |                                                  | 6.90619840747159e-20                                                | 45.0668243642815 |                   |                  | 0.530413120199294 |         |           |        |
| 16                                  | 105                                              | SRP-dependent cotranslational protein targeting to membrane         |                  |                   |                  |                   |         |           |        |
| GO:0006613                          |                                                  | 8.10359646248825e-20                                                | 44.562962962963  | 0.535464673725002 |                  |                   |         |           | 16     |
| 106                                 |                                                  | cotranslational protein targeting to membrane                       |                  |                   |                  |                   |         |           |        |
| GO:0045047                          |                                                  | 8.10359646248825e-20                                                | 44.562962962963  | 0.535464673725002 |                  |                   |         |           | 16     |
| 106                                 |                                                  | protein targeting to ER                                             |                  |                   |                  |                   |         |           |        |
| GO:0072599                          |                                                  | 8.10359646248825e-20                                                | 44.562962962963  | 0.535464673725002 |                  |                   |         |           | 16     |
| 106                                 |                                                  | establishment of protein localization to endoplasmic reticulum      |                  |                   |                  |                   |         |           |        |
| GO:0006415                          |                                                  | 3.14843541559965e-19                                                | 48.6683303085299 |                   |                  | 0.459691370839388 |         |           |        |
| 15                                  | 91                                               | translational termination                                           |                  |                   |                  |                   |         |           |        |
| GO:0070972                          |                                                  | 4.89284304868317e-19                                                | 39.2872377020984 |                   |                  | 0.596083316033493 |         |           |        |
| 16                                  | 118                                              | protein localization to endoplasmic reticulum                       |                  |                   |                  |                   |         |           |        |
| GO:0000184                          |                                                  | 5.63177529675806e-19                                                | 38.9030829500937 |                   |                  | 0.6011348695592   |         |           | 16     |
| 119                                 |                                                  | nuclear-transcribed mRNA catabolic process, nonsense-mediated decay |                  |                   |                  |                   |         |           |        |
| GO:0006413                          |                                                  | 3.16844260983172e-17                                                | 29.3952528379773 |                   |                  | 0.76783613590755  |         |           |        |
| 16                                  | 152                                              | translational initiation                                            |                  |                   |                  |                   |         |           |        |
| GO:0006612                          |                                                  | 3.52523541807684e-17                                                | 29.1786400307338 |                   |                  | 0.772887689433257 |         |           |        |
| 16                                  | 153                                              | protein targeting to membrane                                       |                  |                   |                  |                   |         |           |        |
| GO:0043241                          |                                                  | 5.94358273078551e-17                                                | 28.1413392636521 |                   |                  | 0.798145457061795 |         |           |        |
| 16                                  | 158                                              | protein complex disassembly                                         |                  |                   |                  |                   |         |           |        |
| GO:0072594                          |                                                  | 1.583500418993e-16                                                  | 23.0373376623377 |                   |                  | 1.03051691924434  |         |           |        |
| 17                                  | 204                                              | establishment of protein localization to organelle                  |                  |                   |                  |                   |         |           |        |
| GO:0000956                          |                                                  | 1.76493880694697e-16                                                | 26.0979245499369 |                   |                  | 0.853712545844578 |         |           |        |
| 16                                  | 169                                              | nuclear-transcribed mRNA catabolic process                          |                  |                   |                  |                   |         |           |        |
| GO:0006402                          |                                                  | 4.06609441071111e-16                                                | 24.6324453108079 |                   |                  | 0.899176527575946 |         |           |        |
| 16                                  | 178                                              | mRNA catabolic process                                              |                  |                   |                  |                   |         |           |        |
| GO:0032984                          |                                                  | 4.44848468912443e-16                                                | 24.4796039177699 |                   |                  | 0.904228081101654 |         |           |        |
| 16                                  | 179                                              | macromolecular complex disassembly                                  |                  |                   |                  |                   |         |           |        |
| GO:0019080                          |                                                  | 8.244973911826e-16                                                  | 27.0829107505071 |                   |                  | 0.762784582381842 |         |           |        |
| 15                                  | 151                                              | viral genome expression                                             |                  |                   |                  |                   |         |           |        |
| GO:0019083                          |                                                  | 8.244973911826e-16                                                  | 27.0829107505071 |                   |                  | 0.762784582381842 |         |           |        |
| 15                                  | 151                                              | viral transcription                                                 |                  |                   |                  |                   |         |           |        |
| GO:0043624                          |                                                  | 1.00652448871285e-15                                                | 26.6866566716642 |                   |                  | 0.772887689433257 |         |           |        |
| 15                                  | 153                                              | cellular protein complex disassembly                                |                  |                   |                  |                   |         |           |        |
| GO:0006401                          |                                                  | 3.86587428900499e-15                                                | 21.0734243014945 |                   |                  | 1.03556847277005  |         |           |        |
| 16                                  | 205                                              | RNA catabolic process                                               |                  |                   |                  |                   |         |           |        |
| GO:0034623                          |                                                  | 6.98680755445834e-15                                                | 23.1278464541314 |                   |                  | 0.878970313473116 |         |           |        |
| 15                                  | 174                                              | cellular macromolecular complex disassembly                         |                  |                   |                  |                   |         |           |        |
| GO:0019058                          |                                                  | 4.61240226551949e-13                                                | 16.9564176245211 |                   |                  | 1.16690886443845  |         |           |        |

Stable4\_20PerPair

|                                     |          |                                                                     |                  |        |        |                   |         |                  |        |
|-------------------------------------|----------|---------------------------------------------------------------------|------------------|--------|--------|-------------------|---------|------------------|--------|
| 15                                  | 231      | viral infectious cycle                                              |                  |        |        |                   |         |                  |        |
| GO:0022411                          |          | 7.76646211009645e-13                                                | 14.5572755417957 |        |        |                   |         | 1.45484741540378 |        |
| 16                                  | 288      | cellular component disassembly                                      |                  |        |        |                   |         |                  |        |
| GO:0022415                          |          | 2.56567103853682e-12                                                | 14.9187192118227 |        |        |                   |         | 1.31340391668397 |        |
| 15                                  | 260      | viral reproductive process                                          |                  |        |        |                   |         |                  |        |
| GO:0071845                          |          | 9.11819223887337e-12                                                | 13.5646071016536 |        |        |                   |         | 1.43464120130095 |        |
| 15                                  | 284      | cellular component disassembly at cellular level                    |                  |        |        |                   |         |                  |        |
| GO:0033365                          |          | 1.40679287257283e-11                                                | 10.0145454545455 |        |        |                   |         | 2.38938481765968 |        |
| 18                                  | 473      | protein localization to organelle                                   |                  |        |        |                   |         |                  |        |
| GO:0006605                          |          | 1.4569105049423e-11                                                 | 9.99186602870813 |        |        |                   |         | 2.39443637118538 |        |
| 18                                  | 474      | protein targeting                                                   |                  |        |        |                   |         |                  |        |
| GO:0016032                          |          | 6.3932193816875e-10                                                 | 8.99729784230692 |        |        |                   |         | 2.27825064009411 |        |
| 16                                  | 451      | viral reproduction                                                  |                  |        |        |                   |         |                  |        |
| Tissue: Nerve_Tibial=>Artery_Tibial |          |                                                                     | Type: asymmetric |        |        |                   |         |                  |        |
| SourceGene:                         |          | CTA-520D8.2(ENSG00000237445.1)                                      |                  |        |        |                   |         |                  |        |
| TargetGeneSet:                      |          | RP11                                                                | ARNT             | EEF1B2 | GPR55  | TMEM43            | RPL29   | RPL24            | GPRIN3 |
| ITGA1                               | CTB      | RPS10                                                               | RPL7             | EIF3H  | EEF1D  | NAA35             | EDF1    | PIK3AP1          | RPS3   |
| BUD13                               | RPL18AP3 |                                                                     | RPL6             | RPL13  | RPL23A | RPL17             | RPL19   | RPL18A           | RPS16  |
| RPL18                               | CD33     | UBE2M                                                               | CHMP4B           | RALY   | RPS21  | SH3KBP1           | NUP62CL |                  |        |
| GOBPID                              | Pvalue   | OddsRatio                                                           | ExpCount         | Count  | Size   | Term              |         |                  |        |
| GO:0006414                          |          | 5.02934023179459e-27                                                | 171.757303370787 |        |        | 0.225243927755865 |         |                  |        |
| 16                                  | 105      | translational elongation                                            |                  |        |        |                   |         |                  |        |
| GO:0006415                          |          | 1.31799727206099e-23                                                | 153.401069518717 |        |        | 0.195211404055083 |         |                  |        |
| 14                                  | 91       | translational termination                                           |                  |        |        |                   |         |                  |        |
| GO:0006614                          |          | 1.11465811618562e-22                                                | 129.674208144796 |        |        | 0.225243927755865 |         |                  |        |
| 14                                  | 105      | SRP-dependent cotranslational protein targeting to membrane         |                  |        |        |                   |         |                  |        |
| GO:0006613                          |          | 1.28286079883624e-22                                                | 128.255754475703 |        |        | 0.227389108020206 |         |                  |        |
| 14                                  | 106      | cotranslational protein targeting to membrane                       |                  |        |        |                   |         |                  |        |
| GO:0045047                          |          | 1.28286079883624e-22                                                | 128.255754475703 |        |        | 0.227389108020206 |         |                  |        |
| 14                                  | 106      | protein targeting to ER                                             |                  |        |        |                   |         |                  |        |
| GO:0072599                          |          | 1.28286079883624e-22                                                | 128.255754475703 |        |        | 0.227389108020206 |         |                  |        |
| 14                                  | 106      | establishment of protein localization to endoplasmic reticulum      |                  |        |        |                   |         |                  |        |
| GO:0006413                          |          | 2.74222482694532e-22                                                | 97.7395072992701 |        |        | 0.326067400179918 |         |                  |        |
| 15                                  | 152      | translational initiation                                            |                  |        |        |                   |         |                  |        |
| GO:0070972                          |          | 6.24825863287656e-22                                                | 113.361990950226 |        |        | 0.253131271192305 |         |                  |        |
| 14                                  | 118      | protein localization to endoplasmic reticulum                       |                  |        |        |                   |         |                  |        |
| GO:0000184                          |          | 7.07352833397243e-22                                                | 112.274509803922 |        |        | 0.255276451456647 |         |                  |        |
| 14                                  | 119      | nuclear-transcribed mRNA catabolic process, nonsense-mediated decay |                  |        |        |                   |         |                  |        |
| GO:0019080                          |          | 2.27927918353134e-20                                                | 85.8574495491627 |        |        | 0.323922219915577 |         |                  |        |
| 14                                  | 151      | viral genome expression                                             |                  |        |        |                   |         |                  |        |
| GO:0019083                          |          | 2.27927918353134e-20                                                | 85.8574495491627 |        |        | 0.323922219915577 |         |                  |        |
| 14                                  | 151      | viral transcription                                                 |                  |        |        |                   |         |                  |        |
| GO:0006612                          |          | 2.75724644608103e-20                                                | 84.6102412187897 |        |        | 0.32821258044426  |         |                  |        |
| 14                                  | 153      | protein targeting to membrane                                       |                  |        |        |                   |         |                  |        |
| GO:0043624                          |          | 2.75724644608103e-20                                                | 84.6102412187897 |        |        | 0.32821258044426  |         |                  |        |
| 14                                  | 153      | cellular protein complex disassembly                                |                  |        |        |                   |         |                  |        |
| GO:0043241                          |          | 4.3880052088887e-20                                                 | 81.6437908496732 |        |        | 0.338938481765968 |         |                  |        |
| 14                                  | 158      | protein complex disassembly                                         |                  |        |        |                   |         |                  |        |
| GO:0000956                          |          | 1.15722733570687e-19                                                | 75.7912713472486 |        |        | 0.362535464673725 |         |                  |        |
| 14                                  | 169      | nuclear-transcribed mRNA catabolic process                          |                  |        |        |                   |         |                  |        |
| GO:0034623                          |          | 1.75945658274205e-19                                                | 73.3970588235294 |        |        | 0.373261365995433 |         |                  |        |
| 14                                  | 174      | cellular macromolecular complex disassembly                         |                  |        |        |                   |         |                  |        |
| GO:0006402                          |          | 2.43793015979867e-19                                                | 71.5868005738881 |        |        | 0.381842087052799 |         |                  |        |
| 14                                  | 178      | mRNA catabolic process                                              |                  |        |        |                   |         |                  |        |
| GO:0032984                          |          | 2.6418492968021e-19                                                 | 71.1479500891266 |        |        | 0.383987267317141 |         |                  |        |
| 14                                  | 179      | macromolecular complex disassembly                                  |                  |        |        |                   |         |                  |        |
| GO:0072594                          |          | 1.71051515428738e-18                                                | 61.6780185758514 |        |        | 0.43761677392568  |         |                  |        |
| 14                                  | 204      | establishment of protein localization to organelle                  |                  |        |        |                   |         |                  |        |
| GO:0006401                          |          | 1.83385229797468e-18                                                | 61.3507853403141 |        |        | 0.439761954190021 |         |                  |        |
| 14                                  | 205      | RNA catabolic process                                               |                  |        |        |                   |         |                  |        |
| GO:0019058                          |          | 9.98733941194616e-18                                                | 53.9013282732448 |        |        | 0.495536641062902 |         |                  |        |
| 14                                  | 231      | viral infectious cycle                                              |                  |        |        |                   |         |                  |        |
| GO:0022415                          |          | 5.30005349293814e-17                                                | 47.4500239120038 |        |        | 0.557746868728808 |         |                  |        |

Stable4\_20PerPair

|                |                             |                                                                |                  |                   |          |                   |          |          |          |
|----------------|-----------------------------|----------------------------------------------------------------|------------------|-------------------|----------|-------------------|----------|----------|----------|
| 14             | 260                         | viral reproductive process                                     |                  |                   |          |                   |          |          |          |
| GO:0071845     |                             | 1.83128841043921e-16                                           | 43.1590413943355 |                   |          | 0.609231195073005 |          |          |          |
| 14             | 284                         | cellular component disassembly at cellular level               |                  |                   |          |                   |          |          |          |
| GO:0022411     |                             | 2.22765937577193e-16                                           | 42.516960068699  | 0.617811916130372 |          |                   |          | 14       |          |
| 288            |                             | cellular component disassembly                                 |                  |                   |          |                   |          |          |          |
| GO:0016032     |                             | 1.11223409867631e-13                                           | 26.3510566698075 |                   |          | 0.967476299218047 |          |          |          |
| 14             | 451                         | viral reproduction                                             |                  |                   |          |                   |          |          |          |
| GO:0033365     |                             | 2.13374419548453e-13                                           | 25.0485710624119 |                   |          | 1.01467026503356  |          |          |          |
| 14             | 473                         | protein localization to organelle                              |                  |                   |          |                   |          |          |          |
| GO:0006605     |                             | 2.19619968406647e-13                                           | 24.9923273657289 |                   |          | 1.0168154452979   |          | 14       |          |
| 474            |                             | protein targeting                                              |                  |                   |          |                   |          |          |          |
| Tissue:        | Artery_Tibial=>Nerve_Tibial | Type:                                                          | asymmetric       |                   |          |                   |          |          |          |
| SourceGene:    | DCTN3(ENSG00000137100.10)   |                                                                |                  |                   |          |                   |          |          |          |
| TargetGeneSet: | RP11                        | RPL22                                                          | ZBTB17           | KPNA7             | EIF3I    | RP4               | MAP7D1   | UQCRH    |          |
| DIRAS3         | PIGK                        | COL24A1                                                        | ATP5F1           | ANKRD35           | APH1A    | MRPS21            | SMG5     | MNDA     | TSTD1    |
| TMC01          | DENND1B                     | CAMSAP2                                                        | SNRPE            | TMEM81            | IKBKE    | BROX              | LYST-IT1 |          | ZNF692   |
| YWHAQ          | TTC32                       | SLC5A6                                                         | RPLP0P6          | DHX57             | MORN2    | NFU1              | TPRKB    | CAPG     | GGCX     |
| RPL31          | SMPD4                       | CCDC115                                                        | FMNL2            | SPC25             | SCRN3    | CHRNA1            | HOXD-AS2 |          | RBM45    |
| KCTD18         | NDUFB3                      | IMPDH1P10                                                      | LANCL1           | GPR55             | OR6B3    | SETD5             | ZNF197   | PTPN23   | RBM6     |
| VPRBP          | SPCS1                       | ARL6IP5                                                        | GXYLT2           | CLDN18            | ARID4A   | MRPL47            | NDUFB5   | EIF4G1   | KIAA0226 |
| RPL35A         | MYL5                        | NOP14                                                          | TLR1             | UTP3              | MRPS18C  | RPL34             | PLK4     | MGST2    | OTUD4    |
| XRCC4          | CTD                         | UQCRQ                                                          | UBE2D2           | CTB               | TCOF1    | CD74              | RPS14    | ARL10    | TMEM14C  |
| TMEM14B        | PRSS16                      | PPP1R10                                                        | LST1             | C6orf48           | HLA-DMB  | HLA-DMA           | RPS10    | HNRNPC   | RP3      |
| KIAA0240       |                             | C6orf226                                                       |                  | MAD2L1BP          |          | VEGFA             | RPL39P3  | COX7A2   | ASF1A    |
| SLC18B1        | MRPS12                      | ARID1B                                                         | C6orf70          | SNX8              | NDUFA4   | LSM5              | SEC61G   | GS1      | ACN9     |
| NDUFA5         | KAT6A                       | MRPL15                                                         | RPS20            | PENK              | C8orf59  | FAM82B            | TP53INP1 |          | UQCRB    |
| COX6C          | POLR2K                      | KIAA0196                                                       |                  | RP13              | FAM83H   | C9orf123          |          | DCTN3    | GBA2     |
| LINC00475      |                             | SEC61B                                                         | STXBP1           | ODF2              | ZDHHC12  | C9orf114          |          | FAM78A   | FAM208B  |
| FBXO18         | ATP5C1                      | COMMD3                                                         | PARD3            | TMEM26            | PBLD     | IFIT2             | RPP30    | RPL13AP5 |          |
| PPRC1          | MRPL23                      | NUP98                                                          | ZNF143           | RPS13             | NDUFS3   | FNBP4             | MRPL16   | CPSF7    | SDHAF2   |
| INCENP         | MTA2                        | SF1                                                            | KLC2             | LAMTOR1           | CLPB     | C11orf30          |          | INTS4    | USP28    |
| PCSK7          | ATP5L                       | RPS25                                                          | DPAGT1           | TBCEL             | KCNJ5    | RAD52             | C12orf57 |          | DDX23    |
| SPRYD3         | PHC1P1                      | SLC25A3                                                        | SART3            | TMEM119           | COX6A1   | RPS7P10           | SACS     | LPAR6    | COMMD6   |
| ACIN1          | RPS29                       | BCRP2                                                          | ERH              | NEK9              | POMT2    | NDUFB1            | GLRX5    | RPL3P4   | BTBD6    |
| SLC24A5        | RSL24D1                     | PIGB                                                           | GTF2A2           | FAM96A            | NDUFB10  | NPIPL3            | POLR3E   | NDUFAB1  | KIF22    |
| BCL7C          | MIR4519                     | PYCARD                                                         | C16orf57         |                   | NAE1     | RANBP10           | AARS     | DDX19A   | SF3B3    |
| USP10          | ZNF469                      | NDEL1                                                          | CDRT4            | FAM106B           | LIG3     | MLLT6             | RPL17    | PGAP3    | VPS25    |
| RPL27          | SAMD14                      | HILS1                                                          | SUPT4H1          | SKA2              | H3F3B    | CBX4              | C17orf90 |          | ZFP161   |
| IMPACT         | UQCR11                      | C19orf10                                                       |                  | C19orf70          |          | RPL36             | TRIP10   | PEX11G   | CARM1    |
| PGLS           | ZNF85                       | UQCRFS1                                                        | ANKRD27          | CLASRP            | TRAPPC6A |                   | RTN2     | SNRPD2   | ZNF541   |
| TBC1D17        | CLEC11A                     | CNOT3                                                          | RPS9             | NLRP9             | ZIK1     | ZNF552            | TBC1D20  | ZNF343   | FTLP3    |
| SNRPB2         | TM9SF4                      | ROMO1                                                          | SNHG11           | PFDN4             | STMN3    | ATP5J             | MIS18A   | C21orf67 |          |
| MRPL40         | DGCR6L                      | PI4KA                                                          | BCR              | CRYBB3            | UQCR10   | PIK3IP1           | APOBEC3H |          | RANGAP1  |
| GTPBP6         | SLC25A6                     | EEF1B2P3                                                       |                  | ATP6AP2           | RPS2P55  | TIMP1             | RPL7P57  | PHF8     | PDZD11   |
| RPS23P8        | MED12                       | RGAG4                                                          | TREX2            | ARHGAP4           |          |                   |          |          |          |
| GOBPID         | Pvalue                      | OddsRatio                                                      | ExpCount         | Count             | Size     | Term              |          |          |          |
| GO:0022904     |                             | 1.88458437076499e-18                                           | 18.9515789473684 |                   |          | 1.52792194311812  |          |          |          |
| 21             | 96                          | respiratory electron transport chain                           |                  |                   |          |                   |          |          |          |
| GO:0022900     |                             | 2.47680787658444e-15                                           | 12.5446923826057 |                   |          | 2.13272437893571  |          |          |          |
| 21             | 134                         | electron transport chain                                       |                  |                   |          |                   |          |          |          |
| GO:0045333     |                             | 8.25666345961817e-15                                           | 11.7086480287872 |                   |          | 2.26005120752889  |          |          |          |
| 21             | 142                         | cellular respiration                                           |                  |                   |          |                   |          |          |          |
| GO:0006614     |                             | 7.07593781295201e-13                                           | 12.8180217669654 |                   |          | 1.67116462528545  |          |          |          |
| 17             | 105                         | SRP-dependent cotranslational protein targeting to membrane    |                  |                   |          |                   |          |          |          |
| GO:0006613     |                             | 8.30987319424839e-13                                           | 12.6731022841167 |                   |          | 1.68708047885959  |          |          |          |
| 17             | 106                         | cotranslational protein targeting to membrane                  |                  |                   |          |                   |          |          |          |
| GO:0045047     |                             | 8.30987319424839e-13                                           | 12.6731022841167 |                   |          | 1.68708047885959  |          |          |          |
| 17             | 106                         | protein targeting to ER                                        |                  |                   |          |                   |          |          |          |
| GO:0072599     |                             | 8.30987319424839e-13                                           | 12.6731022841167 |                   |          | 1.68708047885959  |          |          |          |
| 17             | 106                         | establishment of protein localization to endoplasmic reticulum |                  |                   |          |                   |          |          |          |
| GO:0006119     |                             | 5.01854264201393e-12                                           | 18.8722990271377 |                   |          | 0.923119507300533 |          |          |          |
| 13             | 58                          | oxidative phosphorylation                                      |                  |                   |          |                   |          |          |          |
| GO:0070972     |                             | 5.0241719492898e-12                                            | 11.1579045228467 |                   |          | 1.87807072174936  |          |          |          |



Stable4\_20PerPair

|                |                             |                                                                     |                  |                   |                    |         |          |       |
|----------------|-----------------------------|---------------------------------------------------------------------|------------------|-------------------|--------------------|---------|----------|-------|
| 17             | 118                         | protein localization to endoplasmic reticulum                       |                  |                   |                    |         |          |       |
| GO:0042773     |                             | 6.33921836763452e-12                                                | 22.310878112713  | 0.748045117984915 |                    |         |          | 12    |
| 47             |                             | ATP synthesis coupled electron transport                            |                  |                   |                    |         |          |       |
| GO:0042775     |                             | 6.33921836763452e-12                                                | 22.310878112713  | 0.748045117984915 |                    |         |          | 12    |
| 47             |                             | mitochondrial ATP synthesis coupled electron transport              |                  |                   |                    |         |          |       |
| GO:0006612     |                             | 3.84007161473665e-11                                                | 8.85911949685535 |                   | 2.43512559684451   |         |          |       |
| 18             | 153                         | protein targeting to membrane                                       |                  |                   |                    |         |          |       |
| GO:0000184     |                             | 6.33694622180209e-11                                                | 10.2480718628074 |                   | 1.89398657532351   |         |          |       |
| 16             | 119                         | nuclear-transcribed mRNA catabolic process, nonsense-mediated decay |                  |                   |                    |         |          |       |
| GO:0006414     |                             | 1.05640758098325e-10                                                | 10.9542635658915 |                   | 1.67116462528545   |         |          |       |
| 15             | 105                         | translational elongation                                            |                  |                   |                    |         |          |       |
| GO:0015980     |                             | 1.26958528003733e-10                                                | 5.73796699715256 |                   | 4.88616704726317   |         |          |       |
| 24             | 307                         | energy derivation by oxidation of organic compounds                 |                  |                   |                    |         |          |       |
| GO:0006415     |                             | 1.62733343099736e-10                                                | 11.9057239057239 |                   | 1.44834267524739   |         |          |       |
| 14             | 91                          | translational termination                                           |                  |                   |                    |         |          |       |
| GO:0000956     |                             | 2.03489396210353e-10                                                | 7.91140822191678 |                   | 2.68977925403086   |         |          |       |
| 18             | 169                         | nuclear-transcribed mRNA catabolic process                          |                  |                   |                    |         |          |       |
| GO:0006413     |                             | 3.05447468900562e-10                                                | 8.32766475395583 |                   | 2.41920974327036   |         |          |       |
| 17             | 152                         | translational initiation                                            |                  |                   |                    |         |          |       |
| GO:0006402     |                             | 4.79192681795886e-10                                                | 7.46161556603774 |                   | 2.83302193619819   |         |          |       |
| 18             | 178                         | mRNA catabolic process                                              |                  |                   |                    |         |          |       |
| GO:0019080     |                             | 2.30109816367139e-09                                                | 7.80117687781239 |                   | 2.40329388969621   |         |          |       |
| 16             | 151                         | viral genome expression                                             |                  |                   |                    |         |          |       |
| GO:0019083     |                             | 2.30109816367139e-09                                                | 7.80117687781239 |                   | 2.40329388969621   |         |          |       |
| 16             | 151                         | viral transcription                                                 |                  |                   |                    |         |          |       |
| GO:0072594     |                             | 4.3470597684874e-09                                                 | 6.40672550213025 |                   | 3.24683412912601   |         |          |       |
| 18             | 204                         | establishment of protein localization to organelle                  |                  |                   |                    |         |          |       |
| GO:0006401     |                             | 4.69892492085097e-09                                                | 6.37201089698315 |                   | 3.26274998270016   |         |          |       |
| 18             | 205                         | RNA catabolic process                                               |                  |                   |                    |         |          |       |
| GO:0019058     |                             | 5.12462939122301e-09                                                | 5.95034874362872 |                   | 3.67656217562798   |         |          |       |
| 19             | 231                         | viral infectious cycle                                              |                  |                   |                    |         |          |       |
| GO:0006091     |                             | 2.10454133579994e-08                                                | 4.1814440476911  | 6.81198532973497  |                    |         |          | 25    |
| 428            |                             | generation of precursor metabolites and energy                      |                  |                   |                    |         |          |       |
| GO:0043624     |                             | 2.14279131117529e-08                                                | 7.11981799797775 |                   | 2.43512559684451   |         |          |       |
| 15             | 153                         | cellular protein complex disassembly                                |                  |                   |                    |         |          |       |
| GO:0043241     |                             | 3.3111925186411e-08                                                 | 6.86843389168971 |                   | 2.51470486471524   |         |          |       |
| 15             | 158                         | protein complex disassembly                                         |                  |                   |                    |         |          |       |
| GO:0022415     |                             | 3.51702201328691e-08                                                | 5.22349609643861 |                   | 4.13812192927825   |         |          |       |
| 19             | 260                         | viral reproductive process                                          |                  |                   |                    |         |          |       |
| GO:0006120     |                             | 7.51400194916751e-08                                                | 18.2664092664093 |                   | 0.572970728669296  |         |          |       |
| 8              | 36                          | mitochondrial electron transport, NADH to ubiquinone                |                  |                   |                    |         |          |       |
| GO:0034623     |                             | 1.19904119548825e-07                                                | 6.17025010969724 |                   | 2.7693585219016    |         |          | 15    |
| 174            |                             | cellular macromolecular complex disassembly                         |                  |                   |                    |         |          |       |
| GO:0006605     |                             | 1.52243093578566e-07                                                | 3.74056168178608 |                   | 7.54411459414573   |         |          |       |
| 25             | 474                         | protein targeting                                                   |                  |                   |                    |         |          |       |
| GO:0032984     |                             | 1.74020569964455e-07                                                | 5.98000567214974 |                   | 2.84893778977233   |         |          |       |
| 15             | 179                         | macromolecular complex disassembly                                  |                  |                   |                    |         |          |       |
| GO:0071845     |                             | 6.79424322897455e-07                                                | 4.45435522769187 |                   | 4.52010241505778   |         |          |       |
| 18             | 284                         | cellular component disassembly at cellular level                    |                  |                   |                    |         |          |       |
| GO:0022411     |                             | 8.32543055384426e-07                                                | 4.38710691823899 |                   | 4.58376582935437   |         |          |       |
| 18             | 288                         | cellular component disassembly                                      |                  |                   |                    |         |          |       |
| GO:0033365     |                             | 1.9965500502194e-06                                                 | 3.40024691358025 |                   | 7.52819874057159   |         |          |       |
| 23             | 473                         | protein localization to organelle                                   |                  |                   |                    |         |          |       |
| GO:0016032     |                             | 3.2040933158498e-06                                                 | 3.40039447731755 |                   | 7.17804996194035   |         |          |       |
| 22             | 451                         | viral reproduction                                                  |                  |                   |                    |         |          |       |
| GO:0006122     |                             | 1.57328230397114e-05                                                | 187.929515418502 |                   | 0.0636634142965885 |         |          |       |
| 3              | 4                           | mitochondrial electron transport, ubiquinol to cytochrome c         |                  |                   |                    |         |          |       |
| Tissue:        | Nerve_Tibial=>Artery_Tibial | Type:                                                               | asymmetric       |                   |                    |         |          |       |
| SourceGene:    | ENSG00000258604.1           |                                                                     |                  |                   |                    |         |          |       |
| TargetGeneSet: | MTND1P23                    | RPL22                                                               | KHDRBS1          | RP11              | ADORA3             | KCNT2   | UBC      |       |
| PLEKHB2        | SATB2                       | EEF1B2                                                              | AGFG1            | RPL15             | RPL14              | STAB1   | RPL10AP6 | RPL24 |
| SEC62          | RAC1P2                      | CTD                                                                 | RPL10A           | MRPL2             | EIF4H              | FAM71F1 | CLEC5A   | RPL7  |
| RPL35          | RPS13                       | SAA2-SAA4                                                           | SAA1             | RPL41             | RPL14P1            | CHPT1   | RPL7AP6  | NETO2 |

Stable4\_20PerPair

| ZNF29P                              | RPS7P1 | RPL23A                   | RPL17                | RPL19    | RAB31            | CRLF1             | FXDY1  | HNRNPL                                                              | PRR24             |
|-------------------------------------|--------|--------------------------|----------------------|----------|------------------|-------------------|--------|---------------------------------------------------------------------|-------------------|
| RPL18                               | SYP    | RPL10                    |                      |          |                  |                   |        |                                                                     |                   |
| GOBPID                              | Pvalue | OddsRatio                |                      | ExpCount |                  | Count             | Size   | Term                                                                |                   |
| GO:0006414                          | 17     | 105                      | 4.60435519401376e-28 |          | 153.772727272727 |                   |        | translational elongation                                            | 0.254307660369525 |
| GO:0006613                          | 17     | 106                      | 5.47734464382063e-28 |          | 152.034332084894 |                   |        | cotranslational protein targeting to membrane                       | 0.25672963808733  |
| GO:0006415                          | 16     | 91                       | 5.61898119021901e-27 |          | 161.021754385965 |                   |        | translational termination                                           | 0.220399972320255 |
| GO:0006614                          | 16     | 105                      | 6.63757336611401e-26 |          | 135.560023654642 |                   |        | SRP-dependent cotranslational protein targeting to membrane         | 0.254307660369525 |
| GO:0045047                          | 16     | 106                      | 7.80784890738954e-26 |          | 134.044444444444 |                   |        | protein targeting to ER                                             | 0.25672963808733  |
| GO:0072599                          | 16     | 106                      | 7.80784890738954e-26 |          | 134.044444444444 |                   |        | establishment of protein localization to endoplasmic reticulum      | 0.25672963808733  |
| GO:0006413                          | 17     | 152                      | 3.64041620113799e-25 |          | 99.9082304526749 |                   |        | translational initiation                                            | 0.368140613106359 |
| GO:0006612                          | 17     | 153                      | 4.09060402366082e-25 |          | 99.1666666666667 |                   |        | protein targeting to membrane                                       | 0.370562590824164 |
| GO:0070972                          | 16     | 118                      | 4.85756512067118e-25 |          | 118.175438596491 |                   |        | protein localization to endoplasmic reticulum                       | 0.28579337070099  |
| GO:0000184                          | 16     | 119                      | 5.60514234428549e-25 |          | 117.019928461932 |                   |        | nuclear-transcribed mRNA catabolic process, nonsense-mediated decay | 0.288215348418795 |
| GO:0019080                          | 151    | viral genome expression  | 3.06778938257395e-23 |          | 89.082261208577  | 0.365718635388554 | 16     |                                                                     |                   |
| GO:0019083                          | 151    | viral transcription      | 3.06778938257395e-23 |          | 89.082261208577  | 0.365718635388554 | 16     |                                                                     |                   |
| GO:0043624                          | 16     | 153                      | 3.81957819605949e-23 |          | 87.7694967345371 |                   |        | cellular protein complex disassembly                                | 0.370562590824164 |
| GO:0043241                          | 16     | 158                      | 6.52086191731666e-23 |          | 84.6493699036323 |                   |        | protein complex disassembly                                         | 0.382672479413189 |
| GO:0000956                          | 16     | 169                      | 1.99037797474661e-22 |          | 78.5029239766082 |                   |        | nuclear-transcribed mRNA catabolic process                          | 0.409314234309044 |
| GO:0034623                          | 16     | 174                      | 3.22294709479738e-22 |          | 75.9920053297801 |                   |        | cellular macromolecular complex disassembly                         | 0.421424122898069 |
| GO:0006402                          | 16     | 178                      | 4.68991096999289e-22 |          | 74.0948667966212 |                   |        | mRNA catabolic process                                              | 0.431112033769289 |
| GO:0032984                          | 16     | 179                      | 5.14382636216027e-22 |          | 73.6351307717146 |                   |        | macromolecular complex disassembly                                  | 0.433534011487094 |
| GO:0072594                          | 16     | 204                      | 4.40408747444263e-21 |          | 63.7312430011198 |                   |        | establishment of protein localization to organelle                  | 0.494083454432219 |
| GO:0006401                          | 16     | 205                      | 4.77093386266361e-21 |          | 63.3895850737956 |                   |        | RNA catabolic process                                               | 0.496505432150024 |
| GO:0019058                          | 16     | 231                      | 3.3435978412586e-20  |          | 55.6220318237454 |                   |        | viral infectious cycle                                              | 0.559476852812954 |
| GO:0022415                          | 16     | 260                      | 2.27217933231035e-19 |          | 48.9111302847282 |                   |        | viral reproductive process                                          | 0.629714206629299 |
| GO:0071845                          | 16     | 284                      | 9.42866345048754e-19 |          | 44.4556166535742 |                   |        | cellular component disassembly at cellular level                    | 0.687841671856619 |
| GO:0022411                          | 16     | 288                      | 1.18057012549749e-18 |          | 43.7894736842105 |                   |        | cellular component disassembly                                      | 0.697529582727839 |
| GO:0006605                          | 17     | 474                      | 1.16826820766969e-16 |          | 28.8479212253829 |                   |        | protein targeting                                                   | 1.14801743823957  |
| GO:0016032                          | 16     | 451                      | 1.46671598495031e-15 |          | 27.0654567453116 |                   |        | viral reproduction                                                  | 1.09231195073005  |
| GO:0033365                          | 16     | 473                      | 3.09473638919039e-15 |          | 25.7219854888863 |                   |        | protein localization to organelle                                   | 1.14559546052176  |
| Tissue: Nerve_Tibial=>Artery_Tibial |        |                          |                      |          |                  | Type: asymmetric  |        |                                                                     |                   |
| SourceGene:                         |        | GBA2(ENSG00000070610.10) |                      |          |                  |                   |        |                                                                     |                   |
| TargetGeneSet:                      | RPL22  | ZBTB40                   | PP1E                 | RPS8     | RP11             | WDR77             | BCAS2  | HIST2H2AC                                                           |                   |
| SMG5                                | HDGF   | KCNJ9                    | SMYD2                | LYPLAL1  | PSEN2            | DDIT3             | HAAO   | RPL31                                                               | ANKRD44           |
| SATB2                               | TATDN2 | RPL15                    | CTDSPL               | KRBOX1   | ZDHC3            | RNF123            | RPL29  | ZNF717                                                              | DZIP3             |
| NDUFB4                              | ALG1L  | EIF4G1                   | TRA2B                | OCIAD1   | CLOCK            | MAPK10            | NDUFC1 | TAF9                                                                | PCDHB16           |

Stable4\_20PerPair

| Gene       | Gene    | Gene                 | Gene             | Gene             | Gene             | Gene                                                                | Gene      | Gene     | Gene    | Gene |
|------------|---------|----------------------|------------------|------------------|------------------|---------------------------------------------------------------------|-----------|----------|---------|------|
| ARL10      | RPS10   | RPL10A               | XPO5             | MICAL1           | C7orf50          | IQCE                                                                | GPNMB     | CDK13    | IMPDH1  | RP4  |
| DCTN6      | C8orf40 | PAF1                 | GS1              | ZNF706           | DCTN3            | FAM27D1                                                             | VPS13A    | RABGAP1  | RPL35   |      |
| RPL12      | SLC27A4 | CAMSAP1              | CXCL12           | RP13             | ACTR1A           | RPL27A                                                              | MRVI1-AS1 | MRVI1    | MRVI1   |      |
| RPS13      | RARRES3 | CPT1A                | CTD              | CBL              | LTBR             | RARG                                                                | STAT2     | TIMELESS |         |      |
| PIP4K2C    | YEATS4  | RP1                  | CHPT1            | EID3             | C12orf51         |                                                                     | MLEC      | DIABLO   | TPTE2P6 |      |
| KATNAL1    | DGKZP1  | MED4                 | DHRS12           | POMT2            | AKT1             | KIAA0284                                                            |           | AVEN     | RPLP1   |      |
| ZNF592     | NUDT21  | DOK4                 | FHOD1            | WWOX             | COX4I1           | RPL13                                                               | KIF1C     | KCTD11   | FLII    |      |
| C17orf108  |         | SPAG5-AS1            |                  | KIAA0100         |                  | RPL23A                                                              | PIP4K2B   | RPL19    | MSL1    | ACLY |
| ATXN7L3    | TRIM65  | RPL36                | DNMT1            | KCTD15           | RPL18            | TBC1D20                                                             | DUSP15    | SOGA1    | RALGAPB |      |
| DHX35      | ELMO2   | COL18A1              | CECR5            | PI4KA            | RANGAP1          | TCF20                                                               | SYP       | MAGED2   | KLF8    |      |
| NAP1L2     | TCEAL7  |                      |                  |                  |                  |                                                                     |           |          |         |      |
| GOBPID     | Pvalue  | OddsRatio            | ExpCount         | Count            | Size             | Term                                                                |           |          |         |      |
| GO:0000184 |         | 4.19812441977784e-20 | 29.0904301075269 | 29.0904301075269 |                  | 0.922289114940143                                                   |           |          |         |      |
| 19         | 119     |                      |                  |                  |                  | nuclear-transcribed mRNA catabolic process, nonsense-mediated decay |           |          |         |      |
| GO:0006415 |         | 2.67184523221966e-19 | 34.4957325746799 | 34.4957325746799 |                  | 0.705279911424815                                                   |           |          |         |      |
| 17         | 91      |                      |                  |                  |                  | translational termination                                           |           |          |         |      |
| GO:0006414 |         | 3.49151455770065e-18 | 28.9793062200957 | 28.9793062200957 |                  | 0.813784513182479                                                   |           |          |         |      |
| 17         | 105     |                      |                  |                  |                  | translational elongation                                            |           |          |         |      |
| GO:0006614 |         | 3.49151455770065e-18 | 28.9793062200957 | 28.9793062200957 |                  | 0.813784513182479                                                   |           |          |         |      |
| 17         | 105     |                      |                  |                  |                  | SRP-dependent cotranslational protein targeting to membrane         |           |          |         |      |
| GO:0006613 |         | 4.13247995207642e-18 | 28.6516853932584 | 28.6516853932584 |                  | 0.821534841879455                                                   |           |          |         |      |
| 17         | 106     |                      |                  |                  |                  | cotranslational protein targeting to membrane                       |           |          |         |      |
| GO:0045047 |         | 4.13247995207642e-18 | 28.6516853932584 | 28.6516853932584 |                  | 0.821534841879455                                                   |           |          |         |      |
| 17         | 106     |                      |                  |                  |                  | protein targeting to ER                                             |           |          |         |      |
| GO:0072599 |         | 4.13247995207642e-18 | 28.6516853932584 | 28.6516853932584 |                  | 0.821534841879455                                                   |           |          |         |      |
| 17         | 106     |                      |                  |                  |                  | establishment of protein localization to endoplasmic reticulum      |           |          |         |      |
| GO:0070972 |         | 2.74357353697432e-17 | 25.2262636789995 | 25.2262636789995 |                  | 0.914538786243167                                                   |           |          |         |      |
| 17         | 118     |                      |                  |                  |                  | protein localization to endoplasmic reticulum                       |           |          |         |      |
| GO:0000956 |         | 3.85574698609524e-17 | 19.3255197132616 | 19.3255197132616 |                  | 1.30980554978894                                                    |           |          |         |      |
| 19         | 169     |                      |                  |                  |                  | nuclear-transcribed mRNA catabolic process                          |           |          |         |      |
| GO:0006402 |         | 1.03274059701408e-16 | 18.2200581591939 | 18.2200581591939 |                  | 1.37955850806173                                                    |           |          |         |      |
| 19         | 178     |                      |                  |                  |                  | mRNA catabolic process                                              |           |          |         |      |
| GO:0006413 |         | 1.08657065817354e-16 | 20.2993013655129 | 20.2993013655129 |                  | 1.17804996194035                                                    |           |          |         |      |
| 18         | 152     |                      |                  |                  |                  | translational initiation                                            |           |          |         |      |
| GO:0043624 |         | 1.22379974471189e-16 | 20.1475177304965 | 20.1475177304965 |                  | 1.18580029063733                                                    |           |          |         |      |
| 18         | 153     |                      |                  |                  |                  | cellular protein complex disassembly                                |           |          |         |      |
| GO:0043241 |         | 2.1899510816277e-16  | 19.4211246200608 | 19.4211246200608 |                  | 1.22455193412221                                                    |           |          |         |      |
| 18         | 158     |                      |                  |                  |                  | protein complex disassembly                                         |           |          |         |      |
| GO:0034623 |         | 1.23826262812777e-15 | 17.4095744680851 | 17.4095744680851 |                  | 1.34855719327382                                                    |           |          |         |      |
| 18         | 174     |                      |                  |                  |                  | cellular macromolecular complex disassembly                         |           |          |         |      |
| GO:0006401 |         | 1.4638504110895e-15  | 15.5455543993525 | 15.5455543993525 |                  | 1.58881738288008                                                    |           |          |         |      |
| 19         | 205     |                      |                  |                  |                  | RNA catabolic process                                               |           |          |         |      |
| GO:0019080 |         | 1.94316001343214e-15 | 18.9697564807541 | 18.9697564807541 |                  | 1.17029963324337                                                    |           |          |         |      |
| 17         | 151     |                      |                  |                  |                  | viral genome expression                                             |           |          |         |      |
| GO:0019083 |         | 1.94316001343214e-15 | 18.9697564807541 | 18.9697564807541 |                  | 1.17029963324337                                                    |           |          |         |      |
| 17         | 151     |                      |                  |                  |                  | viral transcription                                                 |           |          |         |      |
| GO:0032984 |         | 2.05195752714321e-15 | 16.8629575789613 | 16.8629575789613 |                  | 1.3873088367587                                                     | 18        |          |         |      |
| 179        |         |                      |                  |                  |                  | macromolecular complex disassembly                                  |           |          |         |      |
| GO:0006612 |         | 2.43064543588102e-15 | 18.6881578947368 | 18.6881578947368 |                  | 1.18580029063733                                                    |           |          |         |      |
| 17         | 153     |                      |                  |                  |                  | protein targeting to membrane                                       |           |          |         |      |
| GO:0072594 |         | 2.0648227822419e-14  | 14.5706932052162 | 14.5706932052162 |                  | 1.5810670541831                                                     | 18        |          |         |      |
| 204        |         |                      |                  |                  |                  | establishment of protein localization to organelle                  |           |          |         |      |
| GO:0019058 |         | 2.25520135315448e-12 | 11.8113625184456 | 11.8113625184456 |                  | 1.79032592900145                                                    |           |          |         |      |
| 17         | 231     |                      |                  |                  |                  | viral infectious cycle                                              |           |          |         |      |
| GO:0071845 |         | 6.0318344171858e-12  | 10.130939049752  | 10.130939049752  | 2.20109334994118 |                                                                     |           |          |         | 18   |
| 284        |         |                      |                  |                  |                  | cellular component disassembly at cellular level                    |           |          |         |      |
| GO:0022411 |         | 7.62577873374238e-12 | 9.97801418439716 | 9.97801418439716 |                  | 2.23209466472908                                                    |           |          |         |      |
| 18         | 288     |                      |                  |                  |                  | cellular component disassembly                                      |           |          |         |      |
| GO:0006605 |         | 1.05901152812948e-11 | 7.51017699115044 | 7.51017699115044 |                  | 3.67365580236662                                                    |           |          |         |      |
| 22         | 474     |                      |                  |                  |                  | protein targeting                                                   |           |          |         |      |
| GO:0022415 |         | 1.50265383879605e-11 | 10.3804201862681 | 10.3804201862681 |                  | 2.01508546121376                                                    |           |          |         |      |
| 17         | 260     |                      |                  |                  |                  | viral reproductive process                                          |           |          |         |      |
| GO:0033365 |         | 3.57356105773459e-09 | 6.2482828856994  | 6.2482828856994  | 3.66590547366964 |                                                                     |           |          |         | 19   |

Stable4\_20PerPair

473 protein localization to organelle  
GO:0016032 1.06978778669909e-08 6.14977150999951 3.49539824233617  
18 451 viral reproduction  
Tissue: Nerve\_Tibial=>Artery\_Tibial Type: asymmetric  
SourceGene: HDAC6(ENSG00000094631.13)  
TargetGeneSet: RPL22 HMG2 KHDRBS1 RPS8 IPP RP11 CD53 DPM3  
KCNJ9 FCER1G FCGR3A SFT2D2 KCNT2 SNRPE SRGAP3 CAPN8 LRPPRC CAMKMT UBC  
RPL31 TTL MZT2A ANKRD44 SATB2 STK36 SLC23A3 RPL15 RPL14 RPL24  
ALCAM ALG1L FAM86HP PCOLCE2 PARL CLOCK NAP1L5 RXFP1 CTD THOC3 RP1  
RPS10 RPL10A MRPL2 EFHC1 MRAP2 SNHG5 MICAL1 MRPS12 C7orf50 ABCB5  
TOMM7 OSBPL3 EIF4H GTF2IP1 SSBP1 RARRES2 RPL7 EIF3H EEF1D RPS6  
POLR1E C9orf103 SLC44A1 C9orf43 RPL35 RPL12 AKR1C2 DDIT4 EIF3F  
RPS13 MS4A7 RARRES3 RPS3 PHB2 AEBP2 CYP27B1 STAT2 RPL18AP3 RPL6  
MLEC MED4 TMC03 RPS29 GS1 RPS3AP6 RPLP1 BCL7C NETO2 NUDT21  
FHOD1 EXOSC6 COX4I1 RPL13 C17orf108 KIAA0100 RPL23A RPL17  
RPL19 CCR10 HEXIM2 PPP4R1 RPS15 SNRPEP4 RPL36 RPL18A FXYD1 OVOL3  
HNRNPL RPS16 PRR24 RPL18 SIGLEC9 RPL28 ZNF530 RPL24P2 NDRG3 ELMO2  
PPDPF SLC2A4RG CLIC6 GPKOW SYP SRPX2 RBMX RPL10  
GOBPID Pvalue OddsRatio ExpCount Count Size Term  
GO:0006415 1.82808473763696e-41 91.5428634555899 0.642308490761885  
29 91 translational termination  
GO:0006414 2.94892989231113e-41 79.3 0.741125181648329 30 105  
translational elongation  
GO:0006614 2.27785307734369e-39 74.6065248738284 0.741125181648329  
29 105 SRP-dependent cotranslational protein targeting to membrane  
GO:0006413 2.67922162204485e-39 54.2057142857143 1.07286692962425  
32 152 translational initiation  
GO:0006613 3.12033054069613e-39 73.6324497420388 0.748183516711646  
29 106 cotranslational protein targeting to membrane  
GO:0045047 3.12033054069613e-39 73.6324497420388 0.748183516711646  
29 106 protein targeting to ER  
GO:0072599 3.12033054069613e-39 73.6324497420388 0.748183516711646  
29 106 establishment of protein localization to endoplasmic reticulum  
GO:0070972 1.05707251201559e-37 63.6509158072957 0.832883537471455  
29 118 protein localization to endoplasmic reticulum  
GO:0000184 1.39080826296839e-37 62.9392694063927 0.839941872534773  
29 119 nuclear-transcribed mRNA catabolic process, nonsense-mediated decay  
GO:0043241 5.24348696189237e-37 48.8945325496285 1.11521694000415  
31 158 protein complex disassembly  
GO:0043624 8.84432528147779e-36 48.1910569105691 1.07992526468756  
30 153 cellular protein complex disassembly  
GO:0032984 3.3630335073767e-35 41.8948420251237 1.26344197633382  
31 179 macromolecular complex disassembly  
GO:0000956 2.19848923185318e-34 42.5959232613909 1.19285862570064  
30 169 nuclear-transcribed mRNA catabolic process  
GO:0019080 2.76508618823873e-34 46.3264091623625 1.06580859456093  
29 151 viral genome expression  
GO:0019083 2.76508618823873e-34 46.3264091623625 1.06580859456093  
29 151 viral transcription  
GO:0006612 4.17468835703725e-34 45.5728015908087 1.07992526468756  
29 153 protein targeting to membrane  
GO:0034623 5.59434162136755e-34 41.1024305555556 1.22815030101723  
30 174 cellular macromolecular complex disassembly  
GO:0006402 1.15585282491115e-33 39.9802927927928 1.2563836412705 30  
178 mRNA catabolic process  
GO:0072594 8.61177604755942e-32 33.9439655172414 1.43990035291675  
30 204 establishment of protein localization to organelle  
GO:0006401 1.00388074289027e-31 33.747619047619 1.44695868798007 30  
205 RNA catabolic process  
GO:0019058 1.19180948039549e-28 27.8219856232199 1.63047539962632  
29 231 viral infectious cycle  
GO:0022411 1.48329247308381e-28 23.9410314024223 2.03280049823542  
31 288 cellular component disassembly

Stable4\_20PerPair

|                                     |                            |                                                                     |                   |        |          |         |         |          |           |
|-------------------------------------|----------------------------|---------------------------------------------------------------------|-------------------|--------|----------|---------|---------|----------|-----------|
| GO:0022415                          | 1.56525903941967e-28       | 25.5778985507246                                                    | 1.83516711646253  |        |          |         |         |          |           |
| 30                                  | 260                        | viral reproductive process                                          |                   |        |          |         |         |          |           |
| GO:0071845                          | 2.29052558913642e-27       | 23.121719160105                                                     | 2.00456715798215  |        |          |         |         |          |           |
| 284                                 | cellular                   | component disassembly at cellular level                             | 30                |        |          |         |         |          |           |
| GO:0016032                          | 1.9413471071617e-21        | 13.784639746635                                                     | 3.18330911355616  |        |          |         |         |          |           |
| 451                                 | viral                      | reproduction                                                        | 30                |        |          |         |         |          |           |
| GO:0033365                          | 7.61119892224637e-21       | 13.0793829947329                                                    | 3.33859248494914  |        |          |         |         |          |           |
| 30                                  | 473                        | protein localization to organelle                                   |                   |        |          |         |         |          |           |
| GO:0006605                          | 8.08510821876735e-21       | 13.0489864864865                                                    | 3.34565082001246  |        |          |         |         |          |           |
| 30                                  | 474                        | protein targeting                                                   |                   |        |          |         |         |          |           |
| GO:0042274                          | 6.63466085483646e-06       | 41.7930029154519                                                    | 0.127050031139714 |        |          |         |         |          |           |
| 4                                   | 18                         | ribosomal small subunit biogenesis                                  |                   |        |          |         |         |          |           |
| GO:0006364                          | 8.60311641238993e-06       | 10.8262615301139                                                    | 0.734066846585011 |        |          |         |         |          |           |
| 7                                   | 104                        | rRNA processing                                                     |                   |        |          |         |         |          |           |
| GO:0016072                          | 1.24500930613032e-05       | 10.1913132345427                                                    | 0.776416856964916 |        |          |         |         |          |           |
| 7                                   | 110                        | rRNA metabolic process                                              |                   |        |          |         |         |          |           |
| Tissue: Nerve_Tibial=>Artery_Tibial | Type:                      | asymmetric                                                          |                   |        |          |         |         |          |           |
| SourceGene:                         | HLA-DMA(ENSG00000204257.8) |                                                                     |                   |        |          |         |         |          |           |
| TargetGeneSet:                      | RP11                       | HMG2                                                                | KHDRBS1           | STK40  | RPS8     | IPP     | POMGNT1 | SMG5     | HDGF      |
| LYPLAL1                             | EIF3FP3                    | RPL31                                                               | MAP3K2            | SATB2  | PPP1R7   | TATDN2  | CHDH    | RPL10AP6 |           |
| DZIP3                               | LIAS                       | OTUD4                                                               | COX7C             | CTD    | ARL10    | RPS10   | RPL10A  | XPO5     | MRPS12    |
| GTF2H5                              | C7orf50                    | TOMM7                                                               | SLC4A2            | AGPAT6 | CHCHD7   | RPL7    | COX6C   | EIF3H    | RPS6      |
| DCTN3                               | C9orf103                   |                                                                     | RPL35             | RPL12  | VAV2     | RP13    | CARS    | RPS13    | DAK       |
| PRDM10                              | TULP3                      | TNFRSF1A                                                            |                   | STAT2  | XPOT     | NDUFA12 | CHPT1   | EID3     | C12orf51  |
| DHRS12                              | CMTM5                      | RPS29                                                               | RPL7AP6           | AKT1   | KIAA0284 |         | HERC2P3 | HMG2P5   | RPLP1     |
| MAN2A2                              | C16orf79                   |                                                                     | FHOD1             | HSDL1  | COX4I1   | CYB5D2  | MINK1   | FLII     | C17orf108 |
| RPL17                               | RPL19                      | HEXIM2                                                              | MRPL45P2          |        | NPEPPS   | BAHCC1  | PPP4R1  | DNMT1    | PRKCSH    |
| SUGP2                               | COX6B1                     | NDUFA3                                                              | RPS9              | RPL28  | ZNF667   | ZSCAN1  | TBC1D20 | ELMO2    | RPS21     |
| APOBEC3G                            |                            | RANGAP1                                                             | EFCAB6            | SYP    | KLF8     | RP3     | RPL10   |          |           |
| GOBPID                              | Pvalue                     | OddsRatio                                                           | ExpCount          | Count  | Size     | Term    |         |          |           |
| GO:0006415                          | 1.81110837456362e-21       | 48.2837837837838                                                    | 0.535257075634904 |        |          |         |         |          |           |
| 17                                  | 91                         | translational termination                                           |                   |        |          |         |         |          |           |
| GO:0000184                          | 6.10927534779988e-21       | 37.9444362346682                                                    | 0.699951560445644 |        |          |         |         |          |           |
| 18                                  | 119                        | nuclear-transcribed mRNA catabolic process, nonsense-mediated decay |                   |        |          |         |         |          |           |
| GO:0006414                          | 2.42646128577078e-20       | 40.5625                                                             | 0.617604318040274 |        |          |         |         |          |           |
| 17                                  | 105                        | translational elongation                                            |                   |        |          |         |         |          |           |
| GO:0006614                          | 2.42646128577078e-20       | 40.5625                                                             | 0.617604318040274 |        |          |         |         |          |           |
| 17                                  | 105                        | SRP-dependent cotranslational protein targeting to membrane         |                   |        |          |         |         |          |           |
| GO:0006613                          | 2.87702575868489e-20       | 40.1039325842697                                                    | 0.623486263926372 |        |          |         |         |          |           |
| 17                                  | 106                        | cotranslational protein targeting to membrane                       |                   |        |          |         |         |          |           |
| GO:0045047                          | 2.87702575868489e-20       | 40.1039325842697                                                    | 0.623486263926372 |        |          |         |         |          |           |
| 17                                  | 106                        | protein targeting to ER                                             |                   |        |          |         |         |          |           |
| GO:0072599                          | 2.87702575868489e-20       | 40.1039325842697                                                    | 0.623486263926372 |        |          |         |         |          |           |
| 17                                  | 106                        | establishment of protein localization to endoplasmic reticulum      |                   |        |          |         |         |          |           |
| GO:0070972                          | 1.95134119188602e-19       | 35.3094059405941                                                    | 0.694069614559546 |        |          |         |         |          |           |
| 17                                  | 118                        | protein localization to endoplasmic reticulum                       |                   |        |          |         |         |          |           |
| GO:0006413                          | 5.87161916046592e-19       | 28.5337491646246                                                    | 0.894055774686873 |        |          |         |         |          |           |
| 18                                  | 152                        | translational initiation                                            |                   |        |          |         |         |          |           |
| GO:0000956                          | 4.09461599280805e-18       | 25.2910941978847                                                    | 0.994048854750536 |        |          |         |         |          |           |
| 18                                  | 169                        | nuclear-transcribed mRNA catabolic process                          |                   |        |          |         |         |          |           |
| GO:0006402                          | 1.05140400979372e-17       | 23.8533582089552                                                    | 1.04698636772542  |        |          |         |         |          |           |
| 18                                  | 178                        | mRNA catabolic process                                              |                   |        |          |         |         |          |           |
| GO:0019080                          | 1.46579017978226e-17       | 26.5522388059701                                                    | 0.888173828800775 |        |          |         |         |          |           |
| 17                                  | 151                        | viral genome expression                                             |                   |        |          |         |         |          |           |
| GO:0019083                          | 1.46579017978226e-17       | 26.5522388059701                                                    | 0.888173828800775 |        |          |         |         |          |           |
| 17                                  | 151                        | viral transcription                                                 |                   |        |          |         |         |          |           |
| GO:0006612                          | 1.84006815045489e-17       | 26.1580882352941                                                    | 0.899937720572971 |        |          |         |         |          |           |
| 17                                  | 153                        | protein targeting to membrane                                       |                   |        |          |         |         |          |           |
| GO:0043624                          | 1.84006815045489e-17       | 26.1580882352941                                                    | 0.899937720572971 |        |          |         |         |          |           |
| 17                                  | 153                        | cellular protein complex disassembly                                |                   |        |          |         |         |          |           |
| GO:0043241                          | 3.20371381281421e-17       | 25.2216312056738                                                    | 0.92934745000346  |        |          |         |         |          |           |
| 17                                  | 158                        | protein complex disassembly                                         |                   |        |          |         |         |          |           |
| GO:0072594                          | 1.22472715482202e-16       | 20.4814636494945                                                    | 1.19991696076396  |        |          |         |         |          |           |

Stable4\_20PerPair

|                                     |         |                                                                     |                  |                   |         |                   |           |       |                    |
|-------------------------------------|---------|---------------------------------------------------------------------|------------------|-------------------|---------|-------------------|-----------|-------|--------------------|
| 18                                  | 204     | establishment of protein localization to organelle                  |                  |                   |         |                   |           |       |                    |
| GO:0006401                          |         | 1.3366520779621e-16                                                 | 20.3705004389816 |                   |         |                   |           |       | 1.20579890665006   |
| 18                                  | 205     | RNA catabolic process                                               |                  |                   |         |                   |           |       |                    |
| GO:0034623                          |         | 1.67278171419204e-16                                                | 22.625796178344  | 1.02345858418103  |         |                   |           |       | 17                 |
| 174                                 |         | cellular macromolecular complex disassembly                         |                  |                   |         |                   |           |       |                    |
| GO:0032984                          |         | 2.70993198091825e-16                                                | 21.9197530864198 |                   |         |                   |           |       | 1.05286831361151   |
| 17                                  | 179     | macromolecular complex disassembly                                  |                  |                   |         |                   |           |       |                    |
| GO:0019058                          |         | 1.11617743754793e-15                                                | 17.8511667017028 |                   |         |                   |           |       | 1.3587294996886 18 |
| 231                                 |         | viral infectious cycle                                              |                  |                   |         |                   |           |       |                    |
| GO:0022415                          |         | 8.90746454878533e-15                                                | 15.6797829036635 |                   |         |                   |           |       | 1.52930593038544   |
| 18                                  | 260     | viral reproductive process                                          |                  |                   |         |                   |           |       |                    |
| GO:0006605                          |         | 2.57460605906515e-14                                                | 10.7496839443742 |                   |         |                   |           |       | 2.78804235001038   |
| 22                                  | 474     | protein targeting                                                   |                  |                   |         |                   |           |       |                    |
| GO:0071845                          |         | 5.80436860630791e-13                                                | 13.2013108614232 |                   |         |                   |           |       | 1.67047263165179   |
| 17                                  | 284     | cellular component disassembly at cellular level                    |                  |                   |         |                   |           |       |                    |
| GO:0022411                          |         | 7.28058789392234e-13                                                | 13.0027675276753 |                   |         |                   |           |       | 1.69400041519618   |
| 17                                  | 288     | cellular component disassembly                                      |                  |                   |         |                   |           |       |                    |
| GO:0033365                          |         | 2.6233042470814e-12                                                 | 9.45016131771099 |                   |         |                   |           |       | 2.78216040412428   |
| 20                                  | 473     | protein localization to organelle                                   |                  |                   |         |                   |           |       |                    |
| GO:0016032                          |         | 1.07578100071674e-11                                                | 9.28542368125702 |                   |         |                   |           |       | 2.65275759463013   |
| 19                                  | 451     | viral reproduction                                                  |                  |                   |         |                   |           |       |                    |
| Tissue: Artery_Tibial=>Nerve_Tibial |         | Type:                                                               | asymmetric       |                   |         |                   |           |       |                    |
| SourceGene:                         |         | LAMC3(ENSG00000050555.11)                                           |                  |                   |         |                   |           |       |                    |
| TargetGeneSet:                      |         | THBS3                                                               | BZW1             | RPL37A            | C3orf39 | SEC61A1           | EEF1A1P19 | RPS23 |                    |
| HLA-DOA                             | RPS10   | FOXP4                                                               | EEF1A1           | AHCYL2            | MTFR1   | EEF1D             | RPS6      | RPL12 | LRP10 FAU          |
| TM7SF3                              | RPS3AP6 | OSTBETA                                                             | UBA52            | RPS16             | NUMBL   | RPS9              | RPS21     | CTA   | SLC16A2            |
| RPL10                               |         |                                                                     |                  |                   |         |                   |           |       |                    |
| GOBPID                              | Pvalue  | OddsRatio                                                           | ExpCount         | Count             | Size    | Term              |           |       |                    |
| GO:0006414                          |         | 1.70532207841082e-22                                                | 184.145256916996 |                   |         | 0.17438239568196  |           |       |                    |
| 13                                  | 105     | translational elongation                                            |                  |                   |         |                   |           |       |                    |
| GO:0045047                          |         | 3.21172747861733e-20                                                | 152.478723404255 |                   |         | 0.17604318040274  |           |       |                    |
| 12                                  | 106     | protein targeting to ER                                             |                  |                   |         |                   |           |       |                    |
| GO:0072599                          |         | 3.21172747861733e-20                                                | 152.478723404255 |                   |         | 0.17604318040274  |           |       |                    |
| 12                                  | 106     | establishment of protein localization to endoplasmic reticulum      |                  |                   |         |                   |           |       |                    |
| GO:0070972                          |         | 1.23360123967505e-19                                                | 135.103773584906 |                   |         | 0.195972597052107 |           |       |                    |
| 12                                  | 118     | protein localization to endoplasmic reticulum                       |                  |                   |         |                   |           |       |                    |
| GO:0006415                          |         | 7.71872065757033e-19                                                | 151.747115384615 |                   |         | 0.151131409591032 |           |       |                    |
| 11                                  | 91      | translational termination                                           |                  |                   |         |                   |           |       |                    |
| GO:0006614                          |         | 4.01661343482609e-18                                                | 129.020458265139 |                   |         | 0.17438239568196  |           |       |                    |
| 11                                  | 105     | SRP-dependent cotranslational protein targeting to membrane         |                  |                   |         |                   |           |       |                    |
| GO:0006613                          |         | 4.47797614809388e-18                                                | 127.653441295547 |                   |         | 0.17604318040274  |           |       |                    |
| 11                                  | 106     | cotranslational protein targeting to membrane                       |                  |                   |         |                   |           |       |                    |
| GO:0000184                          |         | 1.68002490885081e-17                                                | 112.185897435897 |                   |         | 0.197633381772888 |           |       |                    |
| 11                                  | 119     | nuclear-transcribed mRNA catabolic process, nonsense-mediated decay |                  |                   |         |                   |           |       |                    |
| GO:0072594                          |         | 1.05491597867372e-16                                                | 74.140625        | 0.338800083039236 |         | 12                |           |       |                    |
| 204                                 |         | establishment of protein localization to organelle                  |                  |                   |         |                   |           |       |                    |
| GO:0019080                          |         | 2.49118165200418e-16                                                | 86.35            | 0.250778492837866 |         | 11                | 151       |       |                    |
| viral genome expression             |         |                                                                     |                  |                   |         |                   |           |       |                    |
| GO:0019083                          |         | 2.49118165200418e-16                                                | 86.35            | 0.250778492837866 |         | 11                | 151       |       |                    |
| viral transcription                 |         |                                                                     |                  |                   |         |                   |           |       |                    |
| GO:0006413                          |         | 2.68329475132038e-16                                                | 85.7315875613748 |                   |         | 0.252439277558646 |           |       |                    |
| 11                                  | 152     | translational initiation                                            |                  |                   |         |                   |           |       |                    |
| GO:0006612                          |         | 2.88874998161738e-16                                                | 85.1218851570964 |                   |         | 0.254100062279427 |           |       |                    |
| 11                                  | 153     | protein targeting to membrane                                       |                  |                   |         |                   |           |       |                    |
| GO:0043624                          |         | 2.88874998161738e-16                                                | 85.1218851570964 |                   |         | 0.254100062279427 |           |       |                    |
| 11                                  | 153     | cellular protein complex disassembly                                |                  |                   |         |                   |           |       |                    |
| GO:0043241                          |         | 4.14666655261344e-16                                                | 82.1978021978022 |                   |         | 0.26240398588333  |           |       |                    |
| 11                                  | 158     | protein complex disassembly                                         |                  |                   |         |                   |           |       |                    |
| GO:0000956                          |         | 8.82122496932847e-16                                                | 76.4162609542356 |                   |         | 0.280672617811916 |           |       |                    |
| 11                                  | 169     | nuclear-transcribed mRNA catabolic process                          |                  |                   |         |                   |           |       |                    |
| GO:0034623                          |         | 1.22248223566935e-15                                                | 74.0462482302973 |                   |         | 0.288976541415819 |           |       |                    |
| 11                                  | 174     | cellular macromolecular complex disassembly                         |                  |                   |         |                   |           |       |                    |
| GO:0006402                          |         | 1.57610865522108e-15                                                | 72.2524182404422 |                   |         | 0.295619680298941 |           |       |                    |

STable4\_20PerPair

|                                        |          |                                                                |                  |                   |           |                    |           |                 |
|----------------------------------------|----------|----------------------------------------------------------------|------------------|-------------------|-----------|--------------------|-----------|-----------------|
| 11                                     | 178      | mRNA catabolic process                                         |                  |                   |           |                    |           |                 |
| GO:0032984                             |          | 1.67790682697873e-15                                           | 71.8173076923077 |                   |           | 0.297280465019722  |           |                 |
| 11                                     | 179      | macromolecular complex disassembly                             |                  |                   |           |                    |           |                 |
| GO:0006401                             |          | 7.60023279136492e-15                                           | 62.078905630452  | 0.340460867760017 |           |                    |           | 11              |
| 205                                    |          | RNA catabolic process                                          |                  |                   |           |                    |           |                 |
| GO:0019058                             |          | 2.85353956380093e-14                                           | 54.6423076923077 |                   |           | 0.383641270500311  |           |                 |
| 11                                     | 231      | viral infectious cycle                                         |                  |                   |           |                    |           |                 |
| GO:0022415                             |          | 1.05121680674353e-13                                           | 48.179796107507  | 0.431804027402948 |           |                    |           | 11              |
| 260                                    |          | viral reproductive process                                     |                  |                   |           |                    |           |                 |
| GO:0071845                             |          | 2.77153128770952e-13                                           | 43.8698224852071 |                   |           | 0.471662860701682  |           |                 |
| 11                                     | 284      | cellular component disassembly at cellular level               |                  |                   |           |                    |           |                 |
| GO:0022411                             |          | 3.23054316537605e-13                                           | 43.2241044154402 |                   |           | 0.478305999584804  |           |                 |
| 11                                     | 288      | cellular component disassembly                                 |                  |                   |           |                    |           |                 |
| GO:0033365                             |          | 2.49276638795817e-12                                           | 30.295010845987  | 0.785551172929209 |           |                    |           | 12              |
| 473                                    |          | protein localization to organelle                              |                  |                   |           |                    |           |                 |
| GO:0006605                             |          | 2.55549620889547e-12                                           | 30.2272727272727 |                   |           | 0.78721195764999   |           |                 |
| 12                                     | 474      | protein targeting                                              |                  |                   |           |                    |           |                 |
| GO:0016032                             |          | 4.19569745135523e-11                                           | 26.8980769230769 |                   |           | 0.749013909072037  |           |                 |
| 11                                     | 451      | viral reproduction                                             |                  |                   |           |                    |           |                 |
| GO:0042274                             |          | 3.23105168313163e-06                                           | 137.257142857143 |                   |           | 0.0298941249740502 |           |                 |
| 3                                      | 18       | ribosomal small subunit biogenesis                             |                  |                   |           |                    |           |                 |
| Tissue: Artery_Tibial=>Nerve_Tibial    |          | Type: asymmetric                                               |                  |                   |           |                    |           |                 |
| SourceGene: NGFRAP1(ENSG00000166681.9) |          |                                                                |                  |                   |           |                    |           |                 |
| TargetGeneSet:                         |          | ZCCHC17                                                        | PSMB2            | NDUFS5            | UQCRH     | ST6GALNAC5         | ALG14     | CAPZA1          |
| MRPS21                                 | TMC01    | RP4                                                            | PFN1P1           | SNRPE             | LINC00467 | RP11               | TARBP1    | PTRHD1 OST4     |
| MRPL33                                 | MORN2    | MDH1                                                           | NFU1             | TPRKB             | TMSB10    | NDUFB3             | BRK1      | UBE2E1 CCDC72   |
| VPRBP                                  | SPCS1    | NEK4                                                           | MRPL47           | NDUFB5            | ATP5I     | STX18              | EVC2      | MAN2B2 OCIAD1   |
| NDUFC1                                 | MGST2    | FSTL5                                                          | NEIL3            | SUB1              | CTD       | UQCRQ              | PHF15     | PDF DIAPH1      |
| TCOF1                                  | ATOX1    | PTTG1                                                          | AIF1             | C6orf48           | KIFC1     | COX6A1P2           | FOXP4     | KIAA0240        |
| RPL39P3                                | COX7A2   | HMGN3                                                          | PRSS35           | PEX7              | NUDT1     | NDUFA4             | TOMM7     | MALSU1 LSM5     |
| SEC61G                                 | TP53TG1  | ECD                                                            | PMS2P1           | AP1S1             | GSTK1     | MRPL15             | PENK      | C8orf59 DECR1   |
| UQCRB                                  | COX6C    | MRPL13                                                         | C9orf123         |                   | SEC61B    | TXN                | ATP5C1    | TAF3 POLR2L     |
| NUP98                                  | IMMP1L   | SLC43A3                                                        | C11orf10         |                   | SNX15     | RELA               | ARAP1-AS1 | CLNS1A          |
| ATP5L                                  | ZC3H10   | C12orf45                                                       |                  | GCN1L1            | CCDC92    | POMP               | COMMD6    | ACIN1 RPS29 ERH |
| RP3                                    | EFCAB11  | NDUFB1                                                         | IFI27L1          | C14orf2           | HMGN2P5   | SRP14              | GTF2A2    | COX5A WASH3P    |
| NDUFAB1                                | NSMCE1   | MIR4519                                                        | PSMB10           | TRAPPC1           | ATP5H     | H3F3B              | SEC11C    | UQCR11 C19orf70 |
| C19orf79                               |          | MAP2K7                                                         | PIN1             | RAVER1            | ZNF653    | ZNF625             | ZNF726    | ANKRD27 COX6B1  |
| POLR2I                                 | MIA      | CCDC97                                                         | SNRPD2           | SLC17A7           | TBC1D17   | NDUFA3             | C20orf7   | SNRPB2 ROMO1    |
| PFDN4                                  | ATP5J    | SNRPD3                                                         | UQCR10           | LGALS1            | CBX7      | RP6                | EEF1B2P3  | NDUFB11         |
| TIMP1                                  | PRICKLE3 |                                                                | PDZD11           | BCORL1            | SSR4      | DKC1               |           |                 |
| GOBPID                                 | Pvalue   | OddsRatio                                                      | ExpCount         | Count             | Size      | Term               |           |                 |
| GO:0022904                             |          | 3.60072593790556e-26                                           | 43.2506894649752 |                   |           | 0.797176665974673  |           |                 |
| 22                                     | 96       | respiratory electron transport chain                           |                  |                   |           |                    |           |                 |
| GO:0022900                             |          | 3.16534702822751e-24                                           | 30.3761493452215 |                   |           | 1.11272576292298   |           |                 |
| 23                                     | 134      | electron transport chain                                       |                  |                   |           |                    |           |                 |
| GO:0045333                             |          | 1.28520448731778e-23                                           | 28.3181148748159 |                   |           | 1.1791571517542    |           | 23              |
| 142                                    |          | cellular respiration                                           |                  |                   |           |                    |           |                 |
| GO:0015980                             |          | 3.892942073092e-18                                             | 13.1103023516237 |                   |           | 2.54930454639817   |           |                 |
| 25                                     | 307      | energy derivation by oxidation of organic compounds            |                  |                   |           |                    |           |                 |
| GO:0006091                             |          | 1.01142087492698e-15                                           | 9.58383613845665 |                   |           | 3.55407930247042   |           |                 |
| 26                                     | 428      | generation of precursor metabolites and energy                 |                  |                   |           |                    |           |                 |
| GO:0006119                             |          | 3.96541852571518e-14                                           | 34.5048309178744 |                   |           | 0.481627569026365  |           |                 |
| 12                                     | 58       | oxidative phosphorylation                                      |                  |                   |           |                    |           |                 |
| GO:0042773                             |          | 1.09909586770632e-13                                           | 40.072629969419  | 0.390284409383434 |           |                    |           | 11              |
| 47                                     |          | ATP synthesis coupled electron transport                       |                  |                   |           |                    |           |                 |
| GO:0042775                             |          | 1.09909586770632e-13                                           | 40.072629969419  | 0.390284409383434 |           |                    |           | 11              |
| 47                                     |          | mitochondrial ATP synthesis coupled electron transport         |                  |                   |           |                    |           |                 |
| GO:0006120                             |          | 4.45026373362782e-10                                           | 36.4872448979592 |                   |           | 0.298941249740502  |           |                 |
| 8                                      | 36       | mitochondrial electron transport, NADH to ubiquinone           |                  |                   |           |                    |           |                 |
| GO:0042776                             |          | 4.43127881906548e-08                                           | 77.8423913043478 |                   |           | 0.107951006850737  |           |                 |
| 5                                      | 13       | mitochondrial ATP synthesis coupled proton transport           |                  |                   |           |                    |           |                 |
| GO:0015985                             |          | 2.85361870179688e-07                                           | 47.8862876254181 |                   |           | 0.149470624870251  |           |                 |
| 5                                      | 18       | energy coupled proton transport, down electrochemical gradient |                  |                   |           |                    |           |                 |

Stable4\_20PerPair

|                                                   |                      |                                                             |                                          |
|---------------------------------------------------|----------------------|-------------------------------------------------------------|------------------------------------------|
| GO:0015986                                        | 2.85361870179688e-07 | 47.8862876254181                                            | 0.149470624870251                        |
| 5                                                 | 18                   | ATP synthesis coupled proton transport                      |                                          |
| GO:0006122                                        | 2.22034742164306e-06 | 367.435897435897                                            | 0.0332156944156114                       |
| 3                                                 | 4                    | mitochondrial electron transport, ubiquinol to cytochrome c |                                          |
| GO:0006200                                        | 2.84068659625795e-06 | 12.9933628318584                                            | 0.622794270292713                        |
| 7                                                 | 75                   | ATP catabolic process                                       |                                          |
| GO:0000387                                        | 5.19105516446692e-06 | 23.9214046822742                                            | 0.257421631720988                        |
| 5                                                 | 31                   | spliceosomal snRNP assembly                                 |                                          |
| Tissue: Nerve_Tibial=>Artery_Tibial Type: cluster |                      |                                                             |                                          |
| SourceGene: NUP98(ENSG00000110713.11)             |                      |                                                             |                                          |
| TargetGeneSet:                                    | CDK11A               | PARK7                                                       | UBR4                                     |
| UQCRH                                             | ATPAF1               | SCP2                                                        | RP4                                      |
| HBXIP                                             | RP11                 | ATP5F1                                                      | SIKE1                                    |
| MGST3                                             | CREG1                | BRP44                                                       | DNM3OS                                   |
| CGREF1                                            | MPV17                | RBKS                                                        | USP34                                    |
| TXNDC9                                            | CCDC74A              | PSMD14                                                      | H3F3AP4                                  |
| SEN2                                              | MYEOV2               | BRK1                                                        | LSM3                                     |
| SPCS1                                             | ACOX2                | TFG                                                         | ABHD10                                   |
| LRR34                                             | MRPL47               | NDUFB5                                                      | DNAJC19                                  |
| MRPL1                                             | MRPS18C              | SLC10A6                                                     | LAMTOR3                                  |
| PET112                                            | SCRG1                | FBXO8                                                       | C5orf55                                  |
| CETN3                                             | COMMD10              | UQCRQ                                                       | LEAP2                                    |
| ATOX1                                             | UBLCP1               | NUDCD2                                                      | HMMR                                     |
| HMG4                                              | BAG6                 | HNRNPC                                                      | BRPF3                                    |
| IRAK1BP1                                          |                      | HMG3                                                        | CYB5R4                                   |
| SF3B5                                             | RPA3                 | NDUFA4                                                      | RPS2P32                                  |
| SKP1P1                                            | STAG3L4              | TRIM74                                                      | UPK3B                                    |
| NDUFA5                                            | C7orf73              | NDUFB2                                                      | MRPS33                                   |
| KIF13B                                            | DCTN6                | LSM1                                                        | ATP6V1H                                  |
| MRPS35                                            | DECR1                | HRSP12                                                      | COX6C                                    |
| DCTN3                                             | CCL19                | GBA2                                                        | SHC3                                     |
| RALGDS                                            | LINC00094            |                                                             | NOTCH1                                   |
| PARD3                                             | MRPS16               | GHITM                                                       | ZRANB1                                   |
| C11orf74                                          |                      | ETFA                                                        | FNBP4                                    |
| MRPL11                                            | NDUFS8               | MYEOV                                                       | PPFIA1                                   |
| C11orf70                                          |                      | DCUN1D5                                                     | SIK3                                     |
| ALG1L2                                            | MAGOHB               | CCDC91                                                      | COX14                                    |
| TMT3                                              | UBE2N                | MRPL42                                                      | CCDC53                                   |
| TRAC                                              | RAN                  | MPHOSPH8                                                    |                                          |
| COMMD6                                            | A2LD1                | C14orf126                                                   |                                          |
| ATP6V1D                                           | BCRP2                | SLIRP                                                       | TTC8                                     |
| SERF2                                             | DYX1C1               | CPCP1                                                       | GTF2A2                                   |
| C15orf40                                          |                      | MRPS11                                                      | MAN2A2                                   |
| CNOT1                                             | FAM65A               | SLC12A4                                                     | DHX38                                    |
| MLLT6                                             | STARD3               | CASC3                                                       | STAT5A                                   |
| ATP5H                                             | ANAPC11              | IER3IP1                                                     | C18orf32                                 |
| C19orf70                                          |                      | NDUFA11                                                     | PIN1                                     |
| EPS15L1                                           | NDUFA13              | RPSAP58                                                     | POP4                                     |
| TMEM230                                           | SNRPB2               | COMMD7                                                      | MAPRE1                                   |
| ERVH48-1                                          |                      | CSTB                                                        | MCM3AP                                   |
| EIF4ENIF1                                         |                      | RP1                                                         | TXN2                                     |
| ATP6AP2                                           | FUNDC1               | OTUD5                                                       | PHF8                                     |
| NAP1L3                                            | TCEAL8               | NGFRAP1                                                     | RPL39                                    |
| MECP2                                             | FUNDC2               | VAMP7                                                       |                                          |
| GOBPID                                            | Pvalue               | OddsRatio                                                   | ExpCount                                 |
| GO:0022904                                        | 32                   | 96                                                          | 4.81829348728712e-29                     |
| GO:0045333                                        | 34                   | 142                                                         | 1.95904953081311e-25                     |
| GO:0022900                                        | 33                   | 134                                                         | 3.86376520601551e-25                     |
| GO:0042773                                        | 16                   | 47                                                          | 2.87665841927614e-15                     |
|                                                   |                      |                                                             | 23.6666666666667                         |
|                                                   |                      |                                                             | 14.9553044569994                         |
|                                                   |                      |                                                             | 15.4767527428419                         |
|                                                   |                      |                                                             | 23.2357002988766                         |
|                                                   |                      |                                                             | Count                                    |
|                                                   |                      |                                                             | Size                                     |
|                                                   |                      |                                                             | Term                                     |
|                                                   |                      |                                                             | 2.18559269254723                         |
|                                                   |                      |                                                             | 3.23285585772611                         |
|                                                   |                      |                                                             | 3.05072313334717                         |
|                                                   |                      |                                                             | 1.07002975572625                         |
|                                                   |                      |                                                             | respiratory electron transport chain     |
|                                                   |                      |                                                             | cellular respiration                     |
|                                                   |                      |                                                             | electron transport chain                 |
|                                                   |                      |                                                             | ATP synthesis coupled electron transport |



Stable4\_20PerPair

|                                                      |                      |                                                                     |                   |
|------------------------------------------------------|----------------------|---------------------------------------------------------------------|-------------------|
| GO:0042775                                           | 2.87665841927614e-15 | 23.2357002988766                                                    | 1.07002975572625  |
| 16                                                   | 47                   | mitochondrial ATP synthesis coupled electron transport              |                   |
| GO:0015980                                           | 3.07145615883108e-15 | 6.06179971988796                                                    | 6.98934329804166  |
| 35                                                   | 307                  | energy derivation by oxidation of organic compounds                 |                   |
| GO:0006119                                           | 6.66748543546713e-15 | 18.713023764853                                                     | 1.32046225174728  |
| 58                                                   |                      | oxidative phosphorylation                                           | 17                |
| GO:0006120                                           | 1.84479784875503e-14 | 28.4848484848485                                                    | 0.819597259705211 |
| 14                                                   | 36                   | mitochondrial electron transport, NADH to ubiquinone                |                   |
| GO:0006091                                           | 2.74007973506067e-12 | 4.44983883964545                                                    | 9.74410075427306  |
| 37                                                   | 428                  | generation of precursor metabolites and energy                      |                   |
| GO:0015985                                           | 7.63100566924428e-08 | 27.8873517786561                                                    | 0.409798629852605 |
| 7                                                    | 18                   | energy coupled proton transport, down electrochemical gradient      |                   |
| GO:0015986                                           | 7.63100566924428e-08 | 27.8873517786561                                                    | 0.409798629852605 |
| 7                                                    | 18                   | ATP synthesis coupled proton transport                              |                   |
| GO:0042776                                           | 1.99560289510032e-07 | 37.4568774878372                                                    | 0.295965677115771 |
| 6                                                    | 13                   | mitochondrial ATP synthesis coupled proton transport                |                   |
| GO:0015992                                           | 2.22247353014058e-06 | 7.87393640841917                                                    | 1.50259497612622  |
| 10                                                   | 66                   | proton transport                                                    |                   |
| GO:0006818                                           | 2.94185482576975e-06 | 7.6013403956329                                                     | 1.54812815722095  |
| 68                                                   |                      | hydrogen transport                                                  | 10                |
| Tissue: Nerve_Tibial=>Artery_Tibial Type: asymmetric |                      |                                                                     |                   |
| SourceGene: PIK3IP1(ENSG00000100100.7)               |                      |                                                                     |                   |
| TargetGeneSet:                                       | HMG2                 | RPS8                                                                | CCDC17            |
| NCOA1                                                | EIF3FP3              | SATB2                                                               | RPL15             |
| PCOLCE2                                              | EIF4G1               | GPR125                                                              | LIAS              |
| RPS10                                                | RPL10A               | SNHG5                                                               | BEND3             |
| DCTN3                                                | VPS13A               | RPL35                                                               | RPL12             |
| CHPT1                                                | RPL18AP3             |                                                                     | EID3              |
| RPL13                                                | KIF1C                | KIAA0100                                                            | RPL19             |
| RPS15                                                | PRKCSH               | CTD                                                                 | RPL18A            |
| RPL12P4                                              | PPDPF                | EIF3FP1                                                             | MICALL1           |
| GOBPID                                               | Pvalue               | OddsRatio                                                           | ExpCount          |
| GO:0006614                                           | 4.11941428480046e-45 | 157.719008264463                                                    | 0.443221922358314 |
| 28                                                   | 105                  | SRP-dependent cotranslational protein targeting to membrane         |                   |
| GO:0006613                                           | 5.58574977734701e-45 | 155.686091686092                                                    | 0.447443083523632 |
| 28                                                   | 106                  | cotranslational protein targeting to membrane                       |                   |
| GO:0045047                                           | 5.58574977734701e-45 | 155.686091686092                                                    | 0.447443083523632 |
| 28                                                   | 106                  | protein targeting to ER                                             |                   |
| GO:0072599                                           | 5.58574977734701e-45 | 155.686091686092                                                    | 0.447443083523632 |
| 28                                                   | 106                  | establishment of protein localization to endoplasmic reticulum      |                   |
| GO:0006415                                           | 7.17549268866088e-45 | 177.758272058824                                                    | 0.384125666043872 |
| 27                                                   | 91                   | translational termination                                           |                   |
| GO:0070972                                           | 1.69411579208698e-43 | 134.814814814815                                                    | 0.498097017507439 |
| 28                                                   | 118                  | protein localization to endoplasmic reticulum                       |                   |
| GO:0000184                                           | 2.21045964572133e-43 | 133.324009324009                                                    | 0.502318178672756 |
| 28                                                   | 119                  | nuclear-transcribed mRNA catabolic process, nonsense-mediated decay |                   |
| GO:0006414                                           | 6.22826737110555e-43 | 145.710407239819                                                    | 0.443221922358314 |
| 27                                                   | 105                  | translational elongation                                            |                   |
| GO:0006413                                           | 4.33690436240561e-40 | 97.6168132942326                                                    | 0.641616497128226 |
| 28                                                   | 152                  | translational initiation                                            |                   |
| GO:0006612                                           | 5.29654982714096e-40 | 96.8290909090909                                                    | 0.645837658293544 |
| 28                                                   | 153                  | protein targeting to membrane                                       |                   |
| GO:0000956                                           | 1.07861822522739e-38 | 85.7451106812809                                                    | 0.71337623693862  |
| 28                                                   | 169                  | nuclear-transcribed mRNA catabolic process                          |                   |
| GO:0019080                                           | 3.36234410657138e-38 | 91.361954459203                                                     | 0.637395335962909 |
| 151                                                  |                      | viral genome expression                                             | 27                |
| GO:0019083                                           | 3.36234410657138e-38 | 91.361954459203                                                     | 0.637395335962909 |
| 151                                                  |                      | viral transcription                                                 | 27                |
| GO:0043624                                           | 4.94201641057437e-38 | 89.8991596638655                                                    | 0.645837658293544 |
| 27                                                   | 153                  | cellular protein complex disassembly                                |                   |
| GO:0006402                                           | 5.12968344097234e-38 | 80.549494949495                                                     | 0.751366687426476 |
| 178                                                  |                      | mRNA catabolic process                                              | 28                |
| GO:0043241                                           | 1.26368164806305e-37 | 86.4375841939829                                                    | 0.66694346412013  |

Stable4\_20PerPair

|                                                      |         |                                                                     |                  |           |                   |                   |         |          |          |      |
|------------------------------------------------------|---------|---------------------------------------------------------------------|------------------|-----------|-------------------|-------------------|---------|----------|----------|------|
| 27                                                   | 158     | protein complex disassembly                                         |                  |           |                   |                   |         |          |          |      |
| GO:0034623                                           |         | 2.07136599701717e-36                                                | 76.9429771908763 |           | 0.734482042765207 |                   |         |          |          |      |
| 27                                                   | 174     | cellular macromolecular complex disassembly                         |                  |           |                   |                   |         |          |          |      |
| GO:0072594                                           |         | 2.97174463481531e-36                                                | 68.5247933884298 |           | 0.861116877724725 |                   |         |          |          |      |
| 28                                                   | 204     | establishment of protein localization to organelle                  |                  |           |                   |                   |         |          |          |      |
| GO:0006401                                           |         | 3.43416062535662e-36                                                | 68.1328539633624 |           | 0.865338038890042 |                   |         |          |          |      |
| 28                                                   | 205     | RNA catabolic process                                               |                  |           |                   |                   |         |          |          |      |
| GO:0032984                                           |         | 4.68495160608245e-36                                                | 74.3858359133127 |           | 0.755587848591793 |                   |         |          |          |      |
| 27                                                   | 179     | macromolecular complex disassembly                                  |                  |           |                   |                   |         |          |          |      |
| GO:0019058                                           |         | 6.60041849918665e-33                                                | 55.2223183391003 |           | 0.975088229188292 |                   |         |          |          |      |
| 27                                                   | 231     | viral infectious cycle                                              |                  |           |                   |                   |         |          |          |      |
| GO:0022415                                           |         | 1.80574338752716e-31                                                | 48.2503155768745 |           | 1.09750190298249  |                   |         |          |          |      |
| 27                                                   | 260     | viral reproductive process                                          |                  |           |                   |                   |         |          |          |      |
| GO:0071845                                           |         | 2.09364027324473e-30                                                | 43.6702906843671 |           | 1.19880977095011  |                   |         |          |          |      |
| 27                                                   | 284     | cellular component disassembly at cellular level                    |                  |           |                   |                   |         |          |          |      |
| GO:0022411                                           |         | 3.08201273765649e-30                                                | 42.9888438133874 |           | 1.21569441561138  |                   |         |          |          |      |
| 27                                                   | 288     | cellular component disassembly                                      |                  |           |                   |                   |         |          |          |      |
| GO:0033365                                           |         | 3.05041458481956e-27                                                | 28.4652308558559 |           | 1.99660923119507  |                   |         |          |          |      |
| 29                                                   | 473     | protein localization to organelle                                   |                  |           |                   |                   |         |          |          |      |
| GO:0006605                                           |         | 3.2420308424832e-27                                                 | 28.3992275280899 |           | 2.00083039236039  |                   |         |          |          |      |
| 29                                                   | 474     | protein targeting                                                   |                  |           |                   |                   |         |          |          |      |
| GO:0016032                                           |         | 6.09273795948175e-25                                                | 26.1571864594895 |           | 1.90374368555809  |                   |         |          |          |      |
| 27                                                   | 451     | viral reproduction                                                  |                  |           |                   |                   |         |          |          |      |
| GO:0022613                                           |         | 4.41542322260067e-06                                                | 9.85862098947918 |           | 0.949761262196388 |                   |         |          |          |      |
| 8                                                    | 225     | ribonucleoprotein complex biogenesis                                |                  |           |                   |                   |         |          |          |      |
| GO:0071843                                           |         | 6.88629834733271e-06                                                | 9.25198072367884 |           | 1.00885751851083  |                   |         |          |          |      |
| 8                                                    | 239     | cellular component biogenesis at cellular level                     |                  |           |                   |                   |         |          |          |      |
| Tissue: Nerve_Tibial=>Artery_Tibial Type: asymmetric |         |                                                                     |                  |           |                   |                   |         |          |          |      |
| SourceGene: PLXNA2(ENSG00000076356.6)                |         |                                                                     |                  |           |                   |                   |         |          |          |      |
| TargetGeneSet:                                       | RPL22   | RP11                                                                | RHCE             | HMG2      | KHDRBS1           | RPS8              | IPP     | RP4      |          |      |
| CHI3L2                                               | ANP32E  | CREB3L4                                                             | SSR2             | TOMM20    | NCAPH             | RPL31             | FMNL2   | EEF1B2   | RPL15    |      |
| CTDSPL                                               | RPL14   | RNF123                                                              | RPL10AP6         |           | PSMC1P1           | RPL24             | PLXNA1  | PARL     | TFRC     |      |
| YTHDC1                                               | AIMP1   | METTL14                                                             | COX7C            | RIOK2     | CTD               | NPM1              | MRPS18B | RPL10A   | MRPL2    |      |
| MRPS12                                               | C7orf50 | TOMM7                                                               | EIF4H            | SSBP1     | CHCHD7            | EIF3H             | RPL8    | RPS6     | RPL35    |      |
| RPL12                                                | RPL7A   | C10orf35                                                            |                  | C10orf116 |                   | AGAP11            | CCDC147 | WDR11    | C11orf58 |      |
| RPS13                                                | PLA2G16 | U4                                                                  | RPS3             | C11orf1   | NRGN              | RPL41             | RPL14P1 | RPL18AP3 | TCHP     |      |
| DIABLO                                               | IFT88   | SAP18                                                               | DIAPH3-AS1       |           | RPL7AP6           | SLC30A4           | RSL24D1 | RPLP1    | PEAK1    | RPS2 |
| NUDT21                                               | RPL13   | ALDOC                                                               | RPL23A           | ACACA     | RPL17             | RPL19             | SMARCE1 | ZNF385C  | HEXIM2   |      |
| PTPRM                                                | PPP4R1  | RPL36                                                               | DNMT1            | RPS16     | RPL18             | RPL28             | RPS5    | SNPH     | DTD1     |      |
| CHMP4B                                               | DHX35   | RPS21                                                               | PPDPF            | GRIK1     | PIGP              | USP51             | BEX4    | RPL10    |          |      |
| GOBPID                                               | Pvalue  | OddsRatio                                                           | ExpCount         | Count     | Size              | Term              |         |          |          |      |
| GO:0006415                                           |         | 6.1703430167461e-42                                                 | 109.593869731801 |           |                   | 0.541554217701197 |         |          |          |      |
| 28                                                   | 91      | translational termination                                           |                  |           |                   |                   |         |          |          |      |
| GO:0006414                                           |         | 6.87236085561065e-42                                                | 95.6558171745152 |           |                   | 0.624870251193689 |         |          |          |      |
| 29                                                   | 105     | translational elongation                                            |                  |           |                   |                   |         |          |          |      |
| GO:0006614                                           |         | 6.87236085561065e-42                                                | 95.6558171745152 |           |                   | 0.624870251193689 |         |          |          |      |
| 29                                                   | 105     | SRP-dependent cotranslational protein targeting to membrane         |                  |           |                   |                   |         |          |          |      |
| GO:0006613                                           |         | 9.42433443774958e-42                                                | 94.4069264069264 |           |                   | 0.630821396443153 |         |          |          |      |
| 29                                                   | 106     | cotranslational protein targeting to membrane                       |                  |           |                   |                   |         |          |          |      |
| GO:0045047                                           |         | 9.42433443774958e-42                                                | 94.4069264069264 |           |                   | 0.630821396443153 |         |          |          |      |
| 29                                                   | 106     | protein targeting to ER                                             |                  |           |                   |                   |         |          |          |      |
| GO:0072599                                           |         | 9.42433443774958e-42                                                | 94.4069264069264 |           |                   | 0.630821396443153 |         |          |          |      |
| 29                                                   | 106     | establishment of protein localization to endoplasmic reticulum      |                  |           |                   |                   |         |          |          |      |
| GO:0070972                                           |         | 3.23440990448545e-40                                                | 81.6093041592746 |           |                   | 0.702235139436717 |         |          |          |      |
| 29                                                   | 118     | protein localization to endoplasmic reticulum                       |                  |           |                   |                   |         |          |          |      |
| GO:0006413                                           |         | 1.76944804945208e-38                                                | 62.5424473067916 |           |                   | 0.904574077918483 |         |          |          |      |
| 30                                                   | 152     | translational initiation                                            |                  |           |                   |                   |         |          |          |      |
| GO:0000184                                           |         | 3.344037340499e-38                                                  | 75.7241379310345 |           |                   | 0.708186284686181 |         |          |          |      |
| 28                                                   | 119     | nuclear-transcribed mRNA catabolic process, nonsense-mediated decay |                  |           |                   |                   |         |          |          |      |
| GO:0006612                                           |         | 1.3267439040668e-36                                                 | 58.4308149405772 |           |                   | 0.910525223167947 |         |          |          |      |
| 29                                                   | 153     | protein targeting to membrane                                       |                  |           |                   |                   |         |          |          |      |
| GO:0072594                                           |         | 4.99225871832265e-36                                                | 46.2377299001576 |           |                   | 1.2140336308906   |         |          | 31       |      |
| 204                                                  |         | establishment of protein localization to organelle                  |                  |           |                   |                   |         |          |          |      |

Stable4\_20PerPair

|                                                      |                                                  |                  |                     |          |            |          |          |          |          |          |
|------------------------------------------------------|--------------------------------------------------|------------------|---------------------|----------|------------|----------|----------|----------|----------|----------|
| GO:0019080                                           | 5.08201334118564e-35                             | 55.8979534622932 | 0.898622932669019   |          |            |          |          |          |          |          |
| 28 151                                               | viral genome expression                          |                  |                     |          |            |          |          |          |          |          |
| GO:0019083                                           | 5.08201334118564e-35                             | 55.8979534622932 | 0.898622932669019   |          |            |          |          |          |          |          |
| 28 151                                               | viral transcription                              |                  |                     |          |            |          |          |          |          |          |
| GO:0034623                                           | 7.33260248617606e-35                             | 49.8947368421053 | 1.03549927340668    |          |            |          |          |          |          |          |
| 29 174                                               | cellular macromolecular complex disassembly      |                  |                     |          |            |          |          |          |          |          |
| GO:0043624                                           | 7.56543424743669e-35                             | 54.9958620689655 | 0.910525223167947   |          |            |          |          |          |          |          |
| 28 153                                               | cellular protein complex disassembly             |                  |                     |          |            |          |          |          |          |          |
| GO:0032984                                           | 1.75977086521413e-34                             | 48.2146198830409 | 1.065254999654 29   |          |            |          |          |          |          |          |
| 179                                                  | macromolecular complex disassembly               |                  |                     |          |            |          |          |          |          |          |
| GO:0043241                                           | 1.99496508092307e-34                             | 52.8620689655172 | 0.940280949415265   |          |            |          |          |          |          |          |
| 28 158                                               | protein complex disassembly                      |                  |                     |          |            |          |          |          |          |          |
| GO:0000956                                           | 1.49951507432058e-33                             | 48.700415749572  | 1.00574354715937 28 |          |            |          |          |          |          |          |
| 169                                                  | nuclear-transcribed mRNA catabolic process       |                  |                     |          |            |          |          |          |          |          |
| GO:0006402                                           | 7.02352240549742e-33                             | 45.7494252873563 | 1.05930385440454    |          |            |          |          |          |          |          |
| 28 178                                               | mRNA catabolic process                           |                  |                     |          |            |          |          |          |          |          |
| GO:0006401                                           | 4.49166690403213e-31                             | 38.6970582505357 | 1.21998477614006    |          |            |          |          |          |          |          |
| 28 205                                               | RNA catabolic process                            |                  |                     |          |            |          |          |          |          |          |
| GO:0019058                                           | 1.44054718261466e-29                             | 33.678953626635  | 1.37471455262612 28 |          |            |          |          |          |          |          |
| 231                                                  | viral infectious cycle                           |                  |                     |          |            |          |          |          |          |          |
| GO:0071845                                           | 1.91139572050037e-28                             | 28.1520467836257 | 1.69012525084769    |          |            |          |          |          |          |          |
| 29 284                                               | cellular component disassembly at cellular level |                  |                     |          |            |          |          |          |          |          |
| GO:0022411                                           | 2.88393105145004e-28                             | 27.7094086567771 | 1.71392983184555    |          |            |          |          |          |          |          |
| 29 288                                               | cellular component disassembly                   |                  |                     |          |            |          |          |          |          |          |
| GO:0022415                                           | 4.2927540672964e-28                              | 29.4087395957194 | 1.54729776486056    |          |            |          |          |          |          |          |
| 28 260                                               | viral reproductive process                       |                  |                     |          |            |          |          |          |          |          |
| GO:0033365                                           | 8.35406024658428e-26                             | 18.7103384563702 | 2.81489170299633    |          |            |          |          |          |          |          |
| 32 473                                               | protein localization to organelle                |                  |                     |          |            |          |          |          |          |          |
| GO:0006605                                           | 8.92540399046233e-26                             | 18.6666666666667 | 2.8208428482458 32  |          |            |          |          |          |          |          |
| 474                                                  | protein targeting                                |                  |                     |          |            |          |          |          |          |          |
| GO:0016032                                           | 1.9244691752017e-21                              | 15.9116328360642 | 2.68396650750813    |          |            |          |          |          |          |          |
| 28 451                                               | viral reproduction                               |                  |                     |          |            |          |          |          |          |          |
| GO:0042254                                           | 2.84611120448856e-06                             | 10.346608474268  | 0.886720642170092 8 |          |            |          |          |          |          |          |
| 149                                                  | ribosome biogenesis                              |                  |                     |          |            |          |          |          |          |          |
| GO:0042274                                           | 3.35689577045844e-06                             | 50.0034843205575 | 0.107120614490347   |          |            |          |          |          |          |          |
| 4 18                                                 | ribosomal small subunit biogenesis               |                  |                     |          |            |          |          |          |          |          |
| GO:0022613                                           | 7.44969396446811e-06                             | 7.65638528138528 | 1.33900768112933    |          |            |          |          |          |          |          |
| 9 225                                                | ribonucleoprotein complex biogenesis             |                  |                     |          |            |          |          |          |          |          |
| GO:0071843                                           | 1.21044720135613e-05                             | 7.1832298136646  | 1.42232371462183 9  |          |            |          |          |          |          |          |
| 239                                                  | cellular component biogenesis at cellular level  |                  |                     |          |            |          |          |          |          |          |
| Tissue: Artery_Tibial=>Nerve_Tibial Type: asymmetric |                                                  |                  |                     |          |            |          |          |          |          |          |
| SourceGene: RPL35(ENSG00000136942.9)                 |                                                  |                  |                     |          |            |          |          |          |          |          |
| TargetGeneSet:                                       | RPL22                                            | MTOR             | CROCCP3             | PHACTR4  | ZMYND12    | RNU5E-6P | NASP     | MSH4     |          |          |
| GTF2B                                                | FAM40A                                           | RP4              | NOTCH2NL            | GPR89A   | NBPF16     | CREB3L4  | ARHGEF11 | LHX4     |          |          |
| RP11                                                 | SOX13                                            | PLXNA2           | NENF                | NVL      | NTPCR      | SLC5A6   | THADA    | CAMKMT   | PNPT1    | TIA1     |
| LINC00152                                            | RPL31                                            | RFX8             | CCDC115             | R3HDM1   | KIAA1715   |          | RPL37A   | ABCB6    |          |          |
| OR6B3                                                | RPL32                                            | UBE2E1           | APEH                | RBM6     | IFRD2      | MYH15    | WDR52    | RNF7     | U2SURP   |          |
| MCCC1                                                | EIF4G1                                           | RPL35A           | MYL5                | LETM1    | SOD3       | CLOCK    | IL8      | CXCL1    | RPL34    |          |
| NDUFC1                                               | MED10                                            | CCDC152          | NDUFS4              | MCCC2    | BTF3       | RPS23    | CTD      | PHF15    | CAMLG    | HARS     |
| ARHGAP26                                             |                                                  | TCERG1           | TCOF1               | LYRM4    | PAK1IP1    | GABBR1   | PPT2     | HLA-DMA  | VPS52    |          |
| RPS10                                                | TCP11                                            | C6orf226         |                     | RPL39P3  | BCKDHB     | MICAL1   | SERINC1  | HINT3    | MRPS12   |          |
| ALDH8A1                                              | AIG1                                             | TOMM7            | HNRNPA2B1           |          | CDK13      | GS1      | TMEM120A |          | C7orf59  |          |
| TRIP6                                                | ABCF2                                            | INTS10           | C8orf40             | RPS20    | RPL30      | POP1     | COX6C    | EIF3E    | KIFC2    |          |
| MFSD3                                                | GBA2                                             | FAM120A          | ZNF169              | IKBKAP   | IKBKAP-IT1 |          | C5       | RPL35    | PRPS1P2  |          |
| SLC27A4                                              | ODF2                                             | WDR34            | C9orf114            |          | NUP188     | FAM208B  | FBXO18   | CDNF     | AGAP6    |          |
| TSPAN14                                              | MMS19                                            | SFXN2            | TUBGCP2             | ZNF195   | RPS13      | FAM111A  | CPSF7    | MTA2     | GANAB    | FAU      |
| CCL13                                                | RPS6KB2                                          | CHKA             | C2CD3               | PIWIL4   | RNF214     | DPAGT1   | KLHDC5   | PHC1P1   | TIMELESS |          |
| MARS                                                 | POLR3B                                           | ANAPC7           | RBM19               | ANAPC5   | PXMP2      | MRPS31P2 |          | POMP     | KLF12    |          |
| COMMD6                                               | RALGAPA1                                         |                  | RPS29               | DHRS7    | NEK9       | POMT2    | RPL3P4   | TMEM85   | SRP14    |          |
| RSL24D1                                              | SLTM                                             | VPS13C           | PIAS1               | C16orf79 |            | GSPT1    | NPIPL3   | MIR4519  | C16orf57 |          |
| CTCF                                                 | RANBP10                                          | HAS3             | DDX19A              | SF3B3    | GALNS      | AFG3L1P  | CTNS     | C17orf85 |          |          |
| MYBBP1A                                              | ZMYND15                                          | FAM106B          | RPL19               | PNMT     |            | RPL27    | GPATCH8  | ZNF652   | MTMR4    | SLC39A11 |
| RPL38                                                | ASPSCR1                                          | HEXDC            | RAB12               | RPL36    | ZNF558     | DNMT1    | RAVER1   | SMARCA4  | ZNF69    |          |

Stable4\_20PerPair

| SAMD1          | MAST3                       | ARMC6                                           | U2AF1L4                  | ZNF781                  | SMG9    | TOMM40  | QPCTL  | PPP5C            | BCAT2   |
|----------------|-----------------------------|-------------------------------------------------|--------------------------|-------------------------|---------|---------|--------|------------------|---------|
| SNRNP70        | RPS9                        | TRAPP2                                          | LINC00493                |                         | TM9SF4  | NCOA6   | TAF4   | RPS21            | ATP5J   |
| IFNGR2         | TMEM50B                     | PI4KA                                           | CCDC116                  | BCR                     | CABIN1  | PIK3IP1 | NOL12  | RP3              | L3MBTL2 |
| TTL12          | PPARA                       | GTPBP6                                          | ZNF81                    | HDAC6                   | FAM156A | GPR173  | MAMLD1 | G6PD             |         |
| GOBPID         | Pvalue                      | OddsRatio                                       | ExpCount                 | Count                   | Size    | Term    |        |                  |         |
| GO:0000184     |                             | 1.1190553214695e-22                             | 23.1068251273345         |                         |         |         |        | 1.47401563905612 |         |
| 24             | 119                         | nuclear-transcribed mRNA                        | catabolic process,       | nonsense-mediated decay |         |         |        |                  |         |
| GO:0006414     |                             | 7.07099984389583e-20                            | 22.4493670886076         |                         |         |         |        | 1.30060203446128 |         |
| 21             | 105                         | translational elongation                        |                          |                         |         |         |        |                  |         |
| GO:0006614     |                             | 7.07099984389583e-20                            | 22.4493670886076         |                         |         |         |        | 1.30060203446128 |         |
| 21             | 105                         | SRP-dependent cotranslational protein targeting | to membrane              |                         |         |         |        |                  |         |
| GO:0006415     |                             | 7.50866062168435e-20                            | 25.1590043405085         |                         |         |         |        | 1.12718842986645 |         |
| 20             | 91                          | translational termination                       |                          |                         |         |         |        |                  |         |
| GO:0006613     |                             | 8.72545248415072e-20                            | 22.1836932241251         |                         |         |         |        | 1.31298872050377 |         |
| 21             | 106                         | cotranslational protein targeting               | to membrane              |                         |         |         |        |                  |         |
| GO:0045047     |                             | 8.72545248415072e-20                            | 22.1836932241251         |                         |         |         |        | 1.31298872050377 |         |
| 21             | 106                         | protein targeting to ER                         |                          |                         |         |         |        |                  |         |
| GO:0072599     |                             | 8.72545248415072e-20                            | 22.1836932241251         |                         |         |         |        | 1.31298872050377 |         |
| 21             | 106                         | establishment of protein localization           | to endoplasmic reticulum |                         |         |         |        |                  |         |
| GO:0006402     |                             | 1.52369410364955e-19                            | 14.9806892453951         |                         |         |         |        | 2.20483011556294 |         |
| 25             | 178                         | mRNA catabolic process                          |                          |                         |         |         |        |                  |         |
| GO:0006401     |                             | 3.77488203989601e-19                            | 13.3792675356921         |                         |         |         |        | 2.53927063871012 |         |
| 26             | 205                         | RNA catabolic process                           |                          |                         |         |         |        |                  |         |
| GO:0000956     |                             | 6.53020082084425e-19                            | 15.0855617352614         |                         |         |         |        | 2.09334994118054 |         |
| 24             | 169                         | nuclear-transcribed mRNA                        | catabolic process        |                         |         |         |        |                  |         |
| GO:0006413     |                             | 8.46080250430692e-19                            | 16.164231763069          | 1.88277627845824        |         |         |        |                  | 23      |
| 152            |                             | translational initiation                        |                          |                         |         |         |        |                  |         |
| GO:0070972     |                             | 9.20132139045525e-19                            | 19.4228761581626         |                         |         |         |        | 1.46162895301363 |         |
| 21             | 118                         | protein localization                            | to endoplasmic reticulum |                         |         |         |        |                  |         |
| GO:0043624     |                             | 1.56413266464346e-17                            | 15.1262702387319         |                         |         |         |        | 1.89516296450073 |         |
| 22             | 153                         | cellular protein complex                        | disassembly              |                         |         |         |        |                  |         |
| GO:0034623     |                             | 1.89801598067534e-17                            | 13.7876974019358         |                         |         |         |        | 2.15528337139298 |         |
| 23             | 174                         | cellular macromolecular                         | complex disassembly      |                         |         |         |        |                  |         |
| GO:0043241     |                             | 3.17356756115267e-17                            | 14.5650056200824         |                         |         |         |        | 1.95709639471317 |         |
| 22             | 158                         | protein complex                                 | disassembly              |                         |         |         |        |                  |         |
| GO:0032984     |                             | 3.61245688578415e-17                            | 13.3410585141354         |                         |         |         |        | 2.21721680160543 |         |
| 23             | 179                         | macromolecular                                  | complex disassembly      |                         |         |         |        |                  |         |
| GO:0019080     |                             | 1.77903389701337e-16                            | 14.4587147030185         |                         |         |         |        | 1.87038959241575 |         |
| 21             | 151                         | viral genome                                    | expression               |                         |         |         |        |                  |         |
| GO:0019083     |                             | 1.77903389701337e-16                            | 14.4587147030185         |                         |         |         |        | 1.87038959241575 |         |
| 21             | 151                         | viral transcription                             |                          |                         |         |         |        |                  |         |
| GO:0006612     |                             | 2.34259044725607e-16                            | 14.2376294591484         |                         |         |         |        | 1.89516296450073 |         |
| 21             | 153                         | protein targeting                               | to membrane              |                         |         |         |        |                  |         |
| GO:0072594     |                             | 6.78280275089811e-16                            | 11.47800679983           | 2.52688395266764        |         |         |        |                  | 23      |
| 204            |                             | establishment of protein localization           | to organelle             |                         |         |         |        |                  |         |
| GO:0019058     |                             | 1.03212754697973e-13                            | 9.42876299027824         |                         |         |         |        | 2.86132447581482 |         |
| 22             | 231                         | viral infectious                                | cycle                    |                         |         |         |        |                  |         |
| GO:0071845     |                             | 8.56361057481229e-13                            | 7.91465271637685         |                         |         |         |        | 3.51781883606671 |         |
| 23             | 284                         | cellular component                              | disassembly              | at cellular level       |         |         |        |                  |         |
| GO:0022411     |                             | 1.14741289271562e-12                            | 7.79296081277213         |                         |         |         |        | 3.56736558023666 |         |
| 23             | 288                         | cellular component                              | disassembly              |                         |         |         |        |                  |         |
| GO:0022415     |                             | 1.153664293109e-12                              | 8.26280575924637         |                         |         |         |        | 3.22053837104699 |         |
| 22             | 260                         | viral reproductive                              | process                  |                         |         |         |        |                  |         |
| GO:0016032     |                             | 3.23326928406376e-10                            | 5.27635510029876         |                         |         |         |        | 5.58639540516227 |         |
| 25             | 451                         | viral reproduction                              |                          |                         |         |         |        |                  |         |
| GO:0033365     |                             | 8.7095212843007e-10                             | 5.00927643784787         |                         |         |         |        | 5.85890249809702 |         |
| 25             | 473                         | protein localization                            | to organelle             |                         |         |         |        |                  |         |
| GO:0006605     |                             | 9.09802069589796e-10                            | 4.99775836635525         |                         |         |         |        | 5.87128918413951 |         |
| 25             | 474                         | protein targeting                               |                          |                         |         |         |        |                  |         |
| Tissue:        | Nerve_Tibial=>Artery_Tibial | Type:                                           | asymmetric               |                         |         |         |        |                  |         |
| SourceGene:    | SNORD14E(ENSG00000200879.1) |                                                 |                          |                         |         |         |        |                  |         |
| TargetGeneSet: | RPS8                        | GAS5                                            | EIF3FP3                  | IWS1                    | RPL15   | RPL14   | RPL24  | EPB41L4A-AS1     |         |
| MIR4454        | RPS10                       | RPL10A                                          | RPS20                    | RPL7A                   | RPS13   | RP11    | U6     | MARS             | DHRS12  |

STable4\_20PerPair

| RPL23A                                | ACACA    | RPL19                | RPS10P2  | PHEX-AS1         | Count             | Size               | Term                                                                |        |
|---------------------------------------|----------|----------------------|----------|------------------|-------------------|--------------------|---------------------------------------------------------------------|--------|
| GOBPID                                | Pvalue   | OddsRatio            | ExpCount |                  |                   |                    |                                                                     |        |
| GO:0006415                            |          | 4.41889237162837e-22 |          | 493.4875         |                   | 0.0944571309943949 |                                                                     | 11     |
| 91                                    |          |                      |          |                  |                   |                    | translational termination                                           |        |
| GO:0006414                            |          | 2.31803923774973e-21 |          | 419.579787234043 |                   |                    | 0.108988997301225                                                   |        |
| 11                                    | 105      |                      |          |                  |                   |                    | translational elongation                                            |        |
| GO:0006614                            |          | 2.31803923774973e-21 |          | 419.579787234043 |                   |                    | 0.108988997301225                                                   |        |
| 11                                    | 105      |                      |          |                  |                   |                    | SRP-dependent cotranslational protein targeting to membrane         |        |
| GO:0006613                            |          | 2.58578316147057e-21 |          | 415.134210526316 |                   |                    | 0.110026987751713                                                   |        |
| 11                                    | 106      |                      |          |                  |                   |                    | cotranslational protein targeting to membrane                       |        |
| GO:0045047                            |          | 2.58578316147057e-21 |          | 415.134210526316 |                   |                    | 0.110026987751713                                                   |        |
| 11                                    | 106      |                      |          |                  |                   |                    | protein targeting to ER                                             |        |
| GO:0072599                            |          | 2.58578316147057e-21 |          | 415.134210526316 |                   |                    | 0.110026987751713                                                   |        |
| 11                                    | 106      |                      |          |                  |                   |                    | establishment of protein localization to endoplasmic reticulum      |        |
| GO:0070972                            |          | 8.87277980524406e-21 |          | 368.268691588785 |                   |                    | 0.122482873157567                                                   |        |
| 11                                    | 118      |                      |          |                  |                   |                    | protein localization to endoplasmic reticulum                       |        |
| GO:0000184                            |          | 9.77398975571312e-21 |          | 364.833333333333 |                   |                    | 0.123520863608055                                                   |        |
| 11                                    | 119      |                      |          |                  |                   |                    | nuclear-transcribed mRNA catabolic process, nonsense-mediated decay |        |
| GO:0019080                            |          | 1.47625530308852e-19 |          | 280.814285714286 |                   |                    | 0.156736558023666                                                   |        |
| 11                                    | 151      |                      |          |                  |                   |                    | viral genome expression                                             |        |
| GO:0019083                            |          | 1.47625530308852e-19 |          | 280.814285714286 |                   |                    | 0.156736558023666                                                   |        |
| 11                                    | 151      |                      |          |                  |                   |                    | viral transcription                                                 |        |
| GO:0006413                            |          | 1.59101650924014e-19 |          | 278.803191489362 |                   |                    | 0.157774548474154                                                   |        |
| 11                                    | 152      |                      |          |                  |                   |                    | translational initiation                                            |        |
| GO:0006612                            |          | 1.71382512639667e-19 |          | 276.820422535211 |                   |                    | 0.158812538924642                                                   |        |
| 11                                    | 153      |                      |          |                  |                   |                    | protein targeting to membrane                                       |        |
| GO:0043624                            |          | 1.71382512639667e-19 |          | 276.820422535211 |                   |                    | 0.158812538924642                                                   |        |
| 11                                    | 153      |                      |          |                  |                   |                    | cellular protein complex disassembly                                |        |
| GO:0043241                            |          | 2.46721559375237e-19 |          | 267.311224489796 |                   |                    | 0.164002491177081                                                   |        |
| 11                                    | 158      |                      |          |                  |                   |                    | protein complex disassembly                                         |        |
| GO:0000956                            |          | 5.28191363405507e-19 |          | 248.509493670886 |                   |                    | 0.175420386132448                                                   |        |
| 11                                    | 169      |                      |          |                  |                   |                    | nuclear-transcribed mRNA catabolic process                          |        |
| GO:0034623                            |          | 7.34103891523919e-19 |          | 240.802147239264 |                   |                    | 0.180610338384887                                                   |        |
| 11                                    | 174      |                      |          |                  |                   |                    | cellular macromolecular complex disassembly                         |        |
| GO:0006402                            |          | 9.48644375554893e-19 |          | 234.968562874251 |                   |                    | 0.184762300186838                                                   |        |
| 11                                    | 178      |                      |          |                  |                   |                    | mRNA catabolic process                                              |        |
| GO:0032984                            |          | 1.01049864840513e-18 |          | 233.553571428571 |                   |                    | 0.185800290637326                                                   |        |
| 11                                    | 179      |                      |          |                  |                   |                    | macromolecular complex disassembly                                  |        |
| GO:0072594                            |          | 4.39820261133927e-18 |          | 202.944300518135 |                   |                    | 0.211750051899523                                                   |        |
| 11                                    | 204      |                      |          |                  |                   |                    | establishment of protein localization to organelle                  |        |
| GO:0006401                            |          | 4.64639077626831e-18 |          | 201.884020618557 |                   |                    | 0.21278804235001                                                    |        |
| 11                                    | 205      |                      |          |                  |                   |                    | RNA catabolic process                                               |        |
| GO:0019058                            |          | 1.77093774552353e-17 |          | 177.7            | 0.239775794062695 |                    | 11                                                                  | 231    |
|                                       |          |                      |          |                  |                   |                    | viral infectious cycle                                              |        |
| GO:0022415                            |          | 6.63448392011275e-17 |          | 156.683734939759 |                   |                    | 0.269877517126842                                                   |        |
| 11                                    | 260      |                      |          |                  |                   |                    | viral reproductive process                                          |        |
| GO:0071845                            |          | 1.77370479174115e-16 |          | 142.667582417582 |                   |                    | 0.294789287938551                                                   |        |
| 11                                    | 284      |                      |          |                  |                   |                    | cellular component disassembly at cellular level                    |        |
| GO:0022411                            |          | 2.07226688558269e-16 |          | 140.567689530686 |                   |                    | 0.298941249740502                                                   |        |
| 11                                    | 288      |                      |          |                  |                   |                    | cellular component disassembly                                      |        |
| GO:0016032                            |          | 2.95985130748601e-14 |          | 87.475           | 0.468133693170023 |                    | 11                                                                  | 451    |
|                                       |          |                      |          |                  |                   |                    | viral reproduction                                                  |        |
| GO:0033365                            |          | 4.99810743614271e-14 |          | 83.1785714285714 |                   |                    | 0.490969483080756                                                   |        |
| 11                                    | 473      |                      |          |                  |                   |                    | protein localization to organelle                                   |        |
| GO:0006605                            |          | 5.11551529694795e-14 |          | 82.9929805615551 |                   |                    | 0.492007473531244                                                   |        |
| 11                                    | 474      |                      |          |                  |                   |                    | protein targeting                                                   |        |
| Tissue: Nerve_Tibial=>Artery_Tibial   |          |                      |          | Type:            | asymmetric        |                    |                                                                     |        |
| SourceGene: TCERG1(ENSG00000113649.7) |          |                      |          |                  |                   |                    |                                                                     |        |
| TargetGeneSet:                        | MTND1P23 | RBBP4                | BTBD19   | PRPF38A          | DDAH1             | RP11               | RP4                                                                 |        |
| WDR77                                 | CD58     | GAPDHP32             | SF3B4    | RPRD2            | KCNJ9             | TRAF5              | CAPN2                                                               | TOMM20 |
| COX20                                 | PXDN     | DDIT3                | LRPPRC   | EIF3FP3          | TIA1              | TTL                | KIF5C                                                               | FMNL2  |
| SATB2                                 | CLN5     | RPL15                | RPL14    | KIAA1143         |                   | MFLS1              | PARL                                                                | YTHDC1 |
| RXFP1                                 | OXCT1    | ITGA1                | HNRNPA0  | RBM27            | ATXN1             | RPL10A             | EFHC1                                                               | SNHG5  |
|                                       |          |                      |          |                  |                   |                    |                                                                     | MICAL1 |
|                                       |          |                      |          |                  |                   |                    |                                                                     | DDO    |

Stable4\_20PerPair

| RNF217     | SCAF8   | OSBPL3               | EIF4H            | MEPCE             | CBLL1    | EEF1D                                                                                | POLR1E | VPS13A            | RPL35    |
|------------|---------|----------------------|------------------|-------------------|----------|--------------------------------------------------------------------------------------|--------|-------------------|----------|
| RPL12      | NUP214  | UCK1                 | ARHGAP12         |                   | HECTD2   | WDR11                                                                                | RPS3   | SIK2              | BCAT1    |
| RPL14P1    | CRADD   | RPL18AP3             |                  | BRAP              | KATNAL1  | VPS36                                                                                | CARS2  | OXA1L             | PRKD1    |
| L2HGDH     | ATP6V1D | STRCP1               | GS1              | NUDT21            | FHOD1    | TERF2                                                                                | ATXN1L | COX4I1            | METTTL16 |
| PELP1      | POLR2A  | ATP1B2               | RPL23A           | RPL19             | HEXIM2   | ROCK1P1                                                                              | SF3A2  | KHSRP             | ZNF426   |
| RPL18A     | FXDY7   | ZNF383               | RPS16            | FBL               | HNRNPUL1 |                                                                                      | BCAT2  | RPL18             | ATF5     |
| RPL28      | PSMF1   | NSFL1C               | DHX35            | STX16             | SF3A1    | ARSA                                                                                 | SYP    | USP51             | GPRASP2  |
| GOBPID     | Pvalue  | OddsRatio            | ExpCount         | Count             | Size     | Term                                                                                 |        |                   |          |
| GO:0006414 |         | 1.56335372159536e-13 | 24.5800636267232 |                   |          | translational elongation                                                             |        | 0.690263649574424 |          |
| 13         | 105     |                      |                  |                   |          |                                                                                      |        |                   |          |
| GO:0006415 |         | 6.56816657422186e-13 | 26.1284123837121 |                   |          | translational termination                                                            |        | 0.598228496297834 |          |
| 12         | 91      |                      |                  |                   |          |                                                                                      |        |                   |          |
| GO:0006614 |         | 3.77056663558359e-12 | 22.1733385153517 |                   |          | SRP-dependent cotranslational protein targeting to membrane                          |        | 0.690263649574424 |          |
| 12         | 105     |                      |                  |                   |          |                                                                                      |        |                   |          |
| GO:0006613 |         | 4.22928844262792e-12 | 21.9359138682389 |                   |          | cotranslational protein targeting to membrane                                        |        | 0.69683758909418  |          |
| 12         | 106     |                      |                  |                   |          |                                                                                      |        |                   |          |
| GO:0045047 |         | 4.22928844262792e-12 | 21.9359138682389 |                   |          | protein targeting to ER                                                              |        | 0.69683758909418  |          |
| 12         | 106     |                      |                  |                   |          |                                                                                      |        |                   |          |
| GO:0072599 |         | 4.22928844262792e-12 | 21.9359138682389 |                   |          | establishment of protein localization to endoplasmic reticulum                       |        | 0.69683758909418  |          |
| 12         | 106     |                      |                  |                   |          |                                                                                      |        |                   |          |
| GO:0070972 |         | 1.53784848908999e-11 | 19.43623550807   | 0.775724863331257 |          | protein localization to endoplasmic reticulum                                        |        | 12                |          |
| 118        |         |                      |                  |                   |          |                                                                                      |        |                   |          |
| GO:0000184 |         | 1.70121226068845e-11 | 19.2532372480577 |                   |          | nuclear-transcribed mRNA catabolic process, nonsense-mediated decay                  |        | 0.782298802851014 |          |
| 12         | 119     |                      |                  |                   |          |                                                                                      |        |                   |          |
| GO:0019080 |         | 1.75656333887671e-11 | 16.3338635560269 |                   |          | viral genome expression                                                              |        | 0.992664867483219 |          |
| 13         | 151     |                      |                  |                   |          |                                                                                      |        |                   |          |
| GO:0019083 |         | 1.75656333887671e-11 | 16.3338635560269 |                   |          | viral transcription                                                                  |        | 0.992664867483219 |          |
| 13         | 151     |                      |                  |                   |          |                                                                                      |        |                   |          |
| GO:0006413 |         | 1.91066564467994e-11 | 16.2152131952974 |                   |          | translational initiation                                                             |        | 0.999238807002976 |          |
| 13         | 152     |                      |                  |                   |          |                                                                                      |        |                   |          |
| GO:0043624 |         | 2.0770172462924e-11  | 16.0982578397213 |                   |          | cellular protein complex disassembly                                                 |        | 1.00581274652273  |          |
| 13         | 153     |                      |                  |                   |          |                                                                                      |        |                   |          |
| GO:0043241 |         | 3.12506272799019e-11 | 15.5376787216148 |                   |          | protein complex disassembly                                                          |        | 1.03868244412151  |          |
| 13         | 158     |                      |                  |                   |          |                                                                                      |        |                   |          |
| GO:0034623 |         | 1.05506307305378e-10 | 13.9778063929708 |                   |          | cellular macromolecular complex disassembly                                          |        | 1.14386547643762  |          |
| 13         | 174     |                      |                  |                   |          |                                                                                      |        |                   |          |
| GO:0032984 |         | 1.50448375706582e-10 | 13.5520129297679 |                   |          | macromolecular complex disassembly                                                   |        | 1.1767351740364   | 13       |
| 179        |         |                      |                  |                   |          |                                                                                      |        |                   |          |
| GO:0006612 |         | 3.29941084523034e-10 | 14.5757498077416 |                   |          | protein targeting to membrane                                                        |        | 1.00581274652273  |          |
| 12         | 153     |                      |                  |                   |          |                                                                                      |        |                   |          |
| GO:0072594 |         | 7.62029550948366e-10 | 11.7574383859022 |                   |          | establishment of protein localization to organelle                                   |        | 1.34108366203031  |          |
| 13         | 204     |                      |                  |                   |          |                                                                                      |        |                   |          |
| GO:0000375 |         | 1.02626805736932e-09 | 11.4534594325535 |                   |          | RNA splicing, via transesterification reactions                                      |        | 1.37395335962909  |          |
| 13         | 209     |                      |                  |                   |          |                                                                                      |        |                   |          |
| GO:0000956 |         | 1.04297389651935e-09 | 13.0755889801243 |                   |          | nuclear-transcribed mRNA catabolic process                                           |        | 1.11099577883883  |          |
| 12         | 169     |                      |                  |                   |          |                                                                                      |        |                   |          |
| GO:0006402 |         | 1.89125595617685e-09 | 12.3588329220496 |                   |          | mRNA catabolic process                                                               |        | 1.17016123451664  |          |
| 12         | 178     |                      |                  |                   |          |                                                                                      |        |                   |          |
| GO:0008380 |         | 2.75953277936573e-09 | 8.55194805194805 |                   |          | RNA splicing                                                                         |        | 2.12338246488132  |          |
| 15         | 323     |                      |                  |                   |          |                                                                                      |        |                   |          |
| GO:0019058 |         | 3.47914056166851e-09 | 10.2816066234057 |                   |          | viral infectious cycle                                                               |        | 1.51858002906373  |          |
| 13         | 231     |                      |                  |                   |          |                                                                                      |        |                   |          |
| GO:0006397 |         | 6.36362819839496e-09 | 7.38896784215223 |                   |          | mRNA processing                                                                      |        | 2.62300186838281  |          |
| 16         | 399     |                      |                  |                   |          |                                                                                      |        |                   |          |
| GO:0000377 |         | 8.87693882294628e-09 | 10.6656626506024 |                   |          | RNA splicing, via transesterification reactions with bulged adenosine as nucleophile |        | 1.34108366203031  |          |
| 12         | 204     |                      |                  |                   |          |                                                                                      |        |                   |          |
| GO:0000398 |         | 8.87693882294628e-09 | 10.6656626506024 |                   |          | nuclear mRNA splicing, via spliceosome                                               |        | 1.34108366203031  |          |
| 12         | 204     |                      |                  |                   |          |                                                                                      |        |                   |          |
| GO:0006401 |         | 9.37855334306275e-09 | 10.6096510393907 |                   |          | RNA catabolic process                                                                |        | 1.34765760155007  |          |
| 12         | 205     |                      |                  |                   |          |                                                                                      |        |                   |          |
| GO:0022415 |         | 1.44200116716393e-08 | 9.05584082156611 |                   |          | viral reproductive process                                                           |        | 1.70922427513667  |          |
| 13         | 260     |                      |                  |                   |          |                                                                                      |        |                   |          |

Stable4\_20PerPair

|                                     |                           |                                                                     |                  |
|-------------------------------------|---------------------------|---------------------------------------------------------------------|------------------|
| GO:0071845                          | 4.10392679977806e-08      | 8.23980739807398                                                    | 1.86699882361082 |
| 13                                  | 284                       | cellular component disassembly at cellular level                    |                  |
| GO:0022411                          | 4.83723793618626e-08      | 8.11764966740576                                                    | 1.89329458168985 |
| 13                                  | 288                       | cellular component disassembly                                      |                  |
| GO:0033365                          | 6.88199245180791e-08      | 6.1597097194139                                                     | 3.10947339284479 |
| 473                                 | protein                   | localization to organelle                                           | 16               |
| GO:0016032                          | 2.30380449189281e-07      | 5.98623853211009                                                    | 2.96484672341014 |
| 15                                  | 451                       | viral reproduction                                                  |                  |
| GO:0006605                          | 4.34989579975314e-07      | 5.67687908496732                                                    | 3.11604733236454 |
| 15                                  | 474                       | protein targeting                                                   |                  |
| Tissue: Nerve_Tibial=>Artery_Tibial | Type:                     | asymmetric                                                          |                  |
| SourceGene:                         | UBE2E1(ENSG00000170142.7) |                                                                     |                  |
| TargetGeneSet:                      | SDHB                      | ATPIF1                                                              | TAF12            |
| UQCRH                               | RWD3                      | RP11                                                                | HBXIP            |
| PFDN2                               | NAV1                      | SNRPE                                                               | LYST-IT2         |
| TPRKB                               | DGUOK                     | MITD1                                                               | RPL31            |
| CCDC72                              | SPCS1                     | RPL24                                                               | NDUFB4           |
| CLOCK                               | BDH2                      | NDUFC1                                                              | ANAPC10          |
| MAP1B                               | TBCA                      | COX7C                                                               | CTD              |
| RPS10                               | RPL10A                    | MEAL                                                                | MRPL2            |
| CHCHD2                              | BUD31                     | C7orf59                                                             | PMS2P1           |
| SSBP1                               | DCTN6                     | C8orf40                                                             | FNTA             |
| TATDN1                              | C9orf133                  | NDUFB6                                                              | VPS13A           |
| RPL12                               | SWI5                      | NUP188                                                              | VPS26A           |
| C11orf31                            | C11orf10                  | GANAB                                                               | POLR2G           |
| UBE4A                               | ATP5L                     | COX14                                                               | RPL41            |
| MED13L                              | DIABLO                    | ARL6IP4                                                             | POMP             |
| NDUFB1                              | DYNC1H1                   | C14orf2                                                             | SRP14            |
| RPS17L                              | IQGAP1                    | RPS15A                                                              | TERF2IP          |
| RPL19                               | RPS7P11                   | BPTF                                                                | TRIM65           |
| NDUFA7                              | PIN1                      | NDUFA13                                                             | ALKBH6           |
| RPS5                                | LINC00493                 | ROMO1                                                               | UQCR10           |
| TIMM17B                             | HUWE1                     | TCEAL8                                                              | NGFRAP1          |
| GOBPID                              | Pvalue                    | OddsRatio                                                           | ExpCount         |
| GO:0006614                          | 1.93501935783393e-35      | 46.6360655737705                                                    | Count            |
| 30                                  | 105                       | SRP-dependent cotranslational protein targeting to membrane         | Size             |
| GO:0006613                          | 2.67665026944318e-35      | 46.0191975841242                                                    | Term             |
| 30                                  | 106                       | cotranslational protein targeting to membrane                       |                  |
| GO:0045047                          | 2.67665026944318e-35      | 46.0191975841242                                                    |                  |
| 30                                  | 106                       | protein targeting to ER                                             |                  |
| GO:0072599                          | 2.67665026944318e-35      | 46.0191975841242                                                    |                  |
| 30                                  | 106                       | establishment of protein localization to endoplasmic reticulum      |                  |
| GO:0070972                          | 1.0070255646683e-33       | 39.7103204172876                                                    |                  |
| 30                                  | 118                       | protein localization to endoplasmic reticulum                       |                  |
| GO:0006414                          | 3.82515260888377e-32      | 41.7067448680352                                                    |                  |
| 28                                  | 105                       | translational elongation                                            |                  |
| GO:0006415                          | 9.22894034660175e-31      | 45.1873015873016                                                    |                  |
| 26                                  | 91                        | translational termination                                           |                  |
| GO:0072594                          | 3.98518260107929e-30      | 22.9113961374023                                                    |                  |
| 33                                  | 204                       | establishment of protein localization to organelle                  |                  |
| GO:0006612                          | 4.93071587865502e-30      | 28.3406637345062                                                    |                  |
| 30                                  | 153                       | protein targeting to membrane                                       |                  |
| GO:0000184                          | 2.13947470155618e-27      | 31.5203959720089                                                    |                  |
| 26                                  | 119                       | nuclear-transcribed mRNA catabolic process, nonsense-mediated decay |                  |
| GO:0019080                          | 2.48046465937381e-27      | 26.0246525045896                                                    |                  |
| 28                                  | 151                       | viral genome expression                                             |                  |
| GO:0019083                          | 2.48046465937381e-27      | 26.0246525045896                                                    |                  |
| 28                                  | 151                       | viral transcription                                                 |                  |
| GO:0043624                          | 9.2406972904508e-26       | 24.2965714285714                                                    |                  |
| 27                                  | 153                       | cellular protein complex disassembly                                |                  |
| GO:0043241                          | 2.29121967989197e-25      | 23.3609770992366                                                    |                  |
| 27                                  | 158                       | protein complex disassembly                                         |                  |
| GO:0000956                          | 1.51151156239037e-24      | 21.5345915492958                                                    |                  |

Stable4\_20PerPair

|                                     |                           |                                                        |                  |                  |           |         |          |                   |          |
|-------------------------------------|---------------------------|--------------------------------------------------------|------------------|------------------|-----------|---------|----------|-------------------|----------|
| 27                                  | 169                       | nuclear-transcribed mRNA catabolic process             |                  |                  |           |         |          |                   |          |
| GO:0006413                          |                           | 1.85405285265539e-24                                   | 23.2110103300579 |                  |           |         |          | 1.59878209120476  |          |
| 26                                  | 152                       | translational initiation                               |                  |                  |           |         |          |                   |          |
| GO:0033365                          |                           | 2.50837908810917e-24                                   | 11.0259573426859 |                  |           |         |          | 4.97515742855166  |          |
| 39                                  | 473                       | protein localization to organelle                      |                  |                  |           |         |          |                   |          |
| GO:0034623                          |                           | 3.40309038164766e-24                                   | 20.7947755102041 |                  |           |         |          | 1.83018476230019  |          |
| 27                                  | 174                       | cellular macromolecular complex disassembly            |                  |                  |           |         |          |                   |          |
| GO:0006402                          |                           | 6.39148121649979e-24                                   | 20.2381986754967 |                  |           |         |          | 1.87225797522663  |          |
| 27                                  | 178                       | mRNA catabolic process                                 |                  |                  |           |         |          |                   |          |
| GO:0032984                          |                           | 7.46337920381415e-24                                   | 20.1036315789474 |                  |           |         |          | 1.88277627845824  |          |
| 27                                  | 179                       | macromolecular complex disassembly                     |                  |                  |           |         |          |                   |          |
| GO:0019058                          |                           | 3.01553722160842e-23                                   | 16.4538758753924 |                  |           |         |          | 2.42972804650197  |          |
| 29                                  | 231                       | viral infectious cycle                                 |                  |                  |           |         |          |                   |          |
| GO:0006401                          |                           | 3.06751891538302e-22                                   | 17.135595505618  | 2.15625216248011 |           |         |          |                   | 27       |
| 205                                 | RNA                       | catabolic process                                      |                  |                  |           |         |          |                   |          |
| GO:0006605                          |                           | 3.11520177880595e-22                                   | 10.2058302656452 |                  |           |         |          | 4.98567573178327  |          |
| 37                                  | 474                       | protein targeting                                      |                  |                  |           |         |          |                   |          |
| GO:0016032                          |                           | 5.90534725579859e-22                                   | 10.3827170751973 |                  |           |         |          | 4.74375475745623  |          |
| 36                                  | 451                       | viral reproduction                                     |                  |                  |           |         |          |                   |          |
| GO:0022415                          |                           | 9.02941465379931e-22                                   | 14.3586386513216 |                  |           |         |          | 2.73475884021867  |          |
| 29                                  | 260                       | viral reproductive process                             |                  |                  |           |         |          |                   |          |
| GO:0071845                          |                           | 1.10110053202151e-20                                   | 12.9850470269409 |                  |           |         |          | 2.98719811777732  |          |
| 29                                  | 284                       | cellular component disassembly at cellular level       |                  |                  |           |         |          |                   |          |
| GO:0022411                          |                           | 1.63163906717007e-20                                   | 12.7808644881816 |                  |           |         |          | 3.02927133070376  |          |
| 29                                  | 288                       | cellular component disassembly                         |                  |                  |           |         |          |                   |          |
| GO:0022904                          |                           | 6.67156536268756e-14                                   | 19.2187077588537 |                  |           |         |          | 1.00975711023459  |          |
| 15                                  | 96                        | respiratory electron transport chain                   |                  |                  |           |         |          |                   |          |
| GO:0022900                          |                           | 9.91866284412494e-12                                   | 13.0466785254248 |                  |           |         |          | 1.40945263303578  |          |
| 15                                  | 134                       | electron transport chain                               |                  |                  |           |         |          |                   |          |
| GO:0045333                          |                           | 2.31037940751085e-11                                   | 12.2179435599747 |                  |           |         |          | 1.49359905888866  |          |
| 15                                  | 142                       | cellular respiration                                   |                  |                  |           |         |          |                   |          |
| GO:0042773                          |                           | 1.20364804133444e-09                                   | 23.6196172248804 |                  |           |         |          | 0.494360251885683 |          |
| 9                                   | 47                        | ATP synthesis coupled electron transport               |                  |                  |           |         |          |                   |          |
| GO:0042775                          |                           | 1.20364804133444e-09                                   | 23.6196172248804 |                  |           |         |          | 0.494360251885683 |          |
| 9                                   | 47                        | mitochondrial ATP synthesis coupled electron transport |                  |                  |           |         |          |                   |          |
| GO:0015980                          |                           | 3.72440504716403e-09                                   | 6.51190414708465 |                  |           |         |          | 3.22911909210435  |          |
| 18                                  | 307                       | energy derivation by oxidation of organic compounds    |                  |                  |           |         |          |                   |          |
| GO:0006119                          |                           | 8.52537130747957e-09                                   | 18.3031254459826 |                  |           |         |          | 0.610061587433396 |          |
| 9                                   | 58                        | oxidative phosphorylation                              |                  |                  |           |         |          |                   |          |
| GO:0006120                          |                           | 8.01587204193473e-08                                   | 23.7550535077289 |                  |           |         |          | 0.37865891633797  |          |
| 7                                   | 36                        | mitochondrial electron transport, NADH to ubiquinone   |                  |                  |           |         |          |                   |          |
| GO:0006091                          |                           | 1.1846145623813e-07                                    | 4.851554313657   | 4.50183378312919 |           |         |          |                   | 19       |
| 428                                 |                           | generation of precursor metabolites and energy         |                  |                  |           |         |          |                   |          |
| Tissue: Artery_Tibial=>Nerve_Tibial |                           | Type: asymmetric                                       |                  |                  |           |         |          |                   |          |
| SourceGene:                         | YAE1D1(ENSG00000241127.3) |                                                        |                  |                  |           |         |          |                   |          |
| TargetGeneSet:                      | MRPL20                    | MINOS1                                                 | CDC42            | ZCCHC17          | RP11      | PSMB2   | PPCS     | CCDC30            |          |
| MAGOH                               | SLC35D1                   | COL24A1                                                | ACTG1P4          | BCAS2            | U1        | FAM72C  | MRPS21   | RP1               | ALDH9A1  |
| TMCO1                               | XPR1                      | SNRPE                                                  | TARBP1           | YWHAQ            | SLC4A1AP  | MORN2   | PPM1B    | CCDC115           | AGPS     |
| UBE2E3                              | C2orf47                   | NDUFB3                                                 | MRPL44           | SEPT2            | CNTN4-AS1 | TPRXL   | UBE2E1   | CCDC72            | RBM6     |
| SPCS1                               | PSMC1P1                   | RNF7                                                   | MRPL47           | NDUFB5           | MYL5      | EVC2    | UTP3     | MRPS18C           | TMSB4XP8 |
| NDUFC1                              | NDUFS6                    | RBBP4P1                                                | ZNF622           | SUB1             | TAF9      | CTD     | PRRC1    | UQCRQ             | TCOF1    |
| FGFR4                               | TMEM14B                   | NHLRC1                                                 | HIST1H1E         |                  | PPP1R10   | HNRNPC  | COX6A1P2 |                   | FRS3     |
| KIAA0240                            |                           | C6orf226                                               |                  | MAD2L1BP         |           | RPL39P3 | COX7A2   | FAM54A            | PSMB1    |
| FTSJ2                               | NUDT1                     | NDUFA4                                                 | TOMM7            | MALSU1           | POM121C   | GNG11   | BUD31    | PMS2P1            | PSMC2    |
| MRPS33                              | LSM1                      | KAT6A                                                  | MRPL15           | TCEB1            | C8orf59   | COX6C   | POLR2K   | C9orf123          |          |
| C9orf133                            |                           | CTSL1                                                  | SEC61B           | MSANTD3          | CTNNAL1   | TXN     | DFNB31   | FBXW2             | ODF2     |
| C9orf104                            |                           | FBX018                                                 | ATP5C1           | CDC123           | SAR1A     | POLR2L  | ARNTL    | IMMP1L            | FNBP4    |
| MRPL16                              | FEN1                      | C11orf30                                               |                  | SNORA32          | ATP5L     | PANX3   | PHC1P1   | MYL6              | MED13L   |
| RPL31P52                            |                           | DIABLO                                                 | RPS7P10          | POMP             | COMMD6    | RPS29   | PSMA3    | ERH               | NDUFB1   |
| C14orf2                             | HMG2P5                    | TMEM85                                                 | SRP14            | GTF2A2           | ANXA2     | COX5A   | FAM100A  | NDUFAB1           | HMG2P3   |
| KIF22                               | TBX6                      | MIR4519                                                | RANBP10          | MLLT6            | MSI2      | ATP5H   | MRPS7    | H3F3B             | USP36    |
| MYL12B                              | IER3IP1                   | DYM                                                    | C19orf70         |                  | PIN1      | ZNF653  | C19orf44 |                   | UQCRFS1  |
| COX6B1                              | POLR2I                    | TBC1D17                                                | NDUFA3           | MCM8             | SNRPB2    | ROMO1   | RP3      | PFDN4             | ATP5J    |
|                                     |                           |                                                        |                  |                  |           |         |          |                   | PIGP     |



Stable4\_20PerPair

| BCR                                                  | BCRP8    | SNRPD3                                                              | UQCR10           | MORC2            | LGALS1   | NDUFA6            | EEF1B2P3 | FATE1    |          |      |
|------------------------------------------------------|----------|---------------------------------------------------------------------|------------------|------------------|----------|-------------------|----------|----------|----------|------|
| HMGN1P26                                             |          |                                                                     |                  |                  |          |                   |          |          |          |      |
| GOBPID                                               | Pvalue   | OddsRatio                                                           | ExpCount         | Count            | Size     | Term              |          |          |          |      |
| GO:0022904                                           |          | 1.08446173673158e-20                                                | 31.6644436644437 |                  |          | 0.863608054805896 |          |          |          |      |
| 19                                                   | 96       | respiratory electron transport chain                                |                  |                  |          |                   |          |          |          |      |
| GO:0022900                                           |          | 3.66206446297357e-19                                                | 22.658692185008  | 1.20545290983323 |          | 20                |          |          |          |      |
| 134                                                  |          | electron transport chain                                            |                  |                  |          |                   |          |          |          |      |
| GO:0045333                                           |          | 1.20307042226636e-18                                                | 21.1609538002981 |                  |          | 1.27742024773372  |          |          |          |      |
| 20                                                   | 142      | cellular respiration                                                |                  |                  |          |                   |          |          |          |      |
| GO:0015980                                           |          | 4.10583548678421e-14                                                | 10.032228719948  | 2.76174659193135 |          | 22                |          |          |          |      |
| 307                                                  |          | energy derivation by oxidation of organic compounds                 |                  |                  |          |                   |          |          |          |      |
| GO:0006119                                           |          | 3.23436620881736e-12                                                | 28.0733059181119 |                  |          | 0.521763199778562 |          |          |          |      |
| 11                                                   | 58       | oxidative phosphorylation                                           |                  |                  |          |                   |          |          |          |      |
| GO:0006091                                           |          | 4.297180398149e-12                                                  | 7.38590054228684 |                  |          | 3.85025257767629  |          |          |          |      |
| 23                                                   | 428      | generation of precursor metabolites and energy                      |                  |                  |          |                   |          |          |          |      |
| GO:0042773                                           |          | 9.54978224417832e-12                                                | 32.1711711711712 |                  |          | 0.422808110165386 |          |          |          |      |
| 10                                                   | 47       | ATP synthesis coupled electron transport                            |                  |                  |          |                   |          |          |          |      |
| GO:0042775                                           |          | 9.54978224417832e-12                                                | 32.1711711711712 |                  |          | 0.422808110165386 |          |          |          |      |
| 10                                                   | 47       | mitochondrial ATP synthesis coupled electron transport              |                  |                  |          |                   |          |          |          |      |
| GO:0006120                                           |          | 2.23648849422177e-11                                                | 39.3774104683196 |                  |          | 0.323853020552211 |          |          |          |      |
| 9                                                    | 36       | mitochondrial electron transport, NADH to ubiquinone                |                  |                  |          |                   |          |          |          |      |
| GO:0000375                                           |          | 2.87742340673222e-06                                                | 6.59337068160598 |                  |          | 1.88014670265034  |          |          |          |      |
| 11                                                   | 209      | RNA splicing, via transesterification reactions                     |                  |                  |          |                   |          |          |          |      |
| GO:0042776                                           |          | 4.19856001155518e-06                                                | 50.4832451499118 |                  |          | 0.116946924088298 |          |          |          |      |
| 4                                                    | 13       | mitochondrial ATP synthesis coupled proton transport                |                  |                  |          |                   |          |          |          |      |
| GO:0015985                                           |          | 1.73520865905422e-05                                                | 32.4421768707483 |                  |          | 0.161926510276105 |          |          |          |      |
| 4                                                    | 18       | energy coupled proton transport, down electrochemical gradient      |                  |                  |          |                   |          |          |          |      |
| GO:0015986                                           |          | 1.73520865905422e-05                                                | 32.4421768707483 |                  |          | 0.161926510276105 |          |          |          |      |
| 4                                                    | 18       | ATP synthesis coupled proton transport                              |                  |                  |          |                   |          |          |          |      |
| Tissue: Artery_Tibial=>Nerve_Tibial Type: asymmetric |          |                                                                     |                  |                  |          |                   |          |          |          |      |
| SourceGene: YEATS4(ENSG00000127337.2)                |          |                                                                     |                  |                  |          |                   |          |          |          |      |
| TargetGeneSet:                                       | RP11     | RP13                                                                | SLC45A1          | TMEM201          | FAM131C  | CROCCP3           | RPL11    | MAP7D1   |          |      |
| MFSD2A                                               | RP3      | SNORD46                                                             | TMEM69           | CSRP3            | CELSR2   | GDAP2             | CCT3     | ATP1A2   | RCS1     |      |
| KDM5B-AS1                                            |          | TMEM81                                                              | ST13P19          | ZNF692           | LPIN1    | SRSF7             | EIF3FP3  | NFU1     | CAPG     |      |
| RPL31                                                | RFX8     | SLC6A6                                                              | PLCL2            | RPL14            | QARS     | PHF7              | SHQ1     | P2RY13   | EIF4G1   |      |
| RPL35A                                               | MYL5     | RPL7AP31                                                            |                  | PAICS            | RPL34    | INTU              | NPY1R    | EXOC3    | MTRR     | CCT5 |
| BTF3                                                 | F2RL1    | FBXL17                                                              | CAMLG            | CD74             | RPS14    | GAPDHP71          |          | BTN2A3P  | RPS10    |      |
| C6orf226                                             |          | SLC18B1                                                             | MRPS12           | PERP             | RPL23P8  | GS1               | TMEM120A |          | MKRN1    |      |
| ABCF2                                                | C8orf40  | RPS20                                                               | RPL30            | POP1             | COX6C    | CTHRC1            | SCRIB    | GBA2     | ZNF169   |      |
| IKBKAP                                               | GGTA1P   | PRPS1P2                                                             | C9orf114         |                  | ABCA2    | PARD3             | ZNF37A   | TSPAN14  | RPL13AP5 |      |
| SFRP5                                                | PLEKHA1  | ZNF195                                                              | EIF3F            | RPS13            | MTA2     | DNAJC4            | FAU      | CDK2AP2  | UNC93B1  |      |
| CEP57                                                | RPS25    | HYOU1                                                               | KCNJ5            | FKBP4            | RP4      | KLRF1             | FMNL3    | ATP5G2   | MARS     |      |
| RPL14P1                                              | KRT8P22  | YEATS4                                                              | SLC25A3          | GLT8D2           | ISCU     | PUS1              | RPS7P10  | WBP4     | OXA1L    |      |
| NUBPL                                                | RPS6KL1  | NEK9                                                                | TTL5             | GLRX5            | MEG8     | BTBD6             | IGHV3-7  | OIP5-AS1 |          |      |
| PLA2G4B                                              | GRAMD2   | HEXA                                                                | C16orf79         |                  | ERVK13-1 |                   | HCFC1R1  | CLEC16A  | CTD      |      |
| PYCARD                                               | C16orf46 |                                                                     | ZNF469           | RP1              | CTNS     | MYBBP1A           | ALDOC    | GPR179   | RPL17    |      |
| RPL19                                                | KRT223P  | GHDC                                                                | RPL27            | HILS1            | RPL38    | FBF1              | ZFP161   | RAB12    | DSC2     |      |
| ZCCHC2                                               | RPL36    | SMARCA4                                                             | UBA52            | ZNF708           | RPS16    | ZNF541            | BCAT2    | ZNF808   | RPS9     |      |
| ZNF470                                               | NOP56    | ELMO2                                                               | RPS21            | RTN4R            | ZNF280B  | RANGAP1           | CRELD2   | STS      | ZNF81    |      |
| RPL7P57                                              | DIAPH2   | CXorf1                                                              |                  |                  |          |                   |          |          |          |      |
| GOBPID                                               | Pvalue   | OddsRatio                                                           | ExpCount         | Count            | Size     | Term              |          |          |          |      |
| GO:0006415                                           |          | 3.1428413168975e-24                                                 | 38.8636363636364 |                  |          | 0.824925610684382 |          |          |          |      |
| 21                                                   | 91       | translational termination                                           |                  |                  |          |                   |          |          |          |      |
| GO:0000184                                           |          | 4.60956574832672e-23                                                | 29.5948169866641 |                  |          | 1.07874887551035  |          |          |          |      |
| 22                                                   | 119      | nuclear-transcribed mRNA catabolic process, nonsense-mediated decay |                  |                  |          |                   |          |          |          |      |
| GO:0006414                                           |          | 8.19925129889536e-23                                                | 32.3545454545455 |                  |          | 0.951837243097364 |          |          |          |      |
| 21                                                   | 105      | translational elongation                                            |                  |                  |          |                   |          |          |          |      |
| GO:0006614                                           |          | 8.19925129889536e-23                                                | 32.3545454545455 |                  |          | 0.951837243097364 |          |          |          |      |
| 21                                                   | 105      | SRP-dependent cotranslational protein targeting to membrane         |                  |                  |          |                   |          |          |          |      |
| GO:0006613                                           |          | 1.01502290635405e-22                                                | 31.9716577540107 |                  |          | 0.960902359698291 |          |          |          |      |
| 21                                                   | 106      | cotranslational protein targeting to membrane                       |                  |                  |          |                   |          |          |          |      |
| GO:0045047                                           |          | 1.01502290635405e-22                                                | 31.9716577540107 |                  |          | 0.960902359698291 |          |          |          |      |
| 21                                                   | 106      | protein targeting to ER                                             |                  |                  |          |                   |          |          |          |      |

Stable4\_20PerPair

|                                                   |                      |                                                                |                   |        |         |        |         |         |        |      |
|---------------------------------------------------|----------------------|----------------------------------------------------------------|-------------------|--------|---------|--------|---------|---------|--------|------|
| GO:0072599                                        | 1.01502290635405e-22 | 31.9716577540107                                               | 0.960902359698291 |        |         |        |         |         |        |      |
| 21                                                | 106                  | establishment of protein localization to endoplasmic reticulum |                   |        |         |        |         |         |        |      |
| GO:0006413                                        | 5.48981075299118e-22 | 23.4275768016078                                               | 1.37789772334095  |        |         |        |         |         |        |      |
| 23                                                | 152                  | translational initiation                                       |                   |        |         |        |         |         |        |      |
| GO:0034623                                        | 6.32326500172459e-22 | 21.188785046729                                                | 1.57733028856135  | 24     |         |        |         |         |        |      |
| 174                                               |                      | cellular macromolecular complex disassembly                    |                   |        |         |        |         |         |        |      |
| GO:0043624                                        | 6.41441462649512e-22 | 23.2457264957265                                               | 1.38696283994187  |        |         |        |         |         |        |      |
| 23                                                | 153                  | cellular protein complex disassembly                           |                   |        |         |        |         |         |        |      |
| GO:0070972                                        | 1.11243590681068e-21 | 27.9927835051546                                               | 1.06968375890942  |        |         |        |         |         |        |      |
| 21                                                | 118                  | protein localization to endoplasmic reticulum                  |                   |        |         |        |         |         |        |      |
| GO:0032984                                        | 1.26394354349116e-21 | 20.49804039795                                                 | 1.62265587156598  | 24     |         |        |         |         |        |      |
| 179                                               |                      | macromolecular complex disassembly                             |                   |        |         |        |         |         |        |      |
| GO:0043241                                        | 1.37344324543283e-21 | 22.3768861454047                                               | 1.43228842294651  |        |         |        |         |         |        |      |
| 23                                                | 158                  | protein complex disassembly                                    |                   |        |         |        |         |         |        |      |
| GO:0019080                                        | 1.09227039286321e-20 | 22.2033994737216                                               | 1.36883260674002  |        |         |        |         |         |        |      |
| 22                                                | 151                  | viral genome expression                                        |                   |        |         |        |         |         |        |      |
| GO:0019083                                        | 1.09227039286321e-20 | 22.2033994737216                                               | 1.36883260674002  |        |         |        |         |         |        |      |
| 22                                                | 151                  | viral transcription                                            |                   |        |         |        |         |         |        |      |
| GO:0006612                                        | 1.46997069689745e-20 | 21.8613348273689                                               | 1.38696283994187  |        |         |        |         |         |        |      |
| 22                                                | 153                  | protein targeting to membrane                                  |                   |        |         |        |         |         |        |      |
| GO:0000956                                        | 1.3648602001262e-19  | 19.4599013917494                                               | 1.53200470555671  |        |         |        |         |         |        |      |
| 22                                                | 169                  | nuclear-transcribed mRNA catabolic process                     |                   |        |         |        |         |         |        |      |
| GO:0006402                                        | 4.31521714479814e-19 | 18.3255704540108                                               | 1.61359075496505  |        |         |        |         |         |        |      |
| 22                                                | 178                  | mRNA catabolic process                                         |                   |        |         |        |         |         |        |      |
| GO:0006401                                        | 5.82224420843747e-19 | 16.5432437932438                                               | 1.85834890319009  |        |         |        |         |         |        |      |
| 23                                                | 205                  | RNA catabolic process                                          |                   |        |         |        |         |         |        |      |
| GO:0071845                                        | 7.0820758368039e-17  | 12.1294033069734                                               | 2.57449311466334  |        |         |        |         |         |        |      |
| 24                                                | 284                  | cellular component disassembly at cellular level               |                   |        |         |        |         |         |        |      |
| GO:0022411                                        | 9.76231353416179e-17 | 11.9422259983008                                               | 2.61075358106705  |        |         |        |         |         |        |      |
| 24                                                | 288                  | cellular component disassembly                                 |                   |        |         |        |         |         |        |      |
| GO:0019058                                        | 1.24754327370916e-16 | 13.6272332206663                                               | 2.0940419348142   | 22     |         |        |         |         |        |      |
| 231                                               |                      | viral infectious cycle                                         |                   |        |         |        |         |         |        |      |
| GO:0072594                                        | 1.32874576152819e-16 | 14.7479880774963                                               | 1.84928378658916  |        |         |        |         |         |        |      |
| 21                                                | 204                  | establishment of protein localization to organelle             |                   |        |         |        |         |         |        |      |
| GO:0022415                                        | 1.5313899745717e-15  | 11.9421787063449                                               | 2.35693031624109  |        |         |        |         |         |        |      |
| 22                                                | 260                  | viral reproductive process                                     |                   |        |         |        |         |         |        |      |
| GO:0006605                                        | 8.02267033340791e-13 | 7.28610749254108                                               | 4.29686526883953  |        |         |        |         |         |        |      |
| 25                                                | 474                  | protein targeting                                              |                   |        |         |        |         |         |        |      |
| GO:0033365                                        | 3.84720495659742e-11 | 6.56399176954733                                               | 4.2878001522386   | 23     |         |        |         |         |        |      |
| 473                                               |                      | protein localization to organelle                              |                   |        |         |        |         |         |        |      |
| GO:0016032                                        | 1.01508531448093e-10 | 6.535403434486                                                 | 4.0883675870182   | 22 451 |         |        |         |         |        |      |
|                                                   |                      | viral reproduction                                             |                   |        |         |        |         |         |        |      |
| GO:0006364                                        | 4.56921504894388e-06 | 9.63685636856369                                               | 0.942772126496436 |        |         |        |         |         |        |      |
| 8                                                 | 104                  | rRNA processing                                                |                   |        |         |        |         |         |        |      |
| GO:0016072                                        | 6.94523902936424e-06 | 9.06615654391838                                               | 0.997162826102    | 8      |         |        |         |         |        |      |
| 110                                               |                      | rRNA metabolic process                                         |                   |        |         |        |         |         |        |      |
| GO:0042254                                        | 8.39393584807817e-06 | 7.47189695550351                                               | 1.35070237353816  |        |         |        |         |         |        |      |
| 9                                                 | 149                  | ribosome biogenesis                                            |                   |        |         |        |         |         |        |      |
| GO:0034660                                        | 1.08073032336964e-05 | 5.18866007941638                                               | 2.58355823126427  |        |         |        |         |         |        |      |
| 12                                                | 285                  | ncRNA metabolic process                                        |                   |        |         |        |         |         |        |      |
| GO:0071843                                        | 1.11563267010338e-05 | 5.6656432748538                                                | 2.16656286762162  | 11     |         |        |         |         |        |      |
| 239                                               |                      | cellular component biogenesis at cellular level                |                   |        |         |        |         |         |        |      |
| GO:0034470                                        | 1.38935912753098e-05 | 6.14615050021749                                               | 1.81302332018545  |        |         |        |         |         |        |      |
| 10                                                | 200                  | ncRNA processing                                               |                   |        |         |        |         |         |        |      |
| GO:0042274                                        | 1.7884689744967e-05  | 32.1844769403825                                               | 0.163172098816691 |        |         |        |         |         |        |      |
| 4                                                 | 18                   | ribosomal small subunit biogenesis                             |                   |        |         |        |         |         |        |      |
| Tissue: Skin_Sun_Exposed_Lower_leg=>Artery_Tibial |                      | Type: cluster                                                  |                   |        |         |        |         |         |        |      |
| SourceGene: ACTG1P3(ENSG00000215388.3)            |                      |                                                                |                   |        |         |        |         |         |        |      |
| TargetGeneSet:                                    | RP11                 | NBPF5                                                          | SNAPIN            | FLAD1  | LAMTOR2 | MRPL24 | TIMM17A | PYCR2   |        |      |
| TFB2M                                             | OST4                 | TRIM54                                                         | GEMIN6            | COMMD1 | SNRPG   | TANC1  | ATP5G3  | IQSEC1  | UMPS   |      |
| ETV5-AS1                                          |                      | NDUFC1                                                         | NDUFS6            | SKP2   | EGFLAM  | POC5   | CETN3   | ASS1P10 | EEF1E1 |      |
| TBC1D7                                            | MED20                | COX7A2                                                         | YAE1D1            | MTERF  | PMS2P1  | POP7   | NDUFB2  | TMEM74  | PCBD1  |      |
| MRPS16                                            | SRP9P1               | PTPRE                                                          | POLR2L            | HARBI1 | COX8A   | EI24   | SMUG1   | MMAB    | POP5   | DENR |

Stable4\_20PerPair

| MRPL52                                            | ARG2     | COX16     | SLIRP                            | C14orf2          | MRPS11            | POLR3K            | C16orf91 | NDUFAB1   |
|---------------------------------------------------|----------|-----------|----------------------------------|------------------|-------------------|-------------------|----------|-----------|
| PSMB6                                             | TXNDC17  | ATP5G1    | PHB                              | C17orf89         |                   | UQCR11            | NDUFA7   | PIN1      |
| DDX49                                             | NDUFA13  | COX6B1    | GEMIN7                           | AP2S1            | PLCB1             | RPS27AP2          |          | ZNFX1     |
| TUBA8                                             | UQCR10   | HDHD1     | NDUFA1                           |                  |                   |                   |          | ATP5E     |
| GOBPID                                            | Pvalue   | OddsRatio | ExpCount                         | Count            | Size              | Term              |          |           |
| GO:0022904                                        | 13       | 96        | 3.24556440118388e-16             | 42.2655148897477 |                   | 0.43844716628607  |          |           |
|                                                   |          |           |                                  |                  |                   |                   |          |           |
| GO:0022900                                        | 13       | 134       | 2.79075475944671e-14             | 28.9150163729924 |                   | 0.61199916960764  |          |           |
|                                                   |          |           |                                  |                  |                   |                   |          |           |
| GO:0045333                                        | 142      |           | 5.97504778100445e-14             | 27.106625713032  | 0.648536433464812 |                   |          | 13        |
|                                                   |          |           |                                  |                  |                   |                   |          |           |
| GO:0015980                                        |          |           | 1.03829670147942e-09             | 11.756064690027  | 1.402117500519    |                   |          | 13        |
|                                                   |          |           |                                  |                  |                   |                   |          | 307       |
| GO:0042773                                        | 7        | 47        | 1.62773256372155e-09             | 42.5487288135593 |                   | 0.214656425160889 |          |           |
|                                                   |          |           |                                  |                  |                   |                   |          |           |
| GO:0042775                                        | 7        | 47        | 1.62773256372155e-09             | 42.5487288135593 |                   | 0.214656425160889 |          |           |
|                                                   |          |           |                                  |                  |                   |                   |          |           |
| GO:0006119                                        | 58       |           | 7.48133722625455e-09             | 33.345962113659  | 0.264895162964501 |                   |          | 7         |
|                                                   |          |           |                                  |                  |                   |                   |          |           |
| GO:0006120                                        |          |           | 1.25847848280961e-08             | 47.85            | 0.164417687357276 |                   |          | 6         |
|                                                   |          |           |                                  |                  |                   |                   |          | 36        |
| GO:0006091                                        | 13       | 428       | 5.5191971543385e-08              | 8.25687656285519 |                   | 1.95474361635873  |          |           |
|                                                   |          |           |                                  |                  |                   |                   |          |           |
| GO:0000387                                        | 4        | 31        | 1.13792270258561e-05             | 34.3082437275986 |                   | 0.141581897446543 |          |           |
|                                                   |          |           |                                  |                  |                   |                   |          |           |
| Tissue: Skin_Sun_Exposed_Lower_leg=>Artery_Tibial |          |           |                                  |                  |                   | Type: cluster     |          |           |
| SourceGene:                                       |          |           | CNOT6(ENSG00000113300.7)         |                  |                   |                   |          |           |
| TargetGeneSet:                                    | AURKAIP1 | XKR8      | GPBP1L1                          | MAGOH            | RWDD3             | RP11              | PYCR2    |           |
| MRPL33                                            | SNRPG    | MYEOV2    | GTPBP8                           | RNF7             | PDCD6             | SKP2              | FST      | ATOX1     |
| KLHDC3                                            | COX7A2   | GPR126    | RP1                              | TMEM242          | SEC61G            | SKP1P1            | BRI3     | POP7      |
| C7orf29                                           | BAG4     | MRPS35    | ZBTB34                           | CACFD1           | C9orf69           | CHCHD1            | BUB3     | C11orf10  |
| COX8A                                             | PPP1R14B |           | PHLDB1                           | MRPL51           | FAM86FP           | COX14             | ESRRAP1  | MRPL52    |
| COX16                                             | GTF2A2   | CORO2B    | COX5A                            | POLR3K           | NDUFAB1           | CNEP1R1           | TMEM208  | C14orf167 |
| SNX11                                             | MRPL27   | ATP5H     | UQCR11                           | SIRT6            | CLPP              | C19orf79          |          |           |
| NDUFA13                                           | COX6B1   | CTU1      | ATP5E                            | UQCR10           | RPS19BP1          |                   |          |           |
| GOBPID                                            | Pvalue   | OddsRatio | ExpCount                         | Count            | Size              | Term              |          |           |
| GO:0022904                                        | 9        | 96        | 2.83657356242712e-11             | 37.0215517241379 |                   | 0.325513805272992 |          |           |
|                                                   |          |           |                                  |                  |                   |                   |          |           |
| GO:0022900                                        | 9        | 134       | 5.80245845438919e-10             | 25.6986          | 0.454363019860217 |                   |          | 9         |
|                                                   |          |           |                                  |                  |                   |                   |          | 134       |
| GO:0045333                                        | 9        | 142       | 9.73660960242165e-10             | 24.1392857142857 |                   | 0.481489170299633 |          |           |
|                                                   |          |           |                                  |                  |                   |                   |          |           |
| GO:0015980                                        | 9        | 307       | 7.63431626646694e-07             | 10.6489932885906 |                   | 1.04096602311259  |          |           |
|                                                   |          |           |                                  |                  |                   |                   |          |           |
| GO:0006091                                        | 9        | 428       | 1.15696279473892e-05             | 7.50877088305489 |                   | 1.45124904850875  |          |           |
|                                                   |          |           |                                  |                  |                   |                   |          |           |
| Tissue: Artery_Tibial=>Skin_Sun_Exposed_Lower_leg |          |           |                                  |                  |                   | Type: asymmetric  |          |           |
| SourceGene:                                       |          |           | CTD-2547L16.3(ENSG00000253384.1) |                  |                   |                   |          |           |
| TargetGeneSet:                                    | C1QC     | C1QB      | LAPTM5                           | BMP8A            | CD53              | FCER1G            | PTPRC    | CR1       |
| HS1BP3-IT1                                        | BRE      | U6        | CHST13                           | CP               | SPOCK1            | DOCK2             | CTB      | SDCBP     |
| HRCT1                                             | SVEP1    | SUSD1     | APBB1IP                          | HPS1             | SERPING1          | MS4A7             | SLC15A3  | ALDH3B1   |
| C1S                                               | C3AR1    | LRP1      | SELPLG                           | CHST14           | TEPP              | IRF8              | CYBA     | CD68      |
| ANKFN1                                            | C19orf59 |           | LRRC25                           | TYROBP           | ZSCAN18           | CTSA              | ATP6AP2  | FAM120C   |
| SASH3                                             | TMLHE    |           |                                  |                  |                   |                   |          | GLA       |
| GOBPID                                            | Pvalue   | OddsRatio | ExpCount                         | Count            | Size              | Term              |          |           |
| GO:0002460                                        | 9        | 181       | 7.41189648208857e-10             | 25.6954691259022 |                   | 0.475953221230365 |          |           |
|                                                   |          |           |                                  |                  |                   |                   |          |           |
| GO:0002250                                        | 9        | 198       | 1.64056603770991e-09             | 23.3563218390805 |                   | 0.520656009964708 |          |           |
|                                                   |          |           |                                  |                  |                   |                   |          |           |
| GO:0002449                                        | 8        | 167       | 9.79027258973292e-09             | 23.9060796645702 |                   | 0.439139159919729 |          |           |
|                                                   |          |           |                                  |                  |                   |                   |          |           |
| GO:0002252                                        |          |           | 3.99113913874788e-08             | 13.3330167173252 |                   | 1.01501626185039  |          |           |

STable4\_20PerPair

|            |     |                                                                      |                  |                   |  |  |   |                    |     |
|------------|-----|----------------------------------------------------------------------|------------------|-------------------|--|--|---|--------------------|-----|
| 10         | 386 | immune effector process                                              |                  |                   |  |  |   |                    |     |
| GO:0002443 |     | 6.07249161939955e-08                                                 | 18.6666666666667 |                   |  |  |   | 0.554840495467442  |     |
| 8          | 211 | leukocyte mediated immunity                                          |                  |                   |  |  |   |                    |     |
| GO:0006958 |     | 1.85988125384329e-07                                                 | 48.3771043771044 |                   |  |  |   | 0.131478790395128  |     |
| 5          | 50  | complement activation, classical pathway                             |                  |                   |  |  |   |                    |     |
| GO:0016064 |     | 4.05110284594765e-07                                                 | 25.55            | 0.291882914677185 |  |  | 6 |                    | 111 |
|            |     | immunoglobulin mediated immune response                              |                  |                   |  |  |   |                    |     |
| GO:0019724 |     | 4.74438212221084e-07                                                 | 24.8350694444444 |                   |  |  |   | 0.299771642100893  |     |
| 6          | 114 | B cell mediated immunity                                             |                  |                   |  |  |   |                    |     |
| GO:0006956 |     | 6.0190430144779e-07                                                  | 37.5             | 0.165663275897862 |  |  | 5 |                    | 63  |
|            |     | complement activation                                                |                  |                   |  |  |   |                    |     |
| GO:0002455 |     | 7.04631537401598e-07                                                 | 36.2449494949495 |                   |  |  |   | 0.170922427513667  |     |
| 5          | 65  | humoral immune response mediated by circulating immunoglobulin       |                  |                   |  |  |   |                    |     |
| GO:0072376 |     | 2.25343803708071e-06                                                 | 28.2093663911846 |                   |  |  |   | 0.215625216248011  |     |
| 5          | 82  | protein activation cascade                                           |                  |                   |  |  |   |                    |     |
| GO:0050778 |     | 3.78880573433601e-06                                                 | 10.5295880149813 |                   |  |  |   | 0.957165594076534  |     |
| 8          | 364 | positive regulation of immune response                               |                  |                   |  |  |   |                    |     |
| GO:0002253 |     | 1.10142986865853e-05                                                 | 10.9199072028281 |                   |  |  |   | 0.786243166562868  |     |
| 7          | 299 | activation of immune response                                        |                  |                   |  |  |   |                    |     |
| GO:0002697 |     | 1.28020566668088e-05                                                 | 13.6711538461538 |                   |  |  |   | 0.528544737388416  |     |
| 6          | 201 | regulation of immune effector process                                |                  |                   |  |  |   |                    |     |
| GO:0006959 |     | 1.58627604246756e-05                                                 | 18.5133385133385 |                   |  |  |   | 0.320808248564113  |     |
| 5          | 122 | humoral immune response                                              |                  |                   |  |  |   |                    |     |
|            |     | Tissue: Artery_Tibial=>Skin_Sun_Exposed_Lower_leg                    |                  |                   |  |  |   | Type: asymmetric   |     |
|            |     | SourceGene: ENSG00000225059.1                                        |                  |                   |  |  |   |                    |     |
|            |     | TargetGeneSet: DENND2D FLG2 LCE1F LCE1E LCE1C LCE1B LCE1A HMCN1 GDF7 |                  |                   |  |  |   |                    |     |
|            |     | ADAMTS9-AS1 BCL6 BTC ANKRD32 GLIS3 CCDC77 PLEKHG6 NFE2 LRCH1 RP11    |                  |                   |  |  |   |                    |     |
|            |     | G2E3 CES4A VN2R10P GSDMA CALR SYS1-DBNDD2 MIS18A ETS2 GRPR           |                  |                   |  |  |   |                    |     |
|            |     | GOBPID Pvalue OddsRatio ExpCount Count Size Term                     |                  |                   |  |  |   |                    |     |
| GO:0031424 |     | 1.82922189146044e-09                                                 | 138.947876447876 |                   |  |  |   | 0.0552210919659539 |     |
| 5          | 42  | keratinization                                                       |                  |                   |  |  |   |                    |     |
| GO:0030216 |     | 1.13167210273534e-07                                                 | 57.5561797752809 |                   |  |  |   | 0.123590062971421  |     |
| 5          | 94  | keratinocyte differentiation                                         |                  |                   |  |  |   |                    |     |
| GO:0009913 |     | 2.49078956408045e-07                                                 | 48.7312925170068 |                   |  |  |   | 0.144626669434641  |     |
| 5          | 110 | epidermal cell differentiation                                       |                  |                   |  |  |   |                    |     |
| GO:0030855 |     | 1.14741895604588e-06                                                 | 23.6722408026756 |                   |  |  |   | 0.370770188914262  |     |
| 6          | 282 | epithelial cell differentiation                                      |                  |                   |  |  |   |                    |     |
| GO:0008544 |     | 1.62241952436155e-05                                                 | 20.0963718820862 |                   |  |  |   | 0.33790049131548   |     |
| 5          | 257 | epidermis development                                                |                  |                   |  |  |   |                    |     |
|            |     | Tissue: Skin_Sun_Exposed_Lower_leg=>Artery_Tibial                    |                  |                   |  |  |   | Type: asymmetric   |     |
|            |     | SourceGene: IGFBP5(ENSG00000115461.4)                                |                  |                   |  |  |   |                    |     |
|            |     | TargetGeneSet: FOXO6 RPL5 RPS7 COX7A2L NCAPH RPL15 MAP1B RP11 NPM1   |                  |                   |  |  |   |                    |     |
|            |     | RPL15P3 MICA RPL10A SPDYE1 SEMA3C EIF3E RPL7A VTI1A RPL27A FAT3      |                  |                   |  |  |   |                    |     |
|            |     | GLBD2 RSL24D1 SEC11A NLRP12                                          |                  |                   |  |  |   |                    |     |
|            |     | GOBPID Pvalue OddsRatio ExpCount Count Size Term                     |                  |                   |  |  |   |                    |     |
| GO:0006614 |     | 9.33838843882724e-11                                                 | 73.1224489795918 |                   |  |  |   | 0.152584596221715  |     |
| 7          | 105 | SRP-dependent cotranslational protein targeting to membrane          |                  |                   |  |  |   |                    |     |
| GO:0006613 |     | 9.99015863106583e-11                                                 | 72.3787878787879 |                   |  |  |   | 0.154037782852398  |     |
| 7          | 106 | cotranslational protein targeting to membrane                        |                  |                   |  |  |   |                    |     |
| GO:0045047 |     | 9.99015863106583e-11                                                 | 72.3787878787879 |                   |  |  |   | 0.154037782852398  |     |
| 7          | 106 | protein targeting to ER                                              |                  |                   |  |  |   |                    |     |
| GO:0072599 |     | 9.99015863106583e-11                                                 | 72.3787878787879 |                   |  |  |   | 0.154037782852398  |     |
| 7          | 106 | establishment of protein localization to endoplasmic reticulum       |                  |                   |  |  |   |                    |     |
| GO:0070972 |     | 2.13927239416294e-10                                                 | 64.5             | 0.171476022420594 |  |  | 7 |                    | 118 |
|            |     | protein localization to endoplasmic reticulum                        |                  |                   |  |  |   |                    |     |
| GO:0000184 |     | 2.27103890190469e-10                                                 | 63.9196428571429 |                   |  |  |   | 0.172929209051277  |     |
| 7          | 119 | nuclear-transcribed mRNA catabolic process, nonsense-mediated decay  |                  |                   |  |  |   |                    |     |
| GO:0006413 |     | 1.27428244380048e-09                                                 | 49.2586206896552 |                   |  |  |   | 0.220884367863816  |     |
| 7          | 152 | translational initiation                                             |                  |                   |  |  |   |                    |     |
| GO:0006612 |     | 1.33423773257923e-09                                                 | 48.9178082191781 |                   |  |  |   | 0.222337554494499  |     |
| 7          | 153 | protein targeting to membrane                                        |                  |                   |  |  |   |                    |     |
| GO:0043624 |     | 1.33423773257923e-09                                                 | 48.9178082191781 |                   |  |  |   | 0.222337554494499  |     |
| 7          | 153 | cellular protein complex disassembly                                 |                  |                   |  |  |   |                    |     |

Stable4\_20PerPair

|                                                   |                                                                |                  |                     |        |        |                   |          |        |        |
|---------------------------------------------------|----------------------------------------------------------------|------------------|---------------------|--------|--------|-------------------|----------|--------|--------|
| GO:0043241                                        | 1.67139039472262e-09                                           | 47.2814569536424 | 0.229603487647914   |        |        |                   |          |        |        |
| 7 158                                             | protein complex disassembly                                    |                  |                     |        |        |                   |          |        |        |
| GO:0006415                                        | 2.65350413836654e-09                                           | 67.5058823529412 | 0.132239983392153   |        |        |                   |          |        |        |
| 6 91                                              | translational termination                                      |                  |                     |        |        |                   |          |        |        |
| GO:0000956                                        | 2.67584712446114e-09                                           | 44.037037037037  | 0.245588540585427 7 |        |        |                   |          |        |        |
| 169                                               | nuclear-transcribed mRNA catabolic process                     |                  |                     |        |        |                   |          |        |        |
| GO:0034623                                        | 3.27969306330938e-09                                           | 42.7035928143713 | 0.252854473738842   |        |        |                   |          |        |        |
| 7 174                                             | cellular macromolecular complex disassembly                    |                  |                     |        |        |                   |          |        |        |
| GO:0006402                                        | 3.84282202852439e-09                                           | 41.6929824561403 | 0.258667220261574   |        |        |                   |          |        |        |
| 7 178                                             | mRNA catabolic process                                         |                  |                     |        |        |                   |          |        |        |
| GO:0032984                                        | 3.99579626860457e-09                                           | 41.4476744186046 | 0.260120406892257   |        |        |                   |          |        |        |
| 7 179                                             | macromolecular complex disassembly                             |                  |                     |        |        |                   |          |        |        |
| GO:0006414                                        | 6.32691400295807e-09                                           | 57.9030303030303 | 0.152584596221715   |        |        |                   |          |        |        |
| 6 105                                             | translational elongation                                       |                  |                     |        |        |                   |          |        |        |
| GO:0072594                                        | 9.91149384902272e-09                                           | 36.1243654822335 | 0.296450072659332   |        |        |                   |          |        |        |
| 7 204                                             | establishment of protein localization to organelle             |                  |                     |        |        |                   |          |        |        |
| GO:0006401                                        | 1.02531144534909e-08                                           | 35.9393939393939 | 0.297903259290015   |        |        |                   |          |        |        |
| 7 205                                             | RNA catabolic process                                          |                  |                     |        |        |                   |          |        |        |
| GO:0019080                                        | 5.61716063210416e-08                                           | 39.4068965517241 | 0.219431181233133   |        |        |                   |          |        |        |
| 6 151                                             | viral genome expression                                        |                  |                     |        |        |                   |          |        |        |
| GO:0019083                                        | 5.61716063210416e-08                                           | 39.4068965517241 | 0.219431181233133   |        |        |                   |          |        |        |
| 6 151                                             | viral transcription                                            |                  |                     |        |        |                   |          |        |        |
| GO:0071845                                        | 9.65983470197068e-08                                           | 25.5469314079422 | 0.412705003113971   |        |        |                   |          |        |        |
| 7 284                                             | cellular component disassembly at cellular level               |                  |                     |        |        |                   |          |        |        |
| GO:0022411                                        | 1.06279105736804e-07                                           | 25.1761565836299 | 0.418517749636703   |        |        |                   |          |        |        |
| 7 288                                             | cellular component disassembly                                 |                  |                     |        |        |                   |          |        |        |
| GO:0033365                                        | 1.73630693240662e-07                                           | 18.4813895781638 | 0.687357276313058   |        |        |                   |          |        |        |
| 8 473                                             | protein localization to organelle                              |                  |                     |        |        |                   |          |        |        |
| GO:0006605                                        | 1.76466691210442e-07                                           | 18.4404093760317 | 0.688810462943741   |        |        |                   |          |        |        |
| 8 474                                             | protein targeting                                              |                  |                     |        |        |                   |          |        |        |
| GO:0022613                                        | 5.9483776486576e-07                                            | 25.9561643835616 | 0.326966991903675   |        |        |                   |          |        |        |
| 6 225                                             | ribonucleoprotein complex biogenesis                           |                  |                     |        |        |                   |          |        |        |
| GO:0019058                                        | 6.9406123036348e-07                                            | 25.2533333333333 | 0.335686111687772   |        |        |                   |          |        |        |
| 6 231                                             | viral infectious cycle                                         |                  |                     |        |        |                   |          |        |        |
| GO:0071843                                        | 8.47127712974072e-07                                           | 24.3725321888412 | 0.347311604733236   |        |        |                   |          |        |        |
| 6 239                                             | cellular component biogenesis at cellular level                |                  |                     |        |        |                   |          |        |        |
| GO:0022415                                        | 1.38494421022697e-06                                           | 22.3244094488189 | 0.377828523977579   |        |        |                   |          |        |        |
| 6 260                                             | viral reproductive process                                     |                  |                     |        |        |                   |          |        |        |
| GO:0042254                                        | 1.94069486231348e-06                                           | 31.0026041666667 | 0.216524807971767   |        |        |                   |          |        |        |
| 5 149                                             | ribosome biogenesis                                            |                  |                     |        |        |                   |          |        |        |
| Tissue: Artery_Tibial=>Skin_Sun_Exposed_Lower_leg |                                                                | Type: asymmetric |                     |        |        |                   |          |        |        |
| SourceGene:                                       | MIR590(ENSG00000207741.1)                                      |                  |                     |        |        |                   |          |        |        |
| TargetGeneSet:                                    | MXRA8                                                          | DNAJC16          | EYA3                | CCDC23 | RP4    | CTSS              | UFC1     | DNM3OS |        |
| GPR37L1                                           | RAB4A                                                          | IAH1             | SPDYA               | UBC    | SP5    | NIF3L1            | EEF1B2   | RPL15  | CP     |
| TTC14                                             | PPP1R2                                                         | RP11             | FAM190A             | RPS3A  | SPCS3  | BDP1              | ADAMTS19 |        | F13A1  |
| KLHDC3                                            | EEF1A1                                                         | UBE2J1           | BRD7P3              | HEBP2  | PSMB1  | EEF1A1P6          |          | SBDS   | NCF1B  |
| CCL26                                             | RPS3AP26                                                       |                  | LY96                | CHMP4C | DAPK1  | RPS3AP5           | SLC35G1  | TSSC2  | EIF3F  |
| RPS13                                             | HPS5                                                           | LMO2             | RP1                 | FTH1   | RBM14  | JRKL              | GAPDH    | DAZAP2 | PFDN5  |
| APPL2                                             | RPL6                                                           | TPT1             | CCNB1IP1            |        | TRDC   | EXD2              | PAPLN    | TRPM7  | PKM2   |
| NTAN1                                             | RPS15A                                                         | GOT2             | CHTF8               | CTD    | RNF167 | CD68              | RPL26    | COX10  | ZNHIT3 |
| RPL17                                             | FTL                                                            | RP3              |                     |        |        |                   |          |        |        |
| GOBPID                                            | Pvalue                                                         | OddsRatio        | ExpCount            | Count  | Size   | Term              |          |        |        |
| GO:0006414                                        | 1.47673546624249e-11                                           | 30.0968421052632 |                     |        |        | 0.435955989204899 |          |        |        |
| 10 105                                            | translational elongation                                       |                  |                     |        |        |                   |          |        |        |
| GO:0006614                                        | 4.32985424798658e-10                                           | 26.2775735294118 |                     |        |        | 0.435955989204899 |          |        |        |
| 9 105                                             | SRP-dependent cotranslational protein targeting to membrane    |                  |                     |        |        |                   |          |        |        |
| GO:0006613                                        | 4.71651216055801e-10                                           | 26.0048514251061 |                     |        |        | 0.440107951006851 |          |        |        |
| 9 106                                             | cotranslational protein targeting to membrane                  |                  |                     |        |        |                   |          |        |        |
| GO:0045047                                        | 4.71651216055801e-10                                           | 26.0048514251061 |                     |        |        | 0.440107951006851 |          |        |        |
| 9 106                                             | protein targeting to ER                                        |                  |                     |        |        |                   |          |        |        |
| GO:0072599                                        | 4.71651216055801e-10                                           | 26.0048514251061 |                     |        |        | 0.440107951006851 |          |        |        |
| 9 106                                             | establishment of protein localization to endoplasmic reticulum |                  |                     |        |        |                   |          |        |        |
| GO:0070972                                        | 1.23586942312019e-09                                           | 23.1225040474906 |                     |        |        | 0.489931492630268 |          |        |        |

Stable4\_20PerPair

|                                                               |     |                                                                     |                  |  |  |  |  |                   |   |
|---------------------------------------------------------------|-----|---------------------------------------------------------------------|------------------|--|--|--|--|-------------------|---|
| 9                                                             | 118 | protein localization to endoplasmic reticulum                       |                  |  |  |  |  |                   |   |
| GO:0006415                                                    |     | 3.53907690704808e-09                                                | 26.5208526413346 |  |  |  |  | 0.377828523977579 |   |
| 8                                                             | 91  | translational termination                                           |                  |  |  |  |  |                   |   |
| GO:0006413                                                    |     | 1.16255483641681e-08                                                | 17.5828877005348 |  |  |  |  | 0.631098193896616 |   |
| 9                                                             | 152 | translational initiation                                            |                  |  |  |  |  |                   |   |
| GO:0006612                                                    |     | 1.23127224219466e-08                                                | 17.4595588235294 |  |  |  |  | 0.635250155698568 |   |
| 9                                                             | 153 | protein targeting to membrane                                       |                  |  |  |  |  |                   |   |
| GO:0043624                                                    |     | 1.23127224219466e-08                                                | 17.4595588235294 |  |  |  |  | 0.635250155698568 |   |
| 9                                                             | 153 | cellular protein complex disassembly                                |                  |  |  |  |  |                   |   |
| GO:0043241                                                    |     | 1.63102119620009e-08                                                | 16.8677457560205 |  |  |  |  | 0.656009964708325 |   |
| 9                                                             | 158 | protein complex disassembly                                         |                  |  |  |  |  |                   |   |
| GO:0000184                                                    |     | 2.98491410807608e-08                                                | 19.7920997920998 |  |  |  |  | 0.494083454432219 |   |
| 8                                                             | 119 | nuclear-transcribed mRNA catabolic process, nonsense-mediated decay |                  |  |  |  |  |                   |   |
| GO:0034623                                                    |     | 3.7730360310148e-08                                                 | 15.2149732620321 |  |  |  |  | 0.722441353539547 |   |
| 9                                                             | 174 | cellular macromolecular complex disassembly                         |                  |  |  |  |  |                   |   |
| GO:0032984                                                    |     | 4.8202817690404e-08                                                 | 14.7622837370242 |  |  |  |  | 0.743201162549305 |   |
| 9                                                             | 179 | macromolecular complex disassembly                                  |                  |  |  |  |  |                   |   |
| GO:0072594                                                    |     | 1.48031863913011e-07                                                | 12.8470588235294 |  |  |  |  | 0.84700020759809  |   |
| 9                                                             | 204 | establishment of protein localization to organelle                  |                  |  |  |  |  |                   |   |
| GO:0019080                                                    |     | 1.90639954577891e-07                                                | 15.3286713286713 |  |  |  |  | 0.626946232094665 |   |
| 8                                                             | 151 | viral genome expression                                             |                  |  |  |  |  |                   |   |
| GO:0019083                                                    |     | 1.90639954577891e-07                                                | 15.3286713286713 |  |  |  |  | 0.626946232094665 |   |
| 8                                                             | 151 | viral transcription                                                 |                  |  |  |  |  |                   |   |
| GO:0000956                                                    |     | 4.52078350387159e-07                                                | 13.5977066411849 |  |  |  |  | 0.70168154452979  |   |
| 8                                                             | 169 | nuclear-transcribed mRNA catabolic process                          |                  |  |  |  |  |                   |   |
| GO:0006402                                                    |     | 6.70898009617185e-07                                                | 12.8696832579186 |  |  |  |  | 0.739049200747353 |   |
| 8                                                             | 178 | mRNA catabolic process                                              |                  |  |  |  |  |                   |   |
| GO:0006401                                                    |     | 1.9446719025694e-06                                                 | 11.0847325263569 |  |  |  |  | 0.851152169400042 |   |
| 8                                                             | 205 | RNA catabolic process                                               |                  |  |  |  |  |                   |   |
| GO:0071845                                                    |     | 2.36772714650336e-06                                                | 9.05839572192513 |  |  |  |  | 1.1791571517542   | 9 |
| 284                                                           |     | cellular component disassembly at cellular level                    |                  |  |  |  |  |                   |   |
| GO:0022411                                                    |     | 2.65586737324971e-06                                                | 8.92599620493359 |  |  |  |  | 1.19576499896201  |   |
| 9                                                             | 288 | cellular component disassembly                                      |                  |  |  |  |  |                   |   |
| GO:0019058                                                    |     | 4.72285749714866e-06                                                | 9.77440496723008 |  |  |  |  | 0.959103176250778 |   |
| 8                                                             | 231 | viral infectious cycle                                              |                  |  |  |  |  |                   |   |
| GO:0022415                                                    |     | 1.12341186163975e-05                                                | 8.63186813186813 |  |  |  |  | 1.07951006850737  |   |
| 8                                                             | 260 | viral reproductive process                                          |                  |  |  |  |  |                   |   |
| Tissue: Artery_Tibial=>Skin_Sun_Exposed_Lower_leg             |     |                                                                     |                  |  |  |  |  |                   |   |
| SourceGene: MIR590(ENSG00000207741.1)                         |     |                                                                     |                  |  |  |  |  |                   |   |
| TargetGeneSet: MXRA8 DNAJC16 EYA3 CCDC23 RP4 CTSS UFC1 DNM3OS |     |                                                                     |                  |  |  |  |  |                   |   |
| GPR37L1 RAB4A IAH1 SPDYA UBC SP5 NIF3L1 EEF1B2 RPL15 CP       |     |                                                                     |                  |  |  |  |  |                   |   |
| TTC14 PPP1R2 RP11 FAM190A RPS3A SPCS3 BDP1 ADAMTS19 F13A1     |     |                                                                     |                  |  |  |  |  |                   |   |
| KLHDC3 EEF1A1 UBE2J1 BRD7P3 HEBP2 PSMB1 EEF1A1P6 SBDS NCF1B   |     |                                                                     |                  |  |  |  |  |                   |   |
| CCL26 RPS3AP26 LY96 CHMP4C DAPK1 RPS3AP5 SLC35G1 TSSC2 EIF3F  |     |                                                                     |                  |  |  |  |  |                   |   |
| RPS13 HPS5 LMO2 RP1 FTH1 RBM14 JRKL GAPDH DAZAP2 PFDN5        |     |                                                                     |                  |  |  |  |  |                   |   |
| APPL2 RPL6 TPT1 CCNB1IP1 TRDC EXD2 PAPLN TRPM7 PKM2           |     |                                                                     |                  |  |  |  |  |                   |   |
| NTAN1 RPS15A GOT2 CHTF8 CTD RNF167 CD68 RPL26 COX10 ZNHIT3    |     |                                                                     |                  |  |  |  |  |                   |   |
| RPL17 FTL RP3                                                 |     |                                                                     |                  |  |  |  |  |                   |   |
| GOBPID Pvalue OddsRatio ExpCount Count Size Term              |     |                                                                     |                  |  |  |  |  |                   |   |
| GO:0006414                                                    |     | 1.47673546624249e-11                                                | 30.0968421052632 |  |  |  |  | 0.435955989204899 |   |
| 10                                                            | 105 | translational elongation                                            |                  |  |  |  |  |                   |   |
| GO:0006614                                                    |     | 4.32985424798658e-10                                                | 26.2775735294118 |  |  |  |  | 0.435955989204899 |   |
| 9                                                             | 105 | SRP-dependent cotranslational protein targeting to membrane         |                  |  |  |  |  |                   |   |
| GO:0006613                                                    |     | 4.71651216055801e-10                                                | 26.0048514251061 |  |  |  |  | 0.440107951006851 |   |
| 9                                                             | 106 | cotranslational protein targeting to membrane                       |                  |  |  |  |  |                   |   |
| GO:0045047                                                    |     | 4.71651216055801e-10                                                | 26.0048514251061 |  |  |  |  | 0.440107951006851 |   |
| 9                                                             | 106 | protein targeting to ER                                             |                  |  |  |  |  |                   |   |
| GO:0072599                                                    |     | 4.71651216055801e-10                                                | 26.0048514251061 |  |  |  |  | 0.440107951006851 |   |
| 9                                                             | 106 | establishment of protein localization to endoplasmic reticulum      |                  |  |  |  |  |                   |   |
| GO:0070972                                                    |     | 1.23586942312019e-09                                                | 23.1225040474906 |  |  |  |  | 0.489931492630268 |   |
| 9                                                             | 118 | protein localization to endoplasmic reticulum                       |                  |  |  |  |  |                   |   |
| GO:0006415                                                    |     | 3.53907690704808e-09                                                | 26.5208526413346 |  |  |  |  | 0.377828523977579 |   |
| 8                                                             | 91  | translational termination                                           |                  |  |  |  |  |                   |   |

Stable4\_20PerPair

|                                                                       |                                                                     |                  |                     |
|-----------------------------------------------------------------------|---------------------------------------------------------------------|------------------|---------------------|
| GO:0006413                                                            | 1.16255483641681e-08                                                | 17.5828877005348 | 0.631098193896616   |
| 9 152                                                                 | translational initiation                                            |                  |                     |
| GO:0006612                                                            | 1.23127224219466e-08                                                | 17.4595588235294 | 0.635250155698568   |
| 9 153                                                                 | protein targeting to membrane                                       |                  |                     |
| GO:0043624                                                            | 1.23127224219466e-08                                                | 17.4595588235294 | 0.635250155698568   |
| 9 153                                                                 | cellular protein complex disassembly                                |                  |                     |
| GO:0043241                                                            | 1.63102119620009e-08                                                | 16.8677457560205 | 0.656009964708325   |
| 9 158                                                                 | protein complex disassembly                                         |                  |                     |
| GO:0000184                                                            | 2.98491410807608e-08                                                | 19.7920997920998 | 0.494083454432219   |
| 8 119                                                                 | nuclear-transcribed mRNA catabolic process, nonsense-mediated decay |                  |                     |
| GO:0034623                                                            | 3.7730360310148e-08                                                 | 15.2149732620321 | 0.722441353539547   |
| 9 174                                                                 | cellular macromolecular complex disassembly                         |                  |                     |
| GO:0032984                                                            | 4.8202817690404e-08                                                 | 14.7622837370242 | 0.743201162549305   |
| 9 179                                                                 | macromolecular complex disassembly                                  |                  |                     |
| GO:0072594                                                            | 1.48031863913011e-07                                                | 12.8470588235294 | 0.84700020759809    |
| 9 204                                                                 | establishment of protein localization to organelle                  |                  |                     |
| GO:0019080                                                            | 1.90639954577891e-07                                                | 15.3286713286713 | 0.626946232094665   |
| 8 151                                                                 | viral genome expression                                             |                  |                     |
| GO:0019083                                                            | 1.90639954577891e-07                                                | 15.3286713286713 | 0.626946232094665   |
| 8 151                                                                 | viral transcription                                                 |                  |                     |
| GO:0000956                                                            | 4.52078350387159e-07                                                | 13.5977066411849 | 0.70168154452979    |
| 8 169                                                                 | nuclear-transcribed mRNA catabolic process                          |                  |                     |
| GO:0006402                                                            | 6.70898009617185e-07                                                | 12.8696832579186 | 0.739049200747353   |
| 8 178                                                                 | mRNA catabolic process                                              |                  |                     |
| GO:0006401                                                            | 1.9446719025694e-06                                                 | 11.0847325263569 | 0.851152169400042   |
| 8 205                                                                 | RNA catabolic process                                               |                  |                     |
| GO:0071845                                                            | 2.36772714650336e-06                                                | 9.05839572192513 | 1.1791571517542 9   |
| 284                                                                   | cellular component disassembly at cellular level                    |                  |                     |
| GO:0022411                                                            | 2.65586737324971e-06                                                | 8.92599620493359 | 1.19576499896201    |
| 9 288                                                                 | cellular component disassembly                                      |                  |                     |
| GO:0019058                                                            | 4.72285749714866e-06                                                | 9.77440496723008 | 0.959103176250778   |
| 8 231                                                                 | viral infectious cycle                                              |                  |                     |
| GO:0022415                                                            | 1.12341186163975e-05                                                | 8.63186813186813 | 1.07951006850737    |
| 8 260                                                                 | viral reproductive process                                          |                  |                     |
| Tissue: Artery_Tibial=>Skin_Sun_Exposed_Lower_leg                     |                                                                     | Type: asymmetric |                     |
| SourceGene:                                                           | MYL6P3(ENSG00000227173.1)                                           |                  |                     |
| TargetGeneSet:                                                        | AURKAIP1 ARHGEF16 FBXO44 SIKE1 C2CD4D SLC19A2                       |                  |                     |
| SNRPG ARL5A FASTKD1 MTX2 ZC3H15 DNAJC19 NDUFS6 HMGCR RPL26L1 7SK FUT9 |                                                                     |                  |                     |
| RN5S216 ZFAND2A PSMG3 ACTB NDUFA4 POP7 RABL5 NDUFB2 COX6C C8orf55     |                                                                     |                  |                     |
| EXOSC4 ARHGAP39 AK1 FAM73B ZMYND19 CHCHD1 HECTD2 USMG5 TSSC4          |                                                                     |                  |                     |
| CTNND1 ESRRA EFHA1 RP11 CTD SNRPA1 FAM195A NARFL MRPS34 TCEB2         |                                                                     |                  |                     |
| SPIRE2 ITGAE MIS12 COASY LLGL2 SCARNA17 UQCR11 CSNK1G2 TJP3           |                                                                     |                  |                     |
| DDX39A NDUFB7 UQCRFS1 U2AF1L4 GNG8 EHD2 ATP5J MAPK1 CRYBB3 RPS19BP1   |                                                                     |                  |                     |
| GOBPID Pvalue OddsRatio ExpCount Count Size Term                      |                                                                     |                  |                     |
| GO:0045333                                                            | 5.35321403002086e-10                                                | 26.1020117862223 | 0.452010241505778   |
| 9 142                                                                 | cellular respiration                                                |                  |                     |
| GO:0022904                                                            | 5.97919403603125e-10                                                | 34.2511961722488 | 0.305584388623625   |
| 8 96                                                                  | respiratory electron transport chain                                |                  |                     |
| GO:0022900                                                            | 8.59309419206233e-09                                                | 23.8579782790309 | 0.426544875787143   |
| 8 134                                                                 | electron transport chain                                            |                  |                     |
| GO:0015980                                                            | 4.32947608406704e-07                                                | 11.514873934337  | 0.977233409452633 9 |
| 307                                                                   | energy derivation by oxidation of organic compounds                 |                  |                     |
| GO:0006120                                                            | 4.91239267601197e-06                                                | 42.7767857142857 | 0.114594145733859   |
| 4 36                                                                  | mitochondrial electron transport, NADH to ubiquinone                |                  |                     |
| GO:0006091                                                            | 6.71209554667473e-06                                                | 8.11933174224344 | 1.36239706594699    |
| 9 428                                                                 | generation of precursor metabolites and energy                      |                  |                     |
| GO:0042773                                                            | 1.44991914134624e-05                                                | 31.8095238095238 | 0.149609023596983   |
| 4 47                                                                  | ATP synthesis coupled electron transport                            |                  |                     |
| GO:0042775                                                            | 1.44991914134624e-05                                                | 31.8095238095238 | 0.149609023596983   |
| 4 47                                                                  | mitochondrial ATP synthesis coupled electron transport              |                  |                     |
| Tissue: Skin_Sun_Exposed_Lower_leg=>Artery_Tibial                     |                                                                     | Type: cluster    |                     |
| SourceGene:                                                           | PTPRU(ENSG0000060656.14)                                            |                  |                     |
| TargetGeneSet:                                                        | MRPL20 RPL22 ATPIF1 RPS8 UQCRH PRPF38A MAGOH RP4 RP11               |                  |                     |

Stable4\_20PerPair

| GO:ID      | Gene                                                                | Count            | Size | Term                 |
|------------|---------------------------------------------------------------------|------------------|------|----------------------|
| GO:0006414 | BCAS2 C1orf54 MRPS21 GAS5 SNRPE DNAJC27-AS1 HAAO TTC7A MPHOSPH10    | 52.7955665024631 | 631  | 0.537679053352709    |
| 18         | DGUOK DGUOK-AS1 RPL31 PPIG FKBP7 EEF1B2 LSM3 RPL15 LZTFL1           |                  |      |                      |
| GO:0006415 | RPL10AP6 C3orf15 METTL14 CEP44 BRIX1 MAP1B COX7C RFESD RPL15P3 NOL7 | 57.6460407776197 | 197  | 0.465988512905681    |
| 17         | RPS10 RPL10A ENPP5 C6orf225 MRPS12 C7orf50 TOMM7 RABL5 JHDM1D       |                  |      |                      |
| GO:0000184 | SSBP1 R3HCC1 RPS6 RPL7A EDF1 AGAP11 DPCD MRPL23 RPL27A C11orf58     | 45.4328147100424 | 424  | 0.609369593799737    |
| 18         | SVIP CELF1 TRMT112 EHD1 C11orf70 RPS25 DYRK4 C12orf57 EID3          |                  |      |                      |
| GO:0006614 | DIABLO MRPS31 ERH SLIRP LRRC49 PPCDC ANPEP SNHG9 HSDL1 ALDOC SDF2   | 48.4276315789474 | 474  | 0.537679053352709    |
| 17         | EIF1 RPL27 COIL RPL38 H3F3B TRIM47 CTD PTPRM RPL17 RPS15            |                  |      |                      |
| GO:0006613 | ZNF559 ZNF226 RPL18 ZNF548 ZNF274 RPS5 SLC27A5 RPL12P4 PDPDF PIGP   | 47.8801498127341 | 341  | 0.542799806241783    |
| 17         | SNRPD3 RP6 NAP1L2 RPL10                                             |                  |      |                      |
| GO:0045047 | GOBPID Pvalue OddsRatio ExpCount Count Size Term                    | 47.8801498127341 | 341  | 0.542799806241783    |
| 17         |                                                                     |                  |      |                      |
| GO:0072599 |                                                                     | 47.8801498127341 | 341  | 0.542799806241783    |
| 17         |                                                                     |                  |      |                      |
| GO:0000956 |                                                                     | 32.7652121212121 | 121  | 0.865407238253408    |
| 19         |                                                                     |                  |      |                      |
| GO:0070972 |                                                                     | 42.1559840194546 | 546  | 0.604248840910664    |
| 17         |                                                                     |                  |      |                      |
| GO:0006402 |                                                                     | 30.8910234419668 | 668  | 0.911494014255069    |
| 19         |                                                                     |                  |      |                      |
| GO:0006413 |                                                                     | 34.1649786780384 | 384  | 0.77835443913916     |
| 18         |                                                                     |                  |      |                      |
| GO:0043624 |                                                                     | 33.9095238095238 | 238  | 0.783475192028233    |
| 18         |                                                                     |                  |      |                      |
| GO:0043241 |                                                                     | 32.6869897959184 | 184  | 0.8090789564736 18   |
| 158        |                                                                     |                  |      |                      |
| GO:0006401 |                                                                     | 26.3566959921799 | 799  | 1.04975434226005     |
| 19         |                                                                     |                  |      |                      |
| GO:0034623 |                                                                     | 29.301510989011  | 911  | 0.891011002698775 18 |
| 174        |                                                                     |                  |      |                      |
| GO:0032984 |                                                                     | 28.3815439219166 | 166  | 0.916614767144142    |
| 18         |                                                                     |                  |      |                      |
| GO:0019080 |                                                                     | 31.7008379156847 | 847  | 0.773233686250086    |
| 17         |                                                                     |                  |      |                      |
| GO:0019083 |                                                                     | 31.7008379156847 | 847  | 0.773233686250086    |
| 17         |                                                                     |                  |      |                      |
| GO:0006612 |                                                                     | 31.2302631578947 | 947  | 0.783475192028233    |
| 17         |                                                                     |                  |      |                      |
| GO:0072594 |                                                                     | 24.5236175115207 | 207  | 1.04463358937098     |
| 18         |                                                                     |                  |      |                      |
| GO:0019058 |                                                                     | 19.738563698967  | 8967 | 1.18289391737596 17  |
| 231        |                                                                     |                  |      |                      |
| GO:0071845 |                                                                     | 17.0514232008593 | 593  | 1.45429382049685     |
| 18         |                                                                     |                  |      |                      |
| GO:0022411 |                                                                     | 16.7940476190476 | 476  | 1.47477683205315     |
| 18         |                                                                     |                  |      |                      |
| GO:0022415 |                                                                     | 17.3473395422713 | 713  | 1.33139575115909     |
| 17         |                                                                     |                  |      |                      |
| GO:0016032 |                                                                     | 10.35103926097   | 6097 | 2.30945955297211 18  |
| 451        |                                                                     |                  |      |                      |
| GO:0033365 |                                                                     | 9.83500784929356 | 9356 | 2.42211611653173     |
| 18         |                                                                     |                  |      |                      |



Stable4\_20PerPair

|                              |                                                        |                                                   |                    |      |
|------------------------------|--------------------------------------------------------|---------------------------------------------------|--------------------|------|
| GO:0006605                   | 1.86766659472713e-11                                   | 9.81273496240602                                  | 2.4272368694208    | 18   |
| 474                          | protein targeting                                      |                                                   |                    |      |
| GO:0022613                   | 1.80417516525998e-08                                   | 11.5556297285269                                  | 1.15216940004152   |      |
| 11                           | 225                                                    | ribonucleoprotein complex biogenesis              |                    |      |
| GO:0071843                   | 3.36134997539575e-08                                   | 10.8353522695628                                  | 1.22385994048855   |      |
| 11                           | 239                                                    | cellular component biogenesis at cellular level   |                    |      |
| GO:0042274                   | 1.83593780917654e-06                                   | 58.6244897959184                                  | 0.0921735520033216 |      |
| 4                            | 18                                                     | ribosomal small subunit biogenesis                |                    |      |
| GO:0008380                   | 5.47716940716468e-06                                   | 7.02076677316294                                  | 1.65400318317071   |      |
| 10                           | 323                                                    | RNA splicing                                      |                    |      |
| GO:0022618                   | 8.89474588802644e-06                                   | 14.1652346331791                                  | 0.486471524461975  |      |
| 6                            | 95                                                     | ribonucleoprotein complex assembly                |                    |      |
| GO:0042254                   | 1.08641351200467e-05                                   | 10.4735127180996                                  | 0.76299218047194   |      |
| 7                            | 149                                                    | ribosome biogenesis                               |                    |      |
| GO:0000375                   | 1.11299866289987e-05                                   | 8.54877129503995                                  | 1.07023735381634   |      |
| 8                            | 209                                                    | RNA splicing, via transesterification reactions   |                    |      |
| GO:0071826                   | 1.19563278429271e-05                                   | 13.407071339174                                   | 0.512075288907342  | 6    |
| 100                          | ribonucleoprotein complex subunit organization         |                                                   |                    |      |
| Tissue:                      | Artery_Tibial=>Skin_Sun_Exposed_Lower_leg              | Type:                                             | asymmetric         |      |
| SourceGene:                  | RP11-54D18.2(ENSG00000215237.5)                        |                                                   |                    |      |
| TargetGeneSet:               | KCNAB2 RP11 CDCA8 IQGAP3 CKAP2L HJURP CAND2 POC1A      |                                                   |                    |      |
| NCAPG                        | PALLD TTK CALD1 JPH1 DNAJB5 TPP1 VWA5A CDCA3 ESPL1     |                                                   |                    |      |
| KNTC1                        | LINC00427 CASC4 AURKB SPAG5 NDC80 KANK2 UBE2C C21orf58 |                                                   |                    |      |
| GOBPID                       | Pvalue OddsRatio ExpCount Count Size Term              |                                                   |                    |      |
| GO:0000280                   | 1.70149855514261e-11                                   | 37.6737967914438                                  | 0.508615320739049  |      |
| 10                           | 350                                                    | nuclear division                                  |                    |      |
| GO:0007067                   | 1.70149855514261e-11                                   | 37.6737967914438                                  | 0.508615320739049  |      |
| 10                           | 350                                                    | mitosis                                           |                    |      |
| GO:0000087                   | 2.2474302087212e-11                                    | 36.5714285714286                                  | 0.523147187045879  |      |
| 10                           | 360                                                    | M phase of mitotic cell cycle                     |                    |      |
| GO:0048285                   | 2.94510377886324e-11                                   | 35.530303030303                                   | 0.537679053352709  | 10   |
| 370                          | organelle fission                                      |                                                   |                    |      |
| GO:0007051                   | 1.20806651538886e-09                                   | 77.6                                              | 0.11625493045464   | 6 80 |
| spindle organization         |                                                        |                                                   |                    |      |
| GO:0051301                   | 5.5714723193295e-09                                    | 23.6800225733634                                  | 0.656840357068715  |      |
| 9                            | 452                                                    | cell division                                     |                    |      |
| GO:0007059                   | 3.57457495212115e-08                                   | 42.6746268656716                                  | 0.20344612829562   |      |
| 6                            | 140                                                    | chromosome segregation                            |                    |      |
| GO:0000070                   | 6.69163696986665e-07                                   | 75.2156862745098                                  | 0.0712061449034669 |      |
| 4                            | 49                                                     | mitotic sister chromatid segregation              |                    |      |
| GO:0000819                   | 8.52610879416797e-07                                   | 70.5                                              | 0.0755657047955159 | 4 52 |
| sister chromatid segregation |                                                        |                                                   |                    |      |
| GO:0000226                   | 1.68825441609451e-06                                   | 21.5467680608365                                  | 0.390907203653726  |      |
| 6                            | 269                                                    | microtubule cytoskeleton organization             |                    |      |
| GO:0008608                   | 1.7751076400133e-06                                    | 171.619047619048                                  | 0.024704172721611  |      |
| 3                            | 17                                                     | attachment of spindle microtubules to kinetochore |                    |      |
| GO:0051313                   | 2.52480397672365e-06                                   | 150.145833333333                                  | 0.027610545982977  |      |
| 3                            | 19                                                     | attachment of spindle microtubules to chromosome  |                    |      |
| GO:0051983                   | 5.2490984608998e-06                                    | 114.357142857143                                  | 0.0348764791363919 |      |
| 3                            | 24                                                     | regulation of chromosome segregation              |                    |      |
| GO:0000236                   | 6.1814169372142e-06                                    | 41.681917211329                                   | 0.123520863608055  | 4    |
| 85                           | mitotic prometaphase                                   |                                                   |                    |      |
| GO:0010948                   | 1.00368476133952e-05                                   | 36.6700767263427                                  | 0.139505916545568  |      |
| 4                            | 96                                                     | negative regulation of cell cycle process         |                    |      |
| GO:0007052                   | 1.40312171277173e-05                                   | 80                                                | 0.0479551588125389 | 3 33 |
| mitotic spindle organization |                                                        |                                                   |                    |      |
| GO:0007017                   | 1.49419123300948e-05                                   | 14.5147286821705                                  | 0.571102345858418  |      |
| 6                            | 393                                                    | microtubule-based process                         |                    |      |
| GO:0034453                   | 1.68003697599912e-05                                   | 74.9895833333333                                  | 0.0508615320739049 |      |
| 3                            | 35                                                     | microtubule anchoring                             |                    |      |
| Tissue:                      | Artery_Tibial=>Skin_Sun_Exposed_Lower_leg              | Type:                                             | asymmetric         |      |
| SourceGene:                  | RP11-800K23.2(ENSG00000237350.1)                       |                                                   |                    |      |
| TargetGeneSet:               | CTRC CELA2A CELA3B CELA3A AKIRIN1 TPI1P1 AMY2A RP11    |                                                   |                    |      |

Stable4\_20PerPair

| GO:ID      | Term                                                                    | Pvalue               | OddsRatio        | ExpCount            | Count             | Size | Term | PLG                |
|------------|-------------------------------------------------------------------------|----------------------|------------------|---------------------|-------------------|------|------|--------------------|
| GO:0007586 | digestion                                                               | 6.63892895159599e-16 |                  | 69.879769299024     | 0.256452840633866 |      |      | 11                 |
| GO:0044241 | lipid digestion                                                         | 5.24796719084791e-13 |                  | 343.047619047619    |                   |      |      | 0.0352916753165871 |
| GO:0010903 | negative regulation of very-low-density lipoprotein particle remodeling | 1.1899789965411e-08  | Inf              | 0.00705833506331742 | 3                 | 3    |      |                    |
| GO:0010901 | regulation of very-low-density lipoprotein particle remodeling          | 1.18615230345785e-07 | 697.5            | 0.0117638917721957  | 3                 | 5    |      |                    |
| GO:0035376 | sterol import                                                           | 2.36848744672549e-07 | 464.967741935484 |                     |                   |      |      | 0.0141166701266348 |
| GO:0035382 | sterol transmembrane transport                                          | 2.36848744672549e-07 | 464.967741935484 |                     |                   |      |      | 0.0141166701266348 |
| GO:0070508 | cholesterol import                                                      | 2.36848744672549e-07 | 464.967741935484 |                     |                   |      |      | 0.0141166701266348 |
| GO:0034384 | high-density lipoprotein particle clearance                             | 9.89971067513112e-07 | 232.435483870968 |                     |                   |      |      | 0.0211750051899523 |
| GO:0016042 | lipid catabolic process                                                 | 1.23887328377334e-06 | 15.6460204885737 |                     |                   |      |      | 0.569372361774272  |
| GO:0033700 | phospholipid efflux                                                     | 1.41196926651202e-06 | 199.216589861751 |                     |                   |      |      | 0.0235277835443914 |
| GO:0022617 | extracellular matrix disassembly                                        | 1.42607879604727e-06 | 59.9375          | 0.084700020759809   | 4                 | 36   |      |                    |
| GO:0050709 | negative regulation of protein secretion                                | 1.42607879604727e-06 | 59.9375          | 0.084700020759809   | 4                 | 36   |      |                    |
| GO:0034370 | triglyceride-rich lipoprotein particle remodeling                       | 1.93833465391372e-06 | 174.302419354839 |                     |                   |      |      | 0.0258805618988305 |
| GO:0034372 | very-low-density lipoprotein particle remodeling                        | 1.93833465391372e-06 | 174.302419354839 |                     |                   |      |      | 0.0258805618988305 |
| GO:0030299 | intestinal cholesterol absorption                                       | 2.5802890055433e-06  | 154.924731182796 |                     |                   |      |      | 0.0282333402532697 |
| GO:0008202 | steroid metabolic process                                               | 2.83207296481381e-06 | 13.7397697322791 |                     |                   |      |      | 0.644661269116324  |
| GO:0034377 | plasma lipoprotein particle assembly                                    | 3.34898032474373e-06 | 139.422580645161 |                     |                   |      |      | 0.0305861186077088 |
| GO:0065005 | protein-lipid complex assembly                                          | 3.34898032474373e-06 | 139.422580645161 |                     |                   |      |      | 0.0305861186077088 |
| GO:0034375 | high-density lipoprotein particle remodeling                            | 4.25548315102518e-06 | 126.739002932551 |                     |                   |      |      | 0.0329388969621479 |
| GO:0008203 | cholesterol metabolic process                                           | 5.94554982932334e-06 | 23.0583306477602 |                     |                   |      |      | 0.263511175697184  |
| GO:0050708 | regulation of protein secretion                                         | 7.06079297055722e-06 | 22.2211867039453 |                     |                   |      |      | 0.27292228911494   |
| GO:0043691 | reverse cholesterol transport                                           | 7.91151056259763e-06 | 99.5599078341014 |                     |                   |      |      | 0.0399972320254654 |
| GO:0050995 | negative regulation of lipid catabolic process                          | 7.91151056259763e-06 | 99.5599078341014 |                     |                   |      |      | 0.0399972320254654 |
| GO:0016125 | sterol metabolic process                                                | 7.99987331388902e-06 | 21.6318814277072 |                     |                   |      |      | 0.279980624178258  |
| GO:0015918 | sterol transport                                                        | 1.21199112232295e-05 | 33.5906432748538 |                     |                   |      |      | 0.143519479620787  |
| GO:0030301 | cholesterol transport                                                   | 1.21199112232295e-05 | 33.5906432748538 |                     |                   |      |      | 0.143519479620787  |
| GO:0050892 | intestinal absorption                                                   | 1.31995368287061e-05 | 81.9734345351044 |                     |                   |      |      | 0.0470555670887828 |
| GO:0018158 | protein oxidation                                                       | 1.60955815335276e-05 | 901              | 0.00705833506331742 | 2                 | 3    |      |                    |
| GO:0060620 | regulation of cholesterol import                                        | 1.60955815335276e-05 | 901              | 0.00705833506331742 | 2                 | 3    |      |                    |

Stable4\_20PerPair

GO:2000909 1.60955815335276e-05 901 0.00705833506331742 2 3  
regulation of sterol import  
Tissue: Skin\_Sun\_Exposed\_Lower\_leg=>Artery\_Tibial Type: asymmetric  
SourceGene: RP11-874J12.2(ENSG00000177337.2)  
TargetGeneSet: PARK7 PPCS MRPL9 RP11 COX5B WDSUB1 BRK1 LSM3 RP4  
ZMYND10 THOC7 NDUFB4 MRPS18C NDUFC1 C5orf42 CDK7 COX7C TTC1 PNPLA1  
MRPS18A OGFRL1 C6orf203 MRPS12 ZDHHC4 SKP1P1 COPS5 C10orf31  
USMG5 MRPL11 ACER3 SRGAP1 MRP63 MRPS31 DGKH HEATR4 GLRX5 TMEM121  
TMEM85 RPL9P25 MT1H COIL SUPT4H1 ATP5H COX6B1 FAM71E1 SNRPB2 FAM182A  
ATP5J PIGP SNRPD3 CBY1 NDUFA6  
GOBPID Pvalue OddsRatio ExpCount Count Size Term  
GO:0022904 9.28994304269143e-11 44.9090909090909 0.245796138675524  
8 96 respiratory electron transport chain  
GO:0022900 1.36360471479738e-09 31.2818828680898 0.343090443567919  
8 134 electron transport chain  
GO:0045333 2.16383598522514e-09 29.3978383942357 0.363573455124213  
8 142 cellular respiration  
GO:0015980 8.55415930448744e-07 13.022719409526 0.78603556847277 8  
307 energy derivation by oxidation of organic compounds  
GO:0006091 1.0064653866618e-05 9.19146141215107 1.09584111826171  
8 428 generation of precursor metabolites and energy  
Tissue: Skin\_Sun\_Exposed\_Lower\_leg=>Artery\_Tibial Type: cluster  
SourceGene: RP3-393E18.2(ENSG00000237927.1)  
TargetGeneSet: C1QA CD53 RP4 FCGR1A CTSS FCER1G FCGR2A PTPRC PLEK  
ITGA4 CCR1 EEF1A1P25 RP11 SFRP2 SLC1A3 GAPT YTHDC2 CD14 DOK3  
AIF1 CLEC5A REPIN1 SYK PIK3AP1 SLK SPI1 MS4A7 EFEMP2 KCNE3 BIN2  
LCP1 GPR65 ITGAM GFOD2 SLC16A11 PIK3R6 TEX2 CD300A IMPA2  
GNA15 VAV1 IFI30 LRRC25 TYROBP FPR3 LAIR1 HCK FAM207CP  
TRPM2 CTA CRYBB1 RAC2 CYBB GPR82  
GOBPID Pvalue OddsRatio ExpCount Count Size Term  
GO:0007229 2.00025953351907e-11 54.6590476190476 0.202338938481766  
8 68 integrin-mediated signaling pathway  
GO:0006909 5.58738652465578e-09 35.2682841068917 0.255899245726939  
7 86 phagocytosis  
GO:0030168 1.19105452995402e-08 18.0712669683258 0.645699259566812  
9 217 platelet activation  
GO:0007596 1.42457603637426e-08 11.0888092393469 1.48183516711646  
12 498 blood coagulation  
GO:0050900 4.66788626629229e-07 13.9055793991416 0.717113002560376  
8 241 leukocyte migration  
GO:0002252 1.59135061919244e-06 9.85169293181464 1.1485710331465 9  
386 immune effector process  
GO:0042590 3.5142206581175e-06 25.4871977240398 0.235070237353816  
5 79 antigen processing and presentation of exogenous peptide antigen via  
MHC class I  
GO:0002283 3.98256092190817e-06 135 0.0327312988720504 3 11  
neutrophil activation involved in immune response  
GO:0002478 4.48771252450626e-06 24.1734143049933 0.246972527852744  
5 83 antigen processing and presentation of exogenous peptide antigen  
GO:0019884 5.04778463581109e-06 23.5657894736842 0.252923673102207  
5 85 antigen processing and presentation of exogenous antigen  
GO:0050867 6.18133996269474e-06 11.8293991416309 0.714137429935645  
7 240 positive regulation of cell activation  
GO:0002474 1.067374454247e-05 20.0363941769317 0.294581689848453  
5 99 antigen processing and presentation of peptide antigen via MHC class  
I  
GO:0006911 1.08913549185673e-05 89.975 0.0446335893709778 3 15  
phagocytosis, engulfment  
GO:0010324 1.62097344171137e-05 77.1107142857143 0.0505847346204415  
3 17 membrane invagination  
GO:0048002 1.6309931321023e-05 18.2741440981093 0.32136184347104  
5 108 antigen processing and presentation of peptide antigen  
Tissue: Skin\_Sun\_Exposed\_Lower\_leg=>Artery\_Tibial Type: asymmetric

Stable4\_20PerPair

| SourceGene:    | SLC26A11(ENSG00000181045.10)              |                      |                  |                  |           |                                                                     |                   |            |         |  |  |
|----------------|-------------------------------------------|----------------------|------------------|------------------|-----------|---------------------------------------------------------------------|-------------------|------------|---------|--|--|
| TargetGeneSet: | RP3                                       | ZNF362               | INSL3            | TNNI1            | KDM3A     | SMYD1                                                               | NEB               | KBTBD10    | PDK1    |  |  |
| OXSM           | SLC22A14                                  | WNT5A                | LMOD3            | SPINK1           | HIST1H2BH |                                                                     | ADCYAP1R1         |            | AVL9    |  |  |
| FZD9           | RELN                                      | LRRN3                | RP11             | DLGAP2           | ZNF395    | C9orf95                                                             | IPMK              | SLC35G1    | NRAP    |  |  |
| BNIP3          | ADM                                       | TULP3                | CD27             | MYF6             | MYL2      | ZMYM5                                                               | MYH7              | GRIN2A     | FA2H    |  |  |
| SMTNL2         | JMJD6                                     | TGIF1                | ANGPTL4          | MYBPC2           | TNNC2     | PVALB                                                               | MAFF              | FAM155B    |         |  |  |
| GOBPID         | Pvalue                                    | OddsRatio            | ExpCount         | Count            | Size      | Term                                                                |                   |            |         |  |  |
| GO:0030049     | 6                                         | 9.271688710528e-10   | 76.8877005347594 | 76.8877005347594 | 6         | muscle filament sliding                                             | 0.107951006850737 |            |         |  |  |
| GO:0033275     | 6                                         | 9.271688710528e-10   | 76.8877005347594 | 76.8877005347594 | 6         | actin-myosin filament sliding                                       | 0.107951006850737 |            |         |  |  |
| GO:0070252     | 6                                         | 1.48173203631027e-09 | 70.4656862745098 | 70.4656862745098 | 6         | actin-mediated cell contraction                                     | 0.11625493045464  |            |         |  |  |
| GO:0030048     | 6                                         | 1.22971324712985e-08 | 47.8068812430633 | 47.8068812430633 | 6         | actin filament-based movement                                       | 0.163310497543423 |            |         |  |  |
| GO:0006936     | 8                                         | 2.42527363012568e-07 | 15.3463203463203 | 15.3463203463203 | 8         | muscle contraction                                                  | 0.661545913777593 |            |         |  |  |
| GO:0060415     | 5                                         | 2.42552850360207e-07 | 45.6063492063492 | 45.6063492063492 | 5         | muscle tissue morphogenesis                                         | 0.138398726731714 |            |         |  |  |
| GO:0048644     | 5                                         | 4.32016652732376e-07 | 40.2240896358543 | 40.2240896358543 | 5         | muscle organ morphogenesis                                          | 0.15500657393952  |            |         |  |  |
| GO:0003012     | 8                                         | 5.4774389387088e-07  | 13.7141472868217 | 13.7141472868217 | 8         | muscle system process                                               | 0.736281226212719 |            |         |  |  |
| GO:0006941     | 5                                         | 1.87847787915929e-06 | 29.2673469387755 | 29.2673469387755 | 5         | striated muscle contraction                                         | 0.207598090097571 |            |         |  |  |
| GO:0007507     | 8                                         | 3.59997407179999e-06 | 10.5366766467066 | 10.5366766467066 | 8         | heart development                                                   | 0.946647290844924 |            |         |  |  |
| GO:0055008     | 4                                         | 6.90807921637003e-06 | 38.9430894308943 | 38.9430894308943 | 4         | cardiac muscle tissue morphogenesis                                 | 0.124558854058543 |            |         |  |  |
| GO:0048729     | 8                                         | 1.22150628670457e-05 | 8.84785353535353 | 8.84785353535353 | 8         | tissue morphogenesis                                                | 1.11826171199225  |            |         |  |  |
| Tissue:        | Artery_Tibial=>Skin_Sun_Exposed_Lower_leg |                      |                  |                  |           |                                                                     | Type:             | asymmetric |         |  |  |
| SourceGene:    | TBL2(ENSG00000106638.9)                   |                      |                  |                  |           |                                                                     |                   |            |         |  |  |
| TargetGeneSet: | CPSF3L                                    | CAMK2N1              | HTR1D            | RPL11            | ATPIF1    | EIF2C4                                                              | RPS8              | RP4        | RP11    |  |  |
| RBM8A          | MRPL55                                    | GUK1                 | RPS7             | UBC              | WBP1      | TXNDC9                                                              | RPL31             | UGGT1      | EEF1B2  |  |  |
| CXCR2          | CRBN                                      | TTLL3                | EXOSC7           | THOC7            | C3orf70   | RPL34                                                               | UBE2B             | CAMLG      | FAM193B |  |  |
| RWDD1          | MAP3K4                                    | BRAT1                | RALA             | WBSCR17          | HIPK2     | OR9A3P                                                              | COPS5             | CDC37L1    | RPS6    |  |  |
| UBAC1          | ANAPC2                                    | TET1                 | RPS24            | LDB1             | HRAS      | C11orf35                                                            |                   | FBXO3      | CCS     |  |  |
| RPS25          | CLEC2B                                    | HMGB1                | N4BP2L1          | COMMD6           | NDFIP2    | ABCD4                                                               | IFT43             | PLDN       | SHC4    |  |  |
| SPSB3          | NUPR1                                     | FUK                  | ZFH3             | NEURL4           | RPL26     | UTP18                                                               | FN3KRP            | C18orf21   |         |  |  |
| HAUS1          | RPL17                                     | LSM7                 | MLL4             | ARHGAP33         |           | ZNF224                                                              | ARFGAP3           | SLC2A4RG   |         |  |  |
| UCKL1          | BTG3                                      | PISD                 | AKAP17A          | RP3              | CXorf56   | GPC4                                                                |                   |            |         |  |  |
| GOBPID         | Pvalue                                    | OddsRatio            | ExpCount         | Count            | Size      | Term                                                                |                   |            |         |  |  |
| GO:0006402     | 15                                        | 2.48818502035394e-15 | 25.1669419537518 | 25.1669419537518 | 15        | mRNA catabolic process                                              | 0.825271607501211 |            |         |  |  |
| GO:0006401     | 15                                        | 2.04842705634507e-14 | 21.5495951417004 | 21.5495951417004 | 15        | RNA catabolic process                                               | 0.950453255830046 |            |         |  |  |
| GO:0000956     | 14                                        | 2.97119394913301e-14 | 24.2490566037736 | 24.2490566037736 | 14        | nuclear-transcribed mRNA catabolic process                          | 0.783544391391599 |            |         |  |  |
| GO:0006414     | 12                                        | 4.89025394882655e-14 | 33.5272727272727 | 33.5272727272727 | 12        | translational elongation                                            | 0.486817521278804 |            |         |  |  |
| GO:0006614     | 12                                        | 4.89025394882655e-14 | 33.5272727272727 | 33.5272727272727 | 12        | SRP-dependent cotranslational protein targeting to membrane         | 0.486817521278804 |            |         |  |  |
| GO:0006613     | 12                                        | 5.49507456161732e-14 | 33.1682785299807 | 33.1682785299807 | 12        | cotranslational protein targeting to membrane                       | 0.491453878624317 |            |         |  |  |
| GO:0045047     | 12                                        | 5.49507456161732e-14 | 33.1682785299807 | 33.1682785299807 | 12        | protein targeting to ER                                             | 0.491453878624317 |            |         |  |  |
| GO:0072599     | 12                                        | 5.49507456161732e-14 | 33.1682785299807 | 33.1682785299807 | 12        | establishment of protein localization to endoplasmic reticulum      | 0.491453878624317 |            |         |  |  |
| GO:0070972     | 118                                       | 2.0417290081453e-13  | 29.388679245283  | 29.388679245283  | 118       | protein localization to endoplasmic reticulum                       | 0.547090166770466 | 12         |         |  |  |
| GO:0000184     | 12                                        | 2.26268763505438e-13 | 29.1119796091759 | 29.1119796091759 | 12        | nuclear-transcribed mRNA catabolic process, nonsense-mediated decay | 0.551726524115978 |            |         |  |  |

Stable4\_20PerPair

|                                                             |                                                    |                  |                    |        |       |                   |           |          |          |
|-------------------------------------------------------------|----------------------------------------------------|------------------|--------------------|--------|-------|-------------------|-----------|----------|----------|
| GO:0006415                                                  | 3.19175769529315e-13                               | 35.1214285714286 | 0.42190851844163   |        |       |                   |           |          |          |
| 11 91                                                       | translational termination                          |                  |                    |        |       |                   |           |          |          |
| GO:0006413                                                  | 4.31463379196058e-12                               | 22.1984415584416 | 0.704726316517888  |        |       |                   |           |          |          |
| 12 152                                                      | translational initiation                           |                  |                    |        |       |                   |           |          |          |
| GO:0006612                                                  | 4.66527642874167e-12                               | 22.0394584139265 | 0.7093626738634    | 12     |       |                   |           |          |          |
| 153                                                         | protein targeting to membrane                      |                  |                    |        |       |                   |           |          |          |
| GO:0019080                                                  | 8.73681239153119e-11                               | 19.9852040816327 | 0.700089959172376  |        |       |                   |           |          |          |
| 11 151                                                      | viral genome expression                            |                  |                    |        |       |                   |           |          |          |
| GO:0019083                                                  | 8.73681239153119e-11                               | 19.9852040816327 | 0.700089959172376  |        |       |                   |           |          |          |
| 11 151                                                      | viral transcription                                |                  |                    |        |       |                   |           |          |          |
| GO:0043624                                                  | 1.00755954318332e-10                               | 19.7009557344064 | 0.7093626738634    | 11     |       |                   |           |          |          |
| 153                                                         | cellular protein complex disassembly               |                  |                    |        |       |                   |           |          |          |
| GO:0072594                                                  | 1.37585044045365e-10                               | 16.1272727272727 | 0.945816898484534  |        |       |                   |           |          |          |
| 12 204                                                      | establishment of protein localization to organelle |                  |                    |        |       |                   |           |          |          |
| GO:0043241                                                  | 1.42656683439314e-10                               | 19.0241739552964 | 0.732544460590963  |        |       |                   |           |          |          |
| 11 158                                                      | protein complex disassembly                        |                  |                    |        |       |                   |           |          |          |
| GO:0022415                                                  | 1.64029906771953e-10                               | 13.7787524366472 | 1.20545290983323   |        |       |                   |           |          |          |
| 13 260                                                      | viral reproductive process                         |                  |                    |        |       |                   |           |          |          |
| GO:0034623                                                  | 4.02469233199967e-10                               | 17.1374890446976 | 0.806726178119161  |        |       |                   |           |          |          |
| 11 174                                                      | cellular macromolecular complex disassembly        |                  |                    |        |       |                   |           |          |          |
| GO:0032984                                                  | 5.44861896223371e-10                               | 16.6215986394558 | 0.829907964846723  |        |       |                   |           |          |          |
| 11 179                                                      | macromolecular complex disassembly                 |                  |                    |        |       |                   |           |          |          |
| GO:0071845                                                  | 6.02781333295069e-09                               | 11.3197860962567 | 1.31672548612553   |        |       |                   |           |          |          |
| 12 284                                                      | cellular component disassembly at cellular level   |                  |                    |        |       |                   |           |          |          |
| GO:0022411                                                  | 7.0518130646347e-09                                | 11.1525691699605 | 1.33527091550758   |        |       |                   |           |          |          |
| 12 288                                                      | cellular component disassembly                     |                  |                    |        |       |                   |           |          |          |
| GO:0019058                                                  | 8.03056910643846e-09                               | 12.6464285714286 | 1.07099854681337   |        |       |                   |           |          |          |
| 11 231                                                      | viral infectious cycle                             |                  |                    |        |       |                   |           |          |          |
| GO:0042274                                                  | 1.50494185231174e-08                               | 89.1501240694789 | 0.0834544322192236 |        |       |                   |           |          |          |
| 5 18                                                        | ribosomal small subunit biogenesis                 |                  |                    |        |       |                   |           |          |          |
| GO:0006364                                                  | 2.51599543897936e-08                               | 20.180790960452  | 0.482181163933292  | 8      |       |                   |           |          |          |
| 104                                                         | rRNA processing                                    |                  |                    |        |       |                   |           |          |          |
| GO:0042254                                                  | 2.65558944957181e-08                               | 15.787684729064  | 0.690817244481351  | 9      |       |                   |           |          |          |
| 149                                                         | ribosome biogenesis                                |                  |                    |        |       |                   |           |          |          |
| GO:0016072                                                  | 3.91547118036927e-08                               | 18.9857095380525 | 0.509999308006366  |        |       |                   |           |          |          |
| 8 110                                                       | rRNA metabolic process                             |                  |                    |        |       |                   |           |          |          |
| GO:0022613                                                  | 7.8293624186879e-08                                | 11.561811505508  | 1.04318040274029   | 10     |       |                   |           |          |          |
| 225                                                         | ribonucleoprotein complex biogenesis               |                  |                    |        |       |                   |           |          |          |
| GO:0016032                                                  | 1.22484734410462e-07                               | 7.66522915609674 | 2.0909971628261    | 13     |       |                   |           |          |          |
| 451                                                         | viral reproduction                                 |                  |                    |        |       |                   |           |          |          |
| GO:0071843                                                  | 1.37753688339582e-07                               | 10.844250363901  | 1.10808940557747   | 10     |       |                   |           |          |          |
| 239                                                         | cellular component biogenesis at cellular level    |                  |                    |        |       |                   |           |          |          |
| GO:0033365                                                  | 1.53598385943145e-06                               | 6.58946953263656 | 2.19299702442738   |        |       |                   |           |          |          |
| 12 473                                                      | protein localization to organelle                  |                  |                    |        |       |                   |           |          |          |
| GO:0006605                                                  | 1.57023409742074e-06                               | 6.57473435655254 | 2.19763338177289   |        |       |                   |           |          |          |
| 12 474                                                      | protein targeting                                  |                  |                    |        |       |                   |           |          |          |
| GO:0034470                                                  | 3.79294432966074e-06                               | 10.0225988700565 | 0.927271469102484  |        |       |                   |           |          |          |
| 8 200                                                       | ncRNA processing                                   |                  |                    |        |       |                   |           |          |          |
| Tissue: Artery_Tibial=>Skin_Sun_Exposed_Lower_leg           |                                                    | Type:            | asymmetric         |        |       |                   |           |          |          |
| SourceGene: TYRP1(ENSG00000107165.7)                        |                                                    |                  |                    |        |       |                   |           |          |          |
| TargetGeneSet: CTNNBIP1 RPL11 MEAF6 YBX1 RPS8 PSMD4 B3GALT2 |                                                    |                  |                    |        |       |                   |           |          |          |
| RAB4A                                                       | TOMM20                                             | RPS7             | UBC                | KCMF1  | RPL31 | MZT2A             | BBS5      | EIF2S2P4 |          |
| EEF1B2                                                      | RPL15                                              | RPL24            | GRK7               | EIF2S1 | NCBP2 | RPL35A            | RP11      | CTD      | EEF1A1   |
| MRPS12                                                      | ZFAND2A                                            | POP7             | DNAJC2             | CHMP4C | MTDH  | RPS6              | SURF2     | CCNY     | RPS13    |
| KRT8P26                                                     | RPS25                                              | METAP2           | RPL6               | MRP63  | GTF3A | TPT1              | C14orf166 |          | MOAP1    |
| HAUS2                                                       | RPS3AP6                                            | BTBD1            | AXIN1              | GFER   | PALB2 | EXOSC6            | TAF1C     | IFT20    | RPS7P1   |
| RPL17                                                       | RPL19                                              | RPL27            | HOXB4              | RP13   | NAA20 | EIF2S2            | C20orf24  |          | EEF1B2P3 |
| GOBPID                                                      | Pvalue                                             | OddsRatio        | ExpCount           | Count  | Size  | Term              |           |          |          |
| GO:0006414                                                  | 8.00011629816487e-26                               | 80.0130475302889 |                    |        |       | 0.399626323437824 |           |          |          |
| 18 105                                                      | translational elongation                           |                  |                    |        |       |                   |           |          |          |
| GO:0006413                                                  | 1.6705875399692e-24                                | 56.5992063492063 |                    |        |       | 0.578506677738565 |           |          |          |
| 19 152                                                      | translational initiation                           |                  |                    |        |       |                   |           |          |          |
| GO:0006415                                                  | 3.73230934449678e-23                               | 78.337094017094  | 0.346342813646114  |        |       |                   |           |          | 16       |

STable4\_20PerPair

|            |                                               |                                                                     |                   |                    |    |
|------------|-----------------------------------------------|---------------------------------------------------------------------|-------------------|--------------------|----|
| 91         | translational termination                     |                                                                     |                   |                    |    |
| GO:0000184 | 5.92378821595437e-23                          | 62.6929824561403                                                    |                   | 0.452909833229534  |    |
| 17         | 119                                           | nuclear-transcribed mRNA catabolic process, nonsense-mediated decay |                   |                    |    |
| GO:0006614 | 4.32864406170196e-22                          | 65.9498703543647                                                    |                   | 0.399626323437824  |    |
| 16         | 105                                           | SRP-dependent cotranslational protein targeting to membrane         |                   |                    |    |
| GO:0006613 | 5.0851515085895e-22                           | 65.2125356125356                                                    |                   | 0.403432288422946  |    |
| 16         | 106                                           | cotranslational protein targeting to membrane                       |                   |                    |    |
| GO:0045047 | 5.0851515085895e-22                           | 65.2125356125356                                                    |                   | 0.403432288422946  |    |
| 16         | 106                                           | protein targeting to ER                                             |                   |                    |    |
| GO:0072599 | 5.0851515085895e-22                           | 65.2125356125356                                                    |                   | 0.403432288422946  |    |
| 16         | 106                                           | establishment of protein localization to endoplasmic reticulum      |                   |                    |    |
| GO:0000956 | 6.59679309573166e-22                          | 45.8940397350993                                                    |                   | 0.643208082485641  |    |
| 18         | 169                                           | nuclear-transcribed mRNA catabolic process                          |                   |                    |    |
| GO:0006402 | 1.72451866100566e-21                          | 43.2851351351351                                                    |                   | 0.67746176735174   |    |
| 18         | 178                                           | mRNA catabolic process                                              |                   |                    |    |
| GO:0070972 | 3.11421270420208e-21                          | 57.492207139266                                                     | 0.449103868244412 |                    | 16 |
| 118        | protein localization to endoplasmic reticulum |                                                                     |                   |                    |    |
| GO:0019080 | 4.08181428053345e-21                          | 47.614689709348                                                     | 0.574700712753443 |                    | 17 |
| 151        | viral genome expression                       |                                                                     |                   |                    |    |
| GO:0019083 | 4.08181428053345e-21                          | 47.614689709348                                                     | 0.574700712753443 |                    | 17 |
| 151        | viral transcription                           |                                                                     |                   |                    |    |
| GO:0072594 | 2.1155673178974e-20                           | 37.1665213600697                                                    |                   | 0.776416856964916  |    |
| 18         | 204                                           | establishment of protein localization to organelle                  |                   |                    |    |
| GO:0006401 | 2.31350997401875e-20                          | 36.9651683769331                                                    |                   | 0.780222821950038  |    |
| 18         | 205                                           | RNA catabolic process                                               |                   |                    |    |
| GO:0006612 | 2.33863422759867e-19                          | 42.6996069623807                                                    |                   | 0.582312642723687  |    |
| 16         | 153                                           | protein targeting to membrane                                       |                   |                    |    |
| GO:0043624 | 2.33863422759867e-19                          | 42.6996069623807                                                    |                   | 0.582312642723687  |    |
| 16         | 153                                           | cellular protein complex disassembly                                |                   |                    |    |
| GO:0043241 | 3.96637940556713e-19                          | 41.1816540267245                                                    |                   | 0.601342467649298  |    |
| 16         | 158                                           | protein complex disassembly                                         |                   |                    |    |
| GO:0034623 | 1.91952148295049e-18                          | 36.9698149951315                                                    |                   | 0.662237907411252  |    |
| 16         | 174                                           | cellular macromolecular complex disassembly                         |                   |                    |    |
| GO:0032984 | 3.0434441731485e-18                           | 35.823187037911                                                     | 0.681267732336863 |                    | 16 |
| 179        | macromolecular complex disassembly            |                                                                     |                   |                    |    |
| GO:0019058 | 6.40484091892523e-18                          | 29.6475651746188                                                    |                   | 0.879177911563214  |    |
| 17         | 231                                           | viral infectious cycle                                              |                   |                    |    |
| GO:0022415 | 4.76156532692629e-17                          | 26.0559887372753                                                    |                   | 0.989550896131756  |    |
| 17         | 260                                           | viral reproductive process                                          |                   |                    |    |
| GO:0071845 | 2.10519686334829e-16                          | 23.6736644983245                                                    |                   | 1.08089405577469   |    |
| 17         | 284                                           | cellular component disassembly at cellular level                    |                   |                    |    |
| GO:0022411 | 2.66173745686471e-16                          | 23.3176344921344                                                    |                   | 1.09611791571518   |    |
| 17         | 288                                           | cellular component disassembly                                      |                   |                    |    |
| GO:0033365 | 4.01932061762941e-15                          | 16.2076603034753                                                    |                   | 1.80022143796277   |    |
| 19         | 473                                           | protein localization to organelle                                   |                   |                    |    |
| GO:0006605 | 4.17696218883589e-15                          | 16.1708791208791                                                    |                   | 1.80402740294789   |    |
| 19         | 474                                           | protein targeting                                                   |                   |                    |    |
| GO:0016032 | 2.80398946136548e-14                          | 15.687784782473                                                     | 1.71649020829008  |                    | 18 |
| 451        | viral reproduction                            |                                                                     |                   |                    |    |
| GO:0022613 | 1.56445492953574e-07                          | 12.8442028985507                                                    |                   | 0.856342121652481  |    |
| 9          | 225                                           | ribonucleoprotein complex biogenesis                                |                   |                    |    |
| GO:0071843 | 2.61152742793885e-07                          | 12.0504725897921                                                    |                   | 0.909625631444191  |    |
| 9          | 239                                           | cellular component biogenesis at cellular level                     |                   |                    |    |
| GO:0042274 | 5.52277506078789e-07                          | 80.5714285714286                                                    |                   | 0.0685073697321985 |    |
| 4          | 18                                            | ribosomal small subunit biogenesis                                  |                   |                    |    |
| GO:0042254 | 1.44249463700459e-06                          | 14.6387910798122                                                    |                   | 0.567088782783198  |    |
| 7          | 149                                           | ribosome biogenesis                                                 |                   |                    |    |
| GO:0006364 | 2.61706669591879e-06                          | 17.8650562265723                                                    |                   | 0.395820358452702  |    |
| 6          | 104                                           | rRNA processing                                                     |                   |                    |    |
| GO:0016072 | 3.63014331363447e-06                          | 16.8273155416013                                                    |                   | 0.418656148363435  |    |
| 6          | 110                                           | rRNA metabolic process                                              |                   |                    |    |
| GO:0034470 | 1.01251906931225e-05                          | 10.7319732297064                                                    |                   | 0.761192997024427  |    |
| 7          | 200                                           | ncRNA processing                                                    |                   |                    |    |

Stable4\_20PerPair

|                  |                                                                     |                  |                         |
|------------------|---------------------------------------------------------------------|------------------|-------------------------|
| GO:0034660       | 1.13038814308804e-05                                                | 8.67593517167217 | 1.08470002075981        |
| 8 285            | ncRNA metabolic process                                             |                  |                         |
| Tissue: Skin_Sun | Exposed_Lower_leg=>Artery_Tibial                                    | Type: asymmetric |                         |
| SourceGene:      | ZNF826P(ENSG00000231205.6)                                          |                  |                         |
| TargetGeneSet:   | RPL22 CAMTA1-IT1 RPS8 RP11 RPL31 MAP4K4 MZT2A                       |                  |                         |
| MRPS18B LY6G5C   | MRPS12 PMS2P4 RPS6 RPS3AP5 RPS25 KLHDC5 HOXC4 UBC                   |                  |                         |
| MCF2L ARHGEF40   | RPS5 RPL12P4 ASB9                                                   |                  |                         |
| GOBPID           | Pvalue OddsRatio ExpCount Count Size Term                           |                  |                         |
| GO:0006415       | 1.91762679497595e-12                                                | 149.5            | 0.0944571309943949 7 91 |
|                  | translational termination                                           |                  |                         |
| GO:0006414       | 5.35581710072394e-12                                                | 128.017857142857 | 0.108988997301225       |
| 7 105            | translational elongation                                            |                  |                         |
| GO:0006614       | 5.35581710072394e-12                                                | 128.017857142857 | 0.108988997301225       |
| 7 105            | SRP-dependent cotranslational protein targeting to membrane         |                  |                         |
| GO:0006613       | 5.73171739753588e-12                                                | 126.715909090909 | 0.110026987751713       |
| 7 106            | cotranslational protein targeting to membrane                       |                  |                         |
| GO:0045047       | 5.73171739753588e-12                                                | 126.715909090909 | 0.110026987751713       |
| 7 106            | protein targeting to ER                                             |                  |                         |
| GO:0072599       | 5.73171739753588e-12                                                | 126.715909090909 | 0.110026987751713       |
| 7 106            | establishment of protein localization to endoplasmic reticulum      |                  |                         |
| GO:0070972       | 1.23276970424851e-11                                                | 112.922297297297 | 0.122482873157567       |
| 7 118            | protein localization to endoplasmic reticulum                       |                  |                         |
| GO:0000184       | 1.30917922215508e-11                                                | 111.90625        | 0.123520863608055 7     |
| 119              | nuclear-transcribed mRNA catabolic process, nonsense-mediated decay |                  |                         |
| GO:0019080       | 7.09604372233481e-11                                                | 86.84375         | 0.156736558023666 7     |
| 151              | viral genome expression                                             |                  |                         |
| GO:0019083       | 7.09604372233481e-11                                                | 86.84375         | 0.156736558023666 7     |
| 151              | viral transcription                                                 |                  |                         |
| GO:0006413       | 7.43497825634392e-11                                                | 86.2387931034483 | 0.157774548474154       |
| 7 152            | translational initiation                                            |                  |                         |
| GO:0006612       | 7.78764418694332e-11                                                | 85.6421232876712 | 0.158812538924642       |
| 7 153            | protein targeting to membrane                                       |                  |                         |
| GO:0043624       | 7.78764418694332e-11                                                | 85.6421232876712 | 0.158812538924642       |
| 7 153            | cellular protein complex disassembly                                |                  |                         |
| GO:0043241       | 9.77339101656688e-11                                                | 82.7773178807947 | 0.164002491177081       |
| 7 158            | protein complex disassembly                                         |                  |                         |
| GO:0000956       | 1.57100332169022e-10                                                | 77.0972222222222 | 0.175420386132448       |
| 7 169            | nuclear-transcribed mRNA catabolic process                          |                  |                         |
| GO:0034623       | 1.92905229329879e-10                                                | 74.7627245508982 | 0.180610338384887       |
| 7 174            | cellular macromolecular complex disassembly                         |                  |                         |
| GO:0006402       | 2.26358693985382e-10                                                | 72.9934210526316 | 0.184762300186838       |
| 7 178            | mRNA catabolic process                                              |                  |                         |
| GO:0032984       | 2.35455743001986e-10                                                | 72.5639534883721 | 0.185800290637326       |
| 7 179            | macromolecular complex disassembly                                  |                  |                         |
| GO:0072594       | 5.89417708112577e-10                                                | 63.2442893401015 | 0.211750051899523       |
| 7 204            | establishment of protein localization to organelle                  |                  |                         |
| GO:0006401       | 6.09956796824973e-10                                                | 62.9204545454545 | 0.21278804235001        |
| 7 205            | RNA catabolic process                                               |                  |                         |
| GO:0019058       | 1.40565670508218e-09                                                | 55.515625        | 0.239775794062695 7     |
| 231              | viral infectious cycle                                              |                  |                         |
| GO:0022415       | 3.20411362178548e-09                                                | 49.0518774703557 | 0.269877517126842       |
| 7 260            | viral reproductive process                                          |                  |                         |
| GO:0071845       | 5.91575276257488e-09                                                | 44.726083032491  | 0.294789287938551 7     |
| 284              | cellular component disassembly at cellular level                    |                  |                         |
| GO:0022411       | 6.51819085454377e-09                                                | 44.0769572953737 | 0.298941249740502       |
| 7 288            | cellular component disassembly                                      |                  |                         |
| GO:0016032       | 1.42629435581143e-07                                                | 27.5743243243243 | 0.468133693170023       |
| 7 451            | viral reproduction                                                  |                  |                         |
| GO:0033365       | 1.97334860926187e-07                                                | 26.2312231759657 | 0.490969483080756       |
| 7 473            | protein localization to organelle                                   |                  |                         |
| GO:0006605       | 2.0019322032261e-07                                                 | 26.1731798715203 | 0.492007473531244       |
| 7 474            | protein targeting                                                   |                  |                         |
| GO:0042274       | 7.31458391870453e-07                                                | 240.35           | 0.0186838281087814 3 18 |

Stable4\_20PerPair

| GO:ID                              | Count                       | Size                | Term                                                   |
|------------------------------------|-----------------------------|---------------------|--------------------------------------------------------|
| ribosomal small subunit biogenesis | 555                         | 0.00622794270292713 |                                                        |
| GO:000028                          | 2                           | 6                   | ribosomal small subunit assembly                       |
| Tissue: whole_Blood=>Artery_Tibial |                             |                     | Type: cluster                                          |
| SourceGene:                        | C6orf226(ENSG00000221821.2) |                     |                                                        |
| TargetGeneSet:                     | CTNNBIP1                    | PPCS                | HBXIP                                                  |
| TATDN3                             | LYST-IT1                    | C2orf28             | MORN2                                                  |
| MYEOV2                             | GLYCTK                      | SPCS1               | NIT2                                                   |
| RBBP4P1                            | POC5                        | COX7C               | CTD                                                    |
| COX7A2                             | RP1                         | PEX7                | RP4                                                    |
| PMS2P1                             | ARF5                        | CHCHD7              | HNRNPA1P4                                              |
| BICD2                              | SEC61B                      | ATP6V1G1            | FAM208B                                                |
| LAMTOR1                            | ATP5L                       | SPA17               | FOXRED1                                                |
| AKAP6                              | ERH                         | SLIRP               | TTC7B                                                  |
| GNAO1                              | GAN                         | TXNDC17             | ARHGAP44                                               |
| NT5C                               | ELAC1                       | UQCR11              | NDUFA11                                                |
| NDUFA13                            | ALKBH6                      | SNRPD2              | ZNF552                                                 |
| ADORA2A                            | RP3                         | RP6                 | PSMA6P2                                                |
| GOBPID                             | Pvalue                      | OddsRatio           | ExpCount                                               |
| GO:0022904                         | 15                          | 96                  | respiratory electron transport chain                   |
| GO:0022900                         | 15                          | 134                 | electron transport chain                               |
| GO:0045333                         | 15                          | 142                 | cellular respiration                                   |
| GO:0015980                         | 307                         |                     | energy derivation by oxidation of organic compounds    |
| GO:0006120                         | 8                           | 36                  | mitochondrial electron transport, NADH to ubiquinone   |
| GO:0042773                         | 47                          |                     | ATP synthesis coupled electron transport               |
| GO:0042775                         | 47                          |                     | mitochondrial ATP synthesis coupled electron transport |
| GO:0006091                         | 428                         |                     | generation of precursor metabolites and energy         |
| GO:0006119                         | 8                           | 58                  | oxidative phosphorylation                              |
| Tissue: Artery_Tibial=>whole_Blood |                             |                     | Type: cluster                                          |
| SourceGene:                        | CPLX2(ENSG00000145920.9)    |                     |                                                        |
| TargetGeneSet:                     | CACNA1A                     | HAPLN2              | KCNJ9                                                  |
| MYT1L                              | VSNL1                       | DPYSL5              | CTNNA2                                                 |
| ATP2B2                             | SLC6A1                      | ARPP21              | CAMKV                                                  |
| SOX2-OT                            | PPP2R2C                     | SYNPO2              | GRIA2                                                  |
| NRSN1                              | MOG                         | TRM4                | GRIN1                                                  |
| CALN1                              | SRRM3                       | GTM4                | GRIN2                                                  |
| GABBR2                             | DBC1                        | NCS1                | GRIN1                                                  |
| LRRC10B                            | CHRM1                       | PIH1D2              | KCNA1                                                  |
| PPP4R4                             | CYP46A1                     | SCG5                | CKMT1B                                                 |
| SOGA2                              | SYT4                        | ST8SIA3             | CDH20                                                  |
| SLC8A2                             | PRKCG                       | CHGB                | SNAP25                                                 |
| TMEM35                             | TCEAL2                      | TCEAL5              | TCEAL7                                                 |
| GOBPID                             | Pvalue                      | OddsRatio           | ExpCount                                               |
| GO:0007269                         | 11                          | 86                  | neurotransmitter secretion                             |
| GO:0006836                         | 11                          | 119                 | neurotransmitter transport                             |
| GO:0001505                         | 11                          | 123                 | regulation of neurotransmitter levels                  |
| GO:0003001                         | 316                         |                     | generation of a signal involved in cell-cell signaling |
| GO:0023061                         | 316                         |                     | signal release                                         |
| GO:0007214                         |                             |                     |                                                        |



Stable4\_20PerPair

|                                    |          |                                                                     |                  |                   |          |                   |         |                   |         |
|------------------------------------|----------|---------------------------------------------------------------------|------------------|-------------------|----------|-------------------|---------|-------------------|---------|
| 5                                  | 18       | gamma-aminobutyric acid signaling pathway                           |                  |                   |          |                   |         |                   |         |
| GO:0048489                         |          | 7.64673956903262e-07                                                | 22.4678178963893 |                   |          |                   |         | 0.32219223583143  |         |
| 6                                  | 48       | synaptic vesicle transport                                          |                  |                   |          |                   |         |                   |         |
| GO:0016079                         |          | 1.53219011289151e-06                                                | 31.15            | 0.201370147394644 |          |                   | 5       |                   | 30      |
|                                    |          | synaptic vesicle exocytosis                                         |                  |                   |          |                   |         |                   |         |
| GO:0007270                         |          | 2.00961671328466e-06                                                | 13.7052126200274 |                   |          |                   |         | 0.590685765690956 |         |
| 7                                  | 88       | neuron-neuron synaptic transmission                                 |                  |                   |          |                   |         |                   |         |
| GO:0007611                         |          | 4.68254573777622e-06                                                | 9.61121905888316 |                   |          |                   |         | 0.946439692754827 |         |
| 8                                  | 141      | learning or memory                                                  |                  |                   |          |                   |         |                   |         |
| GO:0050890                         |          | 8.98410609145878e-06                                                | 8.74742188702478 |                   |          |                   |         | 1.03370008995917  |         |
| 8                                  | 154      | cognition                                                           |                  |                   |          |                   |         |                   |         |
| GO:0050808                         |          | 1.13040743836982e-05                                                | 10.3560747663551 |                   |          |                   |         | 0.765206560099647 |         |
| 7                                  | 114      | synapse organization                                                |                  |                   |          |                   |         |                   |         |
| Tissue: Whole_Blood=>Artery_Tibial |          |                                                                     | Type: asymmetric |                   |          |                   |         |                   |         |
| SourceGene:                        |          | CPSF1(ENSG00000071894.9)                                            |                  |                   |          |                   |         |                   |         |
| TargetGeneSet:                     |          | RPL22                                                               | NDUFS5           | C1orf50           | RPS8     | RP4               | RPL5    | RP11              | C1orf54 |
| PSMB4                              | ACBD6    | CYB5R1                                                              | RPS7             | RNF181            | CHCHD5   | BRK1              | RPL15   | EIF1B             | SPCS1   |
| RPL10AP6                           |          | C3orf33                                                             | COX7C            | CTD               | BOD1     | TMEM14C           | CSNK2B  | C6orf48           | RPS10   |
| RPL10A                             | MRPS12   | SF3B5                                                               | RPA3             | CHCHD2            | TMEM60   | C7orf59           | ZNHIT1  | TERF1             | EIF3H   |
| CPSF1                              | RPS6     | CLTA                                                                | RPL7A            | ST13P13           | MRPL23   | RNASEH2C          |         | MRPL11            | FTH1P16 |
| ATP5L                              | U6       | WNT1                                                                | YEATS4           | SLC25A3           | RPL18AP3 |                   | RPL6    | PEBP1             | ARL6IP4 |
| NUFIP1                             | TRAV13-2 |                                                                     | AP4S1            | COX16             | SRP14    | RSL24D1           | RPS3AP6 | COMMD4            | SEC11A  |
| TM2D3                              | ECI1     | BCL7C                                                               | LDHD             | COX4I1            | RPAIN    | SAT2              | RPS7P1  | CCDC56            | RPL27   |
| SUMO2                              | ALKBH7   | WDR83OS                                                             | NDUFB7           | MYO9B             | RPL18A   | SNRPD2            | SEPW1   | RPS5              | FTLP3   |
| MT1P3                              | YBEY     | TXN2                                                                | XRCC6            | C22orf32          |          | UXT               | PQBP1   |                   |         |
| GOBPID                             | Pvalue   | OddsRatio                                                           | ExpCount         | Count             | Size     | Term              |         |                   |         |
| GO:0006614                         |          | 3.81818462543385e-21                                                | 55.8866634098681 |                   |          | 0.450487855511729 |         |                   |         |
| 16                                 | 105      | SRP-dependent cotranslational protein targeting to membrane         |                  |                   |          |                   |         |                   |         |
| GO:0006613                         |          | 4.48341940480774e-21                                                | 55.2618357487923 |                   |          | 0.454778216040412 |         |                   |         |
| 16                                 | 106      | cotranslational protein targeting to membrane                       |                  |                   |          |                   |         |                   |         |
| GO:0045047                         |          | 4.48341940480774e-21                                                | 55.2618357487923 |                   |          | 0.454778216040412 |         |                   |         |
| 16                                 | 106      | protein targeting to ER                                             |                  |                   |          |                   |         |                   |         |
| GO:0072599                         |          | 4.48341940480774e-21                                                | 55.2618357487923 |                   |          | 0.454778216040412 |         |                   |         |
| 16                                 | 106      | establishment of protein localization to endoplasmic reticulum      |                  |                   |          |                   |         |                   |         |
| GO:0070972                         |          | 2.7306000495633e-20                                                 | 48.7195225916454 |                   |          | 0.50626254238461  |         |                   |         |
| 16                                 | 118      | protein localization to endoplasmic reticulum                       |                  |                   |          |                   |         |                   |         |
| GO:0006612                         |          | 2.01779658634231e-18                                                | 36.1840685496668 |                   |          | 0.65642516088852  |         |                   |         |
| 16                                 | 153      | protein targeting to membrane                                       |                  |                   |          |                   |         |                   |         |
| GO:0006414                         |          | 1.01774915410727e-17                                                | 45.8269230769231 |                   |          | 0.450487855511729 |         |                   |         |
| 14                                 | 105      | translational elongation                                            |                  |                   |          |                   |         |                   |         |
| GO:0006413                         |          | 6.43430904318494e-17                                                | 33.2008075788166 |                   |          | 0.652134800359837 |         |                   |         |
| 15                                 | 152      | translational initiation                                            |                  |                   |          |                   |         |                   |         |
| GO:0006415                         |          | 6.50171905539358e-17                                                | 48.6768707482993 |                   |          | 0.390422808110165 |         |                   |         |
| 13                                 | 91       | translational termination                                           |                  |                   |          |                   |         |                   |         |
| GO:0072594                         |          | 2.12482464322994e-16                                                | 26.2738205365402 |                   |          | 0.87523354785136  |         |                   |         |
| 16                                 | 204      | establishment of protein localization to organelle                  |                  |                   |          |                   |         |                   |         |
| GO:0000184                         |          | 2.42343410352065e-15                                                | 35.7487485560262 |                   |          | 0.510552902913293 |         |                   |         |
| 13                                 | 119      | nuclear-transcribed mRNA catabolic process, nonsense-mediated decay |                  |                   |          |                   |         |                   |         |
| GO:0019080                         |          | 5.61422610328355e-14                                                | 27.3976634131914 |                   |          | 0.647844439831154 |         |                   |         |
| 13                                 | 151      | viral genome expression                                             |                  |                   |          |                   |         |                   |         |
| GO:0019083                         |          | 5.61422610328355e-14                                                | 27.3976634131914 |                   |          | 0.647844439831154 |         |                   |         |
| 13                                 | 151      | viral transcription                                                 |                  |                   |          |                   |         |                   |         |
| GO:0043624                         |          | 6.66687276281697e-14                                                | 27.0024781341108 |                   |          | 0.65642516088852  |         |                   |         |
| 13                                 | 153      | cellular protein complex disassembly                                |                  |                   |          |                   |         |                   |         |
| GO:0043241                         |          | 1.01386702052561e-13                                                | 26.0622097114708 |                   |          | 0.677876963531935 |         |                   |         |
| 13                                 | 158      | protein complex disassembly                                         |                  |                   |          |                   |         |                   |         |
| GO:0006401                         |          | 1.36798618509885e-13                                                | 21.6810645724258 |                   |          | 0.879523908380043 |         |                   |         |
| 14                                 | 205      | RNA catabolic process                                               |                  |                   |          |                   |         |                   |         |
| GO:0000956                         |          | 2.42934209262384e-13                                                | 24.2057823129252 |                   |          | 0.72507092934745  |         |                   |         |
| 13                                 | 169      | nuclear-transcribed mRNA catabolic process                          |                  |                   |          |                   |         |                   |         |
| GO:0034623                         |          | 3.54202475228955e-13                                                | 23.4458106223856 |                   |          | 0.746522731990866 |         |                   |         |
| 13                                 | 174      | cellular macromolecular complex disassembly                         |                  |                   |          |                   |         |                   |         |
| GO:0006402                         |          | 4.74940310853451e-13                                                | 22.8709956709957 |                   |          | 0.763684174105598 |         |                   |         |

STable4\_20PerPair

|                                                                   |     |                                                                     |                  |                   |  |  |  |  |    |
|-------------------------------------------------------------------|-----|---------------------------------------------------------------------|------------------|-------------------|--|--|--|--|----|
| 13                                                                | 178 | mRNA catabolic process                                              |                  |                   |  |  |  |  |    |
| GO:0032984                                                        |     | 5.10507677451707e-13                                                | 22.731620358987  | 0.767974534634281 |  |  |  |  | 13 |
| 179                                                               |     | macromolecular complex disassembly                                  |                  |                   |  |  |  |  |    |
| GO:0019058                                                        |     | 7.06772061132108e-13                                                | 19.0483870967742 | 0.991073282125804 |  |  |  |  |    |
| 14                                                                | 231 | viral infectious cycle                                              |                  |                   |  |  |  |  |    |
| GO:0022415                                                        |     | 3.53630696857751e-12                                                | 16.7684620596206 | 1.11549373745762  |  |  |  |  |    |
| 14                                                                | 260 | viral reproductive process                                          |                  |                   |  |  |  |  |    |
| GO:0033365                                                        |     | 8.12075047112856e-12                                                | 11.5429337231969 | 2.02934053006712  |  |  |  |  |    |
| 17                                                                | 473 | protein localization to organelle                                   |                  |                   |  |  |  |  |    |
| GO:0006605                                                        |     | 8.39739015155602e-12                                                | 11.5168490153173 | 2.03363089059581  |  |  |  |  |    |
| 17                                                                | 474 | protein targeting                                                   |                  |                   |  |  |  |  |    |
| GO:0071845                                                        |     | 1.74322364236693e-10                                                | 13.8213720912719 | 1.21846239014601  |  |  |  |  |    |
| 13                                                                | 284 | cellular component disassembly at cellular level                    |                  |                   |  |  |  |  |    |
| GO:0022411                                                        |     | 2.0723769572223e-10                                                 | 13.6164749536178 | 1.23562383226074  |  |  |  |  |    |
| 13                                                                | 288 | cellular component disassembly                                      |                  |                   |  |  |  |  |    |
| GO:0016032                                                        |     | 4.99245580574251e-10                                                | 10.2134979504197 | 1.93495259843609  |  |  |  |  |    |
| 15                                                                | 451 | viral reproduction                                                  |                  |                   |  |  |  |  |    |
| GO:0022613                                                        |     | 4.54143754582648e-07                                                | 11.1422955974843 | 0.965331118953706 |  |  |  |  |    |
| 9                                                                 | 225 | ribonucleoprotein complex biogenesis                                |                  |                   |  |  |  |  |    |
| GO:0071843                                                        |     | 7.53473849246801e-07                                                | 10.4537325676784 | 1.02539616635527  |  |  |  |  |    |
| 9                                                                 | 239 | cellular component biogenesis at cellular level                     |                  |                   |  |  |  |  |    |
| Tissue: whole_blood=>Artery_Tibial Type: cluster                  |     |                                                                     |                  |                   |  |  |  |  |    |
| SourceGene: CPSF1(ENSG00000071894.9)                              |     |                                                                     |                  |                   |  |  |  |  |    |
| TargetGeneSet: RPL22 NDUFS5 C1orf50 RPS8 RP4 RPL5 RP11 C1orf54    |     |                                                                     |                  |                   |  |  |  |  |    |
| PSMB4 ACBD6 CYB5R1 RPS7 RNF181 CHCHD5 BRK1 RPL15 EIF1B SPCS1      |     |                                                                     |                  |                   |  |  |  |  |    |
| RPL10AP6 C3orf33 COX7C CTD BOD1 TMEM14C CSNK2B C6orf48 RPS10      |     |                                                                     |                  |                   |  |  |  |  |    |
| RPL10A MRPS12 SF3B5 RPA3 CHCHD2 TMEM60 C7orf59 ZNHIT1 TERF1 EIF3H |     |                                                                     |                  |                   |  |  |  |  |    |
| CPSF1 RPS6 CLTA RPL7A ST13P13 MRPL23 RNASEH2C MRPL11 FTH1P16      |     |                                                                     |                  |                   |  |  |  |  |    |
| ATP5L U6 WNT1 YEATS4 SLC25A3 RPL18AP3 RPL6 PEBP1 ARL6IP4          |     |                                                                     |                  |                   |  |  |  |  |    |
| NUFIP1 TRAV13-2 AP4S1 COX16 SRP14 RSL24D1 RPS3AP6 COMMD4 SEC11A   |     |                                                                     |                  |                   |  |  |  |  |    |
| TM2D3 ECI1 BCL7C LDHD COX4I1 RPAIN SAT2 RPS7P1 CCDC56 RPL27       |     |                                                                     |                  |                   |  |  |  |  |    |
| SUMO2 ALKBH7 WDR83OS NDUFB7 MYO9B RPL18A SNRPD2 SEPW1 RPS5 FTLP3  |     |                                                                     |                  |                   |  |  |  |  |    |
| MT1P3 YBEY TXN2 XRCC6 C22orf32 UXT PQBP1                          |     |                                                                     |                  |                   |  |  |  |  |    |
| GOBPID Pvalue OddsRatio ExpCount Count Size Term                  |     |                                                                     |                  |                   |  |  |  |  |    |
| GO:0006614                                                        |     | 3.81818462543385e-21                                                | 55.8866634098681 | 0.450487855511729 |  |  |  |  |    |
| 16                                                                | 105 | SRP-dependent cotranslational protein targeting to membrane         |                  |                   |  |  |  |  |    |
| GO:0006613                                                        |     | 4.48341940480774e-21                                                | 55.2618357487923 | 0.454778216040412 |  |  |  |  |    |
| 16                                                                | 106 | cotranslational protein targeting to membrane                       |                  |                   |  |  |  |  |    |
| GO:0045047                                                        |     | 4.48341940480774e-21                                                | 55.2618357487923 | 0.454778216040412 |  |  |  |  |    |
| 16                                                                | 106 | protein targeting to ER                                             |                  |                   |  |  |  |  |    |
| GO:0072599                                                        |     | 4.48341940480774e-21                                                | 55.2618357487923 | 0.454778216040412 |  |  |  |  |    |
| 16                                                                | 106 | establishment of protein localization to endoplasmic reticulum      |                  |                   |  |  |  |  |    |
| GO:0070972                                                        |     | 2.7306000495633e-20                                                 | 48.7195225916454 | 0.50626254238461  |  |  |  |  |    |
| 16                                                                | 118 | protein localization to endoplasmic reticulum                       |                  |                   |  |  |  |  |    |
| GO:0006612                                                        |     | 2.01779658634231e-18                                                | 36.1840685496668 | 0.65642516088852  |  |  |  |  |    |
| 16                                                                | 153 | protein targeting to membrane                                       |                  |                   |  |  |  |  |    |
| GO:0006414                                                        |     | 1.01774915410727e-17                                                | 45.8269230769231 | 0.450487855511729 |  |  |  |  |    |
| 14                                                                | 105 | translational elongation                                            |                  |                   |  |  |  |  |    |
| GO:0006413                                                        |     | 6.43430904318494e-17                                                | 33.2008075788166 | 0.652134800359837 |  |  |  |  |    |
| 15                                                                | 152 | translational initiation                                            |                  |                   |  |  |  |  |    |
| GO:0006415                                                        |     | 6.50171905539358e-17                                                | 48.6768707482993 | 0.390422808110165 |  |  |  |  |    |
| 13                                                                | 91  | translational termination                                           |                  |                   |  |  |  |  |    |
| GO:0072594                                                        |     | 2.12482464322994e-16                                                | 26.2738205365402 | 0.87523354785136  |  |  |  |  |    |
| 16                                                                | 204 | establishment of protein localization to organelle                  |                  |                   |  |  |  |  |    |
| GO:0000184                                                        |     | 2.42343410352065e-15                                                | 35.7487485560262 | 0.510552902913293 |  |  |  |  |    |
| 13                                                                | 119 | nuclear-transcribed mRNA catabolic process, nonsense-mediated decay |                  |                   |  |  |  |  |    |
| GO:0019080                                                        |     | 5.61422610328355e-14                                                | 27.3976634131914 | 0.647844439831154 |  |  |  |  |    |
| 13                                                                | 151 | viral genome expression                                             |                  |                   |  |  |  |  |    |
| GO:0019083                                                        |     | 5.61422610328355e-14                                                | 27.3976634131914 | 0.647844439831154 |  |  |  |  |    |
| 13                                                                | 151 | viral transcription                                                 |                  |                   |  |  |  |  |    |
| GO:0043624                                                        |     | 6.66687276281697e-14                                                | 27.0024781341108 | 0.65642516088852  |  |  |  |  |    |
| 13                                                                | 153 | cellular protein complex disassembly                                |                  |                   |  |  |  |  |    |
| GO:0043241                                                        |     | 1.01386702052561e-13                                                | 26.0622097114708 | 0.677876963531935 |  |  |  |  |    |

STable4\_20PerPair

|                                         |        |                                                  |                  |                   |          |          |           |                    |         |
|-----------------------------------------|--------|--------------------------------------------------|------------------|-------------------|----------|----------|-----------|--------------------|---------|
| 13                                      | 158    | protein complex disassembly                      |                  |                   |          |          |           |                    |         |
| GO:0006401                              |        | 1.36798618509885e-13                             | 21.6810645724258 |                   |          |          |           | 0.879523908380043  |         |
| 14                                      | 205    | RNA catabolic process                            |                  |                   |          |          |           |                    |         |
| GO:0000956                              |        | 2.42934209262384e-13                             | 24.2057823129252 |                   |          |          |           | 0.72507092934745   |         |
| 13                                      | 169    | nuclear-transcribed mRNA catabolic process       |                  |                   |          |          |           |                    |         |
| GO:0034623                              |        | 3.54202475228955e-13                             | 23.4458106223856 |                   |          |          |           | 0.746522731990866  |         |
| 13                                      | 174    | cellular macromolecular complex disassembly      |                  |                   |          |          |           |                    |         |
| GO:0006402                              |        | 4.74940310853451e-13                             | 22.8709956709957 |                   |          |          |           | 0.763684174105598  |         |
| 13                                      | 178    | mRNA catabolic process                           |                  |                   |          |          |           |                    |         |
| GO:0032984                              |        | 5.10507677451707e-13                             | 22.731620358987  | 0.767974534634281 |          |          |           |                    | 13      |
| 179                                     |        | macromolecular complex disassembly               |                  |                   |          |          |           |                    |         |
| GO:0019058                              |        | 7.06772061132108e-13                             | 19.0483870967742 |                   |          |          |           | 0.991073282125804  |         |
| 14                                      | 231    | viral infectious cycle                           |                  |                   |          |          |           |                    |         |
| GO:0022415                              |        | 3.53630696857751e-12                             | 16.7684620596206 |                   |          |          |           | 1.11549373745762   |         |
| 14                                      | 260    | viral reproductive process                       |                  |                   |          |          |           |                    |         |
| GO:0033365                              |        | 8.12075047112856e-12                             | 11.5429337231969 |                   |          |          |           | 2.02934053006712   |         |
| 17                                      | 473    | protein localization to organelle                |                  |                   |          |          |           |                    |         |
| GO:0006605                              |        | 8.39739015155602e-12                             | 11.5168490153173 |                   |          |          |           | 2.03363089059581   |         |
| 17                                      | 474    | protein targeting                                |                  |                   |          |          |           |                    |         |
| GO:0071845                              |        | 1.74322364236693e-10                             | 13.8213720912719 |                   |          |          |           | 1.21846239014601   |         |
| 13                                      | 284    | cellular component disassembly at cellular level |                  |                   |          |          |           |                    |         |
| GO:0022411                              |        | 2.0723769572223e-10                              | 13.6164749536178 |                   |          |          |           | 1.23562383226074   |         |
| 13                                      | 288    | cellular component disassembly                   |                  |                   |          |          |           |                    |         |
| GO:0016032                              |        | 4.99245580574251e-10                             | 10.2134979504197 |                   |          |          |           | 1.93495259843609   |         |
| 15                                      | 451    | viral reproduction                               |                  |                   |          |          |           |                    |         |
| GO:0022613                              |        | 4.54143754582648e-07                             | 11.1422955974843 |                   |          |          |           | 0.965331118953706  |         |
| 9                                       | 225    | ribonucleoprotein complex biogenesis             |                  |                   |          |          |           |                    |         |
| GO:0071843                              |        | 7.53473849246801e-07                             | 10.4537325676784 |                   |          |          |           | 1.02539616635527   |         |
| 9                                       | 239    | cellular component biogenesis at cellular level  |                  |                   |          |          |           |                    |         |
| Tissue: Artery_Tibial=>whole_Blood      |        | Type: asymmetric                                 |                  |                   |          |          |           |                    |         |
| SourceGene: EIF1AP1(ENSG00000236698.1)  |        |                                                  |                  |                   |          |          |           |                    |         |
| TargetGeneSet:                          |        | CELA2A                                           | CELA3B           | CELA3A            | COL9A2   | TCTEX1D4 | AMY2A     | ARHGAP30           |         |
| RP11                                    | REG1A  | RAB3GAP1                                         | TMEM45A          | CPB1              | BASP1    | SREK1IP1 | CTB       |                    |         |
| ADAMTS2                                 | TAPBP  | ARMC12                                           | CLPS             | PKIB              | EEDP1    | TPST1    | CPA2      | CPA1               | PRSS1   |
| ST13P6                                  | KLF9   | OLAH                                             | YWHAZP3          | PNLIP             | PNLIPRP1 | PNLIPRP2 | HTRA1     |                    |         |
| PTGDR2                                  | BIRC3  | IL18                                             | CD163            | ERGIC2            | CPM      | PLA2G1B  | HDC       | GP2                | CTD     |
| CTRB2                                   | CTRB1  | WRAP53                                           | NF1              | ZNF385C           | CACNA1A  | CYP4F22  | RAB3A     | SYCN               | CEACAM3 |
| CALM3                                   | SIRPG  | PRAF2                                            | F8A1             |                   |          |          |           |                    |         |
| GOBPID                                  | Pvalue | OddsRatio                                        | ExpCount         | Count             | Size     | Term     |           |                    |         |
| GO:0007586                              |        | 4.93335756690257e-11                             | 34.7959459459459 |                   |          |          |           | 0.346965607916407  |         |
| 9                                       | 109    | digestion                                        |                  |                   |          |          |           |                    |         |
| GO:0044241                              |        | 1.19534012668532e-07                             | 124.623376623377 |                   |          |          |           | 0.0477475607224414 |         |
| 4                                       | 15     | lipid digestion                                  |                  |                   |          |          |           |                    |         |
| Tissue: whole_Blood=>Artery_Tibial      |        | Type: asymmetric                                 |                  |                   |          |          |           |                    |         |
| SourceGene: ENSG00000205233.4           |        |                                                  |                  |                   |          |          |           |                    |         |
| TargetGeneSet:                          |        | RPL22                                            | EIF4G3           | RP11              | AGL      | TOMM20   | DGUOK-AS1 | HDLBP              |         |
| RPL15                                   | EIF1B  | RPL15P3                                          | DDAH2            | RPL10A            | SRPK1    | ASCC3    | FAM120B   | GTF2I              | COG5    |
| LUC7L2                                  | EIF3H  | NFIB                                             | ALAD             | PFKP              | DAZAP2   | TMEM19   | NME2P1    | OXA1L              | GMPR2   |
| RSL24D1                                 | SEC11A | CEP95                                            | TSEN34           | BACH1             | EIF3D    | RRAGB    | TTC3P1    | RBMX2              |         |
| GOBPID                                  | Pvalue | OddsRatio                                        | ExpCount         | Count             | Size     | Term     |           |                    |         |
| GO:0006413                              |        | 1.21995167857677e-08                             | 32.8229885057471 |                   |          |          |           | 0.294512490485088  |         |
| 7                                       | 152    | translational initiation                         |                  |                   |          |          |           |                    |         |
| Tissue: whole_Blood=>Artery_Tibial      |        | Type: asymmetric                                 |                  |                   |          |          |           |                    |         |
| SourceGene: HERC2P2(ENSG00000140181.10) |        |                                                  |                  |                   |          |          |           |                    |         |
| TargetGeneSet:                          |        | KLHL17                                           | RPL22            | HMG2              | PPCS     | SLC6A9   | RPS8      | RP11               | FGGY    |
| SGIP1                                   | RPL5   | BCAS2                                            | PRKAB2           | MRPL9             | GBAP1    | PEX19    | PPFIA4    | ANKS1B             | NUP133  |
| TMEM18                                  | RPS7   | C2orf28                                          | MEMO1            | GFPT1             | SFXN5    | CHCHD5   | PTPN4     | MAP3K2             | NCKAP1  |
| SATB2                                   | RAB17  | XPC                                              | ACAA1            | SPCS1             | RPL10AP6 |          | CNTN3     | PVRL3-AS1          |         |
| SPICE1                                  | ZMAT3  | CHRD                                             | EXOSC9           | NDUFC1            | NSA2     | COX7C    | CTD       | P4HA2              | SEPT8   |
| CPEB4                                   | ARL10  | TMEM14B                                          | BTN2A3P          | GPANK1            | DDAH2    | RPS18    | RPS10     | RPL10A             | RPL24P4 |
| MRPL2                                   | VEGFA  | MRPS12                                           | PSMB1            | C7orf50           | MICALL2  | TOMM7    | DPY19L1   | GTF2I              | C7orf59 |
| PMS2P1                                  | MUC3A  | ARF5                                             | MRPS33           | SLC4A2            | CHCHD7   | DECR1    | C9orf123  | RPS6               |         |
| CHMP5                                   | NUDT2  | FAM219A                                          | VPS13A           | FSD1L             | VAV2     | EDF1     | RP13      | USMG5              | OCRL    |

Stable4\_20PerPair

| EIF3M      | ALKBH3 | PLCB3     | UCP2                 | USP35            | C11orf1          | ATP5L                                                               | CACNA1C-AS1 | LEPREL2  |          |      |
|------------|--------|-----------|----------------------|------------------|------------------|---------------------------------------------------------------------|-------------|----------|----------|------|
| ADCY6      | CACNB3 | LETMD1    | DGKA                 | SLC25A3          | CKAP4            | PEBP1                                                               | SETD8       | SAP18    | RPS7P10  |      |
| COMMD6     | OXA1L  | GMPR2     | RPS29                | DDHD1            | SNW1             | C14orf2                                                             | HERC2P2     | HMG2P5   | SRP14    |      |
| MAPKBP1    | DUOX1  | RPS3AP6   | MAN2A2               | GLIS2            | UBFD1            | NSMCE1                                                              | FBXL8       | KIAA0513 |          |      |
| COX4I1     | CYB5D2 | LLGL1     | RPS7P1               | SMARCE1          | RPL27            | TBKBP1                                                              | SLC16A3     | CIRBP    | REEP6    |      |
| MRPL54     | NDUFA7 | MYO9B     | USE1                 | DPY19L3          | FXYD1            | ZNF226                                                              | SNRPD2      | RPL28    | RPS5     | SNPH |
| EBF4       | VPS16  | LINC00493 |                      | DTD1             | C20orf43         |                                                                     | ATP5J       | CRYZL1   | C21orf33 |      |
| FAM118A    | ARSD   | EEF1B2P3  |                      | UXT              | FGD1             | PDZD11                                                              | RPS23P8     | PIN4     | RPS6KA6  |      |
| CXorf56    | RP3    |           |                      |                  |                  |                                                                     |             |          |          |      |
| GOBPID     | Pvalue | OddsRatio | ExpCount             | Count            | Size             | Term                                                                |             |          |          |      |
| GO:0006614 | 14     | 105       | 2.35395294561711e-13 | 20.0945659844742 |                  | 0.893709777870044                                                   |             |          |          |      |
|            |        |           |                      |                  |                  | SRP-dependent cotranslational protein targeting to membrane         |             |          |          |      |
| GO:0006613 | 14     | 106       | 2.69299584376163e-13 | 19.8747506980455 |                  | 0.902221299564044                                                   |             |          |          |      |
|            |        |           |                      |                  |                  | cotranslational protein targeting to membrane                       |             |          |          |      |
| GO:0045047 | 14     | 106       | 2.69299584376163e-13 | 19.8747506980455 |                  | 0.902221299564044                                                   |             |          |          |      |
|            |        |           |                      |                  |                  | protein targeting to ER                                             |             |          |          |      |
| GO:0072599 | 14     | 106       | 2.69299584376163e-13 | 19.8747506980455 |                  | 0.902221299564044                                                   |             |          |          |      |
|            |        |           |                      |                  |                  | establishment of protein localization to endoplasmic reticulum      |             |          |          |      |
| GO:0070972 | 14     | 118       | 1.22070507063295e-12 | 17.5666901905434 |                  | 1.00435955989205                                                    |             |          |          |      |
|            |        |           |                      |                  |                  | protein localization to endoplasmic reticulum                       |             |          |          |      |
| GO:0006612 | 15     | 153       | 3.0908997356395e-12  | 14.2814009661836 |                  | 1.30226281918206                                                    |             |          |          |      |
|            |        |           |                      |                  |                  | protein targeting to membrane                                       |             |          |          |      |
| GO:0006414 | 13     | 105       | 4.65713112799928e-12 | 18.2873517786561 |                  | 0.893709777870044                                                   |             |          |          |      |
|            |        |           |                      |                  |                  | translational elongation                                            |             |          |          |      |
| GO:0006415 | 12     | 91        | 1.49929257841184e-11 | 19.4991447143346 |                  | 0.774548474154038                                                   |             |          |          |      |
|            |        |           |                      |                  |                  | translational termination                                           |             |          |          |      |
| GO:0072594 | 16     | 204       | 1.73193862839245e-11 | 11.2467687413005 |                  | 1.73635042557608                                                    |             |          |          |      |
|            |        |           |                      |                  |                  | establishment of protein localization to organelle                  |             |          |          |      |
| GO:0000184 | 12     | 119       | 3.69256863969297e-10 | 14.3682748168729 |                  | 1.01287108158605                                                    |             |          |          |      |
|            |        |           |                      |                  |                  | nuclear-transcribed mRNA catabolic process, nonsense-mediated decay |             |          |          |      |
| GO:0006413 | 13     | 152       | 5.22731058408295e-10 | 12.0638979725311 |                  | 1.29375129748806                                                    |             |          |          |      |
|            |        |           |                      |                  |                  | translational initiation                                            |             |          |          |      |
| GO:0000956 | 13     | 169       | 1.94036717768034e-09 | 10.7363636363636 |                  | 1.43844716628607                                                    |             |          |          |      |
|            |        |           |                      |                  |                  | nuclear-transcribed mRNA catabolic process                          |             |          |          |      |
| GO:0034623 | 13     | 174       | 2.77379799910712e-09 | 10.3992659514399 |                  | 1.48100477475607                                                    |             |          |          |      |
|            |        |           |                      |                  |                  | cellular macromolecular complex disassembly                         |             |          |          |      |
| GO:0006402 | 13     | 178       | 3.66104137082604e-09 | 10.1442975206612 |                  | 1.51505086153207                                                    |             |          |          |      |
|            |        |           |                      |                  |                  | mRNA catabolic process                                              |             |          |          |      |
| GO:0032984 | 13     | 179       | 3.91970579103365e-09 | 10.0824753559693 |                  | 1.52356238322607                                                    |             |          |          |      |
|            |        |           |                      |                  |                  | macromolecular complex disassembly                                  |             |          |          |      |
| GO:0019080 | 12     | 151       | 5.80069085687583e-09 | 11.0355823449349 |                  | 1.28523977579406                                                    |             |          |          |      |
|            |        |           |                      |                  |                  | viral genome expression                                             |             |          |          |      |
| GO:0019083 | 12     | 151       | 5.80069085687583e-09 | 11.0355823449349 |                  | 1.28523977579406                                                    |             |          |          |      |
|            |        |           |                      |                  |                  | viral transcription                                                 |             |          |          |      |
| GO:0043624 | 153    |           | 6.73699148366134e-09 | 10.877515813686  | 1.30226281918206 | 12                                                                  |             |          |          |      |
|            |        |           |                      |                  |                  | cellular protein complex disassembly                                |             |          |          |      |
| GO:0043241 | 12     | 158       | 9.70034631340651e-09 | 10.5012958163643 |                  | 1.34482042765207                                                    |             |          |          |      |
|            |        |           |                      |                  |                  | protein complex disassembly                                         |             |          |          |      |
| GO:0006401 | 13     | 205       | 2.01161612809203e-08 | 8.70113636363636 |                  | 1.74486194727009                                                    |             |          |          |      |
|            |        |           |                      |                  |                  | RNA catabolic process                                               |             |          |          |      |
| GO:0071843 | 239    |           | 1.22741358088792e-07 | 7.37433628318584 |                  | 2.0342536848661                                                     | 13          |          |          |      |
|            |        |           |                      |                  |                  | cellular component biogenesis at cellular level                     |             |          |          |      |
| GO:0019058 | 231    |           | 6.30297826240347e-07 | 6.96482784154017 |                  | 1.9661615113141                                                     | 12          |          |          |      |
|            |        |           |                      |                  |                  | viral infectious cycle                                              |             |          |          |      |
| GO:0071845 | 13     | 284       | 8.84326593732462e-07 | 6.13019121100302 |                  | 2.41727216109612                                                    |             |          |          |      |
|            |        |           |                      |                  |                  | cellular component disassembly at cellular level                    |             |          |          |      |
| GO:0022411 | 13     | 288       | 1.03484073380331e-06 | 6.03930578512397 |                  | 2.45131824787212                                                    |             |          |          |      |
|            |        |           |                      |                  |                  | cellular component disassembly                                      |             |          |          |      |
| GO:0022415 | 12     | 260       | 2.18850039024828e-06 | 6.13775065387969 |                  | 2.21299564044011                                                    |             |          |          |      |
|            |        |           |                      |                  |                  | viral reproductive process                                          |             |          |          |      |
| GO:0033365 | 473    |           | 2.54245048213041e-06 | 4.53866132231743 |                  | 4.0259497612622                                                     | 16          |          |          |      |
|            |        |           |                      |                  |                  | protein localization to organelle                                   |             |          |          |      |
| GO:0006605 |        |           | 2.61261196657949e-06 | 4.52842509080521 |                  | 4.0344612829562                                                     | 16          |          |          |      |

Stable4\_20PerPair

|                                                  |                                                                            |                      |                  |                     |
|--------------------------------------------------|----------------------------------------------------------------------------|----------------------|------------------|---------------------|
| 474                                              | protein targeting                                                          | 3.41149192836991e-06 | 6.47755340453939 | 1.91509238115009    |
| GO:0022613                                       | 11 225 ribonucleoprotein complex biogenesis                                |                      |                  |                     |
| GO:0015980                                       | 12 307 energy derivation by oxidation of organic compounds                 | 1.19544966232335e-05 | 5.14264773247824 | 2.61303716005813    |
| GO:0022904                                       | 7 96 respiratory electron transport chain                                  | 1.73595233003197e-05 | 9.65449438202247 | 0.81710608262404    |
| Tissue: whole_Blood=>Artery_Tibial Type: cluster |                                                                            |                      |                  |                     |
| SourceGene: HERC2P2(ENSG00000140181.10)          |                                                                            |                      |                  |                     |
| TargetGeneSet:                                   | KLHL17 RPL22 HMG2 PPCS SLC6A9 RPS8 RP11 FGGY                               |                      |                  |                     |
| SGIP1                                            | RPL5 BCAS2 PRKAB2 MRPL9 GBAP1 PEX19 PPFIA4 ANKS1B NUP133                   |                      |                  |                     |
| TMEM18                                           | RPS7 C2orf28 MEMO1 GFPT1 SFXN5 CHCHD5 PTPN4 MAP3K2 NCKAP1                  |                      |                  |                     |
| SATB2                                            | RAB17 XPC ACAA1 SPCS1 RPL10AP6 CNTN3 PVRL3-AS1                             |                      |                  |                     |
| SPICE1                                           | ZMAT3 CHRD EXOSC9 NDUFC1 NSA2 COX7C CTD P4HA2 SEPT8 IK                     |                      |                  |                     |
| CPEB4                                            | ARL10 TMEM14B BTN2A3P GPANK1 DDAH2 RPS18 RPS10 RPL10A RPL24P4              |                      |                  |                     |
| MRPL2                                            | VEGFA MRPS12 PSMB1 C7orf50 MICALL2 TOMM7 DPY19L1 GTF2I C7orf59             |                      |                  |                     |
| PMS2P1                                           | MUC3A ARF5 MRPS33 SLC4A2 CHCHD7 DECR1 C9orf123 RPS6                        |                      |                  |                     |
| CHMP5                                            | NUDT2 FAM219A VPS13A FSD1L VAV2 EDF1 RP13 USMG5 OCRL                       |                      |                  |                     |
| EIF3M                                            | ALKBH3 PLCB3 UCP2 USP35 C11orf1 ATP5L CACNA1C-AS1 LEPREL2                  |                      |                  |                     |
| ADCY6                                            | CACNB3 LETMD1 DGKA SLC25A3 CNAP4 PEBP1 SETD8 SAP18 RPS7P10                 |                      |                  |                     |
| COMMD6                                           | OXA1L GMPR2 RPS29 DDHD1 SNW1 C14orf2 HERC2P2 HMG2P5 SRP14                  |                      |                  |                     |
| MAPKBP1                                          | DUOX1 RPS3AP6 MAN2A2 GLIS2 UBF1 NSMCE1 FBXL8 KIAA0513                      |                      |                  |                     |
| COX4I1                                           | CYB5D2 LLGL1 RPS7P1 SMARCE1 RPL27 TBKBP1 SLC16A3 CIRBP REEP6               |                      |                  |                     |
| MRPL54                                           | NDUFA7 MYO9B USE1 DPY19L3 FXYD1 ZNF226 SNRPD2 RPL28 RPS5 SNPH              |                      |                  |                     |
| EBF4                                             | VPS16 LINC00493 DTD1 C20orf43 ATP5J CRYZL1 C21orf33                        |                      |                  |                     |
| FAM118A                                          | ARSD EEF1B2P3 UXT FGD1 PDZD11 RPS23P8 PIN4 RPS6KA6                         |                      |                  |                     |
| CXorf56                                          | RP3                                                                        |                      |                  |                     |
| GOBPID                                           | Pvalue OddsRatio ExpCount Count Size Term                                  |                      |                  |                     |
| GO:0006614                                       | 14 105 SRP-dependent cotranslational protein targeting to membrane         | 2.35395294561711e-13 | 20.0945659844742 | 0.893709777870044   |
| GO:0006613                                       | 14 106 cotranslational protein targeting to membrane                       | 2.69299584376163e-13 | 19.8747506980455 | 0.902221299564044   |
| GO:0045047                                       | 14 106 protein targeting to ER                                             | 2.69299584376163e-13 | 19.8747506980455 | 0.902221299564044   |
| GO:0072599                                       | 14 106 establishment of protein localization to endoplasmic reticulum      | 2.69299584376163e-13 | 19.8747506980455 | 0.902221299564044   |
| GO:0070972                                       | 14 118 protein localization to endoplasmic reticulum                       | 1.22070507063295e-12 | 17.5666901905434 | 1.00435955989205    |
| GO:0006612                                       | 15 153 protein targeting to membrane                                       | 3.0908997356395e-12  | 14.2814009661836 | 1.30226281918206    |
| GO:0006414                                       | 13 105 translational elongation                                            | 4.65713112799928e-12 | 18.2873517786561 | 0.893709777870044   |
| GO:0006415                                       | 12 91 translational termination                                            | 1.49929257841184e-11 | 19.4991447143346 | 0.774548474154038   |
| GO:0072594                                       | 16 204 establishment of protein localization to organelle                  | 1.73193862839245e-11 | 11.2467687413005 | 1.73635042557608    |
| GO:0000184                                       | 12 119 nuclear-transcribed mRNA catabolic process, nonsense-mediated decay | 3.69256863969297e-10 | 14.3682748168729 | 1.01287108158605    |
| GO:0006413                                       | 13 152 translational initiation                                            | 5.22731058408295e-10 | 12.0638979725311 | 1.29375129748806    |
| GO:0000956                                       | 13 169 nuclear-transcribed mRNA catabolic process                          | 1.94036717768034e-09 | 10.7363636363636 | 1.43844716628607    |
| GO:0034623                                       | 13 174 cellular macromolecular complex disassembly                         | 2.77379799910712e-09 | 10.3992659514399 | 1.48100477475607    |
| GO:0006402                                       | 13 178 mRNA catabolic process                                              | 3.66104137082604e-09 | 10.1442975206612 | 1.51505086153207    |
| GO:0032984                                       | 13 179 macromolecular complex disassembly                                  | 3.91970579103365e-09 | 10.0824753559693 | 1.52356238322607    |
| GO:0019080                                       | 12 151 viral genome expression                                             | 5.80069085687583e-09 | 11.0355823449349 | 1.28523977579406    |
| GO:0019083                                       | 12 151 viral transcription                                                 | 5.80069085687583e-09 | 11.0355823449349 | 1.28523977579406    |
| GO:0043624                                       |                                                                            | 6.73699148366134e-09 | 10.877515813686  | 1.30226281918206 12 |

Stable4\_20PerPair

|                                                  |                                                                         |                  |          |           |                  |          |          |                   |          |
|--------------------------------------------------|-------------------------------------------------------------------------|------------------|----------|-----------|------------------|----------|----------|-------------------|----------|
| 153                                              | cellular protein complex disassembly                                    |                  |          |           |                  |          |          |                   |          |
| GO:0043241                                       | 9.70034631340651e-09                                                    | 10.5012958163643 |          |           |                  |          |          | 1.34482042765207  |          |
| 12                                               | 158 protein complex disassembly                                         |                  |          |           |                  |          |          |                   |          |
| GO:0006401                                       | 2.01161612809203e-08                                                    | 8.70113636363636 |          |           |                  |          |          | 1.74486194727009  |          |
| 13                                               | 205 RNA catabolic process                                               |                  |          |           |                  |          |          |                   |          |
| GO:0071843                                       | 1.22741358088792e-07                                                    | 7.37433628318584 |          |           |                  |          |          | 2.0342536848661   | 13       |
| 239                                              | cellular component biogenesis at cellular level                         |                  |          |           |                  |          |          |                   |          |
| GO:0019058                                       | 6.30297826240347e-07                                                    | 6.96482784154017 |          |           |                  |          |          | 1.9661615113141   | 12       |
| 231                                              | viral infectious cycle                                                  |                  |          |           |                  |          |          |                   |          |
| GO:0071845                                       | 8.84326593732462e-07                                                    | 6.13019121100302 |          |           |                  |          |          | 2.41727216109612  |          |
| 13                                               | 284 cellular component disassembly at cellular level                    |                  |          |           |                  |          |          |                   |          |
| GO:0022411                                       | 1.03484073380331e-06                                                    | 6.03930578512397 |          |           |                  |          |          | 2.45131824787212  |          |
| 13                                               | 288 cellular component disassembly                                      |                  |          |           |                  |          |          |                   |          |
| GO:0022415                                       | 2.18850039024828e-06                                                    | 6.13775065387969 |          |           |                  |          |          | 2.21299564044011  |          |
| 12                                               | 260 viral reproductive process                                          |                  |          |           |                  |          |          |                   |          |
| GO:0033365                                       | 2.54245048213041e-06                                                    | 4.53866132231743 |          |           |                  |          |          | 4.0259497612622   | 16       |
| 473                                              | protein localization to organelle                                       |                  |          |           |                  |          |          |                   |          |
| GO:0006605                                       | 2.61261196657949e-06                                                    | 4.52842509080521 |          |           |                  |          |          | 4.0344612829562   | 16       |
| 474                                              | protein targeting                                                       |                  |          |           |                  |          |          |                   |          |
| GO:0022613                                       | 3.41149192836991e-06                                                    | 6.47755340453939 |          |           |                  |          |          | 1.91509238115009  |          |
| 11                                               | 225 ribonucleoprotein complex biogenesis                                |                  |          |           |                  |          |          |                   |          |
| GO:0015980                                       | 1.19544966232335e-05                                                    | 5.14264773247824 |          |           |                  |          |          | 2.61303716005813  |          |
| 12                                               | 307 energy derivation by oxidation of organic compounds                 |                  |          |           |                  |          |          |                   |          |
| GO:0022904                                       | 1.73595233003197e-05                                                    | 9.65449438202247 |          |           |                  |          |          | 0.81710608262404  |          |
| 7                                                | 96 respiratory electron transport chain                                 |                  |          |           |                  |          |          |                   |          |
| Tissue: whole_Blood=>Artery_Tibial Type: cluster |                                                                         |                  |          |           |                  |          |          |                   |          |
| SourceGene: MED24(ENSG00000008838.11)            |                                                                         |                  |          |           |                  |          |          |                   |          |
| TargetGeneSet:                                   | RPL22                                                                   | ATPIF1           | NDUFS5   | C1orf50   | MAGOH            | RP11     | PSMB4    | RPS27             | DPM3     |
| SNRPE                                            | CAPN2                                                                   | RPL35P1          | ACP1     | MPHOSPH10 | RNF181           | CHCHD5   | BRK1     | C3orf37           |          |
| GRPEL1                                           | MED10                                                                   | BRIX1            | COX7C    | RIOK2     | CTD              | RP1      | ZNRD1    | GPANK1            | RPL10A   |
| MRPL2                                            | COX7A2                                                                  | C6orf203         |          | MRPS12    | FTSJ2            | PMS2CL   | TOMM7    | YAE1D1            | SEC61G   |
| CHCHD2                                           | BUD31                                                                   | E7orf59          | R3HCC1   | BRF2      | RPL7             | VPS13B   | EBAG9    | EIF3H             | EDF1     |
| AGAP11                                           | TSSC4                                                                   | EIF3F            | GSTP1    | C11orf1   | ATP5L            | CACNB3   | SLC9A7P1 |                   | RPL18AP3 |
| ARL6IP4                                          | SAP18                                                                   | CHMP4B           | RPS29    | SLIRP     | NDUFB1           | GLRX5    | C14orf2  | SIVA1             | SRP14    |
| RSL24D1                                          | SNRNP25                                                                 | C16orf91         |          | ECI1      | TRAPPC2L         |          | RPL27    | UTP18             | COIL     |
| UQCR11                                           | ZNF554                                                                  | MRPL54           | TIMM44   | NDUFA7    | PIN1             | C19orf42 |          | FXDY1             | ZNF568   |
| SNRPD2                                           | SEPW1                                                                   | A1BG             | RPS5     | MRPS26    | LINC00493        |          | ATP5J    | PIGP              | THAP7    |
| MAPK1                                            | C22orf32                                                                |                  | RAB40A   |           |                  |          |          |                   |          |
| GOBPID                                           | Pvalue                                                                  | OddsRatio        | ExpCount | Count     | Size             | Term     |          |                   |          |
| GO:0072594                                       | 3.31379968836637e-10                                                    | 14.778125        |          |           | 1.01640024911771 |          |          |                   | 12       |
| 204                                              | establishment of protein localization to organelle                      |                  |          |           |                  |          |          |                   |          |
| GO:0006614                                       | 2.31969129398839e-09                                                    | 21.2544642857143 |          |           |                  |          |          | 0.523147187045879 |          |
| 9                                                | 105 SRP-dependent cotranslational protein targeting to membrane         |                  |          |           |                  |          |          |                   |          |
| GO:0006613                                       | 2.52494744947732e-09                                                    | 21.0338733431517 |          |           |                  |          |          | 0.528129541208221 |          |
| 9                                                | 106 cotranslational protein targeting to membrane                       |                  |          |           |                  |          |          |                   |          |
| GO:0045047                                       | 2.52494744947732e-09                                                    | 21.0338733431517 |          |           |                  |          |          | 0.528129541208221 |          |
| 9                                                | 106 protein targeting to ER                                             |                  |          |           |                  |          |          |                   |          |
| GO:0072599                                       | 2.52494744947732e-09                                                    | 21.0338733431517 |          |           |                  |          |          | 0.528129541208221 |          |
| 9                                                | 106 establishment of protein localization to endoplasmic reticulum      |                  |          |           |                  |          |          |                   |          |
| GO:0070972                                       | 6.55689224613394e-09                                                    | 18.7024901703801 |          |           |                  |          |          | 0.587917791156321 |          |
| 9                                                | 118 protein localization to endoplasmic reticulum                       |                  |          |           |                  |          |          |                   |          |
| GO:0006414                                       | 4.83291413978044e-08                                                    | 18.4046391752577 |          |           |                  |          |          | 0.523147187045879 |          |
| 8                                                | 105 translational elongation                                            |                  |          |           |                  |          |          |                   |          |
| GO:0006413                                       | 6.01280058429219e-08                                                    | 14.2217782217782 |          |           |                  |          |          | 0.757317832675939 |          |
| 9                                                | 152 translational initiation                                            |                  |          |           |                  |          |          |                   |          |
| GO:0006612                                       | 6.3634435923876e-08                                                     | 14.1220238095238 |          |           |                  |          |          | 0.762300186838281 |          |
| 9                                                | 153 protein targeting to membrane                                       |                  |          |           |                  |          |          |                   |          |
| GO:0000184                                       | 1.28622128383345e-07                                                    | 16.0675675675676 |          |           |                  |          |          | 0.592900145318663 |          |
| 8                                                | 119 nuclear-transcribed mRNA catabolic process, nonsense-mediated decay |                  |          |           |                  |          |          |                   |          |
| GO:0000956                                       | 1.49643787481541e-07                                                    | 12.6955357142857 |          |           |                  |          |          | 0.842017853435748 |          |
| 9                                                | 169 nuclear-transcribed mRNA catabolic process                          |                  |          |           |                  |          |          |                   |          |
| GO:0006402                                       | 2.32952248574824e-07                                                    | 12.0118343195266 |          |           |                  |          |          | 0.886859040896824 |          |
| 9                                                | 178 mRNA catabolic process                                              |                  |          |           |                  |          |          |                   |          |

Stable4\_20PerPair

|                                    |                                                 |                  |                     |
|------------------------------------|-------------------------------------------------|------------------|---------------------|
| GO:0006415                         | 3.28291819940666e-07                            | 18.3269230769231 | 0.453394228773095   |
| 7 91                               | translational termination                       |                  |                     |
| GO:0022904                         | 4.74001401796263e-07                            | 17.2912705272256 | 0.478305999584804   |
| 7 96                               | respiratory electron transport chain            |                  |                     |
| GO:0033365                         | 5.10693945824097e-07                            | 6.6671702284451  | 2.35665351878763 13 |
| 473                                | protein localization to organelle               |                  |                     |
| GO:0006605                         | 5.23063420198314e-07                            | 6.65222986139196 | 2.36163587294997    |
| 13 474                             | protein targeting                               |                  |                     |
| GO:0006401                         | 7.6718164493642e-07                             | 10.3374635568513 | 1.02138260328005    |
| 9 205                              | RNA catabolic process                           |                  |                     |
| GO:0022613                         | 1.66498998425485e-06                            | 9.36706349206349 | 1.12102968652688    |
| 9 225                              | ribonucleoprotein complex biogenesis            |                  |                     |
| GO:0071843                         | 2.73842229720722e-06                            | 8.78819875776398 | 1.19078264479967    |
| 9 239                              | cellular component biogenesis at cellular level |                  |                     |
| GO:0022900                         | 4.49330549730544e-06                            | 12.0852816474864 | 0.667635457753789   |
| 7 134                              | electron transport chain                        |                  |                     |
| GO:0045333                         | 6.59343012241467e-06                            | 11.362735042735  | 0.707494291052522 7 |
| 142                                | cellular respiration                            |                  |                     |
| GO:0019080                         | 9.8734089327833e-06                             | 10.6458333333333 | 0.752335478513598   |
| 7 151                              | viral genome expression                         |                  |                     |
| GO:0019083                         | 9.8734089327833e-06                             | 10.6458333333333 | 0.752335478513598   |
| 7 151                              | viral transcription                             |                  |                     |
| GO:0043624                         | 1.0761109893349e-05                             | 10.4985247629083 | 0.762300186838281   |
| 7 153                              | cellular protein complex disassembly            |                  |                     |
| GO:0043241                         | 1.32738544957744e-05                            | 10.14732552216   | 0.78721195764999 7  |
| 158                                | protein complex disassembly                     |                  |                     |
| Tissue: whole_Blood=>Artery_Tibial | Type: asymmetric                                |                  |                     |
| SourceGene:                        | NCCRP1(ENSG00000188505.3)                       |                  |                     |
| TargetGeneSet:                     | SPEN                                            | FBXO42           | WASF2               |
| BOLA3                              | UXS1                                            | MTX2             | U6                  |
| WDR19                              | ANKRD20A17P                                     | CICP16           | NDUFC1              |
| EEF1E1                             | LRRC16A                                         | HCG23            | UBR2                |
| PMS2P1                             | TRIM56                                          | NAT2             | COX6C               |
| KIAA0913                           | URO5                                            | METTL15          | NUMA1               |
| MED13L                             | DENR                                            | ULK1             | POLE                |
| NUTF2                              | PSMB10                                          | SLC12A4          | GLG1                |
| NDUFA13                            | CYP2A7                                          | FKBP1A           | MAVS                |
| SBF1                               | SYAP1                                           | ACTG1P10         | COX7B               |
| GOBPID                             | Pvalue                                          | OddsRatio        | ExpCount            |
| GO:0022904                         | 1.18070954806934e-08                            | 22.4090909090909 | Count               |
| 8 96                               | respiratory electron transport chain            |                  | Size                |
| GO:0022900                         | 1.61923684969259e-07                            | 15.6091954022988 | Term                |
| 8 134                              | electron transport chain                        |                  |                     |
| GO:0045333                         | 2.53300312874695e-07                            | 14.6690684508492 | 0.43844716628607    |
| 8 142                              | cellular respiration                            |                  |                     |
| GO:0018023                         | 3.14349433431358e-06                            | 171.202380952381 | 0.61199916960764    |
| 3 7                                | peptidyl-lysine trimethylation                  |                  |                     |
| Tissue: whole_Blood=>Artery_Tibial | Type: cluster                                   |                  |                     |
| SourceGene:                        | NCCRP1(ENSG00000188505.3)                       |                  |                     |
| TargetGeneSet:                     | SPEN                                            | FBXO42           | WASF2               |
| BOLA3                              | UXS1                                            | MTX2             | U6                  |
| WDR19                              | ANKRD20A17P                                     | CICP16           | NDUFC1              |
| EEF1E1                             | LRRC16A                                         | HCG23            | UBR2                |
| PMS2P1                             | TRIM56                                          | NAT2             | COX6C               |
| KIAA0913                           | URO5                                            | METTL15          | NUMA1               |
| MED13L                             | DENR                                            | ULK1             | POLE                |
| NUTF2                              | PSMB10                                          | SLC12A4          | GLG1                |
| NDUFA13                            | CYP2A7                                          | FKBP1A           | MAVS                |
| SBF1                               | SYAP1                                           | ACTG1P10         | COX7B               |
| GOBPID                             | Pvalue                                          | OddsRatio        | ExpCount            |
| GO:0022904                         | 1.18070954806934e-08                            | 22.4090909090909 | Count               |
| 8 96                               | respiratory electron transport chain            |                  | Size                |
| GO:0022900                         | 1.61923684969259e-07                            | 15.6091954022988 | Term                |
|                                    |                                                 |                  |                     |

STable4\_20PerPair

|                                    |          |                                                      |                  |                   |              |                    |           |           |                   |
|------------------------------------|----------|------------------------------------------------------|------------------|-------------------|--------------|--------------------|-----------|-----------|-------------------|
| 8                                  | 134      | electron transport chain                             |                  |                   |              |                    |           |           |                   |
| GO:0045333                         |          | 2.53300312874695e-07                                 | 14.6690684508492 |                   |              |                    |           |           | 0.648536433464812 |
| 8                                  | 142      | cellular respiration                                 |                  |                   |              |                    |           |           |                   |
| GO:0018023                         |          | 3.14349433431358e-06                                 | 171.202380952381 |                   |              |                    |           |           | 0.031970105875026 |
| 3                                  | 7        | peptidyl-lysine trimethylation                       |                  |                   |              |                    |           |           |                   |
| Tissue: whole_Blood=>Artery_Tibial |          | Type: asymmetric                                     |                  |                   |              |                    |           |           |                   |
| SourceGene:                        |          | PCBP1(ENSG00000169564.5)                             |                  |                   |              |                    |           |           |                   |
| TargetGeneSet:                     |          | ATPIF1                                               | SLC16A1          | DPM3              | NAV1         | RP11               | MAPKAPK2  |           | RPL35P1           |
| CHRM3-AS2                          |          | STEAP3                                               | PDE11A           | ARMC9             | LSM3         | C3orf78            | CNTN3     | PDGFC     | GLRB CTD          |
| ANKH                               | DAB2     | MAN2A1                                               | CPEB4            | ECI2              | COX6A1P2     |                    | SLC29A1   | COX7A2    | TRAF3IP2          |
| GJA1                               | HDAC7    | AEBP1                                                | AUTS2            | CHCHD7            | DECR1        | COX6C              | C9orf123  |           | C9orf133          |
| PLXDC2                             | HK1      | USMG5                                                | POLR2L           | NAV2              | ODZ4         | ATP5L              | CLMP      | ADCY6     | SAP18             |
| RPS29                              | ERH      | NDUFB1                                               | C14orf2          | THBS1             | SRP14        | MYEF2              | ALPK3     | EIF3C     | BCAR1             |
| MMP28                              | TOB1     | UQCR11                                               | NDUFA7           | PIN1              | NDUFA13      | EPS8L1             | ROMO1     | ATP5E     | ATP5J             |
| RBFOX2                             | RP6      | PIN4                                                 | NDUFA1           | GRIA3             |              |                    |           |           |                   |
| GOBPID                             | Pvalue   | OddsRatio                                            | ExpCount         | Count             | Size         | Term               |           |           |                   |
| GO:0022904                         |          | 7.14548993627377e-11                                 | 32.8965517241379 |                   |              | 0.358729499688603  |           |           |                   |
| 9                                  | 96       | respiratory electron transport chain                 |                  |                   |              |                    |           |           |                   |
| GO:0022900                         |          | 1.44440940593033e-09                                 | 22.8352          | 0.500726593315342 |              |                    | 9         |           | 134               |
| electron transport chain           |          |                                                      |                  |                   |              |                    |           |           |                   |
| GO:0045333                         |          | 2.41768474624567e-09                                 | 21.4496240601504 |                   |              | 0.530620718289392  |           |           |                   |
| 9                                  | 142      | cellular respiration                                 |                  |                   |              |                    |           |           |                   |
| GO:0006091                         |          | 4.34195864528954e-08                                 | 9.60233516483516 |                   |              | 1.59933568611169   |           |           |                   |
| 12                                 | 428      | generation of precursor metabolites and energy       |                  |                   |              |                    |           |           |                   |
| GO:0015980                         |          | 1.69250226508262e-07                                 | 10.7897153351699 |                   |              | 1.14718704587918   |           |           |                   |
| 10                                 | 307      | energy derivation by oxidation of organic compounds  |                  |                   |              |                    |           |           |                   |
| GO:0042776                         |          | 1.37381713630155e-05                                 | 84.6294117647059 |                   |              | 0.0485779530828316 |           |           |                   |
| 3                                  | 13       | mitochondrial ATP synthesis coupled proton transport |                  |                   |              |                    |           |           |                   |
| Tissue: whole_Blood=>Artery_Tibial |          | Type: cluster                                        |                  |                   |              |                    |           |           |                   |
| SourceGene:                        |          | PISD(ENSG00000241878.4)                              |                  |                   |              |                    |           |           |                   |
| TargetGeneSet:                     |          | NPHP4                                                | SPEN             | RP11              | UBR4         | ATPIF1             | SRSF4     | ZCCHC17   | INPP5B            |
| SCMH1                              | PPCS     | RPS8                                                 | NSUN4            | SCP2              | ACOT11       | JAK1               | PIGK      | RWDD3     | HBXIP             |
| LRIG2                              | S100A6   | UBQLN4                                               | SMG5             | ARHGEF11          |              | BRP44              | CEP350    | TSEN15    | C1orf132          |
| NSL1                               | ARV1     | AHCTF1                                               | PQLC3            | PTRHD1            | SLC5A6       | C2orf28            | RPLP0P6   | MORN2     | CALM2             |
| COMMD1                             | MDH1     | SUCLG1                                               | RNF181           | SNRNP200          |              | SMPD4              | DAPL1     | BTF3L4P2  |                   |
| NDUFB3                             | TTLL4    | SETD5                                                | TATDN2           | LSM3              | SCAP         | SPCS1              | PDHB      | LRRC34    | LETM1             |
| SLC30A9                            | TMSB4XP8 |                                                      | LAMTOR3          | PPA2              | HIGD1AP14    |                    | NDUFC1    | MGST2     | SUB1              |
| NIPBL                              | COX7C    | CTD                                                  | RFESD            | HINT1             | PDF          | ATOX1              | TTC1      | ARL10     | TMEM14C           |
| TMEM14B                            | ABCF1    | BAG6                                                 | RPS18            | RP3               | BRPF3        | XPO5               | SLC29A1   | COX7A2    | WDR11             |
| ECHDC1                             | MRPS12   | RP1                                                  | HIVEP2           | ZDHHC14           | RP4          | PSMB1              | FBXL18    | RPA3      | NDUFA4            |
| SEPT7                              | EPDR1    | SPDYE1                                               | CHCHD2           | POM121C           | PMS2P1       | TRIM56             | RABL5     | ARF5      | C7orf73           |
| MRPS33                             | VDAC3    | CHCHD7                                               | DECR1            | COX6C             | C9orf123     |                    | MPDZ      | LINC00032 |                   |
| NDUFB6                             | CHMP5    | DCTN3                                                | SNX18P3          | FAM27D1           | KIF27        | TSTD2              | TXN       | ATP6V1G1  |                   |
| ZNF79                              | FAM102A  | CIZ1                                                 | HMGAI1P4         | SETX              | FAM208B      | SEC24C             | KIAA0913  |           | RP13 LGI1         |
| DPCD                               | USMG5    | PDCD11                                               | PHRF1            | CYB5R2            | AKIP1        | NAV2-AS2           | IMMP1L    | ELP4      |                   |
| NAT10                              | INCENP   | NXF1                                                 | MARK2            | KLC2              | BBS1         | KDM2A              | LAMTOR1   | ARHGEF17  |                   |
| CLNS1A                             | TAGLN    | ATP5L                                                | IGSF9B           | NCAPD3            | CACNA1C-AS2  |                    | ADCY6     | POU6F1    | SRGAP1            |
| NDUFA12                            | CCDC53   | NUP37                                                | RBM19            | RPLP0             | POP5         | KDM2B              | POLE      | POMP      | RFXAP DGKH        |
| MED4                               | COMMD6   | A2LD1                                                | RASA3            | ACIN1             | C14orf166    |                    | HEATR4    | MLH3      | NDUFB1            |
| C14orf2                            | KIAA0284 |                                                      | SRP14            | MAPKBP1           | DYX1C1-CCPG1 |                    | GTF2A2    | KIAA0101  |                   |
| RAB11A                             | RPLP1    | MYO9A                                                | WDR61            | C15orf40          |              | ZNF592             | KIF7      | RPL36AP43 |                   |
| MAN2A2                             | ZNF598   | CREBBP                                               | CLEC16A          | PDXDC1            | SRCAP        | RNF40              | ITFG1     | EDC4      | SLC12A4 AARS      |
| FBXO31                             | ZC3H18   | VPS53                                                | MINK1            | LSMD1             | AURKB        | STX8               | FLCN      | SUPT6H    | MMP28             |
| MLLT6                              | TOP2A    | SMARCE1                                              | STAT5B           | STAT3             | HSD17B1P1    |                    | ICT1      | UNK       | UBE2O             |
| TNRC6C                             | USP36    | MYL12B                                               | ZNF397           | EPG5              | CYB5A        | UQCR11             | DOT1L     | NDUFA11   | TRAPPC5           |
| NDUFA7                             | ZNF317   | PIN1                                                 | KRI1             | TNPO2             | NDUFB7       | MYO9B              | NDUFA13   | RPSAP58   | MLL4              |
| SAMD4B                             | SYMPK    | ZNF841                                               | ZNF417           | RPS5              | EBF4         | MAVS               | SNRPB2    | DTD1      | ZNF334            |
| ZNFX1                              | PFDN4    | RPL12P4                                              | C20orf43         |                   | ATP5E        | PPIAP22            | LINC00515 |           | ATP5J             |
| SCAF4                              | URB1     | LRRC3-AS1                                            |                  | MCM3AP            | DIP2A        | MTMR3              | CTA       | GTPBP1    | TTLL12 SBF1       |
| TAB3-AS1                           |          | ATP6AP2                                              | RPS2P55          | FUNDC1            | UBA1         | PAGE2B             | PDZD11    | PIN4      | COX7B             |
| RPSAP9                             | NGFRAP1  | NDUFA1                                               | VAMP7            | MT                |              |                    |           |           |                   |
| GOBPID                             | Pvalue   | OddsRatio                                            | ExpCount         | Count             | Size         | Term               |           |           |                   |
| GO:0045333                         |          | 3.07183877498828e-15                                 | 12.3687703481092 |                   |              | 2.15196180195142   |           |           |                   |



STable4\_20PerPair

|                                    |         |                                                        |                  |                  |         |              |        |                    |         |
|------------------------------------|---------|--------------------------------------------------------|------------------|------------------|---------|--------------|--------|--------------------|---------|
| 21                                 | 142     | cellular respiration                                   |                  |                  |         |              |        |                    |         |
| GO:0022904                         |         | 4.24854673243702e-15                                   | 16.2502870264064 |                  |         |              |        | 1.45484741540378   |         |
| 18                                 | 96      | respiratory electron transport chain                   |                  |                  |         |              |        |                    |         |
| GO:0022900                         |         | 1.20300542110449e-14                                   | 12.4464427400159 |                  |         |              |        | 2.03072451733444   |         |
| 20                                 | 134     | electron transport chain                               |                  |                  |         |              |        |                    |         |
| GO:0015980                         |         | 2.74983792662288e-10                                   | 5.76322219028456 |                  |         |              |        | 4.65248079717667   |         |
| 23                                 | 307     | energy derivation by oxidation of organic compounds    |                  |                  |         |              |        |                    |         |
| GO:0006091                         |         | 1.67109622141055e-09                                   | 4.6345990255974  | 6.48619472700851 |         |              |        |                    | 26      |
| 428                                |         | generation of precursor metabolites and energy         |                  |                  |         |              |        |                    |         |
| GO:0006120                         |         | 5.14275840883601e-08                                   | 19.2335815842925 |                  |         |              |        | 0.545567780776417  |         |
| 8                                  | 36      | mitochondrial electron transport, NADH to ubiquinone   |                  |                  |         |              |        |                    |         |
| GO:0042773                         |         | 4.63091380783589e-07                                   | 13.7980313525337 |                  |         |              |        | 0.712269047124766  |         |
| 8                                  | 47      | ATP synthesis coupled electron transport               |                  |                  |         |              |        |                    |         |
| GO:0042775                         |         | 4.63091380783589e-07                                   | 13.7980313525337 |                  |         |              |        | 0.712269047124766  |         |
| 8                                  | 47      | mitochondrial ATP synthesis coupled electron transport |                  |                  |         |              |        |                    |         |
| GO:0006119                         |         | 2.44649806854381e-06                                   | 10.7541232227488 |                  |         |              |        | 0.878970313473116  |         |
| 8                                  | 58      | oxidative phosphorylation                              |                  |                  |         |              |        |                    |         |
| Tissue: whole_Blood=>Artery_Tibial |         | Type: asymmetric                                       |                  |                  |         |              |        |                    |         |
| SourceGene:                        |         | RP11-403P17.2(ENSG00000260650.1)                       |                  |                  |         |              |        |                    |         |
| TargetGeneSet:                     |         | C1orf122                                               | PPCS             | MAGOH            | USP24   | HBXIP        | ARV1   | OST4               |         |
| MORN2                              | MDH1    | BOLA3                                                  | NIF3L1           | NDUFB3           | MYEOV2  | BRK1         | CMC1   | SPTSSB             | MRPL47  |
| NDUFC1                             | PDCD6   | SLC9A3                                                 | C5orf43          | COMMD10          | ATOX1   | FAM114A2     |        | COX6A1P2           |         |
| COX7A2                             | WDR11   | RPA3                                                   | NDUFA4           | MPLKIP           | SEC61G  | PMS2P1       | ZNHIT1 | C7orf73            | TCEB1   |
| DECR1                              | COX6C   | HAS2                                                   | C9orf123         |                  | NDUFB6  | SEC61B       | RP11   | UROS               | IMMP1L  |
| TMEM126B                           |         | TMEM126A                                               | ATP5L            | HIGD1AP1         |         | NDUFA12      | CCDC53 | POP5               | DENR    |
| ULK1                               | ERH     | SLIRP                                                  | NDUFB1           | ATG2B            | C14orf2 | DYX1C1-CCPG1 | GTF2A2 | ANKRD11            |         |
| TXNDC17                            | ICT1    | NDUFA7                                                 | PIN1             | NDUFB7           | NDUFA13 | COX7A1       | SNRPD2 | ATP5E              | PPIAP22 |
| ATP5J                              | FAM104B | PDZD11                                                 | COX7B            | NXT2             | NDUFA1  | C1GALT1C1    |        |                    |         |
| GOBPID                             | Pvalue  | OddsRatio                                              | ExpCount         | Count            | Size    | Term         |        |                    |         |
| GO:0022904                         |         | 2.1771608472011e-20                                    | 60.2314814814815 |                  |         |              |        | 0.391945194104214  |         |
| 15                                 | 96      | respiratory electron transport chain                   |                  |                  |         |              |        |                    |         |
| GO:0045333                         |         | 2.43668636871758e-19                                   | 42.1291989664083 |                  |         |              |        | 0.57975226627915   |         |
| 16                                 | 142     | cellular respiration                                   |                  |                  |         |              |        |                    |         |
| GO:0022900                         |         | 4.07883718536453e-18                                   | 40.8890374331551 |                  |         |              |        | 0.547090166770466  |         |
| 15                                 | 134     | electron transport chain                               |                  |                  |         |              |        |                    |         |
| GO:0015980                         |         | 5.61468734236273e-14                                   | 18.0305282506194 |                  |         |              |        | 1.25340806864577   |         |
| 16                                 | 307     | energy derivation by oxidation of organic compounds    |                  |                  |         |              |        |                    |         |
| GO:0006091                         |         | 6.71170885717984e-13                                   | 13.7687985169737 |                  |         |              |        | 1.74742232371462   |         |
| 17                                 | 428     | generation of precursor metabolites and energy         |                  |                  |         |              |        |                    |         |
| GO:0006120                         |         | 1.30518094614004e-12                                   | 80.4705882352941 |                  |         |              |        | 0.14697944778908   |         |
| 8                                  | 36      | mitochondrial electron transport, NADH to ubiquinone   |                  |                  |         |              |        |                    |         |
| GO:0042773                         |         | 1.31017536476418e-11                                   | 57.7295123177476 |                  |         |              |        | 0.191889834613522  |         |
| 8                                  | 47      | ATP synthesis coupled electron transport               |                  |                  |         |              |        |                    |         |
| GO:0042775                         |         | 1.31017536476418e-11                                   | 57.7295123177476 |                  |         |              |        | 0.191889834613522  |         |
| 8                                  | 47      | mitochondrial ATP synthesis coupled electron transport |                  |                  |         |              |        |                    |         |
| GO:0006119                         |         | 7.71454992997175e-11                                   | 44.9945098039216 |                  |         |              |        | 0.236800221437963  |         |
| 8                                  | 58      | oxidative phosphorylation                              |                  |                  |         |              |        |                    |         |
| GO:0042776                         |         | 1.79589970093787e-05                                   | 77.0464285714286 |                  |         |              |        | 0.0530759117016123 |         |
| 3                                  | 13      | mitochondrial ATP synthesis coupled proton transport   |                  |                  |         |              |        |                    |         |
| Tissue: whole_Blood=>Artery_Tibial |         | Type: cluster                                          |                  |                  |         |              |        |                    |         |
| SourceGene:                        |         | RP11-403P17.2(ENSG00000260650.1)                       |                  |                  |         |              |        |                    |         |
| TargetGeneSet:                     |         | C1orf122                                               | PPCS             | MAGOH            | USP24   | HBXIP        | ARV1   | OST4               |         |
| MORN2                              | MDH1    | BOLA3                                                  | NIF3L1           | NDUFB3           | MYEOV2  | BRK1         | CMC1   | SPTSSB             | MRPL47  |
| NDUFC1                             | PDCD6   | SLC9A3                                                 | C5orf43          | COMMD10          | ATOX1   | FAM114A2     |        | COX6A1P2           |         |
| COX7A2                             | WDR11   | RPA3                                                   | NDUFA4           | MPLKIP           | SEC61G  | PMS2P1       | ZNHIT1 | C7orf73            | TCEB1   |
| DECR1                              | COX6C   | HAS2                                                   | C9orf123         |                  | NDUFB6  | SEC61B       | RP11   | UROS               | IMMP1L  |
| TMEM126B                           |         | TMEM126A                                               | ATP5L            | HIGD1AP1         |         | NDUFA12      | CCDC53 | POP5               | DENR    |
| ULK1                               | ERH     | SLIRP                                                  | NDUFB1           | ATG2B            | C14orf2 | DYX1C1-CCPG1 | GTF2A2 | ANKRD11            |         |
| TXNDC17                            | ICT1    | NDUFA7                                                 | PIN1             | NDUFB7           | NDUFA13 | COX7A1       | SNRPD2 | ATP5E              | PPIAP22 |
| ATP5J                              | FAM104B | PDZD11                                                 | COX7B            | NXT2             | NDUFA1  | C1GALT1C1    |        |                    |         |
| GOBPID                             | Pvalue  | OddsRatio                                              | ExpCount         | Count            | Size    | Term         |        |                    |         |
| GO:0022904                         |         | 2.1771608472011e-20                                    | 60.2314814814815 |                  |         |              |        | 0.391945194104214  |         |
| 15                                 | 96      | respiratory electron transport chain                   |                  |                  |         |              |        |                    |         |

Stable4\_20PerPair

|                                                  |                      |                                                        |                      |                  |                   |                                                                |          |        |         |
|--------------------------------------------------|----------------------|--------------------------------------------------------|----------------------|------------------|-------------------|----------------------------------------------------------------|----------|--------|---------|
| GO:0045333                                       | 2.43668636871758e-19 | 42.1291989664083                                       | 0.57975226627915     |                  |                   |                                                                |          |        |         |
| 16                                               | 142                  | cellular respiration                                   |                      |                  |                   |                                                                |          |        |         |
| GO:0022900                                       | 4.07883718536453e-18 | 40.8890374331551                                       | 0.547090166770466    |                  |                   |                                                                |          |        |         |
| 15                                               | 134                  | electron transport chain                               |                      |                  |                   |                                                                |          |        |         |
| GO:0015980                                       | 5.61468734236273e-14 | 18.0305282506194                                       | 1.25340806864577     |                  |                   |                                                                |          |        |         |
| 16                                               | 307                  | energy derivation by oxidation of organic compounds    |                      |                  |                   |                                                                |          |        |         |
| GO:0006091                                       | 6.71170885717984e-13 | 13.7687985169737                                       | 1.74742232371462     |                  |                   |                                                                |          |        |         |
| 17                                               | 428                  | generation of precursor metabolites and energy         |                      |                  |                   |                                                                |          |        |         |
| GO:0006120                                       | 1.30518094614004e-12 | 80.4705882352941                                       | 0.14697944778908     |                  |                   |                                                                |          |        |         |
| 8                                                | 36                   | mitochondrial electron transport, NADH to ubiquinone   |                      |                  |                   |                                                                |          |        |         |
| GO:0042773                                       | 1.31017536476418e-11 | 57.7295123177476                                       | 0.191889834613522    |                  |                   |                                                                |          |        |         |
| 8                                                | 47                   | ATP synthesis coupled electron transport               |                      |                  |                   |                                                                |          |        |         |
| GO:0042775                                       | 1.31017536476418e-11 | 57.7295123177476                                       | 0.191889834613522    |                  |                   |                                                                |          |        |         |
| 8                                                | 47                   | mitochondrial ATP synthesis coupled electron transport |                      |                  |                   |                                                                |          |        |         |
| GO:0006119                                       | 7.71454992997175e-11 | 44.9945098039216                                       | 0.236800221437963    |                  |                   |                                                                |          |        |         |
| 8                                                | 58                   | oxidative phosphorylation                              |                      |                  |                   |                                                                |          |        |         |
| GO:0042776                                       | 1.79589970093787e-05 | 77.0464285714286                                       | 0.0530759117016123   |                  |                   |                                                                |          |        |         |
| 3                                                | 13                   | mitochondrial ATP synthesis coupled proton transport   |                      |                  |                   |                                                                |          |        |         |
| Tissue: whole_Blood=>Artery_Tibial Type: cluster |                      |                                                        |                      |                  |                   |                                                                |          |        |         |
| SourceGene: RP11-84A14.5(ENSG00000223989.1)      |                      |                                                        |                      |                  |                   |                                                                |          |        |         |
| TargetGeneSet:                                   | TPRG1L               | RP11                                                   | NDUFS5               | RP4              | GTF2B             | BCAS2                                                          | PSMB4    | DPM3   | STX6    |
| MIR4426                                          | RPS7                 | FAHD2A                                                 | MGAT5                | DNPEP            | ZNF385D           | SPCS1                                                          | RPL10AP6 | ZMAT3  |         |
| NDUFC1                                           | SEMA5A               | COX7C                                                  | CTD                  | HINT1            | P4HA2             | TMEM14B                                                        | RPS18    | RPS10  | RPL10A  |
| RPL24P4                                          | MRPL2                | ASCC3                                                  | RP1                  | MRPS12           | TOMM7             | PMS2P1                                                         | ARF5     | NDUFB9 | PUF60   |
| C9orf133                                         |                      | NUDT2                                                  | IER5L                | USMG5            | PEX16             | LAMTOR1                                                        | ATP5L    | FAM60A | PRKAG1  |
| PRR13                                            | PEBP1                | RPS7P10                                                | EAPP                 | RPS29            | ERH               | COQ6                                                           | SLIRP    | NDUFB1 | C14orf2 |
| SRP14                                            | SEC11A               | FAM192A                                                | MIR22HG              | SLC52A1          | ZSWIM7            | MPRIP-AS1                                                      |          | RPS7P1 | SMARCE1 |
| RPL27                                            | SLC16A3              | MADCAM1                                                | UQCR11               | NDUFA7           | NDUFB7            | EID2                                                           | SNRPD2   | NLRP9  | RPS5    |
| LINC00493                                        |                      | ROMO1                                                  | C20orf43             |                  | ATP5J             | U2AF1                                                          | EEF1B2P3 |        | PIN4    |
| CXorf56                                          | NDUFA1               | RP3                                                    | PLAC1                | MTCP1            |                   |                                                                |          |        |         |
| GOBPID                                           | Pvalue               | OddsRatio                                              | ExpCount             | Count            | Size              | Term                                                           |          |        |         |
| GO:0022904                                       | 11                   | 96                                                     | 5.84239041621181e-13 | 33.0439075630252 |                   | 0.445090305169192                                              |          |        |         |
|                                                  |                      |                                                        |                      |                  |                   | respiratory electron transport chain                           |          |        |         |
| GO:0070972                                       | 11                   | 118                                                    | 5.85953004275699e-12 | 26.2094459279039 |                   | 0.547090166770466                                              |          |        |         |
|                                                  |                      |                                                        |                      |                  |                   | protein localization to endoplasmic reticulum                  |          |        |         |
| GO:0022900                                       | 11                   | 134                                                    | 2.37721101989593e-11 | 22.7745354239257 |                   | 0.621271884298664                                              |          |        |         |
|                                                  |                      |                                                        |                      |                  |                   | electron transport chain                                       |          |        |         |
| GO:0045333                                       | 11                   | 142                                                    | 4.47957813120369e-11 | 21.3717284623773 |                   | 0.658362743062764                                              |          |        |         |
|                                                  |                      |                                                        |                      |                  |                   | cellular respiration                                           |          |        |         |
| GO:0006614                                       | 105                  |                                                        | 4.65758776247962e-11 | 26.387811634349  | 0.486817521278804 | 10                                                             |          |        |         |
|                                                  |                      |                                                        |                      |                  |                   | SRP-dependent cotranslational protein targeting to membrane    |          |        |         |
| GO:0006613                                       | 10                   | 106                                                    | 5.12424242892513e-11 | 26.1111111111111 |                   | 0.491453878624317                                              |          |        |         |
|                                                  |                      |                                                        |                      |                  |                   | cotranslational protein targeting to membrane                  |          |        |         |
| GO:0045047                                       | 10                   | 106                                                    | 5.12424242892513e-11 | 26.1111111111111 |                   | 0.491453878624317                                              |          |        |         |
|                                                  |                      |                                                        |                      |                  |                   | protein targeting to ER                                        |          |        |         |
| GO:0072599                                       | 10                   | 106                                                    | 5.12424242892513e-11 | 26.1111111111111 |                   | 0.491453878624317                                              |          |        |         |
|                                                  |                      |                                                        |                      |                  |                   | establishment of protein localization to endoplasmic reticulum |          |        |         |
| GO:0006612                                       | 153                  |                                                        | 1.00755954318332e-10 | 19.7009557344064 |                   | 0.7093626738634                                                | 11       |        |         |
|                                                  |                      |                                                        |                      |                  |                   | protein targeting to membrane                                  |          |        |         |
| GO:0072594                                       | 12                   | 204                                                    | 1.37585044045365e-10 | 16.1272727272727 |                   | 0.945816898484534                                              |          |        |         |
|                                                  |                      |                                                        |                      |                  |                   | establishment of protein localization to organelle             |          |        |         |
| GO:0006120                                       |                      |                                                        | 2.50508621655278e-10 | 57.75            | 0.166908864438447 | 7                                                              | 36       |        |         |
|                                                  |                      |                                                        |                      |                  |                   | mitochondrial electron transport, NADH to ubiquinone           |          |        |         |
| GO:0015980                                       | 13                   | 307                                                    | 1.26395112380204e-09 | 11.5375409423028 |                   | 1.42336170507231                                               |          |        |         |
|                                                  |                      |                                                        |                      |                  |                   | energy derivation by oxidation of organic compounds            |          |        |         |
| GO:0042773                                       | 7                    | 47                                                     | 1.81322448644403e-09 | 41.8366666666667 |                   | 0.217908795239084                                              |          |        |         |
|                                                  |                      |                                                        |                      |                  |                   | ATP synthesis coupled electron transport                       |          |        |         |
| GO:0042775                                       | 7                    | 47                                                     | 1.81322448644403e-09 | 41.8366666666667 |                   | 0.217908795239084                                              |          |        |         |
|                                                  |                      |                                                        |                      |                  |                   | mitochondrial ATP synthesis coupled electron transport         |          |        |         |
| GO:0006091                                       | 14                   | 428                                                    | 7.55600629287101e-09 | 8.91349922523015 |                   | 1.98436094387932                                               |          |        |         |
|                                                  |                      |                                                        |                      |                  |                   | generation of precursor metabolites and energy                 |          |        |         |
| GO:0006119                                       | 58                   |                                                        | 8.3283323725346e-09  | 32.787908496732  | 0.26890872603972  | 7                                                              |          |        |         |
|                                                  |                      |                                                        |                      |                  |                   | oxidative phosphorylation                                      |          |        |         |

Stable4\_20PerPair

|                                            |                      |                                                                     |                                      |                  |        |                   |          |          |        |     |
|--------------------------------------------|----------------------|---------------------------------------------------------------------|--------------------------------------|------------------|--------|-------------------|----------|----------|--------|-----|
| GO:0006414                                 | 2.71359653037751e-08 | 19.9713437008562                                                    | 0.486817521278804                    |                  |        |                   |          |          |        |     |
| 8                                          | 105                  | translational elongation                                            |                                      |                  |        |                   |          |          |        |     |
| GO:0006415                                 | 1.98806726427512e-07 | 19.8611111111111                                                    | 0.42190851844163                     |                  |        |                   |          |          |        |     |
| 7                                          | 91                   | translational termination                                           |                                      |                  |        |                   |          |          |        |     |
| GO:0000184                                 | 1.24253009417208e-06 | 14.8666666666667                                                    | 0.551726524115978                    |                  |        |                   |          |          |        |     |
| 7                                          | 119                  | nuclear-transcribed mRNA catabolic process, nonsense-mediated decay |                                      |                  |        |                   |          |          |        |     |
| GO:0034623                                 | 1.33958056585863e-06 | 11.6136410046968                                                    | 0.806726178119161                    |                  |        |                   |          |          |        |     |
| 8                                          | 174                  | cellular macromolecular complex disassembly                         |                                      |                  |        |                   |          |          |        |     |
| GO:0033365                                 | 1.53598385943145e-06 | 6.58946953263656                                                    | 2.19299702442738                     |                  |        |                   |          |          |        |     |
| 12                                         | 473                  | protein localization to organelle                                   |                                      |                  |        |                   |          |          |        |     |
| GO:0006605                                 | 1.57023409742074e-06 | 6.57473435655254                                                    | 2.19763338177289                     |                  |        |                   |          |          |        |     |
| 12                                         | 474                  | protein targeting                                                   |                                      |                  |        |                   |          |          |        |     |
| GO:0032984                                 | 1.65764254102156e-06 | 11.2700961443156                                                    | 0.829907964846723                    |                  |        |                   |          |          |        |     |
| 8                                          | 179                  | macromolecular complex disassembly                                  |                                      |                  |        |                   |          |          |        |     |
| GO:0019080                                 | 6.08834441710184e-06 | 11.537037037037                                                     | 0.700089959172376                    | 7                |        |                   |          |          |        |     |
| 151                                        |                      | viral genome expression                                             |                                      |                  |        |                   |          |          |        |     |
| GO:0019083                                 | 6.08834441710184e-06 | 11.537037037037                                                     | 0.700089959172376                    | 7                |        |                   |          |          |        |     |
| 151                                        |                      | viral transcription                                                 |                                      |                  |        |                   |          |          |        |     |
| GO:0006413                                 | 6.35906666054627e-06 | 11.4566666666667                                                    | 0.704726316517888                    |                  |        |                   |          |          |        |     |
| 7                                          | 152                  | translational initiation                                            |                                      |                  |        |                   |          |          |        |     |
| GO:0043624                                 | 6.63973181469041e-06 | 11.377397260274                                                     | 0.7093626738634                      | 7                | 153    |                   |          |          |        |     |
|                                            |                      | cellular protein complex disassembly                                |                                      |                  |        |                   |          |          |        |     |
| GO:0043241                                 | 8.20245376989087e-06 | 10.9967991169978                                                    | 0.732544460590963                    |                  |        |                   |          |          |        |     |
| 7                                          | 158                  | protein complex disassembly                                         |                                      |                  |        |                   |          |          |        |     |
| GO:0000956                                 | 1.27355058579536e-05 | 10.2421810699588                                                    | 0.783544391391599                    |                  |        |                   |          |          |        |     |
| 7                                          | 169                  | nuclear-transcribed mRNA catabolic process                          |                                      |                  |        |                   |          |          |        |     |
| GO:0006402                                 | 1.78367876385405e-05 | 9.69697855750487                                                    | 0.825271607501211                    |                  |        |                   |          |          |        |     |
| 7                                          | 178                  | mRNA catabolic process                                              |                                      |                  |        |                   |          |          |        |     |
| Tissue: Nerve_Tibial=>Heart_Left_Ventricle |                      |                                                                     |                                      |                  |        |                   |          |          |        |     |
| SourceGene: AIFM3(ENSG00000183773.10)      |                      |                                                                     |                                      |                  |        |                   |          |          |        |     |
| TargetGeneSet:                             | NUDC                 | NR0B2                                                               | CDC20                                | NEDD4            | RP4    | HSD3BP3           | FAM72B   | SNX18P15 |        |     |
| IQGAP3                                     | USP21                | ASPM                                                                | NEK2                                 | CEP170           | STARD7 | NCAPH             | HJURP    | JAGN1    | KCTD6  |     |
| IFT122                                     | CTA                  | GLRB                                                                | KIF20A                               | CDC25C           | LSM11  | HMMR              | GPANK1   | LY6G6E   | KIFC1  |     |
| MTCH1                                      | FKBP9                | ANLN                                                                | NSUN5                                | POR              | ASB15  | FZD3              | RP11     | MELK     | GKAP1  |     |
| COBRA1                                     | CEP55                | MKI67                                                               | TSSC4                                | CDCA5            | CARNS1 | MPP2              | FANCB    | CGRRF1   | DLGAP5 |     |
| BUB1B                                      | CASC5                | NUSAP1                                                              | KIAA0101                             |                  | PKM2   | FANCI             | C15orf42 | ZNF48    | DEF8   |     |
| GGT6                                       | AURKB                | TOP2A                                                               | KIF18B                               | MRPL45P2         |        | BIRC5             | NDC80    | ASXL3    | SKA1   | CTD |
| MAN2B1                                     | UNC13A               | LGALS4                                                              | SNPH                                 | SIRPG            | TPX2   | UBE2C             | PHEX     | RBM10    | SPIN4  |     |
| GOBPID                                     | Pvalue               | OddsRatio                                                           | ExpCount                             | Count            | Size   | Term              |          |          |        |     |
| GO:0000087                                 | 22                   | 360                                                                 | 5.77840233219617e-20                 | 22.3048058882956 |        | 1.56944156113764  |          |          |        |     |
|                                            |                      |                                                                     | M phase of mitotic cell cycle        |                  |        |                   |          |          |        |     |
| GO:0051301                                 | 23                   | 452                                                                 | 4.18480609018208e-19                 | 18.7096153846154 |        | 1.97052107120614  |          |          |        |     |
|                                            |                      |                                                                     | cell division                        |                  |        |                   |          |          |        |     |
| GO:0000280                                 | 21                   | 350                                                                 | 7.0432102634161e-19                  | 21.3662613981763 |        | 1.52584596221715  |          |          |        |     |
|                                            |                      |                                                                     | nuclear division                     |                  |        |                   |          |          |        |     |
| GO:0007067                                 | 21                   | 350                                                                 | 7.0432102634161e-19                  | 21.3662613981763 |        | 1.52584596221715  |          |          |        |     |
|                                            |                      |                                                                     | mitosis                              |                  |        |                   |          |          |        |     |
| GO:0048285                                 | 21                   | 370                                                                 | 2.21082121499435e-18                 | 20.1131805157593 |        | 1.61303716005813  |          |          |        |     |
|                                            |                      |                                                                     | organelle fission                    |                  |        |                   |          |          |        |     |
| GO:0007059                                 | 14                   | 140                                                                 | 8.25432922759039e-16                 | 32.3401360544218 |        | 0.610338384886859 |          |          |        |     |
|                                            |                      |                                                                     | chromosome segregation               |                  |        |                   |          |          |        |     |
| GO:0010564                                 | 17                   | 414                                                                 | 1.28904743512527e-12                 | 13.0241485050925 |        | 1.80485779530828  |          |          |        |     |
|                                            |                      |                                                                     | regulation of cell cycle process     |                  |        |                   |          |          |        |     |
| GO:0000819                                 | 8                    | 52                                                                  | 5.33240829785879e-11                 | 47.4181818181818 |        | 0.226697114386548 |          |          |        |     |
|                                            |                      |                                                                     | sister chromatid segregation         |                  |        |                   |          |          |        |     |
| GO:0007346                                 | 13                   | 303                                                                 | 4.7916273970545e-10                  | 12.6395862068966 |        | 1.32094664729084  |          |          |        |     |
|                                            |                      |                                                                     | regulation of mitotic cell cycle     |                  |        |                   |          |          |        |     |
| GO:0007017                                 | 14                   | 393                                                                 | 1.07010218486297e-09                 | 10.5608744817188 |        | 1.71330703757525  |          |          |        |     |
|                                            |                      |                                                                     | microtubule-based process            |                  |        |                   |          |          |        |     |
| GO:0000070                                 | 7                    | 49                                                                  | 1.5802192543395e-09                  | 42.6964285714286 |        | 0.213618434710401 |          |          |        |     |
|                                            |                      |                                                                     | mitotic sister chromatid segregation |                  |        |                   |          |          |        |     |
| GO:0000236                                 | 8                    | 85                                                                  | 3.04867722569876e-09                 | 27.0337662337662 |        | 0.370562590824164 |          |          |        |     |
|                                            |                      |                                                                     | mitotic prometaphase                 |                  |        |                   |          |          |        |     |

Stable4\_20PerPair

|            |                      |                                                   |                    |
|------------|----------------------|---------------------------------------------------|--------------------|
| GO:0000910 | 6.83952572361645e-09 | 24.1894291754757                                  | 0.409798629852605  |
| 8          | 94                   | cytokinesis                                       |                    |
| GO:0051313 | 1.48596772101876e-08 | 88.5098522167488                                  | 0.0828316379489309 |
| 5          | 19                   | attachment of spindle microtubules to chromosome  |                    |
| GO:0000226 | 1.98210574086758e-08 | 11.5854203935599                                  | 1.17272161096118   |
| 11         | 269                  | microtubule cytoskeleton organization             |                    |
| GO:0007088 | 1.02282884249281e-07 | 22.0787037037037                                  | 0.383641270500311  |
| 7          | 88                   | regulation of mitosis                             |                    |
| GO:0051783 | 1.02282884249281e-07 | 22.0787037037037                                  | 0.383641270500311  |
| 7          | 88                   | regulation of nuclear division                    |                    |
| GO:0051656 | 2.65134781667083e-07 | 19.0079787234043                                  | 0.440315549096948  |
| 7          | 101                  | establishment of organelle localization           |                    |
| GO:0051640 | 2.67051307331495e-07 | 14.5925736235595                                  | 0.653933983807349  |
| 8          | 150                  | organelle localization                            |                    |
| GO:0034453 | 3.93211835776371e-07 | 41.2586206896552                                  | 0.152584596221715  |
| 5          | 35                   | microtubule anchoring                             |                    |
| GO:0051329 | 6.32935923564417e-07 | 8.05915551839465                                  | 1.65227319908657   |
| 11         | 379                  | interphase of mitotic cell cycle                  |                    |
| GO:0008608 | 7.48018024905164e-07 | 74.9674054758801                                  | 0.0741125181648329 |
| 4          | 17                   | attachment of spindle microtubules to kinetochore |                    |
| GO:0051325 | 7.7772033780125e-07  | 7.88318330605565                                  | 1.68714967822296   |
| 11         | 387                  | interphase                                        |                    |
| GO:0031577 | 1.00651369015586e-06 | 33.4366262814539                                  | 0.183101515466058  |
| 5          | 42                   | spindle checkpoint                                |                    |
| GO:0007051 | 1.25766306931074e-06 | 20.3613086770982                                  | 0.348764791363919  |
| 6          | 80                   | spindle organization                              |                    |
| GO:0050000 | 1.85661134868087e-06 | 57.3120638085743                                  | 0.0915507577330289 |
| 4          | 21                   | chromosome localization                           |                    |
| GO:0051303 | 1.85661134868087e-06 | 57.3120638085743                                  | 0.0915507577330289 |
| 4          | 21                   | establishment of chromosome localization          |                    |
| GO:0071156 | 1.97760347735792e-06 | 9.23725490196078                                  | 1.15092381150093   |
| 9          | 264                  | regulation of cell cycle arrest                   |                    |
| GO:0000086 | 2.92583069556219e-06 | 13.0027372262774                                  | 0.627776624455055  |
| 7          | 144                  | G2/M transition of mitotic cell cycle             |                    |
| GO:0007050 | 3.99539455496947e-06 | 7.37320649603195                                  | 1.60867760016608   |
| 10         | 369                  | cell cycle arrest                                 |                    |
| GO:0051651 | 6.90324640129683e-06 | 14.8900468994268                                  | 0.466472908449242  |
| 6          | 107                  | maintenance of location in cell                   |                    |
| GO:0030261 | 8.25500485226602e-06 | 37.4498044328553                                  | 0.13078679676147   |
| 4          | 30                   | chromosome condensation                           |                    |
| GO:0000075 | 9.64188258652613e-06 | 8.7981351981352                                   | 1.05501349387586   |
| 242        |                      | cell cycle checkpoint                             | 8                  |
| GO:0071173 | 1.37882324114023e-05 | 32.4474576271186                                  | 0.148225036329666  |
| 4          | 34                   | spindle assembly checkpoint                       |                    |
| GO:0007096 | 1.68925712656398e-05 | 79.8833333333333                                  | 0.0523147187045879 |
| 3          | 12                   | regulation of exit from mitosis                   |                    |
| GO:0045786 | 1.75605492402451e-05 | 6.16897176439397                                  | 1.90512767282541   |
| 10         | 437                  | negative regulation of cell cycle                 |                    |
| GO:0033043 | 1.89948618539111e-05 | 6.10996804272644                                  | 1.92256591239361   |
| 10         | 441                  | regulation of organelle organization              |                    |

Tissue: Nerve\_Tibial=>Heart\_Left\_Ventricle Type: cluster

SourceGene: CCDC90B(ENSG00000137500.5)

|                |          |          |         |          |         |          |          |           |
|----------------|----------|----------|---------|----------|---------|----------|----------|-----------|
| TargetGeneSet: | RP11     | GPX6     | MTMR11  | PRELP    | ETNK2   | KIAA1383 | RPL31    | TSPO      |
| RPL37A         | SNED1    | RBMS3    | ZBTB47  | RPL10AP6 | BBX     | ITGB5    | ABTB1    | FGF12     |
| GMPSP1         | RPL34    | USP53    | MSNP1   | RPL37    | JMY     | CREBRF   | RPS18    | ADCYAP1R1 |
| YAE1D1         | SRI      | CTB      | ATP5J2  | GSTK1    | GS1     | GRIP1    | TMEM55A  | RPL30     |
| CYHR1          | C9orf156 |          | SLC44A1 | NTNG2    | ARRDC1  | RSU1     | PRTFDC1  | ZNF22     |
| RPL13AP5       |          | FXC1     | NR1H3   | ZBTB16   | DYRK4   | TMTC1    | FGD4     | RPL14P1   |
| GNPTAB         | ULK1     | STXBP6   | RPL36A  | NEK9     | JDP2    | POLR2M   | FAM81A   | SEC11A    |
| JMJD5          | SLC7A60S |          | MON1B   | FXR2     | PER1    | RPL26    | HS3ST3A1 | RPL23A    |
| RPL17          | PLEKHM1  | SLC38A10 |         | OSBPL1A  | TRAPPC8 | SBNO2    | MKNK2    | C19orf43  |
| UBA52          | SLC25A42 |          | CCDC9   | MYH7B    | ATP9A   | URB1     | BCL2L13  | PLA2G6    |
| RP3            | FAM127B  |          |         |          |         |          |          | EEF1B2P3  |

Stable4\_20PerPair

| GOBPID                                                      | Pvalue | OddsRatio            | ExpCount         | Count             | Size     | Term                                                                |          |        |         |
|-------------------------------------------------------------|--------|----------------------|------------------|-------------------|----------|---------------------------------------------------------------------|----------|--------|---------|
| GO:0072594                                                  | 14     | 2.58412319246211e-13 | 20.5102167182663 | 0.917583558231264 |          | establishment of protein localization to organelle                  |          |        |         |
| GO:0006614                                                  | 11     | 1.12668141048972e-12 | 30.9716312056738 | 0.472285654971974 |          | SRP-dependent cotranslational protein targeting to membrane         |          |        |         |
| GO:0006613                                                  | 106    | 1.25281388558025e-12 | 30.643469785575  | 0.476783613590755 | 11       | cotranslational protein targeting to membrane                       |          |        |         |
| GO:0045047                                                  | 106    | 1.25281388558025e-12 | 30.643469785575  | 0.476783613590755 | 11       | protein targeting to ER                                             |          |        |         |
| GO:0072599                                                  | 106    | 1.25281388558025e-12 | 30.643469785575  | 0.476783613590755 | 11       | establishment of protein localization to endoplasmic reticulum      |          |        |         |
| GO:0006612                                                  | 12     | 3.19068225975015e-12 | 22.8743476515456 | 0.688187668673448 |          | protein targeting to membrane                                       |          |        |         |
| GO:0070972                                                  | 11     | 4.13732373446474e-12 | 27.1839736933195 | 0.530759117016123 |          | protein localization to endoplasmic reticulum                       |          |        |         |
| GO:0006415                                                  | 10     | 7.95881032947131e-12 | 32.1099887766554 | 0.409314234309044 |          | translational termination                                           |          |        |         |
| GO:0006414                                                  | 10     | 3.40266175495566e-11 | 27.3511961722488 | 0.472285654971974 |          | translational elongation                                            |          |        |         |
| GO:0000184                                                  | 119    | 1.19525470078418e-10 | 23.814845704754  | 0.535257075634904 | 10       | nuclear-transcribed mRNA catabolic process, nonsense-mediated decay |          |        |         |
| GO:0019080                                                  | 10     | 1.25866887322011e-09 | 18.3687943262411 | 0.679191751435887 |          | viral genome expression                                             |          |        |         |
| GO:0019083                                                  | 10     | 1.25866887322011e-09 | 18.3687943262411 | 0.679191751435887 |          | viral transcription                                                 |          |        |         |
| GO:0006413                                                  | 10     | 1.34262074072221e-09 | 18.2381562099872 | 0.683689710054667 |          | translational initiation                                            |          |        |         |
| GO:0043624                                                  | 10     | 1.43151305453085e-09 | 18.1093452002543 | 0.688187668673448 |          | cellular protein complex disassembly                                |          |        |         |
| GO:0043241                                                  | 10     | 1.95929027695537e-09 | 17.4914004914005 | 0.710677461767352 |          | protein complex disassembly                                         |          |        |         |
| GO:0000956                                                  | 10     | 3.76806827694243e-09 | 16.2687249857061 | 0.76015500657394  |          | nuclear-transcribed mRNA catabolic process                          |          |        |         |
| GO:0034623                                                  | 10     | 4.99601276650178e-09 | 15.7671840354767 | 0.782644799667843 |          | cellular macromolecular complex disassembly                         |          |        |         |
| GO:0006402                                                  | 10     | 6.2214483141093e-09  | 15.3874458874459 | 0.800636634142966 |          | mRNA catabolic process                                              |          |        |         |
| GO:0032984                                                  | 10     | 6.56663903908814e-09 | 15.2953200645508 | 0.805134592761747 |          | macromolecular complex disassembly                                  |          |        |         |
| GO:0033365                                                  | 14     | 1.76727736295494e-08 | 8.32918962792088 | 2.12753442668327  |          | protein localization to organelle                                   |          |        |         |
| GO:0006605                                                  | 14     | 1.81492378685088e-08 | 8.31048593350384 | 2.13203238530206  |          | protein targeting                                                   |          |        |         |
| GO:0006401                                                  | 10     | 2.40589720690824e-08 | 13.2317016317016 | 0.922081516850045 |          | RNA catabolic process                                               |          |        |         |
| GO:0019058                                                  | 10     | 7.43844078156544e-08 | 11.6536404771699 | 1.03902844093834  |          | viral infectious cycle                                              |          |        |         |
| GO:0022415                                                  | 10     | 2.24268094993652e-07 | 10.2807272727273 | 1.16946924088298  |          | viral reproductive process                                          |          |        |         |
| GO:0071845                                                  | 284    | 5.06134324788978e-07 | 9.364299933643   | 1.27742024773372  | 10       | cellular component disassembly at cellular level                    |          |        |         |
| GO:0022411                                                  | 10     | 5.75315735175906e-07 | 9.22694571615435 | 1.29541208220884  |          | cellular component disassembly                                      |          |        |         |
| Tissue: Nerve_Tibial=>Heart_Left_Ventricle Type: asymmetric |        |                      |                  |                   |          |                                                                     |          |        |         |
| SourceGene: CNTD2 (ENSG00000105219.3)                       |        |                      |                  |                   |          |                                                                     |          |        |         |
| TargetGeneSet:                                              |        |                      |                  |                   |          |                                                                     |          |        |         |
| ANXA9                                                       | INSRR  | SRP9                 | UBC              | EIF3FP3           | RPL15    | HIGD1A                                                              | CHMP2B   | RPL24  | C3orf27 |
| C3orf37                                                     | RPL35A | ANAPC10              | RPS3A            | C5orf22           | BRIX1    | BTF3                                                                | SKP1     | SPOCK1 | TMEM14B |
| RPS10                                                       | RPL10A | RPL39P3              | MRPS12           | SNHG6             | RPL30    | EEF1D                                                               | KANK1    | DCTN3  | FAM22G  |
| POLR3A                                                      | RPS24  | RPL27A               | RPS13            | HTATIP2           | FAU      | RPS25                                                               | KDM5A    | PFDN5  | OR10P1  |
| SYCP3                                                       | RILPL1 | STARD13              | RNASEH2B         | RPS3AP6           | RPLP1    | ZZEF1                                                               | KIAA0100 |        |         |
| RPL19                                                       | EIF3G  | RPL18A               | RPS16            | EID2B             | EXOSC3P1 | RGN                                                                 | RPS23P8  | RPS4X  |         |
| RAB11FIP1P1                                                 |        | EMD                  |                  |                   |          |                                                                     |          |        |         |

| GOBPID                                     | Pvalue | OddsRatio                                                           | ExpCount         | Count             | Size | Term              |
|--------------------------------------------|--------|---------------------------------------------------------------------|------------------|-------------------|------|-------------------|
| GO:0006414                                 | 22     | 1.12426377239108e-34                                                | 130.857498961363 |                   |      | 0.370562590824164 |
|                                            | 105    | translational elongation                                            |                  |                   |      |                   |
| GO:0006614                                 | 21     | 1.40619194885409e-32                                                | 119.3            | 0.370562590824164 | 21   | 105               |
|                                            | 106    | SRP-dependent cotranslational protein targeting to membrane         |                  |                   |      |                   |
| GO:0006613                                 | 21     | 1.75010579333706e-32                                                | 117.888235294118 |                   |      | 0.374091758355823 |
|                                            | 106    | cotranslational protein targeting to membrane                       |                  |                   |      |                   |
| GO:0045047                                 | 21     | 1.75010579333706e-32                                                | 117.888235294118 |                   |      | 0.374091758355823 |
|                                            | 106    | protein targeting to ER                                             |                  |                   |      |                   |
| GO:0072599                                 | 21     | 1.75010579333706e-32                                                | 117.888235294118 |                   |      | 0.374091758355823 |
|                                            | 106    | establishment of protein localization to endoplasmic reticulum      |                  |                   |      |                   |
| GO:0006415                                 | 20     | 6.84356161348383e-32                                                | 130.204452521581 |                   |      | 0.321154245380943 |
|                                            | 91     | translational termination                                           |                  |                   |      |                   |
| GO:0070972                                 | 21     | 2.04497673012893e-31                                                | 103.217525773196 |                   |      | 0.416441768735728 |
|                                            | 118    | protein localization to endoplasmic reticulum                       |                  |                   |      |                   |
| GO:0000184                                 | 20     | 2.42741266830333e-29                                                | 93.1964809384164 |                   |      | 0.419970936267386 |
|                                            | 119    | nuclear-transcribed mRNA catabolic process, nonsense-mediated decay |                  |                   |      |                   |
| GO:0006413                                 | 21     | 6.07258898491126e-29                                                | 76.2465648854962 |                   |      | 0.536433464812124 |
|                                            | 152    | translational initiation                                            |                  |                   |      |                   |
| GO:0006612                                 | 21     | 7.02459986295605e-29                                                | 75.6636363636364 |                   |      | 0.539962632343782 |
|                                            | 153    | protein targeting to membrane                                       |                  |                   |      |                   |
| GO:0006401                                 | 205    | 7.5833112102058e-28                                                 | 58.936122102883  | 0.723479343990035 |      | 22                |
|                                            | 205    | RNA catabolic process                                               |                  |                   |      |                   |
| GO:0006402                                 | 178    | 1.97950146336038e-27                                                | 63.503821656051  | 0.62819182063525  |      | 21                |
|                                            | 178    | mRNA catabolic process                                              |                  |                   |      |                   |
| GO:0019080                                 | 20     | 3.87415982015813e-27                                                | 70.2733316917016 |                   |      | 0.532904297280465 |
|                                            | 151    | viral genome expression                                             |                  |                   |      |                   |
| GO:0019083                                 | 20     | 3.87415982015813e-27                                                | 70.2733316917016 |                   |      | 0.532904297280465 |
|                                            | 151    | viral transcription                                                 |                  |                   |      |                   |
| GO:0043624                                 | 20     | 5.11085612430377e-27                                                | 69.2068881882125 |                   |      | 0.539962632343782 |
|                                            | 153    | cellular protein complex disassembly                                |                  |                   |      |                   |
| GO:0043241                                 | 20     | 1.00453714998166e-26                                                | 66.6760168302945 |                   |      | 0.557608470002076 |
|                                            | 158    | protein complex disassembly                                         |                  |                   |      |                   |
| GO:0072594                                 | 21     | 3.87001346254351e-26                                                | 54.3819672131148 |                   |      | 0.719950176458377 |
|                                            | 204    | establishment of protein localization to organelle                  |                  |                   |      |                   |
| GO:0000956                                 | 20     | 4.10822896760333e-26                                                | 61.7059969690409 |                   |      | 0.596429312850322 |
|                                            | 169    | nuclear-transcribed mRNA catabolic process                          |                  |                   |      |                   |
| GO:0034623                                 | 20     | 7.54415845132792e-26                                                | 59.6816087138668 |                   |      | 0.614075150508615 |
|                                            | 174    | cellular macromolecular complex disassembly                         |                  |                   |      |                   |
| GO:0032984                                 | 20     | 1.35990178644407e-25                                                | 57.7845404747413 |                   |      | 0.631720988166909 |
|                                            | 179    | macromolecular complex disassembly                                  |                  |                   |      |                   |
| GO:0019058                                 | 20     | 2.58758551892479e-23                                                | 43.3848035468583 |                   |      | 0.815237699813162 |
|                                            | 231    | viral infectious cycle                                              |                  |                   |      |                   |
| GO:0022415                                 | 20     | 2.85800587275904e-22                                                | 38.0645161290323 |                   |      | 0.917583558231264 |
|                                            | 260    | viral reproductive process                                          |                  |                   |      |                   |
| GO:0071845                                 | 20     | 1.6961335005656e-21                                                 | 34.5454545454545 |                   |      | 1.00228357899107  |
|                                            | 284    | cellular component disassembly at cellular level                    |                  |                   |      |                   |
| GO:0022411                                 | 20     | 2.24675214330027e-21                                                | 34.0202214732788 |                   |      | 1.01640024911771  |
|                                            | 288    | cellular component disassembly                                      |                  |                   |      |                   |
| GO:0033365                                 | 23     | 3.47241803156095e-21                                                | 25.4642857142857 |                   |      | 1.66929624247457  |
|                                            | 473    | protein localization to organelle                                   |                  |                   |      |                   |
| GO:0006605                                 | 23     | 3.64251793132596e-21                                                | 25.4060025340513 |                   |      | 1.67282541000623  |
|                                            | 474    | protein targeting                                                   |                  |                   |      |                   |
| GO:0016032                                 | 21     | 7.30222353574565e-19                                                | 22.7418604651163 |                   |      | 1.59165455677808  |
|                                            | 451    | viral reproduction                                                  |                  |                   |      |                   |
| GO:0022613                                 | 7      | 1.30660656937396e-05                                                | 10.3496663886572 |                   |      | 0.794062694623209 |
|                                            | 225    | ribonucleoprotein complex biogenesis                                |                  |                   |      |                   |
| GO:0042254                                 | 6      | 1.33451810417935e-05                                                | 13.2932400932401 |                   |      | 0.525845962217148 |
|                                            | 149    | ribosome biogenesis                                                 |                  |                   |      |                   |
| GO:0071843                                 | 7      | 1.93101608071394e-05                                                | 9.71551724137931 |                   |      | 0.843471040066431 |
|                                            | 239    | cellular component biogenesis at cellular level                     |                  |                   |      |                   |
| Tissue: Nerve_Tibial=>Heart_Left_Ventricle |        |                                                                     |                  |                   |      | Type: asymmetric  |
| SourceGene:                                |        | ENS00000215346.3                                                    |                  |                   |      |                   |

Stable4\_20PerPair

| TargetGeneSet: | CCNL2                              | NPHP4     | SRRM1                | KHDRBS1          | PTGFR             | CNN3                                                   | RNPC3     | PIAS3             |              |
|----------------|------------------------------------|-----------|----------------------|------------------|-------------------|--------------------------------------------------------|-----------|-------------------|--------------|
| TIPRL          | RAB10                              | NRXN1     | AHSA2                | PPP3R1           | ANTXR1            | RABL2A                                                 | GALNT13   | NDUFB3            | STK36        |
| COX17          | ZXDC                               | RP11      | NPHP3                | TMEM14E          | MAP3K13           | METTL19                                                | C4orf3    | CPE               | NDUFS6       |
| EGFLAM         | COX7C                              | PPIC      | WDR55                | HMGXB3           | ATF6B             | NUDT3                                                  | TBCC      | EFHC1             | MARCKS       |
| TOMM7          | MRPS24                             | UBE2D4    | CCT6P1               | SGCE             | FAM71F2           | NDUFB2                                                 | RBM33     | GFRA2             | KIAA1875     |
| IL33           | C9orf123                           |           | CDK9                 | ANAPC2           | MLLT10            | RET                                                    | C10orf102 |                   | USMG5        |
| MRPL23         | TMEM138                            | COX8A     | VEGFB                | CCL13            | PCNXL3            | NDUFS8                                                 | C11orf67  |                   | KIAA1731     |
| MAML2          | VPS11                              | FEZ1      | COX14                | CAPS2            | GLTP              | ARL6IP4                                                | LTB4R     | RDH11             | SLIRP        |
| NDUFB1         | RAB8B                              | LUC7L     | TCEB2                | POLR3E           | CTD               | NDUFAB1                                                | SETD6     | SLC7A6            | YWHAE        |
| MYBBP1A        | VM01                               | KIAA0753  |                      | NXP3             | SUMO2             | C17orf89                                               |           | CTDP1             | CFD          |
| UQCR11         | C19orf70                           |           | CAPS                 | C3               | C19orf79          |                                                        | TRAPPC5   | ADAMTS10          |              |
| GPATCH1        | USF2                               | COX6B1    | POLR2I               | COX7A1           | QPCTL             | LENG8                                                  | XRN2      | ROMO1             | ZMYND8       |
| RPS21          | SLC2A4RG                           |           | PCP4                 | NDUFV3           | CHCHD10           | DDX17                                                  | RP1       | TOMM22            | TUBGCP6      |
| PRPS2          | NDUFA1                             |           |                      |                  |                   |                                                        |           |                   |              |
| GOBPID         | Pvalue                             | OddsRatio | ExpCount             | Count            | Size              | Term                                                   |           |                   |              |
| GO:0022904     | 12                                 | 96        | 2.67348502771974e-12 | 22.8988764044944 |                   | respiratory electron transport chain                   |           | 0.67095702719535  |              |
| GO:0006120     | 12                                 | 134       | 1.10616062802446e-10 | 44               | 0.251608885198256 | mitochondrial electron transport, NADH to ubiquinone   | 8         |                   | 36           |
| GO:0022900     | 12                                 | 134       | 1.450782056823e-10   | 15.7244428071468 |                   | electron transport chain                               |           | 0.936544183793509 |              |
| GO:0006119     | 9                                  | 58        | 2.22073209059671e-10 | 28.5512422360248 |                   | oxidative phosphorylation                              |           | 0.40536987059719  |              |
| GO:0045333     | 12                                 | 142       | 2.86203743916216e-10 | 14.7484874675886 |                   | cellular respiration                                   |           | 0.992457269393122 |              |
| GO:0042773     | 8                                  | 47        | 1.07918168525966e-09 | 31.5654811138682 |                   | ATP synthesis coupled electron transport               |           | 0.328489377897723 |              |
| GO:0042775     | 8                                  | 47        | 1.07918168525966e-09 | 31.5654811138682 |                   | mitochondrial ATP synthesis coupled electron transport |           | 0.328489377897723 |              |
| GO:0006091     | 16                                 | 428       | 4.22139006051641e-08 | 6.36801827527127 |                   | generation of precursor metabolites and energy         |           | 2.99135007957927  |              |
| GO:0015980     | 13                                 | 307       | 2.12874277364463e-07 | 7.06277056277056 |                   | energy derivation by oxidation of organic compounds    |           | 2.14566465988513  |              |
| Tissue:        | Nerve_Tibial=>Heart_Left_Ventricle |           | Type:                |                  | asymmetric        |                                                        |           |                   |              |
| SourceGene:    | ENSG00000223442.1                  |           |                      |                  |                   |                                                        |           |                   |              |
| TargetGeneSet: | ISG15                              | AGRN      | MXRA8                | ZBTB48           | MT1XP1            | MFAP2                                                  | ATPIF1    | RP11              |              |
| FAM176B        | FTH1P1                             | CYP4B1    | SPATA6               | ALG6             | HHLA3             | IFI44L                                                 | IFI44     | TGFBR3            | AMIGO1       |
| AMPD2          | INTS3                              | CRABP2    | KIRREL               | GLUL             | CNST              | TRAPPC12-AS1                                           |           | C2orf18           | EMILIN1 XPO1 |
| ATOX8          | IL1B                               | INHBB     | METAP1D              | ITGAV            | COL3A1            | FN1                                                    | TMBIM1    | SERPINE2          |              |
| MTMR14         | TIMP4                              | GALNTL2   | TRANK1               | ABHD6            | SLC9C1            | CCDC80                                                 | KLF15     | GOLIM4            | PHF17        |
| ZDHHC11        | CDH6                               | NREP      | CDX1                 | SPARC            | PDLIM7            | RMND5B                                                 | SCAND3    | RXR8              | FKBP5        |
| MAPK14         | BYSL                               | CCND3     | MT01                 | COL12A1          | SH3BGRL2          |                                                        | PGM3      | KIAA1009          |              |
| SESN1          | FAN1                               | SEPT7     | HGF                  | SAMD9L           | COL1A2            | MKLN1                                                  | ADCK2     | LOXL2             | DRP2         |
| PROSC          | MSC                                | CRISPLD1  |                      | CTHRC1           | SYBU              | SNTB1                                                  | OGN       | ASP2              | ANKS6        |
| COL15A1        | ZFP37                              | IER5L     | COL5A1               | LCN6             | ECHDC3            | ZNF438                                                 | ITGB1     | ARHGAP22          |              |
| MICU1          | IFIT1                              | PANK1     | POLL                 | LSP1             | PRKCDBP           | DCHS1                                                  | ZNF214    | FJX1              | PRR5L        |
| NR1H3          | LRRC55                             | SLC43A1   | TMEM223              | NRXN2            | DPF2              | KAT5                                                   | OAF       | MGST1             | LIMA1        |
| TENC1          | PAN2                               | IRAK3     | LRRC10               | LUM              | BRAP              | LPAR6                                                  | LINC00346 |                   | ARHGEF40     |
| PRMT5-AS1      |                                    | ZFHX2     | C14orf101            |                  | ARID4A            | DACT1                                                  | MTA1      | NIPA2             | GPR176 CILP  |
| LOXL1          | FAM174B                            | CCDC101   | MT1A                 | FOXC2            | DEF8              | SERPINF2                                               | RP1       |                   | ZMYND15      |
| ZNF594         | CCR10                              | EZH1      | ARL17B               | COL1A1           | TMEM100           | MRC2                                                   | CDC42EP4  |                   | BAIAP2       |
| ABHD3          | C19orf6                            | TCF3      | CSNK1G2              | MOB3A            | PLIN4             | XAB2                                                   | ZNF844    | ZNF564            | ARRDC2       |
| ISYNA1         | ZNF233                             | HIF3A     | RCN3                 | VRK3             | CLEC11A           | SSC5D                                                  | ZNF274    | C20orf202         |              |
| CSRP2BP        | BCL2L1                             | TTI1      | KIAA1755             |                  | SLC04A1           | ADAMTS5                                                | FAM176C   | RUNX1             | CBS          |
| SCARF2         | DRG1                               | C1QTNF6   | NOL12                | TRIOBP           | GTPBP1            | MXRA5                                                  | RP3       | TSC22D3           | KIAA1210     |
| SEPT6          | NLGN4Y                             |           |                      |                  |                   |                                                        |           |                   |              |
| GOBPID         | Pvalue                             | OddsRatio | ExpCount             | Count            | Size              | Term                                                   |           |                   |              |
| GO:0030199     | 9                                  | 33        | 2.52257794560002e-11 | 39.3805147058824 |                   | collagen fibril organization                           |           | 0.331118953705626 |              |
| GO:0030198     | 11                                 | 161       | 6.52673092890722e-07 | 7.74706467661692 |                   | extracellular matrix organization                      |           | 1.61545913777593  |              |
| GO:0043062     | 11                                 | 162       | 6.94264786395083e-07 | 7.69521597311456 |                   | extracellular structure organization                   |           | 1.62549304546398  |              |

Stable4\_20PerPair

Tissue: Heart\_Left\_Ventricle=>Nerve\_Tibial Type: asymmetric  
SourceGene: ENSG00000228404.1  
TargetGeneSet: C1QA C1QC C1QB RPS6KA1 LAPTM5 BRD8 CD53 Clorf162  
ADORA3 DENND4B ARHGAP30 FCER1G NPL CHIT1 FAM177B ENAH CCDC75  
RAB11FIP5 VAMP8 ARID5A BUB1 SLC11A1 IRS1 ATRIP STAB1 LRIG1  
GAP43 HCLS1 TM4SF1 TLR6 RBM47 CXCL13 TLR2 SAP30 KCNN2 P4HA2-AS1  
ERGIC1 ATP6V0E1 MUTED GPSM3 CYB5R4 RP3 C6orf123 TWISTNB  
IKZF1 MTERF GAL3ST4 TFEC TES IRF5 TBXAS1 RP11 PREX2 SLA  
CDKN2A CDKN2B-AS1 GNA14 SYK FGD3 ARRDC1 ITIH5 ASCC1 SAA2-SAA4  
SAA1 MS4A6A MS4A7 SLC15A3 FERMT3 PGM2L1 SLC02B1 MYO7A GPR162 PTPN6  
CD163 C3AR1 ERP27 IRAK4 BIN2 MSRB3 HSPB8 ALOX5AP RNASE6 RNASE2  
SLC7A7 FMN1 ANP32A APOBR CORO1A RPH3AL CD68 ALOX15B PIK3R5 EVI2A  
FMNL1 YES1 ABHD3 STXBP2 CD97 RASAL3 ZNF738 RASGRP4 SHKBP1 SIGLEC9  
SIGLEC7 NLRP12 SIRPG NNAT PKIG ATP9A SLC17A9 SAMSN1 TLR8 WAS  
WDR44 SASH3 MTM1 ARHGAP4

| GOBPID     | Pvalue                                 | OddsRatio                                                                                                                 | ExpCount         | Count            | Size | Term               |
|------------|----------------------------------------|---------------------------------------------------------------------------------------------------------------------------|------------------|------------------|------|--------------------|
| GO:0002250 | 1.14803998294445e-08                   |                                                                                                                           | 10.3848973607038 |                  |      | 1.37014739464397   |
| 12         | 198                                    | adaptive immune response                                                                                                  |                  |                  |      |                    |
| GO:0050778 | 2.00383920420658e-07                   |                                                                                                                           | 6.51209302325581 |                  |      | 2.5188568265172 14 |
| 364        | positive regulation of immune response |                                                                                                                           |                  |                  |      |                    |
| GO:0002460 | 4.84306528829036e-07                   |                                                                                                                           | 9.21377517868746 |                  |      | 1.25250847692201   |
| 10         | 181                                    | adaptive immune response based on somatic recombination of immune receptors built from immunoglobulin superfamily domains |                  |                  |      |                    |
| GO:0006954 | 6.21981120977108e-07                   |                                                                                                                           | 5.48914330833004 |                  |      | 3.1970105875026 15 |
| 462        | inflammatory response                  |                                                                                                                           |                  |                  |      |                    |
| GO:0050900 | 8.47628373614584e-07                   |                                                                                                                           | 7.58822667318026 |                  |      | 1.66770465711715   |
| 11         | 241                                    | leukocyte migration                                                                                                       |                  |                  |      |                    |
| GO:0050865 | 4.25529148021367e-06                   |                                                                                                                           | 5.77588574567427 |                  |      | 2.3735381634489 12 |
| 343        | regulation of cell activation          |                                                                                                                           |                  |                  |      |                    |
| GO:0002253 | 6.83481194313715e-06                   |                                                                                                                           | 6.0351513732834  | 2.06906096463913 |      | 11                 |
| 299        | activation of immune response          |                                                                                                                           |                  |                  |      |                    |
| GO:0002694 | 1.33374702695963e-05                   |                                                                                                                           | 5.59807901413556 |                  |      | 2.22129956404401   |
| 11         | 321                                    | regulation of leukocyte activation                                                                                        |                  |                  |      |                    |
| GO:0002443 | 1.53366305529808e-05                   |                                                                                                                           | 6.92748340768143 |                  |      | 1.46010656701958   |
| 9          | 211                                    | leukocyte mediated immunity                                                                                               |                  |                  |      |                    |

Tissue: Heart\_Left\_Ventricle=>Nerve\_Tibial Type: cluster  
SourceGene: ENSG00000232821.1  
TargetGeneSet: HSPB7 PTGER3 PXDN RETSAT MOGAT1 CIDEC TIMP4 PPARG  
ADIPOQ ADIPOQ-AS1 HSP90AB2P KLB RP11 ACSL1 PPARGC1B  
KLHL31 SLC29A4 MLXIPL CD36 LEP PRRT4 DUSP4 FABP4 AQP9 AGPAT2  
O3FAR1 SCD KCNIP2 GPAM PNPLA2 LGALS12 DGAT2 THRSP GPD1 PPP1R1A  
PLIN1 ABCC6 SPIRE2 TUSC5 SCN4A FASN PLIN4 PLIN5 OLFM2 RFXANK  
CEBPA LIPE RPL12L3 BLCAP PCK1 RP1 GYG2 TMEM164

| GOBPID     | Pvalue                          | OddsRatio                               | ExpCount         | Count             | Size | Term              |
|------------|---------------------------------|-----------------------------------------|------------------|-------------------|------|-------------------|
| GO:0006641 | 2.38359895737063e-18            |                                         | 66.367201426025  | 0.311950730053283 |      | 13                |
| 98         | triglyceride metabolic process  |                                         |                  |                   |      |                   |
| GO:0006639 | 4.69741644196249e-18            |                                         | 62.6582491582492 |                   |      | 0.327866583627431 |
| 13         | 103                             | acylglycerol metabolic process          |                  |                   |      |                   |
| GO:0006638 | 5.3570268371576e-18             |                                         | 61.965367965368  | 0.33104975434226  |      | 13                |
| 104        | neutral lipid metabolic process |                                         |                  |                   |      |                   |
| GO:0019432 | 5.83776216399773e-14            |                                         | 79.3912776412776 |                   |      | 0.168708047885959 |
| 9          | 53                              | triglyceride biosynthetic process       |                  |                   |      |                   |
| GO:0046460 | 8.33727060110283e-14            |                                         | 75.9289071680376 |                   |      | 0.175074389315618 |
| 9          | 55                              | neutral lipid biosynthetic process      |                  |                   |      |                   |
| GO:0046463 | 8.33727060110283e-14            |                                         | 75.9289071680376 |                   |      | 0.175074389315618 |
| 9          | 55                              | acylglycerol biosynthetic process       |                  |                   |      |                   |
| GO:0046486 | 8.76471418799091e-13            |                                         | 22.6739344666174 |                   |      | 0.824441215140821 |
| 13         | 259                             | glycerolipid metabolic process          |                  |                   |      |                   |
| GO:0045017 | 1.23681112604198e-09            |                                         | 23.5929398786542 |                   |      | 0.49657463151339  |
| 9          | 156                             | glycerolipid biosynthetic process       |                  |                   |      |                   |
| GO:0044262 | 1.47954503401583e-07            |                                         | 16.1820768136558 |                   |      | 0.614351947962079 |
| 8          | 193                             | cellular carbohydrate metabolic process |                  |                   |      |                   |
| GO:0019216 | 1.5395511703538e-07             |                                         | 16.0939445387663 |                   |      | 0.617535118676908 |



STable4\_20PerPair

|            |     |                                                |                  |                    |  |                    |   |    |
|------------|-----|------------------------------------------------|------------------|--------------------|--|--------------------|---|----|
| 8          | 194 | regulation of lipid metabolic process          |                  |                    |  |                    |   |    |
| GO:0006071 |     | 6.30229179542734e-07                           | 76.1216931216931 |                    |  | 0.0700297557262473 |   |    |
| 4          | 22  | glycerol metabolic process                     |                  |                    |  |                    |   |    |
| GO:0019433 |     | 7.61135957108558e-07                           | 72.1102756892231 |                    |  | 0.0732129264410767 |   |    |
| 4          | 23  | triglyceride catabolic process                 |                  |                    |  |                    |   |    |
| GO:0019400 |     | 9.11240520275404e-07                           | 68.5             | 0.0763960971559062 |  |                    | 4 | 24 |
|            |     | alditol metabolic process                      |                  |                    |  |                    |   |    |
| GO:0046461 |     | 9.11240520275404e-07                           | 68.5             | 0.0763960971559062 |  |                    | 4 | 24 |
|            |     | neutral lipid catabolic process                |                  |                    |  |                    |   |    |
| GO:0046464 |     | 9.11240520275404e-07                           | 68.5             | 0.0763960971559062 |  |                    | 4 | 24 |
|            |     | acylglycerol catabolic process                 |                  |                    |  |                    |   |    |
| GO:0050873 |     | 9.11240520275404e-07                           | 68.5             | 0.0763960971559062 |  |                    | 4 | 24 |
|            |     | brown fat cell differentiation                 |                  |                    |  |                    |   |    |
| GO:0055089 |     | 2.50194174192626e-06                           | 167.43023255814  | 0.0286485364334648 |  |                    |   | 3  |
| 9          |     | fatty acid homeostasis                         |                  |                    |  |                    |   |    |
| GO:0046503 |     | 3.02691826860864e-06                           | 48.9013605442177 |                    |  | 0.101861462874542  |   |    |
| 4          | 32  | glycerolipid catabolic process                 |                  |                    |  |                    |   |    |
| GO:0006631 |     | 3.05314827031352e-06                           | 10.6203007518797 |                    |  | 0.916753165870874  |   |    |
| 8          | 288 | fatty acid metabolic process                   |                  |                    |  |                    |   |    |
| GO:0019751 |     | 3.88556489186654e-06                           | 45.6349206349206 |                    |  | 0.1082278043042    | 4 |    |
| 34         |     | polyol metabolic process                       |                  |                    |  |                    |   |    |
| GO:0032787 |     | 3.95504925652452e-06                           | 8.69532542746829 |                    |  | 1.2764514566466    | 9 |    |
| 401        |     | monocarboxylic acid metabolic process          |                  |                    |  |                    |   |    |
| GO:0044242 |     | 4.46166843388477e-06                           | 16.3442748091603 |                    |  | 0.436094387931631  |   |    |
| 6          | 137 | cellular lipid catabolic process               |                  |                    |  |                    |   |    |
| GO:0010876 |     | 4.78571076242548e-06                           | 12.2508629191321 |                    |  | 0.684381703688326  |   |    |
| 7          | 215 | lipid localization                             |                  |                    |  |                    |   |    |
| GO:0046339 |     | 4.89262644019665e-06                           | 125.55523255814  | 0.0350148778631237 |  |                    |   | 3  |
| 11         |     | diacylglycerol metabolic process               |                  |                    |  |                    |   |    |
| GO:0050872 |     | 4.89262644019665e-06                           | 125.55523255814  | 0.0350148778631237 |  |                    |   | 3  |
| 11         |     | white fat cell differentiation                 |                  |                    |  |                    |   |    |
| GO:0055088 |     | 5.59022469380387e-06                           | 22.9926187419769 |                    |  | 0.257836827901183  |   |    |
| 5          | 81  | lipid homeostasis                              |                  |                    |  |                    |   |    |
| GO:0006637 |     | 7.55092524771267e-06                           | 38.0132275132275 |                    |  | 0.127326828593177  |   |    |
| 4          | 40  | acyl-CoA metabolic process                     |                  |                    |  |                    |   |    |
| GO:0035383 |     | 7.55092524771267e-06                           | 38.0132275132275 |                    |  | 0.127326828593177  |   |    |
| 4          | 40  | thioester metabolic process                    |                  |                    |  |                    |   |    |
| GO:0045834 |     | 1.04540248717122e-05                           | 20.0700869077656 |                    |  | 0.292851705764307  |   |    |
| 5          | 92  | positive regulation of lipid metabolic process |                  |                    |  |                    |   |    |
| GO:0010035 |     | 1.53444045941357e-05                           | 8.42944969260759 |                    |  | 1.14275828662376   |   |    |
| 8          | 359 | response to inorganic substance                |                  |                    |  |                    |   |    |
| GO:0034383 |     | 1.64209495918165e-05                           | 77.2379248658318 |                    |  | 0.0509307314372708 |   |    |
| 3          | 16  | low-density lipoprotein particle clearance     |                  |                    |  |                    |   |    |
| GO:0071285 |     | 1.64209495918165e-05                           | 77.2379248658318 |                    |  | 0.0509307314372708 |   |    |
| 3          | 16  | cellular response to lithium ion               |                  |                    |  |                    |   |    |
| GO:0019915 |     | 1.71434037712978e-05                           | 30.3915343915344 |                    |  | 0.155975365026642  |   |    |
| 4          | 49  | lipid storage                                  |                  |                    |  |                    |   |    |

Tissue: Nerve\_Tibial=>Heart\_Left\_Ventricle

Type: asymmetric

SourceGene: ENSG00000239935.1

|                |        |          |          |         |         |          |          |          |          |
|----------------|--------|----------|----------|---------|---------|----------|----------|----------|----------|
| TargetGeneSet: | DFFB   | RBP7     | UBE4B    | HNRNPR  | RP1     | KHDRBS1  | NDUFS5   | TAL1     | NRD1     |
| RP4            | FAM69A | WNT2B    | BCAS2    | ITGA10  | C1orf54 | SPRR1A   | S100A4   | INTS3    | RP11     |
| CRTC2          | RGS5   | TIPRL    | CEP350   | MIR4426 | HHAT    | LYST     | SOS1     | KDM3A    | COX5B    |
| RABL2A         | INHBB  | MAP3K2   | SLC40A1  | STK36   | STK11IP | ASB1     | ING5     | MRPS36P1 |          |
| MTMR14         | CCDC72 | SNORD19B |          | PDHB    | ROB1    | CD200R1  | CCDC58   | ITGB5    | ABTB1    |
| UBQLN4P1       |        | RTP4     | BCL6     | ATP5I   | METTL19 | QDPR     | FAM184B  | WDR19    | RPL7AP31 |
| FAM13A-AS1     |        | TMSB4XP8 |          | ENPEP   | PDE5A   | LSM6     | CTSO     | PTGER4   | C5orf43  |
| PIK3R1         | COX7C  | CTD      | KIF3A    | SOX4    | ANKS1A  | FKBP5    | ETV7     | PEX6     | PPP2R5D  |
| MARCKS         | GTF2H5 | AGPAT4   | FAM120B  | IQCE    | AGR2    | DNAH11   | CDK14    | SGCE     | ECD      |
| ATP5J2         | GFRA2  | BIN3     | EBF2     | UBE2V2  | ENY2    | DENND3   | IL33     | GLIPR2   | ZNF169   |
| COL15A1        | GRIN3A | C9orf114 |          | USP20   | CAMSAP1 | RET      | CXCL12   | ZNF22    | RHOBTB1  |
| CALM2P2        | BLNK   | TM9SF3   | C10orf82 |         | POLR2L  | LSP1     | PHLDA2   | OLFML1   | ATG13    |
| LRRN4CL        | COX8A  | FAU      | SYVN1    | PRCP    | FEZ1    | TSPAN11  | C12orf35 | PKP2     | TWF1     |
| TENC1          | ITGA5  | NDUFA12  | RPS11P5  | RPS7P10 | MED4    | MED4-AS1 | MRPL52   | AP1G2    |          |

Stable4\_20PerPair

| GO:ID                                                       | Pvalue  | OddsRatio | ExpCount             | Count    | Size           | Term                                                   |          |          |        |      |
|-------------------------------------------------------------|---------|-----------|----------------------|----------|----------------|--------------------------------------------------------|----------|----------|--------|------|
| GO:0022904                                                  | 13      | 96        | 2.38067494063953e-11 | 15       | 9031841652324  | respiratory electron transport chain                   |          |          |        |      |
| GO:0045333                                                  | 14      | 142       | 3.05580499993376e-10 | 11       | 1499550359712  | cellular respiration                                   |          |          |        |      |
| GO:0022900                                                  | 134     | 134       | 1.65293176557921e-09 | 10       | 8796340023613  | electron transport chain                               |          |          |        |      |
| GO:0015980                                                  | 17      | 307       | 2.67741731030971e-08 | 6        | 03793103448276 | energy derivation by oxidation of organic compounds    |          |          |        |      |
| GO:0006091                                                  | 19      | 428       | 1.31625266919999e-07 | 4        | 81500200707952 | generation of precursor metabolites and energy         |          |          |        |      |
| Tissue: Nerve_Tibial=>Heart_Left_Ventricle Type: asymmetric |         |           |                      |          |                |                                                        |          |          |        |      |
| SourceGene: ENSG00000243172.1                               |         |           |                      |          |                |                                                        |          |          |        |      |
| TargetGeneSet:                                              |         |           |                      |          |                |                                                        |          |          |        |      |
| SPRR1A                                                      | S100A4  | MIR4426   | HHAT                 | SOS1     | KDM3A          | SH3RF3                                                 | RABL2A   | INHBB    | NDUFB3 | ING5 |
| MTMR14                                                      | PDHB    | ROBO1     | CCDC58               | UBQLN4P1 | RP11           | BCL6                                                   | ATP5I    | METTTL19 | QDPR   |      |
| FAM184B                                                     | COX7C   | CTD       | ADAMTS19             | RP3      | ETV7           | USP49                                                  | PPP2R5D  | MARCKS   | IQCE   |      |
| AGR2                                                        | DNAH11  | GFRA2     | EBF2                 | GLIPR2   | COL15A1        | C9orf114                                               | USP20    | CAMSAP1  | RET    |      |
| CXCL12                                                      | CALM2P2 | BLNK      | PHLDA2               | ATG13    | OR4C3          | COX8A                                                  | SYVN1    | UCP2     | PRCP   |      |
| TSPAN11                                                     | PKP2    | ITGA5     | RIC8B                | RPS11P5  | RPS7P10        | MRPL52                                                 | ARF6     | U3       | MAX    |      |
| SLIRP                                                       | NDUFB1  | FBN1      | SCAND2               | IFT140   | POLR3E         | MT1JP                                                  | PSMB10   | DHX38    | ZC3H18 |      |
| INPP5K                                                      | MNT     | SPAG7     | LRRC48               | EZH1     | MTMR4          | SLC16A6                                                | SMCHD1   | ZNF397   | DPP9   |      |
| SNRPEP4                                                     | CAPS    | C19orf60  | GPATCH1              | COX6B1   | NDUFA3         | ZNF274                                                 | ROMO1    | BCAS4    |        |      |
| RPS21                                                       | ATP5J   | CHCHD10   | PLA2G6               | TOMM22   | MAGEH1         | HDAC8                                                  | RP13     | PGRMC1   | NDUFA1 |      |
| PNMA6C                                                      |         |           |                      |          |                |                                                        |          |          |        |      |
| GO:ID                                                       | Pvalue  | OddsRatio | ExpCount             | Count    | Size           | Term                                                   |          |          |        |      |
| GO:0022904                                                  | 11      | 96        | 6.72920021658114e-12 | 25       | 6720588235294  | respiratory electron transport chain                   |          |          |        |      |
| GO:0045333                                                  | 12      | 142       | 2.70262888587389e-11 | 18       | 5109425785482  | cellular respiration                                   |          |          |        |      |
| GO:0022900                                                  | 11      | 134       | 2.63392577042806e-10 | 17       | 6936540198735  | electron transport chain                               |          |          |        |      |
| GO:0015980                                                  | 15      | 428       | 2.01036838139178e-09 | 9        | 7467477865163  | energy derivation by oxidation of organic compounds    |          |          |        |      |
| GO:0006091                                                  | 6       | 58        | 1.7873964604507e-08  | 7        | 45353226036177 | generation of precursor metabolites and energy         |          |          |        |      |
| GO:0006119                                                  | 5       | 36        | 9.53058109375238e-07 | 21       | 4525474525475  | oxidative phosphorylation                              |          |          |        |      |
| GO:0006120                                                  | 5       | 36        | 1.81379446212975e-06 | 29       | 6464019851117  | mitochondrial electron transport, NADH to ubiquinone   |          |          |        |      |
| GO:0042773                                                  | 5       | 47        | 7.02387280262989e-06 | 21       | 8650793650794  | ATP synthesis coupled electron transport               |          |          |        |      |
| GO:0042775                                                  | 5       | 47        | 7.02387280262989e-06 | 21       | 8650793650794  | mitochondrial ATP synthesis coupled electron transport |          |          |        |      |
| Tissue: Heart_Left_Ventricle=>Nerve_Tibial Type: asymmetric |         |           |                      |          |                |                                                        |          |          |        |      |
| SourceGene: ENSG00000258953.2                               |         |           |                      |          |                |                                                        |          |          |        |      |
| TargetGeneSet:                                              |         |           |                      |          |                |                                                        |          |          |        |      |
| TRMT1L                                                      | TLR5    | VAMP8     | SLC4A3               | CCR2     | HCLS1          | KLHL7                                                  | PDE6B    | SLC2A9   | IRB47  | AR5J |
| RP13                                                        | SLC1A3  | GNPDA1    | LCP2                 | HFA-DRB5 | FGD2           | ZC3H12D                                                | TFEC     | RFM5     |        |      |
| TBXAS1                                                      | SLA     | SYK       | ENG                  | SFMBT2   | ASCC1          | VENTX                                                  | MS4A6A   | MS4A4E   | MS4A7  |      |
| CCDC88B                                                     | SLC02B1 | LRRC32    | SLC37A2              | C11orf45 | PTPN6          | CD163                                                  | C3AR1    | IRAK4    |        |      |
| RNASE6                                                      | SLC7A7  | FMN1      | PMFBP1               | BCAR1    | HIC1           | ZFP3                                                   | ALOX15B  | PIK3R5   | AKAP10 |      |
| STXBP2                                                      | ZNF812  | NUDT19    | NR1H2                | SIGLEC9  | SIGLEC7        | CD33                                                   | SIGLEC10 | CTD      |        |      |
| LILRB2                                                      | HCK     | TLR8      | WAS                  | BTK      | SASH3          | ARHGAP4                                                |          |          |        |      |
| GO:ID                                                       | Pvalue  | OddsRatio | ExpCount             | Count    | Size           | Term                                                   |          |          |        |      |
| GO:0050778                                                  |         |           | 2.48504833504871e-11 | 12       | 8391147960739  |                                                        |          |          |        |      |

Stable4\_20PerPair

|                                            |         |                                                                                                                           |                  |                   |         |                    |          |         |         |
|--------------------------------------------|---------|---------------------------------------------------------------------------------------------------------------------------|------------------|-------------------|---------|--------------------|----------|---------|---------|
| 15                                         | 364     | positive regulation of immune response                                                                                    |                  |                   |         |                    |          |         |         |
| GO:0002764                                 |         | 5.05636428672103e-10                                                                                                      | 14.3928813559322 |                   |         | 1.06400941111342   |          |         |         |
| 12                                         | 248     | immune response-regulating signaling pathway                                                                              |                  |                   |         |                    |          |         |         |
| GO:0002757                                 |         | 4.07884376650866e-09                                                                                                      | 13.6392682072829 |                   |         | 1.00823472424054   |          |         |         |
| 11                                         | 235     | immune response-activating signal transduction                                                                            |                  |                   |         |                    |          |         |         |
| GO:0002253                                 |         | 4.23671184581676e-09                                                                                                      | 11.7926132404181 |                   |         | 1.28281779807626   |          |         |         |
| 12                                         | 299     | activation of immune response                                                                                             |                  |                   |         |                    |          |         |         |
| GO:0001816                                 |         | 9.6346617077943e-09                                                                                                       | 9.72812266267764 |                   |         | 1.69469240882984   |          |         |         |
| 13                                         | 395     | cytokine production                                                                                                       |                  |                   |         |                    |          |         |         |
| GO:0002250                                 |         | 1.53746943109868e-07                                                                                                      | 12.7583108715184 |                   |         | 0.849491384679261  |          |         |         |
| 9                                          | 198     | adaptive immune response                                                                                                  |                  |                   |         |                    |          |         |         |
| GO:0002768                                 |         | 1.71706727782569e-07                                                                                                      | 15.5261437908497 |                   |         | 0.617811916130372  |          |         |         |
| 8                                          | 144     | immune response-regulating cell surface receptor signaling pathway                                                        |                  |                   |         |                    |          |         |         |
| GO:0050865                                 |         | 1.9773336970043e-07                                                                                                       | 9.1322348216395  | 1.47159366133832  |         |                    |          | 11      |         |
| 343                                        |         | regulation of cell activation                                                                                             |                  |                   |         |                    |          |         |         |
| GO:0002443                                 |         | 2.63990345932064e-07                                                                                                      | 11.9263030076593 |                   |         | 0.905266071552142  |          |         |         |
| 9                                          | 211     | leukocyte mediated immunity                                                                                               |                  |                   |         |                    |          |         |         |
| GO:0001817                                 |         | 3.12044145533633e-07                                                                                                      | 8.70244534595447 |                   |         | 1.54023942979725   |          |         |         |
| 11                                         | 359     | regulation of cytokine production                                                                                         |                  |                   |         |                    |          |         |         |
| GO:0043299                                 |         | 5.55191241907973e-07                                                                                                      | 38.160552897395  | 0.163033700089959 |         |                    |          | 5       |         |
| 38                                         |         | leukocyte degranulation                                                                                                   |                  |                   |         |                    |          |         |         |
| GO:0050867                                 |         | 7.80228360848356e-07                                                                                                      | 10.407743200196  | 1.02968652688395  |         |                    |          | 9       |         |
| 240                                        |         | positive regulation of cell activation                                                                                    |                  |                   |         |                    |          |         |         |
| GO:0002694                                 |         | 9.82156060142484e-07                                                                                                      | 8.7051694286421  | 1.37720572970729  |         |                    |          | 10      |         |
| 321                                        |         | regulation of leukocyte activation                                                                                        |                  |                   |         |                    |          |         |         |
| GO:0002460                                 |         | 9.85128122379462e-07                                                                                                      | 12.1738385784629 |                   |         | 0.776555255691648  |          |         |         |
| 8                                          | 181     | adaptive immune response based on somatic recombination of immune receptors built from immunoglobulin superfamily domains |                  |                   |         |                    |          |         |         |
| GO:0045055                                 |         | 1.17774441339446e-06                                                                                                      | 32.2762033288349 |                   |         | 0.188775863262058  |          |         |         |
| 5                                          | 44      | regulated secretory pathway                                                                                               |                  |                   |         |                    |          |         |         |
| GO:0002429                                 |         | 1.54053548353115e-06                                                                                                      | 14.4070707070707 |                   |         | 0.570617950314857  |          |         |         |
| 7                                          | 133     | immune response-activating cell surface receptor signaling pathway                                                        |                  |                   |         |                    |          |         |         |
| GO:0043300                                 |         | 1.74037131440556e-06                                                                                                      | 58.3042596348884 |                   |         | 0.0900975711023459 |          |         |         |
| 4                                          | 21      | regulation of leukocyte degranulation                                                                                     |                  |                   |         |                    |          |         |         |
| GO:0002886                                 |         | 2.55844426015257e-06                                                                                                      | 52.1597096188748 |                   |         | 0.0986782921597121 |          |         |         |
| 4                                          | 23      | regulation of myeloid leukocyte mediated immunity                                                                         |                  |                   |         |                    |          |         |         |
| GO:0002703                                 |         | 2.60592313300984e-06                                                                                                      | 17.8193521594684 |                   |         | 0.394713168638849  |          |         |         |
| 6                                          | 92      | regulation of leukocyte mediated immunity                                                                                 |                  |                   |         |                    |          |         |         |
| GO:0042129                                 |         | 4.49497462692755e-06                                                                                                      | 16.1210526315789 |                   |         | 0.433326413396997  |          |         |         |
| 6                                          | 101     | regulation of T cell proliferation                                                                                        |                  |                   |         |                    |          |         |         |
| GO:0002252                                 |         | 5.12654125636125e-06                                                                                                      | 7.16704173486088 |                   |         | 1.65607916407169   |          |         |         |
| 10                                         | 386     | immune effector process                                                                                                   |                  |                   |         |                    |          |         |         |
| GO:0002696                                 |         | 6.46907816332389e-06                                                                                                      | 9.32609053497942 |                   |         | 0.999654003183171  |          |         |         |
| 8                                          | 233     | positive regulation of leukocyte activation                                                                               |                  |                   |         |                    |          |         |         |
| GO:0042098                                 |         | 1.10449759516756e-05                                                                                                      | 13.6578443877551 |                   |         | 0.50626254238461   |          |         |         |
| 6                                          | 118     | T cell proliferation                                                                                                      |                  |                   |         |                    |          |         |         |
| GO:0002283                                 |         | 1.21088113765642e-05                                                                                                      | 91.4046610169491 |                   |         | 0.0471939658155145 |          |         |         |
| 3                                          | 11      | neutrophil activation involved in immune response                                                                         |                  |                   |         |                    |          |         |         |
| GO:0050851                                 |         | 1.40087942779846e-05                                                                                                      | 13.0695970695971 |                   |         | 0.527714345028026  |          |         |         |
| 6                                          | 123     | antigen receptor-mediated signaling pathway                                                                               |                  |                   |         |                    |          |         |         |
| GO:0045576                                 |         | 1.45564056343773e-05                                                                                                      | 31.9421579532814 |                   |         | 0.15016261850391   |          |         |         |
| 4                                          | 35      | mast cell activation                                                                                                      |                  |                   |         |                    |          |         |         |
| Tissue: Nerve_Tibial=>Heart_Left_Ventricle |         | Type: asymmetric                                                                                                          |                  |                   |         |                    |          |         |         |
| SourceGene: FAM132A(ENSG00000184163.3)     |         |                                                                                                                           |                  |                   |         |                    |          |         |         |
| TargetGeneSet:                             |         | DNAJC11                                                                                                                   | RP11             | SLC39A1           | LRRC71  | TNFAIP6            | BTF3L4P2 | RPL15   | LNP1    |
| OSBPL11                                    | PPP1R2  | LETM1                                                                                                                     | SLC2A9           | RPS3A             | NDUFAF2 | SKP1               | MATR3    | RPS14   | TMEM14C |
| RXR                                        | RPS10   | RPL10A                                                                                                                    | RPL39P3          | MTO1              | ELM01   | ZNF706             | SYBU     | RPL8    | CHMP5   |
| FRMPD1                                     | RPL35   | TRMT112                                                                                                                   | SNX32            | CCDC59            | RILPL1  | ZNF605             | ESR2     | RPS3AP6 | BCL7C   |
| MIR4519                                    | SLC12A4 | RPL26                                                                                                                     | RPL19            | KCNH4             | BAIAP2  | LAMA3              | CABYR    | GPX4    | RPS15   |
| MOB3A                                      | RPL18A  | ZNF790                                                                                                                    | ZNF585B          | OPA3              | SNRPD2  | SIGLEC10           | UBE2S    | CTD     |         |
| SLC5A1                                     | XRCC6   | RAB11FIP1P1                                                                                                               |                  |                   |         |                    |          |         |         |
| GOBPID                                     | Pvalue  | OddsRatio                                                                                                                 | ExpCount         | Count             | Size    | Term               |          |         |         |
| GO:0006415                                 |         | 3.68790031645846e-15                                                                                                      | 56.2767857142857 |                   |         | 0.289668535049478  |          |         |         |

STable4\_20PerPair

|                                                                  |        |                                                                     |                  |                   |      |                    |       |       |        |      |
|------------------------------------------------------------------|--------|---------------------------------------------------------------------|------------------|-------------------|------|--------------------|-------|-------|--------|------|
| 11                                                               | 91     | translational termination                                           |                  |                   |      |                    |       |       |        |      |
| GO:0006414                                                       |        | 1.88173460707377e-14                                                | 47.8483282674772 |                   |      | 0.334232925057089  |       |       |        |      |
| 11                                                               | 105    | translational elongation                                            |                  |                   |      |                    |       |       |        |      |
| GO:0006614                                                       |        | 1.88173460707377e-14                                                | 47.8483282674772 |                   |      | 0.334232925057089  |       |       |        |      |
| 11                                                               | 105    | SRP-dependent cotranslational protein targeting to membrane         |                  |                   |      |                    |       |       |        |      |
| GO:0006613                                                       |        | 2.09493349418219e-14                                                | 47.3413533834586 |                   |      | 0.337416095771919  |       |       |        |      |
| 11                                                               | 106    | cotranslational protein targeting to membrane                       |                  |                   |      |                    |       |       |        |      |
| GO:0045047                                                       |        | 2.09493349418219e-14                                                | 47.3413533834586 |                   |      | 0.337416095771919  |       |       |        |      |
| 11                                                               | 106    | protein targeting to ER                                             |                  |                   |      |                    |       |       |        |      |
| GO:0072599                                                       |        | 2.09493349418219e-14                                                | 47.3413533834586 |                   |      | 0.337416095771919  |       |       |        |      |
| 11                                                               | 106    | establishment of protein localization to endoplasmic reticulum      |                  |                   |      |                    |       |       |        |      |
| GO:0019080                                                       |        | 3.12135750018348e-14                                                | 36.2234447735929 |                   |      | 0.480658777939243  |       |       |        |      |
| 12                                                               | 151    | viral genome expression                                             |                  |                   |      |                    |       |       |        |      |
| GO:0019083                                                       |        | 3.12135750018348e-14                                                | 36.2234447735929 |                   |      | 0.480658777939243  |       |       |        |      |
| 12                                                               | 151    | viral transcription                                                 |                  |                   |      |                    |       |       |        |      |
| GO:0070972                                                       |        | 7.01974491092106e-14                                                | 41.9967957276369 |                   |      | 0.375614144349872  |       |       |        |      |
| 11                                                               | 118    | protein localization to endoplasmic reticulum                       |                  |                   |      |                    |       |       |        |      |
| GO:0000184                                                       |        | 7.717444494046882e-14                                               | 41.6050264550265 |                   |      | 0.378797315064701  |       |       |        |      |
| 11                                                               | 119    | nuclear-transcribed mRNA catabolic process, nonsense-mediated decay |                  |                   |      |                    |       |       |        |      |
| GO:0019058                                                       |        | 2.02553255535598e-13                                                | 25.6367806505421 |                   |      | 0.735312435125597  |       |       |        |      |
| 13                                                               | 231    | viral infectious cycle                                              |                  |                   |      |                    |       |       |        |      |
| GO:0022415                                                       |        | 9.20617414433382e-13                                                | 22.5805422647528 |                   |      | 0.82762438585565   |       |       |        |      |
| 13                                                               | 260    | viral reproductive process                                          |                  |                   |      |                    |       |       |        |      |
| GO:0006413                                                       |        | 1.17672574858471e-12                                                | 31.7941236068896 |                   |      | 0.483841948654072  |       |       |        |      |
| 11                                                               | 152    | translational initiation                                            |                  |                   |      |                    |       |       |        |      |
| GO:0006612                                                       |        | 1.26504439078283e-12                                                | 31.5680080482897 |                   |      | 0.487025119368902  |       |       |        |      |
| 11                                                               | 153    | protein targeting to membrane                                       |                  |                   |      |                    |       |       |        |      |
| GO:0043624                                                       |        | 1.26504439078283e-12                                                | 31.5680080482897 |                   |      | 0.487025119368902  |       |       |        |      |
| 11                                                               | 153    | cellular protein complex disassembly                                |                  |                   |      |                    |       |       |        |      |
| GO:0043241                                                       |        | 1.8031805503896e-12                                                 | 30.4835762876579 |                   |      | 0.502940972943049  |       |       |        |      |
| 11                                                               | 158    | protein complex disassembly                                         |                  |                   |      |                    |       |       |        |      |
| GO:0000956                                                       |        | 3.77697590408088e-12                                                | 28.3394213381555 |                   |      | 0.537955850806173  |       |       |        |      |
| 11                                                               | 169    | nuclear-transcribed mRNA catabolic process                          |                  |                   |      |                    |       |       |        |      |
| GO:0016032                                                       |        | 4.34289999368037e-12                                                | 15.5027374963007 |                   |      | 1.43560999238807   |       |       |        |      |
| 15                                                               | 451    | viral reproduction                                                  |                  |                   |      |                    |       |       |        |      |
| GO:0034623                                                       |        | 5.19756755499635e-12                                                | 27.4604732690622 |                   |      | 0.55387170438032   |       |       |        |      |
| 11                                                               | 174    | cellular macromolecular complex disassembly                         |                  |                   |      |                    |       |       |        |      |
| GO:0006402                                                       |        | 6.66341867427501e-12                                                | 26.7952095808383 |                   |      | 0.566604387239637  |       |       |        |      |
| 11                                                               | 178    | mRNA catabolic process                                              |                  |                   |      |                    |       |       |        |      |
| GO:0032984                                                       |        | 7.08381264271001e-12                                                | 26.633843537415  | 0.569787557954467 |      |                    | 11    |       |        |      |
| 179                                                              |        | macromolecular complex disassembly                                  |                  |                   |      |                    |       |       |        |      |
| GO:0072594                                                       |        | 2.9338328188775e-11                                                 | 23.1431532198372 |                   |      | 0.649366825825202  |       |       |        |      |
| 11                                                               | 204    | establishment of protein localization to organelle                  |                  |                   |      |                    |       |       |        |      |
| GO:0006401                                                       |        | 3.09323206622306e-11                                                | 23.0222385861561 |                   |      | 0.652549996540032  |       |       |        |      |
| 11                                                               | 205    | RNA catabolic process                                               |                  |                   |      |                    |       |       |        |      |
| GO:0071845                                                       |        | 1.00890170914966e-09                                                | 16.269178440607  | 0.904020483011556 |      |                    | 11    |       |        |      |
| 284                                                              |        | cellular component disassembly at cellular level                    |                  |                   |      |                    |       |       |        |      |
| GO:0022411                                                       |        | 1.16935669744987e-09                                                | 16.0297060340382 |                   |      | 0.916753165870874  |       |       |        |      |
| 11                                                               | 288    | cellular component disassembly                                      |                  |                   |      |                    |       |       |        |      |
| GO:0033365                                                       |        | 1.94678745871024e-07                                                | 9.48503401360544 |                   |      | 1.50563974811432   |       |       |        |      |
| 11                                                               | 473    | protein localization to organelle                                   |                  |                   |      |                    |       |       |        |      |
| GO:0006605                                                       |        | 1.98851357911984e-07                                                | 9.46386917618019 |                   |      | 1.50882291882915   |       |       |        |      |
| 11                                                               | 474    | protein targeting                                                   |                  |                   |      |                    |       |       |        |      |
| Tissue: Nerve_Tibial=>Heart_Left_Ventricle                       |        | Type: asymmetric                                                    |                  |                   |      |                    |       |       |        |      |
| SourceGene: NDP(ENSG00000124479.8)                               |        |                                                                     |                  |                   |      |                    |       |       |        |      |
| TargetGeneSet: LCE1B SPRR1B LOR RASGRP3 ATP13A5-AS1 RP11 C8orf40 |        |                                                                     |                  |                   |      |                    |       |       |        |      |
| RPL35                                                            | TTC40  | ALDH3B2                                                             | TRIM29           | KRT2              | KRT1 | BRF1               | KRT15 | KRT14 | CD300E | SBSN |
| NCOA3                                                            | MT     |                                                                     |                  |                   |      |                    |       |       |        |      |
| GOBPID                                                           | Pvalue | OddsRatio                                                           | ExpCount         | Count             | Size | Term               |       |       |        |      |
| GO:0008544                                                       |        | 5.18751359582003e-11                                                | 65.1153184165232 |                   |      | 0.266763545775379  |       |       |        |      |
| 8                                                                | 257    | epidermis development                                               |                  |                   |      |                    |       |       |        |      |
| GO:0030216                                                       |        | 2.98334499526174e-08                                                | 80.6011235955056 |                   |      | 0.0975711023458584 |       |       |        |      |
| 5                                                                | 94     | keratinocyte differentiation                                        |                  |                   |      |                    |       |       |        |      |

Stable4\_20PerPair

|                                                                     |                                                       |                                                                     |                    |                   |
|---------------------------------------------------------------------|-------------------------------------------------------|---------------------------------------------------------------------|--------------------|-------------------|
| GO:0009913                                                          | 6.59063634319035e-08                                  | 68.2428571428571                                                    | 0.114178949553664  |                   |
| 5                                                                   | 110                                                   | epidermal cell differentiation                                      |                    |                   |
| GO:0031424                                                          | 8.21897370340797e-08                                  | 137.77990430622                                                     | 0.0435955989204899 | 4                 |
| 42                                                                  |                                                       | keratinization                                                      |                    |                   |
| GO:0030855                                                          | 2.26069284363087e-07                                  | 34.2028985507246                                                    | 0.292713307037575  |                   |
| 6                                                                   | 282                                                   | epithelial cell differentiation                                     |                    |                   |
| Tissue:                                                             | Heart_Left_Ventricle=>Nerve_Tibial                    | Type:                                                               | asymmetric         |                   |
| SourceGene:                                                         | NLGN4Y(ENSG00000165246.7)                             |                                                                     |                    |                   |
| TargetGeneSet:                                                      | ZNF684 RPS8 ITGB3BP RP11 RPL5 TLR5 C2orf43 LTBP1 FEZ2 |                                                                     |                    |                   |
| C2orf40 CXCR2P1 BCS1L RPL14 CTNNB1 NME6 RPL29 CPOX RPS3A BRD9 ANKH  |                                                       |                                                                     |                    |                   |
| CTD LYRM7 NDST1 RPL10A LRRCL1 MALSU1 SGCE RP4 DYNLL1 RPS6           |                                                       |                                                                     |                    |                   |
| MICU1 OAT TUT1 KLRD1 LETMD1 RPL18AP3 LINC00327 CARS2                |                                                       |                                                                     |                    |                   |
| OSTBETA RPS2 RPS15A LYRM1 WDR81 ALOX15B MYO19 HAP1 TMEM101 CDK5RAP3 |                                                       |                                                                     |                    |                   |
| TMC6 RPL17 ZNF44 RLN3 LPAR2 ZC3H4 RPL18 RPL13A RPS9 RPS5 ESF1       |                                                       |                                                                     |                    |                   |
| CXADR TUBGCP6                                                       |                                                       |                                                                     |                    |                   |
| GOBPID                                                              | Pvalue                                                | OddsRatio                                                           | ExpCount           | Count Size Term   |
| GO:0006415                                                          | 1.10615651250552e-20                                  | 81.4090909090909                                                    |                    | 0.289668535049478 |
| 14                                                                  | 91                                                    | translational termination                                           |                    |                   |
| GO:0006414                                                          | 9.22812056959534e-20                                  | 68.8173076923077                                                    |                    | 0.334232925057089 |
| 14                                                                  | 105                                                   | translational elongation                                            |                    |                   |
| GO:0006614                                                          | 9.22812056959534e-20                                  | 68.8173076923077                                                    |                    | 0.334232925057089 |
| 14                                                                  | 105                                                   | SRP-dependent cotranslational protein targeting to membrane         |                    |                   |
| GO:0006613                                                          | 1.06102922106085e-19                                  | 68.0645380434783                                                    |                    | 0.337416095771919 |
| 14                                                                  | 106                                                   | cotranslational protein targeting to membrane                       |                    |                   |
| GO:0045047                                                          | 1.06102922106085e-19                                  | 68.0645380434783                                                    |                    | 0.337416095771919 |
| 14                                                                  | 106                                                   | protein targeting to ER                                             |                    |                   |
| GO:0072599                                                          | 1.06102922106085e-19                                  | 68.0645380434783                                                    |                    | 0.337416095771919 |
| 14                                                                  | 106                                                   | establishment of protein localization to endoplasmic reticulum      |                    |                   |
| GO:0070972                                                          | 5.10763590601569e-19                                  | 60.1604567307692                                                    |                    | 0.375614144349872 |
| 14                                                                  | 118                                                   | protein localization to endoplasmic reticulum                       |                    |                   |
| GO:0000184                                                          | 5.77660916999985e-19                                  | 59.5833333333333                                                    |                    | 0.378797315064701 |
| 14                                                                  | 119                                                   | nuclear-transcribed mRNA catabolic process, nonsense-mediated decay |                    |                   |
| GO:0019080                                                          | 1.80407109799649e-17                                  | 45.5638686131387                                                    |                    | 0.480658777939243 |
| 14                                                                  | 151                                                   | viral genome expression                                             |                    |                   |
| GO:0019083                                                          | 1.80407109799649e-17                                  | 45.5638686131387                                                    |                    | 0.480658777939243 |
| 14                                                                  | 151                                                   | viral transcription                                                 |                    |                   |
| GO:0006413                                                          | 1.98295052106258e-17                                  | 45.2305253623188                                                    |                    | 0.483841948654072 |
| 14                                                                  | 152                                                   | translational initiation                                            |                    |                   |
| GO:0006612                                                          | 2.17812191695451e-17                                  | 44.9019784172662                                                    |                    | 0.487025119368902 |
| 14                                                                  | 153                                                   | protein targeting to membrane                                       |                    |                   |
| GO:0043624                                                          | 2.17812191695451e-17                                  | 44.9019784172662                                                    |                    | 0.487025119368902 |
| 14                                                                  | 153                                                   | cellular protein complex disassembly                                |                    |                   |
| GO:0043241                                                          | 3.44944755146313e-17                                  | 43.3276909722222                                                    |                    | 0.502940972943049 |
| 14                                                                  | 158                                                   | protein complex disassembly                                         |                    |                   |
| GO:0000956                                                          | 8.99965785951009e-17                                  | 40.2217741935484                                                    |                    | 0.537955850806173 |
| 14                                                                  | 169                                                   | nuclear-transcribed mRNA catabolic process                          |                    |                   |
| GO:0034623                                                          | 1.36163269298018e-16                                  | 38.951171875                                                        | 0.55387170438032   | 14                |
| 174                                                                 |                                                       | cellular macromolecular complex disassembly                         |                    |                   |
| GO:0006402                                                          | 1.87932361720925e-16                                  | 37.9904725609756                                                    |                    | 0.566604387239637 |
| 14                                                                  | 178                                                   | mRNA catabolic process                                              |                    |                   |
| GO:0032984                                                          | 2.03452495739994e-16                                  | 37.7575757575758                                                    |                    | 0.569787557954467 |
| 14                                                                  | 179                                                   | macromolecular complex disassembly                                  |                    |                   |
| GO:0072594                                                          | 1.28541013487958e-15                                  | 32.7319078947368                                                    |                    | 0.649366825825202 |
| 14                                                                  | 204                                                   | establishment of protein localization to organelle                  |                    |                   |
| GO:0006401                                                          | 1.37674422062526e-15                                  | 32.5582460732984                                                    |                    | 0.652549996540032 |
| 14                                                                  | 205                                                   | RNA catabolic process                                               |                    |                   |
| GO:0071845                                                          | 5.1628724778575e-15                                   | 25.4275092936803                                                    |                    | 0.904020483011556 |
| 15                                                                  | 284                                                   | cellular component disassembly at cellular level                    |                    |                   |
| GO:0022411                                                          | 6.34974776454939e-15                                  | 25.047855370436                                                     | 0.916753165870874  | 15                |
| 288                                                                 |                                                       | cellular component disassembly                                      |                    |                   |
| GO:0019058                                                          | 7.30900396665305e-15                                  | 28.6048387096774                                                    |                    | 0.735312435125597 |
| 14                                                                  | 231                                                   | viral infectious cycle                                              |                    |                   |
| GO:0022415                                                          | 3.76975017475305e-14                                  | 25.1811483739837                                                    |                    | 0.82762438585565  |

Stable4\_20PerPair

|                                            |        |                                              |                  |        |        |                   |        |         |                    |
|--------------------------------------------|--------|----------------------------------------------|------------------|--------|--------|-------------------|--------|---------|--------------------|
| 14                                         | 260    | viral reproductive process                   |                  |        |        |                   |        |         |                    |
| GO:0016032                                 |        | 6.55042999470477e-11                         | 13.9839816933638 |        |        |                   |        |         | 1.43560999238807   |
| 14                                         | 451    | viral reproduction                           |                  |        |        |                   |        |         |                    |
| GO:0033365                                 |        | 1.22949274315806e-10                         | 13.2927559912854 |        |        |                   |        |         | 1.50563974811432   |
| 14                                         | 473    | protein localization to organelle            |                  |        |        |                   |        |         |                    |
| GO:0006605                                 |        | 1.26422343196093e-10                         | 13.2629076086957 |        |        |                   |        |         | 1.50882291882915   |
| 14                                         | 474    | protein targeting                            |                  |        |        |                   |        |         |                    |
| GO:0042273                                 |        | 6.50895150443359e-06                         | 111.596899224806 |        |        |                   |        |         | 0.0381980485779531 |
| 3                                          | 12     | ribosomal large subunit biogenesis           |                  |        |        |                   |        |         |                    |
| Tissue: Heart_Left_Ventricle=>Nerve_Tibial |        | Type: asymmetric                             |                  |        |        |                   |        |         |                    |
| SourceGene:                                |        | RP1-64K7.4(ENSG00000229472.1)                |                  |        |        |                   |        |         |                    |
| TargetGeneSet:                             |        | C1QA                                         | C1QC             | C1QB   | RUNX3  | Clorf38           | LAPTM5 | BRD8    | CD2                |
| TBX15                                      | LYSMD1 | RP11                                         | SLAMF6           | CD84   | CD48   | RGS1              | PTPRC  | TLR5    | PPM1B              |
| IGKV2-28                                   |        | DUSP2                                        | ZAP70            | RNF149 | LAP3   | CD28              | TRAT1  | HCLS1   | FNDC3B             |
| KLHL7                                      | SH3TC1 | DTHD1                                        | DAPP1            | BBS12  | TLR2   | IL7R              | FYB    | EMB     | GZMK               |
|                                            |        |                                              |                  |        |        |                   |        |         | GZMA               |
| C5orf56                                    | HAVCR2 | RPS15AP18                                    | STK38            | FGD2   | PRDM1  | WASF1             | MAN1A1 | CTGF    |                    |
| CARD11                                     | AOAH   | IKZF1                                        | TFEC             | IRF5   | TBXAS1 | C8orf80           | SLA    | DOCK8   | AQP7P4             |
|                                            |        |                                              |                  |        |        |                   |        |         | FGD3               |
| SLC31A2                                    | AKNA   | MRC1                                         | PRF1             | FIBIN  | MS4A6A | MS4A4E            | MS4A7  | CCDC88B | TBC1D10C           |
| MYO7A                                      | IL10RA | CD3E                                         | LPAR5            | CD4    | CD163  | CD69              | SAT2   | ARHGAP9 | SELPLG             |
| ALOX5AP                                    | GPR183 | RNASE6                                       | U6               | RIN3   | FMN1   | PSTPIP1           | SPN    | RNF166  | ARRB2              |
| ACAP1                                      | GUCY2D | TMEM106A                                     |                  | HMHA1  | LINGO3 | EBI3              | STXBP2 | RASAL3  | IL12RB1            |
|                                            |        |                                              |                  |        |        |                   |        |         | HCST               |
| TGFB1                                      | C5AR1  | CD37                                         | SIGLEC11         |        | CD33   | HCK               | STK4   | CASS4   | ZNF831             |
| RGS19                                      | ITGB2  | CECR1                                        | NCF4             | MKL1   | WAS    | IL2RG             | BTK    | TSC22D3 | MTCP1              |
| GOBPID                                     | Pvalue | OddsRatio                                    | ExpCount         | Count  | Size   | Term              |        |         |                    |
| GO:0050867                                 |        | 6.16703954911104e-13                         | 12.9761737533092 |        |        |                   |        |         | 1.66078472078057   |
| 17                                         | 240    | positive regulation of cell activation       |                  |        |        |                   |        |         |                    |
| GO:0002696                                 |        | 5.04670518126635e-12                         | 12.4064077243801 |        |        |                   |        |         | 1.61234516642447   |
| 16                                         | 233    | positive regulation of leukocyte activation  |                  |        |        |                   |        |         |                    |
| GO:0050778                                 |        | 5.41880613303461e-12                         | 9.52277688316336 |        |        |                   |        |         | 2.5188568265172    |
| 364                                        |        | positive regulation of immune response       |                  |        |        |                   |        |         | 19                 |
| GO:0030098                                 |        | 9.28197829187571e-12                         | 13.2231559290383 |        |        |                   |        |         | 1.41166701266348   |
| 15                                         | 204    | lymphocyte differentiation                   |                  |        |        |                   |        |         |                    |
| GO:0002252                                 |        | 1.50708337585715e-11                         | 8.93786793151008 |        |        |                   |        |         | 2.67109542592208   |
| 19                                         | 386    | immune effector process                      |                  |        |        |                   |        |         |                    |
| GO:0050865                                 |        | 1.91997384763899e-11                         | 9.47347091932458 |        |        |                   |        |         | 2.3735381634489    |
| 343                                        |        | regulation of cell activation                |                  |        |        |                   |        |         | 18                 |
| GO:0051251                                 |        | 1.97286924531344e-11                         | 12.4861764705882 |        |        |                   |        |         | 1.48778631236593   |
| 15                                         | 215    | positive regulation of lymphocyte activation |                  |        |        |                   |        |         |                    |
| GO:0002694                                 |        | 6.42392528192572e-11                         | 9.46413284717819 |        |        |                   |        |         | 2.22129956404401   |
| 17                                         | 321    | regulation of leukocyte activation           |                  |        |        |                   |        |         |                    |
| GO:0051249                                 |        | 9.43043132679043e-11                         | 10.0474406991261 |        |        |                   |        |         | 1.95834198325375   |
| 16                                         | 283    | regulation of lymphocyte activation          |                  |        |        |                   |        |         |                    |
| GO:0002697                                 |        | 9.96774978837845e-11                         | 12.3303071757244 |        |        |                   |        |         | 1.39090720365373   |
| 14                                         | 201    | regulation of immune effector process        |                  |        |        |                   |        |         |                    |
| GO:0002253                                 |        | 2.1294807690829e-10                          | 9.46861854282349 |        |        |                   |        |         | 2.06906096463913   |
| 16                                         | 299    | activation of immune response                |                  |        |        |                   |        |         |                    |
| GO:0002521                                 |        | 2.4671329272346e-10                          | 9.36729936729937 |        |        |                   |        |         | 2.08982077364888   |
| 16                                         | 302    | leukocyte differentiation                    |                  |        |        |                   |        |         |                    |
| GO:0002703                                 |        | 7.17720097508706e-10                         | 19.3346883468835 |        |        |                   |        |         | 0.636634142965885  |
| 10                                         | 92     | regulation of leukocyte mediated immunity    |                  |        |        |                   |        |         |                    |
| GO:0030217                                 |        | 7.58713217794386e-10                         | 13.4535984848485 |        |        |                   |        |         | 1.07951006850737   |
| 12                                         | 156    | T cell differentiation                       |                  |        |        |                   |        |         |                    |
| GO:0046649                                 |        | 8.54058368578435e-10                         | 7.37137819570967 |        |        |                   |        |         | 2.99633243374161   |
| 18                                         | 433    | lymphocyte activation                        |                  |        |        |                   |        |         |                    |
| GO:0002449                                 |        | 1.66273990593222e-09                         | 12.4891495601173 |        |        |                   |        |         | 1.15562936820981   |
| 12                                         | 167    | lymphocyte mediated immunity                 |                  |        |        |                   |        |         |                    |
| GO:0002706                                 |        | 1.69853349330778e-09                         | 22.078125        |        |        | 0.505155352570756 |        |         | 9                  |
| 73                                         |        | regulation of lymphocyte mediated immunity   |                  |        |        |                   |        |         |                    |
| GO:0002443                                 |        | 2.20446041873009e-09                         | 10.6808893533031 |        |        |                   |        |         | 1.46010656701958   |
| 13                                         | 211    | leukocyte mediated immunity                  |                  |        |        |                   |        |         |                    |
| GO:0046651                                 |        | 2.3307192597608e-09                          | 12.0946022727273 |        |        |                   |        |         | 1.19022904989274   |
| 12                                         | 172    | lymphocyte proliferation                     |                  |        |        |                   |        |         |                    |
| GO:0030097                                 |        | 2.47490834918128e-09                         | 6.85963277610304 |        |        |                   |        |         | 3.20393052383918   |

STable4\_20PerPair

|            |     |                                                                                                                           |                      |                  |                   |
|------------|-----|---------------------------------------------------------------------------------------------------------------------------|----------------------|------------------|-------------------|
| 18         | 463 | hemopoiesis                                                                                                               | 2.65963372781222e-09 | 11.9436026936027 | 1.20406892256591  |
| GO:0032943 |     | mononuclear cell proliferation                                                                                            | 3.87037939776661e-09 | 10.1602011494253 | 1.52930593038544  |
| 12         | 174 | regulation of T cell activation                                                                                           | 4.34613577562348e-09 | 13.2126383374166 | 0.996470832468341 |
| GO:0050863 |     | regulation of lymphocyte proliferation                                                                                    | 4.43571420482504e-09 | 11.3751336898396 | 1.2594284132586   |
| 13         | 221 | leukocyte proliferation                                                                                                   | 4.67626092337837e-09 | 13.1131142042596 | 1.00339076880493  |
| GO:0050670 |     | regulation of mononuclear cell proliferation                                                                              | 4.83737255784548e-09 | 8.15421826625387 | 2.20745969137084  |
| 11         | 144 | T cell activation                                                                                                         | 6.68777336065435e-09 | 12.6369735672136 | 1.03799045048786  |
| GO:0070661 |     | regulation of leukocyte proliferation                                                                                     | 7.05979434556716e-09 | 6.38472158306489 | 3.42536848660992  |
| 182        |     | hemopoietic or lymphoid organ development                                                                                 | 8.1218685742489e-09  | 9.51004452728591 | 1.62618503909764  |
| GO:0032944 |     | immune response-activating signal transduction                                                                            | 1.14803998294445e-08 | 10.3848973607038 | 1.37014739464397  |
| 11         | 145 | adaptive immune response                                                                                                  | 1.14820459955949e-08 | 50.8262411347518 | 0.166078472078057 |
| GO:0042110 |     | T cell selection                                                                                                          | 1.54722792979759e-08 | 8.97569087796527 | 1.71614421147325  |
| 15         | 319 | immune response-regulating signaling pathway                                                                              | 1.63340291382369e-08 | 21.4287856071964 | 0.456715798214656 |
| GO:0070663 |     | positive regulation of T cell proliferation                                                                               | 1.99022653682482e-08 | 16.2152330428192 | 0.664313888312227 |
| 11         | 150 | positive regulation of lymphocyte proliferation                                                                           | 2.18132883609966e-08 | 16.0298451548452 | 0.671233824648813 |
| GO:0048534 |     | positive regulation of mononuclear cell proliferation                                                                     | 2.62938137882742e-08 | 10.9621488764045 | 1.18330911355616  |
| 18         | 495 | positive regulation of T cell activation                                                                                  | 2.65982143388681e-08 | 12.8527551942186 | 0.920351532765899 |
| GO:0002757 |     | immune response-activating cell surface receptor signaling pathway                                                        | 2.85428414469622e-08 | 15.498128245381  | 0.69199363365857  |
| 13         | 235 | positive regulation of leukocyte proliferation                                                                            | 3.11573362566166e-08 | 15.3285953177258 | 0.698913569995156 |
| GO:0002250 |     | regulation of T cell proliferation                                                                                        | 4.72833113101083e-08 | 10.3100462656973 | 1.25250847692201  |
| 12         | 198 | adaptive immune response based on somatic recombination of immune receptors built from immunoglobulin superfamily domains | 5.68250300970559e-08 | 11.7885572139303 | 0.996470832468341 |
| GO:0045058 |     | immune response-regulating cell surface receptor signaling pathway                                                        | 8.31079430657567e-08 | 62.890350877193  | 0.117638917721957 |
| 6          | 24  | thymic T cell selection                                                                                                   | 8.31237658421176e-08 | 6.48808049535604 | 2.73337485295135  |
| GO:0002764 |     | induction of apoptosis                                                                                                    | 8.33834134099843e-08 | 22.9073438572409 | 0.373676562175628 |
| 13         | 248 | positive regulation of B cell activation                                                                                  | 9.17451499795423e-08 | 6.43587774535402 | 2.75413466196111  |
| GO:0042102 |     | induction of programmed cell death                                                                                        | 1.00907522818003e-07 | 11.039627039627  | 1.05875025949761  |
| 8          | 66  | B cell activation                                                                                                         | 1.2109996796369e-07  | 12.9224720233895 | 0.816552487717113 |
| GO:0050671 |     | T cell proliferation                                                                                                      | 1.56154634860335e-07 | 20.6974772539289 | 0.408276243858556 |
| 9          | 96  | positive regulation of cytokine biosynthetic process                                                                      | 1.73242213071227e-07 | 12.3513591671486 | 0.851152169400042 |
| GO:0032946 |     | antigen receptor-mediated signaling pathway                                                                               | 4.03748991580462e-07 | 13.6263736263736 | 0.685073697321985 |
| 9          | 97  | regulation of lymphocyte differentiation                                                                                  | 4.03748991580462e-07 | 13.6263736263736 | 0.685073697321985 |
| GO:0050870 |     |                                                                                                                           |                      |                  |                   |

Stable4\_20PerPair

|            |     |                                                                                                                                         |                  |                    |                    |    |
|------------|-----|-----------------------------------------------------------------------------------------------------------------------------------------|------------------|--------------------|--------------------|----|
| 8          | 99  | T cell receptor signaling pathway                                                                                                       |                  |                    |                    |    |
| GO:0045060 |     | 6.86340650750316e-07                                                                                                                    | 85.3809523809524 |                    | 0.0761192997024427 |    |
| 4          | 11  | negative thymic T cell selection                                                                                                        |                  |                    |                    |    |
| GO:0001909 |     | 8.05595548383086e-07                                                                                                                    | 22.2781525687597 |                    | 0.325237007819528  |    |
| 6          | 47  | leukocyte mediated cytotoxicity                                                                                                         |                  |                    |                    |    |
| GO:0050900 |     | 8.47628373614584e-07                                                                                                                    | 7.58822667318026 |                    | 1.66770465711715   |    |
| 11         | 241 | leukocyte migration                                                                                                                     |                  |                    |                    |    |
| GO:0043383 |     | 1.02404447386817e-06                                                                                                                    | 74.703125        | 0.0830392360390284 |                    | 4  |
| 12         |     | negative T cell selection                                                                                                               |                  |                    |                    |    |
| GO:0002822 |     | 1.29170712742541e-06                                                                                                                    | 14.7217557814111 |                    | 0.553594906926856  |    |
| 7          | 80  | regulation of adaptive immune response based on somatic recombination of immune receptors built from immunoglobulin superfamily domains |                  |                    |                    |    |
| GO:0050864 |     | 1.40594890246263e-06                                                                                                                    | 14.5217959895379 |                    | 0.560514843263442  |    |
| 7          | 81  | regulation of B cell activation                                                                                                         |                  |                    |                    |    |
| GO:0002704 |     | 1.4713225342121e-06                                                                                                                     | 66.3981481481482 |                    | 0.0899591723756141 |    |
| 4          | 13  | negative regulation of leukocyte mediated immunity                                                                                      |                  |                    |                    |    |
| GO:0002707 |     | 1.4713225342121e-06                                                                                                                     | 66.3981481481482 |                    | 0.0899591723756141 |    |
| 4          | 13  | negative regulation of lymphocyte mediated immunity                                                                                     |                  |                    |                    |    |
| GO:0045086 |     | 1.4713225342121e-06                                                                                                                     | 66.3981481481482 |                    | 0.0899591723756141 |    |
| 4          | 13  | positive regulation of interleukin-2 biosynthetic process                                                                               |                  |                    |                    |    |
| GO:0001910 |     | 1.78219897861988e-06                                                                                                                    | 30.16            | 0.207598090097571  | 5                  | 30 |
|            |     | regulation of leukocyte mediated cytotoxicity                                                                                           |                  |                    |                    |    |
| GO:0006959 |     | 1.99315232100243e-06                                                                                                                    | 10.859649122807  | 0.844232233063456  |                    | 8  |
| 122        |     | humoral immune response                                                                                                                 |                  |                    |                    |    |
| GO:0046641 |     | 2.04891780529454e-06                                                                                                                    | 59.7541666666667 |                    | 0.0968791087121998 |    |
| 4          | 14  | positive regulation of alpha-beta T cell proliferation                                                                                  |                  |                    |                    |    |
| GO:0046634 |     | 2.08004396836927e-06                                                                                                                    | 18.6304819800261 |                    | 0.380596498512214  |    |
| 6          | 55  | regulation of alpha-beta T cell activation                                                                                              |                  |                    |                    |    |
| GO:0002819 |     | 2.28410014652837e-06                                                                                                                    | 13.4270161290323 |                    | 0.602034461282956  |    |
| 7          | 87  | regulation of adaptive immune response                                                                                                  |                  |                    |                    |    |
| GO:0042035 |     | 3.0933376075761e-06                                                                                                                     | 12.7840501792115 |                    | 0.629714206629299  |    |
| 7          | 91  | regulation of cytokine biosynthetic process                                                                                             |                  |                    |                    |    |
| GO:0001911 |     | 3.18327162209952e-06                                                                                                                    | 221.89175257732  | 0.0345996816829285 |                    | 3  |
| 5          |     | negative regulation of leukocyte mediated cytotoxicity                                                                                  |                  |                    |                    |    |
| GO:0033077 |     | 3.85292758948487e-06                                                                                                                    | 16.5911025145068 |                    | 0.422116116531728  |    |
| 6          | 61  | T cell differentiation in thymus                                                                                                        |                  |                    |                    |    |
| GO:0045621 |     | 4.2420269848367e-06                                                                                                                     | 16.2936930091185 |                    | 0.429036052868314  |    |
| 6          | 62  | positive regulation of lymphocyte differentiation                                                                                       |                  |                    |                    |    |
| GO:0002699 |     | 4.42872181967054e-06                                                                                                                    | 12.0616165277274 |                    | 0.664313888312227  |    |
| 7          | 96  | positive regulation of immune effector process                                                                                          |                  |                    |                    |    |
| GO:0031341 |     | 4.5622148997105e-06                                                                                                                     | 24.3123938879457 |                    | 0.249117708117085  |    |
| 5          | 36  | regulation of cell killing                                                                                                              |                  |                    |                    |    |
| GO:0042089 |     | 5.81529802683322e-06                                                                                                                    | 11.5395999537519 |                    | 0.69199363365857   |    |
| 7          | 100 | cytokine biosynthetic process                                                                                                           |                  |                    |                    |    |
| GO:0046640 |     | 6.1315496243756e-06                                                                                                                     | 42.6696428571429 |                    | 0.124558854058543  |    |
| 4          | 18  | regulation of alpha-beta T cell proliferation                                                                                           |                  |                    |                    |    |
| GO:0043900 |     | 6.21326030865359e-06                                                                                                                    | 11.4160375200183 |                    | 0.698913569995156  |    |
| 7          | 101 | regulation of multi-organism process                                                                                                    |                  |                    |                    |    |
| GO:0031342 |     | 6.33450389734255e-06                                                                                                                    | 147.917525773196 |                    | 0.0415196180195142 |    |
| 3          | 6   | negative regulation of cell killing                                                                                                     |                  |                    |                    |    |
| GO:0042107 |     | 6.63361502968287e-06                                                                                                                    | 11.2950764006791 |                    | 0.705833506331742  |    |
| 7          | 102 | cytokine metabolic process                                                                                                              |                  |                    |                    |    |
| GO:0001817 |     | 6.77334646325785e-06                                                                                                                    | 5.50327482315955 |                    | 2.48425714483427   |    |
| 12         | 359 | regulation of cytokine production                                                                                                       |                  |                    |                    |    |
| GO:0045076 |     | 7.72543885785311e-06                                                                                                                    | 39.8222222222222 |                    | 0.131478790395128  |    |
| 4          | 19  | regulation of interleukin-2 biosynthetic process                                                                                        |                  |                    |                    |    |
| GO:0001906 |     | 7.95559633014956e-06                                                                                                                    | 14.4761904761905 |                    | 0.477475607224414  |    |
| 6          | 69  | cell killing                                                                                                                            |                  |                    |                    |    |
| GO:0046635 |     | 1.12109039081268e-05                                                                                                                    | 19.8240997229917 |                    | 0.297557262473185  |    |
| 5          | 43  | positive regulation of alpha-beta T cell activation                                                                                     |                  |                    |                    |    |
| GO:0042094 |     | 1.18028222758029e-05                                                                                                                    | 35.1323529411765 |                    | 0.1453186630683    | 4  |
| 21         |     | interleukin-2 biosynthetic process                                                                                                      |                  |                    |                    |    |
| GO:0046633 |     | 1.18028222758029e-05                                                                                                                    | 35.1323529411765 |                    | 0.1453186630683    | 4  |



Stable4\_20PerPair

|                                             |                                 |                                                                     |                  |                   |           |                   |           |          |          |
|---------------------------------------------|---------------------------------|---------------------------------------------------------------------|------------------|-------------------|-----------|-------------------|-----------|----------|----------|
| 21                                          | alpha-beta T cell proliferation |                                                                     |                  |                   |           |                   |           |          |          |
| GO:0051607                                  |                                 | 1.30398546158758e-05                                                | 10.1151349158044 |                   |           | 0.781952806034184 |           |          |          |
| 7                                           | 113                             | defense response to virus                                           |                  |                   |           |                   |           |          |          |
| GO:0002831                                  |                                 | 1.39536464786824e-05                                                | 13.022188449848  | 0.525915161580513 |           |                   | 6         |          |          |
| 76                                          |                                 | regulation of response to biotic stimulus                           |                  |                   |           |                   |           |          |          |
| GO:0002698                                  |                                 | 1.57045022338153e-05                                                | 18.3697047496791 |                   |           | 0.318317071482942 |           |          |          |
| 5                                           | 46                              | negative regulation of immune effector process                      |                  |                   |           |                   |           |          |          |
| GO:0050777                                  |                                 | 1.74781816011287e-05                                                | 17.9310776942356 |                   |           | 0.325237007819528 |           |          |          |
| 5                                           | 47                              | negative regulation of immune response                              |                  |                   |           |                   |           |          |          |
| GO:0001816                                  |                                 | 1.7671017577208e-05                                                 | 4.97317825777356 |                   |           | 2.73337485295135  |           |          |          |
| 12                                          | 395                             | cytokine production                                                 |                  |                   |           |                   |           |          |          |
| Tissue: Heart_Left_Ventricle=>Nerve_Tibial  |                                 | Type: asymmetric                                                    |                  |                   |           |                   |           |          |          |
| SourceGene: RP11-598F7.6(ENSG00000256540.1) |                                 |                                                                     |                  |                   |           |                   |           |          |          |
| TargetGeneSet:                              |                                 | DFFB                                                                | SNHG3            | RPS8              | RPL5      | RTCD1             | NBPF12    | RPS27    | LHX4     |
| ANGEL2                                      | TP53BP2                         | LTBP1                                                               | PRKD3            | PMS1              | RPE       | CXCR2P1           | STRA13    | RPL29    | ARHGAP31 |
| IFT122                                      | DNAJC19                         | RP11                                                                | CRYGS            | EEF1A1P9          |           | RPS3A             | BRD9      | ADAMTS16 | CTD      |
| SERINC5                                     | NDST1                           | RPL15P3                                                             | RPS10            | RPL10A            | RP3       | CREB5             | CTB       | FASTK    | FDFT1    |
| SULF1                                       | COL14A1                         | SHARPIN                                                             | DNAJB5           | NR4A3             | DPP7      | SSNA1             | FAM35B    | ASAH2B   | MICU1    |
| RPS3AP5                                     | MGEA5                           | OAT                                                                 | FAM160A2         |                   | ZBED5     | TUT1              | ARF3      | LETMD1   | RPL18AP3 |
| PPTC7                                       | RPLP0                           | RPSAP54                                                             | PARP4-AS1        |                   | HNRNPA1L2 |                   | C14orf28  |          | POLR2M   |
| RASL12                                      | NUBP2                           | RPS2                                                                | TNRC6A           | ZNF23             | RPL13     | TMUB2             | CDK5RAP3  |          | EPX      |
| RP13                                        | MAPRE2                          | RPL17                                                               | ZNF44            | LPAR2             | RPSAP58   | HAMP              | HAUS5     | U2AF1L4  | PHLDB3   |
| RPL18                                       | RPL13A                          | NAPSA                                                               | ZNF761           | RPS5              | RPL41P1   | RPL12P4           | LINC00478 |          | YDJC     |
| FAM3C2                                      |                                 |                                                                     |                  |                   |           |                   |           |          |          |
| GOBPID                                      | Pvalue                          | OddsRatio                                                           | ExpCount         | Count             | Size      | Term              |           |          |          |
| GO:0006415                                  |                                 | 4.06302085636613e-18                                                | 49.0806174957118 |                   |           | 0.42190851844163  |           |          |          |
| 14                                          | 91                              | translational termination                                           |                  |                   |           |                   |           |          |          |
| GO:0006414                                  |                                 | 3.32537700549594e-17                                                | 41.489114658926  | 0.486817521278804 |           |                   |           |          | 14       |
| 105                                         |                                 | translational elongation                                            |                  |                   |           |                   |           |          |          |
| GO:0006614                                  |                                 | 3.32537700549594e-17                                                | 41.489114658926  | 0.486817521278804 |           |                   |           |          | 14       |
| 105                                         |                                 | SRP-dependent cotranslational protein targeting to membrane         |                  |                   |           |                   |           |          |          |
| GO:0006613                                  |                                 | 3.81822569968961e-17                                                | 41.0352748154225 |                   |           | 0.491453878624317 |           |          |          |
| 14                                          | 106                             | cotranslational protein targeting to membrane                       |                  |                   |           |                   |           |          |          |
| GO:0045047                                  |                                 | 3.81822569968961e-17                                                | 41.0352748154225 |                   |           | 0.491453878624317 |           |          |          |
| 14                                          | 106                             | protein targeting to ER                                             |                  |                   |           |                   |           |          |          |
| GO:0072599                                  |                                 | 3.81822569968961e-17                                                | 41.0352748154225 |                   |           | 0.491453878624317 |           |          |          |
| 14                                          | 106                             | establishment of protein localization to endoplasmic reticulum      |                  |                   |           |                   |           |          |          |
| GO:0070972                                  |                                 | 1.80813913102758e-16                                                | 36.2699564586357 |                   |           | 0.547090166770466 |           |          |          |
| 14                                          | 118                             | protein localization to endoplasmic reticulum                       |                  |                   |           |                   |           |          |          |
| GO:0000184                                  |                                 | 2.04216684217347e-16                                                | 35.9220125786164 |                   |           | 0.551726524115978 |           |          |          |
| 14                                          | 119                             | nuclear-transcribed mRNA catabolic process, nonsense-mediated decay |                  |                   |           |                   |           |          |          |
| GO:0006612                                  |                                 | 2.52622870824264e-16                                                | 29.7784280936455 |                   |           | 0.7093626738634   |           |          | 15       |
| 153                                         |                                 | protein targeting to membrane                                       |                  |                   |           |                   |           |          |          |
| GO:0043241                                  |                                 | 4.11738341002713e-16                                                | 28.727138246369  | 0.732544460590963 |           |                   |           |          | 15       |
| 158                                         |                                 | protein complex disassembly                                         |                  |                   |           |                   |           |          |          |
| GO:0032984                                  |                                 | 2.70651444135387e-15                                                | 25.0117260787992 |                   |           | 0.829907964846723 |           |          |          |
| 15                                          | 179                             | macromolecular complex disassembly                                  |                  |                   |           |                   |           |          |          |
| GO:0019080                                  |                                 | 6.10466740217526e-15                                                | 27.4697700041317 |                   |           | 0.700089959172376 |           |          |          |
| 14                                          | 151                             | viral genome expression                                             |                  |                   |           |                   |           |          |          |
| GO:0019083                                  |                                 | 6.10466740217526e-15                                                | 27.4697700041317 |                   |           | 0.700089959172376 |           |          |          |
| 14                                          | 151                             | viral transcription                                                 |                  |                   |           |                   |           |          |          |
| GO:0006413                                  |                                 | 6.70078678434336e-15                                                | 27.2687995624829 |                   |           | 0.704726316517888 |           |          |          |
| 14                                          | 152                             | translational initiation                                            |                  |                   |           |                   |           |          |          |
| GO:0043624                                  |                                 | 7.35024214253945e-15                                                | 27.0707207818651 |                   |           | 0.7093626738634   |           |          | 14       |
| 153                                         |                                 | cellular protein complex disassembly                                |                  |                   |           |                   |           |          |          |
| GO:0022411                                  |                                 | 1.06073992363403e-14                                                | 17.7063468634686 |                   |           | 1.33527091550758  |           |          |          |
| 17                                          | 288                             | cellular component disassembly                                      |                  |                   |           |                   |           |          |          |
| GO:0072594                                  |                                 | 1.90503835490424e-14                                                | 21.6651404151404 |                   |           | 0.945816898484534 |           |          |          |
| 15                                          | 204                             | establishment of protein localization to organelle                  |                  |                   |           |                   |           |          |          |
| GO:0000956                                  |                                 | 2.97119394913301e-14                                                | 24.2490566037736 |                   |           | 0.783544391391599 |           |          |          |
| 14                                          | 169                             | nuclear-transcribed mRNA catabolic process                          |                  |                   |           |                   |           |          |          |
| GO:0034623                                  |                                 | 4.46468179576022e-14                                                | 23.4830188679245 |                   |           | 0.806726178119161 |           |          |          |
| 14                                          | 174                             | cellular macromolecular complex disassembly                         |                  |                   |           |                   |           |          |          |

Stable4\_20PerPair

|                                                             |                      |                                                                     |                   |
|-------------------------------------------------------------|----------------------|---------------------------------------------------------------------|-------------------|
| GO:0006402                                                  | 6.12847100379525e-14 | 22.9038196042338                                                    | 0.825271607501211 |
| 14                                                          | 178                  | mRNA catabolic process                                              |                   |
| GO:0071845                                                  | 1.48462342162118e-13 | 16.5244366403278                                                    | 1.31672548612553  |
| 16                                                          | 284                  | cellular component disassembly at cellular level                    |                   |
| GO:0006401                                                  | 4.32642861684128e-13 | 19.6287661760348                                                    | 0.950453255830046 |
| 14                                                          | 205                  | RNA catabolic process                                               |                   |
| GO:0019058                                                  | 2.21635904397534e-12 | 17.2452830188679                                                    | 1.07099854681337  |
| 14                                                          | 231                  | viral infectious cycle                                              |                   |
| GO:0022415                                                  | 1.09848634987544e-11 | 15.1811627550238                                                    | 1.20545290983323  |
| 14                                                          | 260                  | viral reproductive process                                          |                   |
| GO:0006605                                                  | 3.36150423800675e-10 | 9.53917287438993                                                    | 2.19763338177289  |
| 16                                                          | 474                  | protein targeting                                                   |                   |
| GO:0033365                                                  | 3.07755665728302e-09 | 8.77099428955324                                                    | 2.19299702442738  |
| 15                                                          | 473                  | protein localization to organelle                                   |                   |
| GO:0016032                                                  | 1.46677606973516e-08 | 8.43046500582876                                                    | 2.0909971628261   |
| 451                                                         |                      | viral reproduction                                                  | 14                |
| Tissue: Nerve_Tibial=>Heart_Left_Ventricle Type: asymmetric |                      |                                                                     |                   |
| SourceGene: U2AF1L4(ENSG00000161265.6)                      |                      |                                                                     |                   |
| TargetGeneSet:                                              | MRPL20               | UBR4                                                                | USP24             |
|                                                             | WARS2                | RPS7                                                                | UBC               |
|                                                             | TXNDC9               | SEC13                                                               |                   |
| HIGD1A                                                      | RPL24                | FAM162A                                                             | BCL6              |
|                                                             | HMGB2                | RP11                                                                | ROPN1L            |
|                                                             | SUB1                 | TBCA                                                                | APC               |
| HINT1                                                       | NDFIP1               | IP6K3                                                               | RPL10A            |
|                                                             | MRPL32               | HMGN3                                                               | C6orf225          |
|                                                             | RP1                  | SEC61G                                                              |                   |
| DNAJB9                                                      | RPS20                | RPL30                                                               | C9orf131          |
|                                                             | PHF2                 | RC3H2                                                               | ASB6              |
|                                                             | POLR3A               | RPL13AP5                                                            |                   |
| PRDM11                                                      | CELF1                | C11orf10                                                            | AHNAK             |
|                                                             | MTA2                 | OTUB1                                                               | IGSF9B            |
|                                                             | RPL18AP3             |                                                                     |                   |
| C12orf45                                                    | ARPC3                | RPL6                                                                | MED13L            |
|                                                             | MED4                 | DAD1                                                                | SCFD1             |
|                                                             | CDC42BPB             |                                                                     |                   |
| RPS3AP6                                                     | RPL4                 | SEC11A                                                              | RPS15A            |
|                                                             | CYB5B                | RPS7P1                                                              | KIAA0100          |
|                                                             | COPZ2                | RPL17                                                               |                   |
| RPL18A                                                      | COPE                 | COX6B1                                                              | PAK4              |
|                                                             | AP2S1                | ATP5E                                                               | MRPL40            |
|                                                             | TCF20                | PRDX4                                                               | UXT               |
| MORF4L2                                                     | MCTS1                |                                                                     |                   |
| GOBPID                                                      | Pvalue               | OddsRatio                                                           | ExpCount          |
|                                                             | Count                | Size                                                                | Term              |
| GO:0006614                                                  | 3.60079167193237e-16 | 42.0910326086956                                                    | 0.443221922358314 |
| 13                                                          | 105                  | SRP-dependent cotranslational protein targeting to membrane         |                   |
| GO:0006613                                                  | 4.09140166898113e-16 | 41.6355286738351                                                    | 0.447443083523632 |
| 13                                                          | 106                  | cotranslational protein targeting to membrane                       |                   |
| GO:0045047                                                  | 4.09140166898113e-16 | 41.6355286738351                                                    | 0.447443083523632 |
| 13                                                          | 106                  | protein targeting to ER                                             |                   |
| GO:0072599                                                  | 4.09140166898113e-16 | 41.6355286738351                                                    | 0.447443083523632 |
| 13                                                          | 106                  | establishment of protein localization to endoplasmic reticulum      |                   |
| GO:0070972                                                  | 1.72313424537865e-15 | 36.8462301587302                                                    | 0.498097017507439 |
| 13                                                          | 118                  | protein localization to endoplasmic reticulum                       |                   |
| GO:0006612                                                  | 5.31689166446401e-14 | 27.5669642857143                                                    | 0.645837658293544 |
| 13                                                          | 153                  | protein targeting to membrane                                       |                   |
| GO:0006415                                                  | 1.07069485258902e-13 | 39.3525                                                             | 0.384125666043872 |
|                                                             |                      |                                                                     | 11                |
|                                                             |                      |                                                                     | 91                |
| translational termination                                   |                      |                                                                     |                   |
| GO:0006414                                                  | 5.39047585870216e-13 | 33.4587234042553                                                    | 0.443221922358314 |
| 11                                                          | 105                  | translational elongation                                            |                   |
| GO:0043624                                                  | 1.43091558368718e-12 | 24.748588797221                                                     | 0.645837658293544 |
| 153                                                         |                      | cellular protein complex disassembly                                | 12                |
| GO:0043241                                                  | 2.10175972426795e-12 | 23.8926474699469                                                    | 0.66694346412013  |
| 12                                                          | 158                  | protein complex disassembly                                         |                   |
| GO:0000184                                                  | 2.18133588763371e-12 | 29.092962962963                                                     | 0.502318178672756 |
| 119                                                         |                      | nuclear-transcribed mRNA catabolic process, nonsense-mediated decay | 11                |
| GO:0072594                                                  | 2.18258509004625e-12 | 20.133835078534                                                     | 0.861116877724725 |
| 204                                                         |                      | establishment of protein localization to organelle                  | 13                |
| GO:0034623                                                  | 6.61961889197239e-12 | 21.5086923658352                                                    | 0.734482042765207 |
| 12                                                          | 174                  | cellular macromolecular complex disassembly                         |                   |
| GO:0032984                                                  | 9.2560710604677e-12  | 20.8573872662838                                                    | 0.755587848591793 |
| 12                                                          | 179                  | macromolecular complex disassembly                                  |                   |
| GO:0019080                                                  | 2.99890731462083e-11 | 22.3928571428571                                                    | 0.637395335962909 |
| 11                                                          | 151                  | viral genome expression                                             |                   |
| GO:0019083                                                  | 2.99890731462083e-11 | 22.3928571428571                                                    | 0.637395335962909 |
| 11                                                          | 151                  | viral transcription                                                 |                   |
| GO:0006413                                                  | 3.2225444616925e-11  | 22.2324822695035                                                    | 0.641616497128226 |
| 11                                                          | 152                  | translational initiation                                            |                   |
| GO:0000956                                                  | 1.01763794507333e-10 | 19.8167088607595                                                    | 0.71337623693862  |

STable4\_20PerPair

|            |     |                                                                     |                  |                   |  |  |    |                   |  |
|------------|-----|---------------------------------------------------------------------|------------------|-------------------|--|--|----|-------------------|--|
| 11         | 169 | nuclear-transcribed mRNA catabolic process                          |                  |                   |  |  |    |                   |  |
| GO:0071845 |     | 1.40210960078767e-10                                                | 14.1103167281673 |                   |  |  |    | 1.19880977095011  |  |
| 13         | 284 | cellular component disassembly at cellular level                    |                  |                   |  |  |    |                   |  |
| GO:0022411 |     | 1.66728785202561e-10                                                | 13.9011363636364 |                   |  |  |    | 1.21569441561138  |  |
| 13         | 288 | cellular component disassembly                                      |                  |                   |  |  |    |                   |  |
| GO:0006402 |     | 1.77991700667082e-10                                                | 18.7368862275449 |                   |  |  |    | 0.751366687426476 |  |
| 11         | 178 | mRNA catabolic process                                              |                  |                   |  |  |    |                   |  |
| GO:0006401 |     | 8.0514033024519e-10                                                 | 16.0985567010309 |                   |  |  |    | 0.865338038890042 |  |
| 11         | 205 | RNA catabolic process                                               |                  |                   |  |  |    |                   |  |
| GO:0019058 |     | 2.84226767064228e-09                                                | 14.17            | 0.975088229188292 |  |  | 11 | 231               |  |
|            |     | viral infectious cycle                                              |                  |                   |  |  |    |                   |  |
| GO:0033365 |     | 7.35475100774916e-09                                                | 9.04065266768646 |                   |  |  |    | 1.99660923119507  |  |
| 14         | 473 | protein localization to organelle                                   |                  |                   |  |  |    |                   |  |
| GO:0006605 |     | 7.5550260948262e-09                                                 | 9.02035152636448 |                   |  |  |    | 2.00083039236039  |  |
| 14         | 474 | protein targeting                                                   |                  |                   |  |  |    |                   |  |
| GO:0022415 |     | 9.77451514386162e-09                                                | 12.4940562248996 |                   |  |  |    | 1.09750190298249  |  |
| 11         | 260 | viral reproductive process                                          |                  |                   |  |  |    |                   |  |
| GO:0016032 |     | 3.20819743699977e-07                                                | 7.78262284412626 |                   |  |  |    | 1.90374368555809  |  |
| 12         | 451 | viral reproduction                                                  |                  |                   |  |  |    |                   |  |
|            |     | Tissue: Nerve_Tibial=>Heart_Left_Ventricle                          |                  |                   |  |  |    |                   |  |
|            |     | Type: asymmetric                                                    |                  |                   |  |  |    |                   |  |
|            |     | SourceGene: U6(ENSG00000206712.1)                                   |                  |                   |  |  |    |                   |  |
|            |     | TargetGeneSet: MRPL20 CAMTA1 SZT2 CMPK1 RP4 BRP44 RPS7 UBC          |                  |                   |  |  |    |                   |  |
|            |     | BOLA3 UBE2E3 HIGD1A CHMP2B NDUFB4 RP11 RPL35A RPL34 NDUFC1 NDUFS6   |                  |                   |  |  |    |                   |  |
|            |     | NDUFAF2 GEMIN5 RN5S201 HCP5 C4B ABCC10 RAB23 HMG3 MMS22L MRPS12     |                  |                   |  |  |    |                   |  |
|            |     | ZC2HC1B CYCS MRPS24 INTS4L2 BRI3 RPS20 EEF1D RPL8 NDUFB6 RPL35      |                  |                   |  |  |    |                   |  |
|            |     | RPL27A MYBPC3 FAU NDUFS8 RPL18AP3 MRP63 ABCD4 NPC2 GTF2A2           |                  |                   |  |  |    |                   |  |
|            |     | RPLP1 CTD IFT140 CTA CLN3 MINK1 FAM106A ANAPC11 RAB12 GPX4          |                  |                   |  |  |    |                   |  |
|            |     | RPS15 MAP2K2 RPL36 GLTSCR2 SEPW1 RPL18 DGCR6L ARFGAP3 PNPLA4 SYAP1  |                  |                   |  |  |    |                   |  |
|            |     | DYNLT3 MED12                                                        |                  |                   |  |  |    |                   |  |
|            |     | GOBPID Pvalue OddsRatio ExpCount Count Size Term                    |                  |                   |  |  |    |                   |  |
| GO:0006414 |     | 3.63490671144248e-18                                                | 50.006993006993  | 0.421424122898069 |  |  |    | 14                |  |
| 105        |     | translational elongation                                            |                  |                   |  |  |    |                   |  |
| GO:0006415 |     | 2.51969853306545e-17                                                | 53.0185185185185 |                   |  |  |    | 0.365234239844993 |  |
| 13         | 91  | translational termination                                           |                  |                   |  |  |    |                   |  |
| GO:0006614 |     | 1.76159372811462e-16                                                | 44.9065217391304 |                   |  |  |    | 0.421424122898069 |  |
| 13         | 105 | SRP-dependent cotranslational protein targeting to membrane         |                  |                   |  |  |    |                   |  |
| GO:0006613 |     | 2.00200048842737e-16                                                | 44.4205495818399 |                   |  |  |    | 0.425437685973289 |  |
| 13         | 106 | cotranslational protein targeting to membrane                       |                  |                   |  |  |    |                   |  |
| GO:0045047 |     | 2.00200048842737e-16                                                | 44.4205495818399 |                   |  |  |    | 0.425437685973289 |  |
| 13         | 106 | protein targeting to ER                                             |                  |                   |  |  |    |                   |  |
| GO:0072599 |     | 2.00200048842737e-16                                                | 44.4205495818399 |                   |  |  |    | 0.425437685973289 |  |
| 13         | 106 | establishment of protein localization to endoplasmic reticulum      |                  |                   |  |  |    |                   |  |
| GO:0070972 |     | 8.4512898968713e-16                                                 | 39.3108994708995 |                   |  |  |    | 0.473600442875926 |  |
| 13         | 118 | protein localization to endoplasmic reticulum                       |                  |                   |  |  |    |                   |  |
| GO:0000184 |     | 9.46016673155329e-16                                                | 38.9373165618449 |                   |  |  |    | 0.477614005951145 |  |
| 13         | 119 | nuclear-transcribed mRNA catabolic process, nonsense-mediated decay |                  |                   |  |  |    |                   |  |
| GO:0019080 |     | 2.20982379957687e-14                                                | 29.841384863124  | 0.606048024358176 |  |  |    | 13                |  |
| 151        |     | viral genome expression                                             |                  |                   |  |  |    |                   |  |
| GO:0019083 |     | 2.20982379957687e-14                                                | 29.841384863124  | 0.606048024358176 |  |  |    | 13                |  |
| 151        |     | viral transcription                                                 |                  |                   |  |  |    |                   |  |
| GO:0006413 |     | 2.40945640094878e-14                                                | 29.624620303757  | 0.610061587433396 |  |  |    | 13                |  |
| 152        |     | translational initiation                                            |                  |                   |  |  |    |                   |  |
| GO:0006612 |     | 2.62551825901736e-14                                                | 29.4109523809524 |                   |  |  |    | 0.614075150508615 |  |
| 13         | 153 | protein targeting to membrane                                       |                  |                   |  |  |    |                   |  |
| GO:0043624 |     | 2.62551825901736e-14                                                | 29.4109523809524 |                   |  |  |    | 0.614075150508615 |  |
| 13         | 153 | cellular protein complex disassembly                                |                  |                   |  |  |    |                   |  |
| GO:0043241 |     | 3.99794444238319e-14                                                | 28.3868199233716 |                   |  |  |    | 0.634142965884714 |  |
| 13         | 158 | protein complex disassembly                                         |                  |                   |  |  |    |                   |  |
| GO:0000956 |     | 9.60689568646353e-14                                                | 26.3648148148148 |                   |  |  |    | 0.678292159712131 |  |
| 13         | 169 | nuclear-transcribed mRNA catabolic process                          |                  |                   |  |  |    |                   |  |
| GO:0034623 |     | 1.40252027061988e-13                                                | 25.5370600414079 |                   |  |  |    | 0.698359975088229 |  |
| 13         | 174 | cellular macromolecular complex disassembly                         |                  |                   |  |  |    |                   |  |
| GO:0006402 |     | 1.88255282837985e-13                                                | 24.9109764309764 |                   |  |  |    | 0.714414227389108 |  |

STable4\_20PerPair

|                                            |          |                                                             |                  |                 |         |                    |         |                   |          |      |
|--------------------------------------------|----------|-------------------------------------------------------------|------------------|-----------------|---------|--------------------|---------|-------------------|----------|------|
| 13                                         | 178      | mRNA catabolic process                                      |                  |                 |         |                    |         |                   |          |      |
| GO:0032984                                 |          | 2.0240585564025e-13                                         | 24.7591700133869 |                 |         |                    |         | 0.718427790464328 |          |      |
| 13                                         | 179      | macromolecular complex disassembly                          |                  |                 |         |                    |         |                   |          |      |
| GO:0072594                                 |          | 1.0885229075839e-12                                         | 21.4806282722513 |                 |         |                    |         | 0.81876686734482  |          |      |
| 13                                         | 204      | establishment of protein localization to organelle          |                  |                 |         |                    |         |                   |          |      |
| GO:0006401                                 |          | 1.15882951268592e-12                                        | 21.3672453703704 |                 |         |                    |         | 0.82278043042004  |          |      |
| 13                                         | 205      | RNA catabolic process                                       |                  |                 |         |                    |         |                   |          |      |
| GO:0071845                                 |          | 4.35509721910966e-12                                        | 16.643265993266  | 1.1398519133624 | 14      |                    |         | 284               |          |      |
|                                            |          | cellular component disassembly at cellular level            |                  |                 |         |                    |         |                   |          |      |
| GO:0022411                                 |          | 5.26033126274226e-12                                        | 16.3956536164565 |                 |         |                    |         | 1.15590616566328  |          |      |
| 14                                         | 288      | cellular component disassembly                              |                  |                 |         |                    |         |                   |          |      |
| GO:0019058                                 |          | 5.30225772852097e-12                                        | 18.7844036697248 |                 |         |                    |         | 0.927133070375753 |          |      |
| 13                                         | 231      | viral infectious cycle                                      |                  |                 |         |                    |         |                   |          |      |
| GO:0022415                                 |          | 2.35598091127924e-11                                        | 16.5450292397661 |                 |         |                    |         | 1.04352639955712  |          |      |
| 13                                         | 260      | viral reproductive process                                  |                  |                 |         |                    |         |                   |          |      |
| GO:0016032                                 |          | 1.96566610969025e-09                                        | 10.1614312460994 |                 |         |                    |         | 1.81011694692409  |          |      |
| 14                                         | 451      | viral reproduction                                          |                  |                 |         |                    |         |                   |          |      |
| GO:0033365                                 |          | 3.45228616168807e-08                                        | 8.75019323671498 |                 |         |                    |         | 1.89841533457892  |          |      |
| 13                                         | 473      | protein localization to organelle                           |                  |                 |         |                    |         |                   |          |      |
| GO:0006605                                 |          | 3.53913412529147e-08                                        | 8.73058568329718 |                 |         |                    |         | 1.90242889765414  |          |      |
| 13                                         | 474      | protein targeting                                           |                  |                 |         |                    |         |                   |          |      |
| GO:0006120                                 |          | 2.993531095236e-07                                          | 43.7066342057212 |                 |         |                    |         | 0.144488270707909 |          |      |
| 5                                          | 36       | mitochondrial electron transport, NADH to ubiquinone        |                  |                 |         |                    |         |                   |          |      |
| GO:0042773                                 |          | 1.17773404871539e-06                                        | 32.2349505840072 |                 |         |                    |         | 0.188637464535326 |          |      |
| 5                                          | 47       | ATP synthesis coupled electron transport                    |                  |                 |         |                    |         |                   |          |      |
| GO:0042775                                 |          | 1.17773404871539e-06                                        | 32.2349505840072 |                 |         |                    |         | 0.188637464535326 |          |      |
| 5                                          | 47       | mitochondrial ATP synthesis coupled electron transport      |                  |                 |         |                    |         |                   |          |      |
| GO:0022904                                 |          | 2.24867507836758e-06                                        | 18.3371794871795 |                 |         |                    |         | 0.385302055221092 |          |      |
| 6                                          | 96       | respiratory electron transport chain                        |                  |                 |         |                    |         |                   |          |      |
| GO:0006119                                 |          | 3.40171389065233e-06                                        | 25.5250978996084 |                 |         |                    |         | 0.232786658362743 |          |      |
| 5                                          | 58       | oxidative phosphorylation                                   |                  |                 |         |                    |         |                   |          |      |
| GO:0022900                                 |          | 1.54832871168784e-05                                        | 12.8590745192308 |                 |         |                    |         | 0.537817452079441 |          |      |
| 6                                          | 134      | electron transport chain                                    |                  |                 |         |                    |         |                   |          |      |
| Tissue: Nerve_Tibial=>Heart_Left_Ventricle |          | Type: asymmetric                                            |                  |                 |         |                    |         |                   |          |      |
| SourceGene: ZNF681(ENSG00000196172.8)      |          |                                                             |                  |                 |         |                    |         |                   |          |      |
| TargetGeneSet:                             |          | KLHL17                                                      | ZBTB48           | HNRNPR          | RPL11   | RP4                | RP1     | CCDC23            | TAL1     | JUN  |
| COG2                                       | TFB2M    | PFN4                                                        | EMILIN1          | LBX2            | COX5B   | RPL31              | RPL37A  | GMPPA             | GORASP1  | RP11 |
| KBTBD5                                     | SCAP     | TNNC1                                                       | OSBPL11          | ACPL2           | EIF2B5  | MB21D2             | RPL35A  | ATP5I             | ALPK1    |      |
| BBS12                                      | NDUFS6   | RPL37                                                       | ANKRD32          | PGGT1B          | BRD8    | RPS14              | TMEM14B | CCND3             | UBR2     |      |
| RPL39P3                                    | MICAL1   | MRPS12                                                      | TCF21            | FNDC1           | AGPAT4  | SGCE               | CLDN15  | ATP6V1F           | TNPO3    | PTN  |
| C8orf59                                    | RPL30    | COX6C                                                       | AZIN1            | EEF1D           | RPL8    | LINC00475          |         | CDK5RAP2          |          |      |
| ITIH2                                      | RPLP2    | TAF10                                                       | RPL27A           | CTD             | VEGFB   | MEN1               | FAU     | ALDH3B2           | C11orf65 |      |
| RPS25                                      | PKNOX2   | C12orf23                                                    |                  | RPS2P5          | ADPRHL1 | AP1G2              | RPS29   | ZFYVE26           | SLIRP    |      |
| NDUFB1                                     | PPP1R13B |                                                             | FAN1             | ATPBD4          | PLDN    | RPS3AP6            | RPLP1   | RBL2              | CDK10    |      |
| RPL23A                                     | LRRC37B  | RPL19                                                       | RPL27            | NMT1            | TRIM37  | RPL38              | ALYREF  | CABYR             | TRAPPC8  |      |
| RPS15                                      | RPL36    | DNM2                                                        | JUND             | ATP13A1         | USF2    | POLR2I             | COX7A1  | TMEM91            | GLTSCR2  |      |
| KCNJ14                                     | ZNF137P  | SAMHD1                                                      | NCOA3            | NRIP1           | CHCHD10 | PNPLA4             | GAGE10  | COX7B             | KIAA1210 |      |
| MTM1                                       |          |                                                             |                  |                 |         |                    |         |                   |          |      |
| GOBPID                                     | Pvalue   | OddsRatio                                                   | ExpCount         | Count           | Size    | Term               |         |                   |          |      |
| GO:0006414                                 |          | 1.51549713154803e-25                                        | 45.7307692307692 |                 |         | 0.719327382188084  |         |                   |          |      |
| 21                                         | 105      | translational elongation                                    |                  |                 |         |                    |         |                   |          |      |
| GO:0006415                                 |          | 3.01870293711272e-25                                        | 50.9217329292209 |                 |         | 0.623417064563006  |         |                   |          |      |
| 20                                         | 91       | translational termination                                   |                  |                 |         |                    |         |                   |          |      |
| GO:0019080                                 |          | 4.77951986072147e-25                                        | 33.6299342105263 |                 |         | 1.0344612829562 23 |         |                   |          |      |
| 151                                        |          | viral genome expression                                     |                  |                 |         |                    |         |                   |          |      |
| GO:0019083                                 |          | 4.77951986072147e-25                                        | 33.6299342105263 |                 |         | 1.0344612829562 23 |         |                   |          |      |
| 151                                        |          | viral transcription                                         |                  |                 |         |                    |         |                   |          |      |
| GO:0006614                                 |          | 6.77286508437162e-24                                        | 42.4929262844378 |                 |         | 0.719327382188084  |         |                   |          |      |
| 20                                         | 105      | SRP-dependent cotranslational protein targeting to membrane |                  |                 |         |                    |         |                   |          |      |
| GO:0006613                                 |          | 8.30422633248145e-24                                        | 41.9958787165146 |                 |         | 0.726178119161304  |         |                   |          |      |
| 20                                         | 106      | cotranslational protein targeting to membrane               |                  |                 |         |                    |         |                   |          |      |
| GO:0045047                                 |          | 8.30422633248145e-24                                        | 41.9958787165146 |                 |         | 0.726178119161304  |         |                   |          |      |
| 20                                         | 106      | protein targeting to ER                                     |                  |                 |         |                    |         |                   |          |      |

Stable4\_20PerPair

|                                                          |                                                     |                                                                     |                   |            |         |                   |          |          |         |      |
|----------------------------------------------------------|-----------------------------------------------------|---------------------------------------------------------------------|-------------------|------------|---------|-------------------|----------|----------|---------|------|
| GO:0072599                                               | 8.30422633248145e-24                                | 41.9958787165146                                                    | 0.726178119161304 |            |         |                   |          |          |         |      |
| 20                                                       | 106                                                 | establishment of protein localization to endoplasmic reticulum      |                   |            |         |                   |          |          |         |      |
| GO:0070972                                               | 8.18896918089433e-23                                | 36.822526478946                                                     | 0.808386962839942 | 20         |         |                   |          |          |         |      |
| 118                                                      | protein                                             | localization to endoplasmic reticulum                               |                   |            |         |                   |          |          |         |      |
| GO:0000184                                               | 9.79171447939428e-23                                | 36.4480245492904                                                    | 0.815237699813162 |            |         |                   |          |          |         |      |
| 20                                                       | 119                                                 | nuclear-transcribed mRNA catabolic process, nonsense-mediated decay |                   |            |         |                   |          |          |         |      |
| GO:0006413                                               | 5.62966617062338e-22                                | 29.2269524368761                                                    | 1.04131201992942  |            |         |                   |          |          |         |      |
| 21                                                       | 152                                                 | translational initiation                                            |                   |            |         |                   |          |          |         |      |
| GO:0043624                                               | 6.49138132258503e-22                                | 29.0034965034965                                                    | 1.04816275690264  |            |         |                   |          |          |         |      |
| 21                                                       | 153                                                 | cellular protein complex disassembly                                |                   |            |         |                   |          |          |         |      |
| GO:0043241                                               | 1.30317942730842e-21                                | 27.935148792813                                                     | 1.08241644176874  | 21         |         |                   |          |          |         |      |
| 158                                                      | protein                                             | complex disassembly                                                 |                   |            |         |                   |          |          |         |      |
| GO:0022415                                               | 8.33452138219346e-21                                | 19.1403389830508                                                    | 1.78119161303716  |            |         |                   |          |          |         |      |
| 24                                                       | 260                                                 | viral reproductive process                                          |                   |            |         |                   |          |          |         |      |
| GO:0034623                                               | 1.03851872134011e-20                                | 24.9856711915535                                                    | 1.19202823334025  |            |         |                   |          |          |         |      |
| 21                                                       | 174                                                 | cellular macromolecular complex disassembly                         |                   |            |         |                   |          |          |         |      |
| GO:0019058                                               | 1.05514302782179e-20                                | 20.5789473684211                                                    | 1.58252024081378  |            |         |                   |          |          |         |      |
| 23                                                       | 231                                                 | viral infectious cycle                                              |                   |            |         |                   |          |          |         |      |
| GO:0006612                                               | 1.84924729330284e-20                                | 27.0657656800228                                                    | 1.04816275690264  |            |         |                   |          |          |         |      |
| 20                                                       | 153                                                 | protein targeting to membrane                                       |                   |            |         |                   |          |          |         |      |
| GO:0032984                                               | 1.90259994217449e-20                                | 24.1864654333009                                                    | 1.22628191820635  |            |         |                   |          |          |         |      |
| 21                                                       | 179                                                 | macromolecular complex disassembly                                  |                   |            |         |                   |          |          |         |      |
| GO:0000956                                               | 1.41224709153608e-19                                | 24.1321892787359                                                    | 1.15777454847415  |            |         |                   |          |          |         |      |
| 20                                                       | 169                                                 | nuclear-transcribed mRNA catabolic process                          |                   |            |         |                   |          |          |         |      |
| GO:0006402                                               | 4.04282799305268e-19                                | 22.7431501361961                                                    | 1.21943118123313  |            |         |                   |          |          |         |      |
| 20                                                       | 178                                                 | mRNA catabolic process                                              |                   |            |         |                   |          |          |         |      |
| GO:0072594                                               | 6.23418712364457e-18                                | 19.493670886076                                                     | 1.39755034253685  | 20         |         |                   |          |          |         |      |
| 204                                                      | establishment of protein localization to organelle  |                                                                     |                   |            |         |                   |          |          |         |      |
| GO:0006401                                               | 6.87177814556804e-18                                | 19.3869312350325                                                    | 1.40440107951007  |            |         |                   |          |          |         |      |
| 20                                                       | 205                                                 | RNA catabolic process                                               |                   |            |         |                   |          |          |         |      |
| GO:0016032                                               | 2.20165744349223e-17                                | 11.6712973408541                                                    | 3.08968237492215  |            |         |                   |          |          |         |      |
| 26                                                       | 451                                                 | viral reproduction                                                  |                   |            |         |                   |          |          |         |      |
| GO:0071845                                               | 2.82792175904935e-16                                | 14.4227844398947                                                    | 1.94560930039444  |            |         |                   |          |          |         |      |
| 21                                                       | 284                                                 | cellular component disassembly at cellular level                    |                   |            |         |                   |          |          |         |      |
| GO:0022411                                               | 3.75483763168943e-16                                | 14.2026793431288                                                    | 1.97301224828732  |            |         |                   |          |          |         |      |
| 21                                                       | 288                                                 | cellular component disassembly                                      |                   |            |         |                   |          |          |         |      |
| GO:0033365                                               | 7.29247973035502e-13                                | 8.80646183085207                                                    | 3.24039858833299  |            |         |                   |          |          |         |      |
| 22                                                       | 473                                                 | protein localization to organelle                                   |                   |            |         |                   |          |          |         |      |
| GO:0006605                                               | 7.60738743476219e-13                                | 8.78634639696587                                                    | 3.24724932530621  |            |         |                   |          |          |         |      |
| 22                                                       | 474                                                 | protein targeting                                                   |                   |            |         |                   |          |          |         |      |
| Tissue: Skin_Sun_Exposed_Lower_leg=>Heart_Left_Ventricle |                                                     |                                                                     | Type:             | asymmetric |         |                   |          |          |         |      |
| SourceGene: 7SK(ENSG00000201600.1)                       |                                                     |                                                                     |                   |            |         |                   |          |          |         |      |
| TargetGeneSet:                                           | WASH7P                                              | ATPAF1                                                              | SCP2              | ACADM      | GCLM    | ACTG1P4           | ATP5F1   | KDM5B    | RP11    |      |
| TOMM20                                                   | FH                                                  | CNST                                                                | MDH1              | C1D        | NFU1    | SUCLG1            | SNRNP200 | ATP5G3   | PASK    |      |
| VPRBP                                                    | CHMP2B                                              | NDUFB4                                                              | RNF7              | PIK3CA     | HTT     | ISOC1             | SKP1     | TMEM14C  | TMEM14B | AIG1 |
| BRP44L                                                   | GBAS                                                | JHDM1D                                                              | AGK               | C7orf34    | VDAC3   | MSC               | ATAD2    | FAM49B   | NDUFB6  |      |
| FAM108B1                                                 |                                                     | HSDL2                                                               | NUP214            | PHYH       | RAB18   | NDUFB8            | PRDM11   | TMEM126B | PTS     |      |
| SLC25A3                                                  | C12orf23                                            |                                                                     | ARL6IP4           | FKBP3      | PLEKHH1 | ZFYVE26           | PPP1R13B | DUT      |         |      |
| COX5A                                                    | ETFA                                                | UQCRC2                                                              | RNF40             | RBL2       | ANKFY1  | TNRC6C            | CTD      | NDUFV2   | VAPA    |      |
| CDH20                                                    | NDUFS7                                              | NDUFA13                                                             | UQCRC1            | RPL13A     | CRLS1   | C20orf94          |          | TTLL9    | ZHX3    |      |
| TNRC6B                                                   | TCF20                                               | FAM19A5                                                             | CDK16             |            |         |                   |          |          |         |      |
| GOBPID                                                   | Pvalue                                              | OddsRatio                                                           | ExpCount          | Count      | Size    | Term              |          |          |         |      |
| GO:0045333                                               | 2.04011661884743e-15                                | 29.9876802884615                                                    |                   |            |         | 0.648536433464812 |          |          |         |      |
| 14                                                       | 142                                                 | cellular respiration                                                |                   |            |         |                   |          |          |         |      |
| GO:0022904                                               | 4.90972084106769e-13                                | 33.6470588235294                                                    |                   |            |         | 0.43844716628607  |          |          |         |      |
| 11                                                       | 96                                                  | respiratory electron transport chain                                |                   |            |         |                   |          |          |         |      |
| GO:0006091                                               | 5.02898241236289e-12                                | 11.7959183673469                                                    |                   |            |         | 1.95474361635873  |          |          |         |      |
| 17                                                       | 428                                                 | generation of precursor metabolites and energy                      |                   |            |         |                   |          |          |         |      |
| GO:0015980                                               | 5.82989536677808e-12                                | 14.1952054794521                                                    |                   |            |         | 1.402117500519    | 15       |          |         |      |
| 307                                                      | energy derivation by oxidation of organic compounds |                                                                     |                   |            |         |                   |          |          |         |      |
| GO:0022900                                               | 2.00256500788561e-11                                | 23.190243902439                                                     | 0.61199916960764  |            |         |                   |          | 11       |         |      |
| 134                                                      | electron transport chain                            |                                                                     |                   |            |         |                   |          |          |         |      |
| GO:0006119                                               | 7.48133722625455e-09                                | 33.345962113659                                                     | 0.264895162964501 |            |         |                   |          | 7        |         |      |

STable4\_20PerPair

|                                                          |                                                      |                                                                |                   |                   |                   |                   |          |                  |          |
|----------------------------------------------------------|------------------------------------------------------|----------------------------------------------------------------|-------------------|-------------------|-------------------|-------------------|----------|------------------|----------|
| 58                                                       | oxidative phosphorylation                            |                                                                |                   |                   |                   |                   |          |                  |          |
| GO:0006120                                               | 5.75552198565753e-07                                 | 37.95346377578                                                 | 0.164417687357276 |                   |                   |                   |          |                  | 5        |
| 36                                                       | mitochondrial electron transport, NADH to ubiquinone |                                                                |                   |                   |                   |                   |          |                  |          |
| GO:0042773                                               | 2.25292599187876e-06                                 | 27.9918032786885                                               |                   | 0.214656425160889 |                   |                   |          |                  |          |
| 5                                                        | 47                                                   | ATP synthesis coupled electron transport                       |                   |                   |                   |                   |          |                  |          |
| GO:0042775                                               | 2.25292599187876e-06                                 | 27.9918032786885                                               |                   | 0.214656425160889 |                   |                   |          |                  |          |
| 5                                                        | 47                                                   | mitochondrial ATP synthesis coupled electron transport         |                   |                   |                   |                   |          |                  |          |
| Tissue: Skin_Sun_Exposed_Lower_leg=>Heart_Left_Ventricle |                                                      |                                                                |                   |                   |                   |                   |          | Type: cluster    |          |
| SourceGene:                                              | 7SK(ENSG00000201600.1)                               |                                                                |                   |                   |                   |                   |          |                  |          |
| TargetGeneSet:                                           | WASH7P                                               | ATPAF1                                                         | SCP2              | ACADM             | GCLM              | ACTG1P4           | ATP5F1   | KDM5B            | RP11     |
| TOMM20                                                   | FH                                                   | CNST                                                           | MDH1              | C1D               | NFU1              | SUCLG1            | SNRNP200 | ATP5G3           | PASK     |
| VPRBP                                                    | CHMP2B                                               | NDUFB4                                                         | RNF7              | PIK3CA            | HTT               | ISOC1             | SKP1     | TMEM14C          | TMEM14B  |
| BRP44L                                                   | GBAS                                                 | JHDM1D                                                         | AGK               | C7orf34           | VDAC3             | MSC               | ATAD2    | FAM49B           | NDUFB6   |
| FAM108B1                                                 |                                                      | HSDL2                                                          | NUP214            | PHYH              | RAB18             | NDUFB8            | PRDM11   | TMEM126B         | PTS      |
| SLC25A3                                                  | C12orf23                                             |                                                                | ARL6IP4           | FKBP3             | PLEKHH1           | ZFYVE26           | PPP1R13B |                  | DUT      |
| COX5A                                                    | ETFA                                                 | UQCRC2                                                         | RNF40             | RBL2              | ANKFY1            | TNRC6C            | CTD      | NDUFV2           | VAPA     |
| CDH20                                                    | NDUFS7                                               | NDUFA13                                                        | UQCRFS1           | RPL13A            | CRLS1             | C20orf94          | TTLL9    | ZHX3             |          |
| TNRC6B                                                   | TCF20                                                | FAM19A5                                                        | CDK16             |                   |                   |                   |          |                  |          |
| GOBPID                                                   | Pvalue                                               | OddsRatio                                                      | ExpCount          | Count             | Size              | Term              |          |                  |          |
| GO:0045333                                               | 14                                                   | 2.04011661884743e-15                                           | 29.9876802884615  |                   |                   | 0.648536433464812 |          |                  |          |
|                                                          | 142                                                  | cellular respiration                                           |                   |                   |                   |                   |          |                  |          |
| GO:0022904                                               | 11                                                   | 4.90972084106769e-13                                           | 33.6470588235294  |                   |                   | 0.43844716628607  |          |                  |          |
|                                                          | 96                                                   | respiratory electron transport chain                           |                   |                   |                   |                   |          |                  |          |
| GO:0006091                                               | 17                                                   | 5.02898241236289e-12                                           | 11.7959183673469  |                   |                   | 1.95474361635873  |          |                  |          |
|                                                          | 428                                                  | generation of precursor metabolites and energy                 |                   |                   |                   |                   |          |                  |          |
| GO:0015980                                               | 307                                                  | 5.82989536677808e-12                                           | 14.1952054794521  |                   |                   | 1.402117500519    |          |                  | 15       |
|                                                          |                                                      | energy derivation by oxidation of organic compounds            |                   |                   |                   |                   |          |                  |          |
| GO:0022900                                               | 134                                                  | 2.00256500788561e-11                                           | 23.190243902439   | 0.61199916960764  |                   |                   |          |                  | 11       |
|                                                          |                                                      | electron transport chain                                       |                   |                   |                   |                   |          |                  |          |
| GO:0006119                                               | 58                                                   | 7.48133722625455e-09                                           | 33.345962113659   | 0.264895162964501 |                   |                   |          |                  | 7        |
|                                                          |                                                      | oxidative phosphorylation                                      |                   |                   |                   |                   |          |                  |          |
| GO:0006120                                               | 36                                                   | 5.75552198565753e-07                                           | 37.95346377578    | 0.164417687357276 |                   |                   |          |                  | 5        |
|                                                          |                                                      | mitochondrial electron transport, NADH to ubiquinone           |                   |                   |                   |                   |          |                  |          |
| GO:0042773                                               | 5                                                    | 2.25292599187876e-06                                           | 27.9918032786885  |                   | 0.214656425160889 |                   |          |                  |          |
|                                                          | 47                                                   | ATP synthesis coupled electron transport                       |                   |                   |                   |                   |          |                  |          |
| GO:0042775                                               | 5                                                    | 2.25292599187876e-06                                           | 27.9918032786885  |                   | 0.214656425160889 |                   |          |                  |          |
|                                                          | 47                                                   | mitochondrial ATP synthesis coupled electron transport         |                   |                   |                   |                   |          |                  |          |
| Tissue: Heart_Left_Ventricle=>Skin_Sun_Exposed_Lower_leg |                                                      |                                                                |                   |                   |                   |                   |          | Type: asymmetric |          |
| SourceGene:                                              | C1DP1(ENSG00000231245.2)                             |                                                                |                   |                   |                   |                   |          |                  |          |
| TargetGeneSet:                                           | RPL11                                                | RPS8                                                           | RP11              | RPL5              | MAEL              | FAM89A            | RPS7     | UBC              |          |
| RPL31                                                    | GLS                                                  | EEF1B2                                                         | C3orf19           | RPL24             | CSTA              | CNBP              | RPL34    | RPL37            | RIOK2    |
| RPL26L1                                                  | CDC40                                                | BUD31                                                          | NSMCE2            | ZDHHC21           | RPS6              | ZNF658            | C9orf78  | ADK              | RPS24    |
| CCDC90B                                                  | RPS25                                                | SETD8                                                          | SFSWAP            | ARF4P4            | EAPP              | COX16             | RPS27L   | LRRK1            | MAP1LC3B |
| RPS4XP17                                                 |                                                      | LINC00324                                                      |                   | RPL26             | TMEM11            | RPL19             | SMARCE1  | BECN1            | RPL27    |
| RPS7P11                                                  | CEP112                                               | ICT1                                                           | NFKBIB            | MED29             | ZNF230            | PIH1D1            | ZNF350   | SNRPB2           | ZNRF3    |
| PHF5A                                                    |                                                      |                                                                |                   |                   |                   |                   |          |                  |          |
| GOBPID                                                   | Pvalue                                               | OddsRatio                                                      | ExpCount          | Count             | Size              | Term              |          |                  |          |
| GO:0006415                                               | 17                                                   | 1.87027438692148e-26                                           | 109.734234234234  |                   |                   | 0.295965677115771 |          |                  |          |
|                                                          | 91                                                   | translational termination                                      |                   |                   |                   |                   |          |                  |          |
| GO:0006414                                               | 17                                                   | 2.5951120880528e-25                                            | 92.1863636363636  |                   |                   | 0.341498858210504 |          |                  |          |
|                                                          | 105                                                  | translational elongation                                       |                   |                   |                   |                   |          |                  |          |
| GO:0006614                                               | 16                                                   | 2.29167751868088e-23                                           | 83.0155853570134  |                   |                   | 0.341498858210504 |          |                  |          |
|                                                          | 105                                                  | SRP-dependent cotranslational protein targeting to membrane    |                   |                   |                   |                   |          |                  |          |
| GO:0006613                                               | 106                                                  | 2.69360292890147e-23                                           | 82.0874551971326  |                   |                   | 0.3447512282887   |          |                  | 16       |
|                                                          |                                                      | cotranslational protein targeting to membrane                  |                   |                   |                   |                   |          |                  |          |
| GO:0045047                                               | 106                                                  | 2.69360292890147e-23                                           | 82.0874551971326  |                   |                   | 0.3447512282887   |          |                  | 16       |
|                                                          |                                                      | protein targeting to ER                                        |                   |                   |                   |                   |          |                  |          |
| GO:0072599                                               | 106                                                  | 2.69360292890147e-23                                           | 82.0874551971326  |                   |                   | 0.3447512282887   |          |                  | 16       |
|                                                          |                                                      | establishment of protein localization to endoplasmic reticulum |                   |                   |                   |                   |          |                  |          |
| GO:0034623                                               | 18                                                   | 3.89985821497553e-23                                           | 56.6896551724138  |                   |                   | 0.565912393605979 |          |                  |          |
|                                                          | 174                                                  | cellular macromolecular complex disassembly                    |                   |                   |                   |                   |          |                  |          |
| GO:0032984                                               | 18                                                   | 6.60341824934804e-23                                           | 54.9098307988863  |                   |                   | 0.582174243996955 |          |                  |          |
|                                                          | 179                                                  | macromolecular complex disassembly                             |                   |                   |                   |                   |          |                  |          |

Stable4\_20PerPair

|                                                          |                                                  |                                                                     |                    |
|----------------------------------------------------------|--------------------------------------------------|---------------------------------------------------------------------|--------------------|
| GO:0070972                                               | 1.66002805142341e-22                             | 72.3693864642631                                                    | 0.383779669227043  |
| 16                                                       | 118                                              | protein localization to endoplasmic reticulum                       |                    |
| GO:0000184                                               | 1.91399679581293e-22                             | 71.6617601002192                                                    | 0.387032039305238  |
| 16                                                       | 119                                              | nuclear-transcribed mRNA catabolic process, nonsense-mediated decay |                    |
| GO:0043624                                               | 2.21961866314831e-22                             | 59.45 0.497612621963878                                             | 17 153             |
| cellular protein complex disassembly                     |                                                  |                                                                     |                    |
| GO:0043241                                               | 3.91334845523995e-22                             | 57.3217494089835                                                    | 0.513874472354854  |
| 17                                                       | 158                                              | protein complex disassembly                                         |                    |
| GO:0019080                                               | 1.02145400016613e-20                             | 54.5529271206691                                                    | 0.491107881807487  |
| 16                                                       | 151                                              | viral genome expression                                             |                    |
| GO:0019083                                               | 1.02145400016613e-20                             | 54.5529271206691                                                    | 0.491107881807487  |
| 16                                                       | 151                                              | viral transcription                                                 |                    |
| GO:0006413                                               | 1.13929928685966e-20                             | 54.1480075901328                                                    | 0.494360251885683  |
| 16                                                       | 152                                              | translational initiation                                            |                    |
| GO:0006612                                               | 1.26976388250673e-20                             | 53.748999293619 0.497612621963878                                   | 16                 |
| 153                                                      | protein targeting to membrane                    |                                                                     |                    |
| GO:0000956                                               | 6.53363370348099e-20                             | 48.0742146320894                                                    | 0.549650543215002  |
| 16                                                       | 169                                              | nuclear-transcribed mRNA catabolic process                          |                    |
| GO:0006402                                               | 1.52860245164895e-19                             | 45.3747510951812                                                    | 0.57892187391876   |
| 16                                                       | 178                                              | mRNA catabolic process                                              |                    |
| GO:0071845                                               | 3.05587798645251e-19                             | 32.9898885143894                                                    | 0.92367310220746   |
| 18                                                       | 284                                              | cellular component disassembly at cellular level                    |                    |
| GO:0022411                                               | 3.93092665671937e-19                             | 32.4919540229885                                                    | 0.936682582520241  |
| 18                                                       | 288                                              | cellular component disassembly                                      |                    |
| GO:0072594                                               | 1.40621880723957e-18                             | 39.0281400137268                                                    | 0.663483495951837  |
| 16                                                       | 204                                              | establishment of protein localization to organelle                  |                    |
| GO:0006401                                               | 1.52214678734768e-18                             | 38.8189110769756                                                    | 0.666735866030033  |
| 16                                                       | 205                                              | RNA catabolic process                                               |                    |
| GO:0019058                                               | 1.04501178139908e-17                             | 34.0621155288822                                                    | 0.75129748806311   |
| 16                                                       | 231                                              | viral infectious cycle                                              |                    |
| GO:0022415                                               | 6.93995669532707e-17                             | 29.9524061343205                                                    | 0.845616220330773  |
| 16                                                       | 260                                              | viral reproductive process                                          |                    |
| GO:0033365                                               | 4.73789041113529e-14                             | 17.3330409356725                                                    | 1.53837104698637   |
| 17                                                       | 473                                              | protein localization to organelle                                   |                    |
| GO:0006605                                               | 4.90422245348897e-14                             | 17.2938730853392                                                    | 1.54162341706456   |
| 17                                                       | 474                                              | protein targeting                                                   |                    |
| GO:0016032                                               | 3.84640051771802e-13                             | 16.5742677048572                                                    | 1.46681890526607   |
| 16                                                       | 451                                              | viral reproduction                                                  |                    |
| GO:0022613                                               | 1.08689794804515e-10                             | 20.2609034267913                                                    | 0.731783267593938  |
| 11                                                       | 225                                              | ribonucleoprotein complex biogenesis                                |                    |
| GO:0071843                                               | 2.07450223779525e-10                             | 18.9980506822612                                                    | 0.777316448688672  |
| 11                                                       | 239                                              | cellular component biogenesis at cellular level                     |                    |
| GO:0042274                                               | 2.42652791495935e-09                             | 131.785714285714                                                    | 0.0585426614075151 |
| 5                                                        | 18                                               | ribosomal small subunit biogenesis                                  |                    |
| GO:0042254                                               | 2.36707126530468e-08                             | 20.7499545371886                                                    | 0.484603141651097  |
| 8                                                        | 149                                              | ribosome biogenesis                                                 |                    |
| GO:0006364                                               | 4.0483575735676e-08                              | 25.8115979381443                                                    | 0.338246488132309  |
| 7                                                        | 104                                              | rRNA processing                                                     |                    |
| GO:0016072                                               | 5.97647474353613e-08                             | 24.2978155339806                                                    | 0.357760708601481  |
| 7                                                        | 110                                              | rRNA metabolic process                                              |                    |
| GO:0034660                                               | 3.34660909614529e-06                             | 10.4615384615385                                                    | 0.926925472285655  |
| 8                                                        | 285                                              | ncRNA metabolic process                                             |                    |
| GO:0034470                                               | 3.44565047883556e-06                             | 12.885621761658 0.650474015639056                                   | 7                  |
| 200                                                      | ncRNA processing                                 |                                                                     |                    |
| GO:0042273                                               | 6.94949201671952e-06                             | 109.05303030303 0.0390284409383434                                  | 3                  |
| 12                                                       | ribosomal large subunit biogenesis               |                                                                     |                    |
| GO:0022618                                               | 1.36149834757131e-05                             | 18.9338624338624                                                    | 0.308975157428552  |
| 5                                                        | 95                                               | ribonucleoprotein complex assembly                                  |                    |
| GO:0071826                                               | 1.74781816011287e-05                             | 17.9310776942356                                                    | 0.325237007819528  |
| 5                                                        | 100                                              | ribonucleoprotein complex subunit organization                      |                    |
| Tissue: Heart_Left_Ventricle=>Skin_Sun_Exposed_Lower_leg |                                                  |                                                                     | Type: asymmetric   |
| SourceGene:                                              | ENSG00000214754.3                                |                                                                     |                    |
| TargetGeneSet:                                           | RP4 KCNAB2 CDCA8 IQGAP3 NCAPH CKAP2L SPC25 POC1A |                                                                     |                    |

Stable4\_20PerPair

| NCAPG      | RP11     | NUDT6                                 | NEIL3                                   | CCNB1                | NR2F2             | CDC25C | HMMR  | USP49              | PMS2P9 |
|------------|----------|---------------------------------------|-----------------------------------------|----------------------|-------------------|--------|-------|--------------------|--------|
| IMMP2L-IT1 |          | BAAT                                  | ZWINT                                   | KIF11                | MKI67             | MPP2   | E2F7  | DLGAP5             | PAPOLA |
| BUB1B      | C15orf42 |                                       | PRC1                                    | PKMYT1               | SNX29P2           | FAM64A | SPAG5 | TOP2A              | KIF18B |
| PALM3      | UBE2C    | CA5BP1                                | HTATSF1                                 |                      |                   |        |       |                    |        |
| GOBPID     | Pvalue   | OddsRatio                             | ExpCount                                | Count                | Size              | Term   |       |                    |        |
| GO:0000280 | 350      | nuclear division                      | 5.86836681853956e-15                    | 32.599537037037      | 0.775032869697599 |        |       |                    | 14     |
| GO:0007067 | 350      | mitosis                               | 5.86836681853956e-15                    | 32.599537037037      | 0.775032869697599 |        |       |                    | 14     |
| GO:0000087 | 14       | 360                                   | M phase of mitotic cell cycle           | 8.66675876103026e-15 | 31.6348747591522  |        |       | 0.797176665974673  |        |
| GO:0048285 | 14       | 370                                   | organelle fission                       | 1.2656791333764e-14  | 30.7244069912609  |        |       | 0.819320462251747  |        |
| GO:0051301 | 14       | 452                                   | cell division                           | 1.98055752977858e-13 | 24.8267376966007  |        |       | 1.00089959172376   |        |
| GO:0007051 | 8        | 80                                    | spindle organization                    | 5.82160862710856e-12 | 66.4212962962963  |        |       | 0.177150370216594  |        |
| GO:0000819 | 7        | 52                                    | sister chromatid segregation            | 1.61299677968602e-11 | 89.4382222222222  |        |       | 0.115147740640786  |        |
| GO:0007059 | 8        | 140                                   | chromosome segregation                  | 5.48522525331172e-10 | 36.0782828282828  |        |       | 0.310013147879039  |        |
| GO:0000070 | 6        | 49                                    | mitotic sister chromatid segregation    | 9.38407128529748e-10 | 77.1520572450805  |        |       | 0.108504601757664  |        |
| GO:0007017 | 10       | 393                                   | microtubule-based process               | 7.46425377494542e-09 | 16.6579634464752  |        |       | 0.870251193689018  |        |
| GO:0010564 | 10       | 414                                   | regulation of cell cycle process        | 1.22667010602256e-08 | 15.7684518451845  |        |       | 0.916753165870874  |        |
| GO:0007346 | 9        | 303                                   | regulation of mitotic cell cycle        | 1.2775245293167e-08  | 18.7999112688554  |        |       | 0.67095702719535   |        |
| GO:0071156 | 264      | regulation of cell cycle arrest       | 8.02928498929883e-08                    | 18.44140625          | 0.58459622171476  |        |       |                    | 8      |
| GO:0000226 | 8        | 269                                   | microtubule cytoskeleton organization   | 9.27877212936575e-08 | 18.0817369093231  |        |       | 0.595668119853297  |        |
| GO:0030261 | 4        | 30                                    | chromosome condensation                 | 5.21110494056672e-07 | 79.0824175824176  |        |       | 0.0664313888312228 |        |
| GO:0007093 | 6        | 139                                   | mitotic cell cycle checkpoint           | 5.24238690105645e-07 | 24.7877385772123  |        |       | 0.307798768251332  |        |
| GO:0000086 | 144      | G2/M transition of mitotic cell cycle | 6.45536442742863e-07                    | 23.88127090301       | 0.318870666389869 |        |       |                    | 6      |
| GO:0007052 | 4        | 33                                    | mitotic spindle organization            | 7.74487414122206e-07 | 70.8866995073892  |        |       | 0.073074527714345  |        |
| GO:0000075 | 242      | cell cycle checkpoint                 | 7.97570394176808e-07                    | 16.900085106383      | 0.535879869905197 |        |       |                    | 7      |
| GO:0007050 | 8        | 369                                   | cell cycle arrest                       | 1.030563893515e-06   | 12.9806094182825  |        |       | 0.81710608262404   |        |
| GO:0000236 | 5        | 85                                    | mitotic prometaphase                    | 1.11098295158155e-06 | 33.1921296296296  |        |       | 0.188222268355131  |        |
| GO:0007088 | 5        | 88                                    | regulation of mitosis                   | 1.32068018549993e-06 | 31.9857206604195  |        |       | 0.194865407238253  |        |
| GO:0051783 | 5        | 88                                    | regulation of nuclear division          | 1.32068018549993e-06 | 31.9857206604195  |        |       | 0.194865407238253  |        |
| GO:0045786 | 8        | 437                                   | negative regulation of cell cycle       | 3.64344177840547e-06 | 10.8702408702409  |        |       | 0.967683897308145  |        |
| GO:0048015 | 5        | 126                                   | phosphatidylinositol-mediated signaling | 7.75901084799842e-06 | 21.8824609733701  |        |       | 0.279011833091136  |        |
| GO:0048017 | 5        | 126                                   | inositol lipid-mediated signaling       | 7.75901084799842e-06 | 21.8824609733701  |        |       | 0.279011833091136  |        |
| GO:0051329 | 7        | 379                                   | interphase of mitotic cell cycle        | 1.54238193478613e-05 | 10.5730107526882  |        |       | 0.839249878901114  |        |
| GO:0051325 | 7        | 387                                   | interphase                              | 1.76546950891511e-05 | 10.3445263157895  |        |       | 0.856964915922773  |        |

Tissue: Skin\_Sun\_Exposed\_Lower\_leg=>Heart\_Left\_Ventricle  
 SourceGene: ENSG00000214897.3

Type: cluster



Stable4\_20PerPair

| TargetGeneSet:                                         | SLC35E2              | CAPZB                                                               | ASAP3            | GNAI3             | RP11    | PMF1              | PTRHD1  | FAM161A  |      |
|--------------------------------------------------------|----------------------|---------------------------------------------------------------------|------------------|-------------------|---------|-------------------|---------|----------|------|
| RABL2A MYL3                                            | RHOA                 | MAP3K13                                                             | FGF12            | NOP14             | FAM184B | SLAIN2            | ENPEP   | NDUFC1   | CTD  |
| ISOC1 PCDHB9                                           | DHX16                | IBTK                                                                | UBE2J1           | TRIM73            | ANKIB1  | ECD               | ATP5J2  | UQCRB    |      |
| COX6C NOL8                                             | CAMSAP1              | DLG5                                                                | EIF5AL1          | RPL13AP5          |         | NDUFB8            | RPLP2   | C11orf10 |      |
| PRDX5 FAU                                              | EFEMP2               | RPS25                                                               | AVIL             | C12orf51          |         | TESC              | ARL6IP4 | RFC3     |      |
| DHRS12 PSME2                                           | LGALS3               | NDUFB1                                                              | SRP14            | ZFP106            | POLR2M  | PSMA4             | NDUFB10 | HCFC1R1  |      |
| TMEM219 RANBP10                                        | CLEC18B              | PSMB6                                                               | KIAA0753         |                   | LRRC48  | RPL27             | EFTUD2  | RPL38    |      |
| C17orf89                                               | SIRT7                | IER3IP1                                                             | PIN1             | GADD45GIP1        |         | C19orf53          |         | TPM4     | COMP |
| ZNF461 SEPW1                                           | KCNJ14               | RPS11                                                               | NDUFA3           | ZNF471            | RPS21   | URB1              | PI4KA   | NDUFB11  |      |
| HUWE1 TAF1                                             | UPRT                 | COX7B                                                               | CXorf57          | NUP62CL           | NDUFA1  |                   |         |          |      |
| GOBPID                                                 | Pvalue               | OddsRatio                                                           | ExpCount         | Count             | Size    | Term              |         |          |      |
| GO:0022904                                             | 1.33732100616129e-12 |                                                                     | 30.3247830279653 |                   |         | 0.478305999584804 |         |          |      |
| 11                                                     | 96                   | respiratory electron transport chain                                |                  |                   |         |                   |         |          |      |
| GO:0022900                                             | 5.37588670989758e-11 |                                                                     | 20.9004398240704 |                   |         | 0.667635457753789 |         |          |      |
| 11                                                     | 134                  | electron transport chain                                            |                  |                   |         |                   |         |          |      |
| GO:0045333                                             | 1.01044201491657e-10 |                                                                     | 19.613064697785  | 0.707494291052522 |         |                   |         | 11       |      |
| 142                                                    |                      | cellular respiration                                                |                  |                   |         |                   |         |          |      |
| GO:0006414                                             | 2.31969129398839e-09 |                                                                     | 21.2544642857143 |                   |         | 0.523147187045879 |         |          |      |
| 9                                                      | 105                  | translational elongation                                            |                  |                   |         |                   |         |          |      |
| GO:0042773                                             | 3.03436326636512e-09 |                                                                     | 38.605           | 0.23417064563006  |         |                   | 7       | 47       |      |
| ATP synthesis coupled electron transport               |                      |                                                                     |                  |                   |         |                   |         |          |      |
| GO:0042775                                             | 3.03436326636512e-09 |                                                                     | 38.605           | 0.23417064563006  |         |                   | 7       | 47       |      |
| mitochondrial ATP synthesis coupled electron transport |                      |                                                                     |                  |                   |         |                   |         |          |      |
| GO:0043624                                             | 4.02512454765841e-09 |                                                                     | 16.056846379427  | 0.762300186838281 |         |                   |         | 10       |      |
| 153                                                    |                      | cellular protein complex disassembly                                |                  |                   |         |                   |         |          |      |
| GO:0043241                                             | 5.49696234036314e-09 |                                                                     | 15.5089363557105 |                   |         | 0.78721195764999  |         |          |      |
| 10                                                     | 158                  | protein complex disassembly                                         |                  |                   |         |                   |         |          |      |
| GO:0006119                                             | 1.38907487019764e-08 |                                                                     | 30.2552036199095 |                   |         | 0.288976541415819 |         |          |      |
| 7                                                      | 58                   | oxidative phosphorylation                                           |                  |                   |         |                   |         |          |      |
| GO:0034623                                             | 1.39179631874333e-08 |                                                                     | 13.9801337529504 |                   |         | 0.866929624247457 |         |          |      |
| 10                                                     | 174                  | cellular macromolecular complex disassembly                         |                  |                   |         |                   |         |          |      |
| GO:0006415                                             | 1.55689248791091e-08 |                                                                     | 21.5301204819277 |                   |         | 0.453394228773095 |         |          |      |
| 8                                                      | 91                   | translational termination                                           |                  |                   |         |                   |         |          |      |
| GO:0032984                                             | 1.82530494398229e-08 |                                                                     | 13.561748425272  | 0.891841395059165 |         |                   |         | 10       |      |
| 179                                                    |                      | macromolecular complex disassembly                                  |                  |                   |         |                   |         |          |      |
| GO:0006120                                             | 2.14101005549352e-08 |                                                                     | 43.4818181818182 |                   |         | 0.179364749844301 |         |          |      |
| 6                                                      | 36                   | mitochondrial electron transport, NADH to ubiquinone                |                  |                   |         |                   |         |          |      |
| GO:0006614                                             | 4.83291413978044e-08 |                                                                     | 18.4046391752577 |                   |         | 0.523147187045879 |         |          |      |
| 8                                                      | 105                  | SRP-dependent cotranslational protein targeting to membrane         |                  |                   |         |                   |         |          |      |
| GO:0006613                                             | 5.20682592711374e-08 |                                                                     | 18.2155612244898 |                   |         | 0.528129541208221 |         |          |      |
| 8                                                      | 106                  | cotranslational protein targeting to membrane                       |                  |                   |         |                   |         |          |      |
| GO:0045047                                             | 5.20682592711374e-08 |                                                                     | 18.2155612244898 |                   |         | 0.528129541208221 |         |          |      |
| 8                                                      | 106                  | protein targeting to ER                                             |                  |                   |         |                   |         |          |      |
| GO:0072599                                             | 5.20682592711374e-08 |                                                                     | 18.2155612244898 |                   |         | 0.528129541208221 |         |          |      |
| 8                                                      | 106                  | establishment of protein localization to endoplasmic reticulum      |                  |                   |         |                   |         |          |      |
| GO:0006612                                             | 6.3634435923876e-08  |                                                                     | 14.1220238095238 |                   |         | 0.762300186838281 |         |          |      |
| 9                                                      | 153                  | protein targeting to membrane                                       |                  |                   |         |                   |         |          |      |
| GO:0070972                                             | 1.20450250923153e-07 |                                                                     | 16.2147727272727 |                   |         | 0.587917791156321 |         |          |      |
| 8                                                      | 118                  | protein localization to endoplasmic reticulum                       |                  |                   |         |                   |         |          |      |
| GO:0015980                                             | 3.17379971457975e-07 |                                                                     | 8.57958573327426 |                   |         | 1.5295827278389   |         | 11       |      |
| 307                                                    |                      | energy derivation by oxidation of organic compounds                 |                  |                   |         |                   |         |          |      |
| GO:0071845                                             | 1.34311920586872e-06 |                                                                     | 8.3029197080292  | 1.41498858210504  |         |                   |         | 10       |      |
| 284                                                    |                      | cellular component disassembly at cellular level                    |                  |                   |         |                   |         |          |      |
| GO:0022411                                             | 1.52401164617413e-06 |                                                                     | 8.18113251334416 |                   |         | 1.43491799875441  |         |          |      |
| 10                                                     | 288                  | cellular component disassembly                                      |                  |                   |         |                   |         |          |      |
| GO:0000184                                             | 2.03452396418553e-06 |                                                                     | 13.7182692307692 |                   |         | 0.592900145318663 |         |          |      |
| 7                                                      | 119                  | nuclear-transcribed mRNA catabolic process, nonsense-mediated decay |                  |                   |         |                   |         |          |      |
| GO:0072594                                             | 7.58802498178715e-06 |                                                                     | 9.0452806122449  | 1.01640024911771  |         |                   |         | 8        |      |
| 204                                                    |                      | establishment of protein localization to organelle                  |                  |                   |         |                   |         |          |      |
| GO:0006091                                             | 8.03621405590083e-06 |                                                                     | 6.03774029956363 |                   |         | 2.13244758148225  |         |          |      |
| 11                                                     | 428                  | generation of precursor metabolites and energy                      |                  |                   |         |                   |         |          |      |
| GO:0019080                                             | 9.8734089327833e-06  |                                                                     | 10.6458333333333 |                   |         | 0.752335478513598 |         |          |      |
| 7                                                      | 151                  | viral genome expression                                             |                  |                   |         |                   |         |          |      |

Stable4\_20PerPair

|                                                          |                      |                                                                |                   |          |         |                                                                     |          |         |          |      |
|----------------------------------------------------------|----------------------|----------------------------------------------------------------|-------------------|----------|---------|---------------------------------------------------------------------|----------|---------|----------|------|
| GO:0019083                                               | 9.8734089327833e-06  | 10.6458333333333                                               | 0.752335478513598 |          |         |                                                                     |          |         |          |      |
| 7                                                        | 151                  | viral transcription                                            |                   |          |         |                                                                     |          |         |          |      |
| GO:0006413                                               | 1.0309333582479e-05  | 10.5716710875332                                               | 0.757317832675939 |          |         |                                                                     |          |         |          |      |
| 7                                                        | 152                  | translational initiation                                       |                   |          |         |                                                                     |          |         |          |      |
| GO:0016032                                               | 1.31432848272601e-05 | 5.71270491803279                                               | 2.24704172721611  |          |         |                                                                     |          |         |          |      |
| 11                                                       | 451                  | viral reproduction                                             |                   |          |         |                                                                     |          |         |          |      |
| Tissue: Heart_Left_Ventricle=>Skin_Sun_Exposed_Lower_leg |                      |                                                                | Type: cluster     |          |         |                                                                     |          |         |          |      |
| SourceGene:                                              | ENSG00000224505.1    |                                                                |                   |          |         |                                                                     |          |         |          |      |
| TargetGeneSet:                                           | RPL22                | RPL11                                                          | RP1               | TMEM222  | SNRNP40 | MFSD2A                                                              | ST7L     | RBM8A   | MCL1     |      |
| CHTOP                                                    | CLK2                 | DDX59                                                          | ARL8A             | ADCK3    | OXER1   | PPP3R1                                                              | RPIA     | IL1RL2  | CCDC115  |      |
| WDR75                                                    | FAM117B              | FAM134A                                                        | 7SK               | CIDECP   | SLC6A11 | RPL32                                                               | C3orf19  | ZNF501  | FAM212A  |      |
| C3orf14                                                  | RYBP                 | IFT57                                                          | QTRTD1            | RAB41    | MSL2    | YTHDC1                                                              | DCK      | RCHY1   | CDKN2AIP |      |
| RP11                                                     | CARD6                | ZNF131                                                         | RIOK2             | RPS14    | BOD1    | BTN2A1                                                              | SRPK1    | FRS3    | TJAP1    | RPF2 |
| PPIL4                                                    | LATS1                | AP5Z1                                                          | PMS2CL            | TRA2A    | RP9     | RALA                                                                | URGCP    | NUDCD3  | COBL     |      |
| CCT6P1                                                   | SBDSP1               | MTERF                                                          | PON1              | ZNF3     | EPO     | THAP5                                                               | ZC3HC1   | TMEM209 | TBXAS1   |      |
| SLC37A3                                                  | C7orf34              | ZNF212                                                         | NEIL2             | R3HCC1   | SGK3    | TERF1                                                               | RPL30    | EBAG9   | UTP23    | RPL8 |
| KLHL9                                                    | C9orf156             |                                                                | EPB41L4B          |          | ZFAND4  | SIRT1                                                               | SLC25A16 |         | SUPV3L1  |      |
| TYSND1                                                   | DNAJB12              | SMC3                                                           | RPLP2             | RRP8     | ARFGAP2 | FAM111B                                                             | MS4A7    | VPS37C  | ZBTB3    |      |
| TRMT112                                                  | FAU                  | C11orf68                                                       |                   | SF3B2    | PITPNM1 | ZNF259                                                              | RPS25    | VPS11   | NECAP1   |      |
| MIR614                                                   | RPL14P1              | PARBPB                                                         | C12orf73          |          | SART3   | RSRC2                                                               | USP12    | KBTBD7  | ARL11    | TTC5 |
| RBM23                                                    | NGDN                 | IFT43                                                          | NDNL2             | FAM82A2  | RPL4    | WHAMM                                                               | VPS33B   | TBC1D24 | ZNF205   |      |
| TFAP4                                                    | CCDC101              | HIRIP3                                                         | VPS4A             | GLOD4    | DVL2    | SNORA48                                                             | PLD6     | FLCN    | ZNF286B  |      |
| TLK2P1                                                   | ZNF830               | RPL19                                                          | MED1              | PGAP3    | SNX11   | FAM117A                                                             | SMG8     | RPS6KB1 | APPBP2   |      |
| SNORA76                                                  | NOL11                | KPNA2                                                          | SAP30BP           | L3MBTL4  | GREB1L  | SERPINB13                                                           |          | TMX3    | SAFB     | XAB2 |
| NR2C2AP                                                  | SUGP1                | TSSK6                                                          | ZNF430            | ZNF461   | ZNF569  | ZNF571                                                              | RPS16    | CCDC97  | ZNF574   |      |
| ZNF180                                                   | SNRPD2               | GLTSCR2                                                        | RPL18             | RPS11    | ZNF649  | ZNF766                                                              | CHMP2A   | ZCCHC3  | RSP04    |      |
| PSMF1                                                    | MRPS26               | FLRT3                                                          | DTD1              | CRNKL1   | PDRG1   | CDK5RAP1                                                            |          | PCIF1   | NCOA5    |      |
| ZFP64                                                    | LSM14B               | PRPF6                                                          | ICOSLG            | C22orf39 |         | SF3A1                                                               | LIMK2    | IL2RB   | RPL3     | TEF  |
| ARAF                                                     | TIMM17B              | GPKOW                                                          | DKC1              |          |         |                                                                     |          |         |          |      |
| GOBPID                                                   | Pvalue               | OddsRatio                                                      | ExpCount          | Count    | Size    | Term                                                                |          |         |          |      |
| GO:0000184                                               | 1.47353697992736e-14 | 16.537296037296                                                | 1.31755587848592  | 17       |         | nuclear-transcribed mRNA catabolic process, nonsense-mediated decay |          |         |          |      |
| 119                                                      | 91                   | translational termination                                      |                   |          |         |                                                                     |          |         |          |      |
| GO:0006415                                               | 6.29387212451571e-14 | 19.3489110707804                                               | 1.00754273060688  |          |         | translational elongation                                            |          |         |          |      |
| 15                                                       | 91                   | translational elongation                                       |                   |          |         |                                                                     |          |         |          |      |
| GO:0006414                                               | 5.59455896737114e-13 | 16.3229885057471                                               | 1.1625493045464   | 15       |         | SRP-dependent cotranslational protein targeting to membrane         |          |         |          |      |
| 105                                                      | 106                  | cotranslational protein targeting to membrane                  |                   |          |         |                                                                     |          |         |          |      |
| GO:0006613                                               | 6.45523066346816e-13 | 16.1424782114437                                               | 1.17362120268494  |          |         | protein targeting to ER                                             |          |         |          |      |
| 15                                                       | 106                  | protein targeting to ER                                        |                   |          |         |                                                                     |          |         |          |      |
| GO:0045047                                               | 6.45523066346816e-13 | 16.1424782114437                                               | 1.17362120268494  |          |         | establishment of protein localization to endoplasmic reticulum      |          |         |          |      |
| 15                                                       | 106                  | establishment of protein localization to endoplasmic reticulum |                   |          |         |                                                                     |          |         |          |      |
| GO:0072599                                               | 6.45523066346816e-13 | 16.1424782114437                                               | 1.17362120268494  |          |         | mRNA catabolic process                                              |          |         |          |      |
| 15                                                       | 106                  | mRNA catabolic process                                         |                   |          |         |                                                                     |          |         |          |      |
| GO:0006402                                               | 1.07553284885558e-12 | 11.1953345070423                                               | 1.97079786865961  |          |         | protein localization to endoplasmic reticulum                       |          |         |          |      |
| 18                                                       | 178                  | protein localization to endoplasmic reticulum                  |                   |          |         |                                                                     |          |         |          |      |
| GO:0070972                                               | 3.21418506412267e-12 | 14.2497489119518                                               | 1.30648398034738  |          |         | nuclear-transcribed mRNA catabolic process                          |          |         |          |      |
| 15                                                       | 118                  | nuclear-transcribed mRNA catabolic process                     |                   |          |         |                                                                     |          |         |          |      |
| GO:0000956                                               | 5.16016841499698e-12 | 11.0582903938167                                               | 1.87115078541277  |          |         | viral genome expression                                             |          |         |          |      |
| 17                                                       | 169                  | viral genome expression                                        |                   |          |         |                                                                     |          |         |          |      |
| GO:0019080                                               | 1.01293782346996e-11 | 11.6510288065844                                               | 1.67185661891911  |          |         | viral transcription                                                 |          |         |          |      |
| 16                                                       | 151                  | viral transcription                                            |                   |          |         |                                                                     |          |         |          |      |
| GO:0019083                                               | 1.01293782346996e-11 | 11.6510288065844                                               | 1.67185661891911  |          |         | translational initiation                                            |          |         |          |      |
| 16                                                       | 151                  | translational initiation                                       |                   |          |         |                                                                     |          |         |          |      |
| GO:0006413                                               | 1.12143467704931e-11 | 11.5645424836601                                               | 1.68292851705764  |          |         | RNA catabolic process                                               |          |         |          |      |
| 16                                                       | 152                  | RNA catabolic process                                          |                   |          |         |                                                                     |          |         |          |      |
| GO:0006401                                               | 1.195397214553e-11   | 9.56059350756948                                               | 2.26973911840011  |          |         | viral infectious cycle                                              |          |         |          |      |
| 18                                                       | 205                  | viral infectious cycle                                         |                   |          |         |                                                                     |          |         |          |      |
| GO:0019058                                               | 8.7700419798809e-11  | 8.37809958341599                                               | 2.55760847000208  |          |         | establishment of protein localization to organelle                  |          |         |          |      |
| 18                                                       | 231                  | establishment of protein localization to organelle             |                   |          |         |                                                                     |          |         |          |      |
| GO:0072594                                               | 1.05287618598566e-10 | 8.96630642085188                                               | 2.25866722026157  |          |         |                                                                     |          |         |          |      |
| 17                                                       | 204                  |                                                                |                   |          |         |                                                                     |          |         |          |      |
| GO:0006612                                               | 1.4136980983579e-10  | 10.6094452773613                                               | 1.69400041519618  |          |         |                                                                     |          |         |          |      |

STable4\_20PerPair

|                                                          |        |                                                                                      |                  |                   |         |                   |          |                  |        |
|----------------------------------------------------------|--------|--------------------------------------------------------------------------------------|------------------|-------------------|---------|-------------------|----------|------------------|--------|
| 15                                                       | 153    | protein targeting to membrane                                                        |                  |                   |         |                   |          |                  |        |
| GO:0043624                                               |        | 1.4136980983579e-10                                                                  | 10.6094452773613 |                   |         |                   |          | 1.69400041519618 |        |
| 15                                                       | 153    | cellular protein complex disassembly                                                 |                  |                   |         |                   |          |                  |        |
| GO:0043241                                               |        | 2.23505409197828e-10                                                                 | 10.2348685796962 |                   |         |                   |          | 1.74935990588887 |        |
| 15                                                       | 158    | protein complex disassembly                                                          |                  |                   |         |                   |          |                  |        |
| GO:0022415                                               |        | 6.05733383335712e-10                                                                 | 7.35892212780817 |                   |         |                   |          | 2.87869351601965 |        |
| 18                                                       | 260    | viral reproductive process                                                           |                  |                   |         |                   |          |                  |        |
| GO:0034623                                               |        | 8.70727292601652e-10                                                                 | 9.19453480806766 |                   |         |                   |          | 1.92651027610546 |        |
| 15                                                       | 174    | cellular macromolecular complex disassembly                                          |                  |                   |         |                   |          |                  |        |
| GO:0032984                                               |        | 1.29289078788587e-09                                                                 | 8.91105971404542 |                   |         |                   |          | 1.98186976679815 |        |
| 15                                                       | 179    | macromolecular complex disassembly                                                   |                  |                   |         |                   |          |                  |        |
| GO:0033365                                               |        | 2.7716193002126e-07                                                                  | 4.36392305266477 |                   |         |                   |          | 5.23700781952806 |        |
| 20                                                       | 473    | protein localization to organelle                                                    |                  |                   |         |                   |          |                  |        |
| GO:0000377                                               |        | 4.28867801478446e-07                                                                 | 6.52847526445133 |                   |         |                   |          | 2.25866722026157 |        |
| 13                                                       | 204    | RNA splicing, via transesterification reactions with bulged adenosine as nucleophile |                  |                   |         |                   |          |                  |        |
| GO:0000398                                               |        | 4.28867801478446e-07                                                                 | 6.52847526445133 |                   |         |                   |          | 2.25866722026157 |        |
| 13                                                       | 204    | nuclear mRNA splicing, via spliceosome                                               |                  |                   |         |                   |          |                  |        |
| GO:0000375                                               |        | 5.65602294868465e-07                                                                 | 6.35967652367069 |                   |         |                   |          | 2.31402671095426 |        |
| 13                                                       | 209    | RNA splicing, via transesterification reactions                                      |                  |                   |         |                   |          |                  |        |
| GO:0016032                                               |        | 5.95962511640301e-07                                                                 | 4.32297412660888 |                   |         |                   |          | 4.99342606048024 |        |
| 19                                                       | 451    | viral reproduction                                                                   |                  |                   |         |                   |          |                  |        |
| GO:0071845                                               |        | 6.07494944339125e-07                                                                 | 5.39238559159082 |                   |         |                   |          | 3.14441907134454 |        |
| 15                                                       | 284    | cellular component disassembly at cellular level                                     |                  |                   |         |                   |          |                  |        |
| GO:0022411                                               |        | 7.25158637153665e-07                                                                 | 5.31186055323986 |                   |         |                   |          | 3.18870666389869 |        |
| 15                                                       | 288    | cellular component disassembly                                                       |                  |                   |         |                   |          |                  |        |
| GO:0006605                                               |        | 1.25658739599681e-06                                                                 | 4.09763853168108 |                   |         |                   |          | 5.2480797176666  | 19     |
| 474                                                      |        | protein targeting                                                                    |                  |                   |         |                   |          |                  |        |
| GO:0022613                                               |        | 1.30272075961984e-06                                                                 | 5.87302656911821 |                   |         |                   |          | 2.49117708117085 |        |
| 13                                                       | 225    | ribonucleoprotein complex biogenesis                                                 |                  |                   |         |                   |          |                  |        |
| GO:0071843                                               |        | 2.55238701816115e-06                                                                 | 5.5037324664379  | 2.64618365511037  |         |                   |          |                  | 13     |
| 239                                                      |        | cellular component biogenesis at cellular level                                      |                  |                   |         |                   |          |                  |        |
| GO:0008380                                               |        | 3.02433911209088e-06                                                                 | 4.69648454993283 |                   |         |                   |          | 3.57622309874749 |        |
| 15                                                       | 323    | RNA splicing                                                                         |                  |                   |         |                   |          |                  |        |
| Tissue: Skin_Sun_Exposed_Lower_leg=>Heart_Left_Ventricle |        |                                                                                      |                  |                   |         |                   |          | Type: asymmetric |        |
| SourceGene:                                              |        | ENSG00000250699.1                                                                    |                  |                   |         |                   |          |                  |        |
| TargetGeneSet:                                           | RPL11  | Clorf212                                                                             | UBC              | R3HDM1            | RPL32   | RPL14             | ANTXR2   |                  |        |
| RPL15P3                                                  | RPS10  | WDR11                                                                                | CASP8AP2         | PNPLA8            | TAS2R5  | MLL3              | RPS20    | RP11             |        |
| DEPTOR                                                   | PRPF4  | UCK1                                                                                 | RPL27A           | RPS13             | MRGPRX2 | RPL14P1           | RPL18AP3 | HMGB3P4          |        |
| MAPK1IP1L                                                |        | FAN1                                                                                 | RPS3AP6          | RPL4              | RPS2    | CTA               | CLN3     | SPAG7            | RPL23A |
| RPL19                                                    | RPL27  | UBA52                                                                                | GLTSCR2          | RPS5              | RPS4X   |                   |          |                  |        |
| GOBPID                                                   | Pvalue | OddsRatio                                                                            | ExpCount         | Count             | Size    | Term              |          |                  |        |
| GO:0006415                                               |        | 4.24193765571411e-28                                                                 | 204.017777777778 |                   |         | 0.195211404055083 |          |                  |        |
| 16                                                       | 91     | translational termination                                                            |                  |                   |         |                   |          |                  |        |
| GO:0006414                                               |        | 5.02934023179459e-27                                                                 | 171.757303370787 |                   |         | 0.225243927755865 |          |                  |        |
| 16                                                       | 105    | translational elongation                                                             |                  |                   |         |                   |          |                  |        |
| GO:0006614                                               |        | 5.02934023179459e-27                                                                 | 171.757303370787 |                   |         | 0.225243927755865 |          |                  |        |
| 16                                                       | 105    | SRP-dependent cotranslational protein targeting to membrane                          |                  |                   |         |                   |          |                  |        |
| GO:0006613                                               |        | 5.91761980235816e-27                                                                 | 169.837037037037 |                   |         | 0.227389108020206 |          |                  |        |
| 16                                                       | 106    | cotranslational protein targeting to membrane                                        |                  |                   |         |                   |          |                  |        |
| GO:0045047                                               |        | 5.91761980235816e-27                                                                 | 169.837037037037 |                   |         | 0.227389108020206 |          |                  |        |
| 16                                                       | 106    | protein targeting to ER                                                              |                  |                   |         |                   |          |                  |        |
| GO:0072599                                               |        | 5.91761980235816e-27                                                                 | 169.837037037037 |                   |         | 0.227389108020206 |          |                  |        |
| 16                                                       | 106    | establishment of protein localization to endoplasmic reticulum                       |                  |                   |         |                   |          |                  |        |
| GO:0070972                                               |        | 3.69319741403028e-26                                                                 | 149.730718954248 |                   |         | 0.253131271192305 |          |                  |        |
| 16                                                       | 118    | protein localization to endoplasmic reticulum                                        |                  |                   |         |                   |          |                  |        |
| GO:0000184                                               |        | 4.26269833892774e-26                                                                 | 148.266666666667 |                   |         | 0.255276451456647 |          |                  |        |
| 16                                                       | 119    | nuclear-transcribed mRNA catabolic process, nonsense-mediated decay                  |                  |                   |         |                   |          |                  |        |
| GO:0019080                                               |        | 2.35275647218531e-24                                                                 | 112.869135802469 |                   |         | 0.323922219915577 |          |                  |        |
| 16                                                       | 151    | viral genome expression                                                              |                  |                   |         |                   |          |                  |        |
| GO:0019083                                               |        | 2.35275647218531e-24                                                                 | 112.869135802469 |                   |         | 0.323922219915577 |          |                  |        |
| 16                                                       | 151    | viral transcription                                                                  |                  |                   |         |                   |          |                  |        |
| GO:0006413                                               |        | 2.62695791137595e-24                                                                 | 112.03137254902  | 0.326067400179918 |         |                   |          |                  | 16     |

Stable4\_20PerPair

|                                                             |                                                  |                                                                     |                   |  |  |  |                    |    |
|-------------------------------------------------------------|--------------------------------------------------|---------------------------------------------------------------------|-------------------|--|--|--|--------------------|----|
| 152                                                         | translational initiation                         |                                                                     |                   |  |  |  |                    |    |
| GO:0006612                                                  | 2.93086226808131e-24                             | 111.205839416058                                                    |                   |  |  |  | 0.32821258044426   |    |
| 16                                                          | 153                                              | protein targeting to membrane                                       |                   |  |  |  |                    |    |
| GO:0043624                                                  | 2.93086226808131e-24                             | 111.205839416058                                                    |                   |  |  |  | 0.32821258044426   |    |
| 16                                                          | 153                                              | cellular protein complex disassembly                                |                   |  |  |  |                    |    |
| GO:0043241                                                  | 5.01021707818843e-24                             | 107.252582159624                                                    |                   |  |  |  | 0.338938481765968  |    |
| 16                                                          | 158                                              | protein complex disassembly                                         |                   |  |  |  |                    |    |
| GO:0000956                                                  | 1.53371637953331e-23                             | 99.4649237472767                                                    |                   |  |  |  | 0.362535464673725  |    |
| 16                                                          | 169                                              | nuclear-transcribed mRNA catabolic process                          |                   |  |  |  |                    |    |
| GO:0034623                                                  | 2.48676496348234e-23                             | 96.2835443037975                                                    |                   |  |  |  | 0.373261365995433  |    |
| 16                                                          | 174                                              | cellular macromolecular complex disassembly                         |                   |  |  |  |                    |    |
| GO:0006402                                                  | 3.62246278899431e-23                             | 93.8798353909465                                                    |                   |  |  |  | 0.381842087052799  |    |
| 16                                                          | 178                                              | mRNA catabolic process                                              |                   |  |  |  |                    |    |
| GO:0032984                                                  | 3.97411192101242e-23                             | 93.2973415132924                                                    |                   |  |  |  | 0.383987267317141  |    |
| 16                                                          | 179                                              | macromolecular complex disassembly                                  |                   |  |  |  |                    |    |
| GO:0072594                                                  | 3.42510091437734e-22                             | 80.7489361702128                                                    |                   |  |  |  | 0.43761677392568   |    |
| 16                                                          | 204                                              | establishment of protein localization to organelle                  |                   |  |  |  |                    |    |
| GO:0006401                                                  | 3.71138034536168e-22                             | 80.316049382716                                                     | 0.439761954190021 |  |  |  |                    | 16 |
| 205                                                         | RNA catabolic process                            |                                                                     |                   |  |  |  |                    |    |
| GO:0019058                                                  | 2.61896002440318e-21                             | 70.4744186046512                                                    |                   |  |  |  | 0.495536641062902  |    |
| 16                                                          | 231                                              | viral infectious cycle                                              |                   |  |  |  |                    |    |
| GO:0022415                                                  | 1.79345168034597e-20                             | 61.9715846994536                                                    |                   |  |  |  | 0.557746868728808  |    |
| 16                                                          | 260                                              | viral reproductive process                                          |                   |  |  |  |                    |    |
| GO:0071845                                                  | 7.48960941953688e-20                             | 56.326368159204                                                     | 0.609231195073005 |  |  |  |                    | 16 |
| 284                                                         | cellular component disassembly at cellular level |                                                                     |                   |  |  |  |                    |    |
| GO:0022411                                                  | 9.38775022166801e-20                             | 55.4823529411765                                                    |                   |  |  |  | 0.617811916130372  |    |
| 16                                                          | 288                                              | cellular component disassembly                                      |                   |  |  |  |                    |    |
| GO:0033365                                                  | 7.43915310463247e-18                             | 37.1848370927318                                                    |                   |  |  |  | 1.01467026503356   |    |
| 17                                                          | 473                                              | protein localization to organelle                                   |                   |  |  |  |                    |    |
| GO:0006605                                                  | 7.70860707812217e-18                             | 37.1008127539856                                                    |                   |  |  |  | 1.0168154452979    | 17 |
| 474                                                         | protein targeting                                |                                                                     |                   |  |  |  |                    |    |
| GO:0016032                                                  | 1.21809364465966e-16                             | 34.2927203065134                                                    |                   |  |  |  | 0.967476299218047  |    |
| 16                                                          | 451                                              | viral reproduction                                                  |                   |  |  |  |                    |    |
| Tissue: Skin_Sun_Exposed_Lower_leg=>Heart_Left_Ventricle    |                                                  |                                                                     | Type: asymmetric  |  |  |  |                    |    |
| SourceGene: ENSG00000258513.1                               |                                                  |                                                                     |                   |  |  |  |                    |    |
| TargetGeneSet: RP4 RPS7 RPL24 RP11 MECOM CTD RPL39P3 SNHG6  |                                                  |                                                                     |                   |  |  |  |                    |    |
| RPL35 RPLP2 RPL27A U6 TRAC RPS29 RPL7AP6 RPS7P1 RPS15 RPL36 |                                                  |                                                                     |                   |  |  |  |                    |    |
| GOBPID Pvalue OddsRatio ExpCount Count Size Term            |                                                  |                                                                     |                   |  |  |  |                    |    |
| GO:0006415                                                  | 8.75466515106586e-16                             | 345.927710843374                                                    |                   |  |  |  | 0.0755657047955159 |    |
| 8                                                           | 91                                               | translational termination                                           |                   |  |  |  |                    |    |
| GO:0006414                                                  | 2.86223155543203e-15                             | 295.711340206186                                                    |                   |  |  |  | 0.0871911978409799 |    |
| 8                                                           | 105                                              | translational elongation                                            |                   |  |  |  |                    |    |
| GO:0006614                                                  | 2.86223155543203e-15                             | 295.711340206186                                                    |                   |  |  |  | 0.0871911978409799 |    |
| 8                                                           | 105                                              | SRP-dependent cotranslational protein targeting to membrane         |                   |  |  |  |                    |    |
| GO:0006613                                                  | 3.09511656806613e-15                             | 292.673469387755                                                    |                   |  |  |  | 0.0880215902013702 |    |
| 8                                                           | 106                                              | cotranslational protein targeting to membrane                       |                   |  |  |  |                    |    |
| GO:0045047                                                  | 3.09511656806613e-15                             | 292.673469387755                                                    |                   |  |  |  | 0.0880215902013702 |    |
| 8                                                           | 106                                              | protein targeting to ER                                             |                   |  |  |  |                    |    |
| GO:0072599                                                  | 3.09511656806613e-15                             | 292.673469387755                                                    |                   |  |  |  | 0.0880215902013702 |    |
| 8                                                           | 106                                              | establishment of protein localization to endoplasmic reticulum      |                   |  |  |  |                    |    |
| GO:0070972                                                  | 7.48533940788438e-15                             | 260.527272727273                                                    |                   |  |  |  | 0.0979862985260536 |    |
| 8                                                           | 118                                              | protein localization to endoplasmic reticulum                       |                   |  |  |  |                    |    |
| GO:0000184                                                  | 8.02283483790861e-15                             | 258.162162162162                                                    |                   |  |  |  | 0.0988166908864438 |    |
| 8                                                           | 119                                              | nuclear-transcribed mRNA catabolic process, nonsense-mediated decay |                   |  |  |  |                    |    |
| GO:0019080                                                  | 5.63410912080144e-14                             | 199.944055944056                                                    |                   |  |  |  | 0.125389246418933  |    |
| 8                                                           | 151                                              | viral genome expression                                             |                   |  |  |  |                    |    |
| GO:0019083                                                  | 5.63410912080144e-14                             | 199.944055944056                                                    |                   |  |  |  | 0.125389246418933  |    |
| 8                                                           | 151                                              | viral transcription                                                 |                   |  |  |  |                    |    |
| GO:0006413                                                  | 5.94563862927435e-14                             | 198.541666666667                                                    |                   |  |  |  | 0.126219638779323  |    |
| 8                                                           | 152                                              | translational initiation                                            |                   |  |  |  |                    |    |
| GO:0006612                                                  | 6.27211613900626e-14                             | 197.158620689655                                                    |                   |  |  |  | 0.127050031139714  |    |
| 8                                                           | 153                                              | protein targeting to membrane                                       |                   |  |  |  |                    |    |
| GO:0043624                                                  | 6.27211613900626e-14                             | 197.158620689655                                                    |                   |  |  |  | 0.127050031139714  |    |

Stable4\_20PerPair

|                |                                                  |                                                                     |                      |                   |                   |                   |          |
|----------------|--------------------------------------------------|---------------------------------------------------------------------|----------------------|-------------------|-------------------|-------------------|----------|
| 8              | 153                                              | cellular protein complex disassembly                                | 8.15077837252388e-14 | 190.52            | 0.131201992941665 | 8                 | 158      |
| GO:0043241     |                                                  | protein complex disassembly                                         |                      |                   |                   |                   |          |
| GO:0000956     |                                                  | 1.40934469304936e-13                                                | 177.366459627329     |                   | 0.140336308905958 |                   |          |
| 8              | 169                                              | nuclear-transcribed mRNA catabolic process                          | 1.78610797332018e-13 | 171.963855421687  | 0.144488270707909 |                   |          |
| GO:0034623     |                                                  | cellular macromolecular complex disassembly                         | 2.14811893079371e-13 | 167.870588235294  | 0.147809840149471 |                   |          |
| GO:0006402     |                                                  | mRNA catabolic process                                              | 2.2480565338914e-13  | 166.877192982456  | 0.148640232509861 |                   |          |
| GO:0032984     |                                                  | macromolecular complex disassembly                                  | 6.48443399499177e-13 | 145.336734693878  | 0.169400041519618 |                   |          |
| GO:0072594     |                                                  | establishment of protein localization to organelle                  | 6.74608060895868e-13 | 144.58883248731   | 0.170230433880008 | 8                 |          |
| GO:0006401     | 205                                              | RNA catabolic process                                               | 1.76984701078215e-12 | 127.497757847534  | 0.191820635250156 |                   |          |
| GO:0019058     |                                                  | viral infectious cycle                                              | 4.58855624840892e-12 | 112.595238095238  | 0.215902013701474 |                   |          |
| GO:0022415     |                                                  | viral reproductive process                                          | 9.32944532399793e-12 | 102.630434782609  | 0.235831430350841 |                   |          |
| GO:0071845     |                                                  | cellular component disassembly at cellular level                    | 1.04380518630009e-11 | 101.135714285714  | 0.239152999792402 |                   |          |
| GO:0022411     |                                                  | cellular component disassembly                                      | 3.75459422710082e-10 | 63.1873589164786  | 0.374506954536018 |                   |          |
| GO:0016032     |                                                  | viral reproduction                                                  | 5.48138591881141e-10 | 60.1032258064516  | 0.392775586464605 |                   |          |
| GO:0033365     |                                                  | protein localization to organelle                                   | 5.57407557789227e-10 | 59.9699570815451  | 0.393605978824995 |                   |          |
| GO:0006605     |                                                  | protein targeting                                                   |                      |                   |                   |                   |          |
| 8              | 474                                              |                                                                     |                      |                   |                   |                   |          |
| Tissue:        | Heart_Left_Ventricle=>Skin_Sun_Exposed_Lower_leg |                                                                     |                      |                   | Type:             | asymmetric        |          |
| SourceGene:    | KCTD9P1(ENSG00000225014.1)                       |                                                                     |                      |                   |                   |                   |          |
| TargetGeneSet: | FAM132A                                          | CTNNBIP1                                                            | CROCC                | RPL11             | C1orf135          | SH3BGRL3          |          |
| PPP1R8         | YRDC                                             | RPS8                                                                | UQCRH                | TTC39A            | KTI12             | RP4               | RPL5     |
| DNNTIP2        | HIAT1                                            | RP11                                                                |                      |                   |                   |                   |          |
| HBXIP          | ATP5F1                                           | B3GALT2                                                             | TIMM17A              | TMEM183A          | TFB2M             | SH3YL1            | RPS7     |
| SPDYA          |                                                  |                                                                     |                      |                   |                   |                   |          |
| SNORA67        | UBC                                              | TPRKB                                                               | ANKRD36C             | RPL31             | GLI2              | DAPL1             | SEN2     |
| NBEAL1         |                                                  |                                                                     |                      |                   |                   |                   |          |
| EEF1B2         | MRPL44                                           | MYEOV2                                                              | RPL15                | CBX5P1            | ZNF90P1           | RPL24             | MRPL47   |
| SDHAP2         | RPL35A                                           | HOPX                                                                |                      |                   |                   |                   |          |
| FAM190A        | RPL34                                            | OSTC                                                                | RPS3A                | FBX08             | CDKN2AIP          | SLC38A9           | NDUF2AF2 |
| ADAMTS6        |                                                  |                                                                     |                      |                   |                   |                   |          |
| ZFYVE16        | CAMLG                                            | RPL26L1                                                             | TMEM14C              | TMEM14B           | TBC1              | RP13              | EEF1A1   |
| RP1            | TOMM7                                            | GBAS                                                                |                      |                   |                   |                   |          |
| MIR1255B1      |                                                  | RPS3AP26                                                            | HBP1                 | TRIM35            | EFCAB1            | RDH10             | TCEB1    |
| PAF1           |                                                  |                                                                     |                      |                   |                   |                   |          |
| POLR2K         | EIF3E                                            | TTC35                                                               | EIF3H                | RPS6              | LINC00032         | NDUFB6            | ZNF658   |
| KLF9           |                                                  |                                                                     |                      |                   |                   |                   |          |
| NCBP1          | ATP6V1G1                                         | ASB6                                                                | ANAPC16              | CHCHD1            | RPS24             | MARK2P9           | C10orf12 |
| U6             |                                                  |                                                                     |                      |                   |                   |                   |          |
| C11orf58       |                                                  | RPS13                                                               | EIF3M                | VWCE              | MALAT1            | PAK1              | CCDC90B  |
| RPS25          | U6                                               |                                                                     |                      |                   |                   |                   |          |
| TAS2R18        | PFDN5                                            | ANKS1B                                                              | PSMD9                | TPT1              | EBPL              | THSD1             | COMMD6   |
| CLYBL-AS2      | NGDN                                             |                                                                     |                      |                   |                   |                   |          |
| EAPP           | PSMA6                                            | KLHDC2                                                              | PSMA3                | MOAP1             | BAG5              | RSL24D1           | RPS3AP6  |
| RPS27L         | WDR61                                            |                                                                     |                      |                   |                   |                   |          |
| MORF4L1        | MRPL46                                           | SPSB3                                                               | RPS15A               | LYRM1             | TMED6             | MAP1LC3B          | RPL26    |
| ZNF286B        |                                                  |                                                                     |                      |                   |                   |                   |          |
| RPS7P1         | RPL17                                            | RPL19                                                               | RPL27                | HIGD1B            | CTD               | ICT1              | ZFP161   |
| WDR7           | PQLC1                                            |                                                                     |                      |                   |                   |                   |          |
| HSBP1L1        | CAPS                                             | WDR83                                                               | ZNF350               | ZNF460            | GCNT1P1           | PSMA7             | SNRPD3   |
| PHF5A          | EEF1B2P3                                         |                                                                     |                      |                   |                   |                   |          |
| COX7B          |                                                  |                                                                     |                      |                   |                   |                   |          |
| GOBPID         | Pvalue                                           | OddsRatio                                                           | ExpCount             | Count             | Size              | Term              |          |
| GO:0006414     |                                                  | 7.00108156243048e-28                                                | 46.5087918321044     |                   |                   | 0.791986713722234 |          |
| 23             | 105                                              | translational elongation                                            |                      |                   |                   |                   |          |
| GO:0006415     |                                                  | 9.9573812581339e-28                                                 | 52.3081792437115     |                   |                   | 0.686388485225936 |          |
| 22             | 91                                               | translational termination                                           |                      |                   |                   |                   |          |
| GO:0006413     |                                                  | 6.13779952928328e-27                                                | 33.3122422197225     |                   |                   | 1.14649505224552  |          |
| 25             | 152                                              | translational initiation                                            |                      |                   |                   |                   |          |
| GO:0000184     |                                                  | 1.59603668113705e-26                                                | 39.687257751938      | 0.897584942218532 |                   | 23                |          |
| 119            |                                                  | nuclear-transcribed mRNA catabolic process, nonsense-mediated decay |                      |                   |                   |                   |          |
| GO:0019080     |                                                  | 1.70098294364476e-25                                                | 31.6035201482168     |                   |                   | 1.13895232163864  |          |
| 24             | 151                                              | viral genome expression                                             |                      |                   |                   |                   |          |
| GO:0019083     |                                                  | 1.70098294364476e-25                                                | 31.6035201482168     |                   |                   | 1.13895232163864  |          |
| 24             | 151                                              | viral transcription                                                 |                      |                   |                   |                   |          |
| GO:0006614     |                                                  | 1.35355223956287e-24                                                | 40.5056818181818     |                   |                   | 0.791986713722234 |          |
| 21             | 105                                              | SRP-dependent cotranslational protein targeting to membrane         |                      |                   |                   |                   |          |

Stable4\_20PerPair

|                                                          |                                                                |                      |                    |
|----------------------------------------------------------|----------------------------------------------------------------|----------------------|--------------------|
| GO:0006613                                               | 1.67808866830512e-24                                           | 40.0263368983957     | 0.799529444329112  |
| 21 106                                                   | cotranslational protein targeting to membrane                  |                      |                    |
| GO:0045047                                               | 1.67808866830512e-24                                           | 40.0263368983957     | 0.799529444329112  |
| 21 106                                                   | protein targeting to ER                                        |                      |                    |
| GO:0072599                                               | 1.67808866830512e-24                                           | 40.0263368983957     | 0.799529444329112  |
| 21 106                                                   | establishment of protein localization to endoplasmic reticulum |                      |                    |
| GO:0072594                                               | 1.2479011519117e-23                                            | 23.5484836392658     | 1.5387170438032 25 |
| 204                                                      | establishment of protein localization to organelle             |                      |                    |
| GO:0019058                                               | 1.35404133555629e-23                                           | 21.6022333235381     | 1.74237077018891   |
| 26 231                                                   | viral infectious cycle                                         |                      |                    |
| GO:0070972                                               | 1.8718659352694e-23                                            | 35.0451030927835     | 0.890042211611653  |
| 21 118                                                   | protein localization to endoplasmic reticulum                  |                      |                    |
| GO:0000956                                               | 7.73126774786728e-23                                           | 26.0041414463205     | 1.27472147256245   |
| 23 169                                                   | nuclear-transcribed mRNA catabolic process                     |                      |                    |
| GO:0043624                                               | 2.61471104620423e-22                                           | 27.4319557778363     | 1.1540377828524 22 |
| 153                                                      | cellular protein complex disassembly                           |                      |                    |
| GO:0006402                                               | 2.63003009516724e-22                                           | 24.4786946736684     | 1.34260604802436   |
| 23 178                                                   | mRNA catabolic process                                         |                      |                    |
| GO:0022415                                               | 2.94732327295664e-22                                           | 18.8862115127175     | 1.96110995778839   |
| 26 260                                                   | viral reproductive process                                     |                      |                    |
| GO:0006401                                               | 3.26019612331964e-22                                           | 22.0906077348066     | 1.54625977441008   |
| 24 205                                                   | RNA catabolic process                                          |                      |                    |
| GO:0043241                                               | 4.32304443474305e-22                                           | 26.4141311697093     | 1.19175143588679   |
| 22 158                                                   | protein complex disassembly                                    |                      |                    |
| GO:0034623                                               | 3.80972730832128e-21                                           | 23.6070780399274     | 1.31243512559684   |
| 22 174                                                   | cellular macromolecular complex disassembly                    |                      |                    |
| GO:0006612                                               | 5.61471104620423e-21                                           | 25.6895661157025     | 1.1540377828524 21 |
| 153                                                      | protein targeting to membrane                                  |                      |                    |
| GO:0032984                                               | 7.18547446031269e-21                                           | 22.8472069697635     | 1.35014877863124   |
| 22 179                                                   | macromolecular complex disassembly                             |                      |                    |
| GO:0016032                                               | 1.63195272019299e-20                                           | 12.5569018912174     | 3.40177150370217   |
| 30 451                                                   | viral reproduction                                             |                      |                    |
| GO:0071845                                               | 1.16772050414388e-17                                           | 14.4285396061659     | 2.14213549235347   |
| 23 284                                                   | cellular component disassembly at cellular level               |                      |                    |
| GO:0022411                                               | 1.59447401062236e-17                                           | 14.2067134708205     | 2.17230641478098   |
| 23 288                                                   | cellular component disassembly                                 |                      |                    |
| GO:0033365                                               | 8.80019870315439e-15                                           | 9.23017644557823     | 3.56771157705349   |
| 25 473                                                   | protein localization to organelle                              |                      |                    |
| GO:0006605                                               | 9.23680250813398e-15                                           | 9.20895641107222     | 3.57525430766037   |
| 25 474                                                   | protein targeting                                              |                      |                    |
| GO:0022613                                               | 1.39770626050915e-08                                           | 9.02564858490566     | 1.69711438654764   |
| 13 225                                                   | ribonucleoprotein complex biogenesis                           |                      |                    |
| GO:0071843                                               | 2.8672468897145e-08                                            | 8.45814896755162     | 1.80271261504394   |
| 13 239                                                   | cellular component biogenesis at cellular level                |                      |                    |
| GO:0042274                                               | 1.76388272266686e-07                                           | 52.9918639053254     | 0.135769150923812  |
| 5 18                                                     | ribosomal small subunit biogenesis                             |                      |                    |
| GO:0042254                                               | 1.7878479343382e-07                                            | 10.3211975873846     | 1.12386686042488   |
| 10 149                                                   | ribosome biogenesis                                            |                      |                    |
| GO:0006364                                               | 1.14295904297322e-06                                           | 11.7541254125413     | 0.784443983115355  |
| 8 104                                                    | rRNA processing                                                |                      |                    |
| GO:0042273                                               | 1.44706157301348e-06                                           | 68.2571428571429     | 0.090512767282541  |
| 4 12                                                     | ribosomal large subunit biogenesis                             |                      |                    |
| GO:0016072                                               | 1.75139242922031e-06                                           | 11.0580469811687     | 0.829700366756626  |
| 8 110                                                    | rRNA metabolic process                                         |                      |                    |
| GO:0051352                                               | 1.67224777408421e-05                                           | 12.6001765225066     | 0.543076603695246  |
| 6 72                                                     | negative regulation of ligase activity                         |                      |                    |
| GO:0051444                                               | 1.67224777408421e-05                                           | 12.6001765225066     | 0.543076603695246  |
| 6 72                                                     | negative regulation of ubiquitin-protein ligase activity       |                      |                    |
| GO:0031571                                               | 1.81091961104918e-05                                           | 12.4112447471381     | 0.550619334302124  |
| 6 73                                                     | mitotic cell cycle G1/S transition DNA damage checkpoint       |                      |                    |
| Tissue: Heart_Left_Ventricle=>Skin_Sun_Exposed_Lower_leg |                                                                |                      | Type: cluster      |
| SourceGene:                                              | KCTD9P1(ENSG00000225014.1)                                     |                      |                    |
| TargetGeneSet:                                           | FAM132A CTNNBIP1                                               | CROCC RPL11 C1orf135 | SH3BGRL3           |

Stable4\_20PerPair

| GO:ID      | Pvalue               | OddsRatio                                                           | ExpCount         | Count             | Size | Term               |
|------------|----------------------|---------------------------------------------------------------------|------------------|-------------------|------|--------------------|
| GO:0006414 | 7.00108156243048e-28 |                                                                     | 46.5087918321044 |                   |      | 0.791986713722234  |
| 23         | 105                  | translational elongation                                            |                  |                   |      |                    |
| GO:0006415 | 9.9573812581339e-28  |                                                                     | 52.3081792437115 |                   |      | 0.686388485225936  |
| 22         | 91                   | translational termination                                           |                  |                   |      |                    |
| GO:0006413 | 6.13779952928328e-27 |                                                                     | 33.3122422197225 |                   |      | 1.14649505224552   |
| 25         | 152                  | translational initiation                                            |                  |                   |      |                    |
| GO:0000184 | 1.59603668113705e-26 |                                                                     | 39.687257751938  | 0.897584942218532 |      | 23                 |
| 119        |                      | nuclear-transcribed mRNA catabolic process, nonsense-mediated decay |                  |                   |      |                    |
| GO:0019080 | 1.70098294364476e-25 |                                                                     | 31.6035201482168 |                   |      | 1.13895232163864   |
| 24         | 151                  | viral genome expression                                             |                  |                   |      |                    |
| GO:0019083 | 1.70098294364476e-25 |                                                                     | 31.6035201482168 |                   |      | 1.13895232163864   |
| 24         | 151                  | viral transcription                                                 |                  |                   |      |                    |
| GO:0006614 | 1.35355223956287e-24 |                                                                     | 40.5056818181818 |                   |      | 0.791986713722234  |
| 21         | 105                  | SRP-dependent cotranslational protein targeting to membrane         |                  |                   |      |                    |
| GO:0006613 | 1.67808866830512e-24 |                                                                     | 40.0263368983957 |                   |      | 0.799529444329112  |
| 21         | 106                  | cotranslational protein targeting to membrane                       |                  |                   |      |                    |
| GO:0045047 | 1.67808866830512e-24 |                                                                     | 40.0263368983957 |                   |      | 0.799529444329112  |
| 21         | 106                  | protein targeting to ER                                             |                  |                   |      |                    |
| GO:0072599 | 1.67808866830512e-24 |                                                                     | 40.0263368983957 |                   |      | 0.799529444329112  |
| 21         | 106                  | establishment of protein localization to endoplasmic reticulum      |                  |                   |      |                    |
| GO:0072594 | 1.2479011519117e-23  |                                                                     | 23.5484836392658 |                   |      | 1.5387170438032 25 |
| 204        |                      | establishment of protein localization to organelle                  |                  |                   |      |                    |
| GO:0019058 | 1.35404133555629e-23 |                                                                     | 21.6022333235381 |                   |      | 1.74237077018891   |
| 26         | 231                  | viral infectious cycle                                              |                  |                   |      |                    |
| GO:0070972 | 1.8718659352694e-23  |                                                                     | 35.0451030927835 |                   |      | 0.890042211611653  |
| 21         | 118                  | protein localization to endoplasmic reticulum                       |                  |                   |      |                    |
| GO:0000956 | 7.73126774786728e-23 |                                                                     | 26.0041414463205 |                   |      | 1.27472147256245   |
| 23         | 169                  | nuclear-transcribed mRNA catabolic process                          |                  |                   |      |                    |
| GO:0043624 | 2.08118992313669e-22 |                                                                     | 27.4319557778363 |                   |      | 1.1540377828524 22 |
| 153        |                      | cellular protein complex disassembly                                |                  |                   |      |                    |
| GO:0006402 | 2.63003009516724e-22 |                                                                     | 24.4786946736684 |                   |      | 1.34260604802436   |
| 23         | 178                  | mRNA catabolic process                                              |                  |                   |      |                    |
| GO:0022415 | 2.94732327295664e-22 |                                                                     | 18.8862115127175 |                   |      | 1.96110995778839   |
| 26         | 260                  | viral reproductive process                                          |                  |                   |      |                    |
| GO:0006401 | 3.26019612331964e-22 |                                                                     | 22.0906077348066 |                   |      | 1.54625977441008   |
| 24         | 205                  | RNA catabolic process                                               |                  |                   |      |                    |
| GO:0043241 | 4.32304443474305e-22 |                                                                     | 26.4141311697093 |                   |      | 1.19175143588679   |
| 22         | 158                  | protein complex disassembly                                         |                  |                   |      |                    |
| GO:0034623 | 3.80972730832128e-21 |                                                                     | 23.6070780399274 |                   |      | 1.31243512559684   |
| 22         | 174                  | cellular macromolecular complex disassembly                         |                  |                   |      |                    |
| GO:0006612 | 5.61471104620423e-21 |                                                                     | 25.6895661157025 |                   |      | 1.1540377828524 21 |
| 153        |                      | protein targeting to membrane                                       |                  |                   |      |                    |
| GO:0032984 | 7.18547446031269e-21 |                                                                     | 22.8472069697635 |                   |      | 1.35014877863124   |
| 22         | 179                  | macromolecular complex disassembly                                  |                  |                   |      |                    |
| GO:0016032 | 1.63195272019299e-20 |                                                                     | 12.5569018912174 |                   |      | 3.40177150370217   |
| 30         | 451                  | viral reproduction                                                  |                  |                   |      |                    |

Stable4\_20PerPair

|                                                          |                           |                                                                     |                   |
|----------------------------------------------------------|---------------------------|---------------------------------------------------------------------|-------------------|
| GO:0071845                                               | 1.16772050414388e-17      | 14.4285396061659                                                    | 2.14213549235347  |
| 23                                                       | 284                       | cellular component disassembly at cellular level                    |                   |
| GO:0022411                                               | 1.59447401062236e-17      | 14.2067134708205                                                    | 2.17230641478098  |
| 23                                                       | 288                       | cellular component disassembly                                      |                   |
| GO:0033365                                               | 8.80019870315439e-15      | 9.23017644557823                                                    | 3.56771157705349  |
| 25                                                       | 473                       | protein localization to organelle                                   |                   |
| GO:0006605                                               | 9.23680250813398e-15      | 9.20895641107222                                                    | 3.57525430766037  |
| 25                                                       | 474                       | protein targeting                                                   |                   |
| GO:0022613                                               | 1.39770626050915e-08      | 9.02564858490566                                                    | 1.69711438654764  |
| 13                                                       | 225                       | ribonucleoprotein complex biogenesis                                |                   |
| GO:0071843                                               | 2.8672468897145e-08       | 8.45814896755162                                                    | 1.80271261504394  |
| 13                                                       | 239                       | cellular component biogenesis at cellular level                     |                   |
| GO:0042274                                               | 1.76388272266686e-07      | 52.9918639053254                                                    | 0.135769150923812 |
| 5                                                        | 18                        | ribosomal small subunit biogenesis                                  |                   |
| GO:0042254                                               | 1.7878479343382e-07       | 10.3211975873846                                                    | 1.12386686042488  |
| 10                                                       | 149                       | ribosome biogenesis                                                 |                   |
| GO:0006364                                               | 1.14295904297322e-06      | 11.7541254125413                                                    | 0.784443983115355 |
| 8                                                        | 104                       | rRNA processing                                                     |                   |
| GO:0042273                                               | 1.44706157301348e-06      | 68.2571428571429                                                    | 0.090512767282541 |
| 4                                                        | 12                        | ribosomal large subunit biogenesis                                  |                   |
| GO:0016072                                               | 1.75139242922031e-06      | 11.0580469811687                                                    | 0.829700366756626 |
| 8                                                        | 110                       | rRNA metabolic process                                              |                   |
| GO:0051352                                               | 1.67224777408421e-05      | 12.6001765225066                                                    | 0.543076603695246 |
| 6                                                        | 72                        | negative regulation of ligase activity                              |                   |
| GO:0051444                                               | 1.67224777408421e-05      | 12.6001765225066                                                    | 0.543076603695246 |
| 6                                                        | 72                        | negative regulation of ubiquitin-protein ligase activity            |                   |
| GO:0031571                                               | 1.81091961104918e-05      | 12.4112447471381                                                    | 0.550619334302124 |
| 6                                                        | 73                        | mitotic cell cycle G1/S transition DNA damage checkpoint            |                   |
| Tissue: Heart_Left_Ventricle=>Skin_Sun_Exposed_Lower_leg |                           |                                                                     | Type: asymmetric  |
| SourceGene:                                              | MYADM(ENSG00000179820.10) |                                                                     |                   |
| TargetGeneSet:                                           | PRPF38A                   | PFDN2                                                               | TFB2M             |
| EEF1B2 MYEOV2                                            | RP11                      | LARS2                                                               | CCDC72            |
| HIST1H2BL                                                | EEF1A1                    | LYRM2                                                               | RP1               |
| C9orf123                                                 | RPS6                      | CHMP5                                                               | YME1L1            |
| MTMR6 MOAP1                                              | RPS3AP6                   | FAM96B                                                              | ZNHIT3            |
| GOBPID Pvalue                                            | OddsRatio                 | ExpCount                                                            | Count             |
| GO:0006414                                               | 5.44827067695416e-12      | 46.2834051724138                                                    | 0.27610545982977  |
| 9                                                        | 105                       | translational elongation                                            |                   |
| GO:0006614                                               | 2.42015652695186e-10      | 39.3567010309278                                                    | 0.27610545982977  |
| 8                                                        | 105                       | SRP-dependent cotranslational protein targeting to membrane         |                   |
| GO:0006613                                               | 2.61286891729163e-10      | 38.9523809523809                                                    | 0.278735035637672 |
| 8                                                        | 106                       | cotranslational protein targeting to membrane                       |                   |
| GO:0045047                                               | 2.61286891729163e-10      | 38.9523809523809                                                    | 0.278735035637672 |
| 8                                                        | 106                       | protein targeting to ER                                             |                   |
| GO:0072599                                               | 2.61286891729163e-10      | 38.9523809523809                                                    | 0.278735035637672 |
| 8                                                        | 106                       | establishment of protein localization to endoplasmic reticulum      |                   |
| GO:0070972                                               | 6.19830965847345e-10      | 34.6739393939394                                                    | 0.310289945332503 |
| 8                                                        | 118                       | protein localization to endoplasmic reticulum                       |                   |
| GO:0072594                                               | 2.13459292520077e-09      | 22.6281167108753                                                    | 0.536433464812124 |
| 9                                                        | 204                       | establishment of protein localization to organelle                  |                   |
| GO:0006415                                               | 3.3446054642188e-09       | 38.5188172043011                                                    | 0.239291398519134 |
| 7                                                        | 91                        | translational termination                                           |                   |
| GO:0006612                                               | 4.90927691750099e-09      | 26.24                                                               | 0.402325098609093 |
| protein targeting to membrane                            |                           |                                                                     | 8                 |
| GO:0000184                                               | 2.19572843448776e-08      | 28.8326612903226                                                    | 0.312919521140405 |
| 7                                                        | 119                       | nuclear-transcribed mRNA catabolic process, nonsense-mediated decay |                   |
| GO:0019080                                               | 1.13802818805091e-07      | 22.3752240143369                                                    | 0.397065946993288 |
| 7                                                        | 151                       | viral genome expression                                             |                   |
| GO:0019083                                               | 1.13802818805091e-07      | 22.3752240143369                                                    | 0.397065946993288 |
| 7                                                        | 151                       | viral transcription                                                 |                   |
| GO:0006413                                               | 1.1907172276201e-07       | 22.2193548387097                                                    | 0.39969552280119  |
| 7                                                        | 152                       | translational initiation                                            |                   |
| GO:0043624                                               | 1.24545264686063e-07      | 22.0656208572691                                                    | 0.402325098609093 |



Stable4\_20PerPair

|                                                          |           |                                                                     |                  |                   |        |        |          |                    |         |
|----------------------------------------------------------|-----------|---------------------------------------------------------------------|------------------|-------------------|--------|--------|----------|--------------------|---------|
| 7                                                        | 153       | cellular protein complex disassembly                                |                  |                   |        |        |          |                    |         |
| GO:0043241                                               |           | 1.55212654087642e-07                                                | 21.3274941251869 |                   |        |        |          | 0.415472977648606  |         |
| 7                                                        | 158       | protein complex disassembly                                         |                  |                   |        |        |          |                    |         |
| GO:0000956                                               |           | 2.45680923715139e-07                                                | 19.8639984070092 |                   |        |        |          | 0.444398311535534  |         |
| 7                                                        | 169       | nuclear-transcribed mRNA catabolic process                          |                  |                   |        |        |          |                    |         |
| GO:0033365                                               |           | 2.6624087110527e-07                                                 | 10.7605677260105 |                   |        |        |          | 1.24378935713791   |         |
| 10                                                       | 473       | protein localization to organelle                                   |                  |                   |        |        |          |                    |         |
| GO:0034623                                               |           | 2.99569810090014e-07                                                | 19.2625072435774 |                   |        |        |          | 0.457546190575047  |         |
| 7                                                        | 174       | cellular macromolecular complex disassembly                         |                  |                   |        |        |          |                    |         |
| GO:0006402                                               |           | 3.49557611814805e-07                                                | 18.8066402565554 |                   |        |        |          | 0.468064493806657  |         |
| 7                                                        | 178       | mRNA catabolic process                                              |                  |                   |        |        |          |                    |         |
| GO:0032984                                               |           | 3.63097054203649e-07                                                | 18.6959864966242 |                   |        |        |          | 0.47069406961456   |         |
| 7                                                        | 179       | macromolecular complex disassembly                                  |                  |                   |        |        |          |                    |         |
| GO:0071845                                               |           | 5.91091697188702e-07                                                | 13.6589371980676 |                   |        |        |          | 0.746799529444329  |         |
| 8                                                        | 284       | cellular component disassembly at cellular level                    |                  |                   |        |        |          |                    |         |
| GO:0022411                                               |           | 6.57065928879444e-07                                                | 13.46            | 0.757317832675939 |        |        | 8        | 288                |         |
| cellular component disassembly                           |           |                                                                     |                  |                   |        |        |          |                    |         |
| GO:0006401                                               |           | 9.069777118532895e-07                                               | 16.2113066145324 |                   |        |        |          | 0.539063040620026  |         |
| 7                                                        | 205       | RNA catabolic process                                               |                  |                   |        |        |          |                    |         |
| GO:0016032                                               |           | 1.88937321413605e-06                                                | 9.80956467467624 |                   |        |        |          | 1.18593868936406   |         |
| 9                                                        | 451       | viral reproduction                                                  |                  |                   |        |        |          |                    |         |
| GO:0019058                                               |           | 2.01535733254347e-06                                                | 14.3034274193548 |                   |        |        |          | 0.607432011625493  |         |
| 7                                                        | 231       | viral infectious cycle                                              |                  |                   |        |        |          |                    |         |
| GO:0006605                                               |           | 2.84452989698194e-06                                                | 9.30901001112347 |                   |        |        |          | 1.24641893294582   |         |
| 9                                                        | 474       | protein targeting                                                   |                  |                   |        |        |          |                    |         |
| GO:0022415                                               |           | 4.41083526082151e-06                                                | 12.6380211653704 |                   |        |        |          | 0.683689710054667  |         |
| 7                                                        | 260       | viral reproductive process                                          |                  |                   |        |        |          |                    |         |
| GO:0042274                                               |           | 1.33208946821051e-05                                                | 82.2742857142857 |                   |        |        |          | 0.0473323645422462 |         |
| 3                                                        | 18        | ribosomal small subunit biogenesis                                  |                  |                   |        |        |          |                    |         |
| Tissue: Heart_Left_Ventricle=>Skin_Sun_Exposed_Lower_leg |           |                                                                     |                  |                   |        |        |          | Type: cluster      |         |
| SourceGene:                                              |           | NUDT12(ENSG00000112874.5)                                           |                  |                   |        |        |          |                    |         |
| TargetGeneSet:                                           |           | MTND2P28                                                            | RPL22            | PLOD1             | DMAP1  | RPS8   | FGGY     | RPL5               | GAS5    |
| DPYSL5                                                   | UBC       | MYO3B                                                               | NGEF             | HDLBP             | RPL15  | ZBTB20 | RYK      | GOLIM4             | EXOSC9  |
| RPS3A                                                    | NPY1R     | C4orf27                                                             | CDKN2AIP         | VDAC1             | EEF1A1 | RP11   | MESTP1   | STX7               |         |
| CCT6P1                                                   | SBDSP1    | RPS3AP26                                                            | DDHD2            | C8orf40           | HOOK3  | VPS28  | RPS6     | EEF1A1P5           |         |
| NRG3                                                     | PRG2      | C11orf31                                                            | FAM55D           | TAS2R18           | RPL6   | RIMBP2 | KIAA1704 |                    |         |
| PCDH9                                                    | SNX6      | AP5M1                                                               | IFT43            | SPSB3             | GPT2   | SPG7   | RPL26    | RPL19              | FAM195B |
| RPL17                                                    | TNFRSF11A | CCDC130                                                             | KXD1             | ZNF208            | RPL13A | ZNF350 | OLIG1    | EIF3D              | CTD     |
| TMPRSS6                                                  | TBC1D22A  | RBM3                                                                | RP3              | TBC1D8B           | MT     |        |          |                    |         |
| GOBPID                                                   | Pvalue    | OddsRatio                                                           | ExpCount         | Count             | Size   | Term   |          |                    |         |
| GO:0006414                                               |           | 4.83871524356167e-17                                                | 50.5375          | 0.385094457130994 |        |        | 13       | 105                |         |
| translational elongation                                 |           |                                                                     |                  |                   |        |        |          |                    |         |
| GO:0006415                                               |           | 3.96725263306637e-16                                                | 53.0497066995986 |                   |        |        |          | 0.333748529513528  |         |
| 12                                                       | 91        | translational termination                                           |                  |                   |        |        |          |                    |         |
| GO:0006614                                               |           | 2.36517683263292e-15                                                | 45.0196695515342 |                   |        |        |          | 0.385094457130994  |         |
| 12                                                       | 105       | SRP-dependent cotranslational protein targeting to membrane         |                  |                   |        |        |          |                    |         |
| GO:0006613                                               |           | 2.66009195205438e-15                                                | 44.5376232485729 |                   |        |        |          | 0.388762023389385  |         |
| 12                                                       | 106       | cotranslational protein targeting to membrane                       |                  |                   |        |        |          |                    |         |
| GO:0045047                                               |           | 2.66009195205438e-15                                                | 44.5376232485729 |                   |        |        |          | 0.388762023389385  |         |
| 12                                                       | 106       | protein targeting to ER                                             |                  |                   |        |        |          |                    |         |
| GO:0072599                                               |           | 2.66009195205438e-15                                                | 44.5376232485729 |                   |        |        |          | 0.388762023389385  |         |
| 12                                                       | 106       | establishment of protein localization to endoplasmic reticulum      |                  |                   |        |        |          |                    |         |
| GO:0006413                                               |           | 6.71973677287656e-15                                                | 33.3393884892086 |                   |        |        |          | 0.557470071275344  |         |
| 13                                                       | 152       | translational initiation                                            |                  |                   |        |        |          |                    |         |
| GO:0070972                                               |           | 9.99107432151821e-15                                                | 39.462494247584  | 0.43277281849007  |        |        |          |                    | 12      |
| 118                                                      | protein   | localization to endoplasmic reticulum                               |                  |                   |        |        |          |                    |         |
| GO:0000184                                               |           | 1.10822942350723e-14                                                | 39.0909505356736 |                   |        |        |          | 0.43644038474846   |         |
| 12                                                       | 119       | nuclear-transcribed mRNA catabolic process, nonsense-mediated decay |                  |                   |        |        |          |                    |         |
| GO:0000956                                               |           | 2.69407286782552e-14                                                | 29.6708333333333 |                   |        |        |          | 0.619818697667981  |         |
| 13                                                       | 169       | nuclear-transcribed mRNA catabolic process                          |                  |                   |        |        |          |                    |         |
| GO:0006402                                               |           | 5.29469460127444e-14                                                | 28.034696969697  | 0.652826793993495 |        |        |          |                    | 13      |
| 178                                                      | mRNA      | catabolic process                                                   |                  |                   |        |        |          |                    |         |
| GO:0019080                                               |           | 2.01042907346556e-13                                                | 30.0242147745218 |                   |        |        |          | 0.553802505016954  |         |

STable4\_20PerPair

|                |                                                  |                                                                     |                  |                   |       |                                                                     |        |                   |            |
|----------------|--------------------------------------------------|---------------------------------------------------------------------|------------------|-------------------|-------|---------------------------------------------------------------------|--------|-------------------|------------|
| 12             | 151                                              | viral genome expression                                             |                  |                   |       |                                                                     |        |                   |            |
| GO:0019083     |                                                  | 2.01042907346556e-13                                                | 30.0242147745218 |                   |       |                                                                     |        | 0.553802505016954 |            |
| 12             | 151                                              | viral transcription                                                 |                  |                   |       |                                                                     |        |                   |            |
| GO:0006612     |                                                  | 2.35603391360195e-13                                                | 29.5941878567722 |                   |       |                                                                     |        | 0.561137637533735 |            |
| 12             | 153                                              | protein targeting to membrane                                       |                  |                   |       |                                                                     |        |                   |            |
| GO:0043624     |                                                  | 2.35603391360195e-13                                                | 29.5941878567722 |                   |       |                                                                     |        | 0.561137637533735 |            |
| 12             | 153                                              | cellular protein complex disassembly                                |                  |                   |       |                                                                     |        |                   |            |
| GO:0006401     |                                                  | 3.28789564667675e-13                                                | 24.0466145833333 |                   |       |                                                                     |        | 0.751851082970037 |            |
| 13             | 205                                              | RNA catabolic process                                               |                  |                   |       |                                                                     |        |                   |            |
| GO:0043241     |                                                  | 3.46951584994278e-13                                                | 28.570664884731  | 0.579475468825687 |       |                                                                     |        |                   | 12         |
| 158            | protein                                          | complex disassembly                                                 |                  |                   |       |                                                                     |        |                   |            |
| GO:0034623     |                                                  | 1.1017886676168e-12                                                 | 25.7199638663053 |                   |       |                                                                     |        | 0.638156528959934 |            |
| 12             | 174                                              | cellular macromolecular complex disassembly                         |                  |                   |       |                                                                     |        |                   |            |
| GO:0019058     |                                                  | 1.51714240944642e-12                                                | 21.1399082568807 |                   |       |                                                                     |        | 0.847207805688188 |            |
| 13             | 231                                              | viral infectious cycle                                              |                  |                   |       |                                                                     |        |                   |            |
| GO:0032984     |                                                  | 1.54458173719597e-12                                                | 24.9411421060318 |                   |       |                                                                     |        | 0.656494360251886 |            |
| 12             | 179                                              | macromolecular complex disassembly                                  |                  |                   |       |                                                                     |        |                   |            |
| GO:0022415     |                                                  | 6.80504659985568e-12                                                | 18.6197368421053 |                   |       |                                                                     |        | 0.95356722718151  |            |
| 13             | 260                                              | viral reproductive process                                          |                  |                   |       |                                                                     |        |                   |            |
| GO:0072594     |                                                  | 7.27518368965008e-12                                                | 21.655487804878  | 0.748183516711646 |       |                                                                     |        |                   | 12         |
| 204            | establishment                                    | of protein localization to organelle                                |                  |                   |       |                                                                     |        |                   |            |
| GO:0071845     |                                                  | 3.42610342688023e-10                                                | 15.200143472023  | 1.04158881738288  |       |                                                                     |        |                   | 12         |
| 284            | cellular                                         | component disassembly at cellular level                             |                  |                   |       |                                                                     |        |                   |            |
| GO:0022411     |                                                  | 4.02264026677077e-10                                                | 14.9756097560976 |                   |       |                                                                     |        | 1.05625908241644  |            |
| 12             | 288                                              | cellular component disassembly                                      |                  |                   |       |                                                                     |        |                   |            |
| GO:0033365     |                                                  | 9.9851388680155e-10                                                 | 10.9014021563041 |                   |       |                                                                     |        | 1.73475884021867  |            |
| 14             | 473                                              | protein localization to organelle                                   |                  |                   |       |                                                                     |        |                   |            |
| GO:0016032     |                                                  | 6.04874592179812e-09                                                | 10.3584474885845 |                   |       |                                                                     |        | 1.65407238253408  |            |
| 13             | 451                                              | viral reproduction                                                  |                  |                   |       |                                                                     |        |                   |            |
| GO:0006605     |                                                  | 1.09617153304727e-08                                                | 9.82543383947939 |                   |       |                                                                     |        | 1.73842640647706  |            |
| 13             | 474                                              | protein targeting                                                   |                  |                   |       |                                                                     |        |                   |            |
| GO:0016197     |                                                  | 9.12150819894347e-06                                                | 14.2320478723404 |                   |       |                                                                     |        | 0.491453878624317 |            |
| 6              | 134                                              | endosomal transport                                                 |                  |                   |       |                                                                     |        |                   |            |
| GO:0022613     |                                                  | 1.69430301796759e-05                                                | 9.89828480255285 |                   |       |                                                                     |        | 0.825202408137845 |            |
| 7              | 225                                              | ribonucleoprotein complex biogenesis                                |                  |                   |       |                                                                     |        |                   |            |
| Tissue:        | Skin_Sun_Exposed_Lower_leg=>Heart_Left_Ventricle |                                                                     |                  |                   |       |                                                                     |        | Type:             | asymmetric |
| SourceGene:    | PGRMC1(ENSG00000101856.8)                        |                                                                     |                  |                   |       |                                                                     |        |                   |            |
| TargetGeneSet: | TRAPPC12                                         | TCEB1P21                                                            | RPL37A           | KLHL30            | RPL32 | RPL29                                                               | ERC2   |                   |            |
| RP11           | LYSMD3                                           | RPS14                                                               | RPS10            | MRPS12            | RP3   | ELP3                                                                | TMEM65 | RPL8              | DNLZ       |
| SETP17         | C11orf75                                         | MRPS36P4                                                            | CACNA1C          | RILPL1            | RPL13 | OR3A3                                                               | CCL2   |                   |            |
| RPS15          | RPL36                                            | RPL18                                                               | RPS11            | RPS5              | RPS21 |                                                                     |        |                   |            |
| GOBPID         | Pvalue                                           | OddsRatio                                                           | ExpCount         | Count             | Size  | Term                                                                |        |                   |            |
| GO:0006415     |                                                  | 2.36525599733211e-23                                                | 217.409090909091 |                   |       | translational termination                                           |        | 0.151131409591032 |            |
| 13             | 91                                               | translational termination                                           |                  |                   |       |                                                                     |        |                   |            |
| GO:0006414     |                                                  | 1.70532207841082e-22                                                | 184.145256916996 |                   |       | translational elongation                                            |        | 0.17438239568196  |            |
| 13             | 105                                              | translational elongation                                            |                  |                   |       |                                                                     |        |                   |            |
| GO:0006614     |                                                  | 1.70532207841082e-22                                                | 184.145256916996 |                   |       | SRP-dependent cotranslational protein targeting to membrane         |        | 0.17438239568196  |            |
| 13             | 105                                              | SRP-dependent cotranslational protein targeting to membrane         |                  |                   |       |                                                                     |        |                   |            |
| GO:0006613     |                                                  | 1.94231758806374e-22                                                | 182.152492668622 |                   |       | cotranslational protein targeting to membrane                       |        | 0.17604318040274  |            |
| 13             | 106                                              | cotranslational protein targeting to membrane                       |                  |                   |       |                                                                     |        |                   |            |
| GO:0045047     |                                                  | 1.94231758806374e-22                                                | 182.152492668622 |                   |       | protein targeting to ER                                             |        | 0.17604318040274  |            |
| 13             | 106                                              | protein targeting to ER                                             |                  |                   |       |                                                                     |        |                   |            |
| GO:0072599     |                                                  | 1.94231758806374e-22                                                | 182.152492668622 |                   |       | establishment of protein localization to endoplasmic reticulum      |        | 0.17604318040274  |            |
| 13             | 106                                              | establishment of protein localization to endoplasmic reticulum      |                  |                   |       |                                                                     |        |                   |            |
| GO:0070972     |                                                  | 8.41874403674507e-22                                                | 161.2            | 0.195972597052107 |       | protein localization to endoplasmic reticulum                       | 13     |                   | 118        |
| GO:0000184     |                                                  | 9.44450207397793e-22                                                | 159.668096054889 |                   |       | nuclear-transcribed mRNA catabolic process, nonsense-mediated decay |        | 0.197633381772888 |            |
| 13             | 119                                              | nuclear-transcribed mRNA catabolic process, nonsense-mediated decay |                  |                   |       |                                                                     |        |                   |            |
| GO:0019080     |                                                  | 2.36729203985515e-20                                                | 122.369565217391 |                   |       | viral genome expression                                             |        | 0.250778492837866 |            |
| 13             | 151                                              | viral genome expression                                             |                  |                   |       |                                                                     |        |                   |            |
| GO:0019083     |                                                  | 2.36729203985515e-20                                                | 122.369565217391 |                   |       | viral transcription                                                 |        | 0.250778492837866 |            |
| 13             | 151                                              | viral transcription                                                 |                  |                   |       |                                                                     |        |                   |            |
| GO:0006413     |                                                  | 2.58684652205297e-20                                                | 121.480706344016 |                   |       |                                                                     |        | 0.252439277558646 |            |

STable4\_20PerPair

|                                                          |          |                                                    |                  |        |         |                                                                |           |               |                    |
|----------------------------------------------------------|----------|----------------------------------------------------|------------------|--------|---------|----------------------------------------------------------------|-----------|---------------|--------------------|
| 13                                                       | 152      | translational initiation                           |                  |        |         |                                                                |           |               |                    |
| GO:0006612                                               |          | 2.82503658286128e-20                               | 120.604545454545 |        |         |                                                                |           |               | 0.254100062279427  |
| 13                                                       | 153      | protein targeting to membrane                      |                  |        |         |                                                                |           |               |                    |
| GO:0043624                                               |          | 2.82503658286128e-20                               | 120.604545454545 |        |         |                                                                |           |               | 0.254100062279427  |
| 13                                                       | 153      | cellular protein complex disassembly               |                  |        |         |                                                                |           |               |                    |
| GO:0043241                                               |          | 4.34944305560692e-20                               | 116.405015673981 |        |         |                                                                |           |               | 0.26240398588333   |
| 13                                                       | 158      | protein complex disassembly                        |                  |        |         |                                                                |           |               |                    |
| GO:0019058                                               |          | 8.15435952605171e-20                               | 91.6774193548387 |        |         |                                                                |           |               | 0.383641270500311  |
| 14                                                       | 231      | viral infectious cycle                             |                  |        |         |                                                                |           |               |                    |
| GO:0000956                                               |          | 1.07082145951018e-19                               | 108.113636363636 |        |         |                                                                |           |               | 0.280672617811916  |
| 13                                                       | 169      | nuclear-transcribed mRNA catabolic process         |                  |        |         |                                                                |           |               |                    |
| GO:0034623                                               |          | 1.58064540448204e-19                               | 104.719367588933 |        |         |                                                                |           |               | 0.288976541415819  |
| 13                                                       | 174      | cellular macromolecular complex disassembly        |                  |        |         |                                                                |           |               |                    |
| GO:0006402                                               |          | 2.14045600967934e-19                               | 102.152066115702 |        |         |                                                                |           |               | 0.295619680298941  |
| 13                                                       | 178      | mRNA catabolic process                             |                  |        |         |                                                                |           |               |                    |
| GO:0032984                                               |          | 2.30643262079744e-19                               | 101.529572836802 |        |         |                                                                |           |               | 0.297280465019722  |
| 13                                                       | 179      | macromolecular complex disassembly                 |                  |        |         |                                                                |           |               |                    |
| GO:0022415                                               |          | 4.38531556145992e-19                               | 80.7048780487805 |        |         |                                                                |           |               | 0.431804027402948  |
| 14                                                       | 260      | viral reproductive process                         |                  |        |         |                                                                |           |               |                    |
| GO:0072594                                               |          | 1.3107907802754e-18                                | 88.0856734888148 |        |         |                                                                |           |               | 0.338800083039236  |
| 13                                                       | 204      | establishment of protein localization to organelle |                  |        |         |                                                                |           |               |                    |
| GO:0006401                                               |          | 1.39854045986023e-18                               | 87.6207386363636 |        |         |                                                                |           |               | 0.340460867760017  |
| 13                                                       | 205      | RNA catabolic process                              |                  |        |         |                                                                |           |               |                    |
| GO:0071845                                               |          | 1.02100164815464e-16                               | 61.7336464273734 |        |         |                                                                |           |               | 0.471662860701682  |
| 13                                                       | 284      | cellular component disassembly at cellular level   |                  |        |         |                                                                |           |               |                    |
| GO:0022411                                               |          | 1.22587654717886e-16                               | 60.8185123966942 |        |         |                                                                |           |               | 0.478305999584804  |
| 13                                                       | 288      | cellular component disassembly                     |                  |        |         |                                                                |           |               |                    |
| GO:0016032                                               |          | 1.00514907255067e-15                               | 44.8192219679634 |        |         |                                                                |           |               | 0.749013909072037  |
| 14                                                       | 451      | viral reproduction                                 |                  |        |         |                                                                |           |               |                    |
| GO:0033365                                               |          | 7.55931581953024e-14                               | 35.8835968379447 |        |         |                                                                |           |               | 0.785551172929209  |
| 13                                                       | 473      | protein localization to organelle                  |                  |        |         |                                                                |           |               |                    |
| GO:0006605                                               |          | 7.76682818723057e-14                               | 35.8031946361664 |        |         |                                                                |           |               | 0.78721195764999   |
| 13                                                       | 474      | protein targeting                                  |                  |        |         |                                                                |           |               |                    |
| GO:0042274                                               |          | 3.23105168313163e-06                               | 137.257142857143 |        |         |                                                                |           |               | 0.0298941249740502 |
| 3                                                        | 18       | ribosomal small subunit biogenesis                 |                  |        |         |                                                                |           |               |                    |
| Tissue: Skin_Sun_Exposed_Lower_leg=>Heart_Left_Ventricle |          |                                                    |                  |        |         |                                                                |           | Type: cluster |                    |
| SourceGene:                                              |          | RP11-16C18.3(ENSG00000237027.1)                    |                  |        |         |                                                                |           |               |                    |
| TargetGeneSet:                                           | CEP104   | RP13                                               | RPL11            | RPL5   | ACBD6   | BCL11A                                                         | LRRTM4    | COX5B         |                    |
| RPL31                                                    | RPL15    | RP11                                               | BCL6             | RPL35A | BRIX1   | CTD                                                            | SOX9      | ARHGEF37      |                    |
| SSR1                                                     | C6orf106 | MRPL2                                              | MRPS12           | SEC61B | CTSL1P7 | LCOR                                                           | FAM160B1  |               |                    |
| RPLP2                                                    | EIF3F    | RPS13                                              | FAU              | RPS25  | ZBTB44  | RAPGEF3                                                        | RPL14P1   | SNRPF         | RPS2P5             |
| LINC00427                                                | UCHL3    | MRPL52                                             | AP1G2            | SCFD1  | RPS29   | SLIRP                                                          | LINC00521 |               | RPL4               |
| AKAP13                                                   | HN1L     | U6                                                 | WWOX             | RPL26  | NT5M    | SLC47A1                                                        | RPL23A    | RPL17         | RPL19              |
| ALYREF                                                   | RPL36    | UBA52                                              | PDCD2L           | RPL18  | HSPA13  | EP300                                                          | SMS       | EEF1B2P3      |                    |
| PHF16                                                    | RPS4X    | UTP14A                                             |                  |        |         |                                                                |           |               |                    |
| GOBPID                                                   | Pvalue   | OddsRatio                                          | ExpCount         | Count  | Size    | Term                                                           |           |               |                    |
| GO:0006614                                               |          | 3.29506663625902e-34                               | 122.397979012826 |        |         | SRP-dependent cotranslational protein targeting to membrane    |           |               | 0.385094457130994  |
| 22                                                       | 105      |                                                    |                  |        |         |                                                                |           |               |                    |
| GO:0006613                                               |          | 4.14947076419811e-34                               | 120.932411674347 |        |         | cotranslational protein targeting to membrane                  |           |               | 0.388762023389385  |
| 22                                                       | 106      |                                                    |                  |        |         |                                                                |           |               |                    |
| GO:0045047                                               |          | 4.14947076419811e-34                               | 120.932411674347 |        |         | protein targeting to ER                                        |           |               | 0.388762023389385  |
| 22                                                       | 106      |                                                    |                  |        |         |                                                                |           |               |                    |
| GO:0072599                                               |          | 4.14947076419811e-34                               | 120.932411674347 |        |         | establishment of protein localization to endoplasmic reticulum |           |               | 0.388762023389385  |
| 22                                                       | 106      |                                                    |                  |        |         |                                                                |           |               |                    |
| GO:0070972                                               |          | 5.52840024039884e-33                               | 105.727150537634 |        |         | protein localization to endoplasmic reticulum                  |           |               | 0.43277281849007   |
| 22                                                       | 118      |                                                    |                  |        |         |                                                                |           |               |                    |
| GO:0006415                                               |          | 1.76933814408103e-31                               | 122.296201451131 |        |         | translational termination                                      |           |               | 0.333748529513528  |
| 20                                                       | 91       |                                                    |                  |        |         |                                                                |           |               |                    |
| GO:0006612                                               |          | 2.57782576196683e-30                               | 77.2898300911106 |        |         | protein targeting to membrane                                  |           |               | 0.561137637533735  |
| 22                                                       | 153      |                                                    |                  |        |         |                                                                |           |               |                    |
| GO:0006414                                               |          | 4.14342998131729e-30                               | 102.053475935829 |        |         | translational elongation                                       |           |               | 0.385094457130994  |
| 20                                                       | 105      |                                                    |                  |        |         |                                                                |           |               |                    |
| GO:0000184                                               |          | 6.25253485109073e-29                               | 87.5359657177839 |        |         |                                                                |           |               | 0.43644038474846   |

Stable4\_20PerPair

|            |     |                                                                     |                  |                   |  |  |    |                    |     |
|------------|-----|---------------------------------------------------------------------|------------------|-------------------|--|--|----|--------------------|-----|
| 20         | 119 | nuclear-transcribed mRNA catabolic process, nonsense-mediated decay |                  |                   |  |  |    |                    |     |
| GO:0019080 |     | 1.43194412988401e-28                                                | 72.0259615384615 |                   |  |  |    | 0.553802505016954  |     |
| 21         | 151 | viral genome expression                                             |                  |                   |  |  |    |                    |     |
| GO:0019083 |     | 1.43194412988401e-28                                                | 72.0259615384615 |                   |  |  |    | 0.553802505016954  |     |
| 21         | 151 | viral transcription                                                 |                  |                   |  |  |    |                    |     |
| GO:0006413 |     | 1.65794688744108e-28                                                | 71.4711354961832 |                   |  |  |    | 0.557470071275344  |     |
| 21         | 152 | translational initiation                                            |                  |                   |  |  |    |                    |     |
| GO:0072594 |     | 1.9617378947663e-27                                                 | 55.4328252392769 |                   |  |  |    | 0.748183516711646  |     |
| 22         | 204 | establishment of protein localization to organelle                  |                  |                   |  |  |    |                    |     |
| GO:0043624 |     | 1.31050972554044e-26                                                | 65.0034176349966 |                   |  |  |    | 0.561137637533735  |     |
| 20         | 153 | cellular protein complex disassembly                                |                  |                   |  |  |    |                    |     |
| GO:0043241 |     | 2.57408670569871e-26                                                | 62.6262626262626 |                   |  |  |    | 0.579475468825687  |     |
| 20         | 158 | protein complex disassembly                                         |                  |                   |  |  |    |                    |     |
| GO:0000956 |     | 1.05117443232579e-25                                                | 57.9581045352857 |                   |  |  |    | 0.619818697667981  |     |
| 20         | 169 | nuclear-transcribed mRNA catabolic process                          |                  |                   |  |  |    |                    |     |
| GO:0034623 |     | 1.92904013762762e-25                                                | 56.0566706021251 |                   |  |  |    | 0.638156528959934  |     |
| 20         | 174 | cellular macromolecular complex disassembly                         |                  |                   |  |  |    |                    |     |
| GO:0006402 |     | 3.09348793557785e-25                                                | 54.6221710778673 |                   |  |  |    | 0.652826793993495  |     |
| 20         | 178 | mRNA catabolic process                                              |                  |                   |  |  |    |                    |     |
| GO:0032984 |     | 3.47494743442156e-25                                                | 54.274823708786  | 0.656494360251886 |  |  |    |                    | 20  |
| 179        |     | macromolecular complex disassembly                                  |                  |                   |  |  |    |                    |     |
| GO:0022415 |     | 4.70508112989575e-25                                                | 42.2228246137165 |                   |  |  |    | 0.95356722718151   |     |
| 22         | 260 | viral reproductive process                                          |                  |                   |  |  |    |                    |     |
| GO:0019058 |     | 1.53164327185711e-24                                                | 44.3375          | 0.847207805688188 |  |  | 21 |                    | 231 |
|            |     | viral infectious cycle                                              |                  |                   |  |  |    |                    |     |
| GO:0006401 |     | 5.71295170166455e-24                                                | 46.5618345618346 |                   |  |  |    | 0.751851082970037  |     |
| 20         | 205 | RNA catabolic process                                               |                  |                   |  |  |    |                    |     |
| GO:0033365 |     | 4.16162608129544e-22                                                | 25.7104677060134 |                   |  |  |    | 1.73475884021867   |     |
| 24         | 473 | protein localization to organelle                                   |                  |                   |  |  |    |                    |     |
| GO:0006605 |     | 4.37487273719778e-22                                                | 25.6514942528736 |                   |  |  |    | 1.73842640647706   |     |
| 24         | 474 | protein targeting                                                   |                  |                   |  |  |    |                    |     |
| GO:0071845 |     | 4.27362753063403e-21                                                | 32.4471992653811 |                   |  |  |    | 1.04158881738288   |     |
| 20         | 284 | cellular component disassembly at cellular level                    |                  |                   |  |  |    |                    |     |
| GO:0022411 |     | 5.65794276077651e-21                                                | 31.9538670284939 |                   |  |  |    | 1.05625908241644   |     |
| 20         | 288 | cellular component disassembly                                      |                  |                   |  |  |    |                    |     |
| GO:0016032 |     | 8.54399763582425e-20                                                | 23.1083540115798 |                   |  |  |    | 1.65407238253408   |     |
| 22         | 451 | viral reproduction                                                  |                  |                   |  |  |    |                    |     |
| GO:0042273 |     | 7.80863562374655e-08                                                | 146.836734693878 |                   |  |  |    | 0.0440107951006851 |     |
| 4          | 12  | ribosomal large subunit biogenesis                                  |                  |                   |  |  |    |                    |     |
| GO:0022613 |     | 1.12022401523491e-07                                                | 13.4299242424242 |                   |  |  |    | 0.825202408137845  |     |
| 9          | 225 | ribonucleoprotein complex biogenesis                                |                  |                   |  |  |    |                    |     |
| GO:0071843 |     | 1.87325294137031e-07                                                | 12.6             | 0.876548335755311 |  |  | 9  |                    | 239 |
|            |     | cellular component biogenesis at cellular level                     |                  |                   |  |  |    |                    |     |
| GO:0042254 |     | 1.11473650659671e-06                                                | 15.2774035517453 |                   |  |  |    | 0.546467372500173  |     |
| 7          | 149 | ribosome biogenesis                                                 |                  |                   |  |  |    |                    |     |
|            |     | Tissue: Heart_Left_Ventricle=>Skin_Sun_Exposed_Lower_leg            |                  |                   |  |  |    | Type: cluster      |     |
|            |     | SourceGene: RP11-332L8.1(ENSG00000237861.1)                         |                  |                   |  |  |    |                    |     |
|            |     | TargetGeneSet: RP11 RP4 RBM8A MIR4426 ST13P19 ZC3H11B YPEL5 DPY30   |                  |                   |  |  |    |                    |     |
|            |     | RPL31 PSMD14 RPL37A CRBN RPL32 ATG3 RPL35A PRSS12 CTD RPL37 NSA2    |                  |                   |  |  |    |                    |     |
|            |     | PHAX DCTN4 TTC1 RPL24P4 ZBTB2 BCL7B NYAP1 WASL SORBS3 RPL30         |                  |                   |  |  |    |                    |     |
|            |     | UTP23 C9orf78 UCK1 SRP9P1 RPL13AP5 NAV2-AS1 TAS2R20 RPL14P1         |                  |                   |  |  |    |                    |     |
|            |     | RILPL2 RPS7P10 RNF6 UPF3A NDNL2 SELS EIF3C CD2BP2 AMFR RPS2P46      |                  |                   |  |  |    |                    |     |
|            |     | RPL19 ORMDL3 DHX40 RPS16 EID2 RPS11 EEF1B2P3 GPKOW ARMCX1 RP3       |                  |                   |  |  |    |                    |     |
|            |     | RP13 DAZ3                                                           |                  |                   |  |  |    |                    |     |
|            |     | GOBPID Pvalue OddsRatio ExpCount Count Size Term                    |                  |                   |  |  |    |                    |     |
| GO:0000184 |     | 1.89169548238353e-14                                                | 48.5561728395062 |                   |  |  |    | 0.337623693862016  |     |
| 11         | 119 | nuclear-transcribed mRNA catabolic process, nonsense-mediated decay |                  |                   |  |  |    |                    |     |
| GO:0000956 |     | 9.40718587582297e-13                                                | 33.0742616033755 |                   |  |  |    | 0.479482388762023  |     |
| 11         | 169 | nuclear-transcribed mRNA catabolic process                          |                  |                   |  |  |    |                    |     |
| GO:0006402 |     | 1.66441886117584e-12                                                | 31.2720558882236 |                   |  |  |    | 0.505016953844025  |     |
| 11         | 178 | mRNA catabolic process                                              |                  |                   |  |  |    |                    |     |
| GO:0006415 |     | 3.0848556803244e-12                                                 | 49.1432926829268 |                   |  |  |    | 0.258182824718013  |     |
| 9          | 91  | translational termination                                           |                  |                   |  |  |    |                    |     |

Stable4\_20PerPair

|                                                          |                                                                |                  |                   |                         |
|----------------------------------------------------------|----------------------------------------------------------------|------------------|-------------------|-------------------------|
| GO:0006401                                               | 7.79345903785994e-12                                           | 26.8687285223368 | 0.581620649090028 |                         |
| 11 205                                                   | RNA catabolic process                                          |                  |                   |                         |
| GO:0006413                                               | 1.0429104271136e-11                                            | 32.412539754657  | 0.431250432496021 | 10                      |
| 152                                                      | translational initiation                                       |                  |                   |                         |
| GO:0006612                                               | 1.11364910838922e-11                                           | 32.1836228287841 | 0.434087606394021 |                         |
| 10 153                                                   | protein targeting to membrane                                  |                  |                   |                         |
| GO:0006414                                               | 1.1500479901178e-11                                            | 41.935546875     | 0.297903259290015 | 9                       |
| 105                                                      | translational elongation                                       |                  |                   |                         |
| GO:0006614                                               | 1.1500479901178e-11                                            | 41.935546875     | 0.297903259290015 | 9                       |
| 105                                                      | SRP-dependent cotranslational protein targeting to membrane    |                  |                   |                         |
| GO:0006613                                               | 1.25423704941304e-11                                           | 41.5003221649485 | 0.300740433188015 |                         |
| 9 106                                                    | cotranslational protein targeting to membrane                  |                  |                   |                         |
| GO:0045047                                               | 1.25423704941304e-11                                           | 41.5003221649485 | 0.300740433188015 |                         |
| 9 106                                                    | protein targeting to ER                                        |                  |                   |                         |
| GO:0072599                                               | 1.25423704941304e-11                                           | 41.5003221649485 | 0.300740433188015 |                         |
| 9 106                                                    | establishment of protein localization to endoplasmic reticulum |                  |                   |                         |
| GO:0070972                                               | 3.33367514143575e-11                                           | 36.9005160550459 | 0.334786519964016 |                         |
| 9 118                                                    | protein localization to endoplasmic reticulum                  |                  |                   |                         |
| GO:0019080                                               | 3.0780454364018e-10                                            | 28.2596830985915 | 0.428413258598021 |                         |
| 9 151                                                    | viral genome expression                                        |                  |                   |                         |
| GO:0019083                                               | 3.0780454364018e-10                                            | 28.2596830985915 | 0.428413258598021 |                         |
| 9 151                                                    | viral transcription                                            |                  |                   |                         |
| GO:0043624                                               | 3.46231979714923e-10                                           | 27.86328125      | 0.434087606394021 | 9                       |
| 153                                                      | cellular protein complex disassembly                           |                  |                   |                         |
| GO:0043241                                               | 4.61374173750134e-10                                           | 26.9188338926174 | 0.448273475884022 |                         |
| 9 158                                                    | protein complex disassembly                                    |                  |                   |                         |
| GO:0034623                                               | 1.08778441201842e-09                                           | 24.28125         | 0.493668258252024 | 9                       |
| 174                                                      | cellular macromolecular complex disassembly                    |                  |                   |                         |
| GO:0032984                                               | 1.39799328206266e-09                                           | 23.5588235294118 | 0.507854127742025 |                         |
| 9 179                                                    | macromolecular complex disassembly                             |                  |                   |                         |
| GO:0072594                                               | 4.4227488584892e-09                                            | 20.5024038461538 | 0.578783475192028 |                         |
| 9 204                                                    | establishment of protein localization to organelle             |                  |                   |                         |
| GO:0019058                                               | 1.30952947058241e-08                                           | 17.9746621621622 | 0.655387170438032 |                         |
| 9 231                                                    | viral infectious cycle                                         |                  |                   |                         |
| GO:0022415                                               | 3.6450655186889e-08                                            | 15.8654133466135 | 0.737665213480036 |                         |
| 9 260                                                    | viral reproductive process                                     |                  |                   |                         |
| GO:0071845                                               | 7.7797305744964e-08                                            | 14.45625         | 0.805757387032039 | 9                       |
| 284                                                      | cellular component disassembly at cellular level               |                  |                   |                         |
| GO:0022411                                               | 8.76806949627709e-08                                           | 14.2449596774194 | 0.81710608262404  |                         |
| 9 288                                                    | cellular component disassembly                                 |                  |                   |                         |
| GO:0016032                                               | 3.73388083111285e-07                                           | 10.2179796649843 | 1.27956542799806  |                         |
| 10 451                                                   | viral reproduction                                             |                  |                   |                         |
| GO:0006605                                               | 5.89368934217687e-07                                           | 9.69549499443827 | 1.34482042765207  |                         |
| 10 474                                                   | protein targeting                                              |                  |                   |                         |
| GO:0022613                                               | 2.89559201436361e-06                                           | 13.4031300593632 | 0.638364127050031 |                         |
| 7 225                                                    | ribonucleoprotein complex biogenesis                           |                  |                   |                         |
| GO:0071843                                               | 4.31571459631471e-06                                           | 12.5818965517241 | 0.678084561622033 |                         |
| 7 239                                                    | cellular component biogenesis at cellular level                |                  |                   |                         |
| GO:0033365                                               | 5.50598763044479e-06                                           | 8.45325969827586 | 1.34198325375407  |                         |
| 9 473                                                    | protein localization to organelle                              |                  |                   |                         |
| Tissue: Skin_Sun_Exposed_Lower_leg=>Heart_Left_Ventricle |                                                                |                  | Type: asymmetric  |                         |
| SourceGene:                                              | RP11-697K23.1(ENSG00000230530.1)                               |                  |                   |                         |
| TargetGeneSet:                                           | RPL11 RP4 HSPB11 RP11 ISG20L2 SNRPE LINC00467                  |                  |                   |                         |
| RPL31 UBE2V1                                             | RPL37A MRPS36P1                                                | CCDC72           | RPL35A FGFBP1     | RPL37 CTD               |
| ZMAT2 CTB                                                | HMGN3 HOXA10 PPIA                                              | ECD              | SNHG6 RPL7        | C8orf59 RPL30           |
| EIF5AL1 LGI1                                             | RPL13AP5                                                       | RPS13            | RPS25 PFDN5       | NDUFA12 RPS7P10 RPL7AP6 |
| SLIRP SLC9A5                                             | RPL26 RPL17                                                    | RPL38            | ZNF446 ZNF788     | C19orf43 CHMP4B         |
| ZFP64 ZNF280B                                            | EEF1B2P3                                                       |                  |                   |                         |
| GOBPID                                                   | Pvalue OddsRatio ExpCount Count Size Term                      |                  |                   |                         |
| GO:0006415                                               | 1.3235913401609e-20                                            | 108.621212121212 | 0.220399972320255 |                         |
| 13 91                                                    | translational termination                                      |                  |                   |                         |
| GO:0006414                                               | 9.4483628916079e-20                                            | 92.001976284585  | 0.254307660369525 | 13                      |
| 105                                                      | translational elongation                                       |                  |                   |                         |

Stable4\_20PerPair

|                                           |                      |                                                                     |                   |    |
|-------------------------------------------|----------------------|---------------------------------------------------------------------|-------------------|----|
| GO:0006614                                | 8.23690392874817e-18 | 80.3534361851332                                                    | 0.254307660369525 |    |
| 12                                        | 105                  | SRP-dependent cotranslational protein targeting to membrane         |                   |    |
| GO:0006613                                | 9.2746953447363e-18  | 79.4930619796485                                                    | 0.25672963808733  |    |
| 12                                        | 106                  | cotranslational protein targeting to membrane                       |                   |    |
| GO:0045047                                | 9.2746953447363e-18  | 79.4930619796485                                                    | 0.25672963808733  |    |
| 12                                        | 106                  | protein targeting to ER                                             |                   |    |
| GO:0072599                                | 9.2746953447363e-18  | 79.4930619796485                                                    | 0.25672963808733  |    |
| 12                                        | 106                  | establishment of protein localization to endoplasmic reticulum      |                   |    |
| GO:0043624                                | 1.51258162845701e-17 | 60.2558441558442                                                    | 0.370562590824164 |    |
| 13                                        | 153                  | cellular protein complex disassembly                                |                   |    |
| GO:0043241                                | 2.32048493093861e-17 | 58.1576802507837                                                    | 0.382672479413189 |    |
| 13                                        | 158                  | protein complex disassembly                                         |                   |    |
| GO:0070972                                | 3.53222326000842e-17 | 70.4347826086957                                                    | 0.28579337070099  |    |
| 12                                        | 118                  | protein localization to endoplasmic reticulum                       |                   |    |
| GO:0000184                                | 3.92255015796649e-17 | 69.7716375457131                                                    | 0.288215348418795 |    |
| 12                                        | 119                  | nuclear-transcribed mRNA catabolic process, nonsense-mediated decay |                   |    |
| GO:0034623                                | 8.33715556476071e-17 | 52.3193111236589                                                    | 0.421424122898069 |    |
| 13                                        | 174                  | cellular macromolecular complex disassembly                         |                   |    |
| GO:0032984                                | 1.21219596404493e-16 | 50.7256297918949                                                    | 0.433534011487094 |    |
| 13                                        | 179                  | macromolecular complex disassembly                                  |                   |    |
| GO:0019080                                | 7.38464718823052e-16 | 53.588989677823                                                     | 0.365718635388554 | 12 |
| 151                                       |                      | viral genome expression                                             |                   |    |
| GO:0019083                                | 7.38464718823052e-16 | 53.588989677823                                                     | 0.365718635388554 | 12 |
| 151                                       |                      | viral transcription                                                 |                   |    |
| GO:0006413                                | 8.00573661742737e-16 | 53.2024844720497                                                    | 0.368140613106359 |    |
| 12                                        | 152                  | translational initiation                                            |                   |    |
| GO:0006612                                | 8.67420286888113e-16 | 52.8214616096207                                                    | 0.370562590824164 |    |
| 12                                        | 153                  | protein targeting to membrane                                       |                   |    |
| GO:0000956                                | 2.9167203549835e-15  | 47.3852118526724                                                    | 0.409314234309044 |    |
| 12                                        | 169                  | nuclear-transcribed mRNA catabolic process                          |                   |    |
| GO:0019058                                | 3.43206911950644e-15 | 38.4849874895746                                                    | 0.559476852812954 |    |
| 13                                        | 231                  | viral infectious cycle                                              |                   |    |
| GO:0006402                                | 5.47603091337228e-15 | 44.7878470403353                                                    | 0.431112033769289 |    |
| 12                                        | 178                  | mRNA catabolic process                                              |                   |    |
| GO:0022415                                | 1.59263847671525e-14 | 33.8971291866029                                                    | 0.629714206629299 |    |
| 13                                        | 260                  | viral reproductive process                                          |                   |    |
| GO:0072594                                | 2.84182596419508e-14 | 38.6521739130435                                                    | 0.494083454432219 |    |
| 12                                        | 204                  | establishment of protein localization to organelle                  |                   |    |
| GO:0006401                                | 3.01403382904676e-14 | 38.4492002703312                                                    | 0.496505432150024 |    |
| 12                                        | 205                  | RNA catabolic process                                               |                   |    |
| GO:0071845                                | 4.97717584360643e-14 | 30.8428379738343                                                    | 0.687841671856619 |    |
| 13                                        | 284                  | cellular component disassembly at cellular level                    |                   |    |
| GO:0022411                                | 5.95874574839357e-14 | 30.3856198347107                                                    | 0.697529582727839 |    |
| 13                                        | 288                  | cellular component disassembly                                      |                   |    |
| GO:0016032                                | 8.67784210839148e-13 | 21.3257055682685                                                    | 1.09231195073005  |    |
| 14                                        | 451                  | viral reproduction                                                  |                   |    |
| GO:0033365                                | 5.53917792190179e-10 | 15.7936433084976                                                    | 1.14559546052176  |    |
| 12                                        | 473                  | protein localization to organelle                                   |                   |    |
| GO:0006605                                | 5.67447946559664e-10 | 15.7583286278938                                                    | 1.14801743823957  |    |
| 12                                        | 474                  | protein targeting                                                   |                   |    |
| GO:0042273                                | 1.40745924811973e-08 | 232.387096774194                                                    | 0.02906373261366  |    |
| 4                                         | 12                   | ribosomal large subunit biogenesis                                  |                   |    |
| GO:0022613                                | 4.99760970587808e-08 | 19.3876088069636                                                    | 0.544944986506124 |    |
| 8                                         | 225                  | ribonucleoprotein complex biogenesis                                |                   |    |
| GO:0071843                                | 7.97107515811943e-08 | 18.1946448613115                                                    | 0.578852674555394 |    |
| 8                                         | 239                  | cellular component biogenesis at cellular level                     |                   |    |
| GO:0042254                                | 1.37762246487303e-06 | 20.6505907885218                                                    | 0.360874679952944 |    |
| 6                                         | 149                  | ribosome biogenesis                                                 |                   |    |
| Tissue: whole_Blood=>Heart_Left_Ventricle |                      | Type: asymmetric                                                    |                   |    |

STable4\_20PerPair

SourceGene: CAMK1D(ENSG00000183049.8) calcium/calmodulin-dependent protein kinase ID

TargetGeneSet: ATP6V0B RP11 HFE2 RNF115 NES CCL15 ASPM CENPF  
 EIF2AK3 BUB1 EXOG ZNF595 CD38 NADKD1 RHOBTB3 HSPA9 ARHGAP26  
 SH3PXD2B LRRRC16A TNFRSF21 UBE3D EGFR GATSL2 GNRH1 PBK  
 COBRA1 IL2RA CDK1 PBLD PDLIM1 NT5C2 C11orf92 C11orf93  
 VPS26B TROAP MIS18BP1 DLGAP5 VRK1 ARHGAP11A BUB1B CASC5 PRC1  
 VPS35 CRISPLD2 MIR22HG TOP2A CCDC40 TPX2

| GOBPID                      | Pvalue   | OddsRatio | ExpCount    | Count       | Size | Term     |
|-----------------------------|----------|-----------|-------------|-------------|------|----------|
| GO:0000280                  | 4.14E-09 |           | 14.26613201 | 1.041450419 | 11   | 350      |
| nuclear division            |          |           |             |             |      |          |
| GO:0007067                  | 4.14E-09 |           | 14.26613201 | 1.041450419 | 11   | 350      |
| mitosis                     |          |           |             |             |      |          |
| GO:0000087                  | 5.55E-09 |           | 13.84751074 | 1.071206145 | 11   | 360 M    |
| phase of mitotic cell cycle |          |           |             |             |      |          |
| GO:0048285                  | 7.38E-09 |           | 13.452211   | 1.100961871 | 11   | 370      |
| organelle fission           |          |           |             |             |      |          |
| GO:0051301                  | 5.78E-08 |           | 10.88697562 | 1.344958826 | 11   | 452 cell |
| division                    |          |           |             |             |      |          |
| GO:0071173                  | 2.95E-06 |           | 49.15555556 | 0.101169469 | 4    | 34       |
| spindle assembly checkpoint |          |           |             |             |      |          |
| GO:0031577                  | 7.01E-06 |           | 38.7854251  | 0.12497405  | 4    | 42       |
| spindle checkpoint          |          |           |             |             |      |          |

STable4\_20PerPair

GO:0030071 7.71E-06 37.78829717 0.127949623 4 43  
 regulation of mitotic metaphase/anaphase transition

GO:0007091 9.27E-06 35.93996248 0.133900768 4 45  
 mitotic metaphase/anaphase transition

Tissue: whole\_blood=>Heart\_Left\_Ventricle Type: cluster

SourceGene: CCDC144A(ENSG00000170160.10) coiled-coil domain containing 144A

TargetGeneSet: KHDRBS1 GNG5 HBXIP MDM4 MOGS SUCLG1 TSPO NDUFB3  
 RPL32 KIAA2018 UBXN7 NDUFC1 NDUFS6 JMY RPL39P3 COQ3 REV3L RP11  
 RNASET2 RBAK SRI RBM48 GIGYF1 DOCK5 RPL30 CYC1 NDUFB6 RPL35 U8  
 ZNF22 POLR3A RPL13AP5 RPL27A NDUFS3 TRMT112 FAU NUMA1 C11orf67  
 USP35 C11orf1 FOXRED1 DHX37 RPS29 PROX2 SLIRP C15orf57 ANP32A  
 GOLGA6L4 SLC9A5 C1QBP LSMD1 CCDC144A FAM106A SRP68P2 FBXL20 GJC1  
 SNRPD1 RPS15 RPL36 MRPL4 C19orf43 MAU2 PDCD2L MYH7B RPL28  
 RPS21 IFNGR2 ATP50 COX7B IDH3G

GOBPID Pvalue OddsRatio ExpCount Count Size Term

GO:0006415 7.52E-13 42.08700764 0.327451387 10 91  
 translational termination

GO:0006414 3.25E-12 35.84962406 0.377828524 10 105



STable4\_20PerPair

translational elongation

GO:0006614 3.25E-12 35.84962406 0.377828524 10 105  
 SRP-dependent cotranslational protein targeting to membrane

GO:0006613 3.58E-12 35.47371032 0.381426891 10 106  
 cotranslational protein targeting to membrane

GO:0045047 3.58E-12 35.47371032 0.381426891 10 106  
 protein targeting to ER

GO:0072599 3.58E-12 35.47371032 0.381426891 10 106  
 establishment of protein localization to endoplasmic reticulum

GO:0070972 1.06E-11 31.50573192 0.424607294 10 118  
 protein localization to endoplasmic reticulum

GO:0000184 1.16E-11 31.21450415 0.428205661 10 119  
 "nuclear-transcribed mRNA catabolic process, nonsense-mediated decay"

GO:0045333 6.78E-11 25.73412698 0.510968099 10 142

STable4\_20PerPair

cellular respiration

GO:0072594 1.23E-10 19.7480096 0.734066847 11 204  
 establishment of protein localization to organelle

GO:0019080 1.25E-10 24.07632557 0.543353401 10 151  
 viral genome expression

GO:0019083 1.25E-10 24.07632557 0.543353401 10 151  
 viral transcription

GO:0006401 1.30E-10 19.64483279 0.737665213 11 205 RNA  
 catabolic process

GO:0006413 1.33E-10 23.90509725 0.546951768 10 152  
 translational initiation

GO:0006612 1.42E-10 23.73626374 0.550550135 10 153  
 protein targeting to membrane

GO:0043624 1.42E-10 23.73626374 0.550550135 10 153

STable4\_20PerPair

cellular protein complex disassembly

GO:0043241 1.96E-10 22.92631918 0.568541969 10 158  
protein complex disassembly

GO:0000956 3.79E-10 21.32374963 0.608124005 10 169  
nuclear-transcribed mRNA catabolic process

GO:0019058 4.66E-10 17.29146341 0.831222753 11 231  
viral infectious cycle

GO:0034623 5.05E-10 20.66637631 0.62611584 10 174  
cellular macromolecular complex disassembly

GO:0006402 6.31E-10 20.16865079 0.640509307 10 178 mRNA  
catabolic process

GO:0032984 6.67E-10 20.04790082 0.644107674 10 179  
macromolecular complex disassembly

GO:0022415 1.63E-09 15.24635126 0.935575393 11 260

STable4\_20PerPair

viral reproductive process

|                                                        |          |             |             |    |     |
|--------------------------------------------------------|----------|-------------|-------------|----|-----|
| GO:0022904                                             | 1.67E-09 | 29.56818182 | 0.345443222 | 8  | 96  |
| respiratory electron transport chain                   |          |             |             |    |     |
| GO:0015980                                             | 9.26E-09 | 12.78287739 | 1.104698637 | 11 | 307 |
| energy derivation by oxidation of organic compounds    |          |             |             |    |     |
| GO:0022900                                             | 2.37E-08 | 20.5959596  | 0.482181164 | 8  | 134 |
| electron transport chain                               |          |             |             |    |     |
| GO:0071845                                             | 5.60E-08 | 12.27407021 | 1.021936198 | 10 | 284 |
| cellular component disassembly at cellular level       |          |             |             |    |     |
| GO:0022411                                             | 6.39E-08 | 12.09403905 | 1.036329666 | 10 | 288 |
| cellular component disassembly                         |          |             |             |    |     |
| GO:0006120                                             | 1.72E-07 | 49.30679478 | 0.129541208 | 5  | 36  |
| "mitochondrial electron transport, NADH to ubiquinone" |          |             |             |    |     |
| GO:0006091                                             | 2.74E-07 | 8.995847225 | 1.540101031 | 11 | 428 |

STable4\_20PerPair

generation of precursor metabolites and energy

|                                                        |          |             |             |    |     |     |
|--------------------------------------------------------|----------|-------------|-------------|----|-----|-----|
| GO:0016032                                             | 4.61E-07 | 8.511585366 | 1.62286347  | 11 | 451 |     |
| viral reproduction                                     |          |             |             |    |     |     |
| GO:0042773                                             | 6.78E-07 | 36.36524823 | 0.169123244 | 5  | 47  | ATP |
| synthesis coupled electron transport                   |          |             |             |    |     |     |
| GO:0042775                                             | 6.78E-07 | 36.36524823 | 0.169123244 | 5  | 47  |     |
| mitochondrial ATP synthesis coupled electron transport |          |             |             |    |     |     |
| GO:0033365                                             | 7.38E-07 | 8.093495935 | 1.702027541 | 11 | 473 |     |
| protein localization to organelle                      |          |             |             |    |     |     |
| GO:0006605                                             | 7.54E-07 | 8.075435916 | 1.705625908 | 11 | 474 |     |
| protein targeting                                      |          |             |             |    |     |     |
| GO:0006119                                             | 1.97E-06 | 28.79566439 | 0.20870528  | 5  | 58  |     |
| oxidative phosphorylation                              |          |             |             |    |     |     |

STable4\_20PerPair

SourceGene: CLEC5A(ENSG00000258227.2) "C-type lectin domain family 5, member A"

TargetGeneSet: WRAP73 THAP3 H6PD ZBTB17 KIF2C NOTCH2NL JTB  
 IQGAP3 CCDC19 ASPM KIF14 GALNT3 ILKAP FANCD2 CD38 GLRB KIF20A  
 CDC25C ARHGAP26 ZNF193 KIFC1 RP11 NDUFAF4 VIP CCT6A SND1 PBK  
 GINS4 GKAP1 CDK1 PBLD MKI67 U6 CDCA5 SIDT2 ZNF202 TROAP  
 PLBD2 DLGAP5 GSTZ1 ALKBH1 ARHGAP11A FMN1 BUB1B RAD51 NUSAP1  
 FANCI PRC1 SULT1A2 WWOX ATP6V0CP1 AURKB C17orf108 TOP2A  
 KIF18B PRR11 BRIP1 QRICH2 BIRC5 THOC1 ATP9B PIAS4 ZGLP1 IRF2BP1 TPX2  
 RP3 GTSE1 RBM3 KIF4A

| GOBPID     | Pvalue   | OddsRatio | ExpCount    | Count       | Size | Term                                 |
|------------|----------|-----------|-------------|-------------|------|--------------------------------------|
| GO:0000087 | 1.16E-12 |           | 14.51782946 | 1.51961802  | 16   | 360 M<br>phase of mitotic cell cycle |
| GO:0000280 | 1.10E-11 |           | 13.68105127 | 1.477406408 | 15   | 350<br>nuclear division              |
| GO:0007067 | 1.10E-11 |           | 13.68105127 | 1.477406408 | 15   | 350<br>mitosis                       |
| GO:0048285 | 2.43E-11 |           | 12.89191672 | 1.561829631 | 15   | 370<br>organelle fission             |

STable4\_20PerPair

|                                                   |          |             |             |    |     |      |
|---------------------------------------------------|----------|-------------|-------------|----|-----|------|
| GO:0051301<br>division                            | 3.59E-11 | 11.37940877 | 1.907964847 | 16 | 452 | cell |
| GO:0007017<br>microtubule-based process           | 6.77E-10 | 11.01184528 | 1.658916338 | 14 | 393 |      |
| GO:0007059<br>chromosome segregation              | 1.21E-07 | 16.30417381 | 0.590962563 | 8  | 140 |      |
| GO:0010564<br>regulation of cell cycle process    | 1.28E-07 | 8.521474261 | 1.747560722 | 12 | 414 |      |
| GO:0007346<br>regulation of mitotic cell cycle    | 4.96E-07 | 9.433848625 | 1.279011833 | 10 | 303 |      |
| GO:0034501<br>protein localization to kinetochore | 1.42E-06 | 248.0517241 | 0.025326967 | 3  | 6   |      |
| GO:0007018<br>microtubule-based movement          | 2.14E-06 | 13.68792867 | 0.599404885 | 7  | 142 |      |

STable4\_20PerPair

GO:0034502 2.40E-06 53.07848569 0.097086707 4 23  
 protein localization to chromosome

GO:0000819 2.53E-06 27.24734043 0.219500381 5 52  
 sister chromatid segregation

GO:0000910 2.68E-06 17.72975207 0.39678915 6 94  
 cytokinesis

GO:0030261 7.25E-06 38.76923077 0.126634835 4 30  
 chromosome condensation

GO:0000226 1.63E-05 8.171184848 1.135492353 8 269  
 microtubule cytoskeleton organization

Tissue: Heart\_Left\_Ventricle=>Whole\_Blood Type: cluster

SourceGene: DPP4(ENSG00000197635.5) dipeptidyl-peptidase 4

TargetGeneSet: RP11 CDCA8 KIF2C TNFSF13B CENPF NCAPH SMPD4  
 SPC25 FANCD2 CXCL3 CCNA2 CDC25C GFPT2 MCM7 EZH2 CDCA2 ESCO2 MCM4  
 DSCC1 ATAD2 TONSL ANP32B SMC2 ATP6V1G1 WDR34 MCM10 ZWINT CDK1



STable4\_20PerPair

|          |        |               |         |       |       |           |        |       |         |      |
|----------|--------|---------------|---------|-------|-------|-----------|--------|-------|---------|------|
| KIF11    | HELLS  | SMC3          | FEN1    | CDCA5 | H2AFX | CHEK1     | NCAPD3 | MPP2  | RACGAP1 | RFC3 |
| WDHD1    | DLGAP5 | CASC5         | WDR76   | KIF23 | FANCI | C15orf42  |        | RCCD1 | KIF22   |      |
| HIRIP3   | CDT1   | HSPB9         | PSMC3IP | TK1   | BIRC5 | TYMS      | SKA1   | UHRF1 | SPC24   |      |
| RNASEH2A |        | FKBP1A-SDCBP2 |         | TPX2  | AURKA | C21orf128 |        | CDC45 |         |      |

| GOBPID                           | Pvalue   | OddsRatio | ExpCount    | Count       | Size | Term     |
|----------------------------------|----------|-----------|-------------|-------------|------|----------|
| GO:0000280                       | 1.54E-30 |           | 42.19490255 | 1.380527299 | 28   | 350      |
| nuclear division                 |          |           |             |             |      |          |
| GO:0007067                       | 1.54E-30 |           | 42.19490255 | 1.380527299 | 28   | 350      |
| mitosis                          |          |           |             |             |      |          |
| GO:0000087                       | 3.44E-30 |           | 40.8948899  | 1.419970936 | 28   | 360 M    |
| phase of mitotic cell cycle      |          |           |             |             |      |          |
| GO:0048285                       | 7.48E-30 |           | 39.67090139 | 1.459414573 | 28   | 370      |
| organelle fission                |          |           |             |             |      |          |
| GO:0010564                       | 1.52E-22 |           | 26.11468531 | 1.632966577 | 24   | 414      |
| regulation of cell cycle process |          |           |             |             |      |          |
| GO:0051301                       | 1.22E-21 |           | 23.73152082 | 1.782852398 | 24   | 452 cell |
| division                         |          |           |             |             |      |          |
| GO:0006260                       | 2.23E-19 |           | 28.40361446 | 1.057089475 | 19   | 268 DNA  |
| replication                      |          |           |             |             |      |          |

STable4\_20PerPair

|                                   |          |             |             |    |     |      |
|-----------------------------------|----------|-------------|-------------|----|-----|------|
| GO:0007059                        | 4.51E-18 | 40.76857143 | 0.55221092  | 15 | 140 |      |
| chromosome segregation            |          |             |             |    |     |      |
| GO:0071156                        | 1.22E-16 | 24.34200405 | 1.04131202  | 17 | 264 |      |
| regulation of cell cycle arrest   |          |             |             |    |     |      |
| GO:0000075                        | 7.32E-16 | 24.46449385 | 0.954536018 | 16 | 242 | cell |
| cycle checkpoint                  |          |             |             |    |     |      |
| GO:0007050                        | 3.18E-14 | 16.95411932 | 1.45547021  | 17 | 369 | cell |
| cycle arrest                      |          |             |             |    |     |      |
| GO:0051329                        | 4.93E-14 | 16.47403315 | 1.494913847 | 17 | 379 |      |
| interphase of mitotic cell cycle  |          |             |             |    |     |      |
| GO:0051325                        | 6.94E-14 | 16.10864865 | 1.526468756 | 17 | 387 |      |
| interphase                        |          |             |             |    |     |      |
| GO:0045786                        | 4.99E-13 | 14.14035714 | 1.723686942 | 17 | 437 |      |
| negative regulation of cell cycle |          |             |             |    |     |      |
| GO:0006281                        | 9.33E-13 | 14.91539842 | 1.510691302 | 16 | 383 | DNA  |

| repair                                |          | STable4_20PerPair |             |    |     |         |
|---------------------------------------|----------|-------------------|-------------|----|-----|---------|
| GO:0000236                            | 9.91E-13 | 40.6212766        | 0.335270916 | 10 | 85  |         |
| mitotic prometaphase                  |          |                   |             |    |     |         |
| GO:0007017                            | 1.97E-11 | 13.24263039       | 1.550134939 | 15 | 393 |         |
| microtubule-based process             |          |                   |             |    |     |         |
| GO:0000226                            | 2.85E-11 | 16.31693892       | 1.061033838 | 13 | 269 |         |
| microtubule cytoskeleton organization |          |                   |             |    |     |         |
| GO:0006261                            | 8.90E-11 | 31.94196429       | 0.366825825 | 9  | 93  |         |
| DNA-dependent DNA replication         |          |                   |             |    |     |         |
| GO:0007346                            | 1.25E-10 | 14.369279         | 1.195142205 | 13 | 303 |         |
| regulation of mitotic cell cycle      |          |                   |             |    |     |         |
| GO:0000086                            | 2.04E-10 | 22.64210861       | 0.567988375 | 10 | 144 | G2/M    |
| transition of mitotic cell cycle      |          |                   |             |    |     |         |
| GO:0000070                            | 7.67E-10 | 47.84             | 0.193273822 | 7  | 49  | mitotic |
| sister chromatid segregation          |          |                   |             |    |     |         |

| GO ID                                                             | Value 1  | Value 2     | Value 3     | Value 4 | Value 5 | Value 6 |
|-------------------------------------------------------------------|----------|-------------|-------------|---------|---------|---------|
| GO:0007051<br>spindle organization                                | 8.18E-10 | 32.47619048 | 0.315549097 | 8       | 80      |         |
| GO:0000819<br>sister chromatid segregation                        | 1.18E-09 | 44.64133333 | 0.205106913 | 7       | 52      |         |
| GO:0010389<br>regulation of G2/M transition of mitotic cell cycle | 1.59E-09 | 70.44117647 | 0.118330911 | 6       | 30      |         |
| GO:0007052<br>mitotic spindle organization                        | 2.93E-09 | 62.60130719 | 0.130164002 | 6       | 33      |         |
| GO:0051052<br>regulation of DNA metabolic process                 | 4.22E-08 | 15.06038136 | 0.73365165  | 9       | 186     |         |
| GO:0071103<br>conformation change                                 | 4.85E-08 | 14.80625    | 0.745484742 | 9       | 189     | DNA     |
| GO:0006270<br>DNA-dependent DNA replication initiation            | 7.32E-08 | 60.07943144 | 0.110442184 | 5       | 28      |         |
| GO:0030261<br>chromosome condensation                             | 1.05E-07 | 55.26538462 | 0.118330911 | 5       | 30      |         |

STable4\_20PerPair

|                                                             |          |             |             |   |     |      |
|-------------------------------------------------------------|----------|-------------|-------------|---|-----|------|
| GO:0006323<br>packaging                                     | 1.40E-07 | 16.04391274 | 0.603487648 | 8 | 153 | DNA  |
| GO:0007076<br>mitotic chromosome condensation               | 1.51E-07 | 120.6289308 | 0.051276728 | 4 | 13  |      |
| GO:0006271<br>strand elongation involved in DNA replication | 2.03E-07 | 47.62931034 | 0.134108366 | 5 | 34  | DNA  |
| GO:0022616<br>strand elongation                             | 3.16E-07 | 43.15504808 | 0.145941457 | 5 | 37  | DNA  |
| GO:0000082<br>transition of mitotic cell cycle              | 6.25E-07 | 13.03921119 | 0.73365165  | 8 | 186 | G1/S |
| GO:0031570<br>integrity checkpoint                          | 1.00E-06 | 15.48139535 | 0.536433465 | 7 | 136 | DNA  |
| GO:0050000<br>chromosome localization                       | 1.24E-06 | 63.82685905 | 0.082831638 | 4 | 21  |      |
| GO:0051303<br>establishment of chromosome localization      | 1.24E-06 | 63.82685905 | 0.082831638 | 4 | 21  |      |

STable4\_20PerPair

|                                                                                        |          |             |             |   |     |     |
|----------------------------------------------------------------------------------------|----------|-------------|-------------|---|-----|-----|
| GO:0051320<br>phase                                                                    | 1.40E-06 | 14.67735294 | 0.564044011 | 7 | 143 | S   |
| GO:0000083<br>regulation of transcription involved in G1/S phase of mitotic cell cycle | 1.51E-06 | 60.27672956 | 0.086776002 | 4 | 22  |     |
| GO:0006275<br>regulation of DNA replication                                            | 1.58E-06 | 19.57318741 | 0.362881461 | 6 | 92  |     |
| GO:0010948<br>negative regulation of cell cycle process                                | 2.03E-06 | 18.69803922 | 0.378658916 | 6 | 96  |     |
| GO:0006302<br>double-strand break repair                                               | 2.89E-06 | 17.52205882 | 0.402325099 | 6 | 102 |     |
| GO:0000076<br>replication checkpoint                                                   | 6.85E-06 | 114.1825397 | 0.039443637 | 3 | 10  | DNA |
| GO:0007062<br>sister chromatid cohesion                                                | 7.20E-06 | 38.72237197 | 0.126219639 | 4 | 32  |     |
| GO:0070507<br>regulation of microtubule cytoskeleton organization                      | 1.19E-05 | 19.39734561 | 0.299771642 | 5 | 76  |     |

STable4\_20PerPair

|                                                              |          |             |             |   |     |      |
|--------------------------------------------------------------|----------|-------------|-------------|---|-----|------|
| GO:0010972                                                   | 1.25E-05 | 88.7962963  | 0.047332365 | 3 | 12  |      |
| negative regulation of G2/M transition of mitotic cell cycle |          |             |             |   |     |      |
| GO:0000084                                                   | 1.40E-05 | 13.11213235 | 0.528544737 | 6 | 134 | S    |
| phase of mitotic cell cycle                                  |          |             |             |   |     |      |
| GO:0000216                                                   | 1.44E-05 | 18.60706861 | 0.311604733 | 5 | 79  | M/G1 |
| transition of mitotic cell cycle                             |          |             |             |   |     |      |
| GO:0090307                                                   | 1.62E-05 | 79.91111111 | 0.051276728 | 3 | 13  |      |
| spindle assembly involved in mitosis                         |          |             |             |   |     |      |
| GO:0006310                                                   | 1.71E-05 | 9.836039604 | 0.824372016 | 7 | 209 | DNA  |
| recombination                                                |          |             |             |   |     |      |
| GO:0031576                                                   | 1.79E-05 | 30.10062893 | 0.157774548 | 4 | 40  | G2/M |
| transition checkpoint                                        |          |             |             |   |     |      |
| GO:0007018                                                   | 1.95E-05 | 12.33391003 | 0.560099647 | 6 | 142 |      |
| microtubule-based movement                                   |          |             |             |   |     |      |
| GO:0007098                                                   | 1.98E-05 | 29.28505864 | 0.161718912 | 4 | 41  |      |
| centrosome cycle                                             |          |             |             |   |     |      |

STable4\_20PerPair

Tissue: Heart\_Left\_Ventricle=>whole\_Blood      Type: cluster

SourceGene:      ENSG00000237298.1

TargetGeneSet:    CDCA8    CDC20    KIF2C    RWDD3    IQGAP3    TNFSF13B    RRM2  
 IGKJ5    IGKC    IGKJ4    IGKJ1    IGKV1-5    IGKV1-9    IGKV1-17    IGKV2-28  
 NCAPH    BUB1    ITM2C    HJURP    KIF15    CDC25A    CCNB1    RP11    MCM7    EZH2  
 MYOM2    MCM4    WDR34    MCM10    CDK1    ART5    CDCA5    POU2AF1    ABCB9    RFC3  
 DLGAP5    IFI27L2    IGHA2    IGHG2    IGHGP    IGHA1    IGHV6-1    BUB1B    CASC5    NUSAP1  
 FANCI    PKMYT1    PLK1    GINS2    AURKB    SPAG5    CDC6    TYMS    SKA1    PCNA    TPX2  
 MYBL2    CDC45    IGLV4-69    IGLV1-51    IGLV7-46    IGLV7-43  
 IGLV2-23    IGLV3-19    IGLV2-14    IGLV2-8    IGLL5    IGLJ1    IGLC1  
 DERL3

| GOBPID                      | Pvalue   | OddsRatio | ExpCount   | Count       | Size | Term |
|-----------------------------|----------|-----------|------------|-------------|------|------|
| GO:0000280                  | 7.03E-23 |           | 33.7114547 | 1.210988859 | 22   | 350  |
| nuclear division            |          |           |            |             |      |      |
| GO:0007067                  | 7.03E-23 |           | 33.7114547 | 1.210988859 | 22   | 350  |
| mitosis                     |          |           |            |             |      |      |
| GO:0000087                  | 1.31E-22 |           | 32.6908284 | 1.245588541 | 22   | 360  |
| phase of mitotic cell cycle |          |           |            |             |      | M    |



STable4\_20PerPair

|                                  |          |             |             |    |     |      |
|----------------------------------|----------|-------------|-------------|----|-----|------|
| GO:0048285                       | 2.38E-22 | 31.72885878 | 1.280188222 | 22 | 370 |      |
| organelle fission                |          |             |             |    |     |      |
| GO:0010564                       | 1.88E-18 | 23.70050761 | 1.432426822 | 20 | 414 |      |
| regulation of cell cycle process |          |             |             |    |     |      |
| GO:0007059                       | 9.82E-16 | 39.48967866 | 0.484395544 | 13 | 140 |      |
| chromosome segregation           |          |             |             |    |     |      |
| GO:0000082                       | 1.31E-15 | 32.17151163 | 0.643554079 | 14 | 186 | G1/S |
| transition of mitotic cell cycle |          |             |             |    |     |      |
| GO:0051329                       | 4.12E-15 | 19.97848652 | 1.311327936 | 17 | 379 |      |
| interphase of mitotic cell cycle |          |             |             |    |     |      |
| GO:0051301                       | 4.22E-15 | 18.10239055 | 1.563905612 | 18 | 452 | cell |
| division                         |          |             |             |    |     |      |
| GO:0051325                       | 5.81E-15 | 19.53538084 | 1.339007681 | 17 | 387 |      |
| interphase                       |          |             |             |    |     |      |

|                                       |          |             | STable4_20PerPair |    |     |      |
|---------------------------------------|----------|-------------|-------------------|----|-----|------|
| GO:0000075                            | 5.14E-14 | 24.17422027 | 0.837312297       | 14 | 242 | cell |
| cycle checkpoint                      |          |             |                   |    |     |      |
| GO:0071156                            | 1.71E-13 | 22.01266667 | 0.913431596       | 14 | 264 |      |
| regulation of cell cycle arrest       |          |             |                   |    |     |      |
| GO:0000236                            | 2.44E-13 | 47.75333333 | 0.294097294       | 10 | 85  |      |
| mitotic prometaphase                  |          |             |                   |    |     |      |
| GO:0051983                            | 1.27E-12 | 137.7400821 | 0.083039236       | 7  | 24  |      |
| regulation of chromosome segregation  |          |             |                   |    |     |      |
| GO:0007050                            | 1.60E-11 | 15.38685446 | 1.276728254       | 14 | 369 | cell |
| cycle arrest                          |          |             |                   |    |     |      |
| GO:0007017                            | 3.70E-11 | 14.3878628  | 1.35976749        | 14 | 393 |      |
| microtubule-based process             |          |             |                   |    |     |      |
| GO:0006260                            | 8.40E-11 | 17.44860197 | 0.927271469       | 12 | 268 | DNA  |
| replication                           |          |             |                   |    |     |      |
| GO:0000226                            | 8.77E-11 | 17.37947983 | 0.930731437       | 12 | 269 |      |
| microtubule cytoskeleton organization |          |             |                   |    |     |      |

STable4\_20PerPair

|                                                                          |          |             |             |    |     |     |
|--------------------------------------------------------------------------|----------|-------------|-------------|----|-----|-----|
| GO:0000083                                                               | 9.00E-11 | 122.5994318 | 0.0761193   | 6  | 22  |     |
| regulation of transcription involved in G1/S phase of mitotic cell cycle |          |             |             |    |     |     |
| GO:0045786                                                               | 1.51E-10 | 12.85080116 | 1.51200609  | 14 | 437 |     |
| negative regulation of cell cycle                                        |          |             |             |    |     |     |
| GO:0007346                                                               | 3.46E-10 | 15.31199132 | 1.048370355 | 12 | 303 |     |
| regulation of mitotic cell cycle                                         |          |             |             |    |     |     |
| GO:0007088                                                               | 5.96E-10 | 34.09761905 | 0.304477199 | 8  | 88  |     |
| regulation of mitosis                                                    |          |             |             |    |     |     |
| GO:0051783                                                               | 5.96E-10 | 34.09761905 | 0.304477199 | 8  | 88  |     |
| regulation of nuclear division                                           |          |             |             |    |     |     |
| GO:0006271                                                               | 1.57E-09 | 69.99837662 | 0.117638918 | 6  | 34  | DNA |
| strand elongation involved in DNA replication                            |          |             |             |    |     |     |
| GO:0033043                                                               | 2.12E-09 | 11.47063652 | 1.525845962 | 13 | 441 |     |
| regulation of organelle organization                                     |          |             |             |    |     |     |

STable4\_20PerPair

|                                                    |          |             |             |   |     |     |
|----------------------------------------------------|----------|-------------|-------------|---|-----|-----|
| GO:0022616<br>strand elongation                    | 2.70E-09 | 63.2111437  | 0.128018822 | 6 | 37  | DNA |
| GO:0034502<br>protein localization to chromosome   | 1.30E-08 | 88.78395062 | 0.079579268 | 5 | 23  |     |
| GO:0000070<br>mitotic sister chromatid segregation | 1.57E-08 | 45.53276956 | 0.16953844  | 6 | 49  |     |
| GO:0000084<br>phase of mitotic cell cycle          | 1.71E-08 | 21.57974301 | 0.463635735 | 8 | 134 | S   |
| GO:0000819<br>sister chromatid segregation         | 2.27E-08 | 42.55434783 | 0.179918345 | 6 | 52  |     |
| GO:0051320<br>phase                                | 2.86E-08 | 20.12839506 | 0.494775448 | 8 | 143 | S   |
| GO:0030261<br>chromosome condensation              | 5.39E-08 | 63.89333333 | 0.103799045 | 5 | 30  |     |

STable4\_20PerPair

|                                                                   |          |             |             |   |     |     |
|-------------------------------------------------------------------|----------|-------------|-------------|---|-----|-----|
| GO:000090<br>mitotic anaphase                                     | 6.15E-08 | 156.4456522 | 0.041519618 | 4 | 12  |     |
| GO:0051322<br>anaphase                                            | 1.24E-07 | 125.1391304 | 0.048439554 | 4 | 14  |     |
| GO:0071103<br>conformation change                                 | 2.48E-07 | 14.96448303 | 0.653933984 | 8 | 189 | DNA |
| GO:0008608<br>attachment of spindle microtubules to kinetochore   | 2.92E-07 | 96.24080268 | 0.058819459 | 4 | 17  |     |
| GO:0007051<br>spindle organization                                | 3.11E-07 | 26.40110565 | 0.276797453 | 6 | 80  |     |
| GO:0031577<br>spindle checkpoint                                  | 3.12E-07 | 43.13513514 | 0.145318663 | 5 | 42  |     |
| GO:0030071<br>regulation of mitotic metaphase/anaphase transition | 3.52E-07 | 41.99707602 | 0.148778631 | 5 | 43  |     |

STable4\_20PerPair

|                                                                                                |          |             |             |   |     |      |
|------------------------------------------------------------------------------------------------|----------|-------------|-------------|---|-----|------|
| GO:0031145                                                                                     | 3.88E-07 | 25.36717828 | 0.287177358 | 6 | 83  |      |
| anaphase-promoting complex-dependent proteasomal ubiquitin-dependent protein catabolic process |          |             |             |   |     |      |
| GO:0007091                                                                                     | 4.45E-07 | 39.89166667 | 0.155698568 | 5 | 45  |      |
| mitotic metaphase/anaphase transition                                                          |          |             |             |   |     |      |
| GO:0051313                                                                                     | 4.73E-07 | 83.39710145 | 0.065739395 | 4 | 19  |      |
| attachment of spindle microtubules to chromosome                                               |          |             |             |   |     |      |
| GO:0000086                                                                                     | 5.88E-07 | 16.94924461 | 0.498235416 | 7 | 144 | G2/M |
| transition of mitotic cell cycle                                                               |          |             |             |   |     |      |
| GO:0006958                                                                                     | 7.61E-07 | 35.44691358 | 0.172998408 | 5 | 50  |      |
| "complement activation, classical pathway"                                                     |          |             |             |   |     |      |
| GO:0006261                                                                                     | 7.64E-07 | 22.43573668 | 0.32177704  | 6 | 93  |      |
| DNA-dependent DNA replication                                                                  |          |             |             |   |     |      |
| GO:0034501                                                                                     | 7.74E-07 | 306.3404255 | 0.020759809 | 3 | 6   |      |
| protein localization to kinetochore                                                            |          |             |             |   |     |      |

STable4\_20PerPair

|                                                                                                                                         |          |             |             |   |     |      |
|-----------------------------------------------------------------------------------------------------------------------------------------|----------|-------------|-------------|---|-----|------|
| GO:0006323<br>packaging                                                                                                                 | 8.86E-07 | 15.89439312 | 0.52937513  | 7 | 153 | DNA  |
| GO:0006956<br>complement activation                                                                                                     | 2.44E-06 | 27.47701149 | 0.217977995 | 5 | 63  |      |
| GO:0002460<br>adaptive immune response based on somatic recombination of immune receptors built from immunoglobulin superfamily domains | 2.73E-06 | 13.31047848 | 0.626254238 | 7 | 181 |      |
| GO:0033205<br>cycle cytokinesis                                                                                                         | 2.83E-06 | 50.00347826 | 0.100339077 | 4 | 29  | cell |
| GO:0002455<br>humoral immune response mediated by circulating immunoglobulin                                                            | 2.85E-06 | 26.55740741 | 0.224897931 | 5 | 65  |      |
| GO:0006959<br>humoral immune response                                                                                                   | 3.75E-06 | 16.7927116  | 0.422116117 | 6 | 122 |      |
| GO:0007052<br>mitotic spindle organization                                                                                              | 4.82E-06 | 43.09445277 | 0.11417895  | 4 | 33  |      |

STable4\_20PerPair

|                                                                                |          |             |             |   |     |      |
|--------------------------------------------------------------------------------|----------|-------------|-------------|---|-----|------|
| GO:0002250                                                                     | 4.95E-06 | 12.11128698 | 0.685073697 | 7 | 198 |      |
| adaptive immune response                                                       |          |             |             |   |     |      |
| GO:0071173                                                                     | 5.45E-06 | 41.65507246 | 0.117638918 | 4 | 34  |      |
| spindle assembly checkpoint                                                    |          |             |             |   |     |      |
| GO:0034453                                                                     | 6.13E-06 | 40.3085554  | 0.121098886 | 4 | 35  |      |
| microtubule anchoring                                                          |          |             |             |   |     |      |
| GO:0071174                                                                     | 6.88E-06 | 39.04619565 | 0.124558854 | 4 | 36  |      |
| mitotic cell cycle spindle checkpoint                                          |          |             |             |   |     |      |
| GO:0051439                                                                     | 7.05E-06 | 21.80821918 | 0.269877517 | 5 | 78  |      |
| regulation of ubiquitin-protein ligase activity involved in mitotic cell cycle |          |             |             |   |     |      |
| GO:0043161                                                                     | 7.06E-06 | 11.44289662 | 0.723133347 | 7 | 209 |      |
| proteasomal ubiquitin-dependent protein catabolic process                      |          |             |             |   |     |      |
| GO:0000216                                                                     | 7.51E-06 | 21.51201201 | 0.273337485 | 5 | 79  | M/G1 |
| transition of mitotic cell cycle                                               |          |             |             |   |     |      |



STable4\_20PerPair

GO:0010498 8.75E-06 11.05418938 0.747353124 7 216  
 proteasomal protein catabolic process

GO:0072376 9.02E-06 20.66955267 0.28371739 5 82  
 protein activation cascade

GO:0000079 9.57E-06 20.4031339 0.287177358 5 83  
 regulation of cyclin-dependent protein kinase activity

GO:0007076 1.09E-05 91.85744681 0.044979586 3 13  
 mitotic chromosome condensation

GO:0010948 1.95E-05 17.47252747 0.332156944 5 96  
 negative regulation of cell cycle process

GO:0051438 1.95E-05 17.47252747 0.332156944 5 96  
 regulation of ubiquitin-protein ligase activity

Tissue: Heart\_Left\_Ventricle=>Whole\_Blood Type: cluster  
 SourceGene: ENSG00000260964.1  
 TargetGeneSet: CDC20 KIF2C RP11 DEPDC1 IQGAP3 APOA1BP CENPF NCAPH  
 Page 457

| Stable4_20PerPair                         |          |                                      |                                                     |                      |                   |                   |        |       |       |      |
|-------------------------------------------|----------|--------------------------------------|-----------------------------------------------------|----------------------|-------------------|-------------------|--------|-------|-------|------|
| CKAP2L                                    | DNAJC10  | PID1                                 | CAMK1                                               | KIF15                | CD86              | PLK4              | MARCH1 | CLCN3 | CCNB1 |      |
| PTTG1                                     | HLA-DPA1 |                                      | KIFC1                                               | EZH2                 | CDCA2             | FBXO43            | ENG    | ESPL1 | IKBIP |      |
| GPR183                                    | CEBPE    | DLGAP5                               | BUB1B                                               | TLN2                 | RCCD1             | NME4              | HN1L   | ABI3  | BRIP1 | SKA1 |
| CTD                                       | SUGP1    | WDR62                                | ARHGAP35                                            |                      | GINS1             | KCTD17            | ATXN10 | RP13  |       |      |
| GOBPID                                    | Pvalue   | OddsRatio                            | ExpCount                                            | Count                | Size              | Term              |        |       |       |      |
| GO:0000280                                | 350      | nuclear division                     | 1.07074260135991e-11                                | 18.7185101811112     |                   | 1.0172306414781   | 13     |       |       |      |
| GO:0007067                                | 350      | mitosis                              | 1.07074260135991e-11                                | 18.7185101811112     |                   | 1.0172306414781   | 13     |       |       |      |
| GO:0000087                                | 13       | 360                                  | M phase of mitotic cell cycle                       | 1.5248419935658e-11  | 18.1661532346219  | 1.04629437409176  |        |       |       |      |
| GO:0048285                                | 13       | 370                                  | organelle fission                                   | 2.14907455434004e-11 | 17.6447406548826  | 1.07535810670542  |        |       |       |      |
| GO:0007059                                | 9        | 140                                  | chromosome segregation                              | 1.97213566160475e-10 | 29.7251908396947  | 0.406892256591239 |        |       |       |      |
| GO:0051301                                | 11       | 452                                  | cell division                                       | 4.42700214233742e-08 | 11.2389730085583  | 1.31368071413743  |        |       |       |      |
| GO:0030071                                | 5        | 43                                   | regulation of mitotic metaphase/anaphase transition | 1.4385899176527e-07  | 51.1059743954481  | 0.124974050238738 |        |       |       |      |
| GO:0000236                                | 6        | 85                                   | mitotic prometaphase                                | 1.53329632772209e-07 | 30.2320675105485  | 0.24704172721611  |        |       |       |      |
| GO:0007091                                | 5        | 45                                   | mitotic metaphase/anaphase transition               | 1.81811730010386e-07 | 48.5439189189189  | 0.13078679676147  |        |       |       |      |
| GO:0000070                                | 5        | 49                                   | mitotic sister chromatid segregation                | 2.81351512788933e-07 | 44.1185503685504  | 0.142412289806934 |        |       |       |      |
| GO:0000819                                | 5        | 52                                   | sister chromatid segregation                        | 3.81014127946705e-07 | 41.2938470385279  | 0.151131409591032 |        |       |       |      |
| GO:0007017                                | 393      | microtubule-based process            | 1.49505621429259e-06                                | 9.9609375            | 1.14220469171684  | 9                 |        |       |       |      |
| GO:0071174                                | 4        | 36                                   | mitotic cell cycle spindle checkpoint               | 3.39342499763601e-06 | 47.2927631578947  | 0.104629437409176 |        |       |       |      |
| GO:0033043                                | 441      | regulation of organelle organization | 3.85331021273676e-06                                | 8.82386363636364     | 1.2817106082624   | 9                 |        |       |       |      |
| GO:0007088                                | 88       | regulation of mitosis                | 5.31813666563279e-06                                | 23.324649951156      | 0.255760847000208 | 5                 |        |       |       |      |
| GO:0051783                                | 88       | regulation of nuclear division       | 5.31813666563279e-06                                | 23.324649951156      | 0.255760847000208 | 5                 |        |       |       |      |
| GO:0031577                                | 42       | spindle checkpoint                   | 6.36721579592055e-06                                | 39.808864265928      | 0.122067676977372 | 4                 |        |       |       |      |
| Tissue: whole_Blood=>Heart_Left_Ventricle |          |                                      |                                                     |                      | Type: asymmetric  |                   |        |       |       |      |

SourceGene: FTH1P25(ENSG00000232792.1) "ferritin, heavy polypeptide 1  
pseudogene 25"

TargetGeneSet: LPTM5 CD53 CTSS LCP2 DOK3 DEFA6 CARD9 SPI1  
MS4A7 FERMT3 PTPN6 RP11 SELPLG KIAA1737 PLCB2 CORO1A SCIMP  
ACAP1 HMHA1 VAV1 STXBP2 IFI30 TYROBP CD37 LILRB1 HCK CYTH4  
SASH3

| GOBPID                  | Pvalue   | OddsRatio | ExpCount    | Count       | Size | Term |
|-------------------------|----------|-----------|-------------|-------------|------|------|
| GO:0002252              | 3.90E-06 |           | 13.65393695 | 0.694484811 | 7    | 386  |
| immune effector process |          |           |             |             |      |      |

GO:0050870      1.18E-05      20.45180723      0.30766037      5      171  
 positive regulation of T cell activation

GO:0002694      1.81E-05      13.43809524      0.577537887      6      321  
 regulation of leukocyte activation

Tissue: whole\_Blood=>Heart\_Left\_Ventricle      Type: asymmetric

SourceGene:      NF1(ENSG00000196712.10) neurofibromin 1

TargetGeneSet:    RP4      FLG2      CRCT1      LCE1A      IVL      NPR1      SHE      RAB25      MALL  
 SPC25    RNU5B-3P      DKK2      RP11      BAG2      INTS10    SLURP1    ZCCHC7    SH2D3C  
 EMILIN3    TRIM29    ESAM      KRT5      KRT2      KRT1      KRT77    DCD      MUCL1      SCEL  
 CLEC14A    PRKCH      IFI27      CHST14    FES      TNS4      KRT10    KRT15    TK1      DSC2  
 SERPINB5      SBSN      RASIP1      KLK5      SMOX      FAM83C

GOBPID    Pvalue    OddsRatio      ExpCount      Count    Size    Term

GO:0008544      3.30E-10      22.94574899      0.622448273      10      257  
 epidermis development

GO:0030216      8.99E-08      33.68652038      0.227665905      6      94  
 keratinocyte differentiation

GO:0009913      2.30E-07      28.47214854      0.266417549      6      110  
 epidermal cell differentiation

Tissue: whole\_Blood=>Heart\_Left\_Ventricle      Type: asymmetric

SourceGene:      OSBP2(ENSG00000184792.11)      oxysterol binding protein 2

STable4\_20PerPair

TargetGeneSet: THAP3 ATP6V0B IQGAP3 RP11 AUP1 ILKAP FANCD2 ARHGAP31-AS1  
 ZCCHC9 GTF2H4 HCG22 ZNHIT1 FAM115B TM2D2 ARMC1 WDR67 CD72 TLN1 MELK  
 MRPS2 C9orf142 C10orf71 MKI67 IGF2 ACER3 TROAP DDIT3  
 SLC7A7 BRMS1L SAMD4A BUB1B RAD51 KIF23 STARD5 FANCI CCDC78 NARFL E4F1  
 COX4NB SPATA2L DERL2 SCO1 TOP2A KIF18B BRIP1 ABHD8 LGALS4 BCAT2 CTB  
 FKBP1A-SDCBP2 SLMO2 APOBEC3B SGSM3 GTSE1

GOBPID Pvalue OddsRatio ExpCount Count Size Term

Tissue: Heart\_Left\_Ventricle=>whole\_Blood Type: asymmetric

SourceGene: PIK3R2(ENSG00000105647.8) "phosphoinositide-3-kinase, regulatory subunit 2"

TargetGeneSet: CDCA8 KIF2C PKLR LZTFL1 PHF7 BMP2K TRIP13 CTD  
 CDC25C HLA-DRB5 HLA-DRB1 HLA-DQB1 KIFC1 NDUFAF4 CD164 PKIB  
 PCMT1 WIPI2 RP11 MRPL50 ZNF32-AS2 SIGIRR CDCA3 ESPL1 CHST11 RFC3  
 SLAIN1 CLYBL PCID2 GSTZ1 HMGN2P5 KIAA0101 CLN6 BLM CCDC101  
 ITGAM PITPNM3 BRIP1 TK1 TYMS CIRBP SPC24 TNPO2 RASAL3 JAK3  
 PRR24 FUZ ZNF446 CDC45 RP4 RIBC1 CETN2

GOBPID Pvalue OddsRatio ExpCount Count Size Term

GO:0051301 3.80E-06 8.867310948 1.282402602 9 452 cell division

GO:0000280 5.20E-06 9.972000709 0.993010864 8 350 nuclear division

GO:0007067 5.20E-06 9.972000709 0.993010864 8 350 mitosis

STable4\_20PerPair

GO:0000087 6.39E-06 9.681818182 1.021382603 8 360 M  
 phase of mitotic cell cycle

GO:0048285 7.81E-06 9.407667839 1.049754342 8 370  
 organelle fission

Tissue: Heart\_Left\_Ventricle=>whole\_Blood Type: asymmetric

SourceGene: RCAN3(ENSG00000117602.6) RCAN family member 3

TargetGeneSet: FCRL5 RP11 SH2D6 SULT1C2 BANK1 GALNTL6 RSPH9 BLK PAX5  
 ACTR1A GYLTL1B MS4A1 CD27 DTX1 TCL1B KIAA0125 IGHV1-2 IGHV1-24  
 PLA2G4B CD19 SPDYE4 HDAC5 CD79B FCER2 RHPN2 CD79A SPIB IGLC5  
 TNFRSF13C TCEAL6

GOBPID Pvalue OddsRatio ExpCount Count Size Term

GO:0042113 8.28E-08 36.43367347 0.232925057 6 153 B  
 cell activation

GO:0046649 2.39E-06 15.33974961 0.659193135 7 433  
 lymphocyte activation

Tissue: whole\_Blood=>Heart\_Left\_Ventricle Type: asymmetric

SourceGene: RP11-1033H12.3(ENSG00000258440.1)

TargetGeneSet: RPL22 RPL11 AK2 RPL5 RP11 PSMA5 ACP1 SLC4A1AP  
 UBC RNF181 RPL15 C3orf26 RPL24 RPL35A BTF3 PCDHGA1 CTB RPS14  
 MRPS12 ATP6V1F UBE3C PPP2CB RPS20 RPL7 ENY2 GLRX3 RPS13 CRYAB  
 STRAP PSMC6 PSMC1 AHNAK2 RPL26 KCNJ12 PSMB3 RPL17 DNAJC7 SLMO1  
 C18orf21 RPL18 SNRPB EEF1B2P3 RPS23P8

GOBPID Pvalue OddsRatio ExpCount Count Size Term

GO:0006415 1.13024861698362e-22 124.147186147186 0.220399972320255  
 14 91 translational termination

GO:0006414 9.52400953644563e-22 104.945054945055 0.254307660369525  
 14 105 translational elongation

GO:0006614 9.52400953644563e-22 104.945054945055 0.254307660369525  
 14 105 SRP-dependent cotranslational protein targeting to membrane

GO:0006613 1.0958337582712e-21 103.797101449275 0.25672963808733  
 14 106 cotranslational protein targeting to membrane

GO:0045047 1.0958337582712e-21 103.797101449275 0.25672963808733  
 14 106 protein targeting to ER

Stable4\_20PerPair

|            |                      |                                                                     |                   |        |
|------------|----------------------|---------------------------------------------------------------------|-------------------|--------|
| GO:0072599 | 1.0958337582712e-21  | 103.797101449275                                                    | 0.25672963808733  |        |
| 14         | 106                  | establishment of protein localization to endoplasmic reticulum      |                   |        |
| GO:0070972 | 5.32068668405306e-21 | 91.7435897435897                                                    | 0.28579337070099  |        |
| 14         | 118                  | protein localization to endoplasmic reticulum                       |                   |        |
| GO:0000184 | 6.02187460500713e-21 | 90.8634920634921                                                    | 0.288215348418795 |        |
| 14         | 119                  | nuclear-transcribed mRNA catabolic process, nonsense-mediated decay |                   |        |
| GO:0019080 | 1.92429404839666e-19 | 69.4841849148418                                                    | 0.365718635388554 |        |
| 14         | 151                  | viral genome expression                                             |                   |        |
| GO:0019083 | 1.92429404839666e-19 | 69.4841849148418                                                    | 0.365718635388554 |        |
| 14         | 151                  | viral transcription                                                 |                   |        |
| GO:0006413 | 2.11661143776567e-19 | 68.975845410628                                                     | 0.368140613106359 | 14     |
| 152        |                      | translational initiation                                            |                   |        |
| GO:0006612 | 2.32660648605977e-19 | 68.4748201438849                                                    | 0.370562590824164 |        |
| 14         | 153                  | protein targeting to membrane                                       |                   |        |
| GO:0043624 | 2.32660648605977e-19 | 68.4748201438849                                                    | 0.370562590824164 |        |
| 14         | 153                  | cellular protein complex disassembly                                |                   |        |
| GO:0043241 | 3.6978387346578e-19  | 66.0740740740741                                                    | 0.382672479413189 |        |
| 14         | 158                  | protein complex disassembly                                         |                   |        |
| GO:0000956 | 9.72417227373162e-19 | 61.3376344086021                                                    | 0.409314234309044 |        |
| 14         | 169                  | nuclear-transcribed mRNA catabolic process                          |                   |        |
| GO:0034623 | 1.47654099777653e-18 | 59.4                                                                | 0.421424122898069 | 14 174 |
|            |                      | cellular macromolecular complex disassembly                         |                   |        |
| GO:0016032 | 1.57149853098814e-18 | 34.1929085722049                                                    | 1.09231195073005  |        |
| 18         | 451                  | viral reproduction                                                  |                   |        |
| GO:0006402 | 2.04378168080614e-18 | 57.9349593495935                                                    | 0.431112033769289 |        |
| 14         | 178                  | mRNA catabolic process                                              |                   |        |
| GO:0032984 | 2.21415407274473e-18 | 57.57979797979798                                                   | 0.433534011487094 | 14     |
| 179        |                      | macromolecular complex disassembly                                  |                   |        |
| GO:0072594 | 1.42425792613121e-17 | 49.9157894736842                                                    | 0.494083454432219 |        |
| 14         | 204                  | establishment of protein localization to organelle                  |                   |        |
| GO:0006401 | 1.52655504908356e-17 | 49.6509598603839                                                    | 0.496505432150024 |        |
| 14         | 205                  | RNA catabolic process                                               |                   |        |
| GO:0019058 | 8.25737690205258e-17 | 43.6221198156682                                                    | 0.559476852812954 |        |
| 14         | 231                  | viral infectious cycle                                              |                   |        |
| GO:0022415 | 4.34881362463966e-16 | 38.4010840108401                                                    | 0.629714206629299 |        |
| 14         | 260                  | viral reproductive process                                          |                   |        |
| GO:0071845 | 1.49317566910718e-15 | 34.9283950617284                                                    | 0.687841671856619 |        |
| 14         | 284                  | cellular component disassembly at cellular level                    |                   |        |
| GO:0022411 | 1.81445639266429e-15 | 34.4087591240876                                                    | 0.697529582727839 |        |
| 14         | 288                  | cellular component disassembly                                      |                   |        |
| GO:0033365 | 1.65509849938895e-12 | 20.2716049382716                                                    | 1.14559546052176  |        |
| 14         | 473                  | protein localization to organelle                                   |                   |        |
| GO:0006605 | 1.70309181669195e-12 | 20.2260869565217                                                    | 1.14801743823957  |        |
| 14         | 474                  | protein targeting                                                   |                   |        |
| GO:0042273 | 4.83997390650977e-11 | 343.071428571429                                                    | 0.02906373261366  |        |
| 5          | 12                   | ribosomal large subunit biogenesis                                  |                   |        |
| GO:0022613 | 4.99760970587808e-08 | 19.3876088069636                                                    | 0.544944986506124 |        |
| 8          | 225                  | ribonucleoprotein complex biogenesis                                |                   |        |
| GO:0071843 | 7.97107515811943e-08 | 18.1946448613115                                                    | 0.578852674555394 |        |
| 8          | 239                  | cellular component biogenesis at cellular level                     |                   |        |
| GO:0006364 | 1.64612882806908e-07 | 30.2280084447572                                                    | 0.25188568265172  |        |
| 6          | 104                  | rRNA processing                                                     |                   |        |
| GO:0016072 | 2.29963934403525e-07 | 28.4721485411141                                                    | 0.26641754895855  |        |
| 6          | 110                  | rRNA metabolic process                                              |                   |        |
| GO:0006977 | 4.97362279991076e-07 | 39.2213114754098                                                    | 0.15985052937513  |        |
| 5          | 66                   | DNA damage response, signal transduction by p53 class mediator      |                   |        |
|            |                      | resulting in cell cycle arrest                                      |                   |        |
| GO:0072413 | 4.97362279991076e-07 | 39.2213114754098                                                    | 0.15985052937513  |        |
| 5          | 66                   | signal transduction involved in mitotic cell cycle checkpoint       |                   |        |
| GO:0072431 | 4.97362279991076e-07 | 39.2213114754098                                                    | 0.15985052937513  |        |
| 5          | 66                   | signal transduction involved in mitotic cell cycle G1/S transition  |                   |        |
|            |                      | DNA damage checkpoint                                               |                   |        |
| GO:0072474 | 4.97362279991076e-07 | 39.2213114754098                                                    | 0.15985052937513  |        |

Stable4\_20PerPair

|            |     |                                                                                                 |                  |                   |
|------------|-----|-------------------------------------------------------------------------------------------------|------------------|-------------------|
| 5          | 66  | signal transduction involved in mitotic cell cycle G1/S checkpoint                              |                  |                   |
| GO:0051436 |     | 5.36541489798949e-07                                                                            | 38.5860215053763 | 0.162272507092935 |
| 5          | 67  | negative regulation of ubiquitin-protein ligase activity involved in mitotic cell cycle         |                  |                   |
| GO:0072401 |     | 5.36541489798949e-07                                                                            | 38.5860215053763 | 0.162272507092935 |
| 5          | 67  | signal transduction involved in DNA integrity checkpoint                                        |                  |                   |
| GO:0072404 |     | 5.36541489798949e-07                                                                            | 38.5860215053763 | 0.162272507092935 |
| 5          | 67  | signal transduction involved in G1/S transition checkpoint                                      |                  |                   |
| GO:0072422 |     | 5.36541489798949e-07                                                                            | 38.5860215053763 | 0.162272507092935 |
| 5          | 67  | signal transduction involved in DNA damage checkpoint                                           |                  |                   |
| GO:0072395 |     | 5.78121366136425e-07                                                                            | 37.9708994708995 | 0.16469448481074  |
| 5          | 68  | signal transduction involved in cell cycle checkpoint                                           |                  |                   |
| GO:0051352 |     | 7.70609308533534e-07                                                                            | 35.6940298507463 | 0.17438239568196  |
| 5          | 72  | negative regulation of ligase activity                                                          |                  |                   |
| GO:0051437 |     | 7.70609308533534e-07                                                                            | 35.6940298507463 | 0.17438239568196  |
| 5          | 72  | positive regulation of ubiquitin-protein ligase activity involved in mitotic cell cycle         |                  |                   |
| GO:0051444 |     | 7.70609308533534e-07                                                                            | 35.6940298507463 | 0.17438239568196  |
| 5          | 72  | negative regulation of ubiquitin-protein ligase activity                                        |                  |                   |
| GO:0031571 |     | 8.25839238324015e-07                                                                            | 35.1666666666667 | 0.176804373399765 |
| 5          | 73  | mitotic cell cycle G1/S transition DNA damage checkpoint                                        |                  |                   |
| GO:0002479 |     | 9.45662089990647e-07                                                                            | 34.1571428571429 | 0.181648328835375 |
| 5          | 75  | antigen processing and presentation of exogenous peptide antigen via MHC class I, TAP-dependent |                  |                   |
| GO:0051439 |     | 1.15070253195326e-06                                                                            | 32.7465753424658 | 0.18891426198879  |
| 5          | 78  | regulation of ubiquitin-protein ligase activity involved in mitotic cell cycle                  |                  |                   |
| GO:0000216 |     | 1.22632538943352e-06                                                                            | 32.3018018018018 | 0.191336239706595 |
| 5          | 79  | M/G1 transition of mitotic cell cycle                                                           |                  |                   |
| GO:0042590 |     | 1.22632538943352e-06                                                                            | 32.3018018018018 | 0.191336239706595 |
| 5          | 79  | antigen processing and presentation of exogenous peptide antigen via MHC class I                |                  |                   |
| GO:0071158 |     | 1.3058151925104e-06                                                                             | 31.8688888888889 | 0.1937582174244 5 |
| 80         |     | positive regulation of cell cycle arrest                                                        |                  |                   |
| GO:0042254 |     | 1.37762246487303e-06                                                                            | 20.6505907885218 | 0.360874679952944 |
| 6          | 149 | ribosome biogenesis                                                                             |                  |                   |
| GO:0031575 |     | 1.47696702907015e-06                                                                            | 31.0367965367965 | 0.19860217286001  |
| 5          | 82  | mitotic cell cycle G1/S transition checkpoint                                                   |                  |                   |
| GO:0051443 |     | 1.47696702907015e-06                                                                            | 31.0367965367965 | 0.19860217286001  |
| 5          | 82  | positive regulation of ubiquitin-protein ligase activity                                        |                  |                   |
| GO:0002478 |     | 1.56892269816487e-06                                                                            | 30.6367521367521 | 0.201024150577815 |
| 5          | 83  | antigen processing and presentation of exogenous peptide antigen                                |                  |                   |
| GO:0031145 |     | 1.56892269816487e-06                                                                            | 30.6367521367521 | 0.201024150577815 |
| 5          | 83  | anaphase-promoting complex-dependent proteasomal ubiquitin-dependent protein catabolic process  |                  |                   |
| GO:0019884 |     | 1.76635167310192e-06                                                                            | 29.8666666666667 | 0.205868106013425 |
| 5          | 85  | antigen processing and presentation of exogenous antigen                                        |                  |                   |
| GO:0051351 |     | 1.87213794113529e-06                                                                            | 29.4958847736626 | 0.20829008373123  |
| 5          | 86  | positive regulation of ligase activity                                                          |                  |                   |
| GO:0071779 |     | 1.87213794113529e-06                                                                            | 29.4958847736626 | 0.20829008373123  |
| 5          | 86  | G1/S transition checkpoint                                                                      |                  |                   |
| GO:0000209 |     | 2.16420693584304e-06                                                                            | 19.0358175750834 | 0.389938412566604 |
| 6          | 161 | protein polyubiquitination                                                                      |                  |                   |
| GO:0031397 |     | 2.61623622572555e-06                                                                            | 27.4501915708812 | 0.22282195003806  |
| 5          | 92  | negative regulation of protein ubiquitination                                                   |                  |                   |
| GO:0051438 |     | 3.22934745288586e-06                                                                            | 26.2362637362637 | 0.23250986090928  |
| 5          | 96  | regulation of ubiquitin-protein ligase activity                                                 |                  |                   |
| GO:0002474 |     | 3.7591586958813e-06                                                                             | 25.3936170212766 | 0.239775794062695 |
| 5          | 99  | antigen processing and presentation of peptide antigen via MHC class I                          |                  |                   |
| GO:2000045 |     | 3.7591586958813e-06                                                                             | 25.3936170212766 | 0.239775794062695 |
| 5          | 99  | regulation of G1/S transition of mitotic cell cycle                                             |                  |                   |
| GO:0051340 |     | 3.95015569920992e-06                                                                            | 25.1245614035088 | 0.2421977717805 5 |

STable4\_20PerPair

|                                           |                               |                                                                      |                  |                  |          |                   |         |                   |       |
|-------------------------------------------|-------------------------------|----------------------------------------------------------------------|------------------|------------------|----------|-------------------|---------|-------------------|-------|
| 100                                       | regulation of ligase activity |                                                                      |                  |                  |          |                   |         |                   |       |
| GO:0034660                                |                               | 4.51600848980766e-06                                                 | 12.7140287769784 |                  |          |                   |         | 0.690263649574424 |       |
| 7                                         | 285                           | ncRNA metabolic process                                              |                  |                  |          |                   |         |                   |       |
| GO:0048002                                |                               | 5.76797129387682e-06                                                 | 23.1601941747573 |                  |          |                   |         | 0.26157359352294  |       |
| 5                                         | 108                           | antigen processing and presentation of peptide antigen               |                  |                  |          |                   |         |                   |       |
| GO:0034470                                |                               | 7.57338935750658e-06                                                 | 15.1674369001066 |                  |          |                   |         | 0.484395543560999 |       |
| 6                                         | 200                           | ncRNA processing                                                     |                  |                  |          |                   |         |                   |       |
| GO:0030330                                |                               | 8.53563514448506e-06                                                 | 21.2857142857143 |                  |          |                   |         | 0.283371392983185 |       |
| 5                                         | 117                           | DNA damage response, signal transduction by p53 class mediator       |                  |                  |          |                   |         |                   |       |
| GO:0043161                                |                               | 9.74212639797436e-06                                                 | 14.4858162051979 |                  |          |                   |         | 0.506193343021244 |       |
| 6                                         | 209                           | proteasomal ubiquitin-dependent protein catabolic process            |                  |                  |          |                   |         |                   |       |
| GO:0006521                                |                               | 1.03962421825924e-05                                                 | 34.9677419354839 |                  |          |                   |         | 0.138052729914885 |       |
| 4                                         | 57                            | regulation of cellular amino acid metabolic process                  |                  |                  |          |                   |         |                   |       |
| GO:0072331                                |                               | 1.08936063853011e-05                                                 | 20.1949152542373 |                  |          |                   |         | 0.297903259290015 |       |
| 5                                         | 123                           | signal transduction by p53 class mediator                            |                  |                  |          |                   |         |                   |       |
| GO:0010498                                |                               | 1.17561679581293e-05                                                 | 13.9960591133005 |                  |          |                   |         | 0.523147187045879 |       |
| 6                                         | 216                           | proteasomal protein catabolic process                                |                  |                  |          |                   |         |                   |       |
| GO:0031398                                |                               | 1.27289428155871e-05                                                 | 19.5273224043716 |                  |          |                   |         | 0.307591170161234 |       |
| 5                                         | 127                           | positive regulation of protein ubiquitination                        |                  |                  |          |                   |         |                   |       |
| GO:0000077                                |                               | 1.42573752894829e-05                                                 | 19.0546666666667 |                  |          |                   |         | 0.31485710331465  |       |
| 5                                         | 130                           | DNA damage checkpoint                                                |                  |                  |          |                   |         |                   |       |
| GO:0000084                                |                               | 1.65141134739317e-05                                                 | 18.4586563307494 |                  |          |                   |         | 0.32454501418587  |       |
| 5                                         | 134                           | S phase of mitotic cell cycle                                        |                  |                  |          |                   |         |                   |       |
| GO:0031570                                |                               | 1.77421908200658e-05                                                 | 18.1743002544529 |                  |          |                   |         | 0.329388969621479 |       |
| 5                                         | 136                           | DNA integrity checkpoint                                             |                  |                  |          |                   |         |                   |       |
| GO:0007093                                |                               | 1.97166089152038e-05                                                 | 17.7636815920398 |                  |          |                   |         | 0.336654902774894 |       |
| 5                                         | 139                           | mitotic cell cycle checkpoint                                        |                  |                  |          |                   |         |                   |       |
| Tissue: whole_Blood=>Heart_Left_Ventricle |                               | Type: asymmetric                                                     |                  |                  |          |                   |         |                   |       |
| SourceGene:                               |                               | RP11-166P13.3(ENSG00000263004.1)                                     |                  |                  |          |                   |         |                   |       |
| TargetGeneSet:                            |                               | CTNNBIP1                                                             | RSG1             | WBP1             | FUCA1    | PIIE              | UROD    | RP11              |       |
| ZFYVE9                                    | ZRANB2                        | MTF2                                                                 | PSMA5            | CERS2            | PSMB4    | C1orf61           | SMG7    | GS1               | RBBP5 |
| KIF3C                                     | GCFC2                         | RNF181                                                               | POU3F3           | PSMD14           | PSMD6    | PSMC1P1           | C3orf17 | GK5               | NMD3  |
| YEATS2                                    | GRIA2                         | GPM6A                                                                | BRD9             | WDR70            | PAPD4    | YTHDC2            | CTB     | PDLIM7            | UFL1  |
| PSMB1                                     | AMPH                          | CDK13                                                                | UBE3C            | PYCR1            | KIAA2026 |                   | NFIB    | XPA               | FPGS  |
| NOXA1                                     | TAF3                          | DLG5                                                                 | BTAF1            | PSMD13           | OR52E8   | ZNF143            | YIF1A   | C12orf5           | AKAP3 |
| STRAP                                     | PSG1                          | ATF7                                                                 | MVK              | IFT81            | VPS29    | PABPC3            | EXOSC8  | UCHL3             | FBXL3 |
| PSMC6                                     | PSMC1                         | VRK1                                                                 | RPL4             | COMMD4           | SNX33    | WDR61             | FBXL16  | CREBBP            | MAZ   |
| SULT1A3                                   | SALL1                         | TMEM208                                                              | CTCF             | ZFHX3            | ZBTB4    | C17orf39          |         | RPL17P43          |       |
| KCNJ12                                    | WIPF2                         | G6PC3                                                                | GFAP             | ANKRD40          | TUBD1    | MAP3K3            | CHMP6   | MIR133A1          |       |
| C19orf6                                   | ZBTB7A                        | NCAN                                                                 | ZNF461           | CTU1             | ZNF580   | SNRPB             | ITPA    | PYGB              | SLPI  |
| ZNF512B                                   | CBS                           | TCF20                                                                | RBM3             | MAGED1           | PABPC1P3 |                   | BCORL1  |                   |       |
| GOBPID                                    | Pvalue                        | OddsRatio                                                            | ExpCount         | Count            | Size     | Term              |         |                   |       |
| GO:0006521                                |                               | 2.53435722653352e-09                                                 |                  | 27.8134110787172 |          | 0.362881461490554 |         |                   |       |
| 8                                         | 57                            | regulation of cellular amino acid metabolic process                  |                  |                  |          |                   |         |                   |       |
| GO:0031397                                |                               | 6.49469187792333e-09                                                 |                  | 18.6506024096386 |          | 0.585703411528614 |         |                   |       |
| 9                                         | 92                            | negative regulation of protein ubiquitination                        |                  |                  |          |                   |         |                   |       |
| GO:0006977                                |                               | 8.40770360980823e-09                                                 |                  | 23.4827586206897 |          | 0.420178534357484 |         |                   |       |
| 8                                         | 66                            | DNA damage response, signal transduction by p53 class mediator       |                  |                  |          |                   |         |                   |       |
| resulting in cell cycle arrest            |                               |                                                                      |                  |                  |          |                   |         |                   |       |
| GO:0072413                                |                               | 8.40770360980823e-09                                                 |                  | 23.4827586206897 |          | 0.420178534357484 |         |                   |       |
| 8                                         | 66                            | signal transduction involved in mitotic cell cycle checkpoint        |                  |                  |          |                   |         |                   |       |
| GO:0072431                                |                               | 8.40770360980823e-09                                                 |                  | 23.4827586206897 |          | 0.420178534357484 |         |                   |       |
| 8                                         | 66                            | signal transduction involved in mitotic cell cycle G1/S transition   |                  |                  |          |                   |         |                   |       |
| DNA damage checkpoint                     |                               |                                                                      |                  |                  |          |                   |         |                   |       |
| GO:0072474                                |                               | 8.40770360980823e-09                                                 |                  | 23.4827586206897 |          | 0.420178534357484 |         |                   |       |
| 8                                         | 66                            | signal transduction involved in mitotic cell cycle G1/S checkpoint   |                  |                  |          |                   |         |                   |       |
| GO:0051436                                |                               | 9.49838521246666e-09                                                 |                  | 23.0831315577078 |          | 0.426544875787143 |         |                   |       |
| 8                                         | 67                            | negative regulation of ubiquitin-protein ligase activity involved in |                  |                  |          |                   |         |                   |       |
| mitotic cell cycle                        |                               |                                                                      |                  |                  |          |                   |         |                   |       |
| GO:0072401                                |                               | 9.49838521246666e-09                                                 |                  | 23.0831315577078 |          | 0.426544875787143 |         |                   |       |
| 8                                         | 67                            | signal transduction involved in DNA integrity checkpoint             |                  |                  |          |                   |         |                   |       |
| GO:0072404                                |                               | 9.49838521246666e-09                                                 |                  | 23.0831315577078 |          | 0.426544875787143 |         |                   |       |
| 8                                         | 67                            | signal transduction involved in G1/S transition checkpoint           |                  |                  |          |                   |         |                   |       |



Stable4\_20PerPair

|            |                                                                                                 |                         |                   |
|------------|-------------------------------------------------------------------------------------------------|-------------------------|-------------------|
| GO:0072422 | 9.49838521246666e-09                                                                            | 23.0831315577078        | 0.426544875787143 |
| 8 67       | signal transduction involved in DNA damage checkpoint                                           |                         |                   |
| GO:0072395 | 1.07092005205718e-08                                                                            | 22.6968253968254        | 0.432911217216802 |
| 8 68       | signal transduction involved in cell cycle checkpoint                                           |                         |                   |
| GO:0033238 | 1.69844533038307e-08                                                                            | 21.2723214285714        | 0.458376582935437 |
| 8 72       | regulation of cellular amine metabolic process                                                  |                         |                   |
| GO:0051352 | 1.69844533038307e-08                                                                            | 21.2723214285714        | 0.458376582935437 |
| 8 72       | negative regulation of ligase activity                                                          |                         |                   |
| GO:0051437 | 1.69844533038307e-08                                                                            | 21.2723214285714        | 0.458376582935437 |
| 8 72       | positive regulation of ubiquitin-protein ligase activity involved in mitotic cell cycle         |                         |                   |
| GO:0051444 | 1.69844533038307e-08                                                                            | 21.2723214285714        | 0.458376582935437 |
| 8 72       | negative regulation of ubiquitin-protein ligase activity                                        |                         |                   |
| GO:0031571 | 1.8976266206716e-08                                                                             | 20.9435897435897        | 0.464742924365096 |
| 8 73       | mitotic cell cycle G1/S transition DNA damage checkpoint                                        |                         |                   |
| GO:0002479 | 2.35713488196993e-08                                                                            | 20.3155650319829        | 0.477475607224414 |
| 8 75       | antigen processing and presentation of exogenous peptide antigen via MHC class I, TAP-dependent |                         |                   |
| GO:0051439 | 3.22534796497062e-08                                                                            | 19.4408163265306        | 0.49657463151339  |
| 8 78       | regulation of ubiquitin-protein ligase activity involved in mitotic cell cycle                  |                         |                   |
| GO:0000216 | 3.57022105002875e-08                                                                            | 19.1656606304494        | 0.502940972943049 |
| 8 79       | M/G1 transition of mitotic cell cycle                                                           |                         |                   |
| GO:0042590 | 3.57022105002875e-08                                                                            | 19.1656606304494        | 0.502940972943049 |
| 8 79       | antigen processing and presentation of exogenous peptide antigen via MHC class I                |                         |                   |
| GO:0071158 | 3.94641181496668e-08                                                                            | 18.8981481481481        | 0.509307314372708 |
| 8 80       | positive regulation of cell cycle arrest                                                        |                         |                   |
| GO:0031575 | 4.80226761571519e-08                                                                            | 18.3848133848134        | 0.522039997232025 |
| 8 82       | mitotic cell cycle G1/S transition checkpoint                                                   |                         |                   |
| GO:0051443 | 4.80226761571519e-08                                                                            | 18.3848133848134        | 0.522039997232025 |
| 8 82       | positive regulation of ubiquitin-protein ligase activity                                        |                         |                   |
| GO:0002478 | 5.2870454764339e-08                                                                             | 18.1384126984127        | 0.528406338661684 |
| 8 83       | antigen processing and presentation of exogenous peptide antigen                                |                         |                   |
| GO:0031145 | 5.2870454764339e-08                                                                             | 18.1384126984127        | 0.528406338661684 |
| 8 83       | anaphase-promoting complex-dependent proteasomal ubiquitin-dependent protein catabolic process  |                         |                   |
| GO:0019884 | 6.38420335084693e-08                                                                            | 17.6648113790971        | 0.541139021521002 |
| 8 85       | antigen processing and presentation of exogenous antigen                                        |                         |                   |
| GO:0051351 | 7.00261860721298e-08                                                                            | 17.4371184371184        | 0.547505362950661 |
| 8 86       | positive regulation of ligase activity                                                          |                         |                   |
| GO:0071779 | 7.00261860721298e-08                                                                            | 17.4371184371184        | 0.547505362950661 |
| 8 86       | G1/S transition checkpoint                                                                      |                         |                   |
| GO:0051438 | 1.66164145842762e-07                                                                            | 15.4448051948052        | 0.611168777247249 |
| 8 96       | regulation of ubiquitin-protein ligase activity                                                 |                         |                   |
| GO:0002474 | 2.11225746466807e-07                                                                            | 14.9324960753532        | 0.630267801536226 |
| 8 99       | antigen processing and presentation of peptide antigen via MHC class I                          |                         |                   |
| GO:2000045 | 2.11225746466807e-07                                                                            | 14.9324960753532        | 0.630267801536226 |
| 8 99       | regulation of G1/S transition of mitotic cell cycle                                             |                         |                   |
| GO:0051340 | 2.28406896786785e-07                                                                            | 14.7691511387164        | 0.636634142965885 |
| 8 100      | regulation of ligase activity                                                                   |                         |                   |
| GO:0042770 | 2.55183165295285e-07                                                                            | 11.7770624482663        | 0.891287800152239 |
| 9 140      | signal transduction in response to DNA damage                                                   |                         |                   |
| GO:0051320 | 3.05775335256105e-07                                                                            | 11.5109692501349        | 0.910386824441215 |
| 9 143      | S phase                                                                                         |                         |                   |
| GO:0048002 | 4.14541140637089e-07                                                                            | 13.58 0.687564874403156 | 8 108             |
|            | antigen processing and presentation of peptide antigen                                          |                         |                   |
| GO:0030330 | 7.66453401281928e-07                                                                            | 12.4508519003932        | 0.744861947270085 |
| 8 117      | DNA damage response, signal transduction by p53 class mediator                                  |                         |                   |
| GO:0000209 | 8.3355571864438e-07                                                                             | 10.1349873176918        | 1.02498097017507  |
| 9 161      | protein polyubiquitination                                                                      |                         |                   |
| GO:0072331 | 1.12210981268672e-06                                                                            | 11.7962732919255        | 0.783059995848038 |

STable4\_20PerPair

|                                           |             |                                                                      |                  |                  |          |                   |         |                   |       |
|-------------------------------------------|-------------|----------------------------------------------------------------------|------------------|------------------|----------|-------------------|---------|-------------------|-------|
| 8                                         | 123         | signal transduction by p53 class mediator                            |                  |                  |          |                   |         |                   |       |
| GO:0031396                                |             | 1.19040865829112e-06                                                 | 9.68401909524892 |                  |          |                   |         | 1.06954536018269  |       |
| 9                                         | 168         | regulation of protein ubiquitination                                 |                  |                  |          |                   |         |                   |       |
| GO:0031398                                |             | 1.43044643452998e-06                                                 | 11.3965586234494 |                  |          |                   |         | 0.808525361566674 |       |
| 8                                         | 127         | positive regulation of protein ubiquitination                        |                  |                  |          |                   |         |                   |       |
| GO:0000077                                |             | 1.7066354953522e-06                                                  | 11.1139734582358 |                  |          |                   |         | 0.82762438585565  |       |
| 8                                         | 130         | DNA damage checkpoint                                                |                  |                  |          |                   |         |                   |       |
| GO:0000084                                |             | 2.1445634729058e-06                                                  | 10.7581254724112 |                  |          |                   |         | 0.853089751574286 |       |
| 8                                         | 134         | S phase of mitotic cell cycle                                        |                  |                  |          |                   |         |                   |       |
| GO:0031570                                |             | 2.39717622022303e-06                                                 | 10.5885416666667 |                  |          |                   |         | 0.865822434433603 |       |
| 8                                         | 136         | DNA integrity checkpoint                                             |                  |                  |          |                   |         |                   |       |
| GO:0007093                                |             | 2.82334120209182e-06                                                 | 10.343874954562  | 0.88492145872258 |          |                   |         |                   | 8     |
| 139                                       | mitotic     | cell cycle checkpoint                                                |                  |                  |          |                   |         |                   |       |
| GO:2000602                                |             | 4.28674983908019e-06                                                 | 9.74306269270298 |                  |          |                   |         | 0.935852190159851 |       |
| 8                                         | 147         | regulation of interphase of mitotic cell cycle                       |                  |                  |          |                   |         |                   |       |
| GO:0090068                                |             | 5.23212999626783e-06                                                 | 9.46786546786547 |                  |          |                   |         | 0.961317555878486 |       |
| 8                                         | 151         | positive regulation of cell cycle process                            |                  |                  |          |                   |         |                   |       |
| GO:0019882                                |             | 5.49428429262543e-06                                                 | 9.40145502645503 |                  |          |                   |         | 0.967683897308145 |       |
| 8                                         | 152         | antigen processing and presentation                                  |                  |                  |          |                   |         |                   |       |
| GO:0010565                                |             | 6.05209203002869e-06                                                 | 9.27136333985649 |                  |          |                   |         | 0.980416580167462 |       |
| 8                                         | 154         | regulation of cellular ketone metabolic process                      |                  |                  |          |                   |         |                   |       |
| GO:0043161                                |             | 7.17183441957019e-06                                                 | 7.67656626506024 |                  |          |                   |         | 1.3305653587987   | 9     |
| 209                                       | proteasomal | ubiquitin-dependent protein catabolic process                        |                  |                  |          |                   |         |                   |       |
| GO:0010498                                |             | 9.35637758101783e-06                                                 | 7.41330539549502 |                  |          |                   |         | 1.37512974880631  |       |
| 9                                         | 216         | proteasomal protein catabolic process                                |                  |                  |          |                   |         |                   |       |
| GO:0006511                                |             | 1.92912918139558e-05                                                 | 5.38824187738258 |                  |          |                   |         | 2.31734828039582  |       |
| 11                                        | 364         | ubiquitin-dependent protein catabolic process                        |                  |                  |          |                   |         |                   |       |
| Tissue: whole_Blood=>Heart_Left_Ventricle |             | Type: cluster                                                        |                  |                  |          |                   |         |                   |       |
| SourceGene:                               |             | RP11-166P13.3(ENSG00000263004.1)                                     |                  |                  |          |                   |         |                   |       |
| TargetGeneSet:                            |             | CTNNBIP1                                                             | RSG1             | WBP1             | FUCA1    | PPIE              | UROD    | RP11              |       |
| ZFYVE9                                    | ZRANB2      | MTF2                                                                 | PSMA5            | CERS2            | PSMB4    | C1orf61           | SMG7    | GS1               | RBBP5 |
| KIF3C                                     | GCFC2       | RNF181                                                               | POU3F3           | PSMD14           | PSMD6    | PSMC1P1           | C3orf17 | GK5               | NMD3  |
| YEATS2                                    | GRIA2       | GPM6A                                                                | BRD9             | WDR70            | PAPD4    | YTHDC2            | CTB     | PDLIM7            | UFL1  |
| PSMB1                                     | AMPH        | CDK13                                                                | UBE3C            | PYCRL            | KIAA2026 |                   | NFIB    | XPA               | FPGS  |
| NOXA1                                     | TAF3        | DLG5                                                                 | BTAF1            | PSMD13           | OR52E8   | ZNF143            | YIF1A   | C12orf5           | AKAP3 |
| STRAP                                     | PSG1        | ATF7                                                                 | MVK              | IFT81            | VPS29    | PABPC3            | EXOSC8  | UCHL3             | FBXL3 |
| PSMC6                                     | PSMC1       | VRK1                                                                 | RPL4             | COMMD4           | SNX33    | WDR61             | FBXL16  | CREBBP            | MAZ   |
| SULT1A3                                   | SALL1       | TMEM208                                                              | CTCF             | ZFHX3            | ZBTB4    | C17orf39          |         | RPL17P43          |       |
| KCNJ12                                    | WIPF2       | G6PC3                                                                | GFAP             | ANKRD40          | TUBD1    | MAP3K3            | CHMP6   | MIR133A1          |       |
| C19orf6                                   | ZBTB7A      | NCAN                                                                 | ZNF461           | CTU1             | ZNF580   | SNRNP             | ITPA    | PYGB              | SLPI  |
| ZNF512B                                   | CBS         | TCF20                                                                | RBM3             | MAGED1           | PABPC1P3 |                   | BCORL1  |                   |       |
| GOBPID                                    | Pvalue      | OddsRatio                                                            | ExpCount         | Count            | Size     | Term              |         |                   |       |
| GO:0006521                                |             | 2.53435722653352e-09                                                 |                  | 27.8134110787172 |          | 0.362881461490554 |         |                   |       |
| 8                                         | 57          | regulation of cellular amino acid metabolic process                  |                  |                  |          |                   |         |                   |       |
| GO:0031397                                |             | 6.49469187792333e-09                                                 |                  | 18.6506024096386 |          | 0.585703411528614 |         |                   |       |
| 9                                         | 92          | negative regulation of protein ubiquitination                        |                  |                  |          |                   |         |                   |       |
| GO:0006977                                |             | 8.40770360980823e-09                                                 |                  | 23.4827586206897 |          | 0.420178534357484 |         |                   |       |
| 8                                         | 66          | DNA damage response, signal transduction by p53 class mediator       |                  |                  |          |                   |         |                   |       |
| resulting in cell cycle arrest            |             |                                                                      |                  |                  |          |                   |         |                   |       |
| GO:0072413                                |             | 8.40770360980823e-09                                                 |                  | 23.4827586206897 |          | 0.420178534357484 |         |                   |       |
| 8                                         | 66          | signal transduction involved in mitotic cell cycle checkpoint        |                  |                  |          |                   |         |                   |       |
| GO:0072431                                |             | 8.40770360980823e-09                                                 |                  | 23.4827586206897 |          | 0.420178534357484 |         |                   |       |
| 8                                         | 66          | signal transduction involved in mitotic cell cycle G1/S transition   |                  |                  |          |                   |         |                   |       |
| DNA damage checkpoint                     |             |                                                                      |                  |                  |          |                   |         |                   |       |
| GO:0072474                                |             | 8.40770360980823e-09                                                 |                  | 23.4827586206897 |          | 0.420178534357484 |         |                   |       |
| 8                                         | 66          | signal transduction involved in mitotic cell cycle G1/S checkpoint   |                  |                  |          |                   |         |                   |       |
| GO:0051436                                |             | 9.49838521246666e-09                                                 |                  | 23.0831315577078 |          | 0.426544875787143 |         |                   |       |
| 8                                         | 67          | negative regulation of ubiquitin-protein ligase activity involved in |                  |                  |          |                   |         |                   |       |
| mitotic cell cycle                        |             |                                                                      |                  |                  |          |                   |         |                   |       |
| GO:0072401                                |             | 9.49838521246666e-09                                                 |                  | 23.0831315577078 |          | 0.426544875787143 |         |                   |       |
| 8                                         | 67          | signal transduction involved in DNA integrity checkpoint             |                  |                  |          |                   |         |                   |       |
| GO:0072404                                |             | 9.49838521246666e-09                                                 |                  | 23.0831315577078 |          | 0.426544875787143 |         |                   |       |
| 8                                         | 67          | signal transduction involved in G1/S transition checkpoint           |                  |                  |          |                   |         |                   |       |

Stable4\_20PerPair

|            |                                                                                                 |                         |                   |
|------------|-------------------------------------------------------------------------------------------------|-------------------------|-------------------|
| GO:0072422 | 9.49838521246666e-09                                                                            | 23.0831315577078        | 0.426544875787143 |
| 8 67       | signal transduction involved in DNA damage checkpoint                                           |                         |                   |
| GO:0072395 | 1.07092005205718e-08                                                                            | 22.6968253968254        | 0.432911217216802 |
| 8 68       | signal transduction involved in cell cycle checkpoint                                           |                         |                   |
| GO:0033238 | 1.69844533038307e-08                                                                            | 21.2723214285714        | 0.458376582935437 |
| 8 72       | regulation of cellular amine metabolic process                                                  |                         |                   |
| GO:0051352 | 1.69844533038307e-08                                                                            | 21.2723214285714        | 0.458376582935437 |
| 8 72       | negative regulation of ligase activity                                                          |                         |                   |
| GO:0051437 | 1.69844533038307e-08                                                                            | 21.2723214285714        | 0.458376582935437 |
| 8 72       | positive regulation of ubiquitin-protein ligase activity involved in mitotic cell cycle         |                         |                   |
| GO:0051444 | 1.69844533038307e-08                                                                            | 21.2723214285714        | 0.458376582935437 |
| 8 72       | negative regulation of ubiquitin-protein ligase activity                                        |                         |                   |
| GO:0031571 | 1.8976266206716e-08                                                                             | 20.9435897435897        | 0.464742924365096 |
| 8 73       | mitotic cell cycle G1/S transition DNA damage checkpoint                                        |                         |                   |
| GO:0002479 | 2.35713488196993e-08                                                                            | 20.3155650319829        | 0.477475607224414 |
| 8 75       | antigen processing and presentation of exogenous peptide antigen via MHC class I, TAP-dependent |                         |                   |
| GO:0051439 | 3.22534796497062e-08                                                                            | 19.4408163265306        | 0.49657463151339  |
| 8 78       | regulation of ubiquitin-protein ligase activity involved in mitotic cell cycle                  |                         |                   |
| GO:0000216 | 3.57022105002875e-08                                                                            | 19.1656606304494        | 0.502940972943049 |
| 8 79       | M/G1 transition of mitotic cell cycle                                                           |                         |                   |
| GO:0042590 | 3.57022105002875e-08                                                                            | 19.1656606304494        | 0.502940972943049 |
| 8 79       | antigen processing and presentation of exogenous peptide antigen via MHC class I                |                         |                   |
| GO:0071158 | 3.94641181496668e-08                                                                            | 18.8981481481481        | 0.509307314372708 |
| 8 80       | positive regulation of cell cycle arrest                                                        |                         |                   |
| GO:0031575 | 4.80226761571519e-08                                                                            | 18.3848133848134        | 0.522039997232025 |
| 8 82       | mitotic cell cycle G1/S transition checkpoint                                                   |                         |                   |
| GO:0051443 | 4.80226761571519e-08                                                                            | 18.3848133848134        | 0.522039997232025 |
| 8 82       | positive regulation of ubiquitin-protein ligase activity                                        |                         |                   |
| GO:0002478 | 5.2870454764339e-08                                                                             | 18.1384126984127        | 0.528406338661684 |
| 8 83       | antigen processing and presentation of exogenous peptide antigen                                |                         |                   |
| GO:0031145 | 5.2870454764339e-08                                                                             | 18.1384126984127        | 0.528406338661684 |
| 8 83       | anaphase-promoting complex-dependent proteasomal ubiquitin-dependent protein catabolic process  |                         |                   |
| GO:0019884 | 6.38420335084693e-08                                                                            | 17.6648113790971        | 0.541139021521002 |
| 8 85       | antigen processing and presentation of exogenous antigen                                        |                         |                   |
| GO:0051351 | 7.00261860721298e-08                                                                            | 17.4371184371184        | 0.547505362950661 |
| 8 86       | positive regulation of ligase activity                                                          |                         |                   |
| GO:0071779 | 7.00261860721298e-08                                                                            | 17.4371184371184        | 0.547505362950661 |
| 8 86       | G1/S transition checkpoint                                                                      |                         |                   |
| GO:0051438 | 1.66164145842762e-07                                                                            | 15.4448051948052        | 0.611168777247249 |
| 8 96       | regulation of ubiquitin-protein ligase activity                                                 |                         |                   |
| GO:0002474 | 2.11225746466807e-07                                                                            | 14.9324960753532        | 0.630267801536226 |
| 8 99       | antigen processing and presentation of peptide antigen via MHC class I                          |                         |                   |
| GO:2000045 | 2.11225746466807e-07                                                                            | 14.9324960753532        | 0.630267801536226 |
| 8 99       | regulation of G1/S transition of mitotic cell cycle                                             |                         |                   |
| GO:0051340 | 2.28406896786785e-07                                                                            | 14.7691511387164        | 0.636634142965885 |
| 8 100      | regulation of ligase activity                                                                   |                         |                   |
| GO:0042770 | 2.55183165295285e-07                                                                            | 11.7770624482663        | 0.891287800152239 |
| 9 140      | signal transduction in response to DNA damage                                                   |                         |                   |
| GO:0051320 | 3.05775335256105e-07                                                                            | 11.5109692501349        | 0.910386824441215 |
| 9 143      | S phase                                                                                         |                         |                   |
| GO:0048002 | 4.14541140637089e-07                                                                            | 13.58 0.687564874403156 | 8 108             |
|            | antigen processing and presentation of peptide antigen                                          |                         |                   |
| GO:0030330 | 7.66453401281928e-07                                                                            | 12.4508519003932        | 0.744861947270085 |
| 8 117      | DNA damage response, signal transduction by p53 class mediator                                  |                         |                   |
| GO:0000209 | 8.3355571864438e-07                                                                             | 10.1349873176918        | 1.02498097017507  |
| 9 161      | protein polyubiquitination                                                                      |                         |                   |
| GO:0072331 | 1.12210981268672e-06                                                                            | 11.7962732919255        | 0.783059995848038 |

STable4\_20PerPair

|                                           |                 |                                                                          |                  |                    |       |                     |       |                   |      |
|-------------------------------------------|-----------------|--------------------------------------------------------------------------|------------------|--------------------|-------|---------------------|-------|-------------------|------|
| 8                                         | 123             | signal transduction by p53 class mediator                                |                  |                    |       |                     |       |                   |      |
| GO:0031396                                |                 | 1.19040865829112e-06                                                     | 9.68401909524892 |                    |       |                     |       | 1.06954536018269  |      |
| 9                                         | 168             | regulation of protein ubiquitination                                     |                  |                    |       |                     |       |                   |      |
| GO:0031398                                |                 | 1.43044643452998e-06                                                     | 11.3965586234494 |                    |       |                     |       | 0.808525361566674 |      |
| 8                                         | 127             | positive regulation of protein ubiquitination                            |                  |                    |       |                     |       |                   |      |
| GO:0000077                                |                 | 1.7066354953522e-06                                                      | 11.1139734582358 |                    |       |                     |       | 0.82762438585565  |      |
| 8                                         | 130             | DNA damage checkpoint                                                    |                  |                    |       |                     |       |                   |      |
| GO:0000084                                |                 | 2.1445634729058e-06                                                      | 10.7581254724112 |                    |       |                     |       | 0.853089751574286 |      |
| 8                                         | 134             | S phase of mitotic cell cycle                                            |                  |                    |       |                     |       |                   |      |
| GO:0031570                                |                 | 2.39717622022303e-06                                                     | 10.5885416666667 |                    |       |                     |       | 0.865822434433603 |      |
| 8                                         | 136             | DNA integrity checkpoint                                                 |                  |                    |       |                     |       |                   |      |
| GO:0007093                                |                 | 2.82334120209182e-06                                                     | 10.343874954562  | 0.88492145872258   |       |                     |       |                   | 8    |
| 139                                       | mitotic         | cell cycle checkpoint                                                    |                  |                    |       |                     |       |                   |      |
| GO:2000602                                |                 | 4.28674983908019e-06                                                     | 9.74306269270298 |                    |       |                     |       | 0.935852190159851 |      |
| 8                                         | 147             | regulation of interphase of mitotic cell cycle                           |                  |                    |       |                     |       |                   |      |
| GO:0090068                                |                 | 5.23212999626783e-06                                                     | 9.46786546786547 |                    |       |                     |       | 0.961317555878486 |      |
| 8                                         | 151             | positive regulation of cell cycle process                                |                  |                    |       |                     |       |                   |      |
| GO:0019882                                |                 | 5.49428429262543e-06                                                     | 9.40145502645503 |                    |       |                     |       | 0.967683897308145 |      |
| 8                                         | 152             | antigen processing and presentation                                      |                  |                    |       |                     |       |                   |      |
| GO:0010565                                |                 | 6.05209203002869e-06                                                     | 9.27136333985649 |                    |       |                     |       | 0.980416580167462 |      |
| 8                                         | 154             | regulation of cellular ketone metabolic process                          |                  |                    |       |                     |       |                   |      |
| GO:0043161                                |                 | 7.17183441957019e-06                                                     | 7.67656626506024 |                    |       |                     |       | 1.3305653587987   | 9    |
| 209                                       | proteasomal     | ubiquitin-dependent protein catabolic process                            |                  |                    |       |                     |       |                   |      |
| GO:0010498                                |                 | 9.35637758101783e-06                                                     | 7.41330539549502 |                    |       |                     |       | 1.37512974880631  |      |
| 9                                         | 216             | proteasomal protein catabolic process                                    |                  |                    |       |                     |       |                   |      |
| GO:0006511                                |                 | 1.92912918139558e-05                                                     | 5.38824187738258 |                    |       |                     |       | 2.31734828039582  |      |
| 11                                        | 364             | ubiquitin-dependent protein catabolic process                            |                  |                    |       |                     |       |                   |      |
| Tissue: Heart_Left_Ventricle=>Whole_Blood |                 | Type: asymmetric                                                         |                  |                    |       |                     |       |                   |      |
| SourceGene:                               |                 | RP11-29H23.6(ENSG00000223503.1)                                          |                  |                    |       |                     |       |                   |      |
| TargetGeneSet:                            |                 | RP11                                                                     | TNFSF13B         | AKT3               | STK25 | STEAP2              | XRCC2 | SMC3              | FEN1 |
| KNTC1 RFC3                                |                 | CACNA1H                                                                  | PKMYT1           | CDH11              | CDT1  | CDK5R1              | CDC6  | EME1              | TYMS |
| RNASEH2A                                  |                 | CDC45                                                                    |                  |                    |       |                     |       |                   |      |
| GOBPID                                    | Pvalue          | OddsRatio                                                                | ExpCount         | Count              | Size  | Term                |       |                   |      |
| GO:0006260                                |                 | 1.30978487834235e-09                                                     | 36.3358974358974 |                    |       | 0.370908587640994   |       |                   |      |
| 8                                         | 268             | DNA replication                                                          |                  |                    |       |                     |       |                   |      |
| GO:0000083                                |                 | 1.92033805358757e-08                                                     | 200.180555555556 |                    |       | 0.0304477198809771  |       |                   |      |
| 4                                         | 22              | regulation of transcription involved in G1/S phase of mitotic cell cycle |                  |                    |       |                     |       |                   |      |
| GO:0006261                                |                 | 1.42254481950831e-07                                                     | 54.3295454545455 |                    |       | 0.128710815860494   |       |                   |      |
| 5                                         | 93              | DNA-dependent DNA replication                                            |                  |                    |       |                     |       |                   |      |
| GO:0000076                                |                 | 2.70364629542563e-07                                                     | 363.63025210084  | 0.0138398726731714 |       | 3                   |       |                   |      |
| 10                                        | DNA replication | checkpoint                                                               |                  |                    |       |                     |       |                   |      |
| GO:0051329                                |                 | 4.66216865145218e-07                                                     | 20.3500827129859 |                    |       | 0.524531174313196   |       |                   |      |
| 7                                         | 379             | interphase of mitotic cell cycle                                         |                  |                    |       |                     |       |                   |      |
| GO:0010972                                |                 | 4.94794066892285e-07                                                     | 282.78431372549  | 0.0166078472078057 |       | 3                   |       |                   |      |
| 12                                        | negative        | regulation of G2/M transition of mitotic cell cycle                      |                  |                    |       |                     |       |                   |      |
| GO:0051325                                |                 | 5.36791290777933e-07                                                     | 19.9103238866397 |                    |       | 0.535603072451733   |       |                   |      |
| 7                                         | 387             | interphase                                                               |                  |                    |       |                     |       |                   |      |
| GO:0010564                                |                 | 8.45215652260883e-07                                                     | 18.5537705537706 |                    |       | 0.572970728669296   |       |                   |      |
| 7                                         | 414             | regulation of cell cycle process                                         |                  |                    |       |                     |       |                   |      |
| GO:0000084                                |                 | 8.81850629341559e-07                                                     | 36.9560723514212 |                    |       | 0.185454293820497   |       |                   |      |
| 5                                         | 134             | S phase of mitotic cell cycle                                            |                  |                    |       |                     |       |                   |      |
| GO:0051320                                |                 | 1.21685080455504e-06                                                     | 34.524154589372  | 0.197910179226351  |       | 5                   |       |                   |      |
| 143                                       | S phase         |                                                                          |                  |                    |       |                     |       |                   |      |
| GO:0000082                                |                 | 4.43631168046153e-06                                                     | 26.2430939226519 |                    |       | 0.257421631720988   |       |                   |      |
| 5                                         | 186             | G1/S transition of mitotic cell cycle                                    |                  |                    |       |                     |       |                   |      |
| GO:0010948                                |                 | 8.1665664208113e-06                                                      | 38.9646739130435 |                    |       | 0.132862777662446   |       |                   |      |
| 4                                         | 96              | negative regulation of cell cycle process                                |                  |                    |       |                     |       |                   |      |
| GO:0010389                                |                 | 8.98724677238467e-06                                                     | 94.1437908496732 |                    |       | 0.0415196180195142  |       |                   |      |
| 3                                         | 30              | regulation of G2/M transition of mitotic cell cycle                      |                  |                    |       |                     |       |                   |      |
| GO:0006281                                |                 | 9.42699119265486e-06                                                     | 15.9765062523683 |                    |       | 0.530067123382465   |       |                   |      |
| 6                                         | 383             | DNA repair                                                               |                  |                    |       |                     |       |                   |      |
| GO:0046683                                |                 | 1.0900525832417e-05                                                      | 801.611111111111 |                    |       | 0.00553594906926856 |       |                   |      |

STable4\_20PerPair

2 4 response to organophosphorus  
 GO:0006271 1.31995368287061e-05 81.9734345351044 0.0470555670887828  
 3 34 DNA strand elongation involved in DNA replication  
 GO:0000075 1.5951907560306e-05 19.9634317862166 0.334924918690748  
 5 242 cell cycle checkpoint  
 GO:0022616 1.7093775598175e-05 74.7249134948097 0.0512075288907342  
 3 37 DNA strand elongation  
 Tissue: Heart\_Left\_Ventricle=>Whole\_Blood Type: asymmetric  
 SourceGene: RP3-434014.8(ENSG00000232222.1)  
 TargetGeneSet: MPL RP11 PEAR1 SELP C1orf198 C2orf88 VIL1  
 KLF15 PPBP ARHGAP21 CTD SH3TC2 F13A1 LY6G6F C6orf25 TREML1 DAO  
 EDF1 TSPAN15 CTTN PDE2A NRG1 ESAM ARG2 C14orf133 LGMN  
 PCSK6 ITGB3 C17orf109 KXD1 SYTL4  
 GOBPID Pvalue OddsRatio ExpCount Count Size Term  
 GO:0007596 2.57611964243697e-07 17.5070643642072 0.723686942080133  
 8 498 blood coagulation  
 GO:0030168 4.80947826801868e-07 26.9554502369668 0.315341498858211  
 6 217 platelet activation  
 GO:0002576 5.62061770647382e-06 42.7431124348474 0.120614490346689  
 4 83 platelet degranulation  
 Tissue: whole\_Blood=>Heart\_Left\_Ventricle Type: asymmetric

SourceGene: ZUFSP(ENSG00000153975.5) zinc finger with UFM1-specific  
 peptidase domain

TargetGeneSet: MRPL20 WBP1 ZBTB40 MRPL37 HBXIP ATP5F1 HAX1 MRPL24  
 LINC00467 MSH6 EIF3FP3 COMMD1 SNRNP200 CHCHD5 ATP5G3 UBE2E3  
 WDR48 FYCO1 MYL3 PBRM1 SPCS1 THOC7 GTPBP8 FBXO40 SRPRB TRA2B  
 OCIAD1 NDUFC1 SMARCA5 KIAA0922 KIAA0947 SUB1 NDUFS4 PCBD2  
 SLC35A4 TBC1D9B TMEM14B CUL9 GABRR2 GTF3C6 HDDC2 BAZ1B FIS1 TNPO3 RP4  
 DCTN6 MRPL15 RPS20 ARFGF1 KLHL38 NDUFB9 CTD CYC1 C9orf46 ERP44  
 NIPSNAP3B RABGAP1 PSMB7 AK1 RP11 METTL11A FCN2 KIAA0913  
 SMC3 NUDT22 RELA YIF1A PPP6R3 NUMA1 LAMTOR1 SPCS2 ERC1 MRPL51  
 SMARCC2 ANKRD52 GLIPR1L1 NDUFA12 SLC25A3 ALDH1L2 TCP11L2 ISCU KDM2B MED4  
 MED4-AS1 SALL2 CEBPE C14orf182 CDC42BPB HERC2 TPM1  
 DENND4A UBL7 COX5A SIN3A MRPS11 ITFG3 MRPL28 ZNF598 CREBBP SETD1A RBL2  
 COX4I1 PSMB6 DVL2 CTC1 POLDIP2 SYNRG SOCS7 C17orf53 NPEPPS  
 TBKBP1 SNF8 SLC35B1 ICT1 RNF213 C18orf32 HAUS8 POP4 COX6B1  
 PPP6R1 CHMP2A CBFA2T2 CEP250 ATP50 MRPL40 LDOC1L PRDX4 SAT1 HSD17B10

STable4\_20PerPair

COX7B FAM127A MT

| GOBPID     | Pvalue   | OddsRatio | ExpCount    | Count       | Size | Term                                                       |
|------------|----------|-----------|-------------|-------------|------|------------------------------------------------------------|
| GO:0022904 | 7.46E-11 |           | 20.06304348 | 0.684243305 | 11   | 96<br>respiratory electron transport chain                 |
| GO:0022900 | 2.78E-09 |           | 13.827766   | 0.955089613 | 11   | 134<br>electron transport chain                            |
| GO:0045333 | 5.15E-09 |           | 12.97602058 | 1.012109889 | 11   | 142<br>cellular respiration                                |
| GO:0015980 | 2.69E-07 |           | 6.904837491 | 2.188153069 | 13   | 307<br>energy derivation by oxidation of organic compounds |

STable4\_20PerPair

GO:0006091 2.01E-06 5.29436031 3.050584735 14 428  
 generation of precursor metabolites and energy

Tissue: whole\_Blood=>Heart\_Left\_Ventricle Type: cluster  
 SourceGene: ZUFSP(ENSG00000153975.5)  
 TargetGeneSet: MRPL20 WBP1 ZBTB40 MRPL37 HBXIP ATP5F1 HAX1 MRPL24  
 LINC00467 MSH6 EIF3FP3 COMMD1 SNRNP200 CHCHD5 ATP5G3 UBE2E3  
 WDR48 FYCO1 MYL3 PBRM1 SPCS1 THOC7 GTPBP8 FBXO40 SRPRB TRA2B  
 OCIAD1 NDUFC1 SMARCA5 KIAA0922 KIAA0947 SUB1 NDUFS4 PCBD2  
 SLC35A4 TBC1D9B TMEM14B CUL9 GABRR2 GTF3C6 HDDC2 BAZ1B FIS1 TNPO3 RP4  
 DCTN6 MRPL15 RPS20 ARFGEF1 KLHL38 NDUFB9 CTD CYC1 C9orf46 ERP44  
 NIPSNAP3B RABGAP1 PSMB7 AK1 RP11 METTL11A FCN2 KIAA0913  
 SMC3 NUDT22 RELA YIF1A PPP6R3 NUMA1 LAMTOR1 SPCS2 ERC1 MRPL51  
 SMARCC2 ANKRD52 GLIPR1L1 NDUFA12 SLC25A3 ALDH1L2 TCP11L2 ISCU KDM2B MED4  
 MED4-AS1 SALL2 CEBPE C14orf182 CDC42BPB HERC2 TPM1  
 DENND4A UBL7 COX5A SIN3A MRPS11 ITFG3 MRPL28 ZNF598 CREBBP SETD1A RBL2  
 COX4I1 PSMB6 DVL2 CTC1 POLDIP2 SYNRG SOCS7 C17orf53 NPEPPS  
 TBKBP1 SNF8 SLC35B1 ICT1 RNF213 C18orf32 HAUS8 POP4 COX6B1  
 PPP6R1 CHMP2A CBFA2T2 CEP250 ATP50 MRPL40 LDOC1L PRDX4 SAT1 HSD17B10  
 COX7B FAM127A MT

| GOBPID     | Pvalue | OddsRatio            | ExpCount                                            | Count | Size | Term              |
|------------|--------|----------------------|-----------------------------------------------------|-------|------|-------------------|
| GO:0022904 | 96     | 7.46040687237286e-11 | 20.0630434782609                                    |       |      | 0.684243304961594 |
| 11         |        |                      | respiratory electron transport chain                |       |      |                   |
| GO:0022900 | 134    | 2.78209342845419e-09 | 13.8277659950513                                    |       |      | 0.955089613175559 |
| 11         |        |                      | electron transport chain                            |       |      |                   |
| GO:0045333 | 142    | 5.14719971426576e-09 | 12.9760205774975                                    |       |      | 1.01210988858902  |
| 11         |        |                      | cellular respiration                                |       |      |                   |
| GO:0015980 | 307    | 2.68791510830652e-07 | 6.90483749055178                                    |       |      | 2.18815306899177  |
| 13         |        |                      | energy derivation by oxidation of organic compounds |       |      |                   |
| GO:0006091 | 428    | 2.0110456640133e-06  | 5.29436031048146                                    |       |      | 3.05058473462044  |
| 14         |        |                      | generation of precursor metabolites and energy      |       |      |                   |

Tissue: Lung=>Adipose\_Subcutaneous Type: asymmetric  
 SourceGene: CHPF(ENSG00000123989.9)  
 TargetGeneSet: RP4 C1QC RPS6KA1 MTMR9LP PPP1R8P1 VAV3 ADORA3 RHOC  
 SLAMF8 PEA15 CD84 ARHGAP30 MR1 PTPRC PTPN7 PLEK VAMP8  
 HCLS1 CD86 RBM47 TXK RP13 RP11 DOCK2 AIF1 DEFA6 AOA  
 PKD1L1 IRF5 TSPAN33 TBXAS1 SYK FGD3 CARD9 C1DP3 PIK3AP1 MS4A6A  
 MS4A7 FOLR2 SLC02B1 PTPN6 BIN2 NCKAP1L ARHGAP9 SELPLG STX2 GPR65  
 PLCB2 MCTP2 PRKCB CORO1A CD68 CD209 MYO1F IFI30 LRRC25 HCST CD37  
 SIGLEC7 CD33 LILRB4 HCK PLTP CYTH4 WAS BTK  
 GOBPID Pvalue OddsRatio ExpCount Count Size Term  
 GO:0002757 6.11223291950693e-11 17.7365731567421 0.894401771503702

Stable4\_20PerPair

|            |     |                                                                    |                  |                   |
|------------|-----|--------------------------------------------------------------------|------------------|-------------------|
| 12         | 235 | immune response-activating signal transduction                     |                  |                   |
| GO:0002253 |     | 6.54365716990887e-11                                               | 15.2705627705628 | 1.13798353055152  |
| 13         | 299 | activation of immune response                                      |                  |                   |
| GO:0002764 |     | 1.14208734396507e-10                                               | 16.7441860465116 | 0.94387931631029  |
| 12         | 248 | immune response-regulating signaling pathway                       |                  |                   |
| GO:0046649 |     | 5.41088583227107e-10                                               | 11.3905349554689 | 1.64798283855789  |
| 14         | 433 | lymphocyte activation                                              |                  |                   |
| GO:0050778 |     | 7.40609348814129e-10                                               | 12.3853615520282 | 1.38537125458446  |
| 13         | 364 | positive regulation of immune response                             |                  |                   |
| GO:0050853 |     | 1.01921517828083e-09                                               | 76.5199645075421 | 0.110372984568542 |
| 6          | 29  | B cell receptor signaling pathway                                  |                  |                   |
| GO:0050867 |     | 1.32569903754072e-09                                               | 15.4661572052402 | 0.913431596429313 |
| 11         | 240 | positive regulation of cell activation                             |                  |                   |
| GO:0050865 |     | 4.63022740892164e-09                                               | 11.8583573385794 | 1.30544598989689  |
| 12         | 343 | regulation of cell activation                                      |                  |                   |
| GO:0050851 |     | 1.90796505601299e-08                                               | 21.1374653098982 | 0.468133693170023 |
| 8          | 123 | antigen receptor-mediated signaling pathway                        |                  |                   |
| GO:0042110 |     | 2.57057938060402e-08                                               | 11.4350649350649 | 1.21410283025396  |
| 11         | 319 | T cell activation                                                  |                  |                   |
| GO:0002429 |     | 3.52583829389788e-08                                               | 19.4328510638298 | 0.506193343021244 |
| 8          | 133 | immune response-activating cell surface receptor signaling pathway |                  |                   |
| GO:0002768 |     | 6.55712897074683e-08                                               | 17.8473091364205 | 0.548058957857588 |
| 8          | 144 | immune response-regulating cell surface receptor signaling pathway |                  |                   |
| GO:0051249 |     | 9.51426925376304e-08                                               | 11.4961334961335 | 1.07708809078956  |
| 10         | 283 | regulation of lymphocyte activation                                |                  |                   |
| GO:0051251 |     | 1.06145383596951e-07                                               | 13.4772055719713 | 0.818282471801259 |
| 9          | 215 | positive regulation of lymphocyte activation                       |                  |                   |
| GO:0008154 |     | 1.7226534053312e-07                                                | 20.4366830065359 | 0.414850183378313 |
| 7          | 109 | actin polymerization or depolymerization                           |                  |                   |
| GO:0030036 |     | 1.92858143964797e-07                                               | 9.27116402116402 | 1.48052037921251  |
| 11         | 389 | actin cytoskeleton organization                                    |                  |                   |
| GO:0002696 |     | 2.10535661092062e-07                                               | 12.3784937888199 | 0.886789841533458 |
| 9          | 233 | positive regulation of leukocyte activation                        |                  |                   |
| GO:0046651 |     | 2.58755171194995e-07                                               | 14.7711468604048 | 0.654625977441008 |
| 8          | 172 | lymphocyte proliferation                                           |                  |                   |
| GO:0032943 |     | 2.8272629926242e-07                                                | 14.5911304793643 | 0.662237907411252 |
| 8          | 174 | mononuclear cell proliferation                                     |                  |                   |
| GO:0042098 |     | 2.96909936061453e-07                                               | 18.7678303303303 | 0.449103868244412 |
| 7          | 118 | T cell proliferation                                               |                  |                   |
| GO:0002694 |     | 3.06600623033077e-07                                               | 10.064308681672  | 1.22171476022421  |
| 321        |     | regulation of leukocyte activation                                 |                  | 10                |
| GO:0070661 |     | 3.98656356977441e-07                                               | 13.9124480313035 | 0.692685627292229 |
| 8          | 182 | leukocyte proliferation                                            |                  |                   |
| GO:0030029 |     | 5.48532531646207e-07                                               | 8.29869358669834 | 1.64417687357276  |
| 11         | 432 | actin filament-based process                                       |                  |                   |
| GO:0007015 |     | 6.73682319805254e-07                                               | 12.9334395266811 | 0.742163172098817 |
| 8          | 195 | actin filament organization                                        |                  |                   |
| GO:0030041 |     | 7.97214287029456e-07                                               | 22.1911650736244 | 0.323507023735382 |
| 6          | 85  | actin filament polymerization                                      |                  |                   |
| GO:0051495 |     | 9.79249704460455e-07                                               | 21.3748133399701 | 0.334924918690748 |
| 6          | 88  | positive regulation of cytoskeleton organization                   |                  |                   |
| GO:0030097 |     | 1.08560817286059e-06                                               | 7.71238938053097 | 1.76216178811155  |
| 11         | 463 | hemopoiesis                                                        |                  |                   |
| GO:0050670 |     | 1.14681197787023e-06                                               | 15.1783759124088 | 0.548058957857588 |
| 7          | 144 | regulation of lymphocyte proliferation                             |                  |                   |
| GO:0032944 |     | 1.20147351317198e-06                                               | 15.0673309178744 | 0.55186492284271  |
| 7          | 145 | regulation of mononuclear cell proliferation                       |                  |                   |
| GO:0071346 |     | 1.44578315745954e-06                                               | 19.9090909090909 | 0.357760708601481 |
| 6          | 94  | cellular response to interferon-gamma                              |                  |                   |
| GO:0070663 |     | 1.50869838822367e-06                                               | 14.5354020979021 | 0.57089474776832  |
| 7          | 150 | regulation of leukocyte proliferation                              |                  |                   |
| GO:0050671 |     | 1.6365783844003e-06                                                | 19.4639455782313 | 0.365372638571725 |
| 6          | 96  | positive regulation of lymphocyte proliferation                    |                  |                   |



Stable4\_20PerPair

|                                    |                         |                                                        |                    |          |       |        |         |        |        |
|------------------------------------|-------------------------|--------------------------------------------------------|--------------------|----------|-------|--------|---------|--------|--------|
| GO:0002252                         | 1.64707071475623e-06    | 8.28605200945626                                       | 1.46910248425714   |          |       |        |         |        |        |
| 10                                 | 386                     | immune effector process                                |                    |          |       |        |         |        |        |
| GO:0042113                         | 1.72278053118714e-06    | 14.2337328767123                                       | 0.582312642723687  |          |       |        |         |        |        |
| 7                                  | 153                     | B cell activation                                      |                    |          |       |        |         |        |        |
| GO:0050863                         | 1.72969697843863e-06    | 11.3339326740585                                       | 0.8411182617111992 |          |       |        |         |        |        |
| 8                                  | 221                     | regulation of T cell activation                        |                    |          |       |        |         |        |        |
| GO:0032946                         | 1.73941345316669e-06    | 19.2487104732003                                       | 0.369178603556847  |          |       |        |         |        |        |
| 6                                  | 97                      | positive regulation of mononuclear cell proliferation  |                    |          |       |        |         |        |        |
| GO:0050871                         | 1.81977169383397e-06    | 29.2795918367347                                       | 0.205522109196595  |          |       |        |         |        |        |
| 5                                  | 54                      | positive regulation of B cell activation               |                    |          |       |        |         |        |        |
| GO:0002521                         | 1.84552895574968e-06    | 9.41734678735718                                       | 1.14940142550689   |          |       |        |         |        |        |
| 9                                  | 302                     | leukocyte differentiation                              |                    |          |       |        |         |        |        |
| GO:0070665                         | 2.08004396836927e-06    | 18.6304819800261                                       | 0.380596498512214  |          |       |        |         |        |        |
| 6                                  | 100                     | positive regulation of leukocyte proliferation         |                    |          |       |        |         |        |        |
| GO:0048534                         | 2.08294024346492e-06    | 7.18595041322314                                       | 1.88395266763546   |          |       |        |         |        |        |
| 11                                 | 495                     | hemopoietic or lymphoid organ development              |                    |          |       |        |         |        |        |
| GO:0042129                         | 2.20498672155191e-06    | 18.4330827067669                                       | 0.384402463497336  |          |       |        |         |        |        |
| 6                                  | 101                     | regulation of T cell proliferation                     |                    |          |       |        |         |        |        |
| GO:0032956                         | 2.52346204665754e-06    | 13.3987903225806                                       | 0.616566327589786  |          |       |        |         |        |        |
| 7                                  | 162                     | regulation of actin cytoskeleton organization          |                    |          |       |        |         |        |        |
| GO:0050900                         | 3.29870176098336e-06    | 10.3464523787782                                       | 0.917237561414435  |          |       |        |         |        |        |
| 8                                  | 241                     | leukocyte migration                                    |                    |          |       |        |         |        |        |
| GO:0050870                         | 3.61411491160361e-06    | 12.655487804878                                        | 0.650820012455885  | 7        |       |        |         |        |        |
| 171                                |                         | positive regulation of T cell activation               |                    |          |       |        |         |        |        |
| GO:0034341                         | 3.82642501010807e-06    | 16.665889212828                                        | 0.422462113348557  | 6        |       |        |         |        |        |
| 111                                |                         | response to interferon-gamma                           |                    |          |       |        |         |        |        |
| GO:0032970                         | 3.90346141969277e-06    | 12.5012550200803                                       | 0.65843194242613   |          |       |        |         |        |        |
| 7                                  | 173                     | regulation of actin filament-based process             |                    |          |       |        |         |        |        |
| GO:0045579                         | 4.31188258041909e-06    | 138.365384615385                                       | 0.0342536848660992 |          |       |        |         |        |        |
| 3                                  | 9                       | positive regulation of B cell differentiation          |                    |          |       |        |         |        |        |
| GO:0042102                         | 4.96753059948155e-06    | 23.5                                                   | 0.251193689018061  | 5        | 66    |        |         |        |        |
|                                    |                         | positive regulation of T cell proliferation            |                    |          |       |        |         |        |        |
| GO:0030838                         | 6.23852637015201e-06    | 40.2464985994398                                       | 0.121790879523908  |          |       |        |         |        |        |
| 4                                  | 32                      | positive regulation of actin filament polymerization   |                    |          |       |        |         |        |        |
| GO:0002697                         | 1.04599573534299e-05    | 10.6759020618557                                       | 0.76499896200955   |          |       |        |         |        |        |
| 7                                  | 201                     | regulation of immune effector process                  |                    |          |       |        |         |        |        |
| GO:0030098                         | 1.15198716201983e-05    | 10.5111040609137                                       | 0.776416856964916  |          |       |        |         |        |        |
| 7                                  | 204                     | lymphocyte differentiation                             |                    |          |       |        |         |        |        |
| GO:0060333                         | 1.20664215297118e-05    | 19.3540540540541                                       | 0.300671233824649  |          |       |        |         |        |        |
| 5                                  | 79                      | interferon-gamma-mediated signaling pathway            |                    |          |       |        |         |        |        |
| GO:0050864                         | 1.36387504586515e-05    | 18.8421052631579                                       | 0.308283163794893  |          |       |        |         |        |        |
| 5                                  | 81                      | regulation of B cell activation                        |                    |          |       |        |         |        |        |
| GO:0046631                         | 1.44825732697815e-05    | 18.5961038961039                                       | 0.312089128780015  |          |       |        |         |        |        |
| 5                                  | 82                      | alpha-beta T cell activation                           |                    |          |       |        |         |        |        |
| GO:0051258                         | 1.45711156481009e-05    | 13.0325921413341                                       | 0.532835097917099  |          |       |        |         |        |        |
| 6                                  | 140                     | protein polymerization                                 |                    |          |       |        |         |        |        |
| GO:0045088                         | 1.61993107460472e-05    | 9.94751602564103                                       | 0.818282471801259  |          |       |        |         |        |        |
| 7                                  | 215                     | regulation of innate immune response                   |                    |          |       |        |         |        |        |
| GO:0008064                         | 1.72605505608459e-05    | 17.895                                                 | 0.323507023735382  | 5        | 85    |        |         |        |        |
|                                    |                         | regulation of actin polymerization or depolymerization |                    |          |       |        |         |        |        |
| GO:0006909                         | 1.82732688707784e-05    | 17.6728395061728                                       | 0.327312988720504  |          |       |        |         |        |        |
| 5                                  | 86                      | phagocytosis                                           |                    |          |       |        |         |        |        |
| GO:0030832                         | 1.82732688707784e-05    | 17.6728395061728                                       | 0.327312988720504  |          |       |        |         |        |        |
| 5                                  | 86                      | regulation of actin filament length                    |                    |          |       |        |         |        |        |
| GO:0031347                         | 1.9042756689007e-05     | 6.95310086073714                                       | 1.53380388900422   |          |       |        |         |        |        |
| 9                                  | 403                     | regulation of defense response                         |                    |          |       |        |         |        |        |
| GO:0031334                         | 1.93316911744593e-05    | 17.4560975609756                                       | 0.331118953705626  |          |       |        |         |        |        |
| 5                                  | 87                      | positive regulation of protein complex assembly        |                    |          |       |        |         |        |        |
| Tissue: Lung=>Adipose_Subcutaneous |                         | Type: asymmetric                                       |                    |          |       |        |         |        |        |
| SourceGene:                        | DSC1(ENSG00000134765.5) |                                                        |                    |          |       |        |         |        |        |
| TargetGeneSet:                     | FBXO2                   | RPL11                                                  | KHDRBS1            | ANKRD13C | RP4   | RPL5   | RP11    |        |        |
| SNRPE                              | RCOR3                   | TTC32                                                  | UBC                | C1D      | TPRKB | DGUOK  | PTCD3   | RPL31  | MMADHC |
| PPIL3                              | EEF1B2                  | CNOT10                                                 | TRANK1             | RPL29    | H1FX  | COMMD2 | RPL22L1 | RPL35A | NUP54  |

Stable4\_20PerPair

| ENOPH1     | RPL34     | TAF9      | BTF3                 | RPS10            | RPL10A            | RP1                                                                 | TRMT11   | BZW2     | C7orf44            |
|------------|-----------|-----------|----------------------|------------------|-------------------|---------------------------------------------------------------------|----------|----------|--------------------|
| ABHD11     | SYPL1     | NUDT18    | SNHG6                | RPL30            | RPS6              | DCTN3                                                               | PSMB7    | RPL35    | RPL7A              |
| NSMCE4A    | C10orf137 | ZBED5     | EIF3M                | RPS25            | PHB2              | EMG1                                                                | COPZ1    | RPL18AP3 | RPL19              |
| RPL6       | OXA1L     | GOLGA8J   | TMEM85               | TMOD2            | RPS15A            | RPL26                                                               | RPL23A   | RPL17    | RPL19              |
| VPS25      | RPL27     | RPS15     | RPL36                | NDUFA11          | RPS16             | RPL18                                                               | C19orf48 |          | NLRP9              |
| ZNF805     | RPS5      | SOGA1     | DPM1                 | H1FO             | RPL9P7            | UXT                                                                 | IDH3G    |          |                    |
| GOBPID     | Pvalue    | OddsRatio | ExpCount             | Count            | Size              | Term                                                                |          |          |                    |
| GO:0006414 | 27        | 105       | 6.8517814376163e-41  | 115.140429338104 |                   | translational elongation                                            |          |          | 0.508615320739049  |
| GO:0006415 | 26        | 91        | 1.07660031965565e-40 | 130.145454545455 |                   | translational termination                                           |          |          | 0.440799944640509  |
| GO:0070972 | 27        | 118       | 2.39429347011336e-39 | 98.6020955788398 |                   | protein localization to endoplasmic reticulum                       |          |          | 0.571586741401979  |
| GO:0006614 | 26        | 105       | 7.61708551753886e-39 | 106.976985040276 |                   | SRP-dependent cotranslational protein targeting to membrane         |          |          | 0.508615320739049  |
| GO:0006613 | 26        | 106       | 1.00628456576097e-38 | 105.632386363636 |                   | cotranslational protein targeting to membrane                       |          |          | 0.513459276174659  |
| GO:0045047 | 26        | 106       | 1.00628456576097e-38 | 105.632386363636 |                   | protein targeting to ER                                             |          |          | 0.513459276174659  |
| GO:0072599 | 26        | 106       | 1.00628456576097e-38 | 105.632386363636 |                   | establishment of protein localization to endoplasmic reticulum      |          |          | 0.513459276174659  |
| GO:0000184 | 26        | 119       | 2.91356155036349e-37 | 90.7839687194526 |                   | nuclear-transcribed mRNA catabolic process, nonsense-mediated decay |          |          | 0.576430696837589  |
| GO:0006413 | 27        | 152       | 4.36141351998054e-36 | 71.6115348837209 |                   | translational initiation                                            |          |          | 0.736281226212719  |
| GO:0000956 | 27        | 169       | 9.43996005117733e-35 | 62.9631509990174 |                   | nuclear-transcribed mRNA catabolic process                          |          |          | 0.818628468618089  |
| GO:0019080 |           |           | 2.5199545712287e-34  | 67.392           | 0.731437270777109 | viral genome expression                                             |          | 26       | 151                |
| GO:0019083 |           |           | 2.5199545712287e-34  | 67.392           | 0.731437270777109 | viral transcription                                                 |          | 26       | 151                |
| GO:0006612 | 26        | 153       | 3.64064317998685e-34 | 66.3214030064424 |                   | protein targeting to membrane                                       |          |          | 0.741125181648329  |
| GO:0043624 | 26        | 153       | 3.64064317998685e-34 | 66.3214030064424 |                   | cellular protein complex disassembly                                |          |          | 0.741125181648329  |
| GO:0006402 | 27        | 178       | 4.19636154062652e-34 | 59.1729554905283 |                   | mRNA catabolic process                                              |          |          | 0.862224067538579  |
| GO:0043241 | 26        | 158       | 8.92655360355916e-34 | 63.7868457300276 |                   | protein complex disassembly                                         |          |          | 0.765344958826379  |
| GO:0034623 | 26        | 174       | 1.29106482638928e-32 | 56.8270884520885 |                   | cellular macromolecular complex disassembly                         |          |          | 0.842848245796139  |
| GO:0006401 | 27        | 205       | 2.34022159727951e-32 | 50.1020381499869 |                   | RNA catabolic process                                               |          |          | 0.993010864300048  |
| GO:0032984 | 26        | 179       | 2.8151867905633e-32  | 54.9506833036245 |                   | macromolecular complex disassembly                                  |          |          | 0.867068022974189  |
| GO:0072594 | 204       | 231       | 9.99212004379702e-31 | 47.149897854954  | 0.988166908864438 | establishment of protein localization to organelle                  |          | 26       |                    |
| GO:0019058 | 26        | 231       | 2.85830184933422e-29 | 40.8620842572062 |                   | viral infectious cycle                                              |          |          | 1.11895370562591   |
| GO:0071845 | 27        | 284       | 2.06522322414906e-28 | 34.5080083250385 |                   | cellular component disassembly at cellular level                    |          |          | 1.37568334371324   |
| GO:0022411 | 27        | 288       | 3.03273804619751e-28 | 33.9695268644747 |                   | cellular component disassembly                                      |          |          | 1.39505916545568   |
| GO:0022415 | 260       | 239       | 6.71787336382133e-28 | 35.7247474747475 |                   | viral reproductive process                                          |          |          | 1.2594284132586 26 |
| GO:0016032 | 29        | 451       | 1.10406752191663e-25 | 23.3967749393134 |                   | viral reproduction                                                  |          |          | 2.18462390146011   |
| GO:0033365 | 27        | 473       | 1.90883405523007e-22 | 19.6185733653144 |                   | protein localization to organelle                                   |          |          | 2.29119092104353   |
| GO:0006605 | 27        | 474       | 2.01814587967951e-22 | 19.5732792258467 |                   | protein targeting                                                   |          |          | 2.29603487647914   |
| GO:0071843 | 14        | 239       | 6.65226882536092e-12 | 15.7288888888889 |                   | cellular component biogenesis at cellular level                     |          |          | 1.15770534911079   |

Stable4\_20PerPair

|                                                  |                                                                     |                          |                    |
|--------------------------------------------------|---------------------------------------------------------------------|--------------------------|--------------------|
| GO:0022613                                       | 4.84441706346201e-11                                                | 15.2430486593843         | 1.08988997301225   |
| 13 225                                           | ribonucleoprotein complex biogenesis                                |                          |                    |
| GO:0042254                                       | 1.23986568456352e-10                                                | 19.2425693932695         | 0.721749359905889  |
| 11 149                                           | ribosome biogenesis                                                 |                          |                    |
| GO:0006364                                       | 1.64635398508183e-09                                                | 22.1870578084556         | 0.503771365303439  |
| 9 104                                            | rRNA processing                                                     |                          |                    |
| GO:0016072                                       | 2.71939754178963e-09                                                | 20.8602499594222         | 0.532835097917099  |
| 9 110                                            | rRNA metabolic process                                              |                          |                    |
| GO:0042274                                       | 1.88175089364032e-08                                                | 85.0177514792899         | 0.0871911978409799 |
| 5 18                                             | ribosomal small subunit biogenesis                                  |                          |                    |
| GO:0034470                                       | 3.96892570148744e-08                                                | 12.4482456140351         | 0.968791087121998  |
| 10 200                                           | ncRNA processing                                                    |                          |                    |
| GO:0034660                                       | 1.11608774414704e-07                                                | 9.59897315353211         | 1.38052729914885   |
| 11 285                                           | ncRNA metabolic process                                             |                          |                    |
| GO:0042273                                       | 2.42665430939766e-07                                                | 108.886363636364         | 0.0581274652273199 |
| 4 12                                             | ribosomal large subunit biogenesis                                  |                          |                    |
| Tissue: Lung=>Adipose_Subcutaneous Type: cluster |                                                                     |                          |                    |
| SourceGene: DSC1(ENSG00000134765.5)              |                                                                     |                          |                    |
| TargetGeneSet:                                   | FBXO2 RPL11 KHDRBS1 ANKRD13C RP4 RPL5 RP11                          |                          |                    |
| SNRPE RCOR3                                      | TTC32 UBC C1D TPRKB DGUOK PTCO3 RPL31 MMADHC                        |                          |                    |
| PPIL3 EEF1B2                                     | CNOT10 TRANK1 RPL29 H1FX COMMD2 RPL22L1 RPL35A NUP54                |                          |                    |
| ENOPH1 RPL34                                     | TAF9 BTF3 RPS10 RPL10A RP1 TRMT11 BZW2 C7orf44                      |                          |                    |
| ABHD11 SYPL1                                     | NUDT18 SNHG6 RPL30 RPS6 DCTN3 PSMB7 RPL35 RPL7A                     |                          |                    |
| NSMCE4A C10orf137                                | ZBED5 EIF3M RPS25 PHB2 EMG1 COPZ1 RPL18AP3                          |                          |                    |
| RPL6 OXA1L                                       | GOLGA8J TMEM85 TMOD2 RPS15A RPL26 RPL23A RPL17 RPL19                |                          |                    |
| VPS25 RPL27                                      | RPS15 RPL36 NDUFA11 RPS16 RPL18 C19orf48 NLRP9                      |                          |                    |
| ZNF805 RPS5                                      | SOGA1 DPM1 H1F0 RPL9P7 UXT IDH3G                                    |                          |                    |
| GOBPID                                           | Pvalue OddsRatio ExpCount Count Size Term                           |                          |                    |
| GO:0006414                                       | 6.8517814376163e-41                                                 | 115.140429338104         | 0.508615320739049  |
| 27 105                                           | translational elongation                                            |                          |                    |
| GO:0006415                                       | 1.07660031965565e-40                                                | 130.145454545455         | 0.440799944640509  |
| 26 91                                            | translational termination                                           |                          |                    |
| GO:0070972                                       | 2.39429347011336e-39                                                | 98.6020955788398         | 0.571586741401979  |
| 27 118                                           | protein localization to endoplasmic reticulum                       |                          |                    |
| GO:0006614                                       | 7.61708551753886e-39                                                | 106.976985040276         | 0.508615320739049  |
| 26 105                                           | SRP-dependent cotranslational protein targeting to membrane         |                          |                    |
| GO:0006613                                       | 1.00628456576097e-38                                                | 105.632386363636         | 0.513459276174659  |
| 26 106                                           | cotranslational protein targeting to membrane                       |                          |                    |
| GO:0045047                                       | 1.00628456576097e-38                                                | 105.632386363636         | 0.513459276174659  |
| 26 106                                           | protein targeting to ER                                             |                          |                    |
| GO:0072599                                       | 1.00628456576097e-38                                                | 105.632386363636         | 0.513459276174659  |
| 26 106                                           | establishment of protein localization to endoplasmic reticulum      |                          |                    |
| GO:0000184                                       | 2.91356155036349e-37                                                | 90.7839687194526         | 0.576430696837589  |
| 26 119                                           | nuclear-transcribed mRNA catabolic process, nonsense-mediated decay |                          |                    |
| GO:0006413                                       | 4.36141351998054e-36                                                | 71.6115348837209         | 0.736281226212719  |
| 27 152                                           | translational initiation                                            |                          |                    |
| GO:0000956                                       | 9.43996005117733e-35                                                | 62.9631509990174         | 0.818628468618089  |
| 27 169                                           | nuclear-transcribed mRNA catabolic process                          |                          |                    |
| GO:0019080                                       | 2.5199545712287e-34                                                 | 67.392 0.731437270777109 | 26 151             |
| viral genome expression                          |                                                                     |                          |                    |
| GO:0019083                                       | 2.5199545712287e-34                                                 | 67.392 0.731437270777109 | 26 151             |
| viral transcription                              |                                                                     |                          |                    |
| GO:0006612                                       | 3.64064317998685e-34                                                | 66.3214030064424         | 0.741125181648329  |
| 26 153                                           | protein targeting to membrane                                       |                          |                    |
| GO:0043624                                       | 3.64064317998685e-34                                                | 66.3214030064424         | 0.741125181648329  |
| 26 153                                           | cellular protein complex disassembly                                |                          |                    |
| GO:0006402                                       | 4.19636154062652e-34                                                | 59.1729554905283         | 0.862224067538579  |
| 27 178                                           | mRNA catabolic process                                              |                          |                    |
| GO:0043241                                       | 8.92655360355916e-34                                                | 63.7868457300276         | 0.765344958826379  |
| 26 158                                           | protein complex disassembly                                         |                          |                    |
| GO:0034623                                       | 1.29106482638928e-32                                                | 56.8270884520885         | 0.842848245796139  |
| 26 174                                           | cellular macromolecular complex disassembly                         |                          |                    |
| GO:0006401                                       | 2.34022159727951e-32                                                | 50.1020381499869         | 0.993010864300048  |

STable4\_20PerPair

|                                    |           |                       |                                                             |                      |                   |                  |         |          |          |
|------------------------------------|-----------|-----------------------|-------------------------------------------------------------|----------------------|-------------------|------------------|---------|----------|----------|
| 27                                 | 205       | RNA catabolic process | 2.8151867905633e-32                                         | 54.9506833036245     | 0.867068022974189 |                  |         |          |          |
| GO:0032984                         | 26        | 179                   | macromolecular complex disassembly                          | 9.99212004379702e-31 | 47.149897854954   |                  |         |          |          |
| GO:0072594                         | 204       | 26                    | establishment of protein localization to organelle          | 2.85830184933422e-29 | 40.8620842572062  |                  |         |          |          |
| GO:0019058                         | 26        | 231                   | viral infectious cycle                                      | 2.06522322414906e-28 | 34.5080083250385  |                  |         |          |          |
| GO:0071845                         | 27        | 284                   | cellular component disassembly at cellular level            | 3.03273804619751e-28 | 33.9695268644747  |                  |         |          |          |
| GO:0022411                         | 27        | 288                   | cellular component disassembly                              | 6.71787336382133e-28 | 35.7247474747475  |                  |         |          |          |
| GO:0022415                         | 260       |                       | viral reproductive process                                  | 1.10406752191663e-25 | 23.3967749393134  |                  |         |          |          |
| GO:0016032                         | 29        | 451                   | viral reproduction                                          | 1.90883405523007e-22 | 19.6185733653144  |                  |         |          |          |
| GO:0033365                         | 27        | 473                   | protein localization to organelle                           | 2.01814587967951e-22 | 19.5732792258467  |                  |         |          |          |
| GO:0006605                         | 27        | 474                   | protein targeting                                           | 6.65226882536092e-12 | 15.7288888888889  |                  |         |          |          |
| GO:0071843                         | 14        | 239                   | cellular component biogenesis at cellular level             | 4.84441706346201e-11 | 15.2430486593843  |                  |         |          |          |
| GO:0022613                         | 13        | 225                   | ribonucleoprotein complex biogenesis                        | 1.23986568456352e-10 | 19.2425693932695  |                  |         |          |          |
| GO:0042254                         | 11        | 149                   | ribosome biogenesis                                         | 1.64635398508183e-09 | 22.1870578084556  |                  |         |          |          |
| GO:0006364                         | 9         | 104                   | rRNA processing                                             | 2.71939754178963e-09 | 20.8602499594222  |                  |         |          |          |
| GO:0016072                         | 9         | 110                   | rRNA metabolic process                                      | 1.88175089364032e-08 | 85.0177514792899  |                  |         |          |          |
| GO:0042274                         | 5         | 18                    | ribosomal small subunit biogenesis                          | 3.96892570148744e-08 | 12.4482456140351  |                  |         |          |          |
| GO:0034470                         | 10        | 200                   | ncRNA processing                                            | 1.11608774414704e-07 | 9.59897315353211  |                  |         |          |          |
| GO:0034660                         | 11        | 285                   | ncRNA metabolic process                                     | 2.42665430939766e-07 | 108.886363636364  |                  |         |          |          |
| GO:0042273                         | 4         | 12                    | ribosomal large subunit biogenesis                          |                      |                   |                  |         |          |          |
| Tissue: Lung=>Adipose_Subcutaneous |           |                       |                                                             |                      |                   |                  |         |          |          |
| SourceGene: ENSG00000229344.1      |           |                       |                                                             |                      |                   |                  |         |          |          |
| TargetGeneSet:                     |           |                       |                                                             |                      |                   |                  |         |          |          |
| RPS15AP10                          | RP11      | DDI2                  | SDHB                                                        | HSPG2                | RPL11             | RP1              | MEAF6   | PPCS     | RPS8     |
| RPS27                              | ELL2P1    | COPA                  | CEP350                                                      | ARPC5                | RPS7              | NBAS             | BIRC6   | SOS1-IT1 |          |
| CALM2                              | UBC       | GMCL1                 | DGUOK-AS1                                                   | EIF5B                | MZT2B             | H3F3AP4          | COL4A4  | MTF1     |          |
| EFHD1                              | GIGYF2    | SNED1                 | HDLBP                                                       | BRK1                 | RAD54L2           | TMF1             | PCNP    | RPL24    | NDUFB4   |
| PDCD10                             | DNAJC19   | PPP1R2                | HTT                                                         | BOD1L                | OCIAD2            | PPM1K            | RPL34   | NDUFC1   | NIPBL    |
| MRPS36                             | TAF9      | COX7C                 | ERAP1                                                       | SKP1                 | MTND5P11          |                  | SIL1    | NDFIP1   | TMEM14C  |
| WDR11                              | RWDD1     | IGF2R                 | ANKRD61                                                     | STARD3NL             |                   | TRGV5            | ZNF117  | TRIM56   | RPL19P12 |
| NDUFA5                             | DCTN6     | HOOK3                 | ARFGEF1                                                     | POLR2K               | EIF3H             | TG               | RPL8    | CLTA     | RFK      |
| ATP6V1G1                           |           | RPL35                 | UBAC1                                                       | DNLZ                 | SEC16A            | C10orf31         |         | PRINS    | ADRA2A   |
| RPS24                              | RPL27A    | RPS13                 | CKAP5                                                       | BTBD18               | DDB1              | RNASEH2C         |         | SPCS2    | TMEM126B |
| C11orf73                           |           | ATM                   | SDHD                                                        | BACE1                | UBE4A             | ATP5L            | DDX6    | SCAF11   | MLL4     |
| PFDN5                              | NACA      | LRP1                  | GNS                                                         | RBMS1P1              | EEA1              | APAF1            | VPS29   | KNTC1    | N6AMT2   |
| MRP63                              | ESD       | MED4                  | RPL13AP25                                                   |                      | COMMD6            | CCNB1IP1         |         | C14orf21 |          |
| CGRRF1                             | YLPM1     | CCNK                  | VPS39                                                       | DUT                  | SEC11A            | MPG              | NME3    | NDUFB10  | RPS15A   |
| VPS53                              | TLCD2     | WDR81                 | RPL26                                                       | ZSWIM7               | TOM1L2            | RPS7P1           | SUPT6H  | RFFL     | RPL19    |
| RPL27                              | TNRC6C    | ROCK1P1               | C18orf32                                                    |                      | RPS15             | PTPRS            | NDUFA11 | ZNF121   | NDUFB7   |
| SLC35E1                            | ZNF429    | KRTDAP                | EIF3K                                                       | ZNF587               | TMEM230           | MKKS             | CHD6    | RP4      | TSHZ2    |
| ATP5J                              | LINC00310 |                       | DDT                                                         | TTC28                | SLC5A1            | APOBEC3C         |         | DYNLT3   | USP9X    |
| WDR45                              | GNL3L     | COX7B                 | G6PD                                                        | FUNDC2               |                   |                  |         |          |          |
| GOBPID                             | Pvalue    | OddsRatio             | ExpCount                                                    | Count                | Size              | Term             |         |          |          |
| GO:0006614                         | 20        | 105                   | SRP-dependent cotranslational protein targeting to membrane | 3.26207169581812e-20 | 26.1360294117647  | 1.07535810670542 |         |          |          |
| GO:0006613                         |           |                       |                                                             | 3.98659510008024e-20 | 25.8303052325581  | 1.08559961248357 |         |          |          |

Stable4\_20PerPair

|            |     |                                                                     |                                     |
|------------|-----|---------------------------------------------------------------------|-------------------------------------|
| 20         | 106 | cotranslational protein targeting to membrane                       |                                     |
| GO:0045047 |     | 3.98659510008024e-20                                                | 25.8303052325581 1.08559961248357   |
| 20         | 106 | protein targeting to ER                                             |                                     |
| GO:0072599 |     | 3.98659510008024e-20                                                | 25.8303052325581 1.08559961248357   |
| 20         | 106 | establishment of protein localization to endoplasmic reticulum      |                                     |
| GO:0070972 |     | 3.78016822177201e-19                                                | 22.6482780612245 1.20849768182133   |
| 20         | 118 | protein localization to endoplasmic reticulum                       |                                     |
| GO:0006415 |     | 1.33530892782906e-18                                                | 26.9905163329821 0.931977025811363  |
| 18         | 91  | translational termination                                           |                                     |
| GO:0006413 |     | 3.77607043734472e-18                                                | 17.8885616397187 1.55670887827832   |
| 21         | 152 | translational initiation                                            |                                     |
| GO:0006414 |     | 2.00822316971168e-17                                                | 22.6249336870027 1.07535810670542   |
| 18         | 105 | translational elongation                                            |                                     |
| GO:0006612 |     | 7.61369365212001e-17                                                | 16.6470864661654 1.56695038405647   |
| 20         | 153 | protein targeting to membrane                                       |                                     |
| GO:0072594 |     | 1.2786141947727e-16                                                 | 13.5470957613815 2.08926717874196   |
| 22         | 204 | establishment of protein localization to organelle                  |                                     |
| GO:0000184 |     | 2.05224819323133e-16                                                | 19.4696115765423 1.21873918759947   |
| 18         | 119 | nuclear-transcribed mRNA catabolic process, nonsense-mediated decay |                                     |
| GO:0000956 |     | 5.51800123988594e-16                                                | 14.8427013422819 1.73081447650682   |
| 20         | 169 | nuclear-transcribed mRNA catabolic process                          |                                     |
| GO:0019080 |     | 9.77020477086083e-16                                                | 15.8121329574818 1.54646737250017   |
| 19         | 151 | viral genome expression                                             |                                     |
| GO:0019083 |     | 9.77020477086083e-16                                                | 15.8121329574818 1.54646737250017   |
| 19         | 151 | viral transcription                                                 |                                     |
| GO:0006402 |     | 1.53379161530991e-15                                                | 13.9883306962025 1.82298802851014   |
| 20         | 178 | mRNA catabolic process                                              |                                     |
| GO:0006401 |     | 1.89653849367975e-15                                                | 12.6882488873673 2.0995086845201 21 |
| 205        |     | RNA catabolic process                                               |                                     |
| GO:0043624 |     | 1.93095066362258e-14                                                | 14.5312820512821 1.56695038405647   |
| 18         | 153 | cellular protein complex disassembly                                |                                     |
| GO:0043241 |     | 3.41437332424465e-14                                                | 14.0073626373626 1.6181579129472 18 |
| 158        |     | protein complex disassembly                                         |                                     |
| GO:0034623 |     | 1.85821896107544e-13                                                | 12.5565088757396 1.78202200539755   |
| 18         | 174 | cellular macromolecular complex disassembly                         |                                     |
| GO:0019058 |     | 2.32531915226996e-13                                                | 10.4354265402844 2.36578783475192   |
| 20         | 231 | viral infectious cycle                                              |                                     |
| GO:0032984 |     | 3.04275127705642e-13                                                | 12.1622551361682 1.83322953428828   |
| 18         | 179 | macromolecular complex disassembly                                  |                                     |
| GO:0033365 |     | 1.97347455481443e-12                                                | 6.60608061026149 4.84423223306346   |
| 26         | 473 | protein localization to organelle                                   |                                     |
| GO:0022415 |     | 2.12750949238825e-12                                                | 9.15559895833333 2.66279150231818   |
| 20         | 260 | viral reproductive process                                          |                                     |
| GO:0006605 |     | 1.36183104177285e-11                                                | 6.27138899451355 4.8544737388416 25 |
| 474        |     | protein targeting                                                   |                                     |
| GO:0022904 |     | 1.55909165751853e-11                                                | 16.4979919678715 0.983184554702097  |
| 13         | 96  | respiratory electron transport chain                                |                                     |
| GO:0071845 |     | 6.95920595890273e-10                                                | 7.30670908039329 2.9085876409937 18 |
| 284        |     | cellular component disassembly at cellular level                    |                                     |
| GO:0022411 |     | 8.7144524615395e-10                                                 | 7.19641025641026 2.94955366410629   |
| 18         | 288 | cellular component disassembly                                      |                                     |
| GO:0022900 |     | 1.09587499561989e-09                                                | 11.2865625956535 1.37236177427168   |
| 13         | 134 | electron transport chain                                            |                                     |
| GO:0016032 |     | 1.14150660593146e-09                                                | 5.64672364672365 4.61891910594422   |
| 22         | 451 | viral reproduction                                                  |                                     |
| GO:0045333 |     | 2.24881783961179e-09                                                | 10.5806488659202 1.45429382049685   |
| 13         | 142 | cellular respiration                                                |                                     |
| GO:0015980 |     | 2.41573730619789e-09                                                | 6.71418685121107 3.14414227389108   |
| 18         | 307 | energy derivation by oxidation of organic compounds                 |                                     |
| GO:0006091 |     | 3.86827183404706e-07                                                | 4.69181988742964 4.38336447304685   |
| 18         | 428 | generation of precursor metabolites and energy                      |                                     |
| GO:0042773 |     | 9.1887131465248e-06                                                 | 14.6980419099966 0.481350771572902  |
| 6          | 47  | ATP synthesis coupled electron transport                            |                                     |

Stable4\_20PerPair

GO:0042775 7.91887131465248e-06 14.6980419099966 0.481350771572902  
6 47 mitochondrial ATP synthesis coupled electron transport  
Tissue: Adipose\_Subcutaneous=>Lung Type: asymmetric  
SourceGene: ENSG00000232098.1  
TargetGeneSet: RPL22 SPEN KIAA0090 RPL11 CSF3R RPS8 UQCRH RP4  
CSR3 RPL5 CDC14A RPS27 RAB4A RPS7 TCEB1P21 RPL31 MIR1302-3  
ILKAP RPL32 RPL15 RPL29 CNBP ANAPC13 RP11 RPL35A RPL34 ACSL1 BTF3  
TBCA HINT1 CTB ZNF300 HIGD2A TMEM14C MDC1 CUTA USP49 RWDD1  
TNFAIP3 HAUS6P1 NAMPT DOCK5 TCEA1 KIAA1429 RPL30 MRPL41 POLR3A  
RPS24 RPS3AP5 IFITM2 EIF3F RPL27A RPS13 C11orf31 UBXN1 PRDX5 FAU  
AIP ATP5L RPS25 C12orf57 IRAK4 NACA IRAK3 ISCU C12orf47  
USP12 MTIF3 TPT1 CHD8 TRAV41 RPL36A RPL7AP6 C14orf142 FAN1  
RPAP1 LYSMD2 RPL4 SEC11A NDUFB10 ECI1 RPS15A PRSS53 GPR97 SPAG7  
LSMD1 RPL26 C17orf48 RPS7P1 RPL17 RPL19 MYL12B GPX4 RPS15 AES  
C19orf43 C19orf55 RPL18 RPS11 FPR2 C22orf32 TBC1D22A  
IGBP1 RPS4X  
GOBPID Pvalue OddsRatio ExpCount Count Size Term  
GO:0006614 1.30157353101289e-40 96.2424242424242 0.595806518580029  
28 105 SRP-dependent cotranslational protein targeting to membrane  
GO:0006415 1.42773035295904e-40 109.725852272727 0.516365649436025  
27 91 translational termination  
GO:0006613 1.76237998532743e-40 95.0018993352327 0.601480866376029  
28 106 cotranslational protein targeting to membrane  
GO:0045047 1.76237998532743e-40 95.0018993352327 0.601480866376029  
28 106 protein targeting to ER  
GO:0072599 1.76237998532743e-40 95.0018993352327 0.601480866376029  
28 106 establishment of protein localization to endoplasmic reticulum  
GO:0070972 5.25504361418136e-39 82.2658436213992 0.669573039928033  
28 118 protein localization to endoplasmic reticulum  
GO:0006414 1.21496653414584e-38 89.9433566433566 0.595806518580029  
27 105 translational elongation  
GO:0006413 2.07569771424529e-37 63.373830342077 0.862500864992042 29  
152 translational initiation  
GO:0000184 5.41404405242449e-37 76.1816205533597 0.675247387724033  
27 119 nuclear-transcribed mRNA catabolic process, nonsense-mediated decay  
GO:0019080 1.04959904748575e-35 60.0554049984944 0.856826517196042  
28 151 viral genome expression  
GO:0019083 1.04959904748575e-35 60.0554049984944 0.856826517196042  
28 151 viral transcription  
GO:0006612 1.56335148583073e-35 59.0862222222222 0.868175212788042  
28 153 protein targeting to membrane  
GO:0032984 3.40885401343939e-35 51.8680503144654 1.01570825548405  
29 179 macromolecular complex disassembly  
GO:0043241 4.12806040857741e-35 56.7937321937322 0.896546951768044  
28 158 protein complex disassembly  
GO:0034623 7.42987953103547e-34 50.5129375951294 0.987336516504048  
28 174 cellular macromolecular complex disassembly  
GO:0043624 9.00678986623874e-34 55.4922077922078 0.868175212788042  
27 153 cellular protein complex disassembly  
GO:0072594 1.88099283904718e-33 44.3801617250674 1.15756695038406  
29 204 establishment of protein localization to organelle  
GO:0000956 1.58933499772773e-32 49.1842509603073 0.958964777524047  
27 169 nuclear-transcribed mRNA catabolic process  
GO:0006402 7.01366727036605e-32 46.2234798314269 1.01003390768805  
27 178 mRNA catabolic process  
GO:0019058 3.04048001079587e-30 36.183908045977 1.31077434087606 28  
231 viral infectious cycle  
GO:0006401 3.82648578122869e-30 39.1375893769152 1.16324129818006  
27 205 RNA catabolic process  
GO:0022411 5.75479917681415e-29 29.8091352808334 1.63421216524808  
29 288 cellular component disassembly  
GO:0022415 9.13227108067185e-29 31.5961047254151 1.47533042696007  
28 260 viral reproductive process

Stable4\_20PerPair

|                                                                 |                                                     |                                                                     |                    |
|-----------------------------------------------------------------|-----------------------------------------------------|---------------------------------------------------------------------|--------------------|
| GO:0071845                                                      | 1.13022894149101e-27                                | 28.5853587962963                                                    | 1.61151477406408   |
| 28                                                              | 284                                                 | cellular component disassembly at cellular level                    |                    |
| GO:0033365                                                      | 9.31581315988051e-23                                | 17.1606748257692                                                    | 2.68396650750813   |
| 29                                                              | 473                                                 | protein localization to organelle                                   |                    |
| GO:0006605                                                      | 9.88664938193443e-23                                | 17.1208819164723                                                    | 2.68964085530413   |
| 29                                                              | 474                                                 | protein targeting                                                   |                    |
| GO:0016032                                                      | 4.31396126097778e-22                                | 17.0951755538044                                                    | 2.55913085599612   |
| 28                                                              | 451                                                 | viral reproduction                                                  |                    |
| GO:0042274                                                      | 4.20414596204079e-08                                | 71.7082917082917                                                    | 0.102138260328005  |
| 5                                                               | 18                                                  | ribosomal small subunit biogenesis                                  |                    |
| GO:0006364                                                      | 1.25804355440942e-07                                | 16.0731981981982                                                    | 0.590132170784029  |
| 8                                                               | 104                                                 | rRNA processing                                                     |                    |
| GO:0042254                                                      | 1.59632331877313e-07                                | 12.5304305283757                                                    | 0.845477821604041  |
| 9                                                               | 149                                                 | ribosome biogenesis                                                 |                    |
| GO:0016072                                                      | 1.94699862244784e-07                                | 15.1213566507684                                                    | 0.62417825756003   |
| 8                                                               | 110                                                 | rRNA metabolic process                                              |                    |
| GO:0042273                                                      | 4.6044454228744e-07                                 | 92.0576923076923                                                    | 0.0680921735520033 |
| 4                                                               | 12                                                  | ribosomal large subunit biogenesis                                  |                    |
| GO:0022613                                                      | 5.50957393660927e-07                                | 9.14341085271318                                                    | 1.27672825410006   |
| 10                                                              | 225                                                 | ribonucleoprotein complex biogenesis                                |                    |
| GO:0071843                                                      | 9.56637484526541e-07                                | 8.57593401261524                                                    | 1.35616912324407   |
| 10                                                              | 239                                                 | cellular component biogenesis at cellular level                     |                    |
| GO:0034470                                                      | 1.73618969894452e-05                                | 7.98254504504505                                                    | 1.13486955920006   |
| 8                                                               | 200                                                 | ncRNA processing                                                    |                    |
| Tissue: Adipose                                                 | Subcutaneous=>Lung                                  | Type: cluster                                                       |                    |
| SourceGene:                                                     | HBE1(ENSG00000213931.1)                             |                                                                     |                    |
| TargetGeneSet:                                                  | DDX11L1 RP11 RPL22 PIK3CD RPL11 RP4 UQCRH LRP8 RPL5 |                                                                     |                    |
| NENF MFSD2B UBC CCDC104 RPL31 DDX11L2 CXCR2P1 RPL24 KLHL6-AS1   |                                                     |                                                                     |                    |
| RPL35A HTT RPL34 CDC20B BTF3 RFESD EPB41L4A-AS1 U6 TRIM40       |                                                     |                                                                     |                    |
| LY6G6F C6orf25 RPL10A RPL24P4 TOMM7 CTD RPL30 TLN1 EDF1 PTGDS   |                                                     |                                                                     |                    |
| RPL27A RPS13 PTPRJ UBXN1 SYT12 ARAP1-AS2 RPS25 C12orf57         |                                                     |                                                                     |                    |
| KCTD4 TPT1 HS6ST3 HERC1 RPS15A C16orf74 GP1BA SLC46A1 CCR10     |                                                     |                                                                     |                    |
| ITGA2B PRKCA GLTSCR2 RPS11 SNORD88B LINC00493 WFDC12 PPPDE2 UXT |                                                     |                                                                     |                    |
| IGBP1 RPL39                                                     |                                                     |                                                                     |                    |
| GOBPID                                                          | Pvalue                                              | OddsRatio                                                           | ExpCount           |
| GO:0006415                                                      | 5.51818513167869e-25                                | 109.19619047619                                                     | 0.277074250916892  |
| 91                                                              | 105                                                 | translational termination                                           | 16                 |
| GO:0006414                                                      | 6.46485337105153e-24                                | 91.9293739967897                                                    | 0.31970105875026   |
| 16                                                              | 105                                                 | translational elongation                                            |                    |
| GO:0006614                                                      | 6.46485337105153e-24                                | 91.9293739967897                                                    | 0.31970105875026   |
| 16                                                              | 105                                                 | SRP-dependent cotranslational protein targeting to membrane         |                    |
| GO:0006613                                                      | 7.60018665220828e-24                                | 90.9015873015873                                                    | 0.322745830738357  |
| 16                                                              | 106                                                 | cotranslational protein targeting to membrane                       |                    |
| GO:0045047                                                      | 7.60018665220828e-24                                | 90.9015873015873                                                    | 0.322745830738357  |
| 16                                                              | 106                                                 | protein targeting to ER                                             |                    |
| GO:0072599                                                      | 7.60018665220828e-24                                | 90.9015873015873                                                    | 0.322745830738357  |
| 16                                                              | 106                                                 | establishment of protein localization to endoplasmic reticulum      |                    |
| GO:0070972                                                      | 4.69496705520481e-23                                | 80.140056022409                                                     | 0.35928309459553   |
| 118                                                             | 118                                                 | protein localization to endoplasmic reticulum                       | 16                 |
| GO:0000184                                                      | 5.41431967622629e-23                                | 79.3564493758668                                                    | 0.362327866583627  |
| 16                                                              | 119                                                 | nuclear-transcribed mRNA catabolic process, nonsense-mediated decay |                    |
| GO:0019080                                                      | 2.90778262073247e-21                                | 60.410582010582                                                     | 0.459760570202754  |
| 151                                                             | 151                                                 | viral genome expression                                             | 16                 |
| GO:0019083                                                      | 2.90778262073247e-21                                | 60.410582010582                                                     | 0.459760570202754  |
| 151                                                             | 151                                                 | viral transcription                                                 | 16                 |
| GO:0006413                                                      | 3.24389404359499e-21                                | 59.9621848739496                                                    | 0.462805342190852  |
| 16                                                              | 152                                                 | translational initiation                                            |                    |
| GO:0006612                                                      | 3.61607575891177e-21                                | 59.5203336809176                                                    | 0.46585011417895   |
| 16                                                              | 153                                                 | protein targeting to membrane                                       |                    |
| GO:0043624                                                      | 3.61607575891177e-21                                | 59.5203336809176                                                    | 0.46585011417895   |
| 16                                                              | 153                                                 | cellular protein complex disassembly                                |                    |
| GO:0043241                                                      | 6.15518583250217e-21                                | 57.4044265593561                                                    | 0.481073974119438  |
| 16                                                              | 158                                                 | protein complex disassembly                                         |                    |

Stable4\_20PerPair

|                                    |                            |                                                    |                    |
|------------------------------------|----------------------------|----------------------------------------------------|--------------------|
| GO:0072594                         | 8.79035658425368e-21       | 47.8787878787879                                   | 0.621133485571933  |
| 17                                 | 204                        | establishment of protein localization to organelle |                    |
| GO:0000956                         | 1.86655759439021e-20       | 53.2362278244631                                   | 0.514566465988513  |
| 16                                 | 169                        | nuclear-transcribed mRNA catabolic process         |                    |
| GO:0034623                         | 3.01350515566819e-20       | 51.5334538878843                                   | 0.529790325929001  |
| 16                                 | 174                        | cellular macromolecular complex disassembly        |                    |
| GO:0006402                         | 4.3747520852651e-20        | 50.2469135802469                                   | 0.541969413881392  |
| 16                                 | 178                        | mRNA catabolic process                             |                    |
| GO:0032984                         | 4.79532045155869e-20       | 49.9351446099912                                   | 0.54501418586949   |
| 16                                 | 179                        | macromolecular complex disassembly                 |                    |
| GO:0006401                         | 4.37959984370942e-19       | 42.9871504157218                                   | 0.62417825756003   |
| 16                                 | 205                        | RNA catabolic process                              |                    |
| GO:0019058                         | 3.02228381570828e-18       | 37.7196013289037                                   | 0.703342329250571  |
| 16                                 | 231                        | viral infectious cycle                             |                    |
| GO:0022415                         | 2.01868487634857e-17       | 33.1686182669789                                   | 0.791640716905404  |
| 16                                 | 260                        | viral reproductive process                         |                    |
| GO:0071845                         | 8.2577947910492e-17        | 30.1471215351812                                   | 0.864715244619749  |
| 16                                 | 284                        | cellular component disassembly at cellular level   |                    |
| GO:0022411                         | 1.03150092486073e-16       | 29.6953781512605                                   | 0.87689433257214   |
| 16                                 | 288                        | cellular component disassembly                     |                    |
| GO:0033365                         | 6.33950229792127e-16       | 21.228740490279                                    | 1.44017715037022   |
| 473                                |                            | protein localization to organelle                  | 18                 |
| GO:0006605                         | 6.57817992612401e-16       | 21.1806680161943                                   | 1.44322192235831   |
| 18                                 | 474                        | protein targeting                                  |                    |
| GO:0016032                         | 1.16227648846917e-13       | 18.3540229885057                                   | 1.37319216663207   |
| 16                                 | 451                        | viral reproduction                                 |                    |
| GO:0042273                         | 5.68413960043026e-06       | 117.056910569106                                   | 0.0365372638571725 |
| 3                                  | 12                         | ribosomal large subunit biogenesis                 |                    |
| Tissue: Lung=>Adipose_Subcutaneous | Type: cluster              |                                                    |                    |
| SourceGene:                        | HSPB1P2(ENSG00000230216.1) |                                                    |                    |
| TargetGeneSet:                     | RPS6KA1                    | SYTL1                                              | Clorf38            |
| ARGGAP30                           | PTPRC                      | ADIPOR1                                            | MERTK              |
| P2RY13                             | RPL7L1P8                   | TLR1                                               | TXK                |
| DOCK2                              | GRK6                       | DOK3                                               | DEFA6              |
| SYK                                | CARD9                      | MRC1                                               | FAM21C             |
| KCNQ1OT1                           |                            | MS4A6A                                             | MS4A4E             |
| CRTAM                              | PTPN6                      | CD163                                              | C3AR1              |
| ADCY7                              | RNF166                     | CXCL16                                             | PIK3R5             |
| MAN2B1                             | LRRRC25                    | GMIP                                               | HCST               |
| LILRA2                             | LILRB1                     | LILRB4                                             | CASS4              |
| GOBPID                             | Pvalue                     | OddsRatio                                          | ExpCount           |
| GO:0002764                         | 2.83025612685634e-10       | 13.0396453900709                                   | Count              |
| 13                                 | 248                        | immune response-regulating signaling pathway       | Size               |
| GO:0002757                         | 1.9787310374037e-09        | 12.4869514077777                                   | Term               |
| 12                                 | 235                        | immune response-activating signal transduction     |                    |
| GO:0050778                         | 2.9229016976017e-08        | 8.65864197530864                                   |                    |
| 13                                 | 364                        | positive regulation of immune response             |                    |
| GO:0002253                         | 2.94324989621189e-08       | 9.65853658536585                                   |                    |
| 12                                 | 299                        | activation of immune response                      |                    |
| GO:0042110                         | 5.99918653887682e-08       | 9.01650024029476                                   |                    |
| 12                                 | 319                        | T cell activation                                  |                    |
| GO:0045088                         | 1.18297775136088e-07       | 10.9740611691831                                   |                    |
| 10                                 | 215                        | regulation of innate immune response               |                    |
| GO:0001817                         | 2.1639261029611e-07        | 7.95445741011953                                   |                    |
| 12                                 | 359                        | regulation of cytokine production                  |                    |
| GO:0046649                         | 2.20399140272921e-07       | 7.20055555555556                                   |                    |
| 13                                 | 433                        | lymphocyte activation                              |                    |
| GO:0050867                         | 3.28882310531892e-07       | 9.7639751552795                                    | 1.21237284616982   |
| 240                                |                            | positive regulation of cell activation             | 10                 |
| GO:0002252                         | 4.70331852634171e-07       | 7.36600333128781                                   |                    |
| 12                                 | 386                        | immune effector process                            |                    |
| GO:0001816                         | 6.00831906475875e-07       | 7.18828917519154                                   |                    |
| 12                                 | 395                        | cytokine production                                |                    |



Stable4\_20PerPair

|                                                                      |                      |                                                                    |                   |          |          |                                              |         |         |         |                    |
|----------------------------------------------------------------------|----------------------|--------------------------------------------------------------------|-------------------|----------|----------|----------------------------------------------|---------|---------|---------|--------------------|
| GO:0002768                                                           | 6.22527330396889e-07 | 12.8886877828054                                                   | 0.727423707701889 |          |          |                                              |         |         |         |                    |
| 8                                                                    | 144                  | immune response-regulating cell surface receptor signaling pathway |                   |          |          |                                              |         |         |         |                    |
| GO:0051251                                                           | 1.28561864970946e-06 | 9.67445388349515                                                   | 1.08608400802713  |          |          |                                              |         |         |         |                    |
| 9                                                                    | 215                  | positive regulation of lymphocyte activation                       |                   |          |          |                                              |         |         |         |                    |
| GO:0050870                                                           | 2.28002046053706e-06 | 10.7333647947145                                                   | 0.863815652895993 |          |          |                                              |         |         |         |                    |
| 8                                                                    | 171                  | positive regulation of T cell activation                           |                   |          |          |                                              |         |         |         |                    |
| GO:0002696                                                           | 2.49899579738861e-06 | 8.8857421875                                                       | 1.17701197148986  | 9        |          |                                              |         |         |         |                    |
| 233                                                                  |                      | positive regulation of leukocyte activation                        |                   |          |          |                                              |         |         |         |                    |
| GO:0050851                                                           | 2.78889692962869e-06 | 13.0399686520376                                                   | 0.62134108366203  |          |          |                                              |         |         |         |                    |
| 7                                                                    | 123                  | antigen receptor-mediated signaling pathway                        |                   |          |          |                                              |         |         |         |                    |
| GO:0046631                                                           | 3.48609898204514e-06 | 16.8523173605656                                                   | 0.41422738910802  |          |          |                                              |         |         |         |                    |
| 6                                                                    | 82                   | alpha-beta T cell activation                                       |                   |          |          |                                              |         |         |         |                    |
| GO:0002429                                                           | 4.69291948171638e-06 | 11.996632996633                                                    | 0.671856618919106 | 7        |          |                                              |         |         |         |                    |
| 133                                                                  |                      | immune response-activating cell surface receptor signaling pathway |                   |          |          |                                              |         |         |         |                    |
| GO:0031347                                                           | 5.20921106174128e-06 | 6.33006912442396                                                   | 2.03577607086015  |          |          |                                              |         |         |         |                    |
| 11                                                                   | 403                  | regulation of defense response                                     |                   |          |          |                                              |         |         |         |                    |
| GO:0042035                                                           | 6.4028684164143e-06  | 15.0584723441615                                                   | 0.459691370839388 |          |          |                                              |         |         |         |                    |
| 6                                                                    | 91                   | regulation of cytokine biosynthetic process                        |                   |          |          |                                              |         |         |         |                    |
| GO:0002697                                                           | 7.55348514979535e-06 | 9.04583499402152                                                   | 1.01536225866722  |          |          |                                              |         |         |         |                    |
| 8                                                                    | 201                  | regulation of immune effector process                              |                   |          |          |                                              |         |         |         |                    |
| GO:0050865                                                           | 8.19942858096007e-06 | 6.69479002812336                                                   | 1.73268285931769  |          |          |                                              |         |         |         |                    |
| 10                                                                   | 343                  | regulation of cell activation                                      |                   |          |          |                                              |         |         |         |                    |
| GO:0002699                                                           | 8.72980708353583e-06 | 14.2169154228856                                                   | 0.484949138467926 |          |          |                                              |         |         |         |                    |
| 6                                                                    | 96                   | positive regulation of immune effector process                     |                   |          |          |                                              |         |         |         |                    |
| GO:0042089                                                           | 1.10482670915257e-05 | 13.6081295649413                                                   | 0.505155352570756 |          |          |                                              |         |         |         |                    |
| 6                                                                    | 100                  | cytokine biosynthetic process                                      |                   |          |          |                                              |         |         |         |                    |
| GO:0051249                                                           | 1.20945271920179e-05 | 7.23859489051095                                                   | 1.42958964777524  |          |          |                                              |         |         |         |                    |
| 9                                                                    | 283                  | regulation of lymphocyte activation                                |                   |          |          |                                              |         |         |         |                    |
| GO:0042107                                                           | 1.23813915098647e-05 | 13.3227611940299                                                   | 0.515258459622171 |          |          |                                              |         |         |         |                    |
| 6                                                                    | 102                  | cytokine metabolic process                                         |                   |          |          |                                              |         |         |         |                    |
| GO:0050853                                                           | 1.29351108289805e-05 | 33.2823188405797                                                   | 0.146495052245519 |          |          |                                              |         |         |         |                    |
| 4                                                                    | 29                   | B cell receptor signaling pathway                                  |                   |          |          |                                              |         |         |         |                    |
| GO:0045089                                                           | 1.3959425733553e-05  | 10.0602020202020                                                   | 0.793093903536087 | 7        |          |                                              |         |         |         |                    |
| 157                                                                  |                      | positive regulation of innate immune response                      |                   |          |          |                                              |         |         |         |                    |
| GO:0050863                                                           | 1.50818786243891e-05 | 8.18490429758035                                                   | 1.11639332918137  |          |          |                                              |         |         |         |                    |
| 8                                                                    | 221                  | regulation of T cell activation                                    |                   |          |          |                                              |         |         |         |                    |
| Tissue: Lung=>Adipose_Subcutaneous Type: asymmetric                  |                      |                                                                    |                   |          |          |                                              |         |         |         |                    |
| SourceGene: MARCH10(ENSG00000173838.6)                               |                      |                                                                    |                   |          |          |                                              |         |         |         |                    |
| TargetGeneSet: TNFRSF4 C1QC RPS6KA1 C1orf38 LAPTM5 CSF3R MCOLN2 CD53 |                      |                                                                    |                   |          |          |                                              |         |         |         |                    |
| ADORA3                                                               | ARHGEF11             | MNDA                                                               | SLAMF8            | CD84     | ARHGAP30 | FCGR2A                                       | FCGR3A  |         |         |                    |
| POU2F1                                                               | SELL                 | RP11                                                               | PTPRC             | CR1      | WDR26    | GJC2                                         | NLRC4   | PLEK    | VAMP8   |                    |
| MERTK                                                                | TFCP2L1              | SLC11A1                                                            | CAB39             | CDCP1    | HCLS1    | CD86                                         | P2RY1   | PHC3    | ATP11B  | TFRC               |
| HTT                                                                  | TLR1                 | RBM47                                                              | WDFY3             | SNCA     | DAPP1    | C4orf21                                      | FAM105A | FYB     | GM2A    |                    |
| HAVCR2                                                               | DOCK2                | DOK3                                                               | ZNF192            | AIF1     | GPSM3    | DEFA6                                        | TTYH3   | AOAH    | AKAP9   |                    |
| PILRA                                                                | TFEC                 | IRF5                                                               | TBXAS1            | MSR1     | DOK2     | DOCK5                                        | CTD     | VPS13B  | UBR5    | SLA                |
| HEATR7A                                                              | SYK                  | FBP1                                                               | FKBP15            | CARD9    | C10orf31 |                                              | MRC1    | WDFY4   | PIK3AP1 |                    |
| PTPRE                                                                | MUC6                 | RP13                                                               | COMMD9            | PTPRJ    | MS4A6A   | MS4A7                                        | MS4A6E  | CCDC88B | UNC93B5 |                    |
| SLCO2B1                                                              | MYO7A                | IL10RA                                                             | IFT46             | C11orf45 |          | PTPN6                                        | CD163   | M6PR    | CLEC7A  | BIN2               |
| NCKAP1L                                                              | ARHGAP9              | MAPKAPK5                                                           |                   | GLT1D1   | LCP1     | PLCB2                                        | DMXL2   | AQP9    | DENND4A |                    |
| FANCI                                                                | PRKCB                | APOBR                                                              | C16orf54          |          | CORO1A   | ATP6V0D1                                     |         | ZZEF1   | ARRB2   |                    |
| SNORA48                                                              | CD68                 | PIK3R5                                                             | LGALS9            | CD300A   | HMHA1    | C19orf59                                     |         | CD209   | PRAM1   |                    |
| MYO1F                                                                | MAN2B1               | KLF2                                                               | IFI30             | LRRC25   | GMIP     | ZNF714                                       | SPINT2  | RASGRP4 | PLD3    |                    |
| CEACAM4                                                              | CD37                 | SIGLEC7                                                            | FPR2              | LILRB2   | LILRB1   | ZIM2                                         | SIGLEC1 | HCK     | MMP9    |                    |
| CRYBB1                                                               | CYTH4                | SH3BP1                                                             | TLR8              | OFD1     | CYBB     | WAS                                          | VSIG4   | BTK     | RP4     |                    |
| ARHGAP4                                                              |                      |                                                                    |                   |          |          |                                              |         |         |         |                    |
| GOBPID                                                               | Pvalue               | OddsRatio                                                          | ExpCount          | Count    | Size     | Term                                         |         |         |         |                    |
| GO:0002764                                                           | 248                  | 3.17525917561392e-12                                               | 10.5078260869565  |          |          | immune response-regulating signaling pathway |         |         |         | 2.1108573801121 18 |
| GO:0050778                                                           | 21                   | 3.5639430893975e-12                                                | 8.39435774309724  |          |          | positive regulation of immune response       |         |         |         | 3.09819389661615   |
| GO:0002253                                                           | 19                   | 7.88480122848184e-12                                               | 9.16593406593407  |          |          | activation of immune response                |         |         |         | 2.54494498650612   |
| GO:0050865                                                           |                      | 8.50416276958404e-11                                               | 7.89636752136752  |          |          |                                              |         |         |         | 2.91945194104214   |

Stable4\_20PerPair

|                                                |     |                                                                    |                   |                  |                   |     |
|------------------------------------------------|-----|--------------------------------------------------------------------|-------------------|------------------|-------------------|-----|
| 19                                             | 343 | regulation of cell activation                                      |                   |                  |                   |     |
| GO:0002252                                     |     | 8.5223353516287e-11                                                | 7.40728951137991  |                  | 3.28544737388416  |     |
| 20                                             | 386 | immune effector process                                            |                   |                  |                   |     |
| GO:0002757                                     |     | 1.45183016632472e-10                                               | 9.6335936499808   | 2.0002075980901  | 16                | 235 |
| immune response-activating signal transduction |     |                                                                    |                   |                  |                   |     |
| GO:0042098                                     |     | 3.34398676056419e-10                                               | 14.50484444671086 |                  | 1.00435955989205  |     |
| 12                                             | 118 | T cell proliferation                                               |                   |                  |                   |     |
| GO:0046649                                     |     | 6.46625481834432e-10                                               | 6.54223183431674  |                  | 3.68548889350218  |     |
| 20                                             | 433 | lymphocyte activation                                              |                   |                  |                   |     |
| GO:0042110                                     |     | 1.64901707330439e-09                                               | 7.44851930526053  |                  | 2.71517542038613  |     |
| 17                                             | 319 | T cell activation                                                  |                   |                  |                   |     |
| GO:0002694                                     |     | 1.8131862504206e-09                                                | 7.39846077457795  |                  | 2.73219846377413  |     |
| 17                                             | 321 | regulation of leukocyte activation                                 |                   |                  |                   |     |
| GO:0046651                                     |     | 2.40778009111816e-09                                               | 10.5315608919383  |                  | 1.46398173136807  |     |
| 13                                             | 172 | lymphocyte proliferation                                           |                   |                  |                   |     |
| GO:0032943                                     |     | 2.77379799910712e-09                                               | 10.3992659514399  |                  | 1.48100477475607  |     |
| 13                                             | 174 | mononuclear cell proliferation                                     |                   |                  |                   |     |
| GO:0002768                                     |     | 3.37344018686564e-09                                               | 11.6265356265356  |                  | 1.22565912393606  |     |
| 12                                             | 144 | immune response-regulating cell surface receptor signaling pathway |                   |                  |                   |     |
| GO:0070661                                     |     | 4.79816032963925e-09                                               | 9.9013986013986   | 1.54909694830808 |                   | 13  |
| 182                                            |     | leukocyte proliferation                                            |                   |                  |                   |     |
| GO:0006897                                     |     | 5.3768325469158e-09                                                | 6.84537505752416  |                  | 2.93647498443014  |     |
| 17                                             | 345 | endocytosis                                                        |                   |                  |                   |     |
| GO:0050670                                     |     | 3.89120289605634e-08                                               | 10.4823442534909  |                  | 1.22565912393606  |     |
| 11                                             | 144 | regulation of lymphocyte proliferation                             |                   |                  |                   |     |
| GO:0032944                                     |     | 4.18065378295491e-08                                               | 10.4033848614072  |                  | 1.23417064563006  |     |
| 11                                             | 145 | regulation of mononuclear cell proliferation                       |                   |                  |                   |     |
| GO:0070663                                     |     | 5.93542564562744e-08                                               | 10.0256294964029  |                  | 1.27672825410006  |     |
| 11                                             | 150 | regulation of leukocyte proliferation                              |                   |                  |                   |     |
| GO:0006954                                     |     | 6.94440190076239e-08                                               | 5.36061776061776  |                  | 3.93232302262819  |     |
| 18                                             | 462 | inflammatory response                                              |                   |                  |                   |     |
| GO:0051249                                     |     | 1.26540204035743e-07                                               | 6.71279969987381  |                  | 2.40876063940212  |     |
| 14                                             | 283 | regulation of lymphocyte activation                                |                   |                  |                   |     |
| GO:0050867                                     |     | 1.28847622001187e-07                                               | 7.34132959551462  |                  | 2.0427652065601   | 13  |
| 240                                            |     | positive regulation of cell activation                             |                   |                  |                   |     |
| GO:0050853                                     |     | 1.36117103737063e-07                                               | 31.8952062430323  |                  | 0.246834129126012 |     |
| 6                                              | 29  | B cell receptor signaling pathway                                  |                   |                  |                   |     |
| GO:0002697                                     |     | 1.40749861590465e-07                                               | 8.08751608751609  |                  | 1.71081586049408  |     |
| 12                                             | 201 | regulation of immune effector process                              |                   |                  |                   |     |
| GO:0042129                                     |     | 1.88840355589208e-07                                               | 12.2162471395881  |                  | 0.859663691094042 |     |
| 9                                              | 101 | regulation of T cell proliferation                                 |                   |                  |                   |     |
| GO:0002429                                     |     | 1.92794548484794e-07                                               | 10.2201597237211  |                  | 1.13203238530206  |     |
| 10                                             | 133 | immune response-activating cell surface receptor signaling pathway |                   |                  |                   |     |
| GO:0001816                                     |     | 2.35237047731635e-07                                               | 5.50351392005524  |                  | 3.36205106913016  |     |
| 16                                             | 395 | cytokine production                                                |                   |                  |                   |     |
| GO:0045088                                     |     | 2.92116919480973e-07                                               | 7.5223006257489   | 1.82997716421009 |                   | 12  |
| 215                                            |     | regulation of innate immune response                               |                   |                  |                   |     |
| GO:0001817                                     |     | 3.89407282254098e-07                                               | 5.64599483204134  |                  | 3.05563628814615  |     |
| 15                                             | 359 | regulation of cytokine production                                  |                   |                  |                   |     |
| GO:0006909                                     |     | 6.674296027887e-07                                                 | 12.7090301003344  |                  | 0.731990865684036 |     |
| 8                                              | 86  | phagocytosis                                                       |                   |                  |                   |     |
| GO:0050764                                     |     | 7.43106896175798e-07                                               | 22.9102564102564  |                  | 0.323437824372016 |     |
| 6                                              | 38  | regulation of phagocytosis                                         |                   |                  |                   |     |
| GO:0050851                                     |     | 1.01746170274446e-06                                               | 9.84349030470914  |                  | 1.04691716836205  |     |
| 9                                              | 123 | antigen receptor-mediated signaling pathway                        |                   |                  |                   |     |
| GO:0002443                                     |     | 1.82900287747965e-06                                               | 6.93785714285714  |                  | 1.79593107743409  |     |
| 11                                             | 211 | leukocyte mediated immunity                                        |                   |                  |                   |     |
| GO:0051251                                     |     | 2.19631347999062e-06                                               | 6.79989495798319  |                  | 1.82997716421009  |     |
| 11                                             | 215 | positive regulation of lymphocyte activation                       |                   |                  |                   |     |
| GO:0050863                                     |     | 2.86867805888058e-06                                               | 6.60280612244898  |                  | 1.88104629437409  |     |
| 11                                             | 221 | regulation of T cell activation                                    |                   |                  |                   |     |
| GO:0002274                                     |     | 3.5334009097762e-06                                                | 9.99841897233201  |                  | 0.910732821258044 |     |
| 8                                              | 107 | myeloid leukocyte activation                                       |                   |                  |                   |     |

Stable4\_20PerPair

|                                                                      |                                              |                                                       |                    |          |          |                  |         |         |         |      |
|----------------------------------------------------------------------|----------------------------------------------|-------------------------------------------------------|--------------------|----------|----------|------------------|---------|---------|---------|------|
| GO:0002696                                                           | 4.77291829778004e-06                         | 6.2405888030888                                       | 1.9831845547021    | 11       | 233      |                  |         |         |         |      |
| positive regulation of leukocyte activation                          |                                              |                                                       |                    |          |          |                  |         |         |         |      |
| GO:0001911                                                           | 5.94319790784005e-06                         | 179.075                                               | 0.0425576084700021 | 3        | 5        |                  |         |         |         |      |
| negative regulation of leukocyte mediated cytotoxicity               |                                              |                                                       |                    |          |          |                  |         |         |         |      |
| GO:0030100                                                           | 7.33596052824878e-06                         | 8.99162055335968                                      | 1.00435955989205   |          |          |                  |         |         |         |      |
| 8                                                                    | 118                                          | regulation of endocytosis                             |                    |          |          |                  |         |         |         |      |
| GO:0031347                                                           | 8.362296822036e-06                           | 4.60239145303177                                      | 3.43014324268217   |          |          |                  |         |         |         |      |
| 14                                                                   | 403                                          | regulation of defense response                        |                    |          |          |                  |         |         |         |      |
| GO:0030097                                                           | 9.01559837148166e-06                         | 4.3030753968254                                       | 3.94083454432219   |          | 15       |                  |         |         |         |      |
| 463                                                                  | hemopoiesis                                  |                                                       |                    |          |          |                  |         |         |         |      |
| GO:0002263                                                           | 9.96894014034679e-06                         | 8.59765595463138                                      | 1.04691716836205   |          |          |                  |         |         |         |      |
| 8                                                                    | 123                                          | cell activation involved in immune response           |                    |          |          |                  |         |         |         |      |
| GO:0002366                                                           | 9.96894014034679e-06                         | 8.59765595463138                                      | 1.04691716836205   |          |          |                  |         |         |         |      |
| 8                                                                    | 123                                          | leukocyte activation involved in immune response      |                    |          |          |                  |         |         |         |      |
| GO:0031342                                                           | 1.18124064034452e-05                         | 119.375                                               | 0.0510691301640025 | 3        | 6        |                  |         |         |         |      |
| negative regulation of cell killing                                  |                                              |                                                       |                    |          |          |                  |         |         |         |      |
| GO:0002703                                                           | 1.31223329447269e-05                         | 10.1116632860041                                      | 0.783059995848038  |          |          |                  |         |         |         |      |
| 7                                                                    | 92                                           | regulation of leukocyte mediated immunity             |                    |          |          |                  |         |         |         |      |
| GO:0050870                                                           | 1.52829267162052e-05                         | 6.90350877192982                                      | 1.45547020967407   |          |          |                  |         |         |         |      |
| 9                                                                    | 171                                          | positive regulation of T cell activation              |                    |          |          |                  |         |         |         |      |
| GO:0032675                                                           | 1.53764606366223e-05                         | 12.8394062078273                                      | 0.536225866722026  |          |          |                  |         |         |         |      |
| 6                                                                    | 63                                           | regulation of interleukin-6 production                |                    |          |          |                  |         |         |         |      |
| GO:0042116                                                           | 1.65034237097815e-05                         | 18.3551617873652                                      | 0.323437824372016  |          |          |                  |         |         |         |      |
| 5                                                                    | 38                                           | macrophage activation                                 |                    |          |          |                  |         |         |         |      |
| GO:0050671                                                           | 1.73595233003197e-05                         | 9.65449438202247                                      | 0.81710608262404   |          |          |                  |         |         |         |      |
| 7                                                                    | 96                                           | positive regulation of lymphocyte proliferation       |                    |          |          |                  |         |         |         |      |
| GO:0032635                                                           | 1.84353107544292e-05                         | 12.4024337244676                                      | 0.553248910110027  |          |          |                  |         |         |         |      |
| 6                                                                    | 65                                           | interleukin-6 production                              |                    |          |          |                  |         |         |         |      |
| GO:0032946                                                           | 1.85789172614029e-05                         | 9.54655172413793                                      | 0.82561760431804   |          |          |                  |         |         |         |      |
| 7                                                                    | 97                                           | positive regulation of mononuclear cell proliferation |                    |          |          |                  |         |         |         |      |
| GO:0048534                                                           | 1.98443236597909e-05                         | 4.00694444444444                                      | 4.21320323853021   |          |          |                  |         |         |         |      |
| 15                                                                   | 495                                          | hemopoietic or lymphoid organ development             |                    |          |          |                  |         |         |         |      |
| Tissue: Lung=>Adipose_Subcutaneous Type: cluster                     |                                              |                                                       |                    |          |          |                  |         |         |         |      |
| SourceGene: MARCH10(ENSG00000173838.6)                               |                                              |                                                       |                    |          |          |                  |         |         |         |      |
| TargetGeneSet: TNFRSF4 C1QC RPS6KA1 C1orf38 LAPTM5 CSF3R MCOLN2 CD53 |                                              |                                                       |                    |          |          |                  |         |         |         |      |
| ADORA3                                                               | ARHGEF11                                     | MNDA                                                  | SLAMF8             | CD84     | ARHGAP30 | FCGR2A           | FCGR3A  |         |         |      |
| POU2F1                                                               | SELL                                         | RP11                                                  | PTPRC              | CR1      | WDR26    | GJC2             | NLRC4   | PLEK    | VAMP8   |      |
| MERTK                                                                | TFCP2L1                                      | SLC11A1                                               | CAB39              | CDCP1    | HCLS1    | CD86             | P2RY1   | PHC3    | ATP11B  | TFRC |
| HTT                                                                  | TLR1                                         | RBM47                                                 | WDFY3              | SNCA     | DAPP1    | C4orf21          | FAM105A | FYB     | GM2A    |      |
| HAVCR2                                                               | DOCK2                                        | DOK3                                                  | ZNF192             | AIF1     | GPSM3    | DEFA6            | TTYH3   | AOAH    | AKAP9   |      |
| PILRA                                                                | TFEC                                         | IRF5                                                  | TBXAS1             | MSR1     | DOK2     | DOCK5            | CTD     | VPS13B  | UBR5    | SLA  |
| HEATR7A                                                              | SYK                                          | FBP1                                                  | FKBP15             | CARD9    | C10orf31 |                  | MRC1    | WDFY4   | PIK3AP1 |      |
| PTPRE                                                                | MUC6                                         | RP13                                                  | COMMD9             | PTPRJ    | MS4A6A   | MS4A7            | MS4A6E  | CCDC88B | UNC93B5 |      |
| SLCO2B1                                                              | MYO7A                                        | IL10RA                                                | IFT46              | C11orf45 |          | PTPN6            | CD163   | M6PR    | CLEC7A  | BIN2 |
| NCKAP1L                                                              | ARHGAP9                                      | MAPKAPK5                                              |                    | GLT1D1   | LCP1     | PLCB2            | DMXL2   | AQP9    | DENND4A |      |
| FANCI                                                                | PRKCB                                        | APOBR                                                 | C16orf54           |          | CORO1A   | ATP6V0D1         |         | ZZEF1   | ARRB2   |      |
| SNORA48                                                              | CD68                                         | PIK3R5                                                | LGALS9             | CD300A   | HMHA1    | C19orf59         |         | CD209   | PRAM1   |      |
| MYO1F                                                                | MAN2B1                                       | KLF2                                                  | IFI30              | LRRC25   | GMIP     | ZNF714           | SPINT2  | RASGRP4 | PLD3    |      |
| CEACAM4                                                              | CD37                                         | SIGLEC7                                               | FPR2               | LILRB2   | LILRB1   | ZIM2             | SIGLEC1 | HCK     | MMP9    |      |
| CRYBB1                                                               | CYTH4                                        | SH3BP1                                                | TLR8               | OFD1     | CYBB     | WAS              | VSIG4   | BTK     | RP4     |      |
| ARHGAP4                                                              |                                              |                                                       |                    |          |          |                  |         |         |         |      |
| GOBPID                                                               | Pvalue                                       | OddsRatio                                             | ExpCount           | Count    | Size     | Term             |         |         |         |      |
| GO:0002764                                                           | 3.17525917561392e-12                         |                                                       | 10.5078260869565   |          |          | 2.1108573801121  | 18      |         |         |      |
| 248                                                                  | immune response-regulating signaling pathway |                                                       |                    |          |          |                  |         |         |         |      |
| GO:0050778                                                           | 3.5639430893975e-12                          |                                                       | 8.39435774309724   |          |          | 3.09819389661615 |         |         |         |      |
| 21                                                                   | 364                                          | positive regulation of immune response                |                    |          |          |                  |         |         |         |      |
| GO:0002253                                                           | 7.88480122848184e-12                         |                                                       | 9.16593406593407   |          |          | 2.54494498650612 |         |         |         |      |
| 19                                                                   | 299                                          | activation of immune response                         |                    |          |          |                  |         |         |         |      |
| GO:0050865                                                           | 8.50416276958404e-11                         |                                                       | 7.89636752136752   |          |          | 2.91945194104214 |         |         |         |      |
| 19                                                                   | 343                                          | regulation of cell activation                         |                    |          |          |                  |         |         |         |      |
| GO:0002252                                                           | 8.5223353516287e-11                          |                                                       | 7.40728951137991   |          |          | 3.28544737388416 |         |         |         |      |
| 20                                                                   | 386                                          | immune effector process                               |                    |          |          |                  |         |         |         |      |
| GO:0002757                                                           | 1.45183016632472e-10                         |                                                       | 9.6335936499808    |          |          | 2.0002075980901  | 16      |         |         |      |
|                                                                      |                                              |                                                       |                    |          |          |                  | 235     |         |         |      |

Stable4\_20PerPair

|                                                        |                                                                    |                  |                    |        |
|--------------------------------------------------------|--------------------------------------------------------------------|------------------|--------------------|--------|
| immune response-activating signal transduction         |                                                                    |                  |                    |        |
| GO:0042098                                             | 3.34398676056419e-10                                               | 14.5048444671086 | 1.00435955989205   |        |
| 12 118                                                 | T cell proliferation                                               |                  |                    |        |
| GO:0046649                                             | 6.46625481834432e-10                                               | 6.54223183431674 | 3.68548889350218   |        |
| 20 433                                                 | lymphocyte activation                                              |                  |                    |        |
| GO:0042110                                             | 1.64901707330439e-09                                               | 7.44851930526053 | 2.71517542038613   |        |
| 17 319                                                 | T cell activation                                                  |                  |                    |        |
| GO:0002694                                             | 1.8131862504206e-09                                                | 7.39846077457795 | 2.73219846377413   |        |
| 17 321                                                 | regulation of leukocyte activation                                 |                  |                    |        |
| GO:0046651                                             | 2.40778009111816e-09                                               | 10.5315608919383 | 1.46398173136807   |        |
| 13 172                                                 | lymphocyte proliferation                                           |                  |                    |        |
| GO:0032943                                             | 2.77379799910712e-09                                               | 10.3992659514399 | 1.48100477475607   |        |
| 13 174                                                 | mononuclear cell proliferation                                     |                  |                    |        |
| GO:0002768                                             | 3.37344018686564e-09                                               | 11.6265356265356 | 1.22565912393606   |        |
| 12 144                                                 | immune response-regulating cell surface receptor signaling pathway |                  |                    |        |
| GO:0070661                                             | 4.79816032963925e-09                                               | 9.9013986013986  | 1.54909694830808   | 13     |
| 182                                                    | leukocyte proliferation                                            |                  |                    |        |
| GO:0006897                                             | 5.3768325469158e-09                                                | 6.84537505752416 | 2.93647498443014   |        |
| 17 345                                                 | endocytosis                                                        |                  |                    |        |
| GO:0050670                                             | 3.89120289605634e-08                                               | 10.4823442534909 | 1.22565912393606   |        |
| 11 144                                                 | regulation of lymphocyte proliferation                             |                  |                    |        |
| GO:0032944                                             | 4.18065378295491e-08                                               | 10.4033848614072 | 1.23417064563006   |        |
| 11 145                                                 | regulation of mononuclear cell proliferation                       |                  |                    |        |
| GO:0070663                                             | 5.93542564562744e-08                                               | 10.0256294964029 | 1.27672825410006   |        |
| 11 150                                                 | regulation of leukocyte proliferation                              |                  |                    |        |
| GO:0006954                                             | 6.94440190076239e-08                                               | 5.36061776061776 | 3.93232302262819   |        |
| 18 462                                                 | inflammatory response                                              |                  |                    |        |
| GO:0051249                                             | 1.26540204035743e-07                                               | 6.71279969987381 | 2.40876063940212   |        |
| 14 283                                                 | regulation of lymphocyte activation                                |                  |                    |        |
| GO:0050867                                             | 1.28847622001187e-07                                               | 7.34132959551462 | 2.0427652065601    | 13     |
| 240                                                    | positive regulation of cell activation                             |                  |                    |        |
| GO:0050853                                             | 1.36117103737063e-07                                               | 31.8952062430323 | 0.246834129126012  |        |
| 6 29                                                   | B cell receptor signaling pathway                                  |                  |                    |        |
| GO:0002697                                             | 1.40749861590465e-07                                               | 8.08751608751609 | 1.71081586049408   |        |
| 12 201                                                 | regulation of immune effector process                              |                  |                    |        |
| GO:0042129                                             | 1.88840355589208e-07                                               | 12.2162471395881 | 0.859663691094042  |        |
| 9 101                                                  | regulation of T cell proliferation                                 |                  |                    |        |
| GO:0002429                                             | 1.92794548484794e-07                                               | 10.2201597237211 | 1.13203238530206   |        |
| 10 133                                                 | immune response-activating cell surface receptor signaling pathway |                  |                    |        |
| GO:0001816                                             | 2.35237047731635e-07                                               | 5.50351392005524 | 3.36205106913016   |        |
| 16 395                                                 | cytokine production                                                |                  |                    |        |
| GO:0045088                                             | 2.92116919480973e-07                                               | 7.5223006257489  | 1.82997716421009   | 12     |
| 215                                                    | regulation of innate immune response                               |                  |                    |        |
| GO:0001817                                             | 3.89407282254098e-07                                               | 5.64599483204134 | 3.05563628814615   |        |
| 15 359                                                 | regulation of cytokine production                                  |                  |                    |        |
| GO:0006909                                             | 6.674296027887e-07                                                 | 12.7090301003344 | 0.731990865684036  |        |
| 8 86                                                   | phagocytosis                                                       |                  |                    |        |
| GO:0050764                                             | 7.43106896175798e-07                                               | 22.9102564102564 | 0.323437824372016  |        |
| 6 38                                                   | regulation of phagocytosis                                         |                  |                    |        |
| GO:0050851                                             | 1.01746170274446e-06                                               | 9.84349030470914 | 1.04691716836205   |        |
| 9 123                                                  | antigen receptor-mediated signaling pathway                        |                  |                    |        |
| GO:0002443                                             | 1.82900287747965e-06                                               | 6.93785714285714 | 1.79593107743409   |        |
| 11 211                                                 | leukocyte mediated immunity                                        |                  |                    |        |
| GO:0051251                                             | 2.19631347999062e-06                                               | 6.79989495798319 | 1.82997716421009   |        |
| 11 215                                                 | positive regulation of lymphocyte activation                       |                  |                    |        |
| GO:0050863                                             | 2.86867805888058e-06                                               | 6.60280612244898 | 1.88104629437409   |        |
| 11 221                                                 | regulation of T cell activation                                    |                  |                    |        |
| GO:0002274                                             | 3.5334009097762e-06                                                | 9.99841897233201 | 0.910732821258044  |        |
| 8 107                                                  | myeloid leukocyte activation                                       |                  |                    |        |
| GO:0002696                                             | 4.77291829778004e-06                                               | 6.2405888030888  | 1.9831845547021    | 11 233 |
| positive regulation of leukocyte activation            |                                                                    |                  |                    |        |
| GO:0001911                                             | 5.94319790784005e-06                                               | 179.075          | 0.0425576084700021 | 3 5    |
| negative regulation of leukocyte mediated cytotoxicity |                                                                    |                  |                    |        |

Stable4\_20PerPair

|                                                     |                                                                     |                            |                     |         |                   |          |        |           |
|-----------------------------------------------------|---------------------------------------------------------------------|----------------------------|---------------------|---------|-------------------|----------|--------|-----------|
| GO:0030100                                          | 7.33596052824878e-06                                                | 8.99162055335968           | 1.00435955989205    |         |                   |          |        |           |
| 8 118                                               | regulation of endocytosis                                           |                            |                     |         |                   |          |        |           |
| GO:0031347                                          | 8.362296822036e-06                                                  | 4.60239145303177           | 3.43014324268217    |         |                   |          |        |           |
| 14 403                                              | regulation of defense response                                      |                            |                     |         |                   |          |        |           |
| GO:0030097                                          | 9.01559837148166e-06                                                | 4.3030753968254            | 3.94083454432219 15 |         |                   |          |        |           |
| 463                                                 | hemopoiesis                                                         |                            |                     |         |                   |          |        |           |
| GO:0002263                                          | 9.96894014034679e-06                                                | 8.59765595463138           | 1.04691716836205    |         |                   |          |        |           |
| 8 123                                               | cell activation involved in immune response                         |                            |                     |         |                   |          |        |           |
| GO:0002366                                          | 9.96894014034679e-06                                                | 8.59765595463138           | 1.04691716836205    |         |                   |          |        |           |
| 8 123                                               | leukocyte activation involved in immune response                    |                            |                     |         |                   |          |        |           |
| GO:0031342                                          | 1.18124064034452e-05                                                | 119.375 0.0510691301640025 | 3 6                 |         |                   |          |        |           |
| negative regulation of cell killing                 |                                                                     |                            |                     |         |                   |          |        |           |
| GO:0002703                                          | 1.31223329447269e-05                                                | 10.1116632860041           | 0.783059995848038   |         |                   |          |        |           |
| 7 92                                                | regulation of leukocyte mediated immunity                           |                            |                     |         |                   |          |        |           |
| GO:0050870                                          | 1.52829267162052e-05                                                | 6.90350877192982           | 1.45547020967407    |         |                   |          |        |           |
| 9 171                                               | positive regulation of T cell activation                            |                            |                     |         |                   |          |        |           |
| GO:0032675                                          | 1.53764606366223e-05                                                | 12.8394062078273           | 0.536225866722026   |         |                   |          |        |           |
| 6 63                                                | regulation of interleukin-6 production                              |                            |                     |         |                   |          |        |           |
| GO:0042116                                          | 1.65034237097815e-05                                                | 18.3551617873652           | 0.323437824372016   |         |                   |          |        |           |
| 5 38                                                | macrophage activation                                               |                            |                     |         |                   |          |        |           |
| GO:0050671                                          | 1.73595233003197e-05                                                | 9.65449438202247           | 0.81710608262404    |         |                   |          |        |           |
| 7 96                                                | positive regulation of lymphocyte proliferation                     |                            |                     |         |                   |          |        |           |
| GO:0032635                                          | 1.84353107544292e-05                                                | 12.4024337244676           | 0.553248910110027   |         |                   |          |        |           |
| 6 65                                                | interleukin-6 production                                            |                            |                     |         |                   |          |        |           |
| GO:0032946                                          | 1.85789172614029e-05                                                | 9.54655172413793           | 0.82561760431804    |         |                   |          |        |           |
| 7 97                                                | positive regulation of mononuclear cell proliferation               |                            |                     |         |                   |          |        |           |
| GO:0048534                                          | 1.98443236597909e-05                                                | 4.00694444444444           | 4.21320323853021    |         |                   |          |        |           |
| 15 495                                              | hemopoietic or lymphoid organ development                           |                            |                     |         |                   |          |        |           |
| Tissue: Lung=>Adipose_Subcutaneous Type: asymmetric |                                                                     |                            |                     |         |                   |          |        |           |
| SourceGene: RP11-131H24.4(ENSG00000258987.1)        |                                                                     |                            |                     |         |                   |          |        |           |
| TargetGeneSet:                                      | GNL2                                                                | WDR65                      | RPS8                | RPL5    | RP11              | FAM46C   | S100A6 | EEF1B2    |
| C2orf57 ZNF502                                      | GRM2                                                                | ACTL6A                     | SLC30A9             | EXOC7   | BRD9              | CTD      | AGGF1  | SNX24     |
| ZNF300 TDP2                                         | RARS2                                                               | DNAJC2                     | NAA38               | ARF5    | RPS20             | SNHG6    | DCAF13 | RPL8 RPS6 |
| NFX1 TXN                                            | RPL12                                                               | CDNF                       | SLC39A13            |         | SLC35E3           | RPL18AP3 |        | RPLP0     |
| PRHOXNB CCDC122                                     | GMFB                                                                | WDHD1                      | LGALS3              | TRMT5   | RPS3AP6           | RPLP1    | RPS17L | ABCC6     |
| LCMT1 DDX19B                                        | RAC3                                                                | RPS15                      | RPL36               | DPY19L3 | RPS19             | C19orf48 |        | RPS9 DTD1 |
| DMC1 EEF1B2P3                                       |                                                                     | IGBP1-AS1                  |                     |         |                   |          |        |           |
| GOBPID Pvalue                                       | OddsRatio                                                           | ExpCount                   | Count               | Size    | Term              |          |        |           |
| GO:0006414                                          | 4.47492340187973e-20                                                | 73.4153846153846           |                     |         | 0.31970105875026  |          |        |           |
| 14 105                                              | translational elongation                                            |                            |                     |         |                   |          |        |           |
| GO:0006415                                          | 4.44824292612228e-19                                                | 77.0376344086021           |                     |         | 0.277074250916892 |          |        |           |
| 13 91                                               | translational termination                                           |                            |                     |         |                   |          |        |           |
| GO:0006614                                          | 3.1495736053317e-18                                                 | 65.2507012622721           |                     |         | 0.31970105875026  |          |        |           |
| 13 105                                              | SRP-dependent cotranslational protein targeting to membrane         |                            |                     |         |                   |          |        |           |
| GO:0006613                                          | 3.58264347410442e-18                                                | 64.5445716267777           |                     |         | 0.322745830738357 |          |        |           |
| 13 106                                              | cotranslational protein targeting to membrane                       |                            |                     |         |                   |          |        |           |
| GO:0045047                                          | 3.58264347410442e-18                                                | 64.5445716267777           |                     |         | 0.322745830738357 |          |        |           |
| 13 106                                              | protein targeting to ER                                             |                            |                     |         |                   |          |        |           |
| GO:0072599                                          | 3.58264347410442e-18                                                | 64.5445716267777           |                     |         | 0.322745830738357 |          |        |           |
| 13 106                                              | establishment of protein localization to endoplasmic reticulum      |                            |                     |         |                   |          |        |           |
| GO:0070972                                          | 1.52891891748631e-17                                                | 57.1201228878648           |                     |         | 0.35928309459553  |          |        |           |
| 13 118                                              | protein localization to endoplasmic reticulum                       |                            |                     |         |                   |          |        |           |
| GO:0000184                                          | 1.71298613237649e-17                                                | 56.5772976262934           |                     |         | 0.362327866583627 |          |        |           |
| 13 119                                              | nuclear-transcribed mRNA catabolic process, nonsense-mediated decay |                            |                     |         |                   |          |        |           |
| GO:0019080                                          | 4.11922810399803e-16                                                | 43.3606825619448           |                     |         | 0.459760570202754 |          |        |           |
| 13 151                                              | viral genome expression                                             |                            |                     |         |                   |          |        |           |
| GO:0019083                                          | 4.11922810399803e-16                                                | 43.3606825619448           |                     |         | 0.459760570202754 |          |        |           |
| 13 151                                              | viral transcription                                                 |                            |                     |         |                   |          |        |           |
| GO:0006413                                          | 4.49543126155085e-16                                                | 43.0457182640984           |                     |         | 0.462805342190852 |          |        |           |
| 13 152                                              | translational initiation                                            |                            |                     |         |                   |          |        |           |
| GO:0006612                                          | 4.90299489292293e-16                                                | 42.7352534562212           |                     |         | 0.46585011417895  |          |        |           |
| 13 153                                              | protein targeting to membrane                                       |                            |                     |         |                   |          |        |           |
| GO:0043624                                          | 4.90299489292293e-16                                                | 42.7352534562212           |                     |         | 0.46585011417895  |          |        |           |

Stable4\_20PerPair

|                |                                  |                                                             |                  |                   |         |                   |          |                    |       |
|----------------|----------------------------------|-------------------------------------------------------------|------------------|-------------------|---------|-------------------|----------|--------------------|-------|
| 13             | 153                              | cellular protein complex disassembly                        |                  |                   |         |                   |          |                    |       |
| GO:0043241     |                                  | 7.49987316382628e-16                                        | 41.2471635150167 |                   |         |                   |          | 0.481073974119438  |       |
| 13             | 158                              | protein complex disassembly                                 |                  |                   |         |                   |          |                    |       |
| GO:0000956     |                                  | 1.82027593177232e-15                                        | 38.3091397849462 |                   |         |                   |          | 0.514566465988513  |       |
| 13             | 169                              | nuclear-transcribed mRNA catabolic process                  |                  |                   |         |                   |          |                    |       |
| GO:0034623     |                                  | 2.66953271065401e-15                                        | 37.1063915047085 |                   |         |                   |          | 0.529790325929001  |       |
| 13             | 174                              | cellular macromolecular complex disassembly                 |                  |                   |         |                   |          |                    |       |
| GO:0006402     |                                  | 3.59626010982814e-15                                        | 36.1966764418377 |                   |         |                   |          | 0.541969413881392  |       |
| 13             | 178                              | mRNA catabolic process                                      |                  |                   |         |                   |          |                    |       |
| GO:0032984     |                                  | 3.87009377822261e-15                                        | 35.9760979401477 |                   |         |                   |          | 0.54501418586949   |       |
| 13             | 179                              | macromolecular complex disassembly                          |                  |                   |         |                   |          |                    |       |
| GO:0072594     |                                  | 2.12913434551424e-14                                        | 31.212295220402  | 0.621133485571933 |         |                   |          |                    | 13    |
| 204            |                                  | establishment of protein localization to organelle          |                  |                   |         |                   |          |                    |       |
| GO:0006401     |                                  | 2.26871484396848e-14                                        | 31.0475470430108 |                   |         |                   |          | 0.62417825756003   |       |
| 13             | 205                              | RNA catabolic process                                       |                  |                   |         |                   |          |                    |       |
| GO:0019058     |                                  | 1.06290140406222e-13                                        | 27.2946137910624 |                   |         |                   |          | 0.703342329250571  |       |
| 13             | 231                              | viral infectious cycle                                      |                  |                   |         |                   |          |                    |       |
| GO:0022415     |                                  | 4.84922544983523e-13                                        | 24.0407470288625 |                   |         |                   |          | 0.791640716905404  |       |
| 13             | 260                              | viral reproductive process                                  |                  |                   |         |                   |          |                    |       |
| GO:0071845     |                                  | 1.49424458973798e-12                                        | 21.8745387453875 |                   |         |                   |          | 0.864715244619749  |       |
| 13             | 284                              | cellular component disassembly at cellular level            |                  |                   |         |                   |          |                    |       |
| GO:0022411     |                                  | 1.78473401619954e-12                                        | 21.5502639296188 |                   |         |                   |          | 0.87689433257214   |       |
| 13             | 288                              | cellular component disassembly                              |                  |                   |         |                   |          |                    |       |
| GO:0033365     |                                  | 6.25701820180238e-11                                        | 14.1809731299927 |                   |         |                   |          | 1.44017715037022   |       |
| 14             | 473                              | protein localization to organelle                           |                  |                   |         |                   |          |                    |       |
| GO:0006605     |                                  | 6.43461749299724e-11                                        | 14.1491304347826 |                   |         |                   |          | 1.44322192235831   |       |
| 14             | 474                              | protein targeting                                           |                  |                   |         |                   |          |                    |       |
| GO:0016032     |                                  | 4.82255836927957e-10                                        | 13.3743555751952 |                   |         |                   |          | 1.37319216663207   |       |
| 13             | 451                              | viral reproduction                                          |                  |                   |         |                   |          |                    |       |
| GO:0042254     |                                  | 5.38470278183566e-10                                        | 26.204693877551  | 0.453671026226559 |         |                   |          |                    | 9     |
| 149            |                                  | ribosome biogenesis                                         |                  |                   |         |                   |          |                    |       |
| GO:0022613     |                                  | 1.07083822534352e-09                                        | 19.4145006839945 |                   |         |                   |          | 0.685073697321985  |       |
| 10             | 225                              | ribonucleoprotein complex biogenesis                        |                  |                   |         |                   |          |                    |       |
| GO:0042274     |                                  | 1.72182548076821e-09                                        | 141.952662721893 |                   |         |                   |          | 0.0548058957857588 |       |
| 5              | 18                               | ribosomal small subunit biogenesis                          |                  |                   |         |                   |          |                    |       |
| GO:0071843     |                                  | 1.922874683998e-09                                          | 18.2096069868996 |                   |         |                   |          | 0.727700505155353  |       |
| 10             | 239                              | cellular component biogenesis at cellular level             |                  |                   |         |                   |          |                    |       |
| GO:0006364     |                                  | 2.51065623580698e-08                                        | 27.9102814154361 |                   |         |                   |          | 0.316656286762162  |       |
| 7              | 104                              | rRNA processing                                             |                  |                   |         |                   |          |                    |       |
| GO:0016072     |                                  | 3.71045693642895e-08                                        | 26.2734190501181 |                   |         |                   |          | 0.334924918690748  |       |
| 7              | 110                              | rRNA metabolic process                                      |                  |                   |         |                   |          |                    |       |
| GO:0034660     |                                  | 1.98540881113008e-06                                        | 11.3357400722022 |                   |         |                   |          | 0.867760016607847  |       |
| 8              | 285                              | ncRNA metabolic process                                     |                  |                   |         |                   |          |                    |       |
| GO:0034470     |                                  | 2.17447811327912e-06                                        | 13.933342669094  | 0.608954397619542 |         |                   |          |                    | 7     |
| 200            |                                  | ncRNA processing                                            |                  |                   |         |                   |          |                    |       |
| Tissue:        | Lung=>Adipose_subcutaneous       | Type:                                                       | cluster          |                   |         |                   |          |                    |       |
| SourceGene:    | RP11-131H24.4(ENSG00000258987.1) |                                                             |                  |                   |         |                   |          |                    |       |
| TargetGeneSet: | GNL2                             | WDR65                                                       | RPS8             | RPL5              | RP11    | FAM46C            | S100A6   | EEF1B2             |       |
| C2orf57        | ZNF502                           | GRM2                                                        | ACTL6A           | SLC30A9           | EXOC7   | BRD9              | CTD      | AGGF1              | SNX24 |
| ZNF300         | TDP2                             | RARS2                                                       | DNAJC2           | NAA38             | ARF5    | RPS20             | SNHG6    | DCAF13             | RPL8  |
| NFX1           | TXN                              | RPL12                                                       | CDNF             | SLC39A13          |         | SLC35E3           | RPL18AP3 |                    | RPLP0 |
| PRHOXNB        | CCDC122                          | GMFB                                                        | WDHD1            | LGALS3            | TRMT5   | RPS3AP6           | RPLP1    | RPS17L             | ABCC6 |
| LCMT1          | DDX19B                           | RAC3                                                        | RPS15            | RPL36             | DPY19L3 | RPS19             | C19orf48 |                    | RPS9  |
| DMC1           | EEF1B2P3                         |                                                             | IGBP1-AS1        |                   |         |                   |          |                    | DTD1  |
| GOBPID         | Pvalue                           | OddsRatio                                                   | ExpCount         | Count             | Size    | Term              |          |                    |       |
| GO:0006414     |                                  | 4.47492340187973e-20                                        | 73.4153846153846 |                   |         | 0.31970105875026  |          |                    |       |
| 14             | 105                              | translational elongation                                    |                  |                   |         |                   |          |                    |       |
| GO:0006415     |                                  | 4.44824292612228e-19                                        | 77.0376344086021 |                   |         | 0.277074250916892 |          |                    |       |
| 13             | 91                               | translational termination                                   |                  |                   |         |                   |          |                    |       |
| GO:0006614     |                                  | 3.1495736053317e-18                                         | 65.2507012622721 |                   |         | 0.31970105875026  |          |                    |       |
| 13             | 105                              | SRP-dependent cotranslational protein targeting to membrane |                  |                   |         |                   |          |                    |       |
| GO:0006613     |                                  | 3.58264347410442e-18                                        | 64.5445716267777 |                   |         | 0.322745830738357 |          |                    |       |
| 13             | 106                              | cotranslational protein targeting to membrane               |                  |                   |         |                   |          |                    |       |

Stable4\_20PerPair

|            |                      |                                                                     |                    |    |
|------------|----------------------|---------------------------------------------------------------------|--------------------|----|
| GO:0045047 | 3.58264347410442e-18 | 64.5445716267777                                                    | 0.322745830738357  |    |
| 13         | 106                  | protein targeting to ER                                             |                    |    |
| GO:0072599 | 3.58264347410442e-18 | 64.5445716267777                                                    | 0.322745830738357  |    |
| 13         | 106                  | establishment of protein localization to endoplasmic reticulum      |                    |    |
| GO:0070972 | 1.52891891748631e-17 | 57.1201228878648                                                    | 0.35928309459553   |    |
| 13         | 118                  | protein localization to endoplasmic reticulum                       |                    |    |
| GO:0000184 | 1.71298613237649e-17 | 56.5772976262934                                                    | 0.362327866583627  |    |
| 13         | 119                  | nuclear-transcribed mRNA catabolic process, nonsense-mediated decay |                    |    |
| GO:0019080 | 4.11922810399803e-16 | 43.3606825619448                                                    | 0.459760570202754  |    |
| 13         | 151                  | viral genome expression                                             |                    |    |
| GO:0019083 | 4.11922810399803e-16 | 43.3606825619448                                                    | 0.459760570202754  |    |
| 13         | 151                  | viral transcription                                                 |                    |    |
| GO:0006413 | 4.49543126155085e-16 | 43.0457182640984                                                    | 0.462805342190852  |    |
| 13         | 152                  | translational initiation                                            |                    |    |
| GO:0006612 | 4.90299489292293e-16 | 42.7352534562212                                                    | 0.46585011417895   |    |
| 13         | 153                  | protein targeting to membrane                                       |                    |    |
| GO:0043624 | 4.90299489292293e-16 | 42.7352534562212                                                    | 0.46585011417895   |    |
| 13         | 153                  | cellular protein complex disassembly                                |                    |    |
| GO:0043241 | 7.49987316382628e-16 | 41.2471635150167                                                    | 0.481073974119438  |    |
| 13         | 158                  | protein complex disassembly                                         |                    |    |
| GO:0000956 | 1.82027593177232e-15 | 38.3091397849462                                                    | 0.514566465988513  |    |
| 13         | 169                  | nuclear-transcribed mRNA catabolic process                          |                    |    |
| GO:0034623 | 2.66953271065401e-15 | 37.1063915047085                                                    | 0.529790325929001  |    |
| 13         | 174                  | cellular macromolecular complex disassembly                         |                    |    |
| GO:0006402 | 3.59626010982814e-15 | 36.1966764418377                                                    | 0.541969413881392  |    |
| 13         | 178                  | mRNA catabolic process                                              |                    |    |
| GO:0032984 | 3.87009377822261e-15 | 35.9760979401477                                                    | 0.54501418586949   |    |
| 13         | 179                  | macromolecular complex disassembly                                  |                    |    |
| GO:0072594 | 2.12913434551424e-14 | 31.212295220402                                                     | 0.621133485571933  | 13 |
| 204        |                      | establishment of protein localization to organelle                  |                    |    |
| GO:0006401 | 2.26871484396848e-14 | 31.0475470430108                                                    | 0.62417825756003   |    |
| 13         | 205                  | RNA catabolic process                                               |                    |    |
| GO:0019058 | 1.06290140406222e-13 | 27.2946137910624                                                    | 0.703342329250571  |    |
| 13         | 231                  | viral infectious cycle                                              |                    |    |
| GO:0022415 | 4.84922544983523e-13 | 24.0407470288625                                                    | 0.791640716905404  |    |
| 13         | 260                  | viral reproductive process                                          |                    |    |
| GO:0071845 | 1.49424458973798e-12 | 21.8745387453875                                                    | 0.864715244619749  |    |
| 13         | 284                  | cellular component disassembly at cellular level                    |                    |    |
| GO:0022411 | 1.78473401619954e-12 | 21.5502639296188                                                    | 0.87689433257214   |    |
| 13         | 288                  | cellular component disassembly                                      |                    |    |
| GO:0033365 | 6.25701820180238e-11 | 14.1809731299927                                                    | 1.44017715037022   |    |
| 14         | 473                  | protein localization to organelle                                   |                    |    |
| GO:0006605 | 6.43461749299724e-11 | 14.1491304347826                                                    | 1.44322192235831   |    |
| 14         | 474                  | protein targeting                                                   |                    |    |
| GO:0016032 | 4.82255836927957e-10 | 13.3743555751952                                                    | 1.37319216663207   |    |
| 13         | 451                  | viral reproduction                                                  |                    |    |
| GO:0042254 | 5.38470278183566e-10 | 26.204693877551                                                     | 0.453671026226559  | 9  |
| 149        |                      | ribosome biogenesis                                                 |                    |    |
| GO:0022613 | 1.07083822534352e-09 | 19.4145006839945                                                    | 0.685073697321985  |    |
| 10         | 225                  | ribonucleoprotein complex biogenesis                                |                    |    |
| GO:0042274 | 1.72182548076821e-09 | 141.952662721893                                                    | 0.0548058957857588 |    |
| 5          | 18                   | ribosomal small subunit biogenesis                                  |                    |    |
| GO:0071843 | 1.922874683998e-09   | 18.2096069868996                                                    | 0.727700505155353  |    |
| 10         | 239                  | cellular component biogenesis at cellular level                     |                    |    |
| GO:0006364 | 2.51065623580698e-08 | 27.9102814154361                                                    | 0.316656286762162  |    |
| 7          | 104                  | rRNA processing                                                     |                    |    |
| GO:0016072 | 3.71045693642895e-08 | 26.2734190501181                                                    | 0.334924918690748  |    |
| 7          | 110                  | rRNA metabolic process                                              |                    |    |
| GO:0034660 | 1.98540881113008e-06 | 11.3357400722022                                                    | 0.867760016607847  |    |
| 8          | 285                  | ncRNA metabolic process                                             |                    |    |
| GO:0034470 | 2.17447811327912e-06 | 13.933342669094                                                     | 0.608954397619542  | 7  |
| 200        |                      | ncRNA processing                                                    |                    |    |

Tissue: Lung=>Adipose\_Subcutaneous

Type: asymmetric  
Page 487

Stable4\_20PerPair

| SourceGene:    | RP11-156P1.1(ENSG00000263142.1) |                      |                  |                   |                   |                                                                     |        |                    |             |
|----------------|---------------------------------|----------------------|------------------|-------------------|-------------------|---------------------------------------------------------------------|--------|--------------------|-------------|
| TargetGeneSet: | SDHB                            | DNAJC8               | PRDX3P2          | ZMYM4             | MEAF6             | NFYC                                                                | RPL5   | ATP5F1             |             |
| LCE1C          | ELL2P1                          | COPA                 | MGST3            | CEP350            | CICP13            | RPS7                                                                | BIRC6  | SOS1-IT1           |             |
| CALM2          | COX5B                           | UGGT1                | H3F3AP4          | FTH1P20           | COL4A4            | EFHD1                                                               | SNED1  | HDLBP              | RP11        |
| RPL24          | NDUFB4                          | CNBP                 | RYK              | NME9              | DNAJC19           | PSAPL1                                                              | BOD1L  | CD38               | TXK         |
| ANKRD17        | PPM1K                           | NDUFC1               | CTD              | TBCA              | ELL2              | ISOC1                                                               | SKP1   | MTND5P11           |             |
| TRIM41         | RPL15P3                         | AGPAT1               | RP3              | COX7A2            | RWDD1             | CYCS                                                                | SEPT7  | RP4                | SYPL1       |
| NDUFA5         | FSCN3                           | CHCHD3               | DCTN6            | VDAC3             | HOOK3             | ARFGEF1                                                             | OXR1   | EIF3E              | ATP6V1G1    |
| RPL7A          | SEC16A                          | ATP5C1               | C10orf31         |                   | VDAC2             | C10orf99                                                            |        | NDUFB8             | FAM196A     |
| RPL27A         | CKAP5                           | NDUFS3               | ZBTB3            | C11orf73          |                   | SDHD                                                                | UBE4A  | ATP5L              | DDX6        |
| NCKAP5L        | PFDN5                           | NACA                 | LRP1             | GNS               | CPM               | CCDC59                                                              | RPL6   | GOLGA3             | MRP63 ESD   |
| CGRRF1         | VPS39                           | SEC11A               | MPG              | NDUFB10           | ECI1              | RPS15A                                                              | SMG1   | MT1X               | VPS53       |
| TLCD2          | WDR81                           | RPL26                | CCDC144B         |                   | RPS7P1            | RFFL                                                                | RPL19  | SUMO2              | TNRC6C EPG5 |
| LINGO3         | PTPRS                           | CTB                  | ZNF121           | ZNF490            | BRD4              | ZNF429                                                              | KRTDAP | EIF3K              | ZNF587      |
| SAMHD1         | LBP                             | CHD6                 | FAM65C           | ATP5J             | ATP5O             | SNRPD3                                                              | TNRC6B | DYNLT3             | USP9X       |
| GNL3L          | COX7B                           |                      |                  |                   |                   |                                                                     |        |                    |             |
| GOBPID         | Pvalue                          | OddsRatio            | ExpCount         | Count             | Size              | Term                                                                |        |                    |             |
| GO:0022904     | 16                              | 1.9149620777185e-17  | 30.0210526315789 |                   |                   | respiratory electron transport chain                                |        | 0.737388416026573  |             |
| GO:0022900     | 16                              | 4.63841446181159e-15 | 20.2990187332739 |                   |                   | electron transport chain                                            |        | 1.02927133070376   |             |
| GO:0045333     | 16                              | 1.17844961179359e-14 | 18.9994987468672 |                   |                   | cellular respiration                                                |        | 1.09072036537264   |             |
| GO:0015980     | 18                              | 1.89261166250888e-11 | 9.41020203147673 |                   |                   | energy derivation by oxidation of organic compounds                 |        | 2.35810670541831   |             |
| GO:0000184     | 11                              | 1.74980904851174e-09 | 14.4955555555556 |                   |                   | nuclear-transcribed mRNA catabolic process, nonsense-mediated decay |        | 0.914054390699606  |             |
| GO:0006091     | 18                              | 4.08077617690187e-09 | 6.57592446892211 |                   |                   | generation of precursor metabolites and energy                      |        | 3.28752335478514   |             |
| GO:0000956     | 12                              | 6.40356036300852e-09 | 10.9500096506466 |                   |                   | nuclear-transcribed mRNA catabolic process                          |        | 1.29811085738011   |             |
| GO:0006614     | 10                              | 7.43270873231137e-09 | 14.8462741010943 |                   |                   | SRP-dependent cotranslational protein targeting to membrane         |        | 0.806518580029064  |             |
| GO:0006613     | 10                              | 8.15473212166693e-09 | 14.6905940594059 |                   |                   | cotranslational protein targeting to membrane                       |        | 0.814199709362674  |             |
| GO:0045047     | 10                              | 8.15473212166693e-09 | 14.6905940594059 |                   |                   | protein targeting to ER                                             |        | 0.814199709362674  |             |
| GO:0072599     | 10                              | 8.15473212166693e-09 | 14.6905940594059 |                   |                   | establishment of protein localization to endoplasmic reticulum      |        | 0.814199709362674  |             |
| GO:0006402     | 178                             | 1.15049751333791e-08 | 10.3497626871121 |                   |                   | mRNA catabolic process                                              |        | 1.3672410213826    | 12          |
| GO:0006119     | 8                               | 1.3082411512096e-08  | 22.1980582524272 |                   |                   | oxidative phosphorylation                                           |        | 0.445505501349388  |             |
| GO:0070972     | 118                             | 2.31095331448848e-08 | 13.047304730473  |                   | 0.906373261365995 | protein localization to endoplasmic reticulum                       |        |                    | 10          |
| GO:0006413     | 11                              | 2.32705898368316e-08 | 11.0772340425532 |                   |                   | translational initiation                                            |        | 1.16753165870874   |             |
| GO:0042776     | 5                               | 2.99252715655819e-08 | 84.5047169811321 |                   |                   | mitochondrial ATP synthesis coupled proton transport                |        | 0.0998546813369317 |             |
| GO:0006415     | 9                               | 3.10777257931095e-08 | 15.3421807747489 |                   |                   | translational termination                                           |        | 0.698982769358522  |             |
| GO:0006401     | 12                              | 5.54930093184093e-08 | 8.88491128905637 |                   |                   | RNA catabolic process                                               |        | 1.57463151339008   |             |
| GO:0042773     |                                 | 6.3632460322739e-08  | 24.0625          | 0.361013078679676 |                   | ATP synthesis coupled electron transport                            | 7      |                    | 47          |
| GO:0042775     |                                 | 6.3632460322739e-08  | 24.0625          | 0.361013078679676 |                   | mitochondrial ATP synthesis coupled electron transport              | 7      |                    | 47          |
| GO:0006414     | 9                               | 1.08983174846975e-07 | 13.0919117647059 |                   |                   | translational elongation                                            |        | 0.806518580029064  |             |
| GO:0015985     | 5                               | 1.93212855523158e-07 | 51.9847605224964 |                   |                   | energy coupled proton transport, down electrochemical gradient      |        | 0.138260328004982  |             |
| GO:0015986     | 5                               | 1.93212855523158e-07 | 51.9847605224964 |                   |                   | ATP synthesis coupled proton transport                              |        | 0.138260328004982  |             |



Stable4\_20PerPair

|                                                                         |                                                      |                                                                     |                   |
|-------------------------------------------------------------------------|------------------------------------------------------|---------------------------------------------------------------------|-------------------|
| GO:0006612                                                              | 2.7204775674273e-07                                  | 9.82967527521983                                                    | 1.17521278804235  |
| 10                                                                      | 153                                                  | protein targeting to membrane                                       |                   |
| GO:0006120                                                              | 2.89411785563967e-07                                 | 27.2571428571429                                                    | 0.276520656009965 |
| 6                                                                       | 36                                                   | mitochondrial electron transport, NADH to ubiquinone                |                   |
| GO:0072594                                                              | 4.6775763684049e-07                                  | 8.06305699481865                                                    | 1.56695038405647  |
| 11                                                                      | 204                                                  | establishment of protein localization to organelle                  |                   |
| GO:0019080                                                              | 2.38618692897094e-06                                 | 8.82228666114333                                                    | 1.15985052937513  |
| 9                                                                       | 151                                                  | viral genome expression                                             |                   |
| GO:0019083                                                              | 2.38618692897094e-06                                 | 8.82228666114333                                                    | 1.15985052937513  |
| 9                                                                       | 151                                                  | viral transcription                                                 |                   |
| GO:0043624                                                              | 2.66077457554848e-06                                 | 8.69852941176471                                                    | 1.17521278804235  |
| 9                                                                       | 153                                                  | cellular protein complex disassembly                                |                   |
| GO:0043241                                                              | 3.46915865338344e-06                                 | 8.40367153572839                                                    | 1.2136184347104 9 |
| 158                                                                     | protein                                              | complex disassembly                                                 |                   |
| GO:0009206                                                              | 6.40552059862489e-06                                 | 15.1174603174603                                                    | 0.460867760016608 |
| 6                                                                       | 60                                                   | purine ribonucleoside triphosphate biosynthetic process             |                   |
| GO:0009145                                                              | 7.06022074628325e-06                                 | 14.8415584415584                                                    | 0.468548889350218 |
| 6                                                                       | 61                                                   | purine nucleoside triphosphate biosynthetic process                 |                   |
| GO:0034623                                                              | 7.62820847741854e-06                                 | 7.58021390374332                                                    | 1.33651650404816  |
| 9                                                                       | 174                                                  | cellular macromolecular complex disassembly                         |                   |
| GO:0032984                                                              | 9.59230485512941e-06                                 | 7.35467128027682                                                    | 1.37492215071621  |
| 9                                                                       | 179                                                  | macromolecular complex disassembly                                  |                   |
| GO:0009201                                                              | 1.0244481206526e-05                                  | 13.8314769975787                                                    | 0.499273406684659 |
| 6                                                                       | 65                                                   | ribonucleoside triphosphate biosynthetic process                    |                   |
| GO:0009142                                                              | 1.45026023931333e-05                                 | 12.9496598639456                                                    | 0.529997924019099 |
| 6                                                                       | 69                                                   | nucleoside triphosphate biosynthetic process                        |                   |
| Tissue: Lung=>Adipose_Subcutaneous                                      | Type: cluster                                        |                                                                     |                   |
| SourceGene:                                                             | RP11-160E2.11(ENSG00000262292.1)                     |                                                                     |                   |
| TargetGeneSet:                                                          | RPL22 SDHB KIAA0090 RPL11 RP1 WASF2 DNAJC8 PPCS      |                                                                     |                   |
| RPS8 UQCRH                                                              | RPL5 RP11 HBXIP RPS27 ELL2P1 GAS5 CEP350 RPS7        |                                                                     |                   |
| BIRC6 UBC                                                               | TGOLN2 MGAT4A RPL31 CBWD2 H3F3AP4 BRK1 SLC26A6 RPL24 |                                                                     |                   |
| MRPS22 DNAJC19 MRFAP1 MRFAP1L1 CD38 PPM1K GPRIN3 RPL34 RPS3A TAF9       |                                                      |                                                                     |                   |
| BTF3 TBCA COX7C ISOC1 MTND5P11 CTB RPS14 RPL15P3 AGPAT1                 |                                                      |                                                                     |                   |
| SYNGAP1 WDR11 FOXK1 MPLKIP RPS3AP26 POLR2J MLL3 DRP2 HMBOX1 CTD         |                                                      |                                                                     |                   |
| DCTN6 HOOK3 RPS20 ARFGEF1 ESRP1 RPL30 EIF3E EIF3H RPS6 RPL35            |                                                      |                                                                     |                   |
| RPL7A SEC16A RPS24 SFR1 NSMCE4A FAM53B RPL27A RPS13 TSG101 ZBTB3        |                                                      |                                                                     |                   |
| TMEM151A MED17 CWC15 ATM UBE4A ATP5L DDX6 RPS25 PFDN5 NACA              |                                                      |                                                                     |                   |
| GNS CPM RPL6 GOLGA3 SLC35E1P1 N6AMT2 ESD COMMD6 TEP1                    |                                                      |                                                                     |                   |
| OXA1L MED6 CCNDBP1 SEC11A NDUFB10 RPS15A VPS53 WDR81 GABARAP RPL26 STX8 |                                                      |                                                                     |                   |
| RPS7P1 RPL23A ZNHIT3 RPL17 RPL19 RPL27 RPS7P11 RNF213 RPTOR DSG4        |                                                      |                                                                     |                   |
| RPS15 ZNF121 NACC1 UBA52 KRTDAP EIF3K KLK7 ZNF587 TMEM230 RP4           |                                                      |                                                                     |                   |
| NCOA3 RPL12P4 DNAJC5 ATP50 DDT EIF3D EIF3L TNRC6B USP9X HCFC1 EMD       |                                                      |                                                                     |                   |
| FUNDC2                                                                  |                                                      |                                                                     |                   |
| GOBPID Pvalue OddsRatio ExpCount Count Size Term                        |                                                      |                                                                     |                   |
| GO:0006413                                                              | 2.59532108432318e-42                                 | 52.5092328796033                                                    | 1.22012317486679  |
| 35                                                                      | 152                                                  | translational initiation                                            |                   |
| GO:0006415                                                              | 1.62419912617089e-41                                 | 81.6279069767442                                                    | 0.730468479689987 |
| 30                                                                      | 91                                                   | translational termination                                           |                   |
| GO:0006614                                                              | 3.57187374446435e-41                                 | 70.2847376788553                                                    | 0.842848245796139 |
| 31                                                                      | 105                                                  | SRP-dependent cotranslational protein targeting to membrane         |                   |
| GO:0006613                                                              | 5.01928893781292e-41                                 | 69.3427450980392                                                    | 0.850875371946578 |
| 31                                                                      | 106                                                  | cotranslational protein targeting to membrane                       |                   |
| GO:0045047                                                              | 5.01928893781292e-41                                 | 69.3427450980392                                                    | 0.850875371946578 |
| 31                                                                      | 106                                                  | protein targeting to ER                                             |                   |
| GO:0072599                                                              | 5.01928893781292e-41                                 | 69.3427450980392                                                    | 0.850875371946578 |
| 31                                                                      | 106                                                  | establishment of protein localization to endoplasmic reticulum      |                   |
| GO:0070972                                                              | 2.25327351345254e-39                                 | 59.7279242731575                                                    | 0.947200885751851 |
| 31                                                                      | 118                                                  | protein localization to endoplasmic reticulum                       |                   |
| GO:0006414                                                              | 2.45020924486043e-39                                 | 66.3255813953488                                                    | 0.842848245796139 |
| 30                                                                      | 105                                                  | translational elongation                                            |                   |
| GO:0000184                                                              | 3.02954693644464e-39                                 | 59.0450534759358                                                    | 0.95522801190229  |
| 31                                                                      | 119                                                  | nuclear-transcribed mRNA catabolic process, nonsense-mediated decay |                   |
| GO:0000956                                                              | 2.94901928077747e-37                                 | 41.5101878100638                                                    | 1.35658431942426  |

Stable4\_20PerPair

|            |     |                                                    |                  |                    |  |                    |
|------------|-----|----------------------------------------------------|------------------|--------------------|--|--------------------|
| 33         | 169 | nuclear-transcribed mRNA catabolic process         |                  |                    |  |                    |
| GO:0006402 |     | 1.86114498252538e-36                               | 38.9090153718322 |                    |  | 1.42882845477822   |
| 33         | 178 | mRNA catabolic process                             |                  |                    |  |                    |
| GO:0019080 |     | 1.08105197935443e-35                               | 43.2024509803922 |                    |  | 1.21209604871635   |
| 31         | 151 | viral genome expression                            |                  |                    |  |                    |
| GO:0019083 |     | 1.08105197935443e-35                               | 43.2024509803922 |                    |  | 1.21209604871635   |
| 31         | 151 | viral transcription                                |                  |                    |  |                    |
| GO:0006612 |     | 1.68354596780378e-35                               | 42.4882352941176 |                    |  | 1.22815030101723   |
| 31         | 153 | protein targeting to membrane                      |                  |                    |  |                    |
| GO:0006401 |     | 2.62585967334747e-34                               | 32.7387923788176 |                    |  | 1.64556086084008   |
| 33         | 205 | RNA catabolic process                              |                  |                    |  |                    |
| GO:0043624 |     | 7.0210990329592e-34                                | 40.3062960862167 |                    |  | 1.22815030101723   |
| 30         | 153 | cellular protein complex disassembly               |                  |                    |  |                    |
| GO:0043241 |     | 1.98407448707917e-33                               | 38.7182049418605 |                    |  | 1.26828593176943   |
| 30         | 158 | protein complex disassembly                        |                  |                    |  |                    |
| GO:0072594 |     | 7.17861863174953e-33                               | 31.3687707641196 |                    |  | 1.63753373468964   |
| 32         | 204 | establishment of protein localization to organelle |                  |                    |  |                    |
| GO:0019058 |     | 1.6093317035152e-32                                | 28.3875502008032 |                    |  | 1.85426614075151   |
| 33         | 231 | viral infectious cycle                             |                  |                    |  |                    |
| GO:0022415 |     | 3.50768024999193e-32                               | 25.885279516512  | 2.08705279911425   |  | 34                 |
| 260        |     | viral reproductive process                         |                  |                    |  |                    |
| GO:0034623 |     | 4.35322273150039e-32                               | 34.3774224806202 |                    |  | 1.39671995017646   |
| 30         | 174 | cellular macromolecular complex disassembly        |                  |                    |  |                    |
| GO:0032984 |     | 1.0701396096537e-31                                | 33.2121117527704 |                    |  | 1.43685558092866   |
| 30         | 179 | macromolecular complex disassembly                 |                  |                    |  |                    |
| GO:0071845 |     | 1.60462062487861e-25                               | 19.3384911188427 |                    |  | 2.27970382672479   |
| 30         | 284 | cellular component disassembly at cellular level   |                  |                    |  |                    |
| GO:0022411 |     | 2.43955813941746e-25                               | 19.0332612222823 |                    |  | 2.31181233132655   |
| 30         | 288 | cellular component disassembly                     |                  |                    |  |                    |
| GO:0016032 |     | 3.0186688141698e-25                                | 14.4576507597341 |                    |  | 3.62023389384818   |
| 35         | 451 | viral reproduction                                 |                  |                    |  |                    |
| GO:0033365 |     | 1.50678394882498e-24                               | 13.7097637972828 |                    |  | 3.79683066915784   |
| 35         | 473 | protein localization to organelle                  |                  |                    |  |                    |
| GO:0006605 |     | 1.617776013179e-24                                 | 13.677549987345  | 3.80485779530828   |  | 35                 |
| 474        |     | protein targeting                                  |                  |                    |  |                    |
| GO:0042274 |     | 5.29092247522081e-11                               | 83.6263552960801 |                    |  | 0.144488270707909  |
| 7          | 18  | ribosomal small subunit biogenesis                 |                  |                    |  |                    |
| GO:0071843 |     | 7.63415018523914e-10                               | 9.35577263083451 |                    |  | 1.91848314995502   |
| 15         | 239 | cellular component biogenesis at cellular level    |                  |                    |  |                    |
| GO:0022613 |     | 3.26822337374959e-09                               | 9.18762196821857 |                    |  | 1.80610338384887   |
| 14         | 225 | ribonucleoprotein complex biogenesis               |                  |                    |  |                    |
| GO:0042254 |     | 3.00501739088863e-08                               | 10.7775707384403 |                    |  | 1.19604179641547   |
| 11         | 149 | ribosome biogenesis                                |                  |                    |  |                    |
| GO:0006364 |     | 1.46867009016005e-07                               | 12.6079685194294 |                    |  | 0.834821119645699  |
| 9          | 104 | rRNA processing                                    |                  |                    |  |                    |
| GO:0016072 |     | 2.38452828197917e-07                               | 11.853983529194  | 0.882983876548336  |  | 9                  |
| 110        |     | rRNA metabolic process                             |                  |                    |  |                    |
| GO:0000028 |     | 9.90432079028175e-06                               | 126.83185840708  | 0.0481627569026365 |  | 3                  |
| 6          |     | ribosomal small subunit assembly                   |                  |                    |  |                    |
| GO:0030490 |     | 1.72309942510636e-05                               | 95.1172566371681 |                    |  | 0.0561898830530759 |
| 3          | 7   | maturation of SSU-rRNA                             |                  |                    |  |                    |

Tissue: Lung=>Adipose\_Subcutaneous Type: asymmetric

SourceGene: RP11-407G23.3(ENSG00000260946.1)

|                |          |         |          |       |         |         |        |         |          |
|----------------|----------|---------|----------|-------|---------|---------|--------|---------|----------|
| TargetGeneSet: | RPL22    | IGSF21  | C1QC     | RPL11 | C1orf38 | DNAJC8  | THRAP3 | MEAF6   | RPS8     |
| RPL5           | RP11     | KCNA2   | PTPN22   | BOLA1 | MRPL9   | LCE1C   | SPRR2G | FCGR2A  | NCF2     |
| TSEN15         | PTPRC    | RPS7    | REL      | GMCL1 | VAMP5   | MMADHC  | HOXD8  | SLC11A1 | RPL32    |
| RPL15          | RPL24    | NR1I2   | HCLS1    | CD86  | RYK     | DNAJC19 | HTT    | ENOPH1  | DAPP1    |
| RPL34          | RPS3A    | TLR2    | MARCH1   | FYB   | SLC30A5 | BTF3    | SKP1   | CTB     | RPS14    |
| DOCK2          | GNB2L1   | RPL15P3 | RPS18    | WDR11 | REV3L   | RWDD1   | IGF2R  | RNASET2 | ZNF117   |
| CACNA2D1       |          | GNG11   | RPS3AP26 |       | TBXAS1  | MLL3    | MSR1   | CTD     | THAP1    |
| HOOK3          | RPL30    | VPS13B  | UBR5     | SLA   | TRAPPC9 | EEF1D   | RPL8   | RPS6    | RPL35    |
| RPL7A          | C10orf31 |         | ALOX5    | DDX50 | RPS24   | RPS3AP5 | BCCIP  | CHID1   | KCNQ1    |
| BTBD10         | RPS13    | TSG101  | LRRCS55  | TRPT1 | KRT17   | AIP     | SPCS2  | SLCO2B1 | TMEM126B |

Stable4\_20PerPair

| GO:ID      | Gene                                                                                       | Term                                                                | Pvalue               | OddsRatio        | ExpCount          | Count | Size | Term |
|------------|--------------------------------------------------------------------------------------------|---------------------------------------------------------------------|----------------------|------------------|-------------------|-------|------|------|
| GO:0006415 | DDX6 C12orf57 ARHGAP9 U6 MED4 COMMD6 MEFV RPS15A ACOX1 RP13 RPL18 RPL13A EIF3L RPL3 GOBPID | translational termination                                           | 8.90260066887873e-39 | 63.7108792846498 | 0.881599889281019 |       |      |      |
| GO:0006414 | CD163 ACTR6 RPL18AP3 IFI27L1 C15orf41 RPL6 RPL6 RP1 TPT1 ESD                               | translational elongation                                            | 2.45146164253578e-38 | 54.7169600793454 | 1.0172306414781   | 31    |      |      |
| GO:0006614 | RIN3 RPL26 RPS7P1 RPL17 RPL19 RPL27 RPS3AP6 AKAP13 MPG                                     | SRP-dependent cotranslational protein targeting to membrane         | 2.45146164253578e-38 | 54.7169600793454 | 1.0172306414781   | 31    |      |      |
| GO:0006613 | PTPRS MYO1F BRD4 KRTDAP CEACAM4 C5AR1 GPR77                                                | cotranslational protein targeting to membrane                       | 3.43924825166242e-38 | 53.9836085626911 | 1.02691855234932  |       |      |      |
| GO:0045047 | RPL13A LENG1 LILRB3 LAIR1 RPS5 PCNA CTSA ATP50 THAP7                                       | protein targeting to ER                                             | 3.43924825166242e-38 | 53.9836085626911 | 1.02691855234932  |       |      |      |
| GO:0072599 | TNRC6B ST13 C22orf32 NCAPH2 TLR8 WAS RPS4X NXF3                                            | establishment of protein localization to endoplasmic reticulum      | 3.43924825166242e-38 | 53.9836085626911 | 1.02691855234932  |       |      |      |
| GO:0070972 | GOBPID                                                                                     | protein localization to endoplasmic reticulum                       | 1.51404976931951e-36 | 46.498365496151  | 1.14317348280396  | 31    |      |      |
| GO:0000184 | GOBPID                                                                                     | nuclear-transcribed mRNA catabolic process, nonsense-mediated decay | 9.16360688403386e-35 | 43.5812053115424 | 1.15286139367518  |       |      |      |
| GO:0006413 | GOBPID                                                                                     | translational initiation                                            | 8.58274082744216e-33 | 33.3527939949958 | 1.47256245242544  |       |      |      |
| GO:0006612 | GOBPID                                                                                     | protein targeting to membrane                                       | 1.06842080691773e-32 | 33.0770792600391 | 1.48225036329666  |       |      |      |
| GO:0072594 | GOBPID                                                                                     | establishment of protein localization to organelle                  | 2.1385152007553e-31  | 25.5025414002295 | 1.97633381772888  |       |      |      |
| GO:0019080 | GOBPID                                                                                     | viral genome expression                                             | 2.27838923299197e-31 | 31.9834710743802 | 1.46287454155422  |       |      |      |
| GO:0019083 | GOBPID                                                                                     | viral transcription                                                 | 2.27838923299197e-31 | 31.9834710743802 | 1.46287454155422  |       |      |      |
| GO:0000956 | GOBPID                                                                                     | nuclear-transcribed mRNA catabolic process                          | 2.88251403007626e-31 | 29.2090812391969 | 1.63725693723618  |       |      |      |
| GO:0043624 | GOBPID                                                                                     | cellular protein complex disassembly                                | 3.47869053599559e-31 | 31.4589800443459 | 1.48225036329666  |       |      |      |
| GO:0043241 | GOBPID                                                                                     | protein complex disassembly                                         | 9.75045185487522e-31 | 30.2194602272727 | 1.53068991765276  |       |      |      |
| GO:0006402 | GOBPID                                                                                     | mRNA catabolic process                                              | 1.57733266169576e-30 | 27.4033576733446 | 1.72444813507716  |       |      |      |
| GO:0006401 | GOBPID                                                                                     | RNA catabolic process                                               | 6.33025622993196e-30 | 24.2140869192892 | 1.9860217286001   | 32    |      |      |
| GO:0034623 | GOBPID                                                                                     | cellular macromolecular complex disassembly                         | 2.08415886227826e-29 | 26.8314393939394 | 1.68569649159228  |       |      |      |
| GO:0032984 | GOBPID                                                                                     | macromolecular complex disassembly                                  | 5.08174098584053e-29 | 25.921903599756  | 1.73413604594838  | 30    |      |      |
| GO:0019058 | GOBPID                                                                                     | viral infectious cycle                                              | 6.69876711852795e-27 | 20.0661009174312 | 2.23790741125182  |       |      |      |
| GO:0033365 | GOBPID                                                                                     | protein localization to organelle                                   | 6.8736100075274e-27  | 12.8203233256351 | 4.58238184208705  |       |      |      |
| GO:0006605 | GOBPID                                                                                     | protein targeting                                                   | 9.44776718180015e-26 | 12.317377944691  | 4.59206975295827  | 39    |      |      |
| GO:0022415 | GOBPID                                                                                     | viral reproductive process                                          | 2.69705410457792e-25 | 17.4889627819398 | 2.5188568265172   | 31    |      |      |
| GO:0071845 | GOBPID                                                                                     | cellular component disassembly at cellular level                    | 6.41542633135444e-23 | 15.0934144595562 | 2.75136668742648  |       |      |      |
| GO:0022411 | GOBPID                                                                                     | cellular component disassembly                                      | 9.68968918339025e-23 | 14.8551797040169 | 2.79011833091136  |       |      |      |
| GO:0016032 | GOBPID                                                                                     | viral reproduction                                                  | 3.78840189522482e-20 | 10.2506148548942 | 4.36924780292021  |       |      |      |
| GO:0042274 | GOBPID                                                                                     |                                                                     | 6.15001974211389e-07 | 40.7350427350427 | 0.17438239568196  |       |      |      |

Stable4\_20PerPair

|                                                  |          |                                                                     |                  |                  |          |          |         |         |                    |
|--------------------------------------------------|----------|---------------------------------------------------------------------|------------------|------------------|----------|----------|---------|---------|--------------------|
| 5                                                | 18       | ribosomal small subunit biogenesis                                  |                  |                  |          |          |         |         |                    |
| GO:0042254                                       |          | 1.83285082907639e-06                                                | 7.84283342556724 |                  |          |          |         |         | 1.44349871981178   |
| 10                                               | 149      | ribosome biogenesis                                                 |                  |                  |          |          |         |         |                    |
| GO:0022613                                       |          | 1.91185981805711e-06                                                | 6.20510563380282 |                  |          |          |         |         | 2.1797799460245 12 |
| 225                                              |          | ribonucleoprotein complex biogenesis                                |                  |                  |          |          |         |         |                    |
| GO:0071843                                       |          | 3.57861456959509e-06                                                | 5.81662995594714 |                  |          |          |         |         | 2.31541069822158   |
| 12                                               | 239      | cellular component biogenesis at cellular level                     |                  |                  |          |          |         |         |                    |
| GO:0006364                                       |          | 7.47797117621961e-06                                                | 8.97411616161616 |                  |          |          |         |         | 1.00754273060688   |
| 8                                                | 104      | rRNA processing                                                     |                  |                  |          |          |         |         |                    |
| GO:0016072                                       |          | 1.13291539428615e-05                                                | 8.44266191325015 |                  |          |          |         |         | 1.0656701958342 8  |
| 110                                              |          | rRNA metabolic process                                              |                  |                  |          |          |         |         |                    |
| Tissue: Lung=>Adipose_Subcutaneous Type: cluster |          |                                                                     |                  |                  |          |          |         |         |                    |
| SourceGene: RP11-407G23.3(ENSG00000260946.1)     |          |                                                                     |                  |                  |          |          |         |         |                    |
| TargetGeneSet:                                   | RPL22    | IGSF21                                                              | C1QC             | RPL11            | C1orf38  | DNAJC8   | THRAP3  | MEAF6   | RPS8               |
| RPL5                                             | RP11     | KCNA2                                                               | PTPN22           | BOLA1            | MRPL9    | LCE1C    | SPRR2G  | FCGR2A  | NCF2               |
| TSEN15                                           | PTPRC    | RPS7                                                                | REL              | GMCL1            | VAMP5    | MMADHC   | HOXD8   | SLC11A1 | RPL32              |
| RPL15                                            | RPL24    | NR1I2                                                               | HCLS1            | CD86             | RYK      | DNAJC19  | HTT     | ENOPH1  | DAPP1              |
| RPL34                                            | RPS3A    | TLR2                                                                | MARCH1           | FYB              | SLC30A5  | BTFF3    | SKP1    | CTB     | RPS14              |
| DOCK2                                            | GNB2L1   | RPL15P3                                                             | RPS18            | WDR11            | REV3L    | RWDD1    | IGF2R   | RNASET2 | ZNF117             |
| CACNA2D1                                         |          | GNG11                                                               | RPS3AP26         |                  | TRXAS1   | MLL3     | MSR1    | CTD     | THAP1              |
| HOOK3                                            | RPL30    | VPS13B                                                              | UBR5             | SLA              | TRAPPC9  | EEF1D    | RPL8    | RPS6    | RPL35              |
| RPL7A                                            | C10orf31 |                                                                     | ALOX5            | DDX50            | RPS24    | RPS3AP5  | BCCIP   | CHID1   | KCNQ1              |
| BTBD10                                           | RPS13    | TSG101                                                              | LRRC55           | TRPT1            | KRT17    | AIP      | SPCS2   | SLCO2B1 | TMEM126B           |
| DDX6                                             | C12orf57 |                                                                     | CD163            | ITPR2            | MCRS1    | C12orf44 |         | PFDN5   | NACA               |
| ARHGAP9                                          | U6       | TMBIM4                                                              | ACTR6            | RPL18AP3         | SELPLG   | RPL6     |         | RP1     | TPT1               |
| MED4                                             | COMMD6   | TEP1                                                                | RIN3             | IFI27L1          | C15orf41 |          | PLCB2   | RPS3AP6 | AKAP13             |
| MEFV                                             | RPS15A   | ADCY7                                                               | RPL26            | RPS7P1           | RPL17    | RPL19    | RPL27   | RPS7P11 | SUMO2              |
| ACOX1                                            | RP13     | LINGO3                                                              | PTPRS            | MYO1F            | BRD4     | KRTDAP   | CEACAM4 | C5AR1   | GPR77              |
| RPL18                                            | RPL13A   | LENG1                                                               | LILRB3           | LAIR1            | RPS5     | PCNA     | CTSA    | ATP50   | THAP7              |
| EIF3L                                            | RPL3     | TNRC6B                                                              | ST13             | C22orf32         |          | NCAPH2   | TLR8    | WAS     | RPS4X              |
| GOBPID                                           | Pvalue   | OddsRatio                                                           | ExpCount         | Count            | Size     | Term     |         |         |                    |
| GO:0006415                                       |          | 8.90260066887873e-39                                                | 63.7108792846498 |                  |          |          |         |         | 0.881599889281019  |
| 30                                               | 91       | translational termination                                           |                  |                  |          |          |         |         |                    |
| GO:0006414                                       |          | 2.45146164253578e-38                                                | 54.7169600793454 |                  |          |          |         |         | 1.0172306414781 31 |
| 105                                              |          | translational elongation                                            |                  |                  |          |          |         |         |                    |
| GO:0006614                                       |          | 2.45146164253578e-38                                                | 54.7169600793454 |                  |          |          |         |         | 1.0172306414781 31 |
| 105                                              |          | SRP-dependent cotranslational protein targeting to membrane         |                  |                  |          |          |         |         |                    |
| GO:0006613                                       |          | 3.43924825166242e-38                                                | 53.9836085626911 |                  |          |          |         |         | 1.02691855234932   |
| 31                                               | 106      | cotranslational protein targeting to membrane                       |                  |                  |          |          |         |         |                    |
| GO:0045047                                       |          | 3.43924825166242e-38                                                | 53.9836085626911 |                  |          |          |         |         | 1.02691855234932   |
| 31                                               | 106      | protein targeting to ER                                             |                  |                  |          |          |         |         |                    |
| GO:0072599                                       |          | 3.43924825166242e-38                                                | 53.9836085626911 |                  |          |          |         |         | 1.02691855234932   |
| 31                                               | 106      | establishment of protein localization to endoplasmic reticulum      |                  |                  |          |          |         |         |                    |
| GO:0070972                                       |          | 1.51404976931951e-36                                                | 46.498365496151  | 1.14317348280396 |          |          |         |         | 31                 |
| 118                                              |          | protein localization to endoplasmic reticulum                       |                  |                  |          |          |         |         |                    |
| GO:0000184                                       |          | 9.16360688403386e-35                                                | 43.5812053115424 |                  |          |          |         |         | 1.15286139367518   |
| 30                                               | 119      | nuclear-transcribed mRNA catabolic process, nonsense-mediated decay |                  |                  |          |          |         |         |                    |
| GO:0006413                                       |          | 8.58274082744216e-33                                                | 33.3527939949958 |                  |          |          |         |         | 1.47256245242544   |
| 31                                               | 152      | translational initiation                                            |                  |                  |          |          |         |         |                    |
| GO:0006612                                       |          | 1.06842080691773e-32                                                | 33.0770792600391 |                  |          |          |         |         | 1.48225036329666   |
| 31                                               | 153      | protein targeting to membrane                                       |                  |                  |          |          |         |         |                    |
| GO:0072594                                       |          | 2.1385152007553e-31                                                 | 25.5025414002295 |                  |          |          |         |         | 1.97633381772888   |
| 33                                               | 204      | establishment of protein localization to organelle                  |                  |                  |          |          |         |         |                    |
| GO:0019080                                       |          | 2.27838923299197e-31                                                | 31.9834710743802 |                  |          |          |         |         | 1.46287454155422   |
| 30                                               | 151      | viral genome expression                                             |                  |                  |          |          |         |         |                    |
| GO:0019083                                       |          | 2.27838923299197e-31                                                | 31.9834710743802 |                  |          |          |         |         | 1.46287454155422   |
| 30                                               | 151      | viral transcription                                                 |                  |                  |          |          |         |         |                    |
| GO:0000956                                       |          | 2.88251403007626e-31                                                | 29.2090812391969 |                  |          |          |         |         | 1.63725693723618   |
| 31                                               | 169      | nuclear-transcribed mRNA catabolic process                          |                  |                  |          |          |         |         |                    |
| GO:0043624                                       |          | 3.47869053599559e-31                                                | 31.4589800443459 |                  |          |          |         |         | 1.48225036329666   |
| 30                                               | 153      | cellular protein complex disassembly                                |                  |                  |          |          |         |         |                    |
| GO:0043241                                       |          | 9.75045185487522e-31                                                | 30.2194602272727 |                  |          |          |         |         | 1.53068991765276   |
| 30                                               | 158      | protein complex disassembly                                         |                  |                  |          |          |         |         |                    |

Stable4\_20PerPair

|                                    |                         |                                                  |                     |         |        |                                                                     |        |          |          |      |
|------------------------------------|-------------------------|--------------------------------------------------|---------------------|---------|--------|---------------------------------------------------------------------|--------|----------|----------|------|
| GO:0006402                         | 1.57733266169576e-30    | 27.4033576733446                                 | 1.72444813507716    |         |        |                                                                     |        |          |          |      |
| 31                                 | 178                     | mRNA catabolic process                           |                     |         |        |                                                                     |        |          |          |      |
| GO:0006401                         | 6.33025622993196e-30    | 24.2140869192892                                 | 1.9860217286001 32  |         |        |                                                                     |        |          |          |      |
| 205                                |                         | RNA catabolic process                            |                     |         |        |                                                                     |        |          |          |      |
| GO:0034623                         | 2.08415886227826e-29    | 26.8314393939394                                 | 1.68569649159228    |         |        |                                                                     |        |          |          |      |
| 30                                 | 174                     | cellular macromolecular complex disassembly      |                     |         |        |                                                                     |        |          |          |      |
| GO:0032984                         | 5.08174098584053e-29    | 25.921903599756                                  | 1.73413604594838 30 |         |        |                                                                     |        |          |          |      |
| 179                                |                         | macromolecular complex disassembly               |                     |         |        |                                                                     |        |          |          |      |
| GO:0019058                         | 6.69876711852795e-27    | 20.0661009174312                                 | 2.23790741125182    |         |        |                                                                     |        |          |          |      |
| 31                                 | 231                     | viral infectious cycle                           |                     |         |        |                                                                     |        |          |          |      |
| GO:0033365                         | 6.8736100075274e-27     | 12.8203233256351                                 | 4.58238184208705    |         |        |                                                                     |        |          |          |      |
| 40                                 | 473                     | protein localization to organelle                |                     |         |        |                                                                     |        |          |          |      |
| GO:0006605                         | 9.44776718180015e-26    | 12.317377944691                                  | 4.59206975295827 39 |         |        |                                                                     |        |          |          |      |
| 474                                |                         | protein targeting                                |                     |         |        |                                                                     |        |          |          |      |
| GO:0022415                         | 2.69705410457792e-25    | 17.4889627819398                                 | 2.5188568265172 31  |         |        |                                                                     |        |          |          |      |
| 260                                |                         | viral reproductive process                       |                     |         |        |                                                                     |        |          |          |      |
| GO:0071845                         | 6.41542633135444e-23    | 15.0934144595562                                 | 2.75136668742648    |         |        |                                                                     |        |          |          |      |
| 30                                 | 284                     | cellular component disassembly at cellular level |                     |         |        |                                                                     |        |          |          |      |
| GO:0022411                         | 9.68968918339025e-23    | 14.8551797040169                                 | 2.79011833091136    |         |        |                                                                     |        |          |          |      |
| 30                                 | 288                     | cellular component disassembly                   |                     |         |        |                                                                     |        |          |          |      |
| GO:0016032                         | 3.78840189522482e-20    | 10.2506148548942                                 | 4.36924780292021    |         |        |                                                                     |        |          |          |      |
| 33                                 | 451                     | viral reproduction                               |                     |         |        |                                                                     |        |          |          |      |
| GO:0042274                         | 6.15001974211389e-07    | 40.7350427350427                                 | 0.17438239568196    |         |        |                                                                     |        |          |          |      |
| 5                                  | 18                      | ribosomal small subunit biogenesis               |                     |         |        |                                                                     |        |          |          |      |
| GO:0042254                         | 1.83285082907639e-06    | 7.84283342556724                                 | 1.44349871981178    |         |        |                                                                     |        |          |          |      |
| 10                                 | 149                     | ribosome biogenesis                              |                     |         |        |                                                                     |        |          |          |      |
| GO:0022613                         | 1.91185981805711e-06    | 6.20510563380282                                 | 2.1797799460245 12  |         |        |                                                                     |        |          |          |      |
| 225                                |                         | ribonucleoprotein complex biogenesis             |                     |         |        |                                                                     |        |          |          |      |
| GO:0071843                         | 3.57861456959509e-06    | 5.81662995594714                                 | 2.31541069822158    |         |        |                                                                     |        |          |          |      |
| 12                                 | 239                     | cellular component biogenesis at cellular level  |                     |         |        |                                                                     |        |          |          |      |
| GO:0006364                         | 7.47797117621961e-06    | 8.97411616161616                                 | 1.00754273060688    |         |        |                                                                     |        |          |          |      |
| 8                                  | 104                     | rRNA processing                                  |                     |         |        |                                                                     |        |          |          |      |
| GO:0016072                         | 1.13291539428615e-05    | 8.44266191325015                                 | 1.0656701958342 8   |         |        |                                                                     |        |          |          |      |
| 110                                |                         | rRNA metabolic process                           |                     |         |        |                                                                     |        |          |          |      |
| Tissue: Lung=>Adipose_Subcutaneous | Type:                   | asymmetric                                       |                     |         |        |                                                                     |        |          |          |      |
| SourceGene:                        | SIT1(ENSG00000137078.4) |                                                  |                     |         |        |                                                                     |        |          |          |      |
| TargetGeneSet:                     | MRPL20                  | RPL22                                            | DNAJC8              | TAF12   | MAGOH  | JTB                                                                 | RPS27  | RP11     |          |      |
| RAB4A                              | ILKAP                   | RPL24                                            | GRPEL1              | RPS3A   | GPBP1  | RPS10                                                               | CHCHD2 | RPS3AP26 | CUX1     |      |
| RPL12                              | RPS3AP5                 | RPL27A                                           | ARHGAP1             | ZNHIT2  | MED17  | CWC15                                                               | RPS25  | RPL6     | MED6     | DLK1 |
| SIVA1                              | RPS15A                  | KAT8                                             | RNASEK              | ALOX12B | ZNHIT3 | RPL17                                                               | RNF126 | DOHH     | C19orf43 |      |
| AXL                                | GPR77                   | RPL18                                            | DDT                 |         |        |                                                                     |        |          |          |      |
| GOBPID                             | Pvalue                  | OddsRatio                                        | ExpCount            | Count   | Size   | Term                                                                |        |          |          |      |
| GO:0000184                         | 1.23316123375953e-18    | 73.1147798742138                                 | 0.304684796899869   |         |        | nuclear-transcribed mRNA catabolic process, nonsense-mediated decay |        |          |          |      |
| 13                                 | 119                     |                                                  |                     |         |        |                                                                     |        |          |          |      |
| GO:0006415                         | 2.98749533634624e-18    | 87.0987341772152                                 | 0.232994256452841   |         |        | translational termination                                           |        |          |          |      |
| 12                                 | 91                      |                                                  |                     |         |        |                                                                     |        |          |          |      |
| GO:0006414                         | 1.80689935585985e-17    | 73.9148387096774                                 | 0.268839526676355   |         |        | translational elongation                                            |        |          |          |      |
| 12                                 | 105                     |                                                  |                     |         |        |                                                                     |        |          |          |      |
| GO:0006614                         | 1.80689935585985e-17    | 73.9148387096774                                 | 0.268839526676355   |         |        | SRP-dependent cotranslational protein targeting to membrane         |        |          |          |      |
| 12                                 | 105                     |                                                  |                     |         |        |                                                                     |        |          |          |      |
| GO:0006613                         | 2.03429421514149e-17    | 73.1234042553191                                 | 0.271399903120891   |         |        | cotranslational protein targeting to membrane                       |        |          |          |      |
| 12                                 | 106                     |                                                  |                     |         |        |                                                                     |        |          |          |      |
| GO:0045047                         | 2.03429421514149e-17    | 73.1234042553191                                 | 0.271399903120891   |         |        | protein targeting to ER                                             |        |          |          |      |
| 12                                 | 106                     |                                                  |                     |         |        |                                                                     |        |          |          |      |
| GO:0072599                         | 2.03429421514149e-17    | 73.1234042553191                                 | 0.271399903120891   |         |        | establishment of protein localization to endoplasmic reticulum      |        |          |          |      |
| 12                                 | 106                     |                                                  |                     |         |        |                                                                     |        |          |          |      |
| GO:0070972                         | 7.73556153387231e-17    | 64.7909433962264                                 | 0.302124420455332   |         |        | protein localization to endoplasmic reticulum                       |        |          |          |      |
| 12                                 | 118                     |                                                  |                     |         |        |                                                                     |        |          |          |      |
| GO:0000956                         | 1.34046564043452e-16    | 49.5069444444444                                 | 0.432703619126704   |         |        | nuclear-transcribed mRNA catabolic process                          |        |          |          |      |
| 13                                 | 169                     |                                                  |                     |         |        |                                                                     |        |          |          |      |
| GO:0006402                         | 2.65916559860613e-16    | 46.7770202020202                                 | 0.455747007127534   |         |        | mRNA catabolic process                                              |        |          |          |      |
| 13                                 | 178                     |                                                  |                     |         |        |                                                                     |        |          |          |      |
| GO:0072594                         | 1.59305806352616e-15    | 40.3357329842932                                 | 0.522316794685489   |         |        |                                                                     |        |          |          |      |

Stable4\_20PerPair

|                |                            |                                                                     |                  |                   |        |                   |       |          |    |
|----------------|----------------------------|---------------------------------------------------------------------|------------------|-------------------|--------|-------------------|-------|----------|----|
| 13             | 204                        | establishment of protein localization to organelle                  |                  |                   |        |                   |       |          |    |
| GO:0019080     |                            | 1.61037838056575e-15                                                | 49.294964028777  | 0.386616843125043 |        |                   |       |          | 12 |
| 151            |                            | viral genome expression                                             |                  |                   |        |                   |       |          |    |
| GO:0019083     |                            | 1.61037838056575e-15                                                | 49.294964028777  | 0.386616843125043 |        |                   |       |          | 12 |
| 151            |                            | viral transcription                                                 |                  |                   |        |                   |       |          |    |
| GO:0006401     |                            | 1.69826728764919e-15                                                | 40.1228298611111 | 0.524877171130026 |        |                   |       |          |    |
| 13             | 205                        | RNA catabolic process                                               |                  |                   |        |                   |       |          |    |
| GO:0006413     |                            | 1.74559508534522e-15                                                | 48.9394285714286 | 0.38917721956958  |        |                   |       |          |    |
| 12             | 152                        | translational initiation                                            |                  |                   |        |                   |       |          |    |
| GO:0006612     |                            | 1.89110575840793e-15                                                | 48.5889361702128 | 0.391737596014117 |        |                   |       |          |    |
| 12             | 153                        | protein targeting to membrane                                       |                  |                   |        |                   |       |          |    |
| GO:0043624     |                            | 1.89110575840793e-15                                                | 48.5889361702128 | 0.391737596014117 |        |                   |       |          |    |
| 12             | 153                        | cellular protein complex disassembly                                |                  |                   |        |                   |       |          |    |
| GO:0043241     |                            | 2.79924691482103e-15                                                | 46.9084931506849 | 0.4045394782368   |        |                   |       |          | 12 |
| 158            |                            | protein complex disassembly                                         |                  |                   |        |                   |       |          |    |
| GO:0034623     |                            | 9.03722727194804e-15                                                | 42.2281481481482 | 0.445505501349388 |        |                   |       |          |    |
| 12             | 174                        | cellular macromolecular complex disassembly                         |                  |                   |        |                   |       |          |    |
| GO:0032984     |                            | 1.27346671987408e-14                                                | 40.9494610778443 | 0.458307383572071 |        |                   |       |          |    |
| 12             | 179                        | macromolecular complex disassembly                                  |                  |                   |        |                   |       |          |    |
| GO:0019058     |                            | 2.72312793902935e-13                                                | 31.1123287671233 | 0.59144695868798  |        |                   |       |          |    |
| 12             | 231                        | viral infectious cycle                                              |                  |                   |        |                   |       |          |    |
| GO:0022415     |                            | 1.10991614205457e-12                                                | 27.418064516129  | 0.665697875579545 |        |                   |       |          | 12 |
| 260            |                            | viral reproductive process                                          |                  |                   |        |                   |       |          |    |
| GO:0071845     |                            | 3.14852810412604e-12                                                | 24.9564705882353 | 0.727146910248426 |        |                   |       |          |    |
| 12             | 284                        | cellular component disassembly at cellular level                    |                  |                   |        |                   |       |          |    |
| GO:0022411     |                            | 3.71207946366908e-12                                                | 24.5878260869565 | 0.737388416026573 |        |                   |       |          |    |
| 12             | 288                        | cellular component disassembly                                      |                  |                   |        |                   |       |          |    |
| GO:0016032     |                            | 4.03999074838108e-11                                                | 17.2838660578387 | 1.15472977648606  |        |                   |       |          |    |
| 13             | 451                        | viral reproduction                                                  |                  |                   |        |                   |       |          |    |
| GO:0033365     |                            | 7.3062961268106e-11                                                 | 16.4313405797101 | 1.21105805826586  |        |                   |       |          |    |
| 13             | 473                        | protein localization to organelle                                   |                  |                   |        |                   |       |          |    |
| GO:0006605     |                            | 7.50042751609051e-11                                                | 16.3945227765727 | 1.2136184347104   |        |                   |       |          | 13 |
| 474            |                            | protein targeting                                                   |                  |                   |        |                   |       |          |    |
| Tissue:        | Adipose_Subcutaneous=>Lung | Type:                                                               | asymmetric       |                   |        |                   |       |          |    |
| SourceGene:    | WDFY3(ENSG00000163625.11)  |                                                                     |                  |                   |        |                   |       |          |    |
| TargetGeneSet: | RPL22                      | RPL11                                                               | CSMD2            | RPS27             | SHE    | EIF3FP3           | RPL31 | KRT18P17 |    |
| RP11           | RPL34                      | RPL37                                                               | EEF1A1P19        | EEF1A1            | POT1   | RPL30             | PLIN2 | ZFAND5   |    |
| RPS13          | NACA                       | POP5                                                                | RPL4             | TMCO7             | DNAAF1 | FAM108A7P         | RPL19 | MARCH10  |    |
| RPS11          |                            |                                                                     |                  |                   |        |                   |       |          |    |
| GOBPID         | Pvalue                     | OddsRatio                                                           | ExpCount         | Count             | Size   | Term              |       |          |    |
| GO:0006414     |                            | 1.35985670371787e-21                                                | 231.258064516129 |                   |        | 0.1453186630683   |       |          | 12 |
| 105            |                            | translational elongation                                            |                  |                   |        |                   |       |          |    |
| GO:0006415     |                            | 5.30064694715127e-20                                                | 219.251388888889 |                   |        | 0.12594284132586  |       |          |    |
| 11             | 91                         | translational termination                                           |                  |                   |        |                   |       |          |    |
| GO:0006614     |                            | 2.76818952993206e-19                                                | 186.414893617021 |                   |        | 0.1453186630683   |       |          | 11 |
| 105            |                            | SRP-dependent cotranslational protein targeting to membrane         |                  |                   |        |                   |       |          |    |
| GO:0006613     |                            | 3.08694207198322e-19                                                | 184.439766081871 |                   |        | 0.146702650335617 |       |          |    |
| 11             | 106                        | cotranslational protein targeting to membrane                       |                  |                   |        |                   |       |          |    |
| GO:0045047     |                            | 3.08694207198322e-19                                                | 184.439766081871 |                   |        | 0.146702650335617 |       |          |    |
| 11             | 106                        | protein targeting to ER                                             |                  |                   |        |                   |       |          |    |
| GO:0072599     |                            | 3.08694207198322e-19                                                | 184.439766081871 |                   |        | 0.146702650335617 |       |          |    |
| 11             | 106                        | establishment of protein localization to endoplasmic reticulum      |                  |                   |        |                   |       |          |    |
| GO:0070972     |                            | 1.05519204053085e-18                                                | 163.617860851506 |                   |        | 0.163310497543423 |       |          |    |
| 11             | 118                        | protein localization to endoplasmic reticulum                       |                  |                   |        |                   |       |          |    |
| GO:0000184     |                            | 1.1619967546663e-18                                                 | 162.091563786008 |                   |        | 0.16469448481074  |       |          |    |
| 11             | 119                        | nuclear-transcribed mRNA catabolic process, nonsense-mediated decay |                  |                   |        |                   |       |          |    |
| GO:0019080     |                            | 1.73719940600089e-17                                                | 124.762698412698 |                   |        | 0.208982077364888 |       |          |    |
| 11             | 151                        | viral genome expression                                             |                  |                   |        |                   |       |          |    |
| GO:0019083     |                            | 1.73719940600089e-17                                                | 124.762698412698 |                   |        | 0.208982077364888 |       |          |    |
| 11             | 151                        | viral transcription                                                 |                  |                   |        |                   |       |          |    |
| GO:0006413     |                            | 1.87164661224655e-17                                                | 123.869188337273 |                   |        | 0.210366064632205 |       |          |    |
| 11             | 152                        | translational initiation                                            |                  |                   |        |                   |       |          |    |
| GO:0006612     |                            | 2.01547134919857e-17                                                | 122.988262910798 |                   |        | 0.211750051899523 |       |          |    |

Stable4\_20PerPair

|                                              |         |                                                    |                  |                   |           |                    |           |                   |          |
|----------------------------------------------|---------|----------------------------------------------------|------------------|-------------------|-----------|--------------------|-----------|-------------------|----------|
| 11                                           | 153     | protein targeting to membrane                      |                  |                   |           |                    |           |                   |          |
| GO:0043624                                   |         | 2.01547134919857e-17                               | 122.988262910798 |                   |           |                    |           | 0.211750051899523 |          |
| 11                                           | 153     | cellular protein complex disassembly               |                  |                   |           |                    |           |                   |          |
| GO:0043241                                   |         | 2.89682250741231e-17                               | 118.763416477702 |                   |           |                    |           | 0.218669988236108 |          |
| 11                                           | 158     | protein complex disassembly                        |                  |                   |           |                    |           |                   |          |
| GO:0000956                                   |         | 6.17981707707572e-17                               | 110.409985935302 |                   |           |                    |           | 0.233893848176597 |          |
| 11                                           | 169     | nuclear-transcribed mRNA catabolic process         |                  |                   |           |                    |           |                   |          |
| GO:0034623                                   |         | 8.57523165633006e-17                               | 106.985685071575 |                   |           |                    |           | 0.240813784513182 |          |
| 11                                           | 174     | cellular macromolecular complex disassembly        |                  |                   |           |                    |           |                   |          |
| GO:0006402                                   |         | 1.10671254440759e-16                               | 104.393878908849 |                   |           |                    |           | 0.246349733582451 |          |
| 11                                           | 178     | mRNA catabolic process                             |                  |                   |           |                    |           |                   |          |
| GO:0032984                                   |         | 1.17849536408632e-16                               | 103.765211640212 |                   |           |                    |           | 0.247733720849768 |          |
| 11                                           | 179     | macromolecular complex disassembly                 |                  |                   |           |                    |           |                   |          |
| GO:0072594                                   |         | 5.08842463871518e-16                               | 90.1658031088083 |                   |           |                    |           | 0.282333402532697 |          |
| 11                                           | 204     | establishment of protein localization to organelle |                  |                   |           |                    |           |                   |          |
| GO:0006401                                   |         | 5.37383564971277e-16                               | 89.6947308132875 |                   |           |                    |           | 0.283717389800014 |          |
| 11                                           | 205     | RNA catabolic process                              |                  |                   |           |                    |           |                   |          |
| GO:0019058                                   |         | 2.03115432450918e-15                               | 78.95            | 0.31970105875026  |           |                    | 11        | 231               |          |
|                                              |         | viral infectious cycle                             |                  |                   |           |                    |           |                   |          |
| GO:0022415                                   |         | 7.53863094679851e-15                               | 69.6126729138777 |                   |           |                    |           | 0.359836689502457 |          |
| 11                                           | 260     | viral reproductive process                         |                  |                   |           |                    |           |                   |          |
| GO:0071845                                   |         | 1.99989030693318e-14                               | 63.3854293854294 |                   |           |                    |           | 0.393052383918068 |          |
| 11                                           | 284     | cellular component disassembly at cellular level   |                  |                   |           |                    |           |                   |          |
| GO:0022411                                   |         | 2.33351167860072e-14                               | 62.4524669073406 |                   |           |                    |           | 0.398588332987337 |          |
| 11                                           | 288     | cellular component disassembly                     |                  |                   |           |                    |           |                   |          |
| GO:0016032                                   |         | 3.16139853576349e-12                               | 38.8638888888889 |                   |           |                    |           | 0.62417825756003  |          |
| 11                                           | 451     | viral reproduction                                 |                  |                   |           |                    |           |                   |          |
| GO:0033365                                   |         | 5.30029164637227e-12                               | 36.9550264550265 |                   |           |                    |           | 0.654625977441008 |          |
| 11                                           | 473     | protein localization to organelle                  |                  |                   |           |                    |           |                   |          |
| GO:0006605                                   |         | 5.423028319588e-12                                 | 36.8725701943845 |                   |           |                    |           | 0.656009964708325 |          |
| 11                                           | 474     | protein targeting                                  |                  |                   |           |                    |           |                   |          |
| Tissue: Lung=>Artery_Tibial Type: asymmetric |         |                                                    |                  |                   |           |                    |           |                   |          |
| SourceGene: AGAP11(ENSG00000151303.10)       |         |                                                    |                  |                   |           |                    |           |                   |          |
| TargetGeneSet:                               |         |                                                    |                  |                   |           |                    |           |                   |          |
| S100A6                                       | S100A2  | LINC00467                                          | MIA3             | ACPI              | KIDINS220 | KIF3C              | MTA3      |                   |          |
| DCTN1                                        | GCFC2   | RNF181                                             | COX5B            | FAM134A           | INHA      | GIGYF2             | SETD2     | CSPG5             | IP6K1    |
| WDR82                                        | STAG1   | PPP1R2                                             | BOD1L            | RFC1              | WDFY3     | WDFY3-AS1          |           | NDUFC1            | NIPBL    |
| MAN2A1                                       | YTHDC2  | EHMT2                                              | DAXX             | BRPF3             | KIAA0240  | PHF3               |           | ARID1B            | IGF2R    |
| PHF14                                        | SEPT7P2 | BAZ1B                                              | TMEM168          | ARF5              | CPA1      | AGK                | WHSC1L1   | CHCHD7            | UBR5     |
| SLC45A4                                      | MPDZ    | DENND1A                                            | MIR181A2HG       |                   | STXBP1    | CALM2P2            | C10orf131 |                   | FAM204A  |
| STIM1                                        | PRKCDBP | SBF2                                               | ZDHHC5           | INCENP            | RSF1      | DYNC2H1            | MLL       | ERC1              | GOLT1B   |
| LRRK2                                        | PFKM    | ATF7                                               | CTDSP2           | VSIG10            | PDS5B     | MED4               | RP3       | HERC2             | SMAD3    |
| DNM1P46                                      | FAM173A | CREBBP                                             | KIAA0430         |                   | CTCF      | GLG1               | GCSH      | MBTPS1            | RPS4XP17 |
| ZBTB4                                        | LSMD1   | C17orf39                                           | THRA             |                   | WIPF2     | STAT5B             | NMT1      | USP32             | BPTF     |
| ATP8B1                                       | CTB     | SAMD4B                                             | ARHGAP35         |                   | MAVS      | RP1                | NCOA6     | CEP250            | SOGA1    |
| SYS1                                         | STAU1   | ATP9A                                              | ATP5E            | CTD               | MORC2     | LGALS1             | EP300     | TCF20             | PPEF1    |
| SMC1A                                        | EIF4BP7 | BCORL1                                             | RAP2C            |                   |           |                    |           |                   | TFE3     |
| GOBPID                                       | Pvalue  | OddsRatio                                          | ExpCount         | Count             | Size      | Term               |           |                   |          |
| GO:0016568                                   |         | 1.99813512363887e-09                               | 7.46901568108823 |                   |           | 2.78347519202823   |           |                   |          |
| 17                                           | 419     | chromatin modification                             |                  |                   |           |                    |           |                   |          |
| GO:0016570                                   |         | 1.22838361857895e-06                               | 7.30141176470588 |                   |           | 1.73385924849491   |           |                   |          |
| 11                                           | 261     | histone modification                               |                  |                   |           |                    |           |                   |          |
| GO:0016569                                   |         | 1.53408747062912e-06                               | 7.12725183823529 |                   |           | 1.77371808179365   |           |                   |          |
| 11                                           | 267     | covalent chromatin modification                    |                  |                   |           |                    |           |                   |          |
| GO:0016571                                   |         | 2.48991183776502e-06                               | 17.9899371069182 |                   |           | 0.391945194104214  |           |                   |          |
| 6                                            | 59      | histone methylation                                |                  |                   |           |                    |           |                   |          |
| GO:0048096                                   |         | 5.60074418648522e-06                               | 154.322580645161 |                   |           | 0.0398588332987337 |           |                   |          |
| 3                                            | 6       | chromatin-mediated maintenance of transcription    |                  |                   |           |                    |           |                   |          |
| GO:0006479                                   |         | 1.19020364805122e-05                               | 13.41220657277   | 0.511521694000415 |           |                    |           | 6                 |          |
| 77                                           | protein | methylation                                        |                  |                   |           |                    |           |                   |          |
| GO:0008213                                   |         | 1.19020364805122e-05                               | 13.41220657277   | 0.511521694000415 |           |                    |           | 6                 |          |
| 77                                           | protein | alkylation                                         |                  |                   |           |                    |           |                   |          |
| GO:0034968                                   |         | 1.4328298882083e-05                                | 18.7244897959184 |                   |           | 0.312227527506747  |           |                   |          |

Stable4\_20PerPair

| 5                           | 47                              | histone lysine methylation                     |                   |           |          |                   |          |          |           |      |  |
|-----------------------------|---------------------------------|------------------------------------------------|-------------------|-----------|----------|-------------------|----------|----------|-----------|------|--|
| Tissue: Artery_Tibial=>Lung |                                 |                                                | Type: cluster     |           |          |                   |          |          |           |      |  |
| SourceGene:                 | CKS1BP7(ENSG00000254331.1)      |                                                |                   |           |          |                   |          |          |           |      |  |
| TargetGeneSet:              | NADK                            | PIK3CD                                         | ZDHHC18           | WDC1      | RP11     | HAX1              | MNDA     | CEP350   |           |      |  |
| RGS18                       | PRKD3                           | RMND5A                                         | IL1R2             | GCC2      | SPOPL    | CXCR2             | CXCR1    | LTF      | NICN1-AS1 |      |  |
| PRKCD                       | ACOX2                           | EIF4E3                                         | ABTB1             | TLR1      | KLHL8    | TLR2              | IRF2     | FYB      | PDF       |      |  |
| CYFIP2                      | DOCK2                           | E2F3                                           | FAM65B            | GPSM3     | VNN2     | ARID1B            | RPS6KA2  | SNX13    | TRGJP2    |      |  |
| RPL13AP17                   |                                 | TSC22D4                                        | HIPK2             | TNFRSF10C |          | KAT6A             | SGK196   | UBXN2B   | NECAB1    |      |  |
| RAD21                       | ZCCHC6                          | SEMA4D                                         | TRIM14            | TNFSF8    | TSPAN14  | NAALAD2           | SORL1    | C3AR1    | CLEC4D    |      |  |
| CLEC4E                      | TAS2R30                         | PLXNC1                                         | SLC9A7P1          |           | APAF1    | GLT1D1            | ULK1     | BAZ1A    | TECPR2    | AQP9 |  |
| MEFV                        | UBN1                            | PRKCB                                          | XPO6              | C16orf54  |          | COR01A            | ZNF267   | CNOT1    | ARRB2     |      |  |
| PIK3R5                      | TRIM16                          | FMNL1                                          | IL27RA            | EMR2      | MAST3    | KLK5              | ZNF765   | FCAR     | RNF24     |      |  |
| OSBPL2                      | IL17RA                          | CYTH4                                          | SH3BP1            | NFAM1     | NUP50    | TLR8              | CXorf38  |          |           |      |  |
| GOBPID                      | Pvalue                          | OddsRatio                                      | ExpCount          | Count     | Size     | Term              |          |          |           |      |  |
| GO:0001816                  | 9.01575364855086e-08            | 7.80769890996481                               |                   |           |          | 2.022697391184    | 13       |          |           |      |  |
| 395                         | cytokine production             |                                                |                   |           |          |                   |          |          |           |      |  |
| GO:0001817                  | 1.96600952919472e-06            | 7.03881590950556                               |                   |           |          | 1.83835028717736  |          |          |           |      |  |
| 11                          | 359                             | regulation of cytokine production              |                   |           |          |                   |          |          |           |      |  |
| GO:0050778                  | 2.24798288077245e-06            | 6.93664283465983                               |                   |           |          | 1.86395405162273  |          |          |           |      |  |
| 11                          | 364                             | positive regulation of immune response         |                   |           |          |                   |          |          |           |      |  |
| GO:0002757                  | 3.00931514065176e-06            | 8.66977535738598                               |                   |           |          | 1.20337692893225  |          |          |           |      |  |
| 9                           | 235                             | immune response-activating signal transduction |                   |           |          |                   |          |          |           |      |  |
| GO:0002764                  | 4.67177874673838e-06            | 8.19066623752816                               |                   |           |          | 1.26994671649021  |          |          |           |      |  |
| 9                           | 248                             | immune response-regulating signaling pathway   |                   |           |          |                   |          |          |           |      |  |
| GO:0060326                  | 5.96165913046696e-06            | 11.5395117436075                               |                   |           |          | 0.696422392913985 |          |          |           |      |  |
| 7                           | 136                             | cell chemotaxis                                |                   |           |          |                   |          |          |           |      |  |
| GO:0042113                  | 1.29158075474608e-05            | 10.183704763852                                | 0.783475192028233 |           |          |                   | 7        |          |           |      |  |
| 153                         | B cell activation               |                                                |                   |           |          |                   |          |          |           |      |  |
| GO:0050853                  | 1.36553311380717e-05            | 32.8045714285714                               |                   |           |          | 0.148501833783129 |          |          |           |      |  |
| 4                           | 29                              | B cell receptor signaling pathway              |                   |           |          |                   |          |          |           |      |  |
| Tissue: Lung=>Artery_Tibial |                                 |                                                | Type: asymmetric  |           |          |                   |          |          |           |      |  |
| SourceGene:                 | CTD-253709.1(ENSG00000254787.1) |                                                |                   |           |          |                   |          |          |           |      |  |
| TargetGeneSet:              | SDF4                            | GLTPD1                                         | KLHL21            | UBE4B     | CASP9    | OTUD3             | GPATCH3  | WDC1     | RP11      |      |  |
| WASF2                       | PTAFR                           | COL16A1                                        | MTMR9LP           | AK2       | TMEM53   | CYP4B1            | CDKN2C   | JUN      | DBT       |      |  |
| SORT1                       | TSPAN2                          | PEX11B                                         | FAM63A            | C1orf56   | S100A10  | ZBTB7B            | LMNA     | RRNAD1   | CCDC19    | RXRG |  |
| PRRX1                       | FMO2                            | PTGS2                                          | LMOD1             | ADIPOR1   | ETNK2    | TRIM11            | RYR2     | VSNL1    | PPP1CB    |      |  |
| PPM1B                       | ATOH8                           | RMND5A                                         | CLASP1            | TNFAIP6   | CACNB4   | GPR155            | KANSL1L  | ACADL    | CNPPD1    |      |  |
| ATG9A                       | IRS1                            | GPC1                                           | RNPEPL1           | JAGN1     | SLC25A38 |                   | SLC26A6  | GPX1     | IP6K1     |      |  |
| TEX264                      | SEMA5B                          | ALDH1L1                                        | ALDH1L1-AS2       | KLF15     | ZXDC     | PPM1L             | EGFEM1P  | NAALADL2 |           |      |  |
| MCCC1                       | ABCF3                           | SNORA81                                        | BDH1              | FAM53A    | WDR1     | CD38              | TAPT1    | CXCL1    | CXCL2     | ADH5 |  |
| ADH4                        | ADH1A                           | ADAMTS16                                       |                   | C1QTNF3   | PTGER4   | JMY               | SSBP2    | PDLIM4   | IRF1      |      |  |
| PHF15                       | KDM3B                           | PPP2R2B                                        | DPYSL3            | GPX3      | CTB      | FGF18             | TUBB     | RP3      | CDYL      |      |  |
| PAK1IP1                     | GFOD1                           | LRRC16A                                        | HIST1H1C          |           | DHX16    | FKBPL             | PRRT1    | B3GALT4  | CCND3     | UBR2 |  |
| KLHDC3                      | CDC5L                           | MUT                                            | PGM3              | CNR1      | STXBP2   | SESN1             | CDK19    | LAMA2    | EPB41L2   |      |  |
| KATNA1                      | SYNJ2                           | RPS6KA2                                        | WIPI2             | BZW2      | IL6      | HOXA6             | CREB5    | AQP1     | PHKG1     | ADSL |  |
| WBSR16                      | HIP1                            | FGL2                                           | HGF               | ZNF789    | C7orf58  | HILPDA            | FAM180A  | ZNF282   | ZNF212    |      |  |
| DDHD2                       | PPAPDC1B                        |                                                | FGFR1             | SLC05A1   | GRIP1    | PVT1              | DENND3   | ZC3H3    | CYHR1     |      |  |
| SLC35D2                     | MSANTD3                         | ZDHHC12                                        | ZER1              | TBC1D13   | PHYHD1   | ASB13             | ITIH5    | DHTKD1   | CAMK1D    | OLAH |  |
| ARL5B                       | PRTFDC1                         | KIAA1279                                       |                   | EIF4EBP2  |          | ASCC1             | DNAJB12  | P4HA1    | PLAU      |      |  |
| FRAT1                       | ANKRD2                          | HOGA1                                          | POLL              | DUSP5     | SMC3     | SHOC2             | TALD01   | TOLLIP   | RRM1      | CD44 |  |
| RP1                         | PRDM11                          | PEX16                                          | AMBRA1            | ARFGAP2   | TNKS1BP1 |                   | SLC43A1  | ZBTB3    | TAF6L     |      |  |
| RAB1B                       | POLDIP2                         | CDK2AP2                                        | SNORD5            | VPS11     | C2CD2L   | CD9               | H2AFJ    | FGD4     | METTL7A   |      |  |
| TENC1                       | ELK3                            | TXNRD1                                         | RAB35             | PITPNM2   | PXMP2    | ELF1              | FBXL3    | ERCC5    | IRS2      |      |  |
| C14orf93                    |                                 | SLC7A8                                         | PCK2              | ARID4A    | RHOJ     | GALNTL1           | ZFYVE1   | ALDH6A1  | DLST      |      |  |
| TGFB3                       | DIO2                            | BAHD1                                          | GCHFR             | KBTBD13   | STRA6    | ANKRD34C          |          | PEX11A   | CHSY1     |      |  |
| MSRB1                       | FAM100A                         | CDIPT                                          | RBL2              | PDP2      | C16orf70 |                   | MLYCD    | CHMP1A   | FAM57A    |      |  |
| INPP5K                      | WDR81                           | KIF1C                                          | TMEM102           | SNORA48   | FXR2     | ALOX15B           | C17orf59 |          | ABHD15    | BLMH |  |
| CCL2                        | ERBB2                           | CSF3                                           | THRA              | GHDC      | NMT1     | KANSL1            | CALCOCO2 |          | PKD2      | VMP1 |  |
| PSMC5                       | SMARCD2                         | TEX2                                           | SLC39A11          |           | GPRC5C   | ACOX1             | SPHK1    | CBX4     | PCYT2     |      |  |
| SIRT7                       | DCXR                            | C17orf101                                      |                   | HEXDC     | APCDD1   | C18orf8           | VPS4B    | PIAS4    | UBXN6     |      |  |
| RANBP3                      | ACSBG2                          | KLPP                                           | INSR              | MCOLN1    | MAP2K7   | SLC44A2           | TMED1    | ZNF490   | WDR83     | GCDH |  |
| ABHD8                       | MAP1S                           | KLHL26                                         | NFKBIB            | SHKBP1    | RABAC1   | PPP1R37           | FBXO46   | SIX5     | HIF3A     |      |  |
| SPHK2                       | BCAT2                           | SCAF1                                          | AP2A1             | MED25     | TBC1D17  | SIGLEC16          |          | SIGLEC10 |           | EPN1 |  |



Stable4\_20PerPair

| GO:ID                                       | Pvalue               | OddsRatio | ExpCount         | Count    | Size     | Term                                  |          |          |         |      |  |
|---------------------------------------------|----------------------|-----------|------------------|----------|----------|---------------------------------------|----------|----------|---------|------|--|
| GO:0044282                                  | 2.06735142438574e-10 |           | 6.15278111244498 |          |          | 4.17867275621064                      |          |          |         |      |  |
| 22                                          | 218                  |           |                  |          |          | small molecule catabolic process      |          |          |         |      |  |
| GO:0016054                                  | 1.85992761282614e-08 |           | 5.79398786541644 |          |          | 3.56528959933569                      |          |          |         |      |  |
| 18                                          | 186                  |           |                  |          |          | organic acid catabolic process        |          |          |         |      |  |
| GO:0046395                                  | 1.85992761282614e-08 |           | 5.79398786541644 |          |          | 3.56528959933569                      |          |          |         |      |  |
| 18                                          | 186                  |           |                  |          |          | carboxylic acid catabolic process     |          |          |         |      |  |
| GO:0030258                                  | 1.45692307301709e-07 |           | 6.09038861901457 |          |          | 2.81772887689433                      |          |          |         |      |  |
| 15                                          | 147                  |           |                  |          |          | lipid modification                    |          |          |         |      |  |
| GO:0072329                                  | 2.99830484500555e-07 |           | 8.57839451570102 |          |          | 1.51428966853505                      |          |          |         |      |  |
| 11                                          | 79                   |           |                  |          |          | monocarboxylic acid catabolic process |          |          |         |      |  |
| GO:0019395                                  | 8.11356084996354e-07 |           | 7.67105263157895 |          |          | 1.66763545775379                      |          |          |         |      |  |
| 11                                          | 87                   |           |                  |          |          | fatty acid oxidation                  |          |          |         |      |  |
| GO:0006635                                  | 1.05650632978825e-06 |           | 10.0939187043506 |          |          | 1.07342052453117                      |          |          |         |      |  |
| 9                                           | 56                   |           |                  |          |          | fatty acid beta-oxidation             |          |          |         |      |  |
| GO:0034440                                  | 1.14562991314059e-06 |           | 7.37817645379271 |          |          | 1.72514012871082                      |          |          |         |      |  |
| 11                                          | 90                   |           |                  |          |          | lipid oxidation                       |          |          |         |      |  |
| GO:0032787                                  | 2.95377075405425e-06 |           | 3.30487855684706 |          |          | 7.6864576845893 23                    |          |          |         |      |  |
| 401                                         |                      |           |                  |          |          | monocarboxylic acid metabolic process |          |          |         |      |  |
| GO:0009062                                  | 5.62208561143766e-06 |           | 8.03408803440425 |          |          | 1.30343920835928                      |          |          |         |      |  |
| 9                                           | 68                   |           |                  |          |          | fatty acid catabolic process          |          |          |         |      |  |
| Tissue: Lung=>Artery_Tibial Type: cluster   |                      |           |                  |          |          |                                       |          |          |         |      |  |
| SourceGene: CTD-253709.1(ENSG00000254787.1) |                      |           |                  |          |          |                                       |          |          |         |      |  |
| TargetGeneSet:                              |                      |           |                  |          |          |                                       |          |          |         |      |  |
| WASF2                                       | PTAFR                | COL16A1   | MTMR9LP          | AK2      | TMEM53   | CYP4B1                                | CDKN2C   | JUN      | DBT     |      |  |
| SORT1                                       | TSPAN2               | PEX11B    | FAM63A           | C1orf56  | S100A10  | ZBTB7B                                | LMNA     | RRNAD1   | CCDC19  | RXRG |  |
| PRRX1                                       | FMO2                 | PTGS2     | LMOD1            | ADIPOR1  | ETNK2    | TRIM11                                | RYR2     | VSNL1    | PPP1CB  |      |  |
| PPM1B                                       | ATOH8                | RMND5A    | CLASP1           | TNFAIP6  | CACNB4   | GPR155                                | KANSL1L  | ACADL    | CNPPD1  |      |  |
| ATG9A                                       | IRS1                 | GPC1      | RNPEPL1          | JAGN1    | SLC25A38 |                                       | SLC26A6  | GPX1     | IP6K1   |      |  |
| TEX264                                      | SEMA5B               | ALDH1L1   | ALDH1L1-AS2      | KLF15    | ZXDC     | PPM1L                                 | EGFEM1P  | NAALADL2 |         |      |  |
| MCCC1                                       | ABCF3                | SNORA81   | BDH1             | FAM53A   | WDR1     | CD38                                  | TAPT1    | CXCL1    | CXCL2   | ADH5 |  |
| ADH4                                        | ADH1A                | ADAMTS16  |                  | C1QTNF3  | PTGER4   | JMY                                   | SSBP2    | PDLIM4   | IRF1    |      |  |
| PHF15                                       | KDM3B                | PPP2R2B   | DPYSL3           | GPX3     | CTB      | FGF18                                 | TUBB     | RP3      | CDYL    |      |  |
| PAK1IP1                                     | GFOD1                | LRRCL16A  | HIST1H1C         |          | DHX16    | FKBPL                                 | PRRT1    | B3GALT4  | CNND3   | UBR2 |  |
| KLHDC3                                      | CDC5L                | MUT       | PGM3             | CNR1     | STXBP2   | SESN1                                 | CDK19    | LAMA2    | EPB41L2 |      |  |
| KATNA1                                      | SYNJ2                | RPS6KA2   | WIPI2            | BZW2     | IL6      | HOXA6                                 | CREB5    | AQP1     | PHKG1   | ADSL |  |
| WBSCR16                                     | HIP1                 | FGL2      | HGF              | ZNF789   | C7orf58  | HILPDA                                | FAM180A  | ZNF282   | ZNF212  |      |  |
| DDHD2                                       | PPAPDC1B             |           | FGFR1            | SLC05A1  | GRIP1    | PVT1                                  | DENND3   | ZC3H3    | CYHR1   |      |  |
| SLC35D2                                     | MSANTD3              | ZDHH12    | ZER1             | TBC1D13  | PHYHD1   | ASB13                                 | ITIH5    | DHTKD1   | CAMK1D  | OLAH |  |
| ARL5B                                       | PRTFDC1              | KIAA1279  |                  | EUF4EBP2 |          | ASCC1                                 | DNAJB12  | P4HA1    | PLAU    |      |  |
| FRAT1                                       | ANKRD2               | HOGA1     | POLL             | D15P5    | SMC3     | SHOC2                                 | TALD01   | TOLLIP   | RRM1    | CD44 |  |
| RP1                                         | PRDM11               | PEX16     | AMBRA1           | ARFGAP2  | TNKS1BP1 |                                       | SLC43A1  | ZBTB3    | TAF6L   |      |  |
| RAB1B                                       | POLDIP2              | CDK2AP2   | SNORD5           | VPS11    | C2CD2L   | CD9                                   | H2AFJ    | FGD4     | METTL7A |      |  |
| TENC1                                       | ELK3                 | TXNRD1    | RAB35            | PITPNM2  | PXMP2    | ELF1                                  | FBXL3    | ERCC5    | IRS2    |      |  |
| C14orf93                                    |                      | SLC7A8    | PCK2             | ARID4A   | RHOJ     | GALNTL1                               | ZFYVE1   | ALDH6A1  | DLST    |      |  |
| TGFB3                                       | DIO2                 | BAHD1     | GCHFR            | KBTBD13  | STRA6    | ANKRD34C                              |          | PEX11A   | CHSY1   |      |  |
| MSRB1                                       | FAM100A              | CDIPT     | RBL2             | PDP2     | C16orf70 |                                       | MLYCD    | CHMP1A   | FAM57A  |      |  |
| INPP5K                                      | WDR81                | KIF1C     | TMEM102          | SNORA48  | FXR2     | ALOX15B                               | C17orf59 |          | ABHD15  | BLMH |  |
| CCL2                                        | ERBB2                | CSF3      | THRA             | GHDC     | NMT1     | KANSL1                                | CALCOCO2 |          | PKD2    | VMP1 |  |
| PSMC5                                       | SMARCD2              | TEX2      | SLC39A11         |          | GPRC5C   | ACOX1                                 | SPHK1    | CBX4     | PCYT2   |      |  |
| SIRT7                                       | DCXR                 | C17orf101 |                  | HEXDC    | APCDD1   | C18orf8                               | VPS4B    | PIAS4    | UBXN6   |      |  |
| RANBP3                                      | ACSBG2               | CLPP      | INSR             | MCOLN1   | MAP2K7   | SLC44A2                               | TMED1    | ZNF490   | WDR83   | GCDH |  |
| ABHD8                                       | MAP1S                | KLHL26    | NFKBIB           | SHKBP1   | RABAC1   | PPP1R37                               | FBX046   | SIX5     | HIF3A   |      |  |
| SPHK2                                       | BCAT2                | SCAF1     | AP2A1            | MED25    | TBC1D17  | SIGLEC16                              |          | SIGLEC10 |         | EPN1 |  |
| FKBP1A                                      | MAVS                 | MACROD2   | CRNKL1           | ACSS2    | ZHX3     | SERINC3                               | ACOT8    | LSM14B   | STMN3   |      |  |
| RCAN1                                       | SLC25A18             |           | PRODH            | CLTCL1   | YPEL1    | GGT5                                  | ZNRF3    | MCM5     | TST     | MPST |  |
| SUN2                                        | CBX6                 | SNORD83B  |                  | TAB1     | PMM1     | TTC38                                 | ZBED1    | GPX1P1   | REPS2   | MAOA |  |
| MIR221                                      | ARAF                 | WDR13     | VSIG4            | TCEAL4   | TCEAL3   | TMEM164                               | ABCD1    |          |         |      |  |
| GOBPID                                      | Pvalue               | OddsRatio | ExpCount         | Count    | Size     | Term                                  |          |          |         |      |  |

Stable4\_20PerPair

|                                              |                      |                                                        |                   |
|----------------------------------------------|----------------------|--------------------------------------------------------|-------------------|
| GO:0044282                                   | 2.06735142438574e-10 | 6.15278111244498                                       | 4.17867275621064  |
| 22                                           | 218                  | small molecule catabolic process                       |                   |
| GO:0016054                                   | 1.85992761282614e-08 | 5.79398786541644                                       | 3.56528959933569  |
| 18                                           | 186                  | organic acid catabolic process                         |                   |
| GO:0046395                                   | 1.85992761282614e-08 | 5.79398786541644                                       | 3.56528959933569  |
| 18                                           | 186                  | carboxylic acid catabolic process                      |                   |
| GO:0030258                                   | 1.45692307301709e-07 | 6.09038861901457                                       | 2.81772887689433  |
| 15                                           | 147                  | lipid modification                                     |                   |
| GO:0072329                                   | 2.99830484500555e-07 | 8.57839451570102                                       | 1.51428966853505  |
| 11                                           | 79                   | monocarboxylic acid catabolic process                  |                   |
| GO:0019395                                   | 8.11356084996354e-07 | 7.67105263157895                                       | 1.66763545775379  |
| 11                                           | 87                   | fatty acid oxidation                                   |                   |
| GO:0006635                                   | 1.05650632978825e-06 | 10.0939187043506                                       | 1.07342052453117  |
| 9                                            | 56                   | fatty acid beta-oxidation                              |                   |
| GO:0034440                                   | 1.14562991314059e-06 | 7.37817645379271                                       | 1.72514012871082  |
| 11                                           | 90                   | lipid oxidation                                        |                   |
| GO:0032787                                   | 2.95377075405425e-06 | 3.30487855684706                                       | 7.6864576845893   |
| 401                                          |                      | monocarboxylic acid metabolic process                  | 23                |
| GO:0009062                                   | 5.62208561143766e-06 | 8.03408803440425                                       | 1.30343920835928  |
| 9                                            | 68                   | fatty acid catabolic process                           |                   |
| Tissue: Lung=>Artery_Tibial Type: asymmetric |                      |                                                        |                   |
| SourceGene: E2F3(ENSG00000112242.9)          |                      |                                                        |                   |
| TargetGeneSet:                               | UQCRH                | DNTTIP2                                                | BCAS2             |
| HS1BP3-IT1                                   | C2orf28              | COX5B                                                  | NDUFB4            |
| NDUFC1                                       | WWC2                 | CTD                                                    | COX7C             |
| MRPL2                                        | PSMB1                | NDUFA4                                                 | MALSU1            |
| KIAA0913                                     |                      | NAV2-AS2                                               | NDUFA12           |
| ZNF609                                       | NDE1                 | SLC12A4                                                | MINK1             |
| TBC1D20                                      | SNRPB2               | LPIN3                                                  | ATP5J             |
| GOBPID                                       | Pvalue               | OddsRatio                                              | ExpCount          |
| GO:0022904                                   | 4.56552515661742e-18 | 62.2981927710843                                       | Count             |
| 13                                           | 96                   | respiratory electron transport chain                   | Size              |
| GO:0022900                                   | 4.09336789036212e-16 | 42.6200642791552                                       | Term              |
| 13                                           | 134                  | electron transport chain                               |                   |
| GO:0045333                                   | 8.84150635104301e-16 | 39.9545650301464                                       |                   |
| 13                                           | 142                  | cellular respiration                                   |                   |
| GO:0015980                                   | 1.84344044969469e-11 | 17.3284202569917                                       |                   |
| 13                                           | 307                  | energy derivation by oxidation of organic compounds    |                   |
| GO:0006091                                   | 1.1205995440234e-09  | 12.170749665328                                        | 1.45124904850875  |
| 428                                          |                      | generation of precursor metabolites and energy         | 13                |
| GO:0042773                                   | 1.07011493057609e-08 | 48.874645490641                                        | 0.159366133831569 |
| 47                                           |                      | ATP synthesis coupled electron transport               | 6                 |
| GO:0042775                                   | 1.07011493057609e-08 | 48.874645490641                                        | 0.159366133831569 |
| 47                                           |                      | mitochondrial ATP synthesis coupled electron transport | 6                 |
| GO:0006119                                   | 3.92198943479283e-08 | 38.5062611806798                                       | 0.196664590685766 |
| 6                                            | 58                   | oxidative phosphorylation                              |                   |
| GO:0006120                                   | 1.26601969064591e-07 | 52.6796187683284                                       | 0.122067676977372 |
| 5                                            | 36                   | mitochondrial electron transport, NADH to ubiquinone   |                   |
| Tissue: Lung=>Artery_Tibial Type: cluster    |                      |                                                        |                   |
| SourceGene: FBXO18(ENSG00000134452.12)       |                      |                                                        |                   |
| TargetGeneSet:                               | MECR                 | ZCCHC17                                                | KHDRBS1           |
| ALG14                                        | RP4                  | SRGAP2P1                                               | SRGAP2P2          |
| MYOC                                         | KLHDC8A              | SLC41A1                                                | SRGAP3            |
| SFXN5                                        | RNF181               | COX5B                                                  | CHCHD5            |
| SPCS1                                        | CLCP1                | BBX                                                    | CLDN18            |
| CTD                                          | ARHGAP26             |                                                        | RPS14             |
| RP3                                          | COX6A1P2             |                                                        | MRPL2             |
| SF3B5                                        | PSMB1                | ANKMY2                                                 | MALSU1            |
| CHCHD7                                       | COX6C                | UTP23                                                  | NDUFB9            |
| FAM208B                                      | FBXO18               | CALM2P2                                                | NHP2P1            |
| PLCB3                                        | PPP2R5B              | FAU                                                    | SIPA1             |
| GALNT8                                       | GPD1                 | ATP5G2                                                 | RBMS2             |
| MED13L                                       | RPS11P5              | SAP18                                                  | PDS5B             |
|                                              |                      |                                                        | WDFY2             |
|                                              |                      |                                                        | OR11H7            |
|                                              |                      |                                                        | RPS29             |
|                                              |                      |                                                        | SLIRP             |
|                                              |                      |                                                        | U6                |
|                                              |                      |                                                        | RCOR1             |
|                                              |                      |                                                        | MECR              |
|                                              |                      |                                                        | ZCCHC17           |
|                                              |                      |                                                        | KHDRBS1           |
|                                              |                      |                                                        | PSMB2             |
|                                              |                      |                                                        | OSCP1             |
|                                              |                      |                                                        | RPS8              |
|                                              |                      |                                                        | RP1               |
|                                              |                      |                                                        | RP11              |
|                                              |                      |                                                        | MRPS21            |
|                                              |                      |                                                        | SCNM1             |
|                                              |                      |                                                        | PSMB4             |
|                                              |                      |                                                        | DENND4B           |
|                                              |                      |                                                        | PMF1              |
|                                              |                      |                                                        | TATDN3            |
|                                              |                      |                                                        | KLHL29            |
|                                              |                      |                                                        | C2orf28           |
|                                              |                      |                                                        | RPLP0P6           |
|                                              |                      |                                                        | LSM3              |
|                                              |                      |                                                        | KRBOX1            |
|                                              |                      |                                                        | ZNF852            |
|                                              |                      |                                                        | KIF9              |
|                                              |                      |                                                        | WDR6              |
|                                              |                      |                                                        | OCIAD1-AS1        |
|                                              |                      |                                                        | MRPL1             |
|                                              |                      |                                                        | LARP7             |
|                                              |                      |                                                        | WWC2              |
|                                              |                      |                                                        | TMEM14B           |
|                                              |                      |                                                        | NOL7              |
|                                              |                      |                                                        | HLA-F-AS1         |
|                                              |                      |                                                        | MICD              |
|                                              |                      |                                                        | C6orf57           |
|                                              |                      |                                                        | RPL39P3           |
|                                              |                      |                                                        | IMPG1             |
|                                              |                      |                                                        | MRPS12            |
|                                              |                      |                                                        | PEX7              |
|                                              |                      |                                                        | C7orf61           |
|                                              |                      |                                                        | SSBP1             |
|                                              |                      |                                                        | SLC4A2            |
|                                              |                      |                                                        | AGAP3             |
|                                              |                      |                                                        | KIF13B            |
|                                              |                      |                                                        | DCTN3             |
|                                              |                      |                                                        | FAM205A           |
|                                              |                      |                                                        | RC3H2             |
|                                              |                      |                                                        | FAM129B           |
|                                              |                      |                                                        | FAM204A           |
|                                              |                      |                                                        | RPLP2             |
|                                              |                      |                                                        | CARS              |
|                                              |                      |                                                        | C11orf10          |
|                                              |                      |                                                        | C11orf1           |
|                                              |                      |                                                        | PCSK7             |
|                                              |                      |                                                        | ATP5L             |
|                                              |                      |                                                        | SPA17             |
|                                              |                      |                                                        | SSH1              |
|                                              |                      |                                                        | CHPT1             |
|                                              |                      |                                                        | RPL18AP3          |
|                                              |                      |                                                        | U6                |
|                                              |                      |                                                        | RCOR1             |

Stable4\_20PerPair

| GO:ID      | Pvalue | OddsRatio | ExpCount             | Count            | Size             | Term               |
|------------|--------|-----------|----------------------|------------------|------------------|--------------------|
| GO:0006415 | 13     | 91        | 3.78849351354665e-12 | 18.6784776902887 |                  | 0.881599889281019  |
| GO:0000184 | 14     | 119       | 8.24992733445461e-12 | 15.0328042328042 |                  | 1.15286139367518   |
| GO:0000956 | 15     | 169       | 8.63920865152007e-11 | 11.0314285714286 |                  | 1.63725693723618   |
| GO:0006402 | 15     | 178       | 1.80682231573148e-10 | 10.4157055214724 |                  | 1.72444813507716   |
| GO:0043624 | 14     | 153       | 2.52635066746848e-10 | 11.3285371702638 |                  | 1.48225036329666   |
| GO:0006414 | 105    |           | 3.84141034299822e-10 | 14.3326612903226 |                  | 1.0172306414781 12 |
| GO:0006614 | 105    |           | 3.84141034299822e-10 | 14.3326612903226 |                  | 1.0172306414781 12 |
| GO:0043241 | 14     | 158       | 3.88033221363672e-10 | 10.9313271604938 |                  | 1.53068991765276   |
| GO:0006613 | 12     | 106       | 4.29631560125202e-10 | 14.1791888297872 |                  | 1.02691855234932   |
| GO:0045047 | 12     | 106       | 4.29631560125202e-10 | 14.1791888297872 |                  | 1.02691855234932   |
| GO:0072599 | 12     | 106       | 4.29631560125202e-10 | 14.1791888297872 |                  | 1.02691855234932   |
| GO:0006401 | 205    |           | 1.30736137255254e-09 | 8.91852631578947 |                  | 1.9860217286001 15 |
| GO:0034623 | 14     | 174       | 1.38880095640572e-09 | 9.82708333333333 |                  | 1.68569649159228   |
| GO:0070972 | 12     | 118       | 1.50897771532649e-09 | 12.5633844339623 |                  | 1.14317348280396   |
| GO:0032984 | 14     | 179       | 2.0125567867469e-09  | 9.52592592592593 |                  | 1.73413604594838   |
| GO:0006612 | 13     | 153       | 2.84111606763006e-09 | 10.3612485939258 |                  | 1.48225036329666   |
| GO:0072594 | 14     | 204       | 1.09104705392107e-08 | 8.25789473684211 |                  | 1.97633381772888   |
| GO:0019080 | 12     | 151       | 2.52507886289359e-08 | 9.55845323741007 |                  | 1.46287454155422   |
| GO:0019083 | 12     | 151       | 2.52507886289359e-08 | 9.55845323741007 |                  | 1.46287454155422   |
| GO:0006413 | 12     | 152       | 2.71904693879787e-08 | 9.48950892857143 |                  | 1.47256245242544   |
| GO:0071845 | 15     | 284       | 1.0540381480096e-07  | 6.26408921933086 |                  | 2.75136668742648   |
| GO:0022411 | 15     | 288       | 1.26476224341199e-07 | 6.17054945054945 |                  | 2.79011833091136   |
| GO:0022904 | 9      | 96        | 3.68580792010241e-07 | 11.2324295867334 |                  | 0.930039443637119  |
| GO:0019058 | 231    |           | 3.79386595355862e-07 | 6.6173878494546  | 2.23790741125182 | 13                 |
| GO:0022415 | 260    |           | 1.44555172918941e-06 | 5.82842934106921 |                  | 2.5188568265172 13 |
| GO:0006605 | 17     | 474       | 3.34412438836537e-06 | 4.18989165821636 |                  | 4.59206975295827   |
| GO:0022900 | 9      | 134       | 7.7869643150417e-06  | 7.79688549618321 |                  | 1.29818005674348   |

Stable4\_20PerPair

|                             |                             |                      |                                                                     |
|-----------------------------|-----------------------------|----------------------|---------------------------------------------------------------------|
| GO:0016032                  | 7.60754506047406e-06        | 4.11598071931776     | 4.36924780292021                                                    |
| 16                          | 451                         | viral reproduction   |                                                                     |
| GO:0045333                  | 9.74864465719486e-06        | 7.32376743385181     | 1.37568334371324                                                    |
| 9                           | 142                         | cellular respiration |                                                                     |
| Tissue: Artery_Tibial=>Lung | Type: asymmetric            |                      |                                                                     |
| SourceGene:                 | HOXC-AS5(ENSG00000249641.2) |                      |                                                                     |
| TargetGeneSet:              | RPL22                       | UBR4                 | RPL11                                                               |
| KIAA1522                    | SLC2A1                      | ZCCHC11              | MAGOH                                                               |
| MYEOV2                      | VHL                         | RPL32                | LSM3                                                                |
| ANKRD17                     | RPL34                       | LARP7                | NIPBL                                                               |
| HNRNPC                      | C6orf130                    |                      | RPL24P4                                                             |
| BUD31                       | PMS2P1                      | SSBP1                | PINX1                                                               |
| KIAA1797                    |                             | OR1K1                | NR6A1                                                               |
| RPS25                       | DPAGT1                      | ZCRB1                | PFDN5                                                               |
| MAPKBP1                     | SRRM2                       | GSPT1                | CNOT1                                                               |
| WNT3                        | NPEPPS                      | MED13                | GGA3                                                                |
| MIR98                       | MED12                       | ZMYM3                |                                                                     |
| GOBPID                      | Pvalue                      | OddsRatio            | ExpCount                                                            |
| GO:0000956                  | 17                          | 169                  | 25.2425856307435                                                    |
|                             |                             |                      | nuclear-transcribed mRNA catabolic process                          |
| GO:0006401                  | 18                          | 205                  | 22.0210453682939                                                    |
|                             |                             |                      | RNA catabolic process                                               |
| GO:0006402                  | 17                          | 178                  | 23.8164251207729                                                    |
|                             |                             |                      | mRNA catabolic process                                              |
| GO:0000184                  | 119                         |                      | 28.820202020202                                                     |
|                             |                             |                      | nuclear-transcribed mRNA catabolic process, nonsense-mediated decay |
| GO:0006614                  | 105                         |                      | 30.114698247891                                                     |
|                             |                             |                      | SRP-dependent cotranslational protein targeting to membrane         |
| GO:0006613                  | 13                          | 106                  | 29.7887979457551                                                    |
|                             |                             |                      | cotranslational protein targeting to membrane                       |
| GO:0045047                  | 13                          | 106                  | 29.7887979457551                                                    |
|                             |                             |                      | protein targeting to ER                                             |
| GO:0072599                  | 13                          | 106                  | 29.7887979457551                                                    |
|                             |                             |                      | establishment of protein localization to endoplasmic reticulum      |
| GO:0070972                  | 13                          | 118                  | 26.3621890547264                                                    |
|                             |                             |                      | protein localization to endoplasmic reticulum                       |
| GO:0006415                  | 12                          | 91                   | 31.9255398361876                                                    |
|                             |                             |                      | translational termination                                           |
| GO:0006414                  | 12                          | 105                  | 27.0929791271347                                                    |
|                             |                             |                      | translational elongation                                            |
| GO:0019080                  | 13                          | 151                  | 20.0117888816786                                                    |
|                             |                             |                      | viral genome expression                                             |
| GO:0019083                  | 13                          | 151                  | 20.0117888816786                                                    |
|                             |                             |                      | viral transcription                                                 |
| GO:0006612                  | 13                          | 153                  | 19.7231343283582                                                    |
|                             |                             |                      | protein targeting to membrane                                       |
| GO:0043624                  | 13                          | 153                  | 19.7231343283582                                                    |
|                             |                             |                      | cellular protein complex disassembly                                |
| GO:0043241                  | 13                          | 158                  | 19.0363355635615                                                    |
|                             |                             |                      | protein complex disassembly                                         |
| GO:0072594                  | 14                          | 204                  | 15.8320574162679                                                    |
|                             |                             |                      | establishment of protein localization to organelle                  |
| GO:0034623                  | 174                         |                      | 17.125243348475                                                     |
|                             |                             |                      | cellular macromolecular complex disassembly                         |
| GO:0032984                  | 13                          | 179                  | 16.6035784930768                                                    |
|                             |                             |                      | macromolecular complex disassembly                                  |
| GO:0006413                  | 12                          | 152                  | 17.9382352941176                                                    |
|                             |                             |                      | translational initiation                                            |
| GO:0019058                  | 231                         |                      | 12.59680953033                                                      |
|                             |                             |                      | viral infectious cycle                                              |
| GO:0033365                  | 17                          | 473                  | 8.23430103035366                                                    |
|                             |                             |                      | protein localization to organelle                                   |
| GO:0006605                  |                             |                      | 8.21569240387621                                                    |
|                             |                             |                      | 2.6240398588333                                                     |

STable4\_20PerPair

|                                                                     |                            |                                                                                      |                      |                  |                   |                                                                                                                           |     |  |    |
|---------------------------------------------------------------------|----------------------------|--------------------------------------------------------------------------------------|----------------------|------------------|-------------------|---------------------------------------------------------------------------------------------------------------------------|-----|--|----|
| 474                                                                 | protein targeting          |                                                                                      |                      |                  |                   |                                                                                                                           |     |  |    |
| GO:0022415                                                          | 1.65498000540588e-09       | 11.095051060487                                                                      | 1.43934675800983     |                  |                   |                                                                                                                           |     |  | 13 |
| 260                                                                 | viral reproductive process |                                                                                      |                      |                  |                   |                                                                                                                           |     |  |    |
| GO:0071845                                                          | 4.82115272069261e-09       | 10.0952800572782                                                                     | 1.57220953567227     |                  |                   |                                                                                                                           |     |  |    |
| 13                                                                  | 284                        | cellular component disassembly at cellular level                                     |                      |                  |                   |                                                                                                                           |     |  |    |
| GO:0022411                                                          | 5.70474276916864e-09       | 9.94561736770692                                                                     | 1.59435333194935     |                  |                   |                                                                                                                           |     |  |    |
| 13                                                                  | 288                        | cellular component disassembly                                                       |                      |                  |                   |                                                                                                                           |     |  |    |
| GO:0016032                                                          | 2.12671550358649e-08       | 7.37561750176429                                                                     | 2.49671303024012     |                  |                   |                                                                                                                           |     |  |    |
| 15                                                                  | 451                        | viral reproduction                                                                   |                      |                  |                   |                                                                                                                           |     |  |    |
| GO:0008380                                                          | 1.11510363562749e-05       | 6.41624828845276                                                                     | 1.78811154937375     |                  |                   |                                                                                                                           |     |  |    |
| 10                                                                  | 323                        | RNA splicing                                                                         |                      |                  |                   |                                                                                                                           |     |  |    |
| GO:0006397                                                          | 1.17302553785348e-05       | 5.74529359031824                                                                     | 2.20884367863816     |                  |                   |                                                                                                                           |     |  |    |
| 11                                                                  | 399                        | mRNA processing                                                                      |                      |                  |                   |                                                                                                                           |     |  |    |
| GO:0000377                                                          | 1.66882052411206e-05       | 8.03571428571429                                                                     | 1.12933361013079     |                  |                   |                                                                                                                           |     |  |    |
| 8                                                                   | 204                        | RNA splicing, via transesterification reactions with bulged adenosine as nucleophile |                      |                  |                   |                                                                                                                           |     |  |    |
| GO:0000398                                                          | 1.66882052411206e-05       | 8.03571428571429                                                                     | 1.12933361013079     |                  |                   |                                                                                                                           |     |  |    |
| 8                                                                   | 204                        | nuclear mRNA splicing, via spliceosome                                               |                      |                  |                   |                                                                                                                           |     |  |    |
| GO:0000375                                                          | 1.98771484760446e-05       | 7.83305693753455                                                                     | 1.15701335547713     |                  |                   |                                                                                                                           |     |  |    |
| 8                                                                   | 209                        | RNA splicing, via transesterification reactions                                      |                      |                  |                   |                                                                                                                           |     |  |    |
| Tissue: Artery_Tibial=>Lung Type: asymmetric                        |                            |                                                                                      |                      |                  |                   |                                                                                                                           |     |  |    |
| SourceGene: IGHV3-7(ENSG00000211938.2)                              |                            |                                                                                      |                      |                  |                   |                                                                                                                           |     |  |    |
| TargetGeneSet: AMYP1 RP11 IGKJ5 IGKC IGKJ3 IGKJ2 IGKJ1 IGKV4-1      |                            |                                                                                      |                      |                  |                   |                                                                                                                           |     |  |    |
| IGKV1-5 IGKV1-9 IGKV1-12 IGKV3-15 IGKV1-16 IGKV1-17                 |                            |                                                                                      |                      |                  |                   |                                                                                                                           |     |  |    |
| IGKV3-20 IGKV6-21 IGKV1-27 IGKV2-28 IGKV1-33                        |                            |                                                                                      |                      |                  |                   |                                                                                                                           |     |  |    |
| IGKV1D-39 IGKV1D-37 IGKV1D-33 IGKV2D-30 IGKV2D-28                   |                            |                                                                                      |                      |                  |                   |                                                                                                                           |     |  |    |
| IGKV3D-20 HOXD3 TWIST2 CCR10 FYTDD1 LRRC66 IGJ PGRMC2 CTB           |                            |                                                                                      |                      |                  |                   |                                                                                                                           |     |  |    |
| ZNF815 PCP2 MATN2 IGHV6-1 IGHV3-21 IGHV5-51 SPG11 UBE2Q2 TMC5       |                            |                                                                                      |                      |                  |                   |                                                                                                                           |     |  |    |
| CTA SIRT6 TPD52L2 IGLV5-48 IGLV5-45 IGLV1-40 IGLV2-14               |                            |                                                                                      |                      |                  |                   |                                                                                                                           |     |  |    |
| IGLV3-9 IGLC6                                                       |                            |                                                                                      |                      |                  |                   |                                                                                                                           |     |  |    |
| GOBPID                                                              | Pvalue                     | OddsRatio                                                                            | ExpCount             | Count            | Size              | Term                                                                                                                      |     |  |    |
| GO:0006958                                                          | 6                          | 50                                                                                   | 6.56174599161319e-11 | 130.781818181818 |                   | 0.0726593315341499                                                                                                        |     |  |    |
|                                                                     |                            |                                                                                      |                      |                  |                   | complement activation, classical pathway                                                                                  |     |  |    |
| GO:0006956                                                          | 6                          | 63                                                                                   | 2.7733150750002e-10  | 100.863157894737 |                   | 0.0915507577330289                                                                                                        |     |  |    |
|                                                                     |                            |                                                                                      |                      |                  |                   | complement activation                                                                                                     |     |  |    |
| GO:0002455                                                          | 6                          | 65                                                                                   | 3.3654040772284e-10  | 97.4305084745763 |                   | 0.0944571309943949                                                                                                        |     |  |    |
|                                                                     |                            |                                                                                      |                      |                  |                   | humoral immune response mediated by circulating immunoglobulin                                                            |     |  |    |
| GO:0072376                                                          | 6                          | 82                                                                                   | 1.40520274699429e-09 | 75.5473684210526 |                   | 0.119161303716006                                                                                                         |     |  |    |
|                                                                     |                            |                                                                                      |                      |                  |                   | protein activation cascade                                                                                                |     |  |    |
| GO:0016064                                                          | 6                          | 111                                                                                  | 8.85392507192161e-09 | 54.5714285714286 |                   | 0.161303716005813                                                                                                         |     |  |    |
|                                                                     |                            |                                                                                      |                      |                  |                   | immunoglobulin mediated immune response                                                                                   |     |  |    |
| GO:0019724                                                          | 6                          | 114                                                                                  | 1.04006006824943e-08 | 53.0444444444444 |                   | 0.165663275897862                                                                                                         |     |  |    |
|                                                                     |                            |                                                                                      |                      |                  |                   | B cell mediated immunity                                                                                                  |     |  |    |
| GO:0006959                                                          | 6                          | 122                                                                                  | 1.5651210711786e-08  | 49.3586206896552 |                   | 0.177288768943326                                                                                                         |     |  |    |
|                                                                     |                            |                                                                                      |                      |                  |                   | humoral immune response                                                                                                   |     |  |    |
| GO:0002449                                                          | 6                          | 167                                                                                  | 1.02319466325083e-07 | 35.4509316770186 |                   | 0.242682167324061                                                                                                         |     |  |    |
|                                                                     |                            |                                                                                      |                      |                  |                   | lymphocyte mediated immunity                                                                                              |     |  |    |
| GO:0002460                                                          | 6                          | 181                                                                                  | 1.64953366296707e-07 | 32.5828571428571 |                   | 0.263026780153623                                                                                                         |     |  |    |
|                                                                     |                            |                                                                                      |                      |                  |                   | adaptive immune response based on somatic recombination of immune receptors built from immunoglobulin superfamily domains |     |  |    |
| GO:0002250                                                          |                            |                                                                                      | 2.80419069122154e-07 | 29.6625          | 0.287730952875234 | 6                                                                                                                         | 198 |  |    |
|                                                                     |                            |                                                                                      |                      |                  |                   | adaptive immune response                                                                                                  |     |  |    |
| GO:0002443                                                          | 6                          | 211                                                                                  | 4.07855411949053e-07 | 27.7560975609756 |                   | 0.306622379074112                                                                                                         |     |  |    |
|                                                                     |                            |                                                                                      |                      |                  |                   | leukocyte mediated immunity                                                                                               |     |  |    |
| GO:0002253                                                          | 6                          | 299                                                                                  | 3.116569335006e-06   | 19.2996587030717 |                   | 0.434502802574216                                                                                                         |     |  |    |
|                                                                     |                            |                                                                                      |                      |                  |                   | activation of immune response                                                                                             |     |  |    |
| GO:0050778                                                          | 364                        |                                                                                      | 9.65416030917766e-06 | 15.722905027933  | 0.528959933568611 | 6                                                                                                                         |     |  |    |
|                                                                     |                            |                                                                                      |                      |                  |                   | positive regulation of immune response                                                                                    |     |  |    |
| GO:0002252                                                          | 6                          | 386                                                                                  | 1.34902972300728e-05 | 14.7894736842105 |                   | 0.560930039443637                                                                                                         |     |  |    |
|                                                                     |                            |                                                                                      |                      |                  |                   | immune effector process                                                                                                   |     |  |    |
| Tissue: Lung=>Artery_Tibial Type: cluster                           |                            |                                                                                      |                      |                  |                   |                                                                                                                           |     |  |    |
| SourceGene: MALSU1(ENSG00000156928.4)                               |                            |                                                                                      |                      |                  |                   |                                                                                                                           |     |  |    |
| TargetGeneSet: RERE UBE4B SPEN ARID1A WASF2 EYA3 PHACTR4 SRSF4 MECR |                            |                                                                                      |                      |                  |                   |                                                                                                                           |     |  |    |

Stable4\_20PerPair

| GO:ID                                     | Pvalue    | OddsRatio | ExpCount             | Count            | Size             | Term              |          |         |           |      |
|-------------------------------------------|-----------|-----------|----------------------|------------------|------------------|-------------------|----------|---------|-----------|------|
| GO:0045333                                | 14        | 142       | 9.26263010788783e-11 | 12.3116319444444 |                  | 1.37568334371324  |          |         |           |      |
| GO:0015980                                | 18        | 307       | 9.71131285330417e-10 | 7.15854557830847 |                  | 2.97418863746454  |          |         |           |      |
| GO:0022904                                | 11        | 96        | 2.0746907009595e-09  | 14.2714090287278 |                  | 0.930039443637119 |          |         |           |      |
| GO:0006091                                | 20        | 428       | 5.4481847749318e-09  | 5.67933006535948 |                  | 4.14642585288215  |          |         |           |      |
| GO:0022900                                | 11        | 134       | 7.07465700228225e-08 | 9.83601184849058 |                  | 1.29818005674348  |          |         |           |      |
| Tissue: Lung=>Artery_Tibial Type: cluster |           |           |                      |                  |                  |                   |          |         |           |      |
| SourceGene: MED30(ENSG00000164758.3)      |           |           |                      |                  |                  |                   |          |         |           |      |
| TargetGeneSet:                            | MRPL20    | RPL22     | SDHB                 | MECR             | ZCCHC17          | ZBTB80S           | ERI3     | UQCRH   | RP4       |      |
| PSMB4                                     | DPM3      | PMF1      | ACBD6                | NAV1             | SNRPE            | ARV1              | ACP1     | FAM150B | KIDINS220 |      |
| RP11                                      | TET3      | COX5B     | UNC50                | MZT2B            | TANC1            | MOB4              | SLC23A3  | FARSB   | HDLBP     | LSM3 |
| OXSR1                                     | EXOSC7    | USP4      | SPCS1                | CHMP2B           | STAG1            | MRPS22            | ATP11B   | ST6GAL1 | RGS12     |      |
| MRPL1                                     | MRPS18C   | GRID2     | NDUFC1               | WWC2             | SUB1             | BRIX1             | MOCS2    | NDUFAF2 | COX7C     |      |
| RIOK2                                     | MAN2A1    | HINT1     | UQCRQ                | SKP1             | GFRA3            | PDF               | RPS14    | MRPL22  | UBLCP1    | MSX2 |
| TMEM14B                                   | NOL7      | HNRNPC    | SRPK1                | BRPF3            | MEA1             | MRPL2             | C6orf57  | COX7A2  | IMPG1     |      |
| C6orf203                                  |           | RP1       | L3MBTL3              | SF3B5            | ARID1B           | PSMB1             | NDUFA4   | MALSU1  | LSM5      |      |
| YAE1D1                                    | CHCHD2    | STAG3L4   | PMS2P1               | PSMC2            | BRAF             | SSBP1             | CCDC25   | GS1     | VPS13B    |      |
| COX6C                                     | ZNF706    | NDUFB9    | CPSF1                | C8orf33          | GLIS3            | KIAA2026          |          | PLIN2   | NDUFB6    |      |
| DCTN3                                     | INVS      | FAM149B1  |                      | FAM204A          | TPP1             | RPL27A            | C11orf31 |         | ARL2      |      |
| CCDC85B                                   | NDUFS8    | LAMTOR1   | CWC15                | MAML2            | C11orf1          | TMPRSS5           | ATP5L    | ERC1    | ATF7      |      |
| RPS26                                     | RBMS2     | R3HDM2    | C12orf61             |                  | CHST11           | ALKBH2            | MED13L   | COX6A1  | TRAC      | MED4 |
| MBIP                                      | C14orf101 |           | PSMA3                | ERH              | ENTPD5           | SLIRP             | PSMC1    | C14orf2 | CDCA4     |      |
| CYFIP1                                    | NDN       | SRP14     | GALK2                | RPLP1            | MRPL28           | C16orf42          |          | NDE1    | NDUFAB1   |      |
| BCL7C                                     | MIR4519   | NUDT21    | SLC12A4              | GCSH             | TRAPPC2L         |                   | PSMB6    | MINK1   | CCL13     | RFFL |
| PSMB3                                     | SMARCE1   | KRT223P   | COPZ2                | MRPS23           | ICT1             | ATP5H             | NT5C     | TNRC6C  | KIAA1328  |      |
| IER3IP1                                   | ELAC1     | ZNF532    | CFD                  | UQCR11           | MRPL54           | DPP9              | C19orf70 |         | NDUFA11   |      |
| SWSAP1                                    | NDUFB7    | CPAMD8    | NDUFA13              | PDCD2L           | COX6B1           | SIPA1L3           | SNRPA    | ZNF428  | GEMIN7    |      |
| SNRPD2                                    | RPS5      | SNRPB     | SNORA51              | MRPS26           | SNRPB2           | DYNLRB1           | ROMO1    | MYL9    | ATP5E     |      |
| ATP5J                                     | RANBP1    | ZNF280B   | DEPDC5               | TCF20            | RP6              | TIMM17B           | COX7B    | NDUFA1  | VMA21     |      |
| GOBPID                                    | Pvalue    | OddsRatio | ExpCount             | Count            | Size             | Term              |          |         |           |      |
| GO:0022904                                | 24        | 96        | 4.80768187824279e-26 | 33.8452380952381 |                  | 1.08947477683205  |          |         |           |      |
| GO:0022900                                | 134       |           | 2.60589388894084e-22 | 22.094025974026  | 1.52072520932807 |                   |          |         |           | 24   |
| GO:0045333                                | 24        | 142       | 1.10821348634874e-21 | 20.5845036319613 |                  | 1.61151477406408  |          |         |           |      |
| GO:0015980                                | 25        | 307       | 8.88607998440733e-15 | 8.93221592938415 |                  | 3.48404954674417  |          |         |           |      |
| GO:0006091                                |           |           | 2.35233740270025e-12 | 6.50749873819309 |                  | 4.85724171337624  |          |         |           |      |

Stable4\_20PerPair

|            |     |                                                                                                |                                    |
|------------|-----|------------------------------------------------------------------------------------------------|------------------------------------|
| 26         | 428 | generation of precursor metabolites and energy                                                 |                                    |
| GO:0042773 |     | 2.35984507743052e-09                                                                           | 21.7726655348048 0.533388692824026 |
| 9          | 47  | ATP synthesis coupled electron transport                                                       |                                    |
| GO:0042775 |     | 2.35984507743052e-09                                                                           | 21.7726655348048 0.533388692824026 |
| 9          | 47  | mitochondrial ATP synthesis coupled electron transport                                         |                                    |
| GO:0006120 |     | 5.3550209187755e-09                                                                            | 26.1153846153846 0.40855304131202  |
| 8          | 36  | mitochondrial electron transport, NADH to ubiquinone                                           |                                    |
| GO:0006119 |     | 1.65772557638898e-08                                                                           | 16.8718894009217 0.658224344336032 |
| 9          | 58  | oxidative phosphorylation                                                                      |                                    |
| GO:0000377 |     | 8.22136912979041e-08                                                                           | 6.92484210526316 2.31513390076811  |
| 14         | 204 | RNA splicing, via transesterification reactions with bulged adenosine as nucleophile           |                                    |
| GO:0000398 |     | 8.22136912979041e-08                                                                           | 6.92484210526316 2.31513390076811  |
| 14         | 204 | nuclear mRNA splicing, via spliceosome                                                         |                                    |
| GO:0000375 |     | 1.11120510449526e-07                                                                           | 6.744888888888889 2.37187737872812 |
| 14         | 209 | RNA splicing, via transesterification reactions                                                |                                    |
| GO:0008380 |     | 8.29527736929109e-07                                                                           | 4.92296857117704 3.66562867621618  |
| 16         | 323 | RNA splicing                                                                                   |                                    |
| GO:0051437 |     | 1.49815446664285e-06                                                                           | 11.3966346153846 0.81710608262404  |
| 8          | 72  | positive regulation of ubiquitin-protein ligase activity involved in mitotic cell cycle        |                                    |
| GO:0006200 |     | 2.05175450682395e-06                                                                           | 10.8840413318025 0.851152169400042 |
| 8          | 75  | ATP catabolic process                                                                          |                                    |
| GO:0051439 |     | 2.77048720394003e-06                                                                           | 10.4153846153846 0.885198256176043 |
| 8          | 78  | regulation of ubiquitin-protein ligase activity involved in mitotic cell cycle                 |                                    |
| GO:0006521 |     | 3.5003022957087e-06                                                                            | 12.6954140127389 0.646875648744032 |
| 7          | 57  | regulation of cellular amino acid metabolic process                                            |                                    |
| GO:0051443 |     | 4.05273567851081e-06                                                                           | 9.84961884961885 0.930593038544045 |
| 8          | 82  | positive regulation of ubiquitin-protein ligase activity                                       |                                    |
| GO:0031145 |     | 4.44218161283476e-06                                                                           | 9.71760683760684 0.941941734136046 |
| 8          | 83  | anaphase-promoting complex-dependent proteasomal ubiquitin-dependent protein catabolic process |                                    |
| GO:0051351 |     | 5.80616794550596e-06                                                                           | 9.34188034188034 0.975987820912048 |
| 8          | 86  | positive regulation of ligase activity                                                         |                                    |
| GO:0006977 |     | 9.46532592415997e-06                                                                           | 10.7520241822304 0.749013909072037 |
| 7          | 66  | DNA damage response, signal transduction by p53 class mediator resulting in cell cycle arrest  |                                    |
| GO:0072413 |     | 9.46532592415997e-06                                                                           | 10.7520241822304 0.749013909072037 |
| 7          | 66  | signal transduction involved in mitotic cell cycle checkpoint                                  |                                    |
| GO:0072431 |     | 9.46532592415997e-06                                                                           | 10.7520241822304 0.749013909072037 |
| 7          | 66  | signal transduction involved in mitotic cell cycle G1/S transition                             |                                    |
| GO:0072474 |     | 9.46532592415997e-06                                                                           | 10.7520241822304 0.749013909072037 |
| 7          | 66  | signal transduction involved in mitotic cell cycle G1/S checkpoint                             |                                    |
| GO:0046034 |     | 9.56129334288728e-06                                                                           | 7.34879032258065 1.37319216663207  |
| 9          | 121 | ATP metabolic process                                                                          |                                    |
| GO:0031397 |     | 9.6156759661805e-06                                                                            | 8.67094017094017 1.04407999446405  |
| 8          | 92  | negative regulation of protein ubiquitination                                                  |                                    |
| GO:0051436 |     | 1.04696797282814e-05                                                                           | 10.5720806794055 0.760362604664037 |
| 7          | 67  | negative regulation of ubiquitin-protein ligase activity involved in mitotic cell cycle        |                                    |
| GO:0072401 |     | 1.04696797282814e-05                                                                           | 10.5720806794055 0.760362604664037 |
| 7          | 67  | signal transduction involved in DNA integrity checkpoint                                       |                                    |
| GO:0072404 |     | 1.04696797282814e-05                                                                           | 10.5720806794055 0.760362604664037 |
| 7          | 67  | signal transduction involved in G1/S transition checkpoint                                     |                                    |
| GO:0072422 |     | 1.04696797282814e-05                                                                           | 10.5720806794055 0.760362604664037 |
| 7          | 67  | signal transduction involved in DNA damage checkpoint                                          |                                    |
| GO:0042776 |     | 1.05566600669119e-05                                                                           | 39.6611111111111 0.147533042696007 |
| 4          | 13  | mitochondrial ATP synthesis coupled proton transport                                           |                                    |
| GO:0072395 |     | 1.15607817328684e-05                                                                           | 10.3980369635585 0.771711300256038 |
| 7          | 68  | signal transduction involved in cell cycle checkpoint                                          |                                    |
| GO:0051438 |     | 1.31827508045277e-05                                                                           | 8.27447552447553 1.08947477683205  |

Stable4\_20PerPair

|                             |          |                                                                     |                      |                  |                   |                   |       |        |      |
|-----------------------------|----------|---------------------------------------------------------------------|----------------------|------------------|-------------------|-------------------|-------|--------|------|
| 8                           | 96       | regulation of ubiquitin-protein ligase activity                     | 1.69123168055106e-05 | 9.75541401273885 | 0.81710608262404  |                   |       |        |      |
| GO:0033238                  | 72       | regulation of cellular amine metabolic process                      | 1.69123168055106e-05 | 9.75541401273885 | 0.81710608262404  |                   |       |        |      |
| GO:0051352                  | 72       | negative regulation of ligase activity                              | 1.69123168055106e-05 | 9.75541401273885 | 0.81710608262404  |                   |       |        |      |
| GO:0051444                  | 72       | negative regulation of ubiquitin-protein ligase activity            | 1.78042045340318e-05 | 7.91248606465998 | 1.13486955920006  |                   |       |        |      |
| GO:0051340                  | 100      | regulation of ligase activity                                       | 1.85293019263661e-05 | 9.60692916425401 | 0.82845477821604  |                   |       |        |      |
| GO:0031571                  | 73       | mitotic cell cycle G1/S transition DNA damage checkpoint            |                      |                  |                   |                   |       |        |      |
| Tissue: Artery_Tibial=>Lung |          | Type: asymmetric                                                    |                      |                  |                   |                   |       |        |      |
| SourceGene:                 |          | RFC1(ENSG00000035928.10)                                            |                      |                  |                   |                   |       |        |      |
| TargetGeneSet:              |          | MTND2P28                                                            | RPL22                | DNAJC11          | RPS8              | RP4               | SRP9  | UBC    | COA5 |
| BRK1                        | RPL15    | SCN5A                                                               | RP11                 | ANXA2R           | KIAA0825          | HINT1             | PRDM1 | CHCHD2 |      |
| SYPL1                       | ATP6V1C1 |                                                                     | AGAP11               | RPL27A           | C11orf31          | ANGPTL5           | STAT2 | HECTD1 |      |
| DACT1                       | ZFYVE26  | SIVA1                                                               | VPS18                | C15orf61         | HIC1              | RPL27             | RPL17 | ZNF236 | MIF  |
| RPL36                       |          |                                                                     |                      |                  |                   |                   |       |        |      |
| GOBPID                      | Pvalue   | OddsRatio                                                           | ExpCount             | Count            | Size              | Term              |       |        |      |
| GO:0006414                  | 105      | 5.01697336459565e-13                                                | 63.9508928571429     | 63.9508928571429 |                   | 0.21797799460245  |       |        |      |
| 9                           | 105      | translational elongation                                            |                      |                  |                   |                   |       |        |      |
| GO:0006614                  | 105      | 5.01697336459565e-13                                                | 63.9508928571429     | 63.9508928571429 |                   | 0.21797799460245  |       |        |      |
| 9                           | 105      | SRP-dependent cotranslational protein targeting to membrane         |                      |                  |                   |                   |       |        |      |
| GO:0006613                  | 106      | 5.47525666702937e-13                                                | 63.2871870397644     | 63.2871870397644 |                   | 0.220053975503425 |       |        |      |
| 9                           | 106      | cotranslational protein targeting to membrane                       |                      |                  |                   |                   |       |        |      |
| GO:0045047                  | 106      | 5.47525666702937e-13                                                | 63.2871870397644     | 63.2871870397644 |                   | 0.220053975503425 |       |        |      |
| 9                           | 106      | protein targeting to ER                                             |                      |                  |                   |                   |       |        |      |
| GO:0072599                  | 106      | 5.47525666702937e-13                                                | 63.2871870397644     | 63.2871870397644 |                   | 0.220053975503425 |       |        |      |
| 9                           | 106      | establishment of protein localization to endoplasmic reticulum      |                      |                  |                   |                   |       |        |      |
| GO:0070972                  | 118      | 1.46736138181706e-12                                                | 56.2726081258191     | 56.2726081258191 |                   | 0.244965746315134 |       |        |      |
| 9                           | 118      | protein localization to endoplasmic reticulum                       |                      |                  |                   |                   |       |        |      |
| GO:0006415                  | 91       | 9.44003889127307e-12                                                | 62.8170865279299     | 62.8170865279299 |                   | 0.18891426198879  |       |        |      |
| 8                           | 91       | translational termination                                           |                      |                  |                   |                   |       |        |      |
| GO:0006612                  | 153      | 1.56118916760135e-11                                                | 42.4910714285714     | 42.4910714285714 |                   | 0.317625077849284 |       |        |      |
| 9                           | 153      | protein targeting to membrane                                       |                      |                  |                   |                   |       |        |      |
| GO:0000184                  | 119      | 8.38542969311404e-11                                                | 46.8796068796069     | 46.8796068796069 |                   | 0.24704172721611  |       |        |      |
| 8                           | 119      | nuclear-transcribed mRNA catabolic process, nonsense-mediated decay |                      |                  |                   |                   |       |        |      |
| GO:0072594                  | 204      | 2.06567116178528e-10                                                | 31.2659340659341     | 31.2659340659341 |                   | 0.423500103799045 |       |        |      |
| 9                           | 204      | establishment of protein localization to organelle                  |                      |                  |                   |                   |       |        |      |
| GO:0019080                  | 151      | 5.68241249197198e-10                                                | 36.3076923076923     | 36.3076923076923 |                   | 0.313473116047332 |       |        |      |
| 8                           | 151      | viral genome expression                                             |                      |                  |                   |                   |       |        |      |
| GO:0019083                  | 151      | 5.68241249197198e-10                                                | 36.3076923076923     | 36.3076923076923 |                   | 0.313473116047332 |       |        |      |
| 8                           | 151      | viral transcription                                                 |                      |                  |                   |                   |       |        |      |
| GO:0006413                  | 152      | 5.98992822114789e-10                                                | 36.0530303030303     | 36.0530303030303 |                   | 0.315549096948308 |       |        |      |
| 8                           | 152      | translational initiation                                            |                      |                  |                   |                   |       |        |      |
| GO:0043624                  | 153      | 6.31179356207962e-10                                                | 35.8018808777429     | 35.8018808777429 |                   | 0.317625077849284 |       |        |      |
| 8                           | 153      | cellular protein complex disassembly                                |                      |                  |                   |                   |       |        |      |
| GO:0043241                  | 158      | 8.15671725087671e-10                                                | 34.5963636363636     | 34.5963636363636 |                   | 0.328004982354162 |       |        |      |
| 8                           | 158      | protein complex disassembly                                         |                      |                  |                   |                   |       |        |      |
| GO:0000956                  | 169      | 1.39316502393249e-09                                                | 32.2077922077922     | 32.2077922077922 |                   | 0.350840772264895 |       |        |      |
| 8                           | 169      | nuclear-transcribed mRNA catabolic process                          |                      |                  |                   |                   |       |        |      |
| GO:0034623                  | 174      | 1.75577584099916e-09                                                | 31.2267250821468     | 31.2267250821468 |                   | 0.361220676769774 |       |        |      |
| 8                           | 174      | cellular macromolecular complex disassembly                         |                      |                  |                   |                   |       |        |      |
| GO:0006402                  | 178      | 2.102229557835e-09                                                  | 30.483422459893      | 30.483422459893  | 0.369524600373677 | 8                 |       |        |      |
| 178                         |          | mRNA catabolic process                                              |                      |                  |                   |                   |       |        |      |
| GO:0032984                  | 179      | 2.19757703533489e-09                                                | 30.3030303030303     | 30.3030303030303 |                   | 0.371600581274652 |       |        |      |
| 8                           | 179      | macromolecular complex disassembly                                  |                      |                  |                   |                   |       |        |      |
| GO:0006401                  | 205      | 6.40579489682571e-09                                                | 26.2556529764652     | 26.2556529764652 |                   | 0.425576084700021 |       |        |      |
| 8                           | 205      | RNA catabolic process                                               |                      |                  |                   |                   |       |        |      |
| GO:0019058                  | 231      | 1.63240654798781e-08                                                | 23.1520587036282     | 23.1520587036282 |                   | 0.479551588125389 |       |        |      |
| 8                           | 231      | viral infectious cycle                                              |                      |                  |                   |                   |       |        |      |
| GO:0022415                  | 260      | 4.09700665663054e-08                                                | 20.4458874458874     | 20.4458874458874 |                   | 0.539755034253685 |       |        |      |
| 8                           | 260      | viral reproductive process                                          |                      |                  |                   |                   |       |        |      |



Stable4\_20PerPair

|                                              |                                                                     |                         |                     |
|----------------------------------------------|---------------------------------------------------------------------|-------------------------|---------------------|
| GO:0071845                                   | 8.1089228630068e-08                                                 | 18.6363636363636        | 0.589578575877102   |
| 8 284                                        | cellular component disassembly at cellular level                    |                         |                     |
| GO:0022411                                   | 9.03188654516489e-08                                                | 18.3649350649351        | 0.597882499481005   |
| 8 288                                        | cellular component disassembly                                      |                         |                     |
| GO:0033365                                   | 3.09825975321922e-07                                                | 12.8913177339901        | 0.981938966161511   |
| 9 473                                        | protein localization to organelle                                   |                         |                     |
| GO:0006605                                   | 3.15399742993329e-07                                                | 12.8626728110599        | 0.984014947062487   |
| 9 474                                        | protein targeting                                                   |                         |                     |
| GO:0016032                                   | 2.70433110559206e-06                                                | 11.4738354196593        | 0.936267386340046   |
| 8 451                                        | viral reproduction                                                  |                         |                     |
| Tissue: Lung=>Artery_Tibial Type: asymmetric |                                                                     |                         |                     |
| SourceGene: RP11-14I17.3(ENSG00000254362.1)  |                                                                     |                         |                     |
| TargetGeneSet:                               | RPL22 RP11 AMY2A FAHD2B UBE2V1 RPL37A RPL10AP6                      |                         |                     |
| COX7C SEC24A                                 | RPS10 TOMM7 GTF2I SNHG6 FBXO43 EIF3H PSCA RPLP2 FAU                 |                         |                     |
| ATP5G2 ANKS1B                                | RPS29 RPL36A MGAT2 RPLP1 C16orf55 RPL38 EIF3K                       |                         |                     |
| GOBPID Pvalue                                | OddsRatio ExpCount Count Size                                       | Term                    |                     |
| GO:0006413                                   | 3.92646057137708e-15                                                | 91.4724711907811        | 0.220884367863816   |
| 10 152                                       | translational initiation                                            |                         |                     |
| GO:0006415                                   | 3.43684867188714e-13                                                | 106.372567191844        | 0.132239983392153   |
| 8 91                                         | translational termination                                           |                         |                     |
| GO:0006414                                   | 1.11491359288827e-12                                                | 90.9310071371927        | 0.152584596221715   |
| 8 105                                        | translational elongation                                            |                         |                     |
| GO:0006614                                   | 1.11491359288827e-12                                                | 90.9310071371927        | 0.152584596221715   |
| 8 105                                        | SRP-dependent cotranslational protein targeting to membrane         |                         |                     |
| GO:0006613                                   | 1.2049572002447e-12                                                 | 89.9968602825746        | 0.154037782852398   |
| 8 106                                        | cotranslational protein targeting to membrane                       |                         |                     |
| GO:0045047                                   | 1.2049572002447e-12                                                 | 89.9968602825746        | 0.154037782852398   |
| 8 106                                        | protein targeting to ER                                             |                         |                     |
| GO:0072599                                   | 1.2049572002447e-12                                                 | 89.9968602825746        | 0.154037782852398   |
| 8 106                                        | establishment of protein localization to endoplasmic reticulum      |                         |                     |
| GO:0070972                                   | 2.89469742734692e-12                                                | 80.1118881118881        | 0.171476022420594   |
| 8 118                                        | protein localization to endoplasmic reticulum                       |                         |                     |
| GO:0000184                                   | 3.10082702951292e-12                                                | 79.3846153846154        | 0.172929209051277   |
| 8 119                                        | nuclear-transcribed mRNA catabolic process, nonsense-mediated decay |                         |                     |
| GO:0072594                                   | 4.73687877974069e-12                                                | 54.75 0.296450072659332 | 9 204               |
| 8 169                                        | establishment of protein localization to organelle                  |                         |                     |
| GO:0019080                                   | 2.13907017560942e-11                                                | 61.4825174825175        | 0.219431181233133   |
| 8 151                                        | viral genome expression                                             |                         |                     |
| GO:0019083                                   | 2.13907017560942e-11                                                | 61.4825174825175        | 0.219431181233133   |
| 8 151                                        | viral transcription                                                 |                         |                     |
| GO:0006612                                   | 2.37864207008614e-11                                                | 60.6259946949602        | 0.222337554494499   |
| 8 153                                        | protein targeting to membrane                                       |                         |                     |
| GO:0043624                                   | 2.37864207008614e-11                                                | 60.6259946949602        | 0.222337554494499   |
| 8 153                                        | cellular protein complex disassembly                                |                         |                     |
| GO:0043241                                   | 3.08249190817365e-11                                                | 58.5846153846154        | 0.229603487647914   |
| 8 158                                        | protein complex disassembly                                         |                         |                     |
| GO:0000956                                   | 5.2972725883944e-11                                                 | 54.539894887721         | 0.245588540585427 8 |
| 8 169                                        | nuclear-transcribed mRNA catabolic process                          |                         |                     |
| GO:0034623                                   | 6.69467825914751e-11                                                | 52.8785912882298        | 0.252854473738842   |
| 8 174                                        | cellular macromolecular complex disassembly                         |                         |                     |
| GO:0006402                                   | 8.03358941506834e-11                                                | 51.6199095022624        | 0.258667220261574   |
| 8 178                                        | mRNA catabolic process                                              |                         |                     |
| GO:0032984                                   | 8.40264151260377e-11                                                | 51.3144399460189        | 0.260120406892257   |
| 8 179                                        | macromolecular complex disassembly                                  |                         |                     |
| GO:0006401                                   | 2.48511036922702e-10                                                | 44.4607575165951        | 0.297903259290015   |
| 8 205                                        | RNA catabolic process                                               |                         |                     |
| GO:0019058                                   | 6.42550655272773e-10                                                | 39.205243187306         | 0.335686111687772 8 |
| 231                                          | viral infectious cycle                                              |                         |                     |
| GO:0022415                                   | 1.63902718783161e-09                                                | 34.6227106227106        | 0.377828523977579   |
| 8 260                                        | viral reproductive process                                          |                         |                     |
| GO:0071845                                   | 3.28786737084684e-09                                                | 31.5585284280936        | 0.412705003113971   |
| 8 284                                        | cellular component disassembly at cellular level                    |                         |                     |
| GO:0022411                                   | 3.67030348448347e-09                                                | 31.0989010989011        | 0.418517749636703   |

Stable4\_20PerPair

|                             |        |                                                                     |                  |       |      |                                                                     |   |                   |
|-----------------------------|--------|---------------------------------------------------------------------|------------------|-------|------|---------------------------------------------------------------------|---|-------------------|
| 8                           | 288    | cellular component disassembly                                      |                  |       |      |                                                                     |   |                   |
| GO:0033365                  |        | 8.28002994255104e-09                                                | 22.5743534482759 |       |      |                                                                     |   | 0.687357276313058 |
| 9                           | 473    | protein localization to organelle                                   |                  |       |      |                                                                     |   |                   |
| GO:0006605                  |        | 8.43381150091961e-09                                                | 22.5241935483871 |       |      |                                                                     |   | 0.688810462943741 |
| 9                           | 474    | protein targeting                                                   |                  |       |      |                                                                     |   |                   |
| GO:0016032                  |        | 1.20424027420166e-07                                                | 19.4297621114777 |       |      |                                                                     |   | 0.655387170438032 |
| 8                           | 451    | viral reproduction                                                  |                  |       |      |                                                                     |   |                   |
| Tissue: Lung=>Artery_Tibial |        | Type: asymmetric                                                    |                  |       |      |                                                                     |   |                   |
| SourceGene:                 |        | RP11-469J4.3(ENSG00000242578.1)                                     |                  |       |      |                                                                     |   |                   |
| TargetGeneSet:              |        | NOTCH2 MRPS21 KIRREL RP11 NAV1 RPL35P1 KIDINS220                    |                  |       |      |                                                                     |   |                   |
| EXOC6B MZT2A                |        | RPL37A TBC1D5 ZNF852 PBRM1 STAG1 TM4SF19-AS1 OCIAD1-AS1             |                  |       |      |                                                                     |   |                   |
| CLOCK WWC2                  |        | COX7C CTD RPS14 MRPL2 RPL39P3 PSMB1 C7orf50 TOMM7                   |                  |       |      |                                                                     |   |                   |
| MALSU1 HIP1                 |        | TAF6 SSBP1 SLC4A2 UQCRB ZNF706 HK1 RPLP2 FAU                        |                  |       |      |                                                                     |   |                   |
| ARHGEF17                    |        | YAP1 PFDN5 ATF7 RPL18AP3 MED13L PSME2P2 RPS29                       |                  |       |      |                                                                     |   |                   |
| C14orf2 MAPKBP1             |        | NR2F2 COX4I1 RPL13 CCT6B RPL38 WDR7 RSL24D1P8                       |                  |       |      |                                                                     |   |                   |
| C19orf53                    |        | RPL18A NDUFA13 FXYD1 ETFB IFNGR2 SLC38A5 ATRX RGAG1 MT              |                  |       |      |                                                                     |   |                   |
| GOBPID                      | Pvalue | OddsRatio                                                           | ExpCount         | Count | Size | Term                                                                |   |                   |
| GO:0006415                  |        | 3.21955477760918e-10                                                | 37.3116248778899 |       |      | translational termination                                           |   | 0.283371392983185 |
| 8                           | 91     | translational termination                                           |                  |       |      |                                                                     |   |                   |
| GO:0006414                  |        | 1.02297167185496e-09                                                | 31.8952354416272 |       |      | translational elongation                                            |   | 0.326966991903675 |
| 8                           | 105    | translational elongation                                            |                  |       |      |                                                                     |   |                   |
| GO:0006614                  |        | 1.02297167185496e-09                                                | 31.8952354416272 |       |      | SRP-dependent cotranslational protein targeting to membrane         |   | 0.326966991903675 |
| 8                           | 105    | SRP-dependent cotranslational protein targeting to membrane         |                  |       |      |                                                                     |   |                   |
| GO:0006613                  |        | 1.10395183700959e-09                                                | 31.5675675675676 |       |      | cotranslational protein targeting to membrane                       |   | 0.330080963255138 |
| 8                           | 106    | cotranslational protein targeting to membrane                       |                  |       |      |                                                                     |   |                   |
| GO:0045047                  |        | 1.10395183700959e-09                                                | 31.5675675675676 |       |      | protein targeting to ER                                             |   | 0.330080963255138 |
| 8                           | 106    | protein targeting to ER                                             |                  |       |      |                                                                     |   |                   |
| GO:0072599                  |        | 1.10395183700959e-09                                                | 31.5675675675676 |       |      | establishment of protein localization to endoplasmic reticulum      |   | 0.330080963255138 |
| 8                           | 106    | establishment of protein localization to endoplasmic reticulum      |                  |       |      |                                                                     |   |                   |
| GO:0070972                  |        | 2.60527694582146e-09                                                | 28.1002457002457 |       |      | protein localization to endoplasmic reticulum                       |   | 0.367448619472701 |
| 8                           | 118    | protein localization to endoplasmic reticulum                       |                  |       |      |                                                                     |   |                   |
| GO:0000184                  |        | 2.78666132651158e-09                                                | 27.845142439737  |       |      | nuclear-transcribed mRNA catabolic process, nonsense-mediated decay | 8 | 0.370562590824164 |
| 119                         |        | nuclear-transcribed mRNA catabolic process, nonsense-mediated decay |                  |       |      |                                                                     |   |                   |
| GO:0072594                  |        | 1.06541617984882e-08                                                | 18.2192307692308 |       |      | establishment of protein localization to organelle                  |   | 0.635250155698568 |
| 9                           | 204    | establishment of protein localization to organelle                  |                  |       |      |                                                                     |   |                   |
| GO:0019080                  |        | 1.83321836171405e-08                                                | 21.5656775656776 |       |      | viral genome expression                                             |   | 0.470209674070999 |
| 8                           | 151    | viral genome expression                                             |                  |       |      |                                                                     |   |                   |
| GO:0019083                  |        | 1.83321836171405e-08                                                | 21.5656775656776 |       |      | viral transcription                                                 |   | 0.470209674070999 |
| 8                           | 151    | viral transcription                                                 |                  |       |      |                                                                     |   |                   |
| GO:0006413                  |        | 1.93063668823183e-08                                                | 21.4144144144144 |       |      | translational initiation                                            |   | 0.473323645422462 |
| 8                           | 152    | translational initiation                                            |                  |       |      |                                                                     |   |                   |
| GO:0006612                  |        | 2.03249372007879e-08                                                | 21.2652376514445 |       |      | protein targeting to membrane                                       |   | 0.476437616773926 |
| 8                           | 153    | protein targeting to membrane                                       |                  |       |      |                                                                     |   |                   |
| GO:0043624                  |        | 2.03249372007879e-08                                                | 21.2652376514445 |       |      | cellular protein complex disassembly                                |   | 0.476437616773926 |
| 8                           | 153    | cellular protein complex disassembly                                |                  |       |      |                                                                     |   |                   |
| GO:0043241                  |        | 2.61444317343914e-08                                                | 20.5491891891892 |       |      | protein complex disassembly                                         |   | 0.492007473531244 |
| 8                           | 158    | protein complex disassembly                                         |                  |       |      |                                                                     |   |                   |
| GO:0000956                  |        | 4.42016157169263e-08                                                | 19.1304347826087 |       |      | nuclear-transcribed mRNA catabolic process                          |   | 0.526261158397343 |
| 8                           | 169    | nuclear-transcribed mRNA catabolic process                          |                  |       |      |                                                                     |   |                   |
| GO:0034623                  |        | 5.54487334207817e-08                                                | 18.5477043308369 |       |      | cellular macromolecular complex disassembly                         |   | 0.541831015154661 |
| 8                           | 174    | cellular macromolecular complex disassembly                         |                  |       |      |                                                                     |   |                   |
| GO:0006402                  |        | 6.6144265321733e-08                                                 | 18.106200317965  |       |      | mRNA catabolic process                                              | 8 | 0.554286900560515 |
| 178                         |        | mRNA catabolic process                                              |                  |       |      |                                                                     |   |                   |
| GO:0032984                  |        | 6.90801909820277e-08                                                | 17.9990516832622 |       |      | macromolecular complex disassembly                                  |   | 0.557400871911978 |
| 8                           | 179    | macromolecular complex disassembly                                  |                  |       |      |                                                                     |   |                   |
| GO:0071845                  |        | 1.83687142817769e-07                                                | 12.8463636363636 |       |      | cellular component disassembly at cellular level                    |   | 0.884367863815653 |
| 9                           | 284    | cellular component disassembly at cellular level                    |                  |       |      |                                                                     |   |                   |
| GO:0006401                  |        | 1.9656774814511e-07                                                 | 15.5950061736864 |       |      | RNA catabolic process                                               |   | 0.638364127050031 |
| 8                           | 205    | RNA catabolic process                                               |                  |       |      |                                                                     |   |                   |
| GO:0022411                  |        | 2.06815135429612e-07                                                | 12.6586021505376 |       |      | cellular component disassembly                                      |   | 0.896823749221507 |
| 9                           | 288    | cellular component disassembly                                      |                  |       |      |                                                                     |   |                   |
| GO:0019058                  |        | 4.88983744313021e-07                                                | 13.7515452672403 |       |      | viral infectious cycle                                              |   | 0.719327382188084 |
| 8                           | 231    | viral infectious cycle                                              |                  |       |      |                                                                     |   |                   |

Stable4\_20PerPair

|                             |                                                                     |                  |                   |      |                   |     |  |  |
|-----------------------------|---------------------------------------------------------------------|------------------|-------------------|------|-------------------|-----|--|--|
| GO:0016032                  | 9.5001796262223e-07                                                 | 9.04761904761905 | 1.40440107951007  |      |                   |     |  |  |
| 10 451                      | viral reproduction                                                  |                  |                   |      |                   |     |  |  |
| GO:0022415                  | 1.19467009618048e-06                                                | 12.1441441441441 | 0.809632551380527 |      |                   |     |  |  |
| 8 260                       | viral reproductive process                                          |                  |                   |      |                   |     |  |  |
| GO:0033365                  | 1.46260855257869e-06                                                | 8.60413452638075 | 1.47290844924227  |      |                   |     |  |  |
| 10 473                      | protein localization to organelle                                   |                  |                   |      |                   |     |  |  |
| GO:0006605                  | 1.49077133793387e-06                                                | 8.58497536945813 | 1.47602242059373  |      |                   |     |  |  |
| 10 474                      | protein targeting                                                   |                  |                   |      |                   |     |  |  |
| GO:0022904                  | 1.15325666764779e-05                                                | 19.6634615384615 | 0.298941249740502 |      |                   |     |  |  |
| 5 96                        | respiratory electron transport chain                                |                  |                   |      |                   |     |  |  |
| Tissue: Artery_Tibial=>Lung | Type: asymmetric                                                    |                  |                   |      |                   |     |  |  |
| SourceGene:                 | RP11-96L14.7(ENSG00000236782.1)                                     |                  |                   |      |                   |     |  |  |
| TargetGeneSet:              | RPL22 RPL11 ZNF593 RP11 RPS8 RPL5 GGCX RPL31                        |                  |                   |      |                   |     |  |  |
| RPL32 RPL14                 | RPL24 RPL34 RPL37 RPS14 EEF1A1 MRPS12 TRBV24-1 CTSB                 |                  |                   |      |                   |     |  |  |
| RPS20 RPL30                 | EIF3H RPS6 RPL35 RPS24 RPLP2 RPL27A RPS13 FAU                       |                  |                   |      |                   |     |  |  |
| RPS25 NACA                  | TPT1 RPS29 RPS3AP6 RPLP1 RPL13 RPL17 RPL19 RPL27                    |                  |                   |      |                   |     |  |  |
| RPL36 RPS16                 | RPL13A RPS11 RPS9 RPS21 RPL3 UQCRBP1 RPL10                          |                  |                   |      |                   |     |  |  |
| GOBPID Pvalue               | OddsRatio                                                           | ExpCount         | Count             | Size | Term              |     |  |  |
| GO:0006414                  | 1.97525674743371e-72                                                | 935.086956521739 |                   |      | 0.31970105875026  |     |  |  |
| 36 105                      | translational elongation                                            |                  |                   |      |                   |     |  |  |
| GO:0006415                  | 3.43864902203077e-72                                                | 996.597222222222 |                   |      | 0.277074250916892 |     |  |  |
| 35 91                       | translational termination                                           |                  |                   |      |                   |     |  |  |
| GO:0006614                  | 1.61864780111005e-69                                                | 796.5            | 0.31970105875026  |      | 35                | 105 |  |  |
| SRP-dependent               | cotranslational protein targeting to membrane                       |                  |                   |      |                   |     |  |  |
| GO:0006613                  | 2.41509908595394e-69                                                | 785.226917057903 |                   |      | 0.322745830738357 |     |  |  |
| 35 106                      | cotranslational protein targeting to membrane                       |                  |                   |      |                   |     |  |  |
| GO:0045047                  | 2.41509908595394e-69                                                | 785.226917057903 |                   |      | 0.322745830738357 |     |  |  |
| 35 106                      | protein targeting to ER                                             |                  |                   |      |                   |     |  |  |
| GO:0072599                  | 2.41509908595394e-69                                                | 785.226917057903 |                   |      | 0.322745830738357 |     |  |  |
| 35 106                      | establishment of protein localization to endoplasmic reticulum      |                  |                   |      |                   |     |  |  |
| GO:0070972                  | 2.11197063344298e-67                                                | 671.137884872825 |                   |      | 0.35928309459553  |     |  |  |
| 35 118                      | protein localization to endoplasmic reticulum                       |                  |                   |      |                   |     |  |  |
| GO:0000184                  | 2.99013222654803e-67                                                | 663.101851851852 |                   |      | 0.362327866583627 |     |  |  |
| 35 119                      | nuclear-transcribed mRNA catabolic process, nonsense-mediated decay |                  |                   |      |                   |     |  |  |
| GO:0006413                  | 1.17751969382613e-65                                                | 554.39224137931  | 0.462805342190852 |      | 36                |     |  |  |
| 152                         | translational initiation                                            |                  |                   |      |                   |     |  |  |
| GO:0019080                  | 4.43240956748714e-63                                                | 479.104406130268 |                   |      | 0.459760570202754 |     |  |  |
| 35 151                      | viral genome expression                                             |                  |                   |      |                   |     |  |  |
| GO:0019083                  | 4.43240956748714e-63                                                | 479.104406130268 |                   |      | 0.459760570202754 |     |  |  |
| 35 151                      | viral transcription                                                 |                  |                   |      |                   |     |  |  |
| GO:0006612                  | 7.45719533960017e-63                                                | 470.918079096045 |                   |      | 0.46585011417895  |     |  |  |
| 35 153                      | protein targeting to membrane                                       |                  |                   |      |                   |     |  |  |
| GO:0043624                  | 7.45719533960017e-63                                                | 470.918079096045 |                   |      | 0.46585011417895  |     |  |  |
| 35 153                      | cellular protein complex disassembly                                |                  |                   |      |                   |     |  |  |
| GO:0043241                  | 2.64851024598509e-62                                                | 451.616982836495 |                   |      | 0.481073974119438 |     |  |  |
| 35 158                      | protein complex disassembly                                         |                  |                   |      |                   |     |  |  |
| GO:0000956                  | 3.69334038571315e-61                                                | 414.224709784411 |                   |      | 0.514566465988513 |     |  |  |
| 35 169                      | nuclear-transcribed mRNA catabolic process                          |                  |                   |      |                   |     |  |  |
| GO:0034623                  | 1.14860445592635e-60                                                | 399.184652278177 |                   |      | 0.529790325929001 |     |  |  |
| 35 174                      | cellular macromolecular complex disassembly                         |                  |                   |      |                   |     |  |  |
| GO:0006402                  | 2.77381950384788e-60                                                | 387.909867909868 |                   |      | 0.541969413881392 |     |  |  |
| 35 178                      | mRNA catabolic process                                              |                  |                   |      |                   |     |  |  |
| GO:0032984                  | 3.44589867297839e-60                                                | 385.189043209877 |                   |      | 0.54501418586949  |     |  |  |
| 35 179                      | macromolecular complex disassembly                                  |                  |                   |      |                   |     |  |  |
| GO:0072594                  | 5.24187975638026e-58                                                | 327.633136094675 |                   |      | 0.621133485571933 |     |  |  |
| 35 204                      | establishment of protein localization to organelle                  |                  |                   |      |                   |     |  |  |
| GO:0006401                  | 6.31720966569355e-58                                                | 325.683006535948 |                   |      | 0.62417825756003  |     |  |  |
| 35 205                      | RNA catabolic process                                               |                  |                   |      |                   |     |  |  |
| GO:0019058                  | 5.85559460952628e-56                                                | 281.964285714286 |                   |      | 0.703342329250571 |     |  |  |
| 35 231                      | viral infectious cycle                                              |                  |                   |      |                   |     |  |  |
| GO:0022415                  | 4.95867185056708e-54                                                | 245.120987654321 |                   |      | 0.791640716905404 |     |  |  |
| 35 260                      | viral reproductive process                                          |                  |                   |      |                   |     |  |  |
| GO:0071845                  | 1.32699761335688e-52                                                | 221.120035698349 |                   |      | 0.864715244619749 |     |  |  |

Stable4\_20PerPair

|                                              |         |                                                                                          |                  |                   |         |                    |       |
|----------------------------------------------|---------|------------------------------------------------------------------------------------------|------------------|-------------------|---------|--------------------|-------|
| 35                                           | 284     | cellular component disassembly at cellular level                                         |                  |                   |         |                    |       |
| GO:0022411                                   |         | 2.22919411718453e-52                                                                     | 217.562582345191 |                   |         | 0.87689433257214   |       |
| 35                                           | 288     | cellular component disassembly                                                           |                  |                   |         |                    |       |
| GO:0016032                                   |         | 2.94340186076153e-45                                                                     | 130.791933760684 |                   |         | 1.37319216663207   |       |
| 35                                           | 451     | viral reproduction                                                                       |                  |                   |         |                    |       |
| GO:0033365                                   |         | 1.64019212160537e-44                                                                     | 124.027143581938 |                   |         | 1.44017715037022   |       |
| 35                                           | 473     | protein localization to organelle                                                        |                  |                   |         |                    |       |
| GO:0006605                                   |         | 1.76985173622779e-44                                                                     | 123.73576309795  | 1.44322192235831  |         |                    | 35    |
| 474                                          |         | protein targeting                                                                        |                  |                   |         |                    |       |
| GO:0042274                                   |         | 4.56291058623043e-14                                                                     | 247.597051597052 |                   |         | 0.0548058957857588 |       |
| 7                                            | 18      | ribosomal small subunit biogenesis                                                       |                  |                   |         |                    |       |
| GO:0042254                                   |         | 1.84125380903576e-11                                                                     | 30.1904358865849 |                   |         | 0.453671026226559  |       |
| 10                                           | 149     | ribosome biogenesis                                                                      |                  |                   |         |                    |       |
| GO:0006364                                   |         | 2.09431075921755e-11                                                                     | 38.7392481203008 |                   |         | 0.316656286762162  |       |
| 9                                            | 104     | rRNA processing                                                                          |                  |                   |         |                    |       |
| GO:0016072                                   |         | 3.49321364128278e-11                                                                     | 36.422630834512  | 0.334924918690748 |         |                    | 9     |
| 110                                          |         | rRNA metabolic process                                                                   |                  |                   |         |                    |       |
| GO:0022613                                   |         | 4.98619319428979e-11                                                                     | 22.107476635514  | 0.685073697321985 |         |                    | 11    |
| 225                                          |         | ribonucleoprotein complex biogenesis                                                     |                  |                   |         |                    |       |
| GO:0071843                                   |         | 9.5425123723057e-11                                                                      | 20.7295321637427 |                   |         | 0.727700505155353  |       |
| 11                                           | 239     | cellular component biogenesis at cellular level                                          |                  |                   |         |                    |       |
| GO:0030490                                   |         | 2.59849612795674e-09                                                                     | 480.133333333333 |                   |         | 0.021313403916684  |       |
| 4                                            | 7       | maturation of SSU-rRNA                                                                   |                  |                   |         |                    |       |
| GO:0034470                                   |         | 7.25689103555196e-09                                                                     | 19.1389678384443 |                   |         | 0.608954397619542  |       |
| 9                                            | 200     | ncRNA processing                                                                         |                  |                   |         |                    |       |
| GO:0034660                                   |         | 1.54035450347411e-07                                                                     | 13.1655279503106 |                   |         | 0.867760016607847  |       |
| 9                                            | 285     | ncRNA metabolic process                                                                  |                  |                   |         |                    |       |
| GO:0000028                                   |         | 5.23384924917998e-07                                                                     | 351.317073170732 |                   |         | 0.0182686319285863 |       |
| 3                                            | 6       | ribosomal small subunit assembly                                                         |                  |                   |         |                    |       |
| GO:0000462                                   |         | 5.23384924917998e-07                                                                     | 351.317073170732 |                   |         | 0.0182686319285863 |       |
| 3                                            | 6       | maturation of SSU-rRNA from tricistronic rRNA transcript (SSU-rRNA, 5.8S rRNA, LSU-rRNA) |                  |                   |         |                    |       |
| GO:0042273                                   |         | 5.68413960043026e-06                                                                     | 117.056910569106 |                   |         | 0.0365372638571725 |       |
| 3                                            | 12      | ribosomal large subunit biogenesis                                                       |                  |                   |         |                    |       |
| GO:0042255                                   |         | 1.43460475172112e-05                                                                     | 81.0168855534709 |                   |         | 0.0487163518095634 |       |
| 3                                            | 16      | ribosome assembly                                                                        |                  |                   |         |                    |       |
| Tissue: Artery_Tibial=>Lung Type: asymmetric |         |                                                                                          |                  |                   |         |                    |       |
| SourceGene: SPOCD1(ENSG00000134668.7)        |         |                                                                                          |                  |                   |         |                    |       |
| TargetGeneSet:                               | RPL22   | AKR7L                                                                                    | C1orf210         | RPS8              | RPL5    | RP11               | RPS7  |
| ITGB1BP1                                     | PEX13   | GGCX                                                                                     | FHL2             | HOXD8             | MFF     | RPL15              | LIMD1 |
| THOC7                                        | YEATS2  | RPL34                                                                                    | FAM160A1         | BTF3              | AP3S1   | THG1L              | FNDC1 |
| TRIM50                                       | RUNDC3B | SLC25A13                                                                                 | RPL30            | CHRAC1            | TUSC1   | ASPEN              | NR6A1 |
| TRAF6                                        | MSANTD4 | TEX12                                                                                    | RPS25            | SIAE              | ZCRB1   | RNASEH2B           | RP4   |
| DICER1-AS1                                   | DUOXA1  | DUOX1                                                                                    | RPL4             | RPS15A            | RABEP2  | RPL26              | CDH2  |
| ZNF737                                       | ZNF428  | SSC5D                                                                                    | PTPRA            | SMARCB1           | SEC14L4 | OGT                | RP6   |
| BCORL1                                       | IGSF1   |                                                                                          |                  |                   |         |                    | KLHL4 |
| GOBPID                                       | Pvalue  | OddsRatio                                                                                | ExpCount         | Count             | Size    | Term               |       |
| GO:0006415                                   |         | 6.18283030552637e-15                                                                     | 53.2273648648649 |                   |         | 0.302262819182064  |       |
| 11                                           | 91      | translational termination                                                                |                  |                   |         |                    |       |
| GO:0006414                                   |         | 3.14913099296321e-14                                                                     | 45.2556066705003 |                   |         | 0.348764791363919  |       |
| 11                                           | 105     | translational elongation                                                                 |                  |                   |         |                    |       |
| GO:0006614                                   |         | 3.14913099296321e-14                                                                     | 45.2556066705003 |                   |         | 0.348764791363919  |       |
| 11                                           | 105     | SRP-dependent cotranslational protein targeting to membrane                              |                  |                   |         |                    |       |
| GO:0006613                                   |         | 3.50547736857288e-14                                                                     | 44.7761024182077 |                   |         | 0.352086360805481  |       |
| 11                                           | 106     | cotranslational protein targeting to membrane                                            |                  |                   |         |                    |       |
| GO:0045047                                   |         | 3.50547736857288e-14                                                                     | 44.7761024182077 |                   |         | 0.352086360805481  |       |
| 11                                           | 106     | protein targeting to ER                                                                  |                  |                   |         |                    |       |
| GO:0072599                                   |         | 3.50547736857288e-14                                                                     | 44.7761024182077 |                   |         | 0.352086360805481  |       |
| 11                                           | 106     | establishment of protein localization to endoplasmic reticulum                           |                  |                   |         |                    |       |
| GO:0019080                                   |         | 5.48979982789341e-14                                                                     | 34.2062350119904 |                   |         | 0.501556985675732  |       |
| 12                                           | 151     | viral genome expression                                                                  |                  |                   |         |                    |       |
| GO:0019083                                   |         | 5.48979982789341e-14                                                                     | 34.2062350119904 |                   |         | 0.501556985675732  |       |
| 12                                           | 151     | viral transcription                                                                      |                  |                   |         |                    |       |

Stable4\_20PerPair

|                                           |                                                    |                                                                     |                    |          |         |            |          |          |
|-------------------------------------------|----------------------------------------------------|---------------------------------------------------------------------|--------------------|----------|---------|------------|----------|----------|
| GO:0072594                                | 7.53061646116167e-14                               | 27.637397157816                                                     | 0.677600166078472  | 13       |         |            |          |          |
| 204                                       | establishment of protein localization to organelle |                                                                     |                    |          |         |            |          |          |
| GO:0070972                                | 1.17282443718462e-13                               | 39.7211417024501                                                    | 0.391945194104214  |          |         |            |          |          |
| 11                                        | 118                                                | protein localization to endoplasmic reticulum                       |                    |          |         |            |          |          |
| GO:0000184                                | 1.2892281125846e-13                                | 39.3506006006006                                                    | 0.395266763545775  |          |         |            |          |          |
| 11                                        | 119                                                | nuclear-transcribed mRNA catabolic process, nonsense-mediated decay |                    |          |         |            |          |          |
| GO:0034623                                | 3.03097968682246e-13                               | 29.3024691358025                                                    | 0.577953082831638  |          |         |            |          |          |
| 12                                        | 174                                                | cellular macromolecular complex disassembly                         |                    |          |         |            |          |          |
| GO:0032984                                | 4.25593784698778e-13                               | 28.4151696606786                                                    | 0.594560930039444  |          |         |            |          |          |
| 12                                        | 179                                                | macromolecular complex disassembly                                  |                    |          |         |            |          |          |
| GO:0022415                                | 1.69033341926163e-12                               | 21.2872180451128                                                    | 0.863608054805896  |          |         |            |          |          |
| 13                                        | 260                                                | viral reproductive process                                          |                    |          |         |            |          |          |
| GO:0006413                                | 1.95749546305293e-12                               | 30.0713053479011                                                    | 0.504878555117293  |          |         |            |          |          |
| 11                                        | 152                                                | translational initiation                                            |                    |          |         |            |          |          |
| GO:0006612                                | 2.10414550553252e-12                               | 29.8574419489912                                                    | 0.508200124558854  |          |         |            |          |          |
| 11                                        | 153                                                | protein targeting to membrane                                       |                    |          |         |            |          |          |
| GO:0043624                                | 2.10414550553252e-12                               | 29.8574419489912                                                    | 0.508200124558854  |          |         |            |          |          |
| 11                                        | 153                                                | cellular protein complex disassembly                                |                    |          |         |            |          |          |
| GO:0006401                                | 2.14148223372021e-12                               | 24.5423143350604                                                    | 0.680921735520033  |          |         |            |          |          |
| 12                                        | 205                                                | RNA catabolic process                                               |                    |          |         |            |          |          |
| GO:0043241                                | 2.99731007256948e-12                               | 28.8317705460563                                                    | 0.52480797176666   |          |         |            |          |          |
| 11                                        | 158                                                | protein complex disassembly                                         |                    |          |         |            |          |          |
| GO:0071845                                | 5.17613432623823e-12                               | 19.3691091196626                                                    | 0.943325721403363  |          |         |            |          |          |
| 13                                        | 284                                                | cellular component disassembly at cellular level                    |                    |          |         |            |          |          |
| GO:0022411                                | 6.17595894880333e-12                               | 19.081974025974                                                     | 0.956611999169608  | 13       |         |            |          |          |
| 288                                       | cellular component disassembly                     |                                                                     |                    |          |         |            |          |          |
| GO:0000956                                | 6.2693993305163e-12                                | 26.8037974683544                                                    | 0.561345235623832  |          |         |            |          |          |
| 11                                        | 169                                                | nuclear-transcribed mRNA catabolic process                          |                    |          |         |            |          |          |
| GO:0019058                                | 8.77082327890228e-12                               | 21.5890410958904                                                    | 0.767282541000623  |          |         |            |          |          |
| 12                                        | 231                                                | viral infectious cycle                                              |                    |          |         |            |          |          |
| GO:0006402                                | 1.1047880814047e-11                                | 25.3432594270918                                                    | 0.591239360597883  |          |         |            |          |          |
| 11                                        | 178                                                | mRNA catabolic process                                              |                    |          |         |            |          |          |
| GO:0016032                                | 1.59915347183911e-09                               | 11.8424657534247                                                    | 1.49802781814407   |          |         |            |          |          |
| 13                                        | 451                                                | viral reproduction                                                  |                    |          |         |            |          |          |
| GO:0033365                                | 2.84643893940064e-09                               | 11.2583229813665                                                    | 1.57110234585842   |          |         |            |          |          |
| 13                                        | 473                                                | protein localization to organelle                                   |                    |          |         |            |          |          |
| GO:0006605                                | 2.91995796837528e-09                               | 11.2330957545708                                                    | 1.57442391529998   |          |         |            |          |          |
| 13                                        | 474                                                | protein targeting                                                   |                    |          |         |            |          |          |
| GO:0022613                                | 8.64531046197235e-06                               | 11.1093085701499                                                    | 0.747353124351256  |          |         |            |          |          |
| 7                                         | 225                                                | ribonucleoprotein complex biogenesis                                |                    |          |         |            |          |          |
| GO:0071843                                | 1.28092044106524e-05                               | 10.4286164844407                                                    | 0.793855096533112  |          |         |            |          |          |
| 7                                         | 239                                                | cellular component biogenesis at cellular level                     |                    |          |         |            |          |          |
| Tissue: Lung=>Artery_Tibial Type: cluster |                                                    |                                                                     |                    |          |         |            |          |          |
| SourceGene: SYCN(ENSG00000179751.5)       |                                                    |                                                                     |                    |          |         |            |          |          |
| TargetGeneSet:                            | HES2                                               | CELA2A                                                              | CELA3B             | CELA3A   | RP1     | RP11       | CLCA4    | AMY2A    |
| SCARNA2                                   | BCL9                                               | CRNN                                                                | SPRR1B             | SPRR2D   | TKT     | PPP1R12B   | C4BPA    | PRKD3    |
| MAP4K3                                    | REG1B                                              | REG1A                                                               | REG3A              | IGKV2-24 | ITGA9   | APPL1      | CPB1     | SCARNA7  |
| C3orf70                                   | CC2D2A                                             | NR3C2                                                               | LRBA               | SPINK1   | PRL     | HIST1H1E   | MUC21    | CLPS     |
| SRPK1                                     | PGC                                                | 7SK                                                                 | NHSL1              | JAZF1    | CPA2    | CPA1       | PRSS1    | PRSS3P1  |
| KBTBD11                                   | EFHA2                                              | FGL1                                                                | VPS28              | RGP1     | ORM1    | RP11-88G17 | MRPL41   | PRSS3P2  |
| MAPK8                                     | PNLIP                                              | PNLIPRP2                                                            | PARVA              | CD248    | FAM168A | CREBZF     | TAF1D    | RHEB     |
| KRT6A                                     | KRT4                                               | MSRB3                                                               | PLA2G1B            | GJB2     | HMGB1   | EXOC5      | DNAL1    | WDR85    |
| TTLL5                                     | HERC2P10                                           | MAP1A                                                               | RHCG               | C15orf38 | CIB1    | PCSK6      | SPSB3    | RECQL    |
| GP2                                       | CTRB2                                              | CTRB1                                                               | TSR1               | KRT33B   | KRT13   | AOC3       | GH1      | C14orf45 |
| SCARNA18                                  | SERPINB3                                           | FGF22                                                               | GPX4               | TMIGD2   | ALKBH7  | CEP112     | SCARNA17 | E4F1     |
| RP4                                       | MAP1LC3A                                           | CTD                                                                 | C21orf119          | PEX26    | HIRA    | ZNF426     | SYCN     | KLK1     |
| TRABD                                     | FAM123B                                            | ZC4H2                                                               | TTC3P1             | APOOL    | MID2    | MT         | RBFOX2   | APOBEC3C |
| GOBPID                                    | Pvalue                                             | OddsRatio                                                           | ExpCount           | Count    | Size    | Term       |          |          |
| GO:0007586                                | 7.64920615419947e-10                               | 19.2148148148148                                                    | 0.641132101584665  |          |         |            |          |          |
| 10                                        | 109                                                | digestion                                                           |                    |          |         |            |          |          |
| GO:0044241                                | 1.44827079758011e-06                               | 64.4444444444444                                                    | 0.0882291882914677 |          |         |            |          |          |
| 4                                         | 15                                                 | lipid digestion                                                     |                    |          |         |            |          |          |
| Tissue: Lung=>Artery_Tibial Type: cluster |                                                    |                                                                     |                    |          |         |            |          |          |

Stable4\_20PerPair

SourceGene: TMEM138(ENSG00000149483.6)  
 TargetGeneSet: MRPL20 SDHB UBR4 ATP1F1 MECR PSMB2 UQCRH MAGOH  
 ALG14 RP4 UFC1 SDHC SNRPE MORN2 COX5B CCDC93 PKP4 MOB4  
 MYEOV2 HDLBP LSM3 SLC6A6 KRBOX1 LZTFL1 SPCS1 CHMP2B RP11 MRPL47  
 MRPL1 MRPS18C LAMTOR3 ANAPC10 FRG1 PDCD6 FASTKD3 SUB1 MRPS30 COX7C SKP1  
 PDF DIAPH1 ATOX1 MRPL22 UBLCP1 NUDCD2 TMEM14B HLA-F-AS1 HNRNPC  
 SRPK1 SLC29A1 ECHDC1 MRPS12 TAB2 RP1 MLLT4 PSMB1 C7orf50 NUDT1 RPA3  
 NDUFA4 LSM5 EPDR1 YAE1D1 PPIA CHCHD2 SKP1P1 STAG3L4 KIAA1147  
 SSBP1 TAS2R5 NAT1 ZNF703 MRPS35 COX6C UBR5 UTP23 NDUFB9 TUSC1  
 NDUFB6 DCTN3 ISCA1 ATP6V1G1 CDC123 OPTN PLAC9 C10orf32  
 MRPL23 C11orf58 IMMP1L INCENP BAD MRPL11 NDUFS8 LAMTOR1 DCUN1D5  
 C11orf1 ATP5L CBL ARHGEF12 C12orf69 PRR13 R3HDM2 UBE2N  
 CCDC53 COX6A1 RFXAP MED4 COMMD6 A2LD1 C14orf126 MBIP PSMA3 ERH  
 RP3 SLIRP CDCA4 NDN SRP14 PHGR1 CHST14 GTF2A2 WDR61 MAN2A2 CTD  
 NDUFAB1 TMEM219 PLD2 FAM106A TMEM132E PSMB3 MRPS23 MAP2K6 ICT1  
 ELAC1 BSG UQCR11 MRPL54 C19orf70 NDUFA11 ALKBH7 OR7D2 PIN1 DNMT2  
 SWSAP1 WDR83OS C19orf53 GIPC1 NDUFB7 NDUFA13 ZNF726 COX6B1 ZNF428  
 AP2S1 C19orf63 MCM8 SNRPB2 C20orf4 ZNF334 DIP2A MTMR3 PATZ1 TXN2  
 CXorf38 FUNDC1 GSPT2 PDZD11 PIN4 NGFRAP1 NXT2 NDUFA1 THOC2  
 GOBPID Pvalue OddsRatio ExpCount Count Size Term  
 GO:0022904 2.28502963868585e-20 30.288961038961 0.896823749221507 19  
 96 respiratory electron transport chain  
 GO:0022900 7.964367203689e-19 21.6659038901602 1.25181648328835  
 20 134 electron transport chain  
 GO:0045333 2.60949951688323e-18 20.2337847469708 1.32655179572348  
 20 142 cellular respiration  
 GO:0015980 8.78165891987501e-13 9.03662127346338 2.86796761469794  
 21 307 energy derivation by oxidation of organic compounds  
 GO:0006091 9.6882034216554e-12 7.05363756613757 3.99833921527922  
 23 428 generation of precursor metabolites and energy  
 GO:0042773 1.08965520046757e-08 23.0599636583889 0.439069960556363  
 8 47 ATP synthesis coupled electron transport  
 GO:0042775 1.08965520046757e-08 23.0599636583889 0.439069960556363  
 8 47 mitochondrial ATP synthesis coupled electron transport  
 GO:0006120 3.53695208346047e-08 26.9420797413793 0.336308905958065  
 7 36 mitochondrial electron transport, NADH to ubiquinone  
 GO:0006119 6.09371845813226e-08 17.9729133858268 0.541831015154661  
 8 58 oxidative phosphorylation  
 GO:0051443 9.3903136075027e-07 12.1234305171313 0.766036952460037  
 8 82 positive regulation of ubiquitin-protein ligase activity  
 GO:0051351 1.35489818955297e-06 11.4984857662023 0.8034046086776 8  
 86 positive regulation of ligase activity  
 GO:0051438 3.13130240229175e-06 10.184681460272 0.896823749221507 8  
 96 regulation of ubiquitin-protein ligase activity  
 GO:0051340 4.259098915901e-06 9.73913043478261 0.93419140543907  
 8 100 regulation of ligase activity  
 Tissue: Lung=>Heart\_Left\_Ventricle Type: asymmetric

STable4\_20PerPair

SourceGene: BCL6(ENSG00000113916.13) B-cell lymphoma 6 protein isoform 1

|                |          |         |          |         |          |          |          |            |             |
|----------------|----------|---------|----------|---------|----------|----------|----------|------------|-------------|
| TargetGeneSet: | KLHL17   | s       | CAPZB    | PLA2G2A | ASAP3    | INPP5B   | UTP11L   | KIAA1107   |             |
| ECM1           | BNIPL    | LYSMD1  | SNX27    | ILF2    | FAM189B  | LMNA     | PMF1     | CRABP2     | RGS5 DPT    |
| CEP350         | TGFB2    | C2orf44 | AFF3     | GCC2    | GALNT5   | FRZB     | COL3A1   | COL5A2     | SATB2       |
| KANSL1L        | FN1      | ARPC2   | SLC23A3  | GALNTL2 | TGFBR2   | TRANK1   | ROB01    | CCDC80     | KLF15       |
| ABTB1          | TNIK     | BCL6    | 11-Sep   | AFF1    | UNC5C    | ARSJ     | PDE5A    | BBS12      | PHF17       |
| EDNRA          | LPCAT1   | RAI14   | PTGER4   | SLC38A9 | GUSBP9   | KLHL35   | ARSK     | PPP2CA     | PHF15 BRD8  |
| SOX9           | SPARC    | CNOT8   | ADAM19   | ADRA1B  | PDLIM7   | DTNBP1   | IER3     | CCND3      | FBX09       |
| COL12A1        | KIAA1009 |         | RP11     | LFNG    | 7-Sep    | COL1A2   | ECD      | RP13       | PCOLCE      |
| NAMPT          | IMPDH1   | CALU    | TNPO3    | DCTN6   | UBXN2B   | MSC      | SDC2     | YWHAZ      | EXT1        |
| COL14A1        | CER1     | FREM1   | DNAJB5   | OGN     | ASPN     | ECM2     | C9orf3   | PTCH1      | COL15A1     |
| MSANTD3        | CDK5RAP2 |         | PSMB7    | RXRA    | COL5A1   | WAC      | ZNF37BP  | CSGALNACT2 |             |
| KIAA0913       |          | FRAT2   | AP2A2    | HTATIP2 | PRG2     | CARNS1   | DYNC2H1  | KBTBD3     | ZBTB16      |
| SCN4B          | HINFP    | TSPAN9  | NTN4     | EMP1    | C12orf35 |          | TENC1    | PSG1       | ZC3H10 AVIL |
| CTDSP2         | LUM      | GLT8D2  | CMKLR1   | TMEM119 | MPHOSPH8 |          | AP1G2    | LRFN5      | MLH3 DIO2   |
| ACTC1          | ANKDD1A  | CILP    | ZWILCH   | FEM1B   | LRRC49   | COMMD4   | WDR61    | MRPL28     | TNFRSF12A   |
| PPL            | MT1M     | MT1X    | HSD11B2  | AARS    | ZNRF1    | CENPN    | KIAA1609 |            | ACSF3       |
| WDR81          | SPAG7    | CTC1    | C17orf39 |         | GHDC     | STAT3    | EZH1     | SCRN2      | COPZ2       |
| STXBP4         | MRC2     | PRKAR1A | GGA3     | LLGL2   | RECQL5   | RHBDF2   | MYL12B   | CXXC1      | MOB3A       |
| DAPK3          | CDC37    | WDR83   | C19orf44 |         | LSM4     | ZNF14    | PSMC4    | ADCK4      | TMEM91      |
| ZNF233         | SNRPB    | MAVS    | PHF20    | SAMHD1  | PLCG1    | PKIG     | ELMO2    | APCDD1L    | SYNJ1       |
| COL6A2         | TFIP11   | TPST2   | TTLL12   | NRK     | TSC22D3  | KIAA1210 |          | PGRMC1     | HMGB3       |
| PNMA6C         | GAB3     |         |          |         |          |          |          |            |             |

|        |        |           |          |       |      |      |
|--------|--------|-----------|----------|-------|------|------|
| GOBPID | Pvalue | OddsRatio | ExpCount | Count | Size | Term |
|--------|--------|-----------|----------|-------|------|------|

STable4\_20PerPair

|                              |          |            |             |   |    |
|------------------------------|----------|------------|-------------|---|----|
| GO:0030199                   | 1.00E-10 | 33.4171875 | 0.385924849 | 9 | 33 |
| collagen fibril organization |          |            |             |   |    |

|                                   |          |             |             |    |     |
|-----------------------------------|----------|-------------|-------------|----|-----|
| GO:0030198                        | 5.13E-08 | 7.958333333 | 1.882845478 | 13 | 161 |
| extracellular matrix organization |          |             |             |    |     |

|                                      |          |             |            |    |     |
|--------------------------------------|----------|-------------|------------|----|-----|
| GO:0043062                           | 5.53E-08 | 7.904362416 | 1.89454017 | 13 | 162 |
| extracellular structure organization |          |             |            |    |     |



STable4\_20PerPair

Tissue: Heart\_Left\_Ventricle=>Lung      Type: asymmetric

SourceGene: C15orf40(ENSG00000169609.8)      "Unknown protein (BLAST reveals a conserved domain of unknown function, DIF167 superfamily)"

TargetGeneSet: RPL5      RP11      ZEB2      RPL32      CTB      RPL10A      MRPS12      PDGFA  
 AIMP2      ZDHHC4      RPS6      NFKBIA      EXD1      RPL4      RANBP10      R3HDM4      TIMM44      LILRB4      CTA  
 RPL3      RPL10

| GOBPID     | Pvalue   | OddsRatio | ExpCount    | Count       | Size | Term                                                                         |
|------------|----------|-----------|-------------|-------------|------|------------------------------------------------------------------------------|
| GO:0006415 | 9.34E-12 |           | 108.7045455 | 0.113348557 | 7    | 91<br>translational termination                                              |
| GO:0006414 | 2.60E-11 |           | 93.08441558 | 0.130786797 | 7    | 105<br>translational elongation                                              |
| GO:0006614 | 2.60E-11 |           | 93.08441558 | 0.130786797 | 7    | 105<br>SRP-dependent cotranslational protein targeting to membrane           |
| GO:0006613 | 2.78E-11 |           | 92.13774105 | 0.132032385 | 7    | 106<br>cotranslational protein targeting to membrane                         |
| GO:0045047 | 2.78E-11 |           | 92.13774105 | 0.132032385 | 7    | 106<br>protein targeting to ER                                               |
| GO:0072599 | 2.78E-11 |           | 92.13774105 | 0.132032385 | 7    | 106<br>establishment of protein localization to endoplasmic reticulum        |
| GO:0072594 | 5.33E-11 |           | 58.11020408 | 0.254100062 | 8    | 204<br>establishment of protein localization to organelle                    |
| GO:0070972 | 5.97E-11 |           | 82.10810811 | 0.146979448 | 7    | 118<br>protein localization to endoplasmic reticulum                         |
| GO:0000184 | 6.34E-11 |           | 81.36931818 | 0.148225036 | 7    | 119<br>"nuclear-transcribed mRNA catabolic process, nonsense-mediated decay" |
| GO:0019080 | 3.42E-10 |           | 63.14583333 | 0.18808387  | 7    | 151<br>viral genome expression                                               |

STable4\_20PerPair

|                                                  |          |             |             |   |     |      |
|--------------------------------------------------|----------|-------------|-------------|---|-----|------|
| GO:0019083                                       | 3.42E-10 | 63.14583333 | 0.18808387  | 7 | 151 |      |
| viral transcription                              |          |             |             |   |     |      |
| GO:0006413                                       | 3.58E-10 | 62.70595611 | 0.189329458 | 7 | 152 |      |
| translational initiation                         |          |             |             |   |     |      |
| GO:0006612                                       | 3.75E-10 | 62.27210461 | 0.190575047 | 7 | 153 |      |
| protein targeting to membrane                    |          |             |             |   |     |      |
| GO:0043624                                       | 3.75E-10 | 62.27210461 | 0.190575047 | 7 | 153 |      |
| cellular protein complex disassembly             |          |             |             |   |     |      |
| GO:0043241                                       | 4.70E-10 | 60.18904275 | 0.196802989 | 7 | 158 |      |
| protein complex disassembly                      |          |             |             |   |     |      |
| GO:0000956                                       | 7.54E-10 | 56.05892256 | 0.210504463 | 7 | 169 |      |
| nuclear-transcribed mRNA catabolic process       |          |             |             |   |     |      |
| GO:0034623                                       | 9.25E-10 | 54.3614589  | 0.216732406 | 7 | 174 |      |
| cellular macromolecular complex disassembly      |          |             |             |   |     |      |
| GO:0006402                                       | 1.09E-09 | 53.07496013 | 0.22171476  | 7 | 178 | mRNA |
| catabolic process                                |          |             |             |   |     |      |
| GO:0032984                                       | 1.13E-09 | 52.76268499 | 0.222960349 | 7 | 179 |      |
| macromolecular complex disassembly               |          |             |             |   |     |      |
| GO:0033365                                       | 1.50E-09 | 30.10560345 | 0.58916338  | 9 | 473 |      |
| protein localization to organelle                |          |             |             |   |     |      |
| GO:0006605                                       | 1.52E-09 | 30.03870968 | 0.590408968 | 9 | 474 |      |
| protein targeting                                |          |             |             |   |     |      |
| GO:0006401                                       | 2.91E-09 | 45.75068871 | 0.255345651 | 7 | 205 | RNA  |
| catabolic process                                |          |             |             |   |     |      |
| GO:0019058                                       | 6.67E-09 | 40.36647727 | 0.287730953 | 7 | 231 |      |
| viral infectious cycle                           |          |             |             |   |     |      |
| GO:0022415                                       | 1.51E-08 | 35.66654689 | 0.323853021 | 7 | 260 |      |
| viral reproductive process                       |          |             |             |   |     |      |
| GO:0071845                                       | 2.78E-08 | 32.52116836 | 0.353747146 | 7 | 284 |      |
| cellular component disassembly at cellular level |          |             |             |   |     |      |
| GO:0022411                                       | 3.06E-08 | 32.04917502 | 0.3587295   | 7 | 288 |      |
| cellular component disassembly                   |          |             |             |   |     |      |

STable4\_20PerPair

GO:0016032 6.50E-07 20.0497543 0.561760432 7 451  
viral reproduction

Tissue: Lung=>Heart\_Left\_Ventricle Type: asymmetric

SourceGene: CTD-2224J9.8(ENSG00000213777.4)  
TargetGeneSet: KIF17 AK2 MRPL37 USP24 ATP5F1 FH BOLA3 COX5B  
UBE2F HIGD1A VPRBP CHMP2B RP11 TMEM14E RPL39L NDUFS6 NDFIP1 RP1 COQ3  
SEC61G STAG3L4 PTK2B CYC1 NDUFB6 ATP5C1 SEMA4G GLRX3 MACROD1 SSSCA1 FIBP  
NDUFS8 PTS RAPGEF3 SMARCC2 RPL6 SALL2 COX16 ANGEL1 CDC42BPB  
C15orf29 TPM1 RPL4 SIN3A CTD NDUFB10 DCTPP1 TXNDC17 RPL17P43  
PCGF2 NDUFV2 NDUFS7 UQCR11 MRPL4 NDUFB7 TIMM50 ZNF765 YWHAB NCOA3  
FOXO4

| GOBPID     | Pvalue | OddsRatio            | ExpCount         | Count | Size | Term                                                   |
|------------|--------|----------------------|------------------|-------|------|--------------------------------------------------------|
| GO:0022904 | 12     | 7.75203118275651e-16 | 49.8745644599303 |       |      | 0.352086360805481                                      |
|            | 96     |                      |                  |       |      | respiratory electron transport chain                   |
| GO:0045333 | 13     | 2.74000707798801e-15 | 35.9490310077519 |       |      | 0.52079440869144                                       |
|            | 142    |                      |                  |       |      | cellular respiration                                   |
| GO:0022900 | 12     | 4.72993834892767e-14 | 34.2487005197921 |       |      | 0.491453878624317                                      |
|            | 134    |                      |                  |       |      | electron transport chain                               |
| GO:0015980 | 14     | 3.24049693201275e-12 | 17.2810011376564 |       |      | 1.12594284132586                                       |
|            | 307    |                      |                  |       |      | energy derivation by oxidation of organic compounds    |
| GO:0006119 | 8      | 3.14111757666897e-11 | 51.0151111111111 |       |      | 0.212718842986645                                      |
|            | 58     |                      |                  |       |      | oxidative phosphorylation                              |
| GO:0006120 | 7      | 4.55106132982168e-11 | 75.3995502248876 |       |      | 0.132032385302055                                      |
|            | 36     |                      |                  |       |      | mitochondrial electron transport, NADH to ubiquinone   |
| GO:0006091 | 428    | 2.71045007873877e-10 | 12.1253561253561 |       |      | 1.5697183585911 14                                     |
|            |        |                      |                  |       |      | generation of precursor metabolites and energy         |
| GO:0042773 | 7      | 3.32506633580914e-10 | 54.6228260869565 |       |      | 0.17237561414435                                       |
|            | 47     |                      |                  |       |      | ATP synthesis coupled electron transport               |
| GO:0042775 | 7      | 3.32506633580914e-10 | 54.6228260869565 |       |      | 0.17237561414435                                       |
|            | 47     |                      |                  |       |      | mitochondrial ATP synthesis coupled electron transport |

Tissue: Heart\_Left\_Ventricle=>Lung Type: asymmetric

SourceGene: GCC2(ENSG00000135968.13) GRIP and coiled-coil domain  
containing 2

TargetGeneSet: 7SK BRD8 FCER1A CEP350 TSEN15 PLB1 EHD3 IL1R2  
EAF1-AS1 BCL6 RP11 SULT1B1 HSP90AB3P EDNRA TLR2 RNF175 NAIP  
PCDHA3 SH3PXD2B DRD1 C6orf1 FKBP5 ARMC12 RAB23 WASF1 GUCY2C  
FBXO32 TLR4 SUPV3L1 CHST3 ABCC2 HRAS TMEM223 ZBTB16 NNMT RP1  
IRAK3 UBE3A ST20 MT1M MT1JP MT1A MYO1C CANT1 PSTPIP2 C19orf35  
ITPKC GRIK5 FPR2 VN1R1 SEC14L2 RP3 WNK3 PCDH11X TSC22D3

| GOBPID | Pvalue | OddsRatio | ExpCount | Count | Size | Term |
|--------|--------|-----------|----------|-------|------|------|
|--------|--------|-----------|----------|-------|------|------|

GO:0061082 9.06E-08 134.2377622 0.044633589 4 15

STable4\_20PerPair

myeloid leukocyte cytokine production

GO:0010934 2.90E-06 154.2964286 0.029755726 3 10  
macrophage cytokine production

GO:0010935 2.90E-06 154.2964286 0.029755726 3 10  
regulation of macrophage cytokine production

GO:0002718 4.66E-06 43.36048265 0.11307176 4 38  
regulation of cytokine production involved in immune response

GO:0002367 7.71E-06 37.78829717 0.127949623 4 43  
cytokine production involved in immune response

Tissue: Lung=>Heart\_Left\_Ventricle Type: asymmetric

SourceGene: GCKR(ENSG00000084734.4) "glucokinase (hexokinase 4) regulator (is expressed mainly in liver, but also in lung, funtion unknown)"

STable4\_20PerPair

|                |          |         |        |          |           |         |         |         |        |      |
|----------------|----------|---------|--------|----------|-----------|---------|---------|---------|--------|------|
| TargetGeneSet: | CAPZB    | PLA2G2A | CDA    | ASAP3    | FGR       | COL16A1 | CYR61   | ST7L    |        |      |
| PSMB4          | SLC39A1  | EFNA4   | EFNA1  | RP11     | FAM189B   | LMNA    | CRABP2  | PTGS2   | CALM2  |      |
| ANTXR1         | STEAP3   | TNFAIP6 | PSMD14 | LIPA     | FRZB      | COL3A1  | COL5A2  | KANSL1L | FN1    |      |
| PSMD1          | COL6A3   | MTMR14  | TRANK1 | PTH1R    | COL8A1    | ABI3BP  | CCDC80  | GAP43   | KLF15  | SKIL |
| SPON2          | KIT      | 11-Sep  | UNC5C  | PDE5A    | LPCAT1    | SUB1    | RAI14   | PTGER4  | CTD    |      |
| KLHL35         | LHFPL2   | PPP2CA  | PHF15  | MATR3    | SPARC     | CTB     | HK3     | DTNBP1  | RBM24  |      |
| MOCS1          | MTO1     | USP45   | TCF21  | LFNG     | CYTH3     | 7-Sep   | SFRP4   | YKT6    | COL1A2 | ECD  |
| PDAP1          | SLC12A9  | ZNHIT1  | NAMPT  | DYNLL1   | TNFRSF10C |         | EBF2    | TRPA1   | SDC2   |      |
| YWHAZ          | COL14A1  | FREM1   | OGN    | OMD      | ASPN      | ECM2    | PTCH1   | PSMB7   | COL5A1 |      |
| ITIH5          | FAM107B  | KAZALD1 | ADAM12 | NRXN2    | RIN1      | TEAD4   | NTN4    | EMP1    | MGP    |      |
| STK38L         | C12orf35 |         | TENC1  | LUM      | GLT8D2    | CMKLR1  | TMEM119 | AP1G2   | LRFN5  |      |
| COX16          | DIO2     | CILP    | FEM1B  | ISLR     | SCAMP2    | WDR61   | FAM174B | MRPL28  | PPL    | CDR2 |
| MMP2           | PDP2     | SLC9A5  | WDR81  | RASL10B  | CCR7      | STAT3   | NBR2    | COPZ2   | COL1A1 |      |
| MTMR4          | MRC2     | RHBDF2  | PRCD   | C17orf62 |           | GALNT1  | DSEL    | MOB3A   | KRI1   | LSM4 |
| U2AF1L4        | PSMC4    | CLEC11A | ZNF766 | ZNF600   | ZNF845    | ZNF525  | CHMP2A  | MZF1    | ZNF341 |      |
| PTPRT          | HSPA13   | CBS     | COL6A1 | COL6A2   | TPST2     | MN1     | MFNG    | ATP6AP2 | TCEAL4 | NRK  |
| CAPN6          | PLS3     | PGRMC1  |        |          |           |         |         |         |        |      |

|        |        |           |          |       |      |      |
|--------|--------|-----------|----------|-------|------|------|
| GOBPID | Pvalue | OddsRatio | ExpCount | Count | Size | Term |
|--------|--------|-----------|----------|-------|------|------|

|                             |          |  |             |             |   |    |
|-----------------------------|----------|--|-------------|-------------|---|----|
| GO:0070208                  | 1.32E-10 |  | 163.8549618 | 0.094803128 | 6 | 10 |
| protein heterotrimerization |          |  |             |             |   |    |

|                                   |          |  |             |             |    |     |
|-----------------------------------|----------|--|-------------|-------------|----|-----|
| GO:0030198                        | 3.73E-10 |  | 10.96941541 | 1.526330358 | 14 | 161 |
| extracellular matrix organization |          |  |             |             |    |     |

STable4\_20PerPair

|                                      |          |             |             |    |     |
|--------------------------------------|----------|-------------|-------------|----|-----|
| GO:0043062                           | 4.05E-10 | 10.89452868 | 1.535810671 | 14 | 162 |
| extracellular structure organization |          |             |             |    |     |

|                              |          |             |             |   |    |
|------------------------------|----------|-------------|-------------|---|----|
| GO:0030199                   | 2.05E-08 | 29.59053254 | 0.312850322 | 7 | 33 |
| collagen fibril organization |          |             |             |   |    |

|                                          |          |             |             |   |    |
|------------------------------------------|----------|-------------|-------------|---|----|
| GO:0071230                               | 3.18E-08 | 27.47307692 | 0.331810947 | 7 | 35 |
| cellular response to amino acid stimulus |          |             |             |   |    |

STable4\_20PerPair

|                                     |          |             |             |    |     |
|-------------------------------------|----------|-------------|-------------|----|-----|
| GO:0051291                          | 5.15E-08 | 18.43152455 | 0.530897516 | 8  | 56  |
| protein heterooligomerization       |          |             |             |    |     |
| GO:0071229                          | 1.01E-07 | 22.61538462 | 0.388692824 | 7  | 41  |
| cellular response to acid           |          |             |             |    |     |
| GO:0071418                          | 4.20E-07 | 17.8706619  | 0.474015639 | 7  | 50  |
| cellular response to amine stimulus |          |             |             |    |     |
| GO:0031589                          | 4.84E-07 | 7.136336842 | 1.915023182 | 12 | 202 |
| cell-substrate adhesion             |          |             |             |    |     |

STable4\_20PerPair

|                                       |          |             |             |   |    |
|---------------------------------------|----------|-------------|-------------|---|----|
| GO:0071417                            | 5.53E-07 | 17.07401709 | 0.492976265 | 7 | 52 |
| cellular response to organic nitrogen |          |             |             |   |    |

|                       |          |             |             |   |    |
|-----------------------|----------|-------------|-------------|---|----|
| GO:0070206            | 5.84E-07 | 24.23579304 | 0.312850322 | 6 | 33 |
| protein trimerization |          |             |             |   |    |

|                  |          |             |             |   |    |
|------------------|----------|-------------|-------------|---|----|
| GO:0001101       | 1.38E-06 | 11.46642505 | 0.805826586 | 8 | 85 |
| response to acid |          |             |             |   |    |

|              |          |             |           |    |     |
|--------------|----------|-------------|-----------|----|-----|
| GO:0001503   | 1.46E-06 | 5.826628841 | 2.5217632 | 13 | 266 |
| ossification |          |             |           |    |     |



STable4\_20PerPair

|                             |          |             |             |    |     |
|-----------------------------|----------|-------------|-------------|----|-----|
| GO:0001501                  | 1.57E-06 | 4.993089973 | 3.403432288 | 15 | 359 |
| skeletal system development |          |             |             |    |     |

|                                 |          |             |             |   |    |
|---------------------------------|----------|-------------|-------------|---|----|
| GO:0043200                      | 2.60E-06 | 13.23501326 | 0.616220331 | 7 | 65 |
| response to amino acid stimulus |          |             |             |   |    |

|                                                |          |             |             |   |    |
|------------------------------------------------|----------|-------------|-------------|---|----|
| GO:0010811                                     | 6.51E-06 | 15.20078111 | 0.464535326 | 6 | 49 |
| positive regulation of cell-substrate adhesion |          |             |             |   |    |

|            |          |             |             |   |   |
|------------|----------|-------------|-------------|---|---|
| GO:0001957 | 1.63E-05 | 106.7985075 | 0.056881877 | 3 | 6 |
|------------|----------|-------------|-------------|---|---|

intramembranous ossification

STable4\_20PerPair

GO:0036072 1.63E-05 106.7985075 0.056881877 3 6  
direct ossification

Tissue: Lung=>Heart\_Left\_Ventricle Type: asymmetric

SourceGene: HS3ST6(ENSG00000162040.5) heparan sulfate (glucosamine)  
3-O-sulfotransferase 6

|                |        |           |          |           |          |         |          |            |        |
|----------------|--------|-----------|----------|-----------|----------|---------|----------|------------|--------|
| TargetGeneSet: | CAPZB  | ZFYVE9    | PSMA5    | RPRD2     | PSMB4    | PMF1    | SLC30A10 | MIA3       |        |
| FAM110C        | NBAS   | COMMD1    | PSMD14   | ARPC2     | SNED1    | GALNTL2 | SLC12A8  | PIK3CB     | PHF17  |
| PHF15          | SPARC  | DTNBP1    | KIAA1009 |           | ECD      | MEPCE   | ZNHIT1   | ATXN7L1    | ADCK2  |
| MIR939         | NFX1   | ECM2      | MSANTD3  | ZFP37     | CDK5RAP2 |         | PSMB7    | ST6GALNAC6 |        |
| COL5A1         | WAC    | TM9SF3    | SLC43A1  | DYNC2H1   | NPAT     | SCN4B   | NTN4     | MPHOSPH8   |        |
| PSMB5          | PSME2  | C14orf149 |          | CILP      | MRPL28   | PPL     | HSD11B2  | DEF8       | EZH1   |
| RPL27          | LLGL2  | SRSF2     | MYL12B   | CDC37     | PDCD5    | PSMC4   | ZNF615   | ZNF766     | ZNF845 |
| ZNF525         | ZNF329 | CSRP2BP   | PHF20    | EIF4ENIF1 |          | RIPPLY1 | KIAA1210 |            | HMGB3  |

| GOBPID | Pvalue | OddsRatio | ExpCount | Count | Size | Term |
|--------|--------|-----------|----------|-------|------|------|
|--------|--------|-----------|----------|-------|------|------|

STable4\_20PerPair

|                                                                                            |          |             |             |   |    |      |
|--------------------------------------------------------------------------------------------|----------|-------------|-------------|---|----|------|
| GO:0006521                                                                                 | 2.95E-09 | 38.61307692 | 0.232717459 | 7 | 57 |      |
| regulation of cellular amino acid metabolic process                                        |          |             |             |   |    |      |
| GO:0006977                                                                                 | 8.46E-09 | 32.70241199 | 0.269462321 | 7 | 66 | "DNA |
| damage response, signal transduction by p53 class mediator resulting in cell cycle arrest" |          |             |             |   |    |      |
| GO:0072413                                                                                 | 8.46E-09 | 32.70241199 | 0.269462321 | 7 | 66 |      |
| signal transduction involved in mitotic cell cycle checkpoint                              |          |             |             |   |    |      |
| GO:0072431                                                                                 | 8.46E-09 | 32.70241199 | 0.269462321 | 7 | 66 |      |
| signal transduction involved in mitotic cell cycle G1/S transition DNA damage checkpoint   |          |             |             |   |    |      |
| GO:0072474                                                                                 | 8.46E-09 | 32.70241199 | 0.269462321 | 7 | 66 |      |
| signal transduction involved in mitotic cell cycle G1/S checkpoint                         |          |             |             |   |    |      |
| GO:0051436                                                                                 | 9.42E-09 | 32.15512821 | 0.273545083 | 7 | 67 |      |
| negative regulation of ubiquitin-protein ligase activity involved in mitotic cell cycle    |          |             |             |   |    |      |
| GO:0072401                                                                                 | 9.42E-09 | 32.15512821 | 0.273545083 | 7 | 67 |      |
| signal transduction involved in DNA integrity checkpoint                                   |          |             |             |   |    |      |

STable4\_20PerPair

|                                                                                         |          |             |             |   |    |
|-----------------------------------------------------------------------------------------|----------|-------------|-------------|---|----|
| GO:0072404                                                                              | 9.42E-09 | 32.15512821 | 0.273545083 | 7 | 67 |
| signal transduction involved in G1/S transition checkpoint                              |          |             |             |   |    |
| GO:0072422                                                                              | 9.42E-09 | 32.15512821 | 0.273545083 | 7 | 67 |
| signal transduction involved in DNA damage checkpoint                                   |          |             |             |   |    |
| GO:0072395                                                                              | 1.05E-08 | 31.62578815 | 0.277627846 | 7 | 68 |
| signal transduction involved in cell cycle checkpoint                                   |          |             |             |   |    |
| GO:0033238                                                                              | 1.57E-08 | 29.67130178 | 0.293958896 | 7 | 72 |
| regulation of cellular amine metabolic process                                          |          |             |             |   |    |
| GO:0051352                                                                              | 1.57E-08 | 29.67130178 | 0.293958896 | 7 | 72 |
| negative regulation of ligase activity                                                  |          |             |             |   |    |
| GO:0051437                                                                              | 1.57E-08 | 29.67130178 | 0.293958896 | 7 | 72 |
| positive regulation of ubiquitin-protein ligase activity involved in mitotic cell cycle |          |             |             |   |    |
| GO:0051444                                                                              | 1.57E-08 | 29.67130178 | 0.293958896 | 7 | 72 |
| negative regulation of ubiquitin-protein ligase activity                                |          |             |             |   |    |

STable4\_20PerPair

|                                                                                                   |          |             |             |   |    |      |
|---------------------------------------------------------------------------------------------------|----------|-------------|-------------|---|----|------|
| GO:0031571                                                                                        | 1.73E-08 | 29.21969697 | 0.298041658 | 7 | 73 |      |
| mitotic cell cycle G1/S transition DNA damage checkpoint                                          |          |             |             |   |    |      |
| GO:0002479                                                                                        | 2.10E-08 | 28.35633484 | 0.306207183 | 7 | 75 |      |
| "antigen processing and presentation of exogenous peptide antigen via MHC class I, TAP-dependent" |          |             |             |   |    |      |
| GO:0051439                                                                                        | 2.76E-08 | 27.15249187 | 0.31845547  | 7 | 78 |      |
| regulation of ubiquitin-protein ligase activity involved in mitotic cell cycle                    |          |             |             |   |    |      |
| GO:0000216                                                                                        | 3.02E-08 | 26.77350427 | 0.322538233 | 7 | 79 | M/G1 |
| transition of mitotic cell cycle                                                                  |          |             |             |   |    |      |
| GO:0042590                                                                                        | 3.02E-08 | 26.77350427 | 0.322538233 | 7 | 79 |      |
| antigen processing and presentation of exogenous peptide antigen via MHC class I                  |          |             |             |   |    |      |
| GO:0071158                                                                                        | 3.30E-08 | 26.40489989 | 0.326620995 | 7 | 80 |      |
| positive regulation of cell cycle arrest                                                          |          |             |             |   |    |      |
| GO:0031575                                                                                        | 3.93E-08 | 25.69717949 | 0.33478652  | 7 | 82 |      |
| mitotic cell cycle G1/S transition checkpoint                                                     |          |             |             |   |    |      |

STable4\_20PerPair

|                                                                                                |          |             |             |   |     |      |
|------------------------------------------------------------------------------------------------|----------|-------------|-------------|---|-----|------|
| GO:0051443                                                                                     | 3.93E-08 | 25.69717949 | 0.33478652  | 7 | 82  |      |
| positive regulation of ubiquitin-protein ligase activity                                       |          |             |             |   |     |      |
| GO:0002478                                                                                     | 4.27E-08 | 25.35728745 | 0.338869282 | 7 | 83  |      |
| antigen processing and presentation of exogenous peptide antigen                               |          |             |             |   |     |      |
| GO:0031145                                                                                     | 4.27E-08 | 25.35728745 | 0.338869282 | 7 | 83  |      |
| anaphase-promoting complex-dependent proteasomal ubiquitin-dependent protein catabolic process |          |             |             |   |     |      |
| GO:0031398                                                                                     | 4.34E-08 | 18.81430219 | 0.51851083  | 8 | 127 |      |
| positive regulation of protein ubiquitination                                                  |          |             |             |   |     |      |
| GO:0019884                                                                                     | 5.05E-08 | 24.70364892 | 0.347034807 | 7 | 85  |      |
| antigen processing and presentation of exogenous antigen                                       |          |             |             |   |     |      |
| GO:0051351                                                                                     | 5.48E-08 | 24.38924051 | 0.35111757  | 7 | 86  |      |
| positive regulation of ligase activity                                                         |          |             |             |   |     |      |
| GO:0071779                                                                                     | 5.48E-08 | 24.38924051 | 0.35111757  | 7 | 86  | G1/S |
| transition checkpoint                                                                          |          |             |             |   |     |      |

STable4\_20PerPair

|                                                                        |          |             |             |   |     |             |
|------------------------------------------------------------------------|----------|-------------|-------------|---|-----|-------------|
| GO:0031397                                                             | 8.76E-08 | 22.6581448  | 0.375614144 | 7 | 92  |             |
| negative regulation of protein ubiquitination                          |          |             |             |   |     |             |
| GO:0051438                                                             | 1.18E-07 | 21.63375108 | 0.391945194 | 7 | 96  |             |
| regulation of ubiquitin-protein ligase activity                        |          |             |             |   |     |             |
| GO:0002474                                                             | 1.46E-07 | 20.92391304 | 0.404193481 | 7 | 99  |             |
| antigen processing and presentation of peptide antigen via MHC class I |          |             |             |   |     |             |
| GO:2000045                                                             | 1.46E-07 | 20.92391304 | 0.404193481 | 7 | 99  |             |
| regulation of G1/S transition of mitotic cell cycle                    |          |             |             |   |     |             |
| GO:0051340                                                             | 1.56E-07 | 20.69747725 | 0.408276244 | 7 | 100 |             |
| regulation of ligase activity                                          |          |             |             |   |     |             |
| GO:0043161                                                             | 1.57E-07 | 12.7728     | 0.85329735  | 9 | 209 | proteasomal |
| ubiquitin-dependent protein catabolic process                          |          |             |             |   |     |             |
| GO:0010498                                                             | 2.07E-07 | 12.33478261 | 0.881876687 | 9 | 216 |             |
| proteasomal protein catabolic process                                  |          |             |             |   |     |             |

STable4\_20PerPair

|                                                             |          |             |             |   |     |      |
|-------------------------------------------------------------|----------|-------------|-------------|---|-----|------|
| GO:0048002                                                  | 2.65E-07 | 19.04741051 | 0.440938343 | 7 | 108 |      |
| antigen processing and presentation of peptide antigen      |          |             |             |   |     |      |
| GO:0031396                                                  | 3.78E-07 | 13.95294118 | 0.68590409  | 8 | 168 |      |
| regulation of protein ubiquitination                        |          |             |             |   |     |      |
| GO:0030330                                                  | 4.59E-07 | 17.47797203 | 0.477683205 | 7 | 117 | "DNA |
| damage response, signal transduction by p53 class mediator" |          |             |             |   |     |      |
| GO:0000075                                                  | 5.41E-07 | 10.93828326 | 0.98802851  | 9 | 242 | cell |
| cycle checkpoint                                            |          |             |             |   |     |      |
| GO:0072331                                                  | 6.44E-07 | 16.56697613 | 0.50217978  | 7 | 123 |      |
| signal transduction by p53 class mediator                   |          |             |             |   |     |      |
| GO:0000082                                                  | 8.20E-07 | 12.52610707 | 0.759393814 | 8 | 186 | G1/S |
| transition of mitotic cell cycle                            |          |             |             |   |     |      |
| GO:0000077                                                  | 9.37E-07 | 15.61647905 | 0.530759117 | 7 | 130 | DNA  |
| damage checkpoint                                           |          |             |             |   |     |      |



STable4\_20PerPair

|                                                |          |             |             |   |     |     |
|------------------------------------------------|----------|-------------|-------------|---|-----|-----|
| GO:0071156                                     | 1.12E-06 | 9.979058824 | 1.077849284 | 9 | 264 |     |
| regulation of cell cycle arrest                |          |             |             |   |     |     |
| GO:0000084                                     | 1.15E-06 | 15.12038159 | 0.547090167 | 7 | 134 | S   |
| phase of mitotic cell cycle                    |          |             |             |   |     |     |
| GO:0031570                                     | 1.27E-06 | 14.88387001 | 0.555255692 | 7 | 136 | DNA |
| integrity checkpoint                           |          |             |             |   |     |     |
| GO:0007093                                     | 1.47E-06 | 14.54254079 | 0.567503979 | 7 | 139 |     |
| mitotic cell cycle checkpoint                  |          |             |             |   |     |     |
| GO:0042770                                     | 1.54E-06 | 14.43218623 | 0.571586741 | 7 | 140 |     |
| signal transduction in response to DNA damage  |          |             |             |   |     |     |
| GO:0051320                                     | 1.78E-06 | 14.11085973 | 0.583835029 | 7 | 143 | S   |
| phase                                          |          |             |             |   |     |     |
| GO:2000602                                     | 2.14E-06 | 13.70384615 | 0.600166078 | 7 | 147 |     |
| regulation of interphase of mitotic cell cycle |          |             |             |   |     |     |

STable4\_20PerPair

|                                                 |          |             |             |   |     |
|-------------------------------------------------|----------|-------------|-------------|---|-----|
| GO:0090068                                      | 2.56E-06 | 13.31944444 | 0.616497128 | 7 | 151 |
| positive regulation of cell cycle process       |          |             |             |   |     |
| GO:0019882                                      | 2.68E-06 | 13.22665782 | 0.620579891 | 7 | 152 |
| antigen processing and presentation             |          |             |             |   |     |
| GO:0010565                                      | 2.92E-06 | 13.04487179 | 0.628745416 | 7 | 154 |
| regulation of cellular ketone metabolic process |          |             |             |   |     |
| GO:0000209                                      | 3.92E-06 | 12.4458042  | 0.657324753 | 7 | 161 |
| protein polyubiquitination                      |          |             |             |   |     |
| GO:0044106                                      | 9.11E-06 | 10.87325175 | 0.747145526 | 7 | 183 |
| cellular amine metabolic process                |          |             |             |   |     |
| GO:0006511                                      | 1.53E-05 | 7.117352113 | 1.486125528 | 9 | 364 |
| ubiquitin-dependent protein catabolic process   |          |             |             |   |     |
| GO:0009308                                      | 1.73E-05 | 9.800690335 | 0.824718013 | 7 | 202 |
| amine metabolic process                         |          |             |             |   |     |

STable4\_20PerPair

GO:0019941 1.78E-05 6.976243094 1.514704865 9 371  
 modification-dependent protein catabolic process

GO:0043632 1.89E-05 6.917424658 1.526953152 9 374  
 modification-dependent macromolecule catabolic process

Tissue: Heart\_Left\_Ventricle=>Lung Type: asymmetric

SourceGene: KIAA1797(ENSG00000188352.7) FOCAD focadhesin

TargetGeneSet: RPL11 RP4 RP11 RPL5 U1 UBC RPL31 EEF1A1P12  
 CYBRD1 TMEFF2 RPL37A RPL32 RPL15 RPL24 RPL35A RPL34 CTD RPL37  
 EEF1A1P19 RPS14 RPL24P4 MRPS12 TRBV6-1 RPS20 RPL30 RPS6 STRA13 7SK  
 RPL13AP5 RPS13 FAU C12orf57 AMHR2 NACA RPL14P1 RPL3P4 U4  
 RPLP1 RPL26 MFAP4 RPL19 RPL27 RPS15 RPL18A RPS16 FBL ZNF574  
 RPL18 RPL13A RPS9 KIR3DX1 RPL28 RPS5 INSM1 RPS21 H2BFS RPL3  
 SLC25A6 EEF1B2P3 RPS23P8 RP3 RPL10

GOBPID Pvalue OddsRatio ExpCount Count Size Term

GO:0006415 1.75E-62 555.7772397 0.289668535 32 91  
 translational termination

|                                                                       |          | STable4_20PerPair |             |    |     |
|-----------------------------------------------------------------------|----------|-------------------|-------------|----|-----|
| GO:0006414                                                            | 4.28E-60 | 448.7514677       | 0.334232925 | 32 | 105 |
| translational elongation                                              |          |                   |             |    |     |
| GO:0006614                                                            | 4.28E-60 | 448.7514677       | 0.334232925 | 32 | 105 |
| SRP-dependent cotranslational protein targeting to membrane           |          |                   |             |    |     |
| GO:0006613                                                            | 6.13E-60 | 442.6563707       | 0.337416096 | 32 | 106 |
| cotranslational protein targeting to membrane                         |          |                   |             |    |     |
| GO:0045047                                                            | 6.13E-60 | 442.6563707       | 0.337416096 | 32 | 106 |
| protein targeting to ER                                               |          |                   |             |    |     |
| GO:0072599                                                            | 6.13E-60 | 442.6563707       | 0.337416096 | 32 | 106 |
| establishment of protein localization to endoplasmic reticulum        |          |                   |             |    |     |
| GO:0070972                                                            | 3.38E-58 | 380.5714286       | 0.375614144 | 32 | 118 |
| protein localization to endoplasmic reticulum                         |          |                   |             |    |     |
| GO:0000184                                                            | 4.62E-58 | 376.1707718       | 0.378797315 | 32 | 119 |
| "nuclear-transcribed mRNA catabolic process, nonsense-mediated decay" |          |                   |             |    |     |
| GO:0019080                                                            | 2.62E-54 | 274.4009604       | 0.480658778 | 32 | 151 |
| viral genome expression                                               |          |                   |             |    |     |

STable4\_20PerPair

|                                                    |          |             |             |    |     |
|----------------------------------------------------|----------|-------------|-------------|----|-----|
| GO:0019083                                         | 2.62E-54 | 274.4009604 | 0.480658778 | 32 | 151 |
| viral transcription                                |          |             |             |    |     |
| GO:0006413                                         | 3.32E-54 | 272.0952381 | 0.483841949 | 32 | 152 |
| translational initiation                           |          |             |             |    |     |
| GO:0006612                                         | 4.19E-54 | 269.8276269 | 0.487025119 | 32 | 153 |
| protein targeting to membrane                      |          |             |             |    |     |
| GO:0043624                                         | 4.19E-54 | 269.8276269 | 0.487025119 | 32 | 153 |
| cellular protein complex disassembly               |          |             |             |    |     |
| GO:0043241                                         | 1.32E-53 | 259.0294785 | 0.502940973 | 32 | 158 |
| protein complex disassembly                        |          |             |             |    |     |
| GO:0000956                                         | 1.42E-52 | 238.0479666 | 0.537955851 | 32 | 169 |
| nuclear-transcribed mRNA catabolic process         |          |             |             |    |     |
| GO:0034623                                         | 3.95E-52 | 229.5855131 | 0.553871704 | 32 | 174 |
| cellular macromolecular complex disassembly        |          |             |             |    |     |
| GO:0072594                                         | 5.13E-52 | 211.3009447 | 0.649366826 | 33 | 204 |
| establishment of protein localization to organelle |          |             |             |    |     |

STable4\_20PerPair

|                                                  |          |             |             |    |     |      |
|--------------------------------------------------|----------|-------------|-------------|----|-----|------|
| GO:0006402                                       | 8.77E-52 | 223.2328767 | 0.566604387 | 32 | 178 | mRNA |
| catabolic process                                |          |             |             |    |     |      |
| GO:0032984                                       | 1.07E-51 | 221.6987366 | 0.569787558 | 32 | 179 |      |
| macromolecular complex disassembly               |          |             |             |    |     |      |
| GO:0019058                                       | 4.24E-50 | 182.1410256 | 0.735312435 | 33 | 231 |      |
| viral infectious cycle                           |          |             |             |    |     |      |
| GO:0006401                                       | 1.19E-49 | 188.0363336 | 0.652549997 | 32 | 205 | RNA  |
| catabolic process                                |          |             |             |    |     |      |
| GO:0022415                                       | 2.71E-48 | 158.547611  | 0.827624386 | 33 | 260 |      |
| viral reproductive process                       |          |             |             |    |     |      |
| GO:0071845                                       | 7.80E-45 | 128.3718821 | 0.904020483 | 32 | 284 |      |
| cellular component disassembly at cellular level |          |             |             |    |     |      |
| GO:0022411                                       | 1.25E-44 | 126.3303571 | 0.916753166 | 32 | 288 |      |
| cellular component disassembly                   |          |             |             |    |     |      |
| GO:0016032                                       | 4.49E-40 | 84.94129555 | 1.435609992 | 33 | 451 |      |
| viral reproduction                               |          |             |             |    |     |      |

STable4\_20PerPair

|                                                 |          |             |             |    |     |      |
|-------------------------------------------------|----------|-------------|-------------|----|-----|------|
| GO:0033365                                      | 2.24E-39 | 80.56730769 | 1.505639748 | 33 | 473 |      |
| protein localization to organelle               |          |             |             |    |     |      |
| GO:0006605                                      | 2.41E-39 | 80.37885924 | 1.508822919 | 33 | 474 |      |
| protein targeting                               |          |             |             |    |     |      |
| GO:0006364                                      | 7.88E-13 | 42.29018913 | 0.331049754 | 10 | 104 | rRNA |
| processing                                      |          |             |             |    |     |      |
| GO:0016072                                      | 1.40E-12 | 39.73611111 | 0.350148779 | 10 | 110 | rRNA |
| metabolic process                               |          |             |             |    |     |      |
| GO:0042254                                      | 2.97E-11 | 28.50919265 | 0.474292437 | 10 | 149 |      |
| ribosome biogenesis                             |          |             |             |    |     |      |
| GO:0022613                                      | 8.44E-11 | 20.84125501 | 0.716213411 | 11 | 225 |      |
| ribonucleoprotein complex biogenesis            |          |             |             |    |     |      |
| GO:0071843                                      | 1.61E-10 | 19.54223058 | 0.760777801 | 11 | 239 |      |
| cellular component biogenesis at cellular level |          |             |             |    |     |      |
| GO:0034470                                      | 5.44E-10 | 20.78216374 | 0.636634143 | 10 | 200 |      |
| ncRNA processing                                |          |             |             |    |     |      |

STable4\_20PerPair

GO:0042274 2.17E-09 135.0093809 0.057297073 5 18  
 ribosomal small subunit biogenesis

GO:0034660 1.66E-08 14.27272727 0.907203654 10 285  
 ncRNA metabolic process

GO:0042273 4.37E-08 171.3928571 0.038198049 4 12  
 ribosomal large subunit biogenesis

Tissue: Heart\_Left\_Ventricle=>Lung Type: cluster

| SourceGene: | TargetGeneSet: | FAM87B    | TTC34                         | H6PD             | PRDX3P2          | LCK              | CDC20   | ATG4C    | LEPROT  |
|-------------|----------------|-----------|-------------------------------|------------------|------------------|------------------|---------|----------|---------|
| LRRC39      | NRAS           | GAPDHP32  | JTB                           | PYG02            | IQGAP3           | RP11             | B4GALT3 | POU2F1   |         |
| C1orf106    |                | SH3YL1    | DHX57                         | STAMBP           | PCGF1            | IMMT             | TMEM127 | CKAP2L   | TANC1   |
| C2orf77     | CCDC150        | ALS2CR8   | HJURP                         | MSL3P1           | CRELD1           | ATG7             | GLYCTK  | KCTD6    | PDZRN3  |
| KIAA1524    |                | POLQ      | CCNL1                         | SERP1            | GFM1             | CTA              | ABCA11P | PCDH7    | HOPX    |
| C4orf21     | MAD2L1         | OTUD4     | TRIP13                        | NUP155           | CENPH            | ARSB             | KIF20A  | CTB      | PCDHB6  |
| TRIM27      | TBCC           | KLC4      | SLC35B2                       | FAM184A          | SCAF8            | CLDN20           | TRA2A   | STK17A   | NPC1L1  |
| LANCL2      | STX1A          | RBM48     | SLC25A13                      |                  | RINT1            | MCM4             | IMPAD1  | MLLT3    | PIP5K1B |
| C9orf85     | SMC2           | FKTN      | FBXW2                         | FPGS             | C9orf106         |                  | MAN1B1  | RP1      | CDC123  |
| NSUN6       | ZNF33A         | ZWINT     | CDK1                          | PBLD             | PLA2G12B         |                  | KIF11   | CEP55    | ANO9    |
| C11orf16    |                | PARVA     | PRMT3                         | ALKBH3           | ARHGAP1 F2       |                  | DDB1    | FEN1     | GANAB   |
| ZDHHC24     | CDK2AP2        | KDM4D     | CHEK1                         | DSTNP2           | FGFR10P2         |                  | MED21   | REP15    | IPO8    |
| TROAP       | ESPL1          | AVIL      | NUP107                        | NEDD1            | C12orf76         |                  | DYNLL1  | RPL22P19 |         |
| FANCB       | TUBGCP3        | SUPT16H   | RNF31                         | FANCM            | POLE2            | BUB1B            | CASC5   | RTF1     | CCNB2   |
| KIF23       | FANCI          | C15orf42  |                               | PRC1             | PLA2G10          | FAM57B           | ZNF629  | CIAPIN1  | DHX38   |
| CFDP1       | TMEM170A       |           | SPG7                          | TMEM220          | ELAC2            | B9D1             | ATAD5   | CCT6B    | GRB7    |
| GSDMB       | TOP2A          | RAB5C     | G6PC3                         | C17orf53         |                  | EFTUD2           | KIF18B  | TUBD1    | BRIP1   |
| GRIN2C      | CHAF1A         | PCP2      | SPC24                         | TNPO2            | DCAF15           | ZNF493           | WDR62   | PPP1R13L |         |
| CTU1        | TMEM190        | ZNF444    | ZNF274                        | ZSCAN22          | GINS1            | TPX2             | MYH7B   | DHX35    | RNF114  |
| FAM207CP    |                | UFD1L     | DEPDC5                        | PRR5             | CPT1B            | MBTPS2           | MED14   | SUV39H1  | KIF4A   |
| PGAM4       | TMSB15B        | CD99L2    | CLIC2                         |                  |                  |                  |         |          |         |
| GOBPID      | Pvalue         | OddsRatio | ExpCount                      | Count            | Size             | Term             |         |          |         |
| GO:0000087  | 22             | 360       | 3.41459242023721e-11          | 6.88313609467456 |                  | 3.83641270500311 |         |          |         |
|             |                |           | M phase of mitotic cell cycle |                  |                  |                  |         |          |         |
| GO:0051301  | 452            |           | 7.54876927158181e-11          | 5.9823148813803  | 4.81682928517058 |                  |         |          | 24      |
|             |                |           | cell division                 |                  |                  |                  |         |          |         |
| GO:0000280  | 21             | 350       | 1.39624192754594e-10          | 6.70356742921133 |                  | 3.72984568541969 |         |          |         |
|             |                |           | nuclear division              |                  |                  |                  |         |          |         |
| GO:0007067  | 21             | 350       | 1.39624192754594e-10          | 6.70356742921133 |                  | 3.72984568541969 |         |          |         |
|             |                |           | mitosis                       |                  |                  |                  |         |          |         |
| GO:0048285  | 21             | 370       | 3.87675594808876e-10          | 6.31036042829136 |                  | 3.94297972458653 |         |          |         |
|             |                |           | organelle fission             |                  |                  |                  |         |          |         |
| GO:0007017  |                |           | 6.84997114978721e-09          | 5.57160577808011 |                  | 4.1880838696284  |         |          | 20      |



STable4\_20PerPair

|            |                           |                                       |                                 |                                    |                                  |                                                                |          |                   |                   |                   |         |       |                   |
|------------|---------------------------|---------------------------------------|---------------------------------|------------------------------------|----------------------------------|----------------------------------------------------------------|----------|-------------------|-------------------|-------------------|---------|-------|-------------------|
| 393        | microtubule-based process |                                       |                                 |                                    |                                  |                                                                |          |                   |                   |                   |         |       |                   |
| GO:0000226 | 1.8416091459656e-07       | 5.96626635699315                      |                                 |                                    |                                  |                                                                |          |                   | 2.86665282679399  |                   |         |       |                   |
| 15         | 269                       | microtubule cytoskeleton organization |                                 |                                    |                                  |                                                                |          |                   |                   |                   |         |       |                   |
| GO:0007059 | 2.9322238130853e-07       | 8.44841979725701                      |                                 |                                    |                                  |                                                                |          |                   | 1.49193827416788  |                   |         |       |                   |
| 11         | 140                       | chromosome segregation                |                                 |                                    |                                  |                                                                |          |                   |                   |                   |         |       |                   |
| GO:0000075 | 3.08459887073844e-07      | 6.17061403508772                      |                                 |                                    |                                  |                                                                |          |                   | 2.57892187391876  |                   |         |       |                   |
| 14         | 242                       | cell cycle checkpoint                 |                                 |                                    |                                  |                                                                |          |                   |                   |                   |         |       |                   |
| GO:0010564 | 4.3275899288451e-07       | 4.64605614973262                      |                                 |                                    |                                  |                                                                |          |                   | 4.41187461075358  |                   |         |       |                   |
| 18         | 414                       | regulation of cell cycle process      |                                 |                                    |                                  |                                                                |          |                   |                   |                   |         |       |                   |
| GO:0006261 | 6.290165268519e-07        | 10.5022167487685                      |                                 |                                    |                                  |                                                                |          |                   | 0.991073282125804 |                   |         |       |                   |
| 9          | 93                        | DNA-dependent DNA replication         |                                 |                                    |                                  |                                                                |          |                   |                   |                   |         |       |                   |
| GO:0071156 | 8.81285201837645e-07      | 5.6188                                | 2.81336931700228                |                                    |                                  |                                                                | 14       |                   | 264               |                   |         |       |                   |
|            |                           | regulation of cell cycle arrest       |                                 |                                    |                                  |                                                                |          |                   |                   |                   |         |       |                   |
| GO:0006260 | 1.054382882607e-06        | 5.52874015748031                      |                                 |                                    |                                  |                                                                |          |                   | 2.85599612483565  |                   |         |       |                   |
| 14         | 268                       | DNA replication                       |                                 |                                    |                                  |                                                                |          |                   |                   |                   |         |       |                   |
| GO:0051329 | 2.88979446412345e-06      | 4.45051303549327                      |                                 |                                    |                                  |                                                                |          |                   | 4.03889004221161  |                   |         |       |                   |
| 16         | 379                       | interphase of mitotic cell cycle      |                                 |                                    |                                  |                                                                |          |                   |                   |                   |         |       |                   |
| GO:0006281 | 3.30705403402202e-06      | 4.40074240808751                      |                                 |                                    |                                  |                                                                |          |                   | 4.08151685004498  |                   |         |       |                   |
| 16         | 383                       | DNA repair                            |                                 |                                    |                                  |                                                                |          |                   |                   |                   |         |       |                   |
| GO:0000236 | 3.33212173069237e-06      | 10.1191958726205                      |                                 |                                    |                                  |                                                                |          |                   | 0.905819666459069 |                   |         |       |                   |
| 8          | 85                        | mitotic prometaphase                  |                                 |                                    |                                  |                                                                |          |                   |                   |                   |         |       |                   |
| GO:0051325 | 3.77768379451081e-06      | 4.35204500175788                      |                                 |                                    |                                  |                                                                |          |                   | 4.12414365787835  |                   |         |       |                   |
| 16         | 387                       | interphase                            |                                 |                                    |                                  |                                                                |          |                   |                   |                   |         |       |                   |
| GO:0007050 | 9.4456641151353e-06       | 4.25039629313498                      |                                 |                                    |                                  |                                                                |          |                   | 3.93232302262819  |                   |         |       |                   |
| 15         | 369                       | cell cycle arrest                     |                                 |                                    |                                  |                                                                |          |                   |                   |                   |         |       |                   |
|            |                           | Tissue: Heart_Left_Ventricle=>Lung    | Type:                           | asymmetric                         |                                  |                                                                |          |                   |                   |                   |         |       |                   |
|            |                           | SourceGene:                           | RP11-115C9.2(ENSG00000223582.1) |                                    |                                  |                                                                |          |                   |                   |                   |         |       |                   |
|            |                           | TargetGeneSet:                        | ALPL                            | STMN1                              | SDC3                             | CLSPN                                                          | RP11     | OLFML3            | PRCC              | RNASEL            |         |       |                   |
|            |                           | CSRPI                                 | TNFSF13B                        | TLR5                               | CENPO                            | HAT1                                                           | TRAIP    | NIT2              | CCNL1             | BCHE              |         |       |                   |
|            |                           | SLIT2                                 | CTD                             | SGCD                               | KIF13A                           | TCF19                                                          | RDBP     | TBC1D22B          | SAP25             | DENND2A           |         |       |                   |
|            |                           | ADAMDEC1                              | GGH                             | ZNF704                             | SMC2                             | CERCAM                                                         | MCM10    | PARVA             | FEN1              | ME3               |         |       |                   |
|            |                           | H2AFJ                                 | DCTN2                           | FANCB                              | CAB39L                           | TRAV13-2                                                       | VRK1     | KIF23             | CHTF18            | MPDU1             |         |       |                   |
|            |                           | DUSP3                                 | BRIP1                           | CDH2                               | CHAF1A                           | ZNF844                                                         | TPM4     | CCNE1             | GINS1             | E2F1              |         |       |                   |
|            |                           | NCAPH2                                | ACOT9                           | SUV39H1                            | MAGED2                           | RP3                                                            | FHL1     | HTATSF1           |                   | LMF2              |         |       |                   |
|            |                           | GOBPID                                | Pvalue                          | OddsRatio                          | ExpCount                         | Count                                                          | Size     | Term              |                   |                   |         |       |                   |
|            |                           | GO:0006260                            | 4.92726359204836e-07            | 11.1662864162864                   |                                  |                                                                |          |                   |                   | 0.982907757248633 |         |       |                   |
|            |                           | 9                                     | 268                             | DNA replication                    |                                  |                                                                |          |                   |                   |                   |         |       |                   |
|            |                           | GO:0051329                            | 9.75469589256103e-07            | 8.84162097434928                   |                                  |                                                                |          |                   |                   | 1.39000761192997  |         |       |                   |
|            |                           | 10                                    | 379                             | interphase of mitotic cell cycle   |                                  |                                                                |          |                   |                   |                   |         |       |                   |
|            |                           | GO:0051325                            | 1.17885522139013e-06            | 8.64906544938622                   |                                  |                                                                |          |                   |                   | 1.41934814199709  |         |       |                   |
|            |                           | 10                                    | 387                             | interphase                         |                                  |                                                                |          |                   |                   |                   |         |       |                   |
|            |                           | GO:0006323                            | 1.33198077694893e-06            | 14.854675402025                    | 0.561137637533735                |                                                                |          |                   |                   | 7                 |         |       |                   |
|            |                           | 153                                   |                                 | DNA packaging                      |                                  |                                                                |          |                   |                   |                   |         |       |                   |
|            |                           | GO:0071103                            | 5.43013306545825e-06            | 11.8862876254181                   |                                  |                                                                |          |                   |                   | 0.69317002283579  |         |       |                   |
|            |                           | 7                                     | 189                             | DNA conformation change            |                                  |                                                                |          |                   |                   |                   |         |       |                   |
|            |                           |                                       |                                 | Tissue: Heart_Left_Ventricle=>Lung | Type:                            | asymmetric                                                     |          |                   |                   |                   |         |       |                   |
|            |                           |                                       |                                 | SourceGene:                        | RP11-322F10.2(ENSG00000225782.1) |                                                                |          |                   |                   |                   |         |       |                   |
|            |                           |                                       |                                 | TargetGeneSet:                     | RP4                              | PYG02                                                          | KRTCAP3  | EPCAM             | UBC               | XYLB              | RPL24   | ALCAM | CD47              |
|            |                           |                                       |                                 | RPL35A                             | MRPS36                           | MARVELD2                                                       | RPL39P3  | RP11              | PPP1R35           | RPS6              | C9orf40 | FOLR1 |                   |
|            |                           |                                       |                                 | CARD16                             | SIRT4                            | MSI1                                                           | ENTPD5   | RPS21             | CLIC2             |                   |         |       |                   |
|            |                           |                                       |                                 | GOBPID                             | Pvalue                           | OddsRatio                                                      | ExpCount | Count             | Size              | Term              |         |       |                   |
|            |                           |                                       |                                 | GO:0006415                         | 1.66530354802416e-07             | 52.1220930232558                                               |          |                   |                   |                   |         |       |                   |
|            |                           |                                       |                                 | 5                                  | 91                               | translational termination                                      |          |                   |                   |                   |         |       |                   |
|            |                           |                                       |                                 | GO:0006414                         | 3.41324614487545e-07             | 44.78125                                                       |          | 0.152584596221715 |                   |                   |         |       | 5                 |
|            |                           |                                       |                                 | 105                                |                                  | translational elongation                                       |          |                   |                   |                   |         |       |                   |
|            |                           |                                       |                                 | GO:0006614                         | 3.41324614487545e-07             | 44.78125                                                       |          | 0.152584596221715 |                   |                   |         |       | 5                 |
|            |                           |                                       |                                 | 105                                |                                  | SRP-dependent cotranslational protein targeting to membrane    |          |                   |                   |                   |         |       |                   |
|            |                           |                                       |                                 | GO:0006613                         | 3.57890162989507e-07             | 44.3347772277228                                               |          |                   |                   |                   |         |       | 0.154037782852398 |
|            |                           |                                       |                                 | 5                                  | 106                              | cotranslational protein targeting to membrane                  |          |                   |                   |                   |         |       |                   |
|            |                           |                                       |                                 | GO:0045047                         | 3.57890162989507e-07             | 44.3347772277228                                               |          |                   |                   |                   |         |       | 0.154037782852398 |
|            |                           |                                       |                                 | 5                                  | 106                              | protein targeting to ER                                        |          |                   |                   |                   |         |       |                   |
|            |                           |                                       |                                 | GO:0072599                         | 3.57890162989507e-07             | 44.3347772277228                                               |          |                   |                   |                   |         |       | 0.154037782852398 |
|            |                           |                                       |                                 | 5                                  | 106                              | establishment of protein localization to endoplasmic reticulum |          |                   |                   |                   |         |       |                   |

Stable4\_20PerPair

|                                    |                                                                     |                  |                    |
|------------------------------------|---------------------------------------------------------------------|------------------|--------------------|
| GO:0070972                         | 6.11059274672063e-07                                                | 39.5934734513274 | 0.171476022420594  |
| 5 118                              | protein localization to endoplasmic reticulum                       |                  |                    |
| GO:0000184                         | 6.37269221328044e-07                                                | 39.2434210526316 | 0.172929209051277  |
| 5 119                              | nuclear-transcribed mRNA catabolic process, nonsense-mediated decay |                  |                    |
| GO:0019080                         | 2.07252023160669e-06                                                | 30.5736301369863 | 0.219431181233133  |
| 5 151                              | viral genome expression                                             |                  |                    |
| GO:0019083                         | 2.07252023160669e-06                                                | 30.5736301369863 | 0.219431181233133  |
| 5 151                              | viral transcription                                                 |                  |                    |
| GO:0006413                         | 2.14102678163662e-06                                                | 30.3635204081633 | 0.220884367863816  |
| 5 152                              | translational initiation                                            |                  |                    |
| GO:0006612                         | 2.21130613221479e-06                                                | 30.15625         | 0.222337554494499  |
| 153                                | protein targeting to membrane                                       |                  | 5                  |
| GO:0043624                         | 2.21130613221479e-06                                                | 30.15625         | 0.222337554494499  |
| 153                                | cellular protein complex disassembly                                |                  | 5                  |
| GO:0043241                         | 2.59046790562861e-06                                                | 29.1605392156863 | 0.229603487647914  |
| 5 158                              | protein complex disassembly                                         |                  |                    |
| GO:0000956                         | 3.60508079251103e-06                                                | 27.1836890243902 | 0.245588540585427  |
| 5 169                              | nuclear-transcribed mRNA catabolic process                          |                  |                    |
| GO:0034623                         | 4.15875560962841e-06                                                | 26.3701923076923 | 0.252854473738842  |
| 5 174                              | cellular macromolecular complex disassembly                         |                  |                    |
| GO:0006402                         | 4.64809310483942e-06                                                | 25.7532514450867 | 0.258667220261574  |
| 5 178                              | mRNA catabolic process                                              |                  |                    |
| GO:0032984                         | 4.77722089716488e-06                                                | 25.6034482758621 | 0.260120406892257  |
| 5 179                              | macromolecular complex disassembly                                  |                  |                    |
| GO:0072594                         | 9.03640818071238e-06                                                | 22.347675879397  | 0.296450072659332  |
| 204                                | establishment of protein localization to organelle                  |                  | 5                  |
| GO:0006401                         | 9.25371449781464e-06                                                | 22.234375        | 0.297903259290015  |
| 205                                | RNA catabolic process                                               |                  | 5                  |
| GO:0019058                         | 1.65016098367336e-05                                                | 19.6404867256637 | 0.335686111687772  |
| 5 231                              | viral infectious cycle                                              |                  |                    |
| Tissue: Heart_Left_Ventricle=>Lung | Type: asymmetric                                                    |                  |                    |
| SourceGene:                        | RP11-469M7.1(ENSG00000260006.1)                                     |                  |                    |
| TargetGeneSet:                     | EXOSC10 DHDDS IPP RP11 TMED5 NRAS GAPDHP32 ECM1                     |                  |                    |
| BGLAP                              | POU2F1 TARBP1 DDX1 DHX57 ANKRD36 PSMD14 SPC25 THUMP3 MAP4           |                  |                    |
| TRAI                               | FAM116A PSMC1P1 POLQ KALRN CCNL1 ACTG1P1 PSMD2 CTA FAM200B          |                  |                    |
| TRIP13                             | NUP155 AP3B1 CTB ANXA6 RARS MDC1 SLC35B2 MMS22L RP1                 |                  |                    |
| LPAL2                              | BET1 SAP25 RINT1 U1 ZDHHC2 WRN MAL2 VCP FBXW2                       |                  |                    |
| ITGB1                              | ZNF33A PBLD SFTPA2 SMPD1 PARVA FEN1 C11orf75 GUCY1A2                |                  |                    |
| RPL23AP64                          | RNF26 CHEK1 RAD52 MED21 NUP107 NEDD1 UBL3 FANCB                     |                  |                    |
| FANCM                              | POLE2 PLEKHG3 LRRC57 TPM1 KBTBD13 KIAA1199 FANCI PRC1               |                  |                    |
| GDPD3                              | ZNF629 DHX38 TMEM170A ELAC2 ATAD5 CCT6B KIF18B TUBD1                |                  |                    |
| BRIP1                              | ATP5A1 HAUS1 DSEL CHAF1A S1PR2 SPC24 SLC7A9 ZNF615 CDK5RAP1         |                  |                    |
| MYH9                               | MBTPS2 SUV39H1 LONRF3                                               |                  |                    |
| GOBPID                             | Pvalue OddsRatio ExpCount Count Size Term                           |                  |                    |
| GO:0006281                         | 1.96003099635743e-09                                                | 8.91898777173913 | 2.09376513736074   |
| 15 383                             | DNA repair                                                          |                  |                    |
| GO:0006302                         | 4.15365138271882e-09                                                | 19.7405529953917 | 0.557608470002076  |
| 9 102                              | double-strand break repair                                          |                  |                    |
| GO:0006310                         | 1.95112202809718e-07                                                | 10.3218993518316 | 1.14255068853367   |
| 10 209                             | DNA recombination                                                   |                  |                    |
| GO:0045005                         | 3.96064953679518e-07                                                | 95.76            | 0.0656009964708325 |
| 4                                  | 12                                                                  |                  |                    |
| GO:0006261                         | 7.23288120010436e-07                                                | 16.1501937984496 | 0.508407722648952  |
| 7 93                               | DNA-dependent DNA replication                                       |                  |                    |
| GO:0006260                         | 1.90186696360858e-06                                                | 7.92832266037524 | 1.46508892118193   |
| 10 268                             | DNA replication                                                     |                  |                    |
| GO:0031297                         | 5.4176636865537e-06                                                 | 141.789473684211 | 0.0382672479413189 |
| 3 7                                | replication fork processing                                         |                  |                    |
| GO:0000724                         | 1.00390326144296e-05                                                | 20.1632882882883 | 0.289737734412843  |
| 5 53                               | double-strand break repair via homologous recombination             |                  |                    |
| GO:0000725                         | 1.10163471052765e-05                                                | 19.7504136789851 | 0.295204484118746  |
| 5 54                               | recombinational repair                                              |                  |                    |
| GO:0051320                         | 1.28279379400116e-05                                                | 10.1768790849673 | 0.781745207944087  |

STable4\_20PerPair

7 143 S phase  
Tissue: Heart\_Left\_Ventricle=>Lung Type: asymmetric  
SourceGene: RP11-70503.1(ENSG00000246174.2)  
TargetGeneSet: RP11 TIGD2 GYPA PCDHA5 TDP2 ABHD11 DEFA4 DEFA3  
FAM108B1 MS4A3 TMEM121 MPO CST2 RHOT1P2  
GOBPID Pvalue OddsRatio ExpCount Count Size Term  
GO:0050832 1.89422397636428e-07 424.264705882353 0.0124558854058543  
3 20 defense response to fungus  
GO:0009620 9.02902190532709e-07 240.2 0.0205522109196595 3 33  
response to fungus  
Tissue: Heart\_Left\_Ventricle=>Lung Type: asymmetric  
SourceGene: RP11-723D22.3(ENSG00000253829.1)  
TargetGeneSet: RPL11 7SK RP4 RPL5 OCLM ASXL2 UBC RPL15 RP11  
USP4 SLC02A1 RPL35A RPL34 RPS14 RPS10 RPL10A MRPS12 KRIT1 IMMP2L CTD  
RPL30 RPS6 GKAP1 HSD17B3 SNORD90 LRRC8A RPS24 RPL13AP5 C10orf12  
PTPRE RPS13 PRDX5 FAU PFDN5 RBMS1P1 MDM2 CHST11 ESD RPS3AP6  
RPLP1 NFATC2IP CDYL2 ALOX15B RPL26 FOXO3B RFFL RPL17 RPL27  
ZNF813 RPS9 NCOA3 ARFGEF2 MID2  
GOBPID Pvalue OddsRatio ExpCount Count Size Term  
GO:0006415 2.5603980931057e-31 151.313888888889 0.277074250916892  
19 91 translational termination  
GO:0006414 5.05762996742098e-30 126.557674418605 0.31970105875026  
19 105 translational elongation  
GO:0006614 5.05762996742098e-30 126.557674418605 0.31970105875026  
19 105 SRP-dependent cotranslational protein targeting to membrane  
GO:0006613 6.1519748877624e-30 125.094252873563 0.322745830738357  
19 106 cotranslational protein targeting to membrane  
GO:0045047 6.1519748877624e-30 125.094252873563 0.322745830738357  
19 106 protein targeting to ER  
GO:0072599 6.1519748877624e-30 125.094252873563 0.322745830738357  
19 106 establishment of protein localization to endoplasmic reticulum  
GO:0070972 5.56638703863715e-29 109.8391919192 0.35928309459553  
19 118 protein localization to endoplasmic reticulum  
GO:0000184 6.61303269373228e-29 108.7332 0.362327866583627 19  
119 nuclear-transcribed mRNA catabolic process, nonsense-mediated decay  
GO:0019080 8.09971816547013e-27 82.1893939393939 0.459760570202754  
19 151 viral genome expression  
GO:0019083 8.09971816547013e-27 82.1893939393939 0.459760570202754  
19 151 viral transcription  
GO:0006413 9.24146203052846e-27 81.5657142857143 0.462805342190852  
19 152 translational initiation  
GO:0006612 1.0534310133535e-26 80.9513432835821 0.46585011417895  
19 153 protein targeting to membrane  
GO:0043624 1.0534310133535e-26 80.9513432835821 0.46585011417895  
19 153 cellular protein complex disassembly  
GO:0043241 2.00007357656436e-26 78.0120863309352 0.481073974119438  
19 158 protein complex disassembly  
GO:0072594 5.01990939016781e-26 64.4157608695652 0.621133485571933  
20 204 establishment of protein localization to organelle  
GO:0000956 7.61359271306488e-26 72.2354666666667 0.514566465988513  
19 169 nuclear-transcribed mRNA catabolic process  
GO:0034623 1.35576286702987e-25 69.8807741935484 0.529790325929001  
19 174 cellular macromolecular complex disassembly  
GO:0006402 2.12402765554839e-25 68.1036477987421 0.541969413881392  
19 178 mRNA catabolic process  
GO:0032984 2.37230667119594e-25 67.67325 0.54501418586949 19  
179 macromolecular complex disassembly  
GO:0006401 3.40229111940558e-24 58.107311827957 0.62417825756003 19  
205 RNA catabolic process  
GO:0019058 3.47933016120422e-23 50.8877358490566 0.703342329250571  
19 231 viral infectious cycle  
GO:0022415 3.42058338548897e-22 44.6728630705394 0.791640716905404  
19 260 viral reproductive process

Stable4\_20PerPair

|                 |                                                |                                                             |                    |   |
|-----------------|------------------------------------------------|-------------------------------------------------------------|--------------------|---|
| GO:0071845      | 1.86427534219837e-21                           | 40.5581886792453                                            | 0.864715244619749  |   |
| 19              | 284                                            | cellular component disassembly at cellular level            |                    |   |
| GO:0022411      | 2.43672401642247e-21                           | 39.9437918215613                                            | 0.87689433257214   |   |
| 19              | 288                                            | cellular component disassembly                              |                    |   |
| GO:0033365      | 4.22101928156436e-20                           | 28.1892073874567                                            | 1.44017715037022   |   |
| 21              | 473                                            | protein localization to organelle                           |                    |   |
| GO:0006605      | 1.18992594108223e-18                           | 25.6112334801762                                            | 1.44322192235831   |   |
| 20              | 474                                            | protein targeting                                           |                    |   |
| GO:0016032      | 1.1618245029038e-17                            | 24.5856481481481                                            | 1.37319216663207   |   |
| 19              | 451                                            | viral reproduction                                          |                    |   |
| GO:0006364      | 2.51065623580698e-08                           | 27.9102814154361                                            | 0.316656286762162  |   |
| 7               | 104                                            | rRNA processing                                             |                    |   |
| GO:0042273      | 3.63450224529092e-08                           | 179.9875                                                    | 0.0365372638571725 | 4 |
| 12              |                                                | ribosomal large subunit biogenesis                          |                    |   |
| GO:0016072      | 3.71045693642895e-08                           | 26.2734190501181                                            | 0.334924918690748  |   |
| 7               | 110                                            | rRNA metabolic process                                      |                    |   |
| GO:0042254      | 2.99457733795892e-07                           | 19.0055196041112                                            | 0.453671026226559  |   |
| 7               | 149                                            | ribosome biogenesis                                         |                    |   |
| GO:0022613      | 3.33587853221997e-07                           | 14.531490015361                                             | 0.685073697321985  | 8 |
| 225             |                                                | ribonucleoprotein complex biogenesis                        |                    |   |
| GO:0071843      | 5.27937993328423e-07                           | 13.6373256373256                                            | 0.727700505155353  |   |
| 8               | 239                                            | cellular component biogenesis at cellular level             |                    |   |
| GO:0034470      | 2.17447811327912e-06                           | 13.933342669094                                             | 0.608954397619542  | 7 |
| 200             |                                                | ncRNA processing                                            |                    |   |
| Tissue:         | Heart_Left_Ventricle=>Lung                     | Type:                                                       | asymmetric         |   |
| SourceGene:     | RP3-322G13.7(ENSG00000234832.1)                |                                                             |                    |   |
| TargetGeneSet:  | RP11 SNORA55 CYP4Z2P ITGB5-AS1 MSMO1 SAP30 CTD |                                                             |                    |   |
| HMGCS1 PCDHB9   | PPP1R16A RP13 UPF3AP3 IKZF5 NTN4               |                                                             | MAP1LC3B2          |   |
| ZDHHC20-IT1     | C14orf1 MVD CYCS RBBP9 RPL36P4 MT              |                                                             |                    |   |
| GOBPID          | Pvalue OddsRatio ExpCount Count Size Term      |                                                             |                    |   |
| GO:0016126      | 1.138892003711e-07                             | 127.928888888889                                            | 0.0474707632689779 |   |
| 4               | 49                                             | sterol biosynthetic process                                 |                    |   |
| GO:0016125      | 4.10560577174981e-06                           | 49.815652173913                                             | 0.115286139367518  | 4 |
| 119             |                                                | sterol metabolic process                                    |                    |   |
| GO:0006694      | 7.8338182759668e-06                            | 42.0617647058824                                            | 0.13563075219708   |   |
| 4               | 140                                            | steroid biosynthetic process                                |                    |   |
| GO:0006695      | 8.7311967723947e-06                            | 98.1613636363636                                            | 0.0416580167462459 |   |
| 3               | 43                                             | cholesterol biosynthetic process                            |                    |   |
| Tissue:         | Lung=>Heart_Left_Ventricle                     | Type:                                                       | asymmetric         |   |
| SourceGene:     | RP4-604G5.1(ENSG00000237640.1)                 |                                                             |                    |   |
| TargetGeneSet:  | KLHL17 NPPB RP11 GDI2P2 DPYD-AS1 ATXN7L2 MYOC  |                                                             |                    |   |
| PFN1P1 MIR4426  | FTH1P2 ZNF692 DPY30 GALNT3 RPL37A ILKAP        |                                                             | PDCD6IP RPL7AP11   |   |
| EEF1A1P25       | RAP2B CXCL5 TMSB4XP8 TNIP3 CTD                 |                                                             | RPS23 FAM193B      |   |
| GTF2H4 LYPLA2P1 | RPL24P4 RP1 RPL23P8 EGFR                       |                                                             | PDGFRL FAM160B2    |   |
| KIAA1875        | ADCK5 ROR2 SKA2L C9orf114                      |                                                             | C10orf62 C11orf10  |   |
| MIR1304 NOP2    | EEF1A1P33 AAAS TESPA1 RPL41 SPPL3              |                                                             | PUS1 RPS11P5       |   |
| RPS29 CASC5     | C16orf79 IRX6 YWHAE GLP2R PRR11                |                                                             | INTS2 RPL38        |   |
| SLC38A10        | CCDC137 NCLN SNRPEP4 C19orf79                  |                                                             | QTRT1 TRMT1 AP1M1  |   |
| GRIK5 RP4       | RPL24P2 C20orf24 RPS21 UCKL1                   |                                                             | NCAM2 CTA SGSM3    |   |
| MAPK8IP2        | PSMA6P2 PRICKLE3 PGAM4 FAM199X                 |                                                             | RP3 FTH1P8         |   |
| GOBPID          | Pvalue OddsRatio ExpCount Count Size Term      |                                                             |                    |   |
| GO:0070972      | 9.71104964429525e-08                           | 22.534009009009                                             | 0.383779669227043  | 7 |
| 118             |                                                | protein localization to endoplasmic reticulum               |                    |   |
| GO:0006415      | 4.60459441584333e-07                           | 24.6525107604017                                            | 0.295965677115771  |   |
| 6               | 91                                             | translational termination                                   |                    |   |
| GO:0019080      | 5.24239948151167e-07                           | 17.3298611111111                                            | 0.491107881807487  |   |
| 7               | 151                                            | viral genome expression                                     |                    |   |
| GO:0019083      | 5.24239948151167e-07                           | 17.3298611111111                                            | 0.491107881807487  |   |
| 7               | 151                                            | viral transcription                                         |                    |   |
| GO:0006414      | 1.07442747741021e-06                           | 21.1456023651146                                            | 0.341498858210504  |   |
| 6               | 105                                            | translational elongation                                    |                    |   |
| GO:0006614      | 1.07442747741021e-06                           | 21.1456023651146                                            | 0.341498858210504  |   |
| 6               | 105                                            | SRP-dependent cotranslational protein targeting to membrane |                    |   |

Stable4\_20PerPair

|                                                                         |                                                                     |                                                             |                   |   |
|-------------------------------------------------------------------------|---------------------------------------------------------------------|-------------------------------------------------------------|-------------------|---|
| GO:0006613                                                              | 1.13612011101643e-06                                                | 20.9326829268293                                            | 0.3447512282887   | 6 |
| 106                                                                     | cotranslational protein targeting to membrane                       |                                                             |                   |   |
| GO:0045047                                                              | 1.13612011101643e-06                                                | 20.9326829268293                                            | 0.3447512282887   | 6 |
| 106                                                                     | protein targeting to ER                                             |                                                             |                   |   |
| GO:0072599                                                              | 1.13612011101643e-06                                                | 20.9326829268293                                            | 0.3447512282887   | 6 |
| 106                                                                     | establishment of protein localization to endoplasmic reticulum      |                                                             |                   |   |
| GO:0000184                                                              | 2.23897097097223e-06                                                | 18.507662421757                                             | 0.387032039305238 | 6 |
| 119                                                                     | nuclear-transcribed mRNA catabolic process, nonsense-mediated decay |                                                             |                   |   |
| GO:0019058                                                              | 8.88767604249368e-06                                                | 11.078125                                                   | 0.75129748806311  | 7 |
| 231                                                                     | viral infectious cycle                                              |                                                             |                   |   |
| GO:0006413                                                              | 9.22796613593862e-06                                                | 14.2913464751086                                            | 0.494360251885683 |   |
| 6                                                                       | 152                                                                 | translational initiation                                    |                   |   |
| GO:0006612                                                              | 9.58122597442802e-06                                                | 14.1931309109009                                            | 0.497612621963878 |   |
| 6                                                                       | 153                                                                 | protein targeting to membrane                               |                   |   |
| GO:0043624                                                              | 9.58122597442802e-06                                                | 14.1931309109009                                            | 0.497612621963878 |   |
| 6                                                                       | 153                                                                 | cellular protein complex disassembly                        |                   |   |
| GO:0043241                                                              | 1.15159550618145e-05                                                | 13.7214377406932                                            | 0.513874472354854 |   |
| 6                                                                       | 158                                                                 | protein complex disassembly                                 |                   |   |
| GO:0016032                                                              | 1.2308528359795e-05                                                 | 7.48142414860681                                            | 1.46681890526607  |   |
| 9                                                                       | 451                                                                 | viral reproduction                                          |                   |   |
| GO:0000956                                                              | 1.68955941365674e-05                                                | 12.785575340416                                             | 0.549650543215002 | 6 |
| 169                                                                     | nuclear-transcribed mRNA catabolic process                          |                                                             |                   |   |
| GO:0022415                                                              | 1.91468811180636e-05                                                | 9.78824110671937                                            | 0.845616220330773 |   |
| 7                                                                       | 260                                                                 | viral reproductive process                                  |                   |   |
| GO:0034623                                                              | 1.99335748672826e-05                                                | 12.4006968641115                                            | 0.565912393605979 |   |
| 6                                                                       | 174                                                                 | cellular macromolecular complex disassembly                 |                   |   |
| Tissue: Lung=>Heart_Left_Ventricle Type: cluster                        |                                                                     |                                                             |                   |   |
| SourceGene: RP4-604G5.1(ENSG00000237640.1)                              |                                                                     |                                                             |                   |   |
| TargetGeneSet: KLHL17 NPPB RP11 GDI2P2 DPYD-AS1 ATXN7L2 MYOC            |                                                                     |                                                             |                   |   |
| PFN1P1 MIR4426 FTH1P2 ZNF692 DPY30 GALNT3 RPL37A ILKAP PDCD6IP RPL7AP11 |                                                                     |                                                             |                   |   |
| EEF1A1P25 RAP2B CXCL5 TMSB4XP8 TNIP3 CTD RPS23 FAM193B                  |                                                                     |                                                             |                   |   |
| GTF2H4 LYPLA2P1 RPL24P4 RP1 RPL23P8 EGFR PDGFRL FAM160B2                |                                                                     |                                                             |                   |   |
| KIAA1875 ADCK5 ROR2 SKA2L C9orf114 C10orf62 C11orf10                    |                                                                     |                                                             |                   |   |
| MIR1304 NOP2 EEF1A1P33 AAAS TESPA1 RPL41 SPPL3 PUS1 RPS11P5             |                                                                     |                                                             |                   |   |
| RPS29 CASC5 C16orf79 IRX6 YWHAE GLP2R PRR11 INTS2 RPL38                 |                                                                     |                                                             |                   |   |
| SLC38A10 CCDC137 NCLN SNRPEP4 C19orf79 QTRT1 TRMT1 AP1M1                |                                                                     |                                                             |                   |   |
| GRIK5 RP4 RPL24P2 C20orf24 RPS21 UCKL1 NCAM2 CTA SGSM3                  |                                                                     |                                                             |                   |   |
| MAPK8IP2 PSMA6P2 PRICKLE3 PGAM4 FAM199X RP3 FTH1P8                      |                                                                     |                                                             |                   |   |
| GOBPID Pvalue OddsRatio ExpCount Count Size Term                        |                                                                     |                                                             |                   |   |
| GO:0070972                                                              | 9.71104964429525e-08                                                | 22.534009009009                                             | 0.383779669227043 | 7 |
| 118                                                                     | protein localization to endoplasmic reticulum                       |                                                             |                   |   |
| GO:0006415                                                              | 4.60459441584333e-07                                                | 24.6525107604017                                            | 0.295965677115771 |   |
| 6                                                                       | 91                                                                  | translational termination                                   |                   |   |
| GO:0019080                                                              | 5.24239948151167e-07                                                | 17.3298611111111                                            | 0.491107881807487 |   |
| 7                                                                       | 151                                                                 | viral genome expression                                     |                   |   |
| GO:0019083                                                              | 5.24239948151167e-07                                                | 17.3298611111111                                            | 0.491107881807487 |   |
| 7                                                                       | 151                                                                 | viral transcription                                         |                   |   |
| GO:0006414                                                              | 1.07442747741021e-06                                                | 21.1456023651146                                            | 0.341498858210504 |   |
| 6                                                                       | 105                                                                 | translational elongation                                    |                   |   |
| GO:0006614                                                              | 1.07442747741021e-06                                                | 21.1456023651146                                            | 0.341498858210504 |   |
| 6                                                                       | 105                                                                 | SRP-dependent cotranslational protein targeting to membrane |                   |   |
| GO:0006613                                                              | 1.13612011101643e-06                                                | 20.9326829268293                                            | 0.3447512282887   | 6 |
| 106                                                                     | cotranslational protein targeting to membrane                       |                                                             |                   |   |
| GO:0045047                                                              | 1.13612011101643e-06                                                | 20.9326829268293                                            | 0.3447512282887   | 6 |
| 106                                                                     | protein targeting to ER                                             |                                                             |                   |   |
| GO:0072599                                                              | 1.13612011101643e-06                                                | 20.9326829268293                                            | 0.3447512282887   | 6 |
| 106                                                                     | establishment of protein localization to endoplasmic reticulum      |                                                             |                   |   |
| GO:0000184                                                              | 2.23897097097223e-06                                                | 18.507662421757                                             | 0.387032039305238 | 6 |
| 119                                                                     | nuclear-transcribed mRNA catabolic process, nonsense-mediated decay |                                                             |                   |   |
| GO:0019058                                                              | 8.88767604249368e-06                                                | 11.078125                                                   | 0.75129748806311  | 7 |
| 231                                                                     | viral infectious cycle                                              |                                                             |                   |   |
| GO:0006413                                                              | 9.22796613593862e-06                                                | 14.2913464751086                                            | 0.494360251885683 |   |
| 6                                                                       | 152                                                                 | translational initiation                                    |                   |   |

STable4\_20PerPair

GO:0006612 9.58122597442802e-06 14.1931309109009 0.497612621963878  
 6 153 protein targeting to membrane  
 GO:0043624 9.58122597442802e-06 14.1931309109009 0.497612621963878  
 6 153 cellular protein complex disassembly  
 GO:0043241 1.15159550618145e-05 13.7214377406932 0.513874472354854  
 6 158 protein complex disassembly  
 GO:0016032 1.2308528359795e-05 7.48142414860681 1.46681890526607  
 9 451 viral reproduction  
 GO:0000956 1.68955941365674e-05 12.785575340416 0.549650543215002 6  
 169 nuclear-transcribed mRNA catabolic process  
 GO:0022415 1.91468811180636e-05 9.78824110671937 0.845616220330773  
 7 260 viral reproductive process  
 GO:0034623 1.99335748672826e-05 12.4006968641115 0.565912393605979  
 6 174 cellular macromolecular complex disassembly  
 Tissue: Lung=>Heart\_Left\_Ventricle Type: asymmetric

SourceGene: VENTXP6(ENSG00000254105.1) VENT homeobox pseudogene 6

TargetGeneSet: LIMS1 NDUFB3 CNPPD1 RP11 RP1 LSM5 SDHDP2 RPL8  
 RPS13 EEF1A1P33 RPS29 RPS17L RPL38 ELMO2 ALG12 MED14-AS1

| GOBPID     | Pvalue   | OddsRatio | ExpCount            | Count       | Size | Term                                                           |
|------------|----------|-----------|---------------------|-------------|------|----------------------------------------------------------------|
| GO:0000956 | 3.75E-09 |           | 75.06573181         | 0.152031001 | 6    | 169                                                            |
|            |          |           |                     |             |      | nuclear-transcribed mRNA catabolic process                     |
| GO:0006402 | 5.13E-09 |           | 71.09302326         | 0.160127327 | 6    | 178 mRNA                                                       |
|            |          |           |                     |             |      | catabolic process                                              |
| GO:0006415 | 1.10E-08 |           | 104.3023256         | 0.081862847 | 5    | 91                                                             |
|            |          |           |                     |             |      | translational termination                                      |
| GO:0006401 | 1.20E-08 |           | 61.33094042         | 0.184416303 | 6    | 205 RNA                                                        |
|            |          |           |                     |             |      | catabolic process                                              |
| GO:0006414 | 2.26E-08 |           | 89.6125 0.094457131 | 5           | 105  |                                                                |
|            |          |           |                     |             |      | translational elongation                                       |
| GO:0006614 | 2.26E-08 |           | 89.6125 0.094457131 | 5           | 105  |                                                                |
|            |          |           |                     |             |      | SRP-dependent cotranslational protein targeting to membrane    |
| GO:0006613 | 2.37E-08 |           | 88.71905941         | 0.095356723 | 5    | 106                                                            |
|            |          |           |                     |             |      | cotranslational protein targeting to membrane                  |
| GO:0045047 | 2.37E-08 |           | 88.71905941         | 0.095356723 | 5    | 106                                                            |
|            |          |           |                     |             |      | protein targeting to ER                                        |
| GO:0072599 | 2.37E-08 |           | 88.71905941         | 0.095356723 | 5    | 106                                                            |
|            |          |           |                     |             |      | establishment of protein localization to endoplasmic reticulum |

| STable4_20PerPair                                                     |          |             |             |   |     |
|-----------------------------------------------------------------------|----------|-------------|-------------|---|-----|
| GO:0070972                                                            | 4.07E-08 | 79.23119469 | 0.106151823 | 5 | 118 |
| protein localization to endoplasmic reticulum                         |          |             |             |   |     |
| GO:0000184                                                            | 4.25E-08 | 78.53070175 | 0.107051415 | 5 | 119 |
| "nuclear-transcribed mRNA catabolic process, nonsense-mediated decay" |          |             |             |   |     |
| GO:0019080                                                            | 1.40E-07 | 61.18150685 | 0.13583835  | 5 | 151 |
| viral genome expression                                               |          |             |             |   |     |
| GO:0019083                                                            | 1.40E-07 | 61.18150685 | 0.13583835  | 5 | 151 |
| viral transcription                                                   |          |             |             |   |     |
| GO:0006413                                                            | 1.45E-07 | 60.76105442 | 0.136737942 | 5 | 152 |
| translational initiation                                              |          |             |             |   |     |
| GO:0006612                                                            | 1.50E-07 | 60.34628378 | 0.137637534 | 5 | 153 |
| protein targeting to membrane                                         |          |             |             |   |     |
| GO:0043624                                                            | 1.50E-07 | 60.34628378 | 0.137637534 | 5 | 153 |
| cellular protein complex disassembly                                  |          |             |             |   |     |
| GO:0043241                                                            | 1.76E-07 | 58.35375817 | 0.142135492 | 5 | 158 |
| protein complex disassembly                                           |          |             |             |   |     |
| GO:0034623                                                            | 2.84E-07 | 52.76997041 | 0.15652896  | 5 | 174 |
| cellular macromolecular complex disassembly                           |          |             |             |   |     |
| GO:0032984                                                            | 3.27E-07 | 51.23563218 | 0.161026919 | 5 | 179 |
| macromolecular complex disassembly                                    |          |             |             |   |     |
| GO:0072594                                                            | 6.27E-07 | 44.72047739 | 0.183516712 | 5 | 204 |
| establishment of protein localization to organelle                    |          |             |             |   |     |
| GO:0019058                                                            | 1.16E-06 | 39.30309735 | 0.207805688 | 5 | 231 |
| viral infectious cycle                                                |          |             |             |   |     |
| GO:0022415                                                            | 2.08E-06 | 34.7622549  | 0.233893848 | 5 | 260 |
| viral reproductive process                                            |          |             |             |   |     |
| GO:0071845                                                            | 3.20E-06 | 31.71818996 | 0.25548405  | 5 | 284 |
| cellular component disassembly at cellular level                      |          |             |             |   |     |
| GO:0022411                                                            | 3.43E-06 | 31.2610424  | 0.259082416 | 5 | 288 |
| cellular component disassembly                                        |          |             |             |   |     |

Tissue: Lung=>Muscle\_skeletal Type: asymmetric  
SourceGene: CALR(ENSG00000179218.6)  
TargetGeneSet: C1orf192 C2orf44 OLA1 SNORD19B RP11 PCNP

Stable4\_20PerPair

| GOBPID                                                              | Pvalue | OddsRatio | ExpCount             | Count            | Size              | Term                                                                |
|---------------------------------------------------------------------|--------|-----------|----------------------|------------------|-------------------|---------------------------------------------------------------------|
| GO:0006413                                                          | 7      | 152       | 9.23058599239458e-09 | 34.4665517241379 |                   | 0.283994187253477                                                   |
|                                                                     |        |           |                      |                  |                   | translational initiation                                            |
| GO:0000184                                                          | 6      | 119       | 7.05889254764862e-08 | 36.1845764854614 |                   | 0.222337554494499                                                   |
|                                                                     |        |           |                      |                  |                   | nuclear-transcribed mRNA catabolic process, nonsense-mediated decay |
| GO:0006401                                                          | 7      | 205       | 7.28458370460635e-08 | 25.1469696969697 |                   | 0.383018476230019                                                   |
|                                                                     |        |           |                      |                  |                   | RNA catabolic process                                               |
| GO:0000956                                                          | 6      | 169       | 5.65205978561604e-07 | 24.9973707274321 |                   | 0.315756695038406                                                   |
|                                                                     |        |           |                      |                  |                   | nuclear-transcribed mRNA catabolic process                          |
| GO:0006415                                                          | 5      | 91        | 6.41277891250554e-07 | 37.8911205073996 |                   | 0.170022835789911                                                   |
|                                                                     |        |           |                      |                  |                   | translational termination                                           |
| GO:0006402                                                          | 6      | 178       | 7.66472280893686e-07 | 23.6744186046512 |                   | 0.332572140336309                                                   |
|                                                                     |        |           |                      |                  |                   | mRNA catabolic process                                              |
| GO:0006414                                                          | 5      | 105       | 1.3080209252186e-06  | 32.5545454545455 |                   | 0.196180195142205                                                   |
|                                                                     |        |           |                      |                  |                   | translational elongation                                            |
| GO:0006614                                                          | 5      | 105       | 1.3080209252186e-06  | 32.5545454545455 |                   | 0.196180195142205                                                   |
|                                                                     |        |           |                      |                  |                   | SRP-dependent cotranslational protein targeting to membrane         |
| GO:0006613                                                          | 5      | 106       | 1.3710283642215e-06  | 32.2299729972997 |                   | 0.198048577953083                                                   |
|                                                                     |        |           |                      |                  |                   | cotranslational protein targeting to membrane                       |
| GO:0045047                                                          | 5      | 106       | 1.3710283642215e-06  | 32.2299729972997 |                   | 0.198048577953083                                                   |
|                                                                     |        |           |                      |                  |                   | protein targeting to ER                                             |
| GO:0072599                                                          | 5      | 106       | 1.3710283642215e-06  | 32.2299729972997 |                   | 0.198048577953083                                                   |
|                                                                     |        |           |                      |                  |                   | establishment of protein localization to endoplasmic reticulum      |
| GO:0070972                                                          | 118    |           | 2.33117693976938e-06 | 28.783185840708  | 0.220469171683621 | 5                                                                   |
|                                                                     |        |           |                      |                  |                   | protein localization to endoplasmic reticulum                       |
| GO:0019058                                                          | 6      | 231       | 3.49388704343774e-06 | 18.0304761904762 |                   | 0.43159642931285                                                    |
|                                                                     |        |           |                      |                  |                   | viral infectious cycle                                              |
| GO:0022415                                                          | 6      | 260       | 6.89985689854706e-06 | 15.9392575928009 |                   | 0.485779530828316                                                   |
|                                                                     |        |           |                      |                  |                   | viral reproductive process                                          |
| GO:0019080                                                          | 5      | 151       | 7.81678864797814e-06 | 22.2260273972603 |                   | 0.282125804442599                                                   |
|                                                                     |        |           |                      |                  |                   | viral genome expression                                             |
| GO:0019083                                                          | 5      | 151       | 7.81678864797814e-06 | 22.2260273972603 |                   | 0.282125804442599                                                   |
|                                                                     |        |           |                      |                  |                   | viral transcription                                                 |
| GO:0006612                                                          | 5      | 153       | 8.33446558546097e-06 | 21.9226044226044 |                   | 0.285862570064355                                                   |
|                                                                     |        |           |                      |                  |                   | protein targeting to membrane                                       |
| GO:0043624                                                          | 5      | 153       | 8.33446558546097e-06 | 21.9226044226044 |                   | 0.285862570064355                                                   |
|                                                                     |        |           |                      |                  |                   | cellular protein complex disassembly                                |
| GO:0043241                                                          | 158    |           | 9.74664991833363e-06 | 21.198752228164  | 0.295204484118746 | 5                                                                   |
|                                                                     |        |           |                      |                  |                   | protein complex disassembly                                         |
| GO:0016032                                                          | 7      | 451       | 1.42153456865043e-05 | 11.0202702702703 |                   | 0.842640647706041                                                   |
|                                                                     |        |           |                      |                  |                   | viral reproduction                                                  |
| GO:0034623                                                          | 174    |           | 1.55609181597683e-05 | 19.170252824099  | 0.325098609092796 | 5                                                                   |
|                                                                     |        |           |                      |                  |                   | cellular macromolecular complex disassembly                         |
| GO:0032984                                                          | 5      | 179       | 1.78441369704505e-05 | 18.6128526645768 |                   | 0.334440523147187                                                   |
|                                                                     |        |           |                      |                  |                   | macromolecular complex disassembly                                  |
| Tissue: Muscle_skeletal=>Lung Type: asymmetric                      |        |           |                      |                  |                   |                                                                     |
| SourceGene: CTD-3064C13.1(ENSG00000255372.1)                        |        |           |                      |                  |                   |                                                                     |
| TargetGeneSet: RPL22 RPL5 RP11 RPL15 DNAJC13 KLHL24 HMGCS1 BTF3 CTB |        |           |                      |                  |                   |                                                                     |
| RPS14 RP3 RPL10A EEF1A1 RAC1 TOMM7 UQCRB EIF3H EEF1D IDI2-AS1       |        |           |                      |                  |                   |                                                                     |
| PFN1P11 RPS13 CTSF DHCR7 IL18BP B3GAT1 TPT1 GZMH MAPKBP1 RPL4       |        |           |                      |                  |                   |                                                                     |
| ANKFY1 RPS11 PNPLA4                                                 |        |           |                      |                  |                   |                                                                     |
| GOBPID                                                              | Pvalue | OddsRatio | ExpCount             | Count            | Size              | Term                                                                |
| GO:0006414                                                          | 10     | 105       | 2.0142792696908e-15  | 88.7244582043344 |                   | 0.196180195142205                                                   |
|                                                                     |        |           |                      |                  |                   | translational elongation                                            |
| GO:0006415                                                          | 8      | 91        | 3.63613987228667e-12 | 72.7507926442613 |                   | 0.170022835789911                                                   |
|                                                                     |        |           |                      |                  |                   | translational termination                                           |
| GO:0006413                                                          | 9      | 152       | 4.95086588893475e-12 | 49.9335664335664 |                   | 0.283994187253477                                                   |
|                                                                     |        |           |                      |                  |                   | translational initiation                                            |
| GO:0006614                                                          |        |           | 1.17345503194058e-11 | 62.1899077590884 |                   | 0.196180195142205                                                   |



Stable4\_20PerPair

|            |     |                                                                     |                  |                   |  |   |
|------------|-----|---------------------------------------------------------------------|------------------|-------------------|--|---|
| 8          | 105 | SRP-dependent cotranslational protein targeting to membrane         |                  |                   |  |   |
| GO:0006613 |     | 1.26775622401036e-11                                                | 61.5510204081633 | 0.198048577953083 |  |   |
| 8          | 106 | cotranslational protein targeting to membrane                       |                  |                   |  |   |
| GO:0045047 |     | 1.26775622401036e-11                                                | 61.5510204081633 | 0.198048577953083 |  |   |
| 8          | 106 | protein targeting to ER                                             |                  |                   |  |   |
| GO:0072599 |     | 1.26775622401036e-11                                                | 61.5510204081633 | 0.198048577953083 |  |   |
| 8          | 106 | establishment of protein localization to endoplasmic reticulum      |                  |                   |  |   |
| GO:0070972 |     | 3.03203010637571e-11                                                | 54.7904306220096 | 0.220469171683621 |  |   |
| 8          | 118 | protein localization to endoplasmic reticulum                       |                  |                   |  |   |
| GO:0000184 |     | 3.24673383521069e-11                                                | 54.2930298719772 | 0.222337554494499 |  |   |
| 8          | 119 | nuclear-transcribed mRNA catabolic process, nonsense-mediated decay |                  |                   |  |   |
| GO:0072594 |     | 7.01935279172028e-11                                                | 36.4846153846154 | 0.381150093419141 |  |   |
| 9          | 204 | establishment of protein localization to organelle                  |                  |                   |  |   |
| GO:0019080 |     | 2.21326302210561e-10                                                | 42.0493191019507 | 0.282125804442599 |  |   |
| 8          | 151 | viral genome expression                                             |                  |                   |  |   |
| GO:0019083 |     | 2.21326302210561e-10                                                | 42.0493191019507 | 0.282125804442599 |  |   |
| 8          | 151 | viral transcription                                                 |                  |                   |  |   |
| GO:0006612 |     | 2.45931590628955e-10                                                | 41.4635208711434 | 0.285862570064355 |  |   |
| 8          | 153 | protein targeting to membrane                                       |                  |                   |  |   |
| GO:0043624 |     | 2.45931590628955e-10                                                | 41.4635208711434 | 0.285862570064355 |  |   |
| 8          | 153 | cellular protein complex disassembly                                |                  |                   |  |   |
| GO:0043241 |     | 3.1811205942258e-10                                                 | 40.0673684210526 | 0.295204484118746 |  |   |
| 8          | 158 | protein complex disassembly                                         |                  |                   |  |   |
| GO:0000956 |     | 5.44445628484361e-10                                                | 37.3010787839163 | 0.315756695038406 |  |   |
| 8          | 169 | nuclear-transcribed mRNA catabolic process                          |                  |                   |  |   |
| GO:0034623 |     | 6.86790688362788e-10                                                | 36.1648700063412 | 0.325098609092796 |  |   |
| 8          | 174 | cellular macromolecular complex disassembly                         |                  |                   |  |   |
| GO:0006402 |     | 8.22921123361849e-10                                                | 35.3040247678019 | 0.332572140336309 |  |   |
| 8          | 178 | mRNA catabolic process                                              |                  |                   |  |   |
| GO:0032984 |     | 8.6040489338959e-10                                                 | 35.0951061865189 | 0.334440523147187 |  |   |
| 8          | 179 | macromolecular complex disassembly                                  |                  |                   |  |   |
| GO:0006401 |     | 2.52017424606074e-09                                                | 30.4076943628106 | 0.383018476230019 |  |   |
| 8          | 205 | RNA catabolic process                                               |                  |                   |  |   |
| GO:0019058 |     | 6.4533641082341e-09                                                 | 26.8133113051688 | 0.43159642931285  |  |   |
| 8          | 231 | viral infectious cycle                                              |                  |                   |  |   |
| GO:0022415 |     | 1.62842937280258e-08                                                | 23.6791979949875 | 0.485779530828316 |  |   |
| 8          | 260 | viral reproductive process                                          |                  |                   |  |   |
| GO:0071845 |     | 3.23747950135079e-08                                                | 21.58352402746   | 0.530620718289392 |  | 8 |
| 284        |     | cellular component disassembly at cellular level                    |                  |                   |  |   |
| GO:0022411 |     | 3.60866072584282e-08                                                | 21.2691729323308 | 0.538094249532904 |  |   |
| 8          | 288 | cellular component disassembly                                      |                  |                   |  |   |
| GO:0016032 |     | 7.37343343458781e-08                                                | 15.816742081448  | 0.842640647706041 |  | 9 |
| 451        |     | viral reproduction                                                  |                  |                   |  |   |
| GO:0033365 |     | 1.10786645196307e-07                                                | 15.0431034482759 | 0.88374506954536  |  |   |
| 9          | 473 | protein localization to organelle                                   |                  |                   |  |   |
| GO:0006605 |     | 1.12801165729686e-07                                                | 15.0096774193548 | 0.885613452356238 |  |   |
| 9          | 474 | protein targeting                                                   |                  |                   |  |   |

Tissue: Lung=>Muscle\_Skeletal Type: asymmetric

SourceGene: DCTN1(ENSG00000204843.7)

| TargetGeneSet: | GNL2    | C1orf109  | DPH2     | SORT1    | LRIF1    | PFDN2    | PAPPA2  |          |          |      |
|----------------|---------|-----------|----------|----------|----------|----------|---------|----------|----------|------|
| TIMM17A        | BROX    | SRSF7     | PSME4    | RAB1A    | CNNM3    | MKI67IP  | NUP35   | ANKAR    | MARS2    |      |
| C2orf47        | PPIL3   | WDR12     | STK36    | RAMP1    | LSM3     | ARF4     | MITF    | CCDC58   | ABTB1    | UBA5 |
| USP13          | GRPEL1  | GPR125    | ATP8A1   | OCIAD1   | PAICS    | EGF      | GAB1    | ANAPC10  | CLPTM1L  |      |
| BRIX1          | C5orf43 | SRFBP1    | PPP2CA   | HSPA9    | MRPL22   | PAK1IP1  | TPMT    | HLA-DMA  | PPIL1    |      |
| MAD2L1BP       |         | PHF3      | NDUF4F4  | HECA     | LTV1     | MALSU1   | FKBP14  | GGCT     | GATSL2   |      |
| ASB15          | MKRN1   | SORBS3    | FAM219A  | DNAJB5   | SEC61B   | MRPL50   | DPM2    | ZER1     | ZNF25    |      |
| TIMM23         | PPIF    | PGAM1     | MXI1     | RP11     | HIPK3    | FIBP     | DNAJB13 | TMEM126A |          |      |
| ARHGAP42       |         | NOP2      | DTX3     | CDK4     | CTDSP2   | CCT2     | COX6A1  | TBC1D4   | ZBTB25   |      |
| BCRP2          | COX16   | CINP      | CTD      | UNKL     | C16orf91 |          | IFT140  | NPIPP1   | MPHOSPH6 |      |
| TIMM22         | ANKFY1  | C1QBP     | ATP1B2   | ERAL1    | MAP3K3   | DDX5     | MEP1B   | MRPL4    | ANKRD27  |      |
| TIMM50         | SRSF6   | SDC4      | ATP5E    | FBXW11P1 |          | C21orf33 |         | RP3      | PLA2G6   |      |
| NHP2L1         |         |           |          |          |          |          |         |          |          |      |
| GOBPID         | Pvalue  | OddsRatio | ExpCount | Count    | Size     | Term     |         |          |          |      |

Stable4\_20PerPair

|                                                                     |                                                                     |                  |                     |
|---------------------------------------------------------------------|---------------------------------------------------------------------|------------------|---------------------|
| GO:0006457                                                          | 1.34450967259763e-07                                                | 9.26133254015467 | 1.39007681129334    |
| 11 216                                                              | protein folding                                                     |                  |                     |
| GO:0022613                                                          | 1.79241599838792e-06                                                | 7.92546931913701 | 1.44799667843056    |
| 10 225                                                              | ribonucleoprotein complex biogenesis                                |                  |                     |
| GO:0071843                                                          | 3.0822405348495e-06                                                 | 7.43357710317252 | 1.5380942495329 10  |
| 239                                                                 | cellular component biogenesis at cellular level                     |                  |                     |
| GO:0006839                                                          | 4.65300458254365e-06                                                | 11.966794533685  | 0.669296242474569 7 |
| 104                                                                 | mitochondrial transport                                             |                  |                     |
| GO:0042254                                                          | 5.14077077224417e-06                                                | 9.48986232790989 | 0.958895578160681   |
| 8 149                                                               | ribosome biogenesis                                                 |                  |                     |
| GO:0006626                                                          | 1.84154687313195e-05                                                | 17.6778656126482 | 0.32821258044426    |
| 5 51                                                                | protein targeting to mitochondrion                                  |                  |                     |
| Tissue: Lung=>Muscle_skeletal                                       | Type: cluster                                                       |                  |                     |
| SourceGene:                                                         | DCTN1(ENSG00000204843.7)                                            |                  |                     |
| TargetGeneSet:                                                      | GNL2 C1orf109 DPH2 SORT1 LRIF1 PFDN2 PAPP2                          |                  |                     |
| TIMM17A BROX SRSF7 PSME4 RAB1A CNM3 MKI67IP NUP35 ANKAR MARS2       |                                                                     |                  |                     |
| C2orf47 PPIL3 WDR12 STK36 RAMP1 LSM3 ARF4 MITF CCDC58 ABTB1 UBA5    |                                                                     |                  |                     |
| USP13 GRPEL1 GPR125 ATP8A1 OCIAD1 PAICS EGF GAB1 ANAPC10 CLPTM1L    |                                                                     |                  |                     |
| BRIX1 C5orf43 SRFBP1 PPP2CA HSPA9 MRPL22 PAK1IP1 TPMT HLA-DMA PPIL1 |                                                                     |                  |                     |
| MAD2L1BP PHF3 NDUFAF4 HECA LTV1 MALSU1 FKBP14 GGCT GATSL2           |                                                                     |                  |                     |
| ASB15 MKRN1 SORBS3 FAM219A DNAJB5 SEC61B MRPL50 DPM2 ZER1 ZNF25     |                                                                     |                  |                     |
| TIMM23 PPIF PGAM1 MXI1 RP11 HIPK3 FIBP DNAJB13 TMEM126A             |                                                                     |                  |                     |
| ARHGAP42 NOP2 DTX3 CDK4 CTDSP2 CCT2 COX6A1 TBC1D4 ZBTB25            |                                                                     |                  |                     |
| BCRP2 COX16 CINP CTD UNKL C16orf91 IFT140 NPIPP1 MPHOSPH6           |                                                                     |                  |                     |
| TIMM22 ANKFY1 C1QBP ATP1B2 ERAL1 MAP3K3 DDX5 MEP1B MRPL4 ANKRD27    |                                                                     |                  |                     |
| TIMM50 SRSF6 SDC4 ATP5E FBXW11P1 C21orf33 RP3 PLA2G6                |                                                                     |                  |                     |
| NHP2L1                                                              |                                                                     |                  |                     |
| GOBPID                                                              | Pvalue                                                              | OddsRatio        | ExpCount            |
| GO:0006457                                                          | 1.34450967259763e-07                                                | 9.26133254015467 | 1.39007681129334    |
| 11 216                                                              | protein folding                                                     |                  |                     |
| GO:0022613                                                          | 1.79241599838792e-06                                                | 7.92546931913701 | 1.44799667843056    |
| 10 225                                                              | ribonucleoprotein complex biogenesis                                |                  |                     |
| GO:0071843                                                          | 3.0822405348495e-06                                                 | 7.43357710317252 | 1.5380942495329 10  |
| 239                                                                 | cellular component biogenesis at cellular level                     |                  |                     |
| GO:0006839                                                          | 4.65300458254365e-06                                                | 11.966794533685  | 0.669296242474569 7 |
| 104                                                                 | mitochondrial transport                                             |                  |                     |
| GO:0042254                                                          | 5.14077077224417e-06                                                | 9.48986232790989 | 0.958895578160681   |
| 8 149                                                               | ribosome biogenesis                                                 |                  |                     |
| GO:0006626                                                          | 1.84154687313195e-05                                                | 17.6778656126482 | 0.32821258044426    |
| 5 51                                                                | protein targeting to mitochondrion                                  |                  |                     |
| Tissue: Muscle_skeletal=>Lung                                       | Type: asymmetric                                                    |                  |                     |
| SourceGene:                                                         | EIF1AY(ENSG00000198692.5)                                           |                  |                     |
| TargetGeneSet:                                                      | EIF2B4 UBC DYSF IL18RAP LIPA CXCR1 TBC1D5 ALAS1                     |                  |                     |
| RPL24 TMED10P2 UTS2D RP11 BTF3 NSA2 TBCA KRT8P32 ETF1               |                                                                     |                  |                     |
| PCDHGB7 RPS14 SRPK1 SKAP2 IMPDH1 EEF1D BAAT EDF1 RPL27A SBF2 CTSF   |                                                                     |                  |                     |
| RPL36A TARSL2 C16orf5 RPL17 CALR FFAR2 SNRPD2 RPL18 RPL13A          |                                                                     |                  |                     |
| GOBPID                                                              | Pvalue                                                              | OddsRatio        | ExpCount            |
| GO:0006415                                                          | 1.67918420777686e-11                                                | 57.574297188755  | 0.201508546121376 8 |
| 91                                                                  | translational termination                                           |                  |                     |
| GO:0006414                                                          | 5.39567704313388e-11                                                | 49.2164948453608 | 0.23250986090928    |
| 8 105                                                               | translational elongation                                            |                  |                     |
| GO:0000184                                                          | 1.48643933171072e-10                                                | 42.966966966967  | 0.263511175697184 8 |
| 119                                                                 | nuclear-transcribed mRNA catabolic process, nonsense-mediated decay |                  |                     |
| GO:0006413                                                          | 1.05747743506729e-09                                                | 33.0439814814815 | 0.336585703411529   |
| 8 152                                                               | translational initiation                                            |                  |                     |
| GO:0043624                                                          | 1.11416252329696e-09                                                | 32.8137931034483 | 0.338800083039236   |
| 8 153                                                               | cellular protein complex disassembly                                |                  |                     |
| GO:0043241                                                          | 1.43893936799346e-09                                                | 31.7088888888889 | 0.349871981177773   |
| 8 158                                                               | protein complex disassembly                                         |                  |                     |
| GO:0000956                                                          | 2.45436106968739e-09                                                | 29.51966873706   | 0.374230157082555 8 |
| 169                                                                 | nuclear-transcribed mRNA catabolic process                          |                  |                     |
| GO:0006614                                                          | 2.53183530314578e-09                                                | 40.9171428571429 | 0.23250986090928    |
| 7 105                                                               | SRP-dependent cotranslational protein targeting to membrane         |                  |                     |

Stable4\_20PerPair

|                               |                                                                |                  |                   |
|-------------------------------|----------------------------------------------------------------|------------------|-------------------|
| GO:0006613                    | 2.70673351802074e-09                                           | 40.5010101010101 | 0.234724240536987 |
| 7 106                         | cotranslational protein targeting to membrane                  |                  |                   |
| GO:0045047                    | 2.70673351802074e-09                                           | 40.5010101010101 | 0.234724240536987 |
| 7 106                         | protein targeting to ER                                        |                  |                   |
| GO:0072599                    | 2.70673351802074e-09                                           | 40.5010101010101 | 0.234724240536987 |
| 7 106                         | establishment of protein localization to endoplasmic reticulum |                  |                   |
| GO:0034623                    | 3.0912646162229e-09                                            | 28.6204819277108 | 0.385302055221092 |
| 8 174                         | cellular macromolecular complex disassembly                    |                  |                   |
| GO:0006402                    | 3.69940779345068e-09                                           | 27.9392156862745 | 0.394159573731922 |
| 8 178                         | mRNA catabolic process                                         |                  |                   |
| GO:0032984                    | 3.86671722201437e-09                                           | 27.7738791423002 | 0.396373953359629 |
| 8 179                         | macromolecular complex disassembly                             |                  |                   |
| GO:0070972                    | 5.74981541988534e-09                                           | 36.0922522522523 | 0.261296796069476 |
| 7 118                         | protein localization to endoplasmic reticulum                  |                  |                   |
| GO:0006401                    | 1.1234998341734e-08                                            | 24.0642978003384 | 0.453947823680022 |
| 8 205                         | RNA catabolic process                                          |                  |                   |
| GO:0019058                    | 2.85383685772976e-08                                           | 21.219730941704  | 0.511521694000415 |
| 231                           | viral infectious cycle                                         |                  | 8                 |
| GO:0019080                    | 3.19859803578109e-08                                           | 27.7569444444444 | 0.334371323783821 |
| 7 151                         | viral genome expression                                        |                  |                   |
| GO:0019083                    | 3.19859803578109e-08                                           | 27.7569444444444 | 0.334371323783821 |
| 7 151                         | viral transcription                                            |                  |                   |
| GO:0006612                    | 3.50308231415754e-08                                           | 27.3728767123288 | 0.338800083039236 |
| 7 153                         | protein targeting to membrane                                  |                  |                   |
| GO:0022415                    | 7.13683891621245e-08                                           | 18.739417989418  | 0.575738703203931 |
| 260                           | viral reproductive process                                     |                  | 8                 |
| GO:0071845                    | 1.40834573230078e-07                                           | 17.0809178743961 | 0.628883814268909 |
| 8 284                         | cellular component disassembly at cellular level               |                  |                   |
| GO:0022411                    | 1.56786621481419e-07                                           | 16.8321428571429 | 0.637741332779738 |
| 8 288                         | cellular component disassembly                                 |                  |                   |
| GO:0072594                    | 2.51491040811721e-07                                           | 20.2140101522843 | 0.451733444052315 |
| 7 204                         | establishment of protein localization to organelle             |                  |                   |
| GO:0016032                    | 4.60034359857129e-06                                           | 10.5161775771257 | 0.998685212096049 |
| 8 451                         | viral reproduction                                             |                  |                   |
| GO:0033365                    | 6.53335266389927e-06                                           | 10.0028673835125 | 1.04740156390561  |
| 8 473                         | protein localization to organelle                              |                  |                   |
| GO:0006605                    | 6.63550110170467e-06                                           | 9.98068669527897 | 1.04961594353332  |
| 8 474                         | protein targeting                                              |                  |                   |
| Tissue: Lung=>Muscle_Skeletal | Type: asymmetric                                               |                  |                   |
| SourceGene:                   | ENSG00000217643.1                                              |                  |                   |
| TargetGeneSet:                | ACAP3 TNFRSF25 CROCCP3 Clorf63 CPT2 DOCK7 SGIP1 RP4            |                  |                   |
| HFM1 MTMR11                   | FAM189B PEX19 B4GALT3 KCNF1 MSH6 STON1 GFPT1 POLR1A            |                  |                   |
| ARL6IP6 RFTN2                 | SLC23A3 TAMM41 KIAA1143 CCDC12 RRP9 PPP4R2 UBA5 RP11           |                  |                   |
| PARL ZNF718                   | HGFAC OCIAD1 EXOSC9 GAB1 TMA16 LPCAT1 YTHDC2 SRFBP1            |                  |                   |
| SLC23A2 IK                    | NHLRC1 HCG20 RP1 TRMT11 HECA VIP NSUN5 CLIP2                   |                  |                   |
| AGAP3 GNRH1                   | PPP2R2A GDAP1 NOL6 FANCC XPA STXBP1 FPGS URM1                  |                  |                   |
| C9orf106                      | USP20 EXOSC2 EDF1 SLC34A3 ARHGAP21 ECD SEC23IP                 |                  |                   |
| KCNQ1-AS1                     | DNAJC24 PEX16 FNBP4 BEST1 ANKRD13D TCIRG1 ATG16L2              |                  |                   |
| SRSF8 TECTA                   | RARG NPFF AVIL THAP2 SNRPF U4 FAM207BP                         |                  |                   |
| MRP63 NUPL1                   | STK24-AS1 FAM70B C14orf21 SCFD1 SOCS6 ZBTB1 ERH                |                  |                   |
| ABCD4 ACYP1                   | C15orf44 COMMD4 FAM103A1 MRPL28 ALG1 PMM2 MAZ                  |                  |                   |
| ITGAX CCDC102A                | KATNB1 DYNC1LI2 KLHDC4 TRAPPC2L SNORD68 PIGS                   |                  |                   |
| TBC1D3 KLHL11                 | VPS25 ALYREF ENOSF1 RNMT CABLES1 IMPACT CXXC1 CIRBP CAPS       |                  |                   |
| PDE4A SAMD1                   | MEF2BNB URI1 WDR88 MED29 TIMM50 RUVBL2 MBOAT7 TMEM238          |                  |                   |
| ZNF667 MZF1                   | ANKRD5 CBFA2T2 PABPC1L STX16 USP16 C21orf67 RAB9A              |                  |                   |
| FAM3C2 RBM3                   | HSD17B10 TSR2 HNRNP2 FERP1                                     |                  |                   |
| GOBPID                        | Pvalue OddsRatio ExpCount Count Size Term                      |                  |                   |
| GO:0071843                    | 1.54298032144831e-06                                           | 7.09411549707602 | 1.76963531935506  |
| 11 239                        | cellular component biogenesis at cellular level                |                  |                   |
| Tissue: Lung=>Muscle_Skeletal | Type: cluster                                                  |                  |                   |
| SourceGene:                   | ENSG00000217643.1                                              |                  |                   |
| TargetGeneSet:                | ACAP3 TNFRSF25 CROCCP3 Clorf63 CPT2 DOCK7 SGIP1 RP4            |                  |                   |
| HFM1 MTMR11                   | FAM189B PEX19 B4GALT3 KCNF1 MSH6 STON1 GFPT1 POLR1A            |                  |                   |

Stable4\_20PerPair

|            |          |           |                                                             |                  |           |                      |                  |                    |          |                     |       |        |
|------------|----------|-----------|-------------------------------------------------------------|------------------|-----------|----------------------|------------------|--------------------|----------|---------------------|-------|--------|
| ARL6IP6    | RFTN2    | SLC23A3   | TAMM41                                                      | KIAA1143         | CCDC12    | RRP9                 | PPP4R2           | UBA5               | RP11     |                     |       |        |
| PARL       | ZNF718   | HGFAC     | OCIAD1                                                      | EXOSC9           | GAB1      | TMA16                | LPCAT1           | YTHDC2             | SRFBP1   |                     |       |        |
| SLC23A2    | IK       | NHLRC1    | HCG20                                                       | RP1              | TRMT11    | HECA                 | VIP              | NSUN5              | CLIP2    |                     |       |        |
| AGAP3      | GNRH1    | PPP2R2A   | GDAP1                                                       | NOL6             | FANCC     | XPA                  | STXBP1           | FPGS               | URM1     |                     |       |        |
| C9orf106   |          | USP20     | EXOSC2                                                      | EDF1             | SLC34A3   | ARHGAP21             |                  | ECD                | SEC23IP  |                     |       |        |
| KCNQ1-AS1  |          | DNAJC24   | PEX16                                                       | FNBP4            | BEST1     | ANKRD13D             |                  | TCIRG1             | ATG16L2  |                     |       |        |
| SRSF8      | TECTA    | RARG      | NPFF                                                        | AVIL             | THAP2     | SNRPF                | U4               | FAM207BP           |          |                     |       |        |
| MRP63      | NUPL1    | STK24-AS1 |                                                             | FAM70B           | C14orf21  |                      | SCFD1            | SOCS6              | ZBTB1    |                     |       |        |
| ABCD4      | ACYP1    | C15orf44  |                                                             | COMMD4           | FAM103A1  |                      | MRPL28           | ALG1               | PMM2     |                     |       |        |
| ITGAX      | CCDC102A |           | KATNB1                                                      | DYNC1LI2         |           | KLHDC4               | TRAPPC2L         |                    | SNORD68  |                     |       |        |
| TBC1D3     | KLHL11   | VPS25     | ALYREF                                                      | ENOSF1           | RNMT      | CABLES1              | IMPACT           | CXXC1              | CIRBP    |                     |       |        |
| PDE4A      | SAMD1    | MEF2BNB   | URI1                                                        | WDR88            | MED29     | TIMM50               | RUVBL2           | MBOAT7             | TMEM238  |                     |       |        |
| ZNF667     | MZF1     | ANKRD5    | CBFA2T2                                                     | PABPC1L          | STX16     | USP16                | C21orf67         |                    | RAB9A    |                     |       |        |
| FAM3C2     | RBM3     | HSD17B10  |                                                             | TSR2             | HNRNPH2   | FERP1                |                  |                    |          |                     |       |        |
| GOBPID     | Pvalue   | OddsRatio |                                                             | ExpCount         |           | Count                | Size             | Term               |          |                     |       |        |
| GO:0071843 | 11       | 239       | 1.54298032144831e-06                                        | 7.09411549707602 |           |                      |                  | 1.76963531935506   |          |                     |       |        |
|            |          |           | cellular component biogenesis at cellular level             |                  |           |                      |                  |                    |          |                     |       |        |
|            |          |           | Tissue: Lung=>Muscle_skeletal Type: asymmetric              |                  |           |                      |                  |                    |          |                     |       |        |
|            |          |           | SourceGene: OCA2(ENSG00000104044.10)                        |                  |           |                      |                  |                    |          |                     |       |        |
|            |          |           | TargetGeneSet:                                              | CPT2             | THEM5     | CHTOP                | KLHL29           | RAB10              | MGAT4A   | MFF                 | RP11  | LDB2   |
|            |          |           | RASGRF2                                                     | EIF4EBP3         | GEMIN5    | TSPYL4               | RSP03            | FAM220A            | TSPAN13  | TRGC1               | DBNL  | CDK6   |
|            |          |           | ACHE                                                        | PPP2R2A          | PDP1      | KIAA2026             | FRMD3            | USP20              | FAM78A   | ARRDC1              | BMI1  | KLLN   |
|            |          |           | BET1L                                                       | MAP4K2           | SIPA1     | ANKRD42              | FLI1             | EFNB2              | RHOJ     | CTD                 | FMN1  | CD2BP2 |
|            |          |           | DYNC1LI2                                                    |                  | AKAP1     | ZFP161               | SOGA2            | LONP1              | SAMD1    | MEF2BNB             | URI1  | ERCC2  |
|            |          |           | RUVBL2                                                      | PRPF6            | H1FO      | GSPT2                |                  |                    |          |                     |       |        |
|            |          |           | GOBPID                                                      | Pvalue           | OddsRatio | ExpCount             | Count            | Size               | Term     |                     |       |        |
|            |          |           | GO:0000244                                                  | 4                | 31        | 3.61442722939206e-07 | 400.25           | 0.0161926510276105 |          | 3                   | 6     |        |
|            |          |           | assembly of spliceosomal tri-snRNP                          |                  |           |                      |                  |                    |          |                     |       |        |
|            |          |           | GO:0000387                                                  | 4                | 31        | 1.35215838565712e-06 | 60.8888888888889 |                    |          | 0.0836620303093212  |       |        |
|            |          |           | spliceosomal snRNP assembly                                 |                  |           |                      |                  |                    |          |                     |       |        |
|            |          |           | Tissue: Muscle_skeletal=>Lung Type: asymmetric              |                  |           |                      |                  |                    |          |                     |       |        |
|            |          |           | SourceGene: OR7C1(ENSG00000127530.2)                        |                  |           |                      |                  |                    |          |                     |       |        |
|            |          |           | TargetGeneSet:                                              | RP11             | CD53      | SETP9                | ARHGAP30         |                    | TRAF3IP3 |                     | WIPF1 |        |
|            |          |           | EEF1A1P25                                                   | TMED11P          | IRF2      | DOCK2                | BTN3A2           | IKZF1              | FDPSP2   | NCKAP1L             | ARL11 |        |
|            |          |           | SLC7A7                                                      | SNX20            | EVI2B     | PRR22                | CD37             | SASH3              |          |                     |       |        |
|            |          |           | GOBPID                                                      | Pvalue           | OddsRatio | ExpCount             | Count            | Size               | Term     |                     |       |        |
|            |          |           | GO:0046631                                                  | 4                | 82        | 9.23103529146026e-07 | 73.6358974358974 |                    |          | 0.0794408691440039  |       |        |
|            |          |           | alpha-beta T cell activation                                |                  |           |                      |                  |                    |          |                     |       |        |
|            |          |           | GO:0046638                                                  | 3                | 30        | 2.89385018698768e-06 | 145.555555555556 |                    |          | 0.02906373261366    |       |        |
|            |          |           | positive regulation of alpha-beta T cell differentiation    |                  |           |                      |                  |                    |          |                     |       |        |
|            |          |           | GO:0046637                                                  | 3                | 40        | 7.00204710918774e-06 | 106.142506142506 |                    |          | 0.0387516434848799  |       |        |
|            |          |           | regulation of alpha-beta T cell differentiation             |                  |           |                      |                  |                    |          |                     |       |        |
|            |          |           | GO:0046635                                                  | 3                | 43        | 8.7311967723947e-06  | 98.1613636363636 |                    |          | 0.0416580167462459  |       |        |
|            |          |           | positive regulation of alpha-beta T cell activation         |                  |           |                      |                  |                    |          |                     |       |        |
|            |          |           | GO:0030217                                                  | 4                | 156       | 1.20235178036476e-05 | 37.5921052631579 |                    |          | 0.151131409591032   |       |        |
|            |          |           | T cell differentiation                                      |                  |           |                      |                  |                    |          |                     |       |        |
|            |          |           | GO:0045582                                                  | 3                | 53        | 1.64793124999097e-05 | 78.4745454545454 |                    |          | 0.0513459276174659  |       |        |
|            |          |           | positive regulation of T cell differentiation               |                  |           |                      |                  |                    |          |                     |       |        |
|            |          |           | GO:0002639                                                  | 2                | 7         | 1.82525001619232e-05 | 481.066666666667 |                    |          | 0.00678153760985399 |       |        |
|            |          |           | positive regulation of immunoglobulin production            |                  |           |                      |                  |                    |          |                     |       |        |
|            |          |           | GO:0046634                                                  | 3                | 55        | 1.84342500519685e-05 | 75.4458041958042 |                    |          | 0.0532835097917099  |       |        |
|            |          |           | regulation of alpha-beta T cell activation                  |                  |           |                      |                  |                    |          |                     |       |        |
|            |          |           | Tissue: Muscle_skeletal=>Lung Type: asymmetric              |                  |           |                      |                  |                    |          |                     |       |        |
|            |          |           | SourceGene: RASA3-IT1(ENSG00000232487.1)                    |                  |           |                      |                  |                    |          |                     |       |        |
|            |          |           | TargetGeneSet:                                              | RPL11            | RP11      | RPL32                | LNP1             | RPL35A             | GNPDA2   | FAM198B             | RPL37 |        |
|            |          |           | ARHGAP26                                                    | RPS14            | RPL30     | RPL35                | DNAJC9           | PRKRIR             | COX16    | RPS21               | CRLF2 |        |
|            |          |           | GOBPID                                                      | Pvalue           | OddsRatio | ExpCount             | Count            | Size               | Term     |                     |       |        |
|            |          |           | GO:0006415                                                  | 8                | 91        | 5.2570415996395e-15  | 230.586345381526 |                    |          | 0.0881599889281019  |       |        |
|            |          |           | translational termination                                   |                  |           |                      |                  |                    |          |                     |       |        |
|            |          |           | GO:0006414                                                  | 8                | 105       | 1.71575130044712e-14 | 197.113402061856 |                    |          | 0.10172306414781    |       |        |
|            |          |           | translational elongation                                    |                  |           |                      |                  |                    |          |                     |       |        |
|            |          |           | GO:0006614                                                  | 8                | 105       | 1.71575130044712e-14 | 197.113402061856 |                    |          | 0.10172306414781    |       |        |
|            |          |           | SRP-dependent cotranslational protein targeting to membrane |                  |           |                      |                  |                    |          |                     |       |        |

Stable4\_20PerPair

|                                                                  |                                                                |                                                                     |                     |       |
|------------------------------------------------------------------|----------------------------------------------------------------|---------------------------------------------------------------------|---------------------|-------|
| GO:0006613                                                       | 1.85512348484428e-14                                           | 195.08843537415                                                     | 0.102691855234932   | 8     |
| 106                                                              | cotranslational protein targeting to membrane                  |                                                                     |                     |       |
| GO:0045047                                                       | 1.85512348484428e-14                                           | 195.08843537415                                                     | 0.102691855234932   | 8     |
| 106                                                              | protein targeting to ER                                        |                                                                     |                     |       |
| GO:0072599                                                       | 1.85512348484428e-14                                           | 195.08843537415                                                     | 0.102691855234932   | 8     |
| 106                                                              | establishment of protein localization to endoplasmic reticulum |                                                                     |                     |       |
| GO:0070972                                                       | 4.47983465610689e-14                                           | 173.660606060606                                                    | 0.114317348280396   |       |
| 8                                                                | 118                                                            | protein localization to endoplasmic reticulum                       |                     |       |
| GO:0000184                                                       | 4.80092081827107e-14                                           | 172.084084084084                                                    | 0.115286139367518   |       |
| 8                                                                | 119                                                            | nuclear-transcribed mRNA catabolic process, nonsense-mediated decay |                     |       |
| GO:0019080                                                       | 3.35814083575264e-13                                           | 133.277389277389                                                    | 0.146287454155422   |       |
| 8                                                                | 151                                                            | viral genome expression                                             |                     |       |
| GO:0019083                                                       | 3.35814083575264e-13                                           | 133.277389277389                                                    | 0.146287454155422   |       |
| 8                                                                | 151                                                            | viral transcription                                                 |                     |       |
| GO:0006413                                                       | 3.54338439066552e-13                                           | 132.342592592593                                                    | 0.147256245242544   |       |
| 8                                                                | 152                                                            | translational initiation                                            |                     |       |
| GO:0006612                                                       | 3.73748925539744e-13                                           | 131.420689655172                                                    | 0.148225036329666   |       |
| 8                                                                | 153                                                            | protein targeting to membrane                                       |                     |       |
| GO:0043624                                                       | 3.73748925539744e-13                                           | 131.420689655172                                                    | 0.148225036329666   |       |
| 8                                                                | 153                                                            | cellular protein complex disassembly                                |                     |       |
| GO:0043241                                                       | 4.85395133590566e-13                                           | 126.995555555556                                                    | 0.153068991765276   |       |
| 8                                                                | 158                                                            | protein complex disassembly                                         |                     |       |
| GO:0000956                                                       | 8.38147272952354e-13                                           | 118.227743271222                                                    | 0.163725693723618   |       |
| 8                                                                | 169                                                            | nuclear-transcribed mRNA catabolic process                          |                     |       |
| GO:0034623                                                       | 1.06155147079757e-12                                           | 114.626506024096                                                    | 0.168569649159228   |       |
| 8                                                                | 174                                                            | cellular macromolecular complex disassembly                         |                     |       |
| GO:0006402                                                       | 1.2760738371205e-12                                            | 111.898039215686                                                    | 0.172444813507716   |       |
| 8                                                                | 178                                                            | mRNA catabolic process                                              |                     |       |
| GO:0032984                                                       | 1.33527505900153e-12                                           | 111.235867446394                                                    | 0.173413604594838   |       |
| 8                                                                | 179                                                            | macromolecular complex disassembly                                  |                     |       |
| GO:0072594                                                       | 3.83959375516869e-12                                           | 96.8775510204082                                                    | 0.197633381772888   |       |
| 8                                                                | 204                                                            | establishment of protein localization to organelle                  |                     |       |
| GO:0006401                                                       | 3.99402407328448e-12                                           | 96.3790186125212                                                    | 0.19860217286001    |       |
| 8                                                                | 205                                                            | RNA catabolic process                                               |                     |       |
| GO:0019058                                                       | 1.04445206758584e-11                                           | 84.9865470852018                                                    | 0.223790741125182   |       |
| 8                                                                | 231                                                            | viral infectious cycle                                              |                     |       |
| GO:0022415                                                       | 2.69809871595179e-11                                           | 75.0529100529101                                                    | 0.25188568265172    |       |
| 8                                                                | 260                                                            | viral reproductive process                                          |                     |       |
| GO:0071845                                                       | 5.46934795574173e-11                                           | 68.4106280193237                                                    | 0.275136668742648   |       |
| 8                                                                | 284                                                            | cellular component disassembly at cellular level                    |                     |       |
| GO:0022411                                                       | 6.11620460408393e-11                                           | 67.4142857142857                                                    | 0.279011833091136   |       |
| 8                                                                | 288                                                            | cellular component disassembly                                      |                     |       |
| GO:0016032                                                       | 2.15543429215612e-09                                           | 42.1188863807374                                                    | 0.436924780292021   |       |
| 8                                                                | 451                                                            | viral reproduction                                                  |                     |       |
| GO:0033365                                                       | 3.13802233915605e-09                                           | 40.063082437276                                                     | 0.458238184208705   | 8     |
| 473                                                              | protein localization to organelle                              |                                                                     |                     |       |
| GO:0006605                                                       | 3.19068290243744e-09                                           | 39.9742489270386                                                    | 0.459206975295827   |       |
| 8                                                                | 474                                                            | protein targeting                                                   |                     |       |
| GO:0022613                                                       | 1.56277436514447e-06                                           | 35.9015151515151                                                    | 0.21797799460245    |       |
| 5                                                                | 225                                                            | ribonucleoprotein complex biogenesis                                |                     |       |
| GO:0071843                                                       | 2.10343614093234e-06                                           | 33.7203228869896                                                    | 0.231541069822158   |       |
| 5                                                                | 239                                                            | cellular component biogenesis at cellular level                     |                     |       |
| GO:0006364                                                       | 2.39727680017796e-06                                           | 57.348                                                              | 0.100754273060688   | 4 104 |
| rRNA processing                                                  |                                                                |                                                                     |                     |       |
| GO:0016072                                                       | 2.99988324947846e-06                                           | 54.0792452830189                                                    | 0.10656701958342    |       |
| 4                                                                | 110                                                            | rRNA metabolic process                                              |                     |       |
| GO:0042254                                                       | 1.00270629752182e-05                                           | 39.4262068965517                                                    | 0.144349871981178   |       |
| 4                                                                | 149                                                            | ribosome biogenesis                                                 |                     |       |
| GO:0030490                                                       | 1.82525001619232e-05                                           | 481.066666666667                                                    | 0.00678153760985399 |       |
| 2                                                                | 7                                                              | maturation of SSU-rRNA                                              |                     |       |
| Tissue: Lung=>Muscle_skeletal Type: asymmetric                   |                                                                |                                                                     |                     |       |
| SourceGene: RLBP1(ENSG00000140522.7)                             |                                                                |                                                                     |                     |       |
| TargetGeneSet: LRR8D Clorf68 PTPRC LINC00467 RP11 PLEK NGLY1 RP1 |                                                                |                                                                     |                     |       |

Stable4\_20PerPair

| GOBPID                                                           | Pvalue                      | OddsRatio                                                                                                                 | ExpCount         | Count               | Size | Term               |
|------------------------------------------------------------------|-----------------------------|---------------------------------------------------------------------------------------------------------------------------|------------------|---------------------|------|--------------------|
| GO:0007229                                                       | 5.26466458883855e-06        |                                                                                                                           | 42.7440476190476 |                     |      | 0.117638917721957  |
| 4                                                                | 68                          | integrin-mediated signaling pathway                                                                                       |                  |                     |      |                    |
| GO:0008064                                                       | 1.28328803890419e-05        |                                                                                                                           | 33.7330981775426 |                     |      | 0.147048647152446  |
| 4                                                                | 85                          | regulation of actin polymerization or depolymerization                                                                    |                  |                     |      |                    |
| GO:0030832                                                       | 1.34432130162966e-05        |                                                                                                                           | 33.3193960511034 |                     |      | 0.148778631236593  |
| 4                                                                | 86                          | regulation of actin filament length                                                                                       |                  |                     |      |                    |
| GO:0007015                                                       | 1.81297937854322e-05        |                                                                                                                           | 18.7315789473684 |                     |      | 0.337346896408553  |
| 5                                                                | 195                         | actin filament organization                                                                                               |                  |                     |      |                    |
| Tissue: Muscle_Skeletal=>Lung Type: asymmetric                   |                             |                                                                                                                           |                  |                     |      |                    |
| SourceGene: RP11-417L19.4(ENSG00000255992.1)                     |                             |                                                                                                                           |                  |                     |      |                    |
| TargetGeneSet: RP4 CDC20 DEPDC1 WDR26 SGOL1 RP1 HIPK2 RPL3P9 SF1 |                             |                                                                                                                           |                  |                     |      |                    |
| DNAJC12 FZD4 RP11 C15orf41 FAM149B2 PLK1 KIF18B U6               |                             |                                                                                                                           |                  |                     |      |                    |
| GOBPID                                                           | Pvalue                      | OddsRatio                                                                                                                 | ExpCount         | Count               | Size | Term               |
| GO:0060041                                                       | 7.98517850623222e-07        |                                                                                                                           | 79.7166666666667 |                     |      | 0.0780568818766867 |
| 4                                                                | 94                          | retina development in camera-type eye                                                                                     |                  |                     |      |                    |
| GO:0051488                                                       | 1.32441885892811e-05        |                                                                                                                           | 577.36           | 0.00581274652273199 | 2    | 7                  |
| activation of anaphase-promoting complex activity                |                             |                                                                                                                           |                  |                     |      |                    |
| GO:0043010                                                       | 1.85010637569267e-05        |                                                                                                                           | 35.064039408867  | 0.171891218600789   |      | 4                  |
| 207                                                              | camera-type eye development |                                                                                                                           |                  |                     |      |                    |
| Tissue: Muscle_Skeletal=>Lung Type: cluster                      |                             |                                                                                                                           |                  |                     |      |                    |
| SourceGene: RP11-462G12.2(ENSG00000262888.1)                     |                             |                                                                                                                           |                  |                     |      |                    |
| TargetGeneSet: IGKJ5 IGKC IGKJ4 IGKJ3 IGKJ2 IGKJ1 IGKV1-12       |                             |                                                                                                                           |                  |                     |      |                    |
| IGKV1-27 IGKV1-33 IGKV1D-27 TM4SF1-AS1 CHR1 IGJ                  |                             |                                                                                                                           |                  |                     |      |                    |
| CALML5 RP11 IGHG1 IGHG3 IGHJ6 IGHJ5 IGHJ3 IGHV4-34 IGHV5-51      |                             |                                                                                                                           |                  |                     |      |                    |
| KRT10 DSC2 IGLV2-14 IGLL5 IGLC1 IGLC3 IGLC4                      |                             |                                                                                                                           |                  |                     |      |                    |
| GOBPID                                                           | Pvalue                      | OddsRatio                                                                                                                 | ExpCount         | Count               | Size | Term               |
| GO:0006958                                                       | 1.83629841921271e-10        |                                                                                                                           | 266.574074074074 |                     |      | 0.0380596498512214 |
| 5                                                                | 50                          | complement activation, classical pathway                                                                                  |                  |                     |      |                    |
| GO:0006956                                                       | 6.06437703370626e-10        |                                                                                                                           | 206.637931034483 |                     |      | 0.0479551588125389 |
| 5                                                                | 63                          | complement activation                                                                                                     |                  |                     |      |                    |
| GO:0002455                                                       | 7.12155292763391e-10        |                                                                                                                           | 199.722222222222 |                     |      | 0.0494775448065878 |
| 5                                                                | 65                          | humoral immune response mediated by circulating immunoglobulin                                                            |                  |                     |      |                    |
| GO:0072376                                                       | 2.33865100137353e-09        |                                                                                                                           | 155.443722943723 |                     |      | 0.062417825756003  |
| 5                                                                | 82                          | protein activation cascade                                                                                                |                  |                     |      |                    |
| GO:0016064                                                       | 1.08748917995986e-08        |                                                                                                                           | 112.688679245283 |                     |      | 0.0844924226697114 |
| 5                                                                | 111                         | immunoglobulin mediated immune response                                                                                   |                  |                     |      |                    |
| GO:0019724                                                       | 1.24433927273075e-08        |                                                                                                                           | 109.564220183486 |                     |      | 0.0867760016607847 |
| 5                                                                | 114                         | B cell mediated immunity                                                                                                  |                  |                     |      |                    |
| GO:0006959                                                       | 1.75213588880413e-08        |                                                                                                                           | 102.01566951567  | 0.0928655456369801  |      | 5                  |
| 122                                                              | humoral immune response     |                                                                                                                           |                  |                     |      |                    |
| GO:0002449                                                       | 8.47891311072625e-08        |                                                                                                                           | 73.4465020576132 |                     |      | 0.127119230503079  |
| 5                                                                | 167                         | lymphocyte mediated immunity                                                                                              |                  |                     |      |                    |
| GO:0002460                                                       | 1.26787130696983e-07        |                                                                                                                           | 67.5378787878788 |                     |      | 0.137775932461421  |
| 5                                                                | 181                         | adaptive immune response based on somatic recombination of immune receptors built from immunoglobulin superfamily domains |                  |                     |      |                    |
| GO:0002250                                                       | 1.98391196917433e-07        |                                                                                                                           | 61.5155440414508 |                     |      | 0.150716213410837  |
| 5                                                                | 198                         | adaptive immune response                                                                                                  |                  |                     |      |                    |
| GO:0002443                                                       | 2.72274185450078e-07        |                                                                                                                           | 57.5809061488673 |                     |      | 0.160611722372154  |
| 5                                                                | 211                         | leukocyte mediated immunity                                                                                               |                  |                     |      |                    |
| GO:0002253                                                       | 1.52998646745843e-06        |                                                                                                                           | 40.0963718820862 |                     |      | 0.227596706110304  |
| 5                                                                | 299                         | activation of immune response                                                                                             |                  |                     |      |                    |
| GO:0050778                                                       | 4.02276505197398e-06        |                                                                                                                           | 32.6857010213556 |                     |      | 0.277074250916892  |
| 5                                                                | 364                         | positive regulation of immune response                                                                                    |                  |                     |      |                    |
| GO:0002252                                                       | 5.36131152318692e-06        |                                                                                                                           | 30.7502187226597 |                     |      | 0.293820496851429  |
| 5                                                                | 386                         | immune effector process                                                                                                   |                  |                     |      |                    |
| Tissue: Muscle_Skeletal=>Lung Type: asymmetric                   |                             |                                                                                                                           |                  |                     |      |                    |
| SourceGene: RP11-706O15.5(ENSG00000205663.4)                     |                             |                                                                                                                           |                  |                     |      |                    |
| TargetGeneSet: RPL11 RPL5 RPL31 ALDH7A1P2 RPL37A RPL32 RP11      |                             |                                                                                                                           |                  |                     |      |                    |
| RPL35A RPL34 RPL37 CTB PANK3 RPL10A SLC4A2 CHPF2 FAM150A UQCRB   |                             |                                                                                                                           |                  |                     |      |                    |

Stable4\_20PerPair

| RPL30      | POLR2K | SCRIB                | RPS6             | C9orf103          | SLC27A4 | UNC5B                                                               | RPS24   | RPS25             |            |
|------------|--------|----------------------|------------------|-------------------|---------|---------------------------------------------------------------------|---------|-------------------|------------|
| C12orf39   |        | SNORA49              | SAP18            | TPT1              | EGLN3   | POMT2                                                               | MAPKBP1 | RPL4              | FBXO22     |
| PDPK1      | CTD    | PKD1P6               | SLC12A4          | RPL23A            | UBA52   | RPS11                                                               | TMC2    | MAFIPL            | MIS18A-AS1 |
| PNPLA4     | GPC3   |                      |                  |                   |         |                                                                     |         |                   |            |
| GOBPID     | Pvalue | OddsRatio            | ExpCount         | Count             | Size    | Term                                                                |         |                   |            |
| GO:0006415 | 17     | 1.13924126257327e-28 | 164.716216216216 |                   |         | translational termination                                           |         | 0.232994256452841 |            |
| GO:0006414 | 17     | 1.59539864162419e-27 | 138.376136363636 |                   |         | translational elongation                                            |         | 0.268839526676355 |            |
| GO:0006614 | 17     | 1.59539864162419e-27 | 138.376136363636 |                   |         | SRP-dependent cotranslational protein targeting to membrane         |         | 0.268839526676355 |            |
| GO:0006613 | 17     | 1.89763757700381e-27 | 136.811797752809 |                   |         | cotranslational protein targeting to membrane                       |         | 0.271399903120891 |            |
| GO:0045047 | 17     | 1.89763757700381e-27 | 136.811797752809 |                   |         | protein targeting to ER                                             |         | 0.271399903120891 |            |
| GO:0072599 | 17     | 1.89763757700381e-27 | 136.811797752809 |                   |         | establishment of protein localization to endoplasmic reticulum      |         | 0.271399903120891 |            |
| GO:0019080 | 18     | 1.16101996113734e-26 | 101.724574594381 |                   |         | viral genome expression                                             |         | 0.386616843125043 |            |
| GO:0019083 | 18     | 1.16101996113734e-26 | 101.724574594381 |                   |         | viral transcription                                                 |         | 0.386616843125043 |            |
| GO:0070972 | 17     | 1.3368781209105e-26  | 120.455940594059 |                   |         | protein localization to endoplasmic reticulum                       |         | 0.302124420455332 |            |
| GO:0000184 | 17     | 1.55763730660219e-26 | 119.266666666667 |                   |         | nuclear-transcribed mRNA catabolic process, nonsense-mediated decay |         | 0.304684796899869 |            |
| GO:0006413 | 17     | 1.25360192660306e-24 | 89.9048148148148 |                   |         | translational initiation                                            |         | 0.38917721956958  |            |
| GO:0006612 | 17     | 1.40844113849234e-24 | 89.2375          | 0.391737596014117 |         | protein targeting to membrane                                       | 17      | 153               |            |
| GO:0043624 | 17     | 1.40844113849234e-24 | 89.2375          | 0.391737596014117 |         | cellular protein complex disassembly                                | 17      | 153               |            |
| GO:0043241 | 158    | 2.49139715694258e-24 | 86.0429078014184 |                   |         | protein complex disassembly                                         |         | 0.4045394782368   | 17         |
| GO:0000956 | 17     | 8.18727855160578e-24 | 79.7546052631579 |                   |         | nuclear-transcribed mRNA catabolic process                          |         | 0.432703619126704 |            |
| GO:0034623 | 17     | 1.3685780068508e-23  | 77.1875796178344 |                   |         | cellular macromolecular complex disassembly                         |         | 0.445505501349388 |            |
| GO:0006402 | 17     | 2.04134419859622e-23 | 75.2487577639751 |                   |         | mRNA catabolic process                                              |         | 0.455747007127534 |            |
| GO:0032984 | 179    | 2.25257810251158e-23 | 74.779012345679  | 0.458307383572071 |         | macromolecular complex disassembly                                  |         | 17                |            |
| GO:0019058 | 18     | 3.21621458870359e-23 | 63.1623424759081 |                   |         | viral infectious cycle                                              |         | 0.59144695868798  |            |
| GO:0072594 | 17     | 2.22050743212406e-22 | 64.6681818181818 |                   |         | establishment of protein localization to organelle                  |         | 0.522316794685489 |            |
| GO:0006401 | 17     | 2.41809254046337e-22 | 64.3196808510638 |                   |         | RNA catabolic process                                               |         | 0.524877171130026 |            |
| GO:0022415 | 260    | 2.81584247458275e-22 | 55.479773814702  | 0.665697875579545 |         | viral reproductive process                                          |         | 18                |            |
| GO:0071845 | 284    | 6.73842211348502e-20 | 45.037265917603  | 0.727146910248426 |         | cellular component disassembly at cellular level                    |         | 17                |            |
| GO:0022411 | 288    | 8.56072118352137e-20 | 44.359963099631  | 0.737388416026573 |         | cellular component disassembly                                      |         | 17                |            |
| GO:0016032 | 18     | 5.77770676639793e-18 | 30.5892792026255 |                   |         | viral reproduction                                                  |         | 1.15472977648606  |            |
| GO:0033365 | 473    | 3.72077288339009e-16 | 26.018201754386  | 1.21105805826586  |         | protein localization to organelle                                   |         | 17                |            |
| GO:0006605 | 6      | 3.8539867726553e-16  | 25.959409190372  | 1.2136184347104   | 17      | protein targeting                                                   |         | 474               |            |
| GO:0022613 | 225    | 1.39806468068982e-06 | 15.194495412844  | 0.57608470002076  |         | ribonucleoprotein complex biogenesis                                |         | 7                 |            |
| GO:0042254 | 6      | 1.9398878296968e-06  | 19.3155876381683 |                   |         | ribosome biogenesis                                                 |         | 0.38149609023597  |            |

Stable4\_20PerPair

|            |                                                                     |                         |                     |
|------------|---------------------------------------------------------------------|-------------------------|---------------------|
| GO:0071843 | 2.09082168711077e-06                                                | 14.2635057471264        | 0.611929970244274   |
| 7 239      | cellular component biogenesis at cellular level                     |                         |                     |
| GO:0042273 | 3.34571139845119e-06                                                | 141.225490196078        | 0.0307245173344405  |
| 3 12       | ribosomal large subunit biogenesis                                  |                         |                     |
| GO:0006364 | 6.3609947487871e-06                                                 | 22.5931186868687        | 0.266279150231818   |
| 5 104      | rRNA processing                                                     |                         |                     |
| GO:0016072 | 8.37237154329821e-06                                                | 21.2931547619048        | 0.281641408899038   |
| 5 110      | rRNA metabolic process                                              |                         |                     |
| GO:0042274 | 1.22788070669489e-05                                                | 84.7 0.0460867760016608 | 3 18                |
|            | ribosomal small subunit biogenesis                                  |                         |                     |
|            | Tissue: Muscle_skeletal=>Lung Type: asymmetric                      |                         |                     |
|            | SourceGene: SDS(ENSG00000135094.4)                                  |                         |                     |
|            | TargetGeneSet: VPS45 RPS7 RPL15 CTB EEF1A1P6 CTA TRBV7-8 MYPN       |                         |                     |
|            | RPS3AP5 FBXL15 RPL27A RP11 C11orf31 CTD NME3 RPL13 RPL26            |                         |                     |
|            | MRPL34 RPL13A NOSIP                                                 |                         |                     |
|            | GOBPID Pvalue OddsRatio ExpCount Count Size Term                    |                         |                     |
| GO:0006415 | 4.01611449165716e-10                                                | 101.294117647059        | 0.100754273060688   |
| 6 91       | translational termination                                           |                         |                     |
| GO:0006414 | 9.61586459350121e-10                                                | 86.8848484848485        | 0.11625493045464    |
| 6 105      | translational elongation                                            |                         |                     |
| GO:0006614 | 9.61586459350121e-10                                                | 86.8848484848485        | 0.11625493045464    |
| 6 105      | SRP-dependent cotranslational protein targeting to membrane         |                         |                     |
| GO:0006613 | 1.01867392935224e-09                                                | 86.01 0.117362120268494 | 6 106               |
|            | cotranslational protein targeting to membrane                       |                         |                     |
| GO:0045047 | 1.01867392935224e-09                                                | 86.01 0.117362120268494 | 6 106               |
|            | protein targeting to ER                                             |                         |                     |
| GO:0072599 | 1.01867392935224e-09                                                | 86.01 0.117362120268494 | 6 106               |
|            | establishment of protein localization to endoplasmic reticulum      |                         |                     |
| GO:0070972 | 1.95364559544598e-09                                                | 76.7303571428571        | 0.130648398034738   |
| 6 118      | protein localization to endoplasmic reticulum                       |                         |                     |
| GO:0000184 | 2.05615156802194e-09                                                | 76.046017699115         | 0.131755587848592 6 |
| 119        | nuclear-transcribed mRNA catabolic process, nonsense-mediated decay |                         |                     |
| GO:0019080 | 8.65497447098544e-09                                                | 59.1310344827586        | 0.167185661891911   |
| 6 151      | viral genome expression                                             |                         |                     |
| GO:0019083 | 8.65497447098544e-09                                                | 59.1310344827586        | 0.167185661891911   |
| 6 151      | viral transcription                                                 |                         |                     |
| GO:0006413 | 9.00527408901662e-09                                                | 58.7219178082192        | 0.168292851705764   |
| 6 152      | translational initiation                                            |                         |                     |
| GO:0006612 | 9.36723534542493e-09                                                | 58.3183673469388        | 0.169400041519618   |
| 6 153      | protein targeting to membrane                                       |                         |                     |
| GO:0043624 | 9.36723534542493e-09                                                | 58.3183673469388        | 0.169400041519618   |
| 6 153      | cellular protein complex disassembly                                |                         |                     |
| GO:0043241 | 1.13628486543256e-08                                                | 56.3802631578947        | 0.174935990588887   |
| 6 158      | protein complex disassembly                                         |                         |                     |
| GO:0000956 | 1.70119170987948e-08                                                | 52.5349693251534        | 0.187115078541277   |
| 6 169      | nuclear-transcribed mRNA catabolic process                          |                         |                     |
| GO:0034623 | 2.0256353412196e-08                                                 | 50.9535714285714        | 0.192651027610546   |
| 6 174      | cellular macromolecular complex disassembly                         |                         |                     |
| GO:0006402 | 2.32062780153623e-08                                                | 49.7546511627907        | 0.197079786865961   |
| 6 178      | mRNA catabolic process                                              |                         |                     |
| GO:0032984 | 2.39967536614885e-08                                                | 49.4635838150289        | 0.198186976679815   |
| 6 179      | macromolecular complex disassembly                                  |                         |                     |
| GO:0072594 | 5.23432551511703e-08                                                | 43.1424242424242        | 0.225866722026157   |
| 6 204      | establishment of protein localization to organelle                  |                         |                     |
| GO:0006401 | 5.38891409876322e-08                                                | 42.9226130653266        | 0.226973911840011   |
| 6 205      | RNA catabolic process                                               |                         |                     |
| GO:0019058 | 1.09526014563922e-07                                                | 37.8933333333333        | 0.255760847000208   |
| 6 231      | viral infectious cycle                                              |                         |                     |
| GO:0022415 | 2.20453366736355e-07                                                | 33.4984251968504        | 0.287869351601965   |
| 6 260      | viral reproductive process                                          |                         |                     |
| GO:0071845 | 3.70908453898079e-07                                                | 30.5546762589928        | 0.314441907134454   |
| 6 284      | cellular component disassembly at cellular level                    |                         |                     |
| GO:0022411 | 4.02707066625748e-07                                                | 30.1127659574468        | 0.318870666389869   |



Stable4\_20PerPair

|                |                 |                                                                                      |                                                 |                  |          |          |          |            |           |                   |
|----------------|-----------------|--------------------------------------------------------------------------------------|-------------------------------------------------|------------------|----------|----------|----------|------------|-----------|-------------------|
| 6              | 288             | cellular component disassembly                                                       |                                                 |                  |          |          |          |            |           |                   |
| GO:0016032     |                 | 5.48524295696051e-06                                                                 | 18.8629213483146                                |                  |          |          |          |            |           | 0.499342606048024 |
| 6              | 451             | viral reproduction                                                                   |                                                 |                  |          |          |          |            |           |                   |
| GO:0033365     |                 | 7.21412751227361e-06                                                                 | 17.9460385438972                                |                  |          |          |          |            |           | 0.523700781952806 |
| 6              | 473             | protein localization to organelle                                                    |                                                 |                  |          |          |          |            |           |                   |
| GO:0006605     |                 | 7.30218217842615e-06                                                                 | 17.9064102564103                                |                  |          |          |          |            |           | 0.52480797176666  |
| 6              | 474             | protein targeting                                                                    |                                                 |                  |          |          |          |            |           |                   |
| Tissue: Lung=> | Muscle_skeletal | Type:                                                                                | cluster                                         |                  |          |          |          |            |           |                   |
| SourceGene:    |                 | TTC12(ENSG00000149292.11)                                                            |                                                 |                  |          |          |          |            |           |                   |
| TargetGeneSet: | RHD             | MACF1                                                                                | GPBP1L1                                         | DIEXF            | ATAD2B   | LGALSL   | SLC1A4   | MAP4K4     |           |                   |
| SS18L2         | FAM198A         | ARF4                                                                                 | RP11                                            | TBL1XR1          | TNIP2    | RELL1    | NFKB1    | PPP1R14BP3 |           |                   |
| CLPTM1L        | NLN             | PIK3R1                                                                               | ANKRD32                                         | HBEGF            | E2F3     | FKBP5    | APOBEC2  | CENPQ      | FKBP1C    |                   |
| HDAC2          | RP3             | HIVEP2                                                                               | PDGFA                                           | HXA5             | IGFBP3   | YWHAG    | RBM48    | AZIN1      | OPLAH     |                   |
| TTL11          | PRRC2B          | WDR5                                                                                 | UBAC1                                           | ARHGAP21         |          | ABI1     | ARID5B   | TSPAN15    | FUT11     |                   |
| PANK1          | C10orf2         | PCGF6                                                                                | TEAD1                                           | TRC12            | FAIM2    | PCBP2    | KCTD10   | SACS       | SHISA2    |                   |
| FOXO1          | GRTP1           | PARP2                                                                                | STRN3                                           | TJP1             | HIC1     | PER1     | PMP22    | AKAP10     | UBE2O     |                   |
| NPTX1          | TSHZ3           | B4GALT5                                                                              | PPM1F                                           | TMEM184B         |          | CSNK1E   | PDGFB    | RBBP7      |           |                   |
| GOBPID         | Pvalue          | OddsRatio                                                                            | ExpCount                                        | Count            | Size     | Term     |          |            |           |                   |
| Tissue: Lung=> | Muscle_skeletal | Type:                                                                                | cluster                                         |                  |          |          |          |            |           |                   |
| SourceGene:    |                 | ZNF673(ENSG00000147121.10)                                                           |                                                 |                  |          |          |          |            |           |                   |
| TargetGeneSet: | ACAP3           | ALPL                                                                                 | ZBTB40                                          | HMG2             | SNRNP40  | UROD     | RP11     | HAX1       |           |                   |
| Clorf112       | GS1             | LINC00467                                                                            |                                                 | INTS7            | CCDC85A  | TIA1     | MKI67IP  | WDR75      |           |                   |
| MRPS36P1       | SLC22A14        |                                                                                      | TMEM42                                          | MON1A            | RUVBL1   | PLS1     | ACAP2    | TM4SF19    |           |                   |
| TMA16          | CTD             | GEMIN5                                                                               | NUDCD2                                          | B4GALT7          | C6orf62  | BYSL     | MMS22L   | MICAL1     | FAM126A   |                   |
| GNAI1          | SLC4A2          | PABPC1                                                                               | ZNF706                                          | NOL3             | C8orf55  | KIAA0020 | NOL6     | SWI5       |           |                   |
| USP20          | EXOSC2          | RBM17                                                                                | AFAP1L2                                         | KCNC1            | NAT10    | POLR2G   | ESRRA    | MAP4K2     | MUS81     |                   |
| TCIRG1         | NEU3            | CLNS1A                                                                               | SIDT2                                           | PVRL1            | CLEC2D   | LOH12CR1 | DTX3     | MDM1       |           |                   |
| RIC8B          | ISCU            | MAP1LC3B2                                                                            |                                                 | TRMT5            | DCAF4    | SMEK1    | HMG2P5   | CHRNA7     | HEXA      | NMB               |
| AEN            | SBK1            | RABEP2                                                                               | RRAD                                            | SLC43A2          | DPH1     | CTDNEP1  | GPS2     | TP53I13    | TUBG1     |                   |
| UBE2O          | AFMID           | HNRNPA1P7                                                                            |                                                 | CCDC68           | ANKRD24  | DCAF15   | SAMD1    | SNRPA      | KCNJ14    | CD37              |
| ZNF628         | ZNF324B         | C20orf72                                                                             |                                                 | NAA20            | HM13-AS1 |          | RBL1     | C20orf132  |           |                   |
| FAM210B        | SYCP2           | ZGPAT                                                                                | SETD4                                           | DGCR8            | HMOX1    | NCF4     | ZC4H2    | PIN4       | UTP14A    |                   |
| GOBPID         | Pvalue          | OddsRatio                                                                            | ExpCount                                        | Count            | Size     | Term     |          |            |           |                   |
| GO:0008380     |                 | 7.88259161784815e-06                                                                 | 6.7049735348815                                 | 1.72105736627223 |          |          |          |            |           | 10                |
| 323            |                 | RNA splicing                                                                         |                                                 |                  |          |          |          |            |           |                   |
| GO:0000377     |                 | 1.25598439456655e-05                                                                 | 8.3868677905945                                 | 1.08698359975088 |          |          |          |            |           | 8                 |
| 204            |                 | RNA splicing, via transesterification reactions with bulged adenosine as nucleophile |                                                 |                  |          |          |          |            |           |                   |
| GO:0000398     |                 | 1.25598439456655e-05                                                                 | 8.3868677905945                                 | 1.08698359975088 |          |          |          |            |           | 8                 |
| 204            |                 | nuclear mRNA splicing, via spliceosome                                               |                                                 |                  |          |          |          |            |           |                   |
| GO:0000375     |                 | 1.4973605780224e-05                                                                  | 8.17535510851539                                |                  |          |          |          |            |           | 1.11362535464674  |
| 8              |                 | 209                                                                                  | RNA splicing, via transesterification reactions |                  |          |          |          |            |           |                   |
| GO:0034660     |                 | 1.9847296795506e-05                                                                  | 6.76054987212276                                |                  |          |          |          |            |           | 1.51858002906373  |
| 9              |                 | 285                                                                                  | ncRNA metabolic process                         |                  |          |          |          |            |           |                   |
| Tissue: Lung=> | Nerve_tibial    | Type:                                                                                | cluster                                         |                  |          |          |          |            |           |                   |
| SourceGene:    |                 | ACSL3(ENSG00000123983.9)                                                             |                                                 |                  |          |          |          |            |           |                   |
| TargetGeneSet: | CEP104          | UBR4                                                                                 | HMGCL                                           | GBP7             | HIPK1    | CRTC2    | ATP1A4   | TARBP1     |           |                   |
| ITSN2          | SMPD4           | PKP4                                                                                 | RAX                                             | RP11             | THAP4    | SETD5    | CHCHD4   | C3orf75    | DHX30     | NEK4              |
| CGGBP1         | RPL7AP11        |                                                                                      | UBQLN4P1                                        |                  | NDUFB5   | WHSC2    | CCNI     | WWC2       | CTD       |                   |
| SPATA9         | CTB             | TCOF1                                                                                | ZNF300                                          | ATOX1            | UBLCP1   | RP3      | BRD2     | C6orf106   |           |                   |
| FOXP4          | FRS3            | HMG3                                                                                 | SMPDL3A                                         | TAB2             | FBXO5    | LSM5     | GSTK1    | KAT6A      | FAM82B    |                   |
| ZNF572         | EIF2C2          | FAM83H                                                                               | CCL19                                           | ATP8B5P          | PHF2     | ODF2     | PRRC2B   | UCK1       | EHMT1     | WAC               |
| PARD3          | PPRC1           | NOLC1                                                                                | MXI1                                            | ZRANB1           | CTBP2    | PPP2R2D  | PHRF1    | NUP98      | ZNF143    |                   |
| SPTY2D1        | INCENP          | NXF1                                                                                 | SNX15                                           | MRPL49           | SLC25A45 |          | FIBP     | SART1      | KLC2      |                   |
| KDM2A          | CLNS1A          | 7SK                                                                                  | PCSK7                                           | ZNF384           | ATN1     | CCDC91   | DDX23    | KCNH3      | PHC1P1    |                   |
| PRDM4          | GCN1L1          | EP400                                                                                | A2LD1                                           | RBM23            | GSTZ1    | IFI27L1  | DENND4A  | SIN3A      | AP3B2     |                   |
| AXIN1          | MAPK8IP3        |                                                                                      | RNPS1                                           | CREBBP           | NOMO1    | NOMO3    | SETD1A   | ZC3H18     | LINC00304 |                   |
| RP13           | FOXO3B          | SOCS7                                                                                | NT5C3L                                          | ANKRD40          | MAP3K3   | ABCA10   | SYNGR2   | FOXK2      | ZNF625    |                   |
| CHERP          | FAM187B         | SUPT5H                                                                               | MAP3K10                                         | ZNF574           | ZNF526   | CLPTM1   | CLASRP   | TRAPPC6A   |           |                   |
| SCAF1          | ZNF473          | ZNF71                                                                                | NCOA5                                           | ZBP1             | ADRM1    | SCAF4    | C21orf67 | EP300      | SBF1      |                   |
| GAPDHP1        | RPS2P55         | DDX3X                                                                                | RP6                                             | TIMP1            | FOXO4    | IDS      |          |            |           |                   |
| GOBPID         | Pvalue          | OddsRatio                                                                            | ExpCount                                        | Count            | Size     | Term     |          |            |           |                   |
| GO:0006397     |                 | 4.88462197370097e-07                                                                 | 5.56202168367347                                | 3.1199916960764  |          |          |          |            |           | 15                |

STable4\_20PerPair

399 mRNA processing  
Tissue: Lung=>Nerve\_Tibial Type: asymmetric  
SourceGene: ENSG00000211482.1  
TargetGeneSet: TMEM234 LAMTOR2 RP11 TMSB10 CAPG CHRNA1 UBE2E3 SPCS1 PDHB  
UQCRCQ ATOX1 PTTG1 GCNT2 DEFA6 FAM54A RP1 NDUFA4 CUL1 TAF5  
PHRF1 MIR611 KLC2 REP15 ATP5G2 RPL41 SLC16A7 GCN1L1 EP400 GOLGA3  
LPAR6 LRFN5 NPC2 KCNK13 KLHL25 CTD PKD1P6 MLLT6 FOXK2 RP13  
COX6B1 POLR2I MAP3K10 NDUFA3 SNRPB2 RP4 ROMO1 CTSZ MIR647 TTLL1 SBF1  
DDX3X CXorf26 NDUFA1  
GOBPID Pvalue OddsRatio ExpCount Count Size Term  
GO:0045333 2.53312645571106e-07 19.4730994152047 0.442183931907826  
7 142 cellular respiration  
GO:0015980 4.12017193659578e-06 10.2012112446895 0.955989204899315  
8 307 energy derivation by oxidation of organic compounds  
GO:0022904 1.15325666764779e-05 19.6634615384615 0.298941249740502  
5 96 respiratory electron transport chain  
Tissue: Nerve\_Tibial=>Lung Type: asymmetric  
SourceGene: ENSG00000223461.1  
TargetGeneSet: HS6ST1P1 STMN1 KIF2C ATRX IQGAP3 TNFSF13B RRM2  
SLC5A6 HMG2P21 NCAPH BUB1 CKAP2L C2orf27B FABP5P10  
ENO1P4 MYL3 CACNA1D CCDC66 RP11 SPSB4 SIAH2 MSANTD1 NCAPG EDNRA  
NEIL3 ZNF131 CDC25C RP1 KIFC1 APOBEC2 LAMA4 BTF3L4P3 SAMD9L  
DNAJB9 NCAPG2 PBK PHF19 KIF11 HOGA1 E2F8 FAT3 RAD51AP1  
CDCA3 WBP11 ESPL1 DLGAP5 RAD51 KIAA0101 ANP32BP1 HMG2P3  
CES1P1 HERPUD1 CENPN FANCA AURKB C17orf67 RPS10L GINS1 TPX2  
CPT1B  
GOBPID Pvalue OddsRatio ExpCount Count Size Term  
GO:0000280 5.22653288661906e-14 21.7272259392692 1.0656701958342 15  
350 nuclear division  
GO:0007067 5.22653288661906e-14 21.7272259392692 1.0656701958342 15  
350 mitosis  
GO:0000087 7.89044901168891e-14 21.0824587706147 1.09611791571518  
15 360 M phase of mitotic cell cycle  
GO:0048285 1.17693520690794e-13 20.4740165128703 1.12656563559615  
15 370 organelle fission  
GO:0051301 6.44458844443446e-09 11.9036931818182 1.37623693862016  
12 452 cell division  
GO:0007059 8.38176051439041e-09 24.0319865319865 0.426268078333679  
8 140 chromosome segregation  
GO:0000070 3.57368219700349e-07 41.8502331002331 0.149193827416788  
5 49 mitotic sister chromatid segregation  
GO:0000819 4.83790765365382e-07 39.1707583196945 0.158328143381081  
5 52 sister chromatid segregation  
GO:0051983 7.59729081247084e-07 71.935 0.073074527714345 4 24  
regulation of chromosome segregation  
GO:0007017 2.26535970998001e-06 9.39040178571429 1.1965953913224 9  
393 microtubule-based process  
GO:0007052 2.86790487866996e-06 49.5793103448276 0.100477475607224  
4 33 mitotic spindle organization  
GO:0007051 4.20160213903285e-06 24.4991452991453 0.243581759047817  
5 80 spindle organization  
GO:0000226 1.52310376407441e-05 10.2140499277904 0.819043664798284  
7 269 microtubule cytoskeleton organization  
Tissue: Nerve\_Tibial=>Lung Type: asymmetric  
SourceGene: FOLR4(ENSG00000183560.4)  
TargetGeneSet: DDX11L1 PAQR7 DMBX1 CMPK1 GNG5 S100A10 TCEB1P21 GNLY  
CCDC72 RP11 LINC00578 HNRPDL MRPS36 CTB PPIA ZNF92 FIS1  
TRBV5-6 GTF2E2 COX6C ATP6V1C1 CHMP5 PCDH15 TMEM9B ATP5L KLRB1  
HEBP1 GYS2 MYL6 COX6A1 ACIN1 PPP2R5C SRP14 MGA NDUFAB1 RPL27  
SUMO2 MYL12A MYL12B C18orf32 NDUFA13 PPIAP22 ATP5J SEC14L3 COX7B  
ZBTB33  
GOBPID Pvalue OddsRatio ExpCount Count Size Term  
GO:0022904 4.87906245786462e-09 36.3421529539688 0.252439277558646

Stable4\_20PerPair

|                |         |                                                                                                |                  |                   |        |                   |         |                   |          |
|----------------|---------|------------------------------------------------------------------------------------------------|------------------|-------------------|--------|-------------------|---------|-------------------|----------|
| 7              | 96      | respiratory electron transport chain                                                           |                  |                   |        |                   |         |                   |          |
| GO:0022900     |         | 5.00125557113411e-08                                                                           | 25.4005588011176 |                   |        |                   |         | 0.352363158258944 |          |
| 7              | 134     | electron transport chain                                                                       |                  |                   |        |                   |         |                   |          |
| GO:0015980     |         | 7.43733814647176e-08                                                                           | 14.6997222865078 |                   |        |                   |         | 0.807279773026088 |          |
| 9              | 307     | energy derivation by oxidation of organic compounds                                            |                  |                   |        |                   |         |                   |          |
| GO:0045333     |         | 7.46046853932828e-08                                                                           | 23.8819593787336 |                   |        |                   |         | 0.373399764722165 |          |
| 7              | 142     | cellular respiration                                                                           |                  |                   |        |                   |         |                   |          |
| GO:0006091     |         | 1.22530510802485e-06                                                                           | 10.3650728335116 |                   |        |                   |         | 1.1254584457823   | 9        |
| 428            |         | generation of precursor metabolites and energy                                                 |                  |                   |        |                   |         |                   |          |
| Tissue:        |         | Lung=>Nerve_Tibial                                                                             | Type:            | asymmetric        |        |                   |         |                   |          |
| SourceGene:    |         | GFAP(ENSG00000131095.5)                                                                        |                  |                   |        |                   |         |                   |          |
| TargetGeneSet: |         | UTP11L                                                                                         | ANKRD13C         | EVI5              | PFDN2  | MRPL33            | C1D     | SUGT1P2           |          |
| SEMA3B         | UBA3    | ATG3                                                                                           | RP11             | IL12A             | SUB1   | TAF9              | FAM174A | UQCRQ             | CTB TUBB |
| RANP1          | COX7A2  | PSMB1                                                                                          | RPA3             | NDUFA4            | MALSU1 | HUS1              | TRIM56  | FIS1              | PSMC2    |
| DCTN6          | COX6C   | TTC35                                                                                          | EXOSC4           | PRSS3             | DCTN3  | PSMB7             | ATP5C1  | FAM149B1          |          |
| SNORA19        | NDUFS8  | CWF19L2                                                                                        | MRP63            | POMP              | MZT1   | L2HGDH            | SNORA70 | PSMA3             | ERH      |
| GTF2A2         | COX5A   | DNAJA4                                                                                         | PSMA4            | MRPL28            | NFATC3 | SMYD4             | PSMB6   | TXNDC17           | DHRS7C   |
| PSMB3          | AATK    | IER3IP1                                                                                        | SEC11C           | UQCR11            | NFIC   | PIN1              | UBE2S   | TGM3              | SNRPB2   |
| ZMAT5          | CCDC160 |                                                                                                |                  |                   |        |                   |         |                   |          |
| GOBPID         | Pvalue  | OddsRatio                                                                                      | ExpCount         | Count             | Size   | Term              |         |                   |          |
| GO:0051443     |         | 2.37160466144218e-11                                                                           | 37.5686388807928 |                   |        | 0.317763476576016 |         |                   |          |
| 9              | 82      | positive regulation of ubiquitin-protein ligase activity                                       |                  |                   |        |                   |         |                   |          |
| GO:0051351     |         | 3.67800011272365e-11                                                                           | 35.6070737772865 |                   |        | 0.333264133969967 |         |                   |          |
| 9              | 86      | positive regulation of ligase activity                                                         |                  |                   |        |                   |         |                   |          |
| GO:0051438     |         | 1.00693999163763e-10                                                                           | 31.492296404989  | 0.372015777454847 |        |                   |         |                   | 9        |
| 96             |         | regulation of ubiquitin-protein ligase activity                                                |                  |                   |        |                   |         |                   |          |
| GO:0051340     |         | 1.46005668686652e-10                                                                           | 30.0996025251344 |                   |        | 0.387516434848799 |         |                   |          |
| 9              | 100     | regulation of ligase activity                                                                  |                  |                   |        |                   |         |                   |          |
| GO:0000216     |         | 6.3792202051005e-10                                                                            | 33.6244131455399 |                   |        | 0.306137983530551 |         |                   |          |
| 8              | 79      | M/G1 transition of mitotic cell cycle                                                          |                  |                   |        |                   |         |                   |          |
| GO:0031575     |         | 8.63789621157269e-10                                                                           | 32.2545045045045 |                   |        | 0.317763476576016 |         |                   |          |
| 8              | 82      | mitotic cell cycle G1/S transition checkpoint                                                  |                  |                   |        |                   |         |                   |          |
| GO:0031145     |         | 9.5309813187546e-10                                                                            | 31.8222222222222 |                   |        | 0.321638640924504 |         |                   |          |
| 8              | 83      | anaphase-promoting complex-dependent proteasomal ubiquitin-dependent protein catabolic process |                  |                   |        |                   |         |                   |          |
| GO:0031398     |         | 1.25636639401995e-09                                                                           | 23.1685899747566 |                   |        | 0.492145872257975 |         |                   |          |
| 9              | 127     | positive regulation of protein ubiquitination                                                  |                  |                   |        |                   |         |                   |          |
| GO:0071779     |         | 1.27078945669152e-09                                                                           | 30.5918803418803 |                   |        | 0.333264133969967 |         |                   |          |
| 8              | 86      | G1/S transition checkpoint                                                                     |                  |                   |        |                   |         |                   |          |
| GO:0006521     |         | 2.02662410128543e-09                                                                           | 40.9857142857143 |                   |        | 0.220884367863816 |         |                   |          |
| 7              | 57      | regulation of cellular amino acid metabolic process                                            |                  |                   |        |                   |         |                   |          |
| GO:2000045     |         | 3.94522660797564e-09                                                                           | 26.1978021978022 |                   |        | 0.383641270500311 |         |                   |          |
| 8              | 99      | regulation of G1/S transition of mitotic cell cycle                                            |                  |                   |        |                   |         |                   |          |
| GO:0006977     |         | 5.8120202579892e-09                                                                            | 34.7118644067797 |                   |        | 0.255760847000208 |         |                   |          |
| 7              | 66      | DNA damage response, signal transduction by p53 class mediator resulting in cell cycle arrest  |                  |                   |        |                   |         |                   |          |
| GO:0072413     |         | 5.8120202579892e-09                                                                            | 34.7118644067797 |                   |        | 0.255760847000208 |         |                   |          |
| 7              | 66      | signal transduction involved in mitotic cell cycle checkpoint                                  |                  |                   |        |                   |         |                   |          |
| GO:0072431     |         | 5.8120202579892e-09                                                                            | 34.7118644067797 |                   |        | 0.255760847000208 |         |                   |          |
| 7              | 66      | signal transduction involved in mitotic cell cycle G1/S transition DNA damage checkpoint       |                  |                   |        |                   |         |                   |          |
| GO:0072474     |         | 5.8120202579892e-09                                                                            | 34.7118644067797 |                   |        | 0.255760847000208 |         |                   |          |
| 7              | 66      | signal transduction involved in mitotic cell cycle G1/S checkpoint                             |                  |                   |        |                   |         |                   |          |
| GO:0051436     |         | 6.47080923363157e-09                                                                           | 34.1309523809524 |                   |        | 0.259636011348696 |         |                   |          |
| 7              | 67      | negative regulation of ubiquitin-protein ligase activity involved in mitotic cell cycle        |                  |                   |        |                   |         |                   |          |
| GO:0072401     |         | 6.47080923363157e-09                                                                           | 34.1309523809524 |                   |        | 0.259636011348696 |         |                   |          |
| 7              | 67      | signal transduction involved in DNA integrity checkpoint                                       |                  |                   |        |                   |         |                   |          |
| GO:0072404     |         | 6.47080923363157e-09                                                                           | 34.1309523809524 |                   |        | 0.259636011348696 |         |                   |          |
| 7              | 67      | signal transduction involved in G1/S transition checkpoint                                     |                  |                   |        |                   |         |                   |          |
| GO:0072422     |         | 6.47080923363157e-09                                                                           | 34.1309523809524 |                   |        | 0.259636011348696 |         |                   |          |
| 7              | 67      | signal transduction involved in DNA damage checkpoint                                          |                  |                   |        |                   |         |                   |          |
| GO:0072395     |         | 7.19193217728347e-09                                                                           | 33.5690866510539 |                   |        | 0.263511175697184 |         |                   |          |

Stable4\_20PerPair

|            |     |                                                                                                 |                  |                   |   |
|------------|-----|-------------------------------------------------------------------------------------------------|------------------|-------------------|---|
| 7          | 68  | signal transduction involved in cell cycle checkpoint                                           |                  |                   |   |
| GO:0000209 |     | 1.02305678494934e-08                                                                            | 17.9433090705487 | 0.623901460106567 |   |
| 9          | 161 | protein polyubiquitination                                                                      |                  |                   |   |
| GO:0033238 |     | 1.07991473500473e-08                                                                            | 31.4945054945055 | 0.279011833091136 |   |
| 7          | 72  | regulation of cellular amine metabolic process                                                  |                  |                   |   |
| GO:0051352 |     | 1.07991473500473e-08                                                                            | 31.4945054945055 | 0.279011833091136 |   |
| 7          | 72  | negative regulation of ligase activity                                                          |                  |                   |   |
| GO:0051437 |     | 1.07991473500473e-08                                                                            | 31.4945054945055 | 0.279011833091136 |   |
| 7          | 72  | positive regulation of ubiquitin-protein ligase activity involved in mitotic cell cycle         |                  |                   |   |
| GO:0051444 |     | 1.07991473500473e-08                                                                            | 31.4945054945055 | 0.279011833091136 |   |
| 7          | 72  | negative regulation of ubiquitin-protein ligase activity                                        |                  |                   |   |
| GO:0031571 |     | 1.19090254014592e-08                                                                            | 31.0151515151515 | 0.282886997439624 |   |
| 7          | 73  | mitotic cell cycle G1/S transition DNA damage checkpoint                                        |                  |                   |   |
| GO:0002479 |     | 1.44211901233994e-08                                                                            | 30.0987394957983 | 0.2906373261366   | 7 |
| 75         |     | antigen processing and presentation of exogenous peptide antigen via MHC class I, TAP-dependent |                  |                   |   |
| GO:0031396 |     | 1.48415781669281e-08                                                                            | 17.1449217181855 | 0.651027610545983 |   |
| 9          | 168 | regulation of protein ubiquitination                                                            |                  |                   |   |
| GO:0051439 |     | 1.9024701276404e-08                                                                             | 28.8209255533199 | 0.302262819182064 |   |
| 7          | 78  | regulation of ubiquitin-protein ligase activity involved in mitotic cell cycle                  |                  |                   |   |
| GO:0042590 |     | 2.08123048151715e-08                                                                            | 28.4186507936508 | 0.306137983530551 |   |
| 7          | 79  | antigen processing and presentation of exogenous peptide antigen via MHC class I                |                  |                   |   |
| GO:0071158 |     | 2.2740239072208e-08                                                                             | 28.027397260274  | 0.310013147879039 | 7 |
| 80         |     | positive regulation of cell cycle arrest                                                        |                  |                   |   |
| GO:0002478 |     | 2.94569981048109e-08                                                                            | 26.9154135338346 | 0.321638640924504 |   |
| 7          | 83  | antigen processing and presentation of exogenous peptide antigen                                |                  |                   |   |
| GO:0000077 |     | 3.41402806989042e-08                                                                            | 19.4986338797814 | 0.503771365303439 |   |
| 8          | 130 | DNA damage checkpoint                                                                           |                  |                   |   |
| GO:0019884 |     | 3.48110141843876e-08                                                                            | 26.2216117216117 | 0.329388969621479 |   |
| 7          | 85  | antigen processing and presentation of exogenous antigen                                        |                  |                   |   |
| GO:0000082 |     | 3.59390157517707e-08                                                                            | 15.3818968626037 | 0.720780568818767 |   |
| 9          | 186 | G1/S transition of mitotic cell cycle                                                           |                  |                   |   |
| GO:0000084 |     | 4.32819461581721e-08                                                                            | 18.8743386243386 | 0.519272022697391 |   |
| 8          | 134 | S phase of mitotic cell cycle                                                                   |                  |                   |   |
| GO:0031570 |     | 4.85946306035468e-08                                                                            | 18.5768229166667 | 0.527022351394367 |   |
| 8          | 136 | DNA integrity checkpoint                                                                        |                  |                   |   |
| GO:0007093 |     | 5.76145194306118e-08                                                                            | 18.147582697201  | 0.538647844439831 | 8 |
| 139        |     | mitotic cell cycle checkpoint                                                                   |                  |                   |   |
| GO:0031397 |     | 6.05117384076545e-08                                                                            | 24.0504201680672 | 0.356515120060895 |   |
| 7          | 92  | negative regulation of protein ubiquitination                                                   |                  |                   |   |
| GO:0045333 |     | 6.80409505498185e-08                                                                            | 17.7375621890547 | 0.550273337485295 |   |
| 8          | 142 | cellular respiration                                                                            |                  |                   |   |
| GO:0051320 |     | 7.18594164906072e-08                                                                            | 17.6049382716049 | 0.554148501833783 |   |
| 8          | 143 | S phase                                                                                         |                  |                   |   |
| GO:0022904 |     | 8.13551220948746e-08                                                                            | 22.9630818619583 | 0.372015777454847 |   |
| 7          | 96  | respiratory electron transport chain                                                            |                  |                   |   |
| GO:2000602 |     | 8.90378995282056e-08                                                                            | 17.0935251798561 | 0.569649159227735 |   |
| 8          | 147 | regulation of interphase of mitotic cell cycle                                                  |                  |                   |   |
| GO:0043161 |     | 9.80205424264059e-08                                                                            | 13.5909574468085 | 0.809909348833991 |   |
| 9          | 209 | proteasomal ubiquitin-dependent protein catabolic process                                       |                  |                   |   |
| GO:0002474 |     | 1.0070905787803e-07                                                                             | 22.2096273291925 | 0.383641270500311 |   |
| 7          | 99  | antigen processing and presentation of peptide antigen via MHC class I                          |                  |                   |   |
| GO:0010498 |     | 1.29897464201097e-07                                                                            | 13.1248843663275 | 0.837035499273407 |   |
| 9          | 216 | proteasomal protein catabolic process                                                           |                  |                   |   |
| GO:0048002 |     | 1.83640985175241e-07                                                                            | 20.2178217821782 | 0.418517749636703 |   |
| 7          | 108 | antigen processing and presentation of peptide antigen                                          |                  |                   |   |
| GO:0030330 |     | 3.18000147089335e-07                                                                            | 18.5519480519481 | 0.453394228773095 |   |
| 7          | 117 | DNA damage response, signal transduction by p53 class mediator                                  |                  |                   |   |
| GO:0000075 |     | 3.40784712969514e-07                                                                            | 11.6389370833714 | 0.937789772334095 |   |

STable4\_20PerPair

|                            |                           |                                                            |                  |                   |        |                    |        |          |        |
|----------------------------|---------------------------|------------------------------------------------------------|------------------|-------------------|--------|--------------------|--------|----------|--------|
| 9                          | 242                       | cell cycle checkpoint                                      |                  |                   |        |                    |        |          |        |
| GO:0072331                 |                           | 4.4735319198022e-07                                        | 17.5849753694581 |                   |        | 0.476645214864023  |        |          |        |
| 7                          | 123                       | signal transduction by p53 class mediator                  |                  |                   |        |                    |        |          |        |
| GO:0071156                 |                           | 7.076942782611e-07                                         | 10.6182728410513 |                   |        | 1.02304338800083   |        |          |        |
| 9                          | 264                       | regulation of cell cycle arrest                            |                  |                   |        |                    |        |          |        |
| GO:0022900                 |                           | 8.00066537061481e-07                                       | 16.0494938132733 |                   |        | 0.519272022697391  |        |          |        |
| 7                          | 134                       | electron transport chain                                   |                  |                   |        |                    |        |          |        |
| GO:0042770                 |                           | 1.07533269909024e-06                                       | 15.3190118152524 |                   |        | 0.542523008788319  |        |          |        |
| 7                          | 140                       | signal transduction in response to DNA damage              |                  |                   |        |                    |        |          |        |
| GO:0007050                 |                           | 1.30476957963186e-06                                       | 8.49945500787211 |                   |        | 1.42993564459207   |        |          |        |
| 10                         | 369                       | cell cycle arrest                                          |                  |                   |        |                    |        |          |        |
| GO:0051329                 |                           | 1.66080666485495e-06                                       | 8.26322611052198 |                   |        | 1.46868728807695   |        |          |        |
| 10                         | 379                       | interphase of mitotic cell cycle                           |                  |                   |        |                    |        |          |        |
| GO:0090068                 |                           | 1.78711354681157e-06                                       | 14.1378968253968 |                   |        | 0.585149816621687  |        |          |        |
| 7                          | 151                       | positive regulation of cell cycle process                  |                  |                   |        |                    |        |          |        |
| GO:0019882                 |                           | 1.86781761245699e-06                                       | 14.0394088669951 |                   |        | 0.589024980970175  |        |          |        |
| 7                          | 152                       | antigen processing and presentation                        |                  |                   |        |                    |        |          |        |
| GO:0051325                 |                           | 2.0040363970074e-06                                        | 8.08326605927805 |                   |        | 1.49968860286485   |        |          |        |
| 10                         | 387                       | interphase                                                 |                  |                   |        |                    |        |          |        |
| GO:0010565                 |                           | 2.03840210248302e-06                                       | 13.846452866861  | 0.596775309667151 |        |                    |        |          | 7      |
| 154                        |                           | regulation of cellular ketone metabolic process            |                  |                   |        |                    |        |          |        |
| GO:0007346                 |                           | 2.21855020581098e-06                                       | 9.18432479374729 |                   |        | 1.17417479759186   |        |          |        |
| 9                          | 303                       | regulation of mitotic cell cycle                           |                  |                   |        |                    |        |          |        |
| GO:0015980                 |                           | 2.47100756082141e-06                                       | 9.05847493931172 |                   |        | 1.18967545498581   |        |          |        |
| 9                          | 307                       | energy derivation by oxidation of organic compounds        |                  |                   |        |                    |        |          |        |
| GO:0010564                 |                           | 3.66142377567205e-06                                       | 7.52851915626345 |                   |        | 1.60431804027403   |        |          |        |
| 10                         | 414                       | regulation of cell cycle process                           |                  |                   |        |                    |        |          |        |
| GO:0045786                 |                           | 5.90980336392712e-06                                       | 7.11129212911109 |                   |        | 1.69344682028925   |        |          |        |
| 10                         | 437                       | negative regulation of cell cycle                          |                  |                   |        |                    |        |          |        |
| GO:0044106                 |                           | 6.39627865973228e-06                                       | 11.5413961038961 |                   |        | 0.709155075773303  |        |          |        |
| 7                          | 183                       | cellular amine metabolic process                           |                  |                   |        |                    |        |          |        |
| GO:0006511                 |                           | 9.84736623766474e-06                                       | 7.57326940365598 |                   |        | 1.41055982284963   |        |          |        |
| 9                          | 364                       | ubiquitin-dependent protein catabolic process              |                  |                   |        |                    |        |          |        |
| GO:0019941                 |                           | 1.14704978264928e-05                                       | 7.42312213471259 |                   |        | 1.43768597328905   |        |          |        |
| 9                          | 371                       | modification-dependent protein catabolic process           |                  |                   |        |                    |        |          |        |
| GO:0009308                 |                           | 1.22023885936851e-05                                       | 10.4029304029304 |                   |        | 0.782783198394575  |        |          |        |
| 7                          | 202                       | amine metabolic process                                    |                  |                   |        |                    |        |          |        |
| GO:0043632                 |                           | 1.22332329984429e-05                                       | 7.36053628679685 |                   |        | 1.44931146633451   |        |          |        |
| 9                          | 374                       | modification-dependent macromolecule catabolic process     |                  |                   |        |                    |        |          |        |
| GO:0051603                 |                           | 1.67323685365422e-05                                       | 7.06243001119821 |                   |        | 1.50743893156183   |        |          |        |
| 9                          | 389                       | proteolysis involved in cellular protein catabolic process |                  |                   |        |                    |        |          |        |
| Tissue: Nerve_Tibial=>Lung | Type:                     | asymmetric                                                 |                  |                   |        |                    |        |          |        |
| SourceGene:                | GPRC5A(ENSG00000013588.5) |                                                            |                  |                   |        |                    |        |          |        |
| TargetGeneSet:             | YARS                      | SARS                                                       | RP11             | HADH              | GARS   | C9orf9             | SRGN   | CFL1P1   | CARS   |
| KRTAP5-10                  | KRR1                      | ITGA11                                                     | MPRIP            | RAD23A            | CYP4F2 | SLC1A5             | SETD4  | TSR2     |        |
| GOBPID                     | Pvalue                    | OddsRatio                                                  | ExpCount         | Count             | Size   | Term               |        |          |        |
| GO:0006418                 |                           | 7.49326144892686e-08                                       | 145.393939393939 |                   |        | 0.0431804027402948 |        |          |        |
| 4                          | 48                        | tRNA aminoacylation for protein translation                |                  |                   |        |                    |        |          |        |
| GO:0034660                 |                           | 8.52978289875066e-08                                       | 43.4992319508449 |                   |        | 0.2563836412705    | 6      |          |        |
| 285                        |                           | ncRNA metabolic process                                    |                  |                   |        |                    |        |          |        |
| GO:0043038                 |                           | 9.60922540719905e-08                                       | 136.085106382979 |                   |        | 0.0458791779115632 |        |          |        |
| 4                          | 51                        | amino acid activation                                      |                  |                   |        |                    |        |          |        |
| GO:0043039                 |                           | 9.60922540719905e-08                                       | 136.085106382979 |                   |        | 0.0458791779115632 |        |          |        |
| 4                          | 51                        | tRNA aminoacylation                                        |                  |                   |        |                    |        |          |        |
| GO:0006399                 |                           | 3.59118375176098e-06                                       | 52.5876951331497 |                   |        | 0.112448965469518  |        |          |        |
| 4                          | 125                       | tRNA metabolic process                                     |                  |                   |        |                    |        |          |        |
| Tissue: Lung=>Nerve_Tibial | Type:                     | asymmetric                                                 |                  |                   |        |                    |        |          |        |
| SourceGene:                | GSTA1(ENSG00000243955.1)  |                                                            |                  |                   |        |                    |        |          |        |
| TargetGeneSet:             | UQCRH                     | CSRP3                                                      | KCNC4            | C1orf54           | LHX4   | LHX9               | RP11   | ERLEC1   |        |
| GPAT2                      | LYAR                      | CRMP1                                                      | CC2D2A           | ATP1B1P1          | NDUFS6 | TMEM14C            | RHAG   | TMEM120A |        |
| PTPN12                     | PUS7                      | LINC00032                                                  | ATP5C1           | NCOA4             | IFIT2  | MYOF               | BBIP1  | NDUFS3   |        |
| MRPL16                     | NDUFA9                    | KRR1                                                       | FRMD6            | CHURC1            | TDP1   | NDUFEB1            | WASH3P | HCFC1R1  | USP31  |
| ZNF629                     | COX4I1                    | SMARCE1                                                    | KRT223P          | PSMG2             | COX6B1 | RP3                | ROMO1  | DNTTIP1  | MRPL39 |

STable4\_20PerPair

| VDAC1P2                                     | TCEAL8    | NDUFA1               |                  |                   |        |                    |         |          |      |
|---------------------------------------------|-----------|----------------------|------------------|-------------------|--------|--------------------|---------|----------|------|
| GOBPID                                      | Pvalue    | OddsRatio            | ExpCount         | Count             | Size   | Term               |         |          |      |
| GO:0022904                                  | 96        | 3.96471358198034e-12 | 47.7997775305895 |                   |        | 0.265725555324891  |         |          |      |
| 9                                           | 134       | 8.28557327429333e-11 | 33.1803870967742 |                   |        | 0.370908587640994  |         |          |      |
| GO:0022900                                  | 142       | 1.39661050307714e-10 | 31.1671113267039 |                   |        | 0.393052383918068  |         |          |      |
| 9                                           | 58        | 1.94109208173366e-10 | 59.726678550208  | 0.160542523008788 | 7      |                    |         |          |      |
| GO:0006119                                  | 47        | 3.0024573107284e-09  | 61.8507890961263 |                   |        | 0.130094803127811  |         |          |      |
| GO:0042773                                  | 47        | 3.0024573107284e-09  | 61.8507890961263 |                   |        | 0.130094803127811  |         |          |      |
| GO:0042775                                  | 36        | 4.43961605146332e-08 | 66.2672811059908 |                   |        | 0.0996470832468341 |         |          |      |
| GO:0006120                                  | 307       | 1.20183139616916e-07 | 13.7494046330375 |                   |        | 0.849768182132724  |         |          |      |
| GO:0015980                                  | 428       | 1.95011088415191e-06 | 9.69497266918161 |                   |        | 1.18469310082347   |         |          |      |
| GO:0006091                                  |           |                      |                  |                   |        |                    |         |          |      |
| Tissue: Nerve_Tibial=>Lung Type: asymmetric |           |                      |                  |                   |        |                    |         |          |      |
| SourceGene: IGKV1OR2-118(ENSG00000219041.3) |           |                      |                  |                   |        |                    |         |          |      |
| TargetGeneSet:                              | DRAM2     | KRT8P29              | CNIH4            | MAT2A             | IL1R2  | STEAP3             | TNNC1   | WDR52    | CNBP |
| RP11                                        | LINC00578 | TMEM128              | PCDHA5           | GS1               | SGCE   | PENK               | C8orf34 | RPL8     |      |
| OR1L8                                       | RPL35     | MRPL41               | ZNF37BP          | VDAC2             | RPL27A | FDX1               | ATP5L   | C12orf57 |      |
| RIC8B                                       | HMGB3P4   | TCEB2                | RPL19            | MYO5B             | RPL36  | EIF3K              | ZNF814  | DPH3P1   |      |
| GOBPID                                      | Pvalue    | OddsRatio            | ExpCount         | Count             | Size   | Term               |         |          |      |
| GO:0019080                                  | 151       | 3.67143006109308e-07 | 26.8551724137931 |                   |        | 0.292574908310844  |         |          |      |
| 6                                           | 151       | 3.67143006109308e-07 | 26.8551724137931 |                   |        | 0.292574908310844  |         |          |      |
| GO:0019083                                  | 152       | 3.81729724848633e-07 | 26.6693648816936 |                   |        | 0.294512490485088  |         |          |      |
| GO:0006413                                  | 91        | 7.76820389467076e-07 | 36.2411526794742 |                   |        | 0.176319977856204  |         |          |      |
| GO:0006415                                  | 105       | 1.58320955019598e-06 | 31.1369565217391 |                   |        | 0.20344612829562   |         |          |      |
| GO:0006414                                  | 105       | 1.58320955019598e-06 | 31.1369565217391 |                   |        | 0.20344612829562   |         |          |      |
| GO:0006614                                  | 106       | 1.6593771554176e-06  | 30.8265174343521 |                   |        | 0.205383710469864  |         |          |      |
| GO:0006613                                  | 106       | 1.6593771554176e-06  | 30.8265174343521 |                   |        | 0.205383710469864  |         |          |      |
| GO:0045047                                  | 106       | 1.6593771554176e-06  | 30.8265174343521 |                   |        | 0.205383710469864  |         |          |      |
| GO:0072599                                  | 106       | 1.6593771554176e-06  | 30.8265174343521 |                   |        | 0.205383710469864  |         |          |      |
| GO:0070972                                  | 118       | 2.81950870580034e-06 | 27.5298191612159 |                   |        | 0.228634696560792  |         |          |      |
| GO:0000184                                  | 119       | 2.93925737315813e-06 | 27.2864225781846 |                   |        | 0.230572278735036  |         |          |      |
| GO:0019058                                  | 231       | 4.38768208778296e-06 | 17.209696969697  | 0.447581482250363 | 6      |                    |         |          |      |
| GO:0022415                                  | 260       | 8.65002609782669e-06 | 15.213672154617  | 0.503771365303439 | 6      |                    |         |          |      |
| GO:0006612                                  | 153       | 1.00600473682889e-05 | 20.9679788484136 |                   |        | 0.296450072659332  |         |          |      |
| GO:0043624                                  | 153       | 1.00600473682889e-05 | 20.9679788484136 |                   |        | 0.296450072659332  |         |          |      |
| GO:0043241                                  | 158       | 1.17612249258428e-05 | 20.2756464904802 |                   |        | 0.306137983530551  |         |          |      |
| GO:0000956                                  | 169       | 1.62952306616806e-05 | 18.9011134676564 |                   |        | 0.327451387447236  |         |          |      |
| GO:0034623                                  | 174       | 1.87599746165927e-05 | 18.3354772317983 |                   |        | 0.337139298318455  |         |          |      |

Stable4\_20PerPair

| Tissue:        | Lung=>Nerve_Tibial          | Type:                | asymmetric       |                   |           |                                                                     |         |         |                   |
|----------------|-----------------------------|----------------------|------------------|-------------------|-----------|---------------------------------------------------------------------|---------|---------|-------------------|
| SourceGene:    | IGLV4-69(ENSG00000211637.2) |                      |                  |                   |           |                                                                     |         |         |                   |
| TargetGeneSet: | PRDM16                      | CLCN6                | RPL11            | BMP8B             | DOCK7     | RP11                                                                | SORT1   | SLC27A3 |                   |
| Clorf9         | RPS6KC1                     | FIGLA                | PDCL3            | FHL2              | SCN7A     | CRTAP                                                               | ABHD14B | GFM1    | KIAA0232          |
| C1QTNF7        | SPP1                        | FNIP2                | CTD              | RPL37             | EEF1A1P19 |                                                                     | HMGCR   | PAQR8   | EEF1A1            |
| NDUF4F4        | PERP                        | PLAGL1               | RP4              | INSIG1            | PHYHIP    | MRPS35                                                              | RPL30   | PABPC1  | EIF3H             |
| SCRIB          | GPSM1                       | MAMDC4               | IDI1             | SEC61A2           | TOLLIP    | UBXN1                                                               | FAU     | BCRP1   | NCAM1             |
| RPL18AP3       |                             | AHSA1                | MAP1A            | POLG              | GAS7      | MAPK7                                                               | HDHD2   | ACAA2   | BCL2              |
| LMNB2          | PIAS4                       | EMR4P                | ELAVL1           | PRKCSH            | RPL18A    | RPS16                                                               | TTYH1   | RPL28   | RPL24P2           |
| EIF3L          | SAMM50                      | XG                   | PNMA5            | RPL10             |           |                                                                     |         |         |                   |
| GOBPID         | Pvalue                      | OddsRatio            | ExpCount         | Count             | Size      | Term                                                                |         |         |                   |
| GO:0006414     | 10                          | 1.75572187950827e-11 | 29.5046439628483 |                   |           | translational elongation                                            |         |         | 0.443221922358314 |
| GO:0006413     | 11                          | 3.2225444616925e-11  | 22.2324822695035 |                   |           | translational initiation                                            |         |         | 0.641616497128226 |
| GO:0000184     | 9                           | 1.55267453698717e-09 | 22.4685314685315 |                   |           | nuclear-transcribed mRNA catabolic process, nonsense-mediated decay |         |         | 0.502318178672756 |
| GO:0006415     | 8                           | 4.0524739989832e-09  | 26.0186406001364 |                   |           | translational termination                                           |         |         | 0.384125666043872 |
| GO:0006614     | 8                           | 1.26995874179205e-08 | 22.2415872398366 |                   |           | SRP-dependent cotranslational protein targeting to membrane         |         |         | 0.443221922358314 |
| GO:0006613     | 8                           | 1.3691395478107e-08  | 22.0130920292645 |                   |           | cotranslational protein targeting to membrane                       |         |         | 0.447443083523632 |
| GO:0045047     | 8                           | 1.3691395478107e-08  | 22.0130920292645 |                   |           | protein targeting to ER                                             |         |         | 0.447443083523632 |
| GO:0072599     | 8                           | 1.3691395478107e-08  | 22.0130920292645 |                   |           | establishment of protein localization to endoplasmic reticulum      |         |         | 0.447443083523632 |
| GO:0006612     | 9                           | 1.43143685183038e-08 | 17.1225961538462 |                   |           | protein targeting to membrane                                       |         |         | 0.645837658293544 |
| GO:0070972     | 8                           | 3.19308852501457e-08 | 19.5951972555746 |                   |           | protein localization to endoplasmic reticulum                       |         |         | 0.498097017507439 |
| GO:0000956     | 9                           | 3.40335834635391e-08 | 15.3930288461538 |                   |           | nuclear-transcribed mRNA catabolic process                          |         |         | 0.71337623693862  |
| GO:0006402     | 9                           | 5.3308649991659e-08  | 14.5640646335913 |                   |           | mRNA catabolic process                                              |         |         | 0.751366687426476 |
| GO:0072594     | 9                           | 1.71549864677873e-07 | 12.5991124260355 |                   |           | establishment of protein localization to organelle                  |         |         | 0.861116877724725 |
| GO:0006401     | 9                           | 1.78842527534319e-07 | 12.5339481946625 |                   |           | RNA catabolic process                                               |         |         | 0.865338038890042 |
| GO:0019080     | 8                           | 2.17490132258189e-07 | 15.0383955666975 |                   |           | viral genome expression                                             |         |         | 0.637395335962909 |
| GO:0019083     | 8                           | 2.17490132258189e-07 | 15.0383955666975 |                   |           | viral transcription                                                 |         |         | 0.637395335962909 |
| GO:0043624     | 8                           | 2.40656914726628e-07 | 14.8288874430709 |                   |           | cellular protein complex disassembly                                |         |         | 0.645837658293544 |
| GO:0043241     | 8                           | 3.08040556832121e-07 | 14.3295597484277 |                   |           | protein complex disassembly                                         |         |         | 0.66694346412013  |
| GO:0019058     | 231                         | 4.91070992933821e-07 | 11.045738045738  | 0.975088229188292 |           | viral infectious cycle                                              |         |         | 9                 |
| GO:0034623     | 174                         | 6.43090629727571e-07 | 12.933848601955  | 0.734482042765207 |           | cellular macromolecular complex disassembly                         |         |         | 8                 |
| GO:0032984     | 8                           | 7.9724984921292e-07  | 12.5512523446982 |                   |           | macromolecular complex disassembly                                  |         |         | 0.755587848591793 |
| GO:0022415     | 9                           | 1.31819270190311e-06 | 9.74954030033711 |                   |           | viral reproductive process                                          |         |         | 1.09750190298249  |
| Tissue:        | Lung=>Nerve_Tibial          | Type:                | asymmetric       |                   |           |                                                                     |         |         |                   |
| SourceGene:    | MICF(ENSG00000233265.1)     |                      |                  |                   |           |                                                                     |         |         |                   |
| TargetGeneSet: | HSPB11                      | RP4                  | NAP1L4P1         | Clorf54           | ZNF672    | PTRHD1                                                              | RP11    |         |                   |
| HACE1          | COX6C                       | CTBP2                | NDUFS3           | MRPL16            | ATP5L     | TBCEL                                                               | RPSAP51 | HIGD1C  | STAT6             |
| ST6GALNAC4P1   |                             | PLEKHG3              | IFI27L2          | NDUFB10           | COX4I1    | PVR                                                                 | MAVS    | ERGIC3  | DHRXS             |
| GOBPID         | Pvalue                      | OddsRatio            | ExpCount         | Count             | Size      | Term                                                                |         |         |                   |
| GO:0022904     | 5                           | 6.76611078259766e-08 | 65.6730769230769 |                   |           | respiratory electron transport chain                                |         |         | 0.112933361013079 |

Stable4\_20PerPair

|                            |                          |                                                         |                   |
|----------------------------|--------------------------|---------------------------------------------------------|-------------------|
| GO:0022900                 | 3.59926044765517e-07     | 46.2047803617571                                        | 0.157636149747422 |
| 5                          | 134                      | electron transport chain                                |                   |
| GO:0045333                 | 4.80373639711739e-07     | 43.4823600973236                                        | 0.167047263165179 |
| 5                          | 142                      | cellular respiration                                    |                   |
| Tissue: Nerve_Tibial=>Lung | Type: asymmetric         |                                                         |                   |
| SourceGene:                | PIGK(ENSG00000142892.10) |                                                         |                   |
| TargetGeneSet:             | UBE4B                    | SPEN                                                    | ARHGEF10L         |
| RAB4A                      | FEZ2                     | MDH1                                                    | NFU1              |
| NDUFS4                     | PTCD2                    | FAM174A                                                 | PHACTR1           |
| NDUFA5                     | METTTL2A                 | CTD                                                     | RAB2A             |
| ABCC2                      | FBXL15                   | PTPMT1                                                  | C11orf31          |
| COX6A1                     | ZNF605                   | ACIN1                                                   | TSSK6             |
| RAB11A                     | MRPL46                   | FAM173A                                                 | NME3              |
| C18orf32                   |                          | ATP5D                                                   | DAPK3             |
| SIGLEC10                   |                          | NOP56                                                   | SCAND1            |
| GOBPID                     | Pvalue                   | OddsRatio                                               | ExpCount          |
| GO:0022904                 | 1.37277815089332e-11     | 30.2325581395349                                        | 0.431804027402948 |
| 10                         | 96                       | respiratory electron transport chain                    |                   |
| GO:0045333                 | 3.1726615113612e-11      | 22.1663839411931                                        | 0.63871012386686  |
| 11                         | 142                      | cellular respiration                                    |                   |
| GO:0022900                 | 3.88793784774641e-10     | 20.9120234604106                                        | 0.602726454916615 |
| 10                         | 134                      | electron transport chain                                |                   |
| GO:0006119                 | 6.70860201440995e-09     | 33.9232589587559                                        | 0.260881599889281 |
| 7                          | 58                       | oxidative phosphorylation                               |                   |
| GO:0015980                 | 1.00411779914637e-08     | 10.8149664214902                                        | 1.38087329596568  |
| 12                         | 307                      | energy derivation by oxidation of organic compounds     |                   |
| GO:0006091                 | 4.55303983869757e-08     | 8.41626506024096                                        | 1.92512628883814  |
| 13                         | 428                      | generation of precursor metabolites and energy          |                   |
| GO:0009206                 | 7.10485190235733e-06     | 21.7136363636364                                        | 0.269877517126842 |
| 5                          | 60                       | purine ribonucleoside triphosphate biosynthetic process |                   |
| GO:0009145                 | 7.71248956275583e-06     | 21.3244047619048                                        | 0.274375475745623 |
| 5                          | 61                       | purine nucleoside triphosphate biosynthetic process     |                   |
| GO:0009201                 | 1.05610168824303e-05     | 19.8972222222222                                        | 0.292367310220746 |
| 5                          | 65                       | ribonucleoside triphosphate biosynthetic process        |                   |
| GO:0009205                 | 1.14367548275899e-05     | 5.8510101010101                                         | 2.22648951629645  |
| 495                        |                          | purine ribonucleoside triphosphate metabolic process    | 11                |
| GO:0009144                 | 1.23331147428029e-05     | 5.80138129933212                                        | 2.24448135077157  |
| 11                         | 499                      | purine nucleoside triphosphate metabolic process        |                   |
| GO:0009142                 | 1.41720677300219e-05     | 18.6484375                                              | 0.310359144695869 |
| 69                         |                          | nucleoside triphosphate biosynthetic process            | 5                 |
| GO:0006120                 | 1.97063151171034e-05     | 29.4139344262295                                        | 0.161926510276105 |
| 4                          | 36                       | mitochondrial electron transport, NADH to ubiquinone    |                   |
| Tissue: Nerve_Tibial=>Lung | Type: asymmetric         |                                                         |                   |
| SourceGene:                | RAD52(ENSG0000002016.11) |                                                         |                   |
| TargetGeneSet:             | MRPL20                   | DFFB                                                    | UBE4B             |
| MSH4                       | RP4                      | APH1A                                                   | INTS3             |
| ADCY3                      | SLC5A6                   | MORN2                                                   | NFU1              |
| TMEM194B                   |                          | SATB2                                                   | SPAG16            |
| SUCLG2                     | CCDC48                   | CNBP                                                    | COL6A5            |
| TMEM128                    | ANKRD17                  | TMSB4XP8                                                |                   |
| NDUFS4                     | FAM174A                  | CTB                                                     | RP1               |
| C6orf226                   |                          | CNR1                                                    | LINC00271         |
| CHCHD2                     | EIF4H                    | FZD1                                                    | SGCE              |
| ASH2L                      | C8orf40                  | PKIA                                                    | DECRL             |
| MED27                      | ATP5C1                   | C1DPL1                                                  | ZNF37BP           |
| ZNF195                     | TMEM9B                   | P1EKHA7                                                 | PIGCP1            |
| TMEM123                    | CARD16                   | ATM                                                     | C11orf1           |
| SLC41A2                    | RIC8B                    | UBE3B                                                   | COX6A1            |
| MAP3K9                     | POMT2                    | TRIP11                                                  | NDUFB1            |
| CLDN9                      | PKD1P1                   | NDUFAB1                                                 | TNRC6A            |
| ILGN2                      | CTC1                     | TEKT3                                                   | SLC46A1           |
| ICAM2                      | ATP5H                    | TBC1D16                                                 | MYL12A            |
| HOOK2                      | DCAF15                   | ZNF793                                                  | FAM98C            |
|                            |                          | ZNF428                                                  | NAPA              |
|                            |                          | SNRNP70                                                 | VSIG10L           |
|                            |                          | PPP1R12C                                                |                   |



Stable4\_20PerPair

| ZSCAN22                    | DSTN     | DTD1      | CHMP4B                                                 | RALY             | PKIG     | PABPC1L | RP3       | ZMYND8             | SLC17A9  |
|----------------------------|----------|-----------|--------------------------------------------------------|------------------|----------|---------|-----------|--------------------|----------|
| ATP5J                      | SNRPD3   | PRR14L    | ZFX                                                    | TSR2             | ACRC     | CXorf41 | AKAP14    | APLN               | EMD      |
| GOBPID                     | Pvalue   | OddsRatio | ExpCount                                               | Count            | Size     | Term    | Term      | Term               | Term     |
| GO:0022904                 | 13       | 96        | 2.38067494063953e-11                                   | 15.9031841652324 |          |         |           | 1.01640024911771   |          |
|                            |          |           | respiratory electron transport chain                   |                  |          |         |           |                    |          |
| GO:0045333                 | 14       | 142       | 3.05580499993376e-10                                   | 11.1499550359712 |          |         |           | 1.50342536848661   |          |
|                            |          |           | cellular respiration                                   |                  |          |         |           |                    |          |
| GO:0022900                 | 134      |           | 1.65293176557921e-09                                   | 10.8796340023613 |          |         |           | 1.4187253477268    | 13       |
|                            |          |           | electron transport chain                               |                  |          |         |           |                    |          |
| GO:0015980                 | 16       | 307       | 1.61968757953848e-07                                   | 5.62149145910151 |          |         |           | 3.25036329665767   |          |
|                            |          |           | energy derivation by oxidation of organic compounds    |                  |          |         |           |                    |          |
| GO:0006120                 | 6        | 36        | 1.91302751155676e-06                                   | 19.4122448979592 |          |         |           | 0.381150093419141  |          |
|                            |          |           | mitochondrial electron transport, NADH to ubiquinone   |                  |          |         |           |                    |          |
| GO:0006119                 | 7        | 58        | 2.48576023154465e-06                                   | 13.3936341659952 |          |         |           | 0.614075150508615  |          |
|                            |          |           | oxidative phosphorylation                              |                  |          |         |           |                    |          |
| GO:0042773                 | 6        | 47        | 9.58122597442801e-06                                   | 14.1931309109009 |          |         |           | 0.497612621963878  |          |
|                            |          |           | ATP synthesis coupled electron transport               |                  |          |         |           |                    |          |
| GO:0042775                 | 6        | 47        | 9.58122597442801e-06                                   | 14.1931309109009 |          |         |           | 0.497612621963878  |          |
|                            |          |           | mitochondrial ATP synthesis coupled electron transport |                  |          |         |           |                    |          |
| GO:0006091                 | 16       | 428       | 1.23508777015847e-05                                   | 3.93621997023599 |          |         |           | 4.53145111064978   |          |
|                            |          |           | generation of precursor metabolites and energy         |                  |          |         |           |                    |          |
| Tissue: Lung=>Nerve_Tibial |          |           | Type: asymmetric                                       |                  |          |         |           |                    |          |
| SourceGene:                |          |           | RP11-645C24.1(ENSG00000185864.12)                      |                  |          |         |           |                    |          |
| TargetGeneSet:             | ISG15    | NADK      | CEP104                                                 | RP11             | WDTC1    | IFI6    | EYA3      | ATPIF1             |          |
| KHDRBS1                    | PIGK     | IFI44     | LPPR5                                                  | NBPF8            | NBPF10   | NBPF24  | INTS3     | CRTC2              | DCST2    |
| PFN1P1                     | MDM4     | PUM2      | MORN2                                                  | GALNT5           | BTF3L4P2 |         | SPC25     | UBE2E3             | TRIP12   |
| UBE2E1                     | SPCS1    | FTH1P23   | RPL7AP11                                               |                  | SNORA4   | CCNI    | BMP2K     | TMSB4XP8           | ING5     |
| NDUFC1                     | C5orf55  | RBBP4P1   | SUB1                                                   | CTD              | FAM174A  | UQCRQ   | TCOF1     | C6orf226           | PEX6     |
| C6orf108                   |          | RP3       | NDUFA4                                                 | CCDC126          | CDK13    | GS1     | GTF2IRD2B | SGCE               |          |
| PILRB                      | PPP1R35  | DUS4L     | ARF5                                                   | RBM28            | C7orf49  | GSTK1   | ZNF862    | C8orf59            | COX6C    |
| KIAA2026                   |          | C9orf133  |                                                        | GKAP1            | SEC61B   | TSC1    | TUBBP5    | ATP5C1             | PBLD     |
| CALM2P2                    | FGFBP3   | CPSF7     | NXF1                                                   | SNX15            | RCE1     | RAD52   | GYS2      | MED13L             | GCN1L1   |
| MLXIP                      | MPHOSPH8 |           | IPO5                                                   | ACIN1            | DHRS2    | CTAGE5  | PSMA3     | ZNF410             | PROX2    |
| NDUFB1                     | IFI27L1  | IFI27     | PPP1R13B                                               |                  | HMGN2P5  | TUBGCP4 | NPRL3     | IFT140             | PDXDC1   |
| USP31                      | ITFG1    | C17orf85  |                                                        | TXNDC17          | NEURL4   | CTC1    | FLII      | EPN2               | NPEPPS   |
| ATP5H                      | LLGL2    | EPG5      | IER3IP1                                                | UQCR11           | PIP5K1C  | INSR    | ANKLE1    | ANKRD27            | PPP1R13L |
| SLC17A7                    | TBC1D17  | SNRPB2    | LPIN3                                                  | GDAP1L1          | BCAS4    | SS18L1  | LINC00478 | H1F0               | RP6      |
| TIMP1                      | MORC4    | PGRMC1    | NDUFA1                                                 | LINC00087        |          | VAMP7   |           |                    |          |
| GOBPID                     | Pvalue   | OddsRatio | ExpCount                                               | Count            | Size     | Term    | Term      | Term               | Term     |
| GO:0022904                 | 9        | 96        | 1.38635549180869e-08                                   | 16.9655172413793 |          |         |           | 0.637741332779738  |          |
|                            |          |           | respiratory electron transport chain                   |                  |          |         |           |                    |          |
| GO:0022900                 | 9        | 134       | 2.53676180473649e-07                                   | 11.7765517241379 |          |         |           | 0.890180610338385  |          |
|                            |          |           | electron transport chain                               |                  |          |         |           |                    |          |
| GO:0045333                 | 9        | 142       | 4.15805339285461e-07                                   | 11.0619652579725 |          |         |           | 0.943325721403363  |          |
|                            |          |           | cellular respiration                                   |                  |          |         |           |                    |          |
| GO:0015980                 | 12       | 307       | 8.65198381291436e-07                                   | 6.80871670702179 |          |         |           | 2.03944363711854   |          |
|                            |          |           | energy derivation by oxidation of organic compounds    |                  |          |         |           |                    |          |
| GO:0006091                 | 13       | 428       | 4.86402676188033e-06                                   | 5.26114094933953 |          |         |           | 2.84326344197633   |          |
|                            |          |           | generation of precursor metabolites and energy         |                  |          |         |           |                    |          |
| Tissue: Nerve_Tibial=>Lung |          |           | Type: asymmetric                                       |                  |          |         |           |                    |          |
| SourceGene:                |          |           | RP11-74D7.1(ENSG00000259505.1)                         |                  |          |         |           |                    |          |
| TargetGeneSet:             | RP11     | S100A8    | MNDA                                                   | CCDC85A          | FHL2     | IL1RN   | ZEB2-AS1  |                    |          |
| MYD88                      | LMOD3    | HTR1F     | SSR3                                                   | LIMCH1           | LST1     | C7orf31 | MYO1G     | PILRA              | LYN      |
| PIK3AP1                    | CATSPER1 |           | LRRC23                                                 | STAC3            | GLT1D1   | LCP1    | RNASE2    | TRAV20             | AQP9     |
| RPS17L                     | GDE1     | TOX3      | CTU2                                                   | CENPBD1          | BECN1    | MEOX1   | CD300E    | MIR1227            | C19orf38 |
| TYROBP                     | FPR2     | NLRP12    | VSTM1                                                  | OSCAR            | LILRA1   | HCK     | IFNGR2    | IGLV3-16           | CYBB     |
| FTH1P8                     |          |           |                                                        |                  |          |         |           |                    |          |
| GOBPID                     | Pvalue   | OddsRatio | ExpCount                                               | Count            | Size     | Term    | Term      | Term               | Term     |
| GO:0006954                 | 9        | 462       | 6.28500911262047e-07                                   | 11.5604304635762 |          |         |           | 1.05501349387586   |          |
|                            |          |           | inflammatory response                                  |                  |          |         |           |                    |          |
| GO:0031663                 | 4        | 36        | 1.2605373894478e-06                                    | 62.0086206896552 |          |         |           | 0.0822088436786382 |          |
|                            |          |           | lipopolysaccharide-mediated signaling pathway          |                  |          |         |           |                    |          |
| GO:0071216                 |          |           | 3.21972438124354e-06                                   | 26.3641384388807 |          |         |           | 0.232925057089475  |          |

Stable4\_20PerPair

|                                                                |          |                                                                                                 |                  |                   |          |          |          |          |                   |      |
|----------------------------------------------------------------|----------|-------------------------------------------------------------------------------------------------|------------------|-------------------|----------|----------|----------|----------|-------------------|------|
| 5                                                              | 102      | cellular response to biotic stimulus                                                            |                  |                   |          |          |          |          |                   |      |
| GO:0002757                                                     |          | 1.33033524414724e-05                                                                            | 13.7690441533236 |                   |          |          |          |          | 0.536641062902221 |      |
| 6                                                              | 235      | immune response-activating signal transduction                                                  |                  |                   |          |          |          |          |                   |      |
| GO:0002764                                                     |          | 1.80564638741489e-05                                                                            | 13.0174471992654 |                   |          |          |          |          | 0.566327589786174 |      |
| 6                                                              | 248      | immune response-regulating signaling pathway                                                    |                  |                   |          |          |          |          |                   |      |
| Tissue: Nerve_Tibial=>Lung                                     |          | Type: asymmetric                                                                                |                  |                   |          |          |          |          |                   |      |
| SourceGene:                                                    |          | RPL23AP80(ENSG00000213035.3)                                                                    |                  |                   |          |          |          |          |                   |      |
| TargetGeneSet:                                                 | AGTRAP   | EFHD2                                                                                           | SH3BGRL3         | GBP1              | GBP4     | FCRL6    | RAB7L1   |          |                   |      |
| OR14L1P                                                        | ARHGAP25 | SHISA5                                                                                          | ZBTB20-AS4       | MYLK-AS2          |          | LRRC33   | CD38     |          |                   |      |
| CXCL9                                                          | CXCL10   | HERC3                                                                                           | LRBA             | ST8SIA4           | STC2     | GMNN     | UBD      | HLA-F    | HCG4P11           | HCP5 |
| PSMB8                                                          | PSMB9    | TAP1                                                                                            | RSPO3            | HIVEP2            | TRGC2    | RP11     | DENND4C  | SH2D3C   | C9orf167          |      |
| MAP4K2                                                         | PLXNC1   | DGKZP1                                                                                          | LCP1             | PSME1             | GZMH     | GZMB     | RTN1     | CCDC88C  | WARS              | RYS3 |
| B2M                                                            | POLR2M   | CILP                                                                                            | IL32             | CORO1A            | NLRC5    | CDH5     | PSMB10   | PFN1     | TRPV2             | CCL5 |
| ICAM2                                                          | BBC3     | MED25                                                                                           | KIR2DL3          | ITGB2             | TYMP     | NUDT10   |          |          |                   |      |
| GOBPID                                                         | Pvalue   | OddsRatio                                                                                       | ExpCount         | Count             | Size     | Term     |          |          |                   |      |
| GO:0002479                                                     |          | 9.70439617785782e-09                                                                            | 32.0684143222506 |                   |          |          |          |          | 0.275067469379282 |      |
| 7                                                              | 75       | antigen processing and presentation of exogenous peptide antigen via MHC class I, TAP-dependent |                  |                   |          |          |          |          |                   |      |
| GO:0042590                                                     |          | 1.40153348417612e-08                                                                            | 30.2783816425121 |                   |          |          |          |          | 0.289737734412843 |      |
| 7                                                              | 79       | antigen processing and presentation of exogenous peptide antigen via MHC class I                |                  |                   |          |          |          |          |                   |      |
| GO:0002478                                                     |          | 1.985123929517e-08                                                                              | 28.6767734553776 |                   |          |          |          |          | 0.304407999446405 |      |
| 7                                                              | 83       | antigen processing and presentation of exogenous peptide antigen                                |                  |                   |          |          |          |          |                   |      |
| GO:0019884                                                     |          | 2.34678722332923e-08                                                                            | 27.9375696767001 |                   |          |          |          |          | 0.311743131963186 |      |
| 7                                                              | 85       | antigen processing and presentation of exogenous antigen                                        |                  |                   |          |          |          |          |                   |      |
| GO:0002474                                                     |          | 6.80660493184403e-08                                                                            | 23.6630434782609 |                   |          |          |          |          | 0.363089059580652 |      |
| 7                                                              | 99       | antigen processing and presentation of peptide antigen via MHC class I                          |                  |                   |          |          |          |          |                   |      |
| GO:0048002                                                     |          | 1.24320184663247e-07                                                                            | 21.5408953938872 |                   |          |          |          |          | 0.396097155906166 |      |
| 7                                                              | 108      | antigen processing and presentation of peptide antigen                                          |                  |                   |          |          |          |          |                   |      |
| GO:0019882                                                     |          | 1.27460005119315e-06                                                                            | 14.9581709145427 |                   |          |          |          |          | 0.557470071275344 |      |
| 7                                                              | 152      | antigen processing and presentation                                                             |                  |                   |          |          |          |          |                   |      |
| GO:0034341                                                     |          | 3.068198791441e-06                                                                              | 17.3775075987842 |                   |          |          |          |          | 0.407099854681337 |      |
| 6                                                              | 111      | response to interferon-gamma                                                                    |                  |                   |          |          |          |          |                   |      |
| GO:0000216                                                     |          | 1.00390326144296e-05                                                                            | 20.1632882882883 |                   |          |          |          |          | 0.289737734412843 |      |
| 5                                                              | 79       | M/G1 transition of mitotic cell cycle                                                           |                  |                   |          |          |          |          |                   |      |
| Tissue: Nerve_Tibial=>Lung                                     |          | Type: asymmetric                                                                                |                  |                   |          |          |          |          |                   |      |
| SourceGene:                                                    |          | RPL7AP11(ENSG00000242445.1)                                                                     |                  |                   |          |          |          |          |                   |      |
| TargetGeneSet:                                                 | WASH7P   | TAS1R3                                                                                          | AKR7A2           | NBPF8             | FCRL5    | LPIN1    | IGKJ5    | IGKC     |                   |      |
| IGKJ4                                                          | IGKJ2    | IGKJ1                                                                                           | IGKV4-1          | IGKV3-7           | IGKV3-15 | IGKV2-24 |          | IGKV2-28 |                   |      |
| IGKV2-30                                                       |          | IGKV1-33                                                                                        |                  | IGKV3D-11         | HAT1     | ACSL3    | CGGBP1   | LRRC34   | IGJ               |      |
| VTI1BP2                                                        | RP11     | PCDHAC1                                                                                         | MUM1             | FILIP1            | GABRR2   | NT5DC1   | CLDN15   | TPD52    | PVT1              | GLDC |
| LCN10                                                          | BMI1     | ZNF32-AS2                                                                                       |                  | IGHG2             | IGHGP    | IGHJ1    | KIAA0125 |          | HERC2P3           |      |
| MRPL28                                                         | RPS12P27 |                                                                                                 | CD79B            | JSRP1             | CD79A    | FER1L4   | CLDN14   | IGLV1-36 |                   |      |
| IGLV3-16                                                       |          | IGLV3-12                                                                                        |                  | IGLC2             | DERL3    | SAMM50   | PIM2     |          |                   |      |
| GOBPID                                                         | Pvalue   | OddsRatio                                                                                       | ExpCount         | Count             | Size     | Term     |          |          |                   |      |
| GO:0006958                                                     |          | 5.39127483595445e-08                                                                            | 63.8933333333333 |                   |          |          |          |          | 0.103799045048786 |      |
| 5                                                              | 50       | complement activation, classical pathway                                                        |                  |                   |          |          |          |          |                   |      |
| GO:0006959                                                     |          | 1.60955212150291e-07                                                                            | 30.8297413793103 |                   |          |          |          |          | 0.253269669919037 |      |
| 6                                                              | 122      | humoral immune response                                                                         |                  |                   |          |          |          |          |                   |      |
| GO:0006956                                                     |          | 1.7552478587324e-07                                                                             | 49.5275862068966 |                   |          |          |          |          | 0.13078679676147  |      |
| 5                                                              | 63       | complement activation                                                                           |                  |                   |          |          |          |          |                   |      |
| GO:0002455                                                     |          | 2.05671299082553e-07                                                                            | 47.87            | 0.134938758563421 |          |          | 5        | 65       |                   |      |
| humoral immune response mediated by circulating immunoglobulin |          |                                                                                                 |                  |                   |          |          |          |          |                   |      |
| GO:0072376                                                     |          | 6.62919932256574e-07                                                                            | 37.2571428571429 |                   |          |          |          |          | 0.170230433880008 |      |
| 5                                                              | 82       | protein activation cascade                                                                      |                  |                   |          |          |          |          |                   |      |
| GO:0002253                                                     |          | 2.0475684111775e-06                                                                             | 14.7264740917213 |                   |          |          |          |          | 0.620718289391738 |      |
| 7                                                              | 299      | activation of immune response                                                                   |                  |                   |          |          |          |          |                   |      |
| GO:0016064                                                     |          | 2.98603796326027e-06                                                                            | 27.0094339622642 |                   |          |          |          |          | 0.230433880008304 |      |
| 5                                                              | 111      | immunoglobulin mediated immune response                                                         |                  |                   |          |          |          |          |                   |      |
| GO:0019724                                                     |          | 3.40548408730857e-06                                                                            | 26.2605504587156 |                   |          |          |          |          | 0.236661822711231 |      |
| 5                                                              | 114      | B cell mediated immunity                                                                        |                  |                   |          |          |          |          |                   |      |
| GO:0050778                                                     |          | 7.49754686067186e-06                                                                            | 11.9897698209719 |                   |          |          |          |          | 0.755657047955159 |      |

Stable4\_20PerPair

| GO ID                                                               | Count                | Size              | Term                                                                                           |
|---------------------------------------------------------------------|----------------------|-------------------|------------------------------------------------------------------------------------------------|
| 7                                                                   | 364                  |                   | positive regulation of immune response                                                         |
| Tissue: Lung=>Nerve_Tibial Type: asymmetric                         |                      |                   |                                                                                                |
| SourceGene: SLC1A2(ENSG00000110436.6)                               |                      |                   |                                                                                                |
| TargetGeneSet: PODN PRKAA2 RP4 ANKRD13C MLLT11 MEX3A UBXN2A C1D     |                      |                   |                                                                                                |
| DGUOK                                                               | SSFA2                | HSPE1             | TIMP4                                                                                          |
| ENOPH1                                                              | MRPS18C              | SNCA              | RAP1GDS1                                                                                       |
| MOCS1                                                               | COX7A2               | RP1               | QKI                                                                                            |
| EXOSC4                                                              | PSMC3                | POLR2G            | SPCS2                                                                                          |
| UBE2N                                                               | C12orf76             |                   | COX6A1                                                                                         |
| PSME2                                                               | PSMA3                | RN5S392           | GATM                                                                                           |
| TRAPPC1                                                             | DHRS7C               | PSMB3             | STAT5A                                                                                         |
| UBE2S                                                               | ISOC2                | SNRPB2            | DYNLRB1                                                                                        |
| GOBPID                                                              | Pvalue               | OddsRatio         | ExpCount                                                                                       |
| GO:0051443                                                          | 7.56359909178388e-09 | 23.7904365904366  | 23.7904365904366                                                                               |
| 8                                                                   | 82                   |                   | positive regulation of ubiquitin-protein ligase activity                                       |
| GO:0051351                                                          | 1.10808786561741e-08 | 22.5641025641026  | 22.5641025641026                                                                               |
| 8                                                                   | 86                   |                   | positive regulation of ligase activity                                                         |
| GO:0051438                                                          | 2.66028170384164e-08 | 19.986013986014   | 19.986013986014                                                                                |
| 96                                                                  |                      | 0.484949138467926 | regulation of ubiquitin-protein ligase activity                                                |
| GO:0051340                                                          | 3.67391571978226e-08 | 19.1117056856187  | 19.1117056856187                                                                               |
| 8                                                                   | 100                  |                   | regulation of ligase activity                                                                  |
| GO:0031396                                                          | 1.60633534296587e-07 | 12.575766509434   | 12.575766509434                                                                                |
| 168                                                                 |                      | 0.848660992318871 | regulation of protein ubiquitination                                                           |
| GO:0031398                                                          | 2.37452569917641e-07 | 14.7475113122172  | 14.7475113122172                                                                               |
| 8                                                                   | 127                  |                   | positive regulation of protein ubiquitination                                                  |
| GO:0000216                                                          | 2.80051382406854e-06 | 17.5485585769781  | 17.5485585769781                                                                               |
| 6                                                                   | 79                   |                   | M/G1 transition of mitotic cell cycle                                                          |
| GO:0031145                                                          | 3.74283272588697e-06 | 16.6322930800543  | 16.6322930800543                                                                               |
| 6                                                                   | 83                   |                   | anaphase-promoting complex-dependent proteasomal ubiquitin-dependent protein catabolic process |
| GO:0006521                                                          | 9.77125334533065e-06 | 20.2573529411765  | 20.2573529411765                                                                               |
| 5                                                                   | 57                   |                   | regulation of cellular amino acid metabolic process                                            |
| GO:0010565                                                          | 1.23102059570465e-05 | 10.2676767676768  | 10.2676767676768                                                                               |
| 7                                                                   | 154                  |                   | regulation of cellular ketone metabolic process                                                |
| GO:0000209                                                          | 1.64392722055561e-05 | 9.79614325068871  | 9.79614325068871                                                                               |
| 7                                                                   | 161                  |                   | protein polyubiquitination                                                                     |
| Tissue: Nerve_Tibial=>Lung Type: asymmetric                         |                      |                   |                                                                                                |
| SourceGene: THNSL1(ENSG00000185875.8)                               |                      |                   |                                                                                                |
| TargetGeneSet: ISG15 SSU72 ATP13A2 IFI6 SDC3 YBX1 IFI44L IFI44 GBP4 |                      |                   |                                                                                                |
| GABPB1                                                              | ZNF687               | RNF187            | CMPK2                                                                                          |
| KCNN2                                                               | PCYOX1L              | NRM               | PSMB8                                                                                          |
| PARP12                                                              | PTK2                 | LY6E              | C9orf167                                                                                       |
| NDUFS8                                                              | FDX1                 | ARHGEF12          | NTN4                                                                                           |
| COX6A1                                                              | FBRSL1               | ZNF219            | ANKRD9                                                                                         |
| CX3CL1                                                              | PSMB10               | CHMP1A            | GIT1                                                                                           |
| UBXN6                                                               | ZNF358               | TRAPPC5           | MAP2K7                                                                                         |
| ATP5J                                                               | MX1                  | SUMO3             | DGCR2                                                                                          |
| GOBPID                                                              | Pvalue               | OddsRatio         | ExpCount                                                                                       |
| GO:0060337                                                          | 1.12793285414446e-07 | 21.7022751895991  | 21.7022751895991                                                                               |
| 7                                                                   | 72                   |                   | type I interferon-mediated signaling pathway                                                   |
| GO:0071357                                                          | 1.12793285414446e-07 | 21.7022751895991  | 21.7022751895991                                                                               |
| 7                                                                   | 72                   |                   | cellular response to type I interferon                                                         |
| GO:0034340                                                          | 1.24219943078799e-07 | 21.3719590268886  | 21.3719590268886                                                                               |
| 7                                                                   | 73                   |                   | response to type I interferon                                                                  |
| Tissue: Nerve_Tibial=>Lung Type: asymmetric                         |                      |                   |                                                                                                |
| SourceGene: UBE2S(ENSG00000108106.8)                                |                      |                   |                                                                                                |
| TargetGeneSet: MTND1P23 MTND2P28 DVL1 RP11 JTB BCAN                 |                      |                   |                                                                                                |
| ATP1A2                                                              | MIR4426              | ST13P19           | ANKS1B                                                                                         |
| H3F3AP6                                                             | CHCHD2P2             |                   | CTD                                                                                            |
| CDK6                                                                | STMN2                | TG                | AQP7P3                                                                                         |
| SLC1A2                                                              | C11orf31             |                   | PPP2R5B                                                                                        |
| CACNG3                                                              | TRADD                | TUSC5             | TMEM11                                                                                         |
| RP6                                                                 | PLP1                 | HTR2C             | RP1                                                                                            |

Stable4\_20PerPair

| GOBPID                                                          | Pvalue               | OddsRatio                                            | ExpCount           | Count       | Size         | Term                |
|-----------------------------------------------------------------|----------------------|------------------------------------------------------|--------------------|-------------|--------------|---------------------|
| GO:0060134                                                      | 3.98256092190817e-06 | 135                                                  | 0.0327312988720504 | 3           | 11           | prepulse inhibition |
| GO:0010976                                                      | 1.53398505003001e-05 | 31.3387888707038                                     |                    |             |              | 0.151754203861324   |
| 4                                                               | 51                   | positive regulation of neuron projection development |                    |             |              |                     |
| GO:0001964                                                      | 1.62097344171137e-05 | 77.1107142857143                                     |                    |             |              | 0.0505847346204415  |
| 3                                                               | 17                   | startle response                                     |                    |             |              |                     |
| Tissue: Lung=>Thyroid Type: asymmetric                          |                      |                                                      |                    |             |              |                     |
| SourceGene: ATP9B(ENSG00000166377.13)                           |                      |                                                      |                    |             |              |                     |
| TargetGeneSet: C1orf159 SLC45A1 WDTC1 CCDC28B TMEM234 RP4 HMCN1 |                      |                                                      |                    |             |              |                     |
| COL5A2                                                          | FAM134A              | STK25 NIT2                                           | CP FGFBP1          | RP11        | CTD          | PDLIM7 ADAMTS2      |
| CD109                                                           | ADAT2                | AP4M1 GFRA2                                          | CTHRC1 ANXA2P2     | DNM1        | COL5A1       | ZEB1 SLC25A45       |
| CAPN5                                                           | KRR1P1               | COL4A2-AS1                                           | SCFD1 XRCC3        | SLC28A2     | COL1A1       | PGPEP1 ZNF738       |
| DPY19L3                                                         | CHMP2A               | TSPY26P ADIG                                         | COL9A3             | LINC00266-1 | TSSK1A       | RGAG1               |
| GOBPID                                                          | Pvalue               | OddsRatio                                            | ExpCount           | Count       | Size         | Term                |
| GO:0030199                                                      | 7.36751988167153e-09 | 98.8461538461538                                     |                    |             |              | 0.0707909487232717  |
| 5                                                               | 33                   | collagen fibril organization                         |                    |             |              |                     |
| GO:0043588                                                      | 4.03512162778021e-06 | 45.3049645390071                                     |                    |             |              | 0.10940419348142    |
| 4                                                               | 51                   | skin development                                     |                    |             |              |                     |
| Tissue: Thyroid=>Lung Type: asymmetric                          |                      |                                                      |                    |             |              |                     |
| SourceGene: C1orf177(ENSG00000162398.7)                         |                      |                                                      |                    |             |              |                     |
| TargetGeneSet: FGR BTBD8 C1orf61 SELL IKBKE LBR CCT4 IL1R2      |                      |                                                      |                    |             |              |                     |
| SPOPL                                                           | SH3BP5               | CMTM6 RP11                                           | FAM208A FAM55C     | MIR567      | CPA3         | CTD TLR1 TLR6       |
| KIT                                                             | FYB                  | CTB MAP3K5                                           | NCF1C ATXN7L1      | MTPN        | PCMTD1       | NTNG2 ABCA2 FUT7    |
| ABI1                                                            | ACBD5                | RASGEF1A                                             | IKZF5 CLEC4D       | IRAK3       | PLXNC1       | APAF1 GIT2          |
| GLT1D1                                                          | ZDHHC20              | TNFSF13B                                             | C14orf118          | CCNK        | DYX1C1-CCPG1 | CORO1A TNS4         |
| NKIRAS2                                                         | BECN1                | FMNL1 UTP18                                          | MBP C19orf38       |             | RAB8A        | CD177 VSTM1         |
| SIRPD                                                           | PMEPA1               | ITGB2 IL17RA                                         | GTPBP1 RP3         | NFAM1       | PANX2        | CFP PRAF2           |
| GOBPID                                                          | Pvalue               | OddsRatio                                            | ExpCount           | Count       | Size         | Term                |
| GO:0002764                                                      | 2.63465017376357e-06 | 10.7265151515152                                     |                    |             |              | 0.892394989966092   |
| 8                                                               | 248                  | immune response-regulating signaling pathway         |                    |             |              |                     |
| GO:0050778                                                      | 5.22588770360399e-06 | 8.28011791680314                                     |                    |             |              | 1.30980554978894    |
| 9                                                               | 364                  | positive regulation of immune response               |                    |             |              |                     |
| GO:0002253                                                      | 1.04359138787685e-05 | 8.81474539206498                                     |                    |             |              | 1.07591170161235    |
| 8                                                               | 299                  | activation of immune response                        |                    |             |              |                     |
| Tissue: Lung=>Thyroid Type: cluster                             |                      |                                                      |                    |             |              |                     |
| SourceGene: CCDC104(ENSG00000163001.7)                          |                      |                                                      |                    |             |              |                     |
| TargetGeneSet: WASH7P MTND1P23 MTND2P28 NOL9 DFFA CLCN6         |                      |                                                      |                    |             |              |                     |
| DNAJC16                                                         | NECAP2               | RP4 KDM1A                                            | TCEB3 PAQR7        | RP1         | EYA3         | MED18 YTHDF2        |
| TXLNA                                                           | ZMYM6NB              | ZMYM1 EIF2C1                                         | KDM4A CCDC24       | TOE1        | IPP          | NSUN4 SELRC1        |
| DDX20                                                           | BCL9                 | RP11 RPRD2                                           | GOLPH3L SCN1M1     | PYG02       | FLAD1        | ETV3 HMG1P4         |
| RBBP5                                                           | ZC3H11B              | C2orf18 MSH6                                         | ERLEC1 GPR75       | DCTN1       | C2orf68      | KDM3A TMEM127 LYG2  |
| POLR1B                                                          | RBP4                 | AMMECR1L                                             | STAM2 KRT8P15      | RQCD1       | EIF4E2       | HMGB1P5 ACAA1       |
| MYD88                                                           | PPM1M                | PDE12 FAM3D                                          | QTRTD1 MSL2        | P2RY1       | RAP2B        | ABCF3 CRYGS         |
| LRCH3                                                           | TADA2B               | ENOPH1 AGPAT9                                        | PLRG1 MARVELD2     |             | PHAX         | MTND5P11            |
| RBM22                                                           | ABCF1                | C6orf47 AGPAT1                                       | ZBTB9 TAF8         | RPL7L1      | BEND6        | FAM120B FTSJ2       |
| FBXL18                                                          | INMT                 | AQP1 URGCP                                           | YKT6 PURB          | SNORA5A     | ZNF713       | BAZ1B FAM200A       |
| ZNF498                                                          | MEPCE                | GCC1 METTL2A                                         | SMO ZC3HC1         | ZNF212      | ZNF746       | CTD INTS9 TTI2      |
| SGK196                                                          | YTHDF3               | PDX1 KIAA1429                                        | TSPYL5 UTP23       | TSSK5P1     | ZNF517       | RRAGA               |
| KLHL9                                                           | STOML2               | FOXE1 LINC00256B                                     | ZBTB6 TBC1D13      | EXOSC2      | BRD3         | C9orf167            |
| C10orf140                                                       | THNSL1               | ADO AP3M1                                            | ADK SMC3           | SIRT3       | CHRNA10      | SLC35C1             |
| ARHGAP1                                                         | HEXIM1               | BTBD18 MTA2                                          | HNRNPUL2           | ZBTB3       | DPF2         | C11orf68            |
| EIF1AD                                                          | IL18BP               | FAM76B MSANTD4                                       | PAFAH1B2           | DDX6        | PKNOX2       | CERS5 SMUG1         |
| ZC3H10                                                          | CAND1                | TDG BRAP                                             | RNF6 KBTBD7        | KCNRG       | ALG11        | CHAMP1 SALL2        |
| RBM23                                                           | PROX2                | DLST MLH3                                            | GOLGA8IP           | TJP1        | RNF111       | PLEKHO2 FEM1B NRG4  |
| WASH3P                                                          | POLR3K               | CENP8IP3                                             | THUMP1 MAZ         | TBC1D10B    |              | CIAPIN1 CTRL        |
| NFATC3                                                          | CHTF8                | CENPBD1 PRDM7                                        | VPS53 SLC16A13     | TP53        | ERAL1        | CRLF3               |
| ZNF830                                                          | TADA2A               | MED1 WIPF2                                           | IGFBP4 CNP         | FAM134C     | VPS25        | RUNDC1 ZNF652       |
| PPP1R9B                                                         | ANKRD40              | TACO1 CANT1                                          | ZBTB7A FEM1A       | ZNF557      | ZNF562       | FBXL12 ZNF440       |
| ZNF429                                                          | C19orf12             | ZNF526                                               | BLOC1S3 CPT1C      | SIGLEC7     | ZNF613       | ZNF542 ZNF264       |
| ZNF543                                                          | ZNF547               | ZNF549                                               | ZNF134             | AVP         | FASTKD5      | NANP                |
| ZSWIM3                                                          | ZSWIM1               | NCOA5 TP53RK                                         | ZNFX1 PARD6B       | ADNP        | CSTF1        | C20orf11            |
| DNAJC28                                                         | SIM2                 | NDUFV3 NF2                                           | NUP50 GEMIN8       | GSPT2       | SMC1A        | BHLHB9              |

| Stable4_20PerPair                                               |          |           |          |         |         |           |          |         |             |
|-----------------------------------------------------------------|----------|-----------|----------|---------|---------|-----------|----------|---------|-------------|
| GOBPID                                                          | Pvalue   | OddsRatio | ExpCount | Count   | Size    | Term      |          |         |             |
| Tissue: Lung=>Thyroid Type: asymmetric                          |          |           |          |         |         |           |          |         |             |
| SourceGene: CES1(ENSG00000198848.7)                             |          |           |          |         |         |           |          |         |             |
| TargetGeneSet: NOL9 DNAJC16 RP11 WASF2 EYA3 ZSCAN20 EIF2C1 MFI2 |          |           |          |         |         |           |          |         |             |
| SF3A3                                                           | RBBP5    | DIEXF     | HEATR1   | FKBP1B  | POLR1B  | C2orf76   | CLN5     | ZXDC    | UBQLN4P1    |
| MYNN                                                            | ABCF3    | RNF168    | NOP14    | SRP72   | NUP155  | CTB       | DAGLB    | ZNF713  | MEPCE       |
| CBLL1                                                           | TNPO3    | PRSS37    | TRIM35   | SGK196  | ZNF623  | LINC00476 |          | TBC1D13 | EXOSC2 ADK  |
| HIF1AN                                                          | C10orf2  | SMC3      | CTR9     | SPTY2D1 | NAT10   | NUP160    | ZBTB3    | EIF1AD  | DDX6        |
| LPCAT3                                                          | KIAA1467 |           | DDX23    | CAND1   | BRAP    | SUPT16H   | C14orf21 |         | HMG2P5 TSR1 |
| C17orf85                                                        |          | NLGN2     | TMEM199  | FLOT2   | FAM134C | FTSJ3     | NOL11    | CANT1   | SUGP1       |
| KCNJ14                                                          | C19orf76 |           | ZNF264   | ZNF543  | ZNF304  | ZNF547    | ZNF749   | DSTN    | CRNKL1      |

| GOBPID     | Pvalue | OddsRatio | ExpCount             | Count            | Size | Term                                            |  |  |  |
|------------|--------|-----------|----------------------|------------------|------|-------------------------------------------------|--|--|--|
| GO:0071843 | 13     | 239       | 3.11080879409177e-11 | 15.9719764011799 |      | 1.05847346204415                                |  |  |  |
|            |        |           |                      |                  |      | cellular component biogenesis at cellular level |  |  |  |
| GO:0022613 | 12     | 225       | 2.4363836226506e-10  | 15.3564463705309 |      | 0.996470832468341                               |  |  |  |
|            |        |           |                      |                  |      | ribonucleoprotein complex biogenesis            |  |  |  |
| GO:0022618 | 6      | 95        | 3.79493421339188e-06 | 16.6191398682681 |      | 0.420732129264411                               |  |  |  |
|            |        |           |                      |                  |      | ribonucleoprotein complex assembly              |  |  |  |
| GO:0042254 | 7      | 149       | 4.08689031830945e-06 | 12.3196194712132 |      | 0.659885129056813                               |  |  |  |
|            |        |           |                      |                  |      | ribosome biogenesis                             |  |  |  |
| GO:0071826 | 6      | 100       | 5.11622235357972e-06 | 15.7296404988995 |      | 0.442875925541485                               |  |  |  |
|            |        |           |                      |                  |      | ribonucleoprotein complex subunit organization  |  |  |  |
| GO:0006364 | 6      | 104       | 6.42344639483031e-06 | 15.0833919774806 |      | 0.460590962563144                               |  |  |  |
|            |        |           |                      |                  |      | rRNA processing                                 |  |  |  |
| GO:0016072 | 6      | 110       | 8.88162284088054e-06 | 14.2072281167109 |      | 0.487163518095634                               |  |  |  |
|            |        |           |                      |                  |      | rRNA metabolic process                          |  |  |  |

| Tissue: Lung=>Thyroid Type: cluster                            |          |         |           |         |           |          |           |         |             |
|----------------------------------------------------------------|----------|---------|-----------|---------|-----------|----------|-----------|---------|-------------|
| SourceGene: CHIC2(ENSG00000109220.6)                           |          |         |           |         |           |          |           |         |             |
| TargetGeneSet: TP73-AS1 KLHL21 ERRFI1 FBXO44 RP3 DNAJC16 TCEB3 |          |         |           |         |           |          |           |         |             |
| TXLNA                                                          | RP4      | YIPF1   | CTH       | ST7L    | BCL2L15   | GABPB1   | SLC27A3   | PYGO2   | FLAD1 BAP1  |
| NAV1                                                           | PFKFB2   | IRF6    | VSNL1     | BRE     | NFU1      | AMMECR1L |           | STAM2   | CFLAR RP11  |
| RQCD1                                                          | PSMD1    | VGLL4   | SATB1     | CNOT10  | MLH1      | USP4     | TFG       | QTRTD1  | TMEM39A     |
| CCDC37                                                         | COPG1    | KLHL24  | CRYGS     | UBXN7   | TEC       | SCFD2    | ANKRD17   | SOWAHB  | MRPL1       |
| SEC31A                                                         | SEC24D   | TMEM154 | DHX29     | CTD     | GTF2H2C   | ANKRA2   | TMEM167A  |         | ARSK        |
| SAR1B                                                          | CAMK2A   | MYOZ3   | SAP30L    | RARS    | BNIP1     | SNCB     | GRM6      | TRIM27  | ABCF1       |
| PPP1R10                                                        | HSPA1L   | AGPAT1  | LINC00336 |         | PPIL1     | BYSL     | COQ3      | RTN4IP1 | SESN1       |
| LATS1                                                          | IGF2R    | DLL1    | C7orf26   | POLR2J4 | TBL2      | ZNF3     | SRRT      | CEP41   | PPP2R2A     |
| CEBPD                                                          | RAD21    | PLAA    | FAM219A   | GBA2    | ALDH1B1   | NCBP1    | TGFBR1    | C9orf91 | GOLGA2 EDF1 |
| CCNY                                                           | TIMM23   | STOX1   | PPP3CB    | SEC24C  | AP3M1     | TBC1D12  | ALDH18A1  |         | ENTPD7 GBF1 |
| RNU4-5P                                                        | ZNF195   | CHRNA10 | C11orf42  |         | MUC15     | HIPK3    | CAPRIN1   | PSMC3   | MTCH2       |
| CTNND1                                                         | SLC22A20 |         | UCP3      | ACER3   | ZBTB16    | PAFAH1B2 |           | ARCN1   | NOP2 ASUN   |
| PRKAG1                                                         | AQP6     | CERS5   | TFCP2     | COPZ1   | METTL1    | METTL21B |           | ALDH1L2 | CKAP4       |
| MYO1H                                                          | KCTD10   | ANAPC7  | ZNF140    | N4BP2L1 | CYCSP34   | TDRD3    | GNPNAT1   | ARG2    | PGF         |
| EIF2B2                                                         | DIO2     | GTF2A1  | PSMC1     | CALM1   | FAM181A   | MARK3    | TJP1      | TRIP4   | C15orf39    |
| NRG4                                                           | AKAP13   | IGF1R   | PMM2      | UBFD1   | DCTN5     | CIAPIN1  | GOT2      | CTCF    | HAS3        |
| AFG3L1P                                                        | TP53     | KCNAB3  | VAMP2     | ZSWIM7  | DRG2      | UTP6     | PIGW      | PSME3   | BRCA1       |
| TMEM106A-AS1                                                   |          | UBTF    | RSAD1     | MBTD1   | FAM100B   | ZNF562   | ZNF44     | MPV17L2 | LSM4        |
| ZNF429                                                         | ZNF565   | ZNF790  | PSMC4     | ZNF470  | ZNF586    | ZNF135   | ZNF544    | FKBP1A  | CDK5RAP1    |
| MANBAL                                                         | SLC13A3  | DOK5    | RP1       | CTSZ    | LINC00315 |          | ARL2BPP10 |         | KREMEN1     |
| L3MBTL2                                                        | APOO     | BCOR    | NDP       | WBP5    | RP6       | LHFPL1   |           |         |             |

| GOBPID     | Pvalue | OddsRatio | ExpCount             | Count            | Size             | Term                                        |  |   |    |
|------------|--------|-----------|----------------------|------------------|------------------|---------------------------------------------|--|---|----|
| GO:0048199 | 8      | 27        | 3.18112059422577e-10 | 40.0673684210526 |                  | 0.295204484118746                           |  |   |    |
|            |        |           |                      |                  |                  | vesicle targeting, to, from or within Golgi |  |   |    |
| GO:0006901 | 8      | 35        | 3.13155329490008e-09 | 28.1797530864198 |                  | 0.382672479413189                           |  |   |    |
|            |        |           |                      |                  |                  | vesicle coating                             |  |   |    |
| GO:0006900 | 37     |           | 5.04272049283586e-09 | 26.2326436781609 |                  | 0.4045394782368 8                           |  |   |    |
|            |        |           |                      |                  |                  | membrane budding                            |  |   |    |
| GO:0006903 | 37     |           | 5.04272049283586e-09 | 26.2326436781609 |                  | 0.4045394782368 8                           |  |   |    |
|            |        |           |                      |                  |                  | vesicle targeting                           |  |   |    |
| GO:0051650 |        |           | 4.45154798487893e-08 | 19.004           | 0.52480797176666 |                                             |  | 8 | 48 |
|            |        |           |                      |                  |                  | establishment of vesicle localization       |  |   |    |
| GO:0051648 |        |           | 5.08809713526669e-07 | 13.3202339181287 |                  | 0.710677461767352                           |  |   |    |

Stable4\_20PerPair

|                                                                   |         |                                                                        |                  |                  |      |                   |  |                   |   |
|-------------------------------------------------------------------|---------|------------------------------------------------------------------------|------------------|------------------|------|-------------------|--|-------------------|---|
| 8                                                                 | 65      | vesicle localization                                                   |                  |                  |      |                   |  |                   |   |
| GO:0031400                                                        |         | 1.03206276884596e-06                                                   | 5.15568641884431 |                  |      |                   |  | 3.28004982354162  |   |
| 15                                                                | 300     | negative regulation of protein modification process                    |                  |                  |      |                   |  |                   |   |
| GO:0002474                                                        |         | 1.32864507079132e-06                                                   | 9.53221476510067 |                  |      |                   |  | 1.08241644176874  |   |
| 9                                                                 | 99      | antigen processing and presentation of peptide antigen via MHC class I |                  |                  |      |                   |  |                   |   |
| GO:0051656                                                        |         | 1.57335645071639e-06                                                   | 9.32367960315144 |                  |      |                   |  | 1.10428344059235  |   |
| 9                                                                 | 101     | establishment of organelle localization                                |                  |                  |      |                   |  |                   |   |
| GO:0048002                                                        |         | 2.76127071889211e-06                                                   | 8.660158633313   | 1.18081793647498 |      |                   |  |                   | 9 |
| 108                                                               | antigen | processing and presentation of peptide antigen                         |                  |                  |      |                   |  |                   |   |
| GO:0032269                                                        |         | 3.91005541938262e-06                                                   | 4.33616061006926 |                  |      |                   |  | 4.13286277766245  |   |
| 16                                                                | 378     | negative regulation of cellular protein metabolic process              |                  |                  |      |                   |  |                   |   |
| GO:0016050                                                        |         | 6.73855416381985e-06                                                   | 9.13092369477912 |                  |      |                   |  | 0.994948446474292 |   |
| 8                                                                 | 91      | vesicle organization                                                   |                  |                  |      |                   |  |                   |   |
| GO:0035964                                                        |         | 9.10906238497008e-06                                                   | 41.2236652236652 |                  |      |                   |  | 0.14213549235347  |   |
| 4                                                                 | 13      | COPI-coated vesicle budding                                            |                  |                  |      |                   |  |                   |   |
| GO:0048194                                                        |         | 9.10906238497008e-06                                                   | 41.2236652236652 |                  |      |                   |  | 0.14213549235347  |   |
| 4                                                                 | 13      | Golgi vesicle budding                                                  |                  |                  |      |                   |  |                   |   |
| GO:0048200                                                        |         | 9.10906238497008e-06                                                   | 41.2236652236652 |                  |      |                   |  | 0.14213549235347  |   |
| 4                                                                 | 13      | Golgi transport vesicle coating                                        |                  |                  |      |                   |  |                   |   |
| GO:0048205                                                        |         | 9.10906238497008e-06                                                   | 41.2236652236652 |                  |      |                   |  | 0.14213549235347  |   |
| 4                                                                 | 13      | COPI coating of Golgi vesicle                                          |                  |                  |      |                   |  |                   |   |
| GO:0051248                                                        |         | 1.46951828398415e-05                                                   | 3.87365778831404 |                  |      |                   |  | 4.59206975295827  |   |
| 16                                                                | 420     | negative regulation of protein metabolic process                       |                  |                  |      |                   |  |                   |   |
| GO:0031396                                                        |         | 1.57121162212506e-05                                                   | 6.04473144030106 |                  |      |                   |  | 1.83682790118331  |   |
| 10                                                                | 168     | regulation of protein ubiquitination                                   |                  |                  |      |                   |  |                   |   |
| GO:0048207                                                        |         | 1.70955476155306e-05                                                   | 33.7237308146399 |                  |      |                   |  | 0.164002491177081 |   |
| 4                                                                 | 15      | vesicle targeting, rough ER to cis-Golgi                               |                  |                  |      |                   |  |                   |   |
| GO:0048208                                                        |         | 1.70955476155306e-05                                                   | 33.7237308146399 |                  |      |                   |  | 0.164002491177081 |   |
| 4                                                                 | 15      | COPII vesicle coating                                                  |                  |                  |      |                   |  |                   |   |
| GO:0090114                                                        |         | 1.70955476155306e-05                                                   | 33.7237308146399 |                  |      |                   |  | 0.164002491177081 |   |
| 4                                                                 | 15      | COPII-coated vesicle budding                                           |                  |                  |      |                   |  |                   |   |
| Tissue: Thyroid=>Lung Type: asymmetric                            |         |                                                                        |                  |                  |      |                   |  |                   |   |
| SourceGene: CLEC17A(ENSG00000187912.7)                            |         |                                                                        |                  |                  |      |                   |  |                   |   |
| TargetGeneSet: MXRA8 RPL11 PRDX3P2 RNF11 EFNA4 APOA2 SMG7 DIEXF   |         |                                                                        |                  |                  |      |                   |  |                   |   |
| COX5B MZT2B SETD5 RPL15 CRTAP RPL29 RP11 C4orf48 OCIAD1 WDFY3-AS2 |         |                                                                        |                  |                  |      |                   |  |                   |   |
| RPL34 NDUFS4 SYNGAP1 C6orf162 LINC00271 C6orf72 SEPT7 GBAS        |         |                                                                        |                  |                  |      |                   |  |                   |   |
| CHCHD2 NDUFA5 C8orf40 RAB2A POLR2K MRPL41 FAM204A RPLP2 SVIP FAU  |         |                                                                        |                  |                  |      |                   |  |                   |   |
| ATP5L ZCRB1 ATXN2 SIVA1 RPLP1 AKAP13 TTLL13 NDUFB10 BCL7C RPL13   |         |                                                                        |                  |                  |      |                   |  |                   |   |
| WDR81 ALOX15B RPS7P1 CHST9 IER3IP1 ATP5D RPS15 C19orf70 ZNF414    |         |                                                                        |                  |                  |      |                   |  |                   |   |
| C19orf60 ZNF428 SEL1L2 ELMO2 MORC2 COX7B TAF9B FERP1              |         |                                                                        |                  |                  |      |                   |  |                   |   |
| GOBPID                                                            | Pvalue  | OddsRatio                                                              | ExpCount         | Count            | Size | Term              |  |                   |   |
| GO:0000184                                                        |         | 1.15108487616834e-12                                                   | 40.9977064220183 |                  |      | 0.345858418102553 |  |                   |   |
| 10                                                                | 119     | nuclear-transcribed mRNA catabolic process, nonsense-mediated decay    |                  |                  |      |                   |  |                   |   |
| GO:0006415                                                        |         | 3.90611021708204e-12                                                   | 47.6507760532151 |                  |      | 0.264479966784306 |  |                   |   |
| 9                                                                 | 91      | translational termination                                              |                  |                  |      |                   |  |                   |   |
| GO:0019080                                                        |         | 1.2699145793037e-11                                                    | 31.6223404255319 |                  |      | 0.438862362466265 |  |                   |   |
| 10                                                                | 151     | viral genome expression                                                |                  |                  |      |                   |  |                   |   |
| GO:0019083                                                        |         | 1.2699145793037e-11                                                    | 31.6223404255319 |                  |      | 0.438862362466265 |  |                   |   |
| 10                                                                | 151     | viral transcription                                                    |                  |                  |      |                   |  |                   |   |
| GO:0006414                                                        |         | 1.45494050106561e-11                                                   | 40.6619318181818 |                  |      | 0.305169192443429 |  |                   |   |
| 9                                                                 | 105     | translational elongation                                               |                  |                  |      |                   |  |                   |   |
| GO:0006614                                                        |         | 1.45494050106561e-11                                                   | 40.6619318181818 |                  |      | 0.305169192443429 |  |                   |   |
| 9                                                                 | 105     | SRP-dependent cotranslational protein targeting to membrane            |                  |                  |      |                   |  |                   |   |
| GO:0006613                                                        |         | 1.5866521412126e-11                                                    | 40.2399250234302 |                  |      | 0.308075565704795 |  |                   |   |
| 9                                                                 | 106     | cotranslational protein targeting to membrane                          |                  |                  |      |                   |  |                   |   |
| GO:0045047                                                        |         | 1.5866521412126e-11                                                    | 40.2399250234302 |                  |      | 0.308075565704795 |  |                   |   |
| 9                                                                 | 106     | protein targeting to ER                                                |                  |                  |      |                   |  |                   |   |
| GO:0072599                                                        |         | 1.5866521412126e-11                                                    | 40.2399250234302 |                  |      | 0.308075565704795 |  |                   |   |
| 9                                                                 | 106     | establishment of protein localization to endoplasmic reticulum         |                  |                  |      |                   |  |                   |   |
| GO:0000956                                                        |         | 3.90262604607315e-11                                                   | 28.0070754716981 |                  |      | 0.491177081170853 |  |                   |   |
| 10                                                                | 169     | nuclear-transcribed mRNA catabolic process                             |                  |                  |      |                   |  |                   |   |
| GO:0070972                                                        |         | 4.21404579777737e-11                                                   | 35.7798165137615 |                  |      | 0.342952044841187 |  |                   |   |

Stable4\_20PerPair

|                                                                    |          |                                                    |                  |          |          |           |                   |                   |          |
|--------------------------------------------------------------------|----------|----------------------------------------------------|------------------|----------|----------|-----------|-------------------|-------------------|----------|
| 9                                                                  | 118      | protein localization to endoplasmic reticulum      |                  |          |          |           |                   |                   |          |
| GO:0006402                                                         |          | 6.52857140390416e-11                               | 26.4899553571429 |          |          |           |                   | 0.517334440523147 |          |
| 10                                                                 | 178      | mRNA catabolic process                             |                  |          |          |           |                   |                   |          |
| GO:0006401                                                         |          | 2.62586613772342e-10                               | 22.7788461538462 |          |          |           |                   | 0.595806518580029 |          |
| 10                                                                 | 205      | RNA catabolic process                              |                  |          |          |           |                   |                   |          |
| GO:0006413                                                         |          | 4.11871732601169e-10                               | 27.2078830260648 |          |          |           |                   | 0.441768735727631 |          |
| 9                                                                  | 152      | translational initiation                           |                  |          |          |           |                   |                   |          |
| GO:0006612                                                         |          | 4.36708395855424e-10                               | 27.0170454545455 |          |          |           |                   | 0.444675108988997 |          |
| 9                                                                  | 153      | protein targeting to membrane                      |                  |          |          |           |                   |                   |          |
| GO:0043624                                                         |          | 4.36708395855424e-10                               | 27.0170454545455 |          |          |           |                   | 0.444675108988997 |          |
| 9                                                                  | 153      | cellular protein complex disassembly               |                  |          |          |           |                   |                   |          |
| GO:0043241                                                         |          | 5.81757041012065e-10                               | 26.1012812690665 |          |          |           |                   | 0.459206975295827 |          |
| 9                                                                  | 158      | protein complex disassembly                        |                  |          |          |           |                   |                   |          |
| GO:0019058                                                         |          | 8.43176571987788e-10                               | 20.0622171945701 |          |          |           |                   | 0.671372223375545 |          |
| 10                                                                 | 231      | viral infectious cycle                             |                  |          |          |           |                   |                   |          |
| GO:0034623                                                         |          | 1.37023776962067e-09                               | 23.5438016528926 |          |          |           |                   | 0.505708947477683 |          |
| 9                                                                  | 174      | cellular macromolecular complex disassembly        |                  |          |          |           |                   |                   |          |
| GO:0032984                                                         |          | 1.7604437071694e-09                                | 22.8433155080214 |          |          |           |                   | 0.520240813784513 |          |
| 9                                                                  | 179      | macromolecular complex disassembly                 |                  |          |          |           |                   |                   |          |
| GO:0022415                                                         |          | 2.65183685286986e-09                               | 17.69875         |          |          |           | 0.755657047955159 |                   | 10       |
| 260                                                                |          | viral reproductive process                         |                  |          |          |           |                   |                   |          |
| GO:0072594                                                         |          | 5.56069320907923e-09                               | 19.8797202797203 |          |          |           |                   | 0.592900145318663 |          |
| 9                                                                  | 204      | establishment of protein localization to organelle |                  |          |          |           |                   |                   |          |
| GO:0022904                                                         |          | 1.0207041821532e-08                                | 32.1797752808989 |          |          |           |                   | 0.279011833091136 |          |
| 7                                                                  | 96       | respiratory electron transport chain               |                  |          |          |           |                   |                   |          |
| GO:0071845                                                         |          | 9.73244793540003e-08                               | 14.0171900826446 |          |          |           |                   | 0.825410006227943 |          |
| 9                                                                  | 284      | cellular component disassembly at cellular level   |                  |          |          |           |                   |                   |          |
| GO:0022900                                                         |          | 1.03666298067087e-07                               | 22.4913385826772 |          |          |           |                   | 0.389454017023043 |          |
| 7                                                                  | 134      | electron transport chain                           |                  |          |          |           |                   |                   |          |
| GO:0022411                                                         |          | 1.09661073000473e-07                               | 13.8123167155425 |          |          |           |                   | 0.837035499273407 |          |
| 9                                                                  | 288      | cellular component disassembly                     |                  |          |          |           |                   |                   |          |
| GO:0045333                                                         |          | 1.54341118457122e-07                               | 21.1466666666667 |          |          |           |                   | 0.412705003113971 |          |
| 7                                                                  | 142      | cellular respiration                               |                  |          |          |           |                   |                   |          |
| GO:0016032                                                         |          | 4.76546954001427e-07                               | 9.89795918367347 |          |          |           |                   | 1.31077434087606  |          |
| 10                                                                 | 451      | viral reproduction                                 |                  |          |          |           |                   |                   |          |
| GO:0006119                                                         |          | 6.63194113585121e-07                               | 36.6037735849057 |          |          |           |                   | 0.168569649159228 |          |
| 5                                                                  | 58       | oxidative phosphorylation                          |                  |          |          |           |                   |                   |          |
| GO:0033365                                                         |          | 6.80668467421228e-06                               | 8.19651253918495 |          |          |           |                   | 1.37471455262612  |          |
| 9                                                                  | 473      | protein localization to organelle                  |                  |          |          |           |                   |                   |          |
| GO:0006605                                                         |          | 6.92388962939753e-06                               | 8.1782991202346  |          |          |           | 1.37762092588748  |                   | 9        |
| 474                                                                |          | protein targeting                                  |                  |          |          |           |                   |                   |          |
| Tissue: Lung=>Thyroid Type: cluster                                |          |                                                    |                  |          |          |           |                   |                   |          |
| SourceGene: DHX40(ENSG00000108406.4)                               |          |                                                    |                  |          |          |           |                   |                   |          |
| TargetGeneSet: NOC2L DNAJC16 ARHGEF19 ARHGEF19-AS1 PAQR7 RP11 NCDN |          |                                                    |                  |          |          |           |                   |                   |          |
| CCDC24                                                             | C1orf123 | INSL5                                              | WDR77            | ST7L     | MOV10    | RP4       | PIAS3             | TARS2             |          |
| FLAD1                                                              | CCT3     | METTL13                                            | DHX9             | BAP1     | NAV1     | C1orf131  | ODC1              | EIF2B4            |          |
| SRBD1                                                              | POLR1A   | PSMD14                                             | RQCD1            | PSMD1    | C3orf62  | PBRM1     | WNT5A             | WNT5A-AS1         |          |
| GRAMD1C                                                            | QTRTD1   | RNF13                                              | MRPL47           | KLHL24   | EIF2B5   | AP2M1     | ABCF3             | ALG3              | PSMD2    |
| SCFD2                                                              | PPAT     | SEC31A                                             | ETFDH            | MFAP3L   | TRAPPC11 |           | DHX29             | ARSB              | PAIP2    |
| GALNT10                                                            | SAP30L   | TRIM27                                             | PRR3             | PTMAP1   | TUBB     | VARS      | WDR46             | PPIL1             | AARS2    |
| GPR63                                                              | RP1      | LATS1                                              | IQCE             | YKT6     | TBRG4    | COPS6     | ORC5              | PUS7              | METTL2A  |
| CEP41                                                              | SLC35B4  | TTC26                                              | ABCB8            | SMARCD3  | YBX1P4   | BNIP3L    | TRIM35            | CHMP4C            | VCP      |
| STOML2                                                             | FXN      | NCBP1                                              | ANKS6            | DNM1     | NGB      | C10orf114 |                   | C10orf140         |          |
| RRP12                                                              | ENTPD7   | RRP8                                               | RCOR2            | CD248    | RIN1     | C2CD2L    | NOP2              | COPS7A            | TUBA1C   |
| TFCP2                                                              | TARBP2   | CYP27B1                                            | METTL1           | NT5DC3   | ALDH1L2  | CKAP4     | POLR3B            | MYO1H             | KCTD10   |
| ANAPC7                                                             | ATXN2    | GTF2H3                                             | PUS1             | GOLGA3   | N4BP2L1  | PRMT5-AS1 |                   | PRMT5             | ARG2     |
| TUBGCP4                                                            | CTD      | GLYR1                                              | TBC1D10B         |          | E2F4     | CTCF      | C16orf46          |                   | COX4NB   |
| FAM57A                                                             | TSR1     | ANKFY1                                             | ERAL1            | UTP6     | LIG3     | TADA2A    | LEPREL4           | PSME3             | TMEM106A |
| ATXN7L3                                                            | UBTF     | PNPO                                               | RSAD1            | INTS2    | GPS1     | NACC1     | PRKACA            | PIK3R2            | RAB3A    |
| C19orf12                                                           |          | ZNF790                                             | PSMC4            | GRWD1    | ZNF135   | NSFL1C    | NOP56             | ZNF341            | ELMO2    |
| ZFP64                                                              | GTPBP5   | PATZ1                                              | L3MBTL2          | KIAA0930 |          | FAM123B   |                   |                   | ADNP     |
| GOBPID                                                             | Pvalue   | OddsRatio                                          | ExpCount         | Count    | Size     | Term      |                   |                   |          |
| GO:0034660                                                         |          | 6.22355165320264e-09                               | 7.26736705996444 |          |          |           |                   | 2.58355823126427  |          |

STable4\_20PerPair

|                                        |         |                                                                     |                  |                   |       |                   |          |                   |       |      |
|----------------------------------------|---------|---------------------------------------------------------------------|------------------|-------------------|-------|-------------------|----------|-------------------|-------|------|
| 16                                     | 285     | ncRNA metabolic process                                             |                  |                   |       |                   |          |                   |       |      |
| GO:0022613                             |         | 1.60833835969351e-08                                                | 8.00121521448536 |                   |       |                   |          | 2.03965123520864  |       |      |
| 14                                     | 225     | ribonucleoprotein complex biogenesis                                |                  |                   |       |                   |          |                   |       |      |
| GO:0071843                             |         | 3.44876780339617e-08                                                | 7.49591642924976 |                   |       |                   |          | 2.16656286762162  |       |      |
| 14                                     | 239     | cellular component biogenesis at cellular level                     |                  |                   |       |                   |          |                   |       |      |
| GO:0032269                             |         | 1.68553856327261e-06                                                | 4.97185807922485 |                   |       |                   |          | 3.42661407515051  |       |      |
| 15                                     | 378     | negative regulation of cellular protein metabolic process           |                  |                   |       |                   |          |                   |       |      |
| GO:0022618                             |         | 2.30828000140848e-06                                                | 10.6405008877675 |                   |       |                   |          | 0.861186077088091 |       |      |
| 8                                      | 95      | ribonucleoprotein complex assembly                                  |                  |                   |       |                   |          |                   |       |      |
| GO:0071826                             |         | 3.4025624660899e-06                                                 | 10.0586779780841 |                   |       |                   |          | 0.906511660092727 |       |      |
| 8                                      | 100     | ribonucleoprotein complex subunit organization                      |                  |                   |       |                   |          |                   |       |      |
| GO:0051248                             |         | 6.10921304185342e-06                                                | 4.44284802043423 |                   |       |                   |          | 3.80734897238945  |       |      |
| 15                                     | 420     | negative regulation of protein metabolic process                    |                  |                   |       |                   |          |                   |       |      |
| GO:0071158                             |         | 7.85092709955775e-06                                                | 11.0173442333186 |                   |       |                   |          | 0.725209328074182 |       |      |
| 7                                      | 80      | positive regulation of cell cycle arrest                            |                  |                   |       |                   |          |                   |       |      |
| GO:0006521                             |         | 1.22894247264736e-05                                                | 13.4296470588235 |                   |       |                   |          | 0.516711646252854 |       |      |
| 6                                      | 57      | regulation of cellular amino acid metabolic process                 |                  |                   |       |                   |          |                   |       |      |
| GO:0034470                             |         | 1.38935912753098e-05                                                | 6.14615050021749 |                   |       |                   |          | 1.81302332018545  |       |      |
| 10                                     | 200     | ncRNA processing                                                    |                  |                   |       |                   |          |                   |       |      |
| GO:0031400                             |         | 1.80428717651274e-05                                                | 4.91316526610644 |                   |       |                   |          | 2.71953498027818  |       |      |
| 12                                     | 300     | negative regulation of protein modification process                 |                  |                   |       |                   |          |                   |       |      |
| GO:0031397                             |         | 1.9787170992772e-05                                                 | 9.45398481973434 |                   |       |                   |          | 0.833990727285309 |       |      |
| 7                                      | 92      | negative regulation of protein ubiquitination                       |                  |                   |       |                   |          |                   |       |      |
| Tissue: Lung=>Thyroid Type: asymmetric |         |                                                                     |                  |                   |       |                   |          |                   |       |      |
| SourceGene: ENSG00000203606.3          |         |                                                                     |                  |                   |       |                   |          |                   |       |      |
| TargetGeneSet:                         |         |                                                                     |                  |                   |       |                   |          |                   |       |      |
| IL12B                                  | ANKRD61 | ZNF683                                                              | KIF21B           | LRRN4             | RPSA  | XCR1              | RSRC1    | HELQ              | RPL34 | RP11 |
| RPL18AP3                               |         | AHCYL2                                                              | RPS20            | RPS6              | RPL35 | NRG3              | RPL13AP5 |                   | MED17 |      |
| BACH1                                  | SOX10   | RPS3AP6                                                             | FTLP14           | CTD               | RPS15 | IL12RB1           | UBA52    | RPL13A            | RPL28 | RPS5 |
|                                        |         | GRAP2                                                               | MAGEE2           |                   |       |                   |          |                   |       |      |
| GOBPID                                 | Pvalue  | OddsRatio                                                           | ExpCount         | Count             | Size  | Term              |          |                   |       |      |
| GO:0006415                             |         | 1.07543866020772e-16                                                | 126.507936507937 |                   |       | 0.151131409591032 |          |                   |       |      |
| 10                                     | 91      | translational termination                                           |                  |                   |       |                   |          |                   |       |      |
| GO:0006414                             |         | 4.76781576616223e-16                                                | 107.759398496241 |                   |       | 0.17438239568196  |          |                   |       |      |
| 10                                     | 105     | translational elongation                                            |                  |                   |       |                   |          |                   |       |      |
| GO:0006614                             |         | 4.76781576616223e-16                                                | 107.759398496241 |                   |       | 0.17438239568196  |          |                   |       |      |
| 10                                     | 105     | SRP-dependent cotranslational protein targeting to membrane         |                  |                   |       |                   |          |                   |       |      |
| GO:0006613                             |         | 5.25979868331653e-16                                                | 106.629464285714 |                   |       | 0.17604318040274  |          |                   |       |      |
| 10                                     | 106     | cotranslational protein targeting to membrane                       |                  |                   |       |                   |          |                   |       |      |
| GO:0045047                             |         | 5.25979868331653e-16                                                | 106.629464285714 |                   |       | 0.17604318040274  |          |                   |       |      |
| 10                                     | 106     | protein targeting to ER                                             |                  |                   |       |                   |          |                   |       |      |
| GO:0072599                             |         | 5.25979868331653e-16                                                | 106.629464285714 |                   |       | 0.17604318040274  |          |                   |       |      |
| 10                                     | 106     | establishment of protein localization to endoplasmic reticulum      |                  |                   |       |                   |          |                   |       |      |
| GO:0070972                             |         | 1.5921890154812e-15                                                 | 94.7023809523809 |                   |       | 0.195972597052107 |          |                   |       |      |
| 10                                     | 118     | protein localization to endoplasmic reticulum                       |                  |                   |       |                   |          |                   |       |      |
| GO:0000184                             |         | 1.73672009496678e-15                                                | 93.826998689384  | 0.197633381772888 |       |                   |          |                   | 10    |      |
| 119                                    |         | nuclear-transcribed mRNA catabolic process, nonsense-mediated decay |                  |                   |       |                   |          |                   |       |      |
| GO:0019080                             |         | 1.98720990239267e-14                                                | 72.370820668693  | 0.250778492837866 |       |                   |          |                   | 10    |      |
| 151                                    |         | viral genome expression                                             |                  |                   |       |                   |          |                   |       |      |
| GO:0019083                             |         | 1.98720990239267e-14                                                | 72.370820668693  | 0.250778492837866 |       |                   |          |                   | 10    |      |
| 151                                    |         | viral transcription                                                 |                  |                   |       |                   |          |                   |       |      |
| GO:0006413                             |         | 2.12526461752503e-14                                                | 71.8561368209256 |                   |       | 0.252439277558646 |          |                   |       |      |
| 10                                     | 152     | translational initiation                                            |                  |                   |       |                   |          |                   |       |      |
| GO:0006612                             |         | 2.27186441596622e-14                                                | 71.3486513486513 |                   |       | 0.254100062279427 |          |                   |       |      |
| 10                                     | 153     | protein targeting to membrane                                       |                  |                   |       |                   |          |                   |       |      |
| GO:0043624                             |         | 2.27186441596622e-14                                                | 71.3486513486513 |                   |       | 0.254100062279427 |          |                   |       |      |
| 10                                     | 153     | cellular protein complex disassembly                                |                  |                   |       |                   |          |                   |       |      |
| GO:0043241                             |         | 3.15009360763803e-14                                                | 68.9140926640927 |                   |       | 0.26240398588333  |          |                   |       |      |
| 10                                     | 158     | protein complex disassembly                                         |                  |                   |       |                   |          |                   |       |      |
| GO:0000956                             |         | 6.23373642231738e-14                                                | 64.0970350404313 |                   |       | 0.280672617811916 |          |                   |       |      |
| 10                                     | 169     | nuclear-transcribed mRNA catabolic process                          |                  |                   |       |                   |          |                   |       |      |
| GO:0034623                             |         | 8.37322751028232e-14                                                | 62.1210801393728 |                   |       | 0.288976541415819 |          |                   |       |      |
| 10                                     | 174     | cellular macromolecular complex disassembly                         |                  |                   |       |                   |          |                   |       |      |
| GO:0006402                             |         | 1.05359344762146e-13                                                | 60.625           | 0.295619680298941 |       |                   |          | 10                | 178   |      |



STable4\_20PerPair

| GO ID                                  | Count                | Term                                                       | Count            | Size                | Term              |                                                                     |         |        |
|----------------------------------------|----------------------|------------------------------------------------------------|------------------|---------------------|-------------------|---------------------------------------------------------------------|---------|--------|
| GO:0032984                             | 1.11494341089671e-13 | mRNA catabolic process                                     | 60.262045646661  | 0.297280465019722   | 10                |                                                                     |         |        |
| GO:0072594                             | 4.16097052637557e-13 | macromolecular complex disassembly                         | 52.4042709867452 | 0.338800083039236   | 10                |                                                                     |         |        |
| GO:0006401                             | 4.37045607501466e-13 | establishment of protein localization to organelle         | 52.1318681318681 | 0.340460867760017   | 10                |                                                                     |         |        |
| GO:0019058                             | 1.44573429335072e-12 | RNA catabolic process                                      | 45.9146735617324 | 0.383641270500311   | 10                |                                                                     |         |        |
| GO:0022415                             | 4.70042883773067e-12 | viral infectious cycle                                     | 40.5057142857143 | 0.431804027402948   | 10                |                                                                     |         |        |
| GO:0071845                             | 1.12918495204337e-11 | viral reproductive process                                 | 36.8952033368092 | 0.471662860701682   | 10                |                                                                     |         |        |
| GO:0022411                             | 1.29696529821864e-11 | cellular component disassembly at cellular level           | 36.3540596094553 | 0.478305999584804   | 10                |                                                                     |         |        |
| GO:0033365                             | 6.99418000080748e-11 | cellular component disassembly                             | 25.5769230769231 | 0.785551172929209   | 11                |                                                                     |         |        |
| GO:0006605                             | 7.15427705087035e-11 | protein localization to organelle                          | 25.5198537963117 | 0.78721195764999    | 11                |                                                                     |         |        |
| GO:0016032                             | 1.05208683112948e-09 | protein targeting                                          | 22.6530612244898 | 0.749013909072037   | 10                |                                                                     |         |        |
| GO:0042274                             | 3.23105168313163e-06 | viral reproduction                                         | 137.257142857143 | 0.0298941249740502  | 3                 |                                                                     |         |        |
| GO:0072540                             | 1.58285995353423e-05 | ribosomal small subunit biogenesis                         | 655.681818181818 | 0.00664313888312228 | 2                 |                                                                     |         |        |
| GO:2000328                             | 1.58285995353423e-05 | T-helper 17 cell lineage commitment                        | 655.681818181818 | 0.00664313888312228 | 2                 |                                                                     |         |        |
| GO:2000330                             | 1.58285995353423e-05 | regulation of T-helper 17 cell lineage commitment          | 655.681818181818 | 0.00664313888312228 | 2                 |                                                                     |         |        |
|                                        |                      | positive regulation of T-helper 17 cell lineage commitment |                  |                     | 2                 |                                                                     |         |        |
| Tissue: Thyroid=>Lung Type: asymmetric |                      |                                                            |                  |                     |                   |                                                                     |         |        |
| SourceGene: EXOC6B(ENSG00000144036.9)  |                      |                                                            |                  |                     |                   |                                                                     |         |        |
| TargetGeneSet:                         | RPL22                | PIK3CD                                                     | CLCNKB           | RP1                 | RPL11             | NIPAL3                                                              | RPS8    | S100A3 |
| ARHGAP30                               | DUSP12               | RGS18                                                      | RPS7             | COMMD1              | COA5              | RPL31                                                               | RPL37A  | GPBAR1 |
| DDX11                                  | RPL32                | LSM3                                                       | RPL14            | CCR2                | C3orf27           | RPL35A                                                              | MYL5    | HTT    |
| RPL34                                  | TLR2                 | RPL37                                                      | CTD              | PLK2                | ERCC8             | CDC23                                                               | DOCK2   | RUFY1  |
| HNRNPC                                 | MEA1                 | IGF2R                                                      | LINC00473        | AOAH                | SBDS              | MAGI2-AS3                                                           |         | PON2   |
| IMPDH1                                 | RP11                 | SPIN1                                                      | C9orf3           | BAAT                | EDF1              | PIK3AP1                                                             | FAM204A | RPLP2  |
| RPS13                                  | SAA1                 | DEPDC7                                                     | PTPRJ            | FAU                 | SIPA1             | ARAP1-AS2                                                           |         | ATP5L  |
| C3AR1                                  | B4GALNT1             |                                                            | APAF1            | GLT8D2              | PSPC1             | RPL3P4                                                              | AQP9    | CSK    |
| GNA15                                  | EMR2                 | POU2F2                                                     | RPL18            | SIGLEC5             | FPR2              | ZNF813                                                              | LILRB4  | SIRPG  |
| RP4                                    | SLCO4A1              | SH3BP1                                                     | PPARA            | AFF2                |                   |                                                                     |         | CDS2   |
| GOBPID                                 | Pvalue               | OddsRatio                                                  | ExpCount         | Count               | Size              | Term                                                                |         |        |
| GO:0006415                             | 1.22551557183846e-20 | 1.22551557183846e-20                                       | 50.8444444444444 | 50.8444444444444    | 0.478582797038267 | translational termination                                           |         |        |
| GO:0006414                             | 1.39415830001593e-19 | 1.39415830001593e-19                                       | 42.8044943820225 | 42.8044943820225    | 0.552210919659539 | translational elongation                                            |         |        |
| GO:0006614                             | 1.39415830001593e-19 | 1.39415830001593e-19                                       | 42.8044943820225 | 42.8044943820225    | 0.552210919659539 | SRP-dependent cotranslational protein targeting to membrane         |         |        |
| GO:0006613                             | 1.63555547543825e-19 | 1.63555547543825e-19                                       | 42.3259259259259 | 42.3259259259259    | 0.557470071275344 | cotranslational protein targeting to membrane                       |         |        |
| GO:0045047                             | 1.63555547543825e-19 | 1.63555547543825e-19                                       | 42.3259259259259 | 42.3259259259259    | 0.557470071275344 | protein targeting to ER                                             |         |        |
| GO:0072599                             | 1.63555547543825e-19 | 1.63555547543825e-19                                       | 42.3259259259259 | 42.3259259259259    | 0.557470071275344 | establishment of protein localization to endoplasmic reticulum      |         |        |
| GO:0070972                             | 9.85193947891127e-19 | 9.85193947891127e-19                                       | 37.3150326797386 | 37.3150326797386    | 0.620579890665006 | protein localization to endoplasmic reticulum                       |         |        |
| GO:0000184                             | 1.13375747411844e-18 | 1.13375747411844e-18                                       | 36.9501618122977 | 36.9501618122977    | 0.625839042280811 | nuclear-transcribed mRNA catabolic process, nonsense-mediated decay |         |        |
| GO:0043624                             | 2.38731745532775e-18 | 2.38731745532775e-18                                       | 30.1673728813559 | 30.1673728813559    | 0.804650197218186 | cellular protein complex disassembly                                |         |        |
| GO:0043241                             | 4.16889475989191e-18 | 4.16889475989191e-18                                       | 29.0873903113355 | 29.0873903113355    | 0.830945955297211 | protein complex disassembly                                         |         |        |
| GO:0000956                             | 1.33170191905417e-17 | 1.33170191905417e-17                                       | 26.9615298840321 | 26.9615298840321    | 0.888796623071068 |                                                                     |         |        |

Stable4\_20PerPair

|                                        |           |                                                    |                  |                   |        |           |                    |                     |
|----------------------------------------|-----------|----------------------------------------------------|------------------|-------------------|--------|-----------|--------------------|---------------------|
| 17                                     | 169       | nuclear-transcribed mRNA catabolic process         |                  |                   |        |           |                    |                     |
| GO:0034623                             |           | 2.19755195044071e-17                               | 26.0937061427183 |                   |        |           | 0.915092381150093  |                     |
| 17                                     | 174       | cellular macromolecular complex disassembly        |                  |                   |        |           |                    |                     |
| GO:0006402                             |           | 3.24419208790125e-17                               | 25.4382566585956 |                   |        |           | 0.936128987613314  |                     |
| 17                                     | 178       | mRNA catabolic process                             |                  |                   |        |           |                    |                     |
| GO:0032984                             |           | 3.57067420166205e-17                               | 25.2794517681523 |                   |        |           | 0.941388139229119  |                     |
| 17                                     | 179       | macromolecular complex disassembly                 |                  |                   |        |           |                    |                     |
| GO:0019080                             |           | 5.69250548323201e-17                               | 28.1283950617284 |                   |        |           | 0.794131893986575  |                     |
| 16                                     | 151       | viral genome expression                            |                  |                   |        |           |                    |                     |
| GO:0019083                             |           | 5.69250548323201e-17                               | 28.1283950617284 |                   |        |           | 0.794131893986575  |                     |
| 16                                     | 151       | viral transcription                                |                  |                   |        |           |                    |                     |
| GO:0006413                             |           | 6.33714914455192e-17                               | 27.9196078431373 |                   |        |           | 0.799391045602381  |                     |
| 16                                     | 152       | translational initiation                           |                  |                   |        |           |                    |                     |
| GO:0006612                             |           | 7.04937307436429e-17                               | 27.7138686131387 |                   |        |           | 0.804650197218186  |                     |
| 16                                     | 153       | protein targeting to membrane                      |                  |                   |        |           |                    |                     |
| GO:0006401                             |           | 3.58430859198859e-16                               | 21.7435088351965 |                   |        |           | 1.07812608124005   |                     |
| 17                                     | 205       | RNA catabolic process                              |                  |                   |        |           |                    |                     |
| GO:0072594                             |           | 7.08232069808961e-15                               | 20.1234042553191 |                   |        |           | 1.07286692962425   |                     |
| 16                                     | 204       | establishment of protein localization to organelle |                  |                   |        |           |                    |                     |
| GO:0019058                             |           | 4.99815591437332e-14                               | 17.5627906976744 |                   |        |           | 1.21486402325099   |                     |
| 16                                     | 231       | viral infectious cycle                             |                  |                   |        |           |                    |                     |
| GO:0071845                             |           | 8.14201157117466e-14                               | 15.2247825810957 |                   |        |           | 1.49359905888866   |                     |
| 17                                     | 284       | cellular component disassembly at cellular level   |                  |                   |        |           |                    |                     |
| GO:0022411                             |           | 1.02371903515935e-13                               | 14.9958096191131 |                   |        |           | 1.51463566535188   |                     |
| 17                                     | 288       | cellular component disassembly                     |                  |                   |        |           |                    |                     |
| GO:0022415                             |           | 3.13993713003726e-13                               | 15.4437158469945 |                   |        |           | 1.36737942010933   |                     |
| 16                                     | 260       | viral reproductive process                         |                  |                   |        |           |                    |                     |
| GO:0016032                             |           | 1.33164525692891e-11                               | 9.9926734092538  | 2.37187737872812  |        |           | 18                 |                     |
| 451                                    |           | viral reproduction                                 |                  |                   |        |           |                    |                     |
| GO:0033365                             |           | 2.92686818870582e-11                               | 9.49450549450549 |                   |        |           | 2.48757871427583   |                     |
| 18                                     | 473       | protein localization to organelle                  |                  |                   |        |           |                    |                     |
| GO:0006605                             |           | 3.03052855217993e-11                               | 9.47300362976407 |                   |        |           | 2.49283786589163   |                     |
| 18                                     | 474       | protein targeting                                  |                  |                   |        |           |                    |                     |
| GO:0042273                             |           | 3.38648218066051e-07                               | 99.7708333333333 |                   |        |           | 0.0631098193896616 |                     |
| 4                                      | 12        | ribosomal large subunit biogenesis                 |                  |                   |        |           |                    |                     |
| GO:0050900                             |           | 4.6320715091572e-06                                | 8.18881883685023 |                   |        |           | 1.26745553940904   |                     |
| 9                                      | 241       | leukocyte migration                                |                  |                   |        |           |                    |                     |
| GO:0042254                             |           | 1.29733160687055e-05                               | 10.1685037762809 |                   |        |           | 0.783613590754965  |                     |
| 7                                      | 149       | ribosome biogenesis                                |                  |                   |        |           |                    |                     |
| GO:0006364                             |           | 1.74693870538412e-05                               | 12.4871720116618 |                   |        |           | 0.546951768043734  |                     |
| 6                                      | 104       | rRNA processing                                    |                  |                   |        |           |                    |                     |
| Tissue: Lung=>Thyroid Type: asymmetric |           |                                                    |                  |                   |        |           |                    |                     |
| SourceGene: MEIS3(ENSG00000105419.10)  |           |                                                    |                  |                   |        |           |                    |                     |
| TargetGeneSet:                         |           |                                                    |                  |                   |        |           |                    |                     |
| TRIM54                                 | C2orf68   | IGKV4-1                                            | IGKV1-5          | IGKV3-20          | RP4    | RP11      | CD84               | SLAMF1 FCGR2A       |
| TEX264                                 | CD86      | CTD                                                | CD180            | SMN2              | DOCK2  | MIR590    | NCF1               | CLASP1 WIPF1 BTD    |
| TNFSF8                                 | ZDHC12    | FAM78A                                             | MS4A7            | NCKAP1L           | RP13   | LINC00543 |                    | PIK3CG TMEM209 DOK2 |
| TRAV12-3                               |           | IGHA2                                              | IGHA1            | IGHV3-23          |        | IGHV1-69  |                    | RPL21P110           |
| PLCB2                                  | CD68      | VAV1                                               | MYO1F            | TYROBP            | MAP4K1 | CEACAMP3  |                    | IGHV3-74            |
| LAIR1                                  | C21orf128 |                                                    | ITGB2            | IGLV3-1           | IGLL5  | IGLC1     | NCF4               | CD37 SIGLEC9 FPR3   |
| VSIG4                                  | CXCR3     | ZDHC15                                             | SASH3            |                   |        |           |                    | SH3BP1 APOBEC3F     |
| GOBPID                                 | Pvalue    | OddsRatio                                          | ExpCount         | Count             | Size   | Term      |                    |                     |
| GO:0002252                             |           | 2.87071538339873e-17                               | 25.4311594202899 |                   |        |           |                    | 1.20199294166494    |
| 18                                     | 386       | immune effector process                            |                  |                   |        |           |                    |                     |
| GO:0006956                             |           | 2.45869768457851e-13                               | 66.4444444444444 |                   |        |           |                    | 0.196180195142205   |
| 9                                      | 63        | complement activation                              |                  |                   |        |           |                    |                     |
| GO:0002443                             |           | 1.2928520344683e-12                                | 25.96071265418   | 0.657047955158813 |        |           |                    | 12                  |
| 211                                    |           | leukocyte mediated immunity                        |                  |                   |        |           |                    |                     |
| GO:0006958                             |           | 2.23355898765962e-12                               | 73.945945945946  | 0.155698567573178 |        |           |                    | 8                   |
| 50                                     |           | complement activation, classical pathway           |                  |                   |        |           |                    |                     |
| GO:0072376                             |           | 2.91685239485629e-12                               | 49.0856164383562 |                   |        |           |                    | 0.255345650820012   |
| 9                                      | 82        | protein activation cascade                         |                  |                   |        |           |                    |                     |
| GO:0006959                             |           | 3.14566521722145e-12                               | 36.4642857142857 |                   |        |           |                    | 0.379904504878555   |

Stable4\_20PerPair

|            |     |                                                                                                                           |                  |                   |                    |    |
|------------|-----|---------------------------------------------------------------------------------------------------------------------------|------------------|-------------------|--------------------|----|
| 10         | 122 | humoral immune response                                                                                                   |                  |                   |                    |    |
| GO:0002455 |     | 2.02913909719507e-11                                                                                                      | 54.4295874822191 |                   | 0.202408137845132  |    |
| 8          | 65  | humoral immune response mediated by circulating immunoglobulin                                                            |                  |                   |                    |    |
| GO:0002250 |     | 3.90545676405975e-10                                                                                                      | 21.6079027355623 |                   | 0.616566327589786  |    |
| 10         | 198 | adaptive immune response                                                                                                  |                  |                   |                    |    |
| GO:0050778 |     | 7.41040877791082e-10                                                                                                      | 14.5185950413223 |                   | 1.13348557193274   |    |
| 12         | 364 | positive regulation of immune response                                                                                    |                  |                   |                    |    |
| GO:0002253 |     | 1.34484561432163e-09                                                                                                      | 15.859681372549  | 0.931077434087606 |                    | 11 |
| 299        |     | activation of immune response                                                                                             |                  |                   |                    |    |
| GO:0016064 |     | 1.59786108920534e-09                                                                                                      | 30.0246654421412 |                   | 0.345650820012456  |    |
| 8          | 111 | immunoglobulin mediated immune response                                                                                   |                  |                   |                    |    |
| GO:0002449 |     | 1.83702363129305e-09                                                                                                      | 22.5443037974684 |                   | 0.520033215694416  |    |
| 9          | 167 | lymphocyte mediated immunity                                                                                              |                  |                   |                    |    |
| GO:0019724 |     | 1.9780230461189e-09                                                                                                       | 29.1687914329424 |                   | 0.354992734066847  |    |
| 8          | 114 | B cell mediated immunity                                                                                                  |                  |                   |                    |    |
| GO:0002460 |     | 3.73693396883311e-09                                                                                                      | 20.6889534883721 |                   | 0.563628814614906  |    |
| 9          | 181 | adaptive immune response based on somatic recombination of immune receptors built from immunoglobulin superfamily domains |                  |                   |                    |    |
| GO:0046631 |     | 5.3171472034183e-06                                                                                                       | 23.2613636363636 |                   | 0.255345650820012  |    |
| 5          | 82  | alpha-beta T cell activation                                                                                              |                  |                   |                    |    |
| GO:0042110 |     | 5.46578104487067e-06                                                                                                      | 9.79925262883462 |                   | 0.993356861116878  |    |
| 8          | 319 | T cell activation                                                                                                         |                  |                   |                    |    |
| GO:0046649 |     | 6.08926902884319e-06                                                                                                      | 8.24410377358491 |                   | 1.34834959518372   |    |
| 9          | 433 | lymphocyte activation                                                                                                     |                  |                   |                    |    |
| GO:0043372 |     | 1.86112825578915e-05                                                                                                      | 73.4285714285714 |                   | 0.0529375129748806 |    |
| 3          | 17  | positive regulation of CD4-positive, alpha-beta T cell differentiation                                                    |                  |                   |                    |    |

Tissue: Lung=>Thyroid Type: asymmetric  
SourceGene: MORC2(ENSG00000133422.7)

|                |          |           |          |           |          |          |           |           |
|----------------|----------|-----------|----------|-----------|----------|----------|-----------|-----------|
| TargetGeneSet: | RP4      | C1orf159  | UBE2J2   | CEP104    | DNAJC16  | HSPB7    | RP11      | EYA3      |
| KPNA7          | TAL1     | RP1       | NFIA     | SLC35A3   | GOLPH3L  | UBQLN4   | CCT3      | POGK      |
| TMEM81         | RBBP5    | LINC00467 | SMC6     | TTC32     | UBXN2A   | PREB     | SLC5A6    | EIF2B4    |
| ERLEC1         | PNPT1    | CCT4      | SPR      | CCT7      | AUP1     | RMND5A   | MRPS5     | ASTL      |
| TFPI           | HSPD1    | HDLBP     | NKIRAS1  | ABHD5     | GLYCTK   | NEK4     | PPP4R2    | PTPLB     |
| SLC25A36       |          | ABCF3     | CEP19    | LRCH3     | ZNF141   | CLOCK    | EIF4E     | FAM105B   |
| DNAJC21        | CTD      | IP011     | ZFYVE16  | SHROOM1   | CSNK1A1  | TSPAN17  | TRIM27    | HCG20     |
| RING1          | TAF8     | MT01      | PGM3     | PEX7      | NHSL1    | AQP1     | PURB      | YWHAG     |
| AGFG2          | CTA      | C7orf53   | CADPS2   | SMO       | NFE2L1   | TRBV7-3  | ABCF2     | DNAJB6    |
| NEIL2          | POLR3D   | NKX3-1    | PPP2R2A  | LSM12P1   | KAT6A    | C8orf40  | ZHX1      | IFNK      |
| TESK1          | DCAF10   | C9orf40   | SUSD3    | NIPSNAP3B | NOXA1    | FBXO18   | TAF3      | BMS1      |
| ZFAND4         | P4HA1    | AP2A2     | RIC3     | ETFA      | MTA2     | C11orf84 | MARK2     | STIP1     |
| RBM14          | C11orf30 |           | DDX10    | C11orf92  | PAFAH1B2 |          | HSPA8     | FKBP4     |
| TULP3          | C12orf33 |           | KIAA1467 |           | REP15    | SLC35E3  | CCT2      | TDG       |
| ATXN2          | C12orf65 |           | RPL22P19 |           | RAN      | PUS1     | GOLGA3    | RPL23AP67 |
| MPHOSPH8       |          | HSPH1     | NHLRC3   | DHRS12    | SUGT1    | A2LD1    | PRMT5-AS1 | PRMT5     |
| ACIN1          | SOCS6    | DHRS7     | AHSA1    | HSP90AA1  |          | GOLGA8IP |           | PPP1R14D  |
| TP53BP1        | AP4E1    | TNFAIP8L3 |          | PIGB      | CSNK1G1  | PEAK1    | DNAJA4    | CARHSP1   |
| SULT1A3        | CD2BP2   | TBC1D10B  |          | DNAJA2    | CCL22    | GFOD2    | MAF       | GAN       |
| KLHDC4         | VPS53    | DLG4      | GIT1     | CCL16     | WIPF2    | LEPREL4  | SRP68     | JMJD6     |
| ADAT3          | SAFB     | ELAVL1    | ZNF562   | CLEC17A   | LIN37    | ZNF781   | MAP3K10   | MIA       |
| MYPOP          | KCNJ14   | ZNF347    | ZNF761   | ZNF814    | ZNF329   | RP3      | KRT18P4   | KRT18P5   |
| TOP3B          | SGSM1    | MORC2     | MID2     |           |          |          |           | CRKL      |

| GOBPID     | Pvalue | OddsRatio                                   | ExpCount         | Count | Size | Term              |
|------------|--------|---------------------------------------------|------------------|-------|------|-------------------|
| GO:0006457 |        | 1.23318444524738e-09                        | 8.17217391304348 |       |      | 2.30184762300187  |
| 16         | 216    | protein folding                             |                  |       |      |                   |
| GO:0006986 |        | 9.67775375886308e-06                        | 7.33293103448276 |       |      | 1.37471455262612  |
| 9          | 129    | response to unfolded protein                |                  |       |      |                   |
| GO:0035966 |        | 1.48379429324467e-05                        | 6.92533260928591 |       |      | 1.44931146633451  |
| 9          | 136    | response to topologically incorrect protein |                  |       |      |                   |
| GO:0006458 |        | 1.61056528419891e-05                        | 12.8396396396396 |       |      | 0.543491799875441 |
| 6          | 51     | 'de novo' protein folding                   |                  |       |      |                   |

Tissue: Lung=>Thyroid Type: asymmetric  
SourceGene: MRS2P2(ENSG00000257802.1)

Stable4\_20PerPair

| TargetGeneSet: | MTND1P23  | MTND2P28             | NOL9                 | SPEN             | RP11              | RP1      |          |                   |                                                                     |
|----------------|-----------|----------------------|----------------------|------------------|-------------------|----------|----------|-------------------|---------------------------------------------------------------------|
| WASF2          | EYA3      | MED18                | PHACTR4              | PFN1P8           | RPRD2             | POGK     | RBBP5    | CICP5             | RN5S78                                                              |
| GPR75          | AAK1      | POLR1A               | RQCD1                | QTRTD1           | ANKRD17           | CTD      | APC      | PHAX              | CTB                                                                 |
| MTND5P11       |           | PCDH1                | GFOD1                | ZBTB9            | TAF8              | MTRNR2L9 |          | URGCP             | ZNF713                                                              |
| ZKSCAN5        | MEPCE     | CBLL1                | ZNF800               | TRIM35           | KIAA1429          |          | KLHL9    | ZFP37             | EXOSC2                                                              |
| PRINS          | LRR37A6P  |                      | AK3P5                | DUPD1            | PFN1P11           | CHRNA10  | MTRNR2L8 |                   | FNBP4                                                               |
| ZBTB3          | MSANTD4   | ZNF202               | CD9                  | ACVRL1           | PRKAB1            | RBM22P2  | ARGLU1   | GOLGA8IP          | TJP1                                                                |
| MGA            | RPL35AP32 |                      | C15orf58             |                  | MAZ               | FTO-IT1  | NFATC3   | SDR42E1           | RNASEK                                                              |
| WIPF2          | IGFBP4    | FEM1A                | ZNF557               | ZNF317           | ZNF562            | ZNF440   | ZNF44    | ZNF429            | LIN37                                                               |
| ZNF565         | ZFP82     | ZNF480               | ZNF765               | ZNF264           | ZNF543            | ZNF17    | ZNF544   | NCOA5             | ADNP                                                                |
| NDUFV3         | NF2       | PRR14L               | ZNF41                | UTP14A           |                   |          |          |                   |                                                                     |
| GOBPID         | Pvalue    | OddsRatio            | ExpCount             | Count            | Size              | Term     |          |                   |                                                                     |
| Tissue:        | Lung=>    | Thyroid              | Type:                | asymmetric       |                   |          |          |                   |                                                                     |
| SourceGene:    | OLA1      | (ENSG00000138430.11) |                      |                  |                   |          |          |                   |                                                                     |
| TargetGeneSet: | RP11      | NCDN                 | CCDC24               | VANGL1           | METTL13           | C1D      | USP39    | RPL31             |                                                                     |
| CCDC74B        | BDP1      | CAB39                | TOP2B                | ZNF860           | XYLB              | ZNF167   | RPL29    | POC1A             | EIF4E3                                                              |
| IFT57          | CNBP      | LRCH3                | LAMTOR3              | ELOVL6           | GTF2F2P1          |          | HINT1    | SKP1              | PEX7                                                                |
| ATP6V1B2       |           | RPS20                | IMPDH1P6             |                  | ZNF618            | ATP6V1G1 |          | THNSL1            | SUFU                                                                |
| C10orf32       |           | C11orf58             |                      | FAM76B           | ZC3H12C           | COPS7A   | HOXC5    | HMGB1             | ITM2B                                                               |
| AKAP5          | RPL4      | C16orf59             |                      | RPL23A           | RPL19             | GPR142   | CBX8     | RPS15             | SIN3B                                                               |
| ZNF536         | SIGLEC7   | LINC00493            |                      | ZFP64            | PPM1F             | CTPS2    | RPS4X    | BEX4              | MIR224                                                              |
| GOBPID         | Pvalue    | OddsRatio            | ExpCount             | Count            | Size              | Term     |          |                   |                                                                     |
| GO:0006415     | 8         | 91                   | 3.21955477760918e-10 | 37.3116248778899 |                   |          |          | 0.283371392983185 |                                                                     |
|                |           |                      |                      |                  |                   |          |          |                   | translational termination                                           |
| GO:0006414     | 8         | 105                  | 1.02297167185496e-09 | 31.8952354416272 |                   |          |          | 0.326966991903675 |                                                                     |
|                |           |                      |                      |                  |                   |          |          |                   | translational elongation                                            |
| GO:0006614     | 8         | 105                  | 1.02297167185496e-09 | 31.8952354416272 |                   |          |          | 0.326966991903675 |                                                                     |
|                |           |                      |                      |                  |                   |          |          |                   | SRP-dependent cotranslational protein targeting to membrane         |
| GO:0006613     | 8         | 106                  | 1.10395183700959e-09 | 31.5675675675676 |                   |          |          | 0.330080963255138 |                                                                     |
|                |           |                      |                      |                  |                   |          |          |                   | cotranslational protein targeting to membrane                       |
| GO:0045047     | 8         | 106                  | 1.10395183700959e-09 | 31.5675675675676 |                   |          |          | 0.330080963255138 |                                                                     |
|                |           |                      |                      |                  |                   |          |          |                   | protein targeting to ER                                             |
| GO:0072599     | 8         | 106                  | 1.10395183700959e-09 | 31.5675675675676 |                   |          |          | 0.330080963255138 |                                                                     |
|                |           |                      |                      |                  |                   |          |          |                   | establishment of protein localization to endoplasmic reticulum      |
| GO:0070972     | 8         | 118                  | 2.60527694582146e-09 | 28.1002457002457 |                   |          |          | 0.367448619472701 |                                                                     |
|                |           |                      |                      |                  |                   |          |          |                   | protein localization to endoplasmic reticulum                       |
| GO:0000184     | 119       |                      | 2.78666132651158e-09 | 27.845142439737  | 0.370562590824164 |          |          | 8                 |                                                                     |
|                |           |                      |                      |                  |                   |          |          |                   | nuclear-transcribed mRNA catabolic process, nonsense-mediated decay |
| GO:0072594     | 9         | 204                  | 1.06541617984882e-08 | 18.2192307692308 |                   |          |          | 0.635250155698568 |                                                                     |
|                |           |                      |                      |                  |                   |          |          |                   | establishment of protein localization to organelle                  |
| GO:0019080     | 8         | 151                  | 1.83321836171405e-08 | 21.5656775656776 |                   |          |          | 0.470209674070999 |                                                                     |
|                |           |                      |                      |                  |                   |          |          |                   | viral genome expression                                             |
| GO:0019083     | 8         | 151                  | 1.83321836171405e-08 | 21.5656775656776 |                   |          |          | 0.470209674070999 |                                                                     |
|                |           |                      |                      |                  |                   |          |          |                   | viral transcription                                                 |
| GO:0006413     | 8         | 152                  | 1.93063668823183e-08 | 21.4144144144144 |                   |          |          | 0.473323645422462 |                                                                     |
|                |           |                      |                      |                  |                   |          |          |                   | translational initiation                                            |
| GO:0006612     | 8         | 153                  | 2.03249372007879e-08 | 21.2652376514445 |                   |          |          | 0.476437616773926 |                                                                     |
|                |           |                      |                      |                  |                   |          |          |                   | protein targeting to membrane                                       |
| GO:0043624     | 8         | 153                  | 2.03249372007879e-08 | 21.2652376514445 |                   |          |          | 0.476437616773926 |                                                                     |
|                |           |                      |                      |                  |                   |          |          |                   | cellular protein complex disassembly                                |
| GO:0043241     | 8         | 158                  | 2.61444317343914e-08 | 20.5491891891892 |                   |          |          | 0.492007473531244 |                                                                     |
|                |           |                      |                      |                  |                   |          |          |                   | protein complex disassembly                                         |
| GO:0000956     | 8         | 169                  | 4.42016157169263e-08 | 19.1304347826087 |                   |          |          | 0.526261158397343 |                                                                     |
|                |           |                      |                      |                  |                   |          |          |                   | nuclear-transcribed mRNA catabolic process                          |
| GO:0034623     | 8         | 174                  | 5.54487334207817e-08 | 18.5477043308369 |                   |          |          | 0.541831015154661 |                                                                     |
|                |           |                      |                      |                  |                   |          |          |                   | cellular macromolecular complex disassembly                         |
| GO:0006402     | 178       |                      | 6.6144265321733e-08  | 18.106200317965  | 0.554286900560515 |          |          | 8                 |                                                                     |
|                |           |                      |                      |                  |                   |          |          |                   | mRNA catabolic process                                              |
| GO:0032984     | 8         | 179                  | 6.90801909820277e-08 | 17.9990516832622 |                   |          |          | 0.557400871911978 |                                                                     |
|                |           |                      |                      |                  |                   |          |          |                   | macromolecular complex disassembly                                  |
| GO:0006605     | 11        | 474                  | 1.55855312098603e-07 | 9.74291703722526 |                   |          |          | 1.47602242059373  |                                                                     |
|                |           |                      |                      |                  |                   |          |          |                   | protein targeting                                                   |
| GO:0071845     |           |                      | 1.83687142817769e-07 | 12.8463636363636 |                   |          |          | 0.884367863815653 |                                                                     |

Stable4\_20PerPair

|                                             |          |                                                                      |                  |           |        |                   |          |                   |             |
|---------------------------------------------|----------|----------------------------------------------------------------------|------------------|-----------|--------|-------------------|----------|-------------------|-------------|
| 9                                           | 284      | cellular component disassembly at cellular level                     |                  |           |        |                   |          |                   |             |
| GO:0006401                                  |          | 1.9656774814511e-07                                                  | 15.5950061736864 |           |        |                   |          | 0.638364127050031 |             |
| 8                                           | 205      | RNA catabolic process                                                |                  |           |        |                   |          |                   |             |
| GO:0022411                                  |          | 2.06815135429612e-07                                                 | 12.6586021505376 |           |        |                   |          | 0.896823749221507 |             |
| 9                                           | 288      | cellular component disassembly                                       |                  |           |        |                   |          |                   |             |
| GO:0019058                                  |          | 4.88983744313021e-07                                                 | 13.7515452672403 |           |        |                   |          | 0.719327382188084 |             |
| 8                                           | 231      | viral infectious cycle                                               |                  |           |        |                   |          |                   |             |
| GO:0016032                                  |          | 9.5001796262223e-07                                                  | 9.04761904761905 |           |        |                   |          | 1.40440107951007  |             |
| 10                                          | 451      | viral reproduction                                                   |                  |           |        |                   |          |                   |             |
| GO:0022415                                  |          | 1.19467009618048e-06                                                 | 12.1441441441441 |           |        |                   |          | 0.809632551380527 |             |
| 8                                           | 260      | viral reproductive process                                           |                  |           |        |                   |          |                   |             |
| GO:0033365                                  |          | 1.46260855257869e-06                                                 | 8.60413452638075 |           |        |                   |          | 1.47290844924227  |             |
| 10                                          | 473      | protein localization to organelle                                    |                  |           |        |                   |          |                   |             |
| Tissue: Lung=>Thyroid Type: asymmetric      |          |                                                                      |                  |           |        |                   |          |                   |             |
| SourceGene: PRKCDBP(ENSG00000170955.9)      |          |                                                                      |                  |           |        |                   |          |                   |             |
| TargetGeneSet:                              | CEP104   | RP4                                                                  | RP1              | EYA3      | PEF1   | TAL1              | RP11     | INTS3             |             |
| UBQLN4                                      | CCT3     | RBBP5                                                                | URB2             | MFSD2B    | SLC5A6 | PCBP1-AS1         | HTRA2    | LMAN2L            |             |
| ANKRD39                                     | AMMECR1L |                                                                      | RBM43            | CYP8B1    | PHF7   | NEK4              | SLC25A36 | KIAA0226          |             |
| IDUA                                        | FAM105B  | GABBR1                                                               | C6orf25          | DAXX      | USP42  | METTL2A           | DNAJB6   | NEIL2             | CHMP7       |
| KAT6A                                       | DNAJA1   | TBC1D13                                                              | FBXO18           | CEP57L1P1 |        | P4HA1             | AP2A2    | SLC35C1           | C11orf84    |
| STIP1                                       | KLC2     | RCE1                                                                 | C11orf30         |           | C2CD2L | HSPA8             | SCN3B    | FKBP4             | REP15       |
| GCN1L1                                      | DYNLL1   | C12orf65                                                             |                  | MPHOSPH8  |        | HSPH1             | RFC3     | PRMT5             | SOCS6       |
| ACOT2                                       | DNAL1    | AHSA1                                                                | HSP90AA1         |           | BUB1B  | PPP1R14D          |          | PIGB              | CTD         |
| SH2D7                                       | DNAJA4   | PRC1                                                                 | TELO2            | USP31     | MAZ    | C17orf39          |          | C17orf51          | GIT1        |
| PIP4K2B                                     | WIPF2    | KAT2A                                                                | PSME3            | UBE2Z     | CDR2L  | QRICH2            | JMJD6    | CSNK1D            | ELOF1       |
| DNAJB1                                      | C19orf60 |                                                                      | HIPK4            | MIA       | IRGQ   | SMG9              | NOVA2    | ZNF329            | ZSCAN22 RP3 |
| LINC00478                                   |          | SGSM1                                                                | NF2              | PRR14L    | LARGE  | FAM123B           | ACRC     |                   |             |
| GOBPID                                      | Pvalue   | OddsRatio                                                            | ExpCount         | Count     | Size   | Term              |          |                   |             |
| GO:0006457                                  |          | 1.01918576706817e-08                                                 | 12.2661683713611 |           |        | 1.09113556155283  |          |                   |             |
| 11                                          | 216      | protein folding                                                      |                  |           |        |                   |          |                   |             |
| Tissue: Lung=>Thyroid Type: asymmetric      |          |                                                                      |                  |           |        |                   |          |                   |             |
| SourceGene: RP11-114F3.5(ENSG00000255566.1) |          |                                                                      |                  |           |        |                   |          |                   |             |
| TargetGeneSet:                              | DNAJC16  | KIAA0090                                                             |                  | TXLNA     | SF3A3  | EBNA1BP2          | RP11     | CTH               |             |
| TMEM56                                      | RLIMP2   | PIAS3                                                                | BCL9             | PSMD4     | ADAR   | FLAD1             | FAM5B    | NAV1              | AKT3        |
| POU3F3                                      | PSMD14   | TYW5                                                                 | RQCD1            | PSMD1     | QTRTD1 | RUVBL1            | ALG3     | PSMD2             | PPAT TET2   |
| XBP1P1                                      | GALNT10  | PRR3                                                                 | TUBB             | VAR5      | ESR1   | LINC00574         |          | FAM71F1           | SLC35B4     |
| TAS2R5                                      | TRIM35   | OSGIN2                                                               | NCBP1            | ANKS6     | NGB    | C10orf140         |          | C11orf42          |             |
| MRPL17                                      | CAPRIN1  | SLC1A2                                                               | GANAB            | IL18BP    | ASUN   | METTL1            | CAND1    | POLR3B            | PSME2       |
| TUBGCP4                                     | SRL      | HSD3B7                                                               | CIAPIN1          | TSR1      | PIGW   | PSMD3             | PSME3    | FAM100B           | PIK3R2      |
| RAB3A                                       | SOX12    | NOP56                                                                | TRMT6            | NCOA5     | SEPT3  | TTC3P1            | UTP14A   |                   |             |
| GOBPID                                      | Pvalue   | OddsRatio                                                            | ExpCount         | Count     | Size   | Term              |          |                   |             |
| GO:0006521                                  |          | 4.22002709693428e-09                                                 | 36.4992727272727 |           |        | 0.244550550134939 |          |                   |             |
| 7                                           | 57       | regulation of cellular amino acid metabolic process                  |                  |           |        |                   |          |                   |             |
| GO:0031397                                  |          | 5.0530653684476e-09                                                  | 25.2292768959436 |           |        | 0.394713168638849 |          |                   |             |
| 8                                           | 92       | negative regulation of protein ubiquitination                        |                  |           |        |                   |          |                   |             |
| GO:0006977                                  |          | 1.20627742697857e-08                                                 | 30.9121725731895 |           |        | 0.283163794893087 |          |                   |             |
| 7                                           | 66       | DNA damage response, signal transduction by p53 class mediator       |                  |           |        |                   |          |                   |             |
| resulting in cell cycle arrest              |          |                                                                      |                  |           |        |                   |          |                   |             |
| GO:0072413                                  |          | 1.20627742697857e-08                                                 | 30.9121725731895 |           |        | 0.283163794893087 |          |                   |             |
| 7                                           | 66       | signal transduction involved in mitotic cell cycle checkpoint        |                  |           |        |                   |          |                   |             |
| GO:0072431                                  |          | 1.20627742697857e-08                                                 | 30.9121725731895 |           |        | 0.283163794893087 |          |                   |             |
| 7                                           | 66       | signal transduction involved in mitotic cell cycle G1/S transition   |                  |           |        |                   |          |                   |             |
| DNA damage checkpoint                       |          |                                                                      |                  |           |        |                   |          |                   |             |
| GO:0072474                                  |          | 1.20627742697857e-08                                                 | 30.9121725731895 |           |        | 0.283163794893087 |          |                   |             |
| 7                                           | 66       | signal transduction involved in mitotic cell cycle G1/S checkpoint   |                  |           |        |                   |          |                   |             |
| GO:0051436                                  |          | 1.342519859634e-08                                                   | 30.3948484848485 |           |        | 0.28745415542177  |          |                   |             |
| 7                                           | 67       | negative regulation of ubiquitin-protein ligase activity involved in |                  |           |        |                   |          |                   |             |
| mitotic cell cycle                          |          |                                                                      |                  |           |        |                   |          |                   |             |
| GO:0072401                                  |          | 1.342519859634e-08                                                   | 30.3948484848485 |           |        | 0.28745415542177  |          |                   |             |
| 7                                           | 67       | signal transduction involved in DNA integrity checkpoint             |                  |           |        |                   |          |                   |             |
| GO:0072404                                  |          | 1.342519859634e-08                                                   | 30.3948484848485 |           |        | 0.28745415542177  |          |                   |             |
| 7                                           | 67       | signal transduction involved in G1/S transition checkpoint           |                  |           |        |                   |          |                   |             |
| GO:0072422                                  |          | 1.342519859634e-08                                                   | 30.3948484848485 |           |        | 0.28745415542177  |          |                   |             |

Stable4\_20PerPair

|            |     |                                                                                                 |                  |                   |   |     |
|------------|-----|-------------------------------------------------------------------------------------------------|------------------|-------------------|---|-----|
| 7          | 67  | signal transduction involved in DNA damage checkpoint                                           |                  |                   |   |     |
| GO:0072395 |     | 1.49159099716136e-08                                                                            | 29.8944858420268 | 0.291744515950453 |   |     |
| 7          | 68  | signal transduction involved in cell cycle checkpoint                                           |                  |                   |   |     |
| GO:0033238 |     | 2.23646394635328e-08                                                                            | 28.046993006993  | 0.308905958065186 |   | 7   |
| 72         |     | regulation of cellular amine metabolic process                                                  |                  |                   |   |     |
| GO:0051352 |     | 2.23646394635328e-08                                                                            | 28.046993006993  | 0.308905958065186 |   | 7   |
| 72         |     | negative regulation of ligase activity                                                          |                  |                   |   |     |
| GO:0051437 |     | 2.23646394635328e-08                                                                            | 28.046993006993  | 0.308905958065186 |   | 7   |
| 72         |     | positive regulation of ubiquitin-protein ligase activity involved in mitotic cell cycle         |                  |                   |   |     |
| GO:0051444 |     | 2.23646394635328e-08                                                                            | 28.046993006993  | 0.308905958065186 |   | 7   |
| 72         |     | negative regulation of ubiquitin-protein ligase activity                                        |                  |                   |   |     |
| GO:0031571 |     | 2.46541900927055e-08                                                                            | 27.6201101928375 | 0.313196318593869 |   |     |
| 7          | 73  | mitotic cell cycle G1/S transition DNA damage checkpoint                                        |                  |                   |   |     |
| GO:0002479 |     | 2.98331980719466e-08                                                                            | 26.8040106951872 | 0.321777039651235 |   |     |
| 7          | 75  | antigen processing and presentation of exogenous peptide antigen via MHC class I, TAP-dependent |                  |                   |   |     |
| GO:0051439 |     | 3.93136073909734e-08                                                                            | 25.6660691421255 | 0.334648121237285 |   |     |
| 7          | 78  | regulation of ubiquitin-protein ligase activity involved in mitotic cell cycle                  |                  |                   |   |     |
| GO:0000216 |     | 4.29919710162785e-08                                                                            | 25.3078282828283 | 0.338938481765968 |   |     |
| 7          | 79  | M/G1 transition of mitotic cell cycle                                                           |                  |                   |   |     |
| GO:0042590 |     | 4.29919710162785e-08                                                                            | 25.3078282828283 | 0.338938481765968 |   |     |
| 7          | 79  | antigen processing and presentation of exogenous peptide antigen via MHC class I                |                  |                   |   |     |
| GO:0071158 |     | 4.69574322344922e-08                                                                            | 24.959402241594  | 0.343228842294651 |   | 7   |
| 80         |     | positive regulation of cell cycle arrest                                                        |                  |                   |   |     |
| GO:0031575 |     | 5.58225818904681e-08                                                                            | 24.2904242424242 | 0.351809563352017 |   |     |
| 7          | 82  | mitotic cell cycle G1/S transition checkpoint                                                   |                  |                   |   |     |
| GO:0051443 |     | 5.58225818904681e-08                                                                            | 24.2904242424242 | 0.351809563352017 |   |     |
| 7          | 82  | positive regulation of ubiquitin-protein ligase activity                                        |                  |                   |   |     |
| GO:0002478 |     | 6.07609077336516e-08                                                                            | 23.9691387559809 | 0.3560999238807   |   | 7   |
| 83         |     | antigen processing and presentation of exogenous peptide antigen                                |                  |                   |   |     |
| GO:0031145 |     | 6.07609077336516e-08                                                                            | 23.9691387559809 | 0.3560999238807   |   | 7   |
| 83         |     | anaphase-promoting complex-dependent proteasomal ubiquitin-dependent protein catabolic process  |                  |                   |   |     |
| GO:0019884 |     | 7.17524577732959e-08                                                                            | 23.3512820512821 | 0.364680644938067 |   |     |
| 7          | 85  | antigen processing and presentation of exogenous antigen                                        |                  |                   |   |     |
| GO:0051351 |     | 7.78498809155745e-08                                                                            | 23.054085155351  | 0.36897100546675  |   | 7   |
| 86         |     | positive regulation of ligase activity                                                          |                  |                   |   |     |
| GO:0071779 |     | 7.78498809155745e-08                                                                            | 23.054085155351  | 0.36897100546675  |   | 7   |
| 86         |     | G1/S transition checkpoint                                                                      |                  |                   |   |     |
| GO:0051438 |     | 1.67020359586843e-07                                                                            | 20.4494382022472 | 0.411874610753581 |   |     |
| 7          | 96  | regulation of ubiquitin-protein ligase activity                                                 |                  |                   |   |     |
| GO:0002474 |     | 2.06528439981576e-07                                                                            | 19.7784584980237 | 0.42474569233963  |   |     |
| 7          | 99  | antigen processing and presentation of peptide antigen via MHC class I                          |                  |                   |   |     |
| GO:2000045 |     | 2.06528439981576e-07                                                                            | 19.7784584980237 | 0.42474569233963  |   |     |
| 7          | 99  | regulation of G1/S transition of mitotic cell cycle                                             |                  |                   |   |     |
| GO:0051340 |     | 2.21333232867953e-07                                                                            | 19.5644183773216 | 0.429036052868314 |   |     |
| 7          | 100 | regulation of ligase activity                                                                   |                  |                   |   |     |
| GO:0048002 |     | 3.75371955881779e-07                                                                            | 18.0046804680468 | 0.463358937097779 |   |     |
| 7          | 108 | antigen processing and presentation of peptide antigen                                          |                  |                   |   |     |
| GO:0031396 |     | 5.59805003514572e-07                                                                            | 13.175           | 0.720780568818767 | 8 | 168 |
|            |     | regulation of protein ubiquitination                                                            |                  |                   |   |     |
| GO:0030330 |     | 6.47889667386071e-07                                                                            | 16.5211570247934 | 0.501972181855927 |   |     |
| 7          | 117 | DNA damage response, signal transduction by p53 class mediator                                  |                  |                   |   |     |
| GO:0072331 |     | 9.0945033689989e-07                                                                             | 15.6600313479624 | 0.527714345028026 |   |     |
| 7          | 123 | signal transduction by p53 class mediator                                                       |                  |                   |   |     |
| GO:0031398 |     | 1.12898228644264e-06                                                                            | 15.1337878787879 | 0.544875787142758 |   |     |
| 7          | 127 | positive regulation of protein ubiquitination                                                   |                  |                   |   |     |
| GO:0000077 |     | 1.32138230143508e-06                                                                            | 14.7615668883962 | 0.557746868728808 |   |     |
| 7          | 130 | DNA damage checkpoint                                                                           |                  |                   |   |     |

Stable4\_20PerPair

|                       |                                                 |                      |                   |
|-----------------------|-------------------------------------------------|----------------------|-------------------|
| GO:0000084            | 1.6200271999712e-06                             | 14.2926270579814     | 0.57490831084354  |
| 7 134                 | S phase of mitotic cell cycle                   |                      |                   |
| GO:0031570            | 1.78934603801533e-06                            | 14.0690627202255     | 0.583489031900907 |
| 7 136                 | DNA integrity checkpoint                        |                      |                   |
| GO:0007093            | 2.07094577702927e-06                            | 13.7464187327824     | 0.596360113486956 |
| 7 139                 | mitotic cell cycle checkpoint                   |                      |                   |
| GO:0042770            | 2.17267426545028e-06                            | 13.6421052631579     | 0.600650474015639 |
| 7 140                 | signal transduction in response to DNA damage   |                      |                   |
| GO:0051320            | 2.5032781502014e-06                             | 13.3383689839572     | 0.613521555601688 |
| 7 143                 | S phase                                         |                      |                   |
| GO:2000602            | 3.0086052567158e-06                             | 12.9536363636364     | 0.630682997716421 |
| 7 147                 | regulation of interphase of mitotic cell cycle  |                      |                   |
| GO:0090068            | 3.59644367545003e-06                            | 12.5902777777778     | 0.647844439831154 |
| 7 151                 | positive regulation of cell cycle process       |                      |                   |
| GO:0019882            | 3.75749406192381e-06                            | 12.5025705329154     | 0.652134800359837 |
| 7 152                 | antigen processing and presentation             |                      |                   |
| GO:0010565            | 4.09769059308859e-06                            | 12.3307359307359     | 0.660715521417203 |
| 7 154                 | regulation of cellular ketone metabolic process |                      |                   |
| GO:0022613            | 5.00227944008482e-06                            | 9.67537122375832     | 0.965331118953706 |
| 8 225                 | ribonucleoprotein complex biogenesis            |                      |                   |
| GO:0007346            | 5.32100917347733e-06                            | 8.14112437427801     | 1.29997924019099  |
| 9 303                 | regulation of mitotic cell cycle                |                      |                   |
| GO:0000209            | 5.49755148002312e-06                            | 11.7644628099174     | 0.690748045117985 |
| 7 161                 | protein polyubiquitination                      |                      |                   |
| GO:0071843            | 7.79486493964174e-06                            | 9.08000641333975     | 1.02539616635527  |
| 8 239                 | cellular component biogenesis at cellular level |                      |                   |
| GO:0044106            | 1.27238935544509e-05                            | 10.2779958677686     | 0.785135976749014 |
| 7 183                 | cellular amine metabolic process                |                      |                   |
| GO:0000082            | 1.41424410995654e-05                            | 10.1036058913154     | 0.798007058335063 |
| 7 186                 | G1/S transition of mitotic cell cycle           |                      |                   |
| GO:0006520            | 1.51770278059607e-05                            | 6.28805620608899     | 1.87488755103453  |
| 10 437                | cellular amino acid metabolic process           |                      |                   |
| Tissue: Lung=>Thyroid | Type: asymmetric                                |                      |                   |
| SourceGene:           | RP11-252A24.3(ENSG00000261079.1)                |                      |                   |
| TargetGeneSet:        | RPL22                                           | RPL11                | RPS8              |
| VANGL1                | RPS27                                           | OLFML2B              | SLC45A3           |
| STEAP3-AS1            | WDR75                                           | TBC1D5               | RPL15             |
| RPL24                 | IGSF10                                          | SUCNR1               | NCBP2             |
| CDH10                 | NDUFAF2                                         | TAF9                 | SKP1              |
| MRPS33                | FNTA                                            | RPL30                | EIF3E             |
| RPL12                 | ZNF488                                          | RPS24                | RPS3AP5           |
| CYBASC3               | INTS5                                           | ARHGAP42             | RPS25             |
| TPT1                  | CYFIP1                                          | RPS3AP6              | RPL4              |
| RNS7P1                | RPL19                                           | TANC2                | CTD               |
| SNRPD3                | RBFOX2                                          | DMD                  | RPS4X             |
| GOBPID                | Pvalue                                          | OddsRatio            | ExpCount          |
| GO:0000184            | 27 119                                          | 3.65391600310303e-37 | 77.5978260869565  |
| GO:0006614            | 26 105                                          | 7.28082251612448e-37 | 85.5157652474108  |
| GO:0006613            | 26 106                                          | 9.61149598680075e-37 | 84.4409090909091  |
| GO:0045047            | 26 106                                          | 9.61149598680075e-37 | 84.4409090909091  |
| GO:0072599            | 26 106                                          | 9.61149598680075e-37 | 84.4409090909091  |
| GO:0006415            | 25 91                                           | 1.04706135830411e-36 | 96.7532467532468  |
| GO:0006413            | 28 152                                          | 8.51277798678427e-36 | 60.6950699939136  |
| GO:0070972            | 26 118                                          | 2.16200471202676e-35 | 73.3652173913043  |
| GO:0006414            |                                                 | 6.04349422700425e-35 | 79.7433035714286  |

STable4\_20PerPair

|                         |     |                                                    |                  |                   |  |                   |     |
|-------------------------|-----|----------------------------------------------------|------------------|-------------------|--|-------------------|-----|
| 25                      | 105 | translational elongation                           |                  |                   |  |                   |     |
| GO:0000956              |     | 1.07626458665364e-32                               | 50.0985915492958 |                   |  | 0.947270085115217 |     |
| 27                      | 169 | nuclear-transcribed mRNA catabolic process         |                  |                   |  |                   |     |
| GO:0019080              |     | 2.32797887638224e-32                               | 53.872           | 0.846377413327797 |  | 26                | 151 |
| viral genome expression |     |                                                    |                  |                   |  |                   |     |
| GO:0019083              |     | 2.32797887638224e-32                               | 53.872           | 0.846377413327797 |  | 26                | 151 |
| viral transcription     |     |                                                    |                  |                   |  |                   |     |
| GO:0006612              |     | 3.3583026947795e-32                                | 53.0161775232641 |                   |  | 0.857587710193066 |     |
| 26                      | 153 | protein targeting to membrane                      |                  |                   |  |                   |     |
| GO:0006402              |     | 4.75240277667812e-32                               | 47.0827814569536 |                   |  | 0.997716421008927 |     |
| 27                      | 178 | mRNA catabolic process                             |                  |                   |  |                   |     |
| GO:0043624              |     | 1.73709570067169e-30                               | 49.6721540178571 |                   |  | 0.857587710193066 |     |
| 25                      | 153 | cellular protein complex disassembly               |                  |                   |  |                   |     |
| GO:0006401              |     | 2.597541189495e-30                                 | 39.8651685393258 |                   |  | 1.14905542869006  |     |
| 27                      | 205 | RNA catabolic process                              |                  |                   |  |                   |     |
| GO:0043241              |     | 4.08264984439921e-30                               | 47.7879967776584 |                   |  | 0.885613452356238 |     |
| 25                      | 158 | protein complex disassembly                        |                  |                   |  |                   |     |
| GO:0034623              |     | 5.20334291210057e-29                               | 42.6084611697028 |                   |  | 0.975295827278389 |     |
| 25                      | 174 | cellular macromolecular complex disassembly        |                  |                   |  |                   |     |
| GO:0019058              |     | 7.32145164881366e-29                               | 34.7205882352941 |                   |  | 1.29478928793855  |     |
| 27                      | 231 | viral infectious cycle                             |                  |                   |  |                   |     |
| GO:0072594              |     | 8.87435596441952e-29                               | 37.6907048008172 |                   |  | 1.14345028025742  |     |
| 26                      | 204 | establishment of protein localization to organelle |                  |                   |  |                   |     |
| GO:0032984              |     | 1.09335072581424e-28                               | 41.2105751391466 |                   |  | 1.00332156944156  |     |
| 25                      | 179 | macromolecular complex disassembly                 |                  |                   |  |                   |     |
| GO:0022415              |     | 1.92562465238357e-27                               | 30.3369098712446 |                   |  | 1.45733859248495  |     |
| 27                      | 260 | viral reproductive process                         |                  |                   |  |                   |     |
| GO:0071845              |     | 5.81550425045238e-25                               | 25.8570824524313 |                   |  | 1.59186215486818  |     |
| 26                      | 284 | cellular component disassembly at cellular level   |                  |                   |  |                   |     |
| GO:0022411              |     | 8.38231358726506e-25                               | 25.4551006245663 |                   |  | 1.61428274859871  |     |
| 26                      | 288 | cellular component disassembly                     |                  |                   |  |                   |     |
| GO:0016032              |     | 8.44656826549977e-25                               | 19.4900097806343 |                   |  | 2.52792194311812  |     |
| 30                      | 451 | viral reproduction                                 |                  |                   |  |                   |     |
| GO:0006605              |     | 1.83009408600185e-20                               | 15.5738255033557 |                   |  | 2.65684035706871  |     |
| 27                      | 474 | protein targeting                                  |                  |                   |  |                   |     |
| GO:0033365              |     | 2.65914396454758e-19                               | 14.7243441122636 |                   |  | 2.65123520863608  |     |
| 26                      | 473 | protein localization to organelle                  |                  |                   |  |                   |     |
| GO:0042274              |     | 3.95076686206528e-08                               | 72.6568825910931 |                   |  | 0.10089267178742  |     |
| 5                       | 18  | ribosomal small subunit biogenesis                 |                  |                   |  |                   |     |
| GO:0022613              |     | 4.75662848291033e-08                               | 10.3949265687583 |                   |  | 1.26115839734274  |     |
| 11                      | 225 | ribonucleoprotein complex biogenesis               |                  |                   |  |                   |     |
| GO:0071843              |     | 8.8068938230315e-08                                | 9.74699248120301 |                   |  | 1.33963047539963  |     |
| 11                      | 239 | cellular component biogenesis at cellular level    |                  |                   |  |                   |     |
| GO:0034660              |     | 5.16038454072388e-07                               | 8.08425443169969 |                   |  | 1.59746730330081  |     |
| 11                      | 285 | ncRNA metabolic process                            |                  |                   |  |                   |     |
| GO:0042254              |     | 1.80178798662566e-06                               | 11.0591664237832 |                   |  | 0.835167116462529 |     |
| 8                       | 149 | ribosome biogenesis                                |                  |                   |  |                   |     |
| GO:0006364              |     | 1.83261892452835e-06                               | 13.9190582334912 |                   |  | 0.58293543699398  |     |
| 7                       | 104 | rRNA processing                                    |                  |                   |  |                   |     |
| GO:0016072              |     | 2.6722829451218e-06                                | 13.1027289425348 |                   |  | 0.616566327589786 |     |
| 7                       | 110 | rRNA metabolic process                             |                  |                   |  |                   |     |
| GO:0034470              |     | 1.5854029672272e-05                                | 8.09246575342466 |                   |  | 1.12102968652688  |     |
| 8                       | 200 | ncRNA processing                                   |                  |                   |  |                   |     |

Tissue: Lung=>Thyroid Type: asymmetric

SourceGene: RP11-321G12.1(ENSG00000259459.1)

|                |           |           |          |          |          |          |         |          |
|----------------|-----------|-----------|----------|----------|----------|----------|---------|----------|
| TargetGeneSet: | FCRL5     | FCRL2     | FCRLA    | SLAMF7   | IGKJ4    | IGKV4-1  | IGKV1-9 | IGKV3-15 |
| IGKV1-17       | IGKV3-20  | IGKV2-28  | IGKV2-30 | IGKV1-39 |          |          |         |          |
| IGKV3D-11      | TMEM156   | RP11      | POU2AF1  | TRAV10   | IGHG2    | IGHG3    | IGHM    | IGHJ6    |
| IGHJ5          | KIAA0125  | IGHV6-1   | IGHV4-4  | IGHV3-7  | IGHV3-11 | IGHV3-23 |         |          |
| IGHV3-30       | IGHV4-39  | IGHV1-46  | IGHV1-69 | CTD      | UBE2I    |          |         |          |
| TNFRSF17       | TNFRSF13B | JSRP1     | CD79A    | IGLV1-51 | IGLV1-44 |          |         |          |
| IGLV3-25       | IGLV2-23  | IGLV3-19  | IL2RG    |          |          |          |         |          |
| GOBPID         | Pvalue    | OddsRatio | ExpCount | Count    | Size     | Term     |         |          |



Stable4\_20PerPair

|                                             |                                                                                                                           |                  |                    |
|---------------------------------------------|---------------------------------------------------------------------------------------------------------------------------|------------------|--------------------|
| GO:0006958                                  | 1.512271440273e-11                                                                                                        | 178.388429752066 | 0.0588194588609785 |
| 6 50                                        | complement activation, classical pathway                                                                                  |                  |                    |
| GO:0006959                                  | 4.65871068408555e-11                                                                                                      | 87.1591304347826 | 0.143519479620787  |
| 7 122                                       | humoral immune response                                                                                                   |                  |                    |
| GO:0006956                                  | 6.41139492144295e-11                                                                                                      | 137.578947368421 | 0.0741125181648329 |
| 6 63                                        | complement activation                                                                                                     |                  |                    |
| GO:0002455                                  | 7.78389893721975e-11                                                                                                      | 132.896764252696 | 0.076465296519272  |
| 6 65                                        | humoral immune response mediated by circulating immunoglobulin                                                            |                  |                    |
| GO:0072376                                  | 3.26329245860814e-10                                                                                                      | 103.047846889952 | 0.0964639125320047 |
| 6 82                                        | protein activation cascade                                                                                                |                  |                    |
| GO:0002449                                  | 4.28173735817395e-10                                                                                                      | 62.44875         | 0.196456992595668  |
| 167                                         | lymphocyte mediated immunity                                                                                              |                  | 7                  |
| GO:0016064                                  | 2.07038944420833e-09                                                                                                      | 74.4363636363636 | 0.130579198671372  |
| 6 111                                       | immunoglobulin mediated immune response                                                                                   |                  |                    |
| GO:0002443                                  | 2.2006586756438e-09                                                                                                       | 48.828431372549  | 0.248218116393329  |
| 211                                         | leukocyte mediated immunity                                                                                               |                  | 7                  |
| GO:0019724                                  | 2.4338007599768e-09                                                                                                       | 72.3535353535353 | 0.134108366203031  |
| 6 114                                       | B cell mediated immunity                                                                                                  |                  |                    |
| GO:0002253                                  | 2.46469607360309e-08                                                                                                      | 33.9020547945205 | 0.351740363988651  |
| 7 299                                       | activation of immune response                                                                                             |                  |                    |
| GO:0002460                                  | 3.92217118292969e-08                                                                                                      | 44.4436363636364 | 0.212926441076742  |
| 6 181                                       | adaptive immune response based on somatic recombination of immune receptors built from immunoglobulin superfamily domains |                  |                    |
| GO:0002250                                  | 6.69476686163987e-08                                                                                                      | 40.4602272727273 | 0.232925057089475  |
| 6 198                                       | adaptive immune response                                                                                                  |                  |                    |
| GO:0050778                                  | 9.50380640091185e-08                                                                                                      | 27.6019607843137 | 0.428205660507923  |
| 7 364                                       | positive regulation of immune response                                                                                    |                  |                    |
| GO:0002252                                  | 1.41854204788672e-07                                                                                                      | 25.9591029023747 | 0.454086222406754  |
| 7 386                                       | immune effector process                                                                                                   |                  |                    |
| Tissue: Lung=>Thyroid Type: cluster         |                                                                                                                           |                  |                    |
| SourceGene: RP11-61I13.2(ENSG00000240126.1) |                                                                                                                           |                  |                    |
| TargetGeneSet:                              | TAS1R3                                                                                                                    | RPL22            | ICMT               |
| PDIA3P                                      | DUSP10                                                                                                                    | FAM177B          | RPS7               |
| PSMD14                                      | WIPF1                                                                                                                     | ZNF804A          | RPL32              |
| RPL35A                                      | CLNK                                                                                                                      | PCDH7            | RPL34              |
| RPL10A                                      | RPL39P3                                                                                                                   | SNHG5            | UBE2J1             |
| RPL7A                                       | ADAMTSL2                                                                                                                  | CARD9            | RPL13AP5           |
| SLC37A2                                     | PHB2                                                                                                                      | PPM1H            | RPL6               |
| RPL3P4                                      | PLCB2                                                                                                                     | GALK2            | RPS3AP6            |
| RPL27                                       | MRPL10                                                                                                                    | C18orf21         | RPL17              |
| KCNN4                                       | ALDH16A1                                                                                                                  | RPS11            | RPL28              |
| ALG12                                       | EIF2S3                                                                                                                    | CYBB             | WAS                |
| GOBPID                                      | Pvalue                                                                                                                    | OddsRatio        | ExpCount           |
| GO:0006415                                  | 6.90789313649414e-46                                                                                                      | 142.44234728895  | 0.478582797038267  |
| 91                                          | translational termination                                                                                                 |                  | 29                 |
| GO:0006414                                  | 7.3412890508891e-46                                                                                                       | 124.347826086957 | 0.552210919659539  |
| 30 105                                      | translational elongation                                                                                                  |                  |                    |
| GO:0006614                                  | 8.82178008367986e-44                                                                                                      | 116.089305711086 | 0.552210919659539  |
| 29 105                                      | SRP-dependent cotranslational protein targeting to membrane                                                               |                  |                    |
| GO:0006613                                  | 1.21058252063162e-43                                                                                                      | 114.573639126831 | 0.557470071275344  |
| 29 106                                      | cotranslational protein targeting to membrane                                                                             |                  |                    |
| GO:0045047                                  | 1.21058252063162e-43                                                                                                      | 114.573639126831 | 0.557470071275344  |
| 29 106                                      | protein targeting to ER                                                                                                   |                  |                    |
| GO:0072599                                  | 1.21058252063162e-43                                                                                                      | 114.573639126831 | 0.557470071275344  |
| 29 106                                      | establishment of protein localization to endoplasmic reticulum                                                            |                  |                    |
| GO:0006413                                  | 2.45218234314814e-42                                                                                                      | 81.1522497704316 | 0.799391045602381  |
| 31 152                                      | translational initiation                                                                                                  |                  |                    |
| GO:0070972                                  | 4.18852763160563e-42                                                                                                      | 99.0423141286158 | 0.620579890665006  |
| 29 118                                      | protein localization to endoplasmic reticulum                                                                             |                  |                    |
| GO:0000184                                  | 5.52061833857549e-42                                                                                                      | 97.934988179669  | 0.625839042280811  |
| 119                                         | nuclear-transcribed mRNA catabolic process, nonsense-mediated decay                                                       |                  | 29                 |
| GO:0006612                                  | 2.39608350147145e-40                                                                                                      | 75.5673382820785 | 0.804650197218186  |
| 30 153                                      | protein targeting to membrane                                                                                             |                  |                    |

Stable4\_20PerPair

|                                                                    |                                                    |                  |                     |    |   |
|--------------------------------------------------------------------|----------------------------------------------------|------------------|---------------------|----|---|
| GO:0019080                                                         | 1.16117058049162e-38                               | 72.0852807813045 | 0.794131893986575   |    |   |
| 29 151                                                             | viral genome expression                            |                  |                     |    |   |
| GO:0019083                                                         | 1.16117058049162e-38                               | 72.0852807813045 | 0.794131893986575   |    |   |
| 29 151                                                             | viral transcription                                |                  |                     |    |   |
| GO:0043624                                                         | 1.75930892269342e-38                               | 70.9126630061771 | 0.804650197218186   |    |   |
| 29 153                                                             | cellular protein complex disassembly               |                  |                     |    |   |
| GO:0043241                                                         | 4.8426714214098e-38                                | 68.1401946231239 | 0.830945955297211   |    |   |
| 29 158                                                             | protein complex disassembly                        |                  |                     |    |   |
| GO:0000956                                                         | 3.98029982689823e-37                               | 62.7378419452888 | 0.888796623071068   |    |   |
| 29 169                                                             | nuclear-transcribed mRNA catabolic process         |                  |                     |    |   |
| GO:0034623                                                         | 9.86271865464611e-37                               | 60.5531914893617 | 0.915092381150093   |    |   |
| 29 174                                                             | cellular macromolecular complex disassembly        |                  |                     |    |   |
| GO:0006402                                                         | 1.99659358825539e-36                               | 58.9110381265172 | 0.936128987613314   |    |   |
| 29 178                                                             | mRNA catabolic process                             |                  |                     |    |   |
| GO:0032984                                                         | 2.37502413074469e-36                               | 58.5141843971631 | 0.941388139229119   |    |   |
| 29 179                                                             | macromolecular complex disassembly                 |                  |                     |    |   |
| GO:0019058                                                         | 1.2853668530197e-34                                | 45.9896171317326 | 1.21486402325099    |    |   |
| 30 231                                                             | viral infectious cycle                             |                  |                     |    |   |
| GO:0072594                                                         | 1.32394683462339e-34                               | 50.0668693009119 | 1.07286692962425    |    |   |
| 29 204                                                             | establishment of protein localization to organelle |                  |                     |    |   |
| GO:0006401                                                         | 1.53718455382506e-34                               | 49.7788926499033 | 1.07812608124005    |    |   |
| 29 205                                                             | RNA catabolic process                              |                  |                     |    |   |
| GO:0022415                                                         | 5.12477291362589e-33                               | 40.1086956521739 | 1.36737942010933    |    |   |
| 30 260                                                             | viral reproductive process                         |                  |                     |    |   |
| GO:0071845                                                         | 2.77080103453608e-30                               | 34.1660408844389 | 1.49359905888866    |    |   |
| 29 284                                                             | cellular component disassembly at cellular level   |                  |                     |    |   |
| GO:0022411                                                         | 4.19204585584231e-30                               | 33.6288507352337 | 1.51463566535188    |    |   |
| 29 288                                                             | cellular component disassembly                     |                  |                     |    |   |
| GO:0016032                                                         | 3.99163768454759e-27                               | 22.8891534391534 | 2.37187737872812    |    |   |
| 31 451                                                             | viral reproduction                                 |                  |                     |    |   |
| GO:0006605                                                         | 1.82993938591163e-26                               | 21.6650112866817 | 2.49283786589163    |    |   |
| 31 474                                                             | protein targeting                                  |                  |                     |    |   |
| GO:0033365                                                         | 3.64606300734513e-25                               | 20.5103543036608 | 2.48757871427583    |    |   |
| 30 473                                                             | protein localization to organelle                  |                  |                     |    |   |
| GO:0022613                                                         | 2.40552140418525e-08                               | 11.198490294752  | 1.18330911355616    | 11 |   |
| 225                                                                | ribonucleoprotein complex biogenesis               |                  |                     |    |   |
| GO:0071843                                                         | 4.47372398009831e-08                               | 10.5004723346829 | 1.25693723617743    |    |   |
| 11 239                                                             | cellular component biogenesis at cellular level    |                  |                     |    |   |
| GO:0042254                                                         | 8.1785039138301e-08                                | 13.658315565032  | 0.783613590754965   | 9  |   |
| 149                                                                | ribosome biogenesis                                |                  |                     |    |   |
| GO:0042273                                                         | 3.38648218066051e-07                               | 99.7708333333333 | 0.0631098193896616  |    |   |
| 4 12                                                               | ribosomal large subunit biogenesis                 |                  |                     |    |   |
| GO:0006364                                                         | 1.74693870538412e-05                               | 12.4871720116618 | 0.546951768043734   |    |   |
| 6 104                                                              | rRNA processing                                    |                  |                     |    |   |
| Tissue: Lung=>Whole_Blood                                          | Type: asymmetric                                   |                  |                     |    |   |
| SourceGene: ALB(ENSG00000163631.11)                                |                                                    |                  |                     |    |   |
| TargetGeneSet: C8A HHLA3 RP11 APCS CFHR2 CFHR5 APOB NAT8           |                                                    |                  |                     |    |   |
| RPL23AP7 SLC2A2 ALB AFM C9 DMGDH BHMT PLG FGL1                     |                                                    |                  |                     |    |   |
| CYP2C18 CYP2C9 CTD APOA1 CMA1 SERPINA4 FOXA3 RP4 F9                |                                                    |                  |                     |    |   |
| GOBPID Pvalue OddsRatio ExpCount Count Size Term                   |                                                    |                  |                     |    |   |
| GO:0006957                                                         | 1.10269643018981e-06                               | 206.956937799043 | 0.021313403916684   |    |   |
| 3 14                                                               | complement activation, alternative pathway         |                  |                     |    |   |
| GO:0072376                                                         | 6.51653803394752e-06                               | 40.8860398860399 | 0.124835651512006   |    |   |
| 4 82                                                               | protein activation cascade                         |                  |                     |    |   |
| GO:0001907                                                         | 6.63126733129481e-06                               | 1442.8           | 0.00456715798214656 | 2  | 3 |
| killing by symbiont of host cells                                  |                                                    |                  |                     |    |   |
| GO:0044004                                                         | 6.63126733129481e-06                               | 1442.8           | 0.00456715798214656 | 2  | 3 |
| disruption by symbiont of host cell                                |                                                    |                  |                     |    |   |
| GO:0006579                                                         | 1.32502969607106e-05                               | 721.35           | 0.00608954397619542 | 2  | 4 |
| amino-acid betaine catabolic process                               |                                                    |                  |                     |    |   |
| Tissue: Whole_Blood=>Lung                                          | Type: cluster                                      |                  |                     |    |   |
| SourceGene: C9orf114(ENSG00000198917.6)                            |                                                    |                  |                     |    |   |
| TargetGeneSet: VPS13D NFYC DENND2D SLC50A1 ASH1L PMF1 FCRL3 SLAMF6 |                                                    |                  |                     |    |   |

Stable4\_20PerPair

|          |       |        |           |         |           |          |         |         |         |     |
|----------|-------|--------|-----------|---------|-----------|----------|---------|---------|---------|-----|
| CDC73    | RP11  | TMEM18 | PDIA6     | ADCY3   | DYNC2LI1  | C2orf27B | METTL5  |         |         |     |
| ABCB6    | HDLBP | TMEM43 | CCR2      | SLC26A6 | TSC22D2   | TRAM1L1  | BRIX1   | PHF15   | TXNDC15 | PDF |
| LARP1    | CANX  | TRIM52 | TXNDC5    | E2F3    | TOMM6     | RP3      | KDEL2   | LSM5    | IKZF1   |     |
| ZKSCAN1  | ORC5  | CALU   | PDIA4     | ECD     | RPP30     | SFR1     | SMNDC1  | NUCB2   | SPTBN2  |     |
| CWF19L2  | HYOU1 | STT3A  | KIAA0528  |         | FKBP11    | NUP37    | HSP90B1 | SLC41A2 | MLEC    |     |
| ZNF26    | GTF3A | ESD    | POLE2     | RDH11   | LINC00341 |          | COMMD4  | SNHG9   | CLEC16A |     |
| SERPINF2 |       | ACAP1  | SPAG5-AS1 |         | KIAA0100  |          | CTB     | AOC2    | INO80C  |     |
| LMAN1    | CALR  | JUND   | PGPEP1    | PCNA    | MIS18A    | RP4      | PPARA   | CRELD2  | NCAPH2  |     |
| PTCHD1   | AR    | MAGT1  | TAF9B     |         |           |          |         |         |         |     |

| GOBPID     | Pvalue | OddsRatio | ExpCount             | Count            | Size | Term             |
|------------|--------|-----------|----------------------|------------------|------|------------------|
| GO:0006457 | 9      | 216       | 8.21351440005903e-07 | 10.2717391304348 |      | 1.03134731160473 |

|            |   |    |                      |                  |  |                  |
|------------|---|----|----------------------|------------------|--|------------------|
|            |   |    |                      |                  |  | protein folding  |
| GO:0006487 | 6 | 92 | 4.90339324014159e-06 | 15.8316722037652 |  | 0.43927755864646 |

|            |   |    |                      |                  |  |                                |
|------------|---|----|----------------------|------------------|--|--------------------------------|
|            |   |    |                      |                  |  | protein N-linked glycosylation |
| GO:0032075 | 5 | 66 | 1.52772707948791e-05 | 18.3414446721311 |  | 0.315133900768113              |

Tissue: Lung=>whole\_Blood Type: asymmetric

SourceGene: CTB-85P21.2(ENSG00000259787.1)

|                |          |        |        |       |          |          |        |
|----------------|----------|--------|--------|-------|----------|----------|--------|
| TargetGeneSet: | VAV3-AS1 | CD48   | CAPN2  | ARPC2 | ANKMY1   | UBA3     | COL8A1 |
| PDGFRA         | TMSB4XP8 | GTF2H5 | TAS2R4 | CTA   | C9orf103 | TMSB4XP4 |        |

|       |       |         |        |        |        |      |       |       |       |
|-------|-------|---------|--------|--------|--------|------|-------|-------|-------|
| WDR34 | TNKS2 | RP11    | FEN1   | CRABP1 | CLSTN3 | BIN2 | DOCK9 | WDHD1 | TIPIN |
| GINS3 | SIRT6 | PPIAP22 | RRM2P3 | BEX4   |        |      |       |       |       |

| GOBPID     | Pvalue | OddsRatio | ExpCount             | Count            | Size | Term              |
|------------|--------|-----------|----------------------|------------------|------|-------------------|
| GO:0006260 | 5      | 268       | 1.98599441849477e-05 | 19.2409016838675 |      | 0.352363158258944 |

Tissue: whole\_Blood=>Lung Type: asymmetric

SourceGene: ENSG00000261008.2

|                |         |       |      |          |        |       |        |        |
|----------------|---------|-------|------|----------|--------|-------|--------|--------|
| TargetGeneSet: | SMPDL3B | CNTN2 | NEK2 | OR2L2    | POU3F3 | SYNPR | MIR922 | MAD2L1 |
| BRCC3          | SAPCD1  | GRM4  | MCM3 | RPS17P13 | PRRT4  | DEFA4 | DEFA1  | DEFA1B |

|       |      |        |        |         |          |      |       |         |        |     |
|-------|------|--------|--------|---------|----------|------|-------|---------|--------|-----|
| DEFA3 | RP11 | IFIT1B | CALHM1 | SIGIRR  | C11orf41 | TCN1 | MS4A3 | MMP8    |        |     |
| TMTC1 | SVOP | SKA3   | TMX1   | HERPUD1 | MPO      | AZU1 | ELANE | CEACAM8 | SHISA7 | 7SK |

| GOBPID     | Pvalue | OddsRatio | ExpCount             | Count            | Size | Term               |
|------------|--------|-----------|----------------------|------------------|------|--------------------|
| GO:0050832 | 5      | 20        | 1.23515231214828e-10 | 252.842105263158 |      | 0.0332156944156114 |

|            |   |    |                      |                  |  |                            |
|------------|---|----|----------------------|------------------|--|----------------------------|
|            |   |    |                      |                  |  | defense response to fungus |
| GO:0009620 | 5 | 33 | 1.86399749503958e-09 | 135.328947368421 |  | 0.0548058957857588         |

|            |   |    |                      |                  |  |                    |
|------------|---|----|----------------------|------------------|--|--------------------|
|            |   |    |                      |                  |  | response to fungus |
| GO:0031640 | 4 | 26 | 8.53536891126382e-08 | 130.954545454545 |  | 0.0431804027402948 |

|            |   |    |                      |                  |  |                                    |
|------------|---|----|----------------------|------------------|--|------------------------------------|
|            |   |    |                      |                  |  | killing of cells of other organism |
| GO:0044364 | 4 | 26 | 8.53536891126382e-08 | 130.954545454545 |  | 0.0431804027402948                 |

|            |   |     |                      |                  |  |                                       |
|------------|---|-----|----------------------|------------------|--|---------------------------------------|
|            |   |     |                      |                  |  | disruption of cells of other organism |
| GO:0009617 | 7 | 342 | 9.56888627265752e-07 | 17.3211589113257 |  | 0.567988374506954                     |

|            |   |    |                      |                  |  |                       |
|------------|---|----|----------------------|------------------|--|-----------------------|
|            |   |    |                      |                  |  | response to bacterium |
| GO:0045073 | 3 | 13 | 1.13864338687663e-06 | 205.957142857143 |  | 0.0215902013701474    |

|            |   |    |                      |                  |  |                                              |
|------------|---|----|----------------------|------------------|--|----------------------------------------------|
|            |   |    |                      |                  |  | regulation of chemokine biosynthetic process |
| GO:0042033 | 3 | 14 | 1.44760299206345e-06 | 187.220779220779 |  | 0.023250986090928                            |

|            |   |    |                      |                  |  |                                |
|------------|---|----|----------------------|------------------|--|--------------------------------|
|            |   |    |                      |                  |  | chemokine biosynthetic process |
| GO:0050755 | 3 | 15 | 1.80753155153579e-06 | 171.607142857143 |  | 0.0249117708117085             |

|            |   |    |                      |                  |  |                             |
|------------|---|----|----------------------|------------------|--|-----------------------------|
|            |   |    |                      |                  |  | chemokine metabolic process |
| GO:0035821 | 4 | 66 | 3.93630713736036e-06 | 46.3387096774194 |  | 0.109611791571518           |

|            |   |    |                      |                  |  |                                                            |
|------------|---|----|----------------------|------------------|--|------------------------------------------------------------|
|            |   |    |                      |                  |  | modification of morphology or physiology of other organism |
| GO:0001906 | 4 | 69 | 4.70590517975697e-06 | 44.1907692307692 |  | 0.114594145733859                                          |

|            |   |   |                      |                  |  |                     |
|------------|---|---|----------------------|------------------|--|---------------------|
|            |   |   |                      |                  |  | cell killing        |
| GO:0045079 | 2 | 3 | 7.92234085030777e-06 | 1311.45454545455 |  | 0.00498235416234171 |

|                           |  |  |  |  |  |                                                       |
|---------------------------|--|--|--|--|--|-------------------------------------------------------|
|                           |  |  |  |  |  | negative regulation of chemokine biosynthetic process |
| Tissue: whole_Blood=>Lung |  |  |  |  |  | Type: asymmetric                                      |

SourceGene: FHIT(ENSG00000189283.5)

|                |        |         |        |       |        |        |         |        |      |
|----------------|--------|---------|--------|-------|--------|--------|---------|--------|------|
| TargetGeneSet: | TAGLN2 | FAM150B | ADCY3  | CTD   | FGF1   | EBF1   | CDCA7L  | CA3    |      |
| CCNT1          | RP11   | KL      | MYL12A | ACER1 | ZNF121 | GATSL3 | SEC14L2 | GUCY2F | GPC3 |

| GOBPID     | Pvalue | OddsRatio | ExpCount             | Count            | Size | Term                |
|------------|--------|-----------|----------------------|------------------|------|---------------------|
| GO:0045542 | 2      | 5         | 8.70129881364286e-06 | 801.888888888889 |      | 0.00484395543560999 |

|  |  |  |  |  |  |                                                         |
|--|--|--|--|--|--|---------------------------------------------------------|
|  |  |  |  |  |  | positive regulation of cholesterol biosynthetic process |
|--|--|--|--|--|--|---------------------------------------------------------|

Stable4\_20PerPair

GO:0090205 1.30447221048509e-05 601.375 0.00581274652273199 2 6  
 positive regulation of cholesterol metabolic process  
 Tissue: Lung=>whole\_Blood Type: cluster  
 SourceGene: GABRA1(ENSG0000022355.10)  
 TargetGeneSet: MTND2P28 GABRD C1orf173 KCNJ9 RP3 ASTN1 RP11  
 VSNL1 POU3F3 SCN2A KIF1A SLC6A1 ARPP21 MOBP CAMKV CADPS SYNPR  
 CADM2 TAGLN3 GAP43 ZIC1 SOX2-OT CXXC4 GRIA2 CTNND2 SPINK5 CAMK2A  
 TIMD4 GABRB2 CPLX2 NRSN1 BEND6 RIMS1 SNAP91 MYL7 VSTM2A CALN1  
 FAM86B2 PSD3 PENK STMN2 LY6H SH3GL2 SLC25A16 GPR158 LGI1 INA  
 ANO3 SYT13 TMEM151A SYT12 ELMOD1 OPCML KCNA1 CNTN1 FAIM2  
 KCNC2 SYT1 SVOP CTD GABRB3 DDX11L9 CBLN1 MT3 VAT1L EFNB3  
 PPP1R1B GFAP DSG1 ST8SIA3 CELF5 CASP14 UNC13A VSTM2B PNMAL1 SLC8A2  
 TTYH1 SYT5 PEG3 SNAP25 NCAM2 SULT4A1 FRMPD4 TCEAL5 PLP1 GRIA3  
 H2AFB2  
 GOBPID Pvalue OddsRatio ExpCount Count Size Term  
 GO:0048489 1.89882609211438e-09 41.5080611823067 0.219223583143035  
 7 48 synaptic vesicle transport  
 GO:0016079 3.91936183998243e-09 59.8375 0.137014739464397 6 30  
 synaptic vesicle exocytosis  
 GO:0006836 6.43090363346774e-08 17.7371854613234 0.543491799875441  
 8 119 neurotransmitter transport  
 GO:0001505 8.32494509922324e-08 17.1154422788606 0.561760431804027  
 8 123 regulation of neurotransmitter levels  
 GO:0007269 1.20939271320294e-07 21.4850890366874 0.392775586464605  
 7 86 neurotransmitter secretion  
 GO:0003001 1.26303098339968e-05 7.24052803017315 1.44322192235831  
 9 316 generation of a signal involved in cell-cell signaling  
 GO:0023061 1.26303098339968e-05 7.24052803017315 1.44322192235831  
 9 316 signal release  
 Tissue: Lung=>whole\_Blood Type: asymmetric  
 SourceGene: GAD2(ENSG00000136750.7)  
 TargetGeneSet: MTND2P28 GABRD NPPA NCDN PRCC RP3 CNTN2  
 TMEM178 POU3F3 KIF1A ARPP21 MOBP CAMKV GAP43 CTNND2 MTND5P11  
 CAMK2A GABRA6 GABRA1 CPLX2 GRM4 RIMS1 SNAP91 DGKB CALN1 GPR22  
 KCND2 NEFM RP11 ZER1 GRIN1 PTPN5 ANO3 SYT13 SYT12 ELMOD1  
 C11orf87 OPCML PRMT8 FAIM2 KCNC2 SYT1 GABRB3 PPP1R1B GFAP  
 ST8SIA3 CASP14 TTYH1 SNAP25 RIMS4 NCAM2 FRMPD4 TMEM35 PLP1 H2AFB2 MT  
 GOBPID Pvalue OddsRatio ExpCount Count Size Term  
 GO:0006836 1.19686617063823e-07 21.7850609756098 0.395266763545775  
 7 119 neurotransmitter transport  
 GO:0016079 2.75548337057949e-06 50.2692307692308 0.0996470832468341  
 4 30 synaptic vesicle exocytosis  
 GO:0001505 3.08159567979656e-06 17.4432234432234 0.40855304131202  
 6 123 regulation of neurotransmitter levels  
 GO:0007612 5.74622045437605e-06 22.8257406817458 0.259082416441769  
 5 78 learning  
 GO:0007611 6.79349737194285e-06 15.0984126984127 0.46834129126012  
 6 141 learning or memory  
 GO:0048167 6.92221761903358e-06 21.9201346389229 0.269047124766452  
 5 81 regulation of synaptic plasticity  
 GO:0007269 9.29306926751621e-06 20.5598621877692 0.285654971974258  
 5 86 neurotransmitter secretion  
 GO:0050890 1.12668599004808e-05 13.7596525096525 0.511521694000415  
 6 154 cognition  
 GO:0048489 1.87251837297196e-05 29.6673553719008 0.159435333194935  
 4 48 synaptic vesicle transport  
 Tissue: Lung=>whole\_Blood Type: cluster  
 SourceGene: HIST1H3G(ENSG00000256018.1)  
 TargetGeneSet: DPH5 KIF14 IGKJ5 IGKC IGKJ4 IGKJ1 IGKV1-5 BUB1  
 C2orf76 ITM2C RP11 MUM1 TUBB KIFC1 TMEM217 BHLHA15 PNOG GINS4 MCM4  
 ADRA2A ZWINT BLNK FEN1 CDCA5 POU2AF1 IGHG4 IGHGP IGHG3 IGHJ3  
 IGHV3-15 IGHV3-23 IGHV3-48 CCNB2 PLK1 SHCBP1 GINS2  
 AURKB CDC6 TYMS RP4 MYBL2 TOX2 UBE2C CDC45 IGLV6-57

| IGLV1-47   |                                         | IGLV5-45                                          |                                                                    | Stable4_20PerPair |                    | IGLV2-11           |   | IGLV2-5 DERL3 |     |
|------------|-----------------------------------------|---------------------------------------------------|--------------------------------------------------------------------|-------------------|--------------------|--------------------|---|---------------|-----|
| EMID1      |                                         |                                                   |                                                                    |                   |                    |                    |   |               |     |
| GOBPID     | Pvalue                                  | OddsRatio                                         | ExpCount                                                           | Count             | Size               | Term               |   |               |     |
| GO:0000280 | 350                                     | nuclear division                                  | 3.56820526717671e-10                                               | 19.03232546706    | 0.847692201231749  |                    |   |               | 11  |
| GO:0007067 | 350                                     | mitosis                                           | 3.56820526717671e-10                                               | 19.03232546706    | 0.847692201231749  |                    |   |               | 11  |
| GO:0000087 | 11                                      | 360                                               | 4.8108195251696e-10                                                | 18.4738538681948  |                    | 0.871911978409799  |   |               |     |
| GO:0048285 | 11                                      | 370                                               | 6.42971331608528e-10                                               | 17.9464948932219  |                    | 0.896131755587849  |   |               |     |
| GO:0051329 | 10                                      | 379                                               | 1.39906751290807e-08                                               | 15.2271002710027  |                    | 0.917929555048094  |   |               |     |
| GO:0006959 | 7                                       | 122                                               | 1.42054170376897e-08                                               | 31.0891304347826  |                    | 0.29548128157221   |   |               |     |
| GO:0006271 | 34                                      | DNA strand elongation involved in DNA replication | 1.63685597606566e-08                                               | 82.683908045977   | 0.0823472424053699 |                    |   |               | 5   |
| GO:0051325 | 10                                      | 387                                               | 1.70633811698216e-08                                               | 14.8954907161804  |                    | 0.937305376790533  |   |               |     |
| GO:0022616 | 5                                       | 37                                                | 2.55089434850277e-08                                               | 74.9166666666667  |                    | 0.0896131755587849 |   |               |     |
| GO:0010564 | 10                                      | 414                                               | 3.23201463478949e-08                                               | 13.8732673267327  |                    | 1.00269877517127   |   |               |     |
| GO:0000075 | 8                                       | 242                                               | 8.77633934063887e-08                                               | 17.9575815131371  |                    | 0.586118607708809  |   |               |     |
| GO:0006958 | 5                                       | 50                                                | 1.21229372537794e-07                                               | 53.2259259259259  |                    | 0.12109888589025   |   |               |     |
| GO:0071156 | 8                                       | 264                                               | 1.71334688508739e-07                                               | 16.3888888888889  |                    | 0.639402117500519  |   |               |     |
| GO:0051983 | 4                                       | 24                                                | 2.95970386617748e-07                                               | 92.8774193548387  |                    | 0.0581274652273199 |   |               |     |
| GO:0006956 | 5                                       | 63                                                | 3.93211835776371e-07                                               | 41.2586206896552  |                    | 0.152584596221715  |   |               |     |
| GO:0002455 | 5                                       | 65                                                | 4.60480650898323e-07                                               | 39.8777777777778  |                    | 0.157428551657325  |   |               |     |
| GO:0000084 | 6                                       | 134                                               | 7.39386892761105e-07                                               | 23.0948275862069  |                    | 0.32454501418587   |   |               |     |
| GO:0051301 | 9                                       | 452                                               | 9.05976370007049e-07                                               | 10.9183017885049  |                    | 1.09473392844786   |   |               |     |
| GO:0007059 | 6                                       | 140                                               | 9.56423966186795e-07                                               | 22.0514668039115  |                    | 0.339076880492699  |   |               |     |
| GO:0051320 | 6                                       | 143                                               | 1.08305274167737e-06                                               | 21.5640573873647  |                    | 0.346342813646114  |   |               |     |
| GO:0072376 | 5                                       | 82                                                | 1.47696702907015e-06                                               | 31.0367965367965  |                    | 0.19860217286001   |   |               |     |
| GO:0007050 | 8                                       | 369                                               | 2.15655126127038e-06                                               | 11.5358571868267  |                    | 0.893709777870044  |   |               |     |
| GO:0006261 | 5                                       | 93                                                | 2.76009753716617e-06                                               | 27.1363636363636  |                    | 0.225243927755865  |   |               |     |
| GO:0006260 | 7                                       | 268                                               | 3.00862339806096e-06                                               | 13.5584291187739  |                    | 0.649090028371739  |   |               |     |
| GO:0007017 | 8                                       | 393                                               | 3.44455065565553e-06                                               | 10.7982683982684  |                    | 0.951837243097364  |   |               |     |
| GO:0016064 | immunoglobulin mediated immune response |                                                   | 6.59747971644911e-06                                               | 22.5              | 0.268839526676355  |                    | 5 |               | 111 |
| GO:0019724 | 5                                       | 114                                               | 7.51772815983643e-06                                               | 21.8761467889908  |                    | 0.27610545982977   |   |               |     |
| GO:0045786 | 8                                       | 437                                               | 7.52827705504051e-06                                               | 9.66036432703099  |                    | 1.05840426268078   |   |               |     |
| GO:0000083 | 3                                       | 22                                                | 1.94207783226368e-05                                               | 71.0378289473684  |                    | 0.0532835097917099 |   |               |     |
| cycle      |                                         |                                                   | regulation of transcription involved in G1/S phase of mitotic cell |                   |                    |                    |   |               |     |

Tissue: whole\_Blood=>Lung

Type: asymmetric

Stable4\_20PerPair

SourceGene: MMP3(ENSG00000149968.7)  
 TargetGeneSet: SDHDP6 RP11 PPA2 TMC06 C6orf72 C8orf82 FBXL15 DDX23 TEP1  
 MPG SLC9A3R2 EIF3C ATP5D FAM108A1 ZNF358 FAM98C RABAC1 A1BG  
 GATA5  
 GOBPID Pvalue OddsRatio ExpCount Count Size Term  
 GO:0014067 1.11832549800475e-05 656.090909090909 0.00539755034253685  
 2 6 negative regulation of phosphatidylinositol 3-kinase cascade  
 Tissue: Lung=>whole\_Blood Type: asymmetric  
 SourceGene: MOG(ENSG00000204655.7)  
 TargetGeneSet: MTND1P23 MTND2P28 RP11 RGS4 ARID4B-IT1  
 VSNL1 POU3F3 KIF1A ARPP21 CAMKV GABRB2 SNAP91 KCND2 DIRAS2 OPCML  
 PRMT8 KCNC2 HIGD1B DYNLL2 UNC13A SNAP25 FEM1AP1 CTA FRMPD4 PLP1  
 GRIA3 H2AFB2  
 GOBPID Pvalue OddsRatio ExpCount Count Size Term  
 Tissue: whole\_Blood=>Lung Type: asymmetric  
 SourceGene: PAMR1(ENSG00000149090.7)  
 TargetGeneSet: RPS8 RP4 RPS7 UBC DUSP19 RPL32 RP11 EPHB1  
 SLC30A9 SEPP1 DIMT1 TMEM14B HIST1H2BJ HIST1H2AG DPCR1 SEPT10P1  
 ZMYND11 RPL27A RPL4 FTLP14 GCSH RPS7P1 RPL19 TIMP2 RPS15 RPS5  
 DUSP18 CTA RPL10  
 GOBPID Pvalue OddsRatio ExpCount Count Size Term  
 GO:0006415 6.30555352061827e-17 136.24881291548 0.144834267524739 10  
 91 translational termination  
 GO:0006414 2.79796175290637e-16 116.056680161943 0.167116462528545  
 10 105 translational elongation  
 GO:0006614 2.79796175290637e-16 116.056680161943 0.167116462528545  
 10 105 SRP-dependent cotranslational protein targeting to membrane  
 GO:0006613 3.08687413255169e-16 114.839743589744 0.168708047885959  
 10 106 cotranslational protein targeting to membrane  
 GO:0045047 3.08687413255169e-16 114.839743589744 0.168708047885959  
 10 106 protein targeting to ER  
 GO:0072599 3.08687413255169e-16 114.839743589744 0.168708047885959  
 10 106 establishment of protein localization to endoplasmic reticulum  
 GO:0070972 9.35135241104897e-16 101.994301994302 0.187807072174936  
 10 118 protein localization to endoplasmic reticulum  
 GO:0000184 1.02008682585083e-15 101.051517290049 0.189398657532351  
 10 119 nuclear-transcribed mRNA catabolic process, nonsense-mediated decay  
 GO:0019080 1.16958569994575e-14 77.9432624113475 0.240329388969621  
 10 151 viral genome expression  
 GO:0019083 1.16958569994575e-14 77.9432624113475 0.240329388969621  
 10 151 viral transcription  
 GO:0006413 1.25091808835343e-14 77.3889490790899 0.241920974327036  
 10 152 translational initiation  
 GO:0006612 1.33729070090369e-14 76.8423883808499 0.243512559684451  
 10 153 protein targeting to membrane  
 GO:0043624 1.33729070090369e-14 76.8423883808499 0.243512559684451  
 10 153 cellular protein complex disassembly  
 GO:0043241 1.85483238175808e-14 74.2203742203742 0.251470486471524  
 10 158 protein complex disassembly  
 GO:0000956 3.6731013503907e-14 69.0324141267537 0.268977925403086  
 10 169 nuclear-transcribed mRNA catabolic process  
 GO:0034623 4.93531947415089e-14 66.9043151969981 0.27693585219016  
 10 174 cellular macromolecular complex disassembly  
 GO:0006402 6.21163297175937e-14 65.2930402930403 0.283302193619819  
 10 178 mRNA catabolic process  
 GO:0032984 6.57374934802155e-14 64.9021392808375 0.284893778977233  
 10 179 macromolecular complex disassembly  
 GO:0071845 1.52770223589797e-13 47.5289987789988 0.452010241505778  
 11 284 cellular component disassembly at cellular level  
 GO:0022411 1.78117443726344e-13 46.8294223826715 0.458376582935437  
 11 288 cellular component disassembly  
 GO:0072594 2.45722623718009e-13 56.4393338620143 0.324683412912601  
 10 204 establishment of protein localization to organelle

Stable4\_20PerPair

|                       |                                  |                                                                     |                    |          |          |          |         |         |       |      |
|-----------------------|----------------------------------|---------------------------------------------------------------------|--------------------|----------|----------|----------|---------|---------|-------|------|
| GO:0006401            | 2.58110034705589e-13             | 56.1459566074951                                                    | 0.326274998270016  |          |          |          |         |         |       |      |
| 10                    | 205                              | RNA catabolic process                                               |                    |          |          |          |         |         |       |      |
| GO:0019058            | 8.55234752637089e-13             | 49.4500522102332                                                    | 0.367656217562798  |          |          |          |         |         |       |      |
| 10                    | 231                              | viral infectious cycle                                              |                    |          |          |          |         |         |       |      |
| GO:0022415            | 2.78571752229051e-12             | 43.6246153846154                                                    | 0.413812192927825  |          |          |          |         |         |       |      |
| 10                    | 260                              | viral reproductive process                                          |                    |          |          |          |         |         |       |      |
| GO:0016032            | 6.31199390872842e-10             | 24.397348683063                                                     | 0.717804996194035  | 10       |          |          |         |         |       |      |
| 451                   |                                  | viral reproduction                                                  |                    |          |          |          |         |         |       |      |
| GO:0033365            | 1.00237370241577e-09             | 23.2015284931052                                                    | 0.752819874057159  |          |          |          |         |         |       |      |
| 10                    | 473                              | protein localization to organelle                                   |                    |          |          |          |         |         |       |      |
| GO:0006605            | 1.02311616145228e-09             | 23.1498673740053                                                    | 0.754411459414573  |          |          |          |         |         |       |      |
| 10                    | 474                              | protein targeting                                                   |                    |          |          |          |         |         |       |      |
| GO:0042274            | 2.82937347018751e-06             | 144.13                                                              | 0.0286485364334648 | 3        | 18       |          |         |         |       |      |
|                       |                                  | ribosomal small subunit biogenesis                                  |                    |          |          |          |         |         |       |      |
| Tissue: whole_Blood=> | Lung                             | Type: asymmetric                                                    |                    |          |          |          |         |         |       |      |
| SourceGene:           | RAB1C(ENSG00000233111.1)         |                                                                     |                    |          |          |          |         |         |       |      |
| TargetGeneSet:        | TMEM222                          | RPS8                                                                | RP11               | TMEM42   | LTF      | HCLS1    | SPARCL1 | CCNA2   |       |      |
| HMGB2                 | CTD                              | HMMR                                                                | BOD1               | BTNL9    | KIFC1    | CTSB     | CDCA2   | ESCO2   | IL2RA |      |
| RBM17                 | ITGA8                            | SRGN                                                                | CCDC147            | NCAPD2   | C12orf57 | CMAS     | AGAP2   | TMCC3   |       |      |
| SELPLG                | RP1                              | NUSAP1                                                              | BLM                | SLC5A2   | NKD1     | TRAPPC2L | RPL19   | BRCA1   |       |      |
| RPS7P11               | RFNG                             | SLC16A3                                                             | RPL18              | RPL28    | RPS5     | TRIB3    | MYLK2   | CBLN4   | MIOX  | BEX2 |
| GOBPID                | Pvalue                           | OddsRatio                                                           | ExpCount           | Count    | Size     | Term     |         |         |       |      |
| GO:0006415            | 3.77538272921322e-06             | 25.2413671599718                                                    | 0.239291398519134  |          |          |          |         |         |       |      |
| 5                     | 91                               | translational termination                                           |                    |          |          |          |         |         |       |      |
| GO:0006414            | 7.63268820961873e-06             | 21.6863636363636                                                    | 0.27610545982977   |          |          |          |         |         |       |      |
| 5                     | 105                              | translational elongation                                            |                    |          |          |          |         |         |       |      |
| GO:0006614            | 7.63268820961873e-06             | 21.6863636363636                                                    | 0.27610545982977   |          |          |          |         |         |       |      |
| 5                     | 105                              | SRP-dependent cotranslational protein targeting to membrane         |                    |          |          |          |         |         |       |      |
| GO:0006613            | 7.99528987057395e-06             | 21.4701470147015                                                    | 0.278735035637672  |          |          |          |         |         |       |      |
| 5                     | 106                              | cotranslational protein targeting to membrane                       |                    |          |          |          |         |         |       |      |
| GO:0045047            | 7.99528987057395e-06             | 21.4701470147015                                                    | 0.278735035637672  |          |          |          |         |         |       |      |
| 5                     | 106                              | protein targeting to ER                                             |                    |          |          |          |         |         |       |      |
| GO:0072599            | 7.99528987057395e-06             | 21.4701470147015                                                    | 0.278735035637672  |          |          |          |         |         |       |      |
| 5                     | 106                              | establishment of protein localization to endoplasmic reticulum      |                    |          |          |          |         |         |       |      |
| GO:0070972            | 1.34915910055372e-05             | 19.1740412979351                                                    | 0.310289945332503  |          |          |          |         |         |       |      |
| 5                     | 118                              | protein localization to endoplasmic reticulum                       |                    |          |          |          |         |         |       |      |
| GO:0000184            | 1.40565085719009e-05             | 19.0045188729399                                                    | 0.312919521140405  |          |          |          |         |         |       |      |
| 5                     | 119                              | nuclear-transcribed mRNA catabolic process, nonsense-mediated decay |                    |          |          |          |         |         |       |      |
| Tissue: whole_Blood=> | Lung                             | Type: asymmetric                                                    |                    |          |          |          |         |         |       |      |
| SourceGene:           | RP11-369K16.1(ENSG00000251468.2) |                                                                     |                    |          |          |          |         |         |       |      |
| TargetGeneSet:        | ANAPC10P1                        | PMF1                                                                | NUF2               | TNFSF13B | CCDC150  | RP11     |         |         |       |      |
| CEP19                 | CDC25C                           | RPL29P14                                                            | FTH1P15            | PBK      | ESPL1    | TIMELESS | RFC3    | PRC1    |       |      |
| CTD                   | AURKB                            | UNK                                                                 | AP5S1              | GSTT1    | NFAM1    | SCML2    | VDAC1P6 | RBMY1KP |       |      |
| GOBPID                | Pvalue                           | OddsRatio                                                           | ExpCount           | Count    | Size     | Term     |         |         |       |      |
| GO:0000280            | 2.50766476846914e-08             | 35.9515306122449                                                    | 0.363296657670749  |          |          |          |         |         |       |      |
| 7                     | 350                              | nuclear division                                                    |                    |          |          |          |         |         |       |      |
| GO:0007067            | 2.50766476846914e-08             | 35.9515306122449                                                    | 0.363296657670749  |          |          |          |         |         |       |      |
| 7                     | 350                              | mitosis                                                             |                    |          |          |          |         |         |       |      |
| GO:0000087            | 3.04437575889836e-08             | 34.9082861189802                                                    | 0.373676562175628  |          |          |          |         |         |       |      |
| 7                     | 360                              | M phase of mitotic cell cycle                                       |                    |          |          |          |         |         |       |      |
| GO:0048285            | 3.67569432426881e-08             | 33.922520661157                                                     | 0.384056466680507  | 7        |          |          |         |         |       |      |
| 370                   |                                  | organelle fission                                                   |                    |          |          |          |         |         |       |      |
| GO:0051301            | 1.44801125328211e-07             | 27.510393258427                                                     | 0.469171683620511  | 7        |          |          |         |         |       |      |
| 452                   |                                  | cell division                                                       |                    |          |          |          |         |         |       |      |
| GO:0007059            | 1.06022401963643e-05             | 38.2352941176471                                                    | 0.1453186630683    | 4        |          |          |         |         |       |      |
| 140                   |                                  | chromosome segregation                                              |                    |          |          |          |         |         |       |      |
| Tissue: whole_Blood=> | Lung                             | Type: cluster                                                       |                    |          |          |          |         |         |       |      |
| SourceGene:           | SORT1(ENSG00000134243.7)         |                                                                     |                    |          |          |          |         |         |       |      |
| TargetGeneSet:        | TMEM51                           | SPEN                                                                | RP11               | METTL13  | GPR137B  | ERO1LB   | SCN7A   | CERS6   |       |      |
| GOLGB1                | KLF15                            | C4orf50                                                             | SPARCL1            | LRRRC16A | RP3      | KHDRBS2  | HINT3   | ADCY1   | UPP1  | POP1 |
| AQP7P3                | RHOBTB1                          | MICU1                                                               | SLC16A12           | TMEM133  | ITFG2    | METTL7A  | IRAK3   | NT5DC3  |       |      |
| RAB35                 | FLT3                             | FOXO1                                                               | DNAJC3             | PCNX     | MGA      | CHD9     | MT1L    | MT1M    | MT1A  | MT1X |
| GLOD4                 | TNFSF12                          | PNMT                                                                | MTMR4              | NOTCH3   | HIF3A    | SAMHD1   | TTPAL   | NCOA3   | KCNB1 | H1FO |

Stable4\_20PerPair

| MAGED2     | RP6    | MAGEC3    |                                                             |                  |                  |                     |          |           |          |             |          |          |
|------------|--------|-----------|-------------------------------------------------------------|------------------|------------------|---------------------|----------|-----------|----------|-------------|----------|----------|
| GOBPID     | Pvalue | OddsRatio | ExpCount                                                    | Count            | Size             | Term                |          |           |          |             |          |          |
| GO:0071294 | 3      | 12        | 3.07587567160006e-06                                        | 145.515151515152 |                  | 0.0298941249740502  |          |           |          |             |          |          |
|            |        |           | cellular response to zinc ion                               |                  |                  |                     |          |           |          |             |          |          |
|            |        |           | Tissue: Lung=>Whole_Blood Type: asymmetric                  |                  |                  |                     |          |           |          |             |          |          |
|            |        |           | SourceGene: WDR45L(ENSG00000141580.10)                      |                  |                  |                     |          |           |          |             |          |          |
|            |        |           | TargetGeneSet:                                              | MTND1P23         | MTND2P28         | SPSB1               | ANGPTL7  | RP11      | BCAN     |             |          |          |
|            |        |           | KCNJ10                                                      | HNRNPU           | HADH             | CIDEA               | FOXP1    | TAGLN3    | AP2M1    | ADIPOQ      | BRD9     | GABRA1   |
|            |        |           | GABRP                                                       | HIST1H4H         |                  | COL12A1             | HRCT1    | DPP7      | TPP1     | MTRNR2L8    |          | C11orf31 |
|            |        |           | PACS1                                                       | TSKU             | CRABP1           | RP1                 | IGFBP6   | PCBP2     | NME3     | CTA         | NFATC3   | SERPINF1 |
|            |        |           | AP2B1                                                       | UBTF             | GFAP             | ARL16               | SMARCA4  | NUCB1-AS1 |          | ADAM33      | WISP2    | MYH9     |
|            |        |           | EIF2S3                                                      | NONO             | USP26            |                     |          |           |          |             |          |          |
| GOBPID     | Pvalue | OddsRatio | ExpCount                                                    | Count            | Size             | Term                |          |           |          |             |          |          |
| GO:0050688 | 4      | 57        | 1.45278098400454e-05                                        | 31.8756936736959 |                  | 0.149885821050446   |          |           |          |             |          |          |
|            |        |           | regulation of defense response to virus                     |                  |                  |                     |          |           |          |             |          |          |
|            |        |           | Tissue: Whole_Blood=>Lung Type: cluster                     |                  |                  |                     |          |           |          |             |          |          |
|            |        |           | SourceGene: all_source                                      |                  |                  |                     |          |           |          |             |          |          |
|            |        |           | TargetGeneSet:                                              | ARL6IP5          | SEC31B           | DYNLL2              | CDC42SE1 | PSTPIP2   | CATSPER1 | RP11        |          |          |
|            |        |           | OXT                                                         | SORT1            | WDR69            | UCN                 | C9orf114 |           |          |             |          |          |
| GOBPID     | Pvalue | OddsRatio | ExpCount                                                    | Count            | Size             | Term                |          |           |          |             |          |          |
| GO:0042756 | 2      | 8         | 1.2041283328032e-05                                         | 601.458333333333 |                  | 0.00553594906926856 |          |           |          |             |          |          |
|            |        |           | drinking behavior                                           |                  |                  |                     |          |           |          |             |          |          |
|            |        |           | Tissue: Heart_Left_Ventricle=>Muscle_Skeletal Type: cluster |                  |                  |                     |          |           |          |             |          |          |
|            |        |           | SourceGene: CTD-2292M16.7(ENSG00000258459.1)                |                  |                  |                     |          |           |          |             |          |          |
|            |        |           | TargetGeneSet:                                              | C1orf130         | ZCCHC17          | FABP3               | MRPS15   | DPH2      | BTBD8    | ANKRD20A14P |          |          |
|            |        |           | ATP1A2                                                      | TIMM17A          | SOX13            | EML4                | FBXO11   | MDH1      | SLC4A4   | RPIA        | COX5B    | TXNDC9   |
|            |        |           | C2orf29                                                     | RANBP2           | NDUFB3           | FAM117B             | THUMPD3  | CRTAP     | RP11     | ACVR2B      | MYL3     | NDUFB4   |
|            |        |           | SRPRB                                                       | MRPL47           | MRPS18C          | CNGB1               | NDUFC1   | CMBL      | JMY      | TMEM167A    |          | TTC37    |
|            |        |           | UQCRCQ                                                      | CNOT6            | MRPS18B          | RRP36               | CUL7     | PHF3      | SNAP91   | BACH2       | RTN4IP1  | WISP3    |
|            |        |           | NDUFA4                                                      | GGCT             | CALU             | MRPS33              | MLL3     | TNKS      | VPS37A   | MRPL15      | UQCRB    | COX6C    |
|            |        |           | C9orf80                                                     | C9orf91          | MRPL41           | SVIL                | PTPN20C  | MYPN      | PPIF     | MMS19       | BCCIP    | TMX2     |
|            |        |           | LTBP2                                                       | NUMA1            | SPCS2            | TMEM126A            |          | C11orf73  |          | ATP5L       | DNM1L    | DUSP6    |
|            |        |           | SLC25A3                                                     | SRRM4            | SLC25A15         |                     | RALGAPA1 |           | GLRX5    | DYNC1H1     | FAM96A   | UACA     |
|            |        |           | COX5A                                                       | ETFA             | TSC2             | PKD1                | 7SK      | ZNF771    | CIAPIN1  | COQ9        | COX4NB   | C1QBP    |
|            |        |           | SRP68P3                                                     | SUPT6H           | ETV4             | MRPL27              | TACO1    | ABCA5     | ATP5H    | SLC25A19    |          | WDR45L   |
|            |        |           | NDUFV2                                                      | NAPG             | C18orf32         |                     | ACAA2    | NEDD4L    | ABCA7    | UQCR11      | ITGB1BP3 |          |
|            |        |           | TIMM44                                                      | GADD45GIP1       |                  | ILVBL               | COX6B1   | RYR1      | EIF3K    | MRPS12      | TBC1D17  | SNORA51  |
|            |        |           | TTC28                                                       | UQCR10           | SLC16A8          | RPS19BP1            |          | NDUFA6    | CLCN4    | DMD         | SLC9A7   | RP1      |
|            |        |           | RAP2C                                                       | MCF2             | FUNDC2           |                     |          |           |          |             |          |          |
| GOBPID     | Pvalue | OddsRatio | ExpCount                                                    | Count            | Size             | Term                |          |           |          |             |          |          |
| GO:0022904 | 17     | 96        | 5.09756556714145e-19                                        | 33.0004083299306 |                  | 0.73074527714345    |          |           |          |             |          |          |
|            |        |           | respiratory electron transport chain                        |                  |                  |                     |          |           |          |             |          |          |
| GO:0045333 | 18     | 142       | 2.24818676451834e-17                                        | 22.4321528751753 |                  | 1.08089405577469    |          |           |          |             |          |          |
|            |        |           | cellular respiration                                        |                  |                  |                     |          |           |          |             |          |          |
| GO:0022900 | 17     | 134       | 1.82875161660439e-16                                        | 22.2229574487639 |                  | 1.01999861601273    |          |           |          |             |          |          |
|            |        |           | electron transport chain                                    |                  |                  |                     |          |           |          |             |          |          |
| GO:0015980 | 307    |           | 1.59850933047265e-12                                        | 10.187996031746  | 2.33686250086499 | 19                  |          |           |          |             |          |          |
|            |        |           | energy derivation by oxidation of organic compounds         |                  |                  |                     |          |           |          |             |          |          |
| GO:0006091 | 20     | 428       | 6.56007166244477e-11                                        | 7.58877995642702 |                  | 3.25790602726455    |          |           |          |             |          |          |
|            |        |           | generation of precursor metabolites and energy              |                  |                  |                     |          |           |          |             |          |          |
| GO:0042773 | 8      | 47        | 2.14085965668616e-09                                        | 28.7621920563097 |                  | 0.357760708601481   |          |           |          |             |          |          |
|            |        |           | ATP synthesis coupled electron transport                    |                  |                  |                     |          |           |          |             |          |          |
| GO:0042775 | 8      | 47        | 2.14085965668616e-09                                        | 28.7621920563097 |                  | 0.357760708601481   |          |           |          |             |          |          |
|            |        |           | mitochondrial ATP synthesis coupled electron transport      |                  |                  |                     |          |           |          |             |          |          |
| GO:0006119 | 8      | 58        | 1.2177092509027e-08                                         | 22.4172549019608 |                  | 0.441491938274168   |          |           |          |             |          |          |
|            |        |           | oxidative phosphorylation                                   |                  |                  |                     |          |           |          |             |          |          |
| GO:0006120 | 6      | 36        | 2.74257268012291e-07                                        | 27.5211538461538 |                  | 0.274029478928794   |          |           |          |             |          |          |
|            |        |           | mitochondrial electron transport, NADH to ubiquinone        |                  |                  |                     |          |           |          |             |          |          |
|            |        |           | Tissue: Heart_Left_Ventricle=>Muscle_Skeletal Type: cluster |                  |                  |                     |          |           |          |             |          |          |
|            |        |           | SourceGene: DEFB1(ENSG00000164825.3)                        |                  |                  |                     |          |           |          |             |          |          |
|            |        |           | TargetGeneSet:                                              | RPL22            | C1QA             | C1QB                | RPS8     | RP11      | FNBP1L   | TKT         | RGL1     | SWT1     |
|            |        |           | SRGAP3                                                      | SPTBN1           | UBR3             | FBLN2               | RPL29    | ABI3BP    | RPL24    | PSMD2       | RPL35A   | RPL34    |
|            |        |           | RPS3A                                                       | CTD              | PCDHB10          | CSF1R               | CTB      | SLIT1     | ADAMTS2  | GFPT2       | F13A1    | RPL15P3  |



| Stable4_20PerPair |        |           |                                                                     |                  |                   |       |       |                   |         |      |
|-------------------|--------|-----------|---------------------------------------------------------------------|------------------|-------------------|-------|-------|-------------------|---------|------|
| RPS10             | RPL10A | CLPS      | NT5E                                                                | MRPS12           | FNDC1             | GPNMB | TRIP6 | IRF5              | RPL7    |      |
| MATN2             | NTRK2  | RPL12     | RPL7A                                                               | MRC1             | ALOX5             | TACR2 | MYOF  | ZNF195            | RPL27A  |      |
| RPS25             | CD4    | PFDN5     | LRP1                                                                | GLIPR1           | RPL6              | GPC6  | U6    | RSL24D1           | RPS3AP6 | CILP |
| CORO2B            | ISLR   | ANPEP     | LRRK1                                                               | USP7             | PIEZO1            | RPL13 | RPL26 | PSMD3             | CHAD    |      |
| TIMP2             | RPL17  | PRTN3     | HRC                                                                 | WISP2            | ARSD-AS1          |       | GPR64 | RPS4X             | DOCK11  | ELF4 |
| GOBPID            | Pvalue | OddsRatio | ExpCount                                                            | Count            | Size              | Term  |       |                   |         |      |
| GO:0006415        | 19     | 91        | 1.87298754884005e-26                                                | 71.2350628930818 |                   |       |       | 0.453394228773095 |         |      |
|                   |        |           | translational termination                                           |                  |                   |       |       |                   |         |      |
| GO:0006414        | 19     | 105       | 3.60489204692822e-25                                                | 59.5802983764809 |                   |       |       | 0.523147187045879 |         |      |
|                   |        |           | translational elongation                                            |                  |                   |       |       |                   |         |      |
| GO:0006614        | 19     | 105       | 3.60489204692822e-25                                                | 59.5802983764809 |                   |       |       | 0.523147187045879 |         |      |
|                   |        |           | SRP-dependent cotranslational protein targeting to membrane         |                  |                   |       |       |                   |         |      |
| GO:0006613        | 19     | 106       | 4.3767684978085e-25                                                 | 58.8913467794405 |                   |       |       | 0.528129541208221 |         |      |
|                   |        |           | cotranslational protein targeting to membrane                       |                  |                   |       |       |                   |         |      |
| GO:0045047        | 19     | 106       | 4.3767684978085e-25                                                 | 58.8913467794405 |                   |       |       | 0.528129541208221 |         |      |
|                   |        |           | protein targeting to ER                                             |                  |                   |       |       |                   |         |      |
| GO:0072599        | 19     | 106       | 4.3767684978085e-25                                                 | 58.8913467794405 |                   |       |       | 0.528129541208221 |         |      |
|                   |        |           | establishment of protein localization to endoplasmic reticulum      |                  |                   |       |       |                   |         |      |
| GO:0070972        | 19     | 118       | 3.87288690757928e-24                                                | 51.7095483133219 |                   |       |       | 0.587917791156321 |         |      |
|                   |        |           | protein localization to endoplasmic reticulum                       |                  |                   |       |       |                   |         |      |
| GO:0000184        | 19     | 119       | 4.59256530536703e-24                                                | 51.1888679245283 |                   |       |       | 0.592900145318663 |         |      |
|                   |        |           | nuclear-transcribed mRNA catabolic process, nonsense-mediated decay |                  |                   |       |       |                   |         |      |
| GO:0006612        | 20     | 153       | 1.70868344544392e-23                                                | 41.1972238288028 |                   |       |       | 0.762300186838281 |         |      |
|                   |        |           | protein targeting to membrane                                       |                  |                   |       |       |                   |         |      |
| GO:0043624        | 20     | 153       | 1.70868344544392e-23                                                | 41.1972238288028 |                   |       |       | 0.762300186838281 |         |      |
|                   |        |           | cellular protein complex disassembly                                |                  |                   |       |       |                   |         |      |
| GO:0043241        | 158    |           | 3.33498848053864e-23                                                | 39.690635451505  | 0.78721195764999  |       |       |                   | 20      |      |
|                   |        |           | protein complex disassembly                                         |                  |                   |       |       |                   |         |      |
| GO:0034623        | 174    |           | 2.44910218365854e-22                                                | 35.526973026973  | 0.866929624247457 |       |       |                   |         | 20   |
|                   |        |           | cellular macromolecular complex disassembly                         |                  |                   |       |       |                   |         |      |
| GO:0032984        | 20     | 179       | 4.38389985809079e-22                                                | 34.3976777939042 |                   |       |       | 0.891841395059165 |         |      |
|                   |        |           | macromolecular complex disassembly                                  |                  |                   |       |       |                   |         |      |
| GO:0019080        | 151    |           | 5.30012675642439e-22                                                | 38.692538593482  | 0.752335478513598 |       |       |                   |         | 19   |
|                   |        |           | viral genome expression                                             |                  |                   |       |       |                   |         |      |
| GO:0019083        | 151    |           | 5.30012675642439e-22                                                | 38.692538593482  | 0.752335478513598 |       |       |                   |         | 19   |
|                   |        |           | viral transcription                                                 |                  |                   |       |       |                   |         |      |
| GO:0006413        | 19     | 152       | 6.03599514109242e-22                                                | 38.3989218328841 |                   |       |       | 0.757317832675939 |         |      |
|                   |        |           | translational initiation                                            |                  |                   |       |       |                   |         |      |
| GO:0000956        | 19     | 169       | 4.81784431727102e-21                                                | 34.0064150943396 |                   |       |       | 0.842017853435748 |         |      |
|                   |        |           | nuclear-transcribed mRNA catabolic process                          |                  |                   |       |       |                   |         |      |
| GO:0071845        | 22     | 284       | 9.37713762928254e-21                                                | 23.7079389312977 |                   |       |       | 1.41498858210504  |         |      |
|                   |        |           | cellular component disassembly at cellular level                    |                  |                   |       |       |                   |         |      |
| GO:0022411        | 22     | 288       | 1.27352754784725e-20                                                | 23.3448120300752 |                   |       |       | 1.43491799875441  |         |      |
|                   |        |           | cellular component disassembly                                      |                  |                   |       |       |                   |         |      |
| GO:0006402        | 178    |           | 1.32172620845689e-20                                                | 32.061231755073  | 0.886859040896824 |       |       |                   |         | 19   |
|                   |        |           | mRNA catabolic process                                              |                  |                   |       |       |                   |         |      |
| GO:0019058        | 20     | 231       | 7.75447417905815e-20                                                | 25.8257382427999 |                   |       |       | 1.15092381150093  |         |      |
|                   |        |           | viral infectious cycle                                              |                  |                   |       |       |                   |         |      |
| GO:0072594        | 19     | 204       | 1.83307320726844e-19                                                | 27.5049464558899 |                   |       |       | 1.01640024911771  |         |      |
|                   |        |           | establishment of protein localization to organelle                  |                  |                   |       |       |                   |         |      |
| GO:0006401        | 19     | 205       | 2.01319926029769e-19                                                | 27.3551430310408 |                   |       |       | 1.02138260328005  |         |      |
|                   |        |           | RNA catabolic process                                               |                  |                   |       |       |                   |         |      |
| GO:0022415        | 20     | 260       | 8.22254859659035e-19                                                | 22.6586538461538 |                   |       |       | 1.29541208220884  |         |      |
|                   |        |           | viral reproductive process                                          |                  |                   |       |       |                   |         |      |
| GO:0016032        | 22     | 451       | 1.91219579250783e-16                                                | 14.3076923076923 |                   |       |       | 2.24704172721611  |         |      |
|                   |        |           | viral reproduction                                                  |                  |                   |       |       |                   |         |      |
| GO:0033365        | 21     | 473       | 6.926931938195e-15                                                  | 12.6872722540344 |                   |       |       | 2.35665351878763  |         |      |
|                   |        |           | protein localization to organelle                                   |                  |                   |       |       |                   |         |      |
| GO:0006605        | 21     | 474       | 7.22293049273841e-15                                                | 12.6583560576548 |                   |       |       | 2.36163587294997  |         |      |
|                   |        |           | protein targeting                                                   |                  |                   |       |       |                   |         |      |
| GO:0071843        | 9      | 239       | 2.73842229720722e-06                                                | 8.78819875776398 |                   |       |       | 1.19078264479967  |         |      |
|                   |        |           | cellular component biogenesis at cellular level                     |                  |                   |       |       |                   |         |      |
| GO:0042254        |        |           | 9.04735715293693e-06                                                | 10.7972914409534 |                   |       |       | 0.742370770188914 |         |      |

Stable4\_20PerPair

7 149 ribosome biogenesis  
 GO:0022613 1.54948743400183e-05 8.15783410138249 1.12102968652688  
 8 225 ribonucleoprotein complex biogenesis  
 Tissue: Heart\_Left\_Ventricle=>Muscle\_Skeletal Type: asymmetric  
 SourceGene: ELM01-AS1(ENSG00000224101.1)  
 TargetGeneSet: SLC2A5 MIR186 MFSD2B SFTPB RAX VILL PILRA SFTPC  
 FAM163B LRRC18 SFTPA2 SFTPA1 SFTPD HBB CTD HBA1 RP3 ALAS2  
 GOBPID Pvalue OddsRatio ExpCount Count Size Term  
 GO:0007585 5.63941214389412e-10 195.54347826087 0.0458791779115632 5  
 51 respiratory gaseous exchange  
 GO:0071732 1.56486111333871e-05 524.836363636364 0.00629714206629299  
 2 7 cellular response to nitric oxide  
 Tissue: Heart\_Left\_Ventricle=>Muscle\_Skeletal Type: asymmetric  
 SourceGene: ENSG00000232970.1  
 TargetGeneSet: RP11 TTLL7 GBP5 CSDE1 LCE1A NR1I3 EBF3 DYSF  
 COX5B FASTKD1 C2orf88 CCDC150 CCDC58 PLS1 MB21D2 HAUS3 SDHA SDHAP3  
 COX7C C6orf136 UQCRB PTPDC1 OLFML2A MRPL41 VDAC2 COMTD1 GOT1  
 FBXL15 NRAP ARNTL ATP5L USP5 B4GALNT1 SLC25A3 C15orf57  
 COX5A IDH3A PAQR4 C16orf62 UQCRC2 MLYCD RILP ASPA PSMD11  
 C18orf25 EIF3K RP4 SLMO2 DDT KIAA0930 USP11 RPL23AP83  
 GOBPID Pvalue OddsRatio ExpCount Count Size Term  
 GO:0045333 3.75947048454087e-11 37.1737998843262 0.343920835928309  
 9 142 cellular respiration  
 GO:0022904 2.64221223061685e-09 40.2443820224719 0.23250986090928  
 7 96 respiratory electron transport chain  
 GO:0022900 2.7271926015933e-08 28.1279527559055 0.32454501418587  
 7 134 electron transport chain  
 GO:0015980 3.40707675026016e-08 16.3993288590604 0.743547159366134  
 9 307 energy derivation by oxidation of organic compounds  
 GO:0006091 4.42283451323363e-08 13.3952153110048 1.03660646322054  
 10 428 generation of precursor metabolites and energy  
 GO:0009060 3.02273220774707e-06 48.8217317487267 0.10172306414781  
 4 42 aerobic respiration  
 Tissue: Muscle\_skeletal=>Heart\_Left\_Ventricle Type: asymmetric  
 SourceGene: ENSG00000243454.1  
 TargetGeneSet: ZBTB48 COL24A1 BNIPL TRAPPC12-AS1 COL3A1 COL5A2 FILIP1L RP11  
 CCDC80 KIT PDE5A FAM198B LPCAT1 PCDHGC5 MAPK14 EPB41L2 NFE2L3 CTHRC1  
 COL14A1 OGN ASPN ECM2 ANKS6 COL5A1 CDH23 POLL LRRC55 LUM  
 DACT1 C17orf62 ZNF600 ZNF525 C20orf202 CDH26 CAPN6  
 GOBPID Pvalue OddsRatio ExpCount Count Size Term  
 GO:0030199 4.28224736216947e-09 111.762422360248 0.0639402117500519  
 5 33 collagen fibril organization  
 GO:0030198 1.81828795030155e-08 30.8852813852814 0.311950730053283  
 7 161 extracellular matrix organization  
 GO:0043062 1.89797129607994e-08 30.6838709677419 0.313888312227527  
 7 162 extracellular structure organization  
 Tissue: Muscle\_skeletal=>Heart\_Left\_Ventricle Type: asymmetric  
 SourceGene: ENSG00000256240.1  
 TargetGeneSet: PRPF38A MIR4426 NFU1 RPL37A RP11 RPS23 CTD TRIM27  
 ANKRD20A4 NDUFA8 RPS13 RPS29 RPL38 RPS21 GPM6B  
 GOBPID Pvalue OddsRatio ExpCount Count Size Term  
 GO:0006415 4.7286271313409e-11 168.870588235294 0.0755657047955159  
 6 91 translational termination  
 GO:0006414 1.13596912439202e-10 144.848484848485 0.0871911978409799  
 6 105 translational elongation  
 GO:0006614 1.13596912439202e-10 144.848484848485 0.0871911978409799  
 6 105 SRP-dependent cotranslational protein targeting to membrane  
 GO:0006613 1.20369630057904e-10 143.39 0.0880215902013702 6 106  
 cotranslational protein targeting to membrane  
 GO:0045047 1.20369630057904e-10 143.39 0.0880215902013702 6 106  
 protein targeting to ER  
 GO:0072599 1.20369630057904e-10 143.39 0.0880215902013702 6 106  
 establishment of protein localization to endoplasmic reticulum

Stable4\_20PerPair

|                                               |                                                                     |                  |                    |
|-----------------------------------------------|---------------------------------------------------------------------|------------------|--------------------|
| GO:0070972                                    | 2.31510341395467e-10                                                | 127.919642857143 | 0.0979862985260536 |
| 6 118                                         | protein localization to endoplasmic reticulum                       |                  |                    |
| GO:0000184                                    | 2.43715605442804e-10                                                | 126.778761061947 | 0.0988166908864438 |
| 6 119                                         | nuclear-transcribed mRNA catabolic process, nonsense-mediated decay |                  |                    |
| GO:0019080                                    | 1.03374025467577e-09                                                | 98.5793103448276 | 0.125389246418933  |
| 6 151                                         | viral genome expression                                             |                  |                    |
| GO:0019083                                    | 1.03374025467577e-09                                                | 98.5793103448276 | 0.125389246418933  |
| 6 151                                         | viral transcription                                                 |                  |                    |
| GO:0006413                                    | 1.07583659143465e-09                                                | 97.8972602739726 | 0.126219638779323  |
| 6 152                                         | translational initiation                                            |                  |                    |
| GO:0006612                                    | 1.11934651153124e-09                                                | 97.2244897959184 | 0.127050031139714  |
| 6 153                                         | protein targeting to membrane                                       |                  |                    |
| GO:0043624                                    | 1.11934651153124e-09                                                | 97.2244897959184 | 0.127050031139714  |
| 6 153                                         | cellular protein complex disassembly                                |                  |                    |
| GO:0043241                                    | 1.35943709635315e-09                                                | 93.9934210526316 | 0.131201992941665  |
| 6 158                                         | protein complex disassembly                                         |                  |                    |
| GO:0000956                                    | 2.04064203149548e-09                                                | 87.5828220858896 | 0.140336308905958  |
| 6 169                                         | nuclear-transcribed mRNA catabolic process                          |                  |                    |
| GO:0034623                                    | 2.43273019696167e-09                                                | 84.9464285714286 | 0.144488270707909  |
| 6 174                                         | cellular macromolecular complex disassembly                         |                  |                    |
| GO:0006402                                    | 2.78967451431039e-09                                                | 82.9476744186046 | 0.147809840149471  |
| 6 178                                         | mRNA catabolic process                                              |                  |                    |
| GO:0032984                                    | 2.885389111653e-09                                                  | 82.4624277456647 | 0.148640232509861  |
| 6 179                                         | macromolecular complex disassembly                                  |                  |                    |
| GO:0072594                                    | 6.33155322571186e-09                                                | 71.9242424242424 | 0.169400041519618  |
| 6 204                                         | establishment of protein localization to organelle                  |                  |                    |
| GO:0006401                                    | 6.52010748867559e-09                                                | 71.5577889447236 | 0.170230433880008  |
| 6 205                                         | RNA catabolic process                                               |                  |                    |
| GO:0019058                                    | 1.33344527646106e-08                                                | 63.1733333333333 | 0.191820635250156  |
| 6 231                                         | viral infectious cycle                                              |                  |                    |
| GO:0022415                                    | 2.70267879691018e-08                                                | 55.8464566929134 | 0.215902013701474  |
| 6 260                                         | viral reproductive process                                          |                  |                    |
| GO:0071845                                    | 4.57347393629197e-08                                                | 50.9388489208633 | 0.235831430350841  |
| 6 284                                         | cellular component disassembly at cellular level                    |                  |                    |
| GO:0022411                                    | 4.97033799076331e-08                                                | 50.2021276595745 | 0.239152999792402  |
| 6 288                                         | cellular component disassembly                                      |                  |                    |
| GO:0016032                                    | 7.04124660609916e-07                                                | 31.447191011236  | 0.374506954536018  |
| 451                                           | viral reproduction                                                  |                  | 6                  |
| GO:0033365                                    | 9.30996519068124e-07                                                | 29.9186295503212 | 0.392775586464605  |
| 6 473                                         | protein localization to organelle                                   |                  |                    |
| GO:0006605                                    | 9.42588157413463e-07                                                | 29.8525641025641 | 0.393605978824995  |
| 6 474                                         | protein targeting                                                   |                  |                    |
| Tissue: Muscle_skeletal=>Heart_Left_Ventricle | Type: asymmetric                                                    |                  |                    |
| SourceGene:                                   | HTR7(ENSG00000148680.10)                                            |                  |                    |
| TargetGeneSet:                                | RPL11 RP11 PSMD4 UBC GNLY EEF1B2 RPS3A BTF3 CTB                     |                  |                    |
| RPS10 COPS6                                   | RPL30 HAS2 PSMB7 URM1 GSTO1 TALDO1 RPLP2 RPS13                      |                  |                    |
| RPL14P1 CYP51P2                               | RPS3AP6 PSMB6 NLGN2 RPL23A RPL17 PSMC5 TTC39C ZNF121                |                  |                    |
| KANK2 ZNF69                                   | UBA52 RPL13A HSD17B10 CSAG1                                         |                  |                    |
| GOBPID                                        | Pvalue OddsRatio ExpCount Count Size Term                           |                  |                    |
| GO:0006414                                    | 8.79632144056685e-19                                                | 102.709677419355 | 0.21797799460245   |
| 12 105                                        | translational elongation                                            |                  |                    |
| GO:0006415                                    | 1.63837225706366e-17                                                | 103.783552631579 | 0.18891426198879   |
| 11 91                                         | translational termination                                           |                  |                    |
| GO:0006614                                    | 8.48006399289468e-17                                                | 88.2402015677492 | 0.21797799460245   |
| 11 105                                        | SRP-dependent cotranslational protein targeting to membrane         |                  |                    |
| GO:0006613                                    | 9.45049397256069e-17                                                | 87.3052631578947 | 0.220053975503425  |
| 11 106                                        | cotranslational protein targeting to membrane                       |                  |                    |
| GO:0045047                                    | 9.45049397256069e-17                                                | 87.3052631578947 | 0.220053975503425  |
| 11 106                                        | protein targeting to ER                                             |                  |                    |
| GO:0072599                                    | 9.45049397256069e-17                                                | 87.3052631578947 | 0.220053975503425  |
| 11 106                                        | establishment of protein localization to endoplasmic reticulum      |                  |                    |
| GO:0070972                                    | 3.20574582608876e-16                                                | 77.4490900147565 | 0.244965746315134  |
| 11 118                                        | protein localization to endoplasmic reticulum                       |                  |                    |

Stable4\_20PerPair

|            |                                                                                               |                           |                   |  |  |
|------------|-----------------------------------------------------------------------------------------------|---------------------------|-------------------|--|--|
| GO:0000184 | 3.5279711938347e-16                                                                           | 76.7266081871345          | 0.24704172721611  |  |  |
| 11 119     | nuclear-transcribed mRNA catabolic process,                                                   |                           |                   |  |  |
| GO:0016032 | 2.08323179173028e-15                                                                          | 32.0756880733945          | 0.936267386340046 |  |  |
| 15 451     | viral reproduction                                                                            |                           |                   |  |  |
| GO:0019080 | 5.16753494456863e-15                                                                          | 59.0567669172932          | 0.313473116047332 |  |  |
| 11 151     | viral genome expression                                                                       |                           |                   |  |  |
| GO:0019083 | 5.16753494456863e-15                                                                          | 59.0567669172932          | 0.313473116047332 |  |  |
| 11 151     | viral transcription                                                                           |                           |                   |  |  |
| GO:0006413 | 5.56390451368096e-15                                                                          | 58.6338185890258          | 0.315549096948308 |  |  |
| 11 152     | translational initiation                                                                      |                           |                   |  |  |
| GO:0006612 | 5.98762366075637e-15                                                                          | 58.2168272794663          | 0.317625077849284 |  |  |
| 11 153     | protein targeting to membrane                                                                 |                           |                   |  |  |
| GO:0043624 | 5.98762366075637e-15                                                                          | 58.2168272794663          | 0.317625077849284 |  |  |
| 11 153     | cellular protein complex disassembly                                                          |                           |                   |  |  |
| GO:0043241 | 8.57846919587909e-15                                                                          | 56.2169709989259          | 0.328004982354162 |  |  |
| 11 158     | protein complex disassembly                                                                   |                           |                   |  |  |
| GO:0000956 | 1.81720686333755e-14                                                                          | 52.2628247834777          | 0.350840772264895 |  |  |
| 11 169     | nuclear-transcribed mRNA catabolic process                                                    |                           |                   |  |  |
| GO:0034623 | 2.51352674312269e-14                                                                          | 50.6419115272845          | 0.361220676769774 |  |  |
| 11 174     | cellular macromolecular complex disassembly                                                   |                           |                   |  |  |
| GO:0006402 | 3.23563366621432e-14                                                                          | 49.4150646076269          | 0.369524600373677 |  |  |
| 11 178     | mRNA catabolic process                                                                        |                           |                   |  |  |
| GO:0032984 | 3.44329372861052e-14                                                                          | 49.1174812030075          | 0.371600581274652 |  |  |
| 11 179     | macromolecular complex disassembly                                                            |                           |                   |  |  |
| GO:0072594 | 1.46307605867581e-13                                                                          | 42.6801199890919          | 0.423500103799045 |  |  |
| 11 204     | establishment of protein localization to organelle                                            |                           |                   |  |  |
| GO:0006401 | 1.54414914668809e-13                                                                          | 42.4571351058058          | 0.425576084700021 |  |  |
| 11 205     | RNA catabolic process                                                                         |                           |                   |  |  |
| GO:0019058 | 5.73980054119701e-13                                                                          | 37.3710526315789          | 0.479551588125389 |  |  |
| 11 231     | viral infectious cycle                                                                        |                           |                   |  |  |
| GO:0022415 | 2.09096768632073e-12                                                                          | 32.9511731135067          | 0.539755034253685 |  |  |
| 11 260     | viral reproductive process                                                                    |                           |                   |  |  |
| GO:0071845 | 5.46196938724066e-12                                                                          | 30.0034702139965          | 0.589578575877102 |  |  |
| 11 284     | cellular component disassembly at cellular level                                              |                           |                   |  |  |
| GO:0022411 | 6.35672814117802e-12                                                                          | 29.5618468554057          | 0.597882499481005 |  |  |
| 11 288     | cellular component disassembly                                                                |                           |                   |  |  |
| GO:2000045 | 1.02214241136263e-09                                                                          | 47.4021739130435          | 0.205522109196595 |  |  |
| 7 99       | regulation of G1/S transition of mitotic cell cycle                                           |                           |                   |  |  |
| GO:0033365 | 1.28085356945784e-09                                                                          | 17.4924812030075          | 0.981938966161511 |  |  |
| 11 473     | protein localization to organelle                                                             |                           |                   |  |  |
| GO:0006605 | 1.30966144978202e-09                                                                          | 17.4534500397863          | 0.984014947062487 |  |  |
| 11 474     | protein targeting                                                                             |                           |                   |  |  |
| GO:0006977 | 3.91936183998244e-09                                                                          | 59.8375 0.137014739464397 | 6 66              |  |  |
|            | DNA damage response, signal transduction by p53 class mediator resulting in cell cycle arrest |                           |                   |  |  |
| GO:0072413 | 3.91936183998244e-09                                                                          | 59.8375 0.137014739464397 | 6 66              |  |  |
|            | signal transduction involved in mitotic cell cycle checkpoint                                 |                           |                   |  |  |
| GO:0072431 | 3.91936183998244e-09                                                                          | 59.8375 0.137014739464397 | 6 66              |  |  |
|            | signal transduction involved in mitotic cell cycle G1/S transition DNA damage checkpoint      |                           |                   |  |  |
| GO:0072474 | 3.91936183998244e-09                                                                          | 59.8375 0.137014739464397 | 6 66              |  |  |
|            | signal transduction involved in mitotic cell cycle G1/S checkpoint                            |                           |                   |  |  |
| GO:0051436 | 4.29873094196168e-09                                                                          | 58.8524590163934          | 0.139090720365373 |  |  |
| 6 67       | negative regulation of ubiquitin-protein ligase activity involved in mitotic cell cycle       |                           |                   |  |  |
| GO:0072401 | 4.29873094196168e-09                                                                          | 58.8524590163934          | 0.139090720365373 |  |  |
| 6 67       | signal transduction involved in DNA integrity checkpoint                                      |                           |                   |  |  |
| GO:0072404 | 4.29873094196168e-09                                                                          | 58.8524590163934          | 0.139090720365373 |  |  |
| 6 67       | signal transduction involved in G1/S transition checkpoint                                    |                           |                   |  |  |
| GO:0072422 | 4.29873094196168e-09                                                                          | 58.8524590163934          | 0.139090720365373 |  |  |
| 6 67       | signal transduction involved in DNA damage checkpoint                                         |                           |                   |  |  |
| GO:0072395 | 4.70801029401529e-09                                                                          | 57.8991935483871          | 0.141166701266348 |  |  |
| 6 68       | signal transduction involved in cell cycle checkpoint                                         |                           |                   |  |  |

Stable4\_20PerPair

|                                                                                                 |                                                                                                |                  |                   |                   |    |
|-------------------------------------------------------------------------------------------------|------------------------------------------------------------------------------------------------|------------------|-------------------|-------------------|----|
| GO:0051352                                                                                      | 6.68216269281093e-09                                                                           | 54.375           | 0.149470624870251 | 6                 | 72 |
| negative regulation of ligase activity                                                          |                                                                                                |                  |                   |                   |    |
| GO:0051437                                                                                      | 6.68216269281093e-09                                                                           | 54.375           | 0.149470624870251 | 6                 | 72 |
| positive regulation of ubiquitin-protein ligase activity involved in mitotic cell cycle         |                                                                                                |                  |                   |                   |    |
| GO:0051444                                                                                      | 6.68216269281093e-09                                                                           | 54.375           | 0.149470624870251 | 6                 | 72 |
| negative regulation of ubiquitin-protein ligase activity                                        |                                                                                                |                  |                   |                   |    |
| GO:0031571                                                                                      | 7.27017602897557e-09                                                                           | 53.5597014925373 |                   | 0.151546605771227 |    |
| 6 73                                                                                            | mitotic cell cycle G1/S transition DNA damage checkpoint                                       |                  |                   |                   |    |
| GO:0002479                                                                                      | 8.57510599745578e-09                                                                           | 52               | 0.155698567573178 | 6                 | 75 |
| antigen processing and presentation of exogenous peptide antigen via MHC class I, TAP-dependent |                                                                                                |                  |                   |                   |    |
| GO:0051439                                                                                      | 1.08915271556663e-08                                                                           | 49.8229166666667 |                   | 0.161926510276105 |    |
| 6 78                                                                                            | regulation of ubiquitin-protein ligase activity involved in mitotic cell cycle                 |                  |                   |                   |    |
| GO:0000216                                                                                      | 1.17698986002428e-08                                                                           | 49.1369863013699 |                   | 0.164002491177081 |    |
| 6 79                                                                                            | M/G1 transition of mitotic cell cycle                                                          |                  |                   |                   |    |
| GO:0042590                                                                                      | 1.17698986002428e-08                                                                           | 49.1369863013699 |                   | 0.164002491177081 |    |
| 6 79                                                                                            | antigen processing and presentation of exogenous peptide antigen via MHC class I               |                  |                   |                   |    |
| GO:0071158                                                                                      | 1.27060535538087e-08                                                                           | 48.4695945945946 |                   | 0.166078472078057 |    |
| 6 80                                                                                            | positive regulation of cell cycle arrest                                                       |                  |                   |                   |    |
| GO:0031575                                                                                      | 1.47636597233999e-08                                                                           | 47.1875          | 0.170230433880008 | 6                 | 82 |
| mitotic cell cycle G1/S transition checkpoint                                                   |                                                                                                |                  |                   |                   |    |
| GO:0051443                                                                                      | 1.47636597233999e-08                                                                           | 47.1875          | 0.170230433880008 | 6                 | 82 |
| positive regulation of ubiquitin-protein ligase activity                                        |                                                                                                |                  |                   |                   |    |
| GO:0002478                                                                                      | 1.58913587152108e-08                                                                           | 46.5714285714286 |                   | 0.172306414780984 |    |
| 6 83                                                                                            | antigen processing and presentation of exogenous peptide antigen                               |                  |                   |                   |    |
| GO:0031145                                                                                      | 1.58913587152108e-08                                                                           | 46.5714285714286 |                   | 0.172306414780984 |    |
| 6 83                                                                                            | anaphase-promoting complex-dependent proteasomal ubiquitin-dependent protein catabolic process |                  |                   |                   |    |
| GO:2000602                                                                                      | 1.63425650901189e-08                                                                           | 31.045652173913  | 0.305169192443429 |                   | 7  |
| 147                                                                                             | regulation of interphase of mitotic cell cycle                                                 |                  |                   |                   |    |
| GO:0019884                                                                                      | 1.83610184479699e-08                                                                           | 45.3860759493671 |                   | 0.176458376582935 |    |
| 6 85                                                                                            | antigen processing and presentation of exogenous antigen                                       |                  |                   |                   |    |
| GO:0051351                                                                                      | 1.97099177666051e-08                                                                           | 44.815625        | 0.178534357483911 |                   | 6  |
| 86                                                                                              | positive regulation of ligase activity                                                         |                  |                   |                   |    |
| GO:0071779                                                                                      | 1.97099177666051e-08                                                                           | 44.815625        | 0.178534357483911 |                   | 6  |
| 86                                                                                              | G1/S transition checkpoint                                                                     |                  |                   |                   |    |
| GO:0031397                                                                                      | 2.96382080598767e-08                                                                           | 41.671511627907  | 0.190990242889765 |                   | 6  |
| 92                                                                                              | negative regulation of protein ubiquitination                                                  |                  |                   |                   |    |
| GO:0051438                                                                                      | 3.83125302602106e-08                                                                           | 39.8083333333333 |                   | 0.199294166493668 |    |
| 6 96                                                                                            | regulation of ubiquitin-protein ligase activity                                                |                  |                   |                   |    |
| GO:0002474                                                                                      | 4.61104909350121e-08                                                                           | 38.5161290322581 |                   | 0.205522109196595 |    |
| 6 99                                                                                            | antigen processing and presentation of peptide antigen via MHC class I                         |                  |                   |                   |    |
| GO:0051340                                                                                      | 4.89836579529392e-08                                                                           | 38.1037234042553 |                   | 0.207598090097571 |    |
| 6 100                                                                                           | regulation of ligase activity                                                                  |                  |                   |                   |    |
| GO:0048002                                                                                      | 7.77374940761755e-08                                                                           | 35.0955882352941 |                   | 0.224205937305377 |    |
| 6 108                                                                                           | antigen processing and presentation of peptide antigen                                         |                  |                   |                   |    |
| GO:0000082                                                                                      | 8.28495259004838e-08                                                                           | 24.2152052465387 |                   | 0.386132447581482 |    |
| 7 186                                                                                           | G1/S transition of mitotic cell cycle                                                          |                  |                   |                   |    |
| GO:0030330                                                                                      | 1.25433059224399e-07                                                                           | 32.2297297297297 |                   | 0.242889765414158 |    |
| 6 117                                                                                           | DNA damage response, signal transduction by p53 class mediator                                 |                  |                   |                   |    |
| GO:0072331                                                                                      | 1.68967505186815e-07                                                                           | 30.5641025641026 |                   | 0.255345650820012 |    |
| 6 123                                                                                           | signal transduction by p53 class mediator                                                      |                  |                   |                   |    |
| GO:0031398                                                                                      | 2.04375567662649e-07                                                                           | 29.5454545454545 |                   | 0.263649574423915 |    |
| 6 127                                                                                           | positive regulation of protein ubiquitination                                                  |                  |                   |                   |    |
| GO:0000077                                                                                      | 2.34758725350849e-07                                                                           | 28.8245967741935 |                   | 0.269877517126842 |    |
| 6 130                                                                                           | DNA damage checkpoint                                                                          |                  |                   |                   |    |
| GO:0000084                                                                                      | 2.80959714360291e-07                                                                           | 27.916015625     | 0.278181440730745 |                   | 6  |
| 134                                                                                             | S phase of mitotic cell cycle                                                                  |                  |                   |                   |    |
| GO:0031570                                                                                      | 3.06719228726957e-07                                                                           | 27.4826923076923 |                   | 0.282333402532697 |    |

STable4\_20PerPair

|                                               |                          |                                                           |                  |                   |         |                    |        |                   |      |
|-----------------------------------------------|--------------------------|-----------------------------------------------------------|------------------|-------------------|---------|--------------------|--------|-------------------|------|
| 6                                             | 136                      | DNA integrity checkpoint                                  |                  |                   |         |                    |        |                   |      |
| GO:0007093                                    |                          | 3.48975113536308e-07                                      | 26.8571428571429 |                   |         |                    |        | 0.288561345235624 |      |
| 6                                             | 139                      | mitotic cell cycle checkpoint                             |                  |                   |         |                    |        |                   |      |
| GO:0042770                                    |                          | 3.64079545731552e-07                                      | 26.6548507462687 |                   |         |                    |        | 0.2906373261366   | 6    |
| 140                                           | signal                   | transduction in response to DNA damage                    |                  |                   |         |                    |        |                   |      |
| GO:0051320                                    |                          | 4.12650314043875e-07                                      | 26.0656934306569 |                   |         |                    |        | 0.296865268839527 |      |
| 6                                             | 143                      | S phase                                                   |                  |                   |         |                    |        |                   |      |
| GO:0090068                                    |                          | 5.68762218632599e-07                                      | 24.6137931034483 |                   |         |                    |        | 0.313473116047332 |      |
| 6                                             | 151                      | positive regulation of cell cycle process                 |                  |                   |         |                    |        |                   |      |
| GO:0019882                                    |                          | 5.91289054146557e-07                                      | 24.4434931506849 |                   |         |                    |        | 0.315549096948308 |      |
| 6                                             | 152                      | antigen processing and presentation                       |                  |                   |         |                    |        |                   |      |
| GO:0000209                                    |                          | 8.28994291915284e-07                                      | 23.0096774193548 |                   |         |                    |        | 0.334232925057089 |      |
| 6                                             | 161                      | protein polyubiquitination                                |                  |                   |         |                    |        |                   |      |
| GO:0031396                                    |                          | 1.06371034376703e-06                                      | 22.0046296296296 |                   |         |                    |        | 0.348764791363919 |      |
| 6                                             | 168                      | regulation of protein ubiquitination                      |                  |                   |         |                    |        |                   |      |
| GO:0007346                                    |                          | 2.23664730534032e-06                                      | 14.5233548766157 |                   |         |                    |        | 0.62902221299564  |      |
| 7                                             | 303                      | regulation of mitotic cell cycle                          |                  |                   |         |                    |        |                   |      |
| GO:0043161                                    |                          | 3.78521980910599e-06                                      | 17.5098522167488 |                   |         |                    |        | 0.433880008303924 |      |
| 6                                             | 209                      | proteasomal ubiquitin-dependent protein catabolic process |                  |                   |         |                    |        |                   |      |
| GO:0010498                                    |                          | 4.57725075111673e-06                                      | 16.9178571428571 |                   |         |                    |        | 0.448411874610754 |      |
| 6                                             | 216                      | proteasomal protein catabolic process                     |                  |                   |         |                    |        |                   |      |
| GO:0006521                                    |                          | 5.52175345972073e-06                                      | 41.7068214804064 |                   |         |                    |        | 0.118330911355616 |      |
| 4                                             | 57                       | regulation of cellular amino acid metabolic process       |                  |                   |         |                    |        |                   |      |
| GO:0000075                                    |                          | 8.78757779016714e-06                                      | 15.0264830508475 |                   |         |                    |        | 0.502387378036122 |      |
| 6                                             | 242                      | cell cycle checkpoint                                     |                  |                   |         |                    |        |                   |      |
| GO:0051329                                    |                          | 9.76062238866366e-06                                      | 11.4940392706872 |                   |         |                    |        | 0.786796761469794 |      |
| 7                                             | 379                      | interphase of mitotic cell cycle                          |                  |                   |         |                    |        |                   |      |
| GO:0051325                                    |                          | 1.1183273928385e-05                                       | 11.245652173913  | 0.8034046086776   | 7       |                    |        |                   | 387  |
| interphase                                    |                          |                                                           |                  |                   |         |                    |        |                   |      |
| GO:0033238                                    |                          | 1.40738090422235e-05                                      | 32.472850678733  | 0.149470624870251 |         |                    |        |                   | 4    |
| 72                                            | regulation               | of cellular amine metabolic process                       |                  |                   |         |                    |        |                   |      |
| GO:0071156                                    |                          | 1.44265095004602e-05                                      | 13.7238372093023 |                   |         |                    |        | 0.548058957857588 |      |
| 6                                             | 264                      | regulation of cell cycle arrest                           |                  |                   |         |                    |        |                   |      |
| GO:0010564                                    |                          | 1.73202083240063e-05                                      | 10.4794359576968 |                   |         |                    |        | 0.859456093003944 |      |
| 7                                             | 414                      | regulation of cell cycle process                          |                  |                   |         |                    |        |                   |      |
| Tissue: Heart_Left_Ventricle=>Muscle_Skeletal | Type:                    | asymmetric                                                |                  |                   |         |                    |        |                   |      |
| SourceGene:                                   | ITPKA(ENSG00000137825.6) |                                                           |                  |                   |         |                    |        |                   |      |
| TargetGeneSet:                                | TMEM52                   | UBAP2L                                                    | HADH             | HADHB             | RPLP0P6 | UGP2               | RUVBL1 | DCUN1D1           |      |
| ZDHH19                                        | ETFDH                    | NUDT3                                                     | EPHA7            | RP11              | SND1    | ZNF703             | TOR1B  | FAM213A           | NXF1 |
| HOXC9                                         | ACADVL                   | DHX40                                                     | ECH1             | PIGT              | RAB9A   |                    |        |                   |      |
| GOBPID                                        | Pvalue                   | OddsRatio                                                 | ExpCount         | Count             | Size    | Term               |        |                   |      |
| GO:0006635                                    |                          | 1.41289059246051e-08                                      | 88.1066176470588 |                   |         | 0.0813784513182479 |        |                   |      |
| 5                                             | 56                       | fatty acid beta-oxidation                                 |                  |                   |         |                    |        |                   |      |
| GO:0009062                                    |                          | 3.81315591051784e-08                                      | 71.2648809523809 |                   |         | 0.0988166908864438 |        |                   |      |
| 5                                             | 68                       | fatty acid catabolic process                              |                  |                   |         |                    |        |                   |      |
| GO:0072329                                    |                          | 8.16074322110899e-08                                      | 60.625           | 0.114801743823957 | 5       | 79                 |        |                   |      |
| monocarboxylic acid catabolic process         |                          |                                                           |                  |                   |         |                    |        |                   |      |
| GO:0019395                                    |                          | 1.32806728447555e-07                                      | 54.6798780487805 |                   |         | 0.126427236869421  |        |                   |      |
| 5                                             | 87                       | fatty acid oxidation                                      |                  |                   |         |                    |        |                   |      |
| GO:0034440                                    |                          | 1.57526132238458e-07                                      | 52.7389705882353 |                   |         | 0.13078679676147   |        |                   |      |
| 5                                             | 90                       | lipid oxidation                                           |                  |                   |         |                    |        |                   |      |
| GO:0044242                                    |                          | 1.28190144385319e-06                                      | 33.8494318181818 |                   |         | 0.199086568403571  |        |                   |      |
| 5                                             | 137                      | cellular lipid catabolic process                          |                  |                   |         |                    |        |                   |      |
| GO:0030258                                    |                          | 1.81557241724748e-06                                      | 31.443661971831  | 0.213618434710401 |         | 5                  |        |                   |      |
| 147                                           | lipid modification       |                                                           |                  |                   |         |                    |        |                   |      |
| GO:0016054                                    |                          | 5.76208919702338e-06                                      | 24.6011740331492 |                   |         | 0.270292713307038  |        |                   |      |
| 5                                             | 186                      | organic acid catabolic process                            |                  |                   |         |                    |        |                   |      |
| GO:0046395                                    |                          | 5.76208919702338e-06                                      | 24.6011740331492 |                   |         | 0.270292713307038  |        |                   |      |
| 5                                             | 186                      | carboxylic acid catabolic process                         |                  |                   |         |                    |        |                   |      |
| GO:0044282                                    |                          | 1.24698933640249e-05                                      | 20.8582746478873 |                   |         | 0.316794685488894  |        |                   |      |
| 5                                             | 218                      | small molecule catabolic process                          |                  |                   |         |                    |        |                   |      |
| GO:0032787                                    |                          | 1.67535472839315e-05                                      | 14.2126582278481 |                   |         | 0.582727838903882  |        |                   |      |
| 6                                             | 401                      | monocarboxylic acid metabolic process                     |                  |                   |         |                    |        |                   |      |

Stable4\_20PerPair

| Tissue: Muscle_Skeletal=>Heart_Left_Ventricle                                                                                               | Type: | cluster |
|---------------------------------------------------------------------------------------------------------------------------------------------|-------|---------|
| SourceGene: MYH13(ENSG00000006788.6)                                                                                                        |       |         |
| TargetGeneSet: SSU72 PARK7 DDI2 RPL11 RP4 BTBD8 RPL5 CSDE1 HAX1                                                                             |       |         |
| NOS1AP SNRPE RP11 UBC AAK1 POLR1B EEF1B2 WDR48 RPL14 UBE2K ANK2                                                                             |       |         |
| RPS3A SERF1B RAD50 GNB2L1 HIVEP1 PPIAP29 SRSF3 COQ3 PNISR ARID1B PPIA                                                                       |       |         |
| RPS3AP26 PNPLA8 ZNF467 RPL30 ZNF706 DEPTOR GBA2 RNF20 ZNF483 MRRF                                                                           |       |         |
| ARPC5L APBB1IP RPS24 RPS3AP5 ZDHHC16 PPIAP19 UROS GLRX3 RPL27A DDX6                                                                         |       |         |
| COX14 ACVR1B PFDN5 C12orf73 RPL6 GTF3A POMP COX17P1 METTL17                                                                                 |       |         |
| VTI1B TMED8 CDC42BPB GANC RPS3AP6 RNU6 CD276 MRPL28 RPS15A                                                                                  |       |         |
| RPL26 RPS7P1 SYNRG RPL19 RPL27 RPS7P11 RPS2P48 SRSF1 SRSF2 MYL12B                                                                           |       |         |
| NDUFV2 TXNL4A C19orf35 RIN2 ARFGEF2 PPIAP22 ATP50 HMGB1P10                                                                                  |       |         |
| APOL6 APOL2 APOBEC3C XRCC6 C22orf32 PIGA RPL9P7 EEF1B2P3                                                                                    |       |         |
| RPS2P55 RP6 SPIN4 RPS23P8 MED12 COX7B                                                                                                       |       |         |
| GOBPID Pvalue OddsRatio ExpCount Count Size Term                                                                                            |       |         |
| GO:0006414 14 105 2.6903825884287e-16 34.8791208791209 0.559476852812954                                                                    |       |         |
| GO:0006415 13 91 1.3332248432203e-15 37.2291666666667 0.48487993910456                                                                      |       |         |
| GO:0070972 118 protein 1.45054291603114e-15 30.491452991453 0.628745415542177 14                                                            |       |         |
| GO:0006614 13 105 9.16193873515715e-15 31.5329483695652 0.559476852812954                                                                   |       |         |
| GO:0006613 13 106 1.03994866934022e-14 31.1917002688172 0.564805203792125                                                                   |       |         |
| GO:0045047 13 106 1.03994866934022e-14 31.1917002688172 0.564805203792125                                                                   |       |         |
| GO:0072599 13 106 1.03994866934022e-14 31.1917002688172 0.564805203792125                                                                   |       |         |
| GO:0000184 119 nuclear-transcribed mRNA catabolic process, nonsense-mediated decay 4.8362029249584e-14 27.341391509434 0.634073766521348 13 |       |         |
| GO:0000956 14 169 2.30569410904471e-13 20.3856630824373 0.900491315479898                                                                   |       |         |
| GO:0034623 14 174 3.45338973426966e-13 19.7416666666667 0.927133070375753                                                                   |       |         |
| GO:0006402 14 178 4.72796873249243e-13 19.2547425474255 0.948446474292437                                                                   |       |         |
| GO:0032984 14 179 5.1080815321368e-13 19.1367003367003 0.953774825271608                                                                    |       |         |
| GO:0019058 231 viral infectious cycle 1.05742489747585e-12 15.8579749103943 1.2308490761885 15                                              |       |         |
| GO:0019080 13 151 1.08608954059873e-12 20.9542572463768 0.80458099785482                                                                    |       |         |
| GO:0019083 13 151 1.08608954059873e-12 20.9542572463768 0.80458099785482                                                                    |       |         |
| GO:0006413 13 152 1.1827488475147e-12 20.8020458633094 0.809909348833991                                                                    |       |         |
| GO:0006612 13 153 1.28722352384582e-12 20.6520089285714 0.815237699813162                                                                   |       |         |
| GO:0043624 13 153 1.28722352384582e-12 20.6520089285714 0.815237699813162                                                                   |       |         |
| GO:0043241 13 158 1.9480621205499e-12 19.9328663793103 0.841879454709017                                                                    |       |         |
| GO:0006401 14 205 3.27946995097057e-12 16.5014543339151 1.09231195073005                                                                    |       |         |
| GO:0022415 15 260 5.83733746363248e-12 13.9522712310731 1.38537125458446                                                                    |       |         |
| GO:0072594 13 204 5.01185158014528e-11 15.0833606020942 1.08698359975088                                                                    |       |         |
| GO:0071845 14 284 2.5819617408704e-10 11.6082304526749 1.51325167808456                                                                     |       |         |
| GO:0022411 14 288 3.10317216976828e-10 11.4355231143552 1.53456508200125                                                                    |       |         |
| GO:0016032 1.47811966170085e-09 8.40489918974939 2.40308629160612                                                                           |       |         |

Stable4\_20PerPair

|                                               |         |                                                                |                  |          |         |                   |          |          |          |                    |  |
|-----------------------------------------------|---------|----------------------------------------------------------------|------------------|----------|---------|-------------------|----------|----------|----------|--------------------|--|
| 16                                            | 451     | viral reproduction                                             |                  |          |         |                   |          |          |          |                    |  |
| GO:0071843                                    |         | 5.14402960702649e-08                                           | 10.3406432748538 |          |         |                   |          |          |          | 1.27347588402187   |  |
| 11                                            | 239     | cellular component biogenesis at cellular level                |                  |          |         |                   |          |          |          |                    |  |
| GO:0033365                                    |         | 1.6986105728012e-07                                            | 6.73686758654079 |          |         |                   |          |          |          | 2.52031001314788   |  |
| 14                                            | 473     | protein localization to organelle                              |                  |          |         |                   |          |          |          |                    |  |
| GO:0022613                                    |         | 3.02358418324044e-07                                           | 9.82922596320722 |          |         |                   |          |          |          | 1.19887897031347   |  |
| 10                                            | 225     | ribonucleoprotein complex biogenesis                           |                  |          |         |                   |          |          |          |                    |  |
| GO:0042273                                    |         | 3.57045597231164e-07                                           | 98.3972602739726 |          |         |                   |          |          |          | 0.0639402117500519 |  |
| 4                                             | 12      | ribosomal large subunit biogenesis                             |                  |          |         |                   |          |          |          |                    |  |
| GO:0006605                                    |         | 1.16729083679998e-06                                           | 6.13032131236443 |          |         |                   |          |          |          | 2.52563836412705   |  |
| 13                                            | 474     | protein targeting                                              |                  |          |         |                   |          |          |          |                    |  |
| GO:0071826                                    |         | 1.50487845944361e-05                                           | 12.8378783338328 |          |         |                   |          |          |          | 0.532835097917099  |  |
| 6                                             | 100     | ribonucleoprotein complex subunit organization                 |                  |          |         |                   |          |          |          |                    |  |
| Tissue: Heart_Left_Ventricle=>Muscle_Skeletal |         | Type: asymmetric                                               |                  |          |         |                   |          |          |          |                    |  |
| SourceGene:                                   |         | NELF(ENSG00000165802.14)                                       |                  |          |         |                   |          |          |          |                    |  |
| TargetGeneSet:                                |         | UBR4                                                           | FABP3            | MACF1    | HECTD3  | C1orf52           | CCDC18   | RPS27    | MTX1     |                    |  |
| HAPLN2                                        | RP11    | DUSP12                                                         | SLC19A2          | LRRN2    | PARP1   | C2orf28           | ETAA1    | TPRKB    | RETSAT   |                    |  |
| COX5B                                         | COA5    | MAP4K4                                                         | NDUFB3           | EFHD1    | MYEOV2  | HDLBP             | FAM208A  | GXYLT2   | GAP43    |                    |  |
| NDUFB4                                        | C3orf37 | HAUS3                                                          | DOK7             | WDFY3    | MRPS36  | COX7C             | ID4      | VARS     | TAF11    | CUL7               |  |
| DST                                           | BACH2   | COQ3                                                           | EIF3B            | NDUFA4   | PHF14   | GGCT              | TRIM56   | NDUFA5   | KIAA1549 |                    |  |
| DEFB1                                         | UBE2V2  | ARMC1                                                          | UQCRB            | COX6C    | MRPL13  | TLN1              | CLTA     | FYTTD1P1 |          |                    |  |
| MRPL41                                        | CWF19L1 | PCGF6                                                          | C10orf88         |          | TRIM44  | NDUFS8            | C11orf73 |          | FZD4     |                    |  |
| TMEM135                                       | ATP5L   | ERC1                                                           | USP5             | SLC25A3  | GPN3    | EXOSC8            | FREM2    | SAMD4A   | SYNE2    |                    |  |
| SMEK1                                         | NDUFB1  | DYNC1H1                                                        | SIVA1            | C15orf29 |         | SLC12A6           | CCPG1    | VPS13C   | COX5A    | ETFA               |  |
| PEX11A                                        | MPG     | TRAF7                                                          | PAQR4            | NOMO2    | ARL6IP1 | UQCRC2            | MLYCD    | TRIM16   | SUPT6H   |                    |  |
| TMEM106A                                      |         | MRPL27                                                         | ACSF2            | TACO1    | ATP5H   | C18orf21          |          | ACAA2    | CNDP2    |                    |  |
| PQLC1                                         | UQCR11  | COX6B1                                                         | ECH1             | CYP2G1P  | GEMIN7  | RP1               | MAP1LC3A |          | PI4KA    | MPST               |  |
| C22orf46                                      |         | NDUFB11                                                        | UBE2A            |          |         |                   |          |          |          |                    |  |
| GOBPID                                        | Pvalue  | OddsRatio                                                      | ExpCount         | Count    | Size    | Term              |          |          |          |                    |  |
| GO:0022904                                    |         | 7.13933868438904e-22                                           | 43.3572874493927 |          |         | 0.624455055013494 |          |          |          |                    |  |
| 18                                            | 96      | respiratory electron transport chain                           |                  |          |         |                   |          |          |          |                    |  |
| GO:0022900                                    |         | 3.95593074504116e-19                                           | 29.0764519056261 |          |         | 0.871635180956335 |          |          |          |                    |  |
| 18                                            | 134     | electron transport chain                                       |                  |          |         |                   |          |          |          |                    |  |
| GO:0045333                                    |         | 1.15776440546362e-18                                           | 27.1852716468591 |          |         | 0.92367310220746  |          |          |          |                    |  |
| 18                                            | 142     | cellular respiration                                           |                  |          |         |                   |          |          |          |                    |  |
| GO:0015980                                    |         | 9.91986481979411e-13                                           | 11.5290475323256 |          |         | 1.9969552280119   | 18       |          |          |                    |  |
| 307                                           |         | energy derivation by oxidation of organic compounds            |                  |          |         |                   |          |          |          |                    |  |
| GO:0006091                                    |         | 2.86043603514395e-11                                           | 8.63934800325998 |          |         | 2.78402878693516  |          |          |          |                    |  |
| 19                                            | 428     | generation of precursor metabolites and energy                 |                  |          |         |                   |          |          |          |                    |  |
| GO:0006119                                    |         | 3.47605471064466e-09                                           | 26.6176744186047 |          |         | 0.377274929070653 |          |          |          |                    |  |
| 8                                             | 58      | oxidative phosphorylation                                      |                  |          |         |                   |          |          |          |                    |  |
| GO:0042773                                    |         | 1.99865711717415e-08                                           | 28.7985632183908 |          |         | 0.305722787350356 |          |          |          |                    |  |
| 7                                             | 47      | ATP synthesis coupled electron transport                       |                  |          |         |                   |          |          |          |                    |  |
| GO:0042775                                    |         | 1.99865711717415e-08                                           | 28.7985632183908 |          |         | 0.305722787350356 |          |          |          |                    |  |
| 7                                             | 47      | mitochondrial ATP synthesis coupled electron transport         |                  |          |         |                   |          |          |          |                    |  |
| GO:0006120                                    |         | 1.07279395697902e-07                                           | 32.5613636363636 |          |         | 0.23417064563006  |          |          |          |                    |  |
| 6                                             | 36      | mitochondrial electron transport, NADH to ubiquinone           |                  |          |         |                   |          |          |          |                    |  |
| Tissue: Heart_Left_Ventricle=>Muscle_Skeletal |         | Type: asymmetric                                               |                  |          |         |                   |          |          |          |                    |  |
| SourceGene:                                   |         | OR7A5(ENSG00000188269.3)                                       |                  |          |         |                   |          |          |          |                    |  |
| TargetGeneSet:                                |         | C1orf52                                                        | RP11             | PCNXL2   | UBC     | RPL24             | RPL35A   | RPL34    | LSM6     |                    |  |
| COX7C                                         | CTD     | MRPS12                                                         | NAA38            | RPL27A   | USP5    | SIPA1L1           | SEC11A   | RPS7P1   | RPL27    | CHAD               |  |
| RPL17                                         | WDR7    | SNORA68                                                        |                  |          |         |                   |          |          |          |                    |  |
| GOBPID                                        | Pvalue  | OddsRatio                                                      | ExpCount         | Count    | Size    | Term              |          |          |          |                    |  |
| GO:0006614                                    |         | 7.26569440883648e-14                                           | 147.814432989691 |          |         | 0.11625493045464  |          |          |          |                    |  |
| 8                                             | 105     | SRP-dependent cotranslational protein targeting to membrane    |                  |          |         |                   |          |          |          |                    |  |
| GO:0006613                                    |         | 7.85492180676036e-14                                           | 146.295918367347 |          |         | 0.117362120268494 |          |          |          |                    |  |
| 8                                             | 106     | cotranslational protein targeting to membrane                  |                  |          |         |                   |          |          |          |                    |  |
| GO:0045047                                    |         | 7.85492180676036e-14                                           | 146.295918367347 |          |         | 0.117362120268494 |          |          |          |                    |  |
| 8                                             | 106     | protein targeting to ER                                        |                  |          |         |                   |          |          |          |                    |  |
| GO:0072599                                    |         | 7.85492180676036e-14                                           | 146.295918367347 |          |         | 0.117362120268494 |          |          |          |                    |  |
| 8                                             | 106     | establishment of protein localization to endoplasmic reticulum |                  |          |         |                   |          |          |          |                    |  |
| GO:0070972                                    |         | 1.89402554759958e-13                                           | 130.227272727273 |          |         | 0.130648398034738 |          |          |          |                    |  |
| 8                                             | 118     | protein localization to endoplasmic reticulum                  |                  |          |         |                   |          |          |          |                    |  |



Stable4\_20PerPair

|                                                                 |                                                                         |                  |                      |                      |                                      |
|-----------------------------------------------------------------|-------------------------------------------------------------------------|------------------|----------------------|----------------------|--------------------------------------|
| GO:0006612                                                      | 1.5733295426454e-12                                                     | 98.551724137931  | 0.169400041519618    | 8                    |                                      |
| 153                                                             | protein targeting to membrane                                           |                  |                      |                      |                                      |
| GO:0006415                                                      | 3.39176939742113e-12                                                    | 132.87962962963  | 0.100754273060688    | 7                    |                                      |
| 91                                                              | translational termination                                               |                  |                      |                      |                                      |
| GO:0000956                                                      | 3.52125634699605e-12                                                    | 88.6583850931677 | 0.187115078541277    |                      |                                      |
| 8                                                               | 169 nuclear-transcribed mRNA catabolic process                          |                  |                      |                      |                                      |
| GO:0006402                                                      | 5.355101126179e-12                                                      | 83.9117647058823 | 0.197079786865961    |                      |                                      |
| 8                                                               | 178 mRNA catabolic process                                              |                  |                      |                      |                                      |
| GO:0006414                                                      | 9.46494166699606e-12                                                    | 113.785714285714 | 0.11625493045464     |                      |                                      |
| 7                                                               | 105 translational elongation                                            |                  |                      |                      |                                      |
| GO:0072594                                                      | 1.60610344859003e-11                                                    | 72.6479591836735 | 0.225866722026157    |                      |                                      |
| 8                                                               | 204 establishment of protein localization to organelle                  |                  |                      |                      |                                      |
| GO:0006401                                                      | 1.67049389414366e-11                                                    | 72.2741116751269 | 0.226973911840011    |                      |                                      |
| 8                                                               | 205 RNA catabolic process                                               |                  |                      |                      |                                      |
| GO:0000184                                                      | 2.31164452652353e-11                                                    | 99.4652777777778 | 0.131755587848592    |                      |                                      |
| 7                                                               | 119 nuclear-transcribed mRNA catabolic process, nonsense-mediated decay |                  |                      |                      |                                      |
| GO:0019080                                                      | 1.2505211822669e-10                                                     | 77.1890432098765 | 0.167185661891911    |                      |                                      |
| 7                                                               | 151 viral genome expression                                             |                  |                      |                      |                                      |
| GO:0019083                                                      | 1.2505211822669e-10                                                     | 77.1890432098765 | 0.167185661891911    |                      |                                      |
| 7                                                               | 151 viral transcription                                                 |                  |                      |                      |                                      |
| GO:0006413                                                      | 1.31017098892955e-10                                                    | 76.6513409961686 | 0.168292851705764    |                      |                                      |
| 7                                                               | 152 translational initiation                                            |                  |                      |                      |                                      |
| GO:0043624                                                      | 1.3722330701249e-10                                                     | 76.12100456621   | 0.169400041519618    | 7                    |                                      |
| 153                                                             | cellular protein complex disassembly                                    |                  |                      |                      |                                      |
| GO:0043241                                                      | 1.7216091487359e-10                                                     | 73.5746872700515 | 0.174935990588887    |                      |                                      |
| 7                                                               | 158 protein complex disassembly                                         |                  |                      |                      |                                      |
| GO:0034623                                                      | 3.3947602590686e-10                                                     | 66.4510978043912 | 0.192651027610546    |                      |                                      |
| 7                                                               | 174 cellular macromolecular complex disassembly                         |                  |                      |                      |                                      |
| GO:0032984                                                      | 4.14230218725797e-10                                                    | 64.4967700258398 | 0.198186976679815    |                      |                                      |
| 7                                                               | 179 macromolecular complex disassembly                                  |                  |                      |                      |                                      |
| GO:0019058                                                      | 2.46507857012528e-09                                                    | 49.34375         | 0.255760847000208    | 7                    |                                      |
| 231                                                             | viral infectious cycle                                                  |                  |                      |                      |                                      |
| GO:0022415                                                      | 5.60903100281073e-09                                                    | 43.5985946420729 | 0.287869351601965    |                      |                                      |
| 7                                                               | 260 viral reproductive process                                          |                  |                      |                      |                                      |
| GO:0071845                                                      | 1.03407170427426e-08                                                    | 39.7537103890894 | 0.314441907134454    |                      |                                      |
| 7                                                               | 284 cellular component disassembly at cellular level                    |                  |                      |                      |                                      |
| GO:0022411                                                      | 1.1390980188622e-08                                                     | 39.1767497034401 | 0.318870666389869    |                      |                                      |
| 7                                                               | 288 cellular component disassembly                                      |                  |                      |                      |                                      |
| GO:0033365                                                      | 1.26914402183488e-08                                                    | 30.0430107526882 | 0.523700781952806    |                      |                                      |
| 8                                                               | 473 protein localization to organelle                                   |                  |                      |                      |                                      |
| GO:0006605                                                      | 1.29027933970099e-08                                                    | 29.9763948497854 | 0.52480797176666     |                      |                                      |
| 8                                                               | 474 protein targeting                                                   |                  |                      |                      |                                      |
| GO:0016032                                                      | 2.46764369267241e-07                                                    | 24.5087587587588 | 0.499342606048024    |                      |                                      |
| 7                                                               | 451 viral reproduction                                                  |                  |                      |                      |                                      |
| Tissue: Muscle_Skeletal=>Heart_Left_Ventricle Type: asymmetric  |                                                                         |                  |                      |                      |                                      |
| SourceGene: PTBP2(ENSG00000117569.12)                           |                                                                         |                  |                      |                      |                                      |
| TargetGeneSet: AURKAIP1 BTBD8 KIAA1107 GNAI3 OTUD7B ZBTB37 SWT1 |                                                                         |                  |                      |                      |                                      |
| SUSD4                                                           | UBC                                                                     | NFU1 COX5B       | TSPO NBEAL1 ASB1     | WDR48 ZNF501 BCL6    |                                      |
| NAP1L5                                                          | RP11                                                                    | NDUFS6 TRIM23    | COX7C LARP1 CREBRF   | HIGD2A RNF44 COX7A2  |                                      |
| SLC18B1                                                         | MRPS24                                                                  | PSPH GATSL2      | SRI ATP5J2 GATS      | RPS26P31 GSTK1 CTD   |                                      |
| RPL30                                                           | COX6C                                                                   | FBXO32 FAM49B    | ZFP41 CYC1 NDUFB6    | C9orf131 NDUFA8      |                                      |
| OLFML2A                                                         | PRRC2B                                                                  | CAMSAP1 ENTPD2   | CREM NDUFB8 NDUFS3   | COX8A EFEMP2 NDUFS8  |                                      |
| PFDN5                                                           | ITGA5                                                                   | WIBG FITM1       | PROX2 LINC00521      | COX5A WDR24 UNKL     |                                      |
| RPL3L                                                           | NDUFB10                                                                 | TCEB2 YPEL3      | RBL2 PSMB6 NT5M      | HELZ RECQL5 ALYREF   |                                      |
| SNRPD1                                                          | ATP5D                                                                   | C19orf70         | NDUFB7 COX6B1 POLR2I | NDUFA3 MAPRE1 CEP250 |                                      |
| ATP9A                                                           | PPIAP22                                                                 | ATP5O MRPL40     | RP4 HUWE1 COX7B      |                      |                                      |
| GOBPID                                                          | Pvalue                                                                  | OddsRatio        | ExpCount             | Count Size Term      |                                      |
| GO:0022904                                                      | 20                                                                      | 96               | 5.88938071504012e-28 | 73.8080495356037     | 0.471662860701682                    |
|                                                                 |                                                                         |                  |                      |                      | respiratory electron transport chain |
| GO:0022900                                                      | 20                                                                      | 134              | 7.71309560013103e-25 | 49.0746474028208     | 0.658362743062764                    |
|                                                                 |                                                                         |                  |                      |                      | electron transport chain             |
| GO:0045333                                                      | 20                                                                      | 142              | 2.61492795940944e-24 | 45.8309225329476     | 0.697667981454571                    |
|                                                                 |                                                                         |                  |                      |                      | cellular respiration                 |

Stable4\_20PerPair

|                                                                            |                      |                                                        |                          |
|----------------------------------------------------------------------------|----------------------|--------------------------------------------------------|--------------------------|
| GO:0015980                                                                 | 1.60320971903948e-17 | 19.2566782810685                                       | 1.50833852328559         |
| 20                                                                         | 307                  | energy derivation by oxidation of organic compounds    |                          |
| GO:0006091                                                                 | 9.75352417986163e-15 | 13.4294502114571                                       | 2.10283025396166         |
| 20                                                                         | 428                  | generation of precursor metabolites and energy         |                          |
| GO:0006120                                                                 | 8.3589123933997e-14  | 77.1666666666667                                       | 0.176873572763131        |
| 9                                                                          | 36                   | mitochondrial electron transport, NADH to ubiquinone   |                          |
| GO:0006119                                                                 | 1.83556053078907e-13 | 48.948087431694                                        | 0.284962978340599        |
| 58                                                                         |                      | oxidative phosphorylation                              | 10                       |
| GO:0042773                                                                 | 1.15940979052487e-12 | 54.7869269949066                                       | 0.230918275551865        |
| 9                                                                          | 47                   | ATP synthesis coupled electron transport               |                          |
| GO:0042775                                                                 | 1.15940979052487e-12 | 54.7869269949066                                       | 0.230918275551865        |
| 9                                                                          | 47                   | mitochondrial ATP synthesis coupled electron transport |                          |
| Tissue: Muscle_skeletal=>Heart_Left_Ventricle Type: asymmetric             |                      |                                                        |                          |
| SourceGene: QDPR(ENSG00000151552.7)                                        |                      |                                                        |                          |
| TargetGeneSet: THRAP3 GNG5 ADCK3 FH NFU1 TSPO UGGT1 TNS1                   |                      |                                                        |                          |
| SLC9C1 ARHGAP31 POU5F1P6 RP11 ANTXR2 BNIP1 PPP2R5D MDN1                    |                      |                                                        |                          |
| FBXL18 C7orf41 IGFBP3 DPY19L2P4 GSTK1 TCEB1 COX6C NDUFB9 FAM49B CYC1       |                      |                                                        |                          |
| TSSK5P1 SMARCA2 NDUFB6 FAM122A C9orf174 RNF20 MUSK NDUFA8 ARPC5L           |                      |                                                        |                          |
| PCGF5 SUFU PDCD4 CSRP3 PHF21A NDUFS3 PDE2A TMTC1 TMED8 CDC42BPB            |                      |                                                        |                          |
| HERC2 LRRC49 NDUFB10 ECI1 SNX29 CSDAP1 RBL2 MT1X KLHL36 KIAA0513           |                      |                                                        |                          |
| ZNF624 MLX NFE2L1 ERN1 NDUFV2 FAM210A C19orf70 DDX39A ZNF570 RP1           |                      |                                                        |                          |
| KCNB1 GGA1 SLC16A8 UQRFS1P1 C22orf46 RP4 PACSIN2 ACOT9                     |                      |                                                        |                          |
| RPL9P7 GAPDHP1 TIMM17B COX7B MBNL3                                         |                      |                                                        |                          |
| GOBPID                                                                     | Pvalue               | OddsRatio                                              | ExpCount Count Size Term |
| GO:0022904                                                                 | 1.92258326527859e-10 | 29.0141987829615                                       | 0.398588332987337        |
| 9                                                                          | 96                   | respiratory electron transport chain                   |                          |
| GO:0015980                                                                 | 2.94117361601686e-10 | 13.262483716891                                        | 1.27465227319909         |
| 307                                                                        |                      | energy derivation by oxidation of organic compounds    | 13                       |
| GO:0045333                                                                 | 3.02432975593257e-10 | 21.6045454545455                                       | 0.589578575877102        |
| 10                                                                         | 142                  | cellular respiration                                   |                          |
| GO:0022900                                                                 | 3.83137500848125e-09 | 20.1402352941176                                       | 0.556362881461491        |
| 9                                                                          | 134                  | electron transport chain                               |                          |
| GO:0006120                                                                 | 7.00893603321913e-09 | 53.1888888888889                                       | 0.149470624870251        |
| 6                                                                          | 36                   | mitochondrial electron transport, NADH to ubiquinone   |                          |
| GO:0006091                                                                 | 1.6391297759747e-08  | 9.31494488592669                                       | 1.77703965123521         |
| 13                                                                         | 428                  | generation of precursor metabolites and energy         |                          |
| GO:0042773                                                                 | 3.72981637460749e-08 | 38.8888888888889                                       | 0.195142204691717        |
| 6                                                                          | 47                   | ATP synthesis coupled electron transport               |                          |
| GO:0042775                                                                 | 3.72981637460749e-08 | 38.8888888888889                                       | 0.195142204691717        |
| 6                                                                          | 47                   | mitochondrial ATP synthesis coupled electron transport |                          |
| GO:0006119                                                                 | 1.35720446957882e-07 | 30.6388888888889                                       | 0.240813784513182        |
| 6                                                                          | 58                   | oxidative phosphorylation                              |                          |
| Tissue: Muscle_skeletal=>Heart_Left_Ventricle Type: cluster                |                      |                                                        |                          |
| SourceGene: RNY4P14(ENSG00000200526.1)                                     |                      |                                                        |                          |
| TargetGeneSet: DFFB ZBTB48 LRRC38 COL16A1 CCDC28B COL24A1 GSTM5 BNIPL RGS5 |                      |                                                        |                          |
| RP11 PLA2G4A ANTXR1 LINC00152 XIRP2 FRZB COL3A1 COL5A2 FN1                 |                      |                                                        |                          |
| DOCK10 FBLN2 ROBO1 FILIP1L CCDC80 WDR52 TNIK DCUN1D1 FAM184B KIT           |                      |                                                        |                          |
| SEPT11 HPGDS CXXC4 PDE5A FAM198B CPE LPCAT1 PTGER4 PHF15 TGFBI             |                      |                                                        |                          |
| PCDHGC5 ARSI TRIM41 MAPK14 RP1 PM20D2 MARCKS SLC35F1 EPB41L2 FNDC1 LFNG    |                      |                                                        |                          |
| NFE2L3 VWC2 COL1A2 SLC12A9 EBF2 PLAT MSC CTHRC1 COL14A1 FREM1              |                      |                                                        |                          |
| GLIPR2 RG9MTD3 OGN ASPN ECM2 ANKS6 COL15A1 NCS1 COL5A1 CCDC3               |                      |                                                        |                          |
| ARHGAP22 CDH23 POLL OLFML1 LRRC55 NRXN2 ZC3H12C SCN4B KCNA5                |                      |                                                        |                          |
| LRRC10 LUM ANO4 GPR133 LPAR6 DACT1 SERPINA3 ALDH1A2 FTSJD1                 |                      |                                                        |                          |
| CENPN CAMTA2 MFAP4 STAT3 EZH1 MRC2 CDC42EP4 TIMP2 C17orf62                 |                      |                                                        |                          |
| ARHGAP28 MOB3A ZNF558 ANKRD27 WDR62 PSMC4 ZNF600 ZNF525 ZNF671             |                      |                                                        |                          |
| PTPRT PARD6B CDH26 COL6A1 COL6A2 TOB2 CAPN6 LHFPL1 PLS3                    |                      |                                                        |                          |
| GOBPID                                                                     | Pvalue               | OddsRatio                                              | ExpCount Count Size Term |
| GO:0030198                                                                 | 3.56054065301709e-09 | 13.5361904761905                                       | 0.980416580167462        |
| 11                                                                         | 161                  | extracellular matrix organization                      |                          |
| GO:0043062                                                                 | 3.80116888912781e-09 | 13.445600756859                                        | 0.986506124143658        |
| 162                                                                        |                      | extracellular structure organization                   | 11                       |
| GO:0030199                                                                 | 4.16435072997243e-08 | 38.8509485094851                                       | 0.200954951214449        |
| 6                                                                          | 33                   | collagen fibril organization                           |                          |

Stable4\_20PerPair

|                                                                |                                          |                  |                                                                     |                  |           |                   |        |        |        |     |
|----------------------------------------------------------------|------------------------------------------|------------------|---------------------------------------------------------------------|------------------|-----------|-------------------|--------|--------|--------|-----|
| GO:0071230                                                     | 2.09866096359796e-06                     | 28.781124497992  | 0.21313403916684                                                    | 5                |           |                   |        |        |        |     |
| 35                                                             | cellular response to amino acid stimulus |                  |                                                                     |                  |           |                   |        |        |        |     |
| GO:0071229                                                     | 4.70749855958424e-06                     | 23.9742302543507 | 0.249671303024012                                                   |                  |           |                   |        |        |        |     |
| 5                                                              | 41 cellular response to acid             |                  |                                                                     |                  |           |                   |        |        |        |     |
| GO:0071418                                                     | 1.27485675500892e-05                     | 19.1673360107095 | 0.304477198809771                                                   |                  |           |                   |        |        |        |     |
| 5                                                              | 50 cellular response to amine stimulus   |                  |                                                                     |                  |           |                   |        |        |        |     |
| GO:0071417                                                     | 1.54890956021022e-05                     | 18.3491412458344 | 0.316656286762162                                                   |                  |           |                   |        |        |        |     |
| 5                                                              | 52 cellular response to organic nitrogen |                  |                                                                     |                  |           |                   |        |        |        |     |
| Tissue: Heart_Left_Ventricle=>Muscle_Skeletal Type: asymmetric |                                          |                  |                                                                     |                  |           |                   |        |        |        |     |
| SourceGene: RP1-163G9.1(ENSG00000177133.5)                     |                                          |                  |                                                                     |                  |           |                   |        |        |        |     |
| TargetGeneSet:                                                 | GDI2P2                                   | RP11             | TMEM183A                                                            | KRT18P12         | FAM179A   | MDH1              | UGP2   |        |        |     |
| VAMP8                                                          | COX5B                                    | SPPL2B           | GIGYF2                                                              | PLCL2            | PLCL2-AS1 | ZNF621            | ZDHHC3 | TEX264 | PDHB   |     |
| ZBTB20                                                         | NDUFB4                                   | C3orf55          | LIMCH1                                                              | EGF              | MRPS36    | UQCRQ             | GUSBP2 | XPO5   | WDR11  |     |
| IFNGR1                                                         | PHACTR2                                  | NDUFA4           | POR                                                                 | TMEM120A         | CTB       | ERVW-1            | NDUFA5 | GSTK1  |        |     |
| HMBX1                                                          | CTD                                      | VDAC3            | IMPA1                                                               | C8orf38          | TAF1L     | MRPL41            | TIMM23 | MYPN   | MMS19  |     |
| FADS3                                                          | TMEM135                                  | LDHB             | DDX23                                                               | ASIC1            | HOXC9     | SLC25A3           | CHPT1  | FREM2  | EDNRB  |     |
| CMTM5                                                          | SAMD4A                                   | LGALS3           | DYNC1H1                                                             | CHKB             | GANC      | COX5A             | RPUSD1 | GRIN2A | UQCRC2 |     |
| TMCO7                                                          | ADAT1                                    | VPS53            | RPS4XP17                                                            |                  | NF1       | KRT32             | ATP5H  | METRNL | NDUFV2 |     |
| ACAA2                                                          | FBN3                                     | RYR1             | LIPE                                                                | SBK2             | URB1      | CECR2             | ASB11  | TCEAL2 | UBE2A  |     |
| GOBPID                                                         | Pvalue                                   | OddsRatio        | ExpCount                                                            | Count            | Size      | Term              |        |        |        |     |
| GO:0045333                                                     | 11                                       | 142              | 6.25226838176364e-11                                                | 20.6318768096868 |           | 0.678015362258667 |        |        |        |     |
|                                                                |                                          |                  | cellular respiration                                                |                  |           |                   |        |        |        |     |
| GO:0022904                                                     | 9                                        | 96               | 7.01828460502807e-10                                                | 24.6465517241379 |           | 0.458376582935437 |        |        |        |     |
|                                                                |                                          |                  | respiratory electron transport chain                                |                  |           |                   |        |        |        |     |
| GO:0022900                                                     | 10                                       | 134              | 7.1571976333513e-10                                                 | 19.4887916894478 |           | 0.639817313680714 |        |        |        |     |
|                                                                |                                          |                  | electron transport chain                                            |                  |           |                   |        |        |        |     |
| GO:0006091                                                     | 15                                       | 428              | 1.21707375563813e-09                                                | 9.39534570890503 |           | 2.04359559892049  |        |        |        |     |
|                                                                |                                          |                  | generation of precursor metabolites and energy                      |                  |           |                   |        |        |        |     |
| GO:0015980                                                     | 12                                       | 307              | 2.03692193812284e-08                                                | 10.0531668153434 |           | 1.46585011417895  |        |        |        |     |
|                                                                |                                          |                  | energy derivation by oxidation of organic compounds                 |                  |           |                   |        |        |        |     |
| GO:0006119                                                     | 5                                        | 58               | 8.0674877637956e-06                                                 | 21.1217570754717 |           | 0.27693585219016  |        |        |        |     |
|                                                                |                                          |                  | oxidative phosphorylation                                           |                  |           |                   |        |        |        |     |
| Tissue: Heart_Left_Ventricle=>Muscle_Skeletal Type: asymmetric |                                          |                  |                                                                     |                  |           |                   |        |        |        |     |
| SourceGene: RP1-228H13.1(ENSG00000227311.1)                    |                                          |                  |                                                                     |                  |           |                   |        |        |        |     |
| TargetGeneSet:                                                 | RP11                                     | NUDT4P1          | IL6R                                                                | TMEM17           | HDAC4     | ATP13A4-AS1       | RPS10  |        |        |     |
| RPL10A                                                         | VPS26A                                   | VDAC2            | EIF3F                                                               | NUDT4            | TIMM9     | RP3               | IGHD   | TGM7   | MRPS34 | CTD |
| RPL13                                                          | EIF3K                                    | RPL18            | FUNDC2                                                              |                  |           |                   |        |        |        |     |
| GOBPID                                                         | Pvalue                                   | OddsRatio        | ExpCount                                                            | Count            | Size      | Term              |        |        |        |     |
| GO:0006413                                                     | 6                                        | 152              | 1.37968195674388e-08                                                | 53.3798256537983 |           | 0.178811154937375 |        |        |        |     |
|                                                                |                                          |                  | translational initiation                                            |                  |           |                   |        |        |        |     |
| GO:0006612                                                     | 5                                        | 153              | 6.95845230174473e-07                                                | 40.2195945945946 |           | 0.179987544114594 |        |        |        |     |
|                                                                |                                          |                  | protein targeting to membrane                                       |                  |           |                   |        |        |        |     |
| GO:0072594                                                     | 5                                        | 204              | 2.87729689222389e-06                                                | 29.8052763819095 |           | 0.239983392152792 |        |        |        |     |
|                                                                |                                          |                  | establishment of protein localization to organelle                  |                  |           |                   |        |        |        |     |
| GO:0006415                                                     | 4                                        | 91               | 3.28912916443026e-06                                                | 50.7409372236958 |           | 0.107051415126981 |        |        |        |     |
|                                                                |                                          |                  | translational termination                                           |                  |           |                   |        |        |        |     |
| GO:0006414                                                     | 4                                        | 105              | 5.82364233891752e-06                                                | 43.6648895658797 |           | 0.123520863608055 |        |        |        |     |
|                                                                |                                          |                  | translational elongation                                            |                  |           |                   |        |        |        |     |
| GO:0006614                                                     | 4                                        | 105              | 5.82364233891752e-06                                                | 43.6648895658797 |           | 0.123520863608055 |        |        |        |     |
|                                                                |                                          |                  | SRP-dependent cotranslational protein targeting to membrane         |                  |           |                   |        |        |        |     |
| GO:0006613                                                     | 4                                        | 106              | 6.04765176555914e-06                                                | 43.2337858220211 |           | 0.124697252785274 |        |        |        |     |
|                                                                |                                          |                  | cotranslational protein targeting to membrane                       |                  |           |                   |        |        |        |     |
| GO:0045047                                                     | 4                                        | 106              | 6.04765176555914e-06                                                | 43.2337858220211 |           | 0.124697252785274 |        |        |        |     |
|                                                                |                                          |                  | protein targeting to ER                                             |                  |           |                   |        |        |        |     |
| GO:0072599                                                     | 4                                        | 106              | 6.04765176555914e-06                                                | 43.2337858220211 |           | 0.124697252785274 |        |        |        |     |
|                                                                |                                          |                  | establishment of protein localization to endoplasmic reticulum      |                  |           |                   |        |        |        |     |
| GO:0070972                                                     | 4                                        | 118              | 9.26148736805911e-06                                                | 38.6504723346829 |           | 0.138813922911909 |        |        |        |     |
|                                                                |                                          |                  | protein localization to endoplasmic reticulum                       |                  |           |                   |        |        |        |     |
| GO:0000184                                                     | 4                                        | 119              | 9.57670561999659e-06                                                | 38.3117056856187 |           | 0.139990312089129 |        |        |        |     |
|                                                                |                                          |                  | nuclear-transcribed mRNA catabolic process, nonsense-mediated decay |                  |           |                   |        |        |        |     |
| Tissue: Heart_Left_Ventricle=>Muscle_Skeletal Type: asymmetric |                                          |                  |                                                                     |                  |           |                   |        |        |        |     |
| SourceGene: SRSF1(ENSG00000136450.6)                           |                                          |                  |                                                                     |                  |           |                   |        |        |        |     |
| TargetGeneSet:                                                 | NKAIN1                                   | USP33            | KCNC4                                                               | BRP44            | FAM129A   | MDH1              | TIA1   | SUCLG1 |        |     |

Stable4\_20PerPair

| GOBPID                                                         | Pvalue  | OddsRatio | ExpCount             | Count            | Size              | Term                                                   |         |          |           |
|----------------------------------------------------------------|---------|-----------|----------------------|------------------|-------------------|--------------------------------------------------------|---------|----------|-----------|
| GO:0045333                                                     | 17      | 142       | 9.61868886345563e-22 | 52.4592432432432 |                   | cellular respiration                                   |         |          |           |
| GO:0022904                                                     | 14      | 96        | 3.17953538779795e-19 | 61.1006097560976 |                   | respiratory electron transport chain                   |         |          |           |
| GO:0022900                                                     | 134     |           | 4.11300559421583e-17 | 41.64125         | 0.500726593315342 | electron transport chain                               |         |          |           |
| GO:0015980                                                     | 17      | 307       | 5.4562090248746e-16  | 22.3503261882572 |                   | energy derivation by oxidation of organic compounds    |         |          |           |
| GO:0006091                                                     | 18      | 428       | 7.85300294206473e-15 | 17.0573170731707 |                   | generation of precursor metabolites and energy         |         |          |           |
| GO:0006119                                                     | 8       | 58        | 3.67604008661309e-11 | 49.9026086956522 |                   | oxidative phosphorylation                              |         |          |           |
| GO:0042773                                                     | 47      |           | 3.81102226867521e-10 | 53.456914893617  | 0.175627984222545 | ATP synthesis coupled electron transport               |         |          |           |
| GO:0042775                                                     | 47      |           | 3.81102226867521e-10 | 53.456914893617  | 0.175627984222545 | mitochondrial ATP synthesis coupled electron transport |         |          |           |
| GO:0006120                                                     | 5       | 36        | 2.08094257316656e-07 | 47.2876892692561 |                   | mitochondrial electron transport, NADH to ubiquinone   |         |          |           |
| GO:0009060                                                     | 4       | 42        | 1.75417182913406e-05 | 30.2294736842105 |                   | aerobic respiration                                    |         |          |           |
| Tissue: Heart_Left_Ventricle=>Muscle_Skeletal Type: asymmetric |         |           |                      |                  |                   |                                                        |         |          |           |
| SourceGene: SUSD2(ENSG00000099994.10)                          |         |           |                      |                  |                   |                                                        |         |          |           |
| TargetGeneSet:                                                 |         |           |                      |                  |                   |                                                        |         |          |           |
| MLF1                                                           | COX18   | RAB33B    | RICTOR               | MRPS30           | IL6ST             | COQ3                                                   | RTN4IP1 | C6orf203 | SGK1      |
| STAG3                                                          | RP11    | MRPL15    | PGM5P1               | PDSS1            | RHOBTB1           | PPIF                                                   | GHITM   | FZD4     | CD9       |
| AP5M1                                                          | DIO2    | SLC25A29  | ETFA                 | UQCRC2           | CIAPIN1           | GLG1                                                   | TEX2    | METRNL   |           |
| ATP5A1                                                         | PSMD4P1 | C21orf33  | ARVCF                | HPS4             | NDUFA6            | APOO                                                   | TIMM8A  | SLC25A5  |           |
| GOBPID                                                         | Pvalue  | OddsRatio | ExpCount             | Count            | Size              | Term                                                   |         |          |           |
| GO:0045333                                                     | 8       | 142       | 2.16383598522514e-09 | 29.3978383942357 |                   | cellular respiration                                   |         |          |           |
| GO:0015980                                                     | 10      | 307       | 3.39155268413446e-09 | 17.6044394562913 |                   | energy derivation by oxidation of organic compounds    |         |          |           |
| GO:0006091                                                     | 428     |           | 7.95810263568277e-08 | 12.401205032784  | 1.09584111826171  | generation of precursor metabolites and energy         |         |          |           |
| GO:0022904                                                     | 6       | 96        | 1.44492783454821e-07 | 30.8043010752688 |                   | respiratory electron transport chain                   |         |          |           |
| GO:0022900                                                     | 134     |           | 1.04301560891696e-06 | 21.601814516129  | 0.343090443567919 | electron transport chain                               |         |          |           |
| GO:0006119                                                     | 4       | 58        | 1.39768675208686e-05 | 32.2334455667789 |                   | oxidative phosphorylation                              |         |          |           |
| Tissue: Muscle_skeletal=>Heart_Left_Ventricle Type: asymmetric |         |           |                      |                  |                   |                                                        |         |          |           |
| SourceGene: TRDN(ENSG00000186439.7)                            |         |           |                      |                  |                   |                                                        |         |          |           |
| TargetGeneSet:                                                 |         |           |                      |                  |                   |                                                        |         |          |           |
| EEF1B2                                                         | UBE2F   | MAP4      | RPL29                | THOC7            | HTT-AS1           | MRAP                                                   | RP11    | RPS3A    | MTND5P11  |
| CTB                                                            | NQO2    | SRSF3     | HDDC2                | FBXL18           | CYCS              | MRPS24                                                 | TCEB1   | AK1      | METTLL11A |
| GLRX3                                                          | RPL27A  | NDUFS3    | PFDN5                | RAP1B            | RPL6              | HERC2P10                                               | PHGR1   | ZFAND6   |           |
| STUB1                                                          | ECI1    | RPS15A    | METTLL16             | TMEM93           | TXNDC17           | STX8                                                   | RPS7P1  | RPL27    | ICT1      |
| NDUFV2                                                         | RPL17   | C19orf70  | RPL36                | ZNF121           | MRPL4             | ECSIT                                                  | MRPS12  | ERCC1    |           |
| AP2S1                                                          | RP13    | COX7B     | GLA                  |                  |                   |                                                        |         |          |           |
| GOBPID                                                         | Pvalue  | OddsRatio | ExpCount             | Count            | Size              | Term                                                   |         |          |           |
| GO:0006415                                                     | 10      | 91        | 1.57116185129279e-13 | 50.5291005291005 |                   | translational termination                              |         |          |           |
| GO:0006414                                                     | 10      | 105       | 6.83719788344114e-13 | 43.0406015037594 |                   | translational elongation                               |         |          |           |

Stable4\_20PerPair

|                                                        |                                                                     |                  |                         |
|--------------------------------------------------------|---------------------------------------------------------------------|------------------|-------------------------|
| GO:0022415                                             | 1.51654404867934e-11                                                | 20.7595307917889 | 0.809632551380527       |
| 12 260                                                 | viral reproductive process                                          |                  |                         |
| GO:0019080                                             | 2.68062413950479e-11                                                | 28.9057750759878 | 0.470209674070999       |
| 10 151                                                 | viral genome expression                                             |                  |                         |
| GO:0019083                                             | 2.68062413950479e-11                                                | 28.9057750759878 | 0.470209674070999       |
| 10 151                                                 | viral transcription                                                 |                  |                         |
| GO:0006614                                             | 2.839953166158e-11                                                  | 37.265625        | 0.326966991903675 9     |
| 105                                                    | SRP-dependent cotranslational protein targeting to membrane         |                  |                         |
| GO:0043624                                             | 3.05645861104189e-11                                                | 28.4975024975025 | 0.476437616773926       |
| 10 153                                                 | cellular protein complex disassembly                                |                  |                         |
| GO:0006613                                             | 3.09646487107332e-11                                                | 36.8788659793814 | 0.330080963255138       |
| 9 106                                                  | cotranslational protein targeting to membrane                       |                  |                         |
| GO:0045047                                             | 3.09646487107332e-11                                                | 36.8788659793814 | 0.330080963255138       |
| 9 106                                                  | protein targeting to ER                                             |                  |                         |
| GO:0072599                                             | 3.09646487107332e-11                                                | 36.8788659793814 | 0.330080963255138       |
| 9 106                                                  | establishment of protein localization to endoplasmic reticulum      |                  |                         |
| GO:0043241                                             | 4.2098732973947e-11                                                 | 27.5250965250965 | 0.492007473531244       |
| 10 158                                                 | protein complex disassembly                                         |                  |                         |
| GO:0070972                                             | 8.20550790764881e-11                                                | 32.7912844036697 | 0.367448619472701       |
| 9 118                                                  | protein localization to endoplasmic reticulum                       |                  |                         |
| GO:0019058                                             | 8.63871384160125e-11                                                | 20.8617647058824 | 0.719327382188084       |
| 11 231                                                 | viral infectious cycle                                              |                  |                         |
| GO:0000184                                             | 8.85686637461013e-11                                                | 32.4909090909091 | 0.370562590824164       |
| 9 119                                                  | nuclear-transcribed mRNA catabolic process, nonsense-mediated decay |                  |                         |
| GO:0034623                                             | 1.09543149198663e-10                                                | 24.8118466898955 | 0.541831015154661       |
| 10 174                                                 | cellular macromolecular complex disassembly                         |                  |                         |
| GO:0032984                                             | 1.44894676833757e-10                                                | 24.0693153000845 | 0.557400871911978       |
| 10 179                                                 | macromolecular complex disassembly                                  |                  |                         |
| GO:0072594                                             | 5.23025518826207e-10                                                | 20.9307805596465 | 0.635250155698568       |
| 10 204                                                 | establishment of protein localization to organelle                  |                  |                         |
| GO:0016032                                             | 6.5912322409242e-10                                                 | 12.9554794520548 | 1.40440107951007        |
| 13 451                                                 | viral reproduction                                                  |                  |                         |
| GO:0071845                                             | 7.81150313155869e-10                                                | 16.7488687782805 | 0.884367863815653       |
| 11 284                                                 | cellular component disassembly at cellular level                    |                  |                         |
| GO:0006413                                             | 7.96884843940991e-10                                                | 24.9353146853147 | 0.473323645422462       |
| 9 152                                                  | translational initiation                                            |                  |                         |
| GO:0006612                                             | 8.44779860055398e-10                                                | 24.7604166666667 | 0.476437616773926       |
| 9 153                                                  | protein targeting to membrane                                       |                  |                         |
| GO:0022411                                             | 9.0561627267405e-10                                                 | 16.5023359524315 | 0.896823749221507       |
| 11 288                                                 | cellular component disassembly                                      |                  |                         |
| GO:0000956                                             | 2.04094139108864e-09                                                | 22.259375        | 0.526261158397343 9     |
| 169                                                    | nuclear-transcribed mRNA catabolic process                          |                  |                         |
| GO:0006402                                             | 3.22575021615126e-09                                                | 21.060650887574  | 0.554286900560515 9     |
| 178                                                    | mRNA catabolic process                                              |                  |                         |
| GO:0006401                                             | 1.11181915330089e-08                                                | 18.125           | 0.638364127050031 9 205 |
|                                                        | RNA catabolic process                                               |                  |                         |
| GO:0033365                                             | 1.46260855257869e-06                                                | 8.60413452638075 | 1.47290844924227        |
| 10 473                                                 | protein localization to organelle                                   |                  |                         |
| GO:0006605                                             | 1.49077133793387e-06                                                | 8.58497536945813 | 1.47602242059373        |
| 10 474                                                 | protein targeting                                                   |                  |                         |
| Tissue: Nerve_Tibial=>Muscle_Skeletal Type: asymmetric |                                                                     |                  |                         |

SourceGene: AAK1(ENSG00000115977.13) AP2 associated kinase 1

TargetGeneSet: MTND2P28 PLEKHM2 RPL11 RPS27 KLHL12 MRPL55 EIF5B  
 EEF1B2 ENTPD3-AS1 RPL29 RP11 RPL34 MTND5P11 SYNPO MTRNR2L9

STable4\_20PerPair

|          |         |        |          |       |          |       |         |          |
|----------|---------|--------|----------|-------|----------|-------|---------|----------|
| RPS3AP26 | MTUS1   | PCM1   | RPS20    | RPL30 | 7SK      | RPS24 | RPS3AP5 | MTRNR2L8 |
| RBMS1P1  | COX17P1 | DNAJC3 | GOLGA8IP | ADCY7 | MTRNR2L1 |       | RPL23A  | RPS7P11  |
| PRR15L   | RPS2P48 | LYPD3  | CTA      | ITIH6 | RPL39    | MT    |         |          |

| GOBPID                                                                | Pvalue   | OddsRatio | ExpCount    | Count       | Size | Term |
|-----------------------------------------------------------------------|----------|-----------|-------------|-------------|------|------|
| GO:0006414                                                            | 1.59E-16 |           | 125.7368421 | 0.159850529 | 10   | 105  |
| translational elongation                                              |          |           |             |             |      |      |
| GO:0006415                                                            | 4.83E-15 |           | 121.1285178 | 0.138537125 | 9    | 91   |
| translational termination                                             |          |           |             |             |      |      |
| GO:0006413                                                            | 7.13E-15 |           | 83.84389671 | 0.231402671 | 10   | 152  |
| translational initiation                                              |          |           |             |             |      |      |
| GO:0006614                                                            | 1.83E-14 |           | 103.3629808 | 0.159850529 | 9    | 105  |
| SRP-dependent cotranslational protein targeting to membrane           |          |           |             |             |      |      |
| GO:0006613                                                            | 2.00E-14 |           | 102.2902458 | 0.161372915 | 9    | 106  |
| cotranslational protein targeting to membrane                         |          |           |             |             |      |      |
| GO:0045047                                                            | 2.00E-14 |           | 102.2902458 | 0.161372915 | 9    | 106  |
| protein targeting to ER                                               |          |           |             |             |      |      |
| GO:0072599                                                            | 2.00E-14 |           | 102.2902458 | 0.161372915 | 9    | 106  |
| establishment of protein localization to endoplasmic reticulum        |          |           |             |             |      |      |
| GO:0070972                                                            | 5.39E-14 |           | 90.95271701 | 0.179641547 | 9    | 118  |
| protein localization to endoplasmic reticulum                         |          |           |             |             |      |      |
| GO:0000184                                                            | 5.82E-14 |           | 90.11958042 | 0.181163933 | 9    | 119  |
| "nuclear-transcribed mRNA catabolic process, nonsense-mediated decay" |          |           |             |             |      |      |

|                                                    |          | STable4_20PerPair |             |   |     |      |
|----------------------------------------------------|----------|-------------------|-------------|---|-----|------|
| GO:0019080                                         | 5.17E-13 | 69.65492958       | 0.229880285 | 9 | 151 |      |
| viral genome expression                            |          |                   |             |   |     |      |
| GO:0019083                                         | 5.17E-13 | 69.65492958       | 0.229880285 | 9 | 151 |      |
| viral transcription                                |          |                   |             |   |     |      |
| GO:0006612                                         | 5.83E-13 | 68.67788462       | 0.232925057 | 9 | 153 |      |
| protein targeting to membrane                      |          |                   |             |   |     |      |
| GO:0043624                                         | 5.83E-13 | 68.67788462       | 0.232925057 | 9 | 153 |      |
| cellular protein complex disassembly               |          |                   |             |   |     |      |
| GO:0043241                                         | 7.82E-13 | 66.35002581       | 0.240536987 | 9 | 158 |      |
| protein complex disassembly                        |          |                   |             |   |     |      |
| GO:0000956                                         | 1.44E-12 | 61.74086538       | 0.257283233 | 9 | 169 |      |
| nuclear-transcribed mRNA catabolic process         |          |                   |             |   |     |      |
| GO:0034623                                         | 1.88E-12 | 59.84895105       | 0.264895163 | 9 | 174 |      |
| cellular macromolecular complex disassembly        |          |                   |             |   |     |      |
| GO:0006402                                         | 2.31E-12 | 58.41602185       | 0.270984707 | 9 | 178 | mRNA |
| catabolic process                                  |          |                   |             |   |     |      |
| GO:0032984                                         | 2.43E-12 | 58.06832579       | 0.272507093 | 9 | 179 |      |
| macromolecular complex disassembly                 |          |                   |             |   |     |      |
| GO:0072594                                         | 7.92E-12 | 50.53491124       | 0.310566743 | 9 | 204 |      |
| establishment of protein localization to organelle |          |                   |             |   |     |      |
| GO:0006401                                         | 8.28E-12 | 50.27354788       | 0.312089129 | 9 | 205 | RNA  |
| catabolic process                                  |          |                   |             |   |     |      |

STable4\_20PerPair

|                                                  |          |             |             |   |     |
|--------------------------------------------------|----------|-------------|-------------|---|-----|
| GO:0019058                                       | 2.42E-11 | 44.3045738  | 0.351671165 | 9 | 231 |
| viral infectious cycle                           |          |             |             |   |     |
| GO:0022415                                       | 6.98E-11 | 39.10573092 | 0.395820358 | 9 | 260 |
| viral reproductive process                       |          |             |             |   |     |
| GO:0071845                                       | 1.53E-10 | 35.63244755 | 0.432357622 | 9 | 284 |
| cellular component disassembly at cellular level |          |             |             |   |     |
| GO:0022411                                       | 1.74E-10 | 35.11166253 | 0.438447166 | 9 | 288 |
| cellular component disassembly                   |          |             |             |   |     |
| GO:0016032                                       | 8.99E-09 | 21.90793596 | 0.686596083 | 9 | 451 |
| viral reproduction                               |          |             |             |   |     |
| GO:0033365                                       | 1.36E-08 | 20.83637268 | 0.720088575 | 9 | 473 |
| protein localization to organelle                |          |             |             |   |     |
| GO:0006605                                       | 1.39E-08 | 20.79007444 | 0.721610961 | 9 | 474 |
| protein targeting                                |          |             |             |   |     |

Tissue: Muscle\_skeletal=>Nerve\_Tibial Type: asymmetric

SourceGene: C10orf107(ENSG00000183346.6)

TargetGeneSet: CELA3A ZBTB40 EFNA1 CACNA1S ACTA1 TEX261 REG1A HTR5BP NEB  
 EXOSC7 RP11 PGM2 TPH2 RPL37 SPINK1 DDX39B RP3 C6orf203  
 PRSS1 PRSS3P2 LOXL2 RPL10AP2 ST13P6 C9orf72 IL15RA IPMK MYPN  
 CYP2C9 NRAP PNLIPRP1 TSPAN9 TMTC3 MYBPC1 MYL2 MEG8 IQGAP1



RPL3L CTD GP2 ATP2A1 STable4\_20PerPair MYH2 MYH1 UNC45B  
 KRT10 TMEM99 CCDC40 ZNF254 CTRB2 RPS4XP17 CKM MYBPC2 TNNC2 PVALB C22orf32  
 MTHFD1P1

| GOBPID                          | Pvalue   | OddsRatio | ExpCount    | Count       | Size | Term |
|---------------------------------|----------|-----------|-------------|-------------|------|------|
| GO:0030049                      | 1.03E-11 |           | 95.31534091 | 0.107951007 | 7    | 39   |
| muscle filament sliding         |          |           |             |             |      |      |
| GO:0033275                      | 1.03E-11 |           | 95.31534091 | 0.107951007 | 7    | 39   |
| actin-myosin filament sliding   |          |           |             |             |      |      |
| GO:0070252                      | 1.80E-11 |           | 87.12727273 | 0.11625493  | 7    | 42   |
| actin-mediated cell contraction |          |           |             |             |      |      |
| GO:0030048                      | 2.20E-10 |           | 58.57400932 | 0.163310498 | 7    | 59   |
| actin filament-based movement   |          |           |             |             |      |      |
| GO:0006936                      | 6.96E-10 |           | 20.643377   | 0.661545914 | 10   | 239  |
| muscle contraction              |          |           |             |             |      |      |
| GO:0003012                      | 1.97E-09 |           | 18.43098958 | 0.736281226 | 10   | 266  |
| muscle system process           |          |           |             |             |      |      |
| GO:0006941                      | 1.88E-06 |           | 29.26734694 | 0.20759809  | 5    | 75   |
| striated muscle contraction     |          |           |             |             |      |      |
| GO:0003009                      | 1.85E-05 |           | 72.94763514 | 0.052591516 | 3    | 19   |
| skeletal muscle contraction     |          |           |             |             |      |      |

STable4\_20PerPair

GO:0030029 1.98E-05 8.247051887 1.195764999 8 432  
actin filament-based process

Tissue: Nerve\_Tibial=>Muscle\_Skeletal Type: asymmetric

SourceGene: CD93(ENSG00000125810.8)

TargetGeneSet: RPL22 RPS27 PEX19 Clorf192 RHOQP2 TFPI PHACTR2  
EEF1A1P6 RP11 HMCN2 RPL7A RPS3AP5 ATP5G2 NCKAP1L UPF3A RPL13  
TLCD2 CLDN7 TIMM13 ATP5SL ZNF630 VDAC1P1 APOOL

| GOBPID     | Pvalue   | OddsRatio | ExpCount    | Count       | Size | Term                                                                         |
|------------|----------|-----------|-------------|-------------|------|------------------------------------------------------------------------------|
| GO:0006612 | 3.57E-09 |           | 72.90816327 | 0.148225036 | 6    | 153<br>protein targeting to membrane                                         |
| GO:0072594 | 2.01E-08 |           | 53.93560606 | 0.197633382 | 6    | 204<br>establishment of protein localization to organelle                    |
| GO:0000184 | 6.57E-08 |           | 69.80019493 | 0.115286139 | 5    | 119<br>"nuclear-transcribed mRNA catabolic process, nonsense-mediated decay" |
| GO:0000956 | 3.79E-07 |           | 48.350271   | 0.163725694 | 5    | 169<br>nuclear-transcribed mRNA catabolic process                            |
| GO:0006402 | 4.90E-07 |           | 45.80603725 | 0.172444814 | 5    | 178 mRNA<br>catabolic process                                                |
| GO:0006401 | 9.87E-07 |           | 39.54722222 | 0.198602173 | 5    | 205 RNA<br>catabolic process                                                 |
| GO:0006415 | 1.40E-06 |           | 65.97701149 | 0.088159989 | 4    | 91<br>translational termination                                              |
| GO:0006414 | 2.49E-06 |           | 56.77623762 | 0.101723064 | 4    | 105<br>translational elongation                                              |
| GO:0006614 | 2.49E-06 |           | 56.77623762 | 0.101723064 | 4    | 105                                                                          |

STable4\_20PerPair

SRP-dependent cotranslational protein targeting to membrane

|                                                                |          |             |             |   |     |
|----------------------------------------------------------------|----------|-------------|-------------|---|-----|
| GO:0006613                                                     | 2.59E-06 | 56.21568627 | 0.102691855 | 4 | 106 |
| cotranslational protein targeting to membrane                  |          |             |             |   |     |
| GO:0045047                                                     | 2.59E-06 | 56.21568627 | 0.102691855 | 4 | 106 |
| protein targeting to ER                                        |          |             |             |   |     |
| GO:0072599                                                     | 2.59E-06 | 56.21568627 | 0.102691855 | 4 | 106 |
| establishment of protein localization to endoplasmic reticulum |          |             |             |   |     |
| GO:0033365                                                     | 2.86E-06 | 22.43576017 | 0.458238184 | 6 | 473 |
| protein localization to organelle                              |          |             |             |   |     |
| GO:0006605                                                     | 2.90E-06 | 22.38621795 | 0.459206975 | 6 | 474 |
| protein targeting                                              |          |             |             |   |     |
| GO:0070972                                                     | 3.97E-06 | 50.25614035 | 0.114317348 | 4 | 118 |
| protein localization to endoplasmic reticulum                  |          |             |             |   |     |
| GO:0019080                                                     | 1.06E-05 | 38.88435374 | 0.146287454 | 4 | 151 |
| viral genome expression                                        |          |             |             |   |     |
| GO:0019083                                                     | 1.06E-05 | 38.88435374 | 0.146287454 | 4 | 151 |
| viral transcription                                            |          |             |             |   |     |
| GO:0006413                                                     | 1.08E-05 | 38.61891892 | 0.147256245 | 4 | 152 |
| translational initiation                                       |          |             |             |   |     |
| GO:0043624                                                     | 1.11E-05 | 38.35704698 | 0.148225036 | 4 | 153 |
| cellular protein complex disassembly                           |          |             |             |   |     |
| GO:0043241                                                     | 1.26E-05 | 37.0987013  | 0.153068992 | 4 | 158 |
| protein complex disassembly                                    |          |             |             |   |     |
| GO:0072321                                                     | 1.83E-05 | 481.0666667 | 0.006781538 | 2 | 7   |
| chaperone-mediated protein transport                           |          |             |             |   |     |
| GO:0034623                                                     | 1.85E-05 | 33.56941176 | 0.168569649 | 4 | 174 |
| cellular macromolecular complex disassembly                    |          |             |             |   |     |

Tissue: Nerve\_Tibial=>Muscle\_Skeletal

Type: asymmetric

SourceGene: ENSG00000239291.1

TargetGeneSet: RPL22 CAMTA1-IT1

CLSTN1  
Page 603

RPS27 PPP1R12B

CICP5

Stable4\_20PerPair

| SH3YL1     | RPS7    | BIRC6                | SMYD5      | RANBP2           | NEB       | TTC21B            | EEF1B2  | UBE2F   | ATG4B             |      |  |
|------------|---------|----------------------|------------|------------------|-----------|-------------------|---------|---------|-------------------|------|--|
| DTYMK      | RP11    | AP2M1                | ZAR1       | HNRPDL           | SUB1      | C5orf28           | CENPH   | FAM174A | TCERG1            | TUBB |  |
| PPIL1      | PPP2R5D | RP1                  | MTRNR2L9   |                  | PHF3      | ARID1B            | MALSU1  | DDX56   | PPIA              |      |  |
| BAIAP2L1   |         | RPS3AP26             |            | CUX1             | SLC13A4   | MLL3              | TNKS    | PCMTD1  | TCEB1             |      |  |
| OTUD6B     | ANXA2P2 | SPTLC1               | DENND1A    | RPL35            | RPL7A     | SVIL              | EIF6    | BCCIP   | TSG101            |      |  |
| RPL18AP3   |         | MED4-AS1             |            | RNF31            | C14orf166 |                   | DYNC1H1 | HERC2   | HERC1             |      |  |
| SNRPA1     | SOX8    | CTD                  | GLOD4      | RPL17P43         |           | SUPT6H            | TNRC6C  | WDR45L  | IER3IP1           |      |  |
| C18orf32   |         | TXNL4A               | GADD45GIP1 |                  | ZNF486    | RPSAP58           | TSHZ3   | RYR1    | RPS19             | RPS5 |  |
| EIF2S2     | PPIAP22 | C21orf119            |            | ERVH48-1         |           | SF3A1             | RBX1    | DMD-AS2 | ITIH6             |      |  |
| CXorf26    | RPL39   | RPL10                |            |                  |           |                   |         |         |                   |      |  |
| GOBPID     | Pvalue  | OddsRatio            |            | ExpCount         |           | Count             | Size    |         | Term              |      |  |
| GO:0006414 |         | 7.31754245214919e-11 |            | 25.0631578947368 |           |                   |         |         | 0.508615320739049 |      |  |
| 10         | 105     |                      |            |                  |           |                   |         |         |                   |      |  |
| GO:0006415 |         | 4.93542301124678e-10 |            | 25.7279088364654 |           |                   |         |         | 0.440799944640509 |      |  |
| 9          | 91      |                      |            |                  |           |                   |         |         |                   |      |  |
| GO:0019058 |         | 9.82518356581008e-10 |            | 13.3793103448276 |           |                   |         |         | 1.11895370562591  |      |  |
| 12         | 231     |                      |            |                  |           |                   |         |         |                   |      |  |
| GO:0006614 |         | 1.79383947513436e-09 |            | 21.9544057377049 |           |                   |         |         | 0.508615320739049 |      |  |
| 9          | 105     |                      |            |                  |           |                   |         |         |                   |      |  |
| GO:0006613 |         | 1.95280987937582e-09 |            | 21.7265506168667 |           |                   |         |         | 0.513459276174659 |      |  |
| 9          | 106     |                      |            |                  |           |                   |         |         |                   |      |  |
| GO:0045047 |         | 1.95280987937582e-09 |            | 21.7265506168667 |           |                   |         |         | 0.513459276174659 |      |  |
| 9          | 106     |                      |            |                  |           |                   |         |         |                   |      |  |
| GO:0072599 |         | 1.95280987937582e-09 |            | 21.7265506168667 |           |                   |         |         | 0.513459276174659 |      |  |
| 9          | 106     |                      |            |                  |           |                   |         |         |                   |      |  |
| GO:0019080 |         | 2.66776487282486e-09 |            | 16.8321513002364 |           |                   |         |         | 0.731437270777109 |      |  |
| 10         | 151     |                      |            |                  |           |                   |         |         |                   |      |  |
| GO:0019083 |         | 2.66776487282486e-09 |            | 16.8321513002364 |           |                   |         |         | 0.731437270777109 |      |  |
| 10         | 151     |                      |            |                  |           |                   |         |         |                   |      |  |
| GO:0006413 |         | 2.84480329887681e-09 |            | 16.712441314554  |           | 0.736281226212719 |         |         |                   | 10   |  |
| 152        |         |                      |            |                  |           |                   |         |         |                   |      |  |
| GO:0016032 |         | 3.07835109852793e-09 |            | 8.72289407839867 |           |                   |         |         | 2.18462390146011  |      |  |
| 15         | 451     |                      |            |                  |           |                   |         |         |                   |      |  |
| GO:0022415 |         | 3.76473354170724e-09 |            | 11.7906006674082 |           |                   |         |         | 1.2594284132586   | 12   |  |
| 260        |         |                      |            |                  |           |                   |         |         |                   |      |  |
| GO:0070972 |         | 5.0787447552387e-09  |            | 19.3183937434201 |           |                   |         |         | 0.571586741401979 |      |  |
| 9          | 118     |                      |            |                  |           |                   |         |         |                   |      |  |
| GO:0000184 |         | 5.47334037527631e-09 |            | 19.1414307004471 |           |                   |         |         | 0.576430696837589 |      |  |
| 9          | 119     |                      |            |                  |           |                   |         |         |                   |      |  |
| GO:0006612 |         | 4.95047982223002e-08 |            | 14.5870901639344 |           |                   |         |         | 0.741125181648329 |      |  |
| 9          | 153     |                      |            |                  |           |                   |         |         |                   |      |  |
| GO:0043624 |         | 4.95047982223002e-08 |            | 14.5870901639344 |           |                   |         |         | 0.741125181648329 |      |  |
| 9          | 153     |                      |            |                  |           |                   |         |         |                   |      |  |
| GO:0043241 |         | 6.53728633758801e-08 |            | 14.0926394542854 |           |                   |         |         | 0.765344958826379 |      |  |
| 9          | 158     |                      |            |                  |           |                   |         |         |                   |      |  |
| GO:0000956 |         | 1.16648791459562e-07 |            | 13.1136270491803 |           |                   |         |         | 0.818628468618089 |      |  |
| 9          | 169     |                      |            |                  |           |                   |         |         |                   |      |  |
| GO:0022613 |         | 1.20242275180982e-07 |            | 10.9813953488372 |           |                   |         |         | 1.08988997301225  |      |  |
| 10         | 225     |                      |            |                  |           |                   |         |         |                   |      |  |
| GO:0034623 |         | 1.49724472349781e-07 |            | 12.7117734724292 |           |                   |         |         | 0.842848245796139 |      |  |
| 9          | 174     |                      |            |                  |           |                   |         |         |                   |      |  |
| GO:0006402 |         | 1.81792370708096e-07 |            | 12.407411000097  |           | 0.862224067538579 |         |         |                   | 9    |  |
| 178        |         |                      |            |                  |           |                   |         |         |                   |      |  |
| GO:0032984 |         | 1.90686320250573e-07 |            | 12.3335583413693 |           |                   |         |         | 0.867068022974189 |      |  |
| 9          | 179     |                      |            |                  |           |                   |         |         |                   |      |  |
| GO:0071843 |         | 2.11000230823148e-07 |            | 10.2998544395924 |           |                   |         |         | 1.15770534911079  |      |  |
| 10         | 239     |                      |            |                  |           |                   |         |         |                   |      |  |
| GO:0072594 |         | 5.76541966419243e-07 |            | 10.7334174022699 |           |                   |         |         | 0.988166908864438 |      |  |
| 9          | 204     |                      |            |                  |           |                   |         |         |                   |      |  |
| GO:0006401 |         | 6.00713892035634e-07 |            | 10.6779023084644 |           |                   |         |         | 0.993010864300048 |      |  |
| 9          | 205     |                      |            |                  |           |                   |         |         |                   |      |  |
| GO:0071845 |         | 8.77339691245854e-06 |            | 7.5680476900149  |           | 1.37568334371324  |         |         |                   | 9    |  |
| 284        |         |                      |            |                  |           |                   |         |         |                   |      |  |
|            |         |                      |            |                  |           |                   |         |         |                   |      |  |

Stable4\_20PerPair

|                |                                                                         |                  |                   |    |
|----------------|-------------------------------------------------------------------------|------------------|-------------------|----|
| GO:0022411     | 9.81661683224337e-06                                                    | 7.4574299312533  | 1.39505916545568  | 9  |
| 288            | cellular component disassembly                                          |                  |                   |    |
| GO:0033365     | 1.55450055012712e-05                                                    | 5.61702986279257 | 2.29119092104353  |    |
| 11             | 473 protein localization to organelle                                   |                  |                   |    |
| Tissue:        | Nerve_Tibial=>Muscle_skeletal                                           | Type:            | asymmetric        |    |
| SourceGene:    | ENSG00000239791.1                                                       |                  |                   |    |
| TargetGeneSet: | SEPN1 RP11 RPLP0P6 ZAP70 RPL37A PPIAP16 RPL35A RPL34                    |                  |                   |    |
| RPS23          | CTD RPL39P3 RPL7 GS1 AQP9 RPL35 RPL13AP5 RPLP2                          |                  |                   |    |
| ORAOV1         | ST13P11 SLC11A2 RPS29 PLEKHD1 C15orf52 RPS3AP6 ZNF774 PDZD9             |                  |                   |    |
| RPL27          | S1PR4 WIZ REPS2 RP13 RP3 RPL10                                          |                  |                   |    |
| GOBPID         | Pvalue OddsRatio ExpCount Count Size Term                               |                  |                   |    |
| GO:0006414     | 2.1887296438331e-18                                                     | 139.781914893617 | 0.167116462528545 |    |
| 11             | 105 translational elongation                                            |                  |                   |    |
| GO:0006415     | 6.30555352061827e-17                                                    | 136.24881291548  | 0.144834267524739 | 10 |
| 91             | translational termination                                               |                  |                   |    |
| GO:0006614     | 2.79796175290637e-16                                                    | 116.056680161943 | 0.167116462528545 |    |
| 10             | 105 SRP-dependent cotranslational protein targeting to membrane         |                  |                   |    |
| GO:0006613     | 3.08687413255169e-16                                                    | 114.839743589744 | 0.168708047885959 |    |
| 10             | 106 cotranslational protein targeting to membrane                       |                  |                   |    |
| GO:0045047     | 3.08687413255169e-16                                                    | 114.839743589744 | 0.168708047885959 |    |
| 10             | 106 protein targeting to ER                                             |                  |                   |    |
| GO:0072599     | 3.08687413255169e-16                                                    | 114.839743589744 | 0.168708047885959 |    |
| 10             | 106 establishment of protein localization to endoplasmic reticulum      |                  |                   |    |
| GO:0070972     | 9.35135241104897e-16                                                    | 101.994301994302 | 0.187807072174936 |    |
| 10             | 118 protein localization to endoplasmic reticulum                       |                  |                   |    |
| GO:0000184     | 1.02008682585083e-15                                                    | 101.051517290049 | 0.189398657532351 |    |
| 10             | 119 nuclear-transcribed mRNA catabolic process, nonsense-mediated decay |                  |                   |    |
| GO:0019080     | 1.16958569994575e-14                                                    | 77.9432624113475 | 0.240329388969621 |    |
| 10             | 151 viral genome expression                                             |                  |                   |    |
| GO:0019083     | 1.16958569994575e-14                                                    | 77.9432624113475 | 0.240329388969621 |    |
| 10             | 151 viral transcription                                                 |                  |                   |    |
| GO:0006413     | 1.25091808835343e-14                                                    | 77.3889490790899 | 0.241920974327036 |    |
| 10             | 152 translational initiation                                            |                  |                   |    |
| GO:0006612     | 1.33729070090369e-14                                                    | 76.8423883808499 | 0.243512559684451 |    |
| 10             | 153 protein targeting to membrane                                       |                  |                   |    |
| GO:0043624     | 1.33729070090369e-14                                                    | 76.8423883808499 | 0.243512559684451 |    |
| 10             | 153 cellular protein complex disassembly                                |                  |                   |    |
| GO:0043241     | 1.85483238175808e-14                                                    | 74.2203742203742 | 0.251470486471524 |    |
| 10             | 158 protein complex disassembly                                         |                  |                   |    |
| GO:0000956     | 3.6731013503907e-14                                                     | 69.0324141267537 | 0.268977925403086 |    |
| 10             | 169 nuclear-transcribed mRNA catabolic process                          |                  |                   |    |
| GO:0034623     | 4.93531947415089e-14                                                    | 66.9043151969981 | 0.27693585219016  |    |
| 10             | 174 cellular macromolecular complex disassembly                         |                  |                   |    |
| GO:0006402     | 6.21163297175937e-14                                                    | 65.2930402930403 | 0.283302193619819 |    |
| 10             | 178 mRNA catabolic process                                              |                  |                   |    |
| GO:0032984     | 6.57374934802155e-14                                                    | 64.9021392808375 | 0.284893778977233 |    |
| 10             | 179 macromolecular complex disassembly                                  |                  |                   |    |
| GO:0072594     | 2.45722623718009e-13                                                    | 56.4393338620143 | 0.324683412912601 |    |
| 10             | 204 establishment of protein localization to organelle                  |                  |                   |    |
| GO:0006401     | 2.58110034705589e-13                                                    | 56.1459566074951 | 0.326274998270016 |    |
| 10             | 205 RNA catabolic process                                               |                  |                   |    |
| GO:0019058     | 8.55234752637089e-13                                                    | 49.4500522102332 | 0.367656217562798 |    |
| 10             | 231 viral infectious cycle                                              |                  |                   |    |
| GO:0022415     | 2.78571752229051e-12                                                    | 43.6246153846154 | 0.413812192927825 |    |
| 10             | 260 viral reproductive process                                          |                  |                   |    |
| GO:0071845     | 6.70239269057421e-12                                                    | 39.7361033127456 | 0.452010241505778 |    |
| 10             | 284 cellular component disassembly at cellular level                    |                  |                   |    |
| GO:0022411     | 7.70023687149939e-12                                                    | 39.1532927504151 | 0.458376582935437 |    |
| 10             | 288 cellular component disassembly                                      |                  |                   |    |
| GO:0016032     | 6.31199390872842e-10                                                    | 24.397348683063  | 0.717804996194035 | 10 |
| 451            | viral reproduction                                                      |                  |                   |    |
| GO:0033365     | 1.00237370241577e-09                                                    | 23.2015284931052 | 0.752819874057159 |    |
| 10             | 473 protein localization to organelle                                   |                  |                   |    |

STable4\_20PerPair

GO:0006605 1.02311616145228e-09 23.1498673740053 0.754411459414573  
 10 474 protein targeting  
 Tissue: Nerve\_Tibial=>Muscle\_Skeletal Type: asymmetric

SourceGene: FBXO18(ENSG00000134452.12) "F-box protein, helicase, 18"

TargetGeneSet: ACAP3 OTUD3 HP1BP3 C1orf63 TRAPPC3 ERMAP PPAP2B ACTG1P4 RP11  
 RC3H1 UCHL5 WNT9A RPLP0P6 LINC00152 MCM6 RFTN2 RPL37A SLC23A3  
 IL17RC ACAA1 KIAA1143 PTPLB CCNL1 MYL5 AADAT RANBP3L RPS23 CTD  
 GCNT2 CDKAL1 STK19 AGER NOTCH4 RPL10A SNHG5 ELMO1 GNRH1 NR6A1 BMI1  
 USP54 FGFBP3 RPL13AP5 PIDD RPLP2 TNNT3 MEN1 NADSYN1 MSANTD2 ANO2  
 FGFR1OP2 PUS7L SLC11A2 RPS29 PIAS1 PRC1 RPS15A GDPD3 C16orf57  
 NFAT5 CCL16 RPL27 RPS15 PDE4A RPS16 CARD8 RPS5P2 ACRC FERP1  
 LINC00087

| GOBPID                   | Pvalue   | OddsRatio | ExpCount    | Count       | Size | Term |
|--------------------------|----------|-----------|-------------|-------------|------|------|
| GO:0006414               | 3.25E-12 |           | 35.84962406 | 0.377828524 | 10   | 105  |
| translational elongation |          |           |             |             |      |      |

|                           |          |  |             |             |   |    |
|---------------------------|----------|--|-------------|-------------|---|----|
| GO:0006415                | 3.06E-11 |  | 36.54367555 | 0.327451387 | 9 | 91 |
| translational termination |          |  |             |             |   |    |

|                                                             |          |  |             |             |   |     |
|-------------------------------------------------------------|----------|--|-------------|-------------|---|-----|
| GO:0006614                                                  | 1.13E-10 |  | 31.18386628 | 0.377828524 | 9 | 105 |
| SRP-dependent cotranslational protein targeting to membrane |          |  |             |             |   |     |

|            |          |  |             |             |   |     |
|------------|----------|--|-------------|-------------|---|-----|
| GO:0006613 | 1.23E-10 |  | 30.86022537 | 0.381426891 | 9 | 106 |
|------------|----------|--|-------------|-------------|---|-----|

STable4\_20PerPair

cotranslational protein targeting to membrane

|                                                                       |          |             |             |    |     |      |
|-----------------------------------------------------------------------|----------|-------------|-------------|----|-----|------|
| GO:0045047                                                            | 1.23E-10 | 30.86022537 | 0.381426891 | 9  | 106 |      |
| protein targeting to ER                                               |          |             |             |    |     |      |
| GO:0072599                                                            | 1.23E-10 | 30.86022537 | 0.381426891 | 9  | 106 |      |
| establishment of protein localization to endoplasmic reticulum        |          |             |             |    |     |      |
| GO:0070972                                                            | 3.25E-10 | 27.4397269  | 0.424607294 | 9  | 118 |      |
| protein localization to endoplasmic reticulum                         |          |             |             |    |     |      |
| GO:0000184                                                            | 3.50E-10 | 27.18837209 | 0.428205661 | 9  | 119 |      |
| "nuclear-transcribed mRNA catabolic process, nonsense-mediated decay" |          |             |             |    |     |      |
| GO:0000956                                                            | 3.79E-10 | 21.32374963 | 0.608124005 | 10 | 169 |      |
| nuclear-transcribed mRNA catabolic process                            |          |             |             |    |     |      |
| GO:0006402                                                            | 6.31E-10 | 20.16865079 | 0.640509307 | 10 | 178 | mRNA |
| catabolic process                                                     |          |             |             |    |     |      |
| GO:0006401                                                            | 2.50E-09 | 17.34310134 | 0.737665213 | 10 | 205 | RNA  |
| catabolic process                                                     |          |             |             |    |     |      |

STable4\_20PerPair

|                                             |          |             |             |   |     |
|---------------------------------------------|----------|-------------|-------------|---|-----|
| GO:0019080                                  | 2.93E-09 | 21.01424828 | 0.543353401 | 9 | 151 |
| viral genome expression                     |          |             |             |   |     |
| GO:0019083                                  | 2.93E-09 | 21.01424828 | 0.543353401 | 9 | 151 |
| viral transcription                         |          |             |             |   |     |
| GO:0006413                                  | 3.11E-09 | 20.86583184 | 0.546951768 | 9 | 152 |
| translational initiation                    |          |             |             |   |     |
| GO:0006612                                  | 3.29E-09 | 20.71947674 | 0.550550135 | 9 | 153 |
| protein targeting to membrane               |          |             |             |   |     |
| GO:0043624                                  | 3.29E-09 | 20.71947674 | 0.550550135 | 9 | 153 |
| cellular protein complex disassembly        |          |             |             |   |     |
| GO:0043241                                  | 4.37E-09 | 20.01716872 | 0.568541969 | 9 | 158 |
| protein complex disassembly                 |          |             |             |   |     |
| GO:0034623                                  | 1.02E-08 | 18.05581395 | 0.62611584  | 9 | 174 |
| cellular macromolecular complex disassembly |          |             |             |   |     |



STable4\_20PerPair

|                                                    |          |             |             |    |     |
|----------------------------------------------------|----------|-------------|-------------|----|-----|
| GO:0032984                                         | 1.31E-08 | 17.51860465 | 0.644107674 | 9  | 179 |
| macromolecular complex disassembly                 |          |             |             |    |     |
| GO:0072594                                         | 4.06E-08 | 15.24579606 | 0.734066847 | 9  | 204 |
| establishment of protein localization to organelle |          |             |             |    |     |
| GO:0019058                                         | 1.18E-07 | 13.36612194 | 0.831222753 | 9  | 231 |
| viral infectious cycle                             |          |             |             |    |     |
| GO:0022415                                         | 3.22E-07 | 11.79764662 | 0.935575393 | 9  | 260 |
| viral reproductive process                         |          |             |             |    |     |
| GO:0071845                                         | 6.76E-07 | 10.74976744 | 1.021936198 | 9  | 284 |
| cellular component disassembly at cellular level   |          |             |             |    |     |
| GO:0022411                                         | 7.60E-07 | 10.59264816 | 1.036329666 | 9  | 288 |
| cellular component disassembly                     |          |             |             |    |     |
| GO:0016032                                         | 3.87E-06 | 7.53590325  | 1.62286347  | 10 | 451 |
| viral reproduction                                 |          |             |             |    |     |

STable4\_20PerPair

Tissue: Nerve\_Tibial=>Muscle\_Skeletal Type: asymmetric

SourceGene: GORASP1(ENSG00000114745.9) "golgi reassembly stacking protein 1, 65kDa"

TargetGeneSet: RPL22 SFN RP4 MFI2 RPL5 RP11 AP4B1 TMEM79  
 SUPT7L OLA1 RPL15 PROK2 RPL34 SPOCK3 CENPH CTD CTB HCG27 RPL7  
 EIF3E EIF3H RPS24 PCNXL3 CCND1 RPS25 DNAJC3 TRAPPC6B RPL4  
 LINGO1 TMEM104 RDH13 PRDX4

| GOBPID     | Pvalue   | OddsRatio | ExpCount    | Count       | Size | Term                                                                         |
|------------|----------|-----------|-------------|-------------|------|------------------------------------------------------------------------------|
| GO:0006413 | 8.90E-14 |           | 59.16321458 | 0.283994187 | 10   | 152<br>translational initiation                                              |
| GO:0000184 | 5.30E-13 |           | 65.06363636 | 0.222337554 | 9    | 119<br>"nuclear-transcribed mRNA catabolic process, nonsense-mediated decay" |
| GO:0006415 | 3.64E-12 |           | 72.75079264 | 0.170022836 | 8    | 91<br>translational termination                                              |
| GO:0006414 | 1.17E-11 |           | 62.18990776 | 0.196180195 | 8    | 105<br>translational elongation                                              |
| GO:0006614 | 1.17E-11 |           | 62.18990776 | 0.196180195 | 8    | 105<br>SRP-dependent cotranslational protein targeting to membrane           |
| GO:0006613 | 1.27E-11 |           | 61.55102041 | 0.198048578 | 8    | 106<br>cotranslational protein targeting to membrane                         |
| GO:0045047 | 1.27E-11 |           | 61.55102041 | 0.198048578 | 8    | 106<br>protein targeting to ER                                               |
| GO:0072599 | 1.27E-11 |           | 61.55102041 | 0.198048578 | 8    | 106<br>establishment of protein localization to endoplasmic reticulum        |

STable4\_20PerPair

|                                                    |          |             |             |   |     |      |
|----------------------------------------------------|----------|-------------|-------------|---|-----|------|
| GO:0000956                                         | 1.29E-11 | 44.575      | 0.315756695 | 9 | 169 |      |
| nuclear-transcribed mRNA catabolic process         |          |             |             |   |     |      |
| GO:0006402                                         | 2.06E-11 | 42.17455621 | 0.33257214  | 9 | 178 | mRNA |
| catabolic process                                  |          |             |             |   |     |      |
| GO:0070972                                         | 3.03E-11 | 54.79043062 | 0.220469172 | 8 | 118 |      |
| protein localization to endoplasmic reticulum      |          |             |             |   |     |      |
| GO:0006401                                         | 7.33E-11 | 36.29591837 | 0.383018476 | 9 | 205 | RNA  |
| catabolic process                                  |          |             |             |   |     |      |
| GO:0019080                                         | 2.21E-10 | 42.0493191  | 0.282125804 | 8 | 151 |      |
| viral genome expression                            |          |             |             |   |     |      |
| GO:0019083                                         | 2.21E-10 | 42.0493191  | 0.282125804 | 8 | 151 |      |
| viral transcription                                |          |             |             |   |     |      |
| GO:0006612                                         | 2.46E-10 | 41.46352087 | 0.28586257  | 8 | 153 |      |
| protein targeting to membrane                      |          |             |             |   |     |      |
| GO:0043624                                         | 2.46E-10 | 41.46352087 | 0.28586257  | 8 | 153 |      |
| cellular protein complex disassembly               |          |             |             |   |     |      |
| GO:0043241                                         | 3.18E-10 | 40.06736842 | 0.295204484 | 8 | 158 |      |
| protein complex disassembly                        |          |             |             |   |     |      |
| GO:0034623                                         | 6.87E-10 | 36.16487001 | 0.325098609 | 8 | 174 |      |
| cellular macromolecular complex disassembly        |          |             |             |   |     |      |
| GO:0032984                                         | 8.60E-10 | 35.09510619 | 0.334440523 | 8 | 179 |      |
| macromolecular complex disassembly                 |          |             |             |   |     |      |
| GO:0072594                                         | 2.42E-09 | 30.56498389 | 0.381150093 | 8 | 204 |      |
| establishment of protein localization to organelle |          |             |             |   |     |      |
| GO:0019058                                         | 6.45E-09 | 26.81331131 | 0.431596429 | 8 | 231 |      |
| viral infectious cycle                             |          |             |             |   |     |      |

STable4\_20PerPair

|                                                  |          |             |             |   |     |
|--------------------------------------------------|----------|-------------|-------------|---|-----|
| GO:0022415                                       | 1.63E-08 | 23.67919799 | 0.485779531 | 8 | 260 |
| viral reproductive process                       |          |             |             |   |     |
| GO:0071845                                       | 3.24E-08 | 21.58352403 | 0.530620718 | 8 | 284 |
| cellular component disassembly at cellular level |          |             |             |   |     |
| GO:0022411                                       | 3.61E-08 | 21.26917293 | 0.53809425  | 8 | 288 |
| cellular component disassembly                   |          |             |             |   |     |
| GO:0033365                                       | 1.11E-07 | 15.04310345 | 0.88374507  | 9 | 473 |
| protein localization to organelle                |          |             |             |   |     |
| GO:0006605                                       | 1.13E-07 | 15.00967742 | 0.885613452 | 9 | 474 |
| protein targeting                                |          |             |             |   |     |
| GO:0016032                                       | 1.11E-06 | 13.28834502 | 0.842640648 | 8 | 451 |
| viral reproduction                               |          |             |             |   |     |

Tissue: Nerve\_Tibial=>Muscle\_skeletal Type: asymmetric

SourceGene: HMG5(ENSG00000198157.6)

TargetGeneSet: RPL22 AGTRAP C1orf144 HMG2 MRPS15 RSP01 KIAA0494

ZFYVE9 FOXD3 RABGGTB RP11 AGL HBXIP HIPK1 RPS27 ATP8B2 FAM189B HCN3

CCT3 XPR1 LINC00467 SRP9 C1orf95 SRSF7 COX7A2L RHOQ CCT4

MKI67IP HSPD1 HSPE1 CLN5 ITPR1 RPL15 LAMB2 RPL24 MYLK MAP6D1 ADD1

SLIT2 PDE5A RPS3A SORBS2 RBBP4P1 NDUFS4 PTC2 BTF3 TBCA CTB

SLIT1 KCNMB1 NPM1 RPL26L1 LRRC16A RPL10A TBX18 AKD1 RPF2 RP3 TRDN

LTV1 TAB2 FNDC1 PSMB1 SDK1 EEF1A1P6 MRPL32 SEC61G RPS3AP26

ZSCAN21 FIS1 MRPS33 KRBA1 SFTPC SCARA5 HOOK3 MRPS35 WWP1 EIF3E

TTC35 KIAA0020 NTRK2 RPL35 RPL7A DNLZ EDF1 CAMK1D COMMD3

TIMM23 HK1 RPS24 RPS3AP5 SFXN4 IGF2 STIM1 TMEM109 MRPL21 LAMTOR1

TMEM126A SNORA8 PHLDB1 SOX5 POLR2KP1 IKZF4 RNF41 SDSL

CCDC92 PUS1 IFT88 MRP63 PRMT5-AS1 C14orf166 ACTN1 BCRP2

SRP14 JMJD8 LYRM1 HMG2P3 TGFB1I1 PARD6A GABARAPL2 WWOX GCSH

C1QBP STX8 KCNJ12 STAC2 VAT1 ANKRD40 MSI2 SRSF1 SLC16A5 TRAPPC8

C18orf21 CNN1 FAM71E1 TSEN34 PPP6R1 SNRPB2 AHCY MYL9 CHD6

TCP10L MRPL40 FOXRED2 NHP2L1 ATXN10 ZC3H12B HMG5 TRMT2B BEX2 DOCK11

SLC9A6

| GOBPID     | Pvalue | OddsRatio | ExpCount             | Count            | Size              | Term                                                           |
|------------|--------|-----------|----------------------|------------------|-------------------|----------------------------------------------------------------|
| GO:0006614 | 13     | 105       | 5.73767343535094e-12 | 17.9582686335404 | 0.908241644176874 | SRP-dependent cotranslational protein targeting to membrane    |
| GO:0006613 | 106    | 106       | 6.49249560224171e-12 | 17.763920890937  | 0.916891564597606 | cotranslational protein targeting to membrane                  |
| GO:0045047 | 106    | 106       | 6.49249560224171e-12 | 17.763920890937  | 0.916891564597606 | protein targeting to ER                                        |
| GO:0072599 | 106    | 106       | 6.49249560224171e-12 | 17.763920890937  | 0.916891564597606 | establishment of protein localization to endoplasmic reticulum |
| GO:0070972 | 13     | 118       | 2.60182755677225e-11 | 15.7204931972789 | 1.02069060964639  | protein localization to endoplasmic reticulum                  |

Stable4\_20PerPair

|                                                     |                      |                                                                     |                   |
|-----------------------------------------------------|----------------------|---------------------------------------------------------------------|-------------------|
| GO:0006414                                          | 1.01566689419554e-10 | 16.2523551241793                                                    | 0.908241644176874 |
| 12                                                  | 105                  | translational elongation                                            |                   |
| GO:0006612                                          | 6.94494928981492e-10 | 11.7613520408163                                                    | 1.32343782437202  |
| 13                                                  | 153                  | protein targeting to membrane                                       |                   |
| GO:0006415                                          | 5.79974161324413e-09 | 15.2925389157273                                                    | 0.787142758286624 |
| 10                                                  | 91                   | translational termination                                           |                   |
| GO:0000184                                          | 6.22590156196839e-09 | 12.7028914879792                                                    | 1.02934053006712  |
| 11                                                  | 119                  | nuclear-transcribed mRNA catabolic process, nonsense-mediated decay |                   |
| GO:0043624                                          | 8.10272368894881e-09 | 10.6834871022406                                                    | 1.32343782437202  |
| 12                                                  | 153                  | cellular protein complex disassembly                                |                   |
| GO:0043241                                          | 1.16593388123638e-08 | 10.3139774518123                                                    | 1.36668742647568  |
| 12                                                  | 158                  | protein complex disassembly                                         |                   |
| GO:0072594                                          | 2.3080843883101e-08  | 8.58989341810022                                                    | 1.76458376582935  |
| 13                                                  | 204                  | establishment of protein localization to organelle                  |                   |
| GO:0034623                                          | 3.43845483812788e-08 | 9.28482464765651                                                    | 1.50508615320739  |
| 12                                                  | 174                  | cellular macromolecular complex disassembly                         |                   |
| GO:0032984                                          | 4.71013040491334e-08 | 9.00365640400615                                                    | 1.54833575531105  |
| 12                                                  | 179                  | macromolecular complex disassembly                                  |                   |
| GO:0006413                                          | 8.04011240743188e-08 | 9.70729127783999                                                    | 1.31478790395128  |
| 11                                                  | 152                  | translational initiation                                            |                   |
| GO:0000956                                          | 2.36908829095149e-07 | 8.65245391960915                                                    | 1.46183655110373  |
| 11                                                  | 169                  | nuclear-transcribed mRNA catabolic process                          |                   |
| GO:0006402                                          | 3.9945788384366e-07  | 8.18095388171026                                                    | 1.53968583489032  |
| 11                                                  | 178                  | mRNA catabolic process                                              |                   |
| GO:0019080                                          | 7.30958509555701e-07 | 8.74807277212458                                                    | 1.30613798353055  |
| 10                                                  | 151                  | viral genome expression                                             |                   |
| GO:0019083                                          | 7.30958509555701e-07 | 8.74807277212458                                                    | 1.30613798353055  |
| 10                                                  | 151                  | viral transcription                                                 |                   |
| GO:0019058                                          | 7.5054439855748e-07  | 6.8405867377864                                                     | 1.99813161718912  |
| 231                                                 |                      | viral infectious cycle                                              | 12                |
| GO:0006401                                          | 1.61889016522879e-06 | 7.02893832519443                                                    | 1.77323368625009  |
| 11                                                  | 205                  | RNA catabolic process                                               |                   |
| GO:0022415                                          | 2.59639333784596e-06 | 6.0282614901513                                                     | 2.24897930939035  |
| 260                                                 |                      | viral reproductive process                                          | 12                |
| GO:0071845                                          | 6.43058633558557e-06 | 5.48698594482041                                                    | 2.45657739948792  |
| 12                                                  | 284                  | cellular component disassembly at cellular level                    |                   |
| GO:0022411                                          | 7.41205255207756e-06 | 5.40592535590612                                                    | 2.49117708117085  |
| 12                                                  | 288                  | cellular component disassembly                                      |                   |
| GO:0016032                                          | 8.03903518619091e-06 | 4.34424520433695                                                    | 3.90111410975019  |
| 15                                                  | 451                  | viral reproduction                                                  |                   |
| GO:0033365                                          | 1.41529228327999e-05 | 4.12901945216356                                                    | 4.0914123590063   |
| 473                                                 |                      | protein localization to organelle                                   | 15                |
| Tissue: Nerve_Tibial=>Muscle_Skeletal Type: cluster |                      |                                                                     |                   |

SourceGene: HMG5(ENSG00000198157.6) high mobility group nucleosome binding domain 5

STable4\_20PerPair

TargetGeneSet: RPL22 AGTRAP C1orf144 HMG2 MRPS15 RSP01 KIAA0494  
 ZFYVE9 FOXD3 RABGGTB RP11 AGL HBXIP HIPK1 RPS27 ATP8B2 FAM189B HCN3  
 CCT3 XPR1 LINC00467 SRP9 C1orf95 SRSF7 COX7A2L RHOQ CCT4  
 MKI67IP HSPD1 HSPE1 CLN5 ITPR1 RPL15 LAMB2 RPL24 MYLK MAP6D1 ADD1  
 SLIT2 PDE5A RPS3A SORBS2 RBBP4P1 NDUFS4 PTC2 BTFF3 TBCA CTB  
 SLIT1 KCNMB1 NPM1 RPL26L1 LRRRC16A RPL10A TBX18 AKD1 RPF2 RP3 TRDN  
 LTV1 TAB2 FNDC1 PSMB1 SDK1 EEF1A1P6 MRPL32 SEC61G RPS3AP26  
 ZSCAN21 FIS1 MRPS33 KRBA1 SFTPC SCARA5 HOOK3 MRPS35 WWP1 EIF3E  
 TTC35 KIAA0020 NTRK2 RPL35 RPL7A DNLZ EDF1 CAMK1D COMMD3  
 TIMM23 HK1 RPS24 RPS3AP5 SFXN4 IGF2 STIM1 TMEM109 MRPL21 LAMTOR1  
 TMEM126A SNORA8 PHLDB1 SOX5 POLR2KP1 IKZF4 RNF41 SDSL  
 CCDC92 PUS1 IFT88 MRP63 PRMT5-AS1 C14orf166 ACTN1 BCRP2  
 SRP14 JMJD8 LYRM1 HMG2P3 TGFB1I1 PARD6A GABARAPL2 WWOX GCSH  
 C1QBP STX8 KCNJ12 STAC2 VAT1 ANKRD40 MSI2 SRSF1 SLC16A5 TRAPPC8  
 C18orf21 CNN1 FAM71E1 TSEN34 PPP6R1 SNRPB2 AHCY MYL9 CHD6  
 TCP10L MRPL40 FOXRED2 NHP2L1 ATXN10 ZC3H12B HMG5 TRMT2B BEX2 DOCK11  
 SLC9A6

GOBPID Pvalue OddsRatio ExpCount Count Size Term

GO:0006614 5.74E-12 17.95826863 0.908241644 13 105  
 SRP-dependent cotranslational protein targeting to membrane

GO:0006613 6.49E-12 17.76392089 0.916891565 13 106  
 cotranslational protein targeting to membrane

STable4\_20PerPair

|                         |          |             |             |    |     |
|-------------------------|----------|-------------|-------------|----|-----|
| GO:0045047              | 6.49E-12 | 17.76392089 | 0.916891565 | 13 | 106 |
| protein targeting to ER |          |             |             |    |     |

|                                                                |          |             |             |    |     |
|----------------------------------------------------------------|----------|-------------|-------------|----|-----|
| GO:0072599                                                     | 6.49E-12 | 17.76392089 | 0.916891565 | 13 | 106 |
| establishment of protein localization to endoplasmic reticulum |          |             |             |    |     |

|                                               |          |            |            |    |     |
|-----------------------------------------------|----------|------------|------------|----|-----|
| GO:0070972                                    | 2.60E-11 | 15.7204932 | 1.02069061 | 13 | 118 |
| protein localization to endoplasmic reticulum |          |            |            |    |     |

|            |          |             |             |    |     |
|------------|----------|-------------|-------------|----|-----|
| GO:0006414 | 1.02E-10 | 16.25235512 | 0.908241644 | 12 | 105 |
|------------|----------|-------------|-------------|----|-----|

translational elongation

STable4\_20PerPair

|                               |          |             |             |    |     |
|-------------------------------|----------|-------------|-------------|----|-----|
| GO:0006612                    | 6.94E-10 | 11.76135204 | 1.323437824 | 13 | 153 |
| protein targeting to membrane |          |             |             |    |     |

|                           |          |             |             |    |    |
|---------------------------|----------|-------------|-------------|----|----|
| GO:0006415                | 5.80E-09 | 15.29253892 | 0.787142758 | 10 | 91 |
| translational termination |          |             |             |    |    |

|                                                                       |          |             |            |    |     |
|-----------------------------------------------------------------------|----------|-------------|------------|----|-----|
| GO:0000184                                                            | 6.23E-09 | 12.70289149 | 1.02934053 | 11 | 119 |
| "nuclear-transcribed mRNA catabolic process, nonsense-mediated decay" |          |             |            |    |     |



STable4\_20PerPair

|                                      |          |            |             |    |     |
|--------------------------------------|----------|------------|-------------|----|-----|
| GO:0043624                           | 8.10E-09 | 10.6834871 | 1.323437824 | 12 | 153 |
| cellular protein complex disassembly |          |            |             |    |     |

|                             |          |             |             |    |     |
|-----------------------------|----------|-------------|-------------|----|-----|
| GO:0043241                  | 1.17E-08 | 10.31397745 | 1.366687426 | 12 | 158 |
| protein complex disassembly |          |             |             |    |     |

|                                                    |          |             |             |    |     |
|----------------------------------------------------|----------|-------------|-------------|----|-----|
| GO:0072594                                         | 2.31E-08 | 8.589893418 | 1.764583766 | 13 | 204 |
| establishment of protein localization to organelle |          |             |             |    |     |

|                                             |          |             |             |    |     |
|---------------------------------------------|----------|-------------|-------------|----|-----|
| GO:0034623                                  | 3.44E-08 | 9.284824648 | 1.505086153 | 12 | 174 |
| cellular macromolecular complex disassembly |          |             |             |    |     |

STable4\_20PerPair

|                                            |          |             |             |    |     |      |
|--------------------------------------------|----------|-------------|-------------|----|-----|------|
| GO:0032984                                 | 4.71E-08 | 9.003656404 | 1.548335755 | 12 | 179 |      |
| macromolecular complex disassembly         |          |             |             |    |     |      |
| GO:0006413                                 | 8.04E-08 | 9.707291278 | 1.314787904 | 11 | 152 |      |
| translational initiation                   |          |             |             |    |     |      |
| GO:0000956                                 | 2.37E-07 | 8.65245392  | 1.461836551 | 11 | 169 |      |
| nuclear-transcribed mRNA catabolic process |          |             |             |    |     |      |
| GO:0006402                                 | 3.99E-07 | 8.180953882 | 1.539685835 | 11 | 178 | mRNA |
| catabolic process                          |          |             |             |    |     |      |

STable4\_20PerPair

|                         |          |             |             |    |     |     |
|-------------------------|----------|-------------|-------------|----|-----|-----|
| GO:0019080              | 7.31E-07 | 8.748072772 | 1.306137984 | 10 | 151 |     |
| viral genome expression |          |             |             |    |     |     |
| GO:0019083              | 7.31E-07 | 8.748072772 | 1.306137984 | 10 | 151 |     |
| viral transcription     |          |             |             |    |     |     |
| GO:0019058              | 7.51E-07 | 6.840586738 | 1.998131617 | 12 | 231 |     |
| viral infectious cycle  |          |             |             |    |     |     |
| GO:0006401              | 1.62E-06 | 7.028938325 | 1.773233686 | 11 | 205 | RNA |
| catabolic process       |          |             |             |    |     |     |

STable4\_20PerPair

|                            |          |            |             |    |     |
|----------------------------|----------|------------|-------------|----|-----|
| GO:0022415                 | 2.60E-06 | 6.02826149 | 2.248979309 | 12 | 260 |
| viral reproductive process |          |            |             |    |     |

|                                                  |          |             |             |    |     |
|--------------------------------------------------|----------|-------------|-------------|----|-----|
| GO:0071845                                       | 6.43E-06 | 5.486985945 | 2.456577399 | 12 | 284 |
| cellular component disassembly at cellular level |          |             |             |    |     |

|                                |          |             |             |    |     |
|--------------------------------|----------|-------------|-------------|----|-----|
| GO:0022411                     | 7.41E-06 | 5.405925356 | 2.491177081 | 12 | 288 |
| cellular component disassembly |          |             |             |    |     |

|                    |          |             |            |    |     |
|--------------------|----------|-------------|------------|----|-----|
| GO:0016032         | 8.04E-06 | 4.344245204 | 3.90111411 | 15 | 451 |
| viral reproduction |          |             |            |    |     |

STable4\_20PerPair

GO:0033365 1.42E-05 4.129019452 4.091412359 15 473  
 protein localization to organelle

Tissue: Nerve\_Tibial=>Muscle\_skeletal Type: asymmetric

SourceGene: KIAA1456(ENSG00000250305.3) putative methyltransferase

TargetGeneSet: ZBTB48 ADPRHL2 RP11 RPS7 ROCK2 RPL37A RPL35A LMLN  
 ZNF827 MYLIP DEK ZBTB12 RPS18 RPL39P3 HIP1 DBF4 RPS20 RPL30  
 EEF1D RPL8 FRMD3 RPL35 RPL13AP5 FAU RPS3 RPS25 ATP5G2  
 RPL41 TPT1 RPL36A SIX1 RPS3AP6 RPLP1 C16orf13 CASP16 RPS15A  
 RPL13 RPS7P1 RPL23A RPL27 ZFP161 RPS15 DAPK3 C19orf43 GLTSCR2 TMC2  
 C21orf33 TCN2 GS1 PQBP1

GOBPID Pvalue OddsRatio ExpCount Count Size Term

GO:0006414 4.82E-31 150.7059801 0.290637326 19 105  
 translational elongation

GO:0006415 4.13E-30 160.6998755 0.251885683 18 91  
 translational termination

GO:0006614 6.86E-29 134.7084639 0.290637326 18 105  
 SRP-dependent cotranslational protein targeting to membrane

STable4\_20PerPair

|                                                                       |          |             |             |    |     |
|-----------------------------------------------------------------------|----------|-------------|-------------|----|-----|
| GO:0006613                                                            | 8.25E-29 | 133.1683884 | 0.293405301 | 18 | 106 |
| cotranslational protein targeting to membrane                         |          |             |             |    |     |
| GO:0045047                                                            | 8.25E-29 | 133.1683884 | 0.293405301 | 18 | 106 |
| protein targeting to ER                                               |          |             |             |    |     |
| GO:0072599                                                            | 8.25E-29 | 133.1683884 | 0.293405301 | 18 | 106 |
| establishment of protein localization to endoplasmic reticulum        |          |             |             |    |     |
| GO:0070972                                                            | 6.59E-28 | 117.09      | 0.326620995 | 18 | 118 |
| localization to endoplasmic reticulum                                 |          |             |             |    |     |
| GO:0000184                                                            | 7.75E-28 | 115.9225923 | 0.32938897  | 18 | 119 |
| "nuclear-transcribed mRNA catabolic process, nonsense-mediated decay" |          |             |             |    |     |
| GO:0019080                                                            | 7.26E-26 | 87.83458647 | 0.417964155 | 18 | 151 |
| viral genome expression                                               |          |             |             |    |     |
| GO:0019083                                                            | 7.26E-26 | 87.83458647 | 0.417964155 | 18 | 151 |
| viral transcription                                                   |          |             |             |    |     |
| GO:0006413                                                            | 8.22E-26 | 87.17299864 | 0.420732129 | 18 | 152 |
| translational initiation                                              |          |             |             |    |     |
| GO:0006612                                                            | 9.30E-26 | 86.52121212 | 0.423500104 | 18 | 153 |
| protein targeting to membrane                                         |          |             |             |    |     |

STable4\_20PerPair

|                                                    |          |             |             |    |     |      |
|----------------------------------------------------|----------|-------------|-------------|----|-----|------|
| GO:0043624                                         | 9.30E-26 | 86.52121212 | 0.423500104 | 18 | 153 |      |
| cellular protein complex disassembly               |          |             |             |    |     |      |
| GO:0043241                                         | 1.70E-25 | 83.40194805 | 0.437339976 | 18 | 158 |      |
| protein complex disassembly                        |          |             |             |    |     |      |
| GO:0000956                                         | 6.03E-25 | 77.2667068  | 0.467787696 | 18 | 169 |      |
| nuclear-transcribed mRNA catabolic process         |          |             |             |    |     |      |
| GO:0034623                                         | 1.04E-24 | 74.76398601 | 0.481627569 | 18 | 174 |      |
| cellular macromolecular complex disassembly        |          |             |             |    |     |      |
| GO:0006402                                         | 1.59E-24 | 72.87443182 | 0.492699467 | 18 | 178 | mRNA |
| catabolic process                                  |          |             |             |    |     |      |
| GO:0032984                                         | 1.77E-24 | 72.41671372 | 0.495467442 | 18 | 179 |      |
| macromolecular complex disassembly                 |          |             |             |    |     |      |
| GO:0019058                                         | 3.43E-24 | 60.59770889 | 0.639402118 | 19 | 231 |      |
| viral infectious cycle                             |          |             |             |    |     |      |
| GO:0072594                                         | 2.00E-23 | 62.57331378 | 0.564666805 | 18 | 204 |      |
| establishment of protein localization to organelle |          |             |             |    |     |      |
| GO:0006401                                         | 2.19E-23 | 62.23432183 | 0.56743478  | 18 | 205 | RNA  |
| catabolic process                                  |          |             |             |    |     |      |

STable4\_20PerPair

|                                                  |          |             |             |    |     |
|--------------------------------------------------|----------|-------------|-------------|----|-----|
| GO:0022415                                       | 3.40E-23 | 53.19699664 | 0.719673379 | 19 | 260 |
| viral reproductive process                       |          |             |             |    |     |
| GO:0071845                                       | 8.58E-21 | 43.50820232 | 0.786104768 | 18 | 284 |
| cellular component disassembly at cellular level |          |             |             |    |     |
| GO:0022411                                       | 1.11E-20 | 42.85151515 | 0.797176666 | 18 | 288 |
| cellular component disassembly                   |          |             |             |    |     |
| GO:0016032                                       | 1.22E-18 | 29.27700617 | 1.248356515 | 19 | 451 |
| viral reproduction                               |          |             |             |    |     |
| GO:0033365                                       | 2.96E-18 | 27.81445353 | 1.309251955 | 19 | 473 |
| protein localization to organelle                |          |             |             |    |     |
| GO:0006605                                       | 8.18E-17 | 25.0388756  | 1.312019929 | 18 | 474 |
| protein targeting                                |          |             |             |    |     |
| GO:0042274                                       | 1.56E-05 | 77.81621622 | 0.049823542 | 3  | 18  |
| ribosomal small subunit biogenesis               |          |             |             |    |     |

Tissue: Nerve\_Tibial=>Muscle\_Skeletal Type: asymmetric

SourceGene: LPP(ENSG00000145012.8)



STable4\_20PerPair

TargetGeneSet: RPL22 RPL11 BRD8 LRIF1 RPS27 RPS7 NEB RPL37A  
 GAL3ST2 SCAP RP11 RPL24 ZBTB38 RPL35A LMLN HNRPDL RPL34 LARP1B LSM6  
 RPS3A TNFAIP8 NUDCD2 CSNK2B RPS18 RPL10A ENPP5 RPL39P3 LTV1 OGDH  
 ZMIZ2 C7orf63 TECPR1 C8orf40 RPS20 RPL30 RPL35 ADRA2A ZNF32-AS2  
 VPS26A RPS24 FAU CWC15 RPS25 ATP5G2 RPL41 UFM1 TPT1 COMMD6  
 TIMM9 KLF13 RPS3AP6 RPLP1 TCEB2 NUBP1 RPS15A MIR4519 VM01 RPL23A  
 RPL27 SEH1L UBA52 SNRPD2 SNRPB2 LINC00493 RANBP1 TNRC6B UXT  
 RPL10

| GOBPID                                                      | Pvalue   | OddsRatio | ExpCount    | Count       | Size | Term |
|-------------------------------------------------------------|----------|-----------|-------------|-------------|------|------|
| GO:0006415                                                  | 6.05E-39 |           | 150.9323968 | 0.36523424  | 24   | 91   |
| translational termination                                   |          |           |             |             |      |      |
| GO:0006414                                                  | 2.95E-37 |           | 124.7233115 | 0.421424123 | 24   | 105  |
| translational elongation                                    |          |           |             |             |      |      |
| GO:0006614                                                  | 2.95E-37 |           | 124.7233115 | 0.421424123 | 24   | 105  |
| SRP-dependent cotranslational protein targeting to membrane |          |           |             |             |      |      |
| GO:0006613                                                  | 3.81E-37 |           | 123.1936872 | 0.425437686 | 24   | 106  |
| cotranslational protein targeting to membrane               |          |           |             |             |      |      |
| GO:0045047                                                  | 3.81E-37 |           | 123.1936872 | 0.425437686 | 24   | 106  |
| protein targeting to ER                                     |          |           |             |             |      |      |

STable4\_20PerPair

|                                                                       |          |             |             |    |     |
|-----------------------------------------------------------------------|----------|-------------|-------------|----|-----|
| GO:0072599                                                            | 3.81E-37 | 123.1936872 | 0.425437686 | 24 | 106 |
| establishment of protein localization to endoplasmic reticulum        |          |             |             |    |     |
| GO:0070972                                                            | 6.62E-36 | 107.3767209 | 0.473600443 | 24 | 118 |
| protein localization to endoplasmic reticulum                         |          |             |             |    |     |
| GO:0000184                                                            | 8.27E-36 | 106.2390093 | 0.477614006 | 24 | 119 |
| "nuclear-transcribed mRNA catabolic process, nonsense-mediated decay" |          |             |             |    |     |
| GO:0019080                                                            | 4.93E-35 | 85.78042328 | 0.606048024 | 25 | 151 |
| viral genome expression                                               |          |             |             |    |     |
| GO:0019083                                                            | 4.93E-35 | 85.78042328 | 0.606048024 | 25 | 151 |
| viral transcription                                                   |          |             |             |    |     |
| GO:0006612                                                            | 7.03E-35 | 84.42826705 | 0.614075151 | 25 | 153 |
| protein targeting to membrane                                         |          |             |             |    |     |
| GO:0000956                                                            | 1.00E-33 | 74.9631734  | 0.67829216  | 25 | 169 |
| nuclear-transcribed mRNA catabolic process                            |          |             |             |    |     |

| GO ID                                                            | Significance | Count       | Ratio       | Count | Count | Category |
|------------------------------------------------------------------|--------------|-------------|-------------|-------|-------|----------|
| GO:0006402<br>catabolic process                                  | 3.97E-33     | 70.50901169 | 0.714414227 | 25    | 178   | mRNA     |
| GO:0006413<br>translational initiation                           | 4.83E-33     | 78.66727941 | 0.610061587 | 24    | 152   |          |
| GO:0043624<br>cellular protein complex disassembly               | 5.72E-33     | 78.05198358 | 0.614075151 | 24    | 153   |          |
| GO:0043241<br>protein complex disassembly                        | 1.30E-32     | 75.11325724 | 0.634142966 | 24    | 158   |          |
| GO:0072594<br>establishment of protein localization to organelle | 1.43E-31     | 60.15744033 | 0.818766867 | 25    | 204   |          |
| GO:0034623<br>cellular macromolecular complex disassembly        | 1.52E-31     | 67.02588235 | 0.698359975 | 24    | 174   |          |
| GO:0006401<br>catabolic process                                  | 1.63E-31     | 59.81902357 | 0.82278043  | 25    | 205   | RNA      |
| GO:0032984<br>macromolecular complex disassembly                 | 3.11E-31     | 64.84098672 | 0.71842779  | 24    | 179   |          |

STable4\_20PerPair

|                                                  |          |             |             |    |     |
|--------------------------------------------------|----------|-------------|-------------|----|-----|
| GO:0019058                                       | 3.63E-30 | 52.17343336 | 0.92713307  | 25 | 231 |
| viral infectious cycle                           |          |             |             |    |     |
| GO:0022415                                       | 7.65E-29 | 45.6415216  | 1.0435264   | 25 | 260 |
| viral reproductive process                       |          |             |             |    |     |
| GO:0071845                                       | 2.93E-26 | 38.37013575 | 1.139851913 | 24 | 284 |
| cellular component disassembly at cellular level |          |             |             |    |     |
| GO:0022411                                       | 4.12E-26 | 37.77807487 | 1.155906166 | 24 | 288 |
| cellular component disassembly                   |          |             |             |    |     |
| GO:0016032                                       | 1.10E-25 | 28.69468959 | 1.810116947 | 27 | 451 |
| viral reproduction                               |          |             |             |    |     |
| GO:0033365                                       | 2.57E-22 | 23.58123647 | 1.898415335 | 25 | 473 |
| protein localization to organelle                |          |             |             |    |     |
| GO:0006605                                       | 2.71E-22 | 23.52702976 | 1.902428898 | 25 | 474 |
| protein targeting                                |          |             |             |    |     |

Stable4\_20PerPair  
 GO:0022613 2.52E-07 12.05527211 0.903051692 9 225  
 ribonucleoprotein complex biogenesis

GO:0071843 4.19E-07 11.31029281 0.959241575 9 239  
 cellular component biogenesis at cellular level

GO:0042254 2.08E-06 13.77478597 0.598020898 7 149  
 ribosome biogenesis

Tissue: Nerve\_Tibial=>Muscle\_Skeletal Type: asymmetric  
 SourceGene: MORN2(ENSG00000188010.8)  
 TargetGeneSet: RP1 CLSTN1 MTOR ATP13A2 MAGOH RP4 LRIF1 PMF1  
 DUSP12 TIMM17A SNRPE SRP9 OBSCN C1D TPRKB DGUOK TMEM131 COA5  
 UNC50 MMADHC NEB C2orf47 SLC23A3 HDLBP LSM3 SS18L2 VPRBP RAD54L2 RP11  
 CHMP2B RG9MTD1 CCDC58 PEX5L MYL5 SLBP 7SK LARP1B LSM6 SUB1 TAF9  
 CTD MRPL22 UBLCP1 SYCP2L BAG6 CSNK2B HNRNPC MDGA1 C6orf226 CUL7  
 HMG3 SNHG5 C6orf162 LSM5 DDX56 GS1 ACN9 TRRAP BUD31 CUX1  
 SPDYE2 NAA38 SSBP1 PCM1 LSM1 UBE2V2 RPS20 ARMC1 TCEB1 C8orf59  
 OTUD6B POLR2K PLEC DENND1A PRRC2B C10orf31 HSPA14 SAR1A CHCHD1  
 KAT6B PCGF6 BCCIP IMMP1L API5 CWC15 DCUN1D5 PPHLN1 WIBG UBE3B POMP  
 ITM2B C14orf166 PSMA3 ERH SLIRP SNW1 C15orf23 MAP2K5  
 ZNF592 SNRPA1 MRPL28 TSC2 SRRM2 NOMO1 CAMTA2 MYH10 FLII GPR179  
 PSMG2 FHOD3 IER3IP1 C18orf32 SDHAF1 SNRPB SNRPB2 LINC00493  
 CEP250 DPM1 ATP5E WRB SF3A1 GGA1 SLC16A8 TNRC6B PSMD10 VBP1  
 GOBPID Pvalue OddsRatio ExpCount Count Size Term  
 GO:0000375 2.71123063330777e-11 12.1580756013746 1.51858002906373  
 15 209 RNA splicing, via transesterification reactions  
 GO:0008380 1.57731304071045e-10 8.86363636363636 2.34689640855304  
 17 323 RNA splicing  
 GO:0000377 2.37050046335867e-10 11.4623481781377 1.48225036329666  
 14 204 RNA splicing, via transesterification reactions with bulged  
 adenosine as nucleophile  
 GO:0000398 2.37050046335867e-10 11.4623481781377 1.48225036329666  
 14 204 nuclear mRNA splicing, via spliceosome  
 GO:0006397 5.27576295806882e-10 7.58349171870758 2.89910732821258  
 18 399 mRNA processing  
 GO:0043248 1.27733847387696e-05 105.455882352941 0.0508615320739049  
 3 7 proteasome assembly  
 Tissue: Nerve\_Tibial=>Muscle\_Skeletal Type: asymmetric

STable4\_20PerPair

SourceGene: NCOA6(ENSG00000198646.7) nuclear receptor coactivator 6

TargetGeneSet: TMEM51 PPIH ZYG11B COL24A1 RP11 GJA5 NMNAT2 SRGAP3  
 ASAP2 PTPN4 RPL15 SERP1 BTF3 CTD PRELID2 HNRNPC RPL10A UFL1 RPA3  
 CLIP2 IMMP2L EXTL3 DCTN6 IKBKB RPL35 FUT11 MARVELD1 CALHM2 GRK5  
 RPLP2 ELP4 EIF3M COMMD9 C11orf10 PCNXL3 ARHGEF17 NRIP2  
 KLHDC5 STAT6 DNAJC3-AS1 PLEKHG3 RPLP1 LINGO1 IL16 ZNF768 CDH11 CHD3  
 STX8 RPS15 USF2 SPINT2 RPS19 SNRPD2 RPS9 RPS5 CSRP2BP ZNFX1-AS1  
 SUSD2 ARSD ARSD-AS1 RP3 HPRT1

| GOBPID                                                      | Pvalue   | OddsRatio | ExpCount    | Count       | Size | Term |
|-------------------------------------------------------------|----------|-----------|-------------|-------------|------|------|
| GO:0006415                                                  | 9.46E-12 |           | 42.48747528 | 0.289668535 | 9    | 91   |
| translational termination                                   |          |           |             |             |      |      |
| GO:0019080                                                  | 3.39E-11 |           | 28.10086682 | 0.480658778 | 10   | 151  |
| viral genome expression                                     |          |           |             |             |      |      |
| GO:0019083                                                  | 3.39E-11 |           | 28.10086682 | 0.480658778 | 10   | 151  |
| viral transcription                                         |          |           |             |             |      |      |
| GO:0006414                                                  | 3.51E-11 |           | 36.25591216 | 0.334232925 | 9    | 105  |
| translational elongation                                    |          |           |             |             |      |      |
| GO:0006614                                                  | 3.51E-11 |           | 36.25591216 | 0.334232925 | 9    | 105  |
| SRP-dependent cotranslational protein targeting to membrane |          |           |             |             |      |      |

|                                                                       |          | Stable4_20PerPair |             |    |     |
|-----------------------------------------------------------------------|----------|-------------------|-------------|----|-----|
| GO:0006413                                                            | 3.63E-11 | 27.90101721       | 0.483841949 | 10 | 152 |
| translational initiation                                              |          |                   |             |    |     |
| GO:0006613                                                            | 3.83E-11 | 35.87963221       | 0.337416096 | 9  | 106 |
| cotranslational protein targeting to membrane                         |          |                   |             |    |     |
| GO:0045047                                                            | 3.83E-11 | 35.87963221       | 0.337416096 | 9  | 106 |
| protein targeting to ER                                               |          |                   |             |    |     |
| GO:0072599                                                            | 3.83E-11 | 35.87963221       | 0.337416096 | 9  | 106 |
| establishment of protein localization to endoplasmic reticulum        |          |                   |             |    |     |
| GO:0070972                                                            | 1.01E-10 | 31.90280188       | 0.375614144 | 9  | 118 |
| protein localization to endoplasmic reticulum                         |          |                   |             |    |     |
| GO:0000184                                                            | 1.09E-10 | 31.61056511       | 0.378797315 | 9  | 119 |
| "nuclear-transcribed mRNA catabolic process, nonsense-mediated decay" |          |                   |             |    |     |
| GO:0072594                                                            | 6.60E-10 | 20.34793814       | 0.649366826 | 10 | 204 |
| establishment of protein localization to organelle                    |          |                   |             |    |     |
| GO:0006612                                                            | 1.04E-09 | 24.08952703       | 0.487025119 | 9  | 153 |
| protein targeting to membrane                                         |          |                   |             |    |     |

STable4\_20PerPair

|                                             |          |             |             |    |     |      |
|---------------------------------------------|----------|-------------|-------------|----|-----|------|
| GO:0043624                                  | 1.04E-09 | 24.08952703 | 0.487025119 | 9  | 153 |      |
| cellular protein complex disassembly        |          |             |             |    |     |      |
| GO:0043241                                  | 1.38E-09 | 23.27299111 | 0.502940973 | 9  | 158 |      |
| protein complex disassembly                 |          |             |             |    |     |      |
| GO:0019058                                  | 2.21E-09 | 17.8280543  | 0.735312435 | 10 | 231 |      |
| viral infectious cycle                      |          |             |             |    |     |      |
| GO:0000956                                  | 2.51E-09 | 21.65625    | 0.537955851 | 9  | 169 |      |
| nuclear-transcribed mRNA catabolic process  |          |             |             |    |     |      |
| GO:0034623                                  | 3.25E-09 | 20.99262899 | 0.553871704 | 9  | 174 |      |
| cellular macromolecular complex disassembly |          |             |             |    |     |      |
| GO:0006402                                  | 3.97E-09 | 20.4900048  | 0.566604387 | 9  | 178 | mRNA |
| catabolic process                           |          |             |             |    |     |      |
| GO:0032984                                  | 4.17E-09 | 20.36804452 | 0.569787558 | 9  | 179 |      |
| macromolecular complex disassembly          |          |             |             |    |     |      |
| GO:0022415                                  | 6.90E-09 | 15.72777778 | 0.827624386 | 10 | 260 |      |
| viral reproductive process                  |          |             |             |    |     |      |



STable4\_20PerPair

|                                                                |          |             |             |    |     |     |
|----------------------------------------------------------------|----------|-------------|-------------|----|-----|-----|
| GO:0006401<br>catabolic process                                | 1.37E-08 | 17.6338941  | 0.652549997 | 9  | 205 | RNA |
| GO:0071845<br>cellular component disassembly at cellular level | 2.24E-07 | 12.4982801  | 0.904020483 | 9  | 284 |     |
| GO:0022411<br>cellular component disassembly                   | 2.53E-07 | 12.31560593 | 0.916753166 | 9  | 288 |     |
| GO:0016032<br>viral reproduction                               | 1.18E-06 | 8.795666415 | 1.435609992 | 10 | 451 |     |
| GO:0033365<br>protein localization to organelle                | 1.81E-06 | 8.364530838 | 1.505639748 | 10 | 473 |     |
| GO:0006605<br>protein targeting                                | 1.85E-06 | 8.345905172 | 1.508822919 | 10 | 474 |     |

Tissue: Nerve\_Tibial=>Muscle\_Skeletal Type: asymmetric

STable4\_20PerPair

demethylase)

|                |          |            |         |           |          |         |         |           |        |      |
|----------------|----------|------------|---------|-----------|----------|---------|---------|-----------|--------|------|
| TargetGeneSet: | WDC1     | RP11       | DLGAP3  | C1orf168  | ILF2     | IL6R    | DUSP12  |           |        |      |
| TBX19          | TIMM17A  | RPLP0P6    | TMEM131 | WIPF1     | RFTN2    | CLK1    | RPL37A  | LSM3      | EBP    |      |
| P4HTM          | NISCH    | ABTB1      | IFT122  | NPHP3-AS1 |          | MRPL47  | PEX5L   | PARL      | EVC2   |      |
| MRFAP1L1       |          | WDR1       | UBE2K   | NUP54     | GAB1     | NSUN2   | RPS23   | HIST1H2AG |        |      |
| SYNGAP1        | RPL39P3  | SERAC1     | CLDN15  | CAPZA2    | OPN1SW   | ARMC1   | FAM92A1 | INTS8     | ENY2   |      |
| PUF60          | C8orf33  | MIRLET7DHG |         | RPL35     | C9orf173 |         | HSPA14  | FGFBP3    | TM9SF3 |      |
| BCCIP          | RPLP2    | CHRNA10    | FADS3   | FAU       | MRPL21   | SNORA25 | WBP11   | CPM       | METAP2 |      |
| SNRPF          | RPL18AP3 |            | RFC3    | RPS29     | METTL21D |         | ERH     | POMT2     | SLIRP  | SNW1 |
| MAGEL2         | RPS3AP6  | MAP2K5     | RPLP1   | UNC45A    | C16orf91 |         | PKD1    | ALG1      | RPS15A |      |
| PYDC1          | HSD11B2  | MBTPS1     | MIR22HG | ANKFY1    | SREBF1   | RPS7P1  | RPL27   | HOXB4     | ABCA6  |      |
| H3F3B          | RHBDF2   | WDR45L     | RPS15   | ANKRD27   | ZFP14    | TMEM91  | RPS19   | ZNF17     | SNRPB  |      |
| SNRPB2         | SRC      | ZNF334     | HSPA13  | LGALS1    | RP1      | SYTL4   | RPL36A  |           |        |      |

|        |        |           |          |       |      |      |
|--------|--------|-----------|----------|-------|------|------|
| GOBPID | Pvalue | OddsRatio | ExpCount | Count | Size | Term |
|--------|--------|-----------|----------|-------|------|------|

|                          |          |  |             |             |    |     |
|--------------------------|----------|--|-------------|-------------|----|-----|
| GO:0006414               | 1.28E-12 |  | 24.55225806 | 0.632136184 | 12 | 105 |
| translational elongation |          |  |             |             |    |     |

|                           |          |  |             |            |    |    |
|---------------------------|----------|--|-------------|------------|----|----|
| GO:0006415                | 6.28E-12 |  | 25.84276316 | 0.54785136 | 11 | 91 |
| translational termination |          |  |             |            |    |    |

|                                                             |          |  |             |             |    |     |
|-------------------------------------------------------------|----------|--|-------------|-------------|----|-----|
| GO:0006614                                                  | 3.09E-11 |  | 21.97228443 | 0.632136184 | 11 | 105 |
| SRP-dependent cotranslational protein targeting to membrane |          |  |             |             |    |     |

STable4\_20PerPair

GO:0006613 3.43E-11 21.73947368 0.638156529 11 106  
 cotranslational protein targeting to membrane

GO:0045047 3.43E-11 21.73947368 0.638156529 11 106  
 protein targeting to ER

GO:0072599 3.43E-11 21.73947368 0.638156529 11 106  
 establishment of protein localization to endoplasmic reticulum

GO:0070972 1.11E-10 19.2851697 0.710400664 11 118  
 protein localization to endoplasmic reticulum

GO:0043624 1.15E-10 16.13957447 0.921112726 12 153  
 cellular protein complex disassembly

STable4\_20PerPair

|                                                                       |          |             |             |    |     |
|-----------------------------------------------------------------------|----------|-------------|-------------|----|-----|
| GO:0000184                                                            | 1.22E-10 | 19.10526316 | 0.716421009 | 11 | 119 |
| "nuclear-transcribed mRNA catabolic process, nonsense-mediated decay" |          |             |             |    |     |
| GO:0043241                                                            | 1.68E-10 | 15.58136986 | 0.951214449 | 12 | 158 |
| protein complex disassembly                                           |          |             |             |    |     |
| GO:0072594                                                            | 2.47E-10 | 13.03587095 | 1.228150301 | 13 | 204 |
| establishment of protein localization to organelle                    |          |             |             |    |     |
| GO:0000956                                                            | 3.67E-10 | 14.47847134 | 1.01743824  | 12 | 169 |
| nuclear-transcribed mRNA catabolic process                            |          |             |             |    |     |
| GO:0034623                                                            | 5.14E-10 | 14.02666667 | 1.047539963 | 12 | 174 |
| cellular macromolecular complex disassembly                           |          |             |             |    |     |

STable4\_20PerPair

|                                                  |          |             |             |    |     |      |
|--------------------------------------------------|----------|-------------|-------------|----|-----|------|
| GO:0006402<br>catabolic process                  | 6.68E-10 | 13.68481928 | 1.071621341 | 12 | 178 | mRNA |
| GO:0032984<br>macromolecular complex disassembly | 7.13E-10 | 13.60191617 | 1.077641686 | 12 | 179 |      |
| GO:0019080<br>viral genome expression            | 1.59E-09 | 14.70526316 | 0.909072037 | 11 | 151 |      |
| GO:0019083<br>viral transcription                | 1.59E-09 | 14.70526316 | 0.909072037 | 11 | 151 |      |
| GO:0006413<br>translational initiation           | 1.71E-09 | 14.59994401 | 0.915092381 | 11 | 152 |      |

STable4\_20PerPair

|                                                  |          |             |             |    |     |     |
|--------------------------------------------------|----------|-------------|-------------|----|-----|-----|
| GO:0006612                                       | 1.83E-09 | 14.49610823 | 0.921112726 | 11 | 153 |     |
| protein targeting to membrane                    |          |             |             |    |     |     |
| GO:0006605                                       | 2.63E-09 | 7.390403251 | 2.853643346 | 17 | 474 |     |
| protein targeting                                |          |             |             |    |     |     |
| GO:0006401                                       | 3.36E-09 | 11.74797927 | 1.234170646 | 12 | 205 | RNA |
| catabolic process                                |          |             |             |    |     |     |
| GO:0071845                                       | 1.26E-07 | 8.289411765 | 1.70977787  | 12 | 284 |     |
| cellular component disassembly at cellular level |          |             |             |    |     |     |
| GO:0033365                                       | 1.28E-07 | 6.325509461 | 2.847623002 | 15 | 473 |     |
| protein localization to organelle                |          |             |             |    |     |     |
| GO:0019058                                       | 1.32E-07 | 9.305263158 | 1.390699606 | 11 | 231 |     |
| viral infectious cycle                           |          |             |             |    |     |     |

STable4\_20PerPair

GO:0022411 1.46E-07 8.166956522 1.733859248 12 288  
 cellular component disassembly

GO:0022415 4.33E-07 8.204660748 1.565289599 11 260  
 viral reproductive process

GO:0016032 1.57E-05 5.075170843 2.71517542 12 451  
 viral reproduction

Tissue: Muscle\_Skeletal=>Nerve\_Tibial Type: asymmetric

SourceGene: PLXNA1(ENSG00000114554.7) plexin A1

TargetGeneSet: GNB1 RPL22 SLC6A9 RPS8 RP11 RPS27 SYT12 ATP1B1  
 TP53BP2 TGIF2P1 ASAP2 HPCAL1 TMEM178 UBC CLASP1 BSN-AS2 RPL29 RPS3A  
 ADAMTS16 CTB RPL10A GLI3 ARPC1B FAM200A XKR4 EIF3E RPS6

STable4\_20PerPair

|         |         |         |       |        |            |       |        |              |
|---------|---------|---------|-------|--------|------------|-------|--------|--------------|
| S1PR3   | RPL12   | RPS3AP5 | NAV2  | AMBRA1 | GANAB      | RDX   | COMMD6 | DICER1-AS1   |
| DTWD1   | RPS3AP6 | NPTN    | RPL13 | RPL26  | KANSL1-AS1 |       | CTD    | RPL18 ZNF419 |
| SNORD86 | FOXRED2 | MICALL1 | RP2   | SMC1A  | NLGN3      | RPL39 | RPS4Y1 |              |

| GOBPID     | Pvalue   | OddsRatio | ExpCount    | Count       | Size | Term                                                                         |
|------------|----------|-----------|-------------|-------------|------|------------------------------------------------------------------------------|
| GO:0043624 | 1.19E-22 |           | 79.39937435 | 0.391737596 | 16   | 153<br>cellular protein complex disassembly                                  |
| GO:0000184 | 1.76E-22 |           | 93.81555944 | 0.304684797 | 15   | 119<br>"nuclear-transcribed mRNA catabolic process, nonsense-mediated decay" |
| GO:0043241 | 2.03E-22 |           | 76.5767941  | 0.404539478 | 16   | 158<br>protein complex disassembly                                           |
| GO:0006415 | 2.95E-22 |           | 113.3359684 | 0.232994256 | 14   | 91<br>translational termination                                              |
| GO:0034623 | 1.00E-21 |           | 68.74502712 | 0.445505501 | 16   | 174<br>cellular macromolecular complex disassembly                           |
| GO:0032984 | 1.60E-21 |           | 66.61291265 | 0.458307384 | 16   | 179<br>macromolecular complex disassembly                                    |
| GO:0006414 | 2.48E-21 |           | 95.80602007 | 0.268839527 | 14   | 105<br>translational elongation                                              |
| GO:0006614 | 2.48E-21 |           | 95.80602007 | 0.268839527 | 14   | 105<br>SRP-dependent cotranslational protein targeting to membrane           |



STable4\_20PerPair

|                                                                |          |             |             |    |     |      |
|----------------------------------------------------------------|----------|-------------|-------------|----|-----|------|
| GO:0006613                                                     | 2.85E-21 | 94.75803403 | 0.271399903 | 14 | 106 |      |
| cotranslational protein targeting to membrane                  |          |             |             |    |     |      |
| GO:0045047                                                     | 2.85E-21 | 94.75803403 | 0.271399903 | 14 | 106 |      |
| protein targeting to ER                                        |          |             |             |    |     |      |
| GO:0072599                                                     | 2.85E-21 | 94.75803403 | 0.271399903 | 14 | 106 |      |
| establishment of protein localization to endoplasmic reticulum |          |             |             |    |     |      |
| GO:0006413                                                     | 8.10E-21 | 71.05341739 | 0.38917722  | 15 | 152 |      |
| translational initiation                                       |          |             |             |    |     |      |
| GO:0070972                                                     | 1.38E-20 | 83.7541806  | 0.30212442  | 14 | 118 |      |
| protein localization to endoplasmic reticulum                  |          |             |             |    |     |      |
| GO:0000956                                                     | 4.17E-20 | 63.13459268 | 0.432703619 | 15 | 169 |      |
| nuclear-transcribed mRNA catabolic process                     |          |             |             |    |     |      |
| GO:0006402                                                     | 9.28E-20 | 59.61098717 | 0.455747007 | 15 | 178 | mRNA |
| catabolic process                                              |          |             |             |    |     |      |
| GO:0019080                                                     | 4.98E-19 | 63.43319581 | 0.386616843 | 14 | 151 |      |
| viral genome expression                                        |          |             |             |    |     |      |
| GO:0019083                                                     | 4.98E-19 | 63.43319581 | 0.386616843 | 14 | 151 |      |
| viral transcription                                            |          |             |             |    |     |      |

STable4\_20PerPair

|                                                    |          |             |             |    |     |     |
|----------------------------------------------------|----------|-------------|-------------|----|-----|-----|
| GO:0006612                                         | 6.01E-19 | 62.51172975 | 0.391737596 | 14 | 153 |     |
| protein targeting to membrane                      |          |             |             |    |     |     |
| GO:0006401                                         | 8.05E-19 | 51.0430622  | 0.524877171 | 15 | 205 | RNA |
| catabolic process                                  |          |             |             |    |     |     |
| GO:0071845                                         | 2.89E-18 | 40.21606254 | 0.72714691  | 16 | 284 |     |
| cellular component disassembly at cellular level   |          |             |             |    |     |     |
| GO:0022411                                         | 3.61E-18 | 39.61344538 | 0.737388416 | 16 | 288 |     |
| cellular component disassembly                     |          |             |             |    |     |     |
| GO:0072594                                         | 3.66E-17 | 45.56887872 | 0.522316795 | 14 | 204 |     |
| establishment of protein localization to organelle |          |             |             |    |     |     |
| GO:0019058                                         | 2.11E-16 | 39.82328191 | 0.591446959 | 14 | 231 |     |
| viral infectious cycle                             |          |             |             |    |     |     |
| GO:0022415                                         | 1.11E-15 | 35.05691057 | 0.665697876 | 14 | 260 |     |
| viral reproductive process                         |          |             |             |    |     |     |
| GO:0033365                                         | 2.06E-13 | 20.77610163 | 1.211058058 | 15 | 473 |     |
| protein localization to organelle                  |          |             |             |    |     |     |
| GO:0006605                                         | 2.12E-13 | 20.72935235 | 1.213618435 | 15 | 474 |     |
| protein targeting                                  |          |             |             |    |     |     |

STable4\_20PerPair

GO:0016032 2.16E-12 19.4685106 1.154729776 14 451  
viral reproduction

Tissue: Muscle\_Skeletal=>Nerve\_Tibial Type: asymmetric

SourceGene: RP11-241I20.3(ENSG00000234335.1)

| TargetGeneSet: | RPL22                | PQLC2                                                               | RPL11            | RP4               | PDC      | RP11              | GALNT2  | PREB     | PIGF    |      |
|----------------|----------------------|---------------------------------------------------------------------|------------------|-------------------|----------|-------------------|---------|----------|---------|------|
| UBC            | RPL31                | FOXD4L1                                                             | BIN1             | RPL32             | RPP14    | RPL35A            | MSANTD1 | HERC5    | RPL34   | CTD  |
| RPL37          | MIP                  | HOMER1                                                              | ZFYVE16          | RPS23             | TCF7     | GABRP             | RPL10A  | RPL39P3  | HDAC2   |      |
| MRPS12         | PERP                 | SNX9                                                                | STEAP1B          | HNRNPA2B1         | SLC12A9  | SHH               | RPS20   | GRIP1    |         |      |
| RPL30          | PUF60                | RPS6                                                                | RPL12            | SLC27A4           | COBRA1   | FBXO18            | RPS24   | RPL13AP5 |         |      |
| RPS13          | MTA2                 | LRRN4CL                                                             | RNU2-2           | FAU               | CCL13    | CDK2AP2           | RPS3    | RPS25    | HYOU1   |      |
| HEBP1          | GXYLT1               | PFDN5                                                               | RPL41            | NACA              | RPL14P1  | DAO               | RPS29   | KIAA0317 |         | SLTM |
| RPS3AP6        | RPS15A               | TMC7                                                                | FBXL19           | RPL26             | ARHGAP44 |                   | RPL23A  | RPL17    | PNMT    |      |
| ERBB2          | RPL27                | PHB                                                                 | ARHGDI1          | LMNB2             | UBA52    | RPS16             | ZNF780A | ZNF235   | SNRPD2  |      |
| RPL18          | ZNF534               | RPL28                                                               | ZNFX1-AS1        |                   | TAF4     | RPS21             | ZNF74   | BCR      | GAL3ST1 |      |
| EIF3L          | RANGAP1              | PPP1R3F                                                             | RP13             | RAB40A            | GPC4     | MTM1              | HAUS7   | PLXNB3   | MT      |      |
| GOBPID         | Pvalue               | OddsRatio                                                           | ExpCount         | Count             | Size     | Term              |         |          |         |      |
| GO:0006415     | 1.2517819831294e-47  |                                                                     | 127.402873563218 |                   |          | 0.560445643900076 |         |          |         |      |
| 31             | 91                   | translational termination                                           |                  |                   |          |                   |         |          |         |      |
| GO:0006414     | 2.38409111527322e-45 |                                                                     | 103.198508853681 |                   |          | 0.646668050653934 |         |          |         |      |
| 31             | 105                  | translational elongation                                            |                  |                   |          |                   |         |          |         |      |
| GO:0006614     | 2.38409111527322e-45 |                                                                     | 103.198508853681 |                   |          | 0.646668050653934 |         |          |         |      |
| 31             | 105                  | SRP-dependent cotranslational protein targeting to membrane         |                  |                   |          |                   |         |          |         |      |
| GO:0006613     | 3.35632427922435e-45 |                                                                     | 101.815402298851 |                   |          | 0.652826793993495 |         |          |         |      |
| 31             | 106                  | cotranslational protein targeting to membrane                       |                  |                   |          |                   |         |          |         |      |
| GO:0045047     | 3.35632427922435e-45 |                                                                     | 101.815402298851 |                   |          | 0.652826793993495 |         |          |         |      |
| 31             | 106                  | protein targeting to ER                                             |                  |                   |          |                   |         |          |         |      |
| GO:0072599     | 3.35632427922435e-45 |                                                                     | 101.815402298851 |                   |          | 0.652826793993495 |         |          |         |      |
| 31             | 106                  | establishment of protein localization to endoplasmic reticulum      |                  |                   |          |                   |         |          |         |      |
| GO:0070972     | 1.54020609043224e-43 |                                                                     | 87.6981767736821 |                   |          | 0.726731714068231 |         |          |         |      |
| 31             | 118                  | protein localization to endoplasmic reticulum                       |                  |                   |          |                   |         |          |         |      |
| GO:0000184     | 2.0746181668463e-43  |                                                                     | 86.6955329153605 |                   |          | 0.732890457407792 |         |          |         |      |
| 31             | 119                  | nuclear-transcribed mRNA catabolic process, nonsense-mediated decay |                  |                   |          |                   |         |          |         |      |
| GO:0019080     | 1.19778126380658e-41 |                                                                     | 67.1938670204924 |                   |          | 0.929970244273753 |         |          |         |      |
| 32             | 151                  | viral genome expression                                             |                  |                   |          |                   |         |          |         |      |
| GO:0019083     | 1.19778126380658e-41 |                                                                     | 67.1938670204924 |                   |          | 0.929970244273753 |         |          |         |      |
| 32             | 151                  | viral transcription                                                 |                  |                   |          |                   |         |          |         |      |
| GO:0006413     | 1.51132929845921e-41 |                                                                     | 66.6292397660819 |                   |          | 0.936128987613314 |         |          |         |      |
| 32             | 152                  | translational initiation                                            |                  |                   |          |                   |         |          |         |      |
| GO:0006612     | 1.22704965767786e-39 |                                                                     | 62.3855285472018 |                   |          | 0.942287730952875 |         |          |         |      |
| 31             | 153                  | protein targeting to membrane                                       |                  |                   |          |                   |         |          |         |      |
| GO:0043624     | 1.22704965767786e-39 |                                                                     | 62.3855285472018 |                   |          | 0.942287730952875 |         |          |         |      |
| 31             | 153                  | cellular protein complex disassembly                                |                  |                   |          |                   |         |          |         |      |
| GO:0043241     | 3.64283852177859e-39 |                                                                     | 59.90836274776   | 0.973081447650682 |          |                   |         |          |         | 31   |
| 158            | protein              | complex disassembly                                                 |                  |                   |          |                   |         |          |         |      |
| GO:0000956     | 3.49951970397202e-38 |                                                                     | 55.0904547726137 |                   |          | 1.04082762438586  |         |          |         |      |
| 31             | 169                  | nuclear-transcribed mRNA catabolic process                          |                  |                   |          |                   |         |          |         |      |
| GO:0034623     | 9.26909437636963e-38 |                                                                     | 53.1455268869062 |                   |          | 1.07162134108366  |         |          |         |      |
| 31             | 174                  | cellular macromolecular complex disassembly                         |                  |                   |          |                   |         |          |         |      |
| GO:0006402     | 1.97576698886417e-37 |                                                                     | 51.684846352334  | 1.09625631444191  |          |                   |         |          |         | 31   |
| 178            | mRNA                 | catabolic process                                                   |                  |                   |          |                   |         |          |         |      |
| GO:0032984     | 2.38021148919808e-37 |                                                                     | 51.3320130475303 |                   |          | 1.10241505778147  |         |          |         |      |
| 31             | 179                  | macromolecular complex disassembly                                  |                  |                   |          |                   |         |          |         |      |
| GO:0072594     | 3.91513174939744e-37 |                                                                     | 46.3157894736842 |                   |          | 1.2563836412705   |         |          |         | 32   |

Stable4\_20PerPair

|                                                               |                                                     |                                                                     |                  |                   |      |                   |  |                    |
|---------------------------------------------------------------|-----------------------------------------------------|---------------------------------------------------------------------|------------------|-------------------|------|-------------------|--|--------------------|
| 204                                                           | establishment of protein localization to organelle  |                                                                     |                  |                   |      |                   |  |                    |
| GO:0006401                                                    |                                                     | 2.08165844613826e-35                                                | 43.5818470075307 |                   |      |                   |  | 1.26254238461006   |
| 31                                                            | 205 RNA catabolic process                           |                                                                     |                  |                   |      |                   |  |                    |
| GO:0019058                                                    |                                                     | 2.57901084196969e-35                                                | 39.9555673102354 |                   |      |                   |  | 1.42266971143865   |
| 32                                                            | 231 viral infectious cycle                          |                                                                     |                  |                   |      |                   |  |                    |
| GO:0022415                                                    |                                                     | 1.31789591896921e-33                                                | 34.8020929516774 |                   |      |                   |  | 1.60127326828593   |
| 32                                                            | 260 viral reproductive process                      |                                                                     |                  |                   |      |                   |  |                    |
| GO:0071845                                                    |                                                     | 7.43165661525524e-31                                                | 29.8063922584162 |                   |      |                   |  | 1.7490831084354 31 |
| 284                                                           | cellular component disassembly at cellular level    |                                                                     |                  |                   |      |                   |  |                    |
| GO:0022411                                                    |                                                     | 1.15646006109395e-30                                                | 29.3341607406414 |                   |      |                   |  | 1.77371808179365   |
| 31                                                            | 288 cellular component disassembly                  |                                                                     |                  |                   |      |                   |  |                    |
| GO:0006605                                                    |                                                     | 4.45999507696312e-29                                                | 20.5561883067578 |                   |      |                   |  | 2.91924434295204   |
| 35                                                            | 474 protein targeting                               |                                                                     |                  |                   |      |                   |  |                    |
| GO:0033365                                                    |                                                     | 8.38935600606502e-28                                                | 19.6057983019259 |                   |      |                   |  | 2.91308559961248   |
| 34                                                            | 473 protein localization to organelle               |                                                                     |                  |                   |      |                   |  |                    |
| GO:0016032                                                    |                                                     | 3.45248063126365e-27                                                | 19.6578947368421 |                   |      |                   |  | 2.77759324614214   |
| 33                                                            | 451 viral reproduction                              |                                                                     |                  |                   |      |                   |  |                    |
| GO:0042274                                                    |                                                     | 6.36193153430945e-08                                                | 65.7005494505494 |                   |      |                   |  | 0.110857380112103  |
| 5                                                             | 18 ribosomal small subunit biogenesis               |                                                                     |                  |                   |      |                   |  |                    |
| GO:0022613                                                    |                                                     | 1.19098339368093e-06                                                | 8.32911392405063 |                   |      |                   |  | 1.38571725140129   |
| 10                                                            | 225 ribonucleoprotein complex biogenesis            |                                                                     |                  |                   |      |                   |  |                    |
| GO:0071843                                                    |                                                     | 2.0552278343414e-06                                                 | 7.81217179813167 |                   |      |                   |  | 1.47193965815514   |
| 10                                                            | 239 cellular component biogenesis at cellular level |                                                                     |                  |                   |      |                   |  |                    |
| GO:0006364                                                    |                                                     | 3.46465097984344e-06                                                | 12.5540608498868 |                   |      |                   |  | 0.640509307314373  |
| 7                                                             | 104 rRNA processing                                 |                                                                     |                  |                   |      |                   |  |                    |
| GO:0042254                                                    |                                                     | 3.69092665497524e-06                                                | 9.96129936082655 |                   |      |                   |  | 0.91765275759463   |
| 8                                                             | 149 ribosome biogenesis                             |                                                                     |                  |                   |      |                   |  |                    |
| GO:0016072                                                    |                                                     | 5.03748474613913e-06                                                | 11.8177835661852 |                   |      |                   |  | 0.67746176735174   |
| 7                                                             | 110 rRNA metabolic process                          |                                                                     |                  |                   |      |                   |  |                    |
| Tissue: Muscle_Skeletal=>Nerve_Tibial Type: asymmetric        |                                                     |                                                                     |                  |                   |      |                   |  |                    |
| SourceGene: RP11-302M6.4(ENSG00000232236.1)                   |                                                     |                                                                     |                  |                   |      |                   |  |                    |
| TargetGeneSet: RPS8 RP11 RP4 CAMSAP2 SLC35F3 EIF3FP3 FGF5 CTB |                                                     |                                                                     |                  |                   |      |                   |  |                    |
| HLA-DOA RPL10A ESRP1 BAALC RPS6 RPL12 RPL7A LINC00173 RPS15A  |                                                     |                                                                     |                  |                   |      |                   |  |                    |
| RPL26 CCDC144C CDR2L NFATC1 CTD FTL RPL28 FIZ1 ZNF787         |                                                     |                                                                     |                  |                   |      |                   |  |                    |
| RPL10                                                         |                                                     |                                                                     |                  |                   |      |                   |  |                    |
| GOBPID                                                        | Pvalue                                              | OddsRatio                                                           | ExpCount         | Count             | Size | Term              |  |                    |
| GO:0006415                                                    |                                                     | 1.64695369752928e-15                                                | 143.171840354767 |                   |      | 0.12594284132586  |  |                    |
| 9                                                             | 91                                                  | translational termination                                           |                  |                   |      |                   |  |                    |
| GO:0006414                                                    |                                                     | 6.25396002161484e-15                                                | 122.173295454545 |                   |      | 0.1453186630683 9 |  |                    |
| 105                                                           | 105                                                 | translational elongation                                            |                  |                   |      |                   |  |                    |
| GO:0006614                                                    |                                                     | 6.25396002161484e-15                                                | 122.173295454545 |                   |      | 0.1453186630683 9 |  |                    |
| 105                                                           | 105                                                 | SRP-dependent cotranslational protein targeting to membrane         |                  |                   |      |                   |  |                    |
| GO:0006613                                                    |                                                     | 6.8295141899155e-15                                                 | 120.9053420806   | 0.146702650335617 |      | 9                 |  |                    |
| 106                                                           | 106                                                 | cotranslational protein targeting to membrane                       |                  |                   |      |                   |  |                    |
| GO:0045047                                                    |                                                     | 6.8295141899155e-15                                                 | 120.9053420806   | 0.146702650335617 |      | 9                 |  |                    |
| 106                                                           | 106                                                 | protein targeting to ER                                             |                  |                   |      |                   |  |                    |
| GO:0072599                                                    |                                                     | 6.8295141899155e-15                                                 | 120.9053420806   | 0.146702650335617 |      | 9                 |  |                    |
| 106                                                           | 106                                                 | establishment of protein localization to endoplasmic reticulum      |                  |                   |      |                   |  |                    |
| GO:0070972                                                    |                                                     | 1.84411327786449e-14                                                | 107.504587155963 |                   |      | 0.163310497543423 |  |                    |
| 9                                                             | 118                                                 | protein localization to endoplasmic reticulum                       |                  |                   |      |                   |  |                    |
| GO:0000184                                                    |                                                     | 1.99361931307001e-14                                                | 106.519834710744 |                   |      | 0.16469448481074  |  |                    |
| 9                                                             | 119                                                 | nuclear-transcribed mRNA catabolic process, nonsense-mediated decay |                  |                   |      |                   |  |                    |
| GO:0019080                                                    |                                                     | 1.77829104397303e-13                                                | 82.330985915493  | 0.208982077364888 |      | 9                 |  |                    |
| 151                                                           | 151                                                 | viral genome expression                                             |                  |                   |      |                   |  |                    |
| GO:0019083                                                    |                                                     | 1.77829104397303e-13                                                | 82.330985915493  | 0.208982077364888 |      | 9                 |  |                    |
| 151                                                           | 151                                                 | viral transcription                                                 |                  |                   |      |                   |  |                    |
| GO:0006413                                                    |                                                     | 1.8889053476204e-13                                                 | 81.7495232040687 |                   |      | 0.210366064632205 |  |                    |
| 9                                                             | 152                                                 | translational initiation                                            |                  |                   |      |                   |  |                    |
| GO:0006612                                                    |                                                     | 2.00557506904523e-13                                                | 81.1761363636364 |                   |      | 0.211750051899523 |  |                    |
| 9                                                             | 153                                                 | protein targeting to membrane                                       |                  |                   |      |                   |  |                    |
| GO:0043624                                                    |                                                     | 2.00557506904523e-13                                                | 81.1761363636364 |                   |      | 0.211750051899523 |  |                    |
| 9                                                             | 153                                                 | cellular protein complex disassembly                                |                  |                   |      |                   |  |                    |
| GO:0043241                                                    |                                                     | 2.69020382903067e-13                                                | 78.424649176327  | 0.218669988236108 |      | 9                 |  |                    |

Stable4\_20PerPair

|                                                                |                             |                                                                     |                    |   |     |  |  |                    |
|----------------------------------------------------------------|-----------------------------|---------------------------------------------------------------------|--------------------|---|-----|--|--|--------------------|
| 158                                                            | protein complex disassembly |                                                                     |                    |   |     |  |  |                    |
| GO:0000956                                                     | 4.96844691928321e-13        | 72.9767045454546                                                    |                    |   |     |  |  | 0.233893848176597  |
| 9                                                              | 169                         | nuclear-transcribed mRNA catabolic process                          |                    |   |     |  |  |                    |
| GO:0034623                                                     | 6.47784464322384e-13        | 70.7404958677686                                                    |                    |   |     |  |  | 0.240813784513182  |
| 9                                                              | 174                         | cellular macromolecular complex disassembly                         |                    |   |     |  |  |                    |
| GO:0006402                                                     | 7.96437183648954e-13        | 69.0467993544917                                                    |                    |   |     |  |  | 0.246349733582451  |
| 9                                                              | 178                         | mRNA catabolic process                                              |                    |   |     |  |  |                    |
| GO:0032984                                                     | 8.38021161068123e-13        | 68.6358288770054                                                    |                    |   |     |  |  | 0.247733720849768  |
| 9                                                              | 179                         | macromolecular complex disassembly                                  |                    |   |     |  |  |                    |
| GO:0072594                                                     | 2.74006229750891e-12        | 59.7314685314685                                                    |                    |   |     |  |  | 0.282333402532697  |
| 9                                                              | 204                         | establishment of protein localization to organelle                  |                    |   |     |  |  |                    |
| GO:0006401                                                     | 2.86389527912518e-12        | 59.4225417439703                                                    |                    |   |     |  |  | 0.283717389800014  |
| 9                                                              | 205                         | RNA catabolic process                                               |                    |   |     |  |  |                    |
| GO:0019058                                                     | 8.40737870340574e-12        | 52.3673218673219                                                    |                    |   |     |  |  | 0.31970105875026   |
| 9                                                              | 231                         | viral infectious cycle                                              |                    |   |     |  |  |                    |
| GO:0022415                                                     | 2.43158646465357e-11        | 46.2223831944947                                                    |                    |   |     |  |  | 0.359836689502457  |
| 9                                                              | 260                         | viral reproductive process                                          |                    |   |     |  |  |                    |
| GO:0071845                                                     | 5.35711693096786e-11        | 42.1170247933884                                                    |                    |   |     |  |  | 0.393052383918068  |
| 9                                                              | 284                         | cellular component disassembly at cellular level                    |                    |   |     |  |  |                    |
| GO:0022411                                                     | 6.06971959474303e-11        | 41.5014662756598                                                    |                    |   |     |  |  | 0.398588332987337  |
| 9                                                              | 288                         | cellular component disassembly                                      |                    |   |     |  |  |                    |
| GO:0016032                                                     | 3.21091968451894e-09        | 25.8948992184286                                                    |                    |   |     |  |  | 0.62417825756003   |
| 9                                                              | 451                         | viral reproduction                                                  |                    |   |     |  |  |                    |
| GO:0033365                                                     | 4.87194104762567e-09        | 24.6283307210031                                                    |                    |   |     |  |  | 0.654625977441008  |
| 9                                                              | 473                         | protein localization to organelle                                   |                    |   |     |  |  |                    |
| GO:0006605                                                     | 4.96274204060114e-09        | 24.5736070381232                                                    |                    |   |     |  |  | 0.656009964708325  |
| 9                                                              | 474                         | protein targeting                                                   |                    |   |     |  |  |                    |
| GO:0022613                                                     | 1.12128380665978e-05        | 21.5318181818182                                                    |                    |   |     |  |  | 0.311397135146357  |
| 5                                                              | 225                         | ribonucleoprotein complex biogenesis                                |                    |   |     |  |  |                    |
| GO:0071843                                                     | 1.50187593401244e-05        | 20.2236467236467                                                    |                    |   |     |  |  | 0.330772956888797  |
| 5                                                              | 239                         | cellular component biogenesis at cellular level                     |                    |   |     |  |  |                    |
| Tissue: Muscle_skeletal=>Nerve_Tibial Type: asymmetric         |                             |                                                                     |                    |   |     |  |  |                    |
| SourceGene: RP11-307I14.2(ENSG00000220105.2)                   |                             |                                                                     |                    |   |     |  |  |                    |
| TargetGeneSet: RP4 RP11 RPL11 RPS3A RPL10A EPHB6 RPS20 RPL7    |                             |                                                                     |                    |   |     |  |  |                    |
| POLR1E USP2 GEMIN2 RPS3AP6 RPL17                               |                             |                                                                     |                    |   |     |  |  |                    |
| GOBPID Pvalue OddsRatio ExpCount Count Size Term               |                             |                                                                     |                    |   |     |  |  |                    |
| GO:0006415                                                     | 4.7286271313409e-11         | 168.870588235294                                                    |                    |   |     |  |  | 0.0755657047955159 |
| 6                                                              | 91                          | translational termination                                           |                    |   |     |  |  |                    |
| GO:0006414                                                     | 1.13596912439202e-10        | 144.848484848485                                                    |                    |   |     |  |  | 0.0871911978409799 |
| 6                                                              | 105                         | translational elongation                                            |                    |   |     |  |  |                    |
| GO:0006614                                                     | 1.13596912439202e-10        | 144.848484848485                                                    |                    |   |     |  |  | 0.0871911978409799 |
| 6                                                              | 105                         | SRP-dependent cotranslational protein targeting to membrane         |                    |   |     |  |  |                    |
| GO:0006613                                                     | 1.20369630057904e-10        | 143.39                                                              | 0.0880215902013702 | 6 | 106 |  |  |                    |
| cotranslational protein targeting to membrane                  |                             |                                                                     |                    |   |     |  |  |                    |
| GO:0045047                                                     | 1.20369630057904e-10        | 143.39                                                              | 0.0880215902013702 | 6 | 106 |  |  |                    |
| protein targeting to ER                                        |                             |                                                                     |                    |   |     |  |  |                    |
| GO:0072599                                                     | 1.20369630057904e-10        | 143.39                                                              | 0.0880215902013702 | 6 | 106 |  |  |                    |
| establishment of protein localization to endoplasmic reticulum |                             |                                                                     |                    |   |     |  |  |                    |
| GO:0070972                                                     | 2.31510341395467e-10        | 127.919642857143                                                    |                    |   |     |  |  | 0.0979862985260536 |
| 6                                                              | 118                         | protein localization to endoplasmic reticulum                       |                    |   |     |  |  |                    |
| GO:0000184                                                     | 2.43715605442804e-10        | 126.778761061947                                                    |                    |   |     |  |  | 0.0988166908864438 |
| 6                                                              | 119                         | nuclear-transcribed mRNA catabolic process, nonsense-mediated decay |                    |   |     |  |  |                    |
| GO:0019080                                                     | 1.03374025467577e-09        | 98.5793103448276                                                    |                    |   |     |  |  | 0.125389246418933  |
| 6                                                              | 151                         | viral genome expression                                             |                    |   |     |  |  |                    |
| GO:0019083                                                     | 1.03374025467577e-09        | 98.5793103448276                                                    |                    |   |     |  |  | 0.125389246418933  |
| 6                                                              | 151                         | viral transcription                                                 |                    |   |     |  |  |                    |
| GO:0006413                                                     | 1.07583659143465e-09        | 97.8972602739726                                                    |                    |   |     |  |  | 0.126219638779323  |
| 6                                                              | 152                         | translational initiation                                            |                    |   |     |  |  |                    |
| GO:0006612                                                     | 1.11934651153124e-09        | 97.2244897959184                                                    |                    |   |     |  |  | 0.127050031139714  |
| 6                                                              | 153                         | protein targeting to membrane                                       |                    |   |     |  |  |                    |
| GO:0043624                                                     | 1.11934651153124e-09        | 97.2244897959184                                                    |                    |   |     |  |  | 0.127050031139714  |
| 6                                                              | 153                         | cellular protein complex disassembly                                |                    |   |     |  |  |                    |
| GO:0043241                                                     | 1.35943709635315e-09        | 93.9934210526316                                                    |                    |   |     |  |  | 0.131201992941665  |

Stable4\_20PerPair

|                                                     |        |                                                     |                  |                   |           |                    |          |                   |           |      |
|-----------------------------------------------------|--------|-----------------------------------------------------|------------------|-------------------|-----------|--------------------|----------|-------------------|-----------|------|
| 6                                                   | 158    | protein complex disassembly                         |                  |                   |           |                    |          |                   |           |      |
| GO:0000956                                          |        | 2.04064203149548e-09                                | 87.5828220858896 |                   |           |                    |          | 0.140336308905958 |           |      |
| 6                                                   | 169    | nuclear-transcribed mRNA catabolic process          |                  |                   |           |                    |          |                   |           |      |
| GO:0034623                                          |        | 2.43273019696167e-09                                | 84.9464285714286 |                   |           |                    |          | 0.144488270707909 |           |      |
| 6                                                   | 174    | cellular macromolecular complex disassembly         |                  |                   |           |                    |          |                   |           |      |
| GO:0006402                                          |        | 2.78967451431039e-09                                | 82.9476744186046 |                   |           |                    |          | 0.147809840149471 |           |      |
| 6                                                   | 178    | mRNA catabolic process                              |                  |                   |           |                    |          |                   |           |      |
| GO:0032984                                          |        | 2.885389111653e-09                                  | 82.4624277456647 |                   |           |                    |          | 0.148640232509861 |           |      |
| 6                                                   | 179    | macromolecular complex disassembly                  |                  |                   |           |                    |          |                   |           |      |
| GO:0072594                                          |        | 6.33155322571186e-09                                | 71.9242424242424 |                   |           |                    |          | 0.169400041519618 |           |      |
| 6                                                   | 204    | establishment of protein localization to organelle  |                  |                   |           |                    |          |                   |           |      |
| GO:0006401                                          |        | 6.52010748867559e-09                                | 71.5577889447236 |                   |           |                    |          | 0.170230433880008 |           |      |
| 6                                                   | 205    | RNA catabolic process                               |                  |                   |           |                    |          |                   |           |      |
| GO:0019058                                          |        | 1.33344527646106e-08                                | 63.1733333333333 |                   |           |                    |          | 0.191820635250156 |           |      |
| 6                                                   | 231    | viral infectious cycle                              |                  |                   |           |                    |          |                   |           |      |
| GO:0022415                                          |        | 2.70267879691018e-08                                | 55.8464566929134 |                   |           |                    |          | 0.215902013701474 |           |      |
| 6                                                   | 260    | viral reproductive process                          |                  |                   |           |                    |          |                   |           |      |
| GO:0071845                                          |        | 4.57347393629197e-08                                | 50.9388489208633 |                   |           |                    |          | 0.235831430350841 |           |      |
| 6                                                   | 284    | cellular component disassembly at cellular level    |                  |                   |           |                    |          |                   |           |      |
| GO:0022411                                          |        | 4.97033799076331e-08                                | 50.2021276595745 |                   |           |                    |          | 0.239152999792402 |           |      |
| 6                                                   | 288    | cellular component disassembly                      |                  |                   |           |                    |          |                   |           |      |
| GO:0016032                                          |        | 7.04124660609916e-07                                | 31.447191011236  | 0.374506954536018 |           |                    |          |                   | 6         |      |
| 451                                                 |        | viral reproduction                                  |                  |                   |           |                    |          |                   |           |      |
| GO:0033365                                          |        | 9.30996519068124e-07                                | 29.9186295503212 |                   |           |                    |          | 0.392775586464605 |           |      |
| 6                                                   | 473    | protein localization to organelle                   |                  |                   |           |                    |          |                   |           |      |
| GO:0006605                                          |        | 9.42588157413463e-07                                | 29.8525641025641 |                   |           |                    |          | 0.393605978824995 |           |      |
| 6                                                   | 474    | protein targeting                                   |                  |                   |           |                    |          |                   |           |      |
| Tissue: Muscle_skeletal=>Skin_Sun_Exposed_Lower_leg |        |                                                     |                  |                   |           |                    |          | Type: asymmetric  |           |      |
| SourceGene:                                         |        | CDKN2D(ENSG00000129355.5)                           |                  |                   |           |                    |          |                   |           |      |
| TargetGeneSet:                                      |        | CLCN6                                               | SNHG3            | ZNF691            | PALMD     | FCGR1B             | PPIAL4B  | CHD1L             | PRUNE     | SHC1 |
| RHBG                                                | SUPT7L | PLB1                                                | MTHFD2           | EN1               | TANC1     | SLC6A6             | RP11     | NBEAL2            | MRPS18AP1 |      |
| QRICH1                                              | HNRPD  | CCDC127                                             | NSUN2            | LIFR-AS1          |           | LARP1              | BEND3    | MTHFD1L           | MEOX2     |      |
| TRIM4                                               | YBX1P2 | CHPF2                                               | TNFRSF10B        |                   | HEATR7A   | MIRLET7D           |          | FPGS              | OTUD1     |      |
| LZTS2                                               | PTPRE  | CTD                                                 | METT15           | TBRG1             | DHX37     | SPRY2              | CBLN3    | CDKL1             | CRIP2     |      |
| CYP19A1                                             | SCAPER | CLCN7                                               | EME2             | CA4               | LINC00338 |                    | NPLOC4   | ZNF844            | LGI4      |      |
| CAPN12                                              | RTN2   | ETFB                                                | FAM113A          | ASXL1             | TRAPPC10  |                    | FTCD     | PI4KA             | CES5AP1   |      |
| SREBF2                                              | NOX1   | MTMR1                                               |                  |                   |           |                    |          |                   |           |      |
| GOBPID                                              | Pvalue | OddsRatio                                           | ExpCount         | Count             | Size      | Term               |          |                   |           |      |
| GO:0006730                                          |        | 4.40453268055253e-08                                | 66.5694444444444 |                   |           | 0.0996470832468341 |          |                   |           |      |
| 5                                                   | 32     | one-carbon metabolic process                        |                  |                   |           |                    |          |                   |           |      |
| GO:0006760                                          |        | 6.95682568325645e-07                                | 73.8741976893453 |                   |           | 0.071621341083662  |          |                   |           |      |
| 4                                                   | 23     | folic acid-containing compound metabolic process    |                  |                   |           |                    |          |                   |           |      |
| GO:0009396                                          |        | 3.33486209636152e-06                                | 146.928571428571 |                   |           | 0.0311397135146357 |          |                   |           |      |
| 3                                                   | 10     | folic acid-containing compound biosynthetic process |                  |                   |           |                    |          |                   |           |      |
| GO:0042558                                          |        | 4.00301924421348e-06                                | 45.2399685287175 |                   |           | 0.108988997301225  |          |                   |           |      |
| 4                                                   | 35     | pteridine-containing compound metabolic process     |                  |                   |           |                    |          |                   |           |      |
| GO:0046653                                          |        | 1.5360388194886e-05                                 | 79.0824175824176 |                   |           | 0.0498235416234171 |          |                   |           |      |
| 3                                                   | 16     | tetrahydrofolate metabolic process                  |                  |                   |           |                    |          |                   |           |      |
| Tissue: Muscle_skeletal=>Skin_Sun_Exposed_Lower_leg |        |                                                     |                  |                   |           |                    |          | Type: asymmetric  |           |      |
| SourceGene:                                         |        | CELA2B(ENSG00000215704.4)                           |                  |                   |           |                    |          |                   |           |      |
| TargetGeneSet:                                      |        | MTND1P23                                            | CELA2A           | CELA3B            | CELA3A    | ODF2L              | REG1A    | LARS2             | RP11      |      |
| CLPS                                                | RP1    | CPA2                                                | CPA1             | PRSS1             | PNLIP     | PNLIPRP1           | PNLIPRP2 |                   |           |      |
| PLA2G1B                                             | GP2    | CTRB1                                               | THAP8            | DHDH              | KLK3      | NXT1               | ETS2     | CECR9             |           |      |
| GOBPID                                              | Pvalue | OddsRatio                                           | ExpCount         | Count             | Size      | Term               |          |                   |           |      |
| GO:0007586                                          |        | 1.21835570087734e-10                                | 70.2352941176471 |                   |           | 0.158397342744447  |          |                   |           |      |
| 7                                                   | 109    | digestion                                           |                  |                   |           |                    |          |                   |           |      |
| GO:0044241                                          |        | 4.45140475278301e-09                                | 308.427807486631 |                   |           | 0.021797799460245  |          |                   |           |      |
| 4                                                   | 15     | lipid digestion                                     |                  |                   |           |                    |          |                   |           |      |
| Tissue: Muscle_skeletal=>Skin_Sun_Exposed_Lower_leg |        |                                                     |                  |                   |           |                    |          | Type: asymmetric  |           |      |
| SourceGene:                                         |        | CHPT1(ENSG00000111666.5)                            |                  |                   |           |                    |          |                   |           |      |
| TargetGeneSet:                                      |        | RPL11                                               | TAF12            | ALG6              | PRUNE     | PSMB4              | BRP44    | C1orf35           | HIST3H2A  |      |
| RAB4A                                               | RPS7   | UCN                                                 | DPY30            | UBC               | TPRKB     | COX5B              | OXSM     | DALRD3            | RASSF1    | LIAS |
| NUDT10                                              | OSTC   | PRMT10                                              | UBE2B            | CAMLG             | MRPL22    | CTB                | C6orf130 | MRPL2             |           |      |

Stable4\_20PerPair

|                          |                                             |                      |          |                  |           |                   |         |                                                             |            |                    |
|--------------------------|---------------------------------------------|----------------------|----------|------------------|-----------|-------------------|---------|-------------------------------------------------------------|------------|--------------------|
| COX7A2                   | ASF1A                                       | C6orf72              | GTF2H5   | BRP44L           | LINC00174 | TMEM60            | FNTA    | C8orf76                                                     |            |                    |
| MAPK15                   | C9orf123                                    |                      | CCL19    | RP11             | CLTA      | FAM206A           | ENTPD2  | ATP5C1                                                      | FAM188A    |                    |
| COMMD3                   | CUL2                                        | RPL13AP5             |          | CPXM2            | RARRES3   | KBTBD3            | PLEKHG6 | GNP3                                                        | MRP63      | GPX2               |
| COX16                    | C15orf24                                    |                      | C16orf48 |                  | RPS7P1    | CCL13             | RPL27   | ARHGAP27                                                    |            |                    |
| C18orf32                 |                                             | SEC11C               | XAB2     | SLC25A42         |           | FAM98C            | CLDND2  | TNNI3                                                       | TRAPPC2    |                    |
| SPEF1                    | CDK5RAP1                                    |                      | PSMA7    | ATP5J            | PMM1      | IL3RA             | COX7B   | PSMD10                                                      |            |                    |
| GOBPID                   | Pvalue                                      | OddsRatio            |          | ExpCount         |           | Count             | Size    | Term                                                        |            |                    |
| GO:0031398               |                                             | 1.68165736274848e-05 |          | 127              |           | 12.6340023612751  |         | positive regulation of protein ubiquitination               |            | 0.544875787142758  |
| 6                        | 127                                         |                      |          |                  |           |                   |         |                                                             |            |                    |
| Tissue:                  | Muscle_Skeletal=>Skin_Sun_Exposed_Lower_leg |                      |          |                  |           |                   |         | Type:                                                       | asymmetric |                    |
| SourceGene:              | CTD-2576F9.2(ENSG00000260521.1)             |                      |          |                  |           |                   |         |                                                             |            |                    |
| TargetGeneSet:           | RP1                                         | AKIRIN1              | RP11     | USP21            | HNRNPU    | COQ10B            | ZNF654  | ERAP1                                                       |            |                    |
| ZCCHC10                  | DIAPH1                                      | PGBD1                | DDX56    | RPS3AP34         | PTDSS1    | PABPC1            | FAM91A1 | ATP6V1G1                                                    |            |                    |
| FAM73B                   | ACBD5                                       | FAM35A               | EIF6     | BBOX1            | AHNAK     | STT3A             | GOLT1B  | CCDC65                                                      | PCBP2      | TBK1               |
| ACTR6                    | ABHD13                                      | SLC22A17             |          | MBIP             | MED6      | YLPM1             | WDR76   | CTD                                                         | CDH1       |                    |
| TERF2IP                  | RP13                                        | RPA1                 | DYNLL2   | EEF2             | PRKCSH    | WDR83             | ZNF506  | SS18L1                                                      | OSBPL2     |                    |
| MAFIPL                   | SMC1A                                       | MSN                  |          |                  |           |                   |         |                                                             |            |                    |
| GOBPID                   | Pvalue                                      | OddsRatio            |          | ExpCount         |           | Count             | Size    | Term                                                        |            |                    |
| GO:0000377               |                                             | 7.24601949011397e-07 |          | 16.8390862944162 |           | 16.8390862944162  |         | RNA splicing, via transesterification reactions with bulged |            | 0.522316794685489  |
| 7                        | 204                                         |                      |          |                  |           |                   |         |                                                             |            |                    |
| adenosine as nucleophile |                                             |                      |          |                  |           |                   |         |                                                             |            |                    |
| GO:0000398               |                                             | 7.24601949011397e-07 |          | 16.8390862944162 |           | 16.8390862944162  |         | nuclear mRNA splicing, via spliceosome                      |            | 0.522316794685489  |
| 7                        | 204                                         |                      |          |                  |           |                   |         |                                                             |            |                    |
| GO:0000375               |                                             | 8.52766533219009e-07 |          | 16.416501650165  |           | 0.535118676908172 |         | RNA splicing, via transesterification reactions             |            | 7                  |
| 209                      |                                             |                      |          |                  |           |                   |         |                                                             |            |                    |
| GO:0008380               |                                             | 1.5104647807121e-05  |          | 10.4099156118143 |           | 10.4099156118143  |         | RNA splicing                                                |            | 0.827001591585357  |
| 7                        | 323                                         |                      |          |                  |           |                   |         |                                                             |            |                    |
| Tissue:                  | Muscle_Skeletal=>Skin_Sun_Exposed_Lower_leg |                      |          |                  |           |                   |         | Type:                                                       | asymmetric |                    |
| SourceGene:              | ENSG00000232926.1                           |                      |          |                  |           |                   |         |                                                             |            |                    |
| TargetGeneSet:           | PGD                                         | CTPS                 | SZT2     | RP4              | NAP1L4P1  | RP11              | MLLT11  | CCT3                                                        |            |                    |
| ARHGEF11                 | GDF7                                        | SLC5A6               | FNDC4    | RPL36AP15        | MREG      | TRIP12            | SLC4A7  |                                                             |            |                    |
| NT5DC2                   | HTR1F                                       | LRRC58               | KPNA1    | SEC61A1          | SRPRB     | UBQLN4P1          | LETM1   | MT1P2                                                       |            |                    |
| ACSL1                    | NSUN2                                       | SV2C                 | HOMER1   | VDAC1            | LARP1     | PRELID1           | E2F3    | XPO5                                                        | RP1        |                    |
| BEND3                    | LINC00473                                   |                      | FBXL18   | SEPT7P3          | TRRAP     | TRIM4             | TFR2    | ADCK2                                                       | ABCF2      |                    |
| UBE3C                    | PRKDC                                       | MAPRE1P1             |          | HEATR7A          | FAM120A   | DDX21             | UNC5B   | TMEM123                                                     | NOLC1      |                    |
| TP53I11                  | RPS6KA4                                     | PITPNM1              | PCSK7    | MARS             | CYP27B1   | XPOT              | MVK     | EP400                                                       | MYCBP2     |                    |
| IFI27L2                  | TYRO3                                       | COX5A                | ZNF592   | FURIN            | TRAF7     | CTD               | FAM86A  | USP7                                                        | ABCC1      |                    |
| SLC7A5                   | ACACA                                       | ACLY                 | PSME3    | PYCR1            | FASN      | LMNB2             | PNPLA6  | DNMT1                                                       | CILP2      |                    |
| TMEM145                  | GART                                        | TRAPPC10             |          | SEPT5            | PPPDE2    | SREBF2            | PNPLA3  | HUWE1                                                       | ZMAT1      |                    |
| ZDHC9                    | NSDHL                                       |                      |          |                  |           |                   |         |                                                             |            |                    |
| GOBPID                   | Pvalue                                      | OddsRatio            |          | ExpCount         |           | Count             | Size    | Term                                                        |            |                    |
| GO:0035338               |                                             | 1.64408893497176e-06 |          | 60.3571428571429 |           | 60.3571428571429  |         | long-chain fatty-acyl-CoA biosynthetic process              |            | 0.0896823749221507 |
| 4                        | 18                                          |                      |          |                  |           |                   |         |                                                             |            |                    |
| GO:0035336               |                                             | 2.58360213421859e-06 |          | 52.8051470588235 |           | 52.8051470588235  |         | long-chain fatty-acyl-CoA metabolic process                 |            | 0.0996470832468341 |
| 4                        | 20                                          |                      |          |                  |           |                   |         |                                                             |            |                    |
| GO:0046949               |                                             | 2.58360213421859e-06 |          | 52.8051470588235 |           | 52.8051470588235  |         | fatty-acyl-CoA biosynthetic process                         |            | 0.0996470832468341 |
| 4                        | 20                                          |                      |          |                  |           |                   |         |                                                             |            |                    |
| GO:0035384               |                                             | 3.17951037573131e-06 |          | 49.6955017301038 |           | 49.6955017301038  |         | thioester biosynthetic process                              |            | 0.104629437409176  |
| 4                        | 21                                          |                      |          |                  |           |                   |         |                                                             |            |                    |
| GO:0071616               |                                             | 3.17951037573131e-06 |          | 49.6955017301038 |           | 49.6955017301038  |         | acyl-CoA biosynthetic process                               |            | 0.104629437409176  |
| 4                        | 21                                          |                      |          |                  |           |                   |         |                                                             |            |                    |
| GO:0035337               |                                             | 5.5816118277697e-06  |          | 42.2323529411765 |           | 42.2323529411765  |         | fatty-acyl-CoA metabolic process                            |            | 0.119576499896201  |
| 4                        | 24                                          |                      |          |                  |           |                   |         |                                                             |            |                    |
| GO:0019432               |                                             | 6.35430074420932e-06 |          | 22.2807835820896 |           | 22.2807835820896  |         | triglyceride biosynthetic process                           |            | 0.26406477060411   |
| 5                        | 53                                          |                      |          |                  |           |                   |         |                                                             |            |                    |
| GO:0046460               |                                             | 7.64369646350815e-06 |          | 21.3865671641791 |           | 21.3865671641791  |         | neutral lipid biosynthetic process                          |            | 0.274029478928794  |
| 5                        | 55                                          |                      |          |                  |           |                   |         |                                                             |            |                    |
| GO:0046463               |                                             | 7.64369646350815e-06 |          | 21.3865671641791 |           | 21.3865671641791  |         | acylglycerol biosynthetic process                           |            | 0.274029478928794  |
| 5                        | 55                                          |                      |          |                  |           |                   |         |                                                             |            |                    |
| Tissue:                  | Muscle_Skeletal=>Skin_Sun_Exposed_Lower_leg |                      |          |                  |           |                   |         | Type:                                                       | asymmetric |                    |
| SourceGene:              | ENSG00000235978.2                           |                      |          |                  |           |                   |         |                                                             |            |                    |
| TargetGeneSet:           | RP11                                        | WDR3                 | TMOD4    | UCK2             | ADCY3     | SLC5A6            | CAD     | RGPD2                                                       |            |                    |
| PIKFYVE                  | NT5DC2                                      | C3orf26              | PLXNA1   | HES1             | LETM1     | TBC1D14           | LARP1   | NOP16                                                       | PAK1IP1    |                    |

Stable4\_20PerPair

| GO:ID          | Pvalue                                      | OddsRatio            | ExpCount         | Count              | Size              | Term               |
|----------------|---------------------------------------------|----------------------|------------------|--------------------|-------------------|--------------------|
| GO:0009156     | 5                                           | 2.8836915130135e-08  | 72.9361054766734 |                    |                   | 0.0917583558231264 |
| GO:0009124     | 5                                           | 4.49086546209502e-08 | 66.0845588235294 |                    |                   | 0.0998546813369317 |
| GO:0009161     | 5                                           | 5.90853733529536e-08 | 62.1885813148789 |                    |                   | 0.105252231679469  |
| GO:0009123     | 5                                           | 1.38749459309604e-07 | 51.5459110473458 |                    |                   | 0.124143657878348  |
| GO:0009112     | 63                                          | 6.88112536845422e-07 | 36.394523326572  |                    | 0.170022835789911 | 5                  |
| GO:0009260     | 5                                           | 4.08040004898645e-06 | 24.7871972318339 |                    |                   | 0.242889765414158  |
| Tissue:        | Skin_sun_Exposed_Lower_leg=>Muscle_Skeletal |                      |                  |                    | Type:             | asymmetric         |
| SourceGene:    | ENSG00000236935.1                           |                      |                  |                    |                   |                    |
| TargetGeneSet: | SFPQ                                        | ACBD6                | RP11             | RPL10A             | RPL35             | RPS25              |
| RPL13          | SNORD12                                     | ARSFP1               |                  |                    |                   | RPL41              |
| RPL1           |                                             |                      |                  |                    |                   |                    |
| GO:ID          | Pvalue                                      | OddsRatio            | ExpCount         | Count              | Size              | Term               |
| GO:0006415     | 6                                           | 1.46219002870474e-12 | 506.752941176471 |                    |                   | 0.0503771365303439 |
| GO:0006414     | 6                                           | 3.52440227959429e-12 | 434.666666666667 |                    |                   | 0.0581274652273199 |
| GO:0006614     | 6                                           | 3.52440227959429e-12 | 434.666666666667 |                    |                   | 0.0581274652273199 |
| GO:0006613     | 6                                           | 3.73542049121313e-12 | 430.29           | 0.0586810601342468 | 6                 | 106                |
| GO:0045047     | 6                                           | 3.73542049121313e-12 | 430.29           | 0.0586810601342468 | 6                 | 106                |
| GO:0072599     | 6                                           | 3.73542049121313e-12 | 430.29           | 0.0586810601342468 | 6                 | 106                |
| GO:0070972     | 6                                           | 7.20504798139751e-12 | 383.866071428571 |                    |                   | 0.065324199017369  |
| GO:0000184     | 6                                           | 7.58671052977975e-12 | 380.442477876106 |                    |                   | 0.0658777939242959 |
| GO:0019080     | 6                                           | 3.24266868858932e-11 | 295.820689655172 |                    |                   | 0.0835928309459553 |
| GO:0019083     | 6                                           | 3.24266868858932e-11 | 295.820689655172 |                    |                   | 0.0835928309459553 |
| GO:0006413     | 152                                         | 3.37552499800433e-11 | 293.77397260274  | 0.0841464258528822 |                   | 6                  |
| GO:0006612     | 6                                           | 3.51288101484549e-11 | 291.755102040816 |                    |                   | 0.084700020759809  |
| GO:0043624     | 6                                           | 3.51288101484549e-11 | 291.755102040816 |                    |                   | 0.084700020759809  |
| GO:0043241     | 6                                           | 4.27147087778567e-11 | 282.059210526316 |                    |                   | 0.0874679952944433 |
| GO:0000956     | 6                                           | 6.42877757668172e-11 | 262.822085889571 |                    |                   | 0.0935575392706387 |
| GO:0034623     | 6                                           | 7.67317996887295e-11 | 254.910714285714 |                    |                   | 0.096325513805273  |
| GO:0006402     | 6                                           | 8.80746571102475e-11 | 248.912790697674 |                    |                   | 0.0985398934329804 |
| GO:0032984     | 6                                           | 9.11183454247686e-11 | 247.456647398844 |                    |                   | 0.0990934883399073 |
| GO:0072594     | 6                                           | 2.01147052447413e-10 | 215.833333333333 |                    |                   | 0.112933361013079  |
| GO:0006401     | 6                                           | 2.07186910357011e-10 | 214.733668341709 |                    |                   | 0.113486955920006  |



Stable4\_20PerPair

|                                                     |                             |                                                     |                   |
|-----------------------------------------------------|-----------------------------|-----------------------------------------------------|-------------------|
| GO:0019058                                          | 4.26375714687163e-10        | 189.573333333333                                    | 0.127880423500104 |
| 6                                                   | 231                         | viral infectious cycle                              |                   |
| GO:0022415                                          | 8.70238502331617e-10        | 167.586614173228                                    | 0.143934675800983 |
| 6                                                   | 260                         | viral reproductive process                          |                   |
| GO:0071845                                          | 1.48114719337377e-09        | 152.859712230216                                    | 0.157220953567227 |
| 6                                                   | 284                         | cellular component disassembly at cellular level    |                   |
| GO:0022411                                          | 1.61122524367783e-09        | 150.648936170213                                    | 0.159435333194935 |
| 6                                                   | 288                         | cellular component disassembly                      |                   |
| GO:0016032                                          | 2.37432063915819e-08        | 94.3685393258427                                    | 0.249671303024012 |
| 6                                                   | 451                         | viral reproduction                                  |                   |
| GO:0033365                                          | 3.15616285494933e-08        | 89.7815845824411                                    | 0.261850390976403 |
| 6                                                   | 473                         | protein localization to organelle                   |                   |
| GO:0006605                                          | 3.19623654221233e-08        | 89.5833333333333                                    | 0.26240398588333  |
| 6                                                   | 474                         | protein targeting                                   |                   |
| Tissue: Muscle_skeletal=>Skin_Sun_Exposed_Lower_leg |                             |                                                     | Type: cluster     |
| SourceGene:                                         | FABP4(ENSG00000170323.4)    |                                                     |                   |
| TargetGeneSet:                                      | MTND2P28                    | CCNL2                                               | TMEM240           |
| RBBP4                                               | THRAP3                      | JAK1                                                | RPS27             |
| C1orf35                                             | MRPL55                      | KCNK1                                               | C2orf18           |
| TRIP12                                              | MAP4                        | CLDND1                                              | C3orf15           |
| ATG12                                               | HINT1                       | PCDHB6                                              | LARP1             |
| HIPK2                                               | PAF1                        | TTC35                                               | LY6D              |
| ARHGAP12                                            |                             | CHST3                                               | C10orf118         |
| CEP57                                               | KBTBD3                      | TBRG1                                               | GOLGA2B           |
| ARGLU1                                              | DCUN1D2                     | KLHDC2                                              | U6                |
| RHBDF1                                              | FOPNL                       | LONP2                                               | C16orf48          |
| IER3IP1                                             | MALT1                       | FAM69C                                              | FGF22             |
| MPST                                                | TRABD                       | AKAP17A                                             | MAGED1            |
| GOBPID                                              | Pvalue                      | OddsRatio                                           | ExpCount          |
| Tissue: Skin_Sun_Exposed_Lower_leg=>Muscle_skeletal |                             |                                                     | Type: asymmetric  |
| SourceGene:                                         | FAM207BP(ENSG00000228797.2) |                                                     |                   |
| TargetGeneSet:                                      | AHDC1                       | TMEM56                                              | ATP5F1            |
| THUMPD3                                             | GRPEL1                      | PPARGC1A                                            | ATP8A1            |
| KCNK17                                              | FAXC                        | STXBP5                                              | NDUFA4            |
| ISCA1                                               | AS3MT                       | IMMP1L                                              | CYBASC3           |
| UQCRC2                                              | ZNF821                      | CHAD                                                | ATP5H             |
| C21orf33                                            |                             | DNMT3L                                              | C22orf25          |
| GOBPID                                              | Pvalue                      | OddsRatio                                           | ExpCount          |
| GO:0022900                                          | 4.94758116199299e-12        | 34.9071358748778                                    | 0.398726731714068 |
| 10                                                  | 134                         | electron transport chain                            |                   |
| GO:0045333                                          | 2.80930273241364e-10        | 28.4111012826183                                    | 0.422531312711923 |
| 9                                                   | 142                         | cellular respiration                                |                   |
| GO:0022904                                          | 3.37738933946109e-10        | 37.1948051948052                                    | 0.285654971974258 |
| 8                                                   | 96                          | respiratory electron transport chain                |                   |
| GO:0006091                                          | 3.31242845336531e-08        | 11.5333483213429                                    | 1.27354508338523  |
| 11                                                  | 428                         | generation of precursor metabolites and energy      |                   |
| GO:0015980                                          | 2.34362402309278e-07        | 12.5335570469799                                    | 0.913500795792679 |
| 9                                                   | 307                         | energy derivation by oxidation of organic compounds |                   |
| Tissue: Muscle_skeletal=>Skin_Sun_Exposed_Lower_leg |                             |                                                     | Type: cluster     |
| SourceGene:                                         | PLEKHA4(ENSG00000105559.5)  |                                                     |                   |
| TargetGeneSet:                                      | NADK                        | DNAJC11                                             | PGD               |
| BCAR3                                               | TSPAN2                      | FOXE1                                               | SHC1              |
| SLC5A6                                              | CAD                         | CRIM1                                               | MTHFD2            |
| NICN1                                               | PARP9                       | ATR                                                 | RPL22L1           |
| CETN3                                               | SMAD5-AS1                   |                                                     | ZNF225            |
| SLC29A1                                             | MRAP2                       | MDN1                                                | AIM1              |
| TRRAP                                               | AKR1B10                     | GIMAP7                                              | CHD7              |
| NUP188                                              | FAM208B                     | OTUD1                                               | CICP9             |
| AGAP11                                              | EML3                        |                                                     | C11orf68          |
| HOXC10                                              | DNAJC14                     | XPOT                                                | ATP6V0A2          |
| TRAF3                                               | CTD                         | PLA2G4E                                             | WDR73             |
| VPS53                                               | TSR1                        | RP1                                                 | CAMTA2            |
| C17orf28                                            |                             | SGSH                                                | FN3K              |
|                                                     |                             |                                                     | BCL2              |
|                                                     |                             |                                                     | ILF3              |
|                                                     |                             |                                                     | GCDH              |
|                                                     |                             |                                                     | TRMT1             |
|                                                     |                             |                                                     | DPY19L3           |
|                                                     |                             |                                                     | MLL4              |
|                                                     |                             |                                                     | TMEM240           |
|                                                     |                             |                                                     | FBXO44            |
|                                                     |                             |                                                     | ZBTB40            |
|                                                     |                             |                                                     | SYF2              |
|                                                     |                             |                                                     | C1orf63           |
|                                                     |                             |                                                     | VAMP4             |
|                                                     |                             |                                                     | FAM129A           |
|                                                     |                             |                                                     | CNTN2             |
|                                                     |                             |                                                     | PARP1             |
|                                                     |                             |                                                     | UBC               |
|                                                     |                             |                                                     | FAM136A           |
|                                                     |                             |                                                     | DCTN1             |
|                                                     |                             |                                                     | ZFAND2B           |
|                                                     |                             |                                                     | ARAP2             |
|                                                     |                             |                                                     | H2AFZ             |
|                                                     |                             |                                                     | RP11              |
|                                                     |                             |                                                     | MYO10             |
|                                                     |                             |                                                     | DEK               |
|                                                     |                             |                                                     | LEM2              |
|                                                     |                             |                                                     | DEFA6             |
|                                                     |                             |                                                     | PNISR             |
|                                                     |                             |                                                     | C7orf23           |
|                                                     |                             |                                                     | UBAC1             |
|                                                     |                             |                                                     | FAM206A           |
|                                                     |                             |                                                     | COMMD3            |
|                                                     |                             |                                                     | ZEB1-AS1          |
|                                                     |                             |                                                     | CCDC88B           |
|                                                     |                             |                                                     | ANKRD13D          |
|                                                     |                             |                                                     | PICALM            |
|                                                     |                             |                                                     | MTRF1             |
|                                                     |                             |                                                     | TPT1-AS1          |
|                                                     |                             |                                                     | RCN1P2            |
|                                                     |                             |                                                     | ARL6IP4           |
|                                                     |                             |                                                     | NFYB              |
|                                                     |                             |                                                     | NEK9              |
|                                                     |                             |                                                     | WARS              |
|                                                     |                             |                                                     | ANKRD9            |
|                                                     |                             |                                                     | LPCAT4            |
|                                                     |                             |                                                     | AKAP13            |
|                                                     |                             |                                                     | CHD2              |
|                                                     |                             |                                                     | CTD               |
|                                                     |                             |                                                     | SPG7              |
|                                                     |                             |                                                     | TP53              |
|                                                     |                             |                                                     | RPL26             |
|                                                     |                             |                                                     | GSDMB             |
|                                                     |                             |                                                     | CLTC              |
|                                                     |                             |                                                     | CCDC114           |
|                                                     |                             |                                                     | CYTH2             |
|                                                     |                             |                                                     | ZNF772            |
|                                                     |                             |                                                     | KIF3B             |
|                                                     |                             |                                                     | BCL2L13           |
|                                                     |                             |                                                     | RP1               |
|                                                     |                             |                                                     | B3GALNT2          |
|                                                     |                             |                                                     | C2orf28           |
|                                                     |                             |                                                     | COX5B             |
|                                                     |                             |                                                     | GULP1             |
|                                                     |                             |                                                     | ICOS              |
|                                                     |                             |                                                     | RP11              |
|                                                     |                             |                                                     | C5orf63           |
|                                                     |                             |                                                     | SH3RF2            |
|                                                     |                             |                                                     | MRPS18B           |
|                                                     |                             |                                                     | GTF2I             |
|                                                     |                             |                                                     | AGBL3             |
|                                                     |                             |                                                     | MRPS33            |
|                                                     |                             |                                                     | MRPL13            |
|                                                     |                             |                                                     | C14orf142         |
|                                                     |                             |                                                     | RPL9P25           |
|                                                     |                             |                                                     | TSPAN3            |
|                                                     |                             |                                                     | MRPL46            |
|                                                     |                             |                                                     | MAST3             |
|                                                     |                             |                                                     | COX6B1            |
|                                                     |                             |                                                     | MRPS12            |
|                                                     |                             |                                                     | GPCPD1            |
|                                                     |                             |                                                     | CHD6              |
|                                                     |                             |                                                     | NDUFA6            |
|                                                     |                             |                                                     | BTK               |
|                                                     |                             |                                                     | MTMFR             |
|                                                     |                             |                                                     | DDI2              |
|                                                     |                             |                                                     | SYF2              |
|                                                     |                             |                                                     | CSMD2             |
|                                                     |                             |                                                     | SZT2              |
|                                                     |                             |                                                     | PPP2R5A           |
|                                                     |                             |                                                     | CICP13            |
|                                                     |                             |                                                     | ADCY3             |
|                                                     |                             |                                                     | OTOF              |
|                                                     |                             |                                                     | SGPP2             |
|                                                     |                             |                                                     | TRIP12            |
|                                                     |                             |                                                     | MYRIP             |
|                                                     |                             |                                                     | ZNF621            |
|                                                     |                             |                                                     | RP11              |
|                                                     |                             |                                                     | CYP2U1            |
|                                                     |                             |                                                     | SLC25A4           |
|                                                     |                             |                                                     | MCCC2             |
|                                                     |                             |                                                     | HMGXB3            |
|                                                     |                             |                                                     | LARP1             |
|                                                     |                             |                                                     | ID4               |
|                                                     |                             |                                                     | E2F3              |
|                                                     |                             |                                                     | SKIV2L            |
|                                                     |                             |                                                     | XPO5              |
|                                                     |                             |                                                     | MTHFD1L           |
|                                                     |                             |                                                     | FBXL18            |
|                                                     |                             |                                                     | MEOX2             |
|                                                     |                             |                                                     | CLIP2             |
|                                                     |                             |                                                     | GNG11             |
|                                                     |                             |                                                     | DPAGT1            |
|                                                     |                             |                                                     | IARS              |
|                                                     |                             |                                                     | KIAA0368          |
|                                                     |                             |                                                     | PCBD1             |
|                                                     |                             |                                                     | RP13              |
|                                                     |                             |                                                     | C10orf116         |
|                                                     |                             |                                                     | DIXDC1            |
|                                                     |                             |                                                     | KCNJ1             |
|                                                     |                             |                                                     | CD9               |
|                                                     |                             |                                                     | CLEC7A            |
|                                                     |                             |                                                     | NEU3              |
|                                                     |                             |                                                     | EP400             |
|                                                     |                             |                                                     | CRYL1             |
|                                                     |                             |                                                     | RNF31             |
|                                                     |                             |                                                     | AKAP5             |
|                                                     |                             |                                                     | EVL               |
|                                                     |                             |                                                     | USP7              |
|                                                     |                             |                                                     | SLC7A6            |
|                                                     |                             |                                                     | CIRH1A            |
|                                                     |                             |                                                     | ADAT1             |
|                                                     |                             |                                                     | IRX5              |
|                                                     |                             |                                                     | ACACA             |
|                                                     |                             |                                                     | PSME3             |
|                                                     |                             |                                                     | EFTUD2            |
|                                                     |                             |                                                     | PPM1D             |
|                                                     |                             |                                                     | TLK2              |
|                                                     |                             |                                                     | GAS2L2            |
|                                                     |                             |                                                     | CDK5R1            |
|                                                     |                             |                                                     | ILF3              |
|                                                     |                             |                                                     | GCDH              |
|                                                     |                             |                                                     | TRMT1             |
|                                                     |                             |                                                     | DPY19L3           |
|                                                     |                             |                                                     | MLL4              |

Stable4\_20PerPair

C19orf55 MEGF8 SIGLEC10 NLRP12 ZNF587 MAVS PAX1 APCDD1L GART

PEX26 FAM156B TCEAL7

GOBPID Pvalue OddsRatio ExpCount Count Size Term

GO:0006732 6.17803174840816e-07 7.82166918049271 1.61082278043042

11 206 coenzyme metabolic process

GO:0051186 3.37181934434477e-06 6.50008379420144 1.91578437478375

11 245 cofactor metabolic process

Tissue: Muscle\_skeletal=>Skin\_sun\_Exposed\_Lower\_leg Type: asymmetric

SourceGene: PROCR(ENSG00000101000.3)

TargetGeneSet: SKI ICMT ZBTB48 PGD PEX14 FBLIM1 RP11 SEPN1 RP1

EIF2C1 INSL3 CTPS MUTYH RP4 ALX3 CTTNBP2NL MAN1A2 CDC42SE1

CHTOP SNORA58 SHC1 ASH1L ARHGEF11 UCK2 MPZL1 ABL2 ATP2B4

TP53BP2 GALNT2 ATAD2B ADCY3 ASXL2 GPR113 SLC5A6 CAD YPEL5 ASB3

AFTPH TEX261 UGGT1 TMEM163 ACVR2A FMNL2 MTX2 CWC22 PIKFYVE RNF25

SGPP2 COL4A4 HDAC4 ARL8B TBC1D5 HIGD1A CCDC12 PRKAR2A ZNF654 CLDND1

KIAA2018 NCK1 PIK3CB UBQLN4P1 GPR87 BCL6 HES1 LETM1

ZBTB49 MRFAP1L1 TBC1D14 PCDH7 TEC CHIC2 GSX2 CLOCK RASGEF1B

HELQ SGMS2 ANAPC10 LSM6 UBE2B ANKHD1 FBXO38 NDST1 LARP1 MAT2B

SLC2A3P1 NEURL1B CTB DUSP1 ARL10 NSD1 CANX ZKSCAN4 UHRF1BP1

DEFA6 FBXO9 PTP4A1 PHF3 MDN1 MCM9 CCDC28A PPIL4 FOXK1 ARL4A

CCT6P3 ZNF394 FAM200A C7orf59 EPHB4 PRKRIP1 DNAJB9 IMPDH1 KLHDC10 HIPK2 RHEB

GS1 KIAA1456 KCNU1 PRKDC ATP6V1H TMEM68 PTDSS1 POP1 PABPC1

TTC35 ST3GAL1 CTA EPPK1 RGP1 FAM120A GRIN3A SNX33 MIR181A2HG

NUP188 TOR1B WDR5 NACC2 KLF6 OTUD1 RAB18 C10orf25 ZFAND4

P4HA1 C10orf28 TAF5 DUSP5 PPP2R2D HRAS ZBED5 TUT1 CTSC

AMOTL1 C11orf63 SIAE SRPR ERC1 TULP3 CDKN1B ITPR2 FKBP11

TUBA1C TMBIM6 ACVR1B SARNP DDIT3 SLC25A3 EID3 C12orf76 UNC119B

RSRC2 RPL21 AKAP11 MYCBP2 IPO5 CHAMP1 RNF31 TSSK6 BNIP3P1 ARF6

CHMP4BP1 MED6 ANGEL1 ALKBH1 SPATA7 BTBD7 WARS TRAF3 CDC42BPB

HERC2 C15orf24 RNF111 CLK3 CTD UBN1 FAM86A NOMO2 SMG1 COG7

NFATC2IP KCTD13 PRSS8 ARMC5 CNOT1 CMTM4 CBF6 PSKH1 CDH1

GABARAPL2 TERF2IP MAP1LC3B ZNF778 GLOD4 C17orf48 TOM1L2

MYO15A USP22 NF1 LRRC37B RHOT1 NLE1 ACACA SOCS7 NR1D1 STAT3

PSME3 DUSP3 SPOP LRRC59 TOB1 MPO PPM1D TLK2 H3F3B EXOC7

JMJD6 SLC26A11 NPLOC4 TGIF1 TUBB6 DSG3 PMAIP1 TMX3 LMNB2 EEF2

XAB2 ZNF426 PIN1 ZNF627 ZNF563 DCAF15 AKAP8L ZFP36 DEDD2 MEGF8

PHLDB3 ZNF225 PPP1R37 PRKD2 ZNF616 ZNF766 CNOT3 ZNF587 CENPB PROCR

DNTTIP1 VAPB C20orf151 C20orf20 TMEM50B GART ATP6V1E1 NF2

SREBF2 CDKL5 SMC1A HUWE1 MSN PHKA1 TTC3P1 EIF4A1P10 PSMD10

GOBPID Pvalue OddsRatio ExpCount Count Size Term

Tissue: Muscle\_skeletal=>Skin\_sun\_Exposed\_Lower\_leg Type: cluster

SourceGene: PROCR(ENSG00000101000.3)

TargetGeneSet: SKI ICMT ZBTB48 PGD PEX14 FBLIM1 RP11 SEPN1 RP1

EIF2C1 INSL3 CTPS MUTYH RP4 ALX3 CTTNBP2NL MAN1A2 CDC42SE1

CHTOP SNORA58 SHC1 ASH1L ARHGEF11 UCK2 MPZL1 ABL2 ATP2B4

TP53BP2 GALNT2 ATAD2B ADCY3 ASXL2 GPR113 SLC5A6 CAD YPEL5 ASB3

AFTPH TEX261 UGGT1 TMEM163 ACVR2A FMNL2 MTX2 CWC22 PIKFYVE RNF25

SGPP2 COL4A4 HDAC4 ARL8B TBC1D5 HIGD1A CCDC12 PRKAR2A ZNF654 CLDND1

KIAA2018 NCK1 PIK3CB UBQLN4P1 GPR87 BCL6 HES1 LETM1

ZBTB49 MRFAP1L1 TBC1D14 PCDH7 TEC CHIC2 GSX2 CLOCK RASGEF1B

HELQ SGMS2 ANAPC10 LSM6 UBE2B ANKHD1 FBXO38 NDST1 LARP1 MAT2B

SLC2A3P1 NEURL1B CTB DUSP1 ARL10 NSD1 CANX ZKSCAN4 UHRF1BP1

DEFA6 FBXO9 PTP4A1 PHF3 MDN1 MCM9 CCDC28A PPIL4 FOXK1 ARL4A

CCT6P3 ZNF394 FAM200A C7orf59 EPHB4 PRKRIP1 DNAJB9 IMPDH1 KLHDC10 HIPK2 RHEB

GS1 KIAA1456 KCNU1 PRKDC ATP6V1H TMEM68 PTDSS1 POP1 PABPC1

TTC35 ST3GAL1 CTA EPPK1 RGP1 FAM120A GRIN3A SNX33 MIR181A2HG

NUP188 TOR1B WDR5 NACC2 KLF6 OTUD1 RAB18 C10orf25 ZFAND4

P4HA1 C10orf28 TAF5 DUSP5 PPP2R2D HRAS ZBED5 TUT1 CTSC

AMOTL1 C11orf63 SIAE SRPR ERC1 TULP3 CDKN1B ITPR2 FKBP11

TUBA1C TMBIM6 ACVR1B SARNP DDIT3 SLC25A3 EID3 C12orf76 UNC119B

RSRC2 RPL21 AKAP11 MYCBP2 IPO5 CHAMP1 RNF31 TSSK6 BNIP3P1 ARF6

CHMP4BP1 MED6 ANGEL1 ALKBH1 SPATA7 BTBD7 WARS TRAF3 CDC42BPB

HERC2 C15orf24 RNF111 CLK3 CTD UBN1 FAM86A NOMO2 SMG1 COG7

Stable4\_20PerPair

|                                                                    |           |            |                      |                                             |                  |                    |           |                    |          |      |
|--------------------------------------------------------------------|-----------|------------|----------------------|---------------------------------------------|------------------|--------------------|-----------|--------------------|----------|------|
| NFATC2IP                                                           | KCTD13    | PRSS8      | ARMC5                | CNOT1                                       | CMTM4            | CBFB               | PSKH1     | CDH1               |          |      |
| GABARAPL2                                                          | TERF2IP   | MAP1LC3B   |                      | ZNF778                                      | GLOD4            | C17orf48           |           | TOM1L2             |          |      |
| MYO15A                                                             | USP22     | NF1        | LRRRC37B             | RHOT1                                       | NLE1             | ACACA              | SOCS7     | NR1D1              | STAT3    |      |
| PSME3                                                              | DUSP3     | SPOP       | LRRRC59              | TOB1                                        | MPO              | PPM1D              | TLK2      | H3F3B              | EXOC7    |      |
| JMJD6                                                              | SLC26A11  |            | NPLOC4               | TGIF1                                       | TUBB6            | DSG3               | PMAIP1    | TMX3               | LMNB2    | EEF2 |
| XAB2                                                               | ZNF426    | PIN1       | ZNF627               | ZNF563                                      | DCAF15           | AKAP8L             | ZFP36     | DEDD2              | MEGF8    |      |
| PHLDB3                                                             | ZNF225    | PPP1R37    | PRKD2                | ZNF616                                      | ZNF766           | CNOT3              | ZNF587    | CENPB              | PROCR    |      |
| DNTTIP1                                                            | VAPB      | C20orf151  |                      | C20orf20                                    |                  | TMEM50B            | GART      | ATP6V1E1           |          | NF2  |
| SREBF2                                                             | CDKL5     | SMC1A      | HUWE1                | MSN                                         | PHKA1            | TTC3P1             | EIF4A1P10 |                    | PSMD10   |      |
| GOBPID                                                             | Pvalue    | OddsRatio  |                      | ExpCount                                    |                  | Count              | Size      | Term               |          |      |
| Tissue: Muscle_skeletal=>Skin_Sun_Exposed_Lower_leg                |           |            |                      |                                             |                  |                    | Type:     | asymmetric         |          |      |
| SourceGene: RBPJL(ENSG00000124232.6)                               |           |            |                      |                                             |                  |                    |           |                    |          |      |
| TargetGeneSet: CELA2A CELA3B CELA3A REG1B REG1A HIST1H2BL CLPS CGA |           |            |                      |                                             |                  |                    |           |                    |          |      |
| CPA2                                                               | CPA1      | PRSS1      | PRSS3P1              | PNLIP                                       | PNLIPRP1         | PNLIPRP2           |           | RPL29P25           |          |      |
| PLA2G1B                                                            | GP2       | MT1H       | CTRB2                | CTRB1                                       |                  |                    |           |                    |          |      |
| GOBPID                                                             | Pvalue    | OddsRatio  |                      | ExpCount                                    |                  | Count              | Size      | Term               |          |      |
| GO:0007586                                                         | 8         | 109        | 5.69496585169008e-13 | digestion                                   | 103.1935         | 19351935           |           | 0.14331188153069   |          |      |
| GO:0044241                                                         | 8         | 109        | 2.88633145415972e-09 | lipid digestion                             | 349.6            | 0.0197218185592693 |           | 4                  | 15       |      |
| GO:0022617                                                         | 8         | 109        | 1.33863255514118e-05 | extracellular matrix disassembly            | 81.8125          | 0.0473323645422462 |           | 3                  | 36       |      |
| Tissue: Muscle_skeletal=>Skin_Sun_Exposed_Lower_leg                |           |            |                      |                                             |                  |                    | Type:     | cluster            |          |      |
| SourceGene: RP11-439E19.1(ENSG00000225300.1)                       |           |            |                      |                                             |                  |                    |           |                    |          |      |
| TargetGeneSet: RP11 FOXE1 C4BPAP2 REL FAM126B CFLAR GPBAR1 POC1A   |           |            |                      |                                             |                  |                    |           |                    |          |      |
| ITGB5-AS1                                                          | STAG1     | ECT2       | CRYGS                | RAC1P2                                      | LNK1-AS1         |                    | CCNA2     | FAM160A1           |          |      |
| KIFC1                                                              | PRKAR1B   | ANLN       | MIR671               | XKR6                                        | EXOSC3           | TCEB2P4            | AGAP7     | AFAP1L2            | GVINP1   |      |
| INCENP                                                             | THSD1P1   | MYCBP2-AS2 |                      | BUB1B                                       | UBE2Q2           | C15orf42           |           | PRC1               | NPIP     |      |
| HEXIM2                                                             | FAM108A5P | GSTT2      |                      | FGD1                                        | KIF4A            | MED12              |           |                    |          |      |
| GOBPID                                                             | Pvalue    | OddsRatio  |                      | ExpCount                                    |                  | Count              | Size      | Term               |          |      |
| GO:0051301                                                         | 8         | 452        | 4.07559802103047e-07 | cell division                               | 15.74662         | 16216216           |           | 0.750674693792817  |          |      |
| GO:0000910                                                         | 8         | 452        | 1.61460133934954e-05 | cytokinesis                                 | 31.86            | 0.156113763753373  |           | 4                  | 94       |      |
| GO:0000280                                                         | 6         | 350        | 1.79929748081699e-05 | nuclear division                            | 13.6463178294574 |                    |           | 0.581274652273199  |          |      |
| GO:0007067                                                         | 6         | 350        | 1.79929748081699e-05 | mitosis                                     | 13.6463178294574 |                    |           | 0.581274652273199  |          |      |
| Tissue: Skin_Sun_Exposed_Lower_leg=>Muscle_skeletal                |           |            |                      |                                             |                  |                    | Type:     | asymmetric         |          |      |
| SourceGene: RPL32P29(ENSG00000244270.1)                            |           |            |                      |                                             |                  |                    |           |                    |          |      |
| TargetGeneSet: SRM PKP1 QARS RP11 WDR43 POLR1A SS18L2 LETM1 GUF1   |           |            |                      |                                             |                  |                    |           |                    |          |      |
| SCFD2                                                              | SNRNP48   | RP1        | AIMP2                | TRGV4                                       | GLIS3            | TRUB2              | PDCD11    | DUSP5              | CCDC59   |      |
| ANAPC5                                                             | WARS      | SAT2       | ELAC2                | FARSA                                       | PSMF1            | ATRN               | RAB22A    | RRP1               |          |      |
| GOBPID                                                             | Pvalue    | OddsRatio  |                      | ExpCount                                    |                  | Count              | Size      | Term               |          |      |
| GO:0034660                                                         | 8         | 285        | 1.67741032307719e-08 | ncRNA metabolic process                     | 24.0373752389042 |                    |           | 0.493045463981731  |          |      |
| GO:0006399                                                         | 6         | 125        | 5.74670433869465e-08 | tRNA metabolic process                      | 37.9663865546218 |                    |           | 0.216248010518303  |          |      |
| GO:0006418                                                         | 4         | 48         | 1.2875089575768e-06  | tRNA aminoacylation for protein translation | 62.2597402597403 |                    |           | 0.0830392360390284 |          |      |
| GO:0043038                                                         | 51        |            | 1.64778958528933e-06 | amino acid activation                       | 58.273556231003  | 0.0882291882914677 |           | 4                  |          |      |
| GO:0043039                                                         | 51        |            | 1.64778958528933e-06 | tRNA aminoacylation                         | 58.273556231003  | 0.0882291882914677 |           | 4                  |          |      |
| Tissue: Muscle_skeletal=>Skin_Sun_Exposed_Lower_leg                |           |            |                      |                                             |                  |                    | Type:     | cluster            |          |      |
| SourceGene: SEPT10P1(ENSG00000253541.1)                            |           |            |                      |                                             |                  |                    |           |                    |          |      |
| TargetGeneSet: RPS8 IPP HBXIP BRP44 ACP1 ERLEC1 REL SENP2          |           |            |                      |                                             |                  |                    |           |                    |          |      |
| CXCR2                                                              | THOC7     | PCNP       | RP11                 | PARL                                        | RPS3A            | ZDHC11             | VTA1      | BRP44L             | RPS3AP26 |      |
| ZNF277                                                             | CTD       | DCTN6      | PAF1                 | RPS6                                        | RP13             | ATP6V1G1           |           | CUL2               | ANAPC16  |      |
| FAM204A                                                            | MUC5AC    | TMPRSS5    | HELB                 | ARL1                                        | GNP3             | GTF3A              | MEG8      | RPS3AP6            | RPL26    |      |
| RPL17                                                              | ARX       | VBP1       |                      |                                             |                  |                    |           |                    |          |      |
| GOBPID                                                             | Pvalue    | OddsRatio  |                      | ExpCount                                    |                  | Count              | Size      | Term               |          |      |
| GO:0022415                                                         | 8         |            | 8.04580785927588e-07 |                                             | 17.0434782608696 |                    |           | 0.539755034253685  |          |      |

STable4\_20PerPair

|            |     |                                                                     |                  |                  |          |         |          |                    |           |         |        |
|------------|-----|---------------------------------------------------------------------|------------------|------------------|----------|---------|----------|--------------------|-----------|---------|--------|
| 7          | 260 | viral reproductive process                                          |                  |                  |          |         |          |                    |           |         |        |
| GO:0006415 |     | 1.11526350705577e-06                                                | 33.3372093023256 |                  |          |         |          | 0.18891426198879   |           |         |        |
| 5          | 91  | translational termination                                           |                  |                  |          |         |          |                    |           |         |        |
| GO:0006414 |     | 2.26931234975104e-06                                                | 28.642           | 0.21797799460245 |          |         | 5        |                    | 105       |         |        |
|            |     | translational elongation                                            |                  |                  |          |         |          |                    |           |         |        |
| GO:0006614 |     | 2.26931234975104e-06                                                | 28.642           | 0.21797799460245 |          |         | 5        |                    | 105       |         |        |
|            |     | SRP-dependent cotranslational protein targeting to membrane         |                  |                  |          |         |          |                    |           |         |        |
| GO:0006613 |     | 2.37821394029656e-06                                                | 28.3564356435644 |                  |          |         |          | 0.220053975503425  |           |         |        |
| 5          | 106 | cotranslational protein targeting to membrane                       |                  |                  |          |         |          |                    |           |         |        |
| GO:0045047 |     | 2.37821394029656e-06                                                | 28.3564356435644 |                  |          |         |          | 0.220053975503425  |           |         |        |
| 5          | 106 | protein targeting to ER                                             |                  |                  |          |         |          |                    |           |         |        |
| GO:0072599 |     | 2.37821394029656e-06                                                | 28.3564356435644 |                  |          |         |          | 0.220053975503425  |           |         |        |
| 5          | 106 | establishment of protein localization to endoplasmic reticulum      |                  |                  |          |         |          |                    |           |         |        |
| GO:0072594 |     | 3.29101373818799e-06                                                | 17.9583333333333 |                  |          |         |          | 0.423500103799045  |           |         |        |
| 6          | 204 | establishment of protein localization to organelle                  |                  |                  |          |         |          |                    |           |         |        |
| GO:0070972 |     | 4.03532583692599e-06                                                | 25.3238938053097 |                  |          |         |          | 0.244965746315134  |           |         |        |
| 5          | 118 | protein localization to endoplasmic reticulum                       |                  |                  |          |         |          |                    |           |         |        |
| GO:0000184 |     | 4.20622731218036e-06                                                | 25.1             | 0.24704172721611 |          |         | 5        |                    | 119       |         |        |
|            |     | nuclear-transcribed mRNA catabolic process, nonsense-mediated decay |                  |                  |          |         |          |                    |           |         |        |
| GO:0019058 |     | 6.73288848653153e-06                                                | 15.7733333333333 |                  |          |         |          | 0.479551588125389  |           |         |        |
| 6          | 231 | viral infectious cycle                                              |                  |                  |          |         |          |                    |           |         |        |
| GO:0019080 |     | 1.34541121326142e-05                                                | 19.5547945205479 |                  |          |         |          | 0.313473116047332  |           |         |        |
| 5          | 151 | viral genome expression                                             |                  |                  |          |         |          |                    |           |         |        |
| GO:0019083 |     | 1.34541121326142e-05                                                | 19.5547945205479 |                  |          |         |          | 0.313473116047332  |           |         |        |
| 5          | 151 | viral transcription                                                 |                  |                  |          |         |          |                    |           |         |        |
| GO:0006413 |     | 1.38916231216778e-05                                                | 19.4204081632653 |                  |          |         |          | 0.315549096948308  |           |         |        |
| 5          | 152 | translational initiation                                            |                  |                  |          |         |          |                    |           |         |        |
| GO:0006612 |     | 1.43401731253634e-05                                                | 19.2878378378378 |                  |          |         |          | 0.317625077849284  |           |         |        |
| 5          | 153 | protein targeting to membrane                                       |                  |                  |          |         |          |                    |           |         |        |
| GO:0043624 |     | 1.43401731253634e-05                                                | 19.2878378378378 |                  |          |         |          | 0.317625077849284  |           |         |        |
| 5          | 153 | cellular protein complex disassembly                                |                  |                  |          |         |          |                    |           |         |        |
| GO:0043241 |     | 1.67554828197996e-05                                                | 18.6509803921569 |                  |          |         |          | 0.328004982354162  |           |         |        |
| 5          | 158 | protein complex disassembly                                         |                  |                  |          |         |          |                    |           |         |        |
|            |     | Tissue: Skin_Sun_Exposed_Lower_leg=>Muscle_Skeletal                 |                  |                  |          |         |          | Type: asymmetric   |           |         |        |
|            |     | SourceGene: SHROOM1(ENSG00000164403.9)                              |                  |                  |          |         |          |                    |           |         |        |
|            |     | TargetGeneSet: C1orf144                                             | CATSPER4         | SFN              | MACF1    | C1orf50 | KIAA0494 |                    |           |         |        |
|            |     | S100A4                                                              | TNFSF13B         | RP11             | CENPO    | DYSF    | GPR155   | ILKAP              | HSPBAP1   | TMEM108 |        |
|            |     | SCARNA7                                                             | WDR1             | MAP1B            | TXNDC15  | CTNNA1  | PCDHB14  | NDST1              | HIST1H2AG | CYP51A1 | BPGM   |
|            |     | NUP205                                                              | EXTL3            | SFRP1            | TTC35    | MYOF    | BNIP3    | 7SK                | SLC43A3   | TTC9C   | MYEOV  |
|            |     | SLC6A13                                                             | CDKN1B           | BNIP3P1          | HSPA2    | AHNAK2  | YPEL3    | CDH11              | NRN1L     | PFAS    | KRT16  |
|            |     | TUBB6                                                               | SMARCA4          | ZNF211           | JPH2     | COL18A1 | NF2      | RP3                | RNF128    | BGN     |        |
|            |     | GOBPID                                                              | Pvalue           | OddsRatio        | ExpCount | Count   | Size     | Term               |           |         |        |
|            |     | Tissue: whole_Blood=>Muscle_Skeletal                                |                  |                  |          |         |          | Type: asymmetric   |           |         |        |
|            |     | SourceGene: BCAN(ENSG00000132692.12)                                |                  |                  |          |         |          |                    |           |         |        |
|            |     | TargetGeneSet: GABRD                                                | RP3              | ERMN             | SCN2A    | MOBP    | CAMKV    | CTB                | CPLX2     |         |        |
|            |     | RPL7L1P3                                                            | TMEM130          | RP11             | VAT1     | NEFL    | DIRAS2   | GRIN1              | VPS26A    | INA     | BUB3   |
|            |     | CEND1                                                               | SLC1A2           | VAT1L            | RUNDC3A  | GFAP    | SYT4     | LILRB3             | SNAP25    | SLC12A5 | MYO18B |
|            |     | SEPT3                                                               | MLC1             |                  |          |         |          |                    |           |         |        |
|            |     | GOBPID                                                              | Pvalue           | OddsRatio        | ExpCount | Count   | Size     | Term               |           |         |        |
| GO:0006836 |     | 1.30506678399032e-06                                                | 33.0401662049861 |                  |          |         |          | 0.197633381772888  |           |         |        |
| 5          | 119 | neurotransmitter transport                                          |                  |                  |          |         |          |                    |           |         |        |
| GO:0001505 |     | 1.5371969226498e-06                                                 | 31.9112399643176 |                  |          |         |          | 0.20427652065601   |           |         |        |
| 5          | 123 | regulation of neurotransmitter levels                               |                  |                  |          |         |          |                    |           |         |        |
| GO:0001504 |     | 6.97436335720473e-06                                                | 102.907142857143 |                  |          |         |          | 0.0381980485779531 |           |         |        |
| 3          | 23  | neurotransmitter uptake                                             |                  |                  |          |         |          |                    |           |         |        |
| GO:0045104 |     | 1.02056064378552e-05                                                | 89.4658385093168 |                  |          |         |          | 0.0431804027402948 |           |         |        |
| 3          | 26  | intermediate filament cytoskeleton organization                     |                  |                  |          |         |          |                    |           |         |        |
| GO:0045103 |     | 1.14687963909998e-05                                                | 85.7321428571429 |                  |          |         |          | 0.0448411874610754 |           |         |        |
| 3          | 27  | intermediate filament-based process                                 |                  |                  |          |         |          |                    |           |         |        |
|            |     | Tissue: whole_Blood=>Muscle_Skeletal                                |                  |                  |          |         |          | Type: asymmetric   |           |         |        |
|            |     | SourceGene: C6orf48(ENSG00000204387.7)                              |                  |                  |          |         |          |                    |           |         |        |
|            |     | TargetGeneSet: C1orf159                                             | HECTD3           | CYP4A22          | RP11     | INADL   | DPYD     | ATP5F1             |           |         |        |
|            |     | HIST2H2BE                                                           | MTX1             | FAM189B          | ACBD6    | TSNAX   | CEP170   | TRMT61B            | C1D       | TXNDC9  |        |

Stable4\_20PerPair

|                                      |           |                      |           |                                                 |                   |           |          |                   |          |        |        |
|--------------------------------------|-----------|----------------------|-----------|-------------------------------------------------|-------------------|-----------|----------|-------------------|----------|--------|--------|
| NIF3L1                               | NDUFB3    | ERBB4                | ABCB6     | PRRT3-AS1                                       | SATB1             | NR1D2     | OXSM     | GRM2              |          |        |        |
| FAM208A                              | UBXN7-AS1 |                      | MAN2A1    | ARHGEF37                                        | MRPL22            | ARL10     | HIST1H1E |                   |          |        |        |
| MRPS18B                              | TAF11     | TEAD3                | C6orf226  |                                                 | RRP36             | DST       | C6orf162 | RTN4IP1           |          |        |        |
| KPNA5                                | HECA      | AIMP2                | NDUFA4    | PMPCB                                           | AGAP3             | DEFB1     | PCM1     | GDAP1             | ZNF704   |        |        |
| SMARCA2                              | MPDZ      | FANCG                | TESK1     | STXBP1                                          | FNBP1             | ARHGAP21  |          | SGMS1             | SUPV3L1  |        |        |
| RNF141                               | TEAD1     | MPPED2               | PEX16     | PHF21A                                          | PACS1             | RBM4B     | TEX12    | APOA4             | CBL RARG |        |        |
| AVIL                                 | TMEM19    | MRPS31               | MED4-AS1  |                                                 | TPP2              | PLEK2     | WDR25    | LPCAT4            | C15orf44 |        |        |
| ETFA                                 | MRPL46    | MRPL28               | PKD1      | NOMO2                                           | MAZ               | NOD2      | CIAPIN1  | RP1               | ZBTB4    |        |        |
| COX10                                | GIT1      | HSD17B1P1            |           | PYCR1                                           | NDUFV2            | PQLC1     | ABCA7    | UQCR11            | GIPC3    |        |        |
| PGPEP1                               | RELB      | PPP2R1A              | LINC00493 |                                                 | CDK5RAP1          |           | RP3      | NFATC2            | ATP9A    |        |        |
| FAM209B                              | ITSN1     | CTA                  | TMEM184B  |                                                 | CBX6              | SMARCA1   |          |                   |          |        |        |
| GOBPID                               | Pvalue    | OddsRatio            |           | ExpCount                                        | Count             | Size      |          | Term              |          |        |        |
| GO:0022904                           |           | 1.73404809983961e-06 |           | 14.0344101123596                                |                   |           |          | 0.577953082831638 |          |        |        |
| 7                                    | 96        |                      |           | respiratory electron transport chain            |                   |           |          |                   |          |        |        |
| GO:0022900                           |           | 1.58829521297848e-05 |           | 9.80895669291339                                |                   |           |          | 0.806726178119161 |          |        |        |
| 7                                    | 134       |                      |           | electron transport chain                        |                   |           |          |                   |          |        |        |
| Tissue: whole_Blood=>Muscle_skeletal |           |                      |           | Type: cluster                                   |                   |           |          |                   |          |        |        |
| SourceGene:                          |           |                      |           | C6orf48(ENSG00000204387.7)                      |                   |           |          |                   |          |        |        |
| TargetGeneSet:                       |           |                      |           | C1orf159                                        | HECTD3            | CYP4A22   | RP11     | INADL             | DPYD     | ATP5F1 |        |
| HIST2H2BE                            |           |                      |           | MTX1                                            | FAM189B           | ACBD6     | TSNAX    | CEP170            | TRMT61B  | C1D    | TXNDC9 |
| NIF3L1                               | NDUFB3    | ERBB4                | ABCB6     | PRRT3-AS1                                       | SATB1             | NR1D2     | OXSM     | GRM2              |          |        |        |
| FAM208A                              | UBXN7-AS1 |                      | MAN2A1    | ARHGEF37                                        | MRPL22            | ARL10     | HIST1H1E |                   |          |        |        |
| MRPS18B                              | TAF11     | TEAD3                | C6orf226  |                                                 | RRP36             | DST       | C6orf162 | RTN4IP1           |          |        |        |
| KPNA5                                | HECA      | AIMP2                | NDUFA4    | PMPCB                                           | AGAP3             | DEFB1     | PCM1     | GDAP1             | ZNF704   |        |        |
| SMARCA2                              | MPDZ      | FANCG                | TESK1     | STXBP1                                          | FNBP1             | ARHGAP21  |          | SGMS1             | SUPV3L1  |        |        |
| RNF141                               | TEAD1     | MPPED2               | PEX16     | PHF21A                                          | PACS1             | RBM4B     | TEX12    | APOA4             | CBL      | RARG   |        |
| AVIL                                 | TMEM19    | MRPS31               | MED4-AS1  |                                                 | TPP2              | PLEK2     | WDR25    | LPCAT4            | C15orf44 |        |        |
| ETFA                                 | MRPL46    | MRPL28               | PKD1      | NOMO2                                           | MAZ               | NOD2      | CIAPIN1  | RP1               | ZBTB4    |        |        |
| COX10                                | GIT1      | HSD17B1P1            |           | PYCR1                                           | NDUFV2            | PQLC1     | ABCA7    | UQCR11            | GIPC3    |        |        |
| PGPEP1                               | RELB      | PPP2R1A              | LINC00493 |                                                 | CDK5RAP1          |           | RP3      | NFATC2            | ATP9A    |        |        |
| FAM209B                              | ITSN1     | CTA                  | TMEM184B  |                                                 | CBX6              | SMARCA1   |          |                   |          |        |        |
| GOBPID                               | Pvalue    | OddsRatio            |           | ExpCount                                        | Count             | Size      |          | Term              |          |        |        |
| GO:0022904                           |           | 1.73404809983961e-06 |           | 14.0344101123596                                |                   |           |          | 0.577953082831638 |          |        |        |
| 7                                    | 96        |                      |           | respiratory electron transport chain            |                   |           |          |                   |          |        |        |
| GO:0022900                           |           | 1.58829521297848e-05 |           | 9.80895669291339                                |                   |           |          | 0.806726178119161 |          |        |        |
| 7                                    | 134       |                      |           | electron transport chain                        |                   |           |          |                   |          |        |        |
| Tissue: whole_Blood=>Muscle_skeletal |           |                      |           | Type: asymmetric                                |                   |           |          |                   |          |        |        |
| SourceGene:                          |           |                      |           | LINC00422(ENSG00000224429.1)                    |                   |           |          |                   |          |        |        |
| TargetGeneSet:                       |           |                      |           | KLHL21                                          | CAMTA1            | RP11      | UBE2T    | TMEM183A          | JMJD4    | RAB4A  |        |
| ROCK2                                | EML6      | MRPL30               | CALCRL    | TMEM42                                          | SACM1L            | PABPC1P10 |          | TMED11P           | C4orf26  |        |        |
| SKIV2L2                              | PTCD2     | RAD50                | GEMIN5    | FARS2                                           | C6orf62           | BYSL      | C6orf108 |                   | SNX14    |        |        |
| SPDYE2                               | BPGM      | RPL23AP53            |           | TNFRSF10B                                       |                   | USP20     | EXOSC2   | DDB1              | OVOL1    |        |        |
| LOH12CR1                             |           | METTL7A              | B4GALNT1  |                                                 | CCL14             | MAP1LC3B2 |          | RCBTB2            | NUBPL    |        |        |
| SOCS6                                | ZBTB1     | NEK9                 | DYNC1H1   | VPS13C                                          | MPI               | DNAJA3    | SBK1     | LONP2             | DYNC1LI2 |        |        |
| HPR                                  | ITGAE     | TP53                 | TOM1L2    | NLE1                                            | MAPT              | PNPO      | PHOSPHO1 |                   | BCAS3    |        |        |
| METTL4                               | SF3A2     | HMG20B               | BCL2L12   | LINC00085                                       |                   | PSMF1     | BID      | EFCAB6            | PNPLA4   |        |        |
| UTP14A                               | LINC00087 |                      | BRCC3     |                                                 |                   |           |          |                   |          |        |        |
| GOBPID                               | Pvalue    | OddsRatio            |           | ExpCount                                        | Count             | Size      |          | Term              |          |        |        |
| GO:0022613                           |           | 1.71308029564519e-06 |           | 11.3644560208375                                |                   |           |          | 0.840772264895163 |          |        |        |
| 8                                    | 225       |                      |           | ribonucleoprotein complex biogenesis            |                   |           |          |                   |          |        |        |
| GO:0071843                           |           | 2.68784995566008e-06 |           | 10.6651609260305                                |                   |           |          | 0.893086983599751 |          |        |        |
| 8                                    | 239       |                      |           | cellular component biogenesis at cellular level |                   |           |          |                   |          |        |        |
| Tissue: Muscle_skeletal=>whole_Blood |           |                      |           | Type: asymmetric                                |                   |           |          |                   |          |        |        |
| SourceGene:                          |           |                      |           | MTFR1(ENSG00000066855.10)                       |                   |           |          |                   |          |        |        |
| TargetGeneSet:                       |           |                      |           | RP11                                            | PCSK9             | CD101     | POLR3GL  | CD1A              | FAM110C  | PCYOX1 | WDR54  |
| IL18R1                               | ATRIP     | MAPKAPK3             |           | DUSP7                                           | B4GALT4           | PRLR      | ARG1     | LFNG              | GATS     | IRF5   |        |
| LGI3                                 | DRP2      | GPR26                | C9orf106  |                                                 | ARID5B            | MYOF      | ACP2     | ARRB1             | C11orf75 |        |        |
| SLC37A2                              | SMARCD1   | HVCN1                | IRG1      | FLVCR2                                          | ZG16B             | CBFA2T3   | RPL7AP64 |                   | ASGR1    |        |        |
| KCTD15                               | IL4I1     | LILRB1               | LILRB4    | ADRBK2                                          | PIK3IP1           | CYBB      |          |                   |          |        |        |
| GOBPID                               | Pvalue    | OddsRatio            |           | ExpCount                                        | Count             | Size      |          | Term              |          |        |        |
| GO:0031623                           |           | 9.38615227242075e-06 |           | 35.9125                                         | 0.134523562383226 |           |          | 4                 | 54       |        |        |
| receptor internalization             |           |                      |           |                                                 |                   |           |          |                   |          |        |        |
| GO:0006898                           |           | 1.41258191587134e-05 |           | 19.0535857104772                                |                   |           |          | 0.313888312227527 |          |        |        |

Stable4\_20PerPair

5 126 receptor-mediated endocytosis  
Tissue: whole\_Blood=>Muscle\_skeletal Type: asymmetric  
SourceGene: NCR1(ENSG00000189430.7)  
TargetGeneSet: FAM41C PLOD1 RP3 FOXO6 RP11 UBE2T SOCS5 EPHA4  
GAL3ST2 LAMB2 DCAF16 MAP1B ZNF277 GPR85 C8orf12 SPAG6 CSDA SOCS6  
RABEP2 HPR ARHGAP23 GNA13 HMG20B RGS19 ABCG1  
GOBPID Pvalue OddsRatio ExpCount Count Size Term  
GO:0031103 9.78813257602548e-06 90.9726315789474 0.0426268078333679  
3 28 axon regeneration  
GO:0031102 1.62213937516522e-05 75.7842105263158 0.0502387378036122  
3 33 neuron projection regeneration  
Tissue: whole\_Blood=>Muscle\_skeletal Type: asymmetric  
SourceGene: NEFM(ENSG00000104722.8)  
TargetGeneSet: VPS13D CACNA1A KCNJ9 VSNL1 CTNNA2 MOBP CAMKV SYNPR  
TAGLN3 SPP1 LSM6 GRIA2 CPLX2 CTA SFT2D1 TMEM130 RP11 NEFL  
STMN4 DIRAS2 GRIN1 VPS26A OPALIN PSD INA GPR123 SLC1A2 PRMT8 SCG5  
CKMT1B FBXL16 GFAP SYT4 SLC8A2 BCAT2 SNAP25 POLR3F SLC12A5 MLC1  
GOBPID Pvalue OddsRatio ExpCount Count Size Term  
GO:0006836 5.86618827844923e-06 23.2374918778428 0.263511175697184  
5 119 neurotransmitter transport  
GO:0001505 6.89686640537397e-06 22.4435028248588 0.272368694208013  
5 123 regulation of neurotransmitter levels  
GO:0048791 1.42319897105304e-05 961.2 0.00664313888312228 2 3  
calcium ion-dependent exocytosis of neurotransmitter  
Tissue: whole\_Blood=>Muscle\_skeletal Type: asymmetric  
SourceGene: OLAH(ENSG00000152463.10)  
TargetGeneSet: CORT PADI2 WNT4 AKR1A1 GADD45A TMEM206 JMJD4 EBF3 XDH  
SOCS5 UGP2 ELMOD3 OSBPL6 ICA1L ERBB4 EPHA4 EFHD1 ARL8B ZDHHC3  
TEX264 ANKDD1B CTB SNX14 AGPAT5 VPS13B ST3GAL1 SH3GLB2 VPS26A MICU1  
PANK1 SORBS1 SLC18A2 DDB1 IL18 RPUSD4 COPS7A METTL7A ABCC4 RP11 SBK1  
COX6A2 ABR TP53 TP53I13 NLE1 MAPT PNPO EXOC7 METTL4 SMAD7  
GOBPID Pvalue OddsRatio ExpCount Count Size Term  
GO:2000379 1.77754256999733e-06 56.8379446640316 0.0896823749221507  
4 27 positive regulation of reactive oxygen species metabolic process  
Tissue: Muscle\_skeletal=>whole\_Blood Type: asymmetric  
SourceGene: PGM5(ENSG00000154330.6)  
TargetGeneSet: RP11 IGKJ5 IGKC IGKJ1 IGKV4-1 IGKV1-9 IGKV3-20  
IGKV2-24 IGKV3D-20 ENOPH1 TRRAP GML GLDC RIN2 IGHG2  
IGHV2-5 MRPL38 IGLV5-45 IGLV2-23 IGLV3-16 IGLL5 IGLC3  
GOBPID Pvalue OddsRatio ExpCount Count Size Term  
GO:0006958 1.14392769649748e-12 327.159090909091 0.0415196180195142  
6 50 complement activation, classical pathway  
GO:0006956 4.8685606027542e-12 252.315789473684 0.0523147187045879  
6 63 complement activation  
GO:0002455 5.91430420577553e-12 243.728813559322 0.0539755034253685  
6 65 humoral immune response mediated by circulating immunoglobulin  
GO:0072376 2.49206776864283e-11 188.986842105263 0.0680921735520033  
6 82 protein activation cascade  
GO:0016064 1.59480560469431e-10 136.514285714286 0.0921735520033216  
6 111 immunoglobulin mediated immune response  
GO:0019724 1.87641587000686e-10 132.694444444444 0.0946647290844924  
6 114 B cell mediated immunity  
GO:0006959 2.8358439605752e-10 123.474137931034 0.101307867967615  
6 122 humoral immune response  
GO:0002449 1.89926442395287e-09 88.6832298136646 0.138675524185178  
6 167 lymphocyte mediated immunity  
GO:0002460 3.08500589580792e-09 81.5085714285714 0.150301017230641  
6 181 adaptive immune response based on somatic recombination of immune  
receptors built from immunoglobulin superfamily domains  
GO:0002250 5.29263894340719e-09 74.203125 0.164417687357276 6  
198 adaptive immune response  
GO:0002443 7.75190211419840e-09 69.4341463414634 0.17521278804235

Stable4\_20PerPair

6 211 leukocyte mediated immunity  
GO:0002253 6.21116986012747e-08 48.2798634812287 0.248287315756695  
6 299 activation of immune response  
GO:0050778 1.99278675894729e-07 39.3324022346369 0.302262819182064  
6 364 positive regulation of immune response  
GO:0002252 2.81797064242895e-07 36.9973684210526 0.32053145111065  
6 386 immune effector process  
Tissue: whole\_Blood=>Muscle\_skeletal Type: asymmetric  
SourceGene: PI3(ENSG00000124102.4)  
TargetGeneSet: RP11 RCC2 UBR4 WNT4 LYPLA2 MYOM3 RP3 CSMD2  
MACF1 IPO13 TMEM53 AKR1A1 CYP4A22 PDZK1IP1-AS1 MIR761 WDR63 MTX1  
HAPLN2 HDGF SLC26A9 TSNAX SIPA1L2 C2orf43 XDH UGP2 CEP68 MYO7B GPD2  
OSBPL6 COL4A4 COL4A3 PDE6D ARL8B PRRT3 PRRT3-AS1 NR1D2 OXSM RP13  
FAM212A BZW1P2 WHSC1 EGF ANAPC10 PDGFC CKMT2 ANKRD32 SLC12A2 ARHGEF37  
MRPL22 TUBB JARID2 HIST1H1E FKBP5 TMEM217 CUL7 MUT BACH2 GJA1  
RNF217 PLAGL1 ELN LIMK1 MCM7 AGPAT5 FDFT1 IDO1 ZNF704 IMPA1  
ST3GAL1 ZFAT-AS1 OPLAH TESK1 AQP7P2 SEMA4D HSDL2 ASTN2 TRIM32  
USP6NL SGMS1 RHOBTB1 TSPAN15 PANK1 TCTN3 GALNTL4 TEAD1 PEX16 PACS1  
RPUSD4 CD9 GRASP SUOX TMCC3 GPR133 MRPS31 ABCC4 TEP1 C14orf135  
FLVCR2 FOXN3 TTC7B C14orf80 LPCAT4 FAM174B NOMO1 NOMO3 NOMO2 MAZ  
PRRT2 COX6A2 LDHD RNF166 CTD RP1 UBE2G1 USP6 SLC2A4 SHBG TP53  
ALDH3A1 KSR1 TCAP KRT13 ABCA8 KCTD2 SYNGR2 ARHGAP28 PMAIP1 BCL2  
ZNF516 ABCA7 KLF16 FAM108A1 TIMM44 CYP4F22 CRLF1 RELB BBC3  
SPHK2 TGM3 VSX1 NNAT B4GALT5 MIR133A2 TIMP3 KAL1 EGFL6  
MTMR1  
GOBPID Pvalue OddsRatio ExpCount Count Size Term  
GO:0046902 1.61334629839148e-06 66.3472222222222 0.0930039443637119  
4 12 regulation of mitochondrial membrane permeability  
Tissue: whole\_Blood=>Muscle\_skeletal Type: cluster  
SourceGene: PI3(ENSG00000124102.4)  
TargetGeneSet: RP11 RCC2 UBR4 WNT4 LYPLA2 MYOM3 RP3 CSMD2  
MACF1 IPO13 TMEM53 AKR1A1 CYP4A22 PDZK1IP1-AS1 MIR761 WDR63 MTX1  
HAPLN2 HDGF SLC26A9 TSNAX SIPA1L2 C2orf43 XDH UGP2 CEP68 MYO7B GPD2  
OSBPL6 COL4A4 COL4A3 PDE6D ARL8B PRRT3 PRRT3-AS1 NR1D2 OXSM RP13  
FAM212A BZW1P2 WHSC1 EGF ANAPC10 PDGFC CKMT2 ANKRD32 SLC12A2 ARHGEF37  
MRPL22 TUBB JARID2 HIST1H1E FKBP5 TMEM217 CUL7 MUT BACH2 GJA1  
RNF217 PLAGL1 ELN LIMK1 MCM7 AGPAT5 FDFT1 IDO1 ZNF704 IMPA1  
ST3GAL1 ZFAT-AS1 OPLAH TESK1 AQP7P2 SEMA4D HSDL2 ASTN2 TRIM32  
USP6NL SGMS1 RHOBTB1 TSPAN15 PANK1 TCTN3 GALNTL4 TEAD1 PEX16 PACS1  
RPUSD4 CD9 GRASP SUOX TMCC3 GPR133 MRPS31 ABCC4 TEP1 C14orf135  
FLVCR2 FOXN3 TTC7B C14orf80 LPCAT4 FAM174B NOMO1 NOMO3 NOMO2 MAZ  
PRRT2 COX6A2 LDHD RNF166 CTD RP1 UBE2G1 USP6 SLC2A4 SHBG TP53  
ALDH3A1 KSR1 TCAP KRT13 ABCA8 KCTD2 SYNGR2 ARHGAP28 PMAIP1 BCL2  
ZNF516 ABCA7 KLF16 FAM108A1 TIMM44 CYP4F22 CRLF1 RELB BBC3  
SPHK2 TGM3 VSX1 NNAT B4GALT5 MIR133A2 TIMP3 KAL1 EGFL6  
MTMR1  
GOBPID Pvalue OddsRatio ExpCount Count Size Term  
GO:0046902 1.61334629839148e-06 66.3472222222222 0.0930039443637119  
4 12 regulation of mitochondrial membrane permeability  
Tissue: whole\_Blood=>Muscle\_skeletal Type: asymmetric  
SourceGene: PTN(ENSG00000105894.7)  
TargetGeneSet: CACNA1A RP4 ERMN SLC16A14 SOWAHA CPLX2 TMEM130 RP11  
NEFL GRIN1 INA SLC1A2 SYT1 KLHDC1 RPL5P3 RUNDC3A ZNF615 TTYH1  
GOBPID Pvalue OddsRatio ExpCount Count Size Term  
GO:0060052 1.56486111333871e-05 524.836363636364 0.00629714206629299  
2 7 neurofilament cytoskeleton organization  
Tissue: Muscle\_skeletal=>whole\_Blood Type: asymmetric  
SourceGene: REM1(ENSG00000088320.3)  
TargetGeneSet: SYT12 PPP1R12B RP11 PRKCD RPN1 PAICS DAPP1  
RTN3P1 CDHR2 CANX OGFRL1 CDK6 PDIA4 RNF32 ANXA1 RPL12P8 COMTD1  
TRIM3 GDF3 ZNF592 STUB1 C16orf88 TP53 SCR2 MIS18A-AS1  
GOBPID Pvalue OddsRatio ExpCount Count Size Term  
GO:0090398 3.88690786963359e-06 128.660714285714 0.0317625077849284

Stable4\_20PerPair

3 27 cellular senescence  
Tissue: whole\_Blood=>Muscle\_skeletal Type: asymmetric  
SourceGene: RP11-184M15.1(ENSG00000248187.1)  
TargetGeneSet: RP3 ERI3 TAL1 GADD45A RD3 LPGAT1 RP11 ROCK2  
OXSR1 ANKRD23 CDCA7 EPHA4 FAM132B LAMB2 SLC41A3 DCUN1D1 BHMT HUS1B  
TCF21 ELM01 CA1 KDM4C FTH1P12 BICC1 METTL7A BRI3BP SOCS6 CHRNA7  
GCHFR DYX1C1-CCPG1 SOCS1 FBXL19 ABR NLE1 MED13 SLC25A19  
ARHGAP28 SOGA2 GALNT1 ELAVL1 BBC3 BMP2 BCR TOM1 CASK  
GOBPID Pvalue OddsRatio ExpCount Count Size Term  
GO:0048708 2.23270655358904e-06 53.0175115207373 0.0944571309943949  
4 39 astrocyte differentiation  
Tissue: Muscle\_skeletal=>whole\_Blood Type: asymmetric  
SourceGene: RP11-36C20.1(ENSG00000240376.1)  
TargetGeneSet: CELA2A CELA3B CELA3A LAMP3 MUC21 CPA2 CPA1 PRSS1  
PRSS3P2 PNLIP PNLIPRP2 TEX12 RP11 SNHG9 KREMEN2 CTRB2 POLR2A SYCN  
OTUD5 PIN4  
GOBPID Pvalue OddsRatio ExpCount Count Size Term  
GO:0007586 1.28159346036606e-07 57.411858974359 0.128226420316933 5  
109 digestion  
Tissue: Muscle\_skeletal=>whole\_Blood Type: asymmetric  
SourceGene: RP11-543B16.1(ENSG00000234004.2)  
TargetGeneSet: RP11 MYT1L VSNL1 SCN2A DNER KIF1A SLC6A1 TAGLN3  
TECRL GRIA2 CTNND2 GABRB2 GABRA1 GABRG2 ODZ2 SNCB NRSN1 BEND6  
SNAP91 FABP7 MLLT4 STMN2 SH3GL2 DIRAS2 OPALIN BAD OPCML PRMT8  
FAIM2 CTD CKMT1B ASPHD1 CBLN1 NPTX1 SYT4 ST8SIA3 HSBP1L1 TUBB4A  
ELAVL3 UNC13A TCF15 SNAP25 GAL3ST1  
GOBPID Pvalue OddsRatio ExpCount Count Size Term  
GO:0051932 7.95299767355556e-07 70.5343137254902 0.0736281226212719  
4 28 synaptic transmission, GABAergic  
GO:0007270 3.19865250630032e-06 26.1591821832786 0.231402671095426  
5 88 neuron-neuron synaptic transmission  
GO:0007214 1.33208946821051e-05 82.2742857142857 0.0473323645422462  
3 18 gamma-aminobutyric acid signaling pathway  
Tissue: whole\_Blood=>Muscle\_skeletal Type: asymmetric  
SourceGene: SLC6A1(ENSG00000157103.6)  
TargetGeneSet: CACNA1A KCNJ9 CNTN2 RP11 MYT1L VSNL1 PTPRN ASB1 MOBP  
CAMKV CTD SYNPR TAGLN3 GUF1 GRIA2 GPM6A SOWAHA CTB CPLX2  
NRSN1 CTA MOG HCG17 7SK TMEM130 SDSL NEFL STMN2 DIRAS2  
GRIN1 VPS26A OPALIN INA SLC1A2 NRGN KIF5A SYT1 GABRB3 FBXL16  
LONP2 NEUROD2 RUNDC3A GFAP PNPO SYT4 SCARNA17 MAST1 PSMF1  
SNAP25 SLC12A5 CBX6 APOBEC3H MLC1 ZCCHC12  
GOBPID Pvalue OddsRatio ExpCount Count Size Term  
GO:0006836 1.30577705071748e-06 20.5142310452045 0.35409314234309  
6 119 neurotransmitter transport  
GO:0001505 1.58500294118228e-06 19.8073458073458 0.365995432842018  
6 123 regulation of neurotransmitter levels  
GO:0007269 5.34763290410581e-06 23.2732293697206 0.255899245726939  
5 86 neurotransmitter secretion  
Tissue: whole\_Blood=>Muscle\_skeletal Type: asymmetric  
SourceGene: SNAP91(ENSG00000065609.8)  
TargetGeneSet: VPS13D STMN1 CACNA1A CELF3 RP11 MYT1L VSNL1 MZT2A ERMN  
SCN2A PTPRN SLC16A14 ASB1 MOBP CTD TAGLN3 GUF1 GRIA2  
CPLX2 CTA MOG RP1 TMEM130 NEFL STMN2 GRIN1 VPS26A OPALIN INA  
NRAP CALY CEND1 SLC1A2 PRMT8 USP5 FAM186B SYT1 C14orf21  
KLHDC1 SYNDIG1L TMEM179 SCG5 RPL5P3 GABARAPL3 FBXL16 TOM1L2 BLMH  
NEUROD2 DUSP3 RUNDC3A GFAP C18orf34 SYT4 MAST1 TTYH1 SNAP25  
SLC12A5 POLR3H SEPT3 LDOC1L  
GOBPID Pvalue OddsRatio ExpCount Count Size Term  
GO:0006836 1.72131677403843e-06 19.4594962559564 0.370562590824164  
6 119 neurotransmitter transport  
GO:0001505 2.08841173625885e-06 18.7889546351085 0.383018476230019  
6 123 regulation of neurotransmitter levels  
GO:0007269 6.72428868269139e-06 22.1064814814815 0.267801536225867



Stable4\_20PerPair

| GOBPID                                                            | Pvalue                                         | OddsRatio                                             | ExpCount         | Count            | Size             | Term                |
|-------------------------------------------------------------------|------------------------------------------------|-------------------------------------------------------|------------------|------------------|------------------|---------------------|
| 5                                                                 | 86                                             | neurotransmitter secretion                            |                  |                  |                  |                     |
| Tissue: whole_Blood=>Muscle_skeletal Type: asymmetric             |                                                |                                                       |                  |                  |                  |                     |
| SourceGene: ZNF276(ENSG00000158805.7)                             |                                                |                                                       |                  |                  |                  |                     |
| TargetGeneSet: PAFAH2 CERS2 PYG02 SLAMF7 FCGR2A PTPRC PLEK MGAT5  |                                                |                                                       |                  |                  |                  |                     |
| TMEFF2 RP11 GJA1 GIMAP2 RNF141 SPI1 CD3E REP15 ARHGAP9 LCP1       |                                                |                                                       |                  |                  |                  |                     |
| LINC00441 RCBTB2 MCTP2 SPN C16orf54 CORO1A DUSP14 SOCS3           |                                                |                                                       |                  |                  |                  |                     |
| HMHA1 JAK3 TYROBP SERTAD3 BCL3 C19orf76 ZNF628 HCK ITGB2 RAC2     |                                                |                                                       |                  |                  |                  |                     |
| GO:0042102                                                        | 1.54330267381976e-07                           | 51.1831789023521                                      | 51.1831789023521 | 51.1831789023521 | 51.1831789023521 | 0.127880423500104   |
| 5                                                                 | 66                                             | positive regulation of T cell proliferation           |                  |                  |                  |                     |
| GO:0002252                                                        | 4.68992648981497e-07                           | 14.8624338624339                                      | 14.8624338624339 | 14.8624338624339 | 14.8624338624339 | 0.747906719258183   |
| 8                                                                 | 386                                            | immune effector process                               |                  |                  |                  |                     |
| GO:0050671                                                        | 1.01426167023644e-06                           | 34.2379359770664                                      | 34.2379359770664 | 34.2379359770664 | 34.2379359770664 | 0.186007888727424   |
| 5                                                                 | 96                                             | positive regulation of lymphocyte proliferation       |                  |                  |                  |                     |
| GO:0032946                                                        | 1.06796307774564e-06                           | 33.8634215500945                                      | 33.8634215500945 | 33.8634215500945 | 33.8634215500945 | 0.187945470901668   |
| 5                                                                 | 97                                             | positive regulation of mononuclear cell proliferation |                  |                  |                  |                     |
| GO:0046649                                                        | 1.11743181211452e-06                           | 13.1745882352941                                      | 13.1745882352941 | 13.1745882352941 | 13.1745882352941 | 0.838973081447651   |
| 8                                                                 | 433                                            | lymphocyte activation                                 |                  |                  |                  |                     |
| GO:0070665                                                        | 1.24265332334512e-06                           | 32.7871853546911                                      | 32.7871853546911 | 32.7871853546911 | 32.7871853546911 | 0.1937582174244 5   |
| 100                                                               | positive regulation of leukocyte proliferation |                                                       |                  |                  |                  |                     |
| GO:0042129                                                        | 1.30563684756582e-06                           | 32.4433876811594                                      | 32.4433876811594 | 32.4433876811594 | 32.4433876811594 | 0.195695799598644   |
| 5                                                                 | 101                                            | regulation of T cell proliferation                    |                  |                  |                  |                     |
| GO:0042110                                                        | 1.90053653913798e-06                           | 15.0758547008547                                      | 15.0758547008547 | 15.0758547008547 | 15.0758547008547 | 0.618088713583835   |
| 7                                                                 | 319                                            | T cell activation                                     |                  |                  |                  |                     |
| GO:0042098                                                        | 2.81950870580034e-06                           | 27.5298191612159                                      | 27.5298191612159 | 27.5298191612159 | 27.5298191612159 | 0.228634696560792   |
| 5                                                                 | 118                                            | T cell proliferation                                  |                  |                  |                  |                     |
| GO:0050865                                                        | 3.07598683139619e-06                           | 13.9751984126984                                      | 13.9751984126984 | 13.9751984126984 | 13.9751984126984 | 0.664590685765691   |
| 7                                                                 | 343                                            | regulation of cell activation                         |                  |                  |                  |                     |
| GO:0050867                                                        | 5.46715383363551e-06                           | 16.537296037296                                       | 16.537296037296  | 16.537296037296  | 16.537296037296  | 0.465019721818559 6 |
| 240                                                               | positive regulation of cell activation         |                                                       |                  |                  |                  |                     |
| GO:0050670                                                        | 7.48770937435757e-06                           | 22.3396934626212                                      | 22.3396934626212 | 22.3396934626212 | 22.3396934626212 | 0.279011833091136   |
| 5                                                                 | 144                                            | regulation of lymphocyte proliferation                |                  |                  |                  |                     |
| GO:0032944                                                        | 7.74480916145515e-06                           | 22.1785714285714                                      | 22.1785714285714 | 22.1785714285714 | 22.1785714285714 | 0.28094941526538    |
| 5                                                                 | 145                                            | regulation of mononuclear cell proliferation          |                  |                  |                  |                     |
| GO:0007229                                                        | 8.43117066891122e-06                           | 37.3932291666667                                      | 37.3932291666667 | 37.3932291666667 | 37.3932291666667 | 0.131755587848592   |
| 4                                                                 | 68                                             | integrin-mediated signaling pathway                   |                  |                  |                  |                     |
| GO:0070663                                                        | 9.13597438646053e-06                           | 21.4062968515742                                      | 21.4062968515742 | 21.4062968515742 | 21.4062968515742 | 0.2906373261366 5   |
| 150                                                               | regulation of leukocyte proliferation          |                                                       |                  |                  |                  |                     |
| GO:0030217                                                        | 1.10557334963855e-05                           | 20.5470774546502                                      | 20.5470774546502 | 20.5470774546502 | 20.5470774546502 | 0.302262819182064   |
| 5                                                                 | 156                                            | T cell differentiation                                |                  |                  |                  |                     |
| GO:0051249                                                        | 1.40216944209456e-05                           | 13.927797833935                                       | 13.927797833935  | 13.927797833935  | 13.927797833935  | 0.548335755311051 6 |
| 283                                                               | regulation of lymphocyte activation            |                                                       |                  |                  |                  |                     |
| GO:0050870                                                        | 1.72487052878309e-05                           | 18.6707700366684                                      | 18.6707700366684 | 18.6707700366684 | 18.6707700366684 | 0.331326551795723   |
| 5                                                                 | 171                                            | positive regulation of T cell activation              |                  |                  |                  |                     |
| GO:0046651                                                        | 1.77414845089915e-05                           | 18.5576672741474                                      | 18.5576672741474 | 18.5576672741474 | 18.5576672741474 | 0.333264133969967   |
| 5                                                                 | 172                                            | lymphocyte proliferation                              |                  |                  |                  |                     |
| GO:0032943                                                        | 1.87599746165927e-05                           | 18.3354772317983                                      | 18.3354772317983 | 18.3354772317983 | 18.3354772317983 | 0.337139298318455   |
| 5                                                                 | 174                                            | mononuclear cell proliferation                        |                  |                  |                  |                     |
| Tissue: Skin_Sun_Exposed_Lower_leg=>Nerve_Tibial Type: asymmetric |                                                |                                                       |                  |                  |                  |                     |
| SourceGene: C11orf51(ENSG00000110200.4)                           |                                                |                                                       |                  |                  |                  |                     |
| TargetGeneSet: CROCCP3 RPL11 TMEM57 NASP RPL5 TOMM20 RPL31 RPL15  |                                                |                                                       |                  |                  |                  |                     |
| RPL14 RPL24 RP11 ZNF718 GALNT7 FAM149A KLKB1 EEF1A1P19 CAMLG      |                                                |                                                       |                  |                  |                  |                     |
| RPS14 EEF1A1 BCKDHB MKRN1 SSPO RPS20 RPL30 EIF3H EEF1D SCRIB RPS6 |                                                |                                                       |                  |                  |                  |                     |
| TCEA1P1 CCL21 RPL12 LDB1 RPLP2 RPL27A FAU RPS25 TMEM136 ATP5G2    |                                                |                                                       |                  |                  |                  |                     |
| RPL41 RPL14P1 U8 RPL4 ALDH3A1 RPL23A RPL17 RPL19 KPNA2 MUM1       |                                                |                                                       |                  |                  |                  |                     |
| CEP89 PTOV1 EIF3L RANGAP1 TTLL12 RPS4X RPL10                      |                                                |                                                       |                  |                  |                  |                     |
| GOBPID                                                            | Pvalue                                         | OddsRatio                                             | ExpCount         | Count            | Size             | Term                |
| GO:0006414                                                        | 3.93523516651412e-40                           | 184.515297906602                                      | 184.515297906602 | 184.515297906602 | 184.515297906602 | 0.341498858210504   |
| 24                                                                | 105                                            | translational elongation                              |                  |                  |                  |                     |
| GO:0006415                                                        | 3.22333858429592e-37                           | 182.823188405797                                      | 182.823188405797 | 182.823188405797 | 182.823188405797 | 0.295965677115771   |
| 22                                                                | 91                                             | translational termination                             |                  |                  |                  |                     |
| GO:0006413                                                        | 6.67234534614046e-36                           | 116.380434782609                                      | 116.380434782609 | 116.380434782609 | 116.380434782609 | 0.494360251885683   |
| 24                                                                | 152                                            | translational initiation                              |                  |                  |                  |                     |

Stable4\_20PerPair

|                |                                                 |                                                                     |                    |    |
|----------------|-------------------------------------------------|---------------------------------------------------------------------|--------------------|----|
| GO:0006614     | 1.09240280307253e-35                            | 151.837108433735                                                    | 0.341498858210504  |    |
| 22             | 105                                             | SRP-dependent cotranslational protein targeting to membrane         |                    |    |
| GO:0006613     | 1.37621165623957e-35                            | 150.019047619048                                                    | 0.3447512282887    | 22 |
| 106            | 106                                             | cotranslational protein targeting to membrane                       |                    |    |
| GO:0045047     | 1.37621165623957e-35                            | 150.019047619048                                                    | 0.3447512282887    | 22 |
| 106            | 106                                             | protein targeting to ER                                             |                    |    |
| GO:0072599     | 1.37621165623957e-35                            | 150.019047619048                                                    | 0.3447512282887    | 22 |
| 106            | 106                                             | establishment of protein localization to endoplasmic reticulum      |                    |    |
| GO:0070972     | 1.84238264441215e-34                            | 131.156666666667                                                    | 0.383779669227043  |    |
| 22             | 118                                             | protein localization to endoplasmic reticulum                       |                    |    |
| GO:0000184     | 2.25647386992946e-34                            | 129.795463917526                                                    | 0.387032039305238  |    |
| 22             | 119                                             | nuclear-transcribed mRNA catabolic process, nonsense-mediated decay |                    |    |
| GO:0019080     | 6.40124123854654e-32                            | 97.3798449612403                                                    | 0.491107881807487  |    |
| 22             | 151                                             | viral genome expression                                             |                    |    |
| GO:0019083     | 6.40124123854654e-32                            | 97.3798449612403                                                    | 0.491107881807487  |    |
| 22             | 151                                             | viral transcription                                                 |                    |    |
| GO:0006612     | 8.71228281547153e-32                            | 95.8796946564886                                                    | 0.497612621963878  |    |
| 22             | 153                                             | protein targeting to membrane                                       |                    |    |
| GO:0043624     | 8.71228281547153e-32                            | 95.8796946564886                                                    | 0.497612621963878  |    |
| 22             | 153                                             | cellular protein complex disassembly                                |                    |    |
| GO:0043241     | 1.84769533836988e-31                            | 92.3223529411765                                                    | 0.513874472354854  |    |
| 22             | 158                                             | protein complex disassembly                                         |                    |    |
| GO:0000956     | 8.85202173874874e-31                            | 85.3480272108844                                                    | 0.549650543215002  |    |
| 22             | 169                                             | nuclear-transcribed mRNA catabolic process                          |                    |    |
| GO:0072594     | 9.40156975132788e-31                            | 75.3059392265193                                                    | 0.663483495951837  |    |
| 23             | 204                                             | establishment of protein localization to organelle                  |                    |    |
| GO:0034623     | 1.7402654742189e-30                             | 82.5115789473684                                                    | 0.565912393605979  |    |
| 22             | 174                                             | cellular macromolecular complex disassembly                         |                    |    |
| GO:0006402     | 2.94429546497264e-30                            | 80.3733333333333                                                    | 0.57892187391876   |    |
| 22             | 178                                             | mRNA catabolic process                                              |                    |    |
| GO:0032984     | 3.3512531851011e-30                             | 79.855796178344                                                     | 0.582174243996955  | 22 |
| 179            | 179                                             | macromolecular complex disassembly                                  |                    |    |
| GO:0006401     | 7.56836305532536e-29                            | 68.3851366120219                                                    | 0.666735866030033  |    |
| 22             | 205                                             | RNA catabolic process                                               |                    |    |
| GO:0019058     | 1.14795816151814e-27                            | 59.7684210526316                                                    | 0.75129748806311   |    |
| 22             | 231                                             | viral infectious cycle                                              |                    |    |
| GO:0071845     | 2.42024313434875e-27                            | 51.9299169859515                                                    | 0.92367310220746   |    |
| 23             | 284                                             | cellular component disassembly at cellular level                    |                    |    |
| GO:0022411     | 3.36061533517501e-27                            | 51.1316037735849                                                    | 0.936682582520241  |    |
| 23             | 288                                             | cellular component disassembly                                      |                    |    |
| GO:0022415     | 1.66022616153413e-26                            | 52.378487394958                                                     | 0.845616220330773  | 22 |
| 260            | 260                                             | viral reproductive process                                          |                    |    |
| GO:0006605     | 3.2150454592583e-25                             | 35.3183842883175                                                    | 1.54162341706456   |    |
| 25             | 474                                             | protein targeting                                                   |                    |    |
| GO:0033365     | 1.03305378704065e-23                            | 32.4314902682289                                                    | 1.53837104698637   |    |
| 24             | 473                                             | protein localization to organelle                                   |                    |    |
| GO:0016032     | 3.25821142747066e-21                            | 28.6666666666667                                                    | 1.46681890526607   |    |
| 22             | 451                                             | viral reproduction                                                  |                    |    |
| GO:0000028     | 6.40494922747351e-07                            | 327.295454545455                                                    | 0.0195142204691717 |    |
| 3              | 6                                               | ribosomal small subunit assembly                                    |                    |    |
| GO:0042273     | 6.94949201671952e-06                            | 109.05303030303                                                     | 0.0390284409383434 | 3  |
| 12             | 12                                              | ribosomal large subunit biogenesis                                  |                    |    |
| GO:0022613     | 7.48271332996681e-06                            | 11.3878440366972                                                    | 0.731783267593938  |    |
| 7              | 225                                             | ribonucleoprotein complex biogenesis                                |                    |    |
| GO:0042254     | 8.23103658715123e-06                            | 14.5942350332594                                                    | 0.484603141651097  |    |
| 6              | 149                                             | ribosome biogenesis                                                 |                    |    |
| GO:0071843     | 1.10960357636727e-05                            | 10.6900862068966                                                    | 0.777316448688672  |    |
| 7              | 239                                             | cellular component biogenesis at cellular level                     |                    |    |
| GO:0042255     | 1.75287177006372e-05                            | 75.4772727272727                                                    | 0.0520379212511245 |    |
| 3              | 16                                              | ribosome assembly                                                   |                    |    |
| Tissue:        | Skin_Sun_Exposed_Lower_leg=>Nerve_Tibial        | Type:                                                               | asymmetric         |    |
| SourceGene:    | CIB2(ENSG00000136425.8)                         |                                                                     |                    |    |
| TargetGeneSet: | RPL22 RPL11 RPS27 GAS5 ASTN1 UBC RPL31 MLPH XPC |                                                                     |                    |    |

Stable4\_20PerPair

| RPL14                                            | KPNA1         | RP11                 | PLD1     | RPL34            | RPS3A             | HOMER1                                                              | EIF4EBP3         | EFCAB9             |          |
|--------------------------------------------------|---------------|----------------------|----------|------------------|-------------------|---------------------------------------------------------------------|------------------|--------------------|----------|
| RPL10A                                           | VN1R42P       | RPS20                | RPL30    | RPL27A           | DDB2              | PITPNM1                                                             | RPS25            | NCKAP5L            | PFDN5    |
| RPL41                                            | NACA          | CYP27B1              | SSH1     | RPS3AP6          | SEC11A            | RPS15A                                                              | NFAT5            | RPL26              | C17orf48 |
| RPL23A                                           | RPL17         | RPL19                | WIZ      | UBA52            | FTL               | RPS4X                                                               | HAUS7            | RPL10              |          |
| GOBPID                                           | Pvalue        | OddsRatio            | ExpCount | Count            | Size              | Term                                                                |                  |                    |          |
| GO:0006614                                       |               | 3.93238183764693e-40 |          | 236.418220946915 |                   |                                                                     |                  | 0.2906373261366    | 23       |
| 105                                              | SRP-dependent |                      |          |                  |                   | cotranslational protein targeting to membrane                       |                  |                    |          |
| GO:0006613                                       |               | 5.01637705209728e-40 |          | 233.553508150248 |                   |                                                                     |                  | 0.293405300671234  |          |
| 23                                               | 106           |                      |          |                  |                   | cotranslational protein targeting to membrane                       |                  |                    |          |
| GO:0045047                                       |               | 5.01637705209728e-40 |          | 233.553508150248 |                   |                                                                     |                  | 0.293405300671234  |          |
| 23                                               | 106           |                      |          |                  |                   | protein targeting to ER                                             |                  |                    |          |
| GO:0072599                                       |               | 5.01637705209728e-40 |          | 233.553508150248 |                   |                                                                     |                  | 0.293405300671234  |          |
| 23                                               | 106           |                      |          |                  |                   | establishment of protein localization to endoplasmic reticulum      |                  |                    |          |
| GO:0006415                                       |               | 2.54414903770958e-39 |          | 254.045088566828 |                   |                                                                     |                  | 0.25188568265172   |          |
| 22                                               | 91            |                      |          |                  |                   | translational termination                                           |                  |                    |          |
| GO:0070972                                       |               | 7.72410679129691e-39 |          | 203.881114551084 |                   |                                                                     |                  | 0.326620995086845  |          |
| 23                                               | 118           |                      |          |                  |                   | protein localization to endoplasmic reticulum                       |                  |                    |          |
| GO:0006414                                       |               | 8.67876567754578e-38 |          | 210.987951807229 |                   |                                                                     |                  | 0.2906373261366    | 22       |
| 105                                              | translational |                      |          |                  |                   | elongation                                                          |                  |                    |          |
| GO:0000184                                       |               | 1.80445658011118e-36 |          | 180.359679266896 |                   |                                                                     |                  | 0.329388969621479  |          |
| 22                                               | 119           |                      |          |                  |                   | nuclear-transcribed mRNA catabolic process, nonsense-mediated decay |                  |                    |          |
| GO:0006413                                       |               | 4.31958891118867e-36 |          | 149.788417692658 |                   |                                                                     |                  | 0.420732129264411  |          |
| 23                                               | 152           |                      |          |                  |                   | translational initiation                                            |                  |                    |          |
| GO:0006612                                       |               | 5.07803517317897e-36 |          | 148.625791855204 |                   |                                                                     |                  | 0.423500103799045  |          |
| 23                                               | 153           |                      |          |                  |                   | protein targeting to membrane                                       |                  |                    |          |
| GO:0019080                                       |               | 5.19616739139964e-34 |          | 135.316106804479 |                   |                                                                     |                  | 0.417964154729776  |          |
| 22                                               | 151           |                      |          |                  |                   | viral genome expression                                             |                  |                    |          |
| GO:0019083                                       |               | 5.19616739139964e-34 |          | 135.316106804479 |                   |                                                                     |                  | 0.417964154729776  |          |
| 22                                               | 151           |                      |          |                  |                   | viral transcription                                                 |                  |                    |          |
| GO:0043624                                       |               | 7.07876921231269e-34 |          | 133.23155216285  | 0.423500103799045 |                                                                     |                  |                    | 22       |
| 153                                              | cellular      |                      |          |                  |                   | protein complex disassembly                                         |                  |                    |          |
| GO:0043241                                       |               | 1.50478167661709e-33 |          | 128.28839869281  | 0.437339976472216 |                                                                     |                  |                    | 22       |
| 158                                              | protein       |                      |          |                  |                   | complex disassembly                                                 |                  |                    |          |
| GO:0072594                                       |               | 5.6314287424571e-33  |          | 106.366590835229 |                   |                                                                     |                  | 0.564666805065393  |          |
| 23                                               | 204           |                      |          |                  |                   | establishment of protein localization to organelle                  |                  |                    |          |
| GO:0000956                                       |               | 7.24644259793017e-33 |          | 118.597127739985 |                   |                                                                     |                  | 0.467787696353194  |          |
| 22                                               | 169           |                      |          |                  |                   | nuclear-transcribed mRNA catabolic process                          |                  |                    |          |
| GO:0034623                                       |               | 1.42796062147389e-32 |          | 114.655701754386 |                   |                                                                     |                  | 0.481627569026365  |          |
| 22                                               | 174           |                      |          |                  |                   | cellular macromolecular complex disassembly                         |                  |                    |          |
| GO:0006402                                       |               | 2.42045501881131e-32 |          | 111.684472934473 |                   |                                                                     |                  | 0.492699467164902  |          |
| 22                                               | 178           |                      |          |                  |                   | mRNA catabolic process                                              |                  |                    |          |
| GO:0032984                                       |               | 2.75630086898174e-32 |          | 110.965322009908 |                   |                                                                     |                  | 0.495467441699536  |          |
| 22                                               | 179           |                      |          |                  |                   | macromolecular complex disassembly                                  |                  |                    |          |
| GO:0019058                                       |               | 1.1129298490132e-31  |          | 92.3837669683258 |                   |                                                                     |                  | 0.639402117500519  |          |
| 23                                               | 231           |                      |          |                  |                   | viral infectious cycle                                              |                  |                    |          |
| GO:0006401                                       |               | 6.30120187678486e-31 |          | 95.0261080752884 |                   |                                                                     |                  | 0.567434779600028  |          |
| 22                                               | 205           |                      |          |                  |                   | RNA catabolic process                                               |                  |                    |          |
| GO:0022415                                       |               | 1.86162517444779e-30 |          | 80.9138744105237 |                   |                                                                     |                  | 0.719673379004913  |          |
| 23                                               | 260           |                      |          |                  |                   | viral reproductive process                                          |                  |                    |          |
| GO:0071845                                       |               | 1.50548546374765e-29 |          | 73.3491097588461 |                   |                                                                     |                  | 0.786104767836136  |          |
| 23                                               | 284           |                      |          |                  |                   | cellular component disassembly at cellular level                    |                  |                    |          |
| GO:0022411                                       |               | 2.09439452941768e-29 |          | 72.2215316315205 |                   |                                                                     |                  | 0.797176665974673  |          |
| 23                                               | 288           |                      |          |                  |                   | cellular component disassembly                                      |                  |                    |          |
| GO:0006605                                       |               | 1.07853780536434e-27 |          | 51.826280623608  | 1.31201992941665  |                                                                     |                  |                    | 25       |
| 474                                              | protein       |                      |          |                  |                   | targeting                                                           |                  |                    |          |
| GO:0033365                                       |               | 4.97986219813e-26    |          | 46.6436525612472 |                   |                                                                     |                  | 1.30925195488202   |          |
| 24                                               | 473           |                      |          |                  |                   | protein localization to organelle                                   |                  |                    |          |
| GO:0016032                                       |               | 7.30060770849561e-25 |          | 44.2013468938977 |                   |                                                                     |                  | 1.24835651512006   |          |
| 23                                               | 451           |                      |          |                  |                   | viral reproduction                                                  |                  |                    |          |
| GO:0042273                                       |               | 4.24829873259561e-06 |          | 129.747747747748 |                   |                                                                     |                  | 0.0332156944156114 |          |
| 3                                                | 12            |                      |          |                  |                   | ribosomal large subunit biogenesis                                  |                  |                    |          |
| Tissue: Nerve_Tibial=>Skin_Sun_Exposed_Lower_leg |               |                      |          |                  |                   |                                                                     | Type: asymmetric |                    |          |
| SourceGene: EIF3M(ENSG00000149100.8)             |               |                      |          |                  |                   |                                                                     |                  |                    |          |

Stable4\_20PerPair

| TargetGeneSet: | LAMTOR2  | ACBD6     | GLT25D2              | KLHL12  | RP11             | ADCK3                                                               | NUP133            | TOMM20  | UBC     |
|----------------|----------|-----------|----------------------|---------|------------------|---------------------------------------------------------------------|-------------------|---------|---------|
| MZT2B          | WDR75    | GTF3C3    | CNPPD1               | TMEM111 | HDAC11           | FNDC3B                                                              | HAUS3             | LIAS    | NOA1    |
| NUP54          | ZNF622   | BTF3      | RPS14                | HNRNPC  | RPL10A           | C6orf130                                                            | PSMB1             | MRPS24  |         |
| BUD31          | MKRN1    | HOOK3     | C9orf123             | RPS6    | FAM95B1          | AKR1C1                                                              | MGEA5             | POLR2G  | FAU     |
| THYN1          | C12orf57 |           | PRKAG1               | PWP1    | SAP18            | C14orf183                                                           | SPTB              | C14orf2 |         |
| GCHFR          | LYSMD2   | ANP32A    | RPS2                 | RPS15A  | NUPR1            | BCKDK                                                               | GGNBP2            | FN3KRP  | ELP2    |
| PRKCSH         | ZNF826P  | SNRPD2    | RPL13A               | RPS5    | NSFL1C           | CRYZL1                                                              | SAMM50            | EDA     | IL13RA2 |
| GOBPID         | Pvalue   | OddsRatio | ExpCount             | Count   | Size             | Term                                                                |                   |         |         |
| GO:0006612     | 11       | 153       | 1.28973883831421e-11 | 24      | 5356807511737    | protein targeting to membrane                                       | 0.592900145318663 |         |         |
| GO:0043241     | 11       | 158       | 1.8325166667218e-11  | 23      | 6928193499622    | protein complex disassembly                                         | 0.612275967061103 |         |         |
| GO:0006415     | 9        | 91        | 6.1771917725899e-11  | 33      | 4242345614946    | translational termination                                           | 0.352639955712407 |         |         |
| GO:0032984     | 11       | 179       | 7.10308950550242e-11 | 20      | 7006613756614    | macromolecular complex disassembly                                  | 0.693654418379351 |         |         |
| GO:0006414     | 9        | 105       | 2.27284005861797e-10 | 28      | 5219414893617    | translational elongation                                            | 0.406892256591239 |         |         |
| GO:0006614     | 9        | 105       | 2.27284005861797e-10 | 28      | 5219414893617    | SRP-dependent cotranslational protein targeting to membrane         | 0.406892256591239 |         |         |
| GO:0006613     | 9        | 106       | 2.47642470537799e-10 | 28      | 2259267383198    | cotranslational protein targeting to membrane                       | 0.410767420939727 |         |         |
| GO:0045047     | 9        | 106       | 2.47642470537799e-10 | 28      | 2259267383198    | protein targeting to ER                                             | 0.410767420939727 |         |         |
| GO:0072599     | 9        | 106       | 2.47642470537799e-10 | 28      | 2259267383198    | establishment of protein localization to endoplasmic reticulum      | 0.410767420939727 |         |         |
| GO:0019080     | 10       | 151       | 2.71259836378899e-10 | 21      | 9765649090348    | viral genome expression                                             | 0.585149816621687 |         |         |
| GO:0019083     | 10       | 151       | 2.71259836378899e-10 | 21      | 9765649090348    | viral transcription                                                 | 0.585149816621687 |         |         |
| GO:0072594     | 11       | 204       | 2.89516314673346e-10 | 17      | 9875647668394    | establishment of protein localization to organelle                  | 0.790533527091551 |         |         |
| GO:0043624     | 10       | 153       | 3.08861291364601e-10 | 21      | 6661599270295    | cellular protein complex disassembly                                | 0.592900145318663 |         |         |
| GO:0070972     | 9        | 118       | 6.50848000839002e-10 | 25      | 0974038649229    | protein localization to endoplasmic reticulum                       | 0.457269393121583 |         |         |
| GO:0000184     | 9        | 119       | 7.02029640361192e-10 | 24      | 8675048355899    | nuclear-transcribed mRNA catabolic process, nonsense-mediated decay | 0.461144557470071 |         |         |
| GO:0034623     | 10       | 174       | 1.0908891756791e-09  | 18      | 8639978791092    | cellular macromolecular complex disassembly                         | 0.674278596636911 |         |         |
| GO:0006605     | 14       | 474       | 2.26412594476969e-09 | 10      | 0978260869565    | protein targeting                                                   | 1.83682790118331  |         |         |
| GO:0006413     | 9        | 152       | 6.1746345430566e-09  | 19      | 0846600208302    | translational initiation                                            | 0.589024980970175 |         |         |
| GO:0022411     | 11       | 288       | 1.09352464497453e-08 | 12      | 4587244283995    | cellular component disassembly                                      | 1.11604733236454  |         |         |
| GO:0016032     | 13       | 451       | 1.24746289364511e-08 | 9       | 63369438249974   | viral reproduction                                                  | 1.74769912116809  |         |         |
| GO:0000956     | 9        | 169       | 1.56302678744595e-08 | 17      | 0365691489362    | nuclear-transcribed mRNA catabolic process                          | 0.654902774894471 |         |         |
| GO:0019058     | 10       | 231       | 1.67773738420351e-08 | 13      | 9425536100728    | viral infectious cycle                                              | 0.895162964500727 |         |         |
| GO:0033365     | 13       | 473       | 2.19498901115659e-08 | 9       | 15849342770475   | protein localization to organelle                                   | 1.83295273683482  |         |         |
| GO:0006402     | 9        | 178       | 2.45514522992741e-08 | 16      | 1190985773637    | mRNA catabolic process                                              | 0.689779254030863 |         |         |
| GO:0022415     |          |           | 5.14251305473823e-08 | 12.3    | 1.00754273060688 | viral reproductive process                                          | 10                | 260     |         |
| GO:0006401     | 205      |           | 8.30638180347452e-08 | 13      | 872231871472     | RNA catabolic process                                               | 0.794408691440039 | 9       |         |
| GO:0071845     | 10       | 284       | 1.17653160995401e-07 | 11      | 2035861631228    | cellular component disassembly at cellular level                    | 1.10054667497059  |         |         |

Tissue: Skin\_Sun\_Exposed\_Lower\_leg=>Nerve\_Tibial Type: asymmetric

Stable4\_20PerPair

| SourceGene:    | MMP27(ENSG00000137675.4) |                      |                  |                   |              |                                                                     |           |                   |        |
|----------------|--------------------------|----------------------|------------------|-------------------|--------------|---------------------------------------------------------------------|-----------|-------------------|--------|
| TargetGeneSet: | TMEM201                  | RPL11                | CDC42SE1         | CCT3              | RP11         | URB2                                                                | CDC42EP3  |                   |        |
| RTKN           | C2orf55                  | RPL31                | RFX8             | R3HDM1            | HOXD8        | RPL37A                                                              | OTOS      | RPL32             | CRTAP  |
| RPL14          | IFRD2                    | CCDC48               | GPR160           | PLD1              | EIF4G1       | RPL35A                                                              | LETM1     | SOD3              | UBA6   |
| RPL34          | CCT5                     | RPL37                | EPB41L4A         |                   | EPB41L4A-AS1 | CTD                                                                 | LYRM4     | HLA-C             |        |
| PAQR8          | CD109                    | ICA1                 | RPS20            | SCRIB             | LRRRC14      | KCNV2                                                               | RPS6      | QSOX2             | EGFL7  |
| SNHG7          | ABCA2                    | RPL13AP5             |                  | PTDSS2            | RPLP2        | RPS13                                                               | FAU       | CCL13             | C2CD3  |
| CAPRIN2        | KIF21A                   | FMNL3                | NCKAP5L          | MARS              | RPL14P1      | GPR137C                                                             | C14orf135 |                   | RPL3P4 |
| TP53BP1        | RPLP1                    | TMC7                 | U6               | RPL17             | RPL19        | ACLY                                                                | PRPSAP1   | RPL18             | RPS9   |
| RPS21          | NPTXR                    | PPARA                | PIM2             | NLGN3             | RPL10        | PLXNA3                                                              |           |                   |        |
| GOBPID         | Pvalue                   | OddsRatio            | ExpCount         | Count             | Size         | Term                                                                |           |                   |        |
| GO:0006415     | 21                       | 2.18531216577091e-32 | 113.068421052632 |                   |              | translational termination                                           |           | 0.371531381911286 |        |
| GO:0000184     | 22                       | 1.26188456293878e-31 | 87.6260796879354 |                   |              | nuclear-transcribed mRNA catabolic process, nonsense-mediated decay |           | 0.485848730191682 |        |
| GO:0006414     | 21                       | 6.09772356402699e-31 | 94.1315789473684 |                   |              | translational elongation                                            |           | 0.428690056051484 |        |
| GO:0006614     | 21                       | 6.09772356402699e-31 | 94.1315789473684 |                   |              | SRP-dependent cotranslational protein targeting to membrane         |           | 0.428690056051484 |        |
| GO:0006613     | 21                       | 7.58500679264764e-31 | 93.0176470588235 |                   |              | cotranslational protein targeting to membrane                       |           | 0.43277281849007  |        |
| GO:0045047     | 21                       | 7.58500679264764e-31 | 93.0176470588235 |                   |              | protein targeting to ER                                             |           | 0.43277281849007  |        |
| GO:0072599     | 21                       | 7.58500679264764e-31 | 93.0176470588235 |                   |              | establishment of protein localization to endoplasmic reticulum      |           | 0.43277281849007  |        |
| GO:0070972     | 21                       | 8.80646416025724e-30 | 81.4419424850787 |                   |              | protein localization to endoplasmic reticulum                       |           | 0.481765967753097 |        |
| GO:0006413     | 22                       | 4.06936847496523e-29 | 65.2316008316008 |                   |              | translational initiation                                            |           | 0.620579890665006 |        |
| GO:0000956     | 22                       | 4.75552145898171e-28 | 57.6190476190476 |                   |              | nuclear-transcribed mRNA catabolic process                          |           | 0.68998685212096  |        |
| GO:0006402     | 22                       | 1.57033952636964e-27 | 54.2605682605683 |                   |              | mRNA catabolic process                                              |           | 0.726731714068231 |        |
| GO:0019080     | 21                       | 2.21888062683604e-27 | 60.6279352226721 |                   |              | viral genome expression                                             |           | 0.61649712822642  |        |
| GO:0019083     | 21                       | 2.21888062683604e-27 | 60.6279352226721 |                   |              | viral transcription                                                 |           | 0.61649712822642  |        |
| GO:0006612     | 153                      | 2.9690674028572e-27  | 59.700956937799  | 0.624662653103591 |              | protein targeting to membrane                                       |           |                   | 21     |
| GO:0043624     | 153                      | 2.9690674028572e-27  | 59.700956937799  | 0.624662653103591 |              | cellular protein complex disassembly                                |           |                   | 21     |
| GO:0043241     | 21                       | 6.04079034146103e-27 | 57.5019208605455 |                   |              | protein complex disassembly                                         |           | 0.645076465296519 |        |
| GO:0006401     | 22                       | 3.9497866500228e-26  | 46.1671835770196 |                   |              | RNA catabolic process                                               |           | 0.836966299910041 |        |
| GO:0034623     | 21                       | 5.02452105141684e-26 | 51.4308565531476 |                   |              | cellular macromolecular complex disassembly                         |           | 0.710400664313888 |        |
| GO:0032984     | 21                       | 9.32911505383716e-26 | 49.7858094603598 |                   |              | macromolecular complex disassembly                                  |           | 0.730814476506816 |        |
| GO:0072594     | 21                       | 1.59168676835374e-24 | 42.9089732528041 |                   |              | establishment of protein localization to organelle                  |           | 0.832883537471455 |        |
| GO:0019058     | 231                      | 2.29831854276085e-23 | 37.321052631579  | 0.943118123313265 |              | viral infectious cycle                                              |           |                   | 21     |
| GO:0022415     | 21                       | 2.84789655475449e-22 | 32.7255009909711 |                   |              | viral reproductive process                                          |           | 1.06151823403225  |        |
| GO:0071845     | 284                      | 1.83803761985036e-21 | 29.6887132279368 |                   |              | cellular component disassembly at cellular level                    |           | 1.1595045325583   | 21     |
| GO:0022411     | 288                      | 2.46690905591522e-21 | 29.235659373152  | 1.17583558231264  |              | cellular component disassembly                                      |           |                   | 21     |
| GO:0016032     | 21                       | 2.62847622369186e-17 | 17.9438188494492 |                   |              | viral reproduction                                                  |           | 1.84132585980209  |        |
| GO:0033365     | 21                       | 6.90344421122322e-17 | 17.0435491383326 |                   |              | protein localization to organelle                                   |           | 1.93114663345097  |        |

Stable4\_20PerPair

|                |                                          |                                                                     |                    |            |        |                   |         |         |        |     |
|----------------|------------------------------------------|---------------------------------------------------------------------|--------------------|------------|--------|-------------------|---------|---------|--------|-----|
| GO:0006605     | 7.20480194752119e-17                     | 17.00470547229                                                      | 1.93522939588956   | 21         |        |                   |         |         |        |     |
| 474            | protein targeting                        |                                                                     |                    |            |        |                   |         |         |        |     |
| GO:0042273     | 1.38548381246585e-05                     | 85.6130952380952                                                    | 0.0489931492630268 |            |        |                   |         |         |        |     |
| 3              | 12                                       | ribosomal large subunit biogenesis                                  |                    |            |        |                   |         |         |        |     |
| Tissue:        | Skin_Sun_Exposed_Lower_leg=>Nerve_Tibial |                                                                     | Type:              | asymmetric |        |                   |         |         |        |     |
| SourceGene:    | PRG4(ENSG00000116690.7)                  |                                                                     |                    |            |        |                   |         |         |        |     |
| TargetGeneSet: | RPL22                                    | SLC45A1                                                             | RP4                | CROCCP3    | RPL11  | GTF2B             | RPL5    | VPS45   |        |     |
| PLXNA2         | RP11                                     | FAM179A                                                             | PPM1B              | THSD7B     | STK39  | SATB2             | RPL32   | RPL15   | SPICE1 |     |
| RPL34          | CTD                                      | EEF1A1P19                                                           |                    | ARSK       | CAMLG  | SLU7              | RPL10A  | EEF1A1  | BCKDHB | ELN |
| GNAI1          | CPSF4                                    | U6                                                                  | RPL30              | EIF3E      | EIF3H  | RPS6              | RPL12   | NUDT5   | OR13A1 |     |
| RPS13          | FAU                                      | RPS25                                                               | LGR5               | RPS2P5     | ZNF605 | GPR137C           | RSL24D1 | RPS3AP6 | RPL4   |     |
| HEATR3         | WSCD1                                    | MAPK7                                                               | RNF112             | FAM106B    | RPL23A | RPL17             | RPL19   | TMEM104 | SOCS6  |     |
| SAMD1          | ZNF233                                   | FTL                                                                 | GYS1               | FER1L4     | LSS    | EIF3L             | RPS4X   | RPL10   |        |     |
| GOBPID         | Pvalue                                   | OddsRatio                                                           | ExpCount           | Count      | Size   | Term              |         |         |        |     |
| GO:0006413     | 4.35570908347227e-31                     | 86.2532967032967                                                    |                    |            |        | 0.525915161580513 |         |         |        |     |
| 22             | 152                                      | translational initiation                                            |                    |            |        |                   |         |         |        |     |
| GO:0006414     | 9.81471333792888e-31                     | 112.282352941176                                                    |                    |            |        | 0.363296657670749 |         |         |        |     |
| 20             | 105                                      | translational elongation                                            |                    |            |        |                   |         |         |        |     |
| GO:0006415     | 5.3704315342553e-30                      | 121.976254480287                                                    |                    |            |        | 0.31485710331465  |         |         |        |     |
| 19             | 91                                       | translational termination                                           |                    |            |        |                   |         |         |        |     |
| GO:0000184     | 1.48520467396305e-29                     | 96.3097643097643                                                    |                    |            |        | 0.411736212026849 |         |         |        |     |
| 20             | 119                                      | nuclear-transcribed mRNA catabolic process, nonsense-mediated decay |                    |            |        |                   |         |         |        |     |
| GO:0006614     | 1.0549507204945e-28                      | 102.019879969993                                                    |                    |            |        | 0.363296657670749 |         |         |        |     |
| 19             | 105                                      | SRP-dependent cotranslational protein targeting to membrane         |                    |            |        |                   |         |         |        |     |
| GO:0006613     | 1.28270559702417e-28                     | 100.840192806822                                                    |                    |            |        | 0.366756625839042 |         |         |        |     |
| 19             | 106                                      | cotranslational protein targeting to membrane                       |                    |            |        |                   |         |         |        |     |
| GO:0045047     | 1.28270559702417e-28                     | 100.840192806822                                                    |                    |            |        | 0.366756625839042 |         |         |        |     |
| 19             | 106                                      | protein targeting to ER                                             |                    |            |        |                   |         |         |        |     |
| GO:0072599     | 1.28270559702417e-28                     | 100.840192806822                                                    |                    |            |        | 0.366756625839042 |         |         |        |     |
| 19             | 106                                      | establishment of protein localization to endoplasmic reticulum      |                    |            |        |                   |         |         |        |     |
| GO:0070972     | 1.15508207417614e-27                     | 88.5428478331704                                                    |                    |            |        | 0.408276243858556 |         |         |        |     |
| 19             | 118                                      | protein localization to endoplasmic reticulum                       |                    |            |        |                   |         |         |        |     |
| GO:0000956     | 2.52199054182393e-26                     | 63.7673378076063                                                    |                    |            |        | 0.584734620441492 |         |         |        |     |
| 20             | 169                                      | nuclear-transcribed mRNA catabolic process                          |                    |            |        |                   |         |         |        |     |
| GO:0006402     | 7.43531417677252e-26                     | 60.0970464135021                                                    |                    |            |        | 0.615874333956128 |         |         |        |     |
| 20             | 178                                      | mRNA catabolic process                                              |                    |            |        |                   |         |         |        |     |
| GO:0019080     | 1.65882790846359e-25                     | 66.2539100684262                                                    |                    |            |        | 0.522455193412221 |         |         |        |     |
| 19             | 151                                      | viral genome expression                                             |                    |            |        |                   |         |         |        |     |
| GO:0019083     | 1.65882790846359e-25                     | 66.2539100684262                                                    |                    |            |        | 0.522455193412221 |         |         |        |     |
| 19             | 151                                      | viral transcription                                                 |                    |            |        |                   |         |         |        |     |
| GO:0006612     | 2.15571449226425e-25                     | 65.2558979297063                                                    |                    |            |        | 0.529375129748806 |         |         |        |     |
| 19             | 153                                      | protein targeting to membrane                                       |                    |            |        |                   |         |         |        |     |
| GO:0043624     | 2.15571449226425e-25                     | 65.2558979297063                                                    |                    |            |        | 0.529375129748806 |         |         |        |     |
| 19             | 153                                      | cellular protein complex disassembly                                |                    |            |        |                   |         |         |        |     |
| GO:0043241     | 4.08474764064686e-25                     | 62.8865165931771                                                    |                    |            |        | 0.546674970590271 |         |         |        |     |
| 19             | 158                                      | protein complex disassembly                                         |                    |            |        |                   |         |         |        |     |
| GO:0006401     | 1.3805767162083e-24                      | 51.2288288288288                                                    |                    |            |        | 0.709293474500035 |         |         |        |     |
| 20             | 205                                      | RNA catabolic process                                               |                    |            |        |                   |         |         |        |     |
| GO:0034623     | 2.75125290830841e-24                     | 56.331737773153                                                     | 0.602034461282956  |            |        | 19                |         |         |        |     |
| 174            |                                          | cellular macromolecular complex disassembly                         |                    |            |        |                   |         |         |        |     |
| GO:0032984     | 4.80452761347157e-24                     | 54.5522177419355                                                    |                    |            |        | 0.61933430212442  |         |         |        |     |
| 19             | 179                                      | macromolecular complex disassembly                                  |                    |            |        |                   |         |         |        |     |
| GO:0019058     | 1.59507992332374e-23                     | 44.8341232227488                                                    |                    |            |        | 0.799252646875649 |         |         |        |     |
| 20             | 231                                      | viral infectious cycle                                              |                    |            |        |                   |         |         |        |     |
| GO:0072594     | 6.2000572913919e-23                      | 47.0974716652136                                                    |                    |            |        | 0.705833506331742 |         |         |        |     |
| 19             | 204                                      | establishment of protein localization to organelle                  |                    |            |        |                   |         |         |        |     |
| GO:0022415     | 1.76520224049109e-22                     | 39.3361111111111                                                    |                    |            |        | 0.899591723756141 |         |         |        |     |
| 20             | 260                                      | viral reproductive process                                          |                    |            |        |                   |         |         |        |     |
| GO:0071845     | 3.62015978859154e-20                     | 32.6943396226415                                                    |                    |            |        | 0.98263095979517  |         |         |        |     |
| 19             | 284                                      | cellular component disassembly at cellular level                    |                    |            |        |                   |         |         |        |     |
| GO:0022411     | 4.7241771343403e-20                      | 32.1990646360475                                                    |                    |            |        | 0.996470832468341 |         |         |        |     |
| 19             | 288                                      | cellular component disassembly                                      |                    |            |        |                   |         |         |        |     |
| GO:0016032     | 4.42119662935522e-19                     | 23.5277465918204                                                    |                    |            |        | 1.56044564390008  |         |         |        |     |

Stable4\_20PerPair

|                                                  |          |                                                                     |                  |                  |                  |                   |           |                   |            |
|--------------------------------------------------|----------|---------------------------------------------------------------------|------------------|------------------|------------------|-------------------|-----------|-------------------|------------|
| 21                                               | 451      | viral reproduction                                                  |                  |                  |                  |                   |           |                   |            |
| GO:0033365                                       |          | 2.54654235090876e-17                                                | 20.5268579838116 |                  |                  |                   |           | 1.63656494360252  |            |
| 20                                               | 473      | protein localization to organelle                                   |                  |                  |                  |                   |           |                   |            |
| GO:0006605                                       |          | 2.65331051473204e-17                                                | 20.4801762114537 |                  |                  |                   |           | 1.64002491177081  |            |
| 20                                               | 474      | protein targeting                                                   |                  |                  |                  |                   |           |                   |            |
| GO:0022613                                       |          | 1.14224741638247e-05                                                | 10.5911030509921 |                  |                  |                   |           | 0.778492837865892 |            |
| 7                                                | 225      | ribonucleoprotein complex biogenesis                                |                  |                  |                  |                   |           |                   |            |
| GO:0071843                                       |          | 1.68953775952073e-05                                                | 9.94216118684844 |                  |                  |                   |           | 0.826932392221992 |            |
| 7                                                | 239      | cellular component biogenesis at cellular level                     |                  |                  |                  |                   |           |                   |            |
| Tissue: Nerve_Tibial=>Skin_Sun_Exposed_Lower_leg |          |                                                                     |                  | Type: asymmetric |                  |                   |           |                   |            |
| SourceGene: RP11-134P9.1(ENSG00000233791.1)      |          |                                                                     |                  |                  |                  |                   |           |                   |            |
| TargetGeneSet:                                   |          | PADI3                                                               | PTGFRN           | RP11             | TCHH             | S100A3            | Clorf204  | VSIG8             |            |
| MYCNOS                                           | LYG2     | ALS2CL                                                              | RAP2B            | RP1              | TTYH3            | LRRC4             | CUL1      | RP4               | LZTS1 BNC2 |
| KRTAP5-3                                         |          | TMPRSS5                                                             | CCND2            | GPRC5D           | KRT81            | KRT83             | KRT85     | KRT82             | KRT71      |
| BEST3                                            | RARA     | KRT25                                                               | KRT26            | KRT27            | KRT28            | KRTAP3-3          |           | KRTAP3-1          |            |
| KRTAP1-3                                         |          | KRTAP2-2                                                            |                  | KRTAP4-9         |                  | KRTAP4-12         |           | KRTAP4-6          |            |
| KRTAP4-5                                         |          | KRTAP4-3                                                            |                  | KRTAP9-2         |                  | KRTAP9-3          |           | KRTAP9-8          |            |
| KRTAP16-1                                        |          | KRTAP17-1                                                           |                  | KRT33A           | KRT34            | KRT38             | KRT32     | KRT35             | KRT36      |
| TIMM21                                           | TGM6     | CST1                                                                | KRTAP24-1        |                  | KRTAP26-1        |                   | KRTAP13-2 |                   | KRTAP13-1  |
| KRTAP19-1                                        |          | KRTAP19-3                                                           |                  | KRTAP19-5        |                  | KRTAP11-1         |           | KRTAP10-1         |            |
| KRTAP10-3                                        |          | KRTAP10-5                                                           |                  | KRTAP10-6        |                  | KRTAP10-7         |           | KRTAP10-8         |            |
| KRTAP10-9                                        |          | KRTAP10-10                                                          |                  | KRTAP12-3        |                  | KRTAP12-2         |           | KRTAP12-1         |            |
| KRTAP10-12                                       |          | APOBEC3C                                                            |                  |                  |                  |                   |           |                   |            |
| GOBPID                                           | Pvalue   | OddsRatio                                                           | ExpCount         | Count            | Size             | Term              |           |                   |            |
| GO:0008544                                       |          | 1.21542717159529e-10                                                | 26.0802355539198 |                  |                  | 0.569095564320808 |           |                   |            |
| 10                                               | 257      | epidermis development                                               |                  |                  | Type: cluster    |                   |           |                   |            |
| Tissue: Nerve_Tibial=>Skin_Sun_Exposed_Lower_leg |          |                                                                     |                  | Type: cluster    |                  |                   |           |                   |            |
| SourceGene: RP11-134P9.1(ENSG00000233791.1)      |          |                                                                     |                  |                  |                  |                   |           |                   |            |
| TargetGeneSet:                                   |          | PADI3                                                               | PTGFRN           | RP11             | TCHH             | S100A3            | Clorf204  | VSIG8             |            |
| MYCNOS                                           | LYG2     | ALS2CL                                                              | RAP2B            | RP1              | TTYH3            | LRRC4             | CUL1      | RP4               | LZTS1 BNC2 |
| KRTAP5-3                                         |          | TMPRSS5                                                             | CCND2            | GPRC5D           | KRT81            | KRT83             | KRT85     | KRT82             | KRT71      |
| BEST3                                            | RARA     | KRT25                                                               | KRT26            | KRT27            | KRT28            | KRTAP3-3          |           | KRTAP3-1          |            |
| KRTAP1-3                                         |          | KRTAP2-2                                                            |                  | KRTAP4-9         |                  | KRTAP4-12         |           | KRTAP4-6          |            |
| KRTAP4-5                                         |          | KRTAP4-3                                                            |                  | KRTAP9-2         |                  | KRTAP9-3          |           | KRTAP9-8          |            |
| KRTAP16-1                                        |          | KRTAP17-1                                                           |                  | KRT33A           | KRT34            | KRT38             | KRT32     | KRT35             | KRT36      |
| TIMM21                                           | TGM6     | CST1                                                                | KRTAP24-1        |                  | KRTAP26-1        |                   | KRTAP13-2 |                   | KRTAP13-1  |
| KRTAP19-1                                        |          | KRTAP19-3                                                           |                  | KRTAP19-5        |                  | KRTAP11-1         |           | KRTAP10-1         |            |
| KRTAP10-3                                        |          | KRTAP10-5                                                           |                  | KRTAP10-6        |                  | KRTAP10-7         |           | KRTAP10-8         |            |
| KRTAP10-9                                        |          | KRTAP10-10                                                          |                  | KRTAP12-3        |                  | KRTAP12-2         |           | KRTAP12-1         |            |
| KRTAP10-12                                       |          | APOBEC3C                                                            |                  |                  |                  |                   |           |                   |            |
| GOBPID                                           | Pvalue   | OddsRatio                                                           | ExpCount         | Count            | Size             | Term              |           |                   |            |
| GO:0008544                                       |          | 1.21542717159529e-10                                                | 26.0802355539198 |                  |                  | 0.569095564320808 |           |                   |            |
| 10                                               | 257      | epidermis development                                               |                  |                  | Type: asymmetric |                   |           |                   |            |
| Tissue: Skin_Sun_Exposed_Lower_leg=>Nerve_Tibial |          |                                                                     |                  | Type: asymmetric |                  |                   |           |                   |            |
| SourceGene: RP11-359P5.1(ENSG00000249996.1)      |          |                                                                     |                  |                  |                  |                   |           |                   |            |
| TargetGeneSet:                                   |          | PLA2G2A                                                             | RP11             | SORT1            | Clorf9           | TTC32             | RPLP0P6   | RPL15             | GPR160     |
| EIF4G1                                           | HSD17B11 |                                                                     | ADH1C            | IL6ST            | CTD              | GNB2L1            | PACSIN1   | RPL10A            | CTB        |
| PNPLA8                                           | SSPO     | EIF3E                                                               | RPL7A            | FAM208B          | C10orf95         |                   | MICAL2    | MICALCL           | ABTB2      |
| KLRF1                                            | FAM19A2  | RPL18AP3                                                            |                  | PPTC7            | RPLP0            | OXA1L             | ARID4A    | TBC1D2B           | GOLGA6L4   |
| OR2C1                                            | C16orf46 |                                                                     | RPL26            | RPL23A           | COX11            | TEX2              | RPL13A    | ZNF28             | RPS5       |
| CBR3-AS1                                         |          | RPL10                                                               |                  |                  |                  |                   |           |                   |            |
| GOBPID                                           | Pvalue   | OddsRatio                                                           | ExpCount         | Count            | Size             | Term              |           |                   |            |
| GO:0000184                                       |          | 1.79752529619068e-15                                                | 63.3651368760064 |                  |                  | 0.279980624178258 |           |                   |            |
| 11                                               | 119      | nuclear-transcribed mRNA catabolic process, nonsense-mediated decay |                  |                  | Type: asymmetric |                   |           |                   |            |
| GO:0006413                                       |          | 2.81102848889924e-14                                                | 48.4230650632131 |                  |                  | 0.357622309874749 |           |                   |            |
| 11                                               | 152      | translational initiation                                            |                  |                  | Type: asymmetric |                   |           |                   |            |
| GO:0006414                                       |          | 3.00209303319272e-14                                                | 62.8157894736842 |                  |                  | 0.24704172721611  |           |                   |            |
| 10                                               | 105      | translational elongation                                            |                  |                  | Type: asymmetric |                   |           |                   |            |
| GO:0000956                                       |          | 9.14113499326756e-14                                                | 43.1615299944964 |                  |                  | 0.397619541900215 |           |                   |            |
| 11                                               | 169      | nuclear-transcribed mRNA catabolic process                          |                  |                  | Type: asymmetric |                   |           |                   |            |
| GO:0006402                                       |          | 1.62388034869741e-13                                                | 40.8096849778703 |                  |                  | 0.418794547090167 |           |                   |            |
| 11                                               | 178      | mRNA catabolic process                                              |                  |                  | Type: asymmetric |                   |           |                   |            |
| GO:0006415                                       |          | 4.78713812070416e-13                                                | 62.9341463414634 |                  |                  | 0.214102830253962 |           |                   |            |

STable4\_20PerPair

|            |     |                                                                     |                  |                   |  |                   |                  |     |  |
|------------|-----|---------------------------------------------------------------------|------------------|-------------------|--|-------------------|------------------|-----|--|
| 9          | 91  | translational termination                                           |                  |                   |  |                   |                  |     |  |
| GO:0006401 |     | 7.69623482128468e-13                                                | 35.0634244733303 |                   |  | 0.482319562660024 |                  |     |  |
| 11         | 205 | RNA catabolic process                                               |                  |                   |  |                   |                  |     |  |
| GO:0043624 |     | 1.38765298793194e-12                                                | 41.5909090909091 |                   |  | 0.359975088229188 |                  |     |  |
| 10         | 153 | cellular protein complex disassembly                                |                  |                   |  |                   |                  |     |  |
| GO:0006614 |     | 1.79564410525806e-12                                                | 53.70375         | 0.24704172721611  |  |                   |                  | 9   |  |
| 105        |     | SRP-dependent cotranslational protein targeting to membrane         |                  |                   |  |                   |                  |     |  |
| GO:0043241 |     | 1.91798284449093e-12                                                | 40.1717342342342 |                   |  | 0.371738980001384 |                  |     |  |
| 10         | 158 | protein complex disassembly                                         |                  |                   |  |                   |                  |     |  |
| GO:0006613 |     | 1.95917933070476e-12                                                | 53.1463917525773 |                   |  | 0.249394505570549 |                  |     |  |
| 9          | 106 | cotranslational protein targeting to membrane                       |                  |                   |  |                   |                  |     |  |
| GO:0045047 |     | 1.95917933070476e-12                                                | 53.1463917525773 |                   |  | 0.249394505570549 |                  |     |  |
| 9          | 106 | protein targeting to ER                                             |                  |                   |  |                   |                  |     |  |
| GO:0072599 |     | 1.95917933070476e-12                                                | 53.1463917525773 |                   |  | 0.249394505570549 |                  |     |  |
| 9          | 106 | establishment of protein localization to endoplasmic reticulum      |                  |                   |  |                   |                  |     |  |
| GO:0034623 |     | 5.04667242327994e-12                                                | 36.2118902439024 |                   |  | 0.40938343367241  |                  |     |  |
| 10         | 174 | cellular macromolecular complex disassembly                         |                  |                   |  |                   |                  |     |  |
| GO:0070972 |     | 5.23481552223919e-12                                                | 47.2557798165138 |                   |  | 0.277627845823818 |                  |     |  |
| 9          | 118 | protein localization to endoplasmic reticulum                       |                  |                   |  |                   |                  |     |  |
| GO:0032984 |     | 6.69863956678448e-12                                                | 35.1282051282051 |                   |  | 0.421147325444606 |                  |     |  |
| 10         | 179 | macromolecular complex disassembly                                  |                  |                   |  |                   |                  |     |  |
| GO:0019080 |     | 4.90384069790226e-11                                                | 36.1901408450704 |                   |  | 0.35526953152031  |                  |     |  |
| 9          | 151 | viral genome expression                                             |                  |                   |  |                   |                  |     |  |
| GO:0019083 |     | 4.90384069790226e-11                                                | 36.1901408450704 |                   |  | 0.35526953152031  |                  |     |  |
| 9          | 151 | viral transcription                                                 |                  |                   |  |                   |                  |     |  |
| GO:0006612 |     | 5.5208947747555e-11                                                 | 35.6825          | 0.359975088229188 |  |                   | 9                | 153 |  |
|            |     | protein targeting to membrane                                       |                  |                   |  |                   |                  |     |  |
| GO:0071845 |     | 6.34576895101125e-10                                                | 21.50699513382   | 0.668189052660715 |  |                   |                  | 10  |  |
| 284        |     | cellular component disassembly at cellular level                    |                  |                   |  |                   |                  |     |  |
| GO:0072594 |     | 7.21199214575709e-10                                                | 26.256           | 0.479966784305584 |  |                   | 9                | 204 |  |
|            |     | establishment of protein localization to organelle                  |                  |                   |  |                   |                  |     |  |
| GO:0022411 |     | 7.27008819346467e-10                                                | 21.1915467625899 |                   |  | 0.677600166078472 |                  |     |  |
| 10         | 288 | cellular component disassembly                                      |                  |                   |  |                   |                  |     |  |
| GO:0019058 |     | 2.16087239176098e-09                                                | 23.0189189189189 |                   |  | 0.543491799875441 |                  |     |  |
| 9          | 231 | viral infectious cycle                                              |                  |                   |  |                   |                  |     |  |
| GO:0022415 |     | 6.09193218574354e-09                                                | 20.3177689243028 |                   |  | 0.611722372154176 |                  |     |  |
| 9          | 260 | viral reproductive process                                          |                  |                   |  |                   |                  |     |  |
| GO:0016032 |     | 6.79301792375875e-07                                                | 11.3823529411765 |                   |  | 1.06110303785205  |                  |     |  |
| 9          | 451 | viral reproduction                                                  |                  |                   |  |                   |                  |     |  |
| GO:0033365 |     | 1.01075029464476e-06                                                | 10.8256034482759 |                   |  | 1.11286416164971  |                  |     |  |
| 9          | 473 | protein localization to organelle                                   |                  |                   |  |                   |                  |     |  |
| GO:0006605 |     | 1.02867318047624e-06                                                | 10.8015483870968 |                   |  | 1.11521694000415  |                  |     |  |
| 9          | 474 | protein targeting                                                   |                  |                   |  |                   |                  |     |  |
| GO:0071843 |     | 1.7535784145997e-05                                                 | 13.04475781729   | 0.562314026710954 |  |                   |                  | 6   |  |
| 239        |     | cellular component biogenesis at cellular level                     |                  |                   |  |                   |                  |     |  |
|            |     | Tissue: Skin_Sun_Exposed_Lower_leg=>Nerve_Tibial                    |                  |                   |  |                   | Type: asymmetric |     |  |
|            |     | SourceGene: RP11-456P18.2(ENSG00000229808.1)                        |                  |                   |  |                   |                  |     |  |
|            |     | TargetGeneSet: RP3 C1QC C1QB HMGCL LAPTM5 CTSS SLAMF8 CD84 CD48     |                  |                   |  |                   |                  |     |  |
|            |     | ARHGAP30 CHIT1 TLR5 U4 GPX1 TRAT1 CD96 HCLS1 LRRCC33                |                  |                   |  |                   |                  |     |  |
|            |     | C4orf19 RBM47 MRPL1 CTD FYB EMB ERBB2IP CCDC112 ABLIM3 ARHGEF37     |                  |                   |  |                   |                  |     |  |
|            |     | CD74 GAPDHP71 LY86 HLA-H HLA-DRA HLA-DMA HLA-DOA COL11A2 DEFA6 FGD2 |                  |                   |  |                   |                  |     |  |
|            |     | BVES-AS1 AOA H GUSB NCF1C TFEC TBXAS1 RP11 EPB49 MYBL1              |                  |                   |  |                   |                  |     |  |
|            |     | LRRCC1 SLA SYK FGD3 NKX2-1 FCN1 WDFY4 PRF1 PAN3 OR52N4              |                  |                   |  |                   |                  |     |  |
|            |     | PLEKHA7 MS4A6A MS4A7 SLCO2B1 IL10RA SIAE CACNA2D4 PTPN6 C3AR1       |                  |                   |  |                   |                  |     |  |
|            |     | C12orf35 IRAK4 BIN2 NCKAP1L YEATS4 P2RX4 ERCC5 GZMH SERPINA1        |                  |                   |  |                   |                  |     |  |
|            |     | SPG11 ITGAL ACSF3 ZFP3 EVI2B EVI2A GHDC HMHA1 C19orf35              |                  |                   |  |                   |                  |     |  |
|            |     | TMPRSS9 TMIGD2 STXBP2 SUGP1 ZNF546 CEACAM21 NKG7 SIGLEC10           |                  |                   |  |                   |                  |     |  |
|            |     | LAIR1 FCAR MAFB PLTP RGS19 BRWD1-IT2 ITGB2 CECR6 APOBEC3G           |                  |                   |  |                   |                  |     |  |
|            |     | GPR34 WAS BTK GAB3                                                  |                  |                   |  |                   |                  |     |  |
|            |     | GOBPID Pvalue OddsRatio ExpCount Count Size Term                    |                  |                   |  |                   |                  |     |  |
|            |     | GO:0002253 5.51180325839901e-09 10.0056818181818 1.59317694277213   |                  |                   |  |                   |                  |     |  |
|            |     | 13 299 activation of immune response                                |                  |                   |  |                   |                  |     |  |
|            |     | GO:0050778 6.43565678999881e-09 8.90412698412698 1.93951975641824   |                  |                   |  |                   |                  |     |  |



Stable4\_20PerPair

|                                                                    |     |                                                                      |                  |                   |  |                    |    |  |
|--------------------------------------------------------------------|-----|----------------------------------------------------------------------|------------------|-------------------|--|--------------------|----|--|
| 14                                                                 | 364 | positive regulation of immune response                               |                  |                   |  |                    |    |  |
| GO:0050851                                                         |     | 1.7307211487588e-08                                                  | 16.5557275541796 |                   |  | 0.655387170438032  |    |  |
| 9                                                                  | 123 | antigen receptor-mediated signaling pathway                          |                  |                   |  |                    |    |  |
| GO:0002429                                                         |     | 3.42978619868544e-08                                                 | 15.2099146110057 |                   |  | 0.708670680229742  |    |  |
| 9                                                                  | 133 | immune response-activating cell surface receptor signaling pathway   |                  |                   |  |                    |    |  |
| GO:0002757                                                         |     | 4.32779456435286e-08                                                 | 10.5282738095238 |                   |  | 1.25216248010518   |    |  |
| 11                                                                 | 235 | immune response-activating signal transduction                       |                  |                   |  |                    |    |  |
| GO:0002768                                                         |     | 6.83749069799591e-08                                                 | 13.9598039215686 |                   |  | 0.767282541000623  |    |  |
| 9                                                                  | 144 | immune response-regulating cell surface receptor signaling pathway   |                  |                   |  |                    |    |  |
| GO:0002764                                                         |     | 7.50060801641483e-08                                                 | 9.94163150492264 |                   |  | 1.32143104283441   |    |  |
| 11                                                                 | 248 | immune response-regulating signaling pathway                         |                  |                   |  |                    |    |  |
| GO:0051251                                                         |     | 2.0292658794333e-06                                                  | 9.10279840091376 |                   |  | 1.14559546052176   |    |  |
| 9                                                                  | 215 | positive regulation of lymphocyte activation                         |                  |                   |  |                    |    |  |
| GO:0019886                                                         |     | 2.87593169441638e-06                                                 | 194.202702702703 |                   |  | 0.031970105875026  |    |  |
| 3                                                                  | 6   | antigen processing and presentation of exogenous peptide antigen via |                  |                   |  |                    |    |  |
| MHC class II                                                       |     |                                                                      |                  |                   |  |                    |    |  |
| GO:0050870                                                         |     | 3.42869900239267e-06                                                 | 10.1082955454788 |                   |  | 0.91114801743824   |    |  |
| 8                                                                  | 171 | positive regulation of T cell activation                             |                  |                   |  |                    |    |  |
| GO:0030593                                                         |     | 3.47657926738284e-06                                                 | 25.5252849002849 |                   |  | 0.234447443083524  |    |  |
| 5                                                                  | 44  | neutrophil chemotaxis                                                |                  |                   |  |                    |    |  |
| GO:0002696                                                         |     | 3.92689344981484e-06                                                 | 8.36068802521008 |                   |  | 1.24150577814684   |    |  |
| 9                                                                  | 233 | positive regulation of leukocyte activation                          |                  |                   |  |                    |    |  |
| GO:0050867                                                         |     | 4.99799814425011e-06                                                 | 8.1033231474408  | 1.27880423500104  |  |                    | 9  |  |
| 240                                                                |     | positive regulation of cell activation                               |                  |                   |  |                    |    |  |
| GO:0002504                                                         |     | 5.06717964097792e-06                                                 | 43.7016742770167 |                   |  | 0.117223721541762  |    |  |
| 4                                                                  | 22  | antigen processing and presentation of peptide or polysaccharide     |                  |                   |  |                    |    |  |
| antigen via MHC class II                                           |     |                                                                      |                  |                   |  |                    |    |  |
| GO:0050900                                                         |     | 5.16980516194615e-06                                                 | 8.06782454361055 |                   |  | 1.28413258598021   |    |  |
| 9                                                                  | 241 | leukocyte migration                                                  |                  |                   |  |                    |    |  |
| GO:0002252                                                         |     | 5.8858160284775e-06                                                  | 6.22177777777778 |                   |  | 2.05674347796      | 11 |  |
| 386                                                                |     | immune effector process                                              |                  |                   |  |                    |    |  |
| GO:0042110                                                         |     | 7.06599692442657e-06                                                 | 6.79370139593296 |                   |  | 1.69974396235555   |    |  |
| 10                                                                 | 319 | T cell activation                                                    |                  |                   |  |                    |    |  |
| GO:0050850                                                         |     | 7.30147993351765e-06                                                 | 39.3260273972603 |                   |  | 0.127880423500104  |    |  |
| 4                                                                  | 24  | positive regulation of calcium-mediated signaling                    |                  |                   |  |                    |    |  |
| GO:0002694                                                         |     | 7.46462572720965e-06                                                 | 6.74905216681864 |                   |  | 1.71040066431389   |    |  |
| 10                                                                 | 321 | regulation of leukocyte activation                                   |                  |                   |  |                    |    |  |
| GO:0002495                                                         |     | 7.99090519834147e-06                                                 | 116.505405405405 |                   |  | 0.0426268078333679 |    |  |
| 3                                                                  | 8   | antigen processing and presentation of peptide antigen via MHC class |                  |                   |  |                    |    |  |
| II                                                                 |     |                                                                      |                  |                   |  |                    |    |  |
| GO:0002250                                                         |     | 1.01043864714539e-05                                                 | 8.65537757437071 |                   |  | 1.05501349387586   |    |  |
| 8                                                                  | 198 | adaptive immune response                                             |                  |                   |  |                    |    |  |
| GO:0045579                                                         |     | 1.19403604403125e-05                                                 | 97.0810810810811 |                   |  | 0.0479551588125389 |    |  |
| 3                                                                  | 9   | positive regulation of B cell differentiation                        |                  |                   |  |                    |    |  |
| GO:0050865                                                         |     | 1.33103492590027e-05                                                 | 6.29330823360674 |                   |  | 1.82762438585565   |    |  |
| 10                                                                 | 343 | regulation of cell activation                                        |                  |                   |  |                    |    |  |
| GO:0045619                                                         |     | 1.42055282453058e-05                                                 | 12.9768287142208 |                   |  | 0.527506746937928  |    |  |
| 6                                                                  | 99  | regulation of lymphocyte differentiation                             |                  |                   |  |                    |    |  |
| GO:0050852                                                         |     | 1.42055282453058e-05                                                 | 12.9768287142208 |                   |  | 0.527506746937928  |    |  |
| 6                                                                  | 99  | T cell receptor signaling pathway                                    |                  |                   |  |                    |    |  |
| GO:0046649                                                         |     | 1.73307415273254e-05                                                 | 5.51026856240126 |                   |  | 2.30717597398104   |    |  |
| 11                                                                 | 433 | lymphocyte activation                                                |                  |                   |  |                    |    |  |
| GO:0051249                                                         |     | 1.87708302529189e-05                                                 | 6.81086303134392 |                   |  | 1.50792332710539   |    |  |
| 9                                                                  | 283 | regulation of lymphocyte activation                                  |                  |                   |  |                    |    |  |
| GO:0045621                                                         |     | 1.92243727644204e-05                                                 | 17.442738791423  | 0.330357760708601 |  |                    | 5  |  |
| 62                                                                 |     | positive regulation of lymphocyte differentiation                    |                  |                   |  |                    |    |  |
| Tissue: Nerve_Tibial=>Skin_Sun_Exposed_Lower_leg Type: asymmetric  |     |                                                                      |                  |                   |  |                    |    |  |
| SourceGene: RP11-626E13.1(ENSG00000235902.1)                       |     |                                                                      |                  |                   |  |                    |    |  |
| TargetGeneSet: RPL11 RPS8 RPL5 NBP10 MIR765 JMJD4 RN5S18 RPL23AP23 |     |                                                                      |                  |                   |  |                    |    |  |
| SH3YL1 RPS7 RPL31 THUMP3 RPL32 RPL15 RPL14 RPL24 RPL32P3 RP11      |     |                                                                      |                  |                   |  |                    |    |  |
| RPL35A CAMLG RPS6 EXOSC2 CTSD C11orf9 RNF169 RPS25 POU6F1          |     |                                                                      |                  |                   |  |                    |    |  |
| PFDN5 RPL14P1 RPL6 RSL24D1 RPS3AP6 RPS17L FAM103A1 RPS15A CTD CTC1 |     |                                                                      |                  |                   |  |                    |    |  |
| RPL26 RPS7P1 RPL23A RPL19 RPL27 ZNF529 PSG7 RPS11 KCNS1 FAM209B    |     |                                                                      |                  |                   |  |                    |    |  |

STable4\_20PerPair

| CECR7      | RP4 | RBMX2 | OddsRatio            | ExpCount         | Count             | Size | Term                                                                |
|------------|-----|-------|----------------------|------------------|-------------------|------|---------------------------------------------------------------------|
| GO:0006415 | 20  | 91    | 6.92165224449662e-36 | 252.535211267606 |                   |      | 0.226697114386548                                                   |
|            |     |       |                      |                  |                   |      | translational termination                                           |
| GO:0006414 | 20  | 105   | 1.64673108293849e-34 | 210.735294117647 |                   |      | 0.26157359352294                                                    |
|            |     |       |                      |                  |                   |      | translational elongation                                            |
| GO:0006614 | 20  | 105   | 1.64673108293849e-34 | 210.735294117647 |                   |      | 0.26157359352294                                                    |
|            |     |       |                      |                  |                   |      | SRP-dependent cotranslational protein targeting to membrane         |
| GO:0006613 | 20  | 106   | 2.02753692052414e-34 | 208.270348837209 |                   |      | 0.26406477060411                                                    |
|            |     |       |                      |                  |                   |      | cotranslational protein targeting to membrane                       |
| GO:0045047 | 20  | 106   | 2.02753692052414e-34 | 208.270348837209 |                   |      | 0.26406477060411                                                    |
|            |     |       |                      |                  |                   |      | protein targeting to ER                                             |
| GO:0072599 | 20  | 106   | 2.02753692052414e-34 | 208.270348837209 |                   |      | 0.26406477060411                                                    |
|            |     |       |                      |                  |                   |      | establishment of protein localization to endoplasmic reticulum      |
| GO:0070972 | 20  | 118   | 2.10251040588688e-33 | 182.614795918367 |                   |      | 0.293958895578161                                                   |
|            |     |       |                      |                  |                   |      | protein localization to endoplasmic reticulum                       |
| GO:0000184 | 20  | 119   | 2.5245746104842e-33  | 180.757575757576 |                   |      | 0.296450072659332                                                   |
|            |     |       |                      |                  |                   |      | nuclear-transcribed mRNA catabolic process, nonsense-mediated decay |
| GO:0000956 | 21  | 169   | 3.57071027686695e-32 | 134.958108108108 |                   |      | 0.421008926717874                                                   |
|            |     |       |                      |                  |                   |      | nuclear-transcribed mRNA catabolic process                          |
| GO:0006402 | 21  | 178   | 1.12637427027264e-31 | 127.141401273885 |                   |      | 0.443429520448412                                                   |
|            |     |       |                      |                  |                   |      | mRNA catabolic process                                              |
| GO:0019080 | 20  | 151   | 4.16001389418109e-31 | 136.297709923664 |                   |      | 0.376167739256799                                                   |
|            |     |       |                      |                  |                   |      | viral genome expression                                             |
| GO:0019083 | 20  | 151   | 4.16001389418109e-31 | 136.297709923664 |                   |      | 0.376167739256799                                                   |
|            |     |       |                      |                  |                   |      | viral transcription                                                 |
| GO:0006413 | 20  | 152   | 4.78521822791732e-31 | 135.255681818182 |                   |      | 0.37865891633797                                                    |
|            |     |       |                      |                  |                   |      | translational initiation                                            |
| GO:0006612 | 20  | 153   | 5.4989379484775e-31  | 134.229323308271 |                   |      | 0.381150093419141                                                   |
|            |     |       |                      |                  |                   |      | protein targeting to membrane                                       |
| GO:0043624 | 20  | 153   | 5.4989379484775e-31  | 134.229323308271 |                   |      | 0.381150093419141                                                   |
|            |     |       |                      |                  |                   |      | cellular protein complex disassembly                                |
| GO:0043241 | 20  | 158   | 1.08622902858703e-30 | 129.320652173913 |                   |      | 0.393605978824995                                                   |
|            |     |       |                      |                  |                   |      | protein complex disassembly                                         |
| GO:0006401 | 21  | 205   | 2.51579554452287e-30 | 108.279347826087 |                   |      | 0.510691301640025                                                   |
|            |     |       |                      |                  |                   |      | RNA catabolic process                                               |
| GO:0034623 | 174 | 205   | 8.28925107923251e-30 | 115.75487012987  | 0.433464812123728 | 20   |                                                                     |
|            |     |       |                      |                  |                   |      | cellular macromolecular complex disassembly                         |
| GO:0032984 | 20  | 179   | 1.50170622681188e-29 | 112.075471698113 |                   |      | 0.445920697529583                                                   |
|            |     |       |                      |                  |                   |      | macromolecular complex disassembly                                  |
| GO:0072594 | 20  | 204   | 2.29719178236226e-28 | 96.6779891304348 |                   |      | 0.508200124558854                                                   |
|            |     |       |                      |                  |                   |      | establishment of protein localization to organelle                  |
| GO:0019058 | 20  | 231   | 3.01029488319043e-27 | 84.1469194312796 |                   |      | 0.575461905750467                                                   |
|            |     |       |                      |                  |                   |      | viral infectious cycle                                              |
| GO:0022415 | 260 | 260   | 3.42319991022414e-26 | 73.828125        | 0.647706041104422 | 20   |                                                                     |
|            |     |       |                      |                  |                   |      | viral reproductive process                                          |
| GO:0071845 | 20  | 284   | 2.08122307600338e-25 | 67.0028409090909 |                   |      | 0.707494291052522                                                   |
|            |     |       |                      |                  |                   |      | cellular component disassembly at cellular level                    |
| GO:0022411 | 20  | 288   | 2.7679832832455e-25  | 65.9841417910448 |                   |      | 0.717458999377206                                                   |
|            |     |       |                      |                  |                   |      | cellular component disassembly                                      |
| GO:0016032 | 20  | 451   | 2.33832989655251e-21 | 40.5568445475638 |                   |      | 1.12352086360805                                                    |
|            |     |       |                      |                  |                   |      | viral reproduction                                                  |
| GO:0033365 | 20  | 473   | 6.03905485999849e-21 | 38.5264900662252 |                   |      | 1.17832675939381                                                    |
|            |     |       |                      |                  |                   |      | protein localization to organelle                                   |
| GO:0006605 | 20  | 474   | 6.29823720749117e-21 | 38.4388766519824 |                   |      | 1.18081793647498                                                    |
|            |     |       |                      |                  |                   |      | protein targeting                                                   |
| GO:0022613 | 14  | 225   | 9.19556629956182e-17 | 42.8384317104696 |                   |      | 0.560514843263442                                                   |
|            |     |       |                      |                  |                   |      | ribonucleoprotein complex biogenesis                                |
| GO:0071843 | 14  | 239   | 2.15048052944305e-16 | 40.1333333333333 |                   |      | 0.595391322399834                                                   |
|            |     |       |                      |                  |                   |      | cellular component biogenesis at cellular level                     |
| GO:0042254 | 12  | 149   | 9.32638157733248e-16 | 52.1094890510949 |                   |      | 0.371185385094457                                                   |
|            |     |       |                      |                  |                   |      | ribosome biogenesis                                                 |
| GO:0006364 |     |       | 5.21097056447939e-14 | 58.5965630114566 |                   |      | 0.259082416441769                                                   |

STable4\_20PerPair

|                          |          |                                                                    |                  |                  |      |                    |   |                    |  |
|--------------------------|----------|--------------------------------------------------------------------|------------------|------------------|------|--------------------|---|--------------------|--|
| 10                       | 104      | rRNA processing                                                    |                  |                  |      |                    |   |                    |  |
| GO:0016072               |          | 9.2709369723543e-14                                                | 55.0576923076923 |                  |      |                    |   | 0.274029478928794  |  |
| 10                       | 110      | rRNA metabolic process                                             |                  |                  |      |                    |   |                    |  |
| GO:0034470               |          | 3.8257783274865e-11                                                | 28.7955465587045 |                  |      |                    |   | 0.498235416234171  |  |
| 10                       | 200      | ncRNA processing                                                   |                  |                  |      |                    |   |                    |  |
| GO:0042273               |          | 5.6183419832097e-11                                                | 331.981566820276 |                  |      |                    |   | 0.0298941249740502 |  |
| 5                        | 12       | ribosomal large subunit biogenesis                                 |                  |                  |      |                    |   |                    |  |
| GO:0042274               |          | 6.01309559398377e-10                                               | 178.684863523573 |                  |      |                    |   | 0.0448411874610754 |  |
| 5                        | 18       | ribosomal small subunit biogenesis                                 |                  |                  |      |                    |   |                    |  |
| GO:0034660               |          | 1.22928431002903e-09                                               | 19.7762237762238 |                  |      |                    |   | 0.709985468133693  |  |
| 10                       | 285      | ncRNA metabolic process                                            |                  |                  |      |                    |   |                    |  |
| GO:0000028               |          | 2.82515477576935e-07                                               | 436.727272727273 |                  |      |                    |   | 0.0149470624870251 |  |
| 3                        | 6        | ribosomal small subunit assembly                                   |                  |                  |      |                    |   |                    |  |
| GO:0022618               |          | 3.54261731008932e-06                                               | 25.6720430107527 |                  |      |                    |   | 0.236661822711231  |  |
| 5                        | 95       | ribonucleoprotein complex assembly                                 |                  |                  |      |                    |   |                    |  |
| GO:0071826               |          | 4.56221489971051e-06                                               | 24.3123938879457 |                  |      |                    |   | 0.249117708117085  |  |
| 5                        | 100      | ribonucleoprotein complex subunit organization                     |                  |                  |      |                    |   |                    |  |
| GO:0042255               |          | 7.77602369431775e-06                                               | 100.713286713287 |                  |      |                    |   | 0.0398588332987337 |  |
| 3                        | 16       | ribosome assembly                                                  |                  |                  |      |                    |   |                    |  |
| Tissue: Skin_Sun         |          | Exposed_Lower_leg=>Nerve_Tibial                                    |                  |                  |      |                    |   | Type: asymmetric   |  |
| SourceGene:              |          | RP11-727A23.4(ENSG00000254676.1)                                   |                  |                  |      |                    |   |                    |  |
| TargetGeneSet:           |          | RPS6KA1 TMEM81 UXS1 CDK15 EPM2AIP1 GAP43 CLDN18 RP11               |                  |                  |      |                    |   |                    |  |
| RBM47                    | BTC      | SLC1A3 ERBB2IP CD74 HLA-H HLA-DRA HLA-DMB HLA-DMA HLA-DOA          |                  |                  |      |                    |   |                    |  |
| HLA-DPB1                 |          | KCNQ5 SNORD50A FTSJ2 CLDN12 HR SYK C9orf152                        |                  |                  |      |                    |   |                    |  |
| WDFY4                    | KIAA1274 | FGF8 KNDC1 RARRES3 ALKBH8 PTPRO MED21 LACC1                        |                  |                  |      |                    |   |                    |  |
| ARL11                    | APBA2    | KLHDC4 NUFIP2 IMPACT HMHA1 TMIGD2 FSD1 TMEM59L NUMBL BCL3          |                  |                  |      |                    |   |                    |  |
| BRWD1-IT2                |          | SSR4P1 TMEM27 GPR34                                                |                  |                  |      |                    |   |                    |  |
| GOBPID                   | Pvalue   | OddsRatio                                                          | ExpCount         | Count            | Size | Term               |   |                    |  |
| GO:0002504               |          | 9.3239907501338e-12                                                | 186.206896551724 |                  |      | 0.0532835097917099 |   |                    |  |
| 6                        | 22       | antigen processing and presentation of peptide or polysaccharide   |                  |                  |      |                    |   |                    |  |
| antigen via MHC class II |          |                                                                    |                  |                  |      |                    |   |                    |  |
| GO:0019882               |          | 6.51431909511458e-08                                               | 24.6051724137931 |                  |      | 0.368140613106359  |   |                    |  |
| 7                        | 152      | antigen processing and presentation                                |                  |                  |      |                    |   |                    |  |
| GO:0050867               |          | 8.23210804775444e-08                                               | 18.1149425287356 |                  |      | 0.581274652273199  |   |                    |  |
| 8                        | 240      | positive regulation of cell activation                             |                  |                  |      |                    |   |                    |  |
| GO:0050870               |          | 1.46119192084503e-07                                               | 21.7256097560976 |                  |      | 0.414158189744654  |   |                    |  |
| 7                        | 171      | positive regulation of T cell activation                           |                  |                  |      |                    |   |                    |  |
| GO:0019886               |          | 2.59012915558126e-07                                               | 450.40625        | 0.01453186630683 |      |                    | 3 |                    |  |
| 6                        | antigen  | processing and presentation of exogenous peptide antigen via MHC   |                  |                  |      |                    |   |                    |  |
| class II                 |          |                                                                    |                  |                  |      |                    |   |                    |  |
| GO:0050851               |          | 4.46117382246977e-07                                               | 25.2855879752431 |                  |      | 0.297903259290015  |   |                    |  |
| 6                        | 123      | antigen receptor-mediated signaling pathway                        |                  |                  |      |                    |   |                    |  |
| GO:0051251               |          | 6.90765278446614e-07                                               | 17.0769230769231 |                  |      | 0.520725209328074  |   |                    |  |
| 7                        | 215      | positive regulation of lymphocyte activation                       |                  |                  |      |                    |   |                    |  |
| GO:0002429               |          | 7.0750114798147e-07                                                | 23.2783057290253 |                  |      | 0.322123036468065  |   |                    |  |
| 6                        | 133      | immune response-activating cell surface receptor signaling pathway |                  |                  |      |                    |   |                    |  |
| GO:0002495               |          | 7.22829210925623e-07                                               | 270.20625        | 0.01937582174244 |      |                    | 3 |                    |  |
| 8                        | antigen  | processing and presentation of peptide antigen via MHC class II    |                  |                  |      |                    |   |                    |  |
| GO:0042110               |          | 7.23165851965889e-07                                               | 13.4381326664285 |                  |      | 0.772610891979794  |   |                    |  |
| 8                        | 319      | T cell activation                                                  |                  |                  |      |                    |   |                    |  |
| GO:0050863               |          | 8.31241752709878e-07                                               | 16.5911214953271 |                  |      | 0.535257075634904  |   |                    |  |
| 7                        | 221      | regulation of T cell activation                                    |                  |                  |      |                    |   |                    |  |
| GO:0031294               |          | 9.45662089990647e-07                                               | 34.1571428571429 |                  |      | 0.181648328835375  |   |                    |  |
| 5                        | 75       | lymphocyte costimulation                                           |                  |                  |      |                    |   |                    |  |
| GO:0031295               |          | 9.45662089990647e-07                                               | 34.1571428571429 |                  |      | 0.181648328835375  |   |                    |  |
| 5                        | 75       | T cell costimulation                                               |                  |                  |      |                    |   |                    |  |
| GO:0002768               |          | 1.12819095447537e-06                                               | 21.4062968515742 |                  |      | 0.348764791363919  |   |                    |  |
| 6                        | 144      | immune response-regulating cell surface receptor signaling pathway |                  |                  |      |                    |   |                    |  |
| GO:0002696               |          | 1.18502447723853e-06                                               | 15.6969026548673 |                  |      | 0.564320808248564  |   |                    |  |
| 7                        | 233      | positive regulation of leukocyte activation                        |                  |                  |      |                    |   |                    |  |
| GO:0060333               |          | 1.22632538943352e-06                                               | 32.3018018018018 |                  |      | 0.191336239706595  |   |                    |  |
| 5                        | 79       | interferon-gamma-mediated signaling pathway                        |                  |                  |      |                    |   |                    |  |
| GO:0050865               |          | 1.24856728025995e-06                                               | 12.4541735765616 |                  |      | 0.830738357207114  |   |                    |  |

Stable4\_20PerPair

|                                                  |          |                                                                |                  |                   |         |                   |        |                   |         |      |
|--------------------------------------------------|----------|----------------------------------------------------------------|------------------|-------------------|---------|-------------------|--------|-------------------|---------|------|
| 8                                                | 343      | regulation of cell activation                                  |                  |                   |         |                   |        |                   |         |      |
| GO:0002757                                       |          | 1.25477136142623e-06                                           | 15.5570175438596 |                   |         |                   |        | 0.569164763684174 |         |      |
| 7                                                | 235      | immune response-activating signal transduction                 |                  |                   |         |                   |        |                   |         |      |
| GO:0002764                                       |          | 1.79747702408908e-06                                           | 14.704356846473  | 0.600650474015639 |         |                   |        |                   | 7       |      |
| 248                                              |          | immune response-regulating signaling pathway                   |                  |                   |         |                   |        |                   |         |      |
| GO:0050778                                       |          | 1.94789146810557e-06                                           | 11.7020391177695 |                   |         |                   |        | 0.881599889281019 |         |      |
| 8                                                | 364      | positive regulation of immune response                         |                  |                   |         |                   |        |                   |         |      |
| GO:0071346                                       |          | 2.91011042818244e-06                                           | 26.8295880149813 |                   |         |                   |        | 0.22766590547367  |         |      |
| 5                                                | 94       | cellular response to interferon-gamma                          |                  |                   |         |                   |        |                   |         |      |
| GO:0050852                                       |          | 3.7591586958813e-06                                            | 25.3936170212766 |                   |         |                   |        | 0.239775794062695 |         |      |
| 5                                                | 99       | T cell receptor signaling pathway                              |                  |                   |         |                   |        |                   |         |      |
| GO:0051249                                       |          | 4.31125997728482e-06                                           | 12.8079710144928 |                   |         |                   |        | 0.685419694138814 |         |      |
| 7                                                | 283      | regulation of lymphocyte activation                            |                  |                   |         |                   |        |                   |         |      |
| GO:0002253                                       |          | 6.1892885825452e-06                                            | 12.0924657534247 |                   |         |                   |        | 0.724171337623694 |         |      |
| 7                                                | 299      | activation of immune response                                  |                  |                   |         |                   |        |                   |         |      |
| GO:0034341                                       |          | 6.59747971644911e-06                                           | 22.5             | 0.268839526676355 |         |                   | 5      |                   | 111     |      |
|                                                  |          | response to interferon-gamma                                   |                  |                   |         |                   |        |                   |         |      |
| GO:0046649                                       |          | 7.03762282738726e-06                                           | 9.75407407407407 |                   |         |                   |        | 1.04871635180956  |         |      |
| 8                                                | 433      | lymphocyte activation                                          |                  |                   |         |                   |        |                   |         |      |
| GO:0002694                                       |          | 9.84499468954118e-06                                           | 11.2277070063694 |                   |         |                   |        | 0.777454847415404 |         |      |
| 7                                                | 321      | regulation of leukocyte activation                             |                  |                   |         |                   |        |                   |         |      |
| GO:0019221                                       |          | 1.45796365421009e-05                                           | 10.5404191616766 |                   |         |                   |        | 0.825894401771504 |         |      |
| 7                                                | 341      | cytokine-mediated signaling pathway                            |                  |                   |         |                   |        |                   |         |      |
| Tissue: Skin_Sun_Exposed_Lower_leg=>Nerve_Tibial |          |                                                                |                  |                   |         |                   |        | Type: asymmetric  |         |      |
| SourceGene:                                      |          | RP11-83A16.1(ENSG00000235096.1)                                |                  |                   |         |                   |        |                   |         |      |
| TargetGeneSet:                                   |          | C1QC                                                           | C1QB             | LAPTM5            | CD53    | FCGR1A            | CTSS   | FCER1G            | FCGR3A  |      |
| ARL4C                                            | MIR135A1 |                                                                | RP11             | SIDT1             | HCLS1   | FYB               | CSF1R  | HAVCR2            | LY86    |      |
| GPSM3                                            | TREM2    | FAM26F                                                         | TRMT11           | VNN2              | TBXAS1  | CTSB              | MRC1   | FAM86GP           | LDHAL6A |      |
| MS4A7                                            | FOLR2    | KCNE3                                                          | SLCO2B1          | PTPN6             | C3AR1   | P2RX4             | LCPI   | ARL11             | GPR183  |      |
| SERPINA1                                         |          | GOLGA8J                                                        | DPEP3            | DPEP2             | ARRB2   | CD300A            | RHBDF2 | DSC2              | VAV1    | EMR1 |
| STXBP2                                           | IL12RB1  | IFI30                                                          | PDE4C            | LRRC25            | HCST    | SIGLEC9           | FPR3   | SIRPB1            | HCK     |      |
| RPS3P2                                           | ITGB2    | NFAM1                                                          | TLR8             | RP1               | WAS     |                   |        |                   |         |      |
| GOBPID                                           | Pvalue   | OddsRatio                                                      | ExpCount         | Count             | Size    | Term              |        |                   |         |      |
| GO:0050778                                       |          | 9.68765605504039e-07                                           | 8.81481481481481 |                   |         | 1.38537125458446  |        |                   |         |      |
| 10                                               | 364      | positive regulation of immune response                         |                  |                   |         |                   |        |                   |         |      |
| GO:0002252                                       |          | 1.64707071475623e-06                                           | 8.28605200945626 |                   |         | 1.46910248425714  |        |                   |         |      |
| 10                                               | 386      | immune effector process                                        |                  |                   |         |                   |        |                   |         |      |
| GO:0002250                                       |          | 9.48230441307929e-06                                           | 10.8458769633508 |                   |         | 0.753581067054183 |        |                   |         |      |
| 7                                                | 198      | adaptive immune response                                       |                  |                   |         |                   |        |                   |         |      |
| GO:0002443                                       |          | 1.43434834545748e-05                                           | 10.1454248366013 |                   |         | 0.803058611860771 |        |                   |         |      |
| 7                                                | 211      | leukocyte mediated immunity                                    |                  |                   |         |                   |        |                   |         |      |
| GO:0002253                                       |          | 1.60009015720984e-05                                           | 8.25034729838415 |                   |         | 1.13798353055152  |        |                   |         |      |
| 8                                                | 299      | activation of immune response                                  |                  |                   |         |                   |        |                   |         |      |
| Tissue: Skin_Sun_Exposed_Lower_leg=>Nerve_Tibial |          |                                                                |                  |                   |         |                   |        | Type: asymmetric  |         |      |
| SourceGene:                                      |          | RP11-84C10.4(ENSG00000258471.1)                                |                  |                   |         |                   |        |                   |         |      |
| TargetGeneSet:                                   |          | RPL11                                                          | GPR161           | KRT18P12          | C2orf63 | RPL31             | RPL32  | RHOA              |         |      |
| FAM162A                                          | RPL37    | IL6ST                                                          | CAMLG            | PCDHB5            | RPL10A  | RPL39P3           | SSPO   | RPS20             | RPL30   | RP11 |
| S1PR3                                            | RPL12    | ARFIP2                                                         | RPS25            | PFDN5             | RPL41   | PARP2             | DLST   | RPS15A            | RPL17   |      |
| RPL19                                            | ACLY     | CTD                                                            | UBA52            | IGBP1             |         |                   |        |                   |         |      |
| GOBPID                                           | Pvalue   | OddsRatio                                                      | ExpCount         | Count             | Size    | Term              |        |                   |         |      |
| GO:0006415                                       |          | 3.89347974264337e-24                                           | 173.878787878788 |                   |         | 0.182617119922497 |        |                   |         |      |
| 14                                               | 91       | translational termination                                      |                  |                   |         |                   |        |                   |         |      |
| GO:0006414                                       |          | 3.29879799035074e-23                                           | 146.984615384615 |                   |         | 0.210712061449035 |        |                   |         |      |
| 14                                               | 105      | translational elongation                                       |                  |                   |         |                   |        |                   |         |      |
| GO:0006614                                       |          | 3.29879799035074e-23                                           | 146.984615384615 |                   |         | 0.210712061449035 |        |                   |         |      |
| 14                                               | 105      | SRP-dependent cotranslational protein targeting to membrane    |                  |                   |         |                   |        |                   |         |      |
| GO:0006613                                       |          | 3.79708282379369e-23                                           | 145.376811594203 |                   |         | 0.212718842986645 |        |                   |         |      |
| 14                                               | 106      | cotranslational protein targeting to membrane                  |                  |                   |         |                   |        |                   |         |      |
| GO:0045047                                       |          | 3.79708282379369e-23                                           | 145.376811594203 |                   |         | 0.212718842986645 |        |                   |         |      |
| 14                                               | 106      | protein targeting to ER                                        |                  |                   |         |                   |        |                   |         |      |
| GO:0072599                                       |          | 3.79708282379369e-23                                           | 145.376811594203 |                   |         | 0.212718842986645 |        |                   |         |      |
| 14                                               | 106      | establishment of protein localization to endoplasmic reticulum |                  |                   |         |                   |        |                   |         |      |
| GO:0070972                                       |          | 1.85228473059208e-22                                           | 128.494871794872 |                   |         | 0.236800221437963 |        |                   |         |      |

Stable4\_20PerPair

|                                                  |        |                                                                     |                  |                   |          |                  |          |        |        |      |
|--------------------------------------------------|--------|---------------------------------------------------------------------|------------------|-------------------|----------|------------------|----------|--------|--------|------|
| 14                                               | 118    | protein localization to endoplasmic reticulum                       |                  |                   |          |                  |          |        |        |      |
| GO:0000184                                       |        | 2.09720741435729e-22                                                | 127.262222222222 | 0.238807002975573 |          |                  |          |        |        |      |
| 14                                               | 119    | nuclear-transcribed mRNA catabolic process, nonsense-mediated decay |                  |                   |          |                  |          |        |        |      |
| GO:0019080                                       |        | 6.78599757980201e-21                                                | 97.3187347931873 | 0.303024012179088 |          |                  |          |        |        |      |
| 14                                               | 151    | viral genome expression                                             |                  |                   |          |                  |          |        |        |      |
| GO:0019083                                       |        | 6.78599757980201e-21                                                | 97.3187347931873 | 0.303024012179088 |          |                  |          |        |        |      |
| 14                                               | 151    | viral transcription                                                 |                  |                   |          |                  |          |        |        |      |
| GO:0006413                                       |        | 7.46712331646782e-21                                                | 96.6067632850242 | 0.305030793716698 |          |                  |          |        |        |      |
| 14                                               | 152    | translational initiation                                            |                  |                   |          |                  |          |        |        |      |
| GO:0006612                                       |        | 8.21117011725791e-21                                                | 95.905035971223  | 0.307037575254308 | 14       |                  |          |        |        |      |
| 153                                              |        | protein targeting to membrane                                       |                  |                   |          |                  |          |        |        |      |
| GO:0043624                                       |        | 8.21117011725791e-21                                                | 95.905035971223  | 0.307037575254308 | 14       |                  |          |        |        |      |
| 153                                              |        | cellular protein complex disassembly                                |                  |                   |          |                  |          |        |        |      |
| GO:0043241                                       |        | 1.30761493981802e-20                                                | 92.5425925925926 | 0.317071482942357 |          |                  |          |        |        |      |
| 14                                               | 158    | protein complex disassembly                                         |                  |                   |          |                  |          |        |        |      |
| GO:0000956                                       |        | 3.45346379146708e-20                                                | 85.9088172043011 | 0.339146079856065 |          |                  |          |        |        |      |
| 14                                               | 169    | nuclear-transcribed mRNA catabolic process                          |                  |                   |          |                  |          |        |        |      |
| GO:0034623                                       |        | 5.25409965248226e-20                                                | 83.195           | 0.349179987544115 | 14       | 174              |          |        |        |      |
|                                                  |        | cellular macromolecular complex disassembly                         |                  |                   |          |                  |          |        |        |      |
| GO:0006402                                       |        | 7.28396567836956e-20                                                | 81.1430894308943 | 0.357207113694554 |          |                  |          |        |        |      |
| 14                                               | 178    | mRNA catabolic process                                              |                  |                   |          |                  |          |        |        |      |
| GO:0032984                                       |        | 7.89425949776488e-20                                                | 80.6456565656566 | 0.359213895232164 |          |                  |          |        |        |      |
| 14                                               | 179    | macromolecular complex disassembly                                  |                  |                   |          |                  |          |        |        |      |
| GO:0072594                                       |        | 5.12801761457407e-19                                                | 69.9115789473684 | 0.40938343367241  |          |                  |          |        |        |      |
| 14                                               | 204    | establishment of protein localization to organelle                  |                  |                   |          |                  |          |        |        |      |
| GO:0006401                                       |        | 5.49849388107925e-19                                                | 69.5406631762653 | 0.41139021521002  |          |                  |          |        |        |      |
| 14                                               | 205    | RNA catabolic process                                               |                  |                   |          |                  |          |        |        |      |
| GO:0019058                                       |        | 3.00474331921092e-18                                                | 61.0967741935484 | 0.463566535187876 |          |                  |          |        |        |      |
| 14                                               | 231    | viral infectious cycle                                              |                  |                   |          |                  |          |        |        |      |
| GO:0022415                                       |        | 1.60062313346179e-17                                                | 53.7842818428184 | 0.521763199778562 |          |                  |          |        |        |      |
| 14                                               | 260    | viral reproductive process                                          |                  |                   |          |                  |          |        |        |      |
| GO:0071845                                       |        | 5.54797086712677e-17                                                | 48.9204938271605 | 0.569925956681198 |          |                  |          |        |        |      |
| 14                                               | 284    | cellular component disassembly at cellular level                    |                  |                   |          |                  |          |        |        |      |
| GO:0022411                                       |        | 6.75234286321892e-17                                                | 48.192700729927  | 0.577953082831638 | 14       |                  |          |        |        |      |
| 288                                              |        | cellular component disassembly                                      |                  |                   |          |                  |          |        |        |      |
| GO:0033365                                       |        | 2.16924871329741e-15                                                | 32.666874610106  | 0.949207667289461 | 15       |                  |          |        |        |      |
| 473                                              |        | protein localization to organelle                                   |                  |                   |          |                  |          |        |        |      |
| GO:0006605                                       |        | 2.23804350974266e-15                                                | 32.593370681606  | 0.951214448827071 | 15       |                  |          |        |        |      |
| 474                                              |        | protein targeting                                                   |                  |                   |          |                  |          |        |        |      |
| GO:0016032                                       |        | 3.44467018415915e-14                                                | 29.8688024408848 | 0.905058473462044 |          |                  |          |        |        |      |
| 14                                               | 451    | viral reproduction                                                  |                  |                   |          |                  |          |        |        |      |
| Tissue: Nerve_Tibial=>Skin_Sun_Exposed_Lower_leg |        |                                                                     | Type:            | cluster           |          |                  |          |        |        |      |
| SourceGene: SPATA25(ENSG00000149634.4)           |        |                                                                     |                  |                   |          |                  |          |        |        |      |
| TargetGeneSet:                                   |        |                                                                     | RP4              | C1orf170          | CDC20    | KIF2C            | ORC1     | DEPDC1 | FAM72D | MTX1 |
| IQGAP3                                           | NUF2   | ASPM                                                                | CENPF            | DPYSL5            | NCAPH    | BUB1             | TUBA4A   | SPHKAP | HJURP  |      |
| ITPR1                                            | CRELD1 | KIF15                                                               | WNT5A            | SETP14            | EIF4A2   | TACC3            | NCAPG    | CCNA2  | PCDH10 |      |
| HMGB2                                            | BRCC3  | CCNB1                                                               | ZFYVE16          | FAM13B            | KIF20A   | CDC25C           | KIAA1191 |        | PBK    |      |
| ZBTB34                                           | ZWINT  | CDK1                                                                | HNRNPH3          | KIF11             | FAM160B1 |                  | C10orf46 |        | MKI67  | E2F8 |
| STIP1                                            | CDCA5  | YAP1                                                                | CACNA2D4         |                   | FKBP4    | TROAP            | MBD6     | E2F7   | ZNF891 |      |
| DIAPH3                                           | DLGAP5 | SLC8A3                                                              | AHSA1            | BUB1B             | CASC5    | NUSAP1           | CCNB2    | KIF23  | NPTN   |      |
| C15orf42                                         |        | UNC45A                                                              | PRC1             | SYNM              | RP11     | HBA2             | HBA1     | PLK1   | AARS   |      |
| AURKB                                            | CDC6   | NKIRAS2                                                             | PRPSAP1          | BIRC5             | RP13     | NDC80            | SKA1     | GNG7   | CADM4  | TPX2 |
| UBE2C                                            | AURKA  | C21orf58                                                            |                  | GTSE1             | KIF4A    |                  |          |        |        |      |
| GOBPID                                           | Pvalue | OddsRatio                                                           | ExpCount         | Count             | Size     | Term             |          |        |        |      |
| GO:0000087                                       |        | 5.0847274738295e-32                                                 | 29.5246559633028 | 29.5246559633028  |          | 2.01785343574839 |          |        |        |      |
| 33                                               | 360    | M phase of mitotic cell cycle                                       |                  |                   |          |                  |          |        |        |      |
| GO:0000280                                       |        | 5.91476317426276e-31                                                | 28.8579129765114 | 28.8579129765114  |          | 1.96180195142205 |          |        |        |      |
| 32                                               | 350    | nuclear division                                                    |                  |                   |          |                  |          |        |        |      |
| GO:0007067                                       |        | 5.91476317426276e-31                                                | 28.8579129765114 | 28.8579129765114  |          | 1.96180195142205 |          |        |        |      |
| 32                                               | 350    | mitosis                                                             |                  |                   |          |                  |          |        |        |      |
| GO:0048285                                       |        | 3.55039377299656e-30                                                | 27.1117014853279 | 27.1117014853279  |          | 2.07390492007474 |          |        |        |      |
| 32                                               | 370    | organelle fission                                                   |                  |                   |          |                  |          |        |        |      |
| GO:0051301                                       |        | 4.47473727085696e-26                                                | 20.5424703087886 | 20.5424703087886  |          | 2.53352709155076 |          |        |        |      |

STable4\_20PerPair

|            |     |                                                                                                |                  |                   |                   |    |    |
|------------|-----|------------------------------------------------------------------------------------------------|------------------|-------------------|-------------------|----|----|
| 31         | 452 | cell division                                                                                  |                  |                   |                   |    |    |
| GO:0010564 |     | 9.39408493606754e-21                                                                           | 17.0352389878163 |                   | 2.32053145111065  |    |    |
| 26         | 414 | regulation of cell cycle process                                                               |                  |                   |                   |    |    |
| GO:0007017 |     | 4.45654204773914e-20                                                                           | 16.9861218944099 |                   | 2.20282333402533  |    |    |
| 25         | 393 | microtubule-based process                                                                      |                  |                   |                   |    |    |
| GO:0007059 |     | 5.01608028890097e-20                                                                           | 33.367681498829  | 0.784720780568819 |                   | 18 |    |
| 140        |     | chromosome segregation                                                                         |                  |                   |                   |    |    |
| GO:0000226 |     | 2.09231203884606e-17                                                                           | 18.5937191388505 |                   | 1.50778492837866  |    |    |
| 20         | 269 | microtubule cytoskeleton organization                                                          |                  |                   |                   |    |    |
| GO:0000236 |     | 2.5768957809755e-17                                                                            | 42.0824048770233 |                   | 0.476437616773926 |    |    |
| 14         | 85  | mitotic prometaphase                                                                           |                  |                   |                   |    |    |
| GO:0000075 |     | 1.01798615418588e-15                                                                           | 18.0433673469388 |                   | 1.35644592069753  |    |    |
| 18         | 242 | cell cycle checkpoint                                                                          |                  |                   |                   |    |    |
| GO:0007346 |     | 3.43616833472551e-15                                                                           | 15.19956837801   | 1.69835997508823  |                   | 19 |    |
| 303        |     | regulation of mitotic cell cycle                                                               |                  |                   |                   |    |    |
| GO:0071156 |     | 4.69716445293593e-15                                                                           | 16.404181184669  | 1.47975918621549  |                   | 18 |    |
| 264        |     | regulation of cell cycle arrest                                                                |                  |                   |                   |    |    |
| GO:0007051 |     | 1.82947026663233e-14                                                                           | 36.5780051150895 |                   | 0.448411874610754 |    |    |
| 12         | 80  | spindle organization                                                                           |                  |                   |                   |    |    |
| GO:0007050 |     | 1.48551154839294e-12                                                                           | 11.4114774114774 |                   | 2.0682997716421   | 18 |    |
| 369        |     | cell cycle arrest                                                                              |                  |                   |                   |    |    |
| GO:0007088 |     | 1.92177534431201e-12                                                                           | 29.169387755102  | 0.493253062071829 |                   | 11 |    |
| 88         |     | regulation of mitosis                                                                          |                  |                   |                   |    |    |
| GO:0051783 |     | 1.92177534431201e-12                                                                           | 29.169387755102  | 0.493253062071829 |                   | 11 |    |
| 88         |     | regulation of nuclear division                                                                 |                  |                   |                   |    |    |
| GO:0045786 |     | 2.50036875731423e-11                                                                           | 9.51312649164678 |                   | 2.44944986506124  |    |    |
| 18         | 437 | negative regulation of cell cycle                                                              |                  |                   |                   |    |    |
| GO:0031577 |     | 6.91910766519952e-11                                                                           | 46.2078968573731 |                   | 0.235416234170646 |    |    |
| 8          | 42  | spindle checkpoint                                                                             |                  |                   |                   |    |    |
| GO:0000070 |     | 2.56165649153333e-10                                                                           | 38.300033411293  | 0.274652273199087 |                   | 8  |    |
| 49         |     | mitotic sister chromatid segregation                                                           |                  |                   |                   |    |    |
| GO:0051329 |     | 2.5981955340301e-10                                                                            | 9.49828353464717 |                   | 2.12435125596844  |    |    |
| 16         | 379 | interphase of mitotic cell cycle                                                               |                  |                   |                   |    |    |
| GO:0007093 |     | 2.98659727102064e-10                                                                           | 17.4845982142857 |                   | 0.779115632136184 |    |    |
| 11         | 139 | mitotic cell cycle checkpoint                                                                  |                  |                   |                   |    |    |
| GO:0051325 |     | 3.52951857411441e-10                                                                           | 9.28816089570807 |                   | 2.16919244342952  |    |    |
| 16         | 387 | interphase                                                                                     |                  |                   |                   |    |    |
| GO:0000819 |     | 4.21721831072271e-10                                                                           | 35.681195516812  | 0.29146771849699  |                   | 8  |    |
| 52         |     | sister chromatid segregation                                                                   |                  |                   |                   |    |    |
| GO:0000086 |     | 4.37089679068325e-10                                                                           | 16.8213748657358 |                   | 0.807141374299356 |    |    |
| 11         | 144 | G2/M transition of mitotic cell cycle                                                          |                  |                   |                   |    |    |
| GO:0007052 |     | 5.06895725025873e-10                                                                           | 52.1871101871102 |                   | 0.184969898276936 |    |    |
| 7          | 33  | mitotic spindle organization                                                                   |                  |                   |                   |    |    |
| GO:0090068 |     | 7.27458579217874e-10                                                                           | 15.9724489795918 |                   | 0.846377413327797 |    |    |
| 11         | 151 | positive regulation of cell cycle process                                                      |                  |                   |                   |    |    |
| GO:0033043 |     | 2.34798653977427e-09                                                                           | 8.07674208144796 |                   | 2.47187045879178  |    |    |
| 16         | 441 | regulation of organelle organization                                                           |                  |                   |                   |    |    |
| GO:0051983 |     | 3.19035394030749e-09                                                                           | 63.7866666666667 |                   | 0.134523562383226 |    |    |
| 6          | 24  | regulation of chromosome segregation                                                           |                  |                   |                   |    |    |
| GO:0030071 |     | 3.6555912191931e-09                                                                            | 37.6644144144144 |                   | 0.24102138260328  |    |    |
| 7          | 43  | regulation of mitotic metaphase/anaphase transition                                            |                  |                   |                   |    |    |
| GO:0007091 |     | 5.10195485306002e-09                                                                           | 35.6770981507824 |                   | 0.252231679468549 |    |    |
| 7          | 45  | mitotic metaphase/anaphase transition                                                          |                  |                   |                   |    |    |
| GO:0030261 |     | 1.37029512037098e-08                                                                           | 47.82            | 0.168154452979033 |                   | 6  | 30 |
|            |     | chromosome condensation                                                                        |                  |                   |                   |    |    |
| GO:0031145 |     | 1.9223468939349e-08                                                                            | 20.8876712328767 |                   | 0.465227319908657 |    |    |
| 8          | 83  | anaphase-promoting complex-dependent proteasomal ubiquitin-dependent protein catabolic process |                  |                   |                   |    |    |
| GO:0071173 |     | 3.04889055198969e-08                                                                           | 40.9771428571429 |                   | 0.19057504670957  |    |    |
| 6          | 34  | spindle assembly checkpoint                                                                    |                  |                   |                   |    |    |
| GO:0071174 |     | 4.37645745520425e-08                                                                           | 38.24            | 0.201785343574839 |                   | 6  | 36 |
|            |     | mitotic cell cycle spindle checkpoint                                                          |                  |                   |                   |    |    |
| GO:0000910 |     | 5.16292071265058e-08                                                                           | 18.2019751513221 |                   | 0.526883952667635 |    |    |

STable4\_20PerPair

|                                                     |     |                                                                                |                  |                   |  |                    |    |
|-----------------------------------------------------|-----|--------------------------------------------------------------------------------|------------------|-------------------|--|--------------------|----|
| 8                                                   | 94  | cytokinesis                                                                    |                  |                   |  |                    |    |
| GO:0050000                                          |     | 9.26031690678646e-08                                                           | 59.0213815789474 |                   |  | 0.117708117085323  |    |
| 5                                                   | 21  | chromosome localization                                                        |                  |                   |  |                    |    |
| GO:0051303                                          |     | 9.26031690678646e-08                                                           | 59.0213815789474 |                   |  | 0.117708117085323  |    |
| 5                                                   | 21  | establishment of chromosome localization                                       |                  |                   |  |                    |    |
| GO:0034502                                          |     | 1.51789880148426e-07                                                           | 52.4561403508772 |                   |  | 0.128918413950592  |    |
| 5                                                   | 23  | protein localization to chromosome                                             |                  |                   |  |                    |    |
| GO:0051640                                          |     | 1.51824571807191e-07                                                           | 12.6143617021277 |                   |  | 0.840772264895163  |    |
| 9                                                   | 150 | organelle localization                                                         |                  |                   |  |                    |    |
| GO:0006323                                          |     | 1.79885415492457e-07                                                           | 12.3489583333333 |                   |  | 0.857587710193066  |    |
| 9                                                   | 153 | DNA packaging                                                                  |                  |                   |  |                    |    |
| GO:0033205                                          |     | 5.21782332135302e-07                                                           | 39.3256578947368 |                   |  | 0.162549304546398  |    |
| 5                                                   | 29  | cell cycle cytokinesis                                                         |                  |                   |  |                    |    |
| GO:0010389                                          |     | 6.23398208321624e-07                                                           | 37.75            | 0.168154452979033 |  | 5                  | 30 |
| regulation of G2/M transition of mitotic cell cycle |     |                                                                                |                  |                   |  |                    |    |
| GO:0007076                                          |     | 6.30228466653901e-07                                                           | 82.8917748917749 |                   |  | 0.0728669296242475 |    |
| 4                                                   | 13  | mitotic chromosome condensation                                                |                  |                   |  |                    |    |
| GO:0007094                                          |     | 1.02466434659373e-06                                                           | 33.6983082706767 |                   |  | 0.184969898276936  |    |
| 5                                                   | 33  | mitotic cell cycle spindle assembly checkpoint                                 |                  |                   |  |                    |    |
| GO:0010948                                          |     | 1.06582718270912e-06                                                           | 15.1787124202855 |                   |  | 0.538094249532904  |    |
| 7                                                   | 96  | negative regulation of cell cycle process                                      |                  |                   |  |                    |    |
| GO:0071103                                          |     | 1.07300540491188e-06                                                           | 9.85416666666667 |                   |  | 1.05937305376791   |    |
| 9                                                   | 189 | DNA conformation change                                                        |                  |                   |  |                    |    |
| GO:0007018                                          |     | 1.25327483367243e-06                                                           | 11.642608873441  | 0.795931077434088 |  |                    | 8  |
| 142                                                 |     | microtubule-based movement                                                     |                  |                   |  |                    |    |
| GO:0045841                                          |     | 1.38931399792082e-06                                                           | 31.4473684210526 |                   |  | 0.196180195142205  |    |
| 5                                                   | 35  | negative regulation of mitotic metaphase/anaphase transition                   |                  |                   |  |                    |    |
| GO:0051656                                          |     | 1.5038836713339e-06                                                            | 14.3663024726855 |                   |  | 0.566119991696076  |    |
| 7                                                   | 101 | establishment of organelle localization                                        |                  |                   |  |                    |    |
| GO:0045787                                          |     | 1.60746686796036e-06                                                           | 14.2140825035562 |                   |  | 0.571725140128711  |    |
| 7                                                   | 102 | positive regulation of cell cycle                                              |                  |                   |  |                    |    |
| GO:0008608                                          |     | 2.06231748342511e-06                                                           | 57.3706293706294 |                   |  | 0.0952875233547851 |    |
| 4                                                   | 17  | attachment of spindle microtubules to kinetochore                              |                  |                   |  |                    |    |
| GO:0045839                                          |     | 2.75499188362075e-06                                                           | 26.9454887218045 |                   |  | 0.224205937305377  |    |
| 5                                                   | 40  | negative regulation of mitosis                                                 |                  |                   |  |                    |    |
| GO:0051784                                          |     | 2.75499188362075e-06                                                           | 26.9454887218045 |                   |  | 0.224205937305377  |    |
| 5                                                   | 40  | negative regulation of nuclear division                                        |                  |                   |  |                    |    |
| GO:0051313                                          |     | 3.33009793296381e-06                                                           | 49.7142857142857 |                   |  | 0.106497820220054  |    |
| 4                                                   | 19  | attachment of spindle microtubules to chromosome                               |                  |                   |  |                    |    |
| GO:0034501                                          |     | 3.35230564627903e-06                                                           | 184.192307692308 |                   |  | 0.0336308905958065 |    |
| 3                                                   | 6   | protein localization to kinetochore                                            |                  |                   |  |                    |    |
| GO:0051439                                          |     | 4.78685095042972e-06                                                           | 15.8866666666667 |                   |  | 0.437201577745485  |    |
| 6                                                   | 78  | regulation of ubiquitin-protein ligase activity involved in mitotic cell cycle |                  |                   |  |                    |    |
| GO:0051488                                          |     | 5.84279665726836e-06                                                           | 138.134615384615 |                   |  | 0.0392360390284409 |    |
| 3                                                   | 7   | activation of anaphase-promoting complex activity                              |                  |                   |  |                    |    |
| GO:0000079                                          |     | 6.87961998116735e-06                                                           | 14.8498701298701 |                   |  | 0.465227319908657  |    |
| 6                                                   | 83  | regulation of cyclin-dependent protein kinase activity                         |                  |                   |  |                    |    |
| GO:0032886                                          |     | 1.17246328134062e-05                                                           | 13.4447058823529 |                   |  | 0.510068507369732  |    |
| 6                                                   | 91  | regulation of microtubule-based process                                        |                  |                   |  |                    |    |
| GO:0051438                                          |     | 1.5947979052682e-05                                                            | 12.6933333333333 |                   |  | 0.538094249532904  |    |
| 6                                                   | 96  | regulation of ubiquitin-protein ligase activity                                |                  |                   |  |                    |    |

Tissue: Skin\_Sun\_Exposed\_Lower\_leg=>Nerve\_Tibial Type: asymmetric

SourceGene: TSC1(ENSG00000165699.6)

|                |         |          |         |          |          |         |          |          |           |
|----------------|---------|----------|---------|----------|----------|---------|----------|----------|-----------|
| TargetGeneSet: | C1QC    | C1QB     | RPS6KA1 | PPCS     | FCGR1B   | FAM72D  | SEMA4A   | C1orf85  |           |
| SLAMF8         | CD84    | ARHGAP30 | TMEM81  | OR2L3    | GPN1     | PKDCC   | ARHGAP25 | GPX1     |           |
| UBA7           | STX18   | TLR1     | TLR6    | LIAS     | DAPP1    | ANKDD1B | XRCC4    | SLC25A46 | SNX2      |
| SLU7           | RP11    | DDX41    | F13A1   | LST1     | AIF1     | GPANK1  | HSPA1B   | GPSM3    | FGD2      |
| CYB5R4         | ZC3H12D | C6orf97  | MKRN1   | MRPS33   | DOK2     | FAM49B  | SYK      | TRIM14   | NDUFA8    |
| FAM78A         | FCN1    | ACBD5    | PIK3AP1 | COMMD9   | MS4A6A   | LAMTOR1 | SLCO2B1  | VPS11    | PTPN6     |
| ARHGDI8        | PTPRO   | LRMP     | NR4A1   | NCKAP1L  | TMEM194A |         | ERP29    | DENR     | LCPI      |
| ARL11          | NLRC3   | NAGPA    | CORO1A  | DUS2L    | FANCA    | DBIL5P  | ADAP2    | CDR2L    | TNFRSF11A |
| VPS4B          | EBI3    | VAV1     | STXBP2  | C19orf40 |          | POU2F2  | SIGLEC10 |          | CTD       |

Stable4\_20PerPair

| LAIR1            | SIRPG                                                 | GIN51                                                                                                            | HCK | PLTP             | ITGB2 | TXNRD2           | C22orf25 | BCR                |
|------------------|-------------------------------------------------------|------------------------------------------------------------------------------------------------------------------|-----|------------------|-------|------------------|----------|--------------------|
| SLC2A11          | RAC2                                                  | C22orf40                                                                                                         |     | TLR7             | CYBB  | GPR34            | WAS      | ARHGAP4            |
| GOBPID           | Pvalue                                                | OddsRatio                                                                                                        |     | ExpCount         |       | Count            | Size     | Term               |
| GO:0006909       |                                                       | 1.56187313052746e-09                                                                                             |     | 22.2701298701299 |       | 2299             | 14       | 0.499896200954951  |
| 9                | 86                                                    | phagocytosis                                                                                                     |     |                  |       |                  |          |                    |
| GO:0050900       |                                                       | 1.37690707673575e-08                                                                                             |     | 10.2896652110626 |       | 110626           | 14       | 1.40087191197841   |
| 12               | 241                                                   | leukocyte migration                                                                                              |     |                  |       |                  |          |                    |
| GO:0042110       |                                                       | 3.54707280255418e-08                                                                                             |     | 8.41355979011323 |       | 11323            | 14       | 1.85426614075151   |
| 13               | 319                                                   | T cell activation                                                                                                |     |                  |       |                  |          |                    |
| GO:0002252       |                                                       | 4.32196566570316e-08                                                                                             |     | 7.5241935483871  |       | 2.24372015777455 | 14       |                    |
| 386              | immune                                                | effector process                                                                                                 |     |                  |       |                  |          |                    |
| GO:0046649       |                                                       | 1.78450638055667e-07                                                                                             |     | 6.65775656324582 |       | 24582            | 14       | 2.51691924434295   |
| 14               | 433                                                   | lymphocyte activation                                                                                            |     |                  |       |                  |          |                    |
| GO:0002250       |                                                       | 2.12684226820067e-07                                                                                             |     | 10.1919206440483 |       | 40483            | 14       | 1.15092381150093   |
| 10               | 198                                                   | adaptive immune response                                                                                         |     |                  |       |                  |          |                    |
| GO:0002263       |                                                       | 5.56195940913319e-07                                                                                             |     | 13.0453089244851 |       | 44851            | 14       | 0.714967822296035  |
| 8                | 123                                                   | cell activation involved in immune response                                                                      |     |                  |       |                  |          |                    |
| GO:0002366       |                                                       | 5.56195940913319e-07                                                                                             |     | 13.0453089244851 |       | 44851            | 14       | 0.714967822296035  |
| 8                | 123                                                   | leukocyte activation involved in immune response                                                                 |     |                  |       |                  |          |                    |
| GO:0060326       |                                                       | 1.19580713977144e-06                                                                                             |     | 11.7097039473684 |       | 73684            | 14       | 0.790533527091551  |
| 8                | 136                                                   | cell chemotaxis                                                                                                  |     |                  |       |                  |          |                    |
| GO:0002253       |                                                       | 1.20183616994373e-06                                                                                             |     | 7.36629566210046 |       | 10046            | 14       | 1.73801121029687   |
| 11               | 299                                                   | activation of immune response                                                                                    |     |                  |       |                  |          |                    |
| GO:0050778       |                                                       | 1.20317321759012e-06                                                                                             |     | 6.63589015151515 |       | 151515           | 14       | 2.11583973427444   |
| 12               | 364                                                   | positive regulation of immune response                                                                           |     |                  |       |                  |          |                    |
| GO:0002764       |                                                       | 1.67589937093668e-06                                                                                             |     | 8.02237111060641 |       | 60641            | 14       | 1.44156113763753   |
| 10               | 248                                                   | immune response-regulating signaling pathway                                                                     |     |                  |       |                  |          |                    |
| GO:0050764       |                                                       | 2.53995359159108e-06                                                                                             |     | 27.4913693901036 |       | 1036             | 14       | 0.220884367863816  |
| 5                | 38                                                    | regulation of phagocytosis                                                                                       |     |                  |       |                  |          |                    |
| GO:0030595       |                                                       | 3.62929556025758e-06                                                                                             |     | 12.4676573426573 |       | 6573             | 14       | 0.645214864023251  |
| 7                | 111                                                   | leukocyte chemotaxis                                                                                             |     |                  |       |                  |          |                    |
| GO:0050865       |                                                       | 4.53592914436223e-06                                                                                             |     | 6.37006931836937 |       | 6937             | 14       | 1.99377205729707   |
| 11               | 343                                                   | regulation of cell activation                                                                                    |     |                  |       |                  |          |                    |
| GO:0050870       |                                                       | 6.62202013862449e-06                                                                                             |     | 9.17274782047142 |       | 7142             | 14       | 0.99397965538717   |
| 8                | 171                                                   | positive regulation of T cell activation                                                                         |     |                  |       |                  |          |                    |
| GO:0002275       |                                                       | 6.68814015747244e-06                                                                                             |     | 22.1148502624267 |       | 24267            | 14       | 0.267386340045672  |
| 5                | 46                                                    | myeloid cell activation involved in immune response                                                              |     |                  |       |                  |          |                    |
| GO:0002886       |                                                       | 8.64650380938989e-06                                                                                             |     | 37.7578947368421 |       | 7368421          | 14       | 0.133693170022836  |
| 4                | 23                                                    | regulation of myeloid leukocyte mediated immunity                                                                |     |                  |       |                  |          |                    |
| GO:0002757       |                                                       | 8.70612819212225e-06                                                                                             |     | 7.50849557522124 |       | 22124            | 14       | 1.36599543284202   |
| 9                | 235                                                   | immune response-activating signal transduction                                                                   |     |                  |       |                  |          |                    |
| GO:0002460       |                                                       | 1.00493545434512e-05                                                                                             |     | 8.6364466078491  |       | 1.05210712061449 | 8        |                    |
| 181              | adaptive                                              | immune response based on somatic recombination of immune receptors built from immunoglobulin superfamily domains |     |                  |       |                  |          |                    |
| GO:0050867       |                                                       | 1.03118971907143e-05                                                                                             |     | 7.34337662337662 |       | 62337662         | 14       | 1.39505916545568   |
| 9                | 240                                                   | positive regulation of cell activation                                                                           |     |                  |       |                  |          |                    |
| GO:0006954       |                                                       | 1.38329207528784e-05                                                                                             |     | 5.15444444444444 |       | 444444           | 14       | 2.68548889350218   |
| 12               | 462                                                   | inflammatory response                                                                                            |     |                  |       |                  |          |                    |
| GO:0001774       |                                                       | 1.55193509925864e-05                                                                                             |     | 88.6481481481482 |       | 1481482          | 14       | 0.0523147187045879 |
| 3                | 9                                                     | microglial cell activation                                                                                       |     |                  |       |                  |          |                    |
| GO:0043312       |                                                       | 1.55193509925864e-05                                                                                             |     | 88.6481481481482 |       | 1481482          | 14       | 0.0523147187045879 |
| 3                | 9                                                     | neutrophil degranulation                                                                                         |     |                  |       |                  |          |                    |
| GO:0002694       |                                                       | 1.63789020496631e-05                                                                                             |     | 6.10758668636482 |       | 636482           | 14       | 1.86589163379697   |
| 10               | 321                                                   | regulation of leukocyte activation                                                                               |     |                  |       |                  |          |                    |
| Tissue: Skin_Sun | Exposed_Lower_leg=>Nerve_Tibial                       |                                                                                                                  |     |                  |       |                  |          | Type: asymmetric   |
| SourceGene:      | WDR75(ENSG00000115368.5)                              |                                                                                                                  |     |                  |       |                  |          |                    |
| TargetGeneSet:   | RPL11 RP11 UBC RPL31 ASNSD1 RPL37A SCARNA6 RPL32      |                                                                                                                  |     |                  |       |                  |          |                    |
| EXOSC7 FAM162A   | IFT80 RPL34 ODZ1 CTD RPL37 RPL10A RPL39P3 MRPS12 SSPO |                                                                                                                  |     |                  |       |                  |          |                    |
| RPL30 RPS6       | RPL12 LCN2 RPS24 MIR1307 RPS13 EIF3M GANAB C11orf67   |                                                                                                                  |     |                  |       |                  |          |                    |
| RPS25 PFDN5      | RPL41 NACA RPS2P5 RPS29 RPL3P4 RPL4 CHD2 RPL17        |                                                                                                                  |     |                  |       |                  |          |                    |
| RPL36 IFNGR2     | C22orf32                                              |                                                                                                                  |     |                  |       |                  |          |                    |
| GOBPID           | Pvalue                                                | OddsRatio                                                                                                        |     | ExpCount         |       | Count            | Size     | Term               |
| GO:0006415       |                                                       | 1.5680139250674e-34                                                                                              |     | 270.410714285714 |       | 285714           | 14       | 0.207805688187669  |



STable4\_20PerPair

|            |     |                                                                     |                  |                    |  |                   |    |     |
|------------|-----|---------------------------------------------------------------------|------------------|--------------------|--|-------------------|----|-----|
| 19         | 91  | translational termination                                           |                  |                    |  |                   |    |     |
| GO:0006414 |     | 3.12909219563623e-33                                                | 226.169435215947 |                    |  | 0.239775794062695 |    |     |
| 19         | 105 | translational elongation                                            |                  |                    |  |                   |    |     |
| GO:0006614 |     | 3.12909219563623e-33                                                | 226.169435215947 |                    |  | 0.239775794062695 |    |     |
| 19         | 105 | SRP-dependent cotranslational protein targeting to membrane         |                  |                    |  |                   |    |     |
| GO:0006613 |     | 3.80892439741973e-33                                                | 223.554187192118 |                    |  | 0.242059373053768 |    |     |
| 19         | 106 | cotranslational protein targeting to membrane                       |                  |                    |  |                   |    |     |
| GO:0045047 |     | 3.80892439741973e-33                                                | 223.554187192118 |                    |  | 0.242059373053768 |    |     |
| 19         | 106 | protein targeting to ER                                             |                  |                    |  |                   |    |     |
| GO:0072599 |     | 3.80892439741973e-33                                                | 223.554187192118 |                    |  | 0.242059373053768 |    |     |
| 19         | 106 | establishment of protein localization to endoplasmic reticulum      |                  |                    |  |                   |    |     |
| GO:0070972 |     | 3.47664674423231e-32                                                | 196.292207792208 |                    |  | 0.269462320946647 |    |     |
| 19         | 118 | protein localization to endoplasmic reticulum                       |                  |                    |  |                   |    |     |
| GO:0006413 |     | 3.85299653365757e-32                                                | 166.503496503497 |                    |  | 0.347104006643139 |    |     |
| 20         | 152 | translational initiation                                            |                  |                    |  |                   |    |     |
| GO:0000184 |     | 4.13337274621525e-32                                                | 194.315714285714 |                    |  | 0.271745899937721 |    |     |
| 19         | 119 | nuclear-transcribed mRNA catabolic process, nonsense-mediated decay |                  |                    |  |                   |    |     |
| GO:0000956 |     | 3.62877134318008e-31                                                | 147.330924109448 |                    |  | 0.385924849491385 |    |     |
| 20         | 169 | nuclear-transcribed mRNA catabolic process                          |                  |                    |  |                   |    |     |
| GO:0006402 |     | 1.08080495844364e-30                                                | 138.851022395326 |                    |  | 0.406477060411044 |    |     |
| 20         | 178 | mRNA catabolic process                                              |                  |                    |  |                   |    |     |
| GO:0019080 |     | 5.18226236288466e-30                                                | 146.87987012987  | 0.344820427652066  |  |                   | 19 |     |
| 151        |     | viral genome expression                                             |                  |                    |  |                   |    |     |
| GO:0019083 |     | 5.18226236288466e-30                                                | 146.87987012987  | 0.344820427652066  |  |                   | 19 |     |
| 151        |     | viral transcription                                                 |                  |                    |  |                   |    |     |
| GO:0006612 |     | 6.74979111260142e-30                                                | 144.667377398721 |                    |  | 0.349387585634212 |    |     |
| 19         | 153 | protein targeting to membrane                                       |                  |                    |  |                   |    |     |
| GO:0043624 |     | 6.74979111260142e-30                                                | 144.667377398721 |                    |  | 0.349387585634212 |    |     |
| 19         | 153 | cellular protein complex disassembly                                |                  |                    |  |                   |    |     |
| GO:0043241 |     | 1.2862263367654e-29                                                 | 139.414696813977 |                    |  | 0.360805480589579 |    |     |
| 19         | 158 | protein complex disassembly                                         |                  |                    |  |                   |    |     |
| GO:0006401 |     | 2.06927629276862e-29                                                | 118.361746361746 |                    |  | 0.468133693170023 |    |     |
| 20         | 205 | RNA catabolic process                                               |                  |                    |  |                   |    |     |
| GO:0034623 |     | 8.82139705076275e-29                                                | 124.883410138249 |                    |  | 0.397342744446751 |    |     |
| 19         | 174 | cellular macromolecular complex disassembly                         |                  |                    |  |                   |    |     |
| GO:0032984 |     | 1.54922199540392e-28                                                | 120.938392857143 |                    |  | 0.408760639402117 |    |     |
| 19         | 179 | macromolecular complex disassembly                                  |                  |                    |  |                   |    |     |
| GO:0072594 |     | 2.05660090582034e-27                                                | 104.411969111969 |                    |  | 0.46585011417895  |    |     |
| 19         | 204 | establishment of protein localization to organelle                  |                  |                    |  |                   |    |     |
| GO:0019058 |     | 2.36044711594199e-26                                                | 90.9413746630728 |                    |  | 0.527506746937928 |    |     |
| 19         | 231 | viral infectious cycle                                              |                  |                    |  |                   |    |     |
| GO:0022415 |     | 2.37057827528782e-25                                                | 79.834914048607  | 0.593730537679053  |  |                   | 19 |     |
| 260        |     | viral reproductive process                                          |                  |                    |  |                   |    |     |
| GO:0071845 |     | 1.31503124514101e-24                                                | 72.4816711590296 |                    |  | 0.648536433464812 |    |     |
| 19         | 284 | cellular component disassembly at cellular level                    |                  |                    |  |                   |    |     |
| GO:0022411 |     | 1.72390005902751e-24                                                | 71.3836962294211 |                    |  | 0.657670749429105 |    |     |
| 19         | 288 | cellular component disassembly                                      |                  |                    |  |                   |    |     |
| GO:0016032 |     | 9.27379826671703e-21                                                | 43.9375          | 1.02989412497405   |  |                   | 19 | 451 |
|            |     | viral reproduction                                                  |                  |                    |  |                   |    |     |
| GO:0033365 |     | 2.28597037358896e-20                                                | 41.7426054122089 |                    |  | 1.08013286277766  |    |     |
| 19         | 473 | protein localization to organelle                                   |                  |                    |  |                   |    |     |
| GO:0006605 |     | 2.37916861648841e-20                                                | 41.6478806907378 |                    |  | 1.08241644176874  |    |     |
| 19         | 474 | protein targeting                                                   |                  |                    |  |                   |    |     |
| GO:0042274 |     | 8.6489391356826e-06                                                 | 96.02            | 0.0411044218393191 |  |                   | 3  | 18  |
|            |     | ribosomal small subunit biogenesis                                  |                  |                    |  |                   |    |     |
| GO:0022613 |     | 1.03848533290597e-05                                                | 14.4079147640791 |                    |  | 0.513805272991488 |    |     |
| 6          | 225 | ribonucleoprotein complex biogenesis                                |                  |                    |  |                   |    |     |
| GO:0071843 |     | 1.46423493164358e-05                                                | 13.5288507391512 |                    |  | 0.545775378866514 |    |     |
| 6          | 239 | cellular component biogenesis at cellular level                     |                  |                    |  |                   |    |     |
|            |     | Tissue: Nerve_Tibial=>Skin_Sun_Exposed_Lower_leg                    |                  |                    |  |                   |    |     |
|            |     | SourceGene: ZNF426(ENSG00000130818.4)                               |                  |                    |  |                   |    |     |
|            |     | TargetGeneSet: WASF2 MAGOH ENSA BROX GCC2 RPL37A DCP1A SEC62        |                  |                    |  |                   |    |     |
|            |     | SLC34A2 ADAMTS3 RP11 RPL39P3 TBP GTF2IP1 RPS15AP24 ANP32B FAU       |                  |                    |  |                   |    |     |

Stable4\_20PerPair

| RAB6A                                 | RPS3    | SNRPF     | RPS2P5                                                              | RPS29            | RPL3P4            | HMG2P5            | C15orf41 | CTD    |
|---------------------------------------|---------|-----------|---------------------------------------------------------------------|------------------|-------------------|-------------------|----------|--------|
| SUZ12                                 | NLE1    | RPS16     | RPS21                                                               | TCP10L           | NDUFB11           | ZDHC9             |          |        |
| GOBPID                                | Pvalue  | OddsRatio | ExpCount                                                            | Count            | Size              | Term              |          |        |
| GO:0000184                            | 8       | 119       | 3.10082702951292e-12                                                | 79.3846153846154 |                   | 0.172929209051277 |          |        |
|                                       |         |           | nuclear-transcribed mRNA catabolic process, nonsense-mediated decay |                  |                   |                   |          |        |
| GO:0000956                            | 169     |           | 5.2972725883944e-11                                                 | 54.539894887721  | 0.245588540585427 |                   | 8        |        |
|                                       |         |           | nuclear-transcribed mRNA catabolic process                          |                  |                   |                   |          |        |
| GO:0006402                            | 8       | 178       | 8.03358941506834e-11                                                | 51.6199095022624 |                   | 0.258667220261574 |          |        |
|                                       |         |           | mRNA catabolic process                                              |                  |                   |                   |          |        |
| GO:0006613                            | 7       | 106       | 9.99015863106583e-11                                                | 72.3787878787879 |                   | 0.154037782852398 |          |        |
|                                       |         |           | cotranslational protein targeting to membrane                       |                  |                   |                   |          |        |
| GO:0072594                            | 204     |           | 2.39006241070147e-10                                                | 44.690737833595  | 0.296450072659332 |                   | 8        |        |
|                                       |         |           | establishment of protein localization to organelle                  |                  |                   |                   |          |        |
| GO:0006401                            | 8       | 205       | 2.48511036922702e-10                                                | 44.4607575165951 |                   | 0.297903259290015 |          |        |
|                                       |         |           | RNA catabolic process                                               |                  |                   |                   |          |        |
| GO:0006612                            | 7       | 153       | 1.33423773257923e-09                                                | 48.9178082191781 |                   | 0.222337554494499 |          |        |
|                                       |         |           | protein targeting to membrane                                       |                  |                   |                   |          |        |
| GO:0006415                            | 6       | 91        | 2.65350413836654e-09                                                | 67.5058823529412 |                   | 0.132239983392153 |          |        |
|                                       |         |           | translational termination                                           |                  |                   |                   |          |        |
| GO:0006414                            | 6       | 105       | 6.32691400295807e-09                                                | 57.9030303030303 |                   | 0.152584596221715 |          |        |
|                                       |         |           | translational elongation                                            |                  |                   |                   |          |        |
| GO:0006614                            | 6       | 105       | 6.32691400295807e-09                                                | 57.9030303030303 |                   | 0.152584596221715 |          |        |
|                                       |         |           | SRP-dependent cotranslational protein targeting to membrane         |                  |                   |                   |          |        |
| GO:0045047                            |         |           | 6.7005347479569e-09                                                 | 57.32            | 0.154037782852398 |                   | 6        | 106    |
|                                       |         |           | protein targeting to ER                                             |                  |                   |                   |          |        |
| GO:0072599                            |         |           | 6.7005347479569e-09                                                 | 57.32            | 0.154037782852398 |                   | 6        | 106    |
|                                       |         |           | establishment of protein localization to endoplasmic reticulum      |                  |                   |                   |          |        |
| GO:0006605                            | 9       | 474       | 8.43381150091961e-09                                                | 22.5241935483871 |                   | 0.688810462943741 |          |        |
|                                       |         |           | protein targeting                                                   |                  |                   |                   |          |        |
| GO:0070972                            | 6       | 118       | 1.28046562758319e-08                                                | 51.1357142857143 |                   | 0.171476022420594 |          |        |
|                                       |         |           | protein localization to endoplasmic reticulum                       |                  |                   |                   |          |        |
| GO:0019080                            | 6       | 151       | 5.61716063210416e-08                                                | 39.4068965517241 |                   | 0.219431181233133 |          |        |
|                                       |         |           | viral genome expression                                             |                  |                   |                   |          |        |
| GO:0019083                            | 6       | 151       | 5.61716063210416e-08                                                | 39.4068965517241 |                   | 0.219431181233133 |          |        |
|                                       |         |           | viral transcription                                                 |                  |                   |                   |          |        |
| GO:0006413                            | 6       | 152       | 5.8427660726956e-08                                                 | 39.1342465753425 |                   | 0.220884367863816 |          |        |
|                                       |         |           | translational initiation                                            |                  |                   |                   |          |        |
| GO:0043624                            | 153     |           | 6.07580045226447e-08                                                | 38.865306122449  | 0.222337554494499 |                   | 6        |        |
|                                       |         |           | cellular protein complex disassembly                                |                  |                   |                   |          |        |
| GO:0043241                            | 6       | 158       | 7.35921978450444e-08                                                | 37.5736842105263 |                   | 0.229603487647914 |          |        |
|                                       |         |           | protein complex disassembly                                         |                  |                   |                   |          |        |
| GO:0034623                            | 6       | 174       | 1.30566915846309e-07                                                | 33.9571428571429 |                   | 0.252854473738842 |          |        |
|                                       |         |           | cellular macromolecular complex disassembly                         |                  |                   |                   |          |        |
| GO:0032984                            | 179     |           | 1.54445931912642e-07                                                | 32.964161849711  | 0.260120406892257 |                   | 6        |        |
|                                       |         |           | macromolecular complex disassembly                                  |                  |                   |                   |          |        |
| GO:0033365                            | 8       | 473       | 1.73630693240662e-07                                                | 18.4813895781638 |                   | 0.687357276313058 |          |        |
|                                       |         |           | protein localization to organelle                                   |                  |                   |                   |          |        |
| GO:0019058                            | 6       | 231       | 6.9406123036348e-07                                                 | 25.2533333333333 |                   | 0.335686111687772 |          |        |
|                                       |         |           | viral infectious cycle                                              |                  |                   |                   |          |        |
| GO:0022415                            | 6       | 260       | 1.38494421022697e-06                                                | 22.3244094488189 |                   | 0.377828523977579 |          |        |
|                                       |         |           | viral reproductive process                                          |                  |                   |                   |          |        |
| GO:0016032                            |         |           | 2.18983943464244e-06                                                | 15.75            | 0.655387170438032 |                   | 7        | 451    |
|                                       |         |           | viral reproduction                                                  |                  |                   |                   |          |        |
| GO:0071845                            | 6       | 284       | 2.31347185524326e-06                                                | 20.3625899280576 |                   | 0.412705003113971 |          |        |
|                                       |         |           | cellular component disassembly at cellular level                    |                  |                   |                   |          |        |
| GO:0022411                            | 288     |           | 2.50880477984474e-06                                                | 20.068085106383  | 0.418517749636703 |                   | 6        |        |
|                                       |         |           | cellular component disassembly                                      |                  |                   |                   |          |        |
| Tissue: Thyroid=>Adipose_Subcutaneous |         |           | Type:                                                               | asymmetric       |                   |                   |          |        |
| SourceGene:                           |         |           | C11orf94(ENSG00000234776.1)                                         |                  |                   |                   |          |        |
| TargetGeneSet:                        | RPL11   | RP4       | RPS8                                                                | MAGOH            | RPL5              | RWDD3             | RP11     | ATP5F1 |
| HSD3BP2                               | SNRPE   | KIAA1383  | IRF2BP2                                                             | RPS7             | RPLP0P6           | UBC               | SNRPG    | TPRKB  |
| C2orf65                               | HAT1    | EEF1B2    | XRCC5                                                               | RPL37A           | RPL15             | RPSA              | RPL14    | LAMB2  |
| RNF7                                  | RPL22L1 | DNAJC19   | HNRPDL                                                              | OSTC             | WDR70             | CTD               | CWC27    | TAF9   |
|                                       |         |           |                                                                     |                  |                   |                   |          | BTF3   |

Stable4\_20PerPair

| HINT1      | CTB       | SYNPO                                                               | ZNF300           | MRPL22 | NUDCD2  | RPL26L1           | LYRM4    | NOL7   | TDP2        |
|------------|-----------|---------------------------------------------------------------------|------------------|--------|---------|-------------------|----------|--------|-------------|
| RPS10      | RPL10A    | RPL39P3                                                             | MRPS12           | PSMB1  | SLC29A4 | CBX3              | ECD      | NAA38  | SSBP1       |
| RPS20      | SNHG6     | RPL7                                                                | C8orf59          | RPL30  | POLR2K  | KANK1             | RPS6     | NDUFB6 | XPA         |
| SEC61B     | FAM206A   | RPL12                                                               | RPL7A            | CDC123 | RPS24   | RPL13AP5          |          | GSTO1  | POLR2G FIBP |
| LAMTOR1    | CLNS1A    | TMEM126A                                                            |                  | RPS25  | PRR13   | HNRNPA1           | C12orf45 |        | RPLP0       |
| UNC119B    | HMGB1     | F7                                                                  | ERH              | COX16  | RPSAP4  | RPS3AP6           | ANKDD1A  | RPLP1  | CES2        |
| DDX19B     | C17orf61  | PLSCR3                                                              | PLSCR3           | RPL26  | RPS7P1  | RPL23A            | SLC6A4   | RPL19  | RPL27       |
| PSMG2      | HNRNPA1P7 |                                                                     | RPL17            | NFIX   | RPS19   | RPL13A            | RPL28    | CHMP2A | NAA20 DPM1  |
| PFDN4      | BRWD1-IT2 |                                                                     | HIRA             | PRDX4  | PDZD11  | RPS23P8           | CXorf26  | RPL39  | HPRT1       |
| GOBPID     | Pvalue    | OddsRatio                                                           | ExpCount         | Count  | Size    | Term              |          |        |             |
| GO:0006414 |           | 4.58188832262933e-49                                                | 100.549295774648 |        |         | 0.741125181648329 |          |        |             |
| 34         | 105       | translational elongation                                            |                  |        |         |                   |          |        |             |
| GO:0006415 |           | 1.77973484293038e-47                                                | 110.721549636804 |        |         | 0.642308490761885 |          |        |             |
| 32         | 91        | translational termination                                           |                  |        |         |                   |          |        |             |
| GO:0006614 |           | 4.479817834146e-47                                                  | 94.8351449275362 |        |         | 0.741125181648329 |          |        |             |
| 33         | 105       | SRP-dependent cotranslational protein targeting to membrane         |                  |        |         |                   |          |        |             |
| GO:0006613 |           | 6.47458769958061e-47                                                | 93.5294818344253 |        |         | 0.748183516711646 |          |        |             |
| 33         | 106       | cotranslational protein targeting to membrane                       |                  |        |         |                   |          |        |             |
| GO:0045047 |           | 6.47458769958061e-47                                                | 93.5294818344253 |        |         | 0.748183516711646 |          |        |             |
| 33         | 106       | protein targeting to ER                                             |                  |        |         |                   |          |        |             |
| GO:0072599 |           | 6.47458769958061e-47                                                | 93.5294818344253 |        |         | 0.748183516711646 |          |        |             |
| 33         | 106       | establishment of protein localization to endoplasmic reticulum      |                  |        |         |                   |          |        |             |
| GO:0070972 |           | 3.9693343567914e-45                                                 | 80.2578005115089 |        |         | 0.832883537471455 |          |        |             |
| 33         | 118       | protein localization to endoplasmic reticulum                       |                  |        |         |                   |          |        |             |
| GO:0000184 |           | 5.46680105828962e-45                                                | 79.3190091001011 |        |         | 0.839941872534773 |          |        |             |
| 33         | 119       | nuclear-transcribed mRNA catabolic process, nonsense-mediated decay |                  |        |         |                   |          |        |             |
| GO:0019080 |           | 6.33160869608941e-43                                                | 60.8205128205128 |        |         | 1.06580859456093  |          |        |             |
| 34         | 151       | viral genome expression                                             |                  |        |         |                   |          |        |             |
| GO:0019083 |           | 6.33160869608941e-43                                                | 60.8205128205128 |        |         | 1.06580859456093  |          |        |             |
| 34         | 151       | viral transcription                                                 |                  |        |         |                   |          |        |             |
| GO:0006612 |           | 1.03896542454123e-42                                                | 59.7899159663866 |        |         | 1.07992526468756  |          |        |             |
| 34         | 153       | protein targeting to membrane                                       |                  |        |         |                   |          |        |             |
| GO:0000956 |           | 2.19268408537288e-39                                                | 49.9817774936061 |        |         | 1.19285862570064  |          |        |             |
| 33         | 169       | nuclear-transcribed mRNA catabolic process                          |                  |        |         |                   |          |        |             |
| GO:0006413 |           | 2.67922162204485e-39                                                | 54.2057142857143 |        |         | 1.07286692962425  |          |        |             |
| 32         | 152       | translational initiation                                            |                  |        |         |                   |          |        |             |
| GO:0043624 |           | 3.3717066276433e-39                                                 | 53.7539551357733 |        |         | 1.07992526468756  |          |        |             |
| 32         | 153       | cellular protein complex disassembly                                |                  |        |         |                   |          |        |             |
| GO:0043241 |           | 1.03774293688346e-38                                                | 51.6027210884354 |        |         | 1.11521694000415  |          |        |             |
| 32         | 158       | protein complex disassembly                                         |                  |        |         |                   |          |        |             |
| GO:0006402 |           | 1.39576346096265e-38                                                | 46.8497751124438 |        |         | 1.2563836412705   |          |        | 33          |
| 178        | mRNA      | catabolic process                                                   |                  |        |         |                   |          |        |             |
| GO:0072594 |           | 4.16417593864301e-38                                                | 41.7029411764706 |        |         | 1.43990035291675  |          |        |             |
| 34         | 204       | establishment of protein localization to organelle                  |                  |        |         |                   |          |        |             |
| GO:0019058 |           | 9.72323431385238e-38                                                | 37.7212153518124 |        |         | 1.63047539962632  |          |        |             |
| 35         | 231       | viral infectious cycle                                              |                  |        |         |                   |          |        |             |
| GO:0034623 |           | 2.93436748613485e-37                                                | 45.7368209255533 |        |         | 1.22815030101723  |          |        |             |
| 32         | 174       | cellular macromolecular complex disassembly                         |                  |        |         |                   |          |        |             |
| GO:0032984 |           | 7.76666320262037e-37                                                | 44.1655976676385 |        |         | 1.26344197633382  |          |        |             |
| 32         | 179       | macromolecular complex disassembly                                  |                  |        |         |                   |          |        |             |
| GO:0006401 |           | 2.02075855827984e-36                                                | 39.4203741152679 |        |         | 1.44695868798007  |          |        |             |
| 33         | 205       | RNA catabolic process                                               |                  |        |         |                   |          |        |             |
| GO:0022415 |           | 7.33747502724919e-36                                                | 32.792039800995  |        |         | 1.83516711646253  |          |        | 35          |
| 260        | viral     | reproductive process                                                |                  |        |         |                   |          |        |             |
| GO:0071845 |           | 1.43879461956619e-31                                                | 26.8626364108782 |        |         | 2.00456715798215  |          |        |             |
| 33         | 284       | cellular component disassembly at cellular level                    |                  |        |         |                   |          |        |             |
| GO:0022411 |           | 2.30340311471369e-31                                                | 26.4337595907928 |        |         | 2.03280049823542  |          |        |             |
| 33         | 288       | cellular component disassembly                                      |                  |        |         |                   |          |        |             |
| GO:0016032 |           | 5.95522087315355e-30                                                | 19.159977703456  |        |         | 3.18330911355616  |          |        | 37          |
| 451        | viral     | reproduction                                                        |                  |        |         |                   |          |        |             |
| GO:0006605 |           | 6.50904804752065e-28                                                | 17.3237858032379 |        |         | 3.34565082001246  |          |        |             |
| 36         | 474       | protein targeting                                                   |                  |        |         |                   |          |        |             |
| GO:0033365 |           | 1.03401432052651e-26                                                | 16.5911878961358 |        |         | 3.33859248494914  |          |        |             |

Stable4\_20PerPair

|                                       |         |                                                                                          |                  |                   |        |                   |            |                    |         |      |
|---------------------------------------|---------|------------------------------------------------------------------------------------------|------------------|-------------------|--------|-------------------|------------|--------------------|---------|------|
| 35                                    | 473     | protein localization to organelle                                                        |                  |                   |        |                   |            |                    |         |      |
| GO:0022613                            |         | 1.34282864689106e-15                                                                     | 15.7162826061528 |                   |        |                   |            | 1.58812538924642   |         |      |
| 19                                    | 225     | ribonucleoprotein complex biogenesis                                                     |                  |                   |        |                   |            |                    |         |      |
| GO:0071843                            |         | 4.10075410879317e-15                                                                     | 14.7015881708653 |                   |        |                   |            | 1.68694208013286   |         |      |
| 19                                    | 239     | cellular component biogenesis at cellular level                                          |                  |                   |        |                   |            |                    |         |      |
| GO:0042254                            |         | 1.25296005045935e-13                                                                     | 18.2900154400412 |                   |        |                   |            | 1.0516919244343    | 15      |      |
| 149                                   |         | ribosome biogenesis                                                                      |                  |                   |        |                   |            |                    |         |      |
| GO:0042274                            |         | 2.11523361997678e-11                                                                     | 96.044019138756  | 0.127050031139714 |        |                   |            |                    | 7       |      |
| 18                                    |         | ribosomal small subunit biogenesis                                                       |                  |                   |        |                   |            |                    |         |      |
| GO:0006364                            |         | 1.61763612700701e-10                                                                     | 18.5295994328252 |                   |        |                   |            | 0.734066846585011  |         |      |
| 11                                    | 104     | rRNA processing                                                                          |                  |                   |        |                   |            |                    |         |      |
| GO:0016072                            |         | 2.98620379108735e-10                                                                     | 17.3992673992674 |                   |        |                   |            | 0.776416856964916  |         |      |
| 11                                    | 110     | rRNA metabolic process                                                                   |                  |                   |        |                   |            |                    |         |      |
| GO:0042273                            |         | 1.20855297190459e-08                                                                     | 105.611192930781 |                   |        |                   |            | 0.084700020759809  |         |      |
| 5                                     | 12      | ribosomal large subunit biogenesis                                                       |                  |                   |        |                   |            |                    |         |      |
| GO:0034660                            |         | 1.23136219132765e-08                                                                     | 8.26450855417645 |                   |        |                   |            | 2.01162549304546   |         |      |
| 14                                    | 285     | ncRNA metabolic process                                                                  |                  |                   |        |                   |            |                    |         |      |
| GO:0034470                            |         | 1.61007550097505e-07                                                                     | 9.05634048491191 |                   |        |                   |            | 1.41166701266348   |         |      |
| 11                                    | 200     | ncRNA processing                                                                         |                  |                   |        |                   |            |                    |         |      |
| GO:0000377                            |         | 1.73708903383027e-06                                                                     | 7.93086060062752 |                   |        |                   |            | 1.43990035291675   |         |      |
| 10                                    | 204     | RNA splicing, via transesterification reactions with bulged adenosine as nucleophile     |                  |                   |        |                   |            |                    |         |      |
| GO:0000398                            |         | 1.73708903383027e-06                                                                     | 7.93086060062752 |                   |        |                   |            | 1.43990035291675   |         |      |
| 10                                    | 204     | nuclear mRNA splicing, via spliceosome                                                   |                  |                   |        |                   |            |                    |         |      |
| GO:0000375                            |         | 2.16127954638703e-06                                                                     | 7.72886169980336 |                   |        |                   |            | 1.47519202823334   |         |      |
| 10                                    | 209     | RNA splicing, via transesterification reactions                                          |                  |                   |        |                   |            |                    |         |      |
| GO:0022618                            |         | 4.71284595855416e-06                                                                     | 11.941028708134  | 0.670541831015155 |        |                   |            |                    | 7       |      |
| 95                                    |         | ribonucleoprotein complex assembly                                                       |                  |                   |        |                   |            |                    |         |      |
| GO:0071826                            |         | 6.63361502968288e-06                                                                     | 11.2950764006791 |                   |        |                   |            | 0.705833506331742  |         |      |
| 7                                     | 100     | ribonucleoprotein complex subunit organization                                           |                  |                   |        |                   |            |                    |         |      |
| GO:0000028                            |         | 6.72414408354161e-06                                                                     | 144.909090909091 |                   |        |                   |            | 0.0423500103799045 |         |      |
| 3                                     | 6       | ribosomal small subunit assembly                                                         |                  |                   |        |                   |            |                    |         |      |
| GO:0000462                            |         | 6.72414408354161e-06                                                                     | 144.909090909091 |                   |        |                   |            | 0.0423500103799045 |         |      |
| 3                                     | 6       | maturation of SSU-rRNA from tricistronic rRNA transcript (SSU-rRNA, 5.8S rRNA, LSU-rRNA) |                  |                   |        |                   |            |                    |         |      |
| GO:0030490                            |         | 1.17068313659372e-05                                                                     | 108.674242424242 |                   |        |                   |            | 0.0494083454432219 |         |      |
| 3                                     | 7       | maturation of SSU-rRNA                                                                   |                  |                   |        |                   |            |                    |         |      |
| Tissue: Thyroid=>Adipose_Subcutaneous |         | Type:                                                                                    | asymmetric       |                   |        |                   |            |                    |         |      |
| SourceGene:                           |         | C19orf43(ENSG00000123144.5)                                                              |                  |                   |        |                   |            |                    |         |      |
| TargetGeneSet:                        |         | PLEKHN1                                                                                  | PRKCZ            | RP4               | RP1    | RPS8              | CTB        | ABCA4              | RPS27   |      |
| MEF2D                                 | ZC3H11B | UBC                                                                                      | EEF1B2           | KCNE4             | RPL29  | GPR87             | RP11       | TP63               | H3F3AP6 |      |
| RPS3A                                 | CTD     | SKP1                                                                                     | RPS14            | ZNF300            | DSP    | UBD               | FTH1P5     | SENP6              | FOXK1   | BZW2 |
| IGFBP3                                | SLC26A4 | EEF1D                                                                                    | RPL8             | RPS6              | RPL7A  | BCCIP             | RPL27A     | SDHD               | DDX6    | NACA |
| RPL18AP3                              |         | RPL6                                                                                     | ZDHHC20          | RPL21             | EXOSC8 | DNAJC3            | RPL4       | RPS15A             | ESRP2   |      |
| RPL13                                 | GGT6    | RPL26                                                                                    | RPL19            | KRT35             | NT5C   | RPL36             | HNRNPA1P10 | NCCRP1             |         |      |
| ZNF600                                | RPS5    | SOGA1                                                                                    | TSHZ2            | PLA2G3            | RPL3   | TNRC6B            | WDR13      | WDR45              | POF1B   |      |
| RPL39                                 |         |                                                                                          |                  |                   |        |                   |            |                    |         |      |
| GOBPID                                | Pvalue  | OddsRatio                                                                                | ExpCount         | Count             | Size   | Term              |            |                    |         |      |
| GO:0006414                            |         | 3.53396181174091e-35                                                                     | 114.687456445993 |                   |        | 0.421424122898069 |            |                    |         |      |
| 23                                    | 105     | translational elongation                                                                 |                  |                   |        |                   |            |                    |         |      |
| GO:0006415                            |         | 1.41405068971443e-32                                                                     | 116.132432432432 |                   |        | 0.365234239844993 |            |                    |         |      |
| 21                                    | 91      | translational termination                                                                |                  |                   |        |                   |            |                    |         |      |
| GO:0006614                            |         | 3.94933669285342e-31                                                                     | 96.6824324324324 |                   |        | 0.421424122898069 |            |                    |         |      |
| 21                                    | 105     | SRP-dependent cotranslational protein targeting to membrane                              |                  |                   |        |                   |            |                    |         |      |
| GO:0006613                            |         | 4.91293861919361e-31                                                                     | 95.5383147853736 |                   |        | 0.425437685973289 |            |                    |         |      |
| 21                                    | 106     | cotranslational protein targeting to membrane                                            |                  |                   |        |                   |            |                    |         |      |
| GO:0045047                            |         | 4.91293861919361e-31                                                                     | 95.5383147853736 |                   |        | 0.425437685973289 |            |                    |         |      |
| 21                                    | 106     | protein targeting to ER                                                                  |                  |                   |        |                   |            |                    |         |      |
| GO:0072599                            |         | 4.91293861919361e-31                                                                     | 95.5383147853736 |                   |        | 0.425437685973289 |            |                    |         |      |
| 21                                    | 106     | establishment of protein localization to endoplasmic reticulum                           |                  |                   |        |                   |            |                    |         |      |
| GO:0000956                            |         | 4.85786966626846e-30                                                                     | 64.1254403131115 |                   |        | 0.678292159712131 |            |                    |         |      |
| 23                                    | 169     | nuclear-transcribed mRNA catabolic process                                               |                  |                   |        |                   |            |                    |         |      |
| GO:0070972                            |         | 5.70866153285636e-30                                                                     | 83.6489272777933 |                   |        | 0.473600442875926 |            |                    |         |      |

STable4\_20PerPair

|                                       |     |                                                                     |                           |                   |          |          |         |                    |           |         |
|---------------------------------------|-----|---------------------------------------------------------------------|---------------------------|-------------------|----------|----------|---------|--------------------|-----------|---------|
| 21                                    | 118 | protein localization to endoplasmic reticulum                       |                           |                   |          |          |         |                    |           |         |
| GO:0000184                            |     | 6.91487865576159e-30                                                | 82.7895752895753          |                   |          |          |         | 0.477614005951145  |           |         |
| 21                                    | 119 | nuclear-transcribed mRNA catabolic process, nonsense-mediated decay |                           |                   |          |          |         |                    |           |         |
| GO:0006402                            |     | 1.7043328369606e-29                                                 | 60.3638709677419          |                   |          |          |         | 0.714414227389108  |           |         |
| 23                                    | 178 | mRNA catabolic process                                              |                           |                   |          |          |         |                    |           |         |
| GO:0006401                            |     | 5.04637953237574e-28                                                | 51.3113029827316          |                   |          |          |         | 0.82278043042004   |           |         |
| 23                                    | 205 | RNA catabolic process                                               |                           |                   |          |          |         |                    |           |         |
| GO:0019080                            |     | 1.44152805700065e-27                                                | 62.270893970894           | 0.606048024358176 |          |          |         |                    | 21        |         |
| 151                                   |     | viral genome expression                                             |                           |                   |          |          |         |                    |           |         |
| GO:0019083                            |     | 1.44152805700065e-27                                                | 62.270893970894           | 0.606048024358176 |          |          |         |                    | 21        |         |
| 151                                   |     | viral transcription                                                 |                           |                   |          |          |         |                    |           |         |
| GO:0006413                            |     | 1.6684861258793e-27                                                 | 61.7912110583866          |                   |          |          |         | 0.610061587433396  |           |         |
| 21                                    | 152 | translational initiation                                            |                           |                   |          |          |         |                    |           |         |
| GO:0006612                            |     | 1.9291555246234e-27                                                 | 61.3187960687961          |                   |          |          |         | 0.614075150508615  |           |         |
| 21                                    | 153 | protein targeting to membrane                                       |                           |                   |          |          |         |                    |           |         |
| GO:0043624                            |     | 1.9291555246234e-27                                                 | 61.3187960687961          |                   |          |          |         | 0.614075150508615  |           |         |
| 21                                    | 153 | cellular protein complex disassembly                                |                           |                   |          |          |         |                    |           |         |
| GO:0043241                            |     | 3.92632307364915e-27                                                | 59.0601696587098          |                   |          |          |         | 0.634142965884714  |           |         |
| 21                                    | 158 | protein complex disassembly                                         |                           |                   |          |          |         |                    |           |         |
| GO:0034623                            |     | 3.26927523770176e-26                                                | 52.8245892951775          |                   |          |          |         | 0.698359975088229  |           |         |
| 21                                    | 174 | cellular macromolecular complex disassembly                         |                           |                   |          |          |         |                    |           |         |
| GO:0032984                            |     | 6.07215039653247e-26                                                | 51.134964078002           | 0.718427790464328 |          |          |         |                    | 21        |         |
| 179                                   |     | macromolecular complex disassembly                                  |                           |                   |          |          |         |                    |           |         |
| GO:0072594                            |     | 1.03773523730116e-24                                                | 44.0717766947275          |                   |          |          |         | 0.81876686734482   |           |         |
| 21                                    | 204 | establishment of protein localization to organelle                  |                           |                   |          |          |         |                    |           |         |
| GO:0019058                            |     | 1.50115437852748e-23                                                | 38.3324324324324          |                   |          |          |         | 0.927133070375753  |           |         |
| 21                                    | 231 | viral infectious cycle                                              |                           |                   |          |          |         |                    |           |         |
| GO:0071845                            |     | 3.762365063634e-23                                                  | 32.9603477523325          |                   |          |          |         | 1.1398519133624    | 22        |         |
| 284                                   |     | cellular component disassembly at cellular level                    |                           |                   |          |          |         |                    |           |         |
| GO:0022411                            |     | 5.12908182491589e-23                                                | 32.4555137844612          |                   |          |          |         | 1.15590616566328   |           |         |
| 22                                    | 288 | cellular component disassembly                                      |                           |                   |          |          |         |                    |           |         |
| GO:0022415                            |     | 1.86373894425895e-22                                                | 33.6123487504241          |                   |          |          |         | 1.04352639955712   |           |         |
| 21                                    | 260 | viral reproductive process                                          |                           |                   |          |          |         |                    |           |         |
| GO:0016032                            |     | 8.98932556008988e-19                                                | 19.8917378917379          |                   |          |          |         | 1.81011694692409   |           |         |
| 22                                    | 451 | viral reproduction                                                  |                           |                   |          |          |         |                    |           |         |
| GO:0033365                            |     | 4.58332234219373e-17                                                | 17.50544128199            | 1.89841533457892  |          |          |         |                    | 21        |         |
| 473                                   |     | protein localization to organelle                                   |                           |                   |          |          |         |                    |           |         |
| GO:0006605                            |     | 4.78372454065249e-17                                                | 17.4655450152139          |                   |          |          |         | 1.90242889765414   |           |         |
| 21                                    | 474 | protein targeting                                                   |                           |                   |          |          |         |                    |           |         |
| GO:0022613                            |     | 2.9915768230483e-06                                                 | 10.4523502304147          |                   |          |          |         | 0.903051691924434  |           |         |
| 8                                     | 225 | ribonucleoprotein complex biogenesis                                |                           |                   |          |          |         |                    |           |         |
| GO:0071843                            |     | 4.67770726164057e-06                                                | 9.80917748917749          |                   |          |          |         | 0.95924157497751   |           |         |
| 8                                     | 239 | cellular component biogenesis at cellular level                     |                           |                   |          |          |         |                    |           |         |
| GO:0007603                            |     | 9.89560402546092e-06                                                | 98.0795454545455          |                   |          |          |         | 0.0441491938274168 |           |         |
| 3                                     | 11  | phototransduction, visible light                                    |                           |                   |          |          |         |                    |           |         |
| Tissue: Thyroid=>Adipose_Subcutaneous |     | Type:                                                               | asymmetric                |                   |          |          |         |                    |           |         |
| SourceGene:                           |     | C6orf108(ENSG00000112667.8)                                         |                           |                   |          |          |         |                    |           |         |
| TargetGeneSet:                        |     | CLSTN1                                                              | HSPG2                     | PEF1              | RPS8     | RP4      | CRYZ    | CCBL2              | RPL5      | RP11    |
| SRGAP2P2                              |     | JTB                                                                 | RPS27                     | TKT               | GORAB    | PRRC2C   | TPR     | ZBTB41             | FAM108A4P |         |
| RPS7                                  |     | UBC                                                                 | PRORS1P                   | UGGT1             | KLF7     | BRK1     | WDR48   | LAMB2              | APPL1     |         |
| KCTD6                                 |     | CCDC80                                                              | PHC3                      | DNAJC19           | PPP1R2   | BOD1L    | MTHFD2L | WDFY3-AS1          | RPL34     |         |
| RPS3A                                 |     | CTD                                                                 | SKP1                      | RPS14             | HMGNA4   | HCG16    | WDR11   | IGF2R              | STARD3NL  |         |
| RPS3AP26                              |     |                                                                     | MTPN                      | LSM1              | PPAPDC1B |          | HOOK3   | PAG1               | RNF19A    | SMARCA2 |
| CDC26                                 |     | RPL12                                                               | RPL7A                     | NUDT5             | ANAPC16  | RPS24    | RPS3AP5 | ARL3               | EIF6      | RPL27A  |
| CKAP5                                 |     | AHNAK                                                               | SLC22A25                  |                   | NUMA1    | TMEM126B |         | BACE1              | UBE4A     | CD163L1 |
| SCAF11                                |     | LRP1                                                                | EEA1                      | ISCU              | DNAJC3   | CCNB1IP1 |         | RPS27L             | RPL4      | IFT140  |
| RPS15A                                |     | TERF2                                                               | RPL26                     | RPS7P1            | RPL23A   | TAOK1    | RPL17   | RPL27              | RPS7P11   | TNRC6C  |
| CEP192                                |     | RPL12P4                                                             | EP300                     | C22orf32          |          | MXRA5    | RPS4X   | RPL39              |           |         |
| GOBPID                                |     | Pvalue                                                              | OddsRatio                 | ExpCount          | Count    | Size     | Term    |                    |           |         |
| GO:0006415                            |     |                                                                     | 2.10803275797202e-29      | 75.2789473684211  |          |          |         | 0.491177081170853  |           |         |
| 21                                    |     | 91                                                                  | translational termination |                   |          |          |         |                    |           |         |
| GO:0006414                            |     |                                                                     | 5.77875692373691e-28      | 62.6710526315789  |          |          |         | 0.566742785966369  |           |         |
| 21                                    |     | 105                                                                 | translational elongation  |                   |          |          |         |                    |           |         |

Stable4\_20PerPair

|            |                      |                                                                     |                    |     |
|------------|----------------------|---------------------------------------------------------------------|--------------------|-----|
| GO:0006614 | 5.77875692373691e-28 | 62.6710526315789                                                    | 0.566742785966369  |     |
| 21         | 105                  | SRP-dependent cotranslational protein targeting to membrane         |                    |     |
| GO:0006613 | 7.17914378665368e-28 | 61.9294117647059                                                    | 0.572140336308906  |     |
| 21         | 106                  | cotranslational protein targeting to membrane                       |                    |     |
| GO:0045047 | 7.17914378665368e-28 | 61.9294117647059                                                    | 0.572140336308906  |     |
| 21         | 106                  | protein targeting to ER                                             |                    |     |
| GO:0072599 | 7.17914378665368e-28 | 61.9294117647059                                                    | 0.572140336308906  |     |
| 21         | 106                  | establishment of protein localization to endoplasmic reticulum      |                    |     |
| GO:0070972 | 8.20948226222399e-27 | 54.2224633749322                                                    | 0.636910940419348  |     |
| 21         | 118                  | protein localization to endoplasmic reticulum                       |                    |     |
| GO:0000184 | 9.93085599893116e-27 | 53.6654135338346                                                    | 0.642308490761885  |     |
| 21         | 119                  | nuclear-transcribed mRNA catabolic process, nonsense-mediated decay |                    |     |
| GO:0019080 | 4.68301832880547e-26 | 43.3787375415282                                                    | 0.815030101723064  |     |
| 22         | 151                  | viral genome expression                                             |                    |     |
| GO:0019083 | 4.68301832880547e-26 | 43.3787375415282                                                    | 0.815030101723064  |     |
| 22         | 151                  | viral transcription                                                 |                    |     |
| GO:0000956 | 6.23836773568815e-25 | 38.0189504373178                                                    | 0.912186007888727  |     |
| 22         | 169                  | nuclear-transcribed mRNA catabolic process                          |                    |     |
| GO:0006402 | 2.03651287174155e-24 | 35.8028846153846                                                    | 0.960763960971559  |     |
| 22         | 178                  | mRNA catabolic process                                              |                    |     |
| GO:0006413 | 2.29291946577241e-24 | 40.053836882282                                                     | 0.820427652065601  | 21  |
| 152        |                      | translational initiation                                            |                    |     |
| GO:0006612 | 2.647604090615e-24   | 39.7476076555024                                                    | 0.825825202408138  |     |
| 21         | 153                  | protein targeting to membrane                                       |                    |     |
| GO:0043624 | 2.647604090615e-24   | 39.7476076555024                                                    | 0.825825202408138  |     |
| 21         | 153                  | cellular protein complex disassembly                                |                    |     |
| GO:0043241 | 5.3526565448962e-24  | 38.2835190165194                                                    | 0.852812954120822  |     |
| 21         | 158                  | protein complex disassembly                                         |                    |     |
| GO:0034623 | 4.36256393431683e-23 | 34.2414860681115                                                    | 0.939173759601412  |     |
| 21         | 174                  | cellular macromolecular complex disassembly                         |                    |     |
| GO:0072594 | 4.43450340207823e-23 | 30.6320643642072                                                    | 1.10110026987752   |     |
| 22         | 204                  | establishment of protein localization to organelle                  |                    |     |
| GO:0006401 | 4.94897124682394e-23 | 30.4625292740047                                                    | 1.10649782022005   |     |
| 22         | 205                  | RNA catabolic process                                               |                    |     |
| GO:0032984 | 8.04872623616844e-23 | 33.1462358427715                                                    | 0.966161511314096  |     |
| 21         | 179                  | macromolecular complex disassembly                                  |                    |     |
| GO:0019058 | 7.11073970455692e-22 | 26.6240601503759                                                    | 1.24683412912601   |     |
| 22         | 231                  | viral infectious cycle                                              |                    |     |
| GO:0033365 | 5.51543519836817e-21 | 16.5316539171722                                                    | 2.55304131201993   |     |
| 27         | 473                  | protein localization to organelle                                   |                    |     |
| GO:0022415 | 9.68003615885008e-21 | 23.3320828331333                                                    | 1.40336308905958   |     |
| 22         | 260                  | viral reproductive process                                          |                    |     |
| GO:0071845 | 6.67665909730729e-20 | 21.1588058887677                                                    | 1.53290429728046   |     |
| 22         | 284                  | cellular component disassembly at cellular level                    |                    |     |
| GO:0022411 | 9.0530347428169e-20  | 20.8347207303974                                                    | 1.55449449865061   |     |
| 22         | 288                  | cellular component disassembly                                      |                    |     |
| GO:0006605 | 1.44216818696266e-18 | 14.6278942723873                                                    | 2.55843886236247   |     |
| 25         | 474                  | protein targeting                                                   |                    |     |
| GO:0016032 | 6.63950148420574e-18 | 14.5157429091855                                                    | 2.43429520448412   |     |
| 24         | 451                  | viral reproduction                                                  |                    |     |
| GO:0022613 | 3.17925908695173e-08 | 10.8626726182173                                                    | 1.21444882707079   |     |
| 11         | 225                  | ribonucleoprotein complex biogenesis                                |                    |     |
| GO:0042274 | 3.26261657760861e-08 | 75.6585879873551                                                    | 0.0971559061656633 |     |
| 5          | 18                   | ribosomal small subunit biogenesis                                  |                    |     |
| GO:0071843 | 5.90216155929363e-08 | 10.1855852317361                                                    | 1.29001453186631   |     |
| 11         | 239                  | cellular component biogenesis at cellular level                     |                    |     |
| GO:0042254 | 1.0287403911049e-07  | 13.2605590062112                                                    | 0.804235001037991  |     |
| 9          | 149                  | ribosome biogenesis                                                 |                    |     |
| GO:0006364 | 1.4171483529461e-06  | 14.5102366777988                                                    | 0.561345235623832  |     |
| 7          | 104                  | rRNA processing                                                     |                    |     |
| GO:0016072 | 2.06869764851902e-06 | 13.6592369752496                                                    | 0.593730537679053  |     |
| 7          | 110                  | rRNA metabolic process                                              |                    |     |
| GO:0030490 | 5.21301543614226e-06 | 143.69                                                              | 0.0377828523977579 | 3 7 |

Stable4\_20PerPair

maturation of SSU-rRNA

Tissue: Thyroid=>Adipose\_Subcutaneous Type: asymmetric

SourceGene: CTD-2034L19.1(ENSG00000248394.1)

TargetGeneSet: MTND1P23 MTND2P28 NMNAT1 DFFA AIM1L DNAJC8 RP11  
RPS8 HBXIP SPRR2D RPS27 CADM3 PFN1P1 GAS5 HMG1P4 ST13P19 XDH  
DGUOK-AS1 EIF5B UGGT1 RHOQP3 HAT1 H3F3AP4 CASP10 TRANK1 RPL29  
METTL15P1 SETD7 H3F3AP6 RPS3A C5orf15 SKP1 CTB MTND5P11  
RPL15P3 PPIAP29 AGPAT1 FTH1P5 MTRNR2L9 KIAA1919 FOXK1 EEF1A1P6  
RPS3AP26 POLR2J ARF5 CTAGE8 HMBOX1 HOOK3 GS1 ATP6V1G1  
RPL7A FUT11 EIF2S2P3 MRPL43 GLRX3 MTRNR2L8 TSG101 C11orf94  
ALDH3B2 DDX6 BARX2 KRT6B NACA RPL6 COX6A1 SBNO1 GOLGA3 MED4-AS1  
NDFIP2 PSMA6 TJP1 HERC2P10 C15orf40 CTD MPG HBQ1  
SPSB3 RPS15A SULT1A4 NFATC3 VPS53 TLCD2 RPL26 C17orf48 TAF15  
RPL19 RPS7P11 PRR15L RPS2P48 ROCK1P1 MYL12B RPL17 HMSD HNRNPA1P10  
SLC35E1 LGALS7 RPL18 RPL13A KLK7 RPS5 RPL41P1 KIF3B RP4 RPL12P4  
HMGB1P10 PRR14L RPL3 RBX1 USP9X RP6 RPS4X TTC3P1 RPL  
HCFC1 RPL10 MT

| GOBPID     | Pvalue | OddsRatio                                                           | ExpCount         | Count            | Size | Term              |
|------------|--------|---------------------------------------------------------------------|------------------|------------------|------|-------------------|
| GO:0006415 | 16     | 4.75045189170174e-21                                                | 54.4914285714286 | 54.4914285714286 |      | 0.453394228773095 |
|            | 91     | translational termination                                           |                  |                  |      |                   |
| GO:0006414 | 16     | 5.42406537022357e-20                                                | 45.8747993579454 | 45.8747993579454 |      | 0.523147187045879 |
|            | 105    | translational elongation                                            |                  |                  |      |                   |
| GO:0006614 | 16     | 5.42406537022357e-20                                                | 45.8747993579454 | 45.8747993579454 |      | 0.523147187045879 |
|            | 105    | SRP-dependent cotranslational protein targeting to membrane         |                  |                  |      |                   |
| GO:0006613 | 16     | 6.36490887575167e-20                                                | 45.3619047619048 | 45.3619047619048 |      | 0.528129541208221 |
|            | 106    | cotranslational protein targeting to membrane                       |                  |                  |      |                   |
| GO:0045047 | 16     | 6.36490887575167e-20                                                | 45.3619047619048 | 45.3619047619048 |      | 0.528129541208221 |
|            | 106    | protein targeting to ER                                             |                  |                  |      |                   |
| GO:0072599 | 16     | 6.36490887575167e-20                                                | 45.3619047619048 | 45.3619047619048 |      | 0.528129541208221 |
|            | 106    | establishment of protein localization to endoplasmic reticulum      |                  |                  |      |                   |
| GO:0070972 | 16     | 3.84607719690325e-19                                                | 39.9915966386555 | 39.9915966386555 |      | 0.587917791156321 |
|            | 118    | protein localization to endoplasmic reticulum                       |                  |                  |      |                   |
| GO:0000184 | 16     | 4.42721450880039e-19                                                | 39.6005547850208 | 39.6005547850208 |      | 0.592900145318663 |
|            | 119    | nuclear-transcribed mRNA catabolic process, nonsense-mediated decay |                  |                  |      |                   |
| GO:0019080 | 17     | 6.98033579785191e-19                                                | 32.8582089552239 | 32.8582089552239 |      | 0.752335478513598 |
|            | 151    | viral genome expression                                             |                  |                  |      |                   |
| GO:0019083 | 17     | 6.98033579785191e-19                                                | 32.8582089552239 | 32.8582089552239 |      | 0.752335478513598 |
|            | 151    | viral transcription                                                 |                  |                  |      |                   |
| GO:0006413 | 17     | 7.83085074124861e-19                                                | 32.6125252525253 | 32.6125252525253 |      | 0.757317832675939 |
|            | 152    | translational initiation                                            |                  |                  |      |                   |
| GO:0022415 | 20     | 8.22254859659035e-19                                                | 22.6586538461538 | 22.6586538461538 |      | 1.29541208220884  |
|            | 260    | viral reproductive process                                          |                  |                  |      |                   |
| GO:0019058 | 19     | 1.96121604843618e-18                                                | 23.9563011747953 | 23.9563011747953 |      | 1.15092381150093  |
|            | 231    | viral infectious cycle                                              |                  |                  |      |                   |
| GO:0000956 | 17     | 4.9171950353796e-18                                                 | 28.9305023923445 | 28.9305023923445 |      | 0.842017853435748 |
|            | 169    | nuclear-transcribed mRNA catabolic process                          |                  |                  |      |                   |
| GO:0006402 | 17     | 1.20074409114895e-17                                                | 27.2959909655562 | 27.2959909655562 |      | 0.886859040896824 |
|            | 178    | mRNA catabolic process                                              |                  |                  |      |                   |
| GO:0016032 | 23     | 1.27258931473331e-17                                                | 15.3000667556742 | 15.3000667556742 |      | 2.24704172721611  |
|            | 451    | viral reproduction                                                  |                  |                  |      |                   |
| GO:0006612 | 16     | 2.7774367925768e-17                                                 | 29.7017726798749 | 29.7017726798749 |      | 0.762300186838281 |
|            | 153    | protein targeting to membrane                                       |                  |                  |      |                   |
| GO:0043624 | 16     | 2.7774367925768e-17                                                 | 29.7017726798749 | 29.7017726798749 |      | 0.762300186838281 |
|            | 153    | cellular protein complex disassembly                                |                  |                  |      |                   |
| GO:0043241 | 16     | 4.68432741617164e-17                                                | 28.6458752515091 | 28.6458752515091 |      | 0.78721195764999  |
|            | 158    | protein complex disassembly                                         |                  |                  |      |                   |
| GO:0006401 | 17     | 1.33614007288617e-16                                                | 23.3314313346228 | 23.3314313346228 |      | 1.02138260328005  |
|            | 205    | RNA catabolic process                                               |                  |                  |      |                   |
| GO:0034623 | 16     | 2.22674282394987e-16                                                | 25.7160940325497 | 25.7160940325497 |      | 0.866929624247457 |
|            | 174    | cellular macromolecular complex disassembly                         |                  |                  |      |                   |
| GO:0032984 | 16     | 3.510842773563e-16                                                  | 24.9184925503944 | 24.9184925503944 |      | 0.891841395059165 |
|            | 179    | macromolecular complex disassembly                                  |                  |                  |      |                   |
| GO:0071845 | 16     | 1.78371966509068e-15                                                | 17.6854636591479 | 17.6854636591479 |      | 1.41498858210504  |

Stable4\_20PerPair

|                |                               |                                                                                      |                  |                  |           |          |         |          |                  |
|----------------|-------------------------------|--------------------------------------------------------------------------------------|------------------|------------------|-----------|----------|---------|----------|------------------|
| 18             | 284                           | cellular component disassembly at cellular level                                     |                  |                  |           |          |         |          |                  |
| GO:0022411     |                               | 2.27923242445049e-15                                                                 | 17.4185185185185 |                  |           |          |         |          | 1.43491799875441 |
| 18             | 288                           | cellular component disassembly                                                       |                  |                  |           |          |         |          |                  |
| GO:0072594     |                               | 2.82815523203863e-15                                                                 | 21.5668693009119 |                  |           |          |         |          | 1.01640024911771 |
| 16             | 204                           | establishment of protein localization to organelle                                   |                  |                  |           |          |         |          |                  |
| GO:0033365     |                               | 1.10032896569639e-10                                                                 | 9.43744019138756 |                  |           |          |         |          | 2.35665351878763 |
| 17             | 473                           | protein localization to organelle                                                    |                  |                  |           |          |         |          |                  |
| GO:0006605     |                               | 1.05853921576791e-09                                                                 | 8.68434185901435 |                  |           |          |         |          | 2.36163587294997 |
| 16             | 474                           | protein targeting                                                                    |                  |                  |           |          |         |          |                  |
| Tissue:        | Adipose_Subcutaneous=>Thyroid | Type:                                                                                | asymmetric       |                  |           |          |         |          |                  |
| SourceGene:    | ENSG00000179935.5             |                                                                                      |                  |                  |           |          |         |          |                  |
| TargetGeneSet: | NOL9                          | DNAJC11                                                                              | DNAJC16          | TCEB3            | ARID1A    | NUDC     | SNRNP40 | TXLNA    |                  |
| ADPRHL2        | GNL2                          | RP11                                                                                 | IP013            | POMGNT1          | Clorf123  | WDR3     | GOLPH3L | ADAR     |                  |
| PYGO2          | FLAD1                         | CCT3                                                                                 | METTL13          | STX6             | DHX9      | RBBP5    | FBXO28  | ACBD3    | LIN9             |
| HEATR1         | HNRNPU                        | TAF1B                                                                                | PREB             | SLC5A6           | EIF2B4    | PPM1G    | ASS1P2  | PNPT1    | PAPOLG           |
| POLR1A         | RPIA                          | LMAN2L                                                                               | POLR1B           | AMMECR1L         |           | CREB1    | ATIC    | CLN5     | ANO7             |
| ZDHHC3         | SCAP                          | SLC52A1                                                                              | ACTR8            | SHQ1             | QTRTD1    | TSC22D2  | ACTL6A  | ABCF3    | ALG3             |
| PSMD2          | LETM1                         | FAM193A                                                                              | GRPEL1           | ANKRD17          | SDAD1     | CCT5     | MARCH6  | NUP155   | SKIV2L2          |
| MIER3          | IP011                         | C5orf48                                                                              | HARS             | TSPAN17          | ZSCAN12P1 |          | TRIM27  | C6orf25  | VARS             |
| ZBTB9          | BYSL                          | PPP2R5D                                                                              | MCM3             | RP3              | LATS1     | MRPL18   | EIF3B   | C7orf26  | BAZ1B            |
| MEPCE          | METTL2A                       | TNPO3                                                                                | CASP2            | ZNF398           | ABCF2     | NEIL2    | POLR3D  | ELP3     | INTS9            |
| TMEM68         | SMU1                          | NOL6                                                                                 | ALG2             | PAPPA            | NUP188    | EXOSC2   | TPRN    | NGB      | BMS1             |
| HNRNPF         | ZFAND4                        | SEC24C                                                                               | POLR3A           | PDCD11           | CTR9      | NAT10    | SSRP1   | CCDC86   | MTA2             |
| GANAB          | C11orf84                      |                                                                                      | MARK2            | STIP1            | MRPL11    | ANKRD42  | DDX10   | ZNF259   | DDX6             |
| TRAPPC4        | FKBP4                         | RP4                                                                                  | DDX23            | TARBP2           | SUOX      | OBFC2B   | CCT2    | UTP20    | RNF34            |
| DDX55          | PUS1                          | PRMT5-AS1                                                                            |                  | PRMT5            | AHSA1     | PPP1R14D |         | TUBGCP4  | GABPB1           |
| RNF111         | DIS3L                         | ASB7                                                                                 | SOLH             | DNAJA3           | GLYR1     | CTD      | CD2BP2  | TBC1D10B |                  |
| SALL1          | TMC07                         | CIRH1A                                                                               | EXOSC6           | SF3B3            | DHODH     | ZNF778   | TSR1    | TP53     | ELAC2            |
| TMEM11         | TMEM199                       | ERAL1                                                                                | UTP6             | PSME3            | TMEM101   | EFTUD2   | UBE2Z   | DLX3     | PPP1R9B          |
| APPBP2         | TACO1                         | FTSJ3                                                                                | SRP68            | CANT1            | EIF4A3    | MBD1     | MOB3A   | ELAVL1   | HNRNPM           |
| SYCE2          | DNAJB1                        | MPV17L2                                                                              | ZNF526           | GRWD1            | PRMT1     | FIZ1     | ZNF264  | ZNF749   | ZNF549           |
| ZNF586         | ZSCAN22                       | FAM110A                                                                              | NOP56            | CSRP2BP          | SYS1      | NCOA5    | ZFP64   | URB1     | GART             |
| MORC2          | PRR14L                        | ADSL                                                                                 | XPNPEP3          | L3MBTL2          | RRP7A     | BCOR     | GPKOW   | SMC1A    | FAM123B          |
| TCEAL3-AS1     |                               | UTP14A                                                                               |                  |                  |           |          |         |          |                  |
| GOBPID         | Pvalue                        | OddsRatio                                                                            | ExpCount         | Count            | Size      | Term     |         |          |                  |
| GO:0071843     |                               | 1.73703127267487e-19                                                                 | 12.1937862032649 |                  |           |          |         |          | 2.99349525984361 |
| 28             | 239                           | cellular component biogenesis at cellular level                                      |                  |                  |           |          |         |          |                  |
| GO:0022613     |                               | 4.32132962375617e-19                                                                 | 12.4604486422668 |                  |           |          |         |          | 2.81814407307453 |
| 27             | 225                           | ribonucleoprotein complex biogenesis                                                 |                  |                  |           |          |         |          |                  |
| GO:0042254     |                               | 1.69362791843912e-16                                                                 | 14.50107421875   | 1.8662376306138  | 21        |          |         |          | 149              |
| 24             | 285                           | ncRNA metabolic process                                                              |                  |                  |           |          |         |          |                  |
| GO:0016072     |                               | 6.8172733156039e-12                                                                  | 13.4828788839569 |                  |           |          |         |          | 1.37775932461421 |
| 15             | 110                           | rRNA metabolic process                                                               |                  |                  |           |          |         |          |                  |
| GO:0034470     |                               | 6.97407048258037e-12                                                                 | 9.12935679694427 |                  |           |          |         |          | 2.50501695384402 |
| 19             | 200                           | ncRNA processing                                                                     |                  |                  |           |          |         |          |                  |
| GO:0006364     |                               | 4.20316621408951e-11                                                                 | 13.208250166334  | 1.30260881599889 |           |          |         |          | 14               |
| 104            |                               | rRNA processing                                                                      |                  |                  |           |          |         |          |                  |
| GO:0000377     |                               | 2.80058731469138e-07                                                                 | 6.21241727072171 |                  |           |          |         |          | 2.5551172929209  |
| 204            |                               | RNA splicing, via transesterification reactions with bulged adenosine as nucleophile |                  |                  |           |          |         |          |                  |
| GO:0000398     |                               | 2.80058731469138e-07                                                                 | 6.21241727072171 |                  |           |          |         |          | 2.5551172929209  |
| 204            |                               | nuclear mRNA splicing, via spliceosome                                               |                  |                  |           |          |         |          |                  |
| GO:0022618     |                               | 2.98387086649268e-07                                                                 | 9.75920192638459 |                  |           |          |         |          | 1.18988305307591 |
| 10             | 95                            | ribonucleoprotein complex assembly                                                   |                  |                  |           |          |         |          |                  |
| GO:0000375     |                               | 3.76452682895004e-07                                                                 | 6.05097497313066 |                  |           |          |         |          | 2.61774271676701 |
| 14             | 209                           | RNA splicing, via transesterification reactions                                      |                  |                  |           |          |         |          |                  |
| GO:0071826     |                               | 4.84306528829035e-07                                                                 | 9.21377517868746 |                  |           |          |         |          | 1.25250847692201 |
| 10             | 100                           | ribonucleoprotein complex subunit organization                                       |                  |                  |           |          |         |          |                  |
| GO:0006397     |                               | 2.73444066408918e-06                                                                 | 4.02560262789237 |                  |           |          |         |          | 4.99750882291883 |
| 18             | 399                           | mRNA processing                                                                      |                  |                  |           |          |         |          |                  |
| GO:0006457     |                               | 3.29274085052668e-06                                                                 | 5.36215693173821 |                  |           |          |         |          | 2.70541831015155 |



STable4\_20PerPair

|                                       |          |                                                                     |                      |                  |                   |         |          |                   |          |            |
|---------------------------------------|----------|---------------------------------------------------------------------|----------------------|------------------|-------------------|---------|----------|-------------------|----------|------------|
| 13                                    | 216      | protein folding                                                     |                      |                  |                   |         |          |                   |          |            |
| GO:0006354                            |          |                                                                     | 8.38605689660854e-06 | 7.4899577167019  | 1.35270915507577  |         |          |                   |          | 9          |
| 108                                   |          | DNA-dependent transcription, elongation                             |                      |                  |                   |         |          |                   |          |            |
| GO:0008380                            |          |                                                                     | 1.36693574880991e-05 | 4.09618995462369 |                   |         |          | 4.0456023804581   |          | 15         |
| 323                                   |          | RNA splicing                                                        |                      |                  |                   |         |          |                   |          |            |
| Tissue: Thyroid=>Adipose_Subcutaneous |          |                                                                     | Type:                | asymmetric       |                   |         |          |                   |          |            |
| SourceGene:                           |          |                                                                     | ENSG00000239948.1    |                  |                   |         |          |                   |          |            |
| TargetGeneSet:                        |          |                                                                     | MTND2P28             | RPL22            | RPL11             | ARID1A  | KPNA7    | RP1               | RPS8     |            |
| RPS15AP10                             |          |                                                                     | GTF2B                | RPL5             | RP11              | RPS27   | MTX1     | UBC               | EIF5B    | MZT2B BRK1 |
| RPL15                                 | RNF123   |                                                                     | RPL29                | DCP1A            | PCNP              | RPL24   | FAM162A  | DNAJC19           | ZBTB12B  | RPL34      |
| RPS3A                                 | FAM160A1 |                                                                     |                      | SKP1             | CTB               | SLC25A2 | RPS14    | RPL15P3           | NOL7     | RPS10      |
| RPL10A                                | YIPF3    |                                                                     | MTRNR2L9             |                  | RPL39P3           | HSF2    | MRPS12   | EEF1A1P6          |          | BAZ1B      |
| RPS3AP26                              |          |                                                                     | TRIM56               | HMBOX1           | RPS20             | MED30   | RPS6     | DCTN3             | SETX     | RPL7A      |
| RPS24                                 | PGAM1    |                                                                     | RPL27A               | BARX2            | SLC38A4           | PFDN5   | NACA     | STAT6             | MRS2P2   | RPL18AP3   |
| MLXIP                                 | ZC3H13   |                                                                     | MBIP                 | SIVA1            | RPL9P25           | RPL4    | C15orf40 |                   | SEC11A   | RPS15A     |
| RPL26                                 | RPL23A   |                                                                     | RPL17                | RPL19            | RPL27             | SNORA76 | ATF4P3   | ROCK1P1           | C18orf32 |            |
| RPS15                                 | ZBTB7A   |                                                                     | RPL36                | CTD              | BRD4              | RPSAP58 | BCKDHA   | RPL18             | RPS5     | RPL41P1    |
| SOGA1                                 | DPM1     |                                                                     | HMGB1P10             |                  | RPL3              | RP4     | RP6      | UXT               | RPS4X    | RPL10 MT   |
| GOBPID                                |          |                                                                     | Pvalue               | OddsRatio        | ExpCount          | Count   | Size     | Term              |          |            |
| GO:0006415                            |          |                                                                     | 1.67042444738663e-54 | 185.120689655172 |                   |         |          | 0.48487993910456  |          |            |
| 33                                    | 91       | translational termination                                           |                      |                  |                   |         |          |                   |          |            |
| GO:0006614                            |          |                                                                     | 3.20328827974753e-54 | 159.286603340976 |                   |         |          | 0.559476852812954 |          |            |
| 34                                    | 105      | SRP-dependent cotranslational protein targeting to membrane         |                      |                  |                   |         |          |                   |          |            |
| GO:0006613                            |          |                                                                     | 4.70222493290163e-54 | 157.06330749354  | 0.564805203792125 |         |          |                   |          | 34         |
| 106                                   |          | cotranslational protein targeting to membrane                       |                      |                  |                   |         |          |                   |          |            |
| GO:0045047                            |          |                                                                     | 4.70222493290163e-54 | 157.06330749354  | 0.564805203792125 |         |          |                   |          | 34         |
| 106                                   |          | protein targeting to ER                                             |                      |                  |                   |         |          |                   |          |            |
| GO:0072599                            |          |                                                                     | 4.70222493290163e-54 | 157.06330749354  | 0.564805203792125 |         |          |                   |          | 34         |
| 106                                   |          | establishment of protein localization to endoplasmic reticulum      |                      |                  |                   |         |          |                   |          |            |
| GO:0070972                            |          |                                                                     | 3.428401168231e-52   | 134.512735326689 |                   |         |          | 0.628745415542177 |          |            |
| 34                                    | 118      | protein localization to endoplasmic reticulum                       |                      |                  |                   |         |          |                   |          |            |
| GO:0000184                            |          |                                                                     | 4.78577855377913e-52 | 132.920930232558 |                   |         |          | 0.634073766521348 |          |            |
| 34                                    | 119      | nuclear-transcribed mRNA catabolic process, nonsense-mediated decay |                      |                  |                   |         |          |                   |          |            |
| GO:0006414                            |          |                                                                     | 4.91924770692221e-52 | 148.979166666667 |                   |         |          | 0.559476852812954 |          |            |
| 33                                    | 105      | translational elongation                                            |                      |                  |                   |         |          |                   |          |            |
| GO:0006413                            |          |                                                                     | 6.14796341299922e-48 | 95.5270003941663 |                   |         |          | 0.809909348833991 |          |            |
| 34                                    | 152      | translational initiation                                            |                      |                  |                   |         |          |                   |          |            |
| GO:0006612                            |          |                                                                     | 7.88144496579286e-48 | 94.7176079734219 |                   |         |          | 0.815237699813162 |          |            |
| 34                                    | 153      | protein targeting to membrane                                       |                      |                  |                   |         |          |                   |          |            |
| GO:0034623                            |          |                                                                     | 1.18682145954065e-47 | 85.341726618705  | 0.927133070375753 |         |          |                   |          | 35         |
| 174                                   |          | cellular macromolecular complex disassembly                         |                      |                  |                   |         |          |                   |          |            |
| GO:0032984                            |          |                                                                     | 3.52072157385659e-47 | 82.349537037037  | 0.953774825271608 |         |          |                   |          | 35         |
| 179                                   |          | macromolecular complex disassembly                                  |                      |                  |                   |         |          |                   |          |            |
| GO:0072594                            |          |                                                                     | 7.0207651895783e-47  | 74.2473867595819 |                   |         |          | 1.08698359975088  |          |            |
| 36                                    | 204      | establishment of protein localization to organelle                  |                      |                  |                   |         |          |                   |          |            |
| GO:0000956                            |          |                                                                     | 3.31579657706314e-46 | 83.398105081826  | 0.900491315479898 |         |          |                   |          | 34         |
| 169                                   |          | nuclear-transcribed mRNA catabolic process                          |                      |                  |                   |         |          |                   |          |            |
| GO:0019080                            |          |                                                                     | 4.47185534298828e-46 | 90.6101694915254 |                   |         |          | 0.80458099785482  |          |            |
| 33                                    | 151      | viral genome expression                                             |                      |                  |                   |         |          |                   |          |            |
| GO:0019083                            |          |                                                                     | 4.47185534298828e-46 | 90.6101694915254 |                   |         |          | 0.80458099785482  |          |            |
| 33                                    | 151      | viral transcription                                                 |                      |                  |                   |         |          |                   |          |            |
| GO:0043624                            |          |                                                                     | 7.23932442857183e-46 | 89.0875          | 0.815237699813162 |         |          |                   | 33       | 153        |
|                                       |          | cellular protein complex disassembly                                |                      |                  |                   |         |          |                   |          |            |
| GO:0006402                            |          |                                                                     | 2.28648566589893e-45 | 78.1363049095607 |                   |         |          | 0.948446474292437 |          |            |
| 34                                    | 178      | mRNA catabolic process                                              |                      |                  |                   |         |          |                   |          |            |
| GO:0043241                            |          |                                                                     | 2.34076064577948e-45 | 85.494           | 0.841879454709017 |         |          |                   | 33       | 158        |
|                                       |          | protein complex disassembly                                         |                      |                  |                   |         |          |                   |          |            |
| GO:0006401                            |          |                                                                     | 4.11909201221411e-43 | 65.6741466068272 |                   |         |          | 1.09231195073005  |          |            |
| 34                                    | 205      | RNA catabolic process                                               |                      |                  |                   |         |          |                   |          |            |
| GO:0071845                            |          |                                                                     | 1.06961756697119e-39 | 47.2724230254351 |                   |         |          | 1.51325167808456  |          |            |
| 35                                    | 284      | cellular component disassembly at cellular level                    |                      |                  |                   |         |          |                   |          |            |
| GO:0019058                            |          |                                                                     | 1.7280090696582e-39  | 53.6969696969697 |                   |         |          | 1.2308490761885   |          | 33         |
| 231                                   |          | viral infectious cycle                                              |                      |                  |                   |         |          |                   |          |            |

Stable4\_20PerPair

|                                                        |                      |                                                                |                    |
|--------------------------------------------------------|----------------------|----------------------------------------------------------------|--------------------|
| GO:0022411                                             | 1.78061290578568e-39 | 46.5118577075099                                               | 1.53456508200125   |
| 35                                                     | 288                  | cellular component disassembly                                 |                    |
| GO:0022415                                             | 1.03803681237724e-37 | 46.7411894273128                                               | 1.38537125458446   |
| 33                                                     | 260                  | viral reproductive process                                     |                    |
| GO:0033365                                             | 1.09028316365855e-34 | 29.5702981651376                                               | 2.52031001314788   |
| 37                                                     | 473                  | protein localization to organelle                              |                    |
| GO:0006605                                             | 1.17930594278941e-34 | 29.5005148741419                                               | 2.52563836412705   |
| 37                                                     | 474                  | protein targeting                                              |                    |
| GO:0016032                                             | 1.62166457839337e-32 | 27.9607371794872                                               | 2.40308629160612   |
| 35                                                     | 451                  | viral reproduction                                             |                    |
| GO:0042274                                             | 3.05577230658442e-08 | 76.7147435897436                                               | 0.0959103176250778 |
| 5                                                      | 18                   | ribosomal small subunit biogenesis                             |                    |
| GO:0006364                                             | 7.65036914976698e-08 | 17.243961352657                                                | 0.554148501833783  |
| 104                                                    |                      | rRNA processing                                                | 8                  |
| GO:0042254                                             | 9.18032191699592e-08 | 13.456512605042                                                | 0.793924295896478  |
| 149                                                    |                      | ribosome biogenesis                                            | 9                  |
| GO:0016072                                             | 1.18618743017287e-07 | 16.2227905655016                                               | 0.586118607708809  |
| 8                                                      | 110                  | rRNA metabolic process                                         |                    |
| GO:0022613                                             | 3.02358418324044e-07 | 9.82922596320722                                               | 1.19887897031347   |
| 10                                                     | 225                  | ribonucleoprotein complex biogenesis                           |                    |
| GO:0071843                                             | 5.27308797462763e-07 | 9.21918790327837                                               | 1.27347588402187   |
| 10                                                     | 239                  | cellular component biogenesis at cellular level                |                    |
| GO:0030490                                             | 5.01355906814168e-06 | 145.641891891892                                               | 0.0372984568541969 |
| 3                                                      | 7                    | maturation of SSU-rRNA                                         |                    |
| GO:0034470                                             | 1.08732419864739e-05 | 8.56400966183575                                               | 1.0656701958342    |
| 200                                                    |                      | ncRNA processing                                               | 8                  |
| Tissue: Thyroid=>Adipose_Subcutaneous Type: asymmetric |                      |                                                                |                    |
| SourceGene: FSCN3(ENSG00000106328.8)                   |                      |                                                                |                    |
| TargetGeneSet:                                         | NMNAT1               | DFFA                                                           | SPEN               |
| RABGGTB                                                | RP4                  | RP11                                                           | HBXIP              |
| RPS27                                                  | PYG02                | MEF2D                                                          | ISG20L2            |
| DGUOK                                                  | COX5B                | SLC9A2                                                         | SPOPL              |
| DNAJC19                                                | RPL34                | SETD7                                                          | WWC2               |
| SYNPO                                                  | ZNF300               | C5orf25                                                        | GPLD1              |
| BAZ1B                                                  | CLDN3                | GTPBP10                                                        | TRIM56             |
| POLR2K                                                 | MED30                | TG                                                             | LY6D               |
| VDAC2                                                  | RPS24                | SNCG                                                           | AS3MT              |
| NDUFS3                                                 | MRPL16               | ALDH3B2                                                        | RSF1               |
| PFDN5                                                  | NACA                 | AVIL                                                           | SSH1               |
| PSME2                                                  | OIP5-AS1             |                                                                | RPS3AP6            |
| VPS53                                                  | TLCD2                | KDM6B                                                          | TMEM107            |
| RPL27                                                  | UBTF                 | ERN1                                                           | TNRC6C             |
| UQCRFS1                                                | KCNK6                | RPL18                                                          | ZNF264             |
| PFDN4                                                  | ATP50                | ICOSLG                                                         | MPST               |
| BCORL1                                                 | MT                   |                                                                | STS                |
| GOBPID                                                 | Pvalue               | OddsRatio                                                      | ExpCount           |
| GO:0006414                                             | 1.72261507924495e-27 | 39.429560401523                                                | 0.951837243097364  |
| 105                                                    |                      | translational elongation                                       | 24                 |
| GO:0006415                                             | 1.76542062947188e-27 | 44.6345315904139                                               | 0.824925610684382  |
| 23                                                     | 91                   | translational termination                                      |                    |
| GO:0006614                                             | 6.65790942945432e-26 | 36.9776422764228                                               | 0.951837243097364  |
| 23                                                     | 105                  | SRP-dependent cotranslational protein targeting to membrane    |                    |
| GO:0006613                                             | 8.44160722142093e-26 | 36.5295626952253                                               | 0.960902359698291  |
| 23                                                     | 106                  | cotranslational protein targeting to membrane                  |                    |
| GO:0045047                                             | 8.44160722142093e-26 | 36.5295626952253                                               | 0.960902359698291  |
| 23                                                     | 106                  | protein targeting to ER                                        |                    |
| GO:0072599                                             | 8.44160722142093e-26 | 36.5295626952253                                               | 0.960902359698291  |
| 23                                                     | 106                  | establishment of protein localization to endoplasmic reticulum |                    |
| GO:0019080                                             | 7.26053316034125e-25 | 26.568583408206                                                | 1.36883260674002   |
| 151                                                    |                      | viral genome expression                                        | 25                 |
| GO:0019083                                             | 7.26053316034125e-25 | 26.568583408206                                                | 1.36883260674002   |
| 151                                                    |                      | viral transcription                                            | 25                 |
| GO:0006413                                             | 8.62794227092081e-25 | 26.3575248848611                                               | 1.37789772334095   |

STable4\_20PerPair

|            |     |                                                                     |                  |                  |  |                   |    |  |
|------------|-----|---------------------------------------------------------------------|------------------|------------------|--|-------------------|----|--|
| 25         | 152 | translational initiation                                            |                  |                  |  |                   |    |  |
| GO:0070972 |     | 1.20810811690048e-24                                                | 31.8884015594542 |                  |  | 1.06968375890942  |    |  |
| 23         | 118 | protein localization to endoplasmic reticulum                       |                  |                  |  |                   |    |  |
| GO:0000184 |     | 1.4867530081339e-24                                                 | 31.554012345679  | 1.07874887551035 |  |                   | 23 |  |
| 119        |     | nuclear-transcribed mRNA catabolic process, nonsense-mediated decay |                  |                  |  |                   |    |  |
| GO:0043624 |     | 2.63788859273469e-23                                                | 24.6746359487068 |                  |  | 1.38696283994187  |    |  |
| 24         | 153 | cellular protein complex disassembly                                |                  |                  |  |                   |    |  |
| GO:0034623 |     | 2.85741956529368e-23                                                | 22.4309864505508 |                  |  | 1.57733028856135  |    |  |
| 25         | 174 | cellular macromolecular complex disassembly                         |                  |                  |  |                   |    |  |
| GO:0043241 |     | 5.86700946048458e-23                                                | 23.7455712093737 |                  |  | 1.43228842294651  |    |  |
| 24         | 158 | protein complex disassembly                                         |                  |                  |  |                   |    |  |
| GO:0032984 |     | 5.90363735413787e-23                                                | 21.6950502327861 |                  |  | 1.62265587156598  |    |  |
| 25         | 179 | macromolecular complex disassembly                                  |                  |                  |  |                   |    |  |
| GO:0000956 |     | 3.09189014661989e-22                                                | 21.9271672574927 |                  |  | 1.53200470555671  |    |  |
| 24         | 169 | nuclear-transcribed mRNA catabolic process                          |                  |                  |  |                   |    |  |
| GO:0006612 |     | 6.41441462649512e-22                                                | 23.2457264957265 |                  |  | 1.38696283994187  |    |  |
| 23         | 153 | protein targeting to membrane                                       |                  |                  |  |                   |    |  |
| GO:0006402 |     | 1.10239174416829e-21                                                | 20.632601043816  | 1.61359075496505 |  |                   | 24 |  |
| 178        |     | mRNA catabolic process                                              |                  |                  |  |                   |    |  |
| GO:0019058 |     | 2.13772651322195e-21                                                | 17.0494773519164 |                  |  | 2.0940419348142   | 26 |  |
| 231        |     | viral infectious cycle                                              |                  |                  |  |                   |    |  |
| GO:0072594 |     | 2.98938399073077e-20                                                | 17.619937694704  | 1.84928378658916 |  |                   | 24 |  |
| 204        |     | establishment of protein localization to organelle                  |                  |                  |  |                   |    |  |
| GO:0006401 |     | 3.36142128074374e-20                                                | 17.5213507512779 |                  |  | 1.85834890319009  |    |  |
| 24         | 205 | RNA catabolic process                                               |                  |                  |  |                   |    |  |
| GO:0022415 |     | 4.45590464750292e-20                                                | 14.9058201058201 |                  |  | 2.35693031624109  |    |  |
| 26         | 260 | viral reproductive process                                          |                  |                  |  |                   |    |  |
| GO:0071845 |     | 4.17372903084162e-19                                                | 13.4961978589886 |                  |  | 2.57449311466334  |    |  |
| 26         | 284 | cellular component disassembly at cellular level                    |                  |                  |  |                   |    |  |
| GO:0022411 |     | 5.93462448425613e-19                                                | 13.2863685932388 |                  |  | 2.61075358106705  |    |  |
| 26         | 288 | cellular component disassembly                                      |                  |                  |  |                   |    |  |
| GO:0016032 |     | 4.70061871788295e-17                                                | 9.36348852337143 |                  |  | 4.0883675870182   | 29 |  |
| 451        |     | viral reproduction                                                  |                  |                  |  |                   |    |  |
| GO:0033365 |     | 7.65497108572481e-13                                                | 7.30289757412399 |                  |  | 4.2878001522386   | 25 |  |
| 473        |     | protein localization to organelle                                   |                  |                  |  |                   |    |  |
| GO:0006605 |     | 8.02267033340791e-13                                                | 7.28610749254108 |                  |  | 4.29686526883953  |    |  |
| 25         | 474 | protein targeting                                                   |                  |                  |  |                   |    |  |
| GO:0022904 |     | 2.499126848136e-06                                                  | 10.5188470066519 |                  |  | 0.870251193689018 |    |  |
| 8          | 96  | respiratory electron transport chain                                |                  |                  |  |                   |    |  |
| GO:0022613 |     | 6.29876814588043e-06                                                | 6.04228971962617 |                  |  | 2.03965123520864  |    |  |
| 11         | 225 | ribonucleoprotein complex biogenesis                                |                  |                  |  |                   |    |  |
| GO:0042254 |     | 8.39393584807817e-06                                                | 7.47189695550351 |                  |  | 1.35070237353816  |    |  |
| 9          | 149 | ribosome biogenesis                                                 |                  |                  |  |                   |    |  |
| GO:0071843 |     | 1.11563267010338e-05                                                | 5.6656432748538  | 2.16656286762162 |  |                   | 11 |  |
| 239        |     | cellular component biogenesis at cellular level                     |                  |                  |  |                   |    |  |
| GO:0042274 |     | 1.7884689744967e-05                                                 | 32.1844769403825 |                  |  | 0.163172098816691 |    |  |
| 4          | 18  | ribosomal small subunit biogenesis                                  |                  |                  |  |                   |    |  |

Tissue: Adipose\_Subcutaneous=>Thyroid Type: asymmetric

SourceGene: OSBP(ENSG00000110048.6)

|                |          |         |         |           |          |        |         |         |        |      |
|----------------|----------|---------|---------|-----------|----------|--------|---------|---------|--------|------|
| TargetGeneSet: | NOL9     | DFFA    | DNAJC16 | SPEN      | KIAA0090 | ALPL   | TCEB3   | NUDC    |        |      |
| GPR3           | EYA3     | GMEB1   | SNRNP40 | KPNA7     | TMEM234  | TXLNA  | EIF2C3  | THRAP3  | FHL3   |      |
| IP013          | DPH2     | TOE1    | CCDC17  | RPS15AP10 |          | RP11   | ST7L    | WDR3    | PIAS3  |      |
| GOLPH3L        | ADAR     | PYG02   | CCT3    | METTL13   | URB2     | HEATR1 | KIF3C   | EIF2B4  | WDR43  | MSH6 |
| CCT4           | TCEB1P21 |         | POLR1A  | ZNF2      | LMAN2L   | POU3F3 | POLR1B  | MYO7B   | RBP4   |      |
| AMMECR1L       |          | CLN5    | C3orf19 | CMC1      | MYD88    | SCN5A  | IP6K1   | RRP9    | ACTR8  | GMPS |
| SH3BP2         | NOP14    | SRP72   | NUP155  | SKIV2L2   | HSPA4    | HARS   | MFAP3   | HRH2    | NOP16  | C4B  |
| PFDN6          | ZBTB9    | BYSL    | TAF8    | RPL7L1    | POLR1C   | TRAM2  | EIF3B   | C7orf26 | CCT6A  | TBL2 |
| POM121C        | ZKSCAN5  | ZKSCAN1 | MEPCE   | AGFG2     | KLHDC10  | CNOT4  | ABCF2   | NOM1    | NEIL2  | XPO7 |
| POLR3D         | ELP3     | EXTL3   | LSM12P1 | PRKDC     | SULF1    | ZNF706 | BAALC   | PLAA    | DNAJA1 | NOL6 |
| STOML2         | TBC1D13  | NUP188  | EXOSC2  | GTF3C4    | QSOX2    | NGB    | BMS1    | HNRNPF  | FAM35B |      |
| POLR3A         | SFTPD    | ENTPD7  | CHUK    | C10orf2   | BTRC     | PPRC1  | NOLC1   | PDCD11  | CTR9   |      |
| SPTY2D1        | CAPRIN1  | NAT10   | CTD     | HARBI1    | OSBP     | MTA2   | GNG3    | STX5    | WDR74  |      |
| C11orf95       |          | MARK2   | STIP1   | DPF2      | U4       | IL18BP | ANKRD42 | MRE11A  | ZNF259 | DDX6 |

Stable4\_20PerPair

|        |          |          |          |         |         |           |         |        |         |      |
|--------|----------|----------|----------|---------|---------|-----------|---------|--------|---------|------|
| ZNF202 | FKBP4    | ZCRB1    | SCAF11   | DDX23   | PA2G4   | OBFC2B    | KIF5A   | CAND1  | KRT8P22 |      |
| SART3  | ATXN2    | GCN1L1   | HSPH1    | NUFIP1  | RBM23   | PRMT5-AS1 | PRMT5   | RNF31  | RP4     |      |
| NEK9   | CYP46A1  | C15orf57 |          | TUBGCP4 | MFAP1   | DUOXA1    | DUOX1   | PIGB   | CSNK1G1 | ULK3 |
| CHRNA5 | C16orf73 |          | THUMP1   | PPP4C   | CD2BP2  | ZNF785    | ZNF629  | DNAJA2 | GFOD2   |      |
| CIRH1A | DHODH    | VPS53    | TSR1     | TP53    | TMEM199 | CTB       | TP53I13 | GOSR1  | UTP6    | NLE1 |
| PSME3  | AOC2     | DHX8     | EFTUD2   | GFAP    | SNX11   | UBE2Z     | VEZF1   | APPBP2 | FTSJ3   |      |
| PSMC5  | CEP76    | ZNF24    | FAM108A1 |         | ZNF77   | TNFSF14   | ZNF121  | ZNF562 | SYCE2   |      |
| DNAJB1 | ZNF790   | ZNF585B  | FBL      | KCNJ14  | JOSD2   | ZNF613    | ZNF614  | ZNF347 | ZNF542  |      |
| ZNF582 | ZNF543   | ZNF17    | ZNF749   | ZNF587  | ZNF417  | ZNF8      | NOP56   | AHCY   | SRSF6   |      |
| RIMS4  | NCOA5    | GTPBP5   | C20orf11 |         | GART    | COL18A1   | ZNF70   | BCRP3  | TFIP11  |      |
| TTC28  | NF2      | PES1     | C22orf23 |         | ADSL    | XPNPEP3   | ZNF81   | PQBP1  | GNL3L   |      |
| FRMPD3 | UTP14A   |          |          |         |         |           |         |        |         |      |

| GO:0071843               | Pvalue   | OddsRatio            | ExpCount         | Count             | Size | Term             |  |
|--------------------------|----------|----------------------|------------------|-------------------|------|------------------|--|
| 239                      | cellular | 3.85252355044714e-22 | 12.39983436853   | 3.42350010379905  |      | 32               |  |
| GO:0022613               | 225      | 7.56635125155855e-22 | 12.7562675726336 |                   |      | 3.22296034876479 |  |
| 31                       | 225      |                      |                  |                   |      |                  |  |
| GO:0042254               | 149      | 2.02701796015587e-16 | 13.2187273888061 |                   |      | 2.13431596429313 |  |
| 22                       | 149      |                      |                  |                   |      |                  |  |
| GO:0006364               | 104      | 1.53815483121709e-12 | 13.4754878629224 |                   |      | 1.48972389454017 |  |
| 16                       | 104      |                      |                  |                   |      |                  |  |
| GO:0016072               | 110      | 3.75266354500608e-12 | 12.6100033418737 |                   |      | 1.57566950384056 |  |
| 16                       | 110      |                      |                  |                   |      |                  |  |
| GO:0034470               | 200      | 2.93591071729606e-08 | 6.40109264739358 |                   |      | 2.86485364334648 |  |
| 16                       | 200      |                      |                  |                   |      |                  |  |
| GO:0022618               | 95       | 1.08997984511789e-07 | 9.46064139941691 |                   |      | 1.36080548058958 |  |
| 11                       | 95       |                      |                  |                   |      |                  |  |
| GO:0034660               | 285      | 1.49143407056048e-07 | 4.98555377207063 |                   |      | 4.08241644176874 |  |
| 18                       | 285      |                      |                  |                   |      |                  |  |
| GO:0071826               | 100      | 1.85738005062477e-07 | 8.92599174501261 |                   |      | 1.43242682167324 |  |
| 11                       | 100      |                      |                  |                   |      |                  |  |
| GO:0006397               | 399      | 4.77018739622153e-06 | 3.68723404255319 |                   |      | 5.71538301847623 |  |
| 19                       | 399      |                      |                  |                   |      |                  |  |
| GO:0000377               | 204      | 7.67200425713932e-06 | 4.93034490203487 |                   |      | 2.92215071621341 |  |
| 13                       | 204      |                      |                  |                   |      |                  |  |
| adenosine as nucleophile |          |                      |                  |                   |      |                  |  |
| GO:0000398               | 204      | 7.67200425713932e-06 | 4.93034490203487 |                   |      | 2.92215071621341 |  |
| 13                       | 204      |                      |                  |                   |      |                  |  |
| GO:0000375               | 209      | 9.96691757170118e-06 | 4.80286135072586 |                   |      | 2.99377205729707 |  |
| 13                       | 209      |                      |                  |                   |      |                  |  |
| GO:0000460               |          | 1.85010637569267e-05 | 35.064039408867  | 0.171891218600789 |      | 4                |  |
| 12                       |          |                      |                  |                   |      |                  |  |

Tissue: Thyroid=>Adipose\_Subcutaneous Type: asymmetric

SourceGene: PRINS(ENSG00000238115.1)

TargetGeneSet: MTND1P23 MTND2P28 RPL22 NMNAT1 UBE4B DFFA SPEN

|           |          |           |          |           |           |         |          |          |          |      |
|-----------|----------|-----------|----------|-----------|-----------|---------|----------|----------|----------|------|
| LDLRAD2   | HSPG2    | RPL11     | ARID1A   | WASF2     | DNAJC8    | EIF2C1  | THRAP3   | MFI2     | RPS8     |      |
| NEDD4     | RP11     | RPL5      | HBXIP    | NUDT4P1   | HIST2H2AC | RPRD2   | JTB      | RPS27    |          |      |
| ASH1L     | MIR555   | PIGM      | TKT      | PRRC2C    | ZBTB37    | CEP350  | ARPC5    | PTPN14   | ZC3H11B  | ADI1 |
| RPS7      | ASXL2    | C2orf18   | CALM2    | RPL36AP15 | UBC       | USP34   | COMMD1   | C1D      | AAK1     |      |
| DGUOK-AS1 |          | TET3      | DCTN1    | VAMP5     | TMEM131   | EIF5B   | UGGT1    | MZT2B    | RHOQP3   |      |
| H3F3AP4   | ANKRD44  | RAPH1     | TRIP12   | PSMD1     | GIGYF2    | HDLBP   | NR2C2    | UBE2E2   | RPL15    |      |
| TRANK1    | WDR48    | HIGD1A    | MAP4     | RAD54L2   | RPL29     | DCP1A   | NIT2     | PCNP     | RPL24    |      |
| FAM162A   | NME9     | COMMD2    | PDCD10   | PHC3      | PEX5L     | DNAJC19 | HTT      | BOD1L    | RELL1    |      |
| DANCR     | LAMTOR3  | RPL34     | SETD7    | H3F3AP6   | RPS3A     | MARCH6  | NIPBL    | CTD      | SREK1IP1 |      |
| MRPS36    | TAF9     | SERINC5   | ERAP1    | HINT1     | C5orf15   | SKP1    | CTB      | MTND5P11 |          |      |
| CDC23     | RPS14    | ATP6V0E1  |          | GNB2L1    | TXNDC5    | TMEM14C | RPL15P3  | NOL7     | PPIAP29  |      |
| ZSCAN23   | SYNGAP1  | MNF1      | RP1      | UHRF1BP1  |           | RPL10A  | MTRNR2L9 |          | WDR11    |      |
| BCKDHB    | C6orf162 |           | KIAA1919 |           | PHACTR2   | IGF2R   | SFT2D1   | FOXK1    | EEF1A1P6 |      |
| MPLKIP    | CHCHD2   | DPY19L2P4 |          | RPS3AP26  |           | TRIM56  | PIK3CG   | COG5     | CAPZA2   |      |
| METTL2A   | ZC3HAV1L |           | HIPK2    | MLL3      | DRP2      | HMBX1   | DCTN6    | LSM1     | HOOK3    |      |
| RPS20     | POLR2K   | UBR5      | EIF3E    | MED30     | TG        | RGPI    | CLTA     | CBWD6    | CBWD3    |      |
| ATP6V1G1  |          | GAPVD1    | RPL12    | NUP214    | PRRC2B    | SETX    | RPL7A    | PRINS    | FUT11    |      |
| RPS24     | RPS3AP5  | EIF6      | RPL27A   | MTRNR2L8  |           | TSG101  | TRIM44   | CKAP5    | TMEM126B |      |

Stable4\_20PerPair

| GO:ID                                              | Gene                                                           | Pvalue                                                              | OddsRatio | ExpCount         | Count            | Size             | Term |
|----------------------------------------------------|----------------------------------------------------------------|---------------------------------------------------------------------|-----------|------------------|------------------|------------------|------|
| GO:0006415                                         | BACE1                                                          | 7.33765796271195e-39                                                |           | 45.2089314194577 |                  | 1.39166839665075 |      |
| 34                                                 | 91                                                             | translational termination                                           |           |                  |                  |                  |      |
| GO:0006614                                         | GNS                                                            | 6.26152776488408e-38                                                |           | 38.0645161290323 |                  | 1.60577122690471 |      |
| 35                                                 | 105                                                            | SRP-dependent cotranslational protein targeting to membrane         |           |                  |                  |                  |      |
| GO:0006613                                         | RPSAP54                                                        | 9.23046030882955e-38                                                |           | 37.525745873088  | 1.62106428620857 |                  | 35   |
| 106                                                | cotranslational protein targeting to membrane                  |                                                                     |           |                  |                  |                  |      |
| GO:0045047                                         | C14orf142                                                      | 9.23046030882955e-38                                                |           | 37.525745873088  | 1.62106428620857 |                  | 35   |
| 106                                                | protein targeting to ER                                        |                                                                     |           |                  |                  |                  |      |
| GO:0072599                                         | C15orf40                                                       | 9.23046030882955e-38                                                |           | 37.525745873088  | 1.62106428620857 |                  | 35   |
| 106                                                | establishment of protein localization to endoplasmic reticulum |                                                                     |           |                  |                  |                  |      |
| GO:0000184                                         | SEC11A                                                         | 2.99269513480796e-37                                                |           | 33.1678280690329 |                  | 1.81987405715867 |      |
| 36                                                 | 119                                                            | nuclear-transcribed mRNA catabolic process, nonsense-mediated decay |           |                  |                  |                  |      |
| GO:0006414                                         | MPG                                                            | 2.34027871483817e-36                                                |           | 36.258642765685  | 1.60577122690471 |                  | 34   |
| 105                                                | translational elongation                                       |                                                                     |           |                  |                  |                  |      |
| GO:0070972                                         | SPSB3                                                          | 6.98358439932385e-36                                                |           | 32.0731312346159 |                  | 1.80458099785482 |      |
| 35                                                 | 118                                                            | protein localization to endoplasmic reticulum                       |           |                  |                  |                  |      |
| GO:0000956                                         | NDUFB10                                                        | 2.99556436540263e-35                                                |           | 23.2417582417582 |                  | 2.58452702235139 |      |
| 39                                                 | 169                                                            | nuclear-transcribed mRNA catabolic process                          |           |                  |                  |                  |      |
| GO:0019080                                         | RPL18                                                          | 1.69538391784688e-34                                                |           | 24.8995041952708 |                  | 2.30925195488201 |      |
| 37                                                 | 151                                                            | viral genome expression                                             |           |                  |                  |                  |      |
| GO:0019083                                         | BCAT2                                                          | 1.69538391784688e-34                                                |           | 24.8995041952708 |                  | 2.30925195488201 |      |
| 37                                                 | 151                                                            | viral transcription                                                 |           |                  |                  |                  |      |
| GO:0006402                                         | RP4                                                            | 2.62958091883432e-34                                                |           | 21.7230215827338 |                  | 2.72216455608608 |      |
| 39                                                 | 178                                                            | mRNA catabolic process                                              |           |                  |                  |                  |      |
| GO:0006413                                         | APOL6                                                          | 5.39434674311892e-33                                                |           | 23.6767940354147 |                  | 2.32454501418587 |      |
| 36                                                 | 152                                                            | translational initiation                                            |           |                  |                  |                  |      |
| GO:0006401                                         | RPL3                                                           | 8.735982473712e-32                                                  |           | 18.1549053356282 |                  | 3.13507715729015 |      |
| 39                                                 | 205                                                            | RNA catabolic process                                               |           |                  |                  |                  |      |
| GO:0006612                                         | RPL17                                                          | 1.615353405929e-31                                                  |           | 22.5041006014215 |                  | 2.33983807348972 |      |
| 35                                                 | 153                                                            | protein targeting to membrane                                       |           |                  |                  |                  |      |
| GO:0043624                                         | NUCB1-AS1                                                      | 1.615353405929e-31                                                  |           | 22.5041006014215 |                  | 2.33983807348972 |      |
| 35                                                 | 153                                                            | cellular protein complex disassembly                                |           |                  |                  |                  |      |
| GO:0022415                                         | RPL13A                                                         | 3.6452905487949e-31                                                 |           | 15.0813387319973 |                  | 3.97619541900215 |      |
| 42                                                 | 260                                                            | viral reproductive process                                          |           |                  |                  |                  |      |
| GO:0043241                                         | TMEM230                                                        | 5.40034035051794e-31                                                |           | 21.5816504939243 |                  | 2.416303370009   | 35   |
| 158                                                | protein complex disassembly                                    |                                                                     |           |                  |                  |                  |      |
| GO:0034623                                         | KIF3B                                                          | 9.81317478602205e-31                                                |           | 19.8712103407756 |                  | 2.66099231887067 |      |
| 36                                                 | 174                                                            | cellular macromolecular complex disassembly                         |           |                  |                  |                  |      |
| GO:0072594                                         | NF2                                                            | 1.29617062208105e-30                                                |           | 17.592731582066  | 3.1197840979863  | 38               | 204  |
| establishment of protein localization to organelle |                                                                |                                                                     |           |                  |                  |                  |      |
| GO:0032984                                         | EP300                                                          | 2.8715111329249e-30                                                 |           | 19.1696087696088 |                  | 2.73745761538994 |      |
| 36                                                 | 179                                                            | macromolecular complex disassembly                                  |           |                  |                  |                  |      |
| GO:0019058                                         | RPL23A                                                         | 1.05483846835524e-29                                                |           | 15.6674107142857 |                  | 3.53269669919037 |      |
| 39                                                 | 231                                                            | viral infectious cycle                                              |           |                  |                  |                  |      |
| GO:0016032                                         | EP300                                                          | 3.86713719436514e-28                                                |           | 9.79943306722203 |                  | 6.89716974603834 |      |
| 49                                                 | 451                                                            | viral reproduction                                                  |           |                  |                  |                  |      |
| GO:0071845                                         | EP300                                                          | 3.32954327223926e-26                                                |           | 12.231778425656  | 4.34322884229465 |                  | 39   |
| 284                                                | cellular component disassembly at cellular level               |                                                                     |           |                  |                  |                  |      |
| GO:0022411                                         | EP300                                                          | 5.68518374756703e-26                                                |           | 12.0318416523236 |                  | 4.40440107951007 |      |

Stable4\_20PerPair

|                                       |           |                                                             |                  |                  |           |           |          |          |                    |      |
|---------------------------------------|-----------|-------------------------------------------------------------|------------------|------------------|-----------|-----------|----------|----------|--------------------|------|
| 39                                    | 288       | cellular component disassembly                              |                  |                  |           |           |          |          |                    |      |
| GO:0033365                            |           | 1.74772767289841e-22                                        | 7.99710270896712 |                  |           |           |          |          | 7.23361705072313   |      |
| 44                                    | 473       | protein localization to organelle                           |                  |                  |           |           |          |          |                    |      |
| GO:0006605                            |           | 1.51247769006523e-21                                        | 7.7342605385959  | 7.24891011002699 |           |           |          |          | 43                 |      |
| 474                                   |           | protein targeting                                           |                  |                  |           |           |          |          |                    |      |
| GO:0006511                            |           | 8.13314886944853e-07                                        | 4.01654518107139 |                  |           |           |          |          | 5.566673586603 20  |      |
| 364                                   |           | ubiquitin-dependent protein catabolic process               |                  |                  |           |           |          |          |                    |      |
| GO:0019941                            |           | 1.09436102136724e-06                                        | 3.93445876032941 |                  |           |           |          |          | 5.67372500172998   |      |
| 20                                    | 371       | modification-dependent protein catabolic process            |                  |                  |           |           |          |          |                    |      |
| GO:0043632                            |           | 1.23993118404523e-06                                        | 3.90027264805914 |                  |           |           |          |          | 5.71960417964155   |      |
| 20                                    | 374       | modification-dependent macromolecule catabolic process      |                  |                  |           |           |          |          |                    |      |
| GO:0051603                            |           | 2.26947503386426e-06                                        | 3.73768016287128 |                  |           |           |          |          | 5.94900006919936   |      |
| 20                                    | 389       | proteolysis involved in cellular protein catabolic process  |                  |                  |           |           |          |          |                    |      |
| GO:0044257                            |           | 3.73596844110694e-06                                        | 3.60709541298742 |                  |           |           |          |          | 6.14780984014947   |      |
| 20                                    | 402       | cellular protein catabolic process                          |                  |                  |           |           |          |          |                    |      |
| GO:0022613                            |           | 9.54713578926652e-06                                        | 4.49357785562195 |                  |           |           |          |          | 3.44093834336724   |      |
| 14                                    | 225       | ribonucleoprotein complex biogenesis                        |                  |                  |           |           |          |          |                    |      |
| GO:0042254                            |           | 1.81476997840804e-05                                        | 5.34893029675638 |                  |           |           |          |          | 2.27866583627431   |      |
| 11                                    | 149       | ribosome biogenesis                                         |                  |                  |           |           |          |          |                    |      |
| GO:0071843                            |           | 1.88730436687949e-05                                        | 4.20976918947933 |                  |           |           |          |          | 3.6550411736212 14 |      |
| 239                                   |           | cellular component biogenesis at cellular level             |                  |                  |           |           |          |          |                    |      |
| Tissue: Thyroid=>Adipose_Subcutaneous |           | Type: cluster                                               |                  |                  |           |           |          |          |                    |      |
| SourceGene:                           |           | PRINS(ENSG00000238115.1)                                    |                  |                  |           |           |          |          |                    |      |
| TargetGeneSet:                        |           | MTND1P23                                                    | MTND2P28         | RPL22            | NMNAT1    | UBE4B     | DFFA     | SPEN     |                    |      |
| LDLRAD2                               | HSPG2     | RPL11                                                       | ARID1A           | WASF2            | DNAJC8    | EIF2C1    | THRAP3   | MFI2     | RPS8               |      |
| NEDD4                                 | RP11      | RPL5                                                        | HBXIP            | NUDT4P1          | HIST2H2AC |           | RPRD2    | JTB      | RPS27              |      |
| ASH1L                                 | MIR555    | PIGM                                                        | TKT              | PRRC2C           | ZBTB37    | CEP350    | ARPC5    | PTPN14   | ZC3H11B            | ADI1 |
| RPS7                                  | ASXL2     | C2orf18                                                     | CALM2            | RPL36AP15        |           | UBC       | USP34    | COMMD1   | C1D                | AAK1 |
| DGUOK-AS1                             |           | TET3                                                        | DCTN1            | VAMP5            | TMEM131   | EIF5B     | UGGT1    | MZT2B    | RHOQP3             |      |
| H3F3AP4                               | ANKRD44   | RAPH1                                                       | TRIP12           | PSMD1            | GIGYF2    | HDLBP     | NR2C2    | UBE2E2   | RPL15              |      |
| TRANK1                                | WDR48     | HIGD1A                                                      | MAP4             | RAD54L2          | RPL29     | DCP1A     | NIT2     | PCNP     | RPL24              |      |
| FAM162A                               | NME9      | COMMD2                                                      | PDCD10           | PHC3             | PEX5L     | DNAJC19   | HTT      | BOD1L    | RELL1              |      |
| DANCR                                 | LAMTOR3   | RPL34                                                       | SETD7            | H3F3AP6          | RPS3A     | MARCH6    | NIPBL    | CTD      | SREK1IP1           |      |
| MRPS36                                | TAF9      | SERINC5                                                     | ERAP1            | HINT1            | C5orf15   | SKP1      | CTB      | MTND5P11 |                    |      |
| CDC23                                 | RPS14     | ATP6V0E1                                                    |                  | GNB2L1           | TXNDC5    | TMEM14C   | RPL15P3  | NOL7     | PPIAP29            |      |
| ZSCAN23                               | SYNGAP1   | MNF1                                                        | RP1              | UHRF1BP1         |           | RPL10A    | MTRNR2L9 |          | WDR11              |      |
| BCKDHB                                | C6orf162  |                                                             | KIAA1919         | PHACTR2          | IGF2R     | SFT2D1    | FOXK1    | EEF1A1P6 |                    |      |
| MPLKIP                                | CHCHD2    | DPY19L2P4                                                   |                  | RPS3AP26         | TRIM56    | PIK3CG    | COG5     | CAZPA2   |                    |      |
| METTL2A                               | ZC3HAV1L  |                                                             | HIPK2            | MLL3             | DRP2      | HMBOX1    | DCTN6    | LSM1     | HOOK3              |      |
| RPS20                                 | POLR2K    | UBR5                                                        | EIF3E            | MED30            | TG        | RGP1      | CLTA     | CBWD6    | CBWD3              |      |
| ATP6V1G1                              |           | GAPVD1                                                      | RPL12            | NUP214           | PRRC2B    | SETX      | RPL7A    | PRINS    | FUT11              |      |
| RPS24                                 | RPS3AP5   | EIF6                                                        | RPL27A           | MTRNR2L8         |           | TSG101    | TRIM44   | CKAP5    | TMEM126B           |      |
| SDHD                                  | BACE1     | UBE4A                                                       | DDX6             | EEF1A1P33        |           | SCAF11    | MLL4     | PFDN5    | CBX5               | NACA |
| LRP1                                  | GNS       | EEA1                                                        | USP44            | GIT2             | RPL6      | PEBP1     | COX6A1   | MLXIP    | SBN01              |      |
| GOLGA3                                | RPSAP54   | MZT1                                                        | COMMD6           | COL4A2           | CCNB1IP1  |           | C14orf21 |          | ACTR10             |      |
| MNAT1                                 | C14orf142 |                                                             | CCNK             | TJP1             | HERC2P10  |           | SNAP23   | B2M      | GTF2A2             | RPL4 |
| MYO9A                                 | C15orf40  |                                                             | SEC11A           | MPG              | SPSB3     | NDUFB10   | RPS15A   | SULT1A3  | SRCAP              |      |
| NFATC3                                | ATXN1L    | HSBP1                                                       | MNT              | RPL26            | TOM1L2    | USP22     | RPL23A   | TAOK1    | CPD                | RFFL |
| TAF15                                 | RPL19     | CDK12                                                       | WIPF2            | RPL27            | RPS7P11   | RPS2P48   | CLTC     | SUMO2    | TNRC6C             |      |
| ROCK1P1                               | MYL12A    | MYL12B                                                      | ANKRD12          | C18orf32         |           | RPL17     | NFIC     | NDUFA11  | BRD4               |      |
| SLC35E1                               | SDHAF1    | ZNF585A                                                     | KCNK6            | RPL18            | BCAT2     | NUCB1-AS1 |          | RPL13A   | KLK7               |      |
| ZNF264                                | ZNF587    | RPS5                                                        | TMEM230          | KIF3B            | RP4       | NCOA3     | ADNP     | TSHZ2    | RPL12P4            | SON  |
| VWFP1                                 | THAP7     | HMGB1P10                                                    |                  | NF2              | APOL6     | RPL3      | EP300    | TCF20    | RNU12-2P           |      |
| USP9X                                 | RP6       | HSD17B10                                                    |                  | HUWE1            | GNL3L     | RPS4X     | TTC3P1   | COX7B    | PGAM4              |      |
| ITM2A                                 | APOOL     | RPL39                                                       | HCFC1            | RPL10            | FUNDC2    | MT        |          |          |                    |      |
| GOBPID                                | Pvalue    | OddsRatio                                                   | ExpCount         | Count            | Size      | Term      |          |          |                    |      |
| GO:0006415                            |           | 7.33765796271195e-39                                        | 45.2089314194577 |                  |           |           |          |          | 1.39166839665075   |      |
| 34                                    | 91        | translational termination                                   |                  |                  |           |           |          |          |                    |      |
| GO:0006614                            |           | 6.26152776488408e-38                                        | 38.0645161290323 |                  |           |           |          |          | 1.60577122690471   |      |
| 35                                    | 105       | SRP-dependent cotranslational protein targeting to membrane |                  |                  |           |           |          |          |                    |      |
| GO:0006613                            |           | 9.23046030882955e-38                                        | 37.525745873088  | 1.62106428620857 |           |           |          |          | 35                 |      |
| 106                                   |           | cotranslational protein targeting to membrane               |                  |                  |           |           |          |          |                    |      |
| GO:0045047                            |           | 9.23046030882955e-38                                        | 37.525745873088  | 1.62106428620857 |           |           |          |          | 35                 |      |

STable4\_20PerPair

|            |                                                                         |                      |                  |                  |    |     |
|------------|-------------------------------------------------------------------------|----------------------|------------------|------------------|----|-----|
| 106        | protein targeting to ER                                                 |                      |                  |                  |    |     |
| GO:0072599 |                                                                         | 9.23046030882955e-38 | 37.525745873088  | 1.62106428620857 |    | 35  |
| 106        | establishment of protein localization to endoplasmic reticulum          |                      |                  |                  |    |     |
| GO:0000184 |                                                                         | 2.99269513480796e-37 | 33.1678280690329 | 1.81987405715867 |    |     |
| 36         | 119 nuclear-transcribed mRNA catabolic process, nonsense-mediated decay |                      |                  |                  |    |     |
| GO:0006414 |                                                                         | 2.34027871483817e-36 | 36.258642765685  | 1.60577122690471 |    | 34  |
| 105        | translational elongation                                                |                      |                  |                  |    |     |
| GO:0070972 |                                                                         | 6.98358439932385e-36 | 32.0731312346159 | 1.80458099785482 |    |     |
| 35         | 118 protein localization to endoplasmic reticulum                       |                      |                  |                  |    |     |
| GO:0000956 |                                                                         | 2.99556436540263e-35 | 23.2417582417582 | 2.58452702235139 |    |     |
| 39         | 169 nuclear-transcribed mRNA catabolic process                          |                      |                  |                  |    |     |
| GO:0019080 |                                                                         | 1.69538391784688e-34 | 24.8995041952708 | 2.30925195488201 |    |     |
| 37         | 151 viral genome expression                                             |                      |                  |                  |    |     |
| GO:0019083 |                                                                         | 1.69538391784688e-34 | 24.8995041952708 | 2.30925195488201 |    |     |
| 37         | 151 viral transcription                                                 |                      |                  |                  |    |     |
| GO:0006402 |                                                                         | 2.62958091883432e-34 | 21.7230215827338 | 2.72216455608608 |    |     |
| 39         | 178 mRNA catabolic process                                              |                      |                  |                  |    |     |
| GO:0006413 |                                                                         | 5.39434674311892e-33 | 23.6767940354147 | 2.32454501418587 |    |     |
| 36         | 152 translational initiation                                            |                      |                  |                  |    |     |
| GO:0006401 |                                                                         | 8.735982473712e-32   | 18.1549053356282 | 3.13507715729015 |    |     |
| 39         | 205 RNA catabolic process                                               |                      |                  |                  |    |     |
| GO:0006612 |                                                                         | 1.615353405929e-31   | 22.5041006014215 | 2.33983807348972 |    |     |
| 35         | 153 protein targeting to membrane                                       |                      |                  |                  |    |     |
| GO:0043624 |                                                                         | 1.615353405929e-31   | 22.5041006014215 | 2.33983807348972 |    |     |
| 35         | 153 cellular protein complex disassembly                                |                      |                  |                  |    |     |
| GO:0022415 |                                                                         | 3.6452905487949e-31  | 15.0813387319973 | 3.97619541900215 |    |     |
| 42         | 260 viral reproductive process                                          |                      |                  |                  |    |     |
| GO:0043241 |                                                                         | 5.40034035051794e-31 | 21.5816504939243 | 2.416303370009   |    | 35  |
| 158        | protein complex disassembly                                             |                      |                  |                  |    |     |
| GO:0034623 |                                                                         | 9.81317478602205e-31 | 19.8712103407756 | 2.66099231887067 |    |     |
| 36         | 174 cellular macromolecular complex disassembly                         |                      |                  |                  |    |     |
| GO:0072594 |                                                                         | 1.29617062208105e-30 | 17.592731582066  | 3.1197840979863  | 38 | 204 |
|            | establishment of protein localization to organelle                      |                      |                  |                  |    |     |
| GO:0032984 |                                                                         | 2.8715111329249e-30  | 19.1696087696088 | 2.73745761538994 |    |     |
| 36         | 179 macromolecular complex disassembly                                  |                      |                  |                  |    |     |
| GO:0019058 |                                                                         | 1.05483846835524e-29 | 15.6674107142857 | 3.53269669919037 |    |     |
| 39         | 231 viral infectious cycle                                              |                      |                  |                  |    |     |
| GO:0016032 |                                                                         | 3.86713719436514e-28 | 9.79943306722203 | 6.89716974603834 |    |     |
| 49         | 451 viral reproduction                                                  |                      |                  |                  |    |     |
| GO:0071845 |                                                                         | 3.32954327223926e-26 | 12.231778425656  | 4.34322884229465 |    | 39  |
| 284        | cellular component disassembly at cellular level                        |                      |                  |                  |    |     |
| GO:0022411 |                                                                         | 5.68518374756703e-26 | 12.0318416523236 | 4.40440107951007 |    |     |
| 39         | 288 cellular component disassembly                                      |                      |                  |                  |    |     |
| GO:0033365 |                                                                         | 1.74772767289841e-22 | 7.99710270896712 | 7.23361705072313 |    |     |
| 44         | 473 protein localization to organelle                                   |                      |                  |                  |    |     |
| GO:0006605 |                                                                         | 1.51247769006523e-21 | 7.7342605385959  | 7.24891011002699 |    | 43  |
| 474        | protein targeting                                                       |                      |                  |                  |    |     |
| GO:0006511 |                                                                         | 8.13314886944853e-07 | 4.01654518107139 | 5.566673586603   |    | 20  |
| 364        | ubiquitin-dependent protein catabolic process                           |                      |                  |                  |    |     |
| GO:0019941 |                                                                         | 1.09436102136724e-06 | 3.93445876032941 | 5.67372500172998 |    |     |
| 20         | 371 modification-dependent protein catabolic process                    |                      |                  |                  |    |     |
| GO:0043632 |                                                                         | 1.23993118404523e-06 | 3.90027264805914 | 5.71960417964155 |    |     |
| 20         | 374 modification-dependent macromolecule catabolic process              |                      |                  |                  |    |     |
| GO:0051603 |                                                                         | 2.26947503386426e-06 | 3.73768016287128 | 5.94900006919936 |    |     |
| 20         | 389 proteolysis involved in cellular protein catabolic process          |                      |                  |                  |    |     |
| GO:0044257 |                                                                         | 3.73596844110694e-06 | 3.60709541298742 | 6.14780984014947 |    |     |
| 20         | 402 cellular protein catabolic process                                  |                      |                  |                  |    |     |
| GO:0022613 |                                                                         | 9.54713578926652e-06 | 4.49357785562195 | 3.44093834336724 |    |     |
| 14         | 225 ribonucleoprotein complex biogenesis                                |                      |                  |                  |    |     |
| GO:0042254 |                                                                         | 1.81476997840804e-05 | 5.34893029675638 | 2.27866583627431 |    |     |
| 11         | 149 ribosome biogenesis                                                 |                      |                  |                  |    |     |
| GO:0071843 |                                                                         | 1.88730436687949e-05 | 4.20976918947933 | 3.6550411736212  |    | 14  |
| 239        | cellular component biogenesis at cellular level                         |                      |                  |                  |    |     |

Stable4\_20PerPair

| GO:ID                                                               | Pvalue | OddsRatio | ExpCount             | Count            | Size              | Term                                                                                                                      |
|---------------------------------------------------------------------|--------|-----------|----------------------|------------------|-------------------|---------------------------------------------------------------------------------------------------------------------------|
| GO:0006958                                                          | 8      | 50        | 1.43760734354932e-16 | 342.690476190476 |                   | complement activation, classical pathway                                                                                  |
| GO:0006956                                                          | 8      | 63        | 1.03041429986511e-15 | 261.454545454545 |                   | complement activation                                                                                                     |
| GO:0002455                                                          | 8      | 65        | 1.34156965685537e-15 | 252.245614035088 |                   | humoral immune response mediated by circulating immunoglobulin                                                            |
| GO:0006959                                                          | 9      | 122       | 1.75770439496887e-15 | 162.955752212389 |                   | humoral immune response                                                                                                   |
| GO:0072376                                                          | 8      | 82        | 9.39406184566582e-15 | 194.067567567568 |                   | protein activation cascade                                                                                                |
| GO:0016064                                                          | 8      | 111       | 1.14715514870305e-13 | 139.145631067961 |                   | immunoglobulin mediated immune response                                                                                   |
| GO:0019724                                                          | 8      | 114       | 1.42774143786272e-13 | 135.179245283019 |                   | B cell mediated immunity                                                                                                  |
| GO:0002449                                                          | 8      | 167       | 3.1980049917134e-12  | 89.7861635220126 |                   | lymphocyte mediated immunity                                                                                              |
| GO:0002460                                                          | 8      | 181       | 6.12848705203208e-12 | 82.4393063583815 |                   | adaptive immune response based on somatic recombination of immune receptors built from immunoglobulin superfamily domains |
| GO:0002250                                                          | 8      | 198       | 1.26327648627516e-11 | 74.9736842105263 |                   | adaptive immune response                                                                                                  |
| GO:0002443                                                          | 8      | 211       | 2.10622277151748e-11 | 70.1083743842365 |                   | leukocyte mediated immunity                                                                                               |
| GO:0002253                                                          | 8      | 299       | 3.41068508676345e-10 | 48.6048109965636 |                   | activation of immune response                                                                                             |
| GO:0050778                                                          | 8      | 364       | 1.61994340149145e-09 | 39.5477528089888 |                   | positive regulation of immune response                                                                                    |
| GO:0002252                                                          | 8      | 386       | 2.57343455361979e-09 | 37.1878306878307 |                   | immune effector process                                                                                                   |
| Tissue: Thyroid=>Adipose_Subcutaneous Type: asymmetric              |        |           |                      |                  |                   |                                                                                                                           |
| SourceGene: RP11-165M1.3(ENSG00000261394.1)                         |        |           |                      |                  |                   |                                                                                                                           |
| TargetGeneSet: RPL22 NMNAT1 ZMYM4 RPS8 GTF2B RPL5 RPS27 GAS5        |        |           |                      |                  |                   |                                                                                                                           |
| ZBTB37 RP11 ZC3H11B RPS7 SNX17 CCT7 H3F3AP4 BRK1 RPL15 RPL14        |        |           |                      |                  |                   |                                                                                                                           |
| LIMD1 PCNP RPL24 C3orf33 RPL7L1P8 KIAA1530 LAMTOR3 EEF1A1P9         |        |           |                      |                  |                   |                                                                                                                           |
| H3F3AP6 RPS3A RWDD4 PDCD6 CTD SMN1 SKP1 CTB RPL15P3 PPIAP29 ABT1    |        |           |                      |                  |                   |                                                                                                                           |
| RPS10 RPL10A YIPF3 FTH1P5 EEF1A1P6 RPS3AP26 TRIM56 CLTA             |        |           |                      |                  |                   |                                                                                                                           |
| ATP6V1G1 RPL7A ADRA2A RPS3AP5 BCCIP RPL27A TSG101 MRE11A COPZ1 LRP1 |        |           |                      |                  |                   |                                                                                                                           |
| RPL6 RPSAP54 COL4A2-AS1 SIVA1 RAB11A MYO9A RPS15A TUFM              |        |           |                      |                  |                   |                                                                                                                           |
| SLX1B-SULT1A4 SULT1A4 HSBP1 TAOK1 RPS7P11 PPM1E SUMO2 RPL17 NFIC    |        |           |                      |                  |                   |                                                                                                                           |
| RPL18A RPSAP58 RPL18 RPL13A RPL41P1 DPM1 RPL12P4 RP1 ZNF70 RP6      |        |           |                      |                  |                   |                                                                                                                           |
| WASF4P RPS23P8 HK2P1 MT                                             |        |           |                      |                  |                   |                                                                                                                           |
| GO:ID                                                               | Pvalue | OddsRatio | ExpCount             | Count            | Size              | Term                                                                                                                      |
| GO:0006414                                                          | 105    |           | 5.5318913889203e-29  | 86.316742081448  | 0.428690056051484 | translational elongation                                                                                                  |
| GO:0006415                                                          | 19     | 91        | 2.36445172426491e-28 | 94.4722222222222 |                   | translational termination                                                                                                 |
| GO:0006614                                                          | 19     | 105       | 4.60603802964364e-27 | 79.0156976744186 |                   | SRP-dependent cotranslational protein targeting to membrane                                                               |
| GO:0006613                                                          | 19     | 106       | 5.59710219405467e-27 | 78.1020114942529 |                   | cotranslational protein targeting to membrane                                                                             |
| GO:0045047                                                          | 19     | 106       | 5.59710219405467e-27 | 78.1020114942529 |                   | protein targeting to ER                                                                                                   |
| GO:0072599                                                          | 19     | 106       | 5.59710219405467e-27 | 78.1020114942529 |                   | establishment of protein localization to endoplasmic reticulum                                                            |



Stable4\_20PerPair

|                                                                |                                                                     |                  |                    |    |     |
|----------------------------------------------------------------|---------------------------------------------------------------------|------------------|--------------------|----|-----|
| GO:0070972                                                     | 5.00424773490483e-26                                                | 68.5775252525252 | 0.481765967753097  |    |     |
| 19 118                                                         | protein localization to endoplasmic reticulum                       |                  |                    |    |     |
| GO:0000184                                                     | 5.9392824035809e-26                                                 | 67.887           | 0.485848730191682  | 19 | 119 |
|                                                                | nuclear-transcribed mRNA catabolic process, nonsense-mediated decay |                  |                    |    |     |
| GO:0019080                                                     | 7.04633966105414e-24                                                | 51.3143939393939 | 0.61649712822642   |    |     |
| 19 151                                                         | viral genome expression                                             |                  |                    |    |     |
| GO:0019083                                                     | 7.04633966105414e-24                                                | 51.3143939393939 | 0.61649712822642   |    |     |
| 19 151                                                         | viral transcription                                                 |                  |                    |    |     |
| GO:0006413                                                     | 8.0315888380199e-24                                                 | 50.925           | 0.620579890665006  | 19 | 152 |
|                                                                | translational initiation                                            |                  |                    |    |     |
| GO:0006612                                                     | 9.14605855784254e-24                                                | 50.5414179104478 | 0.624662653103591  |    |     |
| 19 153                                                         | protein targeting to membrane                                       |                  |                    |    |     |
| GO:0043624                                                     | 9.14605855784254e-24                                                | 50.5414179104478 | 0.624662653103591  |    |     |
| 19 153                                                         | cellular protein complex disassembly                                |                  |                    |    |     |
| GO:0043241                                                     | 1.72786162919261e-23                                                | 48.7062949640288 | 0.645076465296519  |    |     |
| 19 158                                                         | protein complex disassembly                                         |                  |                    |    |     |
| GO:0000956                                                     | 6.50560619729064e-23                                                | 45.0996666666667 | 0.68998685212096   |    |     |
| 19 169                                                         | nuclear-transcribed mRNA catabolic process                          |                  |                    |    |     |
| GO:0034623                                                     | 1.15269674110565e-22                                                | 43.6295161290323 | 0.710400664313888  |    |     |
| 19 174                                                         | cellular macromolecular complex disassembly                         |                  |                    |    |     |
| GO:0006402                                                     | 1.79869541711764e-22                                                | 42.5199685534591 | 0.726731714068231  |    |     |
| 19 178                                                         | mRNA catabolic process                                              |                  |                    |    |     |
| GO:0032984                                                     | 2.0069417338134e-22                                                 | 42.25125         | 0.730814476506816  | 19 |     |
| 179                                                            | macromolecular complex disassembly                                  |                  |                    |    |     |
| GO:0019058                                                     | 8.33552572293967e-22                                                | 34.4659132336857 | 0.943118123313265  |    |     |
| 20 231                                                         | viral infectious cycle                                              |                  |                    |    |     |
| GO:0072594                                                     | 2.55136214309036e-21                                                | 36.4774324324324 | 0.832883537471455  |    |     |
| 19 204                                                         | establishment of protein localization to organelle                  |                  |                    |    |     |
| GO:0006401                                                     | 2.80449918466187e-21                                                | 36.2787634408602 | 0.836966299910041  |    |     |
| 19 205                                                         | RNA catabolic process                                               |                  |                    |    |     |
| GO:0022415                                                     | 9.06468470910005e-21                                                | 30.2393162393162 | 1.06151823403225   |    |     |
| 20 260                                                         | viral reproductive process                                          |                  |                    |    |     |
| GO:0016032                                                     | 1.39265510665852e-18                                                | 19.3527373527374 | 1.84132585980209   |    |     |
| 22 451                                                         | viral reproduction                                                  |                  |                    |    |     |
| GO:0071845                                                     | 1.41977872101893e-18                                                | 25.3219811320755 | 1.1595045325583    | 19 |     |
| 284                                                            | cellular component disassembly at cellular level                    |                  |                    |    |     |
| GO:0022411                                                     | 1.84830042862882e-18                                                | 24.9383828996283 | 1.17583558231264   |    |     |
| 19 288                                                         | cellular component disassembly                                      |                  |                    |    |     |
| GO:0033365                                                     | 1.77300484115557e-14                                                | 14.5827092511013 | 1.93114663345097   |    |     |
| 19 473                                                         | protein localization to organelle                                   |                  |                    |    |     |
| GO:0006605                                                     | 1.84204569789139e-14                                                | 14.5496153846154 | 1.93522939588956   |    |     |
| 19 474                                                         | protein targeting                                                   |                  |                    |    |     |
| Tissue: Adipose_Subcutaneous=>Thyroid Type: cluster            |                                                                     |                  |                    |    |     |
| SourceGene: RP11-416A17.1(ENSG00000244540.1)                   |                                                                     |                  |                    |    |     |
| TargetGeneSet: RP11 FCRL3 FCRL2 IGKJ5 IGKC IGKJ4 IGKJ3 IGKJ2   |                                                                     |                  |                    |    |     |
| IGKJ1 IGKV4-1 IGKV1-5 IGKV1-6 IGKV1-8 IGKV3-15 IGKV3D-15 EOMES |                                                                     |                  |                    |    |     |
| KLHL7 IGJ GALNTL6 BLK POU2AF1 GS1 GJB6 IGHA2 IGHG2 IGHGP       |                                                                     |                  |                    |    |     |
| IGHA1 IGHG1 IGHG3 IGHM IGHJ5 IGHV6-1 IGHV2-5 IGHV1-18 IGHV3-30 |                                                                     |                  |                    |    |     |
| IGHV3-33 IGHV3-48 IGHV5-51 IGHV4-59 TNFRSF17                   |                                                                     |                  |                    |    |     |
| TBC1D27 IGLV4-69 IGLV1-47 IGLV5-45 IGLV1-44 IGLV1-40           |                                                                     |                  |                    |    |     |
| ZNF280A IGLV3-25 IGLV2-11 IGLV3-1 IGLC1 IGLC2 IGLC3            |                                                                     |                  |                    |    |     |
| GOBPID Pvalue OddsRatio ExpCount Count Size Term               |                                                                     |                  |                    |    |     |
| GO:0006958                                                     | 4.17272448412705e-17                                                | 210.526829268293 | 0.0830392360390284 |    |     |
| 9 50                                                           | complement activation, classical pathway                            |                  |                    |    |     |
| GO:0006956                                                     | 3.89403027699151e-16                                                | 159.7            | 0.104629437409176  | 9  | 63  |
|                                                                | complement activation                                               |                  |                    |    |     |
| GO:0002455                                                     | 5.24961254567502e-16                                                | 153.975          | 0.107951006850737  | 9  | 65  |
|                                                                | humoral immune response mediated by circulating immunoglobulin      |                  |                    |    |     |
| GO:0006959                                                     | 2.24370981243159e-15                                                | 91.2946428571429 | 0.202615735935229  |    |     |
| 10 122                                                         | humoral immune response                                             |                  |                    |    |     |
| GO:0072376                                                     | 4.73636565626121e-15                                                | 117.978082191781 | 0.136184347104007  |    |     |
| 9 82                                                           | protein activation cascade                                          |                  |                    |    |     |
| GO:0016064                                                     | 7.94729347232045e-14                                                | 84.2647058823529 | 0.184347104006643  |    |     |

STable4\_20PerPair

|                |          |                                                                                                                           |                      |                  |                   |                                                                     |                   |           |        |      |
|----------------|----------|---------------------------------------------------------------------------------------------------------------------------|----------------------|------------------|-------------------|---------------------------------------------------------------------|-------------------|-----------|--------|------|
| 9              | 111      | immunoglobulin mediated immune response                                                                                   | 1.01656580271012e-13 | 81.84            | 0.189329458168985 | 9                                                                   | 114               |           |        |      |
| GO:0019724     |          | B cell mediated immunity                                                                                                  |                      |                  |                   |                                                                     |                   |           |        |      |
| GO:0002449     |          | lymphocyte mediated immunity                                                                                              | 3.33579003599497e-12 | 54.1860759493671 | 0.277351048370355 |                                                                     |                   |           |        |      |
| 9              | 167      | adaptive immune response based on somatic recombination of immune receptors built from immunoglobulin superfamily domains | 6.91206296908552e-12 | 49.7267441860465 | 0.300602034461283 |                                                                     |                   |           |        |      |
| GO:0002460     |          | adaptive immune response                                                                                                  | 1.55296624225031e-11 | 45.2             | 0.328835374714553 | 9                                                                   | 198               |           |        |      |
| GO:0002250     |          | activation of immune response                                                                                             | 1.87926130523349e-11 | 34.9431537320811 | 0.49657463151339  |                                                                     |                   |           |        |      |
| GO:0002253     |          | leukocyte mediated immunity                                                                                               | 2.75033885290613e-11 | 42.2524752475247 | 0.3504255760847   | 9                                                                   |                   |           |        |      |
| GO:0002443     |          | positive regulation of immune response                                                                                    | 1.3027059467683e-10  | 28.3958837772397 | 0.604525638364127 |                                                                     |                   |           |        |      |
| GO:0050778     |          | immune effector process                                                                                                   | 2.31323124500339e-10 | 26.6926291793313 | 0.6410629022213   | 10                                                                  |                   |           |        |      |
| GO:0002252     |          | Tissue: Thyroid=>Adipose_Subcutaneous                                                                                     |                      |                  |                   |                                                                     |                   |           |        |      |
| 386            |          | SourceGene: RP11-95P2.3(ENSG00000263105.1)                                                                                | Type: asymmetric     |                  |                   |                                                                     |                   |           |        |      |
| TargetGeneSet: | FAM213B  | CEP104                                                                                                                    | DFFA                 | LUZP1            | RPL11             | RP4                                                                 | RP1               | RPS8      | RPL5   |      |
| MTF2           | RWDD3    | RP11                                                                                                                      | HBXIP                | RPRD2            | PI4KB             | KIRREL                                                              | GORAB             | ACBD6     | UBC    |      |
| PRORS1P        |          | CCDC104                                                                                                                   | COMMD1               | TPRKB            | DGUOK             | ZEB2-AS1                                                            |                   | ZNF662    | SETD2  |      |
| IP6K2          | RPL10AP6 |                                                                                                                           | NIT2                 | RPL24            | HEG1              | TRIM42                                                              | RPL22L1           | DNAJC19   | HNRPDL |      |
| RPL34          | SETD7    | FRG1                                                                                                                      | C5orf55              | NDUFAF2          | TAf9              | GRAMD3                                                              | CTB               | NDST1     | EHMT2  |      |
| AGPAT1         | MNF1     | RPL10A                                                                                                                    | LINC00472            |                  | RPL39P3           | COX7A2                                                              | SENP6             | C6orf162  |        |      |
| TRMT11         | MRPS12   | C7orf44                                                                                                                   | BAZ1B                | FIS1             | ST7-AS1           | MRPS33                                                              | SSBP1             | ZNF862    | MLL3   |      |
| KCTD9          | DCTN6    | RPS20                                                                                                                     | CHCHD7               | C8orf59          | RPL30             | NDUFB9                                                              | ZNF572            | RPS6      | RPL12  |      |
| PRRC2B         | ARHGAP12 |                                                                                                                           | RPS24                | SFR1             | CYB5R2            | RPL27A                                                              | FIBIN             | INCENP    | MRPL11 |      |
| CLNS1A         | TMEM126B |                                                                                                                           | TMEM126A             |                  | SDHD              | RPS25                                                               | CBL               | PFDN5     | SSH1   | MMAB |
| RILPL1         | MED4-AS1 |                                                                                                                           | NIN                  | MNAT1            | EXD2              | COX16                                                               | RPL15P2           | PPP1R13B  |        |      |
| ATPBD4         | RN5S395  | RPS27L                                                                                                                    | LRRC49               | C15orf39         |                   | WDR61                                                               | MORF4L1           | C15orf40  |        |      |
| RPS15A         | NFATC3   | APRT                                                                                                                      | RPL26                | C17orf48         |                   | NCOR1                                                               | RPL23A            | RFFL      | RPL17  |      |
| RPL19          | RPL27    | SSTR2                                                                                                                     | CDC42EP4             |                  | TNRC6C            | CTD                                                                 | NDUFV2            | C18orf32  |        |      |
| RPS15          | ZBTB7A   | SLC35E1                                                                                                                   | ZNF224               | SNRPD2           | ARHGAP35          |                                                                     | RPL18             | ZNF264    | SNRPB2 |      |
| SOGA1          | SNHG11   | B4GALT5                                                                                                                   | SPATA2               | DPM1             | TSHZ2             | PFDN4                                                               | ATP50             | KRTAP10-5 |        |      |
| MRPL40         | FAM211B  | EP300                                                                                                                     | FTLP2                | RPS2P55          | CXorf36           | UXT                                                                 | IQSEC2            | COX7B     | MID2   |      |
| RPL39          | CCDC160  | MECP2                                                                                                                     | FUNDC2               | MT               |                   |                                                                     |                   |           |        |      |
| GOBPID         | Pvalue   | OddsRatio                                                                                                                 | ExpCount             | Count            | Size              | Term                                                                |                   |           |        |      |
| GO:0006415     | 23       | 91                                                                                                                        | 3.6001244660263e-29  | 54.2354593522802 |                   | translational termination                                           | 0.705279911424815 |           |        |      |
| GO:0006414     | 23       | 105                                                                                                                       | 1.38215202205398e-27 | 44.9316251027679 |                   | translational elongation                                            | 0.813784513182479 |           |        |      |
| GO:0006614     | 23       | 105                                                                                                                       | 1.38215202205398e-27 | 44.9316251027679 |                   | SRP-dependent cotranslational protein targeting to membrane         | 0.813784513182479 |           |        |      |
| GO:0006613     | 23       | 106                                                                                                                       | 1.75467512630116e-27 | 44.3871666441045 |                   | cotranslational protein targeting to membrane                       | 0.821534841879455 |           |        |      |
| GO:0045047     | 23       | 106                                                                                                                       | 1.75467512630116e-27 | 44.3871666441045 |                   | protein targeting to ER                                             | 0.821534841879455 |           |        |      |
| GO:0072599     | 23       | 106                                                                                                                       | 1.75467512630116e-27 | 44.3871666441045 |                   | establishment of protein localization to endoplasmic reticulum      | 0.821534841879455 |           |        |      |
| GO:0019080     | 25       | 151                                                                                                                       | 1.08115365886981e-26 | 32.4142492245941 |                   | viral genome expression                                             | 1.17029963324337  |           |        |      |
| GO:0019083     | 25       | 151                                                                                                                       | 1.08115365886981e-26 | 32.4142492245941 |                   | viral transcription                                                 | 1.17029963324337  |           |        |      |
| GO:0070972     | 118      |                                                                                                                           | 2.54989901228049e-26 | 38.747723240686  | 0.914538786243167 | protein localization to endoplasmic reticulum                       |                   | 23        |        |      |
| GO:0000184     | 119      |                                                                                                                           | 3.14202731221828e-26 | 38.34140917603   | 0.922289114940143 | nuclear-transcribed mRNA catabolic process, nonsense-mediated decay |                   | 23        |        |      |
| GO:0034623     | 24       | 174                                                                                                                       | 1.18028220087103e-23 | 25.7981818181818 | 1.34855719327382  | cellular macromolecular complex disassembly                         |                   |           |        |      |
| GO:0006413     | 23       | 152                                                                                                                       | 1.21010173272858e-23 | 28.4670324884592 | 1.17804996194035  | translational initiation                                            |                   |           |        |      |

Stable4\_20PerPair

|                                                        |                                                    |                                                             |                     |          |        |                   |          |         |       |      |
|--------------------------------------------------------|----------------------------------------------------|-------------------------------------------------------------|---------------------|----------|--------|-------------------|----------|---------|-------|------|
| GO:0006612                                             | 1.41571643707551e-23                               | 28.2460674157303                                            | 1.18580029063733    |          |        |                   |          |         |       |      |
| 23 153                                                 | protein targeting to membrane                      |                                                             |                     |          |        |                   |          |         |       |      |
| GO:0043624                                             | 1.41571643707551e-23                               | 28.2460674157303                                            | 1.18580029063733    |          |        |                   |          |         |       |      |
| 23 153                                                 | cellular protein complex disassembly               |                                                             |                     |          |        |                   |          |         |       |      |
| GO:0032984                                             | 2.37440225082577e-23                               | 24.9571847507331                                            | 1.3873088367587 24  |          |        |                   |          |         |       |      |
| 179                                                    | macromolecular complex disassembly                 |                                                             |                     |          |        |                   |          |         |       |      |
| GO:0019058                                             | 2.8929724382685e-23                                | 20.8442427680091                                            | 1.79032592900145    |          |        |                   |          |         |       |      |
| 26 231                                                 | viral infectious cycle                             |                                                             |                     |          |        |                   |          |         |       |      |
| GO:0043241                                             | 3.05073149597029e-23                               | 27.1903454015814                                            | 1.22455193412221    |          |        |                   |          |         |       |      |
| 23 158                                                 | protein complex disassembly                        |                                                             |                     |          |        |                   |          |         |       |      |
| GO:0000956                                             | 1.50675129089966e-22                               | 25.1222872094813                                            | 1.30980554978894    |          |        |                   |          |         |       |      |
| 23 169                                                 | nuclear-transcribed mRNA catabolic process         |                                                             |                     |          |        |                   |          |         |       |      |
| GO:0006402                                             | 5.11638036035902e-22                               | 23.6485683218557                                            | 1.37955850806173    |          |        |                   |          |         |       |      |
| 23 178                                                 | mRNA catabolic process                             |                                                             |                     |          |        |                   |          |         |       |      |
| GO:0072594                                             | 5.79866532403971e-22                               | 21.4530303030303                                            | 1.5810670541831 24  |          |        |                   |          |         |       |      |
| 204                                                    | establishment of protein localization to organelle |                                                             |                     |          |        |                   |          |         |       |      |
| GO:0022415                                             | 6.26001439040458e-22                               | 18.2235142118863                                            | 2.01508546121376    |          |        |                   |          |         |       |      |
| 26 260                                                 | viral reproductive process                         |                                                             |                     |          |        |                   |          |         |       |      |
| GO:0006401                                             | 1.37336880572313e-20                               | 20.1019261637239                                            | 1.58881738288008    |          |        |                   |          |         |       |      |
| 23 205                                                 | RNA catabolic process                              |                                                             |                     |          |        |                   |          |         |       |      |
| GO:0071845                                             | 9.85998518569059e-20                               | 15.6215328629122                                            | 2.20109334994118    |          |        |                   |          |         |       |      |
| 25 284                                                 | cellular component disassembly at cellular level   |                                                             |                     |          |        |                   |          |         |       |      |
| GO:0022411                                             | 1.38750251207979e-19                               | 15.3795725711289                                            | 2.23209466472908    |          |        |                   |          |         |       |      |
| 25 288                                                 | cellular component disassembly                     |                                                             |                     |          |        |                   |          |         |       |      |
| GO:0016032                                             | 5.71737765680821e-17                               | 10.424667036626                                             | 3.49539824233617 27 |          |        |                   |          |         |       |      |
| 451                                                    | viral reproduction                                 |                                                             |                     |          |        |                   |          |         |       |      |
| GO:0033365                                             | 1.72757418304349e-14                               | 8.90997023809524                                            | 3.66590547366964    |          |        |                   |          |         |       |      |
| 25 473                                                 | protein localization to organelle                  |                                                             |                     |          |        |                   |          |         |       |      |
| GO:0006605                                             | 1.81291181544045e-14                               | 8.88948621457645                                            | 3.67365580236662    |          |        |                   |          |         |       |      |
| 25 474                                                 | protein targeting                                  |                                                             |                     |          |        |                   |          |         |       |      |
| GO:0022613                                             | 1.69884318108812e-07                               | 7.95830985915493                                            | 1.7438239568196 12  |          |        |                   |          |         |       |      |
| 225                                                    | ribonucleoprotein complex biogenesis               |                                                             |                     |          |        |                   |          |         |       |      |
| GO:0042274                                             | 2.02089222131986e-07                               | 51.4953271028037                                            | 0.139505916545568   |          |        |                   |          |         |       |      |
| 5 18                                                   | ribosomal small subunit biogenesis                 |                                                             |                     |          |        |                   |          |         |       |      |
| GO:0071843                                             | 3.26044016689171e-07                               | 7.46008810572687                                            | 1.85232855857726    |          |        |                   |          |         |       |      |
| 12 239                                                 | cellular component biogenesis at cellular level    |                                                             |                     |          |        |                   |          |         |       |      |
| GO:0006364                                             | 1.40535534033086e-06                               | 11.4126602564103                                            | 0.806034184485503   |          |        |                   |          |         |       |      |
| 8 104                                                  | rRNA processing                                    |                                                             |                     |          |        |                   |          |         |       |      |
| GO:0016072                                             | 2.15109764132722e-06                               | 10.736802413273                                             | 0.852536156667359 8 |          |        |                   |          |         |       |      |
| 110                                                    | rRNA metabolic process                             |                                                             |                     |          |        |                   |          |         |       |      |
| GO:0042254                                             | 2.30284618741013e-06                               | 8.8620665742025                                             | 1.15479897584942 9  |          |        |                   |          |         |       |      |
| 149                                                    | ribosome biogenesis                                |                                                             |                     |          |        |                   |          |         |       |      |
| GO:0018022                                             | 2.31647393217416e-06                               | 58.9711934156379                                            | 0.100754273060688   |          |        |                   |          |         |       |      |
| 4 13                                                   | peptidyl-lysine methylation                        |                                                             |                     |          |        |                   |          |         |       |      |
| GO:0034660                                             | 1.30103427658037e-05                               | 5.59062658090627                                            | 2.20884367863816    |          |        |                   |          |         |       |      |
| 11 285                                                 | ncRNA metabolic process                            |                                                             |                     |          |        |                   |          |         |       |      |
| Tissue: Thyroid=>Adipose_Subcutaneous Type: asymmetric |                                                    |                                                             |                     |          |        |                   |          |         |       |      |
| SourceGene:                                            | SERPINB7(ENSG00000166396.8)                        |                                                             |                     |          |        |                   |          |         |       |      |
| TargetGeneSet:                                         | RP4                                                | RPL11                                                       | SYNC                | RP3      | RPS8   | PTGES3P1          | RP11     |         |       |      |
| RP11-165H20.1                                          | SRGAP2P1                                           |                                                             | ISG20L2             | C1orf9   | UBC    | COX5B             | WDSUB1   | RPL37A  |       |      |
| PCOLCE2                                                | NAALADL2                                           | RPL34                                                       | NDUFC1              | COX7C    | CTD    | HINT1             | PAIP2    | CTB     |       |      |
| RPS14                                                  | GPLD1                                              | PPP1R10                                                     | RPL24P4             | RPL39P3  | FILIP1 | MRPS12            | C7orf44  | RPS20   | EEF1D | RPL8 |
| RPS6                                                   | ANKRD19P                                           | SEC61B                                                      | RPL35               | ITIH5    | RPS24  | NHP2P1            | PIDD     | RPLP2   |       |      |
| STIM1                                                  | RPL27A                                             | C11orf10                                                    | FAU                 | CDC42EP2 |        | TMEM126A          |          | RPS25   |       |      |
| ZDHHC17                                                | ACTR6                                              | EIF4A1P7                                                    | RAD17P2             | RPL7AP6  | SNAP23 | DUT               | RPS3AP6  | RPLP1   |       |      |
| C16orf13                                               |                                                    | RPL13                                                       | RPL7AP64            | RPL19    | RPL27  | BPTF              | C18orf21 |         |       |      |
| DAZAP1                                                 | RPS15                                              | UQCR11                                                      | ZBTB7A              | RPL36    | RPS19  | APOE              | RPL18    | SLC27A5 | STS   |      |
| EEF1B2P3                                               |                                                    | RPL39                                                       |                     |          |        |                   |          |         |       |      |
| GOBPID                                                 | Pvalue                                             | OddsRatio                                                   | ExpCount            | Count    | Size   | Term              |          |         |       |      |
| GO:0006414                                             | 25 105                                             | 3.91760352999628e-39                                        | 131.544117647059    |          |        | 0.428690056051484 |          |         |       |      |
|                                                        |                                                    | translational elongation                                    |                     |          |        |                   |          |         |       |      |
| GO:0006614                                             | 25 105                                             | 3.91760352999628e-39                                        | 131.544117647059    |          |        | 0.428690056051484 |          |         |       |      |
|                                                        |                                                    | SRP-dependent cotranslational protein targeting to membrane |                     |          |        |                   |          |         |       |      |

Stable4\_20PerPair

|            |                                                                         |                  |                    |       |
|------------|-------------------------------------------------------------------------|------------------|--------------------|-------|
| GO:0006613 | 5.11506298933691e-39                                                    | 129.91103848947  | 0.43277281849007   | 25    |
| 106        | cotranslational protein targeting to membrane                           |                  |                    |       |
| GO:0045047 | 5.11506298933691e-39                                                    | 129.91103848947  | 0.43277281849007   | 25    |
| 106        | protein targeting to ER                                                 |                  |                    |       |
| GO:0072599 | 5.11506298933691e-39                                                    | 129.91103848947  | 0.43277281849007   | 25    |
| 106        | establishment of protein localization to endoplasmic reticulum          |                  |                    |       |
| GO:0006415 | 1.01595607281427e-38                                                    | 146.609808102345 | 0.371531381911286  |       |
| 24         | 91 translational termination                                            |                  |                    |       |
| GO:0070972 | 1.01929864570169e-37                                                    | 113.053447185326 | 0.481765967753097  |       |
| 25         | 118 protein localization to endoplasmic reticulum                       |                  |                    |       |
| GO:0000184 | 1.38503807196725e-35                                                    | 103.196390977444 | 0.485848730191682  |       |
| 24         | 119 nuclear-transcribed mRNA catabolic process, nonsense-mediated decay |                  |                    |       |
| GO:0006413 | 1.01370724578367e-34                                                    | 82.5903195924039 | 0.620579890665006  |       |
| 25         | 152 translational initiation                                            |                  |                    |       |
| GO:0006612 | 1.20892872418513e-34                                                    | 81.9393382352941 | 0.624662653103591  |       |
| 25         | 153 protein targeting to membrane                                       |                  |                    |       |
| GO:0019080 | 6.81769414030768e-33                                                    | 77.0213723284589 | 0.61649712822642   |       |
| 24         | 151 viral genome expression                                             |                  |                    |       |
| GO:0019083 | 6.81769414030768e-33                                                    | 77.0213723284589 | 0.61649712822642   |       |
| 24         | 151 viral transcription                                                 |                  |                    |       |
| GO:0043624 | 9.55721164742459e-33                                                    | 75.8166112956811 | 0.624662653103591  |       |
| 24         | 153 cellular protein complex disassembly                                |                  |                    |       |
| GO:0043241 | 2.17778342448324e-32                                                    | 72.9620469083156 | 0.645076465296519  |       |
| 24         | 158 protein complex disassembly                                         |                  |                    |       |
| GO:0000956 | 1.210548569293e-31                                                      | 67.3749753694581 | 0.68998685212096   |       |
| 24         | 169 nuclear-transcribed mRNA catabolic process                          |                  |                    |       |
| GO:0072594 | 2.45626616808616e-31                                                    | 58.3839960565232 | 0.832883537471455  |       |
| 25         | 204 establishment of protein localization to organelle                  |                  |                    |       |
| GO:0034623 | 2.53647848095198e-31                                                    | 65.1062857142857 | 0.710400664313888  |       |
| 24         | 174 cellular macromolecular complex disassembly                         |                  |                    |       |
| GO:0006402 | 4.50871690182668e-31                                                    | 63.3974025974026 | 0.726731714068231  |       |
| 24         | 178 mRNA catabolic process                                              |                  |                    |       |
| GO:0032984 | 5.19459579490162e-31                                                    | 62.9839631336406 | 0.730814476506816  |       |
| 24         | 179 macromolecular complex disassembly                                  |                  |                    |       |
| GO:0006401 | 1.56735702897842e-29                                                    | 53.8380426203631 | 0.836966299910041  |       |
| 24         | 205 RNA catabolic process                                               |                  |                    |       |
| GO:0019058 | 3.04852624346059e-28                                                    | 46.9896480331263 | 0.943118123313265  |       |
| 24         | 231 viral infectious cycle                                              |                  |                    |       |
| GO:0022415 | 5.60861453497785e-27                                                    | 41.1312348668281 | 1.06151823403225   |       |
| 24         | 260 viral reproductive process                                          |                  |                    |       |
| GO:0071845 | 4.85079485677874e-26                                                    | 37.2712087912088 | 1.1595045325583    | 24    |
| 284        | cellular component disassembly at cellular level                        |                  |                    |       |
| GO:0022411 | 6.81833763565149e-26                                                    | 36.6961038961039 | 1.17583558231264   |       |
| 24         | 288 cellular component disassembly                                      |                  |                    |       |
| GO:0033365 | 1.81251467797619e-23                                                    | 24.5793505525049 | 1.93114663345097   |       |
| 26         | 473 protein localization to organelle                                   |                  |                    |       |
| GO:0006605 | 1.91335697240479e-23                                                    | 24.5227272727273 | 1.93522939588956   |       |
| 26         | 474 protein targeting                                                   |                  |                    |       |
| GO:0016032 | 3.14244848263736e-21                                                    | 22.4262295081967 | 1.84132585980209   |       |
| 24         | 451 viral reproduction                                                  |                  |                    |       |
| GO:0042274 | 4.02163361774794e-13                                                    | 175.991258741259 | 0.0734897238945402 |       |
| 7          | 18 ribosomal small subunit biogenesis                                   |                  |                    |       |
| GO:0042254 | 8.37006330389339e-09                                                    | 18.324           | 0.608331603349249  | 9 149 |
|            | ribosome biogenesis                                                     |                  |                    |       |
| GO:0022613 | 2.21126551623303e-08                                                    | 13.4570479354533 | 0.918621548681752  |       |
| 10         | 225 ribonucleoprotein complex biogenesis                                |                  |                    |       |
| GO:0071843 | 3.9182406551914e-08                                                     | 12.6218697085821 | 0.97578022282195   |       |
| 10         | 239 cellular component biogenesis at cellular level                     |                  |                    |       |
| GO:0006364 | 2.04628754142937e-07                                                    | 19.838421887391  | 0.424607293612899  | 7     |
| 104        | rRNA processing                                                         |                  |                    |       |
| GO:0016072 | 3.00773334138548e-07                                                    | 18.6749439880508 | 0.449103868244412  |       |
| 7          | 110 rRNA metabolic process                                              |                  |                    |       |
| GO:0000028 | 1.28170735981912e-06                                                    | 256.946428571429 | 0.0244965746315134 |       |

Stable4\_20PerPair

|                                       |           |                                  |                  |                   |         |                                                                     |         |       |          |                   |
|---------------------------------------|-----------|----------------------------------|------------------|-------------------|---------|---------------------------------------------------------------------|---------|-------|----------|-------------------|
| 3                                     | 6         | ribosomal small subunit assembly |                  |                   |         |                                                                     |         |       |          |                   |
| GO:0030490                            |           | 2.23647028926986e-06             | 192.696428571429 |                   |         |                                                                     |         |       |          | 0.028579337070099 |
| 3                                     | 7         | maturation of SSU-rRNA           |                  |                   |         |                                                                     |         |       |          |                   |
| GO:0034470                            |           | 1.62448585712689e-05             | 9.90364687126345 |                   |         |                                                                     |         |       |          | 0.816552487717113 |
| 7                                     | 200       | ncRNA processing                 |                  |                   |         |                                                                     |         |       |          |                   |
| Tissue: Thyroid=>Adipose_Subcutaneous |           | Type:                            | asymmetric       |                   |         |                                                                     |         |       |          |                   |
| SourceGene:                           |           | STAC2(ENSG00000141750.5)         |                  |                   |         |                                                                     |         |       |          |                   |
| TargetGeneSet:                        |           | RPL11                            | SPATA1           | GTF2B             | RPL5    | RP4                                                                 | RP11    | MRPL9 | UFC1     |                   |
| GORAB                                 | ZBTB37    | RPS7                             | UBC              | RPL37A            | RPL14   | RPL24                                                               | CD80    | AADAC | ANKRD17  |                   |
| RPL34                                 | EEF1A1P19 |                                  | BTF3             | CTB               | RPS14   | GTPBP10                                                             | BPGM    | RPS20 | RPL30    | RPL8              |
| RPS6                                  | RPL35     | GPSM1                            | RPS24            | RPL13AP5          |         | FAU                                                                 | RPS3    | RPL41 | NACA     |                   |
| CSRP2                                 | C12orf51  |                                  | ST13P4           | POU4F1            | RPL7AP6 | GANC                                                                | RPS3AP6 | RPL4  | GOLGA6L9 |                   |
| RPS15A                                | CES4A     | RPL26                            | TOM1L2           | RPS7P1            | RPL23A  | RPL17                                                               | RPL19   | RPL27 | CTD      |                   |
| RPS16                                 | RPS19     | SNRPD2                           | RPS11            | RPS23P8           | RPS4X   |                                                                     |         |       |          |                   |
| GOBPID                                | Pvalue    | OddsRatio                        | ExpCount         | Count             | Size    | Term                                                                |         |       |          |                   |
| GO:0006415                            |           | 1.45136449418672e-52             | 304.840175953079 |                   |         | translational termination                                           |         |       |          | 0.321154245380943 |
| 29                                    | 91        |                                  |                  |                   |         |                                                                     |         |       |          |                   |
| GO:0006414                            |           | 1.89776590058902e-50             | 248.442583732057 |                   |         | translational elongation                                            |         |       |          | 0.370562590824164 |
| 29                                    | 105       |                                  |                  |                   |         |                                                                     |         |       |          |                   |
| GO:0006614                            |           | 1.89776590058902e-50             | 248.442583732057 |                   |         | SRP-dependent cotranslational protein targeting to membrane         |         |       |          | 0.370562590824164 |
| 29                                    | 105       |                                  |                  |                   |         |                                                                     |         |       |          |                   |
| GO:0006613                            |           | 2.60863724274437e-50             | 245.19893742621  | 0.374091758355823 |         | cotranslational protein targeting to membrane                       |         |       |          | 29                |
| 106                                   |           |                                  |                  |                   |         |                                                                     |         |       |          |                   |
| GO:0045047                            |           | 2.60863724274437e-50             | 245.19893742621  | 0.374091758355823 |         | protein targeting to ER                                             |         |       |          | 29                |
| 106                                   |           |                                  |                  |                   |         |                                                                     |         |       |          |                   |
| GO:0072599                            |           | 2.60863724274437e-50             | 245.19893742621  | 0.374091758355823 |         | establishment of protein localization to endoplasmic reticulum      |         |       |          | 29                |
| 106                                   |           |                                  |                  |                   |         |                                                                     |         |       |          |                   |
| GO:0070972                            |           | 9.21040633400354e-49             | 211.960674157303 |                   |         | protein localization to endoplasmic reticulum                       |         |       |          | 0.416441768735728 |
| 29                                    | 118       |                                  |                  |                   |         |                                                                     |         |       |          |                   |
| GO:0000184                            |           | 1.21601407591743e-48             | 209.590909090909 |                   |         | nuclear-transcribed mRNA catabolic process, nonsense-mediated decay |         |       |          | 0.419970936267386 |
| 29                                    | 119       |                                  |                  |                   |         |                                                                     |         |       |          |                   |
| GO:0019080                            |           | 2.69986575030717e-45             | 154.270491803279 |                   |         | viral genome expression                                             |         |       |          | 0.532904297280465 |
| 29                                    | 151       |                                  |                  |                   |         |                                                                     |         |       |          |                   |
| GO:0019083                            |           | 2.69986575030717e-45             | 154.270491803279 |                   |         | viral transcription                                                 |         |       |          | 0.532904297280465 |
| 29                                    | 151       |                                  |                  |                   |         |                                                                     |         |       |          |                   |
| GO:0006413                            |           | 3.33145999118763e-45             | 153.005543237251 |                   |         | translational initiation                                            |         |       |          | 0.536433464812124 |
| 29                                    | 152       |                                  |                  |                   |         |                                                                     |         |       |          |                   |
| GO:0006612                            |           | 4.1044811073224e-45              | 151.760997067449 |                   |         | protein targeting to membrane                                       |         |       |          | 0.539962632343782 |
| 29                                    | 153       |                                  |                  |                   |         |                                                                     |         |       |          |                   |
| GO:0043624                            |           | 4.1044811073224e-45              | 151.760997067449 |                   |         | cellular protein complex disassembly                                |         |       |          | 0.539962632343782 |
| 29                                    | 153       |                                  |                  |                   |         |                                                                     |         |       |          |                   |
| GO:0043241                            |           | 1.13940202102058e-44             | 145.827695560254 |                   |         | protein complex disassembly                                         |         |       |          | 0.557608470002076 |
| 29                                    | 158       |                                  |                  |                   |         |                                                                     |         |       |          |                   |
| GO:0000956                            |           | 9.54110386490306e-44             | 134.266233766234 |                   |         | nuclear-transcribed mRNA catabolic process                          |         |       |          | 0.596429312850322 |
| 29                                    | 169       |                                  |                  |                   |         |                                                                     |         |       |          |                   |
| GO:0034623                            |           | 2.38428944348493e-43             | 129.590909090909 |                   |         | cellular macromolecular complex disassembly                         |         |       |          | 0.614075150508615 |
| 29                                    | 174       |                                  |                  |                   |         |                                                                     |         |       |          |                   |
| GO:0006402                            |           | 4.85955415276291e-43             | 126.076571079927 |                   |         | mRNA catabolic process                                              |         |       |          | 0.62819182063525  |
| 29                                    | 178       |                                  |                  |                   |         |                                                                     |         |       |          |                   |
| GO:0032984                            |           | 5.79043246756825e-43             | 125.227272727273 |                   |         | macromolecular complex disassembly                                  |         |       |          | 0.631720988166909 |
| 29                                    | 179       |                                  |                  |                   |         |                                                                     |         |       |          |                   |
| GO:0072594                            |           | 3.36770442063706e-41             | 107.149350649351 |                   |         | establishment of protein localization to organelle                  |         |       |          | 0.719950176458377 |
| 29                                    | 204       |                                  |                  |                   |         |                                                                     |         |       |          |                   |
| GO:0006401                            |           | 3.91675899148825e-41             | 106.53305785124  | 0.723479343990035 |         | RNA catabolic process                                               |         |       |          | 29                |
| 205                                   |           |                                  |                  |                   |         |                                                                     |         |       |          |                   |
| GO:0019058                            |           | 1.53514968848981e-39             | 92.6512151215122 |                   |         | viral infectious cycle                                              |         |       |          | 0.815237699813162 |
| 29                                    | 231       |                                  |                  |                   |         |                                                                     |         |       |          |                   |
| GO:0022415                            |           | 5.61262883182794e-38             | 80.8541912632822 |                   |         | viral reproductive process                                          |         |       |          | 0.917583558231264 |
| 29                                    | 260       |                                  |                  |                   |         |                                                                     |         |       |          |                   |
| GO:0071845                            |           | 8.07621455431916e-37             | 73.120320855615  | 1.00228357899107  |         | cellular component disassembly at cellular level                    |         |       |          | 29                |
| 284                                   |           |                                  |                  |                   |         |                                                                     |         |       |          |                   |
| GO:0022411                            |           | 1.23024967229617e-36             | 71.9706914706915 |                   |         | cellular component disassembly                                      |         |       |          | 1.01640024911771  |
| 29                                    | 288       |                                  |                  |                   |         |                                                                     |         |       |          |                   |

STable4\_20PerPair

|                                                        |                                                 |                  |                      |
|--------------------------------------------------------|-------------------------------------------------|------------------|----------------------|
| GO:0016032                                             | 1.62286670818752e-32                            | 47.4346793349169 | 1.59165455677808     |
| 30 451                                                 | viral reproduction                              |                  |                      |
| GO:0033365                                             | 2.95274583043609e-30                            | 41.4336609336609 | 1.66929624247457     |
| 29 473                                                 | protein localization to organelle               |                  |                      |
| GO:0006605                                             | 3.14039544754146e-30                            | 41.3375893769152 | 1.67282541000623     |
| 29 474                                                 | protein targeting                               |                  |                      |
| GO:0022613                                             | 6.30863781610371e-13                            | 22.895233366435  | 0.794062694623209 13 |
| 225                                                    | ribonucleoprotein complex biogenesis            |                  |                      |
| GO:0071843                                             | 1.36407422619961e-12                            | 21.4557522123894 | 0.843471040066431    |
| 13 239                                                 | cellular component biogenesis at cellular level |                  |                      |
| GO:0006364                                             | 2.39628482267737e-12                            | 37.1198754540737 | 0.367033423292506    |
| 10 104                                                 | rRNA processing                                 |                  |                      |
| GO:0042254                                             | 3.22551214992942e-12                            | 28.420652173913  | 0.525845962217148 11 |
| 149                                                    | ribosome biogenesis                             |                  |                      |
| GO:0016072                                             | 4.23907571398562e-12                            | 34.8780487804878 | 0.388208428482458    |
| 10 110                                                 | rRNA metabolic process                          |                  |                      |
| GO:0042274                                             | 2.56231928117234e-11                            | 159.866666666667 | 0.0635250155698568   |
| 6 18                                                   | ribosomal small subunit biogenesis              |                  |                      |
| GO:0034470                                             | 1.60597167918263e-09                            | 18.2413350449294 | 0.705833506331742    |
| 10 200                                                 | ncRNA processing                                |                  |                      |
| GO:0034660                                             | 3.42466960135217e-09                            | 14.1775547445255 | 1.00581274652273     |
| 11 285                                                 | ncRNA metabolic process                         |                  |                      |
| GO:0042273                                             | 6.66989270388823e-08                            | 153.106382978723 | 0.0423500103799045   |
| 4 12                                                   | ribosomal large subunit biogenesis              |                  |                      |
| Tissue: Thyroid=>Adipose_Subcutaneous Type: asymmetric |                                                 |                  |                      |

SourceGene: TNFRSF14(ENSG00000157873.11)

|                |          |          |        |          |         |          |           |          |           |      |
|----------------|----------|----------|--------|----------|---------|----------|-----------|----------|-----------|------|
| TargetGeneSet: | CEP104   | UBR4     | RP1    | PPCS     | RP11    | RPS27    | GUK1      | UBC      |           |      |
| TPRKB          | ART4     | EEF1B2   | IL17RC | FLNB-AS1 | THOC7   | TMEM45A  | FAM55C    | RPL22L1  |           |      |
| WHSC1          | BDH2     | RPL34    | RPS3A  | CTD      | TAF9    | NDFIP1   | CTB       | ANKS1A   | TRMT11    |      |
| IGF2R          | TMEM120A |          | FIS1   | C7orf73  | RPS20   | RPL30    | POLR2K    | EEF1D    | GPAA1     | RPL8 |
| RPS6           | NOXA1    | KIAA0913 |        | RPS24    | BTRC    | TRIM44   | C11orf55  |          | FIBP      | MLL  |
| RPS25          | B4GALNT3 |          | ZNF384 | NACA     | POC1B   | RPL18AP3 |           | KIAA0247 |           |      |
| ZC3H14         | RPS3AP6  | LRRC49   | WDR61  | APRT     | TAX1BP3 | RPL26    | C17orf103 |          | HSD17B1P1 |      |
| RPL27          | MAP3K3   | NT5C     | SEMA6B | RPL36    | ERCC1   | C19orf68 |           | B4GALT5  | RPS2P55   | UXT  |
| RPL39          |          |          |        |          |         |          |           |          |           |      |

GOBPID Pvalue OddsRatio ExpCount Count Size Term

GO:0006414 3.09E-22 67.69012419 0.39236039 16 105 translational elongation

STable4\_20PerPair

|                                                                |          |             |             |    |     |
|----------------------------------------------------------------|----------|-------------|-------------|----|-----|
| GO:0070972                                                     | 1.27E-19 | 53.37565347 | 0.440938343 | 15 | 118 |
| protein localization to endoplasmic reticulum                  |          |             |             |    |     |
| GO:0006415                                                     | 1.44E-19 | 65.09090909 | 0.340045672 | 14 | 91  |
| translational termination                                      |          |             |             |    |     |
| GO:0006614                                                     | 1.19E-18 | 55.02307692 | 0.39236039  | 14 | 105 |
| SRP-dependent cotranslational protein targeting to membrane    |          |             |             |    |     |
| GO:0006613                                                     | 1.37E-18 | 54.42119565 | 0.396097156 | 14 | 106 |
| cotranslational protein targeting to membrane                  |          |             |             |    |     |
| GO:0045047                                                     | 1.37E-18 | 54.42119565 | 0.396097156 | 14 | 106 |
| protein targeting to ER                                        |          |             |             |    |     |
| GO:0072599                                                     | 1.37E-18 | 54.42119565 | 0.396097156 | 14 | 106 |
| establishment of protein localization to endoplasmic reticulum |          |             |             |    |     |
| GO:0019080                                                     | 5.81E-18 | 40.33088235 | 0.564251609 | 15 | 151 |
| viral genome expression                                        |          |             |             |    |     |

STable4\_20PerPair

|                                                                       |          |             |             |    |     |
|-----------------------------------------------------------------------|----------|-------------|-------------|----|-----|
| GO:0019083                                                            | 5.81E-18 | 40.33088235 | 0.564251609 | 15 | 151 |
| viral transcription                                                   |          |             |             |    |     |
| GO:0000184                                                            | 7.40E-18 | 47.64       | 0.444675109 | 14 | 119 |
| "nuclear-transcribed mRNA catabolic process, nonsense-mediated decay" |          |             |             |    |     |
| GO:0006413                                                            | 2.50E-16 | 36.16413043 | 0.567988375 | 14 | 152 |
| translational initiation                                              |          |             |             |    |     |
| GO:0006612                                                            | 2.74E-16 | 35.90143885 | 0.57172514  | 14 | 153 |
| protein targeting to membrane                                         |          |             |             |    |     |
| GO:0043624                                                            | 2.74E-16 | 35.90143885 | 0.57172514  | 14 | 153 |
| cellular protein complex disassembly                                  |          |             |             |    |     |
| GO:0043241                                                            | 4.33E-16 | 34.64270833 | 0.590408968 | 14 | 158 |
| protein complex disassembly                                           |          |             |             |    |     |
| GO:0022415                                                            | 8.70E-16 | 24.42277826 | 0.971559062 | 16 | 260 |
| viral reproductive process                                            |          |             |             |    |     |



STable4\_20PerPair

|                                                    |          |             |             |    |     |      |
|----------------------------------------------------|----------|-------------|-------------|----|-----|------|
| GO:0000956                                         | 1.12E-15 | 32.15935484 | 0.63151339  | 14 | 169 |      |
| nuclear-transcribed mRNA catabolic process         |          |             |             |    |     |      |
| GO:0034623                                         | 1.70E-15 | 31.1434375  | 0.650197218 | 14 | 174 |      |
| cellular macromolecular complex disassembly        |          |             |             |    |     |      |
| GO:0006402                                         | 2.33E-15 | 30.37530488 | 0.665144281 | 14 | 178 | mRNA |
| catabolic process                                  |          |             |             |    |     |      |
| GO:0032984                                         | 2.53E-15 | 30.18909091 | 0.668881046 | 14 | 179 |      |
| macromolecular complex disassembly                 |          |             |             |    |     |      |
| GO:0019058                                         | 3.59E-15 | 25.25106838 | 0.863192859 | 15 | 231 |      |
| viral infectious cycle                             |          |             |             |    |     |      |
| GO:0072594                                         | 1.58E-14 | 26.17078947 | 0.762300187 | 14 | 204 |      |
| establishment of protein localization to organelle |          |             |             |    |     |      |
| GO:0006401                                         | 1.69E-14 | 26.03193717 | 0.766036952 | 14 | 205 | RNA  |
| catabolic process                                  |          |             |             |    |     |      |

STable4\_20PerPair

GO:0016032 1.94E-14 16.12471132 1.685281295 18 451  
viral reproduction

GO:0071845 1.50E-12 18.31277778 1.061241437 14 284  
cellular component disassembly at cellular level

GO:0022411 1.81E-12 18.04032847 1.076188499 14 288  
cellular component disassembly

GO:0033365 1.14E-10 11.70557608 1.767490139 15 473  
protein localization to organelle

GO:0006605 1.34E-09 10.60423913 1.771226905 14 474  
protein targeting

Tissue: Artery\_Tibial=>Thyroid Type: asymmetric

SourceGene: AMPD3(ENSG00000133805.10)

|                |          |          |        |           |        |        |         |         |        |     |
|----------------|----------|----------|--------|-----------|--------|--------|---------|---------|--------|-----|
| TargetGeneSet: | RPL22    | ICMT     | RP11   | RP3       | WNT4   | RPL11  | KDM4A   | RPS8    | IPP    |     |
| PGM1           | FPGT     | GNG5     | EVI5   | RPL5      | ABCD3  | PSMA5  | RPS27   | RGS8    | NAV1   |     |
| IPO9-AS1       |          | CICP13   | ACBD3  | B3GALNT2  |        | TRIM58 | RPS7    | DDX1    | CIB4   |     |
| KCNK3          | DHX57    | SRBD1    | UBC    | AAK1      | PAX8   | MAP3K2 | METTL8  | OLA1    | NBEAL1 |     |
| CREB1          | PSMD1    | GRM7     | ATP2B2 | TMPPE     | DCLK3  | RPL14  | CTNNB1  | RPL29   | CRYBG3 |     |
| RPL24          | HGD      | ZNF148   | COPG1  | METTL15P1 |        | PSMD2  | C3orf70 | MB21D2  | MIR943 |     |
| TAPT1          | SCFD2    | THAP6    | SEC31A | AGPAT9    | RPS3A  | TMA16  | STOX2   | SORBS2  | ANKRA2 | CTD |
| PRRC1          | CAMLG    | MTND5P11 |        | PCDHA14   | GNB2L1 | RP1    | MUTED   | PHACTR1 | AGPAT1 |     |
| CCND3          | FAXC     | PDE7B    | IFNGR1 | LATS1     | TIAM2  | TULP4  | FAM120B | ELFN1   | FBXL18 |     |
| TMEM60         | RPS3AP26 |          | CAV1   | CEP41     | RPS20  | YTHDF3 | FAM82B  | EIF3E   | FER1L6 |     |

Stable4\_20PerPair

| AK3P2      | PUF60     | RPS6      | VCP                  | TSTD2            | TGFBR1           | CTNNAL1                                                             | RPL7A    | SEC16A  | CCNY    |      |  |
|------------|-----------|-----------|----------------------|------------------|------------------|---------------------------------------------------------------------|----------|---------|---------|------|--|
| HKDC1      | HK1       | TSPAN15   | C10orf35             |                  | VDAC2            | RPS3AP5                                                             | ALDH18A1 |         | ENTPD7  | GBF1 |  |
| MXI1       | SEC23IP   | RPL27A    | ST5                  | PLEKHA7          | MUC15            | METTL15                                                             | AMBRA1   | ARHGAP1 | CYBASC3 |      |  |
| FADS2      | U6        | SNHG1     | DRAP1                | TSGA10IP         |                  | NDUFV1                                                              | CCND1    | CAPN5   | PAK1    |      |  |
| ARHGAP20   |           | RPS12P21  |                      | RPS25            | PKNOX2           | NRIP2                                                               | COPS7A   | CYP27B1 | CCDC65  |      |  |
| PFDN5      | CBX5      | CAND1     | NAP1L1               | LTA4H            | SLC9A7P1         |                                                                     | SYCP3    | KCTD10  | RPL6    |      |  |
| NOC4L      | ANKRD26P4 |           | N4BP2L1              | TPT1             | LMO7             | GRK1                                                                | SALL2    | CPNE6   | TSSK6   |      |  |
| LINC00517  |           | MGAT2     | GNPNAT1              | VTI1B            | FAM181A-AS1      | FAM181A                                                             | WDR25    | SEC11A  | DET1    |      |  |
| GLYR1      | BFAR      | RPS15A    | 7SK                  | CHMP1A           | POLR2A           | RPL26                                                               | ZNF29P   | TOM1L2  | RPS7P1  |      |  |
| RPL23A     | RASL10B   | ZNHIT3    | RPL17                | RPL19            | CNP              | UBTF                                                                | RPS7P11  | CD300C  | TNRC6C  |      |  |
| BAHCC1     | MAPRE2    | MYO5B     | ADNP2                | ZNF562           | ZNF846           | NOTCH3                                                              | SLC35E1  | ARMC6   | RPSAP58 | OPA3 |  |
| RSPH6A     | FPR3      | ZNF578    | AP5S1                | RRBP1            | PYGB             | COX4I2                                                              | FOXS1    | PPIAP3  | ZNFX1   |      |  |
| SNAI1      | ADNP      | PMEPAL    | GNAS                 | SLC04A1          | SOX18            | WRB                                                                 | ZNF70    | TTC28   | SH3BP1  |      |  |
| SLC35A2    | IGBP1     | CXCR3     | NHSL2                | RPS4X            | FGF16            | LPAR4                                                               | FRMPD3   | XIAP    |         |      |  |
| GOBPID     | Pvalue    | OddsRatio | ExpCount             | Count            | Size             | Term                                                                |          |         |         |      |  |
| GO:0006415 | 23        | 91        | 5.49707574372244e-25 | 33.6272110242698 |                  | translational termination                                           |          |         |         |      |  |
| GO:0006614 | 24        | 105       | 6.885869606049e-25   | 29.6379760041732 |                  | SRP-dependent cotranslational protein targeting to membrane         |          |         |         |      |  |
| GO:0006613 | 24        | 106       | 8.81679103035034e-25 | 29.2744761250429 |                  | cotranslational protein targeting to membrane                       |          |         |         |      |  |
| GO:0045047 | 24        | 106       | 8.81679103035034e-25 | 29.2744761250429 |                  | protein targeting to ER                                             |          |         |         |      |  |
| GO:0072599 | 24        | 106       | 8.81679103035034e-25 | 29.2744761250429 |                  | establishment of protein localization to endoplasmic reticulum      |          |         |         |      |  |
| GO:0070972 | 24        | 118       | 1.4048713517324e-23  | 25.5157326940366 |                  | protein localization to endoplasmic reticulum                       |          |         |         |      |  |
| GO:0000184 | 24        | 119       | 1.74307841946451e-23 | 25.2453669384729 |                  | nuclear-transcribed mRNA catabolic process, nonsense-mediated decay |          |         |         |      |  |
| GO:0006414 | 23        | 105       | 2.0059914759924e-23  | 27.8585195292512 |                  | translational elongation                                            |          |         |         |      |  |
| GO:0006413 | 152       |           | 4.10438586134194e-22 | 19.7660132908918 |                  | translational initiation                                            |          |         |         |      |  |
| GO:0006612 | 25        | 153       | 4.85961034177315e-22 | 19.6102061170213 |                  | protein targeting to membrane                                       |          |         |         |      |  |
| GO:0019080 | 24        | 151       | 6.81456303131408e-21 | 18.8417433736276 |                  | viral genome expression                                             |          |         |         |      |  |
| GO:0019083 | 24        | 151       | 6.81456303131408e-21 | 18.8417433736276 |                  | viral transcription                                                 |          |         |         |      |  |
| GO:0000956 | 24        | 169       | 1.06276498205865e-19 | 16.4817872753764 |                  | nuclear-transcribed mRNA catabolic process                          |          |         |         |      |  |
| GO:0043624 | 23        | 153       | 1.726210050884e-19   | 17.5129101667563 |                  | cellular protein complex disassembly                                |          |         |         |      |  |
| GO:0043241 | 158       |           | 3.65285913707503e-19 | 16.8583268583269 |                  | protein complex disassembly                                         |          |         |         |      |  |
| GO:0006402 | 178       |           | 3.709521462815e-19   | 15.508688494604  | 2.04470278873434 | mRNA catabolic process                                              |          |         |         |      |  |
| GO:0034623 | 23        | 174       | 3.38665676251778e-18 | 15.0549715185477 |                  | cellular macromolecular complex disassembly                         |          |         |         |      |  |
| GO:0032984 | 23        | 179       | 6.47404941193852e-18 | 14.5672852788237 |                  | macromolecular complex disassembly                                  |          |         |         |      |  |
| GO:0072594 | 24        | 204       | 9.45973896564975e-18 | 13.2441314553991 |                  | establishment of protein localization to organelle                  |          |         |         |      |  |
| GO:0006401 | 24        | 205       | 1.06119106486774e-17 | 13.1700256789355 |                  | RNA catabolic process                                               |          |         |         |      |  |
| GO:0019058 | 24        | 231       | 1.71046442166792e-16 | 11.4945907328026 |                  | viral infectious cycle                                              |          |         |         |      |  |
| GO:0022415 | 24        | 260       | 2.55124071533549e-15 | 10.0613511577942 |                  | viral reproductive process                                          |          |         |         |      |  |
| GO:0071845 | 24        | 284       | 1.85440489406182e-14 | 9.11700975081257 |                  | cellular component disassembly at cellular level                    |          |         |         |      |  |
| GO:0022411 | 24        | 288       | 2.53208610317863e-14 | 8.97631241997439 |                  | cellular component disassembly                                      |          |         |         |      |  |

Stable4\_20PerPair

|                                              |                                      |                                                                     |                   |           |             |                  |          |         |         |      |
|----------------------------------------------|--------------------------------------|---------------------------------------------------------------------|-------------------|-----------|-------------|------------------|----------|---------|---------|------|
| GO:0016032                                   | 1.60963128202544e-12                 | 6.3500576896973                                                     | 5.18067953774825  | 27        |             |                  |          |         |         |      |
| 451                                          | viral reproduction                   |                                                                     |                   |           |             |                  |          |         |         |      |
| GO:0006605                                   | 5.14730290142517e-12                 | 6.01332625175028                                                    | 5.44488270707909  |           |             |                  |          |         |         |      |
| 27                                           | 474                                  | protein targeting                                                   |                   |           |             |                  |          |         |         |      |
| GO:0033365                                   | 2.95186882341796e-11                 | 5.7492489613295                                                     | 5.43339561276036  | 26        |             |                  |          |         |         |      |
| 473                                          | protein localization to organelle    |                                                                     |                   |           |             |                  |          |         |         |      |
| GO:0042273                                   | 7.73650233766217e-06                 | 44.0648148148148                                                    | 0.137845131824787 |           |             |                  |          |         |         |      |
| 4                                            | 12                                   | ribosomal large subunit biogenesis                                  |                   |           |             |                  |          |         |         |      |
| GO:0042254                                   | 8.44832163588241e-06                 | 6.52370411363217                                                    | 1.71157705349111  |           |             |                  |          |         |         |      |
| 10                                           | 149                                  | ribosome biogenesis                                                 |                   |           |             |                  |          |         |         |      |
| GO:0022613                                   | 1.11906352074409e-05                 | 5.1479787817816                                                     | 2.58459622171476  | 12        |             |                  |          |         |         |      |
| 225                                          | ribonucleoprotein complex biogenesis |                                                                     |                   |           |             |                  |          |         |         |      |
| Tissue: Artery_Tibial=>Thyroid Type: cluster |                                      |                                                                     |                   |           |             |                  |          |         |         |      |
| SourceGene: AMPD3(ENSG00000133805.10)        |                                      |                                                                     |                   |           |             |                  |          |         |         |      |
| TargetGeneSet:                               | RPL22                                | ICMT                                                                | RP11              | RP3       | WNT4        | RPL11            | KDM4A    | RPS8    | IPP     |      |
| PGM1                                         | FPGT                                 | GNG5                                                                | EVI5              | RPL5      | ABCD3       | PSMA5            | RPS27    | RGS8    | NAV1    |      |
| IPO9-AS1                                     |                                      | CICP13                                                              | ACBD3             | B3GALNT2  |             | TRIM58           | RPS7     | DDX1    | CIB4    |      |
| KCNK3                                        | DHX57                                | SRBD1                                                               | UBC               | AAK1      | PAX8        | MAP3K2           | METTL8   | OLA1    | NBEAL1  |      |
| CREB1                                        | PSMD1                                | GRM7                                                                | ATP2B2            | TMPEE     | DCLK3       | RPL14            | CTNNB1   | RPL29   | CRYBG3  |      |
| RPL24                                        | HGD                                  | ZNF148                                                              | COPG1             | METTL15P1 |             | PSMD2            | C3orf70  | MB21D2  | MIR943  |      |
| TAPT1                                        | SCFD2                                | THAP6                                                               | SEC31A            | AGPAT9    | RPS3A       | TMA16            | STOX2    | SORBS2  | ANKRA2  | CTD  |
| PRRC1                                        | CAMLG                                | MTND5P11                                                            |                   | PCDHA14   | GNB2L1      | RP1              | MUTED    | PHACTR1 | AGPAT1  |      |
| CCND3                                        | FAXC                                 | PDE7B                                                               | IFNGR1            | LATS1     | TIAM2       | TULP4            | FAM120B  | ELFN1   | FBXL18  |      |
| TMEM60                                       | RPS3AP26                             |                                                                     | CAV1              | CEP41     | RPS20       | YTHDF3           | FAM82B   | EIF3E   | FER1L6  |      |
| AK3P2                                        | PUF60                                | RPS6                                                                | VCP               | TSTD2     | TGFBR1      | CTNNAL1          | RPL7A    | SEC16A  | CCNY    |      |
| HKDC1                                        | HK1                                  | TSPAN15                                                             | C10orf35          |           | VDAC2       | RPS3AP5          | ALDH18A1 |         | ENTPD7  | GBF1 |
| MXI1                                         | SEC23IP                              | RPL27A                                                              | ST5               | PLEKHA7   | MUC15       | METTL15          | AMBRA1   | ARHGAP1 | CYBASC3 |      |
| FADS2                                        | U6                                   | SNHG1                                                               | DRAP1             | TSGA10IP  |             | NDUFV1           | CCND1    | CAPN5   | PAK1    |      |
| ARHGAP20                                     |                                      | RPS12P21                                                            |                   | RPS25     | PKNOX2      | NRIP2            | COPS7A   | CYP27B1 | CCDC65  |      |
| PFDN5                                        | CBX5                                 | CAND1                                                               | NAP1L1            | LTA4H     | SLC9A7P1    |                  | SYCP3    | KCTD10  | RPL6    |      |
| NOC4L                                        | ANKRD26P4                            |                                                                     | N4BP2L1           | TPT1      | LMO7        | GRK1             | SALL2    | CPNE6   | TSSK6   |      |
| LINC00517                                    |                                      | MGAT2                                                               | GNPNAT1           | VTI1B     | FAM181A-AS1 |                  | FAM181A  | WDR25   | SEC11A  | DET1 |
| GLYR1                                        | BFAR                                 | RPS15A                                                              | 7SK               | CHMP1A    | POLR2A      | RPL26            | ZNF29P   | TOM1L2  | RPS7P1  |      |
| RPL23A                                       | RASL10B                              | ZNHIT3                                                              | RPL17             | RPL19     | CNP         | UBTF             | RPS7P11  | CD300C  | TNRC6C  |      |
| BAHCC1                                       | MAPRE2                               | MYO5B                                                               | ADNP2             | ZNF562    | ZNF846      | NOTCH3           | SLC35E1  | ARMC6   | RPSAP58 | OPA3 |
| RSPH6A                                       | FPR3                                 | ZNF578                                                              | AP5S1             | RRBP1     | PYGB        | COX4I2           | FOXSI    | PPIAP3  | ZNFX1   |      |
| SNAI1                                        | ADNP                                 | PMEPAL                                                              | GNAS              | SLC04A1   | SOX18       | WRB              | ZNF70    | TTC28   | SH3BP1  |      |
| SLC35A2                                      | IGBP1                                | CXCR3                                                               | NHSL2             | RPS4X     | FGF16       | LPAR4            | FRMPD3   | XIAP    |         |      |
| GOBPID                                       | Pvalue                               | OddsRatio                                                           | ExpCount          | Count     | Size        | Term             |          |         |         |      |
| GO:0006415                                   | 5.49707574372244e-25                 | 33.6272110242698                                                    |                   |           |             | 1.04532558300464 |          |         |         |      |
| 23                                           | 91                                   | translational termination                                           |                   |           |             |                  |          |         |         |      |
| GO:0006614                                   | 6.885869606049e-25                   | 29.6379760041732                                                    |                   |           |             | 1.20614490346689 |          |         |         |      |
| 24                                           | 105                                  | SRP-dependent cotranslational protein targeting to membrane         |                   |           |             |                  |          |         |         |      |
| GO:0006613                                   | 8.81679103035034e-25                 | 29.2744761250429                                                    |                   |           |             | 1.21763199778562 |          |         |         |      |
| 24                                           | 106                                  | cotranslational protein targeting to membrane                       |                   |           |             |                  |          |         |         |      |
| GO:0045047                                   | 8.81679103035034e-25                 | 29.2744761250429                                                    |                   |           |             | 1.21763199778562 |          |         |         |      |
| 24                                           | 106                                  | protein targeting to ER                                             |                   |           |             |                  |          |         |         |      |
| GO:0072599                                   | 8.81679103035034e-25                 | 29.2744761250429                                                    |                   |           |             | 1.21763199778562 |          |         |         |      |
| 24                                           | 106                                  | establishment of protein localization to endoplasmic reticulum      |                   |           |             |                  |          |         |         |      |
| GO:0070972                                   | 1.4048713517324e-23                  | 25.5157326940366                                                    |                   |           |             | 1.35547712961041 |          |         |         |      |
| 24                                           | 118                                  | protein localization to endoplasmic reticulum                       |                   |           |             |                  |          |         |         |      |
| GO:0000184                                   | 1.74307841946451e-23                 | 25.2453669384729                                                    |                   |           |             | 1.36696422392914 |          |         |         |      |
| 24                                           | 119                                  | nuclear-transcribed mRNA catabolic process, nonsense-mediated decay |                   |           |             |                  |          |         |         |      |
| GO:0006414                                   | 2.0059914759924e-23                  | 27.8585195292512                                                    |                   |           |             | 1.20614490346689 |          |         |         |      |
| 23                                           | 105                                  | translational elongation                                            |                   |           |             |                  |          |         |         |      |
| GO:0006413                                   | 4.10438586134194e-22                 | 19.7660132908918                                                    |                   |           |             | 1.7460383364473  | 25       |         |         |      |
| 152                                          | translational initiation             |                                                                     |                   |           |             |                  |          |         |         |      |
| GO:0006612                                   | 4.85961034177315e-22                 | 19.6102061170213                                                    |                   |           |             | 1.75752543076604 |          |         |         |      |
| 25                                           | 153                                  | protein targeting to membrane                                       |                   |           |             |                  |          |         |         |      |
| GO:0019080                                   | 6.81456303131408e-21                 | 18.8417433736276                                                    |                   |           |             | 1.73455124212857 |          |         |         |      |
| 24                                           | 151                                  | viral genome expression                                             |                   |           |             |                  |          |         |         |      |
| GO:0019083                                   | 6.81456303131408e-21                 | 18.8417433736276                                                    |                   |           |             | 1.73455124212857 |          |         |         |      |
| 24                                           | 151                                  | viral transcription                                                 |                   |           |             |                  |          |         |         |      |

Stable4\_20PerPair

|                                                 |                      |                                                    |                          |
|-------------------------------------------------|----------------------|----------------------------------------------------|--------------------------|
| GO:0000956                                      | 1.06276498205865e-19 | 16.4817872753764                                   | 1.94131893986575         |
| 24                                              | 169                  | nuclear-transcribed mRNA catabolic process         |                          |
| GO:0043624                                      | 1.726210050884e-19   | 17.5129101667563                                   | 1.75752543076604         |
| 23                                              | 153                  | cellular protein complex disassembly               |                          |
| GO:0043241                                      | 3.65285913707503e-19 | 16.8583268583269                                   | 1.8149609023597          |
| 158                                             | 205                  | protein complex disassembly                        | 23                       |
| GO:0006402                                      | 3.709521462815e-19   | 15.508688494604                                    | 2.04470278873434         |
| 178                                             | 205                  | mRNA catabolic process                             | 24                       |
| GO:0034623                                      | 3.38665676251778e-18 | 15.0549715185477                                   | 1.99875441145941         |
| 23                                              | 174                  | cellular macromolecular complex disassembly        |                          |
| GO:0032984                                      | 6.47404941193852e-18 | 14.5672852788237                                   | 2.05618988305308         |
| 23                                              | 179                  | macromolecular complex disassembly                 |                          |
| GO:0072594                                      | 9.45973896564975e-18 | 13.2441314553991                                   | 2.34336724102138         |
| 24                                              | 204                  | establishment of protein localization to organelle |                          |
| GO:0006401                                      | 1.06119106486774e-17 | 13.1700256789355                                   | 2.35485433534011         |
| 24                                              | 205                  | RNA catabolic process                              |                          |
| GO:0019058                                      | 1.71046442166792e-16 | 11.4945907328026                                   | 2.65351878762715         |
| 24                                              | 231                  | viral infectious cycle                             |                          |
| GO:0022415                                      | 2.55124071533549e-15 | 10.0613511577942                                   | 2.98664452287039         |
| 24                                              | 260                  | viral reproductive process                         |                          |
| GO:0071845                                      | 1.85440489406182e-14 | 9.11700975081257                                   | 3.26233478651996         |
| 24                                              | 284                  | cellular component disassembly at cellular level   |                          |
| GO:0022411                                      | 2.53208610317863e-14 | 8.97631241997439                                   | 3.30828316379489         |
| 24                                              | 288                  | cellular component disassembly                     |                          |
| GO:0016032                                      | 1.60963128202544e-12 | 6.3500576896973                                    | 5.18067953774825         |
| 451                                             | 278                  | viral reproduction                                 | 27                       |
| GO:0006605                                      | 5.14730290142517e-12 | 6.01332625175028                                   | 5.44488270707909         |
| 27                                              | 474                  | protein targeting                                  |                          |
| GO:0033365                                      | 2.95186882341796e-11 | 5.7492489613295                                    | 5.43339561276036         |
| 473                                             | 473                  | protein localization to organelle                  | 26                       |
| GO:0042273                                      | 7.73650233766217e-06 | 44.0648148148148                                   | 0.137845131824787        |
| 4                                               | 12                   | ribosomal large subunit biogenesis                 |                          |
| GO:0042254                                      | 8.44832163588241e-06 | 6.52370411363217                                   | 1.71157705349111         |
| 10                                              | 149                  | ribosome biogenesis                                |                          |
| GO:0022613                                      | 1.11906352074409e-05 | 5.1479787817816                                    | 2.58459622171476         |
| 225                                             | 225                  | ribonucleoprotein complex biogenesis               | 12                       |
| Tissue: Artery_Tibial=>Thyroid Type: asymmetric |                      |                                                    |                          |
| SourceGene: C19orf66(ENSG00000130813.12)        |                      |                                                    |                          |
| TargetGeneSet:                                  | RPL22                | PNRC2                                              | TMEM57                   |
| CMPK1                                           | ST6GALNAC3           | NEDD4                                              | GNG5                     |
| IVNS1ABP                                        | SERTAD4              | GGPS1                                              | SH3YL1                   |
| HSPD1                                           | CASP10               | MFF                                                | UBE2F                    |
| RPL24                                           | SEMA5B               | CNBP                                               | PIK3CB                   |
| H2AFZ                                           | ANK2                 | RPS3A                                              | SORBS2                   |
| HINT1                                           | PAIP2                | CTB                                                | BOD1                     |
| RPS10                                           | C6orf106             | RPL10A                                             | BRPF3                    |
| HOXA-AS3                                        | FKBP9                | C7orf23                                            | CDK14                    |
| GS1                                             | EIF3E                | EIF3H                                              | EEF1D                    |
| GARNL3                                          | RPL12                | SET                                                | NKX2-1                   |
| VDAC2                                           | RPS3AP5              | MINPP1                                             | MRPL43                   |
| C11orf58                                        |                      | SERGEF                                             | SNHG1                    |
| SCN4B                                           | RPS25                | FAM118B                                            | SLC6A12                  |
| RPL14P1                                         | NAP1L1               | CHPT1                                              | RPLP0                    |
| PIBF1                                           | FAM155A              | LRRCL16B                                           | BAZ1A                    |
| SNX29                                           | BFAR                 | NPIP                                               | RPS15A                   |
| ZNF18                                           | C17orf108            | RPL23A                                             | RPL19                    |
| ADNP2                                           | RPS15                | OAZ1                                               | CAMSAP3                  |
| BFSP1                                           | AHCY                 | C22orf39                                           | SEPT5                    |
| EIF4BP7                                         | FAM3A                |                                                    |                          |
| GOBPID                                          | Pvalue               | OddsRatio                                          | ExpCount                 |
| GO:0006414                                      | 33                   | 105                                                | translational elongation |
| GO:0006415                                      |                      |                                                    |                          |

STable4\_20PerPair

|                                                              |     |                                                                     |                  |                  |                    |
|--------------------------------------------------------------|-----|---------------------------------------------------------------------|------------------|------------------|--------------------|
| 31                                                           | 91  | translational termination                                           |                  |                  |                    |
| GO:0006413                                                   |     | 4.94510631537467e-39                                                | 37.2966101694915 |                  | 1.61981869766798   |
| 36                                                           | 152 | translational initiation                                            |                  |                  |                    |
| GO:0000184                                                   |     | 2.7413336646545e-38                                                 | 45.0665961945032 |                  | 1.2681475330427 33 |
| 119                                                          |     | nuclear-transcribed mRNA catabolic process, nonsense-mediated decay |                  |                  |                    |
| GO:0006614                                                   |     | 6.23447663693387e-37                                                | 48.4413315754779 |                  | 1.11895370562591   |
| 31                                                           | 105 | SRP-dependent cotranslational protein targeting to membrane         |                  |                  |                    |
| GO:0006613                                                   |     | 8.73826405145199e-37                                                | 47.7920867208672 |                  | 1.12961040758425   |
| 31                                                           | 106 | cotranslational protein targeting to membrane                       |                  |                  |                    |
| GO:0045047                                                   |     | 8.73826405145199e-37                                                | 47.7920867208672 |                  | 1.12961040758425   |
| 31                                                           | 106 | protein targeting to ER                                             |                  |                  |                    |
| GO:0072599                                                   |     | 8.73826405145199e-37                                                | 47.7920867208672 |                  | 1.12961040758425   |
| 31                                                           | 106 | establishment of protein localization to endoplasmic reticulum      |                  |                  |                    |
| GO:0070972                                                   |     | 8.93874122208456e-37                                                | 43.3427373236752 |                  | 1.25749083108435   |
| 32                                                           | 118 | protein localization to endoplasmic reticulum                       |                  |                  |                    |
| GO:0000956                                                   |     | 9.20926500736885e-33                                                | 28.3977272727273 |                  | 1.8009826309598 33 |
| 169                                                          |     | nuclear-transcribed mRNA catabolic process                          |                  |                  |                    |
| GO:0006402                                                   |     | 5.67781830737457e-32                                                | 26.6181818181818 |                  | 1.89689294858487   |
| 33                                                           | 178 | mRNA catabolic process                                              |                  |                  |                    |
| GO:0019080                                                   |     | 1.67542810010713e-31                                                | 29.7755420054201 |                  | 1.60916199570964   |
| 31                                                           | 151 | viral genome expression                                             |                  |                  |                    |
| GO:0019083                                                   |     | 1.67542810010713e-31                                                | 29.7755420054201 |                  | 1.60916199570964   |
| 31                                                           | 151 | viral transcription                                                 |                  |                  |                    |
| GO:0006612                                                   |     | 2.59571371316958e-31                                                | 29.2832866853259 |                  | 1.63047539962632   |
| 31                                                           | 153 | protein targeting to membrane                                       |                  |                  |                    |
| GO:0043624                                                   |     | 2.59571371316958e-31                                                | 29.2832866853259 |                  | 1.63047539962632   |
| 31                                                           | 153 | cellular protein complex disassembly                                |                  |                  |                    |
| GO:0034623                                                   |     | 6.9257309933436e-31                                                 | 26.1463865158162 |                  | 1.85426614075151   |
| 32                                                           | 174 | cellular macromolecular complex disassembly                         |                  |                  |                    |
| GO:0043241                                                   |     | 7.53752324109567e-31                                                | 28.1204788425837 |                  | 1.68375890941803   |
| 31                                                           | 158 | protein complex disassembly                                         |                  |                  |                    |
| GO:0032984                                                   |     | 1.80086583217337e-30                                                | 25.2481320397011 |                  | 1.90754965054322   |
| 32                                                           | 179 | macromolecular complex disassembly                                  |                  |                  |                    |
| GO:0072594                                                   |     | 6.31783128145094e-30                                                | 22.5295055821372 |                  | 2.17396719950176   |
| 33                                                           | 204 | establishment of protein localization to organelle                  |                  |                  |                    |
| GO:0006401                                                   |     | 7.46800371641796e-30                                                | 22.3969344608879 |                  | 2.18462390146011   |
| 33                                                           | 205 | RNA catabolic process                                               |                  |                  |                    |
| GO:0019058                                                   |     | 8.21654898857364e-27                                                | 18.5820907817777 |                  | 2.461698152377 32  |
| 231                                                          |     | viral infectious cycle                                              |                  |                  |                    |
| GO:0022415                                                   |     | 2.20499404397268e-26                                                | 16.9042851421706 |                  | 2.77074250916892   |
| 33                                                           | 260 | viral reproductive process                                          |                  |                  |                    |
| GO:0071845                                                   |     | 6.06660650136629e-24                                                | 14.6187874056727 |                  | 3.02650335616912   |
| 32                                                           | 284 | cellular component disassembly at cellular level                    |                  |                  |                    |
| GO:0022411                                                   |     | 9.42250704533257e-24                                                | 14.3862704918033 |                  | 3.06913016400249   |
| 32                                                           | 288 | cellular component disassembly                                      |                  |                  |                    |
| GO:0016032                                                   |     | 9.6487085624725e-21                                                 | 9.81405542986425 |                  | 4.80617258321223   |
| 35                                                           | 451 | viral reproduction                                                  |                  |                  |                    |
| GO:0033365                                                   |     | 4.5441610743182e-20                                                 | 9.30633897394574 |                  | 5.04062002629576   |
| 35                                                           | 473 | protein localization to organelle                                   |                  |                  |                    |
| GO:0006605                                                   |     | 4.49057635309671e-19                                                | 8.92306818181818 |                  | 5.0512767282541 34 |
| 474                                                          |     | protein targeting                                                   |                  |                  |                    |
| GO:0042254                                                   |     | 5.49616685618282e-07                                                | 7.89241917502787 |                  | 1.58784859179296   |
| 11                                                           | 149 | ribosome biogenesis                                                 |                  |                  |                    |
| GO:0022613                                                   |     | 5.18549968006423e-06                                                | 5.5877802023408  | 2.39775794062695 | 12                 |
| 225                                                          |     | ribonucleoprotein complex biogenesis                                |                  |                  |                    |
| GO:0071843                                                   |     | 9.58602691291293e-06                                                | 5.2379475088416  | 2.54695176804373 | 12                 |
| 239                                                          |     | cellular component biogenesis at cellular level                     |                  |                  |                    |
| GO:0006364                                                   |     | 1.50371048294149e-05                                                | 8.10559360730594 |                  | 1.10829700366757   |
| 8                                                            | 104 | rRNA processing                                                     |                  |                  |                    |
| Tissue: Artery_Tibial=>Thyroid Type: asymmetric              |     |                                                                     |                  |                  |                    |
| SourceGene: C3orf37(ENSG00000183624.8)                       |     |                                                                     |                  |                  |                    |
| TargetGeneSet: ATAD3C RPL22 RP11 Clorf100 CHMP3 MRPS25 NEK10 |     |                                                                     |                  |                  |                    |
| RPL10AP6 EIF4E3 SLC15A2 ATP13A4-AS1 WDR19 RAP1GDS1 CTB       |     |                                                                     |                  |                  |                    |

| Stable4_20PerPair |                            |           |                      |                  |                  |                                                                     |        |          |                   |
|-------------------|----------------------------|-----------|----------------------|------------------|------------------|---------------------------------------------------------------------|--------|----------|-------------------|
| RPL10A            | KLHDC3                     | MED23     | RP1                  | INHBA            | RPS20            | RPL7                                                                | RPL30  | RPL13AP5 | SSH3              |
| RPS12P21          | CREBL2                     | SIPA1L1   | ANP32BP1             | ODF3L1           | JMJD5            | MT1G                                                                | ZDHHC1 |          |                   |
| C16orf7           | RPL23A                     | RPL17     | RPL19                | SDK2             | KIAA1328         | RPL18A                                                              | RPS11  | RPS5     |                   |
| C20orf196         | ZC3H7B                     | SHROOM2   | MCF2                 | VDAC1P6          |                  |                                                                     |        |          |                   |
| GOBPID            | Pvalue                     | OddsRatio | ExpCount             | Count            | Size             | Term                                                                |        |          |                   |
| GO:0006415        | 11                         | 91        | 8.40751245877888e-17 | 85.7103260869565 |                  | translational termination                                           |        |          | 0.214102830253962 |
| GO:0006414        | 11                         | 105       | 4.33612779750617e-16 | 72.8737280296022 |                  | translational elongation                                            |        |          | 0.24704172721611  |
| GO:0006614        | 11                         | 105       | 4.33612779750617e-16 | 72.8737280296022 |                  | SRP-dependent cotranslational protein targeting to membrane         |        |          | 0.24704172721611  |
| GO:0006613        | 11                         | 106       | 4.83110592468598e-16 | 72.1016018306636 |                  | cotranslational protein targeting to membrane                       |        |          | 0.249394505570549 |
| GO:0045047        | 11                         | 106       | 4.83110592468598e-16 | 72.1016018306636 |                  | protein targeting to ER                                             |        |          | 0.249394505570549 |
| GO:0072599        | 11                         | 106       | 4.83110592468598e-16 | 72.1016018306636 |                  | establishment of protein localization to endoplasmic reticulum      |        |          | 0.249394505570549 |
| GO:0043624        | 12                         | 153       | 5.75205039824041e-16 | 55.2263056092843 |                  | cellular protein complex disassembly                                |        |          | 0.359975088229188 |
| GO:0043241        | 12                         | 158       | 8.52251785682823e-16 | 53.3163138231631 |                  | protein complex disassembly                                         |        |          | 0.371738980001384 |
| GO:0070972        | 11                         | 118       | 1.63376664072382e-15 | 63.9618041446566 |                  | protein localization to endoplasmic reticulum                       |        |          | 0.277627845823818 |
| GO:0000184        | 11                         | 119       | 1.79752529619068e-15 | 63.3651368760064 |                  | nuclear-transcribed mRNA catabolic process, nonsense-mediated decay |        |          | 0.279980624178258 |
| GO:0034623        | 174                        | cellular  | 2.75998083956882e-15 | 47.996632996633  | 0.40938343367241 | macromolecular complex disassembly                                  |        |          | 12                |
| GO:0032984        | 12                         | 179       | 3.89294897056301e-15 | 46.5432770821992 |                  | macromolecular complex disassembly                                  |        |          | 0.421147325444606 |
| GO:0019080        | 11                         | 151       | 2.61144042545839e-14 | 48.7723602484472 |                  | viral genome expression                                             |        |          | 0.35526953152031  |
| GO:0019083        | 11                         | 151       | 2.61144042545839e-14 | 48.7723602484472 |                  | viral transcription                                                 |        |          | 0.35526953152031  |
| GO:0006413        | 11                         | 152       | 2.81102848889924e-14 | 48.4230650632131 |                  | translational initiation                                            |        |          | 0.357622309874749 |
| GO:0006612        | 11                         | 153       | 3.02432840322377e-14 | 48.0786895284752 |                  | protein targeting to membrane                                       |        |          | 0.359975088229188 |
| GO:0000956        | 11                         | 169       | 9.14113499326756e-14 | 43.1615299944964 |                  | nuclear-transcribed mRNA catabolic process                          |        |          | 0.397619541900215 |
| GO:0006402        | 11                         | 178       | 1.62388034869741e-13 | 40.8096849778703 |                  | mRNA catabolic process                                              |        |          | 0.418794547090167 |
| GO:0072594        | 11                         | 204       | 7.29402674082471e-13 | 35.2475782833972 |                  | establishment of protein localization to organelle                  |        |          | 0.479966784305584 |
| GO:0006401        | 11                         | 205       | 7.69623482128468e-13 | 35.0634244733303 |                  | RNA catabolic process                                               |        |          | 0.482319562660024 |
| GO:0071845        | 12                         | 284       | 9.82304026513999e-13 | 28.3656417112299 |                  | cellular component disassembly at cellular level                    |        |          | 0.668189052660715 |
| GO:0022411        | 12                         | 288       | 1.15902680630502e-12 | 27.9466403162055 |                  | cellular component disassembly                                      |        |          | 0.677600166078472 |
| GO:0019058        | 11                         | 231       | 2.84176510755388e-12 | 30.8630434782609 |                  | viral infectious cycle                                              |        |          | 0.543491799875441 |
| GO:0022415        | 11                         | 260       | 1.02754949058485e-11 | 27.2128514056225 |                  | viral reproductive process                                          |        |          | 0.611722372154176 |
| GO:0016032        | 11                         | 451       | 3.62519974997775e-09 | 15.1923913043478 |                  | viral reproduction                                                  |        |          | 1.06110303785205  |
| GO:0033365        | 11                         | 473       | 5.95747487152447e-09 | 14.4461697722567 |                  | protein localization to organelle                                   |        |          | 1.11286416164971  |
| GO:0006605        | 11                         | 474       | 6.08988502832755e-09 | 14.4139355808057 |                  | protein targeting                                                   |        |          | 1.11521694000415  |
| Tissue: Thyroid=> | Artery_Tibial              | Type:     | asymmetric           |                  |                  |                                                                     |        |          |                   |
| SourceGene:       | CDC37P1(ENSG00000259982.1) |           |                      |                  |                  |                                                                     |        |          |                   |
| TargetGeneSet:    | RNASEL                     | PPP1R15B  | CNIH3                | RPS7             | MSH2             | MZT2B                                                               | MZT2A  |          |                   |
| COL3A1            | SATB2                      | ZNF860    | CCR5                 | RPL29            | ZNF721           | BEND4                                                               | RPL34  | RPS3A    | FYB               |

| Stable4_20PerPair |                   |           |                      |                  |                   |                                                                     |          |          |                   |
|-------------------|-------------------|-----------|----------------------|------------------|-------------------|---------------------------------------------------------------------|----------|----------|-------------------|
| RPS14             | EDN1              | RPS18     | RPS10                | ZFAND2A          | COL1A2            | RP11                                                                | ENY2     | FAM69B   | SNHG7             |
| TSSC4             | RPL27A            | RPS13     | CTD                  | FAU              | CCDC85B           | CTSC                                                                | YEATS4   | CCDC59   | RPL18AP3          |
| GIT2              | ARL6IP4           | COL4A2    | TRAV18               | CATSPERB         |                   | BNIP2                                                               | RPS3AP6  | HMG1P38  |                   |
| CDC37P1           | ELMO3             | ZFPM1     | RPL13                | RPL27            | PLIN3             | RPL36                                                               | ZNF358   | C19orf43 |                   |
| FXYD1             | ZNF567            | DEDD2     | RPS11                | RRAS             | CACNG6            | RPS9                                                                | PPP1R12C | ZNF579   |                   |
| ZNF865            | RPS5              | MAP1LC3A  |                      | PKIG             | PCIF1             | NEFH                                                                |          |          |                   |
| GOBPID            | Pvalue            | OddsRatio | ExpCount             | Count            | Size              | Term                                                                |          |          |                   |
| GO:0006415        | 16                | 91        | 2.65957599051324e-23 | 80.4042105263158 |                   | translational termination                                           |          |          | 0.340045671579821 |
| GO:0006414        | 16                | 105       | 3.08734828789197e-22 | 67.6901241868717 |                   | translational elongation                                            |          |          | 0.392360390284409 |
| GO:0006614        | 16                | 105       | 3.08734828789197e-22 | 67.6901241868717 |                   | SRP-dependent cotranslational protein targeting to membrane         |          |          | 0.392360390284409 |
| GO:0006613        | 16                | 106       | 3.62715533822434e-22 | 66.9333333333333 |                   | cotranslational protein targeting to membrane                       |          |          | 0.396097155906166 |
| GO:0045047        | 16                | 106       | 3.62715533822434e-22 | 66.9333333333333 |                   | protein targeting to ER                                             |          |          | 0.396097155906166 |
| GO:0072599        | 16                | 106       | 3.62715533822434e-22 | 66.9333333333333 |                   | establishment of protein localization to endoplasmic reticulum      |          |          | 0.396097155906166 |
| GO:0070972        | 16                | 118       | 2.22306795689632e-21 | 59.0092879256966 |                   | protein localization to endoplasmic reticulum                       |          |          | 0.440938343367241 |
| GO:0000184        | 16                | 119       | 2.5619983674375e-21  | 58.4322943280531 |                   | nuclear-transcribed mRNA catabolic process, nonsense-mediated decay |          |          | 0.444675108988997 |
| GO:0019080        | 16                | 151       | 1.34729230239709e-19 | 44.4818713450292 |                   | viral genome expression                                             |          |          | 0.564251608885198 |
| GO:0019083        | 16                | 151       | 1.34729230239709e-19 | 44.4818713450292 |                   | viral transcription                                                 |          |          | 0.564251608885198 |
| GO:0019058        | 18                | 231       | 1.38823242073223e-19 | 33.2957746478873 |                   | viral infectious cycle                                              |          |          | 0.863192858625701 |
| GO:0006413        | 16                | 152       | 1.50203774440156e-19 | 44.1517027863777 |                   | translational initiation                                            |          |          | 0.567988374506954 |
| GO:0006612        | 16                | 153       | 1.67326985126662e-19 | 43.8263542066846 |                   | protein targeting to membrane                                       |          |          | 0.571725140128711 |
| GO:0043624        | 16                | 153       | 1.67326985126662e-19 | 43.8263542066846 |                   | cellular protein complex disassembly                                |          |          | 0.571725140128711 |
| GO:0043241        | 16                | 158       | 2.83883936612228e-19 | 42.2683469236471 |                   | protein complex disassembly                                         |          |          | 0.590408968237492 |
| GO:0006401        | 17                | 205       | 5.8075238810556e-19  | 34.7258481886141 |                   | RNA catabolic process                                               |          |          | 0.766036952460037 |
| GO:0000956        | 16                | 169       | 8.5466593718169e-19  | 39.1991744066047 |                   | nuclear-transcribed mRNA catabolic process                          |          |          | 0.631513390076811 |
| GO:0022415        | 260               |           | 1.1761615366002e-18  | 29.245867768595  | 0.971559061656633 | viral reproductive process                                          |          |          | 18                |
| GO:0034623        | 16                | 174       | 1.37529854420929e-18 | 37.9453697534977 |                   | cellular macromolecular complex disassembly                         |          |          | 0.650197218185593 |
| GO:0006402        | 16                | 178       | 1.99128888750454e-18 | 36.9980506822612 |                   | mRNA catabolic process                                              |          |          | 0.665144280672618 |
| GO:0032984        | 16                | 179       | 2.18128476970743e-18 | 36.7684856312561 |                   | macromolecular complex disassembly                                  |          |          | 0.668881046294374 |
| GO:0072594        | 16                | 204       | 1.81001713496122e-17 | 31.8230683090705 |                   | establishment of protein localization to organelle                  |          |          | 0.762300186838281 |
| GO:0071845        | 284               |           | 1.48037041826462e-16 | 24.315214090495  | 1.06124143657878  | cellular component disassembly at cellular level                    |          |          | 17                |
| GO:0022411        | 17                | 288       | 1.87222646465371e-16 | 23.9495362521193 |                   | cellular component disassembly                                      |          |          | 1.07618849906581  |
| GO:0016032        | 18                | 451       | 1.94146036038663e-14 | 16.1247113163972 |                   | viral reproduction                                                  |          |          | 1.68528129541208  |
| GO:0033365        | 18                | 473       | 4.40832093871633e-14 | 15.3208791208791 |                   | protein localization to organelle                                   |          |          | 1.76749013909072  |
| GO:0006605        | 18                | 474       | 4.57120842919428e-14 | 15.2861842105263 |                   | protein targeting                                                   |          |          | 1.77122690471248  |
| Tissue: Thyroid=> | Artery_Tibial     | Type:     | asymmetric           |                  |                   |                                                                     |          |          |                   |
| SourceGene:       | ENSG00000161149.7 |           |                      |                  |                   |                                                                     |          |          |                   |



Stable4\_20PerPair

| TargetGeneSet: | RP11     | ZNF683    | MIR4426                                                             | U6               | RPL7AP11          | SEC62              | RPL7AP31 |
|----------------|----------|-----------|---------------------------------------------------------------------|------------------|-------------------|--------------------|----------|
| RPL34          | RPL37    | RPS23     | CTD                                                                 | RPS14            | RPS10             | RP3                | RPL24P4  |
| MRPS12         | TOMM7    | RP9       | CTB                                                                 | INSIG1           | STMN4             | UQCRB              | LDHAP4   |
| NHP2P1         | NDUFB8   | USMG5     | RPLP2                                                               | FAU              | KCNJ5             | CYP27B1            | RPS11P5  |
| RPS29          | RPL7AP6  | NDUFB1    | RPL3P4                                                              | MIR1282          | EMP2              | FHOD1              | CCL3L1   |
| SNRPEP4        | RPL36    | C19orf79  | RPS16                                                               | RPS19            | SNRPD2            | RPS11              | NDUFA3   |
| TOMM22         | EEF1B2P3 | RP13      |                                                                     |                  |                   |                    |          |
| GOBPID         | Pvalue   | OddsRatio | ExpCount                                                            | Count            | Size              | Term               |          |
| GO:0006613     | 18       | 106       | 4.35162316180297e-28                                                | 117.163636363636 |                   | 0.315410698221576  |          |
|                |          |           | cotranslational protein targeting to membrane                       |                  |                   |                    |          |
| GO:0006415     | 17       | 91        | 2.93000940157936e-27                                                | 126.651767151767 |                   | 0.270777108850599  |          |
|                |          |           | translational termination                                           |                  |                   |                    |          |
| GO:0006612     | 153      | protein   | 6.03872468444355e-27                                                | 84.330223880597  | 0.455262611583973 | 19                 |          |
|                |          |           | targeting to membrane                                               |                  |                   |                    |          |
| GO:0006414     | 17       | 105       | 4.08057203539776e-26                                                | 106.398601398601 |                   | 0.312435125596844  |          |
|                |          |           | translational elongation                                            |                  |                   |                    |          |
| GO:0006614     | 17       | 105       | 4.08057203539776e-26                                                | 106.398601398601 |                   | 0.312435125596844  |          |
|                |          |           | SRP-dependent cotranslational protein targeting to membrane         |                  |                   |                    |          |
| GO:0045047     | 17       | 106       | 4.85169505409732e-26                                                | 105.195764909248 |                   | 0.315410698221576  |          |
|                |          |           | protein targeting to ER                                             |                  |                   |                    |          |
| GO:0072599     | 17       | 106       | 4.85169505409732e-26                                                | 105.195764909248 |                   | 0.315410698221576  |          |
|                |          |           | establishment of protein localization to endoplasmic reticulum      |                  |                   |                    |          |
| GO:0070972     | 17       | 118       | 3.40182530046741e-25                                                | 92.6195734958111 |                   | 0.351117569718359  |          |
|                |          |           | protein localization to endoplasmic reticulum                       |                  |                   |                    |          |
| GO:0000184     | 17       | 119       | 3.96200299049282e-25                                                | 91.7051282051282 |                   | 0.35409314234309   |          |
|                |          |           | nuclear-transcribed mRNA catabolic process, nonsense-mediated decay |                  |                   |                    |          |
| GO:0072594     | 19       | 204       | 1.77855423505988e-24                                                | 60.8641891891892 |                   | 0.607016815445298  |          |
|                |          |           | establishment of protein localization to organelle                  |                  |                   |                    |          |
| GO:0019080     | 17       | 151       | 2.8000847532111e-23                                                 | 69.6492537313433 |                   | 0.44931146633451   |          |
|                |          |           | viral genome expression                                             |                  |                   |                    |          |
| GO:0019083     | 17       | 151       | 2.8000847532111e-23                                                 | 69.6492537313433 |                   | 0.44931146633451   |          |
|                |          |           | viral transcription                                                 |                  |                   |                    |          |
| GO:0006413     | 152      |           | 3.14728091390126e-23                                                | 69.12849002849   | 0.452287038959242 | 17                 |          |
|                |          |           | translational initiation                                            |                  |                   |                    |          |
| GO:0043624     | 17       | 153       | 3.53461810008498e-23                                                | 68.6153846153846 |                   | 0.455262611583973  |          |
|                |          |           | cellular protein complex disassembly                                |                  |                   |                    |          |
| GO:0043241     | 17       | 158       | 6.24002465385604e-23                                                | 66.1590289143481 |                   | 0.470140474707633  |          |
|                |          |           | protein complex disassembly                                         |                  |                   |                    |          |
| GO:0000956     | 17       | 169       | 2.04168648612479e-22                                                | 61.3238866396761 |                   | 0.502871773579683  |          |
|                |          |           | nuclear-transcribed mRNA catabolic process                          |                  |                   |                    |          |
| GO:0034623     | 17       | 174       | 3.40610328996313e-22                                                | 59.3500734933856 |                   | 0.517749636703342  |          |
|                |          |           | cellular macromolecular complex disassembly                         |                  |                   |                    |          |
| GO:0006402     | 178      | mRNA      | 5.07242152605792e-22                                                | 57.859292881032  | 0.52965192720227  | 17                 |          |
|                |          |           | catabolic process                                                   |                  |                   |                    |          |
| GO:0032984     | 17       | 179       | 5.59508439791447e-22                                                | 57.4981006647673 |                   | 0.532627499827002  |          |
|                |          |           | macromolecular complex disassembly                                  |                  |                   |                    |          |
| GO:0006401     | 17       | 205       | 5.94451087059195e-21                                                | 49.4558101472995 |                   | 0.60999238807003   |          |
|                |          |           | RNA catabolic process                                               |                  |                   |                    |          |
| GO:0019058     | 17       | 231       | 4.6818076760367e-20                                                 | 43.3677210639827 |                   | 0.687357276313058  |          |
|                |          |           | viral infectious cycle                                              |                  |                   |                    |          |
| GO:0022415     | 17       | 260       | 3.56191690710266e-19                                                | 38.1141183918962 |                   | 0.773648882430282  |          |
|                |          |           | viral reproductive process                                          |                  |                   |                    |          |
| GO:0006605     | 474      | protein   | 6.6909496371469e-19                                                 | 26.7266807125072 |                   | 1.4104214241229    | 20       |
|                |          |           | targeting                                                           |                  |                   |                    |          |
| GO:0071845     | 17       | 284       | 1.60523228930624e-18                                                | 34.6293575338519 |                   | 0.845062625423846  |          |
|                |          |           | cellular component disassembly at cellular level                    |                  |                   |                    |          |
| GO:0022411     | 17       | 288       | 2.03608818542751e-18                                                | 34.1085722395686 |                   | 0.856964915922773  |          |
|                |          |           | cellular component disassembly                                      |                  |                   |                    |          |
| GO:0033365     | 19       | 473       | 1.65005985964397e-17                                                | 24.3324155653451 |                   | 1.40744585149817   |          |
|                |          |           | protein localization to organelle                                   |                  |                   |                    |          |
| GO:0016032     | 17       | 451       | 3.74552213027413e-15                                                | 21.0526409074796 |                   | 1.34198325375407   |          |
|                |          |           | viral reproduction                                                  |                  |                   |                    |          |
| GO:0042274     |          |           | 2.01711012928941e-07                                                | 105.450549450549 |                   | 0.0535603072451733 |          |

Stable4\_20PerPair

|                                                 |          |                                                                     |                  |                   |         |                   |                      |
|-------------------------------------------------|----------|---------------------------------------------------------------------|------------------|-------------------|---------|-------------------|----------------------|
| 4                                               | 18       | ribosomal small subunit biogenesis                                  |                  |                   |         |                   |                      |
| GO:0042773                                      |          | 1.10436984124632e-05                                                | 34.2635658914729 |                   |         | 0.139851913362397 |                      |
| 4                                               | 47       | ATP synthesis coupled electron transport                            |                  |                   |         |                   |                      |
| GO:0042775                                      |          | 1.10436984124632e-05                                                | 34.2635658914729 |                   |         | 0.139851913362397 |                      |
| 4                                               | 47       | mitochondrial ATP synthesis coupled electron transport              |                  |                   |         |                   |                      |
| Tissue: Artery_Tibial=>Thyroid Type: asymmetric |          |                                                                     |                  |                   |         |                   |                      |
| SourceGene: FAM198A(ENSG00000144649.4)          |          |                                                                     |                  |                   |         |                   |                      |
| TargetGeneSet:                                  | MRPL20   | TMEM52                                                              | PEX10            | RPL11             | RP11    | PSMB4             | UBC RPL37A           |
| RPL32                                           | MUSTN1   | FAM19A1                                                             | ALG1L            | RPS14             | C6orf48 | TCTE1             | TOMM7 RPL30 RPL13AP5 |
| EIF3M                                           | FAU      | CTD                                                                 | PHB2             | ATP5G2            | WDR90   | TCEB2             | POLR2C RPS12P27      |
| CENPV                                           | RPL17    | RPL27                                                               | RPS15            | XAB2              | SNRPD2  | RPS11             | RP4 CRYZL1 MRPL40    |
| MAGT1                                           |          |                                                                     |                  |                   |         |                   |                      |
| GOBPID                                          | Pvalue   | OddsRatio                                                           | ExpCount         | Count             | Size    | Term              |                      |
| GO:0019080                                      |          | 6.1554212472483e-19                                                 | 84.0996376811594 |                   |         | 0.303024012179088 |                      |
| 13                                              | 151      | viral genome expression                                             |                  |                   |         |                   |                      |
| GO:0019083                                      |          | 6.1554212472483e-19                                                 | 84.0996376811594 |                   |         | 0.303024012179088 |                      |
| 13                                              | 151      | viral transcription                                                 |                  |                   |         |                   |                      |
| GO:0006415                                      |          | 1.04293495901498e-17                                                | 109.556944444444 |                   |         | 0.182617119922497 |                      |
| 11                                              | 91       | translational termination                                           |                  |                   |         |                   |                      |
| GO:0072594                                      |          | 3.35013978170808e-17                                                | 60.5376308900524 |                   |         | 0.40938343367241  |                      |
| 13                                              | 204      | establishment of protein localization to organelle                  |                  |                   |         |                   |                      |
| GO:0006413                                      |          | 5.25490439834157e-17                                                | 72.0100840336135 |                   |         | 0.305030793716698 |                      |
| 12                                              | 152      | translational initiation                                            |                  |                   |         |                   |                      |
| GO:0006414                                      |          | 5.40296037411533e-17                                                | 93.1489361702128 |                   |         | 0.210712061449035 |                      |
| 11                                              | 105      | translational elongation                                            |                  |                   |         |                   |                      |
| GO:0006614                                      |          | 5.40296037411533e-17                                                | 93.1489361702128 |                   |         | 0.210712061449035 |                      |
| 11                                              | 105      | SRP-dependent cotranslational protein targeting to membrane         |                  |                   |         |                   |                      |
| GO:0006613                                      |          | 6.02164137774053e-17                                                | 92.1619883040936 |                   |         | 0.212718842986645 |                      |
| 11                                              | 106      | cotranslational protein targeting to membrane                       |                  |                   |         |                   |                      |
| GO:0045047                                      |          | 6.02164137774053e-17                                                | 92.1619883040936 |                   |         | 0.212718842986645 |                      |
| 11                                              | 106      | protein targeting to ER                                             |                  |                   |         |                   |                      |
| GO:0072599                                      |          | 6.02164137774053e-17                                                | 92.1619883040936 |                   |         | 0.212718842986645 |                      |
| 11                                              | 106      | establishment of protein localization to endoplasmic reticulum      |                  |                   |         |                   |                      |
| GO:0019058                                      |          | 1.71709935812202e-16                                                | 52.9392201834862 |                   |         | 0.463566535187876 |                      |
| 13                                              | 231      | viral infectious cycle                                              |                  |                   |         |                   |                      |
| GO:0070972                                      |          | 2.04419473587998e-16                                                | 81.757528556594  | 0.236800221437963 |         | 11                |                      |
| 118                                             | protein  | localization to endoplasmic reticulum                               |                  |                   |         |                   |                      |
| GO:0000184                                      |          | 2.2498105684425e-16                                                 | 80.9948559670782 |                   |         | 0.238807002975573 |                      |
| 11                                              | 119      | nuclear-transcribed mRNA catabolic process, nonsense-mediated decay |                  |                   |         |                   |                      |
| GO:0022415                                      |          | 8.05900844682899e-16                                                | 46.6282894736842 |                   |         | 0.521763199778562 |                      |
| 13                                              | 260      | viral reproductive process                                          |                  |                   |         |                   |                      |
| GO:0006612                                      |          | 3.82665601067179e-15                                                | 61.4553990610329 |                   |         | 0.307037575254308 |                      |
| 11                                              | 153      | protein targeting to membrane                                       |                  |                   |         |                   |                      |
| GO:0043624                                      |          | 3.82665601067179e-15                                                | 61.4553990610329 |                   |         | 0.307037575254308 |                      |
| 11                                              | 153      | cellular protein complex disassembly                                |                  |                   |         |                   |                      |
| GO:0043241                                      |          | 5.48420494375765e-15                                                | 59.3442932728647 |                   |         | 0.317071482942357 |                      |
| 11                                              | 158      | protein complex disassembly                                         |                  |                   |         |                   |                      |
| GO:0000956                                      |          | 1.16255646827721e-14                                                | 55.1701828410689 |                   |         | 0.339146079856065 |                      |
| 11                                              | 169      | nuclear-transcribed mRNA catabolic process                          |                  |                   |         |                   |                      |
| GO:0034623                                      |          | 1.60854144364843e-14                                                | 53.459100204499  | 0.349179987544115 |         | 11                |                      |
| 174                                             | cellular | macromolecular complex disassembly                                  |                  |                   |         |                   |                      |
| GO:0006402                                      |          | 2.0711872234438e-14                                                 | 52.164005322688  | 0.357207113694554 |         | 11                |                      |
| 178                                             | mRNA     | catabolic process                                                   |                  |                   |         |                   |                      |
| GO:0032984                                      |          | 2.20425535631333e-14                                                | 51.8498677248677 |                   |         | 0.359213895232164 |                      |
| 11                                              | 179      | macromolecular complex disassembly                                  |                  |                   |         |                   |                      |
| GO:0016032                                      |          | 3.44467018415915e-14                                                | 29.8688024408848 |                   |         | 0.905058473462044 |                      |
| 14                                              | 451      | viral reproduction                                                  |                  |                   |         |                   |                      |
| GO:0006401                                      |          | 9.9014971193746e-14                                                 | 44.8190148911798 |                   |         | 0.41139021521002  |                      |
| 11                                              | 205      | RNA catabolic process                                               |                  |                   |         |                   |                      |
| GO:0033365                                      |          | 1.76897757278393e-12                                                | 24.6611413043478 |                   |         | 0.949207667289461 |                      |
| 13                                              | 473      | protein localization to organelle                                   |                  |                   |         |                   |                      |
| GO:0006605                                      |          | 1.81693803399836e-12                                                | 24.6058839479393 |                   |         | 0.951214448827071 |                      |
| 13                                              | 474      | protein targeting                                                   |                  |                   |         |                   |                      |

Stable4\_20PerPair

|                                                 |                      |                                                                     |                          |
|-------------------------------------------------|----------------------|---------------------------------------------------------------------|--------------------------|
| GO:0071845                                      | 3.5201848940134e-12  | 31.6725681725682                                                    | 0.569925956681198        |
| 11                                              | 284                  | cellular component disassembly at cellular level                    |                          |
| GO:0022411                                      | 4.09790316936296e-12 | 31.2063778580024                                                    | 0.577953082831638        |
| 11                                              | 288                  | cellular component disassembly                                      |                          |
| Tissue: Thyroid=>Artery_Tibial Type: asymmetric |                      |                                                                     |                          |
| SourceGene: HEBP2(ENSG00000051620.5)            |                      |                                                                     |                          |
| TargetGeneSet:                                  | TRNAU1AP             | RPS8                                                                | RP11 HSPB11 RPS27        |
| MZT2A                                           | RPL15 DAG1 RPL29     | CEP70                                                               | RPS3A SAP30 CCNO         |
| RPS10                                           | FAM135A RPL7A        | RPS13                                                               | EHD1 FAU NDUFA4L2        |
| SIVA1                                           | MT2A RPL13           | SNORD3A                                                             | RPL23A RPL27 RPL17 RPL36 |
| ZNF461                                          | RPS16 ITPKC          | RPS19                                                               | OPA3 RPS11 A1BG RPS5     |
| C22orf23                                        | RPS19BP1             | RPS23P8                                                             | RPS4X                    |
| GOBPID                                          | Pvalue               | OddsRatio                                                           | ExpCount Count Size Term |
| GO:0006414                                      | 1.68042319824457e-40 | 251.211890243902                                                    | 0.283371392983185        |
| 23                                              | 105                  | translational elongation                                            |                          |
| GO:0006415                                      | 1.15013307802615e-39 | 269.007672634271                                                    | 0.245588540585427        |
| 22                                              | 91                   | translational termination                                           |                          |
| GO:0006614                                      | 3.9270726550027e-38  | 223.41459957477                                                     | 0.283371392983185 22     |
| 105                                             |                      | SRP-dependent cotranslational protein targeting to membrane         |                          |
| GO:0006613                                      | 4.94997699629574e-38 | 220.739495798319                                                    | 0.286070168154453        |
| 22                                              | 106                  | cotranslational protein targeting to membrane                       |                          |
| GO:0045047                                      | 4.94997699629574e-38 | 220.739495798319                                                    | 0.286070168154453        |
| 22                                              | 106                  | protein targeting to ER                                             |                          |
| GO:0072599                                      | 4.94997699629574e-38 | 220.739495798319                                                    | 0.286070168154453        |
| 22                                              | 106                  | establishment of protein localization to endoplasmic reticulum      |                          |
| GO:0070972                                      | 6.66930706644978e-37 | 192.985294117647                                                    | 0.318455470209674        |
| 22                                              | 118                  | protein localization to endoplasmic reticulum                       |                          |
| GO:0000184                                      | 8.17265548794994e-37 | 190.98241358399                                                     | 0.321154245380943 22     |
| 119                                             |                      | nuclear-transcribed mRNA catabolic process, nonsense-mediated decay |                          |
| GO:0019080                                      | 2.3584611271864e-34  | 143.285909712722                                                    | 0.407515050861532        |
| 22                                              | 151                  | viral genome expression                                             |                          |
| GO:0019083                                      | 2.3584611271864e-34  | 143.285909712722                                                    | 0.407515050861532        |
| 22                                              | 151                  | viral transcription                                                 |                          |
| GO:0006413                                      | 2.75445166416166e-34 | 142.173755656109                                                    | 0.4102138260328 22       |
| 152                                             |                      | translational initiation                                            |                          |
| GO:0006612                                      | 3.21337533899315e-34 | 141.078581050741                                                    | 0.412912601204069        |
| 22                                              | 153                  | protein targeting to membrane                                       |                          |
| GO:0043624                                      | 3.21337533899315e-34 | 141.078581050741                                                    | 0.412912601204069        |
| 22                                              | 153                  | cellular protein complex disassembly                                |                          |
| GO:0043241                                      | 6.83317452860222e-34 | 135.844290657439                                                    | 0.426406477060411        |
| 22                                              | 158                  | protein complex disassembly                                         |                          |
| GO:0000956                                      | 3.29301516299787e-33 | 125.582232893157                                                    | 0.456093003944364        |
| 22                                              | 169                  | nuclear-transcribed mRNA catabolic process                          |                          |
| GO:0034623                                      | 6.49128334689652e-33 | 121.40866873065                                                     | 0.469586879800706 22     |
| 174                                             |                      | cellular macromolecular complex disassembly                         |                          |
| GO:0006402                                      | 1.10059555255609e-32 | 118.262443438914                                                    | 0.48038198048578         |
| 22                                              | 178                  | mRNA catabolic process                                              |                          |
| GO:0032984                                      | 1.25339068946911e-32 | 117.500936680405                                                    | 0.483080755657048        |
| 22                                              | 179                  | macromolecular complex disassembly                                  |                          |
| GO:0072594                                      | 2.56527150823439e-31 | 101.182934712346                                                    | 0.550550134938759        |
| 22                                              | 204                  | establishment of protein localization to organelle                  |                          |
| GO:0006401                                      | 2.87038799609198e-31 | 100.622950819672                                                    | 0.553248910110027        |
| 22                                              | 205                  | RNA catabolic process                                               |                          |
| GO:0022415                                      | 8.03852694519248e-31 | 85.9770569620253                                                    | 0.70168154452979         |
| 23                                              | 260                  | viral reproductive process                                          |                          |
| GO:0019058                                      | 4.41503190645081e-30 | 87.9442724458204                                                    | 0.623417064563006        |
| 22                                              | 231                  | viral infectious cycle                                              |                          |
| GO:0071845                                      | 4.76474345512123e-28 | 69.892231701841                                                     | 0.766452148640232 22     |
| 284                                             |                      | cellular component disassembly at cellular level                    |                          |
| GO:0022411                                      | 6.52897562544952e-28 | 68.8217602830606                                                    | 0.777247249325306        |
| 22                                              | 288                  | cellular component disassembly                                      |                          |
| GO:0016032                                      | 3.19356796554016e-25 | 46.9672897196262                                                    | 1.21714760224206         |
| 23                                              | 451                  | viral reproduction                                                  |                          |

Stable4\_20PerPair

|                                |                         |                                    |                    |
|--------------------------------|-------------------------|------------------------------------|--------------------|
| GO:0033365                     | 9.57811070796263e-25    | 44.6008333333333                   | 1.27652065600996   |
| 23                             | 473                     | protein localization to organelle  |                    |
| GO:0006605                     | 1.00555545696715e-24    | 44.4987527716186                   | 1.27921943118123   |
| 23                             | 474                     | protein targeting                  |                    |
| GO:0042274                     | 1.34855588817041e-07    | 117.534693877551                   | 0.0485779530828316 |
| 4                              | 18                      | ribosomal small subunit biogenesis |                    |
| Tissue: Artery_Tibial=>Thyroid | Type: asymmetric        |                                    |                    |
| SourceGene:                    | HES1(ENSG00000114315.3) |                                    |                    |
| TargetGeneSet:                 | UBE2J2                  | DFFB                               | ERRFI1             |
| NECAP2                         | UBXN10                  | SRRM1                              | CNKSRI             |
| ZMYM1                          | LSM10                   | SLFNL1                             | CCDC24             |
| PSMA5                          | ATXN7L2                 | CEPT1                              | DDX20              |
| PYG02                          | FLAD1                   | CLK2                               | CCT3               |
| PTGS2                          | BTG2                    | SOX13                              | IRF6               |
| PYCR2                          | ZNF678                  | COG2                               | C1orf131           |
| FAM98A                         | PAPOLG                  | RAB1A                              | PCBP1-AS1          |
| C2orf29                        | POLR1B                  | SCTR                               | CHN1               |
| TTLL4                          | NHEJ1                   | SP100                              | PSMD1              |
| METTL6                         | ACAA1                   | GORASP1                            | ZNF619             |
| ARL4D                          | MINA                    | ABHD10                             | QTRTD1             |
| PLXNA1                         | C3orf25                 | SRPRB                              | SLC2A1             |
| ACTL6A                         | ABCF3                   | ALG3                               | POLR2H             |
| MRFAP1L1                       |                         | TBC1D1                             | NFXL1              |
| CASP6                          | ANKRD50                 | MFAP3L                             | STOX2              |
| HMGCR                          | ZCCHC9                  | PHAX                               | HARS2              |
| PFDN6                          | ZBTB9                   | PPIL1                              | TAF8               |
| C6orf203                       |                         | GOPC                               | MCM9               |
| ZNF107                         | BAZ1B                   | RUNDC3B                            | CNPY4              |
| TRIM24                         | PRSS37                  | OR9A3P                             | ZNF786             |
| INTS8                          | GRHL2                   | TRIB1                              | ZNF623             |
| STOML2                         | FAM214B                 | FXN                                | CEP78              |
| TRIM32                         | DOLPP1                  | EXOSC2                             | SLC2A6             |
| NUDT5                          | ZFAND4                  | SYT15                              | C10orf128          |
| SUFU                           | MXI1                    | STK32C                             | ZNF511             |
| MPPED2                         | CELF1                   | TMEM216                            | TTC9C              |
| PICALM                         | FAM76B                  | MSANTD4                            | RDX                |
| C2CD2L                         | ZNF202                  | HYLS1                              | VPS26B             |
| TARBP2                         | HOCX6                   | SUOX                               | TIMELESS           |
| ANAPC7                         | DYNLL1                  | SNRNP35                            | GOLGA3             |
| THSD1                          | LMO7                    | PCID2                              | TTC5               |
| SOCS6                          | BCRP2                   | DPF3                               | MLH3               |
| ZFYVE19                        | LCMT2                   | SLC24A5                            | AP4E1              |
| ANP32A                         | CSK                     | SCAMP2                             | CHD2               |
| C16orf88                       |                         | UBFD1                              | NDUFAB1            |
| FBXL19                         | ZNF668                  | CNEP1R1                            | HEATR3             |
| ZNRF1                          | PLCG2                   | MAP1LC3B                           | ZC3H18             |
| SLC16A13                       |                         | ARHGEF15                           | KRBA2              |
| C17orf51                       |                         | CRLF3                              | CDK5R1             |
| RUNDC1                         | UBTF                    | DLX3                               | PPP1R9B            |
| FAM104A                        | ICT1                    | HN1                                | TRIM65             |
| LMNB2                          | ZNF555                  | PIAS4                              | DPP9               |
| ZNF490                         | WDR83                   | LYL1                               | IL27RA             |
| RAB3A                          | ZNF91                   | ANKRD27                            | KCTD15             |
| ZNF526                         | GEMIN7                  | OPA3                               | FBXO46             |
| U2AF2                          | ZNF264                  | ZNF543                             | ZNF547             |
| NOP56                          | PCNA                    | GZF1                               | C20orf160          |
| ZSWIM3                         | ZSWIM1                  | NCOA5                              | ELMO2              |
| TCFL5                          | SOX18                   | RGS19                              | RBM11              |
| UBE2L3                         | ZNF280B                 | ZNF70                              | SGSM1              |
| ZNF41                          | PPP1R3F                 | WNK3                               | RPL23AP83          |
| NAA10                          | LAGE3                   |                                    |                    |
| GOBPID                         | Pvalue                  | ExpCount                           | Count              |
| GO:0031060                     | 2.1966285289602e-06     | 22.2522427440633                   |                    |

Stable4\_20PerPair

| GO:ID      | Count            | Size              | Term                                                                |
|------------|------------------|-------------------|---------------------------------------------------------------------|
| GO:0006614 | 183.576923076923 | 0.392360390284409 | SRP-dependent cotranslational protein targeting to membrane         |
| GO:0006613 | 181.240506329114 | 0.396097155906166 | cotranslational protein targeting to membrane                       |
| GO:0045047 | 181.240506329114 | 0.396097155906166 | protein targeting to ER                                             |
| GO:0072599 | 181.240506329114 | 0.396097155906166 | establishment of protein localization to endoplasmic reticulum      |
| GO:0006415 | 204.742857142857 | 0.340045671579821 | translational termination                                           |
| GO:0070972 | 157.208791208791 | 0.440938343367241 | protein localization to endoplasmic reticulum                       |
| GO:0000184 | 155.489130434783 | 0.444675108988997 | nuclear-transcribed mRNA catabolic process, nonsense-mediated decay |
| GO:0006414 | 168.294755877034 | 0.392360390284409 | translational elongation                                            |
| GO:0006413 | 123.95905707196  | 0.567988374506954 | translational initiation                                            |
| GO:0006612 | 113.261904761905 | 0.571725140128711 | protein targeting to membrane                                       |
| GO:0000956 | 100.387323943662 | 0.631513390076811 | nuclear-transcribed mRNA catabolic process                          |
| GO:0019080 | 106.020571428571 | 0.564251608885198 | viral genome expression                                             |
| GO:0019083 | 106.020571428571 | 0.564251608885198 | viral transcription                                                 |
| GO:0006402 | 94.3443708609272 | 0.665144280672618 | mRNA catabolic process                                              |
| GO:0043624 | 104.33633295838  | 0.571725140128711 | cellular protein complex disassembly                                |
| GO:0043241 | 100.349025974026 | 0.590408968237492 | protein complex disassembly                                         |
| GO:0034623 | 89.4000965250965 | 0.650197218185593 | cellular macromolecular complex disassembly                         |
| GO:0072594 | 80.3389830508475 | 0.762300186838281 | establishment of protein localization to organelle                  |
| GO:0006401 | 79.8820224719101 | 0.766036952460037 | RNA catabolic process                                               |
| GO:0032984 | 86.4481792717087 | 0.668881046294374 | macromolecular complex disassembly                                  |
| GO:0019058 | 64.2843205574913 | 0.863192858625701 | viral infectious cycle                                              |
| GO:0022415 | 56.2023809523809 | 0.971559061656633 | viral reproductive process                                          |
| GO:0071845 | 50.8878737541528 | 1.06124143657878  | cellular component disassembly at cellular level                    |
| GO:0022411 | 50.0967829880044 | 1.07618849906581  | cellular component disassembly                                      |
| GO:0033365 | 31.280269058296  | 1.76749013909072  | protein localization to organelle                                   |
| GO:0006605 | 31.2080536912752 | 1.77122690471248  | protein targeting                                                   |

Stable4\_20PerPair

|                                             |                                                                     |                         |                    |    |  |
|---------------------------------------------|---------------------------------------------------------------------|-------------------------|--------------------|----|--|
| GO:0016032                                  | 2.92028648718522e-25                                                | 30.5270588235294        | 1.68528129541208   |    |  |
| 26 451                                      | viral reproduction                                                  |                         |                    |    |  |
| GO:0042273                                  | 4.67891000109376e-10                                                | 209.766763848396        | 0.0448411874610754 |    |  |
| 5 12                                        | ribosomal large subunit biogenesis                                  |                         |                    |    |  |
| GO:0022613                                  | 9.0147554393954e-09                                                 | 14.9915433403806        | 0.840772264895163  |    |  |
| 10 225                                      | ribonucleoprotein complex biogenesis                                |                         |                    |    |  |
| GO:0071843                                  | 1.60445580432567e-08                                                | 14.061135371179         | 0.893086983599751  | 10 |  |
| 239                                         | cellular component biogenesis at cellular level                     |                         |                    |    |  |
| GO:0042254                                  | 7.36950037898148e-08                                                | 17.5837187789084        | 0.556778077641686  |    |  |
| 8 149                                       | ribosome biogenesis                                                 |                         |                    |    |  |
| GO:0006364                                  | 1.09399988477819e-07                                                | 21.9565694231191        | 0.388623624662653  |    |  |
| 7 104                                       | rRNA processing                                                     |                         |                    |    |  |
| GO:0016072                                  | 1.61093682834633e-07                                                | 20.6688700681677        | 0.411044218393191  |    |  |
| 7 110                                       | rRNA metabolic process                                              |                         |                    |    |  |
| GO:0034660                                  | 9.72266698510121e-07                                                | 10.2326086956522        | 1.06497820220054   |    |  |
| 9 285                                       | ncRNA metabolic process                                             |                         |                    |    |  |
| GO:0034470                                  | 8.94038674369838e-06                                                | 10.9610847756587        | 0.747353124351256  |    |  |
| 7 200                                       | ncRNA processing                                                    |                         |                    |    |  |
| Tissue: Artery_Tibial=>Thyroid              | Type: asymmetric                                                    |                         |                    |    |  |
| SourceGene:                                 | LYZ(ENSG00000090382.2)                                              |                         |                    |    |  |
| TargetGeneSet:                              | VWA1 RPL22 RPL5 RP11 KCNC4-AS1 CSDE1 NGF                            |                         |                    |    |  |
| SPRR1B RPS27                                | C1orf43 RGS2 TOMM20 RPS7 CCDC104 OLA1 IHH C3orf32                   |                         |                    |    |  |
| RPL15 RPL14                                 | IMPDH2 RPL24 POLQ GATA2 WDR19 SLC10A4 CCNI ELMOD2 HHIP              |                         |                    |    |  |
| RPS3A BTF3                                  | CTB GNB2L1 RPL15P3 HLA-H RPL10A RP1 EEF1A1 ELFN1                    |                         |                    |    |  |
| CYP3A5 LRRC4                                | CDCA2 DUSP26 RPL7 EIF3E EIF3H RPS6 RPL35 SET                        |                         |                    |    |  |
| EEF1A1P5                                    | RPL7A WAC IPO7 RASSF10 TAF6L EHD1 SAC3D1 MMP3                       |                         |                    |    |  |
| AMIGO2 RPL14P1                              | LEMD3 LYZ NAP1L1 SLC9A7P1 RPL6 POMP TPT1                            |                         |                    |    |  |
| CCNB1IP1                                    | C14orf166 SEC11A RSL1D1 BFAR RPS15A MT1F RTN4RL1                    |                         |                    |    |  |
| INCA1 RPL26                                 | RPL23A RPL17 CTD ATP8B3 LYL1 RPL18A C19orf60 LIPE                   |                         |                    |    |  |
| EXOC3L2 FBXO46                              | PLEKHA4 RPS11 RPL28 RPS5 AHCY SNX21 SOX18 EIF3L                     |                         |                    |    |  |
| C22orf46                                    | SYP RPS4X RPSAP9 PLXNB3 FAM3A                                       |                         |                    |    |  |
| GOBPID                                      | Pvalue OddsRatio ExpCount Count Size Term                           |                         |                    |    |  |
| GO:0006414                                  | 1.28219985360447e-32                                                | 70.5481481481481        | 0.610338384886859  |    |  |
| 24 105                                      | translational elongation                                            |                         |                    |    |  |
| GO:0006614                                  | 1.28219985360447e-32                                                | 70.5481481481481        | 0.610338384886859  |    |  |
| 24 105                                      | SRP-dependent cotranslational protein targeting to membrane         |                         |                    |    |  |
| GO:0006613                                  | 1.65082798032538e-32                                                | 69.6829268292683        | 0.616151131409591  |    |  |
| 24 106                                      | cotranslational protein targeting to membrane                       |                         |                    |    |  |
| GO:0045047                                  | 1.65082798032538e-32                                                | 69.6829268292683        | 0.616151131409591  |    |  |
| 24 106                                      | protein targeting to ER                                             |                         |                    |    |  |
| GO:0072599                                  | 1.65082798032538e-32                                                | 69.6829268292683        | 0.616151131409591  |    |  |
| 24 106                                      | establishment of protein localization to endoplasmic reticulum      |                         |                    |    |  |
| GO:0006415                                  | 2.23213933103101e-32                                                | 79.2856798457088        | 0.528959933568611  |    |  |
| 23 91                                       | translational termination                                           |                         |                    |    |  |
| GO:0006413                                  | 8.4233156010459e-32                                                 | 50.6658456486043        | 0.883537471455263  |    |  |
| 26 152                                      | translational initiation                                            |                         |                    |    |  |
| GO:0070972                                  | 2.81039982626144e-31                                                | 60.736170212766         | 0.685904089682375  | 24 |  |
| 118                                         | protein localization to endoplasmic reticulum                       |                         |                    |    |  |
| GO:0000184                                  | 3.5062605041112e-31                                                 | 60.0926315789474        | 0.691716836205107  |    |  |
| 24 119                                      | nuclear-transcribed mRNA catabolic process, nonsense-mediated decay |                         |                    |    |  |
| GO:0006612                                  | 2.28515658252251e-28                                                | 44.1488372093023        | 0.889350217977995  |    |  |
| 24 153                                      | protein targeting to membrane                                       |                         |                    |    |  |
| GO:0000956                                  | 2.8176107971175e-27                                                 | 39.2331034482759        | 0.982354162341706  |    |  |
| 24 169                                      | nuclear-transcribed mRNA catabolic process                          |                         |                    |    |  |
| GO:0034623                                  | 5.85431298116393e-27                                                | 37.912 1.01141789495537 | 24 174             |    |  |
| cellular macromolecular complex disassembly |                                                                     |                         |                    |    |  |
| GO:0019080                                  | 7.16972779958561e-27                                                | 41.9437756147541        | 0.877724724932531  |    |  |
| 23 151                                      | viral genome expression                                             |                         |                    |    |  |
| GO:0019083                                  | 7.16972779958561e-27                                                | 41.9437756147541        | 0.877724724932531  |    |  |
| 23 151                                      | viral transcription                                                 |                         |                    |    |  |
| GO:0072594                                  | 9.2505363782843e-27                                                 | 33.5858346747467        | 1.18580029063733   |    |  |
| 25 204                                      | establishment of protein localization to organelle                  |                         |                    |    |  |
| GO:0043624                                  | 9.86168389136766e-27                                                | 41.2926860025221        | 0.889350217977995  |    |  |

Stable4\_20PerPair

|                                |          |                                                  |                  |                    |          |           |           |                   |          |
|--------------------------------|----------|--------------------------------------------------|------------------|--------------------|----------|-----------|-----------|-------------------|----------|
| 23                             | 153      | cellular protein complex disassembly             |                  |                    |          |           |           |                   |          |
| GO:0006402                     |          | 1.03365059022287e-26                             | 36.9168831168831 |                    |          |           |           | 1.03466888104629  |          |
| 24                             | 178      | mRNA catabolic process                           |                  |                    |          |           |           |                   |          |
| GO:0032984                     |          | 1.18888940060951e-26                             | 36.6761290322581 |                    |          |           |           | 1.04048162756903  |          |
| 24                             | 179      | macromolecular complex disassembly               |                  |                    |          |           |           |                   |          |
| GO:0043241                     |          | 2.1451797018786e-26                              | 39.7493624772313 |                    |          |           |           | 0.918413950591655 |          |
| 23                             | 158      | protein complex disassembly                      |                  |                    |          |           |           |                   |          |
| GO:0006401                     |          | 3.43348159778401e-25                             | 31.3502762430939 |                    |          |           |           | 1.19161303716006  |          |
| 24                             | 205      | RNA catabolic process                            |                  |                    |          |           |           |                   |          |
| GO:0071845                     |          | 4.10172742036373e-23                             | 23.0809501995943 |                    |          |           |           | 1.65082001245589  |          |
| 25                             | 284      | cellular component disassembly at cellular level |                  |                    |          |           |           |                   |          |
| GO:0022411                     |          | 5.81602459443904e-23                             | 22.7234645872269 |                    |          |           |           | 1.67407099854681  |          |
| 25                             | 288      | cellular component disassembly                   |                  |                    |          |           |           |                   |          |
| GO:0019058                     |          | 1.71592017692334e-22                             | 25.6665353089533 |                    |          |           |           | 1.34274444675109  |          |
| 23                             | 231      | viral infectious cycle                           |                  |                    |          |           |           |                   |          |
| GO:0022415                     |          | 2.63356083777877e-21                             | 22.4797675866362 |                    |          |           |           | 1.51131409591032  |          |
| 23                             | 260      | viral reproductive process                       |                  |                    |          |           |           |                   |          |
| GO:0033365                     |          | 7.49727073773741e-19                             | 13.9597315436242 |                    |          |           |           | 2.74942910525223  |          |
| 26                             | 473      | protein localization to organelle                |                  |                    |          |           |           |                   |          |
| GO:0006605                     |          | 7.90080609728781e-19                             | 13.9275708128079 |                    |          |           |           | 2.75524185177496  |          |
| 26                             | 474      | protein targeting                                |                  |                    |          |           |           |                   |          |
| GO:0016032                     |          | 5.83811772398419e-16                             | 12.279646085491  | 2.62154868175213   |          |           |           |                   | 23       |
| 451                            |          | viral reproduction                               |                  |                    |          |           |           |                   |          |
| GO:0042273                     |          | 5.07494776283997e-07                             | 89.74375         | 0.0697529582727839 |          |           |           |                   | 4        |
| 12                             |          | ribosomal large subunit biogenesis               |                  |                    |          |           |           |                   |          |
| Tissue: Artery_Tibial=>Thyroid |          | Type: asymmetric                                 |                  |                    |          |           |           |                   |          |
| SourceGene:                    |          | MLX(ENSG00000108788.6)                           |                  |                    |          |           |           |                   |          |
| TargetGeneSet:                 | UBE2J2   | RP4                                              | NOL9             | DNAJC11            | RP11     | DFFA      | DNAJC16   | ARHGEF19          |          |
| ARHGEF19-AS1                   | CROCCP3  | ATP13A2                                          | RCC2             | KDM1A              | TCEB3    | LDLRAP1   | SEPN1     | XKR8              | EYA3     |
| MED18                          | RCC1     | PRDX3P2                                          | GMEB1            | SNRNP40            | HDAC1    | ZMYM1     | NCN       | RNF220            | MMACHC   |
| TTC22                          | GADD45A  | FRRS1                                            | CYB561D1         | AMIGO1             | HSD3BP5  | ANKRD34A  |           | RPRD2             |          |
| GOLPH3L                        | LYSMD1   | SNX27                                            | THEM4            | PYGO2              | FLAD1    | RUSC1-AS1 | UBQLN4    | RRNAD1            |          |
| USP21                          | METTL13  | MRPS14                                           | BAP1             | INTS7              | TMEM206  | PARP1     | PYCR2     | COG2              | C1orf131 |
| ZNF238                         | ADSS     | PGBD2                                            | SMC6             | PGAM1P6            | C2orf44  | DNMT3A    | C2orf18   | TMEM214           | PREB     |
| SLC5A6                         | EIF2B4   | PPM1G                                            | CCDC121          | EHD3               | FAM98A   | GEMIN6    | PCBP1-AS1 |                   | CCT7     |
| CCDC142                        | AUP1     | ART4                                             | MRPL15           | GGCX               | C2orf68  | MRPL35    | RMND5A    | ZNF2              | C2orf29  |
| POLR1B                         | FOXD4L1  | AMMECR1L                                         |                  | ORC2               | TTLL4    | EIF4E2    | ASB1      | DTYMK             | RPUSD3   |
| CHCHD4                         | ACAA1    | MYD88                                            | GORASP1          | ZNF445             | PTH1R    | KLHL18    | CTD       | NME6              | SLC25A20 |
| NPRL2                          | ARL4D    | ABHD10                                           | WDR52            | ADPRH              | SRPRB    | MSL2      | SLC25A36  |                   | GRK7     |
| UBQLN4P1                       |          | ABCC5                                            | ABCF3            | ALG3               | PSMD2    | MUC4      | LRCH3     | ZNF141            | MYL5     |
| MRFAP1L1                       |          | YIPF7                                            | CLOCK            | COX18              | BRIP1    | GTF2H2C   | ARSB      | SERINC5           | ZCCHC9   |
| WDR36                          | PHAX     | CDKN2AIPNL                                       |                  | SFXN1              | C5orf25  | SSR1      | MAK       | PFDN6             | DAXX     |
| SYNGAP1                        | ZBTB9    | TAF8                                             | RPL7L1           | DLK2               | AARS2    | TDRD6     | MCM3      | VTA1              | RSPH3    |
| C7orf26                        | MIOS     | CDK13                                            | URGCP            | PSPH               | SBDSP1   | BAZ1B     | ZKSCAN5   | ZKSCAN1           | TAF6     |
| CNPY4                          | SLC12A9  | METTL2A                                          | TNPO3            | SMO                | NFE2L1   | C7orf49   | ZNF398    | ZNF862            | LONRF1   |
| CHMP7                          | EXTL3    | INTS9                                            | TTI2             | ARMC1              | DERL1    | LRRC6     | ZNF623    | SNAPC3            | KLHL9    |
| FAM122A                        | FXN      | C9orf40                                          | CEP78            | FOXE1              | RNF20    | TRIM32    | PSMD5     | ZBTB43            | TRUB2    |
| TBC1D13                        | CCBL1    | TOR1B                                            | EXOSC2           | BRD3               | NACC2    | C9orf69   | QSOX2     | SDCCAG3           | NUDT5    |
| ZNF485                         | ZFAND4   | ERCC6                                            | CSTF2T           | MSS51              | AP3M1    | POLR3A    | IDE       | MYOF              | ENTPD7   |
| TAF5                           | SMC3     | FAM175B                                          | CTR9             | CAPRIN1            | TTC9C    | ZBTB3     | MARK2     | PLCB3             | GPR137   |
| RPS6KA4                        | MEN1     | CPT1A                                            | UCP3             | C11orf30           |          | FAM76B    | DLAT      | ZW10              | PAFAH1B2 |
| DDX6                           | DPAGT1   | RNF26                                            | ZNF202           | HYLS1              | APPL2    | VPS26B    | RAD52     | NCAPD2            | KIAA1467 |
| REP15                          | BCDIN3D  | MFSD5                                            | SMUG1            | PDE1B              | ZC3H10   | OBFC2B    | TIMELESS  |                   | KIF5A    |
| TMEM19                         | TMPO     | TRPV4                                            | TCHP             | ANAPC7             | VPS29    | ATXN2     | RNF34     | ORAI1             | C12orf65 |
| SBNO1                          | SNRNP35  | BRI3BP                                           | GOLGA3           | KRR1P1             | PDS5B    | PROSER1   | KBTBD6    | KBTBD7            | NAA16    |
| ITM2B                          | BORA     | TTC5                                             | MRPL52           | ACIN1              | SYNJ2BP  | PROX2     | NEK9      | POMT2             | CPSF2    |
| BTBD7                          | GOLGA8B  | ZFYVE19                                          | LCMT2            | TUBGCP4            | DUOX1    | AP4E1     | RNF111    | PARP16            | DIS3L    |
| PIAS1                          | CALML4   | ANP32A                                           | HEXA             | MPI                | ZSCAN2   | ZNF774    | NR2F2     | ALDH1A3           | GLYR1    |
| ERCC4                          | C16orf88 |                                                  | UBFD1            | MAZ                | TAOK2    | GDPD3     | TBC1D10B  |                   | CNEP1R1  |
| HEATR3                         | CIAPIN1  | GOT2                                             | E2F4             | CTCF               | TMEM170A |           | VN2R10P   | MLYCD             | USP10    |
| GALNS                          | CENPBD1  | VPS53                                            | ANKFY1           | ZFP3               | DHX33    | SLC16A13  |           | GPS2              | WRAP53   |
| KRBA2                          | USP32P2  | C17orf51                                         |                  | SPAG5-AS1          |          | KIAA0100  |           | CRLF3             | TEFM     |
| PEX12                          | DHRS11   | PIP4K2B                                          | MED1             | LEPREL4            | CNP      | FAM134C   | PSME3     | RUNDC1            | ZNF652   |

Stable4\_20PerPair

| GO:0042110 | Pvalue               | OddsRatio | ExpCount         | Count             | Size              | Term                                                               |
|------------|----------------------|-----------|------------------|-------------------|-------------------|--------------------------------------------------------------------|
| 19         | 7.91799160308697e-19 |           | 27.0586868686869 |                   | 1.14787903951284  | T cell activation                                                  |
| 20         | 1.14899298458457e-17 |           | 21.1652542372881 |                   | 1.55809286554564  | lymphocyte activation                                              |
| 15         | 9.87449168117062e-16 |           | 27.9316452374705 |                   | 0.795239083800429 | regulation of T cell activation                                    |
| 13         | 2.39477060932062e-14 |           | 30.0443037974684 |                   | 0.615320739049201 | positive regulation of T cell activation                           |
| 15         | 3.86222033178807e-14 |           | 21.3760588947156 |                   | 1.01833783129195  | regulation of lymphocyte activation                                |
| 14         | 5.57899666146866e-14 |           | 23.8548425859168 |                   | 0.838419486540724 | positive regulation of leukocyte activation                        |
| 14         | 8.3966696993133e-14  |           | 23.1045645086167 |                   | 0.863608054805896 | positive regulation of cell activation                             |
| 15         | 2.43773151427523e-13 |           | 18.6711711711712 |                   | 1.15507577330289  | regulation of leukocyte activation                                 |
| 13         | 4.6343104045604e-13  |           | 23.4273927392739 |                   | 0.773648882430282 | positive regulation of lymphocyte activation                       |
| 343        | 6.37990227168931e-13 |           | 17.391644693474  | 1.23423984499343  | 15                | regulation of cell activation                                      |
| 11         | 1.15672041073631e-12 |           | 31.3968412634946 |                   | 0.478582797038267 | immune response-activating cell surface receptor signaling pathway |
| 10         | 1.78391606113461e-12 |           | 38.2825040128411 |                   | 0.356238322607432 | T cell receptor signaling pathway                                  |
| 11         | 2.7847198420019e-12  |           | 28.7779204107831 |                   | 0.518164832883537 | immune response-regulating cell surface receptor signaling pathway |
| 204        | 5.69787603438948e-12 |           | 22.1984375       | 0.734066846585011 | 12                | lymphocyte differentiation                                         |
| 11         | 6.71253741383032e-12 |           | 26.3740958788898 |                   | 0.561345235623832 | T cell differentiation                                             |
| 10         | 1.61161905646764e-11 |           | 30.1011378002528 |                   | 0.442599128088022 | antigen receptor-mediated signaling pathway                        |
| 364        | 3.46996677047776e-10 |           | 13.340930674264  | 1.30980554978894  | 13                | positive regulation of immune response                             |
| 12         | 5.45838406235542e-10 |           | 14.5955172413793 |                   | 1.08670680229742  | leukocyte differentiation                                          |
| 11         | 5.59221983302669e-10 |           | 16.9778963414634 |                   | 0.845616220330773 | immune response-activating signal transduction                     |
| 11         | 7.30755948021455e-10 |           | 16.5279957582185 |                   | 0.86720642170092  | leukocyte migration                                                |



Stable4\_20PerPair

|                |                                                                     |                                    |                     |
|----------------|---------------------------------------------------------------------|------------------------------------|---------------------|
| GO:0002764     | 9.89526932126761e-10                                                | 16.0319028506741                   | 0.892394989966092   |
| 11 248         | immune response-regulating signaling pathway                        |                                    |                     |
| GO:0030097     | 6.43672619411107e-09                                                | 10.3325925925926                   | 1.66604387239637    |
| 13 463         | hemopoiesis                                                         |                                    |                     |
| GO:0002253     | 7.03563355743526e-09                                                | 13.1454098915989                   | 1.07591170161235    |
| 11 299         | activation of immune response                                       |                                    |                     |
| GO:0031294     | 8.45751436674455e-09                                                | 32.7833333333333                   | 0.269877517126842   |
| 7 75           | lymphocyte costimulation                                            |                                    |                     |
| GO:0031295     | 8.45751436674455e-09                                                | 32.7833333333333                   | 0.269877517126842   |
| 7 75           | T cell costimulation                                                |                                    |                     |
| GO:0048534     | 1.42906661055106e-08                                                | 9.62448132780083                   | 1.78119161303716    |
| 13 495         | hemopoietic or lymphoid organ development                           |                                    |                     |
| GO:0045580     | 1.58926020043176e-08                                                | 29.709037037037                    | 0.295066085392014 7 |
| 82             | regulation of T cell differentiation                                |                                    |                     |
| GO:0045619     | 5.94068377160562e-08                                                | 24.1905797101449                   | 0.356238322607432   |
| 7 99           | regulation of lymphocyte differentiation                            |                                    |                     |
| GO:0033077     | 7.69733822378621e-08                                                | 34.0173913043478                   | 0.219500380596499   |
| 6 61           | T cell differentiation in thymus                                    |                                    |                     |
| GO:0045061     | 3.42675928321822e-07                                                | 92.2179487179487                   | 0.0611722372154176  |
| 4 17           | thymic T cell selection                                             |                                    |                     |
| GO:0045582     | 1.2475444866316e-06                                                 | 31.8062943262411                   | 0.190713445436302   |
| 5 53           | positive regulation of T cell differentiation                       |                                    |                     |
| GO:0045058     | 1.50173135517509e-06                                                | 59.9125 0.0863608054805896         | 4 24                |
|                | T cell selection                                                    |                                    |                     |
| GO:0045621     | 2.74531788601454e-06                                                | 26.7674505412467                   | 0.223098747491523   |
| 5 62           | positive regulation of lymphocyte differentiation                   |                                    |                     |
| GO:0071350     | 3.63567199059503e-06                                                | 146.867346938776                   | 0.0323853020552211  |
| 3 9            | cellular response to interleukin-15                                 |                                    |                     |
| GO:0002252     | 8.39595002105175e-06                                                | 7.78471408303004                   | 1.38896962147948    |
| 9 386          | immune effector process                                             |                                    |                     |
| GO:0070672     | 9.4495803812895e-06                                                 | 97.891156462585 0.0431804027402948 | 3                   |
| 12             | response to interleukin-15                                          |                                    |                     |
|                | Tissue: Artery_Tibial=>Thyroid Type: asymmetric                     |                                    |                     |
|                | SourceGene: RP11-398A8.3(ENSG00000241163.1)                         |                                    |                     |
| TargetGeneSet: | RP1 RPL22 RPL11 RP4 GAPDHP32 RPS27 Clorf100                         |                                    |                     |
| THPO LRPPRC    | PPM1B FAM161A RPL32 RPL15 RP11 HGD ABCC5 RPL35A                     |                                    |                     |
| RPL34 LPCAT1   | BTF3 NSA2 PCDHGB8P RPS14 OR2B6 RPL10A ZNF117                        |                                    |                     |
| RPL30 POLR1E   | C9orf153 RPL35 RPL27A EIF3M RPS25 PHB2 RPL18AP3                     |                                    |                     |
| GPN3 MLEC      | WDR90 NUDT21 NOL3 KLHDC4 DVL2 ADORA2B RPL17 RPL19                   |                                    |                     |
| RPL27 MRPL10   | UTP18 XAB2 ANO8 RPL18A SNRPD2 GLTSCR2 RPL18 SLC6A16                 |                                    |                     |
| RPL13A RPS11   | OTOR U6 ZNFX1-AS1 PMEPA1 EIF3D RPL3 EFCAB6                          |                                    |                     |
| SSX2B LAS1L    |                                                                     |                                    |                     |
| GOBPID         | Pvalue OddsRatio ExpCount Count Size Term                           |                                    |                     |
| GO:0006415     | 2.24254460945105e-33                                                | 130.245454545455                   | 0.340045671579821   |
| 21 91          | translational termination                                           |                                    |                     |
| GO:0006413     | 4.68572913134875e-32                                                | 82.0615153788447                   | 0.567988374506954   |
| 23 152         | translational initiation                                            |                                    |                     |
| GO:0006414     | 6.28665788110763e-32                                                | 108.431818181818                   | 0.392360390284409   |
| 21 105         | translational elongation                                            |                                    |                     |
| GO:0006614     | 6.28665788110763e-32                                                | 108.431818181818                   | 0.392360390284409   |
| 21 105         | SRP-dependent cotranslational protein targeting to membrane         |                                    |                     |
| GO:0006613     | 7.82262904892689e-32                                                | 107.148663101604                   | 0.396097155906166   |
| 21 106         | cotranslational protein targeting to membrane                       |                                    |                     |
| GO:0045047     | 7.82262904892689e-32                                                | 107.148663101604                   | 0.396097155906166   |
| 21 106         | protein targeting to ER                                             |                                    |                     |
| GO:0072599     | 7.82262904892689e-32                                                | 107.148663101604                   | 0.396097155906166   |
| 21 106         | establishment of protein localization to endoplasmic reticulum      |                                    |                     |
| GO:0070972     | 9.11874317632008e-31                                                | 93.8144329896907                   | 0.440938343367241   |
| 21 118         | protein localization to endoplasmic reticulum                       |                                    |                     |
| GO:0000184     | 1.10484427653315e-30                                                | 92.8506493506493                   | 0.444675108988997   |
| 21 119         | nuclear-transcribed mRNA catabolic process, nonsense-mediated decay |                                    |                     |
| GO:0019080     | 2.32300005459506e-28                                                | 69.8384615384615                   | 0.564251608885198   |
| 21 151         | viral genome expression                                             |                                    |                     |

Stable4\_20PerPair

|            |                      |                                                    |                   |
|------------|----------------------|----------------------------------------------------|-------------------|
| GO:0019083 | 2.32300005459506e-28 | 69.8384615384615                                   | 0.564251608885198 |
| 21         | 151                  | viral transcription                                |                   |
| GO:0006612 | 3.110465836935e-28   | 68.7706611570248                                   | 0.571725140128711 |
| 21         | 153                  | protein targeting to membrane                      |                   |
| GO:0043624 | 3.110465836935e-28   | 68.7706611570248                                   | 0.571725140128711 |
| 21         | 153                  | cellular protein complex disassembly               |                   |
| GO:0043241 | 6.33905511835966e-28 | 66.2375580623756                                   | 0.590408968237492 |
| 21         | 158                  | protein complex disassembly                        |                   |
| GO:0000956 | 2.79484968933089e-27 | 61.267199017199                                    | 0.631513390076811 |
| 169        |                      | nuclear-transcribed mRNA catabolic process         | 21                |
| GO:0034623 | 5.30088093437068e-27 | 59.2442067736185                                   | 0.650197218185593 |
| 21         | 174                  | cellular macromolecular complex disassembly        |                   |
| GO:0006402 | 8.7213255440415e-27  | 57.7185871453387                                   | 0.665144280672618 |
| 21         | 178                  | mRNA catabolic process                             |                   |
| GO:0032984 | 9.85870964498321e-27 | 57.349252013809                                    | 0.668881046294374 |
| 179        |                      | macromolecular complex disassembly                 | 21                |
| GO:0072594 | 1.69617848285117e-25 | 49.4277198211624                                   | 0.762300186838281 |
| 21         | 204                  | establishment of protein localization to organelle |                   |
| GO:0006401 | 1.88559175218445e-25 | 49.1556324110672                                   | 0.766036952460037 |
| 21         | 205                  | RNA catabolic process                              |                   |
| GO:0019058 | 2.47146800524597e-24 | 42.9909090909091                                   | 0.863192858625701 |
| 21         | 231                  | viral infectious cycle                             |                   |
| GO:0022415 | 3.09241419212308e-23 | 37.6972232788132                                   | 0.971559061656633 |
| 21         | 260                  | viral reproductive process                         |                   |
| GO:0071845 | 2.01202174463804e-22 | 34.1991012789492                                   | 1.06124143657878  |
| 21         | 284                  | cellular component disassembly at cellular level   |                   |
| GO:0022411 | 2.70405805785441e-22 | 33.6772216547497                                   | 1.07618849906581  |
| 21         | 288                  | cellular component disassembly                     |                   |
| GO:0016032 | 3.04439881613852e-18 | 20.669978858351                                    | 1.68528129541208  |
| 451        |                      | viral reproduction                                 | 21                |
| GO:0033365 | 8.05583481382574e-18 | 19.6329444891392                                   | 1.76749013909072  |
| 21         | 473                  | protein localization to organelle                  |                   |
| GO:0006605 | 8.41035788686445e-18 | 19.5881998795906                                   | 1.77122690471248  |
| 21         | 474                  | protein targeting                                  |                   |
| GO:0022613 | 5.42881346003134e-10 | 16.9542490762878                                   | 0.840772264895163 |
| 11         | 225                  | ribonucleoprotein complex biogenesis               |                   |
| GO:0071843 | 1.02968832075048e-09 | 15.8974908200734                                   | 0.893086983599751 |
| 11         | 239                  | cellular component biogenesis at cellular level    |                   |
| GO:0042254 | 7.36950037898148e-08 | 17.5837187789084                                   | 0.556778077641686 |
| 8          | 149                  | ribosome biogenesis                                |                   |
| GO:0006364 | 2.34516328586075e-06 | 18.2385204081633                                   | 0.388623624662653 |
| 6          | 104                  | rRNA processing                                    |                   |
| GO:0016072 | 3.2541389883178e-06  | 17.1790865384615                                   | 0.411044218393191 |
| 6          | 110                  | rRNA metabolic process                             |                   |

Tissue: Artery\_Tibial=>Thyroid Type: asymmetric

SourceGene: RP11-469M7.1(ENSG00000260006.1)

|                |           |            |          |          |              |          |         |          |          |
|----------------|-----------|------------|----------|----------|--------------|----------|---------|----------|----------|
| TargetGeneSet: | UBE2J2    | RP4        | TTC34    | CEP104   | DFFB         | RP13     | THAP3   | ERRFI1   | LZIC     |
| RP11           | DFFA      | PLOD1      | DNAJC16  | ARHGEF19 | ARHGEF19-AS1 | CROCCP3  | ATP13A2 |          |          |
| HP1BP3         | TCEB3     | LDLRAP1    | SH3BGRL3 | XKR8     | EYA3         | MED18    | RCC1    | PRDX3P2  |          |
| SNRNP40        | TXLNA     | FAM167B    | HDAC1    | ZMYM1    | NCDN         | C1orf216 | LSM10   | ZMPSTE24 |          |
| SLFNL1         | RNF220    | MMACHC     | ATRX     | STIL     | C1orf123     | TTC22    | OMA1    | MYSM1    |          |
| ATG4C          | ALG6      | GADD45A    | HHLA3    | SYDE2    | CCBL2        | FRRS1    | PSMA5   | ATXN7L2  | CYB561D1 |
| CEPT1          | GDAP2     | GAPDHP32   |          | LIX1L    | GNRHR2       | BOLA1    | TARS2   | GOLPH3L  | ARNT     |
| GABPB1         | LYSMD1    | SNX27      | INTS3    | DENND4B  | PYG02        | FLAD1    | FAM189B | UBQLN4   | BGLAP    |
| C1orf182       |           | ARHGEF11   |          | USP21    | HSD17B7      | POGK     | METT13  | PIGC     | CACYBP   |
| MRPS14         | SMG7      | TRMT1L     | PTGS2    | C1orf98  | KLHL12       | BTG2     | TMEM81  | TMCC2    | CD46     |
| INTS7          | MARCL1    | TP53BP2    | PARP1    | LBR      | COG2         | C1orf131 | TOMM20  | MTR      | ADSS     |
| HSD17B7P1      |           | PGBD2      | SMC6     | TTC32    | UBXN2A       | DNMT3A   | RAB10   | PREB     | SLC5A6   |
| CCDC121        | SUPT7L    | EHD3       | SLC30A6  | FAM98A   | GEMIN6       | ARHGEF33 |         | PLEKHH2  | PAPOLG   |
| FAM161A        | PCBP1-AS1 |            | SPR      | CCT7     | AUP1         | ART4     | MRPL15  | GGCX     | C2orf68  |
| MRPL35         | RMND5A    | PLGLB1     | MRPS5    | ZNF2     | LMAN2L       | TBC1D8   | C2orf29 | GPR45    | POLR1B   |
| FOXD4L1        | STEAP3    | STEAP3-AS1 |          | TMEM37   | LY75         |          | C2orf77 | HSPD1    | SATB2    |
| CASP10         | ICAILL    | WDR12      | KLF7-IT1 |          | CREB1        | IDH1     | ATIC    | RQCD1    | BCS1L    |

Stable4\_20PerPair

|           |            |            |            |           |              |           |           |           |              |
|-----------|------------|------------|------------|-----------|--------------|-----------|-----------|-----------|--------------|
| TLL4      | NHEJ1      | COL4A3     | EIF4E2     | RNPEPL1   | DTYMK        | TLL3      | CRELD1    | CHCHD4    | C3orf19      |
| METTL6    | GORASP1    | ZNF619     | ZNF620     | C3orf23   | CTD          | NME6      | PLXNB1    | NPRL2     | HEMK1        |
| DUSP7     | PHF7       | SCT        | FLNB-AS1   |           | SHQ1         | ARL4D     | ABHD10    | WDR52     | KIAA1407     |
| TIMMDC1   | GTF2E1     | PTPLB      | SEC61A1    | CDV3      | SRPRB        | MSL2      | SLC25A36  |           | ZBTB38 GRK7  |
| GK5       | TRPC1      | UBQLN4P1   |            | SIAH2     | MLF1         | SERPINI2  |           | WDR49     | ACTL6A       |
| DCUN1D1   | PARL       | ABCC5      | ABCF3      | ALG3      | POLR2H       | EPHB3     | CRYGS     | TBCCD1    | DNAJB11 RFC4 |
| U2        | CEP19      | LRCH3      | ZNF732     | ZNF141    | MYL5         | DGKQ      | CTBP1     | TMEM128   | ZNF518B      |
| NFXL1     | CLOCK      | COX18      | ANKRD17    | CXCL2     | CXCL11       | FAM47E    | THAP9     | CASP6     | CCNA2        |
| KIAA1109  |            | ANKRD50    | IL15       | TIGD4     | MFAP3L       | IRF2      | EXOC3     | LPCAT1    | BRIP1        |
| MARCH6    | FAM105B    | C5orf51    | SNX18      | GPX8      | SLC38A9      | IPO11     | PTCD2     | ARSB      | FAM151B      |
| ZCCHC9    | FAM81B     | FAM174A    | PIIP5K2    | WDR36     | EPB41L4A-AS1 |           | APC       | XBP1P1    | PHAX         |
| P4HA2-AS1 |            | P4HA2      | SHROOM1    | C5orf65   | IGIP         | CTB       | HARS2     | DIAPH1    | SH3RF2       |
| HMGXB3    | IRGM       | MED7       | TSPAN17    | TRIM52    | RP1          | PXDC1     | C6orf228  |           | HIST1H2AC    |
| HIST1H2BD |            | HIST1H1PS1 |            | HIST1H3E  |              | HIST1H2BH |           | HIST1H3J  |              |
| OR2B6     | SCAND3     | TRIM27     | PPP1R11    | GNL1      | DDR1         | CSNK2B    | C6orf25   | HSPA1L    | PFDN6        |
| SYNGAP1   | ZBTB9      | NUDT3      | PPIL1      | TAF8      | CNPY3        | AARS2     | BAG2      | LINC00472 |              |
| MB21D1    | MTO1       | UBE2J1     | PREP       |           | C6orf203     | TRMT11    | PEX7      | VIP       | SERAC1       |
| MRPL18    | SUN1       | RNF216P1   |            |           | C7orf26      | MIOS      | C7orf46   | CDK13     | URGCP        |
| VOPP1     | PSPH       | ZNF117     | SBDS       | SLDSP1    | BAZ1B        | CLIP2     | STEAP4    | RBM48     | PPP1R9A      |
| ZKSCAN5   | FAM200A    | ZKSCAN1    | CNPY4      | SLC12A9   | PLOD3        | CLDN15    | C7orf53   | CAV2      | CADPS2 GCC1  |
| IMPDH1    | METTL2A    | TNPO3      | SMO        | TRPV6     | ZNF786       | ZNF398    | ZNF862    | GIMAP4    | CDK5         |
| ABCF2     | SMARCD3    | CTA        | FDFT1      | LONRF1    | FAM160B2     |           | CHMP7     | PPP2R2A   | EXTL3        |
| INTS9     | HMBOX1     | FUT10      | TTI2       | C8orf40   | CYP7A1       | YTHDF3    | ARMC1     | GDAP1     | INTS8        |
| GAPDHP62  |            | GRHL2      | ENY2       | DERL1     | WDR67        | ZHX1      | LRRC6     | ZFAT      | C8orf73      |
| ZNF623    | NRBP2      | ZNF252     | CBWD1      | RANBP6    | SNAPC3       | KLHL9     | C9orf11   | DNAJA1    | VCP          |
| HMGXB3P24 |            | DCAF10     | FXN        | SMC5      | C9orf40      | CEP78     | C9orf103  |           | LINC00476    |
| FOXEL1    | NANS       | ALG2       | RNF20      | NIPSNAP3B |              | TRIM32    | TBC1D13   | CCBL1     | DOLPP1       |
| TOR1B     | EXOSC2     | SURF4      | C9orf69    | SDCCAG3   | FAM69B       | MAMDC4    | C9orf142  |           | SSNA1        |
| TUBB4B    | NOXA1      | KLF6       | FBXO18     | NUDT5     | CDNF         | BMI1      | LINC00202 |           | ZNF485       |
| ZFAND4    | ERCC6      | CSTF2T     | ADO        | PBLD      | DNA2         | P4HA1     | MSS51     | CHCHD1    | AP3M1        |
| MINPP1    | BTAF1      | IDE        | MYOF       | FRAT1     | LINC00263    |           | BTRC      | TMEM180   | SUFU TAF5    |
| ZDHHC6    | METTL10    | FAM175B    | CTAGE7P    | STK32C    | CYP2E1       | AP2A2     | IFITM10   | ZNF195    | CHRNA10      |
| UBQLNL    | TRIM34     | TRIM5      | RRP8       | MRPL17    | RIC3         | ZNF143    | TPH1      | MPPED2    | SLC35C1 ETFA |
| CELF1     | B3GAT3     | TTC9C      | ZBTB3      | C11orf84  |              | MARK2     | STIP1     | FKBP2     | PLCB3        |
| GPR137    | RPS6KA4    | MEN1       | PPP2R5B    | GPHA2     | SAC3D1       | EFEMP2    | RBM14     | 7SK       | SUV420H1     |
| KRTAP5-9  |            | FOLR3      | CLPB       | MRPL48    | UCP3         | C11orf30  |           | SLC36A4   | FAM76B       |
| MSANTD4   | RDX        | C11orf93   |            | TIMM8B    | ZW10         | USP28     | RNF214    | SETP16    | H2AFX        |
| DPAGT1    | C2CD2L     | CBL        | HSPA8      | ZNF202    | STT3A        | HYLS1     | APPL2     | VPS26B    | RAD52        |
| FKBP4     | NCAPD2     | RPL13AP20  |            | KIAA1467  |              | REP15     | PUS7L     | ENDOU     | BCDIN3D      |
| TARBP2    | SMUG1      | SUOX       | ZC3H10     | TIMELESS  |              | ZBTB39    | TMEM194A  |           | TBC1D30      |
| LEMD3     | DYRK2      | TMEM19     | CSRP2      | TMPO      | CKAP4        | POLR3B    | FICD      | C12orf34  |              |
| ANAPC7    | VPS29      | DYNLL1     | POP5       | MLEC      | RNF34        | C12orf65  |           | SBNO1     | SNRNP35 UBC  |
| BRI3BP    | SFSWAP     | PUS1       | GOLGA3     | RPL23AP67 |              | ZMYM5     | KRR1P1    | LNX2      | PDS5B        |
| NHLRC3    | KBTBD6     | KBTBD7     | NAA16      | ITM2B     | DLEU1        | RPS4XP16  |           | DHRS12    | SUGT1 BORA   |
| LMO7      | DNAJC3-AS1 | DNAJC3     |            | UGGT2     | RAP2A        | PROZ      | PCID2     | TTC5      | PARP2 DAD1   |
| MRPL52    | ACIN1      | SFTA3      | MGAT2      | DNAAF2    | NEMF         | TXNDC16   | GNPNAT1   | HNRPCP    | SYNJ2BP      |
| MAP3K9    | RBM25      | ZNF410     | PROX2      | NEK9      | POMT2        | AHSA1     | SPTLC2    | RPS6KA5   | CPSF2        |
| BTBD7     | PAPOLA     | RPS20P33   |            | GOLGA8B   | ZFYVE19      | PPP1R14D  |           | RPAP1     | ZFP106       |
| TP53BP1   | PATL2      | B2M        | MYEF2      | HDC       | AP4E1        | PIGB      | RNF111    | NARG2     | CSNK1G1      |
| PARP16    | DIS3L      | SMAD6      | FEM1B      | ANP32A    | HEXA         | CSK       | SCAMP2    | GOLGA6L5  |              |
| ZSCAN2    | CHD2       | NR2F2      | LRRC28     | ASB7      | ALDH1A3      | SOLH      | FBXL16    | CCDC154   | MRPS34       |
| NTHL1     | ZNF205     | ATF7IP2    | ERCC4      | UBFD1     | PLK1         | MAZ       | TAOK2     | TBX6      | GDPD3        |
| SULT1A3   | TBC1D10B   |            | FBXL19-AS1 |           | FBXL19       | CNEP1R1   | HEATR3    | PAPD5     | SALL1        |
| CCL22     | DOK4       | EXOC3L1    | CTCF       | DDX19B    | TMEM170A     |           | C16orf46  |           | MLYCD        |
| ZC3H18    | CENPBD1    | VPS53      | RAP1GAP2   |           | ZMYND15      | RNF167    | ZFP3      | DERL2     | PITPNM3      |
| SLC16A13  |            | WRAP53     | KRBA2      | COX10-AS1 |              | ZSWIM7    | ALKBH5    | LLGL1     | C17orf51     |
| WSB1      | C17orf108  |            | SUPT6H     | ABHD15    | BLMH         | CRLF3     | RNF135    | CCT6B     | ZNF830       |
| PEX12     | DHRS11     | PIP4K2B    | LEPREL4    | ACLY      | KAT2A        | FAM134C   | RUNDC1    | UBTF      | C17orf69     |
| ZNF652    | DLX4       | PPP1R9B    | RSAD1      | C17orf67  |              | TRIM25    | RAD51C    | HEATR6    | APPBP2       |
| DCAF7     | CEP95      | HN1        | GGA3       | UNK       | TRIM65       | QRICH2    | ENGASE    | CBX2      | CBX8         |
| SIRT7     | PYCR1      | LRRC45     | RNMT       | RIOK3     | ZNF397       | MOCOS     | CCDC11    | ONECUT2   | BCL2         |
| ZADH2     | MIER2      | C19orf21   |            | CIRBP     | MOB3A        | DOT1L     | LMNB2     | ZNF555    | TLE6         |
| PIAS4     | ZBTB7A     | DPP9       | SAFB       | CAPS      | ELAVL1       | ZNF558    | ZNF562    | PIN1      | ICAM1        |

Stable4\_20PerPair

| ZGLP1                          | RAB3D                           | ZNF627     | ZNF440        | ZNF433    | ZNF844       | ZNF442   | ZNF799   | ZNF490    | WDR83    | LYL1 |  |
|--------------------------------|---------------------------------|------------|---------------|-----------|--------------|----------|----------|-----------|----------|------|--|
| STX10                          | SAMD1                           | SIN3B      | NR2F6         | ANO8      | TMEM221      | GLT25D1  | PIK3R2   | JUND      | ZNF253   |      |  |
| ZNF91                          | ANKRD27                         | NUDT19     | KCTD15        | ZNF792    | LIN37        | CAPNS1   | ZNF565   | ZNF529    | ZNF790   |      |  |
| ZNF781                         | MED29                           | ZFP36      | ZNF546        | MAP3K10   | SHKBP1       | MIA      | SMG9     | ZNF283    | ZNF284   |      |  |
| GEMIN7                         | BLOC1S3                         | FBXO46     | DMPK          | RSPH6A    | MYPOP        | KPTN     | CARD8    | FUT2      | PPP1R15A |      |  |
| BAX                            | SLC6A16                         | PTOV1      | NAPSA         | C19orf63  |              | CTU1     | ZNF615   | ZNF808    | ZNF816   |      |  |
| ZNF347                         | ZNF761                          | U2AF2      | ZNF835        | ZNF264    | ZNF543       | ZNF547   | ZNF749   | ZNF549    | ZNF586   |      |  |
| ZNF814                         | ZNF329                          | ZSCAN22    | ZNF132        | ZCCHC3    | FAM110A      | NOP56    | FASTKD5  | PCNA      | MKKS     | GZF1 |  |
| ABHD12                         | NANP                            | COMMD7     | DNMT3B        | PXMP4     | ZNF341       | MMP24    | NFS1     | NDRG3     | RBL1     |      |  |
| IFT52                          | FITM2                           | ADA        | MATN4         | SDC4      | ZSWIM3       | ZSWIM1   | NCOA5    | ELMO2     | KRT18P4  |      |  |
| TMEM189                        | ADNP                            | ZFP64      | VAPB          | C20orf151 |              | TCFL5    | DPH3P1   | RGS19     | PCMTD2   |      |  |
| RBM11                          | RNGTTP1                         | TCP10L     | TMEM50B       | C2CD2     | SUMO3        | CECR5    | ZNF74    | KRT18P5   | CRKL     |      |  |
| UBE2L3                         | SDF2L1                          | ZNF280B    | ZNF70         | ASPHD2    | HPS4         | GAS2L1   | NF2      | CCDC157   | RNF215   |      |  |
| PRR14L                         | POLR2F                          | TNRC6B     | SGSM3         | XPNPEP3   | L3MBTL2      | EFCAB6   | RP6      | NCAPH2    | CPT1B    | ACR  |  |
| PPP2R3B-AS1                    | HDHD1                           | ARHGAP6    | TCEANC        | REPS2     | SCML1        | ZNF673   | ZNF41    | ZNF41     | ZNF81    |      |  |
| ZNF630                         | RBM3                            | KCND1      | PPP1R3F       | WNK3      | FAM123B      | FAM155B  | CXorf65  | ACRC      | DMRTC1   |      |  |
| PABPC5                         | BEX4                            | PGRMC1     | EEF1A1P30     | ZBTB33    | AIFM1        | ZNF449   | FHL1     | IDS       |          |      |  |
| NAA10                          | HCFC1                           | LAGE3      | UBL4A         | MT        |              |          |          |           |          |      |  |
| GOBPID                         | Pvalue                          | OddsRatio  | ExpCount      | Count     | Size         | Term     |          |           |          |      |  |
| Tissue: Artery_Tibial=>Thyroid |                                 |            | Type: cluster |           |              |          |          |           |          |      |  |
| SourceGene:                    | RP11-469M7.1(ENSG00000260006.1) |            |               |           |              |          |          |           |          |      |  |
| TargetGeneSet:                 | UBE2J2                          | RP4        | TTC34         | CEP104    | DFFB         | RP13     | THAP3    | ERRFI1    | LZIC     |      |  |
| RP11                           | DFFA                            | PLOD1      | DNAJC16       | ARHGEF19  | ARHGEF19-AS1 | CROCCP3  | ATP13A2  |           |          |      |  |
| HP1BP3                         | TCEB3                           | LDLRAP1    | SH3BGRL3      | XKR8      | EYA3         | MED18    | RCC1     | PRDX3P2   |          |      |  |
| SNRNP40                        | TXLNA                           | FAM167B    | HDAC1         | ZMYM1     | NCDN         | C1orf216 | LSM10    | ZMPSTE24  |          |      |  |
| SLFNL1                         | RNF220                          | MMACHC     | ATRX          | STIL      | C1orf123     |          | OMA1     | MYSM1     |          |      |  |
| ATG4C                          | ALG6                            | GADD45A    | HHLA3         | SYDE2     | CCBL2        | FRRS1    | PSMA5    | ATXN7L2   | CYB561D1 |      |  |
| CEPT1                          | GDAP2                           | GAPDHP32   | LIX1L         | GNRHR2    | BOLA1        | TARS2    | GOLPH3L  | ARNT      |          |      |  |
| GABPB1                         | LYSMD1                          | SNX27      | INTS3         | DENND4B   | PYG02        | FLAD1    | FAM189B  | UBQLN4    | BGLAP    | CCT3 |  |
| C1orf182                       | ARHGEF11                        | USP21      | HSD17B7       | POGK      | METTTL13     | PIGC     | CACYBP   |           |          |      |  |
| MRPS14                         | SMG7                            | TRMT1L     | PTGS2         | C1orf98   | KLHL12       | BTG2     | TMEM81   | TMCC2     | CD46     |      |  |
| INTS7                          | MARC1                           | PT53BP2    | PARP1         | LBR       | COG2         | C1orf131 | TOMM20   | MTR       | ADSS     |      |  |
| HSD17B7P1                      | PGBD2                           | SMC6       | TTC32         | UBXN2A    | DNMT3A       | RAB10    | PREB     | SLC5A6    |          |      |  |
| CCDC121                        | SUPT7L                          | EHD3       | SLC30A6       | FAM98A    | GEMIN6       | ARHGEF33 | PLEKHH2  | PAPOLG    | XPO1     |      |  |
| FAM161A                        | PCBP1-AS1                       | SPR        | CCT7          | AUP1      | ART4         | MRPL15   | GGCX     | C2orf68   |          |      |  |
| MRPL35                         | RMND5A                          | PLGLB1     | MRPS5         | ZNF2      | LMAN2L       | TBC1D8   | C2orf29  | GPR45     | POLR1B   |      |  |
| FOXD4L1                        | STEAP3                          | STEAP3-AS1 | TMEM37        | LY75      | BBS5         | C2orf77  | HSPD1    | SATB2     |          |      |  |
| CASP10                         | ICA1L                           | WDR12      | KLF7-IT1      | CREB1     | IDH1         | ATIC     | RQCD1    | BCS1L     |          |      |  |
| TTLL4                          | NHEJ1                           | COL4A3     | EIF4E2        | RNPEPL1   | DTYMK        | TTLL3    | CRELD1   | CHCHD4    | C3orf19  |      |  |
| METTTL6                        | GORASP1                         | ZNF619     | ZNF620        | C3orf23   | CTD          | NME6     | PLXNB1   | NPRL2     | HEMK1    |      |  |
| DUSP7                          | PHF7                            | SCT        | FLNB-AS1      | SHQ1      | ARL4D        | ABHD10   | WDR52    | KIAA1407  |          |      |  |
| TIMMDC1                        | GTF2E1                          | PTPLB      | SEC61A1       | CDV3      | SRPRB        | MSL2     | SLC25A36 | ZBTB38    | GRK7     |      |  |
| GK5                            | TRPC1                           | UBQLN4P1   | SLC12A1       | SLC12A1   | SLC12A1      | SLC12A1  | SLC12A1  | SLC12A1   | SLC12A1  |      |  |
| DCUN1D1                        | PARL                            | ABCC5      | ABCF3         | ALG3      | POLR2H       | EPHB3    | CRYGS    | TBCCD1    | DNAJB11  | RFC4 |  |
| U2                             | CEP19                           | LRCH3      | ZNF732        | ZNF141    | MYL5         | DGKQ     | CTBP1    | TMEM128   | ZNF518B  |      |  |
| NFXL1                          | CLOCK                           | COX18      | ANKRD17       | CXCL2     | CXCL11       | FAM47E   | THAP9    | CASP6     | CCNA2    |      |  |
| KIAA1109                       |                                 | ANKRD50    | IL15          | TIGD4     | MFAP3L       | IRF2     | EXOC3    | LPCAT1    | BRIP1    |      |  |
| MARCH6                         | FAM105B                         | C5orf51    | SNX18         | GPX8      | SLC38A9      | IPO11    | PTCD2    | ARSB      | FAM151B  |      |  |
| ZCCHC9                         | FAM81B                          | FAM174A    | PIIP5K2       | WDR36     | EPB41L4A-AS1 | APC      | XBP1P1   | PHAX      |          |      |  |
| P4HA2-AS1                      |                                 | P4HA2      | SHROOM1       | C5orf65   | IGIP         | CTB      | HARS2    | DIAPH1    | SH3RF2   |      |  |
| HMGXB3                         | IRGM                            | MED7       | TSPAN17       | TRIM52    | RP1          | PXDC1    | C6orf228 | HIST1H2AC |          |      |  |
| HIST1H2BD                      |                                 | HIST1H1PS1 | HIST1H3E      | HIST1H3E  | HIST1H2BH    | HIST1H3J | HIST1H3J | HIST1H3J  | HIST1H3J |      |  |
| OR2B6                          | SCAND3                          | TRIM27     | PPP1R11       | GNL1      | DDR1         | CSNK2B   | C6orf25  | HSPA1L    | PFDN6    |      |  |
| SYNGAP1                        | ZBTB9                           | NUDT3      | PPIL1         | TAF8      | CNPY3        | AARS2    | BAG2     | LINC00472 |          |      |  |
| MB21D1                         | MTO1                            | UBE2J1     | PREP          | C6orf203  | TRMT11       | PEX7     | VIP      | SERAC1    |          |      |  |
| MRPL18                         | SUN1                            | RNF216P1   | C7orf26       | MIOS      | C7orf46      | CDK13    | URGCP    | CAMK2B    |          |      |  |
| VOPP1                          | PSPH                            | ZNF117     | SBDS          | SBDSP1    | BAZ1B        | CLIP2    | STEAP4   | RBM48     | PPP1R9A  |      |  |
| ZKSCAN5                        | FAM200A                         | ZKSCAN1    | CNPY4         | SLC12A9   | PLOD3        | CLDN15   | C7orf53  | CAV2      | CADPS2   | GCC1 |  |
| IMPDH1                         | METTTL2A                        | TNPO3      | SMO           | TRPV6     | ZNF786       | ZNF398   | ZNF862   | GIMAP4    | CDK5     |      |  |
| ABCF2                          | SMARCD3                         | CTA        | FDFT1         | LONRF1    | FAM160B2     | CHMP7    | PPP2R2A  | EXTL3     |          |      |  |
| INTS9                          | HMBOX1                          | FUT10      | TTI2          | C8orf40   | CYP7A1       | YTHDF3   | ARMC1    | ZFAT1     | INTS8    |      |  |
| GAPDHP62                       |                                 | GRHL2      | ENY2          | DERL1     | WDR67        | ZHX1     | LRRC6    | GDAP1     | C8orf73  |      |  |
| ZNF623                         | NRBP2                           | ZNF252     | CBWD1         | RANBP6    | SNAPC3       | KLHL9    | C9orf11  | DNAJA1    | VCP      |      |  |

Stable4\_20PerPair

| HMGB3P24       | DCAF10                          | FXN       | SMC5       | C9orf40    | CEP78      | C9orf103 | LINC00476 |          |          |      |
|----------------|---------------------------------|-----------|------------|------------|------------|----------|-----------|----------|----------|------|
| FOXE1          | NANS                            | ALG2      | RNF20      | NIPSNAP3B  | TRIM32     | TBC1D13  | CCBL1     | DOLPP1   |          |      |
| TOR1B          | EXOSC2                          | SURF4     | C9orf69    | SDCCAG3    | FAM69B     | MAMDC4   | C9orf142  | SSNA1    |          |      |
| TUBB4B         | NOXA1                           | KLF6      | FBXO18     | NUDT5      | CDNF       | BMI1     | LINC00202 | ZNF485   |          |      |
| ZFAND4         | ERCC6                           | CSTF2T    | ADO        | PBLD       | DNA2       | P4HA1    | MSS51     | CHCHD1   | AP3M1    |      |
| MINPP1         | BTAF1                           | IDE       | MYOF       | FRAT1      | LINC00263  |          | BTRC      | TMEM180  | SUFU     | TAF5 |
| ZDHHC6         | METTTL10                        | FAM175B   | CTAGE7P    | STK32C     | CYP2E1     | AP2A2    | IFITM10   | ZNF195   | CHRNA10  |      |
| UBQLNL         | TRIM34                          | TRIM5     | RRP8       | MRPL17     | RIC3       | ZNF143   | TPH1      | MPPED2   | SLC35C1  | ETFA |
| CELF1          | B3GAT3                          | TTC9C     | ZBTB3      | C11orf84   |            | MARK2    | STIP1     | FKBP2    | PLCB3    |      |
| GPR137         | RPS6KA4                         | MEN1      | PPP2R5B    | GPHA2      | SAC3D1     | EFEMP2   | RBM14     | 7SK      | SUV420H1 |      |
| KRTAP5-9       |                                 | FOLR3     | CLPB       | MRPL48     | UCP3       | C11orf30 |           | SLC36A4  | FAM76B   |      |
| MSANTD4        | RDX                             | C11orf93  |            | TIMM8B     | ZW10       | USP28    | RNF214    | SETP16   | H2AFX    |      |
| DPAGT1         | C2CD2L                          | CBL       | HSPA8      | ZNF202     | STT3A      | HYLS1    | APPL2     | VPS26B   | RAD52    |      |
| FKBP4          | NCAPD2                          | RPL13AP20 |            | KIAA1467   |            | REP15    | PUS7L     | ENDOU    | BCDIN3D  |      |
| TARBP2         | SMUG1                           | SUOX      | ZC3H10     | TIMELESS   |            | ZBTB39   | TMEM194A  |          | TBC1D30  |      |
| LEMD3          | DYRK2                           | TMEM19    | CSRP2      | TMPO       | CKAP4      | POLR3B   | FICD      | C12orf34 |          |      |
| ANAPC7         | VPS29                           | DYNLL1    | POP5       | MLEC       | RNF34      | C12orf65 |           | SBNO1    | SNRNP35  | UBC  |
| BRI3BP         | SFSWAP                          | PUS1      | GOLGA3     | RPL23AP67  |            | ZMYM5    | KRR1P1    | LNK2     | PDS5B    |      |
| NHLRC3         | KBTBD6                          | KBTBD7    | NAA16      | ITM2B      | DLEU1      | RPS4XP16 |           | DHRS12   | SUGT1    | BORA |
| LMO7           | DNAJC3-AS1                      | DNAJC3    | UGGT2      | RAP2A      |            | PROZ     | PCID2     | TTC5     | PARP2    | DAD1 |
| MRPL52         | ACIN1                           | SFTA3     | MGAT2      | DNAAF2     | NEMF       | TXNDC16  | GNPNAT1   | HNRPCP   | SYNJ2BP  |      |
| MAP3K9         | RBM25                           | ZNF410    | PROX2      | NEK9       | POMT2      | AHSA1    | SPTLC2    | RPS6KA5  | CPSF2    |      |
| BTBD7          | PAPOLA                          | RPS20P33  |            | GOLGA8B    | ZFYVE19    | PPP1R14D |           | RPAP1    | ZFP106   |      |
| TP53BP1        | PATL2                           | B2M       | MYEF2      | HDC        | AP4E1      | PIGB     | RNF111    | NARG2    | CSNK1G1  |      |
| PARP16         | DIS3L                           | SMAD6     | FEM1B      | ANP32A     | HEXA       | CSK      | SCAMP2    | GOLGA6L5 |          |      |
| ZSCAN2         | CHD2                            | NR2F2     | LRRC28     | ASB7       | ALDH1A3    | SOLH     | FBXL16    | CCDC154  | MRPS34   |      |
| NTHL1          | ZNF205                          | ATF7IP2   | ERCC4      | UBFD1      | PLK1       | MAZ      | TAOK2     | TBX6     | GDPD3    |      |
| SULT1A3        | TBC1D10B                        |           | FBXL19-AS1 | FBXL19     | FBXL19     | CNEP1R1  | HEATR3    | PAPD5    | SALL1    |      |
| CCL22          | DOK4                            | EXOC3L1   | CTCF       | DDX19B     | TMEM170A   |          | C16orf46  |          | MLYCD    |      |
| ZC3H18         | CENPBD1                         | VPS53     | RAP1GAP2   | ZMYND15    | RNF167     | ZFP3     | DERL2     |          | PITPNM3  |      |
| SLC16A13       |                                 | WRAP53    | KRBA2      | COX10-AS1  | ZSWIM7     | ALKBH5   | LLGL1     |          | C17orf51 |      |
| WSB1           | C17orf108                       | SUPT6H    | ABHD15     | BLMH       | CRLF3      | RNF135   | CCT6B     |          | ZNF830   |      |
| PEX12          | DHRS11                          | PIP4K2B   | LEPREL4    | ACLY       | KAT2A      | FAM134C  | RUNDC1    | UBTF     | C17orf69 |      |
| ZNF652         | DLX4                            | PPP1R9B   | RSAD1      | C17orf67   |            | TRIM25   | RAD51C    | HEATR6   | APPBP2   |      |
| DCAF7          | CEP95                           | HN1       | GGA3       | UNK        | TRIM65     | QRICH2   | ENGASE    | CBX2     | CBX8     |      |
| SIRT7          | PYCR1                           | LRRC45    | RNMT       | RIOK3      | ZNF397     | MOCOS    | CCDC11    | ONECUT2  | BCL2     |      |
| ZADH2          | MIER2                           | C19orf21  |            | CIRBP      | MOB3A      | DOT1L    | LMNB2     | ZNF555   | TLE6     |      |
| PIAS4          | ZBTB7A                          | DPP9      | SAFB       | CAPS       | ELAVL1     | ZNF558   | ZNF562    | PIN1     | ICAM1    |      |
| ZGLP1          | RAB3D                           | ZNF627    | ZNF440     | ZNF433     | ZNF844     | ZNF442   | ZNF799    | ZNF490   | WDR83    | LYL1 |
| STX10          | SAMD1                           | SIN3B     | NR2F6      | ANO8       | TMEM221    | GLT25D1  | PIK3R2    | JUND     | ZNF253   |      |
| ZNF91          | ANKRD27                         | NUDT19    | KCTD15     | ZNF792     | LIN37      | CAPNS1   | ZNF565    | ZNF529   | ZNF790   |      |
| ZNF781         | MED29                           | ZFP36     | ZNF546     | MAP3K10    | SHKBP1     | MIA      | SMG9      | ZNF283   | ZNF284   |      |
| GEMIN7         | BLOC1S3                         | FBXO46    | DMPK       | RSPH6A     | MYPOP      | KPTN     | CARD8     | FUT2     | PPP1R15A |      |
| BAX            | SLC6A16                         | PTOV1     | NAPSA      | C19orf63   |            | CTU1     | ZNF615    | ZNF808   | ZNF816   |      |
| ZNF347         | ZNF761                          | U2AF2     | ZNF835     | ZNF264     | ZNF543     | ZNF547   | ZNF749    | ZNF549   | ZNF586   |      |
| ZNF814         | ZNF329                          | ZSCAN22   | ZNF132     | ZCCHC3     | FAM110A    | NOP56    | FASTKD5   | PCNA     | MKKS     | GZF1 |
| ABHD12         | NANP                            | COMMD7    | DNMT3B     | PXMP4      | ZNF341     | MMP24    | NFS1      | NDRG3    | RBL1     |      |
| IFT52          | FITM2                           | ADA       | MATN4      | SDC4       | ZSWIM3     | ZSWIM1   | NCOA5     | ELMO2    | KRT18P4  |      |
| TMEM189        | ADNP                            | ZFP64     | VAPB       | C20orf151  |            | TCFL5    | DPH3P1    | RGS19    | PCMTD2   |      |
| RBM11          | RNGTTP1                         | TCP10L    | TMEM50B    | C2CD2      | SUMO3      | CECR5    | ZNF74     | KRT18P5  | CRKL     |      |
| UBE2L3         | SDF2L1                          | ZNF280B   | ZNF70      | ASPHD2     | HPS4       | GAS2L1   | NF2       | CCDC157  | RNF215   |      |
| PRR14L         | POLR2F                          | TNRC6B    | SGSM3      | XPNPEP3    | L3MBTL2    | EFCAB6   | RP6       | NCAPH2   | CPT1B    | ACR  |
| PPP2R3B-AS1    |                                 | HDHD1     | ARHGAP6    | TCEANC     | REPS2      | SCML1    | ZNF673    | ZNF41    | ZNF81    |      |
| ZNF630         | RBM3                            | KCND1     | PPP1R3F    | WNK3       | FAM123B    | FAM155B  | CXorf65   | ACRC     | DMRTC1   |      |
| PABPC5         | BEX4                            | PGRMC1    | EEF1A1P30  |            | ZBTB33     | AIFM1    | ZNF449    | FHL1     | IDS      |      |
| NAA10          | HCFC1                           | LAGE3     | UBL4A      | MT         |            |          |           |          |          |      |
| GOBPID         | Pvalue                          | OddsRatio |            | ExpCount   |            | Count    | Size      | Term     |          |      |
| Tissue:        | Artery_Tibial=>Thyroid          |           |            | Type:      | asymmetric |          |           |          |          |      |
| SourceGene:    | RP11-496I2.3(ENSG00000257898.1) |           |            |            |            |          |           |          |          |      |
| TargetGeneSet: | B3GALT6                         | RPL22     | PLEKHG5    | RP3        | RPL11      | RP4      | PABPC4    | YBX1     | RPS8     |      |
| RPL5           | RP11                            | TMEM167B  | RPS27      | LRRN2      | GALNT2     | TOMM20   | OR11L1    | RPS7     | UBC      |      |
| CCDC104        | INPP4A                          | RPL31     | FOXD4L1    | STEAP3-AS1 | RPL37A     | RPL32    | RPL15     | CCRL1    |          |      |
| EIF1B          | RPL14                           | LARS2     | SLC52A1    | RPL10AP6   | THOC7      | RPL24    | CNBP      | RPL35A   |          |      |

Stable4\_20PerPair

| GOBPID     | Pvalue               | OddsRatio                                                           | ExpCount         | Count             | Size | Term               |
|------------|----------------------|---------------------------------------------------------------------|------------------|-------------------|------|--------------------|
| GO:0006415 | 8.10773869219631e-57 |                                                                     | 123.329393043874 |                   |      | 0.761954190021452  |
| 38         | 91                   | translational termination                                           |                  |                   |      |                    |
| GO:0006414 | 7.0171850235729e-56  |                                                                     | 102.789356984479 |                   |      | 0.879177911563214  |
| 39         | 105                  | translational elongation                                            |                  |                   |      |                    |
| GO:0006413 | 8.52636321611516e-56 |                                                                     | 71.9246059750647 |                   |      | 1.27271469102484   |
| 43         | 152                  | translational initiation                                            |                  |                   |      |                    |
| GO:0006614 | 7.02328282744798e-54 |                                                                     | 97.463405862255  | 0.879177911563214 |      | 38                 |
| 105        |                      | SRP-dependent cotranslational protein targeting to membrane         |                  |                   |      |                    |
| GO:0006613 | 1.08863645954581e-53 |                                                                     | 96.0233876683203 |                   |      | 0.887551034530482  |
| 38         | 106                  | cotranslational protein targeting to membrane                       |                  |                   |      |                    |
| GO:0045047 | 1.08863645954581e-53 |                                                                     | 96.0233876683203 |                   |      | 0.887551034530482  |
| 38         | 106                  | protein targeting to ER                                             |                  |                   |      |                    |
| GO:0072599 | 1.08863645954581e-53 |                                                                     | 96.0233876683203 |                   |      | 0.887551034530482  |
| 38         | 106                  | establishment of protein localization to endoplasmic reticulum      |                  |                   |      |                    |
| GO:0000184 | 2.544223793924e-53   |                                                                     | 84.717987804878  | 0.996401633104975 |      | 39                 |
| 119        |                      | nuclear-transcribed mRNA catabolic process, nonsense-mediated decay |                  |                   |      |                    |
| GO:0070972 | 1.44053772536786e-51 |                                                                     | 81.5512048192771 |                   |      | 0.988028510137707  |
| 38         | 118                  | protein localization to endoplasmic reticulum                       |                  |                   |      |                    |
| GO:0019080 | 7.05958218321539e-47 |                                                                     | 57.6016632903295 |                   |      | 1.26434156805757   |
| 38         | 151                  | viral genome expression                                             |                  |                   |      |                    |
| GO:0019083 | 7.05958218321539e-47 |                                                                     | 57.6016632903295 |                   |      | 1.26434156805757   |
| 38         | 151                  | viral transcription                                                 |                  |                   |      |                    |
| GO:0006612 | 1.23819243971341e-46 |                                                                     | 56.5919329491881 |                   |      | 1.28108781399211   |
| 38         | 153                  | protein targeting to membrane                                       |                  |                   |      |                    |
| GO:0043624 | 1.23819243971341e-46 |                                                                     | 56.5919329491881 |                   |      | 1.28108781399211   |
| 38         | 153                  | cellular protein complex disassembly                                |                  |                   |      |                    |
| GO:0000956 | 1.62965664813558e-46 |                                                                     | 51.9512195121951 |                   |      | 1.41505778146841   |
| 39         | 169                  | nuclear-transcribed mRNA catabolic process                          |                  |                   |      |                    |
| GO:0043241 | 4.86135258011712e-46 |                                                                     | 54.214859437751  | 1.32295342882845  |      | 38                 |
| 158        |                      | protein complex disassembly                                         |                  |                   |      |                    |
| GO:0034623 | 5.73253131166412e-46 |                                                                     | 50.009485094851  | 1.45692339630475  |      | 39                 |
| 174        |                      | cellular macromolecular complex disassembly                         |                  |                   |      |                    |
| GO:0006402 | 1.52190575946733e-45 |                                                                     | 48.5566766099316 |                   |      | 1.49041588817383   |
| 39         | 178                  | mRNA catabolic process                                              |                  |                   |      |                    |
| GO:0032984 | 1.93497356766425e-45 |                                                                     | 48.2064459930314 |                   |      | 1.4987890111411 39 |
| 179        |                      | macromolecular complex disassembly                                  |                  |                   |      |                    |
| GO:0006401 | 1.46130671957922e-44 |                                                                     | 42.3943135054246 |                   |      | 1.71649020829008   |
| 40         | 205                  | RNA catabolic process                                               |                  |                   |      |                    |
| GO:0072594 | 4.95839958975132e-43 |                                                                     | 40.830376940133  | 1.70811708532281  |      | 39                 |
| 204        |                      | establishment of protein localization to organelle                  |                  |                   |      |                    |
| GO:0019058 | 3.03134643812145e-39 |                                                                     | 33.5355515325551 |                   |      | 1.93419140543907   |
| 38         | 231                  | viral infectious cycle                                              |                  |                   |      |                    |
| GO:0022415 | 1.12270140301278e-38 |                                                                     | 30.3637015781923 |                   |      | 2.17701197148986   |
| 39         | 260                  | viral reproductive process                                          |                  |                   |      |                    |
| GO:0071845 | 1.42567564632147e-38 |                                                                     | 28.508399109492  | 2.37796692270431  |      | 40                 |
| 284        |                      | cellular component disassembly at cellular level                    |                  |                   |      |                    |
| GO:0022411 | 2.54419471907449e-38 |                                                                     | 28.0406212664277 |                   |      | 2.41145941457339   |
| 40         | 288                  | cellular component disassembly                                      |                  |                   |      |                    |
| GO:0006605 | 7.84613517573552e-31 |                                                                     | 16.4485277136259 |                   |      | 3.96886028648536   |

Stable4\_20PerPair

|                                                 |          |                                                 |                  |                   |           |          |          |           |                   |      |
|-------------------------------------------------|----------|-------------------------------------------------|------------------|-------------------|-----------|----------|----------|-----------|-------------------|------|
| 41                                              | 474      | protein targeting                               |                  |                   |           |          |          |           |                   |      |
| GO:0016032                                      |          | 1.81630407034692e-30                            | 16.7240395302034 |                   |           |          |          |           | 3.77627845823818  |      |
| 40                                              | 451      | viral reproduction                              |                  |                   |           |          |          |           |                   |      |
| GO:0033365                                      |          | 1.17391236470769e-29                            | 15.8492287514612 |                   |           |          |          |           | 3.9604871635181   | 40   |
| 473                                             |          | protein localization to organelle               |                  |                   |           |          |          |           |                   |      |
| GO:0042273                                      |          | 2.69734245956887e-10                            | 124.55652173913  | 0.100477475607224 |           |          |          |           |                   | 6    |
| 12                                              |          | ribosomal large subunit biogenesis              |                  |                   |           |          |          |           |                   |      |
| GO:0022613                                      |          | 6.02907803749116e-10                            | 9.51482479784367 |                   |           |          |          |           | 1.88395266763546  |      |
| 15                                              | 225      | ribonucleoprotein complex biogenesis            |                  |                   |           |          |          |           |                   |      |
| GO:0071843                                      |          | 1.39171583155575e-09                            | 8.91130390835579 |                   |           |          |          |           | 2.00117638917722  |      |
| 15                                              | 239      | cellular component biogenesis at cellular level |                  |                   |           |          |          |           |                   |      |
| GO:0042254                                      |          | 4.12671955524885e-09                            | 11.4053438692828 |                   |           |          |          |           | 1.24759532212304  |      |
| 12                                              | 149      | ribosome biogenesis                             |                  |                   |           |          |          |           |                   |      |
| GO:0006364                                      |          | 1.56556302110038e-08                            | 13.64385662258   | 0.870804788595945 |           |          |          |           |                   | 10   |
| 104                                             |          | rRNA processing                                 |                  |                   |           |          |          |           |                   |      |
| GO:0016072                                      |          | 2.69705696344428e-08                            | 12.8198198198198 |                   |           |          |          |           | 0.921043526399557 |      |
| 10                                              | 110      | rRNA metabolic process                          |                  |                   |           |          |          |           |                   |      |
| GO:0034470                                      |          | 1.11109670401426e-07                            | 8.2814756978333  | 1.67462459345374  |           |          |          |           |                   | 12   |
| 200                                             |          | ncRNA processing                                |                  |                   |           |          |          |           |                   |      |
| GO:0034660                                      |          | 1.1214091803254e-07                             | 6.7878056350657  | 2.38634004567158  |           |          |          |           |                   | 14   |
| 285                                             |          | ncRNA metabolic process                         |                  |                   |           |          |          |           |                   |      |
| GO:0042274                                      |          | 1.30689592018947e-05                            | 34.959706959707  | 0.150716213410837 |           |          |          |           |                   | 4    |
| 18                                              |          | ribosomal small subunit biogenesis              |                  |                   |           |          |          |           |                   |      |
| Tissue: Artery_Tibial=>Thyroid Type: asymmetric |          |                                                 |                  |                   |           |          |          |           |                   |      |
| SourceGene: SERTAD2(ENSG00000179833.3)          |          |                                                 |                  |                   |           |          |          |           |                   |      |
| TargetGeneSet:                                  | UBE2J2   | RP4                                             | LZIC             | DFFA              | CLCN6     | DNAJC16  | ARHGEF19 |           |                   |      |
| ARHGEF19-AS1                                    | CROCCP3  | RP1                                             | RCC2             | TCEB3             | SRRM1     | NUDC     | XKR8     | MED18     |                   |      |
| PHACTR4                                         | PRDX3P2  | TAF12                                           | GMEB1            | SNRNP40           | TINAGL1   | PEF1     | TMEM39B  | TXLNA     | HDAC1             |      |
| ZMYM1                                           | LSM10    | INPP5B                                          | ZMPSTE24         | SLFNL1            | RNF220    | RP11     | C1orf123 |           |                   |      |
| MYSM1                                           | NFIA     | ZNHIT6                                          | CEPT1            | GOLPH3L           | ARNT      | GABPB1   | LYSMD1   | SNX27     | CHTOP             | SHE  |
| PYGO2                                           | FLAD1    | UBQLN4                                          | BGLAP            | CCT3              | ARHGEF11  | USP21    | POGK     | METTTL3   |                   |      |
| MRPS14                                          | SMG7     | BAP1                                            | TRMT1L           | CDC73             | KLHL12    | SOX13    | TMEM81   | CD46      | FBXO28            |      |
| PYCR2                                           | C1orf131 | MTR                                             | OR2L3            | PGBD2             | SMC6      | DNMT3A   | C2orf18  | PREB      |                   |      |
| SLC5A6                                          | EIF2B4   | PPM1G                                           | SLC30A6          | FAM98A            | GEMIN6    | PLEKHH2  | ABCG5    | MSH6      | PAPOLG            |      |
| PPP3R1                                          | SNRPG    | SPR                                             | CCT7             | CCDC142           | AUP1      | ART4     | MRPL15   | C2orf68   | MRPL35            |      |
| RMND5A                                          | RP1A     | MRPS5                                           | ZNF2             | ANKRD36C          |           | LMAN2L   | POLR1B   | AMMECR1L  |                   |      |
| DNAJC10                                         | ICA1L    | WDR12                                           | CREB1            | RQCD1             | TTL4      | COL4A3   | EIF4E2   | DTYMK     | CHCHD4            |      |
| C3orf19                                         | ACAA1    | GORASP1                                         | ZNF620           | NME6              | C3orf62   | DUSP7    | SCT      | FLNB-AS1  |                   | SHQ1 |
| CLCP1                                           | ABHD10   | KIAA1407                                        |                  | ARHGAP31          |           | POGLUT1  | GTF2E1   | PTPLB     | ZNF148            |      |
| SRPRB                                           | MSL2     | SLC25A36                                        |                  | UBQLN4P1          |           | MYNN     | ACTL6A   | DCUN1D1   | ABCF3             | ALG3 |
| POLR2H                                          | CRYGS    | MUC4                                            | LRCH3            | MRFAP1L1          |           | UBE2K    | DCAF4L1  | CORIN     | CLOCK             |      |
| GRSF1                                           | THAP9    | COQ2                                            | KIAA1109         |                   | IL15      | LSM6     | TIGD4    | MFAP3L    | IRF2              |      |
| BRIP1                                           | CTD      | MARCH6                                          | C5orf51          | SNX18             | IP011     | MRPS27   | DMGDH    | ZCCHC9    | WDR36             | PHAX |
| P4HA2-AS1                                       |          | IGIP                                            | HARS             | G3BP1             | GEMIN5    | CTB      | C6orf228 |           | HIST1H2BM         |      |
| TRIM27                                          | LY6G6C   | LSM2                                            | AGPAT1           | RING1             | PFDN6     | ARMC12   | TAF8     | RPL7L1    | XPO5              |      |
| TDRD6                                           | MT01     | TSPYL4                                          | GOPC             | VIP               | SUN1      | C7orf26  | MIOS     | TRGJP1    | CDK13             |      |
| URGCP                                           | PSPH     | BAZ1B                                           | RBM48            | CCDC132           | ZKSCAN5   | ZKSCAN1  | CNPY4    | SLC12A9   | CLDN15            |      |
| C7orf53                                         | METTTL2A | TNPO3                                           | SMO              | NFE2L1            | PRSS37    | OR9A3P   | ZNF786   | ZNF398    | ABCF2             |      |
| RPL23AP53                                       |          | CTA                                             | NEIL2            | POLR3D            | CHMP7     | PPP2R2A  | INTS9    | TM2D2     | YTHDF3            |      |
| ARMC1                                           | TERF1    | INTS8                                           | GRHL2            | DERL1             | TG        | ZNF623   | ZNF252   | SNAPC3    | KLHL9             |      |
| DCAF10                                          | FXN      | C9orf40                                         | CEP78            | BICD2             | FOXE1     | MURC     | RNF20    | NIPSNAP3B |                   |      |
| C9orf84                                         | PKN3     | TBC1D13                                         | TOR1B            | EXOSC2            | BRD3      | C9orf69  | SDCCAG3  | TAF3      | NUDT5             |      |
| C10orf140                                       |          | BMI1                                            | ZNF485           | ZFAND4            | ERCC6     | CSTF2T   | ADO      | MSS51     | FUT11             |      |
| AP3M1                                           | TEP1     | BTAFL1                                          | MYOF             | BTRC              | TAF5      | SMC3     | FAM175B  | AP2A2     | CHRNA10           | RRP8 |
| ZNF143                                          | RNF141   | KPPED2                                          | SLC35C1          | CELF1             | TTC9C     | ZBTB3    | MARK2    | STIP1     | PLCB3             | MEN1 |
| DNF2                                            | MRPL21   | KRTAP5-9                                        | UCP3             |                   | PME1      | C11orf30 |          | RSF1      | FAM76B            | RDX  |
| C11orf93                                        |          | ZW10                                            | PAFAH1B2         |                   | DDX6      | C2CD2L   | ZNF202   | HYLS1     | VPS26B            |      |
| RAD52                                           | FKBP4    | NCAPD2                                          | KIAA1467         |                   | KIAA0528  |          | REP15    | BCDIN3D   | TARBP2            |      |
| SMUG1                                           | DNAJC14  | DYRK2                                           | TMPO             | SART3             | ANAPC7    | ATXN2    | POP5     | RNF34     | C12orf65          |      |
| SNRNP35                                         | PUS1     | GOLGA3                                          | MRPS31P2         |                   | PSPC1-OT1 |          | LNK2     | NHLRC3    | KBTBD6            |      |
| KBTBD7                                          | NAA16    | RPS4XP16                                        |                  | DHRS12            | RAP2A     | PCID2    | TTC5     | PARP2     | MRPL52            |      |
| RBM23                                           | AJUBA    | ACIN1                                           | ZFHX2            | FITM1             | NEMF      | MAP3K9   | PROX2    | NEK9      | AHSA1             |      |
| CPSF2                                           | BTBD7    | TJP1                                            | GOLGA8B          | BUB1B             | ZFYVE19   | PPP1R14D |          | NDUFAF1   | MYEF2             | HDC  |

Stable4\_20PerPair

| Gene1                   | Gene2                   | Gene3     | Gene4                                                                                | Gene5            | Gene6            | Gene7    | Gene8    | Gene9            | Gene10   | Gene11 |  |
|-------------------------|-------------------------|-----------|--------------------------------------------------------------------------------------|------------------|------------------|----------|----------|------------------|----------|--------|--|
| AP4E1                   | PIGB                    | RNF111    | NARG2                                                                                | CSNK1G1          | UBAP1L           | DIS3L    | SMAD6    | FEM1B            | ANP32A   | HEXA   |  |
| MPI                     | ZSCAN2                  | WDR73     | NR2F2                                                                                | ASB7             | FBXL16           | CCDC154  | ZNF205   | USP7             | ERCC4    |        |  |
| UBFD1                   | MAZ                     | TAOK2     | GDPD3                                                                                | SULT1A3          | CD2BP2           | TBC1D10B |          | FBXL19-AS1       |          |        |  |
| FBXL19                  | PAPD5                   | CTCF      | TMEM170A                                                                             |                  | C16orf46         |          | MLYCD    | USP10            | ZC3H18   |        |  |
| RNMTL1                  | SGSM2                   | RAP1GAP2  |                                                                                      | DHX33            | DERL2            | SLC16A13 |          | ZSWIM7           | PIGL     |        |  |
| ALKBH5                  | C17orf51                |           | SDF2                                                                                 | C17orf63         |                  | BLMH     | CRLF3    | UTP6             | ZNF830   |        |  |
| PEX12                   | DHRS11                  | PIP4K2B   | MED1                                                                                 | CNP              | NAGLU            | FAM134C  | PSME3    | RUNDC1           | UBTF     |        |  |
| C17orf69                | UBE2Z                   | ZNF652    | PPP1R9B                                                                              | APPBP2           | DCAF7            | FTSJ3    | SMARCD2  | FAM104A          | HN1      |        |  |
| UNK                     | QRICH2                  | CANT1     | ENGASE                                                                               | FSCN2            | SIRT7            | RP13     | ZNF397   | CCDC11           | BCL2     | DSEL   |  |
| RTTN                    | ZADH2                   | MIER2     | LMNB2                                                                                | ZNF555           | PIAS4            | ZBTB7A   | DPP9     | SAFB             | PCP2     |        |  |
| ELAVL1                  | PIN1                    | ZGLP1     | ZNF627                                                                               | ZNF441           | ZNF799           | ZNF490   | WDR83    | FARSA            | TRMT1    |        |  |
| SAMD1                   | NR2F6                   | GLT25D1   | SUGP1                                                                                | ANKRD27          | KCTD15           | WTIP     | KRTDAP   | LIN37            | ZNF790   |        |  |
| ZNF571                  | ZNF781                  | ZNF546    | MAP3K10                                                                              | MIA              | IRGQ             | ZNF284   | BLOC1S3  | DMPK             | MYPOP    |        |  |
| STRN4                   | KPTN                    | KCNJ14    | BAX                                                                                  | SIGLEC16         |                  | NAPSA    | CTU1     | ZNF615           | ZNF808   |        |  |
| ZNF347                  | ZNF677                  | ZNF761    | U2AF2                                                                                | ZNF264           | ZNF543           | ZNF547   | ZNF749   | ZNF549           | ZNF586   |        |  |
| ZNF587                  | ZNF814                  | ZNF417    | ZNF329                                                                               | ZSCAN22          | ZNF132           | FAM110A  | NOP56    | NANP             | COMMD7   |        |  |
| DNMT3B                  | RBL1                    | FITM2     | RP3                                                                                  | ZSWIM3           | ZSWIM1           | NCOA5    | ELMO2    | ARFGEF2          | KRT18P4  |        |  |
| TMEM189                 | ADNP                    | ZFP64     | CSTF1                                                                                | VAPB             | TCFL5            | DPH3P1   | RBM11    | TCP10L           | C21orf59 |        |  |
| CECR5                   | KRT18P5                 | CRKL      | UBE2L3                                                                               | ZNF70            | HPS4             | RNF215   | PRR14L   | ANKRD54          | POLR2F   |        |  |
| XPNPEP3                 | L3MBTL2                 | HDHD1     | SCML1                                                                                | ATP6AP2          | ZNF673           | ZNF41    | GPKOW    | PPP1R3F          | SHROOM4  | PHF8   |  |
| WNK3                    | FAM155B                 | CXorf65   | ACRC                                                                                 | DMRTC1           | PABPC5           | UTP14A   | ZNF449   | NAA10            |          |        |  |
| GOBPID                  | Pvalue                  | OddsRatio |                                                                                      | ExpCount         |                  | Count    | Size     | Term             |          |        |  |
| GO:0071843              | 22                      | 239       | 2.48233480270064e-06                                                                 | 3.45626671218069 |                  |          |          | 7.06200262957581 |          |        |  |
|                         |                         |           | cellular component biogenesis at cellular level                                      |                  |                  |          |          |                  |          |        |  |
| GO:0022613              | 21                      | 225       | 3.37420959179176e-06                                                                 | 3.50405679513185 |                  |          |          | 6.64832883537471 |          |        |  |
|                         |                         |           | ribonucleoprotein complex biogenesis                                                 |                  |                  |          |          |                  |          |        |  |
| GO:0034660              | 24                      | 285       | 4.16704383617833e-06                                                                 | 3.14035538062234 |                  |          |          | 8.42121652480797 |          |        |  |
|                         |                         |           | ncRNA metabolic process                                                              |                  |                  |          |          |                  |          |        |  |
| GO:0006353              | 81                      |           | 4.24157232674311e-06                                                                 | 5.84808800419068 |                  |          |          | 2.3933983807349  | 12       |        |  |
|                         |                         |           | DNA-dependent transcription, termination                                             |                  |                  |          |          |                  |          |        |  |
| GO:0006397              | 29                      | 399       | 7.8812546341673e-06                                                                  | 2.68889039793562 |                  |          |          | 11.7897031347312 |          |        |  |
|                         |                         |           | mRNA processing                                                                      |                  |                  |          |          |                  |          |        |  |
| GO:0000377              | 19                      | 204       | 1.01642442008761e-05                                                                 | 3.48358505564388 |                  |          |          | 6.02781814407307 |          |        |  |
|                         |                         |           | RNA splicing, via transesterification reactions with bulged adenosine as nucleophile |                  |                  |          |          |                  |          |        |  |
| GO:0000398              | 19                      | 204       | 1.01642442008761e-05                                                                 | 3.48358505564388 |                  |          |          | 6.02781814407307 |          |        |  |
|                         |                         |           | nuclear mRNA splicing, via spliceosome                                               |                  |                  |          |          |                  |          |        |  |
| GO:0000375              | 209                     |           | 1.43651180966434e-05                                                                 | 3.3906862745098  | 6.17555878485918 |          |          |                  |          | 19     |  |
|                         |                         |           | RNA splicing, via transesterification reactions                                      |                  |                  |          |          |                  |          |        |  |
| Tissue: Artery_Tibial=> | Thyroid                 | Type:     | asymmetric                                                                           |                  |                  |          |          |                  |          |        |  |
| SourceGene:             | TTI1(ENSG00000101407.8) |           |                                                                                      |                  |                  |          |          |                  |          |        |  |
| TargetGeneSet:          | DFFB                    | ERRFI1    | LZIC                                                                                 | RP11             | DFFA             | PLOD1    | DNAJC16  | ARHGEF19         |          |        |  |
| ARHGEF19-AS1            | CROCCP3                 | HP1BP3    | TCEB3                                                                                | RP1              | XKR8             | EYA3     | MED18    | PHACTR4          |          |        |  |
| TXLNA                   | SLFN1L                  | MMACHC    | C1orf123                                                                             | MYSM1            | GADD45A          | RP4      | SLC35A3  | ATXN7L2          |          |        |  |
| CYB561D1                | GDAP2                   | PIAS3     | GOLPH3L                                                                              | LYSMD1           | SNX27            | INTS3    | GBAP1    | FAM189B          | CLK2     |        |  |
| UBQLN4                  | SEMA4A                  | VHLL      | CCT3                                                                                 | C1orf182         | USP21            | POGK     | VAMP4    | SMG7             |          |        |  |
| KLHL12                  | SOX13                   | TMEM81    | SRGAP3                                                                               | CD55             | CD46             | ATF3     | PGBD2    | ID2              | TTC32    |        |  |
| C2orf44                 | SLC5A6                  | CCDC121   | UBASH3A                                                                              | EHD3             | FAM98A           | GEMIN6   | ARHGEF33 | SNORA67          |          |        |  |
| PAPOLG                  | XPO1                    | DBIL5P2   | PPP3R1                                                                               | AUP1             | MRPL35           | RMND5A   | RPIA     | MRPS5            | ZNF2     |        |  |
| LMAN2L                  | C2orf29                 | RBP4      | AMMECR1L                                                                             | R3HDM1           | C2orf77          | ANKAR    | OSGEPL1  | SATB2            |          |        |  |
| ICA1L                   | WDR12                   | SPAG16    | BCS1L                                                                                | DTYMK            | CRELD1           | C3orf19  | RFTN1    | GORASP1          | ZNF619   |        |  |
| ZDHHC3                  | NME6                    | DUSP7     | ABHD6                                                                                | SHQ1             | ADPRH            | CDV3     | SLC25A36 | TIPARP-AS1       |          |        |  |
| PIK3CA                  | ABCC5                   | ABCF3     | POLR2H                                                                               | CRYGS            | RFC4             | TMEM128  | DCAF4L1  | YIPF7            | REST     |        |  |
| CENPC1                  | AREGB                   | THAP9     | CCNA2                                                                                | IL15             | BRIP1            | MARCH6   | C5orf51  | CTD              | IP011    |        |  |
| ZNF366                  | ZCCHC9                  | FAM174A   | XBP1P1                                                                               | P4HA2            | SHROOM1          | CTB      | HARS2    | PCDHGB8P         |          |        |  |
| ARAP3                   | PCDH12                  | LSM11     | CPEB4                                                                                | TSPAN17          | GNL1             | PRR3     | C6orf25  | LSM2             | NOTCH4   |        |  |
| PFDN6                   | TAF8                    | GUSBP4    | LINC00472                                                                            | C6orf203         |                  |          | MIOS     | CDK13            | URGCP    | PSPH   |  |
| GS1                     | RHBDD2                  | RBM48     | CCDC132                                                                              | DLX5             | ZKSCAN1          | METTL2A  | TNPO3    | CNOT4            | ZNF398   |        |  |
| ZNF862                  | GIMAP4                  | SLC35G5   | HMBX1                                                                                | TTI2             | C8orf40          | ARMC1    | INTS8    | GAPDHP62         |          |        |  |
| GRHL2                   | LRRC6                   | ZNF623    | RANBP6                                                                               | SNAPC3           | KLHL9            | FANCG    | C9orf103 | SECISBP2         |          |        |  |
| FAM22G                  | ALG2                    | NR4A3     | RNF20                                                                                | TRIM32           | LHX6             | PRPS1P2  | ZBTB43   | SH2D3C           | CCBL1    |        |  |
| EXOSC2                  | AK8                     | C9orf69   | QSOX2                                                                                | SDCCAG3          | INPP5E           | NOXA1    | FBXO18   | CDNF             | BMI1     |        |  |
| LINC00202               |                         | ZNF485    | ERCC6                                                                                | CSTF2T           | CHST3            | MSS51    | AP3M1    | ENTPD7           | C10orf2  | BTRC   |  |



STable4\_20PerPair

|            |           |                      |          |          |         |            |          |         |             |
|------------|-----------|----------------------|----------|----------|---------|------------|----------|---------|-------------|
| NSMCE4A    | ZNF195    | CHRNA10              | UBQLNL   | TRIM34   | TRIM5   | RRP8       | ZNF143   | SLC35C1 | TTC9C       |
| ZBTB3      | STIP1     | PLCB3                | RPS6KA4  | MEN1     | PPP2R5B | C11orf85   |          | DPF2    | RBM14       |
| SUV420H1   |           | UCP3                 | C11orf30 |          | FAM76B  | C11orf34   |          | ZW10    | DPAGT1      |
| HSPA8      | ZNF202    | VPS26B               | RAD52    | FKBP4    | KLRAP1  | REP15      | PUS7L    | TUBA1C  | BCDIN3D     |
| ACVRL1     | KRT81     | SMUG1                | OBFC2B   | TIMELESS |         | DYRK2      | IL26     | ALDH2   | DYNLL1      |
| RNF34      | GOLGA3    | EFHA1                | KBTBD6   | KBTBD7   | ITM2B   | RPS4XP16   |          | DHRS12  | BORA        |
| DNAJC3-AS1 |           | RAP2A                | PROZ     | PCID2    | TTC5    | PARP2      | ACIN1    | KLHDC1  | HNRPCP EXD2 |
| MAP3K9     | NEK9      | AHSA1                | SPTLC2   | ZC3H14   | RPS6KA5 | BTBD7      | GOLGA8B  | THBS1   | ZFYVE19     |
| PPP1R14D   |           | ZFP106               | CSNK1G1  | PARP16   | ZSCAN2  | ZNF774     | FBXL16   | LMF1    | ERCC4       |
| UBFD1      | DCTN5     | PLK1                 | MAZ      | GDPD3    | CNEP1R1 | SALL1      | DOK4     | DDX19B  | TMEM170A    |
| ZC3H18     | GALNS     | SRR                  | ZMYND15  | DHX33    | DERL2   | SLC35G6    | C17orf51 |         | WSB1        |
| TMEM199    | UTP6      | CDK5R1               | CCL2     | CCT6B    | DHRS11  | PIP4K2B    | WIPF2    | LEPREL4 | FAM134C     |
| HOXB-AS2   |           | HOXB4                | DLX4     | PPP1R9B  | PCTP    | TRIM25     | HEATR6   | FTSJ3   | HN1         |
| QRICH2     | AFMID     | CANT1                | CBX2     | RP13     | HRH4    | ZNF24      | C18orf54 |         | ONECUT2     |
| ZADH2      | ZNF555    | MRPL54               | TNFSF9   | PEX11G   | ZGLP1   | RAB3D      | ZNF788   | ZNF799  | ZNF490      |
| WDR83      | TRMT1     | SAMD1                | TMEM221  | JUND     | SUGP1   | ZNF253     | NUDT19   | KCTD15  | ZNF565      |
| ZNF260     | HKR1      | ZFP36                | MIA      | SMG9     | ZNF284  | ZNF225     | GEMIN7   | BLOC1S3 | MYPOP       |
| CPT1C      | NR1H2     | NAPSA                | CTU1     | ZNF175   | ZNF816  | ZNF347     | ZNF761   | U2AF2   | ZNF835      |
| ZNF264     | ZNF543    | ZNF547               | ZNF749   | ZNF549   | ZNF550  | ZNF814     | ZNF329   | ZSCAN22 | ZNF132      |
| NOP56      | CRNKL1    | DNMT3B               | ZNF341   | EDEM2    | NFS1    | SCAND1     | FITM2    | ZSWIM3  | ZSWIM1      |
| NCOA5      | KRT18P4   | ADNP                 | ZFP64    | FAM209B  | GTPBP5  | ITSN1      | HMG1     | PRDM15  | DSTNP1      |
| CECR5      | KRT18P5   | CRKL                 | UBE2L3   | NF2      | RNF215  | PRR14L     | NCAPH2   | SHANK3  | PPP2R3B-AS1 |
| HDHD1      | SCML1     | CXorf36              | ZNF673   | ZNF41    | NUS1P1  | ZNF81      | KCND1    | SHROOM4 | FAM123B     |
| BHLHB9     | ZNF449    |                      |          |          |         |            |          |         |             |
| GOBPID     | Pvalue    | OddsRatio            |          | ExpCount |         | Count      | Size     | Term    |             |
| Tissue:    | Thyroid=> | Heart_Left_Ventricle |          | Type:    |         | asymmetric |          |         |             |

SourceGene: APOM(ENSG00000204444.6) s

STable4\_20PerPair

|                |          |          |           |          |         |          |          |         |           |      |
|----------------|----------|----------|-----------|----------|---------|----------|----------|---------|-----------|------|
| TargetGeneSet: | HP1BP3   | NUDC     | EYA3      | RCC1     | RP11    | LEPROT   | CCBL2    | RPAP2   |           |      |
| ALG14          | FAM46C   | APH1A    | GOLPH3L   | CCT3     | USP21   | HSD17B7  | CENPL    | CACYBP  | TMEM81    |      |
| INTS7          | IRF2BP2  | ZNF692   | PQLC3     | SLC5A6   | HNRPLL  | XPO1     | CCT4     | C2orf42 | CCT7      | AUP1 |
| LMAN2L         | LYG1     | GPR17    | ARL6IP6   | DNAJC10  | HSPD1   | SATB2    | SLC23A3  | CRELD1  | NUP210    |      |
| NGLY1          | STT3B    | TRANK1   | ZNF619    | CCK      | HEMK1   | PPP4R2   | CPOX     | TPRA1   | MLF1      | FXR1 |
| SOX2           | PPP1R2   | TCTEX1D2 |           | CEP19    | ABCA11P | HGFAC    | DCAF16   | TBC1D19 | PGM2      |      |
| APBB2          | GNPDA2   | UBE2D3   | TBCK      | PLK4     | CTSO    | PPID     | SH3RF1   | ANKRD37 | C5orf55   | CCT5 |
| CTD            | GPBP1    | KLHL35   | FAM13B    | BRD8     | WDR55   | PCDHB16  | ADR2     | SNRNP48 | GNL1      |      |
| CNPY3          | RP1      | HSP90AB1 |           | AARS2    | FBX09   | PM20D2   | SES1     | MICAL1  | RSPH4A    | TCP1 |
| KLHL7-AS1      |          | TRA2A    | STYXL1    | SAP25    | MOSPD3  | NAPEPLD  | RBM28    | C7orf29 | GBX1      |      |
| SLC39A14       |          | GTF2E2   | THAP1     | PYCRL    | ZNF623  | NRBP2    | DNAJA1   | RECK    | C9orf71   |      |
| NCBP1          | KIAA0368 |          | ZBTB34    | FPGS     | MAMDC4  | WAC      | OR13A1   | PBLD    | HNRNP3    |      |
| P4HA1          | AP2A2    | C11orf91 |           | EML3     | NXF1    | STIP1    | SLC25A45 |         | EED       |      |
| CHORDC1        | SRSF8    | PHLDB1   | DPAGT1    | HINFP    | HSPA8   | RAD52    | FKBP4    | RP4     | IFFO1     |      |
| CDKN1B         | TM7SF3   | DAZAP2   | DNAJC14   | PAN2     | PTGES3  | ARHGAP9  | HSP90B1  | SELPLG  | LINC00173 |      |
| GCN1L1         | CRYL1    | HSPH1    | LHFP      | RPS4XP16 |         | SUGT1    | GPR180   | PCID2   | ABHD4     |      |
| RBM23          | ACIN1    | ZC2HC1C  | AHSA1     | ZC3H14   | PAPOLA  | VRK1     | HSP90AA1 |         | ATPBD4    |      |
| TMEM87A        | PIGB     | ANKDD1A  | C15orf44  |          | POLG    | DNASE1L2 |          | TBC1D24 | GDPD3     |      |
| ZDHHC7         | CDK10    | MIR22HG  | C17orf108 |          | UNC119  | DHRS13   | KAT2A    | NMT1    | STXBP4    |      |
| WIPI1          | QRICH2   | JMJD6    | C17orf90  |          | IMPACT  | ABCA7    | CIRBP    | SAFB    | PNPLA6    | RETN |
| ZNF788         | ATP13A1  | DPY19L3  | MED29     | DEDD2    | KPTN    | ZNF580   | TRIM28   | PYGB    | TTI1      |      |
| SNHG11         | RNF114   | DNAJC5   | USP16     | MORC3    | TOP3B   | PRR14L   | TRIOBP   | RANGAP1 | FAM118A   |      |
| TBC1D22A       |          | GPR173   | RP6       |          |         |          |          |         |           |      |

|        |        |           |          |       |      |      |
|--------|--------|-----------|----------|-------|------|------|
| GOBPID | Pvalue | OddsRatio | ExpCount | Count | Size | Term |
|--------|--------|-----------|----------|-------|------|------|

|            |          |             |            |    |     |                 |
|------------|----------|-------------|------------|----|-----|-----------------|
| GO:0006457 | 5.05E-14 | 10.53814103 | 2.46626531 | 21 | 216 | protein folding |
|------------|----------|-------------|------------|----|-----|-----------------|

STable4\_20PerPair

|                       |          |             |             |   |    |     |
|-----------------------|----------|-------------|-------------|---|----|-----|
| GO:0006458            | 1.69E-06 | 14.34033372 | 0.582312643 | 7 | 51 | 'de |
| novo' protein folding |          |             |             |   |    |     |

|                                         |          |             |             |   |    |     |
|-----------------------------------------|----------|-------------|-------------|---|----|-----|
| GO:0051084                              | 1.30E-05 | 13.43962264 | 0.525223168 | 6 | 46 | 'de |
| novo' posttranslational protein folding |          |             |             |   |    |     |

Tissue: Heart\_Left\_Ventricle=>Thyroid    Type: asymmetric

SourceGene:    ATP13A1(ENSG00000105726.11)    ATPase type 13A1

STable4\_20PerPair

|                |           |        |       |          |         |           |            |       |        |      |
|----------------|-----------|--------|-------|----------|---------|-----------|------------|-------|--------|------|
| TargetGeneSet: | C1orf159  | HP1BP3 | TXLNA | CTPS     | U2      | CCT3      | C1orf114   |       |        |      |
| PREB           | SLC5A6    | FAM98A | CCT4  | SPR      | CCT7    | LMAN2L    | ARL6IP6    | SSB   | STAT4  | NEK4 |
| KIAA1407       |           | RP11   | CCT5  | RPP40    | SNRNP48 | HIST1H2BK |            | APOM  | RP1    | PEX6 |
| HSP90AB1       |           | TDRD6  | MT01  | LCA5     | CA3     | TCEA1P1   | DNAJA1     | PTAR1 | GTF3C5 | DNA2 |
| CTD            | IPO7      | STIP1  | C2CD3 | EED      | CEP57   | RNF214    | FKBP4      | RP4   | GPR162 | CCT2 |
| AMDHD1         | OR7E36P   | NEK9   | AHSA1 | HSP90AA1 |         | EXOC3L4   | FBXL19-AS1 |       | CYB5D2 |      |
| MED31          | C17orf108 |        | SDF2  | MLLT6    | KAT2A   | PHB       | ZNF441     | CTA   | LARGE  |      |
| HDHD1          | FAM45B    | KDM5D  |       |          |         |           |            |       |        |      |

| GOBPID                                  | Pvalue   | OddsRatio | ExpCount    | Count       | Size | Term |
|-----------------------------------------|----------|-----------|-------------|-------------|------|------|
| GO:0006457                              | 2.28E-10 |           | 18.57632362 | 0.777247249 | 11   | 216  |
| protein folding                         |          |           |             |             |      |      |
| GO:0051084                              | 6.07E-07 |           | 37.25480021 | 0.165524877 | 5    | 46   |
| novο' posttranslational protein folding |          |           |             |             |      | 'de  |
| GO:0006458                              | 1.03E-06 |           | 33.19380204 | 0.183516712 | 5    | 51   |
| novο' protein folding                   |          |           |             |             |      | 'de  |

Tissue: Thyroid=>Heart\_Left\_Ventricle Type: asymmetric

STable4\_20PerPair

SourceGene:       CRIPT(ENSG00000119878.5)       cysteine-rich PDZ-binding protein

|                |        |          |        |         |         |         |          |         |         |         |      |
|----------------|--------|----------|--------|---------|---------|---------|----------|---------|---------|---------|------|
| TargetGeneSet: | RP11   | DFFB     | EPHA2  | MFAP2   | HSPG2   | NUDC    | EYA3     | RCC1    |         |         |      |
|                | PTPRU  | C1orf212 | ZNF691 | GPBP1L1 | SLC35D1 | CYR61   | KIAA1107 | RPAP2   |         |         |      |
|                | FRRS1  | SASS6    | NOTCH2 | ECM1    | GOLPH3L | BNIPL   | LYSMD1   | CREB3L4 | PYGO2   | FAM189B | CCT3 |
|                | CRABP2 | CD1C     | CASQ1  | USP21   | B4GALT3 | HSD17B7 | RGS5     | METTL13 | FAM163A | LAMC1   |      |
|                | TMEM81 | RBBP5    | ACTA1  | TFB2M   | PXDN    | NBAS    | RHOB     | C2orf44 | EMILIN1 | SLC5A6  | ASB3 |

Stable4\_20PerPair

|           |            |          |           |          |          |          |           |           |           |      |
|-----------|------------|----------|-----------|----------|----------|----------|-----------|-----------|-----------|------|
| XP01      | C2orf42    | SPR      | CCDC142   | AUP1     | HTRA2    | LOXL3    | SEMA4F    | ELMOD3    | LINC00152 |      |
| MRPS5     | LMAN2L     | FBLN7    | STEAP3    | TNFAIP6  | ITGA4    | COL3A1   | COL5A2    | SATB2     | IDH1      | FN1  |
| BCS1L     | SLC23A3    | FAM134A  | COL6A3    | LRRFIP1  | CRELD1   | TRANK1   | ZNF619    | IP6K1     | TNNC1     |      |
| EPHA3     | CPOX       | ABI3BP   | CBLB      | CCDC80   | CHCHD6   | TPRA1    | IL20RB    | ARID4A    | SSR3      |      |
| PPM1L     | FXR1       | EIF4A2   | HRASLS    | PPP1R2   | ABCA11P  | SPON2    | WDR1      | APBB2     | 11-Sep    |      |
| BMP2K     | TIGD2      | UNC5C    | ADH1A     | UBE2D3   | TBCK     | AR SJ    | SEC24D    | PDE5A     | CTSO      | PPID |
| SH3RF1    | LPCAT1     | CTD      | SLC38A9   | KLHL35   | LHFPL2   | ARSK     | FAM13B    | BRD8      | CYSTM1    | SOX9 |
| TCERG1    | MIR143HG   |          | CSF1R     | PDGFRB   | SPARC    | C5orf4   | PDLIM7    | ZNF184    | GNL1      |      |
| COL11A2   | RGL2       | TEAD3    | TOMM6     | SRF      | HSP90AB1 |          | FBXO9     | EYS       | MT01      |      |
| COL12A1   | KIAA1009   |          | PM20D2    | SESN1    | RSPH4A   | SLC35F1  | TRMT11    | BMPR1APS1 |           |      |
| TCF21     | FNDC1      | TCP1     | TTYH3     | ZNF890P  | ACTB     | C7orf26  | TRA2A     | RP9P      | 7-Sep     | VWC2 |
| GRB10     | PSPH       | SEMA3C   | KIAA1324L |          | COL1A2   | ZKSCAN5  | FAM200A   | TAF6      | GCC1      | ARF5 |
| CALU      | TNPO3      | ZYX      | CHPF2     | PPP2R2A  | GTF2E2   | PLAT     | THAP1     | SDC2      | UHRF2     |      |
| TYRP1     | DNAJB5     | TPM2     | GLIPR2    | GNE      | RG9MTD3  | NOL8     | OGN       | ECM2      | COL15A1   |      |
| KIAA0368  |            | ZBTB34   | FPGS      | C9orf114 |          | COL5A1   | COBRA1    | WAC       | ITGB1     |      |
| ZNF37BP   | CSGALNACT2 |          | EGR2      | FRAT1    | FRAT2    | MARVELD1 |           | KAZALD1   | TMEM180   | TAF5 |
| FAM160B1  |            | VENTX    | AP2A2     | HTATIP2  | SLC39A13 |          | LRRC55    | PRG2      | SLC43A1   |      |
| STIP1     | MEN1       | CFL1     | EFEMP2    | EIF1AD   | RELT     | RAB6A    | PICALM    | SCN4B     | IFT46     |      |
| PHLDB1    | DPAGT1     | HINFP    | SRPR      | RAD52    | FKBP4    | RP4      | TSPAN9    | NTN4      | EMP1      |      |
| REP15     | FAR2       | C12orf35 |           | LIMA1    | ZC3H10   | PAN2     | AVIL      | CTDSP2    | MSRB3     |      |
| BBS10     | CMKLR1     | SIRT4    | CCDC169   | LHFP     | EBPL     | SUGT1    | LINC00346 |           | ADPRHL1   |      |
| ARHGEF40  |            | LRFN5    | RPL32P29  |          | FRMD6    | DACT1    | MAX       | ZFYVE1    | ABCD4     |      |
| C14orf118 |            | VRK1     | PLD4      | FAN1     | ACTC1    | ATPBD4   | GPR176    | BAHD1     | ZFYVE19   |      |
| MFAP1     | CTDSPL2    | FBN1     | TPM1      | ANKDD1A  | CILP     | IGDCC4   | NPTN      | LOXL1     | COMMD4    |      |
| WDR61     | ADAMTSL3   |          | POLG      | MRPL28   | RHOT2    | PGPEP1   | TBC1D24   | VASN      | MAZ       |      |
| BCL7C     | HERPUD1    | HSD11B2  | TSNAXIP1  |          | CENPN    | CDK10    | DEF8      | RNMTL1    | ZMYND15   | PFN1 |
| SPAG7     | DERL2      | EIF5A    | CTC1      | C17orf39 |          | SMCR7    | SDF2      | ZNF830    | FBXL20    |      |
| KAT2A     | FAM134C    | NMT1     | SCRN2     | COP22    | COL1A1   | MRC2     | FTSJ3     | GGA3      | RECQL5    |      |
| SRP68     | QRICH2     | SPHK1    | ARHGAP28  |          | CXXC1    | POLRMT   | MOB3A     | PNPLA6    | ZNF558    | KRI1 |
| CNN1      | ZNF788     | PRKACA   | C19orf44  |          | DDA1     | DPY19L3  | ZNF585B   | PSMC4     | LTBP4     |      |
| TMEM91    | DEDD2      | ZNF233   | VASP      | KPTN     | LIN7B    | ZNF473   | SHANK1    | ZNF577    | ZNF816    |      |
| CCDC106   | ZNF667     | ZNF211   | ZNF671    | ZNF329   | SNRPB    | DDR GK1  | SLC23A2   | CRNKL1    | PYGB      |      |
| ZNF337    | TTI1       | KIAA1755 |           | PKIG     | SYS1     | PCMTD2   | LINC00478 |           | C21orf119 |      |
| RCAN1     | C21orf2    | COL6A1   | COL6A2    | MMP11    | TFIP11   | DUSP18   | MYH9      | MFNG      | TRIOBP    |      |
| GALR3     | RANGAP1    | TOB2     | POLDIP3   | GPM6B    | DMD      | GPR173   | SPIN4     | RP6       | ARMCX4    |      |
| RAB9B     | NRK        | KIAA1210 |           | SRPK3    | NLGN4Y   |          |           |           |           |      |

GOBPID Pvalue OddsRatio ExpCount Count Size Term

STable4\_20PerPair

|                                   |          |             |             |    |     |
|-----------------------------------|----------|-------------|-------------|----|-----|
| GO:0030198                        | 2.21E-10 | 6.896178093 | 3.431458031 | 20 | 161 |
| extracellular matrix organization |          |             |             |    |     |

|                                      |          |             |             |    |     |
|--------------------------------------|----------|-------------|-------------|----|-----|
| GO:0043062                           | 2.47E-10 | 6.847124413 | 3.452771435 | 20 | 162 |
| extracellular structure organization |          |             |             |    |     |

STable4\_20PerPair

|                        |          |             |             |    |     |      |
|------------------------|----------|-------------|-------------|----|-----|------|
| GO:0007411<br>guidance | 1.27E-06 | 3.486063596 | 7.310497543 | 23 | 343 | axon |
|------------------------|----------|-------------|-------------|----|-----|------|

|                                            |          |             |             |   |    |  |
|--------------------------------------------|----------|-------------|-------------|---|----|--|
| GO:0030199<br>collagen fibril organization | 4.95E-06 | 12.62701252 | 0.703342329 | 7 | 33 |  |
|--------------------------------------------|----------|-------------|-------------|---|----|--|



STable4\_20PerPair

|                              |          |             |             |    |     |
|------------------------------|----------|-------------|-------------|----|-----|
| GO:0030029                   | 1.87E-05 | 2.844863297 | 9.207390492 | 24 | 432 |
| actin filament-based process |          |             |             |    |     |

STable4\_20PerPair

Tissue: Thyroid=>Heart\_Left\_Ventricle Type: asymmetric

SourceGene: CXCL17(ENSG00000189377.3) chemokine (C-X-C motif) ligand 17  
 (no ESTs in heart or thyroid)

|                |         |           |         |          |         |         |         |           |        |      |
|----------------|---------|-----------|---------|----------|---------|---------|---------|-----------|--------|------|
| TargetGeneSet: | WRAP73  | DFFB      | HSPG2   | ASAP3    | PTPRU   | COL16A1 | GPBP1L1 | NRD1      |        |      |
| RPAP2          | CTSO    | BNIPL     | EFNA4   | USP21    | DPT     | TMEM81  | C2orf44 | ARHGGEF33 |        |      |
| SEMA4F         | PROM2   | FBLN7     | LYPD1   | DCAF17   | FRZB    | COL3A1  | COL5A2  | FN1       | RBM6   |      |
| ABI3BP         | COL6A6  | ARID4A    | SPON2   | 11-Sep   | ARSJ    | PDE5A   | RAB33B  | ADAMTS12  |        |      |
| KLHL35         | LOX     | PHF15     | SPARC   | RP11     | ZFP62   | DTNBP1  | ZNF184  | ZNRD1-AS1 |        |      |
| MOCS1          | TPBG    | KIAA1009  |         | CASP8AP2 |         | FNDC1   | VWC2    | COL1A2    | CALU   | ZYX  |
| MATN2          | COL14A1 | GLIS3-AS1 |         | TYRP1    | RG9MTD3 | OGN     | ASPN    | ECM2      | TNFSF8 |      |
| COL5A1         | ITGB1   | ZNF37BP   | SPON1   | SLC39A13 |         | DPAGT1  | HINFP   | PUS3      | CLEC4A | EMP1 |
| C12orf35       |         | LUM       | SLC41A2 | TMEM119  | TMEM233 | COL4A1  | COL4A2  | FRMD6     | ABCD4  |      |
| GPR176         | FBN1    | CILP      | LOXL1   | VASN     | MMP2    | TXNL4B  | CDK10   | ASGR1     | MFAP4  |      |
| FLOT2          | MLLT6   | STAT3     | COL1A1  | GGA3     | WDR45L  | NR2C2AP | ZNF600  | DDRGK1    | PYGB   |      |
| FAM83D         | RP3     | COL6A2    | CTA     | GPM6B    | LAMP2   |         |         |           |        |      |

|        |        |           |          |       |      |      |
|--------|--------|-----------|----------|-------|------|------|
| GOBPID | Pvalue | OddsRatio | ExpCount | Count | Size | Term |
|--------|--------|-----------|----------|-------|------|------|

|            |          |             |             |    |     |                                   |
|------------|----------|-------------|-------------|----|-----|-----------------------------------|
| GO:0030198 | 5.75E-15 | 20.10539346 | 1.047263165 | 16 | 161 | extracellular matrix organization |
|------------|----------|-------------|-------------|----|-----|-----------------------------------|

STable4\_20PerPair

GO:0043062 6.34E-15 19.9662803 1.053767905 16 162  
 extracellular structure organization

GO:0030199 4.78E-13 63.23382353 0.214656425 9 33  
 collagen fibril organization

GO:0071230 2.28E-09 41.17528736 0.227665905 7 35  
 cellular response to amino acid stimulus

GO:0071229 7.37E-09 33.89486139 0.266694346 7 41  
 cellular response to acid

GO:0071418 3.12E-08 26.78374766 0.325237008 7 50  
 cellular response to amine stimulus

STable4\_20PerPair

|                                       |          |             |             |   |     |
|---------------------------------------|----------|-------------|-------------|---|-----|
| GO:0071417                            | 4.14E-08 | 25.58978289 | 0.338246488 | 7 | 52  |
| cellular response to organic nitrogen |          |             |             |   |     |
| GO:0043200                            | 2.01E-07 | 19.83610781 | 0.42280811  | 7 | 65  |
| response to amino acid stimulus       |          |             |             |   |     |
| GO:0001101                            | 1.28E-06 | 14.72929561 | 0.552902913 | 7 | 85  |
| response to acid                      |          |             |             |   |     |
| GO:0014075                            | 4.69E-06 | 11.95246648 | 0.669988236 | 7 | 103 |
| response to amine stimulus            |          |             |             |   |     |
| GO:0001957                            | 5.26E-06 | 157.7362637 | 0.039028441 | 3 | 6   |
| intramembranous ossification          |          |             |             |   |     |

STable4\_20PerPair

|                                   |          |             |             |    |     |      |
|-----------------------------------|----------|-------------|-------------|----|-----|------|
| GO:0036072<br>direct ossification | 5.26E-06 | 157.7362637 | 0.039028441 | 3  | 6   |      |
| GO:0007411<br>guidance            | 1.37E-05 | 5.598599216 | 2.231125874 | 11 | 343 | axon |
| GO:0043588<br>development         | 1.94E-05 | 17.47801661 | 0.331741748 | 5  | 51  | skin |

Tissue: Thyroid=>Heart\_Left\_Ventricle Type: asymmetric

SourceGene: DNAJA3(ENSG00000103423.9) "DnaJ (Hsp40) homolog, subfamily A, member 3"

|                |         |          |        |        |        |        |          |         |        |          |      |
|----------------|---------|----------|--------|--------|--------|--------|----------|---------|--------|----------|------|
| TargetGeneSet: | KLHL21  | HAX1     | MEF2D  | MRPL24 | TAGLN2 | ADCY10 | MYL3     | FTH1P23 |        |          |      |
|                | NAP1L5  | RPS23    | RNF44  | FGFR4  | SSR1   | LEMD2  | TOMM7    | BMPER   | MRPS24 | CTA      |      |
|                | NDUFB2  | RP11     | MMP16  | NDUFB9 | GRIN3A | PSMB7  | USP20    | PPP1R26 | RSU1   | NDUFB8   |      |
|                | NDUFS3  | C11orf10 |        | COX8A  | ADRBK1 | PRKRIR | C11orf67 |         | ZBTB44 | FOXJ2    | FAR2 |
|                | RHOJ    | SLIRP    | NDUFB1 | YY1    | AP4E1  | TEPP   | PSMB6    | PSMB3   | SAFB2  | C19orf79 |      |
|                | OLFM2   | COX6B1   | POLR2I | FBL    | ETFB   | PROCR  | ROMO1    | RPS21   | HSPA13 | NDUFV3   | GGA1 |
|                | NDUFB11 | HSD17B10 |        | COX7B  |        |        |          |         |        |          |      |

GOBPID Pvalue OddsRatio ExpCount Count Size Term

STable4\_20PerPair

|                                                        |          |             |             |    |     |     |
|--------------------------------------------------------|----------|-------------|-------------|----|-----|-----|
| GO:0022904                                             | 2.98E-14 | 45.1804878  | 0.345443222 | 11 | 96  |     |
| respiratory electron transport chain                   |          |             |             |    |     |     |
| GO:0022900                                             | 1.26E-12 | 31.13940115 | 0.482181164 | 11 | 134 |     |
| electron transport chain                               |          |             |             |    |     |     |
| GO:0045333                                             | 2.39E-12 | 29.22137405 | 0.510968099 | 11 | 142 |     |
| cellular respiration                                   |          |             |             |    |     |     |
| GO:0006120                                             | 2.89E-09 | 62.47391304 | 0.129541208 | 6  | 36  |     |
| "mitochondrial electron transport, NADH to ubiquinone" |          |             |             |    |     |     |
| GO:0015980                                             | 9.26E-09 | 12.78287739 | 1.104698637 | 11 | 307 |     |
| energy derivation by oxidation of organic compounds    |          |             |             |    |     |     |
| GO:0042773                                             | 1.55E-08 | 45.6776246  | 0.169123244 | 6  | 47  | ATP |
| synthesis coupled electron transport                   |          |             |             |    |     |     |
| GO:0042775                                             | 1.55E-08 | 45.6776246  | 0.169123244 | 6  | 47  |     |
| mitochondrial ATP synthesis coupled electron transport |          |             |             |    |     |     |
| GO:0006119                                             | 5.66E-08 | 35.98745819 | 0.20870528  | 6  | 58  |     |

STable4\_20PerPair

oxidative phosphorylation

GO:0006091 2.74E-07 8.995847225 1.540101031 11 428  
 generation of precursor metabolites and energy

Tissue: Thyroid=>Heart\_Left\_Ventricle Type: asymmetric

SourceGene: ENOSF1(ENSG00000132199.11) enolase superfamily member 1

TargetGeneSet: KLHL17 CPSF3L TAS1R3 TNFRSF14 RP1 HP1BP3 NUDC RP11  
 GPBP1L1 RPAP2 PRPF38B CCT3 USP21 CACYBP TMEM183A ZC3H11A TMEM81  
 INTS7 MTR SMC6 SLC5A6 ASB3 CCT4 AFTPH C2orf42 SPR PCGF1 AUP1  
 MRPS5 ARL6IP6 DNAJC10 HSPD1 ILKAP CRELD1 GHRLOS CHCHD4 NGLY1 ABHD14A-ACY1  
 CBLB SLC9C1 TPRA1 FXR1 DCUN1D1 PGM2 NUDT10 PLK4 CTSO PPID CCT5  
 MEF2C BRD8 WDR55 PCDHB16 ZNF300P1 SNRNP48 GNL1 CNPY3 HSP90AB1  
 VIP TCP1 PARK2 NUPL2 RP9 PSPH STYXL1 MAGI2 FAM133B THAP1  
 C8orf44 PYCRL DNAJA1 GNE FAM95B1 GKAP1 NCBP1 FAM73B RP11-88G17 WAC  
 HNRNPH3 DNA2 ANXA7 KIAA0913 C10orf131 PPP2R2D HTATIP2 NXF1  
 STIP1 EIF1AD ANO1 CAPN5 CHORDC1 MED17 ZBTB44 RAD52 FKBP4 RP4  
 IFFO1 REP15 PTGES3 SIRT4 ZCCHC8 C12orf65 HSPH1 SUGT1 PCID2  
 ACIN1 DHRS1 TRIM9 ZC2HC1C AHSA1 SMEK1 PAPOLA HSP90AA1 EHD4  
 DTWD1 ANKDD1A DPP8 C15orf42 SPNS3 C17orf108 COASY HOXB-AS1  
 MRC2 QRICH2 JMJD6 CIRBP SAFB PEX11G SAMD1 ZNF91 DPY19L3 DEDD2 KPTN  
 TRPM4 TFPT SLC23A2 RRBP1 DDX27 RNF114 STMN3 MORC3 THAP7-AS1  
 TRIOBP RANGAP1 CYB5R3 ARSD GPR173 GDPD2

| GOBPID                                  | Pvalue   | OddsRatio | STable4_20PerPair<br>ExpCount | Count       | Size | Term |
|-----------------------------------------|----------|-----------|-------------------------------|-------------|------|------|
| GO:0006457<br>protein folding           | 1.86E-10 |           | 10.44332791                   | 1.733859248 | 15   | 216  |
| GO:0006458<br>'de novo' protein folding | 3.15E-06 |           | 17.32121212                   | 0.409383434 | 6    | 51   |

Tissue: Heart\_Left\_Ventricle=>Thyroid Type: asymmetric

SourceGene: ENSG00000233038.1

TargetGeneSet: FCRL5 LIN9 IGKJ5 IGKC IGKJ3 IGKJ2 IGKV1-16  
IGKV2-28 IGKV1-39 MST1 RP11 KCNMB2-IT1 TMPRSS11CP IGJ  
C7orf50 BMPER PCLO IL18 MEG3 IGHA2 IGHG2 IGHGP IGHG1 IGHG3  
IGHV3-43 SNORA10 TGIF1 IGLV3-21 IGLV2-8 IGLC3 ASMT MAMLD1

| GOBPID     | Pvalue               | OddsRatio | ExpCount         | Count | Size | Term                                                           |
|------------|----------------------|-----------|------------------|-------|------|----------------------------------------------------------------|
| GO:0006958 | 1.71372213274009e-09 |           | 145.353535353535 |       |      | 0.0553594906926856                                             |
| 5          | 50                   |           |                  |       |      | complement activation, classical pathway                       |
| GO:0006956 | 5.63834339914804e-09 |           | 112.672413793103 |       |      | 0.0697529582727839                                             |
| 5          | 63                   |           |                  |       |      | complement activation                                          |
| GO:0002455 | 6.61742347366508e-09 |           | 108.901515151515 |       |      | 0.0719673379004913                                             |
| 5          | 65                   |           |                  |       |      | humoral immune response mediated by circulating immunoglobulin |
| GO:0072376 | 2.16244266875052e-08 |           | 84.7579693034238 |       |      | 0.0907895647360044                                             |
| 5          | 82                   |           |                  |       |      | protein activation cascade                                     |
| GO:0002460 | 2.5644627071602e-08  |           | 48.8914285714286 |       |      | 0.200401356307522                                              |



Stable4\_20PerPair

|                                       |     |                                                                                                                           |                      |                  |                   |  |   |
|---------------------------------------|-----|---------------------------------------------------------------------------------------------------------------------------|----------------------|------------------|-------------------|--|---|
| 6                                     | 181 | adaptive immune response based on somatic recombination of immune receptors built from immunoglobulin superfamily domains |                      |                  |                   |  |   |
| GO:0002250                            |     |                                                                                                                           | 4.38173798530615e-08 | 44.509375        | 0.219223583143035 |  | 6 |
| 198                                   |     | adaptive immune response                                                                                                  |                      |                  |                   |  |   |
| GO:0016064                            |     |                                                                                                                           | 9.97147565448117e-08 | 61.4451114922813 | 0.122898069337762 |  |   |
| 5                                     | 111 | immunoglobulin mediated immune response                                                                                   |                      |                  |                   |  |   |
| GO:0019724                            |     |                                                                                                                           | 1.13997696105075e-07 | 59.7414512093411 | 0.126219638779323 |  |   |
| 5                                     | 114 | B cell mediated immunity                                                                                                  |                      |                  |                   |  |   |
| GO:0006959                            |     |                                                                                                                           | 1.60147054710837e-07 | 55.6254856254856 | 0.135077157290153 |  |   |
| 5                                     | 122 | humoral immune response                                                                                                   |                      |                  |                   |  |   |
| GO:0002449                            |     |                                                                                                                           | 7.64940235407775e-07 | 40.0476992143659 | 0.18490069891357  |  |   |
| 5                                     | 167 | lymphocyte mediated immunity                                                                                              |                      |                  |                   |  |   |
| GO:0002443                            |     |                                                                                                                           | 2.42520447463488e-06 | 31.3967343336275 | 0.233617050723133 |  |   |
| 5                                     | 211 | leukocyte mediated immunity                                                                                               |                      |                  |                   |  |   |
| GO:0002253                            |     |                                                                                                                           | 1.32836322946249e-05 | 21.8630179344465 | 0.33104975434226  |  |   |
| 5                                     | 299 | activation of immune response                                                                                             |                      |                  |                   |  |   |
| Tissue: Thyroid=>Heart_Left_Ventricle |     | Type: asymmetric                                                                                                          |                      |                  |                   |  |   |

SourceGene: FAAH2(ENSG00000165591.6) fatty acid amide hydrolase 2

TargetGeneSet: PLA2G2A ASAP3 PDIK1L PTPRU GPBP1L1 YIPF1 GNG12 CYR61 RP11  
 BNIPL CREB3L4 PYG02 FAM189B USP21 HSD17B7 DPT PRRX1 LAMC1 ZC3H11A  
 ITPKB-IT1 KLHL29 C2orf44 ARHGEF33 HTRA2 LOXL3 SEMA4F PROM2  
 FBLN7 COL3A1 COL5A2 FN1 B3GNT7 CRELD1 C3orf45 TNNC1 VGLL3 EPHA3  
 ABI3BP BZW1P2 COL6A6 ECT2 ST6GAL1 BCL6 SPON2 11-Sep UNC5C CXXC4 ARSJ  
 LPCAT1 SLC38A9 LHFPL2 LOX GRAMD3 PHF15 H2AFJ ZNF354B ID4 ZNRD1-AS1  
 TMEM63B TDRD6 EYS KIAA1009 PM20D2 CASP8AP2 TCF21 FNDC1  
 WDR27 LFNG VWC2 GS1 COL1A2 SLC12A9 ZYX INTS9 PPP2CB PLAT GDF6  
 IGHEP2 TYRP1 IL11RA RG9MTD3 OGN OMD ECM2 KIAA1958 COL5A1  
 ITGB1 NAMPTL ZNF37BP DNAJC12 INSC SLC39A13 MEN1 EFEMP2 PICALM  
 AMOTL1 KBTBD3 TAGLN DPAGT1 PUS3 RAD52 EMP1 FAR2 C12orf35

STable4\_20PerPair

|         |         |           |          |         |          |          |         |          |          |     |  |
|---------|---------|-----------|----------|---------|----------|----------|---------|----------|----------|-----|--|
| LIMA1   | GLI1    | GLIPR1    | NUDT4    | CMKLR1  | TMEM119  | DTX1     | CCDC169 | RPS4XP16 |          |     |  |
| GPR180  | ADPRHL1 | ARHGGEF40 |          | LRFN5   | FRMD6    | ABCD4    | GPR176  | BAHD1    | GLDN     | CTD |  |
| ANKDD1A | LRRK1   | VASN      | CDH11    | HSD11B2 | FTSJD1   | TXNL4B   | CENPN   | CDK10    | SERPINF2 |     |  |
| NLGN2   | MFAP4   | RAB34     | MLLT6    | STAT3   | PTRF     | C17orf53 |         | COPZ2    | COL1A1   |     |  |
| RNF43   | KCNJ2   | ENGASE    | ACTG1    | WDR45L  | ARHGAP28 |          | ZADH2   | POLR2E   | PNPLA6   |     |  |
| ZNF558  | OLFM2   | COL5A3    | TPM4     | TSHZ3   | ANKRD27  | PSMC4    | LYPD5   | ZNF233   | ZFP112   |     |  |
| ZNF577  | ZNF211  | DDRKG1    | SLC24A3  | EMILIN3 | PCMTD2   | C21orf2  | COL6A1  | COL6A2   | GPM6B    |     |  |
| PPP1R3F | SPIN4   | PLS3      | KIAA1210 |         | PGRMC1   | LAMP2    | SRPK3   | VAMP7    |          |     |  |

|        |        |           |          |       |      |      |
|--------|--------|-----------|----------|-------|------|------|
| GOBPID | Pvalue | OddsRatio | ExpCount | Count | Size | Term |
|--------|--------|-----------|----------|-------|------|------|

|                              |          |  |             |             |   |    |
|------------------------------|----------|--|-------------|-------------|---|----|
| GO:0030199                   | 1.51E-11 |  | 41.86523438 | 0.312850322 | 9 | 33 |
| collagen fibril organization |          |  |             |             |   |    |

|                                   |          |  |             |             |    |     |
|-----------------------------------|----------|--|-------------|-------------|----|-----|
| GO:0030198                        | 3.15E-11 |  | 11.93128228 | 1.526330358 | 15 | 161 |
| extracellular matrix organization |          |  |             |             |    |     |

STable4\_20PerPair

|                                      |          |            |             |    |     |
|--------------------------------------|----------|------------|-------------|----|-----|
| GO:0043062                           | 3.44E-11 | 11.8492807 | 1.535810671 | 15 | 162 |
| extracellular structure organization |          |            |             |    |     |

|                         |          |             |             |    |     |
|-------------------------|----------|-------------|-------------|----|-----|
| GO:0031589              | 6.19E-08 | 7.835168117 | 1.915023182 | 13 | 202 |
| cell-substrate adhesion |          |             |             |    |     |

|                                       |          |            |             |   |    |
|---------------------------------------|----------|------------|-------------|---|----|
| GO:0010810                            | 2.55E-07 | 11.7703125 | 0.891149401 | 9 | 94 |
| regulation of cell-substrate adhesion |          |            |             |   |    |

|                             |          |             |             |   |    |
|-----------------------------|----------|-------------|-------------|---|----|
| GO:0070208                  | 1.55E-06 | 71.71929825 | 0.094803128 | 4 | 10 |
| protein heterotrimerization |          |             |             |   |    |

STable4\_20PerPair

|                           |          |             |             |   |    |      |
|---------------------------|----------|-------------|-------------|---|----|------|
| GO:0043588<br>development | 8.25E-06 | 14.52315522 | 0.483495952 | 6 | 51 | skin |
|---------------------------|----------|-------------|-------------|---|----|------|

|                                                        |          |             |             |   |    |  |
|--------------------------------------------------------|----------|-------------|-------------|---|----|--|
| GO:0071230<br>cellular response to amino acid stimulus | 1.84E-05 | 18.03535354 | 0.331810947 | 5 | 35 |  |
|--------------------------------------------------------|----------|-------------|-------------|---|----|--|

Tissue: Thyroid=>Heart\_Left\_Ventricle Type: asymmetric

STable4\_20PerPair

SourceGene: HIST1H2BD(ENSG00000158373.7) "histone cluster 1, H2bd"

|                |          |         |            |          |           |           |         |          |          |      |
|----------------|----------|---------|------------|----------|-----------|-----------|---------|----------|----------|------|
| TargetGeneSet: | KLHL17   | MXRA8   | TNFRSF14   | RP13     | RP11      | ZBTB17    | HP1BP3  | RCC1     |          |      |
| IP013          | GPBP1L1  | LEPROT  | SLC35D1    | RPAP2    | CEPT1     | RP4       | APH1A   | GOLPH3L  | BNIPL    |      |
| S100A9         | DENND4B  | FAM189B | CCT3       | KIRREL   | USP21     | B4GALT3   | HSD17B7 | CACYBP   | TMEM183A |      |
| ZC3H11A        | TMEM81   | INTS7   | CAPN2      | ARF1     | MTR       | ZNF672    | ZNF692  | SMC6     | CCT4     |      |
| AFTPH          | C2orf42  | SPR     | PCGF1      | LMAN2L   | DNAJC10   | COL5A2    | HSPD1   | ICA1L    | IKZF2    |      |
| SLC23A3        | FBXO36   | COL6A3  | CRELD1     | CHCHD4   | PLCL2     | NGLY1     | ZNF619  | RBM6     | MANF     |      |
| PPP4R2         | CPOX     | MSL2    | MYNN       | FXR1     | EIF4A2    | PPP1R2    | APBB2   | SRP72    | TBCK     | GLRB |
| PPID           | SH3RF1   | LPCAT1  | CCT5       | FAM105B  | GPBP1     | P4HA2-AS1 | P4HA2   | WDR55    |          |      |
| PCDHB16        | ZNF300P1 |         | PDLIM7     | ZNF354A  | ZNF879    | SNRNP48   | ZNF184  | SCAND3   | GNL1     |      |
| SLC39A7        | RP1      | TOMM6   | CNPY3      | HSP90AB1 |           | TDRD6     | BAI3    | RARS2    | PM20D2   |      |
| C6orf203       |          | VNN2    | VIP        | SERAC1   | FNDC1     | PNLDC1    | ZNF92   | STYXL1   | RBM48    |      |
| SLC25A13       |          | GIMAP4  | SLC39A14   |          | KIF13B    | GTF2E2    | GINS4   | THAP1    | GSDMD    |      |
| PYCR1          | ZNF623   | NRBP2   | DNAJA1     | NOL6     | RECK      | GKAP1     | OGN     | NCBP1    | COL15A1  | COQ4 |
| C9orf114       |          | CCBL1   | RP11-88G17 |          | COL5A1    | MAMDC4    | NUDT5   | WAC      | ITGB1    | PBLD |
| DNA2           | C10orf32 |         | DCHS1      | ZNF143   | HTATIP2   | C11orf46  |         | STIP1    | GPR137   |      |
| SLC25A45       |          | RBM14   | RBM4B      | EED      | CHORDC1   | MED17     | SRSF8   | DPAGT1   | HSPA8    |      |
| ZBTB44         | RAD52    | FKBP4   | EMP1       | REP15    | C12orf35  |           | LIMA1   | DAZAP2   | PAN2     |      |
| PTGES3         | ARHGAP9  | MRPL42  | HSP90B1    | SELPLG   | C12orf65  |           | HSPH1   | RPS4XP16 |          |      |
| SUGT1          | COL4A2   | PCID2   | ACIN1      | LRFN5    | MLH3      | ZC2HC1C   | AHSA1   | SERPINA1 |          |      |
| PAPOLA         | HSP90AA1 |         | ZFYVE19    | TRIM69   | PIGB      | ANKDD1A   | IGDCC4  | LOXL1    | WDR61    |      |
| DNASE1L2       |          | TBC1D24 | PRKCB      | FUS      | C16orf58  |           | CENPN   | CDK10    | RNF167   |      |
| C17orf108      |          | SDF2    | RAB34      | DHRS13   | CCT6B     | ARHGAP23  |         | KAT2A    | SCRN2    |      |
| KCNJ2          | HN1      | QRICH2  | JMJD6      | HEXDC    | VPS4B     | ATP9B     | ABCA7   | CIRBP    | GIPC3    |      |
| C19orf59       |          | WDR83   | SAMD1      | PRKACA   | DPY19L3   | DEDD2     | CD177   | ZNF233   | ZFP112   | KPTN |
| PIH1D1         | CTU1     | FPR2    | ZNF577     | ZNF761   | ZNF580    | TRIM28    | PTPRA   | DDRKG1   | PYGB     |      |
| IFT52          | RP3      | RNF114  | STMN3      | MORC3    | THAP7-AS1 |           | PRR14L  | MYH9     | TRIOBP   |      |

| STable4_20PerPair |        |           |          |        |          |       |
|-------------------|--------|-----------|----------|--------|----------|-------|
| RANGAP1           | LMF2   | ASMTL     | PPP1R3F  | GPR173 | KIAA1210 | HPRT1 |
| GOBPID            | Pvalue | OddsRatio | ExpCount | Count  | Size     | Term  |

|                 |          |  |             |             |    |     |
|-----------------|----------|--|-------------|-------------|----|-----|
| GO:0006457      | 1.36E-09 |  | 6.942193676 | 3.019306622 | 18 | 216 |
| protein folding |          |  |             |             |    |     |

Tissue: Thyroid=>Heart\_Left\_Ventricle Type: asymmetric

STable4\_20PerPair

SourceGene: MIA(ENSG00000261857.1) melanoma inhibitory activity

|                |         |          |         |         |         |          |             |          |
|----------------|---------|----------|---------|---------|---------|----------|-------------|----------|
| TargetGeneSet: | FAM41C  | KLHL17   | UBE2J2  | CPSF3L  | RP11    | TNFRSF14 | HP1BP3      | NUDC     |
| EYA3           | SLFNL1  | RNF220   | GPBP1L1 | RP1     | LEPROT  | SLC35D1  | FPGT-TNNI3K | TYW3     |
| WDR63          | CCBL2   | RPAP2    | CNN3    | CEPT1   | PTGFRN  | GDAP2    | RP4         | APH1A    |
| SNX27          | FAM189B | CLK2     | PMF1    | TMEM79  | CCT3    | USP21    | HSD17B7     | ADCY10   |
| LAMC1          | SMG7    | SWT1     | TMEM81  | INTS7   | JMJD4   | TFB2M    | ZNF692      | SMC6     |
| SLC5A6         | LTBP1   | CDC42EP3 |         | EML4    | CCDC88A | XPO1     | CCT4        | AFTPH    |
| PCGF1          | ELMOD3  | MRPS5    | LMAN2L  | RFX8    | METAP1D | HSPD1    | ALS2CR12    |          |
| SLC23A3        | RBM44   | ILKAP    | CRELD1  | C3orf19 | NGLY1   | SLC25A38 | CPOX        | KIAA1524 |
| WDR52          | SEMA5B  | SIAH2    | FXR1    | PARL    | POLR2H  | MAGEF1   | EIF4A2      | BCL6     |
| CEP19          | ABCA11P | NOP14    | DCAF16  | PARM1   | HELQ    | UBE2D3   | TBCK        | SEC24D   |
| CPE            | SH3RF1  | DCTD     | ENPP6   | CCT5    | CTD     | PPWD1    | BRD8        | SOX9     |
|                |         |          |         |         |         |          |             | CTSO     |
|                |         |          |         |         |         |          |             | PPID     |
|                |         |          |         |         |         |          |             | PCDHB16  |

Stable4\_20PerPair

|            |          |         |          |           |        |          |          |           |          |      |
|------------|----------|---------|----------|-----------|--------|----------|----------|-----------|----------|------|
| PCDHGA2    | NDST1    | FNDC9   | ADRA1B   | ZNRD1-AS1 | GNL1   | VWA7     | HLA-DRA  | HLA-DMB   |          |      |
| HLA-DMA    | SLC39A7  | SPDEF   | HSP90AB1 | SLC35B2   | BAI3   | COL12A1  | SENP6    | SNX3      | RP3      |      |
| RSPH4A     | FUCA2    | C6orf97 | TCP1     | PNLDC1    | CDK13  | PSPH     | STYXL1   | MAGI2     | RBM48    | TAF6 |
| STAG3      | CLDN15   | TMEM168 | ST7-AS1  | DYNLL1    | LZTS1  | POLR3D   | ADAM28   | KIF13B    | DCTN6    |      |
| GTF2E2     | TTI2     | THAP1   | RB1CC1   | ZNF623    | SCRIB  | CYHR1    | MTND4P14 |           | DNAJA1   | GNE  |
| GKAP1      | NOL8     | NCBP1   | COL15A1  | NIPSNAP3B |        | DAB2IP   | PRPS1P2  | ZBTB34    | FPGS     |      |
| RP11-88G17 |          | QSOX2   | CDNF     | ZNF37BP   | ERCC6  | ANXA7    | FGFBP3   | C10orf131 |          |      |
| FRAT2      | C10orf62 |         | C10orf2  | C10orf32  |        | TAF5     | BAG3     | C10orf125 |          |      |
| AP2A2      | PRKCDBP  | WT1-AS  | PIGCP1   | NXF1      | STIP1  | SLC25A45 |          | CFL1      | EFEMP2   |      |
| EIF1AD     | ZDHHC24  | RBM14   | RBM4B    | ANO1-AS1  |        | CAPN5    | ANKRD42  | EED       | CHORDC1  |      |
| MED17      | TMPRSS5  | PHLDB1  | HINFP    | ZNF202    | SRPR   | KCNJ5    | RAD52    | FKBP4     | TAPBPL   |      |
| C12orf71   |          | REP15   | PAN2     | PTGES3    | AVIL   | CRADD    | APPL2    | PLBD2     | SIRT4    |      |
| HSPH1      | FAM48A   | LHFP    | RPS4XP16 |           | DHRS12 | SUGT1    | ACIN1    | NEDD8     | CTSG     |      |
| RPL32P29   |          | SLC38A6 | SNAPC1   | EIF2B2    | POMT2  | AHSA1    | ZC3H14   | PAPOLA    | VRK1     |      |
| HSP90AA1   |          | ATPBD4  | EHD4     | TMEM87A   | PIGB   | POLR2M   | DPP8     | NPTN      | WDR61    | PRC1 |
| SOLH       | TPSAB1   | TBC1D24 | PDPK1    | CLDN9     | NPIP   | NPIPP1   | ATXN2L   | GDPD3     | CTF1     |      |
| HERPUD1    | TSNAXIP1 |         | SLC7A6OS |           | AARS   | BANP     | CDK10    | DERL2     | TRIM16   |      |
| TRPV2      | LGALS9   | NUFIP2  | ANKRD13B |           | CCT6B  | TBC1D3   | KAT2A    | NAGLU     | COASY    | NMT1 |
| CUEDC1     | DDX42    | HELZ    | NT5C     | RECQL5    | QRICH2 | JMJD6    | LRRC45   | CXXC1     | ATP9B    |      |
| APBA3      | SAFB2    | SAFB    | PNPLA6   | ZNF558    | TRMT1  | SAMD1    | DEDD2    | ZNF284    | PPP1R37  | KPTN |
| KCNJ14     | IRF3     | ZNF137P | MYADM    | ZNF580    | ZNF667 | SLC23A2  | CRNKL1   | ZNF337    | MT1P3    |      |
| EPB41L1    | PLCG1    | PKIG    | PABPC1L  | DDX27     | RNF114 | C20orf11 |          | C21orf2   | C21orf67 |      |
| THAP7-AS1  |          | TFIP11  | TPST2    | PRR14L    | TRIOBP | ST13     | CYB5R3   | ACR       | ARSD     |      |
| HDHD1      | ZNF673   | RP6     | ACRC     | RAB9B     | SLC6A8 |          |          |           |          |      |

| GOBPID | Pvalue | OddsRatio | ExpCount | Count | Size | Term |
|--------|--------|-----------|----------|-------|------|------|
|--------|--------|-----------|----------|-------|------|------|

|                 |          |  |             |             |    |     |
|-----------------|----------|--|-------------|-------------|----|-----|
| GO:0006457      | 1.63E-10 |  | 6.586630836 | 3.736765622 | 21 | 216 |
| protein folding |          |  |             |             |    |     |



STable4\_20PerPair

|                              |          |             |             |    |     |
|------------------------------|----------|-------------|-------------|----|-----|
| GO:0006986                   | 1.47E-05 | 5.492979221 | 2.231679469 | 11 | 129 |
| response to unfolded protein |          |             |             |    |     |

Tissue: Thyroid=>Heart\_Left\_Ventricle Type: asymmetric

STable4\_20PerPair

SourceGene: NUDT3(ENSG00000112664.4)  
moiety X)-type motif 3

nudix (nucleoside diphosphate linked

STable4\_20PerPair

|                |          |          |          |           |           |          |           |          |           |      |
|----------------|----------|----------|----------|-----------|-----------|----------|-----------|----------|-----------|------|
| TargetGeneSet: | FAM41C   | KLHL17   | C1orf159 |           | CPSF3L    | TAS1R3   | DVL1      | TNFRSF14 |           |      |
| RP13           | KLHL21   | RP11     | NMNAT1   | ZBTB17    | RSG1      | HP1BP3   | CDC42     | ZBTB40   | FUCA1     |      |
| UBXN11         | PIGV     | NUDC     | EYA3     | RCC1      | CITED4    | RNF220   | GPBP1L1   | RP1      | LEPROT    |      |
| SLC35D1        | TYW3     | CCBL2    | KIAA1107 |           | RPAP2     | ALG14    | RP4       | FRRS1    | C1orf194  |      |
| CEPT1          | APH1A    | GOLPH3L  | BNIPL    | PSMB4     | SNX27     | FAM189B  | SMG5      | CCT3     | USP21     |      |
| B4GALT3        | HSD17B7  | METTL13  | CACYBP   | CEP350    | TRMT1L    | GS1      | TMEM183A  |          | ZC3H11A   |      |
| TMEM81         | INTS7    | TARBP1   | IRF2BP2  | MTR       | ZNF692    | SMC6     | C2orf44   | SLC5A6   | LTBP1     |      |
| ARHGEF33       |          | EML4     | CCDC88A  | BCL11A    | XPO1      | CCT4     | AFTPH     | C2orf42  | SPR       |      |
| PCGF1          | AUP1     | HTRA2    | GCFC2    | ELMOD3    | RNF181    | RNF103   | RMND5A    | MRPS5    | LMAN2L    | RFX8 |
| HS6ST1         | ARL6IP6  | DNAJC10  | HIBCH    | HSPD1     | SATB2     | ALS2CR12 |           | TRAK2    | IKZF2     |      |
| XRCC5          | SLC23A3  | RBM44    | CRELD1   | CHCHD4    | C3orf19   | CAPN7    | PLCL2-AS1 |          | NGLY1     |      |
| ZNF619         | ZNF852   | KIAA1143 |          | RBM6      | MANF      | PPP4R2   | ZNF717    | CGGBP1   | CPOX      | CBLB |
| KIAA1524       |          | SLC9C1   | WDR52    | KLF15     | TPRA1     | PPM1L    | FXR1      | ATP11B   | DCUN1D1   | PARL |
| MAGEF1         | TBCCD1   | BCL6     | PPP1R2   | UBXN7     | ABCA11P   | HGFAC    | DCAF16    | CTD      | RASGEF1B  |      |
| NUDT10         | RG9MTD2  | UBE2D3   | SLC9B1   | TBCK      | PLK4      | GAB1     | CTSO      | PPID     | ANKRD37   |      |
| LPCAT1         | FAM134B  | NIPBL    | C5orf51  | TRIM23    | KLHL35    | BRD8     | SOX9      | WDR55    | PCDHB16   |      |
| TCERG1         | ZNF300P1 |          | RANBP17  | CREBRF    | PDLIM7    | ZNF354A  | SNRNP48   | GNL1     | DDX39B    |      |
| HLA-DRA        | HLA-DMB  | HLA-DMA  | SLC39A7  | SPDEF     | ARMC12    | TOMM6    | HSP90AB1  |          | TDRD6     | BAI3 |
| MTO1           | RARS2    | PM20D2   | UFL1     | SESN1     | RP3       | RSPH4A   | TRMT11    | HECA     | VIP       |      |
| SERAC1         | FNDC1    | PNLDC1   | WDR27    | C7orf50   | KLHL7-AS1 |          | ADCYAP1R1 |          | 7-Sep     |      |
| CDK13          | LANCL2   | PSPH     | STYXL1   | MAGI2     | CLDN12    | RBM48    | FAM200A   | STAG3    | ZCWPW1    |      |
| PRKAR2B        | ARF5     | ZYX      | C7orf29  | GBX1      | UBE3C     | ZNF596   | SLC39A14  |          | CHMP7     |      |
| ADAM28         | KIF13B   | GTF2E2   | TTI2     | GINS4     | THAP1     | MSC      | ZBTB10    | ENY2     | C8orf76   |      |
| PYCR1          | ZNF623   | NRBP2    | CYHR1    | ZNF250    | KDM4C     | TYRP1    | TOPORS    | DNAJA1   | GNE       |      |
| RG9MTD3        | GKAP1    | NOL8     | NCBP1    | GRIN3A    | CDC26     | ZBTB34   | FPGS      | C9orf114 |           |      |
| RP11-88G17     |          | RXRA     | FAM166A  | EXD3      | NOXA1     | USP6NL   | WAC       | ITGB1    | NELL1     |      |
| ZNF37BP        | ERCC6    | HNRNPH3  | DNA2     | P4HA1     | ANXA7     | KIAA0913 |           | KAT6B    | C10orf131 |      |
| FRAT2          | C10orf32 |          | TAF5     | MXI1      | FAM160B1  |          | ZRANB1    |          | C10orf125 |      |
| PRKCDP         | ZNF143   | HTATIP2  | DNAJC24  | PIGCP1    | ALKBH3    | CELFI1   | FADS3     | NXF1     | MARK2     |      |
| STIP1          | TRPT1    | GPR137   | MEN1     | SLC25A45  |           | CFL1     | EFEMP2    | EIF1AD   | CD248     |      |
| RBM14          | RBM4B    | CAPN5    | EED      | CHORDC1   | MED17     | IFT46    | PHLDB1    | DPAGT1   | HINFP     | OAF  |
| SRPR           | PRDM10   | ZBTB44   | RAD52    | CACNA2D4  |           | FKBP4    | IFFO1     | CDKN1B   | WBP11     |      |
| REP15          | FAR2     | C12orf35 |          | SAT2      | LIMA1     | DAZAP2   | PAN2      | PTGES3   | AVIL      |      |
| CTDSP2         | BBS10    | SELPLG   | ALKBH2   | DTX1      | SIRT4     | C12orf65 |           | ZNF605   | CRYL1     |      |
| PTPN2P2        | HSPH1    | RPS4XP16 |          | DHRS12    | SUGT1     | UGGT2    | PCID2     | ACIN1    | SEC23A    |      |
| FBXO33         | LRFN5    | RPL32P29 |          | MAPK1IP1L |           | MAX      | ABCD4     | ZC2HC1C  | C14orf118 |      |
| AHSA1          | PAPOLA   | VRK1     | HERC2P3  | FAN1      | ZFYVE19   | EHD4     | HAUS2     | PIGB     | POLR2M    |      |
| ANKDD1A        | IGDCC4   | LOXL1    | COMMD4   | WDR61     | POLG      | BLM      | WASH4P    | RHOT2    | TBC1D24   | NPIP |
| NIPIP1         | CLN3     | MAZ      | FUS      | C16orf58  |           | FTO      | HERPUD1   | HSD11B2  | TSNAXIP1  |      |

STable4\_20PerPair

|         |           |               |        |          |        |           |           |          |           |      |  |
|---------|-----------|---------------|--------|----------|--------|-----------|-----------|----------|-----------|------|--|
| TMEM231 | CENPN     | KLHDC4        | BANP   | CDK10    | RNMTL1 | SGSM2     | SPNS3     | PFN1     | DERL2     |      |  |
| EIF5A   | COX10-AS1 |               | MEIS3  | C17orf39 |        | MEIS3P2   | C17orf108 |          | SDF2      |      |  |
| RAB34   | RHOT1     | ARHGAP23      |        | KAT2A    | CCR10  | NMT1      | SCRN2     | SP2      | DDX42     | NT5C |  |
| RECQL5  | QRICH2    | JMJD6         | CHMP6  | ARHGDI1A | LRRC45 | ARHGAP28  |           | CABYR    | HNRNPA1P7 |      |  |
| ASXL3   | ZNF397    | RNF165        | CXXC1  | ZNF236   | ABCA7  | CIRBP     | SAFB2     | SAFB     | PRR22     |      |  |
| PNPLA6  | ZNF558    | COL5A3        | ZGLP1  | KEAP1    | WDR83  | SAMD1     | PRKACA    | SLC27A1  | ZNF91     |      |  |
| DPY19L3 | ZNF571    | FAM98C        | MED29  | EID2B    | DEDD2  | ZNF284    | ZNF233    | ZFP112   | TMEM160   | KPTN |  |
| FUT2    | TSKS      | ZNF577        | ZNF615 | ZNF808   | ZNF580 | ZNF667    | NSFL1C    | SNRPB    | PTPRA     |      |  |
| DDRGK1  | SLC23A2   | PYGB          | MT1P3  | MMP24    | TTI1   | IFT52     | C20orf111 |          | PKIG      | SYS1 |  |
| NCOA5   | RNF114    | C20orf166-AS1 |        | PCMTD2   | HSPA13 | LINC00478 |           | MORC3    | C21orf2   |      |  |
| SCARF2  | THAP7-AS1 |               | TFIP11 | TPST2    | PRR14L | TRIOBP    | H1F0      | RANGAP1  | PPPDE2    |      |  |
| ASMTL   | PPP1R3F   | MAGED1        | GPR173 | RP6      | MAGEC2 | ARMCX4    | BEX4      | KIAA1210 |           |      |  |
| FAM127C | VAMP7     | TMSB4Y        |        |          |        |           |           |          |           |      |  |

|        |        |           |          |       |      |      |
|--------|--------|-----------|----------|-------|------|------|
| GOBPID | Pvalue | OddsRatio | ExpCount | Count | Size | Term |
|--------|--------|-----------|----------|-------|------|------|

|                   |          |     |             |   |   |           |
|-------------------|----------|-----|-------------|---|---|-----------|
| GO:0035511        | 1.67E-05 | Inf | 0.076811293 | 3 | 3 | oxidative |
| DNA demethylation |          |     |             |   |   |           |

STable4\_20PerPair

Tissue: Thyroid=>Heart\_Left\_Ventricle Type: asymmetric

SourceGene: PLD5(ENSG00000180287.11) "phospholipase D family, member 5"

|                |        |           |        |        |        |          |        |         |       |
|----------------|--------|-----------|--------|--------|--------|----------|--------|---------|-------|
| TargetGeneSet: | PODN   | RP11      | BNIPL  | TKT    | FMOD   | NID1     | RHOB   | IL1R1   |       |
| SCN7A          | COL5A2 | COL4A4    | COL6A3 | CLSTN2 | PDGFRA | 11-Sep   | SPOCK1 | C5orf62 | SNX14 |
| EPB41L2        | SASH1  | KIAA1324L |        | INTS9  | RECK   | SVEP1    | OR2K2  | SPON1   | EMP1  |
| PTPRQ          | LIG4   | AKAP5     | FBLN5  | MMP2   | SF3B3  | CRISPLD2 |        | ASGR1   | KCNJ2 |
| SETBP1         | DSEL   | MN1       | CHRDL1 |        |        |          |        |         |       |

|        |        |           |          |       |      |      |
|--------|--------|-----------|----------|-------|------|------|
| GOBPID | Pvalue | OddsRatio | ExpCount | Count | Size | Term |
|--------|--------|-----------|----------|-------|------|------|

STable4\_20PerPair

GO:0030198 8.73E-11 33.78552632 0.378797315 9 161  
extracellular matrix organization

GO:0043062 9.23E-11 33.56235294 0.381150093 9 162  
extracellular structure organization

Tissue: Thyroid=>Heart\_Left\_Ventricle Type: asymmetric

SourceGene: PTPLB(ENSG00000206527.5) "protein tyrosine phosphatase-like  
(proline instead of catalytic arginine), member b"

TargetGeneSet: FAM41C TAS1R3 TNFRSF14 RP1 WRAP73 ZBTB17 FBXO42  
HP1BP3 FUCA1 PNR2 NUDC EYA3 RCC1 RP11 GPBP1L1 LEPROT TYW3  
CCBL2 RP4 ZNF326 RPAP2 ALG14 PRPF38B SNX27 JTB CCT3 USP21

Stable4\_20PerPair

|            |           |          |            |          |           |          |           |           |             |
|------------|-----------|----------|------------|----------|-----------|----------|-----------|-----------|-------------|
| HSD17B7    | CACYBP    | TMEM183A |            | TMEM81   | INTS7     | MTR      | ZNF672    | ZNF692    | THADA       |
| CCDC88A    | CCT4      | AFTPH    | C2orf42    | PCGF1    | AUP1      | ELMOD3   | MRPS5     | ANKRD36C  |             |
| LMAN2L     | MTND3P10  |          | WDSUB1     | HSPD1    | SLC23A3   | CRELD1   | CHCHD4    | PLCL2-AS1 |             |
| NGLY1      | DHX30     | MANF     | FRMD4B     | KIAA1524 |           | WDR52    | TPRA1     | MYNN      | FXR1        |
| EIF2B5     | EIF4A2    | ABCA11P  | NOP14      | DCAF16   | CHIC2     | NUDT10   | UBE2D3    | TBCK      | PLK4        |
| GUSBP5     | PPID      | CCT5     | SOX9       | WDR55    | PCDHB16   | PCDHGA2  | ZNF300P1  |           | FNDC9       |
| ZNF184     | GNL1      | SLC39A7  | SPDEF      | HSP90AB1 |           | SLC35B2  | RP3       | RSPH4A    | C6orf97 VIP |
| TCP1       | PNLDC1    | C6orf70  | HOXA10     | STYXL1   | MAGI2     | RBM48    | FAM133B   | SLC25A13  |             |
| TMEM168    | GBX1      | LZTS1    | TTI2       | GOLGA7   | GIN54     | THAP1    | EBAG9     | PYCRL     | ZNF623      |
| CYHR1      | UHRF2     | KDM4C    | DNAJA1     | NOL6     | C9orf100  |          | HMGB3P24  |           | GKAP1       |
| NCBP1      | RAB14     | FPGS     | RP11-88G17 | EXD3     | TAF3      | WAC      | ZNF32-AS2 |           | PBLD        |
| HNRNPH3    | C10orf131 |          | FRAT2      | TAF5     | BAG3      | BUB3     | PPP2R2D   | C10orf125 | CTD         |
| SLC22A18AS |           | PRG2     | FADS3      | NXF1     | STIP1     | SLC25A45 | EIF1AD    | ZDHHC24   |             |
| RBM14      | EED       | CHORDC1  | MED17      | HINFP    | HSPA8     | KCNJ5    | FKBP4     | ATF1      | PAN2        |
| PTGES3     | ALKBH2    | PLBD2    | HSPH1      | FANCB    | INTS6     | DHRS12   | SUGT1     | PCID2     | RPL32P29    |
| MAX        | EIF2B2    | POMT2    | AHSA1      | PAPOLA   | HSP90AA1  |          | TUBGCP5   | TMEM87A   | MFAP1 PIGB  |
| ANKDD1A    | PRC1      | DNASE1L2 |            | TBC1D24  | MGRN1     | NPIP     | NPIPP1    | PKD1P6    | BANP        |
| SGSM2      | DERL2     | CNTROB   | MEIS3      | MEIS3P2  | C17orf108 |          | UTP6      | CCT6B     | KRT19       |
| KAT2A      | NAGLU     | QRICH2   | JMJD6      | IMPACT   | ASXL3     | CIRBP    | SAFB      | YJEFN3    | DEDD2       |
| TRPM4      | NOSIP     | TSKS     | TFPT       | ZNF580   | TRIM28    | RRBP1    | POFUT1    | DDX27     | RNF114      |
| C20orf11   |           | STMN3    | MORC3      | C21orf67 |           | TPST2    | PRR14L    | TRIOBP    | RANGAP1     |
| C22orf26   |           | GTSE1    | ARSD       | GPR173   |           |          |           |           |             |

|        |        |           |          |       |      |      |
|--------|--------|-----------|----------|-------|------|------|
| GOBPID | Pvalue | OddsRatio | ExpCount | Count | Size | Term |
|--------|--------|-----------|----------|-------|------|------|

|            |          |             |             |    |     |                 |
|------------|----------|-------------|-------------|----|-----|-----------------|
| GO:0006457 | 8.80E-11 | 8.367201426 | 2.555947685 | 18 | 216 | protein folding |
|------------|----------|-------------|-------------|----|-----|-----------------|

STable4\_20PerPair

GO:0000226 1.90E-05 4.507318038 3.183101515 13 269  
 microtubule cytoskeleton organization

Tissue: Heart\_Left\_Ventricle=>Thyroid Type: asymmetric  
 SourceGene: RP11-135J2.4(ENSG00000228063.1)  
 TargetGeneSet: FCRL5 IGKJ5 IGKC IGKJ2 IGKV1-17 IGKV3D-20 AGA  
 UBTD2 MRPS17 ANKRD20A19P SLC39A2 RP11 IGHG1 IGHG3 IGHJ5 IGHJ3  
 IGHV3-73 SBK1 IGLV1-40 IGLV2-11 IGLV2-8 IGLL5 IGLC1  
 IGLC3

| GOBPID     | Pvalue               | OddsRatio                                                                                                                 | ExpCount         | Count              | Size | Term               |
|------------|----------------------|---------------------------------------------------------------------------------------------------------------------------|------------------|--------------------|------|--------------------|
| GO:0006958 | 5.73461135878179e-13 |                                                                                                                           | 392.618181818182 |                    |      | 0.0380596498512214 |
| 6          | 50                   | complement activation, classical pathway                                                                                  |                  |                    |      |                    |
| GO:0006956 | 2.44254125353039e-12 |                                                                                                                           | 302.8            | 0.0479551588125389 | 6    | 63                 |
| 6          | 50                   | complement activation                                                                                                     |                  |                    |      |                    |
| GO:0002455 | 2.96754069301776e-12 |                                                                                                                           | 292.494915254237 |                    |      | 0.0494775448065878 |
| 6          | 65                   | humoral immune response mediated by circulating immunoglobulin                                                            |                  |                    |      |                    |
| GO:0072376 | 1.25167763479958e-11 |                                                                                                                           | 226.8            | 0.062417825756003  | 6    | 82                 |
| 6          | 114                  | protein activation cascade                                                                                                |                  |                    |      |                    |
| GO:0016064 | 8.02400420274271e-11 |                                                                                                                           | 163.828571428571 |                    |      | 0.0844924226697114 |
| 6          | 111                  | immunoglobulin mediated immune response                                                                                   |                  |                    |      |                    |
| GO:0019724 | 9.44257001614251e-11 |                                                                                                                           | 159.244444444444 |                    |      | 0.0867760016607847 |
| 6          | 114                  | B cell mediated immunity                                                                                                  |                  |                    |      |                    |
| GO:0006959 | 1.42774536701093e-10 |                                                                                                                           | 148.179310344828 |                    |      | 0.0928655456369801 |
| 6          | 122                  | humoral immune response                                                                                                   |                  |                    |      |                    |
| GO:0002449 | 9.58785477132851e-10 |                                                                                                                           | 106.427329192547 |                    |      | 0.127119230503079  |
| 6          | 167                  | lymphocyte mediated immunity                                                                                              |                  |                    |      |                    |
| GO:0002460 | 1.55867569635427e-09 |                                                                                                                           | 97.8171428571429 |                    |      | 0.137775932461421  |
| 6          | 181                  | adaptive immune response based on somatic recombination of immune receptors built from immunoglobulin superfamily domains |                  |                    |      |                    |
| GO:0002250 | 2.67678847039623e-09 |                                                                                                                           | 89.05            | 0.150716213410837  | 6    | 198                |
| 6          | 211                  | adaptive immune response                                                                                                  |                  |                    |      |                    |
| GO:0002443 | 3.92363245231903e-09 |                                                                                                                           | 83.3268292682927 |                    |      | 0.160611722372154  |
| 6          | 211                  | leukocyte mediated immunity                                                                                               |                  |                    |      |                    |
| GO:0002253 | 3.16044752134614e-08 |                                                                                                                           | 57.9399317406143 |                    |      | 0.227596706110304  |
| 6          | 299                  | activation of immune response                                                                                             |                  |                    |      |                    |
| GO:0050778 | 1.01797558856702e-07 |                                                                                                                           | 47.2022346368715 |                    |      | 0.277074250916892  |
| 6          | 364                  | positive regulation of immune response                                                                                    |                  |                    |      |                    |
| GO:0002252 | 1.44141824975688e-07 |                                                                                                                           | 44.4             | 0.293820496851429  | 6    | 386                |
| 6          | 364                  | immune effector process                                                                                                   |                  |                    |      |                    |



STable4\_20PerPair

| Tissue: Heart_Left_Ventricle=>Thyroid |                                  | Type:                |                  |                   |         |                                                                                                                           |                   |          |         |
|---------------------------------------|----------------------------------|----------------------|------------------|-------------------|---------|---------------------------------------------------------------------------------------------------------------------------|-------------------|----------|---------|
| SourceGene:                           | RP11-175D17.3(ENSG00000236643.1) |                      |                  |                   |         |                                                                                                                           |                   |          |         |
| TargetGeneSet:                        | PLA2G2D                          | CCDC163P             | AMPD1            | RP11              | FCRL5   | IGKJ5                                                                                                                     | IGKC              |          |         |
| IGKJ4                                 | IGKJ3                            | IGKJ2                | IGKJ1            | IGKV4-1           | IGKV1-5 | IGKV1-12                                                                                                                  | IGKV1-16          |          |         |
| IGKV3-20                              |                                  | IGKV2-24             |                  | SP140             | EOMES   | CCR4                                                                                                                      | PARP15            | IGJ      | RP3     |
| NCF1C                                 | BLK                              | MS4A1                | IGHA2            | IGHG2             | IGHGP   | IGHA1                                                                                                                     | IGHG1             | IGHG3    | IGHD    |
| IGHJ5                                 | IGHV3-7                          | IGHV3-33             |                  | IGHV3-48          |         | IGHV4-59                                                                                                                  |                   | SCARNA15 | IGHM    |
| P2RX5                                 | TBC1D27                          | CCL4                 | CD79A            | IGLV1-51          |         | IGLV1-47                                                                                                                  |                   | IGLV1-44 | CD19    |
| IGLV1-40                              |                                  | IGLV3-25             |                  | IGLV2-23          |         | IGLV3-21                                                                                                                  |                   | IGLV2-14 |         |
| IGLV2-11                              |                                  | IGLV2-8              | IGLV3-1          | IGLL5             | IGLC1   | IGLC2                                                                                                                     | IGLC3             | IGLC7    | WAS     |
| GOBPID                                | Pvalue                           | OddsRatio            | ExpCount         | Count             | Size    | Term                                                                                                                      |                   |          |         |
| GO:0006958                            | 11                               | 3.1938931138853e-20  | 193.137973137973 |                   |         | complement activation, classical pathway                                                                                  | 0.110718981385371 |          |         |
| GO:0006956                            | 11                               | 5.17450829290118e-19 | 144.722527472527 |                   |         | complement activation                                                                                                     | 0.139505916545568 |          |         |
| GO:0002455                            | 65                               | 7.50120043233589e-19 | 139.3430335097   | 0.143934675800983 | 11      | humoral immune response mediated by circulating immunoglobulin                                                            |                   |          |         |
| GO:0072376                            | 11                               | 1.14709519640839e-17 | 105.853789403085 |                   |         | protein activation cascade                                                                                                | 0.181579129472009 |          |         |
| GO:0016064                            | 11                               | 3.72901390844983e-16 | 75.0042857142857 |                   |         | immunoglobulin mediated immune response                                                                                   | 0.245796138675524 |          |         |
| GO:0019724                            | 11                               | 5.04997115378365e-16 | 72.8044382801664 |                   |         | B cell mediated immunity                                                                                                  | 0.252439277558646 |          |         |
| GO:0002253                            | 14                               | 6.56781311201327e-16 | 38.5723196881092 |                   |         | activation of immune response                                                                                             | 0.66209950868452  |          |         |
| GO:0006959                            | 11                               | 1.08954706873963e-15 | 67.5195195195195 |                   |         | humoral immune response                                                                                                   | 0.270154314580306 |          |         |
| GO:0050778                            | 14                               | 1.00974770116133e-14 | 31.2644444444444 |                   |         | positive regulation of immune response                                                                                    | 0.806034184485503 |          |         |
| GO:0002449                            | 11                               | 3.68503467947307e-14 | 47.8916361416361 |                   |         | lymphocyte mediated immunity                                                                                              | 0.36980139782714  |          |         |
| GO:0002460                            | 11                               | 9.00267805846482e-14 | 43.9044817927171 |                   |         | adaptive immune response based on somatic recombination of immune receptors built from immunoglobulin superfamily domains | 0.400802712615044 |          |         |
| GO:0002250                            | 11                               | 2.42687592582153e-13 | 39.8655462184874 |                   |         | adaptive immune response                                                                                                  | 0.43844716628607  |          |         |
| GO:0002443                            | 11                               | 4.8856649306588e-13  | 37.2402380952381 |                   |         | leukocyte mediated immunity                                                                                               | 0.467234101446267 |          |         |
| GO:0002252                            | 12                               | 1.5521457949534e-11  | 22.5320855614973 |                   |         | immune effector process                                                                                                   | 0.854750536295066 |          |         |
| Tissue: Heart_Left_Ventricle=>Thyroid |                                  | Type:                | cluster          |                   |         |                                                                                                                           |                   |          |         |
| SourceGene:                           | RP11-236B18.3(ENSG00000225525.1) |                      |                  |                   |         |                                                                                                                           |                   |          |         |
| TargetGeneSet:                        | PLA2G2D                          | FCRL5                | CD84             | CHIT1             | IGKJ5   | IGKC                                                                                                                      | IGKJ3             | IGKJ2    |         |
| IGKJ1                                 | IGKV4-1                          | IGKV1-5              | IGKV1-6          | IGKV3-7           | IGKV1-9 | IGKV3-15                                                                                                                  | IGKV1-17          |          |         |
| IGKV3-20                              |                                  | IGKV2-24             |                  | IGKV2-28          |         | IGKV1-39                                                                                                                  | IGKV2D-28         |          |         |
| IGKV3D-20                             | LAP3                             | ICOS                 | CCDC51           | KLHL7             | IGJ     | RASSF6                                                                                                                    | CXCL13            | GZMK     | RP11    |
| TSPAN33                               | KIAA0196                         | ZBTB43               | TAF1D            | POU2AF1           | GS1     | FLT3                                                                                                                      | TRAV12-1          |          |         |
| IGHG1                                 | IGHG3                            | IGHM                 | IGHV1-2          | IGHV2-5           | IGHV3-7 | IGHV3-15                                                                                                                  | IGHV1-18          |          |         |
| IGHV3-21                              |                                  | IGHV3-22             |                  | IGHV3-23          |         | IGHV1-24                                                                                                                  | IGHV3-30          |          |         |
| IGHV1-46                              |                                  | IGHV3-48             |                  | IGHV5-51          |         | IGHV3-53                                                                                                                  | IGHV4-55          |          |         |
| IGHV4-59                              |                                  | IGHV4-61             |                  | IGHV2-70          |         | KREMEN2                                                                                                                   | CCL4L1            | MFSD11   | ANGPTL4 |
| FFAR2                                 | CD37                             | IGLV1-51             |                  | IGLV7-46          |         | IGLV1-44                                                                                                                  | IGLV1-40          |          |         |
| IGLV2-23                              |                                  | IGLV3-19             |                  | IGLV2-18          |         | IGLV2-11                                                                                                                  | IGLV3-10          |          |         |
| IGLV3-9                               | IGLV2-8                          | IGLV3-1              | IGLL5            | IGLC1             | IGLC2   | IGLC3                                                                                                                     | IGLC5             | IGLC6    | IGLC7   |
| GOBPID                                | Pvalue                           | OddsRatio            | ExpCount         | Count             | Size    | Term                                                                                                                      |                   |          |         |
| GO:0006959                            | 16                               | 4.5849197390771e-24  | 98.1612349914237 |                   |         | humoral immune response                                                                                                   | 0.320808248564113 |          |         |
| GO:0006958                            | 13                               | 9.45629359658127e-24 | 202.041081081081 |                   |         | complement activation, classical pathway                                                                                  | 0.131478790395128 |          |         |
| GO:0006956                            | 63                               | 2.73173090141433e-22 | 149.3752         | 0.165663275897862 | 13      | complement activation                                                                                                     |                   |          |         |
| GO:0002455                            |                                  | 4.27126034024078e-22 | 143.61           | 0.170922427513667 | 13      |                                                                                                                           |                   |          | 65      |

Stable4\_20PerPair

| GO:ID                                                      | Count                | Term                                                           | OddsRatio        | ExpCount | Count  | Size                                                                | Term              |                   |             |
|------------------------------------------------------------|----------------------|----------------------------------------------------------------|------------------|----------|--------|---------------------------------------------------------------------|-------------------|-------------------|-------------|
| GO:0072376                                                 | 1.128945768015e-20   | humoral immune response mediated by circulating immunoglobulin | 108.099710144928 |          |        |                                                                     | 0.215625216248011 |                   |             |
| GO:0016064                                                 | 7.25210199108449e-19 | protein activation cascade                                     | 75.9571428571429 |          |        |                                                                     | 0.291882914677185 |                   |             |
| GO:0019724                                                 | 1.04135872730982e-18 | immunoglobulin mediated immune response                        | 73.6855445544554 |          |        |                                                                     | 0.299771642100893 |                   |             |
| GO:0002460                                                 | 1.04693841228951e-17 | B cell mediated immunity                                       | 49.7614770459082 |          |        |                                                                     | 0.475953221230365 |                   |             |
| GO:0002250                                                 | 3.74836676948325e-17 | receptors built from immunoglobulin superfamily domains        | 45.1100543478261 |          |        |                                                                     | 0.520656009964708 |                   |             |
| GO:0002449                                                 | 1.72341146454477e-16 | adaptive immune response                                       | 48.1472727272727 |          |        |                                                                     | 0.439139159919729 |                   |             |
| GO:0002443                                                 | 3.71519761846452e-15 | lymphocyte mediated immunity                                   | 37.3323232323232 |          |        |                                                                     | 0.554840495467442 |                   |             |
| GO:0002253                                                 | 1.20494452304226e-14 | leukocyte mediated immunity                                    | 28.9169590643275 |          |        |                                                                     | 0.786243166562868 |                   |             |
| GO:0050778                                                 | 1.80555239275062e-13 | activation of immune response                                  | 23.4383333333333 |          |        |                                                                     | 0.957165594076534 |                   |             |
| GO:0002252                                                 | 4.02349071322156e-13 | positive regulation of immune response                         | 22.0176971326165 |          |        |                                                                     | 1.01501626185039  |                   |             |
| GO:0003762                                                 | 1.01501626185039e-13 | immune effector process                                        |                  |          |        |                                                                     |                   |                   |             |
| Tissue: Heart_Left_Ventricle=>Thyroid Type: asymmetric     |                      |                                                                |                  |          |        |                                                                     |                   |                   |             |
| SourceGene: RP11-764K9.1(ENSG00000225411.1)                |                      |                                                                |                  |          |        |                                                                     |                   |                   |             |
| TargetGeneSet: RP4 GBP4 GBP6 AMY2A SLAMF1 RPL31 IL1A RPL32 |                      |                                                                |                  |          |        |                                                                     |                   |                   |             |
| RPL14                                                      | RPL24                | RPL35A                                                         | TET2             | AGA      | BTF3   | CTD                                                                 | NPM1              | LTB               | RPL10A      |
| MRPS12                                                     | AHR                  | TRGV4                                                          | TRBV19           | RPS20    | GRIP1  | RPL7                                                                | HSD17B3           | RP13              | FAM13C RP11 |
| SLC6A13                                                    | RPL14P1              | IRAK3                                                          | PGAM1P5          | KDM2B    | TM9SF2 | TRAV3                                                               | RPL7AP6           | NUMB              | U6          |
| RPS3AP6                                                    | RSL1D1               | RPL17                                                          | ICAM4            | RFX1     | IL4I1  | CXADR                                                               | RBX1              | ALG12             |             |
| GOBPID                                                     | Pvalue               | OddsRatio                                                      | ExpCount         | Count    | Size   | Term                                                                |                   |                   |             |
| GO:0006415                                                 | 9                    | 6.41128520091338e-13                                           | 60.5093808630394 |          |        | translational termination                                           |                   | 0.220399972320255 |             |
| GO:0006414                                                 | 9                    | 2.40275164761738e-12                                           | 51.6346153846154 |          |        | translational elongation                                            |                   | 0.254307660369525 |             |
| GO:0006614                                                 | 9                    | 2.40275164761738e-12                                           | 51.6346153846154 |          |        | SRP-dependent cotranslational protein targeting to membrane         |                   | 0.254307660369525 |             |
| GO:0006613                                                 | 9                    | 2.62141405736306e-12                                           | 51.0987311657415 |          |        | cotranslational protein targeting to membrane                       |                   | 0.25672963808733  |             |
| GO:0045047                                                 | 9                    | 2.62141405736306e-12                                           | 51.0987311657415 |          |        | protein targeting to ER                                             |                   | 0.25672963808733  |             |
| GO:0072599                                                 | 9                    | 2.62141405736306e-12                                           | 51.0987311657415 |          |        | establishment of protein localization to endoplasmic reticulum      |                   | 0.25672963808733  |             |
| GO:0043241                                                 | 10                   | 2.66016827471332e-12                                           | 38.5621621621622 |          |        | protein complex disassembly                                         |                   | 0.382672479413189 |             |
| GO:0070972                                                 | 9                    | 6.99900852258675e-12                                           | 45.4350741002117 |          |        | protein localization to endoplasmic reticulum                       |                   | 0.28579337070099  |             |
| GO:0000184                                                 | 9                    | 7.55932440136553e-12                                           | 45.0188811188811 |          |        | nuclear-transcribed mRNA catabolic process, nonsense-mediated decay |                   | 0.288215348418795 |             |
| GO:0032984                                                 | 10                   | 9.2783898894966e-12                                            | 33.7207100591716 |          |        | macromolecular complex disassembly                                  |                   | 0.433534011487094 |             |
| GO:0019080                                                 | 9                    | 6.54295004255737e-11                                           | 34.7957746478873 |          |        | viral genome expression                                             |                   | 0.365718635388554 |             |
| GO:0019083                                                 | 9                    | 6.54295004255737e-11                                           | 34.7957746478873 |          |        | viral transcription                                                 |                   | 0.365718635388554 |             |
| GO:0006413                                                 | 9                    | 6.94340123210026e-11                                           | 34.5500268961807 |          |        | translational initiation                                            |                   | 0.368140613106359 |             |
| GO:0006612                                                 | 9                    | 7.36533111351605e-11                                           | 34.3076923076923 |          |        | protein targeting to membrane                                       |                   | 0.370562590824164 |             |
| GO:0043624                                                 | 9                    | 7.36533111351605e-11                                           | 34.3076923076923 |          |        | cellular protein complex disassembly                                |                   | 0.370562590824164 |             |
| GO:0000956                                                 | 9                    | 1.79734922251437e-10                                           | 30.8423076923077 |          |        | nuclear-transcribed mRNA catabolic process                          |                   | 0.409314234309044 |             |
| GO:0034623                                                 | 9                    | 2.33236914653626e-10                                           | 29.8972027972028 |          |        |                                                                     |                   | 0.421424122898069 |             |

STable4\_20PerPair

|                                       |     |                                                    |                  |                   |
|---------------------------------------|-----|----------------------------------------------------|------------------|-------------------|
| 9                                     | 174 | cellular macromolecular complex disassembly        |                  |                   |
| GO:0006402                            |     | 2.85681397983336e-10                               | 29.1813837050523 | 0.431112033769289 |
| 9                                     | 178 | mRNA catabolic process                             |                  |                   |
| GO:0072594                            |     | 9.59066382228669e-10                               | 25.2443786982249 | 0.494083454432219 |
| 9                                     | 204 | establishment of protein localization to organelle |                  |                   |
| GO:0022411                            |     | 1.00003837357733e-09                               | 20.3424460431655 | 0.697529582727839 |
| 10                                    | 288 | cellular component disassembly                     |                  |                   |
| GO:0006401                            |     | 1.00146514526641e-09                               | 25.1138147566719 | 0.496505432150024 |
| 9                                     | 205 | RNA catabolic process                              |                  |                   |
| GO:0019058                            |     | 2.86870699769166e-09                               | 22.1320166320166 | 0.559476852812954 |
| 9                                     | 231 | viral infectious cycle                             |                  |                   |
| GO:0022415                            |     | 8.07273389821069e-09                               | 19.5349371743794 | 0.629714206629299 |
| 9                                     | 260 | viral reproductive process                         |                  |                   |
| GO:0071845                            |     | 1.73863495664393e-08                               | 17.7998601398601 | 0.687841671856619 |
| 9                                     | 284 | cellular component disassembly at cellular level   |                  |                   |
| GO:0016032                            |     | 7.23299505154884e-08                               | 12.6757369614512 | 1.09231195073005  |
| 10                                    | 451 | viral reproduction                                 |                  |                   |
| GO:0033365                            |     | 1.3215335997197e-06                                | 10.4084880636605 | 1.14559546052176  |
| 9                                     | 473 | protein localization to organelle                  |                  |                   |
| GO:0006605                            |     | 1.3448823802972e-06                                | 10.3853598014888 | 1.14801743823957  |
| 9                                     | 474 | protein targeting                                  |                  |                   |
| GO:0042273                            |     | 2.82087160676787e-06                               | 150.072916666667 | 0.02906373261366  |
| 3                                     | 12  | ribosomal large subunit biogenesis                 |                  |                   |
| Tissue: Heart_Left_Ventricle=>Thyroid |     | Type: asymmetric                                   |                  |                   |

SourceGene: TCFL5(ENSG00000101190.8) transcription factor-like 5 (basic helix-loop-helix)

TargetGeneSet: RP11 ZMPSTE24 UQCRH URB2 HEATR1 SLC52A1 ALG3  
 NOP14 TMEM33 TIGD4 WDR36 SRFBP1 GEMIN5 BYSL RN5S223 SP4 ABCF2 TTI2  
 NUDCD1 ZC3H3 CYHR1 NCBP1 NGB PDZD7 TARBP2 IRF9 SETD1A ARMC5 NIP7  
 ZC3H18 CANT1 PTBP1 RAVR1 UPF1 ZNF793 ZNF571 ZNF576 GRWD1 PRMT1  
 ZNF417 TRIM28 TOMM34 URB1 GART

| GOBPID                                          | Pvalue   | OddsRatio | ExpCount    | Count       | Size | Term |
|-------------------------------------------------|----------|-----------|-------------|-------------|------|------|
| GO:0022613                                      | 4.64E-11 |           | 28.72194135 | 0.513805273 | 10   | 225  |
| ribonucleoprotein complex biogenesis            |          |           |             |             |      |      |
| GO:0071843                                      | 8.41E-11 |           | 26.93943421 | 0.545775379 | 10   | 239  |
| cellular component biogenesis at cellular level |          |           |             |             |      |      |
| GO:0042254                                      | 9.56E-07 |           | 22.18337218 | 0.34025327  | 6    | 149  |
| ribosome biogenesis                             |          |           |             |             |      |      |

STable4\_20PerPair

GO:0022618 2.27E-06 28.42857143 0.216940004 5 95  
 ribonucleoprotein complex assembly

GO:0071826 2.92E-06 26.92293233 0.228357899 5 100  
 ribonucleoprotein complex subunit organization

Tissue: Thyroid=>Heart\_Left\_Ventricle Type: asymmetric

SourceGene: USP35(ENSG00000118369.8) ubiquitin specific peptidase 35

|                |         |          |         |         |        |         |          |         |          |           |      |
|----------------|---------|----------|---------|---------|--------|---------|----------|---------|----------|-----------|------|
| TargetGeneSet: | MXRA8   | CTNNBIP1 | RP11    | CMPK1   | PODN   | NEGR1   | GSTM5    |         |          |           |      |
|                | BNIPL   | KIRREL   | TKT     | RGS5    | DPT    | LAMC1   | CFH      | FMOD    | AKT3     | ZNF692    |      |
|                | GRHL1   | RHOB     | KLHL29  | C2orf56 | EFEMP1 | SPRED2  | ANTXR1   | IL1R1   | CYBRD1   | COL5A2    |      |
|                | SLC23A3 | SCARNA6  | COL6A3  | ITPR1   | FBLN2  | HEMK1   | C3orf78  | VGLL3   | EPHA3    | ABI3BP    |      |
|                | CCDC80  | CLSTN2   | IGSF10  | SPON2   | EVC    | AFAP1   | APBB2    | GABRB1  | ATP10D   | PDGFRA    |      |
|                | 11-Sep  | PTPN13   | PKD2    | U6      | UNC5C  | GLRB    | SH3RF1   | SPOCK1  | PDGFRB   | C5orf62   | EBF1 |
|                | GNL1    | TNFRSF21 | RP3     | PM20D2  | MAN1A1 | EPB41L2 | HBS1L    | SASH1   | FNDC1    |           |      |
|                | COL28A1 | IGFBP3   | EGFR    | EBF2    | BNIP3L | INTS9   | KIF13B   | CTD     | GDF6     | OGN       | OMD  |
|                | ASPN    | ECM2     | SVEP1   | SLC27A4 | COL5A1 | VIM     | KIAA1462 | DNAJC12 | MARVELD1 |           |      |
|                | SPON1   | GPR137   | SLCO2B1 | DPAGT1  | KCNA5  | EMP1    | RERG     | EPS8    | DCN      | ANAPC7    |      |
|                | HMGB1   | LHFP     | ITGBL1  | ADPRHL1 | MMP14  | LRFN5   | MAP3K9   | FBLN5   | FBN1     | ALDH1A2   |      |
|                | PTPN9   | TPSAB1   | ZNF423  | FTO     | MMP2   | CDH11   | SF3B3    | FTSJD1  | CHD3     | COX10-AS1 |      |
|                | TLCD1   | NUFIP2   | CCT6B   | KCNJ2   | SETBP1 | DSEL    | COL5A3   | CARM1   | NFIX     | LTBP4     |      |
|                | ZFP112  | PTPRA    | EPB41L1 | APCDD1L | ICOSLG | C21orf2 | COL6A2   | MN1     | GALR3    | FBLN1     | CTA  |
|                | OFD1    | CHRD1L   | GPC3    | ZNF275  |        |         |          |         |          |           |      |

GOBPID Pvalue OddsRatio ExpCount Count Size Term

STable4\_20PerPair

|                                      |          |             |             |    |     |
|--------------------------------------|----------|-------------|-------------|----|-----|
| GO:0030198                           | 3.46E-13 | 14.90706076 | 1.348072798 | 16 | 161 |
| extracellular matrix organization    |          |             |             |    |     |
| GO:0043062                           | 3.82E-13 | 14.80391389 | 1.356445921 | 16 | 162 |
| extracellular structure organization |          |             |             |    |     |
| GO:0031589                           | 1.01E-06 | 7.402617801 | 1.691370839 | 11 | 202 |
| cell-substrate adhesion              |          |             |             |    |     |
| GO:0030199                           | 7.45E-06 | 22.01662562 | 0.276313058 | 5  | 33  |
| collagen fibril organization         |          |             |             |    |     |

STable4\_20PerPair

|                                        |          |             |             |   |   |
|----------------------------------------|----------|-------------|-------------|---|---|
| GO:0061438                             | 1.12E-05 | 121.4152542 | 0.050238738 | 3 | 6 |
| renal system vasculature morphogenesis |          |             |             |   |   |

|                                  |          |             |             |   |   |
|----------------------------------|----------|-------------|-------------|---|---|
| GO:0061439                       | 1.12E-05 | 121.4152542 | 0.050238738 | 3 | 6 |
| kidney vasculature morphogenesis |          |             |             |   |   |

|                                  |          |             |             |   |    |
|----------------------------------|----------|-------------|-------------|---|----|
| GO:0022617                       | 1.16E-05 | 19.88181313 | 0.301432427 | 5 | 36 |
| extracellular matrix disassembly |          |             |             |   |    |

Tissue: Muscle\_skeletal=>Thyroid      Type: asymmetric

STable4\_20PerPair

SourceGene: C11orf54(ENSG00000182919.9) ester hydrolase C11orf54

TargetGeneSet: RUNX3 CD2 FAM46C FCRL5 LY9 PTPN7 LAX1 MAL CD8B  
 IGKJ5 IGKC IGKJ4 IGKJ1 IGKV4-1 IGKV5-2 IGKV1-6 IGKV1-9 IGKV3-11  
 IGKV6-21 IGKV1D-13 IGKV3D-11 CD96 TIGIT RHOH IGJ RP11  
 GZMA CTD FAM26F TRGV5 U3 FAM27E1 FAM22A SNORD14A POLA2  
 C11orf54 POU2AF1 REXO2 CD3E CD3D PRKAG1 LCP1 TRAV12-2  
 HAUS4 PLD4 IGHG3 IGHJ6 IGHJ5 IGHV6-1 IGHV1-2 IGHV2-5 IGHV3-15  
 IGHV1-18 IGHV3-21 IGHV3-23 IGHV3-30 IGHV3-33  
 IGHV4-34 IGHV4-39 IGHV1-46 IGHV3-48 IGHV3-49  
 IGHV5-51 IGHV3-53 IGHV4-59 IGHV4-61 IGHV2-70  
 1-Sep GPR114 IKZF3 TMEM106A VMAC ZNF83 FER1L4 IGLV4-69  
 IGLV1-51 IGLV9-49 IGLV1-44 IGLV7-43 IGLV3-25  
 IGLV3-19 IGLV2-11 IGLV3-1 IGLC2 IGLC3 IGLC6 RAC2 CBX7 RP4  
 PIM2 IL2RG

GOBPID Pvalue OddsRatio ExpCount Count Size Term

GO:0006958 1.07E-14 98.56783537 0.141858695 9 50  
 "complement activation, classical pathway"

GO:0006956 9.85E-14 74.77083333 0.178741956 9 63  
 complement activation

GO:0002455 1.33E-13 72.09040179 0.184416303 9 65  
 humoral immune response mediated by circulating immunoglobulin

STable4\_20PerPair

|                                                                                                                           |          |             |             |    |     |   |
|---------------------------------------------------------------------------------------------------------------------------|----------|-------------|-------------|----|-----|---|
| GO:0016064                                                                                                                | 4.35E-13 | 45.70105398 | 0.314926303 | 10 | 111 |   |
| immunoglobulin mediated immune response                                                                                   |          |             |             |    |     |   |
| GO:0019724                                                                                                                | 5.70E-13 | 44.37344913 | 0.323437824 | 10 | 114 | B |
| cell mediated immunity                                                                                                    |          |             |             |    |     |   |
| GO:0002449                                                                                                                | 8.25E-13 | 33.50299145 | 0.473808041 | 11 | 167 |   |
| lymphocyte mediated immunity                                                                                              |          |             |             |    |     |   |
| GO:0006959                                                                                                                | 1.14E-12 | 41.18087558 | 0.346135216 | 10 | 122 |   |
| humoral immune response                                                                                                   |          |             |             |    |     |   |
| GO:0072376                                                                                                                | 1.17E-12 | 55.23672945 | 0.23264826  | 9  | 82  |   |
| protein activation cascade                                                                                                |          |             |             |    |     |   |
| GO:0002460                                                                                                                | 2.00E-12 | 30.71372549 | 0.513528476 | 11 | 181 |   |
| adaptive immune response based on somatic recombination of immune receptors built from immunoglobulin superfamily domains |          |             |             |    |     |   |



STable4\_20PerPair

|                                        |          |             |             |    |     |   |
|----------------------------------------|----------|-------------|-------------|----|-----|---|
| GO:0002250                             | 5.34E-12 | 27.88823529 | 0.561760432 | 11 | 198 |   |
| adaptive immune response               |          |             |             |    |     |   |
| GO:0002443                             | 1.07E-11 | 26.05166667 | 0.598643692 | 11 | 211 |   |
| leukocyte mediated immunity            |          |             |             |    |     |   |
| GO:0002252                             | 2.58E-11 | 17.47232861 | 1.095149125 | 13 | 386 |   |
| immune effector process                |          |             |             |    |     |   |
| GO:0002253                             | 4.51E-10 | 17.97939815 | 0.848314996 | 11 | 299 |   |
| activation of immune response          |          |             |             |    |     |   |
| GO:0050778                             | 3.58E-09 | 14.60122757 | 1.032731299 | 11 | 364 |   |
| positive regulation of immune response |          |             |             |    |     |   |
| GO:0042110                             | 2.09E-07 | 12.79233871 | 0.905058473 | 9  | 319 | T |
| cell activation                        |          |             |             |    |     |   |

STable4\_20PerPair

GO:0046649 2.56E-07 10.66651415 1.228496298 10 433  
 Lymphocyte activation

Tissue: Muscle\_skeletal=>Thyroid Type: cluster  
 SourceGene: C11orf54(ENSG00000182919.9)  
 TargetGeneSet: RUNX3 CD2 FAM46C FCRL5 LY9 PTPN7 LAX1 MAL CD8B  
 IGKJ5 IGKC IGKJ4 IGKJ1 IGKV4-1 IGKV5-2 IGKV1-6 IGKV1-9 IGKV3-11  
 IGKV6-21 IGKV1D-13 IGKV3D-11 CD96 TIGIT RHOH IGJ RP11  
 GZMA CTD FAM26F TRGV5 U3 FAM27E1 FAM22A SNORD14A POLA2  
 C11orf54 POU2AF1 REXO2 CD3E CD3D PRKAG1 LCP1 TRAV12-2  
 HAUS4 PLD4 IGHG3 IGHJ6 IGHJ5 IGHV6-1 IGHV1-2 IGHV2-5 IGHV3-15  
 IGHV1-18 IGHV3-21 IGHV3-23 IGHV3-30 IGHV3-33 IGHV3-33  
 IGHV4-34 IGHV4-39 IGHV1-46 IGHV3-48 IGHV3-49  
 IGHV5-51 IGHV3-53 IGHV4-59 IGHV4-61 IGHV2-70  
 SEPT1 GPR114 IKZF3 TMEM106A VMAC ZNF83 FER1L4 IGLV4-69  
 IGLV1-51 IGLV9-49 IGLV1-44 IGLV7-43 IGLV3-25  
 IGLV3-19 IGLV2-11 IGLV3-1 IGLC2 IGLC3 IGLC6 RAC2 CBX7 RP4  
 PIM2 IL2RG  
 GOBPID Pvalue OddsRatio ExpCount Count Size Term  
 GO:0006958 1.07045074677632e-14 98.5678353658537 0.141858694900007  
 9 50 complement activation, classical pathway  
 GO:0006956 9.852512107991e-14 74.7708333333333 0.178741955574009  
 9 63 complement activation  
 GO:0002455 1.32541446159318e-13 72.0904017857143 0.184416303370009  
 9 65 humoral immune response mediated by circulating immunoglobulin  
 GO:0016064 4.34557281079881e-13 45.7010539763654 0.314926302678015  
 10 111 immunoglobulin mediated immune response  
 GO:0019724 5.70453571225452e-13 44.3734491315136 0.323437824372016  
 10 114 B cell mediated immunity  
 GO:0002449 8.25067236558966e-13 33.5029914529915 0.473808040966023  
 11 167 lymphocyte mediated immunity  
 GO:0006959 1.13719065670266e-12 41.1808755760369 0.346135215556017  
 10 122 humoral immune response  
 GO:0072376 1.17441085855504e-12 55.2367294520548 0.232648259636011  
 9 82 protein activation cascade  
 GO:0002460 1.99948012484219e-12 30.7137254901961 0.513528475538025  
 11 181 adaptive immune response based on somatic recombination of immune  
 receptors built from immunoglobulin superfamily domains  
 GO:0002250 5.33749431796508e-12 27.8882352941176 0.561760431804027  
 11 198 adaptive immune response  
 GO:0002443 1.06649145406103e-11 26.0516666666667 0.598643692478029  
 11 211 leukocyte mediated immunity  
 GO:0002252 2.57978683847137e-11 17.4723286097281 1.09514912462805  
 13 386 immune effector process  
 GO:0002253 4.50582818573953e-10 17.9793981481481 0.848314995502041  
 11 299 activation of immune response  
 GO:0050778 3.57602950676341e-09 14.6012275731822 1.03273129887205  
 11 364 positive regulation of immune response

Stable4\_20PerPair

|                                  |                                                                                                                           |                  |                     |
|----------------------------------|---------------------------------------------------------------------------------------------------------------------------|------------------|---------------------|
| GO:0042110                       | 2.09246316077927e-07                                                                                                      | 12.7923387096774 | 0.905058473462044   |
| 9 319                            | T cell activation                                                                                                         |                  |                     |
| GO:0046649                       | 2.56462609546679e-07                                                                                                      | 10.6665141462671 | 1.22849629783406    |
| 10 433                           | lymphocyte activation                                                                                                     |                  |                     |
| Tissue: Muscle_skeletal=>Thyroid | Type:                                                                                                                     | cluster          |                     |
| SourceGene:                      | ENSG00000182648.7                                                                                                         |                  |                     |
| TargetGeneSet:                   | RP4                                                                                                                       | PLOD1            | GBP5                |
| SLAMF7                           | LY9                                                                                                                       | PTPN7            | LAX1                |
| RBKS                             | MAL                                                                                                                       | IGKJ5            | IGKC                |
| IGKV3-11                         |                                                                                                                           | IGKV1-16         |                     |
| IGKV2-30                         |                                                                                                                           | IGKV1-33         |                     |
| ITGA4                            | RUFY4                                                                                                                     | SP140            | PDCD1               |
| ACTG1P1                          | HLTF-AS1                                                                                                                  |                  | MCF2L2              |
| ATG12                            | OR2I1P                                                                                                                    | RP1              | TAGAP               |
| CSPP1                            | FAM92A1                                                                                                                   | ZHX1             | PAICSP1             |
| NUMA1                            | CD3E                                                                                                                      | CD3D             | CD3G                |
| BCL2L2                           | HNRPCP                                                                                                                    | DDX24            | EXOC3L4             |
| IGHV1-2                          | IGHV3-7                                                                                                                   | IGHV3-9          | IGHV3-11            |
| IGHV4-31                         |                                                                                                                           | IGHV3-33         |                     |
| IGHV5-51                         |                                                                                                                           | IGHV4-59         |                     |
| TNFRSF17                         |                                                                                                                           | SEPT1            | ITGAL               |
| THOC1                            | GZMM                                                                                                                      | CCDC94           | CYP4F8              |
| UBASH3A                          | PDXK                                                                                                                      | C21orf67         |                     |
| IGLV2-23                         |                                                                                                                           | IGLV3-21         |                     |
| IGLC2                            | SSTR3                                                                                                                     | DDX17            | SPIN2B              |
| GOBPID                           | Pvalue                                                                                                                    | OddsRatio        | ExpCount            |
| GO:0002449                       | 1.66142026815146e-13                                                                                                      | 17.9731781376518 | 1.07473531243513    |
| 15 167                           | lymphocyte mediated immunity                                                                                              |                  |                     |
| GO:0002443                       | 3.41187240157216e-13                                                                                                      | 15.0921078921079 | 1.35789910732821    |
| 16 211                           | leukocyte mediated immunity                                                                                               |                  |                     |
| GO:0046649                       | 3.12441095274885e-12                                                                                                      | 9.25072141696242 | 2.7865891633797 20  |
| 433                              | lymphocyte activation                                                                                                     |                  |                     |
| GO:0002252                       | 3.88485481421508e-12                                                                                                      | 9.78823919287134 | 2.48411874610754    |
| 19 386                           | immune effector process                                                                                                   |                  |                     |
| GO:0050778                       | 1.42827202853624e-11                                                                                                      | 9.7193063583815  | 2.34253684866099 18 |
| 364                              | positive regulation of immune response                                                                                    |                  |                     |
| GO:0006958                       | 2.57203013223223e-11                                                                                                      | 37.4137630662021 | 0.321777039651235   |
| 9 50                             | complement activation, classical pathway                                                                                  |                  |                     |
| GO:0006956                       | 2.26936872040733e-10                                                                                                      | 28.3809523809524 | 0.405439069960556   |
| 9 63                             | complement activation                                                                                                     |                  |                     |
| GO:0002455                       | 3.03310069282267e-10                                                                                                      | 27.3635204081633 | 0.418310151546606   |
| 9 65                             | humoral immune response mediated by circulating immunoglobulin                                                            |                  |                     |
| GO:0006959                       | 3.34336945914543e-10                                                                                                      | 17.2178642056691 | 0.785135976749014   |
| 11 122                           | humoral immune response                                                                                                   |                  |                     |
| GO:0042110                       | 1.7145708730557e-09                                                                                                       | 8.89043522267206 | 2.05293751297488    |
| 15 319                           | T cell activation                                                                                                         |                  |                     |
| GO:0002460                       | 1.78298176662382e-09                                                                                                      | 12.4383081306158 | 1.16483288353747    |
| 12 181                           | adaptive immune response based on somatic recombination of immune receptors built from immunoglobulin superfamily domains |                  |                     |
| GO:0016064                       | 2.24733764799014e-09                                                                                                      | 17.0070380532029 | 0.714345028025742   |
| 10 111                           | immunoglobulin mediated immune response                                                                                   |                  |                     |
| GO:0072376                       | 2.54310053819614e-09                                                                                                      | 20.9662426614481 | 0.527714345028026   |
| 9 82                             | protein activation cascade                                                                                                |                  |                     |
| GO:0019724                       | 2.92119921605593e-09                                                                                                      | 16.5129749768304 | 0.733651650404816   |
| 10 114                           | B cell mediated immunity                                                                                                  |                  |                     |
| GO:0002250                       | 4.9501471041309e-09                                                                                                       | 11.2879330943847 | 1.27423707701889    |
| 12 198                           | adaptive immune response                                                                                                  |                  |                     |
| GO:0002253                       | 6.65456799691893e-09                                                                                                      | 8.75069953364424 | 1.92422669711439    |
| 14 299                           | activation of immune response                                                                                             |                  |                     |
| GO:0050863                       | 1.6946632877093e-07                                                                                                       | 9.03763066202091 | 1.42225451525846    |
| 11 221                           | regulation of T cell activation                                                                                           |                  |                     |
| GO:0051249                       | 2.5589078126252e-07                                                                                                       | 7.70097034303676 | 1.82125804442599    |
| 12 283                           | regulation of lymphocyte activation                                                                                       |                  |                     |

Stable4\_20PerPair

|                                  |                                             |                    |                                 |
|----------------------------------|---------------------------------------------|--------------------|---------------------------------|
| GO:0002694                       | 9.78514014293024e-07                        | 6.73570658036677   | 2.06580859456093                |
| 12 321                           | regulation of leukocyte activation          |                    |                                 |
| GO:0050865                       | 1.95808857459254e-06                        | 6.27816940807877   | 2.20739049200747                |
| 12 343                           | regulation of cell activation               |                    |                                 |
| GO:0050870                       | 1.41352685719421e-05                        | 8.19631901840491   | 1.10047747560722                |
| 8 171                            | positive regulation of T cell activation    |                    |                                 |
| GO:0002696                       | 1.87270457946094e-05                        | 6.76052295918367   | 1.49948100477476                |
| 9 233                            | positive regulation of leukocyte activation |                    |                                 |
| Tissue: Muscle_skeletal=>Thyroid | Type: asymmetric                            |                    |                                 |
| SourceGene:                      | ENSG00000244256.1                           |                    |                                 |
| TargetGeneSet:                   | RP11 C1orf159                               | RP4 CEP104 LZIC    | DFFA PLOD1                      |
| DNAJC16 HP1BP3                   | LDLRAP1 EYA3 PHACTR4                        | RCC1 PEF1 TXLNA    | TMEM234 NCDN                    |
| FOXO6 PPCS                       | CCDC24 DNAJC6 RBMXL1                        | CYB561D1 GOLPH3L   | SNX27 INTS3                     |
| SLC39A1 TDRD10                   | MSTO1 UBQLN4 CCT3                           | POGK MYBPH ZNF238  | ID2 C2orf48                     |
| PDIA6 SLC5A6                     | PPM1G ARHGEF33                              | CCT4 PCBP1-AS1     | SPR MOB1A DQX1                  |
| AUP1 SEMA4F                      | C2orf68 MRPS5 LMAN2L                        | NOSTRIN KRT18P19   | HSPD1 ALS2CR12                  |
| FZD5 ASB1                        | HDLBP DTYMK TTLL3                           | CRELD1 SLC6A1-AS1  | NME6 WDR6                       |
| FAM116A SLC25A36                 | CPA3 SLC33A1                                | SSR3 LRCH3 TMEM128 | UGDH-AS1                        |
| DCAF4L1 ANKRD17                  | CDKL2 CTSO                                  | DNAJC21 FBXO4      | KIF2A PAPD4 PCDHGA1 TCOF1       |
| TMED9 SSR1                       | HCG17 DAXX                                  | SYNGAP1 NUDT3      | FANCE BRPF3 NFYA RP1            |
| AARS2 BAG2                       | SYNCRIP PEX7                                | KIAA0895           | URGCP HSPB1 CYP3A43 TNPO3       |
| CNOT4 HIPK2                      | XKR6 NEIL2                                  | POLR3D CHMP7       | CTD C8orf40 STMN2 GAPDHP62      |
| GRHL2 LRRC6                      | ZNF623 PLAA                                 | VCP ATP8B5P        | MCART1 FAM22G NANS ALG2         |
| PRPS1P2 CCBL1                    | TOR1B PRRC2B                                | SURF4 MAMDC4       | C9orf169 TUBB4B NOXA1           |
| KRT8P37 CDFN                     | SUV39H2 C10orf114                           | ZDHHC16 CYP2E1     | RP13 UBQLNL SLC35C1             |
| CELFI1 PATL1                     | GANAB MARK2                                 | STIP1 FKBP2        | GPR137 SYVN1 RBM14 7SK          |
| C2CD3 CHORDC1                    | ATM RNF214                                  | DPAGT1 RNF26       | HSPA8 STT3A RAD52 CBX3P4        |
| FKBP4 TEAD4                      | NCAPD2 PEX5                                 | RPL13AP20          | KIAA1467 REP15 PUS7L            |
| H1FNT TUBA1C                     | RAB5B RNF41                                 | OS9 TSPAN31        | TBC1D30 TSPAN8 ALDH2 C12orf65   |
| GOLGA3 ITM2B                     | DNAJC3-AS1                                  | DNAJC3 PCID2       | OR11H7 MRPL52 AJUBA ACIN1       |
| NEDD8 FANCM                      | GNPNAT1 HNRPCP                              | MAP3K9 AHA1        | ZC3H14 HSP90AA1 GOLGA8B         |
| ZFYVE19 PPP1R14D                 | ZFP106 TP53BP1                              | PPIP5K1 PPIB       | MAN2C1 DNAJA4 SELS HN1L         |
| SULT1A3 TBC1D10B                 | FBXL19-AS1                                  | SALL1 CMTM4        | C16orf46                        |
| RNF167 KCTD11                    | FLOT2 CCT6B                                 | WIPF2 UBE2Z        | ZNF652 SRP68 QRICH2 CANT1       |
| ENGASE CSNK1D                    | TMEM241 ZNF397                              | MBD1 AP3D1         | ZNF555 ELAVL1 ZGLP1 ZNF441 JAK3 |
| PGPEP1 MIA                       | SMG9 ZNF284                                 | BLOC1S3 KPTN       | PRMT1 ZNF347 ZNF761 ZNF329 MCM8 |
| HM13 TOMM34                      | STK4 ADNP                                   | C20orf11           | PDXK UBE2G2 KRT18P5 UBE2L3      |
| SDF2L1 ZNF70                     | MORC2 PRR14L                                | CTA RANGAP1        | RP6 ZBED4 ALG12 CRELD2          |
| CXorf58 FAM123B                  | KIAA2022                                    | MAGT1 TIMM8A       | MID2 LONRF3 ZNF449 FHL1         |
| GOBPID                           | Pvalue OddsRatio                            | ExpCount           | Count Size Term                 |
| GO:0006457                       | 4.70322619491241e-14                        | 9.20170244263509   | 3.06414780984015                |
| 23 216                           | protein folding                             |                    |                                 |
| GO:0006986                       | 2.21067554751856e-06                        | 6.78874716058012   | 1.82997716421009                |
| 11 129                           | response to unfolded protein                |                    |                                 |
| GO:0035966                       | 3.71122598459935e-06                        | 6.40540206185567   | 1.92927825064009                |
| 11 136                           | response to topologically incorrect protein |                    |                                 |
| Tissue: Muscle_skeletal=>Thyroid | Type: cluster                               |                    |                                 |
| SourceGene:                      | ENSG00000244256.1                           |                    |                                 |
| TargetGeneSet:                   | RP11 C1orf159                               | RP4 CEP104 LZIC    | DFFA PLOD1                      |
| DNAJC16 HP1BP3                   | LDLRAP1 EYA3 PHACTR4                        | RCC1 PEF1 TXLNA    | TMEM234 NCDN                    |
| FOXO6 PPCS                       | CCDC24 DNAJC6 RBMXL1                        | CYB561D1 GOLPH3L   | SNX27 INTS3                     |
| SLC39A1 TDRD10                   | MSTO1 UBQLN4 CCT3                           | POGK MYBPH ZNF238  | ID2 C2orf48                     |
| PDIA6 SLC5A6                     | PPM1G ARHGEF33                              | CCT4 PCBP1-AS1     | SPR MOB1A DQX1                  |
| AUP1 SEMA4F                      | C2orf68 MRPS5 LMAN2L                        | NOSTRIN KRT18P19   | HSPD1 ALS2CR12                  |
| FZD5 ASB1                        | HDLBP DTYMK TTLL3                           | CRELD1 SLC6A1-AS1  | NME6 WDR6                       |
| FAM116A SLC25A36                 | CPA3 SLC33A1                                | SSR3 LRCH3 TMEM128 | UGDH-AS1                        |
| DCAF4L1 ANKRD17                  | CDKL2 CTSO                                  | DNAJC21 FBXO4      | KIF2A PAPD4 PCDHGA1 TCOF1       |
| TMED9 SSR1                       | HCG17 DAXX                                  | SYNGAP1 NUDT3      | FANCE BRPF3 NFYA RP1            |
| AARS2 BAG2                       | SYNCRIP PEX7                                | KIAA0895           | URGCP HSPB1 CYP3A43 TNPO3       |
| CNOT4 HIPK2                      | XKR6 NEIL2                                  | POLR3D CHMP7       | CTD C8orf40 STMN2 GAPDHP62      |
| GRHL2 LRRC6                      | ZNF623 PLAA                                 | VCP ATP8B5P        | MCART1 FAM22G NANS ALG2         |
| PRPS1P2 CCBL1                    | TOR1B PRRC2B                                | SURF4 MAMDC4       | C9orf169 TUBB4B NOXA1           |
| KRT8P37 CDFN                     | SUV39H2 C10orf114                           | ZDHHC16 CYP2E1     | RP13 UBQLNL SLC35C1             |

Stable4\_20PerPair

|                |                            |            |            |                                             |          |                  |          |                  |             |      |
|----------------|----------------------------|------------|------------|---------------------------------------------|----------|------------------|----------|------------------|-------------|------|
| CELF1          | PATL1                      | GANAB      | MARK2      | STIP1                                       | FKBP2    | GPR137           | SYVN1    | RBM14            | 7SK         |      |
| C2CD3          | CHORDC1                    | ATM        | RNF214     | DPAGT1                                      | RNF26    | HSPA8            | STT3A    | RAD52            | CBX3P4      |      |
| FKBP4          | TEAD4                      | NCAPD2     | PEX5       | RPL13AP20                                   |          | KIAA1467         |          | REP15            | PUS7L       |      |
| H1FNT          | TUBA1C                     | RAB5B      | RNF41      | OS9                                         | TSPAN31  | TBC1D30          | TSPAN8   | ALDH2            | C12orf65    |      |
| GOLGA3         | ITM2B                      | DNAJC3-AS1 | DNAJC3     | PCID2                                       | OR11H7   | MRPL52           | AJUBA    | ACIN1            |             |      |
| NEDD8          | FANCM                      | GNPNAT1    | HNRPCP     | MAP3K9                                      | AHSA1    | ZC3H14           | HSP90AA1 | GOLGA8B          |             |      |
| ZFYVE19        | PPP1R14D                   |            | ZFP106     | TP53BP1                                     | PPIP5K1  | PIPB             | MAN2C1   | DNAJA4           | SELS        | HN1L |
| SULT1A3        | TBC1D10B                   |            | FBXL19-AS1 |                                             | SALL1    | CMTM4            | C16orf46 |                  | ZC3H18      |      |
| RNF167         | KCTD11                     | FLOT2      | CCT6B      | WIPF2                                       | UBE2Z    | ZNF652           | SRP68    | QRICH2           | CANT1       |      |
| ENGASE         | CSNK1D                     | TMEM241    | ZNF397     | MBD1                                        | AP3D1    | ZNF555           | ELAVL1   | ZGLP1            | ZNF441      | JAK3 |
| PGPEP1         | MIA                        | SMG9       | ZNF284     | BLOC1S3                                     | KPTN     | PRMT1            | ZNF347   | ZNF761           | ZNF329      | MCM8 |
| HM13           | TOMM34                     | STK4       | ADNP       | C20orf11                                    |          | PDXK             | UBE2G2   | KRT18P5          | UBE2L3      |      |
| SDF2L1         | ZNF70                      | MORC2      | PRR14L     | CTA                                         | RANGAP1  | RP6              | ZBED4    | ALG12            | CRELD2      |      |
| CXorf58        | FAM123B                    | KIAA2022   |            | MAGT1                                       | TIMM8A   | MID2             | LONRF3   | ZNF449           | FHL1        |      |
| GOBPID         | Pvalue                     | OddsRatio  |            | ExpCount                                    |          | Count            | Size     | Term             |             |      |
| GO:0006457     | 23                         | 216        |            | 4.70322619491241e-14                        |          | 9.20170244263509 |          | 3.06414780984015 |             |      |
|                |                            |            |            | protein folding                             |          |                  |          |                  |             |      |
| GO:0006986     | 11                         | 129        |            | 2.21067554751856e-06                        |          | 6.78874716058012 |          | 1.82997716421009 |             |      |
|                |                            |            |            | response to unfolded protein                |          |                  |          |                  |             |      |
| GO:0035966     | 11                         | 136        |            | 3.71122598459935e-06                        |          | 6.40540206185567 |          | 1.92927825064009 |             |      |
|                |                            |            |            | response to topologically incorrect protein |          |                  |          |                  |             |      |
| Tissue:        | Muscle_skeletal=>          | Thyroid    |            | Type:                                       |          | asymmetric       |          |                  |             |      |
| SourceGene:    | GAPVD1(ENSG00000165219.14) |            |            |                                             |          |                  |          |                  |             |      |
| TargetGeneSet: | MTND1P23                   |            | NUDC       | WASF2                                       | EYA3     | MED18            | PHACTR4  | GNG5             | ETV3        |      |
| TROVE2         | ZNF281                     | RP11       | ADAM18     | C2orf18                                     | MOB1A    | PRKAR2A          | IP6K1    | KIAA2018         |             |      |
| RNF168         | ZNF141                     | RFC1       | SETD7      | MTMR12                                      | PHAX     | CTB              | MTND5P11 |                  | RBM22       |      |
| PPP1R18        | BTBD9                      | MTRNR2L9   |            | ARID1B                                      | FOXK1    | PURB             | MEPCE    | CBLL1            | GCC1        |      |
| NEIL2          | HR                         | CTD        | KAT6A      | C9orf102                                    |          | NIPSNAP3A        |          | ZBTB43           | GTF3C4      |      |
| NCLP1          | NRBF2                      | POLR3A     | TSSC4      | MTRNR2L8                                    |          | SPTY2D1          | ATG13    | HEXIM1           | OSBP        |      |
| MARK2          | RSF1                       | DDX6       | RNF26      | ERC1                                        | ZBTB39   | GCN1L1           | SBN01    | RNF6             | N4BP2L2-IT1 |      |
| RBM23          | SOCS6                      | DLST       | GOLGA8IP   |                                             | TJP1     | EMP2             | FTO-IT1  | NFATC3           | VPS4A       |      |
| ATXN1L         | METTL16                    | NCOR1      | SMCR8      | MED1                                        | WIPF2    | PSME3            | ZNF652   | RPS2P48          | MAP3K3      |      |
| CANT1          | MYL12B                     | NFIC       | FEM1A      | ZNF557                                      | ZNF121   | ZNF562           | ZNF791   | DNAJB1           | ZNF429      |      |
| ZFP82          | ARHGAP35                   |            | KCNJ14     | ZNF480                                      | ZNF264   | ZNF543           | ZNF749   | ZNF329           | FASTKD5     |      |
| CRNKL1         | PLAGL2                     | PHF20      | ZSWIM1     | ZNFX1                                       | TSHZ2    | C20orf11         |          | PRR14L           | SMCR7L      |      |
| RRP7A          | PPARA                      | CERK       | USP9X      | GNL3L                                       |          |                  |          |                  |             |      |
| GOBPID         | Pvalue                     | OddsRatio  |            | ExpCount                                    |          | Count            | Size     | Term             |             |      |
| Tissue:        | Muscle_skeletal=>          | Thyroid    |            | Type:                                       |          | cluster          |          |                  |             |      |
| SourceGene:    | KLF4(ENSG00000136826.9)    |            |            |                                             |          |                  |          |                  |             |      |
| TargetGeneSet: | RP4                        | CTNNBIP1   |            | PLOD1                                       | HP1BP3   | TCEB3            | LYPLA2   | EYA3             |             |      |
| TXLNA          | MRPS15                     | ZMPSTE24   |            | CTPS                                        | LEPRE1   | CCDC24           | EIF2B3   | CYP4A11          | OMA1        |      |
| SRSF11         | BCL10                      | FNBP1L     | RP11       | CYB561D1                                    |          | AMPD2            | MAN1A2   | SEC22B           | NOTCH2NL    |      |
| GOLPH3L        | CERS2                      | INTS3      | DENND4B    | CREB3L4                                     | FLAD1    | SLC50A1          | MSTO1    | UBQLN4           | CCT3        |      |
| C1orf182       |                            | USP21      | HSD17B7    | POGK                                        | RNASEL   | ZC3H11A          | TMEM81   | CDK18            | ELK4        |      |
| C1orf96        | SIPA1L2                    | OR11L1     | NOL10      | PDIA6                                       | TTC32    | RAB10            | SLC5A6   | XPO1             | CCT4        |      |
| PPP3R1         | PCBP1-AS1                  |            | PCYOX1     | PCGF1                                       | AUP1     | MRPS5            | RALB     | HNRNPA3          | HSPD1       |      |
| C2orf69        | WDR12                      | PARD3B     | METTL21A   |                                             | RPE      | RQCD1            | TTLL4    | ABCB6            | ATG4B       |      |
| CRELD1         | CHCHD4                     | SEMA3F     | SLC38A3    | IFRD2                                       | HEMK1    | RAD54L2          | DUSP7    | POC1A            | PHF7        | ARF4 |
| TFG            | TMEM39A                    | COPG1      | NUDT16     | UBA5                                        | ACTG1P1  | SLC25A36         |          | SLC33A1          | SSR3        |      |
| MFS1           | MCCC1                      | ALG3       | TNIP2      | GRPEL1                                      | UGDH-AS1 |                  | DCAF4L1  | TEC              | SEC31A      |      |
| THAP9          | TMSB4XP8                   |            | EIF4E      | C4orf32                                     | SEC24D   | PPP1R14BP3       |          | SLC10A7          | STOX2       | SDHA |
| MTRR           | CTD                        | MARCH6     | FAM105A    | IPO11                                       | PIK3R1   | ANKRA2           | ZCCHC9   | TMEM167A         |             |      |
| EPB41L4A-AS1   |                            | XBP1P1     | CSNK1G3    | CHSY3                                       | SMAD5    | CTB              | ARAP3    | PCDH12           | ADRB2       |      |
| FAM114A2       |                            | MFAP3      | TMED9      | B4GALT7                                     | ZFP62    | TRIM52           | SSR1     | C6orf228         |             |      |
| ZSCAN12P1      |                            | TRIM27     | TUBB       | C6orf25                                     | VARS     | NUDT3            | PPIL1    | BYSL             | GPR110      |      |
| BEN6           | LINC00472                  |            | PGM3       | LATS1                                       | MRPL18   | MICALL2          | TSPAN13  | C7orf46          | STK31       | CYCS |
| RALA           | PURB                       | SNORA5A    | IGFBP3     | LANCL2                                      | PSPH     | C7orf53          | AASS     | CEP41            | LUC7L2      |      |
| OR2A7          | ABCB8                      | SMARCD3    | PINX1      | NEIL2                                       | FAM160B2 |                  | POLR3D   | R3HCC1           | PPP2R2A     |      |
| GTF2E2         | PPAPDC1B                   |            | AP3M2      | C8orf46                                     | RNF19A   | GAPDHP62         |          | GRHL2            | BAALC       |      |
| NUDCD1         | ATAD2                      | LRR6       | BOP1       | KLHL9                                       | DNAJA1   | VCP              | MCART1   | C9orf41          | RFK         | OMD  |
| C9orf156       |                            | NANS       | ALG2       | FSD1L                                       | HDHD3    | RBM18            | ZBTB26   | PRPS1P2          | CCBL1       |      |
| METTL11A       |                            | SURF4      | INPP5E     | SLC6A2                                      | FBOXO18  | CEL2F            | SUV39H2  | PBLD             | AP3M1       |      |
| CYP2C9         | ZDHHC16                    | OCRL       | TACC2      | TRIM68                                      | UBQLNL   | MRPL17           | NLRP14   | COPB1            | CAPRIN1     |      |

Stable4\_20PerPair

|                                  |            |           |                      |                  |          |                                               |          |                   |          |      |
|----------------------------------|------------|-----------|----------------------|------------------|----------|-----------------------------------------------|----------|-------------------|----------|------|
| SLC35C1                          | B3GAT3     | C11orf84  | STIP1                | FKBP2            | GPR137   | PPP2R5B                                       | SYVN1    | RBM14             |          |      |
| PITPNM1                          | NUMA1      | CLPB      | CHCHD8               | KCNE3            | CHORDC1  | PAFAH1B2                                      | HMBS     | DPAGT1            |          |      |
| TBCEL                            | HSPA8      | MSANTD2   | STT3A                | HYLS1            | RAD52    | FKBP4                                         | TEAD4    | HIN1L             | NOP2     |      |
| CLEC1A                           | KIAA1467   |           | REP15                | PPHLN1           | PUS7L    | H1FNT                                         | TUBA1C   | FMNL3             | TARBP2   | NPFF |
| RAB5B                            | CNPY2      | PAN2      | METTL1               | METTL21B         |          | TBC1D30                                       | TSPAN8   | DCN               | NR2C1    |      |
| IKBIP                            | MTERFD3    | C12orf34  |                      | ANAPC7           | ATXN2    | ALDH2                                         | DYNLL1   | PUS1              | GOLGA3   | U6   |
| GTF3A                            | FANCB      | RFC3      | KBTBD6               | DHRS12           | SUGT1    | DNAJC3-AS1                                    |          | DNAJC3            | RAP2A    |      |
| SLC15A1                          | TMTC4      | CARKD     | PROZ                 | PCID2            | FAM70B   | DAD1                                          | MRPL52   | PRMT5-AS1         |          |      |
| PRMT5                            | PSME2      | NEDD8     | EAPP                 | GNPNAT1          | CDKN3    | SOCS6                                         | AHSA1    | C14orf142         |          |      |
| HSP90AA1                         |            | ZFYVE19   | TP53BP1              | FBN1             | GABPB1   | NEDD4                                         | NARG2    | RORA              | PARP16   |      |
| SKOR1                            | IL16       | PRC1      | SELS                 | TMEM8A           | SOLH     | HN1L                                          | IGFALS   | TRAF7             | ATF7IP2  |      |
| USP31                            | UBFD1      | TBX6      | PHKG2                | ZNF267           | ABCC11   | SALL1                                         | BBS2     | GPR56             | C16orf57 |      |
| E2F4                             | NUTF2      | FTLP14    | CYB5B                | CHST4            | BCAR1    | C16orf46                                      |          | AFG3L1P           | GAS8     |      |
| CYB5D2                           | RPAIN      | COX10-AS1 |                      | SLC47A2          | MAP2K3   | KSR1                                          | PIPOX    | UTP6              | SLFN11   |      |
| MMP28                            | CCL16      | LEPREL4   | LSM12                | ATXN7L3          | SLC25A39 |                                               | PNPO     | CDK5RAP3          |          | DDX5 |
| HN1                              | QRICH2     | AFMID     | CBX8                 | SIRT7            | PYCR1    | CSNK1D                                        | C17orf62 |                   | NARF     | FN3K |
| TBCD                             | TMEM241    | RPRD1A    | MBD1                 | ZADH2            | ZNF555   | TLE2                                          | NCLN     | ELAVL1            | ZNF562   | PPAN |
| ZGLP1                            | ELOF1      | ZNF440    | DNASE2               | TRMT1            | JAK3     | MPV17L2                                       | LSM4     | YJEFN3            | KCTD15   |      |
| FXYD1                            | ZNF146     | ZNF260    | MIA                  | SMG9             | BLOC1S3  | VASP                                          | MYPOP    | NOVA2             | PTGIR    |      |
| DHX34                            | PRMT1      | PTOV1     | CTU1                 | ZNF761           | ISOC2    | ZNF550                                        | ZNF814   | FKBP1A            | FOXA2    | GZF1 |
| ENTPD6                           | NANP       | HM13      | ZNF341               | EDEM2            | RPN2     | EMILIN3                                       | YWHAB    | TOMM34            | KRT18P4  |      |
| DPH3P1                           | TMEM50B    | UBE2L3    | SDF2L1               | ZNF70            | UPB1     | GAL3ST1                                       | SGSM3    | RP6               | ALG12    |      |
| CRELD2                           | TRABD      | TUBGCP6   | HDHD1                | RAI2             | MAOB     | ZNF673                                        | ZNF81    | ZNF630            | WDR13    |      |
| RRAGB                            | MAGT1      | PGK1      | ARMCX4               | ARMCX2           | NKRF     | PHF6                                          | MOSPD1   | FAM50A            |          |      |
| GOBPID                           | Pvalue     | OddsRatio | ExpCount             | Count            | Size     | Term                                          |          |                   |          |      |
| GO:0006487                       | 15         | 92        | 4.10627332612179e-09 | 8.30734614929144 |          | protein N-linked glycosylation                |          | 2.19002145180264  |          |      |
| GO:0018279                       | 13         | 87        | 1.31551960315768e-07 | 7.44790560953703 |          | protein N-linked glycosylation via asparagine |          | 2.07099854681337  |          |      |
| GO:0018196                       | 13         | 88        | 1.51082844816065e-07 | 7.34807653575025 |          | peptidyl-asparagine modification              |          | 2.09480312781122  |          |      |
| GO:0006457                       | 20         | 216       | 2.30035398870351e-07 | 4.38114134542706 |          | protein folding                               |          | 5.14178949553664  |          |      |
| GO:0006986                       | 14         | 129       | 2.37363259406325e-06 | 5.16173913043478 |          | response to unfolded protein                  |          | 3.07079094872327  |          |      |
| GO:0035966                       | 14         | 136       | 4.4510566391263e-06  | 4.86313959264779 |          | response to topologically incorrect protein   |          | 3.23742301570826  |          |      |
| GO:0070085                       | 19         | 255       | 1.16383774428643e-05 | 3.43610169491525 |          | glycosylation                                 |          | 6.07016815445298  |          |      |
| Tissue: Muscle_skeletal=>Thyroid |            |           |                      |                  |          | Type: asymmetric                              |          |                   |          |      |
| SourceGene:                      |            |           |                      |                  |          | LMOD3(ENSG00000163380.11)                     |          |                   |          |      |
| TargetGeneSet:                   | MEGF6      | ANGPTL7   | FAM46B               | COL16A1          | CYP4B1   | NEXN                                          | RP11     | OLFML3            | NGF      |      |
| FCGR1A                           | S100A10    | HAPLN2    | ATP1A2               | ANGPTL1          | GLT25D2  | DISC1                                         | RP4      | LYST              | NID1     | RHOB |
| ITSN2                            | VIT        | EHBP1     | FIGN                 | PDE11A           | SESTD1   | ZNF385B                                       | PID1     | EFHD1             | CXCR7    |      |
| PGAM1P4                          | CIDEC      | PPARG     | VIPR1                | CLEC3B           | TNNC1    | ALDH1L1                                       | MBNL1    | MME               | MME-AS1  |      |
| ADIPOQ                           | ADIPOQ-AS1 |           | KLB                  | CORIN            | SEPT11   | USP53                                         | SH3D19   | NPY1R             | PDLIM3   |      |
| SLC12A7                          | PIK3R1     | GPR98     | LVRN                 | LOX              | SNCAIP   | SPOCK1                                        | ADRB2    | RP1               | MYO1G    | EGFR |
| CTB                              | AZGP1      | NYAP1     | CAV1                 | WNT2             | LEP      | LCP1                                          | OSR2     | MAMDC2            | OMD      |      |
| HDHD3                            | GSN        | ARHGAP21  |                      | SFRP5            | ADD3     | EBF3                                          | INPP5A   | TNNT3             | H19      |      |
| PDE3B                            | CAPRIN1    | CD44      | IL18BP               | POU2F3           | IGFBP6   | TSPAN8                                        | DCN      | MLXIP             | RXFP2    |      |
| DCLK1                            | CAB39L     | RN7SKP7   | PRKD1                | ZFYVE21          | TPM1     | PML                                           | MFGE8    | ANPEP             | NDRG4    |      |
| MMP28                            | PNMT       | CD300LG   | C17orf62             |                  | CABLES1  | CYB5A                                         | COL5A3   | CACNA1A           | JAK3     |      |
| FOXA2                            | CST3       | EXOSC3P1  |                      | MTND1P10         |          | RP3                                           | PMM1     | WNT7B             | MIR221   |      |
| FAAH2                            | ITM2A      | TBX22     | DRP2                 | ZBTB33           | AFF2     | MAMLD1                                        | PDZD4    |                   |          |      |
| GOBPID                           | Pvalue     | OddsRatio | ExpCount             | Count            | Size     | Term                                          |          |                   |          |      |
| GO:0044057                       | 14         | 417       | 1.48109479301536e-06 | 5.44316502634734 |          | regulation of system process                  |          | 2.97218185592693  |          |      |
| GO:0008217                       | 8          | 127       | 3.37093466593401e-06 | 10.0691729323308 |          | regulation of blood pressure                  |          | 0.905196872188776 |          |      |
| Tissue: Muscle_skeletal=>Thyroid |            |           |                      |                  |          | Type: cluster                                 |          |                   |          |      |
| SourceGene:                      |            |           |                      |                  |          | MTND1P23(ENSG00000225972.1)                   |          |                   |          |      |
| TargetGeneSet:                   | WASH7P     | MTND1P23  |                      | MTND2P28         |          | AURKAIP1                                      | RP13     | LZIC              |          |      |
| DFFA                             | SNORA59A   |           | DNAJC16              | RP11             | PAQR7    | RP1                                           | WASF2    | EYA3              | PHACTR4  |      |

Stable4\_20PerPair

|                                  |          |              |           |                      |           |                  |          |                  |            |
|----------------------------------|----------|--------------|-----------|----------------------|-----------|------------------|----------|------------------|------------|
| SNRNP40                          | MFI2     | NSUN4        | SELRC1    | NFIA                 | NSRP1P1   | RP4              | U6       | RBMXL1           | TAF13      |
| MRPL53P1                         |          | BCAS2        | BCL9      | LCE2B                | GATAD2B   | JTB              | MIR555   | ETV3             | KIRREL-IT1 |
| HMG1P4                           | TROVE2   | KRT8P29      | FAM108A4P | ZC3H11B              | FTH1P2    |                  | HMG2P19  |                  | AKT3-IT1   |
| C2orf18                          | PPP1CB   | WDR43        | AAK1      | C2orf68              | EIF5B     | MZT2B            | H3F3AP4  | KRT18P29         |            |
| CYP20A1                          | RQCD1    | CLN5         | CAPN10    | ARPC4                | RPL29     | PSMC1P1          | KIAA2018 |                  | ZBTB20     |
| POU5F1P6                         |          | ATP5G1P3     |           | GMPS                 | RNF168    | SENP5            | PSAPL1   | HSP90AB2P        |            |
| RELL1                            | RAC1P2   | ANKRD17      | EIF4E     | CTD                  | NUP155    | EMB              | SREK1IP1 |                  | CENPK      |
| ANKRA2                           | PHAX     | C5orf15      | CTB       | MTND5P11             |           | KDM3B            | ZMAT2    | RBM27            | RANP1      |
| C6orf47                          | AGPAT1   | RXR8         | TAF8      | RPL7L1               | CDC5L     | RP3              | MTRNR2L9 |                  | FKBP1C     |
| PHACTR2                          | ARID1B   | WTAP         | BRAT1     | FOXK1                | AP5Z1     | POLR2J4          | RPL35P5  | RPS3AP26         |            |
| ZKSCAN5                          | RPL19P12 |              | CBLL1     | RN5S245              | ZNF212    | LSM12P1          | FAM150A  | JPH1             | KIAA1429   |
| ST13P6                           | PTK2     | LRRRC19      | FAM22G    | ZNF462               | SKA2L     | DPM2             | PRRC2B   | FRMD4A           | DCLRE1C    |
| YWHAZP3                          | PRINS    | POLR3A       | RPS3AP5   | NHP2P1               | EIF2S2P3  |                  | FBXL15   | PRDX3            | OR52E8     |
| TMEM9B                           | MTRNR2L8 |              | MRV11-AS1 |                      | ATG13     | ARHGAP1          | C11orf31 |                  | HNRNPUL2   |
| MARK2                            | BAD      | SF1          | RPL37P2   | ACER3                | RSF1      | FAM76B           | CWF19L2  | SDHD             | PAFAH1B2   |
| DDX6                             | ERC1     | KIAA0528     |           | ARID2                | SMARCD1   | CERS5            | SLC11A2  | CBX5             | MRS2P2     |
| LRRIQ1                           | BRAP     | PARP4-AS1    |           | RBM22P2              | MFAP1P1   | N4BP2L2-IT1      |          | TDRD3            | ARGLU1     |
| RNASE4                           | ACIN1    | PRPF39       | GNPNAT1   | DLST                 | ZFYVE21   | RPS26P49         |          | GOLGA8IP         | TJP1       |
| HMG2P5                           | MGA      | VPS39        | HMG2P46   |                      | FAM96A    | MTFMT            | IDH3A    | IQGAP1           | CRTC3      |
| CHTF18                           | EMP2     | PKD1P1       | DCTN5     | C16orf53             |           | SULT1A3          | CD2BP2   | UBE2MP1          | DNAJA2     |
| FTO-IT1                          | NOL3     | NFATC3       | CIRH1A    | VPS4A                | YWHAE     | METTL16          | RNASEK   | VAMP2            | NCOR1      |
| TP53I13                          | TAF15    | C17orf96     |           | FBXL20               | MED1      | WIPF2            | IGFBP4   | FAM134C          | PSME3      |
| KANSL1                           | KPNB1    | ZNF652       | KAT7      | RPS2P48              | SCARNA20  |                  | MED13    | GH1              | SLC38A10   |
| ANAPC11                          | MYL12B   | MPPE1        | SERPINB7  |                      | ZNF407    | C19orf24         |          | NFIC             | CRB3       |
| ZNF562                           | FBXL12   | ZNF791       | BRD4      | ZNF429               | ZNF568    | NOVA2            | ZNF480   | ZNF813           | ZNF543     |
| ZNF544                           | ZSCAN22  | CRNKL1       | SCAND1    | TSHZ2                | RPL12P4   | RAB22A           | NDUFV3   | FAM108A5P        | CTA        |
| TTC28                            | SF3A1    | MYH9         | TOMM22    | RPS19BP1             |           | TRABD            | ARSA     | PRDX4            | USP9X      |
| OTUD5                            | GNL3L    | TLE1P1       | RPSAP14   | HK2P1                | MTND4P24  |                  | MMGT1    |                  | RP6        |
| GOBPID                           | Pvalue   | OddsRatio    |           | ExpCount             |           | Count            | Size     | Term             |            |
| GO:0006397                       | 18       | 399          |           | 5.91291960082991e-07 |           | 4.53119739342927 |          | 4.50051899522524 |            |
|                                  |          |              |           |                      |           |                  |          |                  |            |
| GO:0008380                       | 15       | 323          |           | 3.81086233695306e-06 |           | 4.60029835029835 |          | 3.64327728184901 |            |
|                                  |          |              |           |                      |           |                  |          |                  |            |
| Tissue: Muscle_skeletal=>Thyroid |          |              |           |                      |           |                  |          |                  |            |
| SourceGene:                      |          |              |           |                      |           |                  |          |                  |            |
| TargetGeneSet:                   |          |              |           |                      |           |                  |          |                  |            |
| SNRNP40                          | TXLNA    | NCN          | AKIRIN1   | KIF2C                | LDLRAD1   | PGM1             | CCBL2    | KCNB3            | SEC22B     |
| GOLPH3L                          | PYG02    | MIR555       | UBQLN4    | CCT3                 | CDC73     | KRT8P29          | ACBD3    | ZNF678           | URB2       |
| ZNF238                           | DNMT3A   | DPYSL5       | SLC5A6    | PPM1G                | ARHGFEF33 |                  | MSH6     | FBXO11           | REL        |
| PCBP1-AS1                        |          | PCBP1        | MOB1A     | SH2D6                | MRPS5     | TBC1D8           | MAP4K4   | MFSD9            | TMEM182    |
| POLR1B                           | MYO7B    | SMPD4        | GORASP2   | HSPD1                | C2orf69   | CREB1            | METTL21A |                  | FZD5       |
| TTLL4                            | NHEJ1    | HMGB1P3      | PRRT3-AS1 |                      | LARS2     | TMEM89           | WDR6     | ZBTB11           | ZBTB20     |
| TMEM39A                          | COPG1    | H1FX-AS1     |           | MED12L               | SLC33A1   | GMPS             | MCCC1    | ZNF141           | TMEM128    |
| TADA2B                           | EXOC7    | ANKRD17      | EIF4E     | COL25A1              | SEC24D    | IRF2             | SLC12A7  | FAM105B          | SNX18      |
| KIF2A                            | PAPD4    | EPB41L4A-AS1 |           | DTWD2                | SRFBP1    | SEC24A           | CTB      | ADRB2            | CAMK2A     |
| FAM114A2                         |          | MFAP3        | FBXW11    | TMED9                | ZSCAN12P1 |                  | TRIM27   | HCG18            | SNORD48    |
| SRPK1                            | BRPF3    | BYSL         | PGM3      | UBE2J1               | TSPYL4    | LATS1            | RSPH3    | FAM120B          | HUS1       |
| BAZ1B                            | ZKSCAN1  | SH2B2        | METTL2A   | MTPN                 | EPHA1     | ZNF786           | NEIL2    | LCP1             | POLR3D     |
| CHMP7                            | EXTL3    | LSM12P1      | WHSC1L1   | KAT6A                | LRRC6     | EIF2C2           | EEF1D    | NRBP2            | BOP1       |
| DNAJA1                           | ATP8B5P  | DCAF10       | FAM22G    | NANS                 | ALG2      | MRPL50           | TTLL11   | NEK6             | OLFML2A    |
| METTL11A                         |          | SURF4        | TUBB4B    | OPTN                 | AP3M1     | ALDH18A1         |          | CC2D2B           | RRP12      |
| ENTPD7                           | ZDHHC6   | NHLRC2       | MRPL17    | SPTY2D1              | LIN7C     | CAPRIN1          | TRIM44   | ZBTB3            | C11orf84   |
| MARK2                            | STIP1    | GPR137       | GPHA2     | SYVN1                | RBM14     | CLPB             | PRSS23   | CHORDC1          | DDX6       |
| HSPA8                            | FKBP4    | RP4          | GNB3      | ASUN                 | PUS7L     | DDX23            | TIMELESS |                  | TMEM194A   |
| METTL1                           | SLC16A7  | TBC1D30      | HELB      | C12orf34             |           | ATXN2            | C12orf65 |                  | SBNO1      |
| GOLGA3                           | LNX2     | COG3         | TPTE2P3   | DNAJC3               | TTC5      | RBM23            | ARHGAP5  | HMGB1P14         |            |
| SYNJ2BP                          | MAP3K9   | ZC3H14       | BTBD7     | CYP46A1              | WDR25     | HSP90AA1         |          | TRAF3            | NIPA2      |
| TP53BP1                          | PIGB     | PARP16       | IDH3A     | C15orf38             |           | SOLH             | CLDN9    | MTRNR2L4         | MGA        |
| EARS2                            | DCTN5    | TAOK2        | SRCAP     | DNAJA2               | BCAR1     | C16orf46         |          | ZC3H18           | VPS53      |
| PELP1                            | SHISA6   | ALKBH5       | C17orf108 |                      | MMP28     | CNTNAP1          | PSME3    | UBTF             | UBE2Z      |
| PPP1R9B                          | DCAF7    | CANT1        | CSNK1D    | FOXK2                | RP13      | GNAL             | ZNF397   | TPGS2            | MBD1       |
| APP3D1                           | ZNF555   | SEMA6B       | TNFSF14   | ZNF121               | ZNF562    | ZNF441           | BRD4     | JAK3             | PIK3R2     |
| MPV17L2                          | ARMC6    | GATAD2A      | ZNF91     | MAP3K10              | SMG9      | DHX34            | PRMT1    | ZNF347           | PEG3       |

Stable4\_20PerPair

| ZNF587         | ZNF417                   | SEC23B                                                             | FOXA2            | ZNF341            | NCOA5      | ADNP         | C20orf201       | FAM207CP            |
|----------------|--------------------------|--------------------------------------------------------------------|------------------|-------------------|------------|--------------|-----------------|---------------------|
| URB1           | C21orf59                 |                                                                    | OLIG1            | RPS5P2            | PRDM15     | UBE2G2       | KRT18P5 HIC2    | ZNF70 XBP1          |
| PRR14L         | GGA1                     | TCF20                                                              | RP6              | TMSB4X            | ZNF81      | SMC1A        | MAGEH1 KIAA2022 | MID2                |
| ZBTB33         | CUL4B                    | XIAP                                                               | HCFC1            |                   |            |              |                 |                     |
| GOBPID         | Pvalue                   | OddsRatio                                                          | ExpCount         |                   |            | Count        | Size            | Term                |
| Tissue:        | Muscle_skeletal=>Thyroid |                                                                    |                  | Type:             | asymmetric |              |                 |                     |
| SourceGene:    | NR1I3(ENSG00000143257.7) |                                                                    |                  |                   |            |              |                 |                     |
| TargetGeneSet: | SEPT2P1                  | KCNA3                                                              | FAM46C           | SLAMF7            | PTPRC      | IGKV1OR2-118 | EOMES           |                     |
| TRAT1          | CD96                     | GZMA                                                               | GPSM3            | RP1               | TAGAP      | CARD11       | ARL4A           | TRGC1 TRGV4         |
| PLEKHA2        | CHRNA6                   | RP11                                                               | APBB1IP          | PRF1              | CD59       | CD3E         | CD3D            | SPIC LCP1           |
| TRAV2          | IGHV6-1                  | IGHV3-49                                                           | IGHV4OR15-8      | RASGRP1           | ITGAL      | TNK1         | CCL5            |                     |
| TMIGD2         | MYO1F                    | ADAM33                                                             | IL2RB            | CENPM             | PIM2       | IL2RG        | MTCP1           |                     |
| GOBPID         | Pvalue                   | OddsRatio                                                          | ExpCount         |                   |            | Count        | Size            | Term                |
| GO:0046649     | 9                        | 3.64642720047823e-07                                               | 12.3767688679245 |                   |            |              |                 | 0.988789703134731   |
|                | 433                      | lymphocyte activation                                              |                  |                   |            |              |                 |                     |
| GO:0042102     | 5                        | 3.66187242958608e-07                                               | 42.0286885245902 |                   |            |              |                 | 0.150716213410837   |
|                | 66                       | positive regulation of T cell proliferation                        |                  |                   |            |              |                 |                     |
| GO:0042110     | 8                        | 4.43334223453641e-07                                               | 14.5152411575563 |                   |            |              |                 | 0.728461698152377   |
|                | 319                      | T cell activation                                                  |                  |                   |            |              |                 |                     |
| GO:0002252     | 8                        | 1.86362804014922e-06                                               | 11.8857142857143 |                   |            |              |                 | 0.881461490554287   |
|                | 386                      | immune effector process                                            |                  |                   |            |              |                 |                     |
| GO:0050870     | 6                        | 2.13674031793135e-06                                               | 19.1959595959596 |                   |            |              |                 | 0.390492007473531   |
|                | 171                      | positive regulation of T cell activation                           |                  |                   |            |              |                 |                     |
| GO:0050671     | 5                        | 2.38586772474431e-06                                               | 28.1142072213501 |                   |            |              |                 | 0.219223583143035   |
|                | 96                       | positive regulation of lymphocyte proliferation                    |                  |                   |            |              |                 |                     |
| GO:0032946     | 5                        | 2.51146686554061e-06                                               | 27.8066770186335 |                   |            |              |                 | 0.221507162134108   |
|                | 97                       | positive regulation of mononuclear cell proliferation              |                  |                   |            |              |                 |                     |
| GO:0050852     | 5                        | 2.77825602583929e-06                                               | 27.2112462006079 |                   |            |              |                 | 0.226074320116255   |
|                | 99                       | T cell receptor signaling pathway                                  |                  |                   |            |              |                 |                     |
| GO:0051249     | 7                        | 2.8322941466464e-06                                                | 13.7951505016722 |                   |            |              |                 | 0.646252854473739   |
|                | 283                      | regulation of lymphocyte activation                                |                  |                   |            |              |                 |                     |
| GO:0070665     | 5                        | 2.91975102891644e-06                                               | 26.9229323308271 |                   |            |              |                 | 0.228357899107328   |
|                | 100                      | positive regulation of leukocyte proliferation                     |                  |                   |            |              |                 |                     |
| GO:0042129     | 101                      | 3.06685408569195e-06                                               | 26.640625        | 0.230641478098401 |            |              |                 | 5                   |
|                |                          | regulation of T cell proliferation                                 |                  |                   |            |              |                 |                     |
| GO:0002694     | 321                      | 6.49763083231527e-06                                               | 12.093091621754  | 0.733028856134524 |            |              |                 | 7                   |
|                |                          | regulation of leukocyte activation                                 |                  |                   |            |              |                 |                     |
| GO:0042098     | 5                        | 6.59049025861439e-06                                               | 22.6058786346397 |                   |            |              |                 | 0.269462320946647   |
|                | 118                      | T cell proliferation                                               |                  |                   |            |              |                 |                     |
| GO:0045061     | 3                        | 7.21868328547381e-06                                               | 102.885714285714 |                   |            |              |                 | 0.0388208428482458  |
|                | 17                       | thymic T cell selection                                            |                  |                   |            |              |                 |                     |
| GO:0051251     | 6                        | 8.00881384652893e-06                                               | 15.1079213184476 |                   |            |              |                 | 0.490969483080756   |
|                | 215                      | positive regulation of lymphocyte activation                       |                  |                   |            |              |                 |                     |
| GO:0050851     | 5                        | 8.07333000487323e-06                                               | 21.6404358353511 |                   |            |              |                 | 0.280880215902014   |
|                | 123                      | antigen receptor-mediated signaling pathway                        |                  |                   |            |              |                 |                     |
| GO:0050863     | 6                        | 9.37404367992686e-06                                               | 14.6801033591731 |                   |            |              |                 | 0.504670957027195   |
|                | 221                      | regulation of T cell activation                                    |                  |                   |            |              |                 |                     |
| GO:0050865     | 7                        | 1.00205734608208e-05                                               | 11.2836538461538 |                   |            |              |                 | 0.783267593938136   |
|                | 343                      | regulation of cell activation                                      |                  |                   |            |              |                 |                     |
| GO:0002429     | 5                        | 1.1816084699071e-05                                                | 19.9358258928571 |                   |            |              |                 | 0.303716005812747   |
|                | 133                      | immune response-activating cell surface receptor signaling pathway |                  |                   |            |              |                 |                     |
| GO:0002696     | 6                        | 1.26720978076269e-05                                               | 13.8923152227117 |                   |            |              |                 | 0.532073904920075   |
|                | 233                      | positive regulation of leukocyte activation                        |                  |                   |            |              |                 |                     |
| GO:0050778     | 364                      | 1.47416451699015e-05                                               | 10.60407239819   | 0.831222752750675 |            |              |                 | 7                   |
|                |                          | positive regulation of immune response                             |                  |                   |            |              |                 |                     |
| GO:0050867     | 6                        | 1.49935907178376e-05                                               | 13.4700854700855 |                   |            |              |                 | 0.548058957857588   |
|                | 240                      | positive regulation of cell activation                             |                  |                   |            |              |                 |                     |
| GO:0038110     | 2                        | 1.51494826074357e-05                                               | 930.129032258065 |                   |            |              |                 | 0.00685073697321985 |
|                | 3                        | interleukin-2-mediated signaling pathway                           |                  |                   |            |              |                 |                     |
| GO:0002768     | 5                        | 1.73717388402897e-05                                               | 18.3440390544707 |                   |            |              |                 | 0.328835374714553   |
|                | 144                      | immune response-regulating cell surface receptor signaling pathway |                  |                   |            |              |                 |                     |
| GO:0050670     | 5                        | 1.73717388402897e-05                                               | 18.3440390544707 |                   |            |              |                 | 0.328835374714553   |
|                | 144                      | regulation of lymphocyte proliferation                             |                  |                   |            |              |                 |                     |



Stable4\_20PerPair

|                                  |                                                          |                                                                                      |                   |
|----------------------------------|----------------------------------------------------------|--------------------------------------------------------------------------------------|-------------------|
| GO:0032944                       | 1.7963050440714e-05                                      | 18.2117346938776                                                                     | 0.331118953705626 |
| 5                                | 145                                                      | regulation of mononuclear cell proliferation                                         |                   |
| Tissue: Muscle_skeletal=>Thyroid |                                                          | Type: cluster                                                                        |                   |
| SourceGene:                      | RP11-55L3.2(ENSG00000213493.3)                           |                                                                                      |                   |
| TargetGeneSet:                   | DNAJC11 UBIAD1 RP1 PAQR7 EYA3 PHACTR4 SNRNP40 HDAC1      |                                                                                      |                   |
| PRPF38A TARS2                    | METTL13 DHX9 PPM1G POLR1B CLN5 TEX264 WDR82 COPG1        |                                                                                      |                   |
| KDM5A PSMD2                      | BOD1L FIP1L1 KIT GARS SLC04C1 AP3S1 IK HAVCR2 RP3        |                                                                                      |                   |
| TMEM151B                         | POLR2J4 SUMF2 COPS6 CASP2 ADRA1D ELP3 TEX10 RNF20        |                                                                                      |                   |
| FKBP15 ATP6V1G1                  | EXOSC2 POLR3A NAT10 RP11 NUP160 GANAB TMEM179B           |                                                                                      |                   |
| VPS11 NCKAP1L                    | SUOX OBFC2B CENPC1P1 SART3 SUPT16H YLPM1 MGA MPI         |                                                                                      |                   |
| HIRIP3 RNF40                     | CTCF TMC07 SF3B3 DHX38 RP13 RPA1 TSR1 RNF167 TP53        |                                                                                      |                   |
| PFAS ERAL1                       | AP2B1 CDK12 PSME3 GPATCH8 EFTUD2 BCAS3 DCAF7 EIF4A3 MAU2 |                                                                                      |                   |
| IDH3B DDX27                      | PRPF6 LINC00515 ITGB2 L3MBTL2 XRCC6 SLC35A2 SMC1A        |                                                                                      |                   |
| GNL3L RBM41                      |                                                          |                                                                                      |                   |
| GOBPID                           | Pvalue                                                   | OddsRatio                                                                            | ExpCount          |
| GO:0008380                       | 9.38632128306859e-08                                     | 8.61430102587659                                                                     | 1.67635457753789  |
| 12                               | 323                                                      | RNA splicing                                                                         |                   |
| GO:0000377                       | 9.40777010348585e-08                                     | 11.2466296590008                                                                     | 1.05875025949761  |
| 10                               | 204                                                      | RNA splicing, via transesterification reactions with bulged adenosine as nucleophile |                   |
| GO:0000398                       | 9.40777010348585e-08                                     | 11.2466296590008                                                                     | 1.05875025949761  |
| 10                               | 204                                                      | nuclear mRNA splicing, via spliceosome                                               |                   |
| GO:0000375                       | 1.18048959291484e-07                                     | 10.9601855431001                                                                     | 1.08470002075981  |
| 10                               | 209                                                      | RNA splicing, via transesterification reactions                                      |                   |
| GO:0006397                       | 1.19572460637369e-07                                     | 7.59944843723884                                                                     | 2.07079094872327  |
| 13                               | 399                                                      | mRNA processing                                                                      |                   |
| Tissue: Muscle_skeletal=>Thyroid |                                                          | Type: asymmetric                                                                     |                   |
| SourceGene:                      | RP11-62901.2(ENSG00000261220.1)                          |                                                                                      |                   |
| TargetGeneSet:                   | NOC2L UBE2J2 DNAJC16 TCEB3 LYPLA2 TXLNA MARCKSL1         |                                                                                      |                   |
| S100BP SF3A3                     | CTPS EIF2B3 RP11 CDC7 ATXN7L2 AMPD2 KCND3 SLC39A1        |                                                                                      |                   |
| FLAD1 UBQLN4                     | CCT3 HAPLN2 PFKFB2 NOL10 ITSN2 DNMT3A SLC5A6 MRPS5       |                                                                                      |                   |
| SEMA4C MAP4K4                    | MTND5P28 IWS1 GORASP2 HSPD1 TTLL4 HMGB1P3 EFHD1 DPH3     |                                                                                      |                   |
| SLC25A38                         | ZDHHHC3 CDCP1 SEMA3F IFRD2 ARF4 PXX COPG1 H1FX-AS1       |                                                                                      |                   |
| MED12L GMPS                      | MCCC1 SLC12A7 ARSB GPR98 FSTL4 ADRB2 MAK TRIM27          |                                                                                      |                   |
| RANP1 PPP1R18                    | DAXX ITPR3 BRPF3 BYSL GPR110 SYTL3 HEATR2 CCZ1           |                                                                                      |                   |
| IGFBP3 PRKAG2                    | PINX1 GATA4 POLR3D INTS9 KLF10 NUDCD1 DERL1 EEF1D PLAA   |                                                                                      |                   |
| DNAJA1 DCAF12                    | CCL19 DCAF10 FXN NCBP1 CDK5RAP2 OLFML2A NUP188           |                                                                                      |                   |
| METTL11A                         | SURF4 GRIN1 NGB NUDT5 RRP12 ENTPD7 TMEM123 SPTY2D1       |                                                                                      |                   |
| CAPRIN1 CHST1                    | PATL1 CCDC86 C11orf84 MARK2 STIP1 IL18BP CLPB            |                                                                                      |                   |
| P2RY6 DDX10                      | ARCN1 HSPA8 FKBP4 RP4 NOP2 DDX23 METTL1 UTP20            |                                                                                      |                   |
| ATXN2 DHX37                      | PUS1 GOLGA3 RGCC ATP11A RBM23 EIF2B2 AHSA1 ZC3H14 CTD    |                                                                                      |                   |
| DUOXA1 DUOX1                     | SLTM PARP16 IDH3A SOLH CARHSP1 UBFD1 DCTN5 CD2BP2 MT1F   |                                                                                      |                   |
| CIRH1A BCAR1                     | COX4NB ZC3H18 TSR1 CYB5D2 C17orf51 C17orf108 UTP6        |                                                                                      |                   |
| CDK12 LEPREL4                    | CNTNAP1 PSME3 UBE2Z PPP1R9B FAM20A HN1 MRPL38 PTPN2      |                                                                                      |                   |
| ZNF397 MBD1                      | PTBP1 TNFSF14 ANGPTL4 ZNF121 ZNF441 EMR2 ANKLE1 JAK3     |                                                                                      |                   |
| CCDC124 MPV17L2                  | MAP3K10 ETHE1 BCL3 PRMT1 ZNF587 PAK7 TOMM34 RPL12P9      |                                                                                      |                   |
| EXOSC3P1                         | RUNX1 PRDM15 UBE2L3 HPS4 MORC2 GGA1 TCF20 ZNF81          |                                                                                      |                   |
| TSC22D3 RP13                     | TMSB4Y                                                   |                                                                                      |                   |
| GOBPID                           | Pvalue                                                   | OddsRatio                                                                            | ExpCount          |
| GO:0022613                       | 8.33411188747106e-08                                     | 6.92553975776725                                                                     | 2.31990865684036  |
| 14                               | 225                                                      | ribonucleoprotein complex biogenesis                                                 |                   |
| GO:0071843                       | 1.7581208002344e-07                                      | 6.4881646090535                                                                      | 2.46425852882153  |
| 239                              | cellular                                                 | component biogenesis at cellular level                                               | 14                |
| GO:0022618                       | 6.03014277432934e-06                                     | 9.27040026086248                                                                     | 0.979516988443706 |
| 8                                | 95                                                       | ribonucleoprotein complex assembly                                                   |                   |
| GO:0071826                       | 8.84007004973229e-06                                     | 8.76349059512797                                                                     | 1.03107051415127  |
| 8                                | 100                                                      | ribonucleoprotein complex subunit organization                                       |                   |
| Tissue: Muscle_skeletal=>Thyroid |                                                          | Type: asymmetric                                                                     |                   |
| SourceGene:                      | RP11-734I18.1(ENSG00000251129.1)                         |                                                                                      |                   |
| TargetGeneSet:                   | SDHC IFT172 CCDC104 RPL15 RPL29 MLF1 RP11 CC2D2A         |                                                                                      |                   |
| LAMTOR3 MTND5P11                 | CTB GNB2L1 EIF3E EIF3H ZNF618 RPL12 EEF1A1P5             |                                                                                      |                   |
| COX15 MRPL16                     | SLC48A1 RPL6 ASB16 RPL12P4 IFNGR2 EIF3L RPL3 RPS4X       |                                                                                      |                   |
| GOBPID                           | Pvalue                                                   | OddsRatio                                                                            | ExpCount          |

Stable4\_20PerPair

|                                                               |                                                        |                                                                     |                    |
|---------------------------------------------------------------|--------------------------------------------------------|---------------------------------------------------------------------|--------------------|
| GO:0006413                                                    | 8.94682028637923e-13                                   | 64.2182817182817                                                    | 0.241920974327036  |
| 9                                                             | 152                                                    | translational initiation                                            |                    |
| GO:000184                                                     | 4.72339942275701e-10                                   | 55.921875                                                           | 0.189398657532351  |
| 119                                                           |                                                        | nuclear-transcribed mRNA catabolic process, nonsense-mediated decay | 7                  |
| GO:0006415                                                    | 4.88666401663353e-09                                   | 59.5557093425606                                                    | 0.144834267524739  |
| 6                                                             | 91                                                     | translational termination                                           |                    |
| GO:0000956                                                    | 5.53154659155372e-09                                   | 38.5270061728395                                                    | 0.268977925403086  |
| 7                                                             | 169                                                    | nuclear-transcribed mRNA catabolic process                          |                    |
| GO:0006402                                                    | 7.93522129315348e-09                                   | 36.4762426900585                                                    | 0.283302193619819  |
| 7                                                             | 178                                                    | mRNA catabolic process                                              |                    |
| GO:0006414                                                    | 1.16321782613037e-08                                   | 51.0837789661319                                                    | 0.167116462528545  |
| 6                                                             | 105                                                    | translational elongation                                            |                    |
| GO:0006614                                                    | 1.16321782613037e-08                                   | 51.0837789661319                                                    | 0.167116462528545  |
| 6                                                             | 105                                                    | SRP-dependent cotranslational protein targeting to membrane         |                    |
| GO:0006613                                                    | 1.23176224574141e-08                                   | 50.5694117647059                                                    | 0.168708047885959  |
| 6                                                             | 106                                                    | cotranslational protein targeting to membrane                       |                    |
| GO:0045047                                                    | 1.23176224574141e-08                                   | 50.5694117647059                                                    | 0.168708047885959  |
| 6                                                             | 106                                                    | protein targeting to ER                                             |                    |
| GO:0072599                                                    | 1.23176224574141e-08                                   | 50.5694117647059                                                    | 0.168708047885959  |
| 6                                                             | 106                                                    | establishment of protein localization to endoplasmic reticulum      |                    |
| GO:0006401                                                    | 2.11025172744099e-08                                   | 31.4425505050505                                                    | 0.326274998270016  |
| 7                                                             | 205                                                    | RNA catabolic process                                               |                    |
| GO:0070972                                                    | 2.35052545672698e-08                                   | 45.1134453781513                                                    | 0.187807072174936  |
| 6                                                             | 118                                                    | protein localization to endoplasmic reticulum                       |                    |
| GO:0019080                                                    | 1.02708662569541e-07                                   | 34.7659229208925                                                    | 0.240329388969621  |
| 6                                                             | 151                                                    | viral genome expression                                             |                    |
| GO:0019083                                                    | 1.02708662569541e-07                                   | 34.7659229208925                                                    | 0.240329388969621  |
| 6                                                             | 151                                                    | viral transcription                                                 |                    |
| GO:0006612                                                    | 1.11068333584869e-07                                   | 34.2881152460984                                                    | 0.243512559684451  |
| 6                                                             | 153                                                    | protein targeting to membrane                                       |                    |
| GO:0043624                                                    | 1.11068333584869e-07                                   | 34.2881152460984                                                    | 0.243512559684451  |
| 6                                                             | 153                                                    | cellular protein complex disassembly                                |                    |
| GO:0043241                                                    | 1.34449694415459e-07                                   | 33.1486068111455                                                    | 0.251470486471524  |
| 6                                                             | 158                                                    | protein complex disassembly                                         |                    |
| GO:0034623                                                    | 2.38085620590658e-07                                   | 29.9579831932773                                                    | 0.27693585219016   |
| 6                                                             | 174                                                    | cellular macromolecular complex disassembly                         |                    |
| GO:0032984                                                    | 2.81460650567542e-07                                   | 29.081944916695                                                     | 0.284893778977233  |
| 179                                                           |                                                        | macromolecular complex disassembly                                  | 6                  |
| GO:0072594                                                    | 6.07562117312445e-07                                   | 25.3654188948307                                                    | 0.324683412912601  |
| 6                                                             | 204                                                    | establishment of protein localization to organelle                  |                    |
| GO:0019058                                                    | 1.25703115685503e-06                                   | 22.2792156862745                                                    | 0.367656217562798  |
| 6                                                             | 231                                                    | viral infectious cycle                                              |                    |
| GO:0022415                                                    | 2.49964104162857e-06                                   | 19.6952292728115                                                    | 0.413812192927825  |
| 6                                                             | 260                                                    | viral reproductive process                                          |                    |
| GO:0071845                                                    | 4.16356426373618e-06                                   | 17.9644519678375                                                    | 0.452010241505778  |
| 6                                                             | 284                                                    | cellular component disassembly at cellular level                    |                    |
| GO:0022411                                                    | 4.5129496406714e-06                                    | 17.7046307884856                                                    | 0.458376582935437  |
| 6                                                             | 288                                                    | cellular component disassembly                                      |                    |
| Tissue: Muscle_skeletal=>Thyroid                              |                                                        | Type: asymmetric                                                    |                    |
| SourceGene:                                                   | SMAD7(ENSG00000101665.3)                               |                                                                     |                    |
| TargetGeneSet:                                                | RP11 SEMA4A TTC24 FCRL5 FCRL2 KIF21B STAMBP IGKJ5 IGKC |                                                                     |                    |
| IGKJ2 IGKJ1 IGKV3-11 IGKV1-12 IGKV3-15 SP140 OR2A5            |                                                        |                                                                     |                    |
| CNTNAP2 SYT12 CRTAM ARHGAP9 GS1 TRDC IGHA2 IGHG2 IGHG1 GPR114 |                                                        |                                                                     |                    |
| IFT20 FAM209A IGLV3-10 IGLV2-8 IGLC2 IGLC3 MIAT               |                                                        |                                                                     |                    |
| GOBPID Pvalue OddsRatio ExpCount Count Size Term              |                                                        |                                                                     |                    |
| GO:0006958                                                    | 3.34410537044235e-09                                   | 122.974358974359                                                    | 0.0622794270292713 |
| 5                                                             | 50                                                     | complement activation, classical pathway                            |                    |
| GO:0006956                                                    | 1.09859748955005e-08                                   | 95.3249336870027                                                    | 0.0784720780568819 |
| 5                                                             | 63                                                     | complement activation                                               |                    |
| GO:0002455                                                    | 1.28906736371292e-08                                   | 92.1346153846154                                                    | 0.0809632551380527 |
| 5                                                             | 65                                                     | humoral immune response mediated by circulating immunoglobulin      |                    |
| GO:0002449                                                    | 3.60247991194033e-08                                   | 44.3229813664596                                                    | 0.208013286277766  |
| 6                                                             | 167                                                    | lymphocyte mediated immunity                                        |                    |

Stable4\_20PerPair

|                                  |                           |                                                                                                                           |                   |
|----------------------------------|---------------------------|---------------------------------------------------------------------------------------------------------------------------|-------------------|
| GO:0072376                       | 4.20414596204078e-08      | 71.7082917082917                                                                                                          | 0.102138260328005 |
| 5                                | 82                        | protein activation cascade                                                                                                |                   |
| GO:0002460                       | 5.8222716843612e-08       | 40.7371428571429                                                                                                          | 0.225451525845962 |
| 6                                | 181                       | adaptive immune response based on somatic recombination of immune receptors built from immunoglobulin superfamily domains |                   |
| GO:0002250                       | 9.92797013957539e-08      | 37.0859375                                                                                                                | 0.246626531035914 |
| 198                              |                           | adaptive immune response                                                                                                  | 6                 |
| GO:0002443                       | 1.44733874159179e-07      | 34.7024390243902                                                                                                          | 0.262819182063525 |
| 6                                | 211                       | leukocyte mediated immunity                                                                                               |                   |
| GO:0016064                       | 1.93212855523158e-07      | 51.9847605224964                                                                                                          | 0.138260328004982 |
| 5                                | 111                       | immunoglobulin mediated immune response                                                                                   |                   |
| GO:0019724                       | 2.20811624721492e-07      | 50.5434015525759                                                                                                          | 0.141997093626739 |
| 5                                | 114                       | B cell mediated immunity                                                                                                  |                   |
| GO:0002252                       | 2.2681262098458e-07       | 23.5975053969777                                                                                                          | 0.480797176665975 |
| 7                                | 386                       | immune effector process                                                                                                   |                   |
| GO:0006959                       | 3.09915170958394e-07      | 47.0611439842209                                                                                                          | 0.151961801951422 |
| 5                                | 122                       | humoral immune response                                                                                                   |                   |
| GO:0050778                       | 3.52128674649164e-06      | 19.6578212290503                                                                                                          | 0.453394228773095 |
| 6                                | 364                       | positive regulation of immune response                                                                                    |                   |
| Tissue: Muscle_skeletal=>Thyroid |                           | Type: asymmetric                                                                                                          |                   |
| SourceGene:                      | TBCAP3(ENSG00000249055.1) |                                                                                                                           |                   |
| TargetGeneSet:                   | ACAP3                     | ARHGEF10L                                                                                                                 | RPL11             |
| RGS4                             | KCNT2                     | TSSC1                                                                                                                     | RP11              |
| TFG                              | ATP6V1A                   | PFN2                                                                                                                      | DEFB131           |
| STARD4                           | PHF15                     | CAMLG                                                                                                                     | RPS14             |
| KLHDC3                           | UFL1                      | FOXO3                                                                                                                     | C7orf50           |
| DGAT1                            | CTD                       | GOLGA2                                                                                                                    | RPL7A             |
| CALCOCO1                         |                           | RPL41                                                                                                                     | ARL1              |
| SIPA1L1                          | TGFB3                     | FOXN3                                                                                                                     | TELO2             |
| BCAR1                            | C16orf7                   | TP53I13                                                                                                                   | RPL17             |
| ARHGDI3                          | ATP8B1                    | FBN3                                                                                                                      | ILVBL             |
| ARVCF                            | APOL2                     | TRABD                                                                                                                     | CCDC22            |
| GOBPID                           | Pvalue                    | OddsRatio                                                                                                                 | ExpCount          |
| GO:0006415                       | 2.4029949032464e-08       | 20.2579730687456                                                                                                          | 0.478582797038267 |
| 8                                | 91                        | translational termination                                                                                                 |                   |
| GO:0006414                       | 7.43372609414547e-08      | 17.3171619163129                                                                                                          | 0.552210919659539 |
| 8                                | 105                       | translational elongation                                                                                                  |                   |
| GO:0006614                       | 7.43372609414547e-08      | 17.3171619163129                                                                                                          | 0.552210919659539 |
| 8                                | 105                       | SRP-dependent cotranslational protein targeting to membrane                                                               |                   |
| GO:0006613                       | 8.00688636884317e-08      | 17.1392557022809                                                                                                          | 0.557470071275344 |
| 8                                | 106                       | cotranslational protein targeting to membrane                                                                             |                   |
| GO:0045047                       | 8.00688636884317e-08      | 17.1392557022809                                                                                                          | 0.557470071275344 |
| 8                                | 106                       | protein targeting to ER                                                                                                   |                   |
| GO:0072599                       | 8.00688636884317e-08      | 17.1392557022809                                                                                                          | 0.557470071275344 |
| 8                                | 106                       | establishment of protein localization to endoplasmic reticulum                                                            |                   |
| GO:0019080                       | 9.17468376821776e-08      | 13.4640529745638                                                                                                          | 0.794131893986575 |
| 9                                | 151                       | viral genome expression                                                                                                   |                   |
| GO:0019083                       | 9.17468376821776e-08      | 13.4640529745638                                                                                                          | 0.794131893986575 |
| 9                                | 151                       | viral transcription                                                                                                       |                   |
| GO:0070972                       | 1.84678499912722e-07      | 15.2566844919786                                                                                                          | 0.620579890665006 |
| 8                                | 118                       | protein localization to endoplasmic reticulum                                                                             |                   |
| GO:0000184                       | 1.97159417954415e-07      | 15.1181770005299                                                                                                          | 0.625839042280811 |
| 8                                | 119                       | nuclear-transcribed mRNA catabolic process, nonsense-mediated decay                                                       |                   |
| GO:0000956                       | 2.40668033314045e-07      | 11.9342350746269                                                                                                          | 0.888796623071068 |
| 9                                | 169                       | nuclear-transcribed mRNA catabolic process                                                                                |                   |
| GO:0006402                       | 3.73811607986339e-07      | 11.2915305131149                                                                                                          | 0.936128987613314 |
| 9                                | 178                       | mRNA catabolic process                                                                                                    |                   |
| GO:0006401                       | 1.22282571351335e-06      | 9.71756015839171                                                                                                          | 1.07812608124005  |
| 9                                | 205                       | RNA catabolic process                                                                                                     |                   |
| GO:0006413                       | 1.28258848919235e-06      | 11.6266339869281                                                                                                          | 0.799391045602381 |
| 8                                | 152                       | translational initiation                                                                                                  |                   |
| GO:0006612                       | 1.3476829986127e-06       | 11.5456389452333                                                                                                          | 0.804650197218186 |
| 8                                | 153                       | protein targeting to membrane                                                                                             |                   |

Stable4\_20PerPair

|                                  |                                                                     |                  |                   |
|----------------------------------|---------------------------------------------------------------------|------------------|-------------------|
| GO:0043624                       | 1.3476829986127e-06                                                 | 11.5456389452333 | 0.804650197218186 |
| 8 153                            | cellular protein complex disassembly                                |                  |                   |
| GO:0043241                       | 1.71710525455108e-06                                                | 11.156862745098  | 0.830945955297211 |
| 158                              | protein complex disassembly                                         |                  | 8                 |
| GO:0019058                       | 3.27711101709493e-06                                                | 8.56373537716821 | 1.21486402325099  |
| 9 231                            | viral infectious cycle                                              |                  |                   |
| GO:0034623                       | 3.53234654863319e-06                                                | 10.070163004961  | 0.915092381150093 |
| 174                              | cellular macromolecular complex disassembly                         |                  | 8                 |
| GO:0032984                       | 4.35900428544295e-06                                                | 9.77227382180943 | 0.941388139229119 |
| 8 179                            | macromolecular complex disassembly                                  |                  |                   |
| GO:0022415                       | 8.56194963266732e-06                                                | 7.55877980614854 | 1.36737942010933  |
| 9 260                            | viral reproductive process                                          |                  |                   |
| GO:0072594                       | 1.13913791253346e-05                                                | 8.51080432172869 | 1.07286692962425  |
| 8 204                            | establishment of protein localization to organelle                  |                  |                   |
| GO:0071845                       | 1.73410816782255e-05                                                | 6.88738127544098 | 1.49359905888866  |
| 9 284                            | cellular component disassembly at cellular level                    |                  |                   |
| GO:0022411                       | 1.93742077695957e-05                                                | 6.78671160327395 | 1.51463566535188  |
| 9 288                            | cellular component disassembly                                      |                  |                   |
| Tissue: Muscle_skeletal=>Thyroid | Type: cluster                                                       |                  |                   |
| SourceGene:                      | TBCAP3(ENSG00000249055.1)                                           |                  |                   |
| TargetGeneSet:                   | ACAP3 ARHGEF10L RPL11 LRRC8B SLC35A3 MAN1A2 OTUD7B LMNA             |                  |                   |
| RGS4 KCNT2                       | TSSC1 RP11 CCDC88A NR4A2 NPPC ARF4 PPIAP16 MAGI1-IT1                |                  |                   |
| TFG ATP6V1A                      | PFN2 DEFB131 TAPT1 MOB1B SEC31A SEC24D STOX2 C5orf27                |                  |                   |
| STARD4 PHF15                     | CAMLG RPS14 CNOT8 THG1L CPEB4 ELOVL2 RP3 CCND3                      |                  |                   |
| KLHDC3 UFL1                      | FOXO3 C7orf50 SLC29A4 ZCWPW1 TMEM168 MKRN1 ZYX FAM82B               |                  |                   |
| DGAT1 CTD                        | GOLGA2 RPL7A IL15RA STOX1 PTPRE PRMT3 DRAP1 NDUFS8 RPS3             |                  |                   |
| CALCOCO1                         | RPL41 ARL1 TCP11L2 VSIG10 RNU4-2 CHFR SCFD1 RPL32P29                |                  |                   |
| SIPA1L1 TGFB3                    | FOXN3 TELO2 ECI1 CLUAP1 RPS15A C16orf58 GPR56                       |                  |                   |
| BCAR1 C16orf7                    | TP53I13 RPL17 PLEKHH3 SUPT4H1 BTBD17 FAM100B C17orf70               |                  |                   |
| ARHGDIATP8B1                     | FBN3 ILVBL COPE RPS11 ISOC2 NECAB3 UCKL1 LINC00158                  |                  |                   |
| ARVCF APOL2                      | TRABD CCDC22 MAGED2 FOXO4 RP4 FAM199X                               |                  |                   |
| GOBPID                           | Pvalue OddsRatio ExpCount Count Size Term                           |                  |                   |
| GO:0006415                       | 2.4029949032464e-08                                                 | 20.2579730687456 | 0.478582797038267 |
| 8 91                             | translational termination                                           |                  |                   |
| GO:0006414                       | 7.43372609414547e-08                                                | 17.3171619163129 | 0.552210919659539 |
| 8 105                            | translational elongation                                            |                  |                   |
| GO:0006614                       | 7.43372609414547e-08                                                | 17.3171619163129 | 0.552210919659539 |
| 8 105                            | SRP-dependent cotranslational protein targeting to membrane         |                  |                   |
| GO:0006613                       | 8.00688636884317e-08                                                | 17.1392557022809 | 0.557470071275344 |
| 8 106                            | cotranslational protein targeting to membrane                       |                  |                   |
| GO:0045047                       | 8.00688636884317e-08                                                | 17.1392557022809 | 0.557470071275344 |
| 8 106                            | protein targeting to ER                                             |                  |                   |
| GO:0072599                       | 8.00688636884317e-08                                                | 17.1392557022809 | 0.557470071275344 |
| 8 106                            | establishment of protein localization to endoplasmic reticulum      |                  |                   |
| GO:0019080                       | 9.17468376821776e-08                                                | 13.4640529745638 | 0.794131893986575 |
| 9 151                            | viral genome expression                                             |                  |                   |
| GO:0019083                       | 9.17468376821776e-08                                                | 13.4640529745638 | 0.794131893986575 |
| 9 151                            | viral transcription                                                 |                  |                   |
| GO:0070972                       | 1.84678499912722e-07                                                | 15.2566844919786 | 0.620579890665006 |
| 8 118                            | protein localization to endoplasmic reticulum                       |                  |                   |
| GO:0000184                       | 1.97159417954415e-07                                                | 15.1181770005299 | 0.625839042280811 |
| 8 119                            | nuclear-transcribed mRNA catabolic process, nonsense-mediated decay |                  |                   |
| GO:0000956                       | 2.40668033314045e-07                                                | 11.9342350746269 | 0.888796623071068 |
| 9 169                            | nuclear-transcribed mRNA catabolic process                          |                  |                   |
| GO:0006402                       | 3.73811607986339e-07                                                | 11.2915305131149 | 0.936128987613314 |
| 9 178                            | mRNA catabolic process                                              |                  |                   |
| GO:0006401                       | 1.22282571351335e-06                                                | 9.71756015839171 | 1.07812608124005  |
| 9 205                            | RNA catabolic process                                               |                  |                   |
| GO:0006413                       | 1.28258848919235e-06                                                | 11.6266339869281 | 0.799391045602381 |
| 8 152                            | translational initiation                                            |                  |                   |
| GO:0006612                       | 1.3476829986127e-06                                                 | 11.5456389452333 | 0.804650197218186 |
| 8 153                            | protein targeting to membrane                                       |                  |                   |
| GO:0043624                       | 1.3476829986127e-06                                                 | 11.5456389452333 | 0.804650197218186 |

Stable4\_20PerPair

|                                                                |                                                                     |                                                             |                      |                   |                   |     |
|----------------------------------------------------------------|---------------------------------------------------------------------|-------------------------------------------------------------|----------------------|-------------------|-------------------|-----|
| 8                                                              | 153                                                                 | cellular protein complex disassembly                        | 1.71710525455108e-06 | 11.156862745098   | 0.830945955297211 | 8   |
| GO:0043241                                                     |                                                                     |                                                             |                      |                   |                   |     |
| 158                                                            | protein                                                             | complex disassembly                                         | 3.27711101709493e-06 | 8.56373537716821  | 1.21486402325099  |     |
| GO:0019058                                                     |                                                                     |                                                             |                      |                   |                   |     |
| 9                                                              | 231                                                                 | viral infectious cycle                                      | 3.53234654863319e-06 | 10.070163004961   | 0.915092381150093 | 8   |
| GO:0034623                                                     |                                                                     |                                                             |                      |                   |                   |     |
| 174                                                            | cellular                                                            | macromolecular complex disassembly                          | 4.35900428544295e-06 | 9.77227382180943  | 0.941388139229119 |     |
| GO:0032984                                                     |                                                                     |                                                             |                      |                   |                   |     |
| 8                                                              | 179                                                                 | macromolecular complex disassembly                          | 8.56194963266732e-06 | 7.55877980614854  | 1.36737942010933  |     |
| GO:0022415                                                     |                                                                     |                                                             |                      |                   |                   |     |
| 9                                                              | 260                                                                 | viral reproductive process                                  | 1.13913791253346e-05 | 8.51080432172869  | 1.07286692962425  |     |
| GO:0072594                                                     |                                                                     |                                                             |                      |                   |                   |     |
| 8                                                              | 204                                                                 | establishment of protein localization to organelle          | 1.73410816782255e-05 | 6.88738127544098  | 1.49359905888866  |     |
| GO:0071845                                                     |                                                                     |                                                             |                      |                   |                   |     |
| 9                                                              | 284                                                                 | cellular component disassembly at cellular level            | 1.93742077695957e-05 | 6.78671160327395  | 1.51463566535188  |     |
| GO:0022411                                                     |                                                                     |                                                             |                      |                   |                   |     |
| 9                                                              | 288                                                                 | cellular component disassembly                              |                      |                   |                   |     |
| Tissue: Muscle_skeletal=>Thyroid                               |                                                                     | Type: asymmetric                                            |                      |                   |                   |     |
| SourceGene:                                                    |                                                                     | U2(ENSG00000222389.1)                                       |                      |                   |                   |     |
| TargetGeneSet:                                                 |                                                                     | MAN1C1 RPS7 MFF JAGN1 BMP2K RP11 CTD PLEKHG4B               |                      |                   |                   |     |
| ATP6V0E1                                                       |                                                                     | CPEB4 RPL10A RPS3AP26 RPL35 RPL7A P2RX3 RPL6 CHKB           |                      |                   |                   |     |
| RPS15A FSCN2                                                   |                                                                     | TP53INP2                                                    |                      |                   |                   |     |
| GOBPID Pvalue                                                  |                                                                     | OddsRatio ExpCount Count Size Term                          |                      |                   |                   |     |
| GO:0006415                                                     |                                                                     | 4.01611449165716e-10                                        | 101.294117647059     |                   | 0.100754273060688 |     |
| 6                                                              | 91                                                                  | translational termination                                   |                      |                   |                   |     |
| GO:0006414                                                     |                                                                     | 9.61586459350121e-10                                        | 86.8848484848485     |                   | 0.11625493045464  |     |
| 6                                                              | 105                                                                 | translational elongation                                    |                      |                   |                   |     |
| GO:0006614                                                     |                                                                     | 9.61586459350121e-10                                        | 86.8848484848485     |                   | 0.11625493045464  |     |
| 6                                                              | 105                                                                 | SRP-dependent cotranslational protein targeting to membrane |                      |                   |                   |     |
| GO:0006613                                                     |                                                                     | 1.01867392935224e-09                                        | 86.01                | 0.117362120268494 | 6                 | 106 |
| cotranslational protein targeting to membrane                  |                                                                     |                                                             |                      |                   |                   |     |
| GO:0045047                                                     |                                                                     | 1.01867392935224e-09                                        | 86.01                | 0.117362120268494 | 6                 | 106 |
| protein targeting to ER                                        |                                                                     |                                                             |                      |                   |                   |     |
| GO:0072599                                                     |                                                                     | 1.01867392935224e-09                                        | 86.01                | 0.117362120268494 | 6                 | 106 |
| establishment of protein localization to endoplasmic reticulum |                                                                     |                                                             |                      |                   |                   |     |
| GO:0072594                                                     |                                                                     | 1.03536178759999e-09                                        | 56.2131979695431     |                   | 0.225866722026157 |     |
| 7                                                              | 204                                                                 | establishment of protein localization to organelle          |                      |                   |                   |     |
| GO:0070972                                                     |                                                                     | 1.95364559544598e-09                                        | 76.7303571428571     |                   | 0.130648398034738 |     |
| 6                                                              | 118                                                                 | protein localization to endoplasmic reticulum               |                      |                   |                   |     |
| GO:0000184                                                     |                                                                     | 2.05615156802194e-09                                        | 76.046017699115      | 0.131755587848592 |                   | 6   |
| 119                                                            | nuclear-transcribed mRNA catabolic process, nonsense-mediated decay |                                                             |                      |                   |                   |     |
| GO:0019080                                                     |                                                                     | 8.65497447098544e-09                                        | 59.1310344827586     |                   | 0.167185661891911 |     |
| 6                                                              | 151                                                                 | viral genome expression                                     |                      |                   |                   |     |
| GO:0019083                                                     |                                                                     | 8.65497447098544e-09                                        | 59.1310344827586     |                   | 0.167185661891911 |     |
| 6                                                              | 151                                                                 | viral transcription                                         |                      |                   |                   |     |
| GO:0006413                                                     |                                                                     | 9.00527408901662e-09                                        | 58.7219178082192     |                   | 0.168292851705764 |     |
| 6                                                              | 152                                                                 | translational initiation                                    |                      |                   |                   |     |
| GO:0006612                                                     |                                                                     | 9.36723534542493e-09                                        | 58.3183673469388     |                   | 0.169400041519618 |     |
| 6                                                              | 153                                                                 | protein targeting to membrane                               |                      |                   |                   |     |
| GO:0043624                                                     |                                                                     | 9.36723534542493e-09                                        | 58.3183673469388     |                   | 0.169400041519618 |     |
| 6                                                              | 153                                                                 | cellular protein complex disassembly                        |                      |                   |                   |     |
| GO:0043241                                                     |                                                                     | 1.13628486543256e-08                                        | 56.3802631578947     |                   | 0.174935990588887 |     |
| 6                                                              | 158                                                                 | protein complex disassembly                                 |                      |                   |                   |     |
| GO:0000956                                                     |                                                                     | 1.70119170987948e-08                                        | 52.5349693251534     |                   | 0.187115078541277 |     |
| 6                                                              | 169                                                                 | nuclear-transcribed mRNA catabolic process                  |                      |                   |                   |     |
| GO:0034623                                                     |                                                                     | 2.0256353412196e-08                                         | 50.9535714285714     |                   | 0.192651027610546 |     |
| 6                                                              | 174                                                                 | cellular macromolecular complex disassembly                 |                      |                   |                   |     |
| GO:0006402                                                     |                                                                     | 2.32062780153623e-08                                        | 49.7546511627907     |                   | 0.197079786865961 |     |
| 6                                                              | 178                                                                 | mRNA catabolic process                                      |                      |                   |                   |     |
| GO:0032984                                                     |                                                                     | 2.39967536614885e-08                                        | 49.4635838150289     |                   | 0.198186976679815 |     |
| 6                                                              | 179                                                                 | macromolecular complex disassembly                          |                      |                   |                   |     |
| GO:0006401                                                     |                                                                     | 5.38891409876322e-08                                        | 42.9226130653266     |                   | 0.226973911840011 |     |
| 6                                                              | 205                                                                 | RNA catabolic process                                       |                      |                   |                   |     |

Stable4\_20PerPair

|                               |                                                   |                                                                     |                   |
|-------------------------------|---------------------------------------------------|---------------------------------------------------------------------|-------------------|
| GO:0019058                    | 1.09526014563922e-07                              | 37.8933333333333                                                    | 0.255760847000208 |
| 6                             | 231                                               | viral infectious cycle                                              |                   |
| GO:0022415                    | 2.20453366736355e-07                              | 33.4984251968504                                                    | 0.287869351601965 |
| 6                             | 260                                               | viral reproductive process                                          |                   |
| GO:0033365                    | 3.40946410365617e-07                              | 23.3149737720553                                                    | 0.523700781952806 |
| 7                             | 473                                               | protein localization to organelle                                   |                   |
| GO:0006605                    | 3.45863552375854e-07                              | 23.2633832976445                                                    | 0.52480797176666  |
| 7                             | 474                                               | protein targeting                                                   |                   |
| GO:0071845                    | 3.70908453898079e-07                              | 30.5546762589928                                                    | 0.314441907134454 |
| 6                             | 284                                               | cellular component disassembly at cellular level                    |                   |
| GO:0022411                    | 4.02707066625748e-07                              | 30.1127659574468                                                    | 0.318870666389869 |
| 6                             | 288                                               | cellular component disassembly                                      |                   |
| GO:0016032                    | 5.48524295696051e-06                              | 18.8629213483146                                                    | 0.499342606048024 |
| 6                             | 451                                               | viral reproduction                                                  |                   |
| Tissue: Nerve_Tibial=>Thyroid | Type: asymmetric                                  |                                                                     |                   |
| SourceGene:                   | AK3(ENSG00000147853.10)                           |                                                                     |                   |
| TargetGeneSet:                | RPL22 RP3 CNKSR1 JTB RPS27 FAM78B NDUFB1P2        |                                                                     |                   |
| RPL14 RPL29                   | METTL15P1 RP11 RPS3A STK32A PCYOX1L PRELID1 DEK   |                                                                     |                   |
| EEF1A1 CASD1                  | RPS3AP26 PCOLCE RPL7 EEF1A1P5 RPL7A RPS3AP5       |                                                                     |                   |
| RPL27A CTD                    | COPS7A TFPC2 NACA RPL18AP3 SPG20OS LINC00571 FHP1 |                                                                     |                   |
| POLE2 CES3                    | LGALS9 RPL19 VPS25 EPX TCAM1 LRRC37A3 RPS15 DHPS  |                                                                     |                   |
| GLTSCR2 RPS5                  | MAFB RP4 PISD RPL3 RPS4X SPRY3                    |                                                                     |                   |
| GOBPID                        | Pvalue OddsRatio ExpCount Count Size Term         |                                                                     |                   |
| GO:0006414                    | 9.52400953644563e-22                              | 104.945054945055                                                    | 0.254307660369525 |
| 14                            | 105                                               | translational elongation                                            |                   |
| GO:0006415                    | 1.3235913401609e-20                               | 108.621212121212                                                    | 0.220399972320255 |
| 13                            | 91                                                | translational termination                                           |                   |
| GO:0006614                    | 9.4483628916079e-20                               | 92.001976284585                                                     | 0.254307660369525 |
| 105                           | 13                                                | SRP-dependent cotranslational protein targeting to membrane         | 13                |
| GO:0006613                    | 1.07537836841364e-19                              | 91.0063538611926                                                    | 0.25672963808733  |
| 13                            | 106                                               | cotranslational protein targeting to membrane                       |                   |
| GO:0045047                    | 1.07537836841364e-19                              | 91.0063538611926                                                    | 0.25672963808733  |
| 13                            | 106                                               | protein targeting to ER                                             |                   |
| GO:0072599                    | 1.07537836841364e-19                              | 91.0063538611926                                                    | 0.25672963808733  |
| 13                            | 106                                               | establishment of protein localization to endoplasmic reticulum      |                   |
| GO:0070972                    | 4.62144617185643e-19                              | 80.5380952380952                                                    | 0.28579337070099  |
| 13                            | 118                                               | protein localization to endoplasmic reticulum                       |                   |
| GO:0000184                    | 5.18084198822889e-19                              | 79.7727272727273                                                    | 0.288215348418795 |
| 13                            | 119                                               | nuclear-transcribed mRNA catabolic process, nonsense-mediated decay |                   |
| GO:0019080                    | 1.2693059713826e-17                               | 61.1376811594203                                                    | 0.365718635388554 |
| 13                            | 151                                               | viral genome expression                                             |                   |
| GO:0019083                    | 1.2693059713826e-17                               | 61.1376811594203                                                    | 0.365718635388554 |
| 13                            | 151                                               | viral transcription                                                 |                   |
| GO:0006413                    | 1.38603847599456e-17                              | 60.6935905820798                                                    | 0.368140613106359 |
| 13                            | 152                                               | translational initiation                                            |                   |
| GO:0006612                    | 1.51258162845701e-17                              | 60.2558441558442                                                    | 0.370562590824164 |
| 13                            | 153                                               | protein targeting to membrane                                       |                   |
| GO:0043624                    | 1.51258162845701e-17                              | 60.2558441558442                                                    | 0.370562590824164 |
| 13                            | 153                                               | cellular protein complex disassembly                                |                   |
| GO:0043241                    | 2.32048493093861e-17                              | 58.1576802507837                                                    | 0.382672479413189 |
| 13                            | 158                                               | protein complex disassembly                                         |                   |
| GO:0000956                    | 5.66828256766503e-17                              | 54.0151515151515                                                    | 0.409314234309044 |
| 13                            | 169                                               | nuclear-transcribed mRNA catabolic process                          |                   |
| GO:0019058                    | 8.25737690205258e-17                              | 43.6221198156682                                                    | 0.559476852812954 |
| 14                            | 231                                               | viral infectious cycle                                              |                   |
| GO:0034623                    | 8.33715556476071e-17                              | 52.3193111236589                                                    | 0.421424122898069 |
| 13                            | 174                                               | cellular macromolecular complex disassembly                         |                   |
| GO:0006402                    | 1.12576743050793e-16                              | 51.0366391184573                                                    | 0.431112033769289 |
| 13                            | 178                                               | mRNA catabolic process                                              |                   |
| GO:0032984                    | 1.21219596404493e-16                              | 50.7256297918949                                                    | 0.433534011487094 |
| 13                            | 179                                               | macromolecular complex disassembly                                  |                   |
| GO:0022415                    | 4.34881362463966e-16                              | 38.4010840108401                                                    | 0.629714206629299 |
| 14                            | 260                                               | viral reproductive process                                          |                   |

Stable4\_20PerPair

|                                                                   |                      |                                                                   |                   |
|-------------------------------------------------------------------|----------------------|-------------------------------------------------------------------|-------------------|
| GO:0072594                                                        | 6.76709447762259e-16 | 44.0088053307949                                                  | 0.494083454432219 |
| 13                                                                | 204                  | establishment of protein localization to organelle                |                   |
| GO:0006401                                                        | 7.21494711640007e-16 | 43.7765151515151                                                  | 0.496505432150024 |
| 13                                                                | 205                  | RNA catabolic process                                             |                   |
| GO:0071845                                                        | 4.97717584360643e-14 | 30.8428379738343                                                  | 0.687841671856619 |
| 13                                                                | 284                  | cellular component disassembly at cellular level                  |                   |
| GO:0022411                                                        | 5.95874574839357e-14 | 30.3856198347107                                                  | 0.697529582727839 |
| 13                                                                | 288                  | cellular component disassembly                                    |                   |
| GO:0016032                                                        | 8.67784210839148e-13 | 21.3257055682685                                                  | 1.09231195073005  |
| 14                                                                | 451                  | viral reproduction                                                |                   |
| GO:0033365                                                        | 3.21483071021847e-11 | 17.9276679841897                                                  | 1.14559546052176  |
| 13                                                                | 473                  | protein localization to organelle                                 |                   |
| GO:0006605                                                        | 3.30068489648991e-11 | 17.887497535003                                                   | 1.14801743823957  |
| 474                                                               |                      | protein targeting                                                 | 13                |
| Tissue: Nerve_Tibial=>Thyroid Type: asymmetric                    |                      |                                                                   |                   |
| SourceGene: ATP6V0CP1(ENSG00000230201.4)                          |                      |                                                                   |                   |
| TargetGeneSet: IGSF21 AKR7A2 C1QA C1QC C1QB MACF1 CD53 FCER1G     |                      |                                                                   |                   |
| FCGR3A                                                            | CCL15                | TMEM177 TTC30B TRANK1 GOLGA4 SLC9A9 FAM53A AASDH ODAM             | RP11              |
| HERC5                                                             | CFI                  | MARCH1 CCDC111 TLR3 FAM105A PCDHGA1 CTB AIF1 HLA-DRB6             |                   |
| RP1                                                               | CCNC                 | FAM26F SNX10 TBXAS1 ZNF282 NUB1 CTD DOK2 MS4A6A                   |                   |
| MS4A7                                                             | PTPRCAP              | C3AR1 KIF21A SELPLG CLIP1 TDRD3 BATF SAMD15 GALC                  |                   |
| EFCAB11                                                           | MPI                  | TTC23 CORO1A MLYCD CAMTA2 DHX58 VPS25 MKS1 SMURF2                 |                   |
| C19orf35                                                          |                      | GNA15 EBI3 CD209 DOCK6 HCST SIGLEC16                              | CD33              |
| SIGLEC8                                                           | PCNA                 | HCK PXMP4 ASIP CSTF1 CASS4 PWP2 ITGB2 C22orf28                    |                   |
| ATF4                                                              | ARSA                 | GTPBP6 CYBB VSIG4 BTK MAGEA5                                      |                   |
| GOBPID                                                            | Pvalue               | OddsRatio                                                         | ExpCount          |
| GO:0002253                                                        | 1.08199749417542e-06 | 8.55642566624173                                                  | 1.38627084630821  |
| 10                                                                | 299                  | activation of immune response                                     |                   |
| GO:0002252                                                        | 1.4377197720213e-06  | 7.33804761904762                                                  | 1.78963393536779  |
| 11                                                                | 386                  | immune effector process                                           |                   |
| GO:0002460                                                        | 1.8017739586064e-06  | 11.1382384637994                                                  | 0.839180679537748 |
| 8                                                                 | 181                  | adaptive immune response based on somatic recombination of immune |                   |
| receptors built                                                   |                      | from immunoglobulin superfamily domains                           |                   |
| GO:0002250                                                        | 3.52042987973701e-06 | 10.1295272078501                                                  | 0.917998754411459 |
| 8                                                                 | 198                  | adaptive immune response                                          |                   |
| GO:0050778                                                        | 6.28010223781468e-06 | 6.95311725641788                                                  | 1.68763407376652  |
| 10                                                                | 364                  | positive regulation of immune response                            |                   |
| GO:0006956                                                        | 1.0510244848342e-05  | 19.9193548387097                                                  | 0.292090512767283 |
| 5                                                                 | 63                   | complement activation                                             |                   |
| GO:0019724                                                        | 1.42428302192121e-05 | 13.0018214936248                                                  | 0.528544737388416 |
| 6                                                                 | 114                  | B cell mediated immunity                                          |                   |
| GO:0050900                                                        | 1.48767819098159e-05 | 8.23510584127446                                                  | 1.11736212026849  |
| 8                                                                 | 241                  | leukocyte migration                                               |                   |
| Tissue: Thyroid=>Nerve_Tibial Type: asymmetric                    |                      |                                                                   |                   |
| SourceGene: CCT8L1P(ENSG0000020219.8)                             |                      |                                                                   |                   |
| TargetGeneSet: C1QC C1QB CD52 DHDDS RPS6KA1 ERMAP CPT2 IFI44 CD84 |                      |                                                                   |                   |
| ARHGAP30                                                          | PTPRC                | TMEM81 PTRHD1 DNAJC27 QPCT CCDC88A FBXO41 LOXL3 PROC              |                   |
| COL3A1                                                            | CLK1                 | CASP8 EBP STAB1 PDHB ACPP P2RY13 FAM131A DAPP1                    |                   |
| CCNA2                                                             | APC                  | CSF1R RP11 LY86 GPSM3 DEFA6 AKIRIN2 FAM54A COL1A2                 |                   |
| PIK3CG                                                            | IRF5                 | TAS2R5 DOK2 ADAM28 PPP2R2A LYN KIAA0196 FAM49B                    |                   |
| FAM83H                                                            | C9orf40              | SYK SUSD3 PTGS1 FAM78A PRKCQ CDC123 APBB1IP WDFY4                 |                   |
| HELLS                                                             | BLNK                 | NDUFS3 MRPL16 MS4A6A FEN1 FERMT3 SF1 SLCO2B1 IL10RA               |                   |
| SORL1                                                             | NDUFA9               | LPAR5 CD4 PTPN6 PLBD1 LRMP MED21 LARP4 BIN2                       |                   |
| NCKAP1L                                                           | HVCN1                | ERP29 DTX1 LCP1 ARL11 CKAP2 RNASE1 MAX BCL11B CTD                 |                   |
| PLCB2                                                             | VPS18                | PARP16 CORO1A ITGAM IRF8 ZNF469 CYBA SNORA67 NDEL1                |                   |
| AKAP10                                                            | ADAP2                | C17orf75 DDX52 MRFS23 DSC2 VAV1 EMR1 STXPB2                       |                   |
| MYO1F                                                             | GMIP                 | ZNF506 TYROBP ZNF567 RASGRP4 KCNN4 CD33 LAIR1 ZNF548              |                   |
| ERGIC3                                                            | ZNF295               | ITGB2 CECR6 PITPNB CYTH4 JOSD1 CBX7 RP1 KLHDC7B TLR7              |                   |
| PHEX                                                              | CYBB                 | GPR34 WAS BTK ARHGAP4                                             |                   |
| GOBPID                                                            | Pvalue               | OddsRatio                                                         | ExpCount          |
| GO:0046649                                                        | 7.58581529715495e-09 | 6.29006024096386                                                  | 3.41581897446543  |
| 18                                                                | 433                  | lymphocyte activation                                             |                   |
| GO:0042110                                                        | 3.01210299330702e-08 | 6.99411881977671                                                  | 2.51650404816276  |

STable4\_20PerPair

|            |     |                                                                    |                  |                   |                    |    |     |
|------------|-----|--------------------------------------------------------------------|------------------|-------------------|--------------------|----|-----|
| 15         | 319 | T cell activation                                                  |                  |                   |                    |    |     |
| GO:0002275 |     | 6.55562844714552e-08                                               | 23.9841840402588 |                   | 0.362881461490554  |    |     |
| 7          | 46  | myeloid cell activation involved in immune response                |                  |                   |                    |    |     |
| GO:0002253 |     | 9.50110401902084e-08                                               | 6.90273684210526 |                   | 2.3587294996886    | 14 |     |
| 299        |     | activation of immune response                                      |                  |                   |                    |    |     |
| GO:0070527 |     | 2.97791658404737e-07                                               | 46.9298820445609 |                   | 0.149885821050446  |    |     |
| 5          | 19  | platelet aggregation                                               |                  |                   |                    |    |     |
| GO:0002757 |     | 3.30392783566779e-07                                               | 7.44605644948562 |                   | 1.85385094457131   |    |     |
| 12         | 235 | immune response-activating signal transduction                     |                  |                   |                    |    |     |
| GO:0007596 |     | 3.5152353649221e-07                                                | 5.0485886362175  | 3.92858625700644  |                    |    | 17  |
| 498        |     | blood coagulation                                                  |                  |                   |                    |    |     |
| GO:0050900 |     | 4.32944640858016e-07                                               | 7.24788081171333 |                   | 1.90118330911356   |    |     |
| 12         | 241 | leukocyte migration                                                |                  |                   |                    |    |     |
| GO:0050851 |     | 5.3431215864553e-07                                                | 10.693984962406  | 0.970313473116047 |                    |    | 9   |
| 123        |     | antigen receptor-mediated signaling pathway                        |                  |                   |                    |    |     |
| GO:0002764 |     | 5.87667026407685e-07                                               | 7.02941176470588 |                   | 1.95640440107951   |    |     |
| 12         | 248 | immune response-regulating signaling pathway                       |                  |                   |                    |    |     |
| GO:0002521 |     | 7.33830439665032e-07                                               | 6.25660351502278 |                   | 2.38239568195973   |    |     |
| 13         | 302 | leukocyte differentiation                                          |                  |                   |                    |    |     |
| GO:0050778 |     | 1.03071600127173e-06                                               | 5.5948           | 2.8714967822296   | 14                 |    | 364 |
|            |     | positive regulation of immune response                             |                  |                   |                    |    |     |
| GO:0002429 |     | 1.0347493362279e-06                                                | 9.82465437788018 |                   | 1.04920074735312   |    |     |
| 9          | 133 | immune response-activating cell surface receptor signaling pathway |                  |                   |                    |    |     |
| GO:0002283 |     | 1.1616190191301e-06                                                | 74.4415584415584 |                   | 0.0867760016607847 |    |     |
| 4          | 11  | neutrophil activation involved in immune response                  |                  |                   |                    |    |     |
| GO:0045730 |     | 1.61200452732009e-06                                               | 31.2712975098296 |                   | 0.2051069130164    |    | 5   |
| 26         |     | respiratory burst                                                  |                  |                   |                    |    |     |
| GO:0002768 |     | 2.01128258708995e-06                                               | 9.01714285714286 |                   | 1.13597674901391   |    |     |
| 9          | 144 | immune response-regulating cell surface receptor signaling pathway |                  |                   |                    |    |     |
| GO:0050853 |     | 2.85580633788103e-06                                               | 27.3566513761468 |                   | 0.228773095287523  |    |     |
| 5          | 29  | B cell receptor signaling pathway                                  |                  |                   |                    |    |     |
| GO:0050867 |     | 3.01409784877097e-06                                               | 6.5793869504388  | 1.89329458168985  |                    |    | 11  |
| 240        |     | positive regulation of cell activation                             |                  |                   |                    |    |     |
| GO:0050865 |     | 3.02778961756455e-06                                               | 5.46327632763276 |                   | 2.70583350633174   |    |     |
| 13         | 343 | regulation of cell activation                                      |                  |                   |                    |    |     |
| GO:0030097 |     | 3.48796668194308e-06                                               | 4.6973079004329  | 3.65248079717667  |                    |    | 15  |
| 463        |     | hemopoiesis                                                        |                  |                   |                    |    |     |
| GO:0030155 |     | 4.46380198729616e-06                                               | 6.29963033675915 |                   | 1.97218185592693   |    |     |
| 11         | 250 | regulation of cell adhesion                                        |                  |                   |                    |    |     |
| GO:0002263 |     | 5.67745663290834e-06                                               | 9.33355209187859 |                   | 0.970313473116047  |    |     |
| 8          | 123 | cell activation involved in immune response                        |                  |                   |                    |    |     |
| GO:0002366 |     | 5.67745663290834e-06                                               | 9.33355209187859 |                   | 0.970313473116047  |    |     |
| 8          | 123 | leukocyte activation involved in immune response                   |                  |                   |                    |    |     |
| GO:0033628 |     | 7.51772815983642e-06                                               | 21.8761467889908 |                   | 0.27610545982977   |    |     |
| 5          | 35  | regulation of cell adhesion mediated by integrin                   |                  |                   |                    |    |     |
| GO:0051251 |     | 7.62662529661527e-06                                               | 6.62851782363977 |                   | 1.69607639609716   |    |     |
| 10         | 215 | positive regulation of lymphocyte activation                       |                  |                   |                    |    |     |
| GO:0048534 |     | 7.82275545149041e-06                                               | 4.37405303030303 |                   | 3.90492007473531   |    |     |
| 15         | 495 | hemopoietic or lymphoid organ development                          |                  |                   |                    |    |     |
| GO:0050870 |     | 8.24329624974661e-06                                               | 7.5              | 1.34897238945402  |                    | 9  | 171 |
|            |     | positive regulation of T cell activation                           |                  |                   |                    |    |     |
| GO:0002694 |     | 8.55643832069019e-06                                               | 5.34094802969732 |                   | 2.53228150301017   |    |     |
| 12         | 321 | regulation of leukocyte activation                                 |                  |                   |                    |    |     |
| GO:0050863 |     | 9.71160843328381e-06                                               | 6.4372949325556  | 1.7434087606394   | 10                 |    | 221 |
|            |     | regulation of T cell activation                                    |                  |                   |                    |    |     |
| GO:0002252 |     | 1.08749423599764e-05                                               | 4.81862341730152 |                   | 3.04504878555117   |    |     |
| 13         | 386 | immune effector process                                            |                  |                   |                    |    |     |
| GO:0034109 |     | 1.14067743349607e-05                                               | 19.883236030025  | 0.299771642100893 |                    |    | 5   |
| 38         |     | homotypic cell-cell adhesion                                       |                  |                   |                    |    |     |
| GO:0043299 |     | 1.14067743349607e-05                                               | 19.883236030025  | 0.299771642100893 |                    |    | 5   |
| 38         |     | leukocyte degranulation                                            |                  |                   |                    |    |     |
| GO:0042119 |     | 1.29942252501971e-05                                               | 34.72            | 0.149885821050446 |                    | 4  | 19  |
|            |     | neutrophil activation                                              |                  |                   |                    |    |     |



Stable4\_20PerPair

|                                                |                      |                                                                      |                    |
|------------------------------------------------|----------------------|----------------------------------------------------------------------|--------------------|
| GO:0051249                                     | 1.44271115055245e-05 | 5.52238006853227                                                     | 2.23250986090928   |
| 11                                             | 283                  | regulation of lymphocyte activation                                  |                    |
| GO:0002696                                     | 1.53947515461982e-05 | 6.0857192135219                                                      | 1.83807348972389   |
| 233                                            | positive             | regulation of leukocyte activation                                   | 10                 |
| GO:0007229                                     | 1.55215477456752e-05 | 12.7912186379928                                                     | 0.536433464812124  |
| 6                                              | 68                   | integrin-mediated signaling pathway                                  |                    |
| GO:0090330                                     | 1.63543084703709e-05 | 96.8445945945946                                                     | 0.0552210919659539 |
| 3                                              | 7                    | regulation of platelet aggregation                                   |                    |
| Tissue: Nerve_Tibial=>Thyroid Type: asymmetric |                      |                                                                      |                    |
| SourceGene: CTD-307407.7(ENSG00000254596.1)    |                      |                                                                      |                    |
| TargetGeneSet:                                 | CSDE1                | INTS3                                                                | TOMM20             |
| UGDH-AS1                                       | PAPSS1               | LARP7                                                                | NUDT6              |
| PLEKHA8                                        | CROT                 | TECPR1                                                               | LUC7L2             |
| EIF3M                                          | PDHX                 | FKBP2                                                                | C11orf85           |
| EIF4A1P7                                       |                      | ENTPD5                                                               | MOAP1              |
| RAB12                                          | TMEM241              | TLE6                                                                 | FKBP8              |
| GOBPID                                         | Pvalue               | OddsRatio                                                            | ExpCount           |
| GO:0006457                                     | 5.63442705220163e-10 | 20.8914386584289                                                     | 0.64272368694208   |
| 10                                             | 216                  | protein folding                                                      |                    |
| GO:0006487                                     | 7.45249247180947e-06 | 21.6591046581972                                                     | 0.27375268147533   |
| 5                                              | 92                   | protein N-linked glycosylation                                       |                    |
| Tissue: Thyroid=>Nerve_Tibial Type: asymmetric |                      |                                                                      |                    |
| SourceGene: CYP1B1(ENSG00000138061.7)          |                      |                                                                      |                    |
| TargetGeneSet:                                 | PHF13                | RPS6KA1                                                              | ZC3H12A            |
| UNC50                                          | BAZ2B                | EBP                                                                  | TRAM1L1            |
| HLA-DOA                                        | HLA-DPA1             |                                                                      | HLA-DPB1           |
| CLDN12                                         | IRF5                 | SYK                                                                  | NR4A3              |
| CDK17                                          | ARL11                | DOCK9                                                                | RPGRIP1            |
| FAM125A                                        | GMIP                 | ZNF85                                                                | PVR                |
| JOSD1                                          | GPR34                | PNMA6A                                                               | RENBP              |
| GOBPID                                         | Pvalue               | OddsRatio                                                            | ExpCount           |
| GO:0002504                                     | 8.99884222033228e-11 | 122.599431818182                                                     | 0.0761192997024427 |
| 6                                              | 22                   | antigen processing and presentation of peptide                       | or polysaccharide  |
| antigen via MHC class II                       |                      |                                                                      |                    |
| GO:0060333                                     | 9.20173883057114e-09 | 32.3976098191214                                                     | 0.273337485295135  |
| 7                                              | 79                   | interferon-gamma-mediated signaling pathway                          |                    |
| GO:0071346                                     | 3.12439656035624e-08 | 26.7837476610532                                                     | 0.325237007819528  |
| 7                                              | 94                   | cellular response to interferon-gamma                                |                    |
| GO:0034341                                     | 9.91663303037464e-08 | 22.3790250447227                                                     | 0.384056466680507  |
| 7                                              | 111                  | response to interferon-gamma                                         |                    |
| GO:0050867                                     | 1.1458642519952e-07  | 13.4653151726322                                                     | 0.830392360390284  |
| 9                                              | 240                  | positive regulation of cell activation                               |                    |
| GO:0050870                                     | 1.14730045992857e-07 | 16.638036809816                                                      | 0.591654556778078  |
| 171                                            | positive             | regulation of T cell activation                                      | 8                  |
| GO:0031294                                     | 2.11424996885467e-07 | 28.3241106719368                                                     | 0.259497612621964  |
| 6                                              | 75                   | lymphocyte costimulation                                             |                    |
| GO:0031295                                     | 2.11424996885467e-07 | 28.3241106719368                                                     | 0.259497612621964  |
| 6                                              | 75                   | T cell costimulation                                                 |                    |
| GO:0051251                                     | 6.61372722724634e-07 | 13.0609615827007                                                     | 0.743893156182963  |
| 8                                              | 215                  | positive regulation of lymphocyte activation                         |                    |
| GO:0019886                                     | 7.73840549732255e-07 | 306.340425531915                                                     | 0.0207598090097571 |
| 3                                              | 6                    | antigen processing and presentation of exogenous peptide antigen via |                    |
| MHC class II                                   |                      |                                                                      |                    |
| GO:0050863                                     | 8.1445014274641e-07  | 12.6876816454281                                                     | 0.76465296519272   |
| 8                                              | 221                  | regulation of T cell activation                                      |                    |
| GO:0002696                                     | 1.21311071480848e-06 | 12.0008465608466                                                     | 0.806172583212234  |
| 8                                              | 233                  | positive regulation of leukocyte activation                          |                    |
| GO:0002495                                     | 2.15619759798687e-06 | 183.778723404255                                                     | 0.0276797453463428 |
| 3                                              | 8                    | antigen processing and presentation of peptide antigen via MHC class |                    |
| II                                             |                      |                                                                      |                    |
| GO:0050865                                     | 2.28697402150652e-06 | 9.24514385862422                                                     | 1.18676908172445   |
| 9                                              | 343                  | regulation of cell activation                                        |                    |
| GO:0050778                                     | 3.72036959373266e-06 | 8.68526279628994                                                     | 1.2594284132586    |
| 9                                              |                      |                                                                      | 9                  |

STable4\_20PerPair

|                                                                  |                                                                     |                                                                    |                  |                   |  |  |  |  |  |                    |
|------------------------------------------------------------------|---------------------------------------------------------------------|--------------------------------------------------------------------|------------------|-------------------|--|--|--|--|--|--------------------|
| 364                                                              | positive regulation of immune response                              |                                                                    |                  |                   |  |  |  |  |  |                    |
| GO:0050851                                                       |                                                                     | 3.93543317118726e-06                                               | 16.6480186480186 |                   |  |  |  |  |  | 0.425576084700021  |
| 6                                                                | 123                                                                 | antigen receptor-mediated signaling pathway                        |                  |                   |  |  |  |  |  |                    |
| GO:0051249                                                       |                                                                     | 5.15417293342853e-06                                               | 9.78424242424243 |                   |  |  |  |  |  | 0.979170991626877  |
| 8                                                                | 283                                                                 | regulation of lymphocyte activation                                |                  |                   |  |  |  |  |  |                    |
| GO:0002429                                                       |                                                                     | 6.18604377546172e-06                                               | 15.3264137437366 |                   |  |  |  |  |  | 0.460175766382949  |
| 6                                                                | 133                                                                 | immune response-activating cell surface receptor signaling pathway |                  |                   |  |  |  |  |  |                    |
| GO:0002768                                                       |                                                                     | 9.76847894324836e-06                                               | 14.0938735177866 |                   |  |  |  |  |  | 0.498235416234171  |
| 6                                                                | 144                                                                 | immune response-regulating cell surface receptor signaling pathway |                  |                   |  |  |  |  |  |                    |
| GO:0042110                                                       |                                                                     | 1.23690374992472e-05                                               | 8.62961261675088 |                   |  |  |  |  |  | 1.10372984568542   |
| 8                                                                | 319                                                                 | T cell activation                                                  |                  |                   |  |  |  |  |  |                    |
| GO:0002694                                                       |                                                                     | 1.29427009876945e-05                                               | 8.57325422181652 |                   |  |  |  |  |  | 1.11064978202201   |
| 8                                                                | 321                                                                 | regulation of leukocyte activation                                 |                  |                   |  |  |  |  |  |                    |
| GO:0019882                                                       |                                                                     | 1.33066251569055e-05                                               | 13.3141344956413 |                   |  |  |  |  |  | 0.525915161580513  |
| 6                                                                | 152                                                                 | antigen processing and presentation                                |                  |                   |  |  |  |  |  |                    |
| GO:0046649                                                       |                                                                     | 1.50768866598216e-05                                               | 7.23613667740451 |                   |  |  |  |  |  | 1.4981662168708    |
| 433                                                              | lymphocyte activation                                               |                                                                    |                  |                   |  |  |  |  |  |                    |
| GO:0002757                                                       |                                                                     | 1.51476330399005e-05                                               | 10.1194410444716 |                   |  |  |  |  |  | 0.81309251954882   |
| 7                                                                | 235                                                                 | immune response-activating signal transduction                     |                  |                   |  |  |  |  |  |                    |
| Tissue: Nerve_Tibial=>Thyroid                                    | Type: asymmetric                                                    |                                                                    |                  |                   |  |  |  |  |  |                    |
| SourceGene:                                                      | ENSG00000206651.1                                                   |                                                                    |                  |                   |  |  |  |  |  |                    |
| TargetGeneSet:                                                   | CLSTN1 C1QA C1QC C1QB CMPK1 CD53 CTSS CD84                          |                                                                    |                  |                   |  |  |  |  |  |                    |
| FCGR2A FCGR2B                                                    | 7SK ARL4C BTD CCR5 RP11 CD200R1 CD86 UBA5                           |                                                                    |                  |                   |  |  |  |  |  |                    |
| P2RY13 TM4SF19-AS1                                               | CSF1R HAVCR2 DOCK2 HOXA10 ERV3-1 NCF1C TFEC                         |                                                                    |                  |                   |  |  |  |  |  |                    |
| TRBV30 PIGO TRIM14 SMC2 ALOX5 PSAP CTSD FOLR2 IL10RA CD3E M6PR   |                                                                     |                                                                    |                  |                   |  |  |  |  |  |                    |
| NCKAP1L LCP1 SUCLA2 RNASE6 NOMO2 SPN CORO1A SMCR8 VAV1 ACP5 CD37 |                                                                     |                                                                    |                  |                   |  |  |  |  |  |                    |
| LAIR1 CRLS1 PLTP MX1 ITGB2 RAC2 CYBB WAS                         |                                                                     |                                                                    |                  |                   |  |  |  |  |  |                    |
| GOBPID                                                           | Pvalue OddsRatio ExpCount Count Size Term                           |                                                                    |                  |                   |  |  |  |  |  |                    |
| GO:0042110                                                       |                                                                     | 1.05061286416583e-06                                               | 10.228064516129  | 1.08165524877171  |  |  |  |  |  | 9                  |
| 319                                                              | T cell activation                                                   |                                                                    |                  |                   |  |  |  |  |  |                    |
| GO:0045060                                                       |                                                                     | 5.93078768896842e-06                                               | 117.342391304348 |                   |  |  |  |  |  | 0.0372984568541969 |
| 3                                                                | 11                                                                  | negative thymic T cell selection                                   |                  |                   |  |  |  |  |  |                    |
| GO:0043383                                                       |                                                                     | 7.8888501007261e-06                                                | 104.297101449275 |                   |  |  |  |  |  | 0.0406892256591239 |
| 3                                                                | 12                                                                  | negative T cell selection                                          |                  |                   |  |  |  |  |  |                    |
| GO:0046649                                                       |                                                                     | 1.26953278577271e-05                                               | 7.41757075471698 |                   |  |  |  |  |  | 1.46820289253339   |
| 9                                                                | 433                                                                 | lymphocyte activation                                              |                  |                   |  |  |  |  |  |                    |
| Tissue: Thyroid=>Nerve_Tibial                                    | Type: asymmetric                                                    |                                                                    |                  |                   |  |  |  |  |  |                    |
| SourceGene:                                                      | HIST1H2BI(ENSG00000168242.3)                                        |                                                                    |                  |                   |  |  |  |  |  |                    |
| TargetGeneSet:                                                   | RPL11 IL22RA1 PUM1 RP11 RPS27 CAMSAP2 UBC MBNL1                     |                                                                    |                  |                   |  |  |  |  |  |                    |
| RANBP3L RPL37                                                    | CTB RPL10A HEY2 RPL30 ASTN2 LCN2 RPS24 ACTR1A                       |                                                                    |                  |                   |  |  |  |  |  |                    |
| KRTAP5-9                                                         | RPS25 COMMD6 U6 RPL7AP6 KDM6B RPL26 RPL17 ZNF14                     |                                                                    |                  |                   |  |  |  |  |  |                    |
| C19orf18                                                         | FOXRED2 SMC1A CHIC1                                                 |                                                                    |                  |                   |  |  |  |  |  |                    |
| GOBPID                                                           | Pvalue OddsRatio ExpCount Count Size Term                           |                                                                    |                  |                   |  |  |  |  |  |                    |
| GO:0006415                                                       |                                                                     | 1.78325549682361e-16                                               | 118.065843621399 |                   |  |  |  |  |  | 0.157428551657325  |
| 10                                                               | 91                                                                  | translational termination                                          |                  |                   |  |  |  |  |  |                    |
| GO:0006414                                                       |                                                                     | 7.89882819762901e-16                                               | 100.568421052632 |                   |  |  |  |  |  | 0.181648328835375  |
| 10                                                               | 105                                                                 | translational elongation                                           |                  |                   |  |  |  |  |  |                    |
| GO:0006614                                                       |                                                                     | 7.89882819762901e-16                                               | 100.568421052632 |                   |  |  |  |  |  | 0.181648328835375  |
| 10                                                               | 105                                                                 | SRP-dependent cotranslational protein targeting to membrane        |                  |                   |  |  |  |  |  |                    |
| GO:0006613                                                       |                                                                     | 8.7133434798242e-16                                                | 99.5138888888889 |                   |  |  |  |  |  | 0.183378312919521  |
| 10                                                               | 106                                                                 | cotranslational protein targeting to membrane                      |                  |                   |  |  |  |  |  |                    |
| GO:0045047                                                       |                                                                     | 8.7133434798242e-16                                                | 99.5138888888889 |                   |  |  |  |  |  | 0.183378312919521  |
| 10                                                               | 106                                                                 | protein targeting to ER                                            |                  |                   |  |  |  |  |  |                    |
| GO:0072599                                                       |                                                                     | 8.7133434798242e-16                                                | 99.5138888888889 |                   |  |  |  |  |  | 0.183378312919521  |
| 10                                                               | 106                                                                 | establishment of protein localization to endoplasmic reticulum     |                  |                   |  |  |  |  |  |                    |
| GO:0070972                                                       |                                                                     | 2.63560516523313e-15                                               | 88.3827160493827 |                   |  |  |  |  |  | 0.204138121929278  |
| 10                                                               | 118                                                                 | protein localization to endoplasmic reticulum                      |                  |                   |  |  |  |  |  |                    |
| GO:0000184                                                       |                                                                     | 2.87467034349544e-15                                               | 87.565749235474  | 0.205868106013425 |  |  |  |  |  | 10                 |
| 119                                                              | nuclear-transcribed mRNA catabolic process, nonsense-mediated decay |                                                                    |                  |                   |  |  |  |  |  |                    |
| GO:0019080                                                       |                                                                     | 3.28262315323143e-14                                               | 67.5413711583924 |                   |  |  |  |  |  | 0.26122759670611   |
| 10                                                               | 151                                                                 | viral genome expression                                            |                  |                   |  |  |  |  |  |                    |
| GO:0019083                                                       |                                                                     | 3.28262315323143e-14                                               | 67.5413711583924 |                   |  |  |  |  |  | 0.26122759670611   |
| 10                                                               | 151                                                                 | viral transcription                                                |                  |                   |  |  |  |  |  |                    |

Stable4\_20PerPair

|                                                                  |                      |                                                                |                   |
|------------------------------------------------------------------|----------------------|----------------------------------------------------------------|-------------------|
| GO:0006413                                                       | 3.51044963663819e-14 | 67.0610328638498                                               | 0.262957580790257 |
| 10                                                               | 152                  | translational initiation                                       |                   |
| GO:0006612                                                       | 3.75236081255074e-14 | 66.5874125874126                                               | 0.264687564874403 |
| 10                                                               | 153                  | protein targeting to membrane                                  |                   |
| GO:0043624                                                       | 3.75236081255074e-14 | 66.5874125874126                                               | 0.264687564874403 |
| 10                                                               | 153                  | cellular protein complex disassembly                           |                   |
| GO:0043241                                                       | 5.20125158025491e-14 | 64.3153153153153                                               | 0.273337485295135 |
| 10                                                               | 158                  | protein complex disassembly                                    |                   |
| GO:0000956                                                       | 1.02855993134244e-13 | 59.8197064989518                                               | 0.292367310220746 |
| 10                                                               | 169                  | nuclear-transcribed mRNA catabolic process                     |                   |
| GO:0034623                                                       | 1.38113512859077e-13 | 57.9756097560976                                               | 0.301017230641478 |
| 10                                                               | 174                  | cellular macromolecular complex disassembly                    |                   |
| GO:0006402                                                       | 1.73742476558946e-13 | 56.5793650793651                                               | 0.307937166978064 |
| 10                                                               | 178                  | mRNA catabolic process                                         |                   |
| GO:0032984                                                       | 1.83847693355907e-13 | 56.2406311637081                                               | 0.30966715106221  |
| 10                                                               | 179                  | macromolecular complex disassembly                             |                   |
| GO:0072594                                                       | 6.85030496520499e-13 | 48.9072164948454                                               | 0.352916753165871 |
| 10                                                               | 204                  | establishment of protein localization to organelle             |                   |
| GO:0006401                                                       | 7.19472842217583e-13 | 48.6529914529915                                               | 0.354646737250017 |
| 10                                                               | 205                  | RNA catabolic process                                          |                   |
| GO:0019058                                                       | 2.37606065091673e-12 | 42.8506787330317                                               | 0.399626323437824 |
| 10                                                               | 231                  | viral infectious cycle                                         |                   |
| GO:0022415                                                       | 7.71088005492001e-12 | 37.8026666666667                                               | 0.449795861878071 |
| 10                                                               | 260                  | viral reproductive process                                     |                   |
| GO:0071845                                                       | 1.849551847592e-11   | 34.4330900243309                                               | 0.491315479897585 |
| 10                                                               | 284                  | cellular component disassembly at cellular level               |                   |
| GO:0022411                                                       | 2.12382569663949e-11 | 33.9280575539568                                               | 0.498235416234171 |
| 10                                                               | 288                  | cellular component disassembly                                 |                   |
| GO:0016032                                                       | 1.70492184763235e-09 | 21.1413454270597                                               | 0.780222821950038 |
| 10                                                               | 451                  | viral reproduction                                             |                   |
| GO:0033365                                                       | 2.69983390067445e-09 | 20.1051115910727                                               | 0.818282471801259 |
| 10                                                               | 473                  | protein localization to organelle                              |                   |
| GO:0006605                                                       | 2.75534740067316e-09 | 20.0603448275862                                               | 0.820012455885406 |
| 10                                                               | 474                  | protein targeting                                              |                   |
| GO:0022613                                                       | 1.84274587978072e-06 | 20.4859408795962                                               | 0.389246418932946 |
| 6                                                                | 225                  | ribonucleoprotein complex biogenesis                           |                   |
| GO:0071843                                                       | 2.61556716958861e-06 | 19.2360515021459                                               | 0.413466196110996 |
| 6                                                                | 239                  | cellular component biogenesis at cellular level                |                   |
| Tissue: Nerve_Tibial=>Thyroid Type: asymmetric                   |                      |                                                                |                   |
| SourceGene: IQCK(ENSG00000174628.12)                             |                      |                                                                |                   |
| TargetGeneSet: KDM1A RPL11 PRPF38A SETDB1 WNT9A RPL31 RPL32 GRK7 |                      |                                                                |                   |
| RPL35A RPL34 EXOSC9 RPL37 RPS23 ZSCAN12 RPS18 RPS10 MEA1 RP11    |                      |                                                                |                   |
| PDCD2 AQP1 CTD RPL30 ANKRD20A3 NDST2 FAM175B SAAL1 WDR74         |                      |                                                                |                   |
| TRMT112 FAU RPS3 PA2G4 ZSCAN29 UBE2I POLR2C TRIM16 RPL17 RPL27   |                      |                                                                |                   |
| RPL38 RPL36 POLR2I ZNF606 FKBP1A-SDCBP2 RPS21 ERVH48-1 TSPEAR    |                      |                                                                |                   |
| C22orf23 GPKOW                                                   |                      |                                                                |                   |
| GOBPID                                                           | Pvalue               | OddsRatio                                                      | ExpCount          |
| GO:0006415                                                       | 1.06484340271148e-27 | 137.225225225225                                               | Count             |
| 17                                                               | 91                   | translational termination                                      | Size              |
| GO:0019080                                                       | 1.44397720200429e-27 | 93.4166666666667                                               | Term              |
| 19                                                               | 151                  | viral genome expression                                        |                   |
| GO:0019083                                                       | 1.44397720200429e-27 | 93.4166666666667                                               |                   |
| 19                                                               | 151                  | viral transcription                                            |                   |
| GO:0006414                                                       | 1.4857246303972e-26  | 115.28125                                                      | 0.297903259290015 |
| 105                                                              | 105                  | translational elongation                                       | 17                |
| GO:0006614                                                       | 1.4857246303972e-26  | 115.28125                                                      | 0.297903259290015 |
| 105                                                              | 105                  | SRP-dependent cotranslational protein targeting to membrane    | 17                |
| GO:0006613                                                       | 1.76672101846751e-26 | 113.977996254682                                               | 0.300740433188015 |
| 17                                                               | 106                  | cotranslational protein targeting to membrane                  |                   |
| GO:0045047                                                       | 1.76672101846751e-26 | 113.977996254682                                               | 0.300740433188015 |
| 17                                                               | 106                  | protein targeting to ER                                        |                   |
| GO:0072599                                                       | 1.76672101846751e-26 | 113.977996254682                                               | 0.300740433188015 |
| 17                                                               | 106                  | establishment of protein localization to endoplasmic reticulum |                   |

Stable4\_20PerPair

|                               |                          |                                                                     |                   |              |           |           |          |          |          |     |
|-------------------------------|--------------------------|---------------------------------------------------------------------|-------------------|--------------|-----------|-----------|----------|----------|----------|-----|
| GO:0070972                    | 1.24071833493747e-25     | 100.351897689769                                                    | 0.334786519964016 |              |           |           |          |          |          |     |
| 17                            | 118                      | protein localization to endoplasmic reticulum                       |                   |              |           |           |          |          |          |     |
| GO:0000184                    | 1.44521759105512e-25     | 99.3611111111111                                                    | 0.337623693862016 |              |           |           |          |          |          |     |
| 17                            | 119                      | nuclear-transcribed mRNA catabolic process, nonsense-mediated decay |                   |              |           |           |          |          |          |     |
| GO:0000956                    | 1.06403217343371e-24     | 73.9021019291679                                                    | 0.479482388762023 |              |           |           |          |          |          |     |
| 18                            | 169                      | nuclear-transcribed mRNA catabolic process                          |                   |              |           |           |          |          |          |     |
| GO:0006402                    | 2.80491330611982e-24     | 69.7010869565217                                                    | 0.505016953844025 |              |           |           |          |          |          |     |
| 18                            | 178                      | mRNA catabolic process                                              |                   |              |           |           |          |          |          |     |
| GO:0019058                    | 6.30270425777528e-24     | 57.8391938250429                                                    | 0.655387170438032 |              |           |           |          |          |          |     |
| 19                            | 231                      | viral infectious cycle                                              |                   |              |           |           |          |          |          |     |
| GO:0006413                    | 1.15304133202581e-23     | 74.8996913580247                                                    | 0.431250432496021 |              |           |           |          |          |          |     |
| 17                            | 152                      | translational initiation                                            |                   |              |           |           |          |          |          |     |
| GO:0006612                    | 1.29511764163764e-23     | 74.34375                                                            | 0.434087606394021 | 17           |           |           |          |          |          |     |
| 153                           |                          | protein targeting to membrane                                       |                   |              |           |           |          |          |          |     |
| GO:0043624                    | 1.29511764163764e-23     | 74.34375                                                            | 0.434087606394021 | 17           |           |           |          |          |          |     |
| 153                           |                          | cellular protein complex disassembly                                |                   |              |           |           |          |          |          |     |
| GO:0043241                    | 2.2879148116028e-23      | 71.682328605201                                                     | 0.448273475884022 | 17           |           |           |          |          |          |     |
| 158                           |                          | protein complex disassembly                                         |                   |              |           |           |          |          |          |     |
| GO:0006401                    | 3.85853626245071e-23     | 59.5242966751918                                                    | 0.581620649090028 |              |           |           |          |          |          |     |
| 18                            | 205                      | RNA catabolic process                                               |                   |              |           |           |          |          |          |     |
| GO:0022415                    | 6.23240340013473e-23     | 50.7753677857412                                                    | 0.737665213480036 |              |           |           |          |          |          |     |
| 19                            | 260                      | viral reproductive process                                          |                   |              |           |           |          |          |          |     |
| GO:0034623                    | 1.25149674302523e-22     | 64.3049363057325                                                    | 0.493668258252024 |              |           |           |          |          |          |     |
| 17                            | 174                      | cellular macromolecular complex disassembly                         |                   |              |           |           |          |          |          |     |
| GO:0032984                    | 2.05714880735212e-22     | 62.298353909465                                                     | 0.507854127742025 | 17           |           |           |          |          |          |     |
| 179                           |                          | macromolecular complex disassembly                                  |                   |              |           |           |          |          |          |     |
| GO:0072594                    | 2.01448505144395e-21     | 53.875                                                              | 0.578783475192028 | 17 204       |           |           |          |          |          |     |
|                               |                          | establishment of protein localization to organelle                  |                   |              |           |           |          |          |          |     |
| GO:0016032                    | 2.2914474365241e-21      | 34.1372093023256                                                    | 1.27956542799806  |              |           |           |          |          |          |     |
| 21                            | 451                      | viral reproduction                                                  |                   |              |           |           |          |          |          |     |
| GO:0071845                    | 5.98474503630991e-19     | 37.520443196005                                                     | 0.805757387032039 | 17           |           |           |          |          |          |     |
| 284                           |                          | cellular component disassembly at cellular level                    |                   |              |           |           |          |          |          |     |
| GO:0022411                    | 7.59513456674918e-19     | 36.9561808118081                                                    | 0.81710608262404  |              |           |           |          |          |          |     |
| 17                            | 288                      | cellular component disassembly                                      |                   |              |           |           |          |          |          |     |
| GO:0033365                    | 3.14167204277754e-15     | 21.6756213450292                                                    | 1.34198325375407  |              |           |           |          |          |          |     |
| 17                            | 473                      | protein localization to organelle                                   |                   |              |           |           |          |          |          |     |
| GO:0006605                    | 3.25327734533402e-15     | 21.6266411378556                                                    | 1.34482042765207  |              |           |           |          |          |          |     |
| 17                            | 474                      | protein targeting                                                   |                   |              |           |           |          |          |          |     |
| GO:0022613                    | 2.89559201436361e-06     | 13.4031300593632                                                    | 0.638364127050031 |              |           |           |          |          |          |     |
| 7                             | 225                      | ribonucleoprotein complex biogenesis                                |                   |              |           |           |          |          |          |     |
| GO:0042254                    | 3.62671779673266e-06     | 17.1032967032967                                                    | 0.422738910802021 |              |           |           |          |          |          |     |
| 6                             | 149                      | ribosome biogenesis                                                 |                   |              |           |           |          |          |          |     |
| GO:0071843                    | 4.31571459631471e-06     | 12.5818965517241                                                    | 0.678084561622033 |              |           |           |          |          |          |     |
| 7                             | 239                      | cellular component biogenesis at cellular level                     |                   |              |           |           |          |          |          |     |
| GO:0006364                    | 1.06890887301401e-05     | 20.0771604938272                                                    | 0.295066085392014 |              |           |           |          |          |          |     |
| 5                             | 104                      | rRNA processing                                                     |                   |              |           |           |          |          |          |     |
| GO:0016072                    | 1.40496412678571e-05     | 18.9219576719577                                                    | 0.312089128780015 |              |           |           |          |          |          |     |
| 5                             | 110                      | rRNA metabolic process                                              |                   |              |           |           |          |          |          |     |
| Tissue: Nerve_Tibial=>Thyroid | Type: asymmetric         |                                                                     |                   |              |           |           |          |          |          |     |
| SourceGene:                   | KLF15(ENSG00000163884.3) |                                                                     |                   |              |           |           |          |          |          |     |
| TargetGeneSet:                | TNFRSF25                 | HP1BP3                                                              | TXLNA             | GPBP1L1 TAL1 | RP1       | GDAP2     |          |          |          |     |
| UBQLN4                        | CCT3                     | PTPRVP                                                              | URB2              | SLC5A6       | CCT4      | PCBP1-AS1 | AUP1     | ART4     |          |     |
| MRPS5                         | RBM43                    | HSPD1                                                               | HMGB1P3           | CGGBP1       | PVRL3-AS1 | POGLUT1   | KIAA0226 |          |          |     |
| TNIP2                         | TMEM128                  | ARHGAP24                                                            |                   | TRIM2        | CCT5      | DNAJC21   | RP11     | C6orf228 |          |     |
| ZNF193                        | NUDT3                    | BRPF3                                                               | RPL7L1            | LRRC73       | STX1A     | PINX1     | POLR3D   | CHMP7    | TMEM68   |     |
| CYHR1                         | DNAJA1                   | C9orf80                                                             | C9orf114          |              | METTL11A  |           | FAM69B   | FBXO18   | HNRNPF   |     |
| P4HA1                         | TRIM68                   | UBQLNL                                                              | GVINP1            | SLC35C1      | C11orf84  |           | STIP1    | GPR137   | C11orf30 |     |
| EED                           | ATM                      | HSPA8                                                               | SLC6A12           | FKBP4        | RP4       | C12orf33  |          | REP15    | CCT2     |     |
| C12orf65                      |                          | RAN                                                                 | HSPH1             | PCID2        | TEP1      | SOCS6     | AHSA1    | ZC3H14   | HSP90AA1 |     |
| HERC2P2                       | ZFYVE19                  | PPP1R14D                                                            |                   | TP53BP1      | CSK       | C16orf57  |          | NIP7     | TMEM170A |     |
| MIR423                        | CTD                      | ZNF441                                                              | ZNF702P           | ZNF761       | ZNF71     | ZNF329    | SNHG11   | TOP1     | TOMM34   | CTA |
| RANGAP1                       | ZNF630                   |                                                                     |                   |              |           |           |          |          |          |     |
| GOBPID                        | Pvalue                   | OddsRatio                                                           | ExpCount          | Count        | Size      | Term      |          |          |          |     |

Stable4\_20PerPair

|                     |                                  |                                                                |                   |                                               |                           |
|---------------------|----------------------------------|----------------------------------------------------------------|-------------------|-----------------------------------------------|---------------------------|
| GO:0006457          | 5.40303927786045e-10             | 14.1335992023928                                               | 1.06124143657878  |                                               |                           |
| 12                  | 216                              | protein folding                                                |                   |                                               |                           |
| GO:0006458          | 1.71557085096681e-07             | 29.4051282051282                                               | 0.250570894747768 |                                               |                           |
| 6                   | 51                               | 'de novo' protein folding                                      |                   |                                               |                           |
| GO:0051084          | 2.90875758793648e-06             | 26.4948263118995                                               | 0.226005120752889 |                                               |                           |
| 5                   | 46                               | 'de novo' posttranslational protein folding                    |                   |                                               |                           |
| Tissue: Thyroid=>   | Nerve_Tibial                     | Type: asymmetric                                               |                   |                                               |                           |
| SourceGene:         | MAGI2(ENSG00000187391.12)        |                                                                |                   |                                               |                           |
| TargetGeneSet:      | C1orf159                         | ZBTB80S                                                        | PPCS              | ATP5F1 RP11 CFLAR CAMP                        |                           |
| PARP3               | UBA3                             | ATP6V1A                                                        | NDUFB5            | NDUFC1 GUSBP5 PDCD6 UBLCP1 RP1 MRPS18B        |                           |
| SENP6               | LSM5                             | MPLKIP                                                         | DUS4L             | POT1 LACTB2 U1 C9orf133 NDUFB6                |                           |
| SURF1               | C10orf125                        | MRPL23                                                         | IMMP1L            | CSTF3 CUL5 C11orf1 ATP5L CACNA2D4             |                           |
| IFFO1               | MAP3K12                          | ERH                                                            | NDUFB1            | COX5A COMMD4 RHOT2 NDUFB10 LCMT1 TXNDC17 SNF8 |                           |
| SKA2                | SPHK1                            | SNRPD1                                                         | UQCR11            | C19orf70                                      | LIG1 RN5S493 SLC2A11 RBM3 |
| GOBPID              | Pvalue                           | OddsRatio                                                      | ExpCount          | Count Size Term                               |                           |
| GO:0022904          | 8.04425735051335e-12             | 43.5730223123732                                               | 0.285654971974258 |                                               |                           |
| 9                   | 96                               | respiratory electron transport chain                           |                   |                                               |                           |
| GO:0045333          | 8.86289230077006e-12             | 32.77318640955                                                 | 0.422531312711923 | 10                                            |                           |
| 142                 |                                  | cellular respiration                                           |                   |                                               |                           |
| GO:0022900          | 1.66916152454155e-10             | 30.2463529411765                                               | 0.398726731714068 |                                               |                           |
| 9                   | 134                              | electron transport chain                                       |                   |                                               |                           |
| GO:0015980          | 1.66753391637132e-08             | 14.3975104581165                                               | 0.913500795792679 |                                               |                           |
| 10                  | 307                              | energy derivation by oxidation of organic compounds            |                   |                                               |                           |
| GO:0006119          | 1.74184387725757e-08             | 44.7692307692308                                               | 0.172583212234447 |                                               |                           |
| 6                   | 58                               | oxidative phosphorylation                                      |                   |                                               |                           |
| GO:0006120          | 6.45991136676516e-08             | 61.0229202037351                                               | 0.107120614490347 |                                               |                           |
| 5                   | 36                               | mitochondrial electron transport, NADH to ubiquinone           |                   |                                               |                           |
| GO:0042773          | 2.56578666390117e-07             | 45.0062656641604                                               | 0.139851913362397 |                                               |                           |
| 5                   | 47                               | ATP synthesis coupled electron transport                       |                   |                                               |                           |
| GO:0042775          | 2.56578666390117e-07             | 45.0062656641604                                               | 0.139851913362397 |                                               |                           |
| 5                   | 47                               | mitochondrial ATP synthesis coupled electron transport         |                   |                                               |                           |
| GO:0006091          | 3.7358954967509e-07              | 10.1420907641003                                               | 1.27354508338523  |                                               |                           |
| 10                  | 428                              | generation of precursor metabolites and energy                 |                   |                                               |                           |
| Tissue: Thyroid=>   | Nerve_Tibial                     | Type: asymmetric                                               |                   |                                               |                           |
| SourceGene:         | RP11-1007G5.2(ENSG00000254588.1) |                                                                |                   |                                               |                           |
| TargetGeneSet:      | IL22RA1                          | KPNA7                                                          | RP11              | ILF3 IMPDH2 ANKRD37 CTD RPL37                 |                           |
| RPL10A              | RPL39P3                          | EEF1A1                                                         | MRPS12            | FBXO43 RPS24 VWA5A RPS29 RPL7AP6 RPS3AP6      |                           |
| ALKBH5              | HILS1                            | RPS19                                                          | SNRPD2            | RPL28 C19orf18 C21orf7 EEF1B2P3               |                           |
| RPS4Y1              |                                  |                                                                |                   |                                               |                           |
| GOBPID              | Pvalue                           | OddsRatio                                                      | ExpCount          | Count Size Term                               |                           |
| GO:0006414          | 1.364216758407e-13               | 131.381443298969                                               | 0.123520863608055 |                                               |                           |
| 8                   | 105                              | translational elongation                                       |                   |                                               |                           |
| GO:0006415          | 5.73667225715822e-12             | 119.583333333333                                               | 0.107051415126981 |                                               |                           |
| 7                   | 91                               | translational termination                                      |                   |                                               |                           |
| GO:0006614          | 1.59949056608047e-11             | 102.4                                                          | 0.123520863608055 | 7 105                                         |                           |
| SRP-dependent       |                                  | cotranslational protein targeting to membrane                  |                   |                                               |                           |
| GO:0006613          | 1.71154309927941e-11             | 101.358585858586                                               | 0.124697252785274 |                                               |                           |
| 7                   | 106                              | cotranslational protein targeting to membrane                  |                   |                                               |                           |
| GO:0045047          | 1.71154309927941e-11             | 101.358585858586                                               | 0.124697252785274 |                                               |                           |
| 7                   | 106                              | protein targeting to ER                                        |                   |                                               |                           |
| GO:0072599          | 1.71154309927941e-11             | 101.358585858586                                               | 0.124697252785274 |                                               |                           |
| 7                   | 106                              | establishment of protein localization to endoplasmic reticulum |                   |                                               |                           |
| GO:0070972          | 3.67578705037832e-11             | 90.3252252252252                                               | 0.138813922911909 |                                               |                           |
| 7                   | 118                              | protein localization to endoplasmic reticulum                  |                   |                                               |                           |
| GO:0000184          | 3.90314413768745e-11             | 89.5125                                                        | 0.139990312089129 | 7 119                                         |                           |
| nuclear-transcribed |                                  | mRNA catabolic process, nonsense-mediated decay                |                   |                                               |                           |
| GO:0019080          | 2.10735439400921e-10             | 69.4652777777778                                               | 0.177634765760155 |                                               |                           |
| 7                   | 151                              | viral genome expression                                        |                   |                                               |                           |
| GO:0019083          | 2.10735439400921e-10             | 69.4652777777778                                               | 0.177634765760155 |                                               |                           |
| 7                   | 151                              | viral transcription                                            |                   |                                               |                           |
| GO:0006413          | 2.20774045242664e-10             | 68.9813793103448                                               | 0.178811154937375 |                                               |                           |
| 7                   | 152                              | translational initiation                                       |                   |                                               |                           |
| GO:0006612          | 2.31217887521436e-10             | 68.5041095890411                                               | 0.179987544114594 |                                               |                           |

Stable4\_20PerPair

|                                                                     |     |                                                                |                  |                   |  |  |  |                   |    |
|---------------------------------------------------------------------|-----|----------------------------------------------------------------|------------------|-------------------|--|--|--|-------------------|----|
| 7                                                                   | 153 | protein targeting to membrane                                  |                  |                   |  |  |  |                   |    |
| GO:0043624                                                          |     | 2.31217887521436e-10                                           | 68.5041095890411 |                   |  |  |  | 0.179987544114594 |    |
| 7                                                                   | 153 | cellular protein complex disassembly                           |                  |                   |  |  |  |                   |    |
| GO:0043241                                                          |     | 2.89998430384273e-10                                           | 66.212582781457  | 0.185869490000692 |  |  |  |                   | 7  |
| 158                                                                 |     | protein complex disassembly                                    |                  |                   |  |  |  |                   |    |
| GO:0000956                                                          |     | 4.65526458386655e-10                                           | 61.6691358024691 |                   |  |  |  | 0.198809770950107 |    |
| 7                                                                   | 169 | nuclear-transcribed mRNA catabolic process                     |                  |                   |  |  |  |                   |    |
| GO:0034623                                                          |     | 5.71276192231528e-10                                           | 59.8017964071856 |                   |  |  |  | 0.204691716836205 |    |
| 7                                                                   | 174 | cellular macromolecular complex disassembly                    |                  |                   |  |  |  |                   |    |
| GO:0006402                                                          |     | 6.70019047479182e-10                                           | 58.3865497076023 |                   |  |  |  | 0.209397273545083 |    |
| 7                                                                   | 178 | mRNA catabolic process                                         |                  |                   |  |  |  |                   |    |
| GO:0032984                                                          |     | 6.9686108506441e-10                                            | 58.043023255814  | 0.210573662722303 |  |  |  |                   | 7  |
| 179                                                                 |     | macromolecular complex disassembly                             |                  |                   |  |  |  |                   |    |
| GO:0072594                                                          |     | 1.73913476203622e-09                                           | 50.5883248730964 |                   |  |  |  | 0.239983392152792 |    |
| 7                                                                   | 204 | establishment of protein localization to organelle             |                  |                   |  |  |  |                   |    |
| GO:0006401                                                          |     | 1.79951730198254e-09                                           | 50.3292929292929 |                   |  |  |  | 0.241159781330012 |    |
| 7                                                                   | 205 | RNA catabolic process                                          |                  |                   |  |  |  |                   |    |
| GO:0019058                                                          |     | 4.13384965419902e-09                                           | 44.40625         | 0.271745899937721 |  |  |  |                   | 7  |
| 231                                                                 |     | viral infectious cycle                                         |                  |                   |  |  |  |                   |    |
| GO:0022415                                                          |     | 9.38945783179033e-09                                           | 39.2359683794466 |                   |  |  |  | 0.305861186077088 |    |
| 7                                                                   | 260 | viral reproductive process                                     |                  |                   |  |  |  |                   |    |
| GO:0071845                                                          |     | 1.72847995398527e-08                                           | 35.7758122743682 |                   |  |  |  | 0.334094526330358 |    |
| 7                                                                   | 284 | cellular component disassembly at cellular level               |                  |                   |  |  |  |                   |    |
| GO:0022411                                                          |     | 1.90356726981663e-08                                           | 35.2565836298932 |                   |  |  |  | 0.338800083039236 |    |
| 7                                                                   | 288 | cellular component disassembly                                 |                  |                   |  |  |  |                   |    |
| GO:0033365                                                          |     | 2.32883793308273e-08                                           | 26.7029868578256 |                   |  |  |  | 0.556432080824856 |    |
| 8                                                                   | 473 | protein localization to organelle                              |                  |                   |  |  |  |                   |    |
| GO:0006605                                                          |     | 2.3674714037337e-08                                            | 26.6437768240343 |                   |  |  |  | 0.557608470002076 |    |
| 8                                                                   | 474 | protein targeting                                              |                  |                   |  |  |  |                   |    |
| GO:0016032                                                          |     | 4.0825539604407e-07                                            | 22.0563063063063 |                   |  |  |  | 0.530551518926026 |    |
| 7                                                                   | 451 | viral reproduction                                             |                  |                   |  |  |  |                   |    |
| Tissue: Thyroid=>Nerve_Tibial Type: asymmetric                      |     |                                                                |                  |                   |  |  |  |                   |    |
| SourceGene: RP11-417O11.6(ENSG00000226458.1)                        |     |                                                                |                  |                   |  |  |  |                   |    |
| TargetGeneSet: NADK HP1BP3 RPL11 PPP1R8 XKR8 7SK PPCS UQCRH         |     |                                                                |                  |                   |  |  |  |                   |    |
| BEND5 RP11 GTF2B WARS2 S100A6 ACBD6 DHX9 SLC5A6 MRPL33 MORN2        |     |                                                                |                  |                   |  |  |  |                   |    |
| PPM1B PSME4 NONOP2 TMEM17 NFU1 DCTN1 CCDC115 U6 SETD5 UBE2E1        |     |                                                                |                  |                   |  |  |  |                   |    |
| CCDC72 RPL24 FNDC3B KCNMB3 RPL39L SENP5 LETM1 NAA11 MRPS18C NDUFC1  |     |                                                                |                  |                   |  |  |  |                   |    |
| HADHAP1 FRG1 RPL37 EEF1A1P19 CTD UQCRQ TMEM14C TMEM14B GABBR1 APOM  |     |                                                                |                  |                   |  |  |  |                   |    |
| C6orf48 COX6A1P2 C6orf226 RPL39P3 LINC00222 MRPS12 SUMO4            |     |                                                                |                  |                   |  |  |  |                   |    |
| PHF14 TOMM7 YAE1D1 MRPS24 GS1 MKLN1 C8orf40 C8orf59 RPL30 COX6C     |     |                                                                |                  |                   |  |  |  |                   |    |
| POLR2K C9orf46 MTAP GBA2 FAM27D1 SEC61B ATP5C1 CDNF RPS24 C10orf116 |     |                                                                |                  |                   |  |  |  |                   |    |
| AGAP11 IFIT2 IFIT3 ENTPD1 RPLP2 PRKCDBP RPL27A LMO2 ALKBH3 CELF1    |     |                                                                |                  |                   |  |  |  |                   |    |
| C11orf10 MTA2 FAU NADSYN1 ATP5L RPS25 C12orf57 KLRG1 FGD4           |     |                                                                |                  |                   |  |  |  |                   |    |
| PFDN5 ALKBH2 C12orf51 RPS2P5 DOCK9 EAPP CGRRF1 CGRRF1 LGALS3 ERH    |     |                                                                |                  |                   |  |  |  |                   |    |
| RPL7AP6 NEK9 NDUFB1 RPL3P4 HERC2P3 RSL24D1 RPLP1 NDUFB10 DNASE1L2   |     |                                                                |                  |                   |  |  |  |                   |    |
| ERVK13-1 SRRM2 TNFRSF17 USP31 NUDT21 C17orf67 STARD6                |     |                                                                |                  |                   |  |  |  |                   |    |
| RAB27B PIP5K1C RPL36 INSR PIN1 ZNF208 COX6B1 RPS19 ETHE1 SNRPD2     |     |                                                                |                  |                   |  |  |  |                   |    |
| ZNF845 PTPRA LINC00493 RP3 IFT52 PFDN4 ATP5J N6AMT1 KCNE1           |     |                                                                |                  |                   |  |  |  |                   |    |
| PLA2G6 EEF1B2P3 PHF8 NDUFA1                                         |     |                                                                |                  |                   |  |  |  |                   |    |
| GOBPID Pvalue OddsRatio ExpCount Count Size Term                    |     |                                                                |                  |                   |  |  |  |                   |    |
| GO:0006614                                                          |     | 2.85187993110751e-14                                           | 23.8361204013378 |                   |  |  |  | 0.770188914261989 |    |
| 14                                                                  | 105 | SRP-dependent cotranslational protein targeting to membrane    |                  |                   |  |  |  |                   |    |
| GO:0006613                                                          |     | 3.2662520390078e-14                                            | 23.5753780718336 |                   |  |  |  | 0.77752404677877  |    |
| 14                                                                  | 106 | cotranslational protein targeting to membrane                  |                  |                   |  |  |  |                   |    |
| GO:0045047                                                          |     | 3.2662520390078e-14                                            | 23.5753780718336 |                   |  |  |  | 0.77752404677877  |    |
| 14                                                                  | 106 | protein targeting to ER                                        |                  |                   |  |  |  |                   |    |
| GO:0072599                                                          |     | 3.2662520390078e-14                                            | 23.5753780718336 |                   |  |  |  | 0.77752404677877  |    |
| 14                                                                  | 106 | establishment of protein localization to endoplasmic reticulum |                  |                   |  |  |  |                   |    |
| GO:0006415                                                          |     | 9.97513105924338e-14                                           | 25.5681003584229 |                   |  |  |  | 0.667497059027057 |    |
| 13                                                                  | 91  | translational termination                                      |                  |                   |  |  |  |                   |    |
| GO:0070972                                                          |     | 1.50034564504427e-13                                           | 20.8375836120401 |                   |  |  |  | 0.86554563698014  |    |
| 14                                                                  | 118 | protein localization to endoplasmic reticulum                  |                  |                   |  |  |  |                   |    |
| GO:0006414                                                          |     | 6.67721192852802e-13                                           | 21.65603085554   | 0.770188914261989 |  |  |  |                   | 13 |

STable4\_20PerPair

|                                                |                                                     |                                                                     |                  |                   |             |          |         |         |          |
|------------------------------------------------|-----------------------------------------------------|---------------------------------------------------------------------|------------------|-------------------|-------------|----------|---------|---------|----------|
| 105                                            | translational elongation                            |                                                                     |                  |                   |             |          |         |         |          |
| GO:0000184                                     |                                                     | 3.43323659244544e-12                                                | 18.7773382024751 | 0.872880769496921 |             |          |         |         |          |
| 13                                             | 119                                                 | nuclear-transcribed mRNA catabolic process, nonsense-mediated decay |                  |                   |             |          |         |         |          |
| GO:0019080                                     |                                                     | 4.65830556068635e-12                                                | 15.781656616947  | 1.10760501003391  | 14          |          |         |         |          |
| 151                                            | viral genome expression                             |                                                                     |                  |                   |             |          |         |         |          |
| GO:0019083                                     |                                                     | 4.65830556068635e-12                                                | 15.781656616947  | 1.10760501003391  | 14          |          |         |         |          |
| 151                                            | viral transcription                                 |                                                                     |                  |                   |             |          |         |         |          |
| GO:0006612                                     |                                                     | 5.58034789813552e-12                                                | 15.552392868314  | 1.12227527506747  | 14          |          |         |         |          |
| 153                                            | protein targeting to membrane                       |                                                                     |                  |                   |             |          |         |         |          |
| GO:0072594                                     |                                                     | 2.20564378957146e-11                                                | 12.3460666317809 | 1.49636703342329  |             |          |         |         |          |
| 15                                             | 204                                                 | establishment of protein localization to organelle                  |                  |                   |             |          |         |         |          |
| GO:0006413                                     |                                                     | 7.89217215308798e-11                                                | 14.2862226347954 | 1.11494014255069  |             |          |         |         |          |
| 13                                             | 152                                                 | translational initiation                                            |                  |                   |             |          |         |         |          |
| GO:0043624                                     |                                                     | 8.57319919396345e-11                                                | 14.1831797235023 | 1.12227527506747  |             |          |         |         |          |
| 13                                             | 153                                                 | cellular protein complex disassembly                                |                  |                   |             |          |         |         |          |
| GO:0022904                                     |                                                     | 1.02303691109126e-10                                                | 19.425386996904  | 0.704172721610961 | 11          |          |         |         |          |
| 96                                             | respiratory electron transport chain                |                                                                     |                  |                   |             |          |         |         |          |
| GO:0043241                                     |                                                     | 1.28533505959621e-10                                                | 13.689284390063  | 1.15895093765137  | 13          |          |         |         |          |
| 158                                            | protein complex disassembly                         |                                                                     |                  |                   |             |          |         |         |          |
| GO:0006401                                     |                                                     | 2.87805973677657e-10                                                | 11.2768040063738 | 1.50370216594007  |             |          |         |         |          |
| 14                                             | 205                                                 | RNA catabolic process                                               |                  |                   |             |          |         |         |          |
| GO:0000956                                     |                                                     | 2.98479905878361e-10                                                | 12.7141577060932 | 1.23963739533596  |             |          |         |         |          |
| 13                                             | 169                                                 | nuclear-transcribed mRNA catabolic process                          |                  |                   |             |          |         |         |          |
| GO:0034623                                     |                                                     | 4.29033958791117e-10                                                | 12.3149669404929 | 1.27631305791987  |             |          |         |         |          |
| 13                                             | 174                                                 | cellular macromolecular complex disassembly                         |                  |                   |             |          |         |         |          |
| GO:0006402                                     |                                                     | 5.68761026823276e-10                                                | 12.0130335614207 | 1.30565358798699  |             |          |         |         |          |
| 13                                             | 178                                                 | mRNA catabolic process                                              |                  |                   |             |          |         |         |          |
| GO:0032984                                     |                                                     | 6.09615116983799e-10                                                | 11.9398238113745 | 1.31298872050377  |             |          |         |         |          |
| 13                                             | 179                                                 | macromolecular complex disassembly                                  |                  |                   |             |          |         |         |          |
| GO:0022415                                     |                                                     | 6.73842771840518e-10                                                | 9.48643193541153 | 1.90713445436302  |             |          |         |         |          |
| 15                                             | 260                                                 | viral reproductive process                                          |                  |                   |             |          |         |         |          |
| GO:0019058                                     |                                                     | 1.38006469738166e-09                                                | 9.90743338008415 | 1.69441561137638  |             |          |         |         |          |
| 14                                             | 231                                                 | viral infectious cycle                                              |                  |                   |             |          |         |         |          |
| GO:0022900                                     |                                                     | 3.78745454984021e-09                                                | 13.3882755669662 | 0.982907757248633 |             |          |         |         |          |
| 11                                             | 134                                                 | electron transport chain                                            |                  |                   |             |          |         |         |          |
| GO:0045333                                     |                                                     | 6.99654227157378e-09                                                | 12.5635998392929 | 1.04158881738288  |             |          |         |         |          |
| 11                                             | 142                                                 | cellular respiration                                                |                  |                   |             |          |         |         |          |
| GO:0016032                                     |                                                     | 2.83744530199301e-08                                                | 6.12248226583131 | 3.30814476506816  |             |          |         |         |          |
| 17                                             | 451                                                 | viral reproduction                                                  |                  |                   |             |          |         |         |          |
| GO:0071845                                     |                                                     | 1.54326233186212e-07                                                | 7.25953259532595 | 2.08317763476576  |             |          |         |         |          |
| 13                                             | 284                                                 | cellular component disassembly at cellular level                    |                  |                   |             |          |         |         |          |
| GO:0022411                                     |                                                     | 1.81385744427727e-07                                                | 7.15190615835777 | 2.11251816483288  |             |          |         |         |          |
| 13                                             | 288                                                 | cellular component disassembly                                      |                  |                   |             |          |         |         |          |
| GO:0033365                                     |                                                     | 1.78833529976849e-06                                                | 4.99796055472911 | 3.46951768043734  |             |          |         |         |          |
| 15                                             | 473                                                 | protein localization to organelle                                   |                  |                   |             |          |         |         |          |
| GO:0006605                                     |                                                     | 1.83567570389682e-06                                                | 4.98671263377146 | 3.47685281295412  |             |          |         |         |          |
| 15                                             | 474                                                 | protein targeting                                                   |                  |                   |             |          |         |         |          |
| GO:0015980                                     |                                                     | 2.52252795364082e-06                                                | 6.0800576992427  | 2.25188568265172  | 12          |          |         |         |          |
| 307                                            | energy derivation by oxidation of organic compounds |                                                                     |                  |                   |             |          |         |         |          |
| GO:0006119                                     |                                                     | 4.01204607330287e-06                                                | 16.4919230769231 | 0.425437685973289 |             |          |         |         |          |
| 6                                              | 58                                                  | oxidative phosphorylation                                           |                  |                   |             |          |         |         |          |
| Tissue: Thyroid=>Nerve_Tibial Type: asymmetric |                                                     |                                                                     |                  |                   |             |          |         |         |          |
| SourceGene: RP11-757C15.3(ENSG00000254593.1)   |                                                     |                                                                     |                  |                   |             |          |         |         |          |
| TargetGeneSet:                                 | CAPZB                                               | KHDRBS1                                                             | PSMB2            | SLFN1L            | RP1         | C1orf123 | CCDC76  |         |          |
| GDAP2                                          | RP4                                                 | S100A6                                                              | PFN1P1           | MORF4L1P1         | PTRHD1      | DDX50P1  | PAPOLG  | NFU1    |          |
| UBE2E3                                         | ING5                                                | TOP2B                                                               | IQCF1            | PSMD6             | ST3GAL6-AS1 | TTC14    | MAGEF1  | RAC1P2  |          |
| RAPGEF2                                        | RP11                                                | TRIM27                                                              | KCTD20           | COX6A1P2          | C6orf226    |          | YWHAZP4 | NDUFA4  |          |
| MALSU1                                         | NPC1L1                                              | PILRB                                                               | PSMC2            | POLR3D            | TOX         | C8orf59  | COX6C   | MTAP    | SKA2L    |
| ATP5C1                                         | IFIT3                                               | IFIT1                                                               | TAF5             | BNIP3             | C11orf10    | NADSYN1  | SNORA25 | SNORA32 |          |
| TAF1D                                          | ATP5L                                               | OAF                                                                 | DAZAP2           | IRAK3             | CKAP2       | RHOJ     | NEK9    | NDUFB1  | SRP14    |
| PLA2G4B                                        | SENP8                                               | NDUFB10                                                             | ZNF263           | SMYD4             | PSMB6       | ZFP161   | EPG5    | ATP5A1  | ZNF812   |
| COX6B1                                         | EID2                                                | ZNF28                                                               | ZSCAN22          | ROMO1             | MRPL39      | N6AMT1   | KCNE1   | CHAF1B  | HMGB1P10 |
| LGALS1                                         | TCEAL8                                              | NDUFA1                                                              |                  |                   |             |          |         |         |          |

Stable4\_20PerPair

| GOBPID                                         | Pvalue   | OddsRatio            | ExpCount         | Count            | Size      | Term                                                 |           |           |             |
|------------------------------------------------|----------|----------------------|------------------|------------------|-----------|------------------------------------------------------|-----------|-----------|-------------|
| GO:0022904                                     | 96       | 2.60977985895883e-10 | 27.9154196486662 |                  |           | 0.411874610753581                                    |           |           |             |
|                                                |          |                      |                  |                  |           | respiratory electron transport chain                 |           |           |             |
| GO:0022900                                     | 134      | 5.17620117142398e-09 | 19.3775094339623 |                  |           | 0.57490831084354                                     |           |           |             |
|                                                |          |                      |                  |                  |           | electron transport chain                             |           |           |             |
| GO:0045333                                     | 142      | 8.62946122562942e-09 | 18.2017307419492 |                  |           | 0.609231195073005                                    |           |           |             |
|                                                |          |                      |                  |                  |           | cellular respiration                                 |           |           |             |
| GO:0006119                                     | 58       | 4.74561742215685e-06 | 23.7272426348891 |                  |           | 0.248840910663622                                    |           |           |             |
|                                                |          |                      |                  |                  |           | oxidative phosphorylation                            |           |           |             |
| GO:0015980                                     | 307      | 5.91764803658849e-06 | 8.02956819045207 |                  |           | 1.31714068230572                                     |           |           |             |
|                                                |          |                      |                  |                  |           | energy derivation by oxidation of organic compounds  |           |           |             |
| GO:0006120                                     | 36       | 1.6323489044894e-05  | 30.9418103448276 |                  |           | 0.154452979032593                                    |           |           |             |
|                                                |          |                      |                  |                  |           | mitochondrial electron transport, NADH to ubiquinone |           |           |             |
| GO:0006200                                     | 75       | 1.69040885833644e-05 | 17.9436090225564 |                  |           | 0.321777039651235                                    |           |           |             |
|                                                |          |                      |                  |                  |           | ATP catabolic process                                |           |           |             |
| Tissue: Thyroid=>Nerve_Tibial Type: asymmetric |          |                      |                  |                  |           |                                                      |           |           |             |
| SourceGene: SEPSECS(ENSG00000109618.7)         |          |                      |                  |                  |           |                                                      |           |           |             |
| TargetGeneSet:                                 |          |                      |                  |                  |           |                                                      |           |           |             |
| CTNNBIP1                                       | HP1BP3   | ZDHHHC18             | PSMB2            | EIF2C3           | INPP5B    | RP3 RP4                                              |           |           |             |
| UQCRH                                          | MOB3C    | CPT2                 | LRRC40           | PIGK             | IFI44     | ATP5F1                                               | GDAP2     | MRPS21    | S100A6      |
| S100A4                                         | INTS3    | CRABP2               | B4GALT3          | PIGC             | RP11      | ACBD6                                                | DENND1B   | TIMM17A   | PTPN14      |
| KIAA1383                                       |          | LYST-IT1             |                  | FH               | CPSF3     | DDX1                                                 | TTC32     | PUM2      | FOSL2       |
| DDX50P1                                        | ATL2     | ASS1P2               | ETAA1            | NFU1             | CAPG      | CNNM3                                                | AMMECR1L  |           | UBE2E3      |
| KCTD18                                         | CFLAR    | IMPDH1P10            |                  | CASP8            | LANCL1    | SLC23A3                                              | AGAP1-IT1 |           | SETD5       |
| ZNF385D                                        | EBP      | CSRNP1               | QARS             | RHOA             | RBM5      | SPCS1                                                | PDHB      | PSMD6     | ADAMTS9-AS2 |
| UBA3                                           | ARL6IP5  | ATG3                 | ATP6V1A          | ZBTB20           | KALRN     | ARID4A                                               | KPNA4     | FAM131A   | MAGEF1      |
| SENP5                                          | RELL1    | ANKRD17              | DNAJB14          | PPA2             | ANXA5     | NUDT6                                                | INTU      | OTUD4     | NDUFS6 CTD  |
| TXNDC15                                        | SOX9     | NDFIP1               | PRRC2A           | APOM             | HNRNPC    | DEFA6                                                | FANCE     |           | C6orf226    |
| GTPBP2                                         | MAD2L1BP |                      | VEGFA            | GCM1             | HACE1     | LINC00222                                            |           |           | ZNF259P1    |
| FAM54A                                         | NUDT1    | YAE1D1               | URGCP            | HUS1             | GS1       | ZKSCAN1                                              | GPC2      | PSMC2     | ST7-AS1     |
| NDUFA5                                         | OPN1SW   | GSTK1                | CASP2            | POLR3D           | TNFRSF10A |                                                      | LOXL2     | RNF122    | KAT6A       |
| C8orf40                                        | HOOK3    | LACTB2               | RPS20P21         |                  | C8orf59   | DECR1                                                | COX6C     | NDUFB9    | KIAA0196    |
| RP13                                           | HSF1     | CD274                | LINC00032        |                  | HRCT1     | C9orf40                                              | LINC00475 |           | STXBP1      |
| ZDHHHC12                                       | C9orf169 |                      | ATP5C1           | CDC123           | C10orf102 |                                                      | MARVELD1  |           | PPRC1       |
| DMBT1                                          | NUP98    | SMPD1                | COMMD9           | ALKBH3           | NDUFS3    | MRPL16                                               | FEN1      | C11orf84  | RCE1        |
| SNORA32                                        | SNORA8   | SNORA18              | ATP5L            | TBCEL            | HIN1L     | NDUFA9                                               | PTPN6     | SCAF11    | H1FNT       |
| FMNL3                                          | ITGA5    | ATXN2                | RFC5             | MPHOSPH8         |           | SACS                                                 | RFC3      | TUBGCP3   | PARP2       |
| LGALS3                                         | CHMP4BP1 |                      | MAX              | NEK9             | ANGEL1    | NDUFB1                                               | TMEM85    | TMEM62    | NARG2       |
| LOXL1                                          | COX5A    | IMP3                 | SCAPER           | LPCAT2           | NPRL3     | NDUFB10                                              | HCFC1R1   | CTA       | DCUN1D3     |
| USP31                                          | C16orf54 |                      | PYCARD           | LPCAT2           | NAE1      | RANBP10                                              | ZNF821    |           | C16orf46    |
| MIR4720                                        | ZNF469   | CYBA                 | NDEL1            | C17orf75         |           | SMARCE1                                              | HEXIM1    | HILS1     | RNF43       |
| DNAH17                                         | USP36    | C17orf90             |                  | MYADML2          | MYL12B    | ZFP161                                               | ATP5A1    | DYM       | ELAC1       |
| TICAM1                                         | C19orf70 |                      | HSD11B1L         |                  | MAN2B1    | NDUFB7                                               | ZNF506    | UQCRFS1   | COX6B1      |
| WDR62                                          | EID2     | KCNN4                | ZNF404           | PVR              | CACNG8    | ZIK1                                                 | ZSCAN22   | ZNF446    | PCNA        |
| RALGAPA2                                       |          | CBFA2T2              | MYH7B            | ERGC3            | ROMO1     | SNHG11                                               | IFT52     | GDAP1L1   | KRT18P4     |
| SLC04A1                                        | RPL10P1  | MORC3                | MRPL40           | CRYBB1           | MAFF      | JOSD1                                                | PRDX3P1   | SERHL     | CA5BP1      |
| ATP6AP2                                        | ZNF630   | PHF8                 | RP6              | CXorf65          | CSTF2     | TCEAL8                                               | MID2      | C1GALT1C1 | SSR4        |
| ARHGAP4                                        | VAMP7    |                      |                  |                  |           |                                                      |           |           |             |
| GOBPID                                         | Pvalue   | OddsRatio            | ExpCount         | Count            | Size      | Term                                                 |           |           |             |
| GO:0045333                                     | 142      | 5.95369350768205e-15 | 12.9407454895137 |                  |           | 1.95543560999239                                     |           |           |             |
|                                                |          |                      |                  |                  |           | cellular respiration                                 |           |           |             |
| GO:0022904                                     | 96       | 1.39047326264504e-14 | 16.7576158019196 |                  |           | 1.32198463774133                                     |           |           |             |
|                                                |          |                      |                  |                  |           | respiratory electron transport chain                 |           |           |             |
| GO:0022900                                     | 134      | 3.3191026465857e-13  | 12.118879786626  | 1.84527022351394 | 18        |                                                      |           |           |             |
|                                                |          |                      |                  |                  |           | electron transport chain                             |           |           |             |
| GO:0015980                                     | 307      | 2.52703603108403e-10 | 6.09126771731589 |                  |           | 4.2275967061103 22                                   |           |           |             |
|                                                |          |                      |                  |                  |           | energy derivation by oxidation of organic compounds  |           |           |             |
| GO:0006091                                     | 428      | 5.22707937323311e-09 | 4.70087694483734 |                  |           | 5.89384817659678                                     |           |           |             |
|                                                |          |                      |                  |                  |           | generation of precursor metabolites and energy       |           |           |             |
| GO:0006119                                     | 58       | 5.74537505179864e-09 | 15.6569664902998 |                  |           | 0.798699051968722                                    |           |           |             |
|                                                |          |                      |                  |                  |           | oxidative phosphorylation                            |           |           |             |
| GO:0042773                                     | 47       | 1.28826821569728e-08 | 17.7182825484765 |                  |           | 0.647221645560861                                    |           |           |             |
|                                                |          |                      |                  |                  |           | ATP synthesis coupled electron transport             |           |           |             |
| GO:0042775                                     |          | 1.28826821569728e-08 | 17.7182825484765 |                  |           | 0.647221645560861                                    |           |           |             |



Stable4\_20PerPair

|                                                |         |                                                                                                |                  |                   |         |                |            |          |          |
|------------------------------------------------|---------|------------------------------------------------------------------------------------------------|------------------|-------------------|---------|----------------|------------|----------|----------|
| 9                                              | 47      | mitochondrial ATP synthesis coupled electron transport                                         |                  |                   |         |                |            |          |          |
| GO:0006120                                     |         | 2.44259415397913e-08                                                                           | 21.2774869109948 |                   |         | 0.495744239153 |            | 8        |          |
| 36                                             |         | mitochondrial electron transport, NADH to ubiquinone                                           |                  |                   |         |                |            |          |          |
| Tissue: Nerve_Tibial=>Thyroid Type: asymmetric |         |                                                                                                |                  |                   |         |                |            |          |          |
| SourceGene: TRMT2A(ENSG00000099899.9)          |         |                                                                                                |                  |                   |         |                |            |          |          |
| TargetGeneSet:                                 | PARK7   | MYOM3                                                                                          | ZNF642           | TDPX2             | AKR1A1  | MKNK1          | PSRC1      | VPS45    |          |
| TARS2                                          | PSMD4   | CHTOP                                                                                          | RUSC1-AS1        | CCT3              | CCL15   | DARS2          | NEK7       | ATF3     |          |
| Clorf131                                       |         | FH                                                                                             | C2orf43          | SLC4A1AP          |         | PCBP1-AS1      | CCDC142    | C2orf68  |          |
| TMEM177                                        | PSMD14  | PMS1                                                                                           | WDR12            | ATIC              | BCS1L   | TTL4           | SLC16A14   | PSMD1    |          |
| DTYMK                                          | MLH1    | RUVBL1                                                                                         | ASTE1            | CEP63             | EIF2B5  | ALG3           | SLC10A7    | MARCH1   | BRIP1    |
| NDUFS6                                         | SKP2    | GTF2H2C                                                                                        | PTCD2            | HARS2             | RP11    | SLC36A1        | TTC1       | RPL26L1  | PRR7     |
| ACOT13                                         | ZKSCAN3 | ZNRD1-AS1                                                                                      |                  | VPS52             | MNF1    | ABCC10         | AARS2      | MCM3     | RP13     |
| RTN4IP1                                        | ANKRD61 | COPS6                                                                                          | SLC12A9          | CTA               | KLHDC10 | CDK5           | COPS5      | NUDT2    | EXOSC3   |
| FAM108B1                                       |         | FKBP15                                                                                         | PSMB7            | TRUB2             | SLC2A6  | ASAH2B         | DNAJC12    | SIRT1    | SLC25A16 |
| MRPS16                                         | EXOSC1  | ENTPD7                                                                                         | COX15            | PDE3B             | TRMT112 | HMBS           | APPL2      | NDUFA9   | COPS7A   |
| PRKAG1                                         | ATF7    | STAT2                                                                                          | NUP37            | ANAPC5            | BRD7P5  | PSMB5          | PSMA3      | ANGEL1   | ZNF280D  |
| KIAA1024                                       |         | DET1                                                                                           | TCEB2            | ZNF174            | ARL6IP1 | CDC37P1        | EXOC3L1    | TUBB3    | WRAP53   |
| USP32P3                                        | TMEM199 | ALDOC                                                                                          | TEFM             | PSMB3             | ATP5G1  | SNF8           | INTS2      | C17orf80 | FDXR     |
| ANAPC11                                        | SMCHD1  | ZNF397                                                                                         | HAUS1            | PALM              | YIF1B   | EID2B          | ZNF780A    | EXOSC5   | ZNF225   |
| ZNF135                                         | TRIB3   | C20orf203                                                                                      |                  | ZNF341            | RBL1    | APP            | MIS18A-AS1 | ZNF70    |          |
| ZMAT5                                          | ATF4    | ZNF81                                                                                          | NAA10            |                   |         |                |            |          |          |
| GOBPID                                         | Pvalue  | OddsRatio                                                                                      | ExpCount         | Count             | Size    | Term           |            |          |          |
| GO:0051443                                     |         | 6.97727338314707e-10                                                                           | 19.42674291939   | 0.635526953152031 |         |                |            | 10       |          |
| 82                                             |         | positive regulation of ubiquitin-protein ligase activity                                       |                  |                   |         |                |            |          |          |
| GO:0031145                                     |         | 7.88209797771786e-10                                                                           | 19.1592801504163 | 0.643277281849007 |         |                |            |          |          |
| 10                                             | 83      | anaphase-promoting complex-dependent proteasomal ubiquitin-dependent protein catabolic process |                  |                   |         |                |            |          |          |
| GO:0051351                                     |         | 1.12547124189759e-09                                                                           | 18.3991228070175 | 0.666528267939935 |         |                |            |          |          |
| 10                                             | 86      | positive regulation of ligase activity                                                         |                  |                   |         |                |            |          |          |
| GO:0051436                                     |         | 2.140548360725e-09                                                                             | 21.5147304988283 | 0.519272022697391 |         |                |            |          |          |
| 9                                              | 67      | negative regulation of ubiquitin-protein ligase activity involved in mitotic cell cycle        |                  |                   |         |                |            |          |          |
| GO:0031397                                     |         | 2.2049634277003e-09                                                                            | 17.0456719273075 | 0.713030240121791 |         |                |            |          |          |
| 10                                             | 92      | negative regulation of protein ubiquitination                                                  |                  |                   |         |                |            |          |          |
| GO:0051438                                     |         | 3.36151528468684e-09                                                                           | 16.2482900136799 | 0.744031554909695 |         |                |            |          |          |
| 10                                             | 96      | regulation of ubiquitin-protein ligase activity                                                |                  |                   |         |                |            |          |          |
| GO:0051352                                     |         | 4.12598286118423e-09                                                                           | 19.8002773925104 | 0.558023666182271 |         |                |            |          |          |
| 9                                              | 72      | negative regulation of ligase activity                                                         |                  |                   |         |                |            |          |          |
| GO:0051437                                     |         | 4.12598286118423e-09                                                                           | 19.8002773925104 | 0.558023666182271 |         |                |            |          |          |
| 9                                              | 72      | positive regulation of ubiquitin-protein ligase activity involved in mitotic cell cycle        |                  |                   |         |                |            |          |          |
| GO:0051444                                     |         | 4.12598286118423e-09                                                                           | 19.8002773925104 | 0.558023666182271 |         |                |            |          |          |
| 9                                              | 72      | negative regulation of ubiquitin-protein ligase activity                                       |                  |                   |         |                |            |          |          |
| GO:0051340                                     |         | 5.02731708972011e-09                                                                           | 15.5217864923747 | 0.775032869697599 |         |                |            |          |          |
| 10                                             | 100     | regulation of ligase activity                                                                  |                  |                   |         |                |            |          |          |
| GO:0051439                                     |         | 8.5054595135404e-09                                                                            | 18.0709159983115 | 0.604525638364127 |         |                |            |          |          |
| 9                                              | 78      | regulation of ubiquitin-protein ligase activity involved in mitotic cell cycle                 |                  |                   |         |                |            |          |          |
| GO:0000209                                     |         | 4.64095777366706e-08                                                                           | 10.3022442244224 | 1.24780292021313  |         |                |            |          |          |
| 11                                             | 161     | protein polyubiquitination                                                                     |                  |                   |         |                |            |          |          |
| GO:0031398                                     |         | 5.10327031114352e-08                                                                           | 11.917211328976  | 0.98429174451595  |         |                |            | 10       |          |
| 127                                            |         | positive regulation of protein ubiquitination                                                  |                  |                   |         |                |            |          |          |
| GO:0031396                                     |         | 7.19090893205085e-08                                                                           | 9.83805259506842 | 1.30205522109197  |         |                |            |          |          |
| 11                                             | 168     | regulation of protein ubiquitination                                                           |                  |                   |         |                |            |          |          |
| GO:0043161                                     |         | 7.59228779160501e-08                                                                           | 8.61441624365482 | 1.61981869766798  |         |                |            |          |          |
| 12                                             | 209     | proteasomal ubiquitin-dependent protein catabolic process                                      |                  |                   |         |                |            |          |          |
| GO:0010498                                     |         | 1.08915664639264e-07                                                                           | 8.31470588235294 | 1.67407099854681  |         |                |            |          |          |
| 12                                             | 216     | proteasomal protein catabolic process                                                          |                  |                   |         |                |            |          |          |
| GO:0042770                                     |         | 1.2873709888606e-07                                                                            | 10.7156862745098 | 1.08504601757664  |         |                |            |          |          |
| 10                                             | 140     | signal transduction in response to DNA damage                                                  |                  |                   |         |                |            |          |          |
| GO:0000216                                     |         | 1.67078785870657e-07                                                                           | 15.4582881906826 | 0.612275967061103 |         |                |            |          |          |
| 8                                              | 79      | M/G1 transition of mitotic cell cycle                                                          |                  |                   |         |                |            |          |          |
| GO:0006521                                     |         | 2.67078153697813e-07                                                                           | 19.052           | 0.441768735727631 |         |                | 7          | 57       |          |

Stable4\_20PerPair

|            |                                                                                                    |                  |                    |    |     |  |
|------------|----------------------------------------------------------------------------------------------------|------------------|--------------------|----|-----|--|
|            | regulation of cellular amino acid metabolic process                                                |                  |                    |    |     |  |
| GO:0010565 | 3.14558599833867e-07                                                                               | 9.66435185185185 | 1.1935506193343    | 10 |     |  |
| 154        | regulation of cellular ketone metabolic process                                                    |                  |                    |    |     |  |
| GO:0007346 | 6.2001778638116e-07                                                                                | 6.36144200626959 | 2.34834959518372   |    |     |  |
| 13         | 303 regulation of mitotic cell cycle                                                               |                  |                    |    |     |  |
| GO:0006977 | 7.42913194607956e-07                                                                               | 16.135593220339  | 0.511521694000415  | 7  |     |  |
| 66         | DNA damage response, signal transduction by p53 class mediator resulting in cell cycle arrest      |                  |                    |    |     |  |
| GO:0072413 | 7.42913194607956e-07                                                                               | 16.135593220339  | 0.511521694000415  | 7  |     |  |
| 66         | signal transduction involved in mitotic cell cycle checkpoint                                      |                  |                    |    |     |  |
| GO:0072431 | 7.42913194607956e-07                                                                               | 16.135593220339  | 0.511521694000415  | 7  |     |  |
| 66         | signal transduction involved in mitotic cell cycle G1/S transition DNA damage checkpoint           |                  |                    |    |     |  |
| GO:0072474 | 7.42913194607956e-07                                                                               | 16.135593220339  | 0.511521694000415  | 7  |     |  |
| 66         | signal transduction involved in mitotic cell cycle G1/S checkpoint                                 |                  |                    |    |     |  |
| GO:0072401 | 8.24323360175333e-07                                                                               | 15.8655555555556 | 0.519272022697391  |    |     |  |
| 7          | 67 signal transduction involved in DNA integrity checkpoint                                        |                  |                    |    |     |  |
| GO:0072404 | 8.24323360175333e-07                                                                               | 15.8655555555556 | 0.519272022697391  |    |     |  |
| 7          | 67 signal transduction involved in G1/S transition checkpoint                                      |                  |                    |    |     |  |
| GO:0072422 | 8.24323360175333e-07                                                                               | 15.8655555555556 | 0.519272022697391  |    |     |  |
| 7          | 67 signal transduction involved in DNA damage checkpoint                                           |                  |                    |    |     |  |
| GO:0072395 | 9.13088353527624e-07                                                                               | 15.6043715846995 | 0.527022351394367  |    |     |  |
| 7          | 68 signal transduction involved in cell cycle checkpoint                                           |                  |                    |    |     |  |
| GO:0071156 | 9.40758134296031e-07                                                                               | 6.70809523809524 | 2.04608677600166   |    |     |  |
| 12         | 264 regulation of cell cycle arrest                                                                |                  |                    |    |     |  |
| GO:0000084 | 9.48851097160211e-07                                                                               | 9.936            | 1.03854404539478   | 9  | 134 |  |
| S          | phase of mitotic cell cycle                                                                        |                  |                    |    |     |  |
| GO:0007093 | 1.29061935829855e-06                                                                               | 9.5504854368932  | 1.07729568887966   | 9  |     |  |
| 139        | mitotic cell cycle checkpoint                                                                      |                  |                    |    |     |  |
| GO:0033238 | 1.35260516890109e-06                                                                               | 14.64            | 0.558023666182271  | 7  | 72  |  |
|            | regulation of cellular amine metabolic process                                                     |                  |                    |    |     |  |
| GO:0031571 | 1.48657480361926e-06                                                                               | 14.4171717171717 | 0.565773994879247  |    |     |  |
| 7          | 73 mitotic cell cycle G1/S transition DNA damage checkpoint                                        |                  |                    |    |     |  |
| GO:0051320 | 1.63603628759187e-06                                                                               | 9.26278800173888 | 1.10829700366757   |    |     |  |
| 9          | 143 S phase                                                                                        |                  |                    |    |     |  |
| GO:0002479 | 1.78801043514461e-06                                                                               | 13.9911764705882 | 0.581274652273199  |    |     |  |
| 7          | 75 antigen processing and presentation of exogenous peptide antigen via MHC class I, TAP-dependent |                  |                    |    |     |  |
| GO:0048002 | 1.87208952342203e-06                                                                               | 10.9530769230769 | 0.837035499273407  |    |     |  |
| 8          | 108 antigen processing and presentation of peptide antigen                                         |                  |                    |    |     |  |
| GO:0042590 | 2.54570325230481e-06                                                                               | 13.2101851851852 | 0.612275967061103  |    |     |  |
| 7          | 79 antigen processing and presentation of exogenous peptide antigen via MHC class I                |                  |                    |    |     |  |
| GO:0000075 | 2.74253804769764e-06                                                                               | 6.65157944365865 | 1.87557954466819   |    |     |  |
| 11         | 242 cell cycle checkpoint                                                                          |                  |                    |    |     |  |
| GO:0071158 | 2.7721241533322e-06                                                                                | 13.0283105022831 | 0.620026295758079  |    |     |  |
| 7          | 80 positive regulation of cell cycle arrest                                                        |                  |                    |    |     |  |
| GO:0031575 | 3.27562767974461e-06                                                                               | 12.6791111111111 | 0.635526953152031  |    |     |  |
| 7          | 82 mitotic cell cycle G1/S transition checkpoint                                                   |                  |                    |    |     |  |
| GO:0030330 | 3.42337532673402e-06                                                                               | 10.0423429781228 | 0.906788457546191  |    |     |  |
| 8          | 117 DNA damage response, signal transduction by p53 class mediator                                 |                  |                    |    |     |  |
| GO:0002478 | 3.55465313198523e-06                                                                               | 12.5114035087719 | 0.643277281849007  |    |     |  |
| 7          | 83 antigen processing and presentation of exogenous peptide antigen                                |                  |                    |    |     |  |
| GO:0031400 | 3.56660021202779e-06                                                                               | 5.85458333333333 | 2.3250986090928    | 12 |     |  |
| 300        | negative regulation of protein modification process                                                |                  |                    |    |     |  |
| GO:0019884 | 4.17240953611961e-06                                                                               | 12.1888888888889 | 0.658777939242959  |    |     |  |
| 7          | 85 antigen processing and presentation of exogenous antigen                                        |                  |                    |    |     |  |
| GO:0000959 | 4.36971911079224e-06                                                                               | 48.2424242424242 | 0.11625493045464   |    |     |  |
| 4          | 15 mitochondrial RNA metabolic process                                                             |                  |                    |    |     |  |
| GO:0070127 | 4.48128249109726e-06                                                                               | 197.298165137615 | 0.0387516434848799 |    |     |  |
| 3          | 5 tRNA aminoacylation for mitochondrial protein translation                                        |                  |                    |    |     |  |
| GO:0071779 | 4.51332815998386e-06                                                                               | 12.0337552742616 | 0.666528267939935  |    |     |  |
| 7          | 86 G1/S transition checkpoint                                                                      |                  |                    |    |     |  |

Stable4\_20PerPair

|                                                                    |                                                    |                                                                                                                           |                   |
|--------------------------------------------------------------------|----------------------------------------------------|---------------------------------------------------------------------------------------------------------------------------|-------------------|
| GO:0072331                                                         | 4.97523235956747e-06                               | 9.51438127090301                                                                                                          | 0.953290429728046 |
| 8                                                                  | 123                                                | signal transduction by p53 class mediator                                                                                 |                   |
| GO:0007050                                                         | 5.50619454687212e-06                               | 5.15772897514471                                                                                                          | 2.85987128918414  |
| 13                                                                 | 369                                                | cell cycle arrest                                                                                                         |                   |
| GO:0032269                                                         | 7.14397009421443e-06                               | 5.02731423827314                                                                                                          | 2.92962424745692  |
| 13                                                                 | 378                                                | negative regulation of cellular protein metabolic process                                                                 |                   |
| GO:0051329                                                         | 7.35017499124349e-06                               | 5.01321962797373                                                                                                          | 2.9373745761539   |
| 379                                                                |                                                    | interphase of mitotic cell cycle                                                                                          | 13                |
| GO:0000077                                                         | 7.50237979458588e-06                               | 8.9640605296343                                                                                                           | 1.00754273060688  |
| 130                                                                |                                                    | DNA damage checkpoint                                                                                                     | 8                 |
| GO:0051325                                                         | 9.19849866292754e-06                               | 4.90317614649165                                                                                                          | 2.99937720572971  |
| 13                                                                 | 387                                                | interphase                                                                                                                |                   |
| GO:0031570                                                         | 1.04609790727953e-05                               | 8.54026442307692                                                                                                          | 1.05404470278873  |
| 8                                                                  | 136                                                | DNA integrity checkpoint                                                                                                  |                   |
| GO:0002474                                                         | 1.15129659673872e-05                               | 10.3239130434783                                                                                                          | 0.767282541000623 |
| 7                                                                  | 99                                                 | antigen processing and presentation of peptide antigen via MHC class I                                                    |                   |
| GO:2000045                                                         | 1.15129659673872e-05                               | 10.3239130434783                                                                                                          | 0.767282541000623 |
| 7                                                                  | 99                                                 | regulation of G1/S transition of mitotic cell cycle                                                                       |                   |
| GO:0034660                                                         | 1.30103427658037e-05                               | 5.59062658090627                                                                                                          | 2.20884367863816  |
| 11                                                                 | 285                                                | ncRNA metabolic process                                                                                                   |                   |
| GO:0000082                                                         | 1.40440791450296e-05                               | 6.99127859141023                                                                                                          | 1.44156113763753  |
| 9                                                                  | 186                                                | G1/S transition of mitotic cell cycle                                                                                     |                   |
| GO:0010564                                                         | 1.88225320034168e-05                               | 4.56419557167687                                                                                                          | 3.20863608054806  |
| 13                                                                 | 414                                                | regulation of cell cycle process                                                                                          |                   |
| Tissue: Nerve_Tibial=>Thyroid                                      | Type: asymmetric                                   |                                                                                                                           |                   |
| SourceGene:                                                        | VNN2(ENSG00000112303.9)                            |                                                                                                                           |                   |
| TargetGeneSet:                                                     | C1QC C1QB RP1 CHI3L2 SLAMF8 FCER1G FCGR2A FCGR3A   |                                                                                                                           |                   |
| FCGR2B GALNT14 POLQ P2RY13 PDE6B CFI NDNF CD180 LY86 LST1 AIF1     |                                                    |                                                                                                                           |                   |
| HLA-DRA HLA-DOA SNX10 TFEC TBXAS1 SPI1 MS4A6A MS4A7 CTSC RAD51AP1  |                                                    |                                                                                                                           |                   |
| C3AR1 RP11 SLC26A10 BATF SAMD15 CD209 KANK2 ASF1B TYROBP           |                                                    |                                                                                                                           |                   |
| CYP2S1 CXCL17 SIGLEC10 CTD SIGLEC5 LAIR1 MIR1302-5 RGS19           |                                                    |                                                                                                                           |                   |
| ITGB2 GPR34 BTK                                                    |                                                    |                                                                                                                           |                   |
| GOBPID Pvalue OddsRatio ExpCount Count Size Term                   |                                                    |                                                                                                                           |                   |
| GO:0002460                                                         | 5.66274072390625e-07                               | 17.3561476837339                                                                                                          | 0.501003390768805 |
| 7                                                                  | 181                                                | adaptive immune response based on somatic recombination of immune receptors built from immunoglobulin superfamily domains |                   |
| GO:0002250                                                         | 1.03635928815936e-06                               | 15.7924797715374                                                                                                          | 0.548058957857588 |
| 7                                                                  | 198                                                | adaptive immune response                                                                                                  |                   |
| GO:0002253                                                         | 1.32280493150263e-06                               | 12.1305841924399                                                                                                          | 0.82762438585565  |
| 8                                                                  | 299                                                | activation of immune response                                                                                             |                   |
| GO:0050778                                                         | 5.70180234759249e-06                               | 9.87008426966292                                                                                                          | 1.00754273060688  |
| 8                                                                  | 364                                                | positive regulation of immune response                                                                                    |                   |
| GO:0002449                                                         | 6.03478962875416e-06                               | 15.6192911947388                                                                                                          | 0.462251747283925 |
| 6                                                                  | 167                                                | lymphocyte mediated immunity                                                                                              |                   |
| GO:0019724                                                         | 1.47667513385958e-05                               | 18.7444298820446                                                                                                          | 0.315549096948308 |
| 5                                                                  | 114                                                | B cell mediated immunity                                                                                                  |                   |
| Tissue: Nerve_Tibial=>Thyroid                                      | Type: asymmetric                                   |                                                                                                                           |                   |
| SourceGene:                                                        | ZNF214(ENSG00000149050.5)                          |                                                                                                                           |                   |
| TargetGeneSet:                                                     | NECAP2 RP4 HP1BP3 CEP85 HDAC1 SLFNL1 HHLA3 HSD3BP5 |                                                                                                                           |                   |
| INTS3 RP11 TDRD10 RUSC1-AS1 UBQLN4 CCT3 NEK7 KLHL12 RN5S78         |                                                    |                                                                                                                           |                   |
| PDIA6 C2orf43 SLC5A6 CAD TRMT61B THADA MSH2 PCBP1-AS1 CCT7         |                                                    |                                                                                                                           |                   |
| HTRA2 SEMA4F C2orf68 POLR1B TMEM177 ATIC BCS1L TTLL4 DTYMK TRANK1  |                                                    |                                                                                                                           |                   |
| LARS2 USP4 CBX5P1 CCDC14 PLXNA1 ATP2C1 ABCC5 ALG3 TBCCD1 LRCH3     |                                                    |                                                                                                                           |                   |
| ZNF141 TBC1D19 UGDH-AS1 TBCK CPE LPCAT1 CCT5 PAPD4 ZCCHC9          |                                                    |                                                                                                                           |                   |
| PCDHGC4 CTB RPL26L1 RPP40 ZSCAN23 C6orf25 AARS2 MCM3 MTO1 C6orf162 |                                                    |                                                                                                                           |                   |
| RP3 MRPL18 COL28A1 MIOS C7orf42 SGCE ZKSCAN1 SLC12A9 PLOD3 SMO     |                                                    |                                                                                                                           |                   |
| TAS2R5 POLR3D CHMP7 TTI2 C8orf40 LRRC6 JRK ZNF623 EXOSC4 SNAPC3    |                                                    |                                                                                                                           |                   |
| FAM205A VCP C9orf103 BICD2 TRIM32 TRAF1 TUBB4B ZNF239 ERCC6        |                                                    |                                                                                                                           |                   |
| AP3M1 EXOSC1 MORN4 ENTPD7 CYP2E1 POLR2L RP13 TCP11L1 TTC9C STIP1   |                                                    |                                                                                                                           |                   |
| GPR137 RBM14 RBM4B C2CD3 POLD3 ALG8 EED ATM DPAGT1 TIME218         |                                                    |                                                                                                                           |                   |
| RAD52 DCP1B FBKBP4 NCAPD2 KIAA1467 REP15 PAN2 STAT2 TIMELESS       |                                                    |                                                                                                                           |                   |
| NUP37 ALDH2 DYNLL1 RAN ST6GALNAC4P1 ZMYM2 ITM2B PCID2 TTC5 DAD1    |                                                    |                                                                                                                           |                   |

Stable4\_20PerPair

| GOBPID     | Pvalue                      | OddsRatio                                         | ExpCount         | Count | Size              | Term               |
|------------|-----------------------------|---------------------------------------------------|------------------|-------|-------------------|--------------------|
| GO:0006954 | 5.5734770359018e-10         |                                                   | 11.4728618421053 |       |                   | 1.66244550550135   |
| 14         | 462                         | inflammatory response                             |                  |       |                   |                    |
| GO:0002252 | 7.12235579674237e-10        |                                                   | 12.5344057193923 |       |                   | 1.38896962147948   |
| 13         | 386                         | immune effector process                           |                  |       |                   |                    |
| GO:0050778 | 4.5365958326799e-09         |                                                   | 11.971875        |       | 1.30980554978894  | 12                 |
| 364        | positive                    | regulation of immune response                     |                  |       |                   |                    |
| GO:0002253 | 7.03563355743526e-09        |                                                   | 13.1454098915989 |       |                   | 1.07591170161235   |
| 11         | 299                         | activation of immune response                     |                  |       |                   |                    |
| GO:0031347 | 1.495622186636e-07          |                                                   | 9.5866724738676  |       | 1.4501418586949   | 11 403             |
|            | regulation of               | defense response                                  |                  |       |                   |                    |
| GO:0030449 | 3.42675928321822e-07        |                                                   | 92.2179487179487 |       |                   | 0.0611722372154176 |
| 4          | 17                          | regulation of complement activation               |                  |       |                   |                    |
| GO:2000257 | 3.42675928321822e-07        |                                                   | 92.2179487179487 |       |                   | 0.0611722372154176 |
| 4          | 17                          | regulation of protein activation cascade          |                  |       |                   |                    |
| GO:0006909 | 6.08708689018233e-07        |                                                   | 23.3461956521739 |       |                   | 0.309459552972113  |
| 6          | 86                          | phagocytosis                                      |                  |       |                   |                    |
| GO:0071219 | 8.51283009204456e-07        |                                                   | 21.9652173913043 |       |                   | 0.327451387447236  |
| 6          | 91                          | cellular response to molecule of bacterial origin |                  |       |                   |                    |
| GO:0031349 | 8.72426768161208e-07        |                                                   | 12.5269196822595 |       |                   | 0.770050515535257  |
| 8          | 214                         | positive regulation of defense response           |                  |       |                   |                    |
| GO:0002673 | 1.02676702691067e-06        |                                                   | 33.1938020351526 |       |                   | 0.183516711646253  |
| 5          | 51                          | regulation of acute inflammatory response         |                  |       |                   |                    |
| GO:0071216 | 1.66876279571164e-06        |                                                   | 19.4334239130435 |       |                   | 0.367033423292506  |
| 6          | 102                         | cellular response to biotic stimulus              |                  |       |                   |                    |
| GO:0050727 | 2.8628699268569e-06         |                                                   | 13.1768518518519 |       |                   | 0.629714206629299  |
| 7          | 175                         | regulation of inflammatory response               |                  |       |                   |                    |
| GO:0001774 | 3.63567199059503e-06        |                                                   | 146.867346938776 |       |                   | 0.0323853020552211 |
| 3          | 9                           | microglial cell activation                        |                  |       |                   |                    |
| GO:0002920 | 3.81175880456876e-06        |                                                   | 46.0673076923077 |       |                   | 0.107951006850737  |
| 4          | 30                          | regulation of humoral immune response             |                  |       |                   |                    |
| GO:0007229 | 4.35105782734731e-06        |                                                   | 24.2080378250591 |       |                   | 0.24468894886167   |
| 5          | 68                          | integrin-mediated signaling pathway               |                  |       |                   |                    |
| GO:0032101 | 4.56601747025234e-06        |                                                   | 8.42606783501033 |       |                   | 1.28821534841879   |
| 9          | 358                         | regulation of response to external stimulus       |                  |       |                   |                    |
| GO:0006959 | 4.7428214144455e-06         |                                                   | 16.0603448275862 |       |                   | 0.439000761192997  |
| 6          | 122                         | humoral immune response                           |                  |       |                   |                    |
| GO:0070613 | 5.64636154537336e-06        |                                                   | 41.2931034482759 |       |                   | 0.118746107535811  |
| 4          | 33                          | regulation of protein processing                  |                  |       |                   |                    |
| GO:0002281 | 7.10524156150625e-06        |                                                   | 110.135204081633 |       |                   | 0.0395820358452702 |
| 3          | 11                          | macrophage activation involved in immune response |                  |       |                   |                    |
| GO:0031663 | 8.06349374928719e-06        |                                                   | 37.4140625       |       | 0.129541208220884 | 4                  |
| 36         | lipopolysaccharide-mediated | signaling pathway                                 |                  |       |                   |                    |
| GO:0042116 | 1.00509720627651e-05        |                                                   | 35.2083333333333 |       |                   | 0.136737942010934  |
| 4          | 38                          | macrophage activation                             |                  |       |                   |                    |
| GO:0045088 | 1.10908638510616e-05        |                                                   | 10.6129273504274 |       |                   | 0.773648882430282  |

Stable4\_20PerPair

|            |     |                                                            |                  |                    |                    |   |
|------------|-----|------------------------------------------------------------|------------------|--------------------|--------------------|---|
| 7          | 215 | regulation of innate immune response                       |                  |                    |                    |   |
| GO:0071222 |     | 1.38442755006828e-05                                       | 18.8048332019963 |                    | 0.309459552972113  |   |
| 5          | 86  | cellular response to lipopolysaccharide                    |                  |                    |                    |   |
| GO:0006957 |     | 1.55554109967332e-05                                       | 80.0816326530612 |                    | 0.0503771365303439 |   |
| 3          | 14  | complement activation, alternative pathway                 |                  |                    |                    |   |
| GO:0002757 |     | 1.9736253071039e-05                                        | 9.66832358674464 |                    | 0.845616220330773  |   |
| 7          | 235 | immune response-activating signal transduction             |                  |                    |                    |   |
| GO:0045089 |     | 2.01351993913003e-05                                       | 12.3075151166139 |                    | 0.564943602518857  |   |
| 6          | 157 | positive regulation of innate immune response              |                  |                    |                    |   |
| GO:0002275 |     | 2.1752826216248e-05                                        | 28.4861111111111 |                    | 0.16552487717113   |   |
| 4          | 46  | myeloid cell activation involved in immune response        |                  |                    |                    |   |
| GO:0002764 |     | 2.78970365820371e-05                                       | 9.13840479483633 |                    | 0.892394989966092  |   |
| 7          | 248 | immune response-regulating signaling pathway               |                  |                    |                    |   |
| GO:0002526 |     | 3.64588615020768e-05                                       | 15.2117021276596 |                    | 0.377828523977579  |   |
| 5          | 105 | acute inflammatory response                                |                  |                    |                    |   |
| GO:0001794 |     | 3.80124591832027e-05                                       | 575.92           | 0.0107951006850737 | 2                  | 3 |
|            |     | type IIa hypersensitivity                                  |                  |                    |                    |   |
| GO:0001796 |     | 3.80124591832027e-05                                       | 575.92           | 0.0107951006850737 | 2                  | 3 |
|            |     | regulation of type IIa hypersensitivity                    |                  |                    |                    |   |
| GO:0001798 |     | 3.80124591832027e-05                                       | 575.92           | 0.0107951006850737 | 2                  | 3 |
|            |     | positive regulation of type IIa hypersensitivity           |                  |                    |                    |   |
| GO:0002445 |     | 3.80124591832027e-05                                       | 575.92           | 0.0107951006850737 | 2                  | 3 |
|            |     | type II hypersensitivity                                   |                  |                    |                    |   |
| GO:0002888 |     | 3.80124591832027e-05                                       | 575.92           | 0.0107951006850737 | 2                  | 3 |
|            |     | positive regulation of myeloid leukocyte mediated immunity |                  |                    |                    |   |
| GO:0002892 |     | 3.80124591832027e-05                                       | 575.92           | 0.0107951006850737 | 2                  | 3 |
|            |     | regulation of type II hypersensitivity                     |                  |                    |                    |   |
| GO:0002894 |     | 3.80124591832027e-05                                       | 575.92           | 0.0107951006850737 | 2                  | 3 |
|            |     | positive regulation of type II hypersensitivity            |                  |                    |                    |   |
| GO:0002274 |     | 3.9922535995047e-05                                        | 14.9113475177305 |                    | 0.385025257767629  |   |
| 5          | 107 | myeloid leukocyte activation                               |                  |                    |                    |   |
| GO:0016064 |     | 4.76115698302669e-05                                       | 14.3446407065436 |                    | 0.399418725347727  |   |
| 5          | 111 | immunoglobulin mediated immune response                    |                  |                    |                    |   |
| GO:0019724 |     | 5.4094204510524e-05                                        | 13.9469061097013 |                    | 0.4102138260328    | 5 |
| 114        |     | B cell mediated immunity                                   |                  |                    |                    |   |
| GO:0006968 |     | 6.26313193173497e-05                                       | 21.34375         | 0.215902013701474  |                    | 4 |
| 60         |     | cellular defense response                                  |                  |                    |                    |   |
| GO:0006956 |     | 7.59000707383041e-05                                       | 20.2542372881356 |                    | 0.226697114386548  |   |
| 4          | 63  | complement activation                                      |                  |                    |                    |   |
| GO:0002263 |     | 7.77010228724405e-05                                       | 12.8750450775334 |                    | 0.442599128088022  |   |
| 5          | 123 | cell activation involved in immune response                |                  |                    |                    |   |
| GO:0002366 |     | 7.77010228724405e-05                                       | 12.8750450775334 |                    | 0.442599128088022  |   |
| 5          | 123 | leukocyte activation involved in immune response           |                  |                    |                    |   |
| GO:0002697 |     | 8.03121432507186e-05                                       | 9.5010033444816  | 0.723271745899938  |                    | 6 |
| 201        |     | regulation of immune effector process                      |                  |                    |                    |   |
| GO:0002758 |     | 9.3860821222551e-05                                        | 12.3473447500432 |                    | 0.460590962563144  |   |
| 5          | 128 | innate immune response-activating signal transduction      |                  |                    |                    |   |
| GO:0002218 |     | 0.000101002938279896                                       | 12.148085106383  | 0.467787696353194  |                    | 5 |
| 130        |     | activation of innate immune response                       |                  |                    |                    |   |
| GO:0032640 |     | 0.000108416217172059                                       | 18.3769230769231 |                    | 0.248287315756695  |   |
| 4          | 69  | tumor necrosis factor production                           |                  |                    |                    |   |
| GO:0032680 |     | 0.000108416217172059                                       | 18.3769230769231 |                    | 0.248287315756695  |   |
| 4          | 69  | regulation of tumor necrosis factor production             |                  |                    |                    |   |
| GO:0002282 |     | 0.000126124456521837                                       | 191.946666666667 |                    | 0.0179918344751228 |   |
| 2          | 5   | microglial cell activation involved in immune response     |                  |                    |                    |   |
| GO:0002237 |     | 0.000131959095993139                                       | 8.64587566030069 |                    | 0.791640716905404  |   |
| 6          | 220 | response to molecule of bacterial origin                   |                  |                    |                    |   |
| GO:0071706 |     | 0.000135058853366826                                       | 17.3067632850242 |                    | 0.262680783336793  |   |
| 4          | 73  | tumor necrosis factor superfamily cytokine production      |                  |                    |                    |   |
| GO:0002885 |     | 0.000188750548594402                                       | 143.95           | 0.0215902013701474 | 2                  | 6 |
|            |     | positive regulation of hypersensitivity                    |                  |                    |                    |   |
| GO:0002889 |     | 0.000202487136379226                                       | 30.3377902885292 |                    | 0.115147740640786  |   |
| 3          | 32  | regulation of immunoglobulin mediated immune response      |                  |                    |                    |   |

Stable4\_20PerPair

|                                                                          |                                          |                                                                                                                           |                    |      |
|--------------------------------------------------------------------------|------------------------------------------|---------------------------------------------------------------------------------------------------------------------------|--------------------|------|
| GO:0009617                                                               | 0.000209391343195116                     | 6.53054726368159                                                                                                          | 1.2306414780984    | 7    |
| 342                                                                      | response to bacterium                    |                                                                                                                           |                    |      |
| GO:0072376                                                               | 0.000211917767969644                     | 15.3002136752137                                                                                                          | 0.295066085392014  |      |
| 4                                                                        | 82                                       | protein activation cascade                                                                                                |                    |      |
| GO:0050900                                                               | 0.000216623847505622                     | 7.86160962072155                                                                                                          | 0.86720642170092   |      |
| 6                                                                        | 241                                      | leukocyte migration                                                                                                       |                    |      |
| GO:0006897                                                               | 0.000220888078517393                     | 6.47120315581854                                                                                                          | 1.24143657878348   |      |
| 7                                                                        | 345                                      | endocytosis                                                                                                               |                    |      |
| GO:0002576                                                               | 0.000222058612382156                     | 15.1054852320675                                                                                                          | 0.298664452287039  |      |
| 4                                                                        | 83                                       | platelet degranulation                                                                                                    |                    |      |
| GO:0002712                                                               | 0.000222171213862611                     | 29.3244897959184                                                                                                          | 0.118746107535811  |      |
| 3                                                                        | 33                                       | regulation of B cell mediated immunity                                                                                    |                    |      |
| GO:0002866                                                               | 0.000263641729934762                     | 115.152                                                                                                                   | 0.025188568265172  | 2 7  |
| positive regulation of acute inflammatory response to antigenic stimulus |                                          |                                                                                                                           |                    |      |
| GO:0002449                                                               | 0.00032529170250609                      | 9.34922511163646                                                                                                          | 0.600927271469103  |      |
| 5                                                                        | 167                                      | lymphocyte mediated immunity                                                                                              |                    |      |
| GO:0006887                                                               | 0.000332520106185679                     | 7.23478260869565                                                                                                          | 0.939173759601412  |      |
| 6                                                                        | 261                                      | exocytosis                                                                                                                |                    |      |
| GO:0050764                                                               | 0.000339187854369615                     | 25.1265306122449                                                                                                          | 0.136737942010934  |      |
| 3                                                                        | 38                                       | regulation of phagocytosis                                                                                                |                    |      |
| GO:0002524                                                               | 0.000350712320370144                     | 95.95333333333333                                                                                                         | 0.0287869351601965 |      |
| 2                                                                        | 8                                        | hypersensitivity                                                                                                          |                    |      |
| GO:0002883                                                               | 0.000350712320370144                     | 95.95333333333333                                                                                                         | 0.0287869351601965 |      |
| 2                                                                        | 8                                        | regulation of hypersensitivity                                                                                            |                    |      |
| GO:0032490                                                               | 0.000350712320370144                     | 95.95333333333333                                                                                                         | 0.0287869351601965 |      |
| 2                                                                        | 8                                        | detection of molecule of bacterial origin                                                                                 |                    |      |
| GO:0002460                                                               | 0.00047064011604471                      | 8.59707446808511                                                                                                          | 0.651304407999446  |      |
| 5                                                                        | 181                                      | adaptive immune response based on somatic recombination of immune receptors built from immunoglobulin superfamily domains |                    |      |
| GO:0002863                                                               | 0.0005610511925052                       | 71.955                                                                                                                    | 0.0359836689502457 | 2 10 |
| positive regulation of inflammatory response to antigenic stimulus       |                                          |                                                                                                                           |                    |      |
| GO:0002864                                                               | 0.0005610511925052                       | 71.955                                                                                                                    | 0.0359836689502457 | 2 10 |
| regulation of acute inflammatory response to antigenic stimulus          |                                          |                                                                                                                           |                    |      |
| GO:0016485                                                               | 0.000564831236692845                     | 11.68055555555556                                                                                                         | 0.381426890872604  |      |
| 4                                                                        | 106                                      | protein processing                                                                                                        |                    |      |
| GO:0002224                                                               | 0.000672007986874714                     | 11.1308411214953                                                                                                          | 0.399418725347727  |      |
| 4                                                                        | 111                                      | toll-like receptor signaling pathway                                                                                      |                    |      |
| GO:0030595                                                               | 0.000672007986874714                     | 11.1308411214953                                                                                                          | 0.399418725347727  |      |
| 4                                                                        | 111                                      | leukocyte chemotaxis                                                                                                      |                    |      |
| GO:0002283                                                               | 0.000684150292714912                     | 63.95555555555556                                                                                                         | 0.0395820358452702 |      |
| 2                                                                        | 11                                       | neutrophil activation involved in immune response                                                                         |                    |      |
| GO:0002438                                                               | 0.000684150292714912                     | 63.95555555555556                                                                                                         | 0.0395820358452702 |      |
| 2                                                                        | 11                                       | acute inflammatory response to antigenic stimulus                                                                         |                    |      |
| GO:0002250                                                               | 0.000707554587946299                     | 7.83044868261493                                                                                                          | 0.712476645214864  |      |
| 5                                                                        | 198                                      | adaptive immune response                                                                                                  |                    |      |
| GO:0051604                                                               | 0.000818774151314756                     | 10.5353982300885                                                                                                          | 0.421008926717874  |      |
| 4                                                                        | 117                                      | protein maturation                                                                                                        |                    |      |
| GO:0045351                                                               | 0.000819090435181635                     | 57.556                                                                                                                    | 0.0431804027402948 | 2 12 |
| type I interferon biosynthetic process                                   |                                          |                                                                                                                           |                    |      |
| GO:0071260                                                               | 0.000857603344496901                     | 17.930029154519                                                                                                           | 0.187115078541277  | 3    |
| 52                                                                       | cellular response to mechanical stimulus |                                                                                                                           |                    |      |
| GO:0032496                                                               | 0.000883257672061884                     | 7.43947175348496                                                                                                          | 0.74846031416511   |      |
| 5                                                                        | 208                                      | response to lipopolysaccharide                                                                                            |                    |      |
| GO:0002443                                                               | 0.000941813331973893                     | 7.32958066515183                                                                                                          | 0.759255414850183  |      |
| 5                                                                        | 211                                      | leukocyte mediated immunity                                                                                               |                    |      |
| GO:0002714                                                               | 0.000965788107013885                     | 52.32                                                                                                                     | 0.0467787696353194 | 2 13 |
| positive regulation of B cell mediated immunity                          |                                          |                                                                                                                           |                    |      |
| GO:0002891                                                               | 0.000965788107013885                     | 52.32                                                                                                                     | 0.0467787696353194 | 2 13 |
| positive regulation of immunoglobulin mediated immune response           |                                          |                                                                                                                           |                    |      |
| GO:0002221                                                               | 0.00101707625361233                      | 9.91597222222222                                                                                                          | 0.446197494983046  |      |
| 4                                                                        | 124                                      | pattern recognition receptor signaling pathway                                                                            |                    |      |
| GO:0030168                                                               | 0.00106755609284447                      | 7.11912886391008                                                                                                          | 0.780845616220331  |      |
| 5                                                                        | 217                                      | platelet activation                                                                                                       |                    |      |

Stable4\_20PerPair

|            |                     |                                                                                                                                         |                    |   |     |
|------------|---------------------|-----------------------------------------------------------------------------------------------------------------------------------------|--------------------|---|-----|
| GO:0042108 | 0.00123937544339854 | 15.6811224489796                                                                                                                        | 0.212303646806449  |   |     |
| 3          | 59                  | positive regulation of cytokine biosynthetic process                                                                                    |                    |   |     |
| GO:0006911 | 0.00129412412379021 | 44.2646153846154                                                                                                                        | 0.0539755034253685 |   |     |
| 2          | 15                  | phagocytosis, engulfment                                                                                                                |                    |   |     |
| GO:0050865 | 0.00138844014391652 | 5.44265256095988                                                                                                                        | 1.23423984499343   |   |     |
| 6          | 343                 | regulation of cell activation                                                                                                           |                    |   |     |
| GO:0060326 | 0.00143200011832707 | 9.006944444444444                                                                                                                       | 0.489377897723341  |   |     |
| 4          | 136                 | cell chemotaxis                                                                                                                         |                    |   |     |
| GO:0030193 | 0.00149870439702866 | 14.6316326530612                                                                                                                        | 0.226697114386548  |   |     |
| 3          | 63                  | regulation of blood coagulation                                                                                                         |                    |   |     |
| GO:0032675 | 0.00149870439702866 | 14.6316326530612                                                                                                                        | 0.226697114386548  |   |     |
| 3          | 63                  | regulation of interleukin-6 production                                                                                                  |                    |   |     |
| GO:1900046 | 0.00149870439702866 | 14.6316326530612                                                                                                                        | 0.226697114386548  |   |     |
| 3          | 63                  | regulation of hemostasis                                                                                                                |                    |   |     |
| GO:0042742 | 0.00163539136201152 | 8.67518248175183                                                                                                                        | 0.507369732198464  |   |     |
| 4          | 141                 | defense response to bacterium                                                                                                           |                    |   |     |
| GO:0032635 | 0.00164018012153783 | 14.1576695194207                                                                                                                        | 0.233893848176597  |   |     |
| 3          | 65                  | interleukin-6 production                                                                                                                |                    |   |     |
| GO:0050867 | 0.00166773326873936 | 6.41195110909914                                                                                                                        | 0.863608054805896  |   |     |
| 5          | 240                 | positive regulation of cell activation                                                                                                  |                    |   |     |
| GO:0010324 | 0.00166849875966769 | 38.3573333333333                                                                                                                        | 0.0611722372154176 |   |     |
| 2          | 17                  | membrane invagination                                                                                                                   |                    |   |     |
| GO:0001817 | 0.00175072619479345 | 5.19004803547235                                                                                                                        | 1.29181371531382   |   |     |
| 6          | 359                 | regulation of cytokine production                                                                                                       |                    |   |     |
| GO:0050818 | 0.00186763486545887 | 13.5014128728414                                                                                                                        | 0.24468894886167   |   |     |
| 3          | 68                  | regulation of coagulation                                                                                                               |                    |   |     |
| GO:0002861 | 0.00187274628793963 | 35.9575                                                                                                                                 | 0.0647706041104422 | 2 | 18  |
|            |                     | regulation of inflammatory response to antigenic stimulus                                                                               |                    |   |     |
| GO:0051017 | 0.00194759934947191 | 13.2959183673469                                                                                                                        | 0.248287315756695  |   |     |
| 3          | 69                  | actin filament bundle assembly                                                                                                          |                    |   |     |
| GO:0042119 | 0.00208825918356867 | 33.84                                                                                                                                   | 0.0683689710054668 | 2 | 19  |
|            |                     | neutrophil activation                                                                                                                   |                    |   |     |
| GO:0002706 | 0.00228871577238622 | 12.5326530612245                                                                                                                        | 0.262680783336793  |   |     |
| 3          | 73                  | regulation of lymphocyte mediated immunity                                                                                              |                    |   |     |
| GO:0042994 | 0.00231495688787468 | 31.9577777777778                                                                                                                        | 0.0719673379004913 |   |     |
| 2          | 20                  | cytoplasmic sequestering of transcription factor                                                                                        |                    |   |     |
| GO:0031529 | 0.00255275925672425 | 30.2736842105263                                                                                                                        | 0.0755657047955159 |   |     |
| 2          | 21                  | ruffle organization                                                                                                                     |                    |   |     |
| GO:0045766 | 0.00276435842778494 | 11.6930612244898                                                                                                                        | 0.280672617811916  |   |     |
| 3          | 78                  | positive regulation of angiogenesis                                                                                                     |                    |   |     |
| GO:0010543 | 0.00280158655868265 | 28.758                                                                                                                                  | 0.0791640716905404 | 2 | 22  |
|            |                     | regulation of platelet activation                                                                                                       |                    |   |     |
| GO:0001816 | 0.00282647226772585 | 4.69766402145971                                                                                                                        | 1.4213549235347    | 6 |     |
| 395        |                     | cytokine production                                                                                                                     |                    |   |     |
| GO:0061041 | 0.00286623451783342 | 11.5383995703545                                                                                                                        | 0.284270984706941  |   |     |
| 3          | 79                  | regulation of wound healing                                                                                                             |                    |   |     |
| GO:0002822 | 0.00297040038127584 | 11.3877551020408                                                                                                                        | 0.287869351601965  |   |     |
| 3          | 80                  | regulation of adaptive immune response based on somatic recombination of immune receptors built from immunoglobulin superfamily domains |                    |   |     |
| GO:0002886 | 0.00306135947317336 | 27.3866666666667                                                                                                                        | 0.082762438585565  |   |     |
| 2          | 23                  | regulation of myeloid leukocyte mediated immunity                                                                                       |                    |   |     |
| GO:0002675 | 0.00333199908864514 | 26.14                                                                                                                                   | 0.0863608054805896 | 2 | 24  |
|            |                     | positive regulation of acute inflammatory response                                                                                      |                    |   |     |
| GO:0051220 | 0.00333199908864514 | 26.14                                                                                                                                   | 0.0863608054805896 | 2 | 24  |
|            |                     | cytoplasmic sequestering of protein                                                                                                     |                    |   |     |
| GO:0046651 | 0.00336308482564778 | 7.05902777777778                                                                                                                        | 0.618919105944225  |   |     |
| 4          | 172                 | lymphocyte proliferation                                                                                                                |                    |   |     |
| GO:0032943 | 0.00350517443624208 | 6.975                                                                                                                                   | 0.626115839734274  | 4 | 174 |
|            |                     | mononuclear cell proliferation                                                                                                          |                    |   |     |
| GO:0002819 | 0.0037650599096333  | 10.4336734693878                                                                                                                        | 0.313057919867137  |   |     |
| 3          | 87                  | regulation of adaptive immune response                                                                                                  |                    |   |     |
| GO:0009595 | 0.00390556481050803 | 23.9583333333333                                                                                                                        | 0.0935575392706387 |   |     |
| 2          | 26                  | detection of biotic stimulus                                                                                                            |                    |   |     |

Stable4\_20PerPair

|                                                                                                                                                  |                     |                                                                 |                    |
|--------------------------------------------------------------------------------------------------------------------------------------------------|---------------------|-----------------------------------------------------------------|--------------------|
| GO:0045730                                                                                                                                       | 0.00390556481050803 | 23.9583333333333                                                | 0.0935575392706387 |
| 2                                                                                                                                                | 26                  | respiratory burst                                               |                    |
| GO:0070661                                                                                                                                       | 0.00411449750560518 | 6.65777153558052                                                | 0.654902774894471  |
| 4                                                                                                                                                | 182                 | leukocyte proliferation                                         |                    |
| GO:0042035                                                                                                                                       | 0.00427199267749964 | 9.95663265306122                                                | 0.327451387447236  |
| 3                                                                                                                                                | 91                  | regulation of cytokine biosynthetic process                     |                    |
| GO:0002703                                                                                                                                       | 0.00440487920668883 | 9.84407246044485                                                | 0.33104975434226   |
| 3                                                                                                                                                | 92                  | regulation of leukocyte mediated immunity                       |                    |
| GO:0043647                                                                                                                                       | 0.00452166054318574 | 22.1123076923077                                                | 0.100754273060688  |
| 2                                                                                                                                                | 28                  | inositol phosphate metabolic process                            |                    |
| GO:0050766                                                                                                                                       | 0.00484546417881378 | 21.2918518518519                                                | 0.104352639955712  |
| 2                                                                                                                                                | 29                  | positive regulation of phagocytosis                             |                    |
| GO:0070098                                                                                                                                       | 0.00517966953394122 | 20.53                                                           | 0.107951006850737  |
|                                                                                                                                                  |                     |                                                                 | 2                  |
|                                                                                                                                                  |                     |                                                                 | 30                 |
| chemokine-mediated signaling pathway                                                                                                             |                     |                                                                 |                    |
| GO:0007015                                                                                                                                       | 0.0052514727330191  | 6.19895287958115                                                | 0.70168154452979   |
| 4                                                                                                                                                | 195                 | actin filament organization                                     |                    |
| GO:0000387                                                                                                                                       | 0.00552420050949671 | 19.8206896551724                                                | 0.111549373745762  |
| 2                                                                                                                                                | 31                  | spliceosomal snRNP assembly                                     |                    |
| GO:0032755                                                                                                                                       | 0.00552420050949671 | 19.8206896551724                                                | 0.111549373745762  |
| 2                                                                                                                                                | 31                  | positive regulation of interleukin-6 production                 |                    |
| GO:0042089                                                                                                                                       | 0.00555871085164821 | 9.0271407532085                                                 | 0.359836689502457  |
| 100                                                                                                                                              |                     | cytokine biosynthetic process                                   | 3                  |
| GO:0043900                                                                                                                                       | 0.00571447498593333 | 8.93440233236152                                                | 0.363435056397481  |
| 3                                                                                                                                                | 101                 | regulation of multi-organism process                            |                    |
| GO:0002694                                                                                                                                       | 0.00579991613209956 | 4.74111230810665                                                | 1.15507577330289   |
| 5                                                                                                                                                | 321                 | regulation of leukocyte activation                              |                    |
| GO:0060627                                                                                                                                       | 0.00584089060823485 | 6.00761421319797                                                | 0.723271745899938  |
| 4                                                                                                                                                | 201                 | regulation of vesicle-mediated transport                        |                    |
| GO:0042107                                                                                                                                       | 0.00587284324787367 | 8.84353741496599                                                | 0.367033423292506  |
| 3                                                                                                                                                | 102                 | cytokine metabolic process                                      |                    |
| GO:0002437                                                                                                                                       | 0.00587898140103788 | 19.1586666666667                                                | 0.115147740640786  |
| 2                                                                                                                                                | 32                  | inflammatory response to antigenic stimulus                     |                    |
| GO:0032760                                                                                                                                       | 0.00587898140103788 | 19.1586666666667                                                | 0.115147740640786  |
| 2                                                                                                                                                | 32                  | positive regulation of tumor necrosis factor production         |                    |
| GO:0042992                                                                                                                                       | 0.00587898140103788 | 19.1586666666667                                                | 0.115147740640786  |
| 2                                                                                                                                                | 32                  | negative regulation of transcription factor import into nucleus |                    |
| GO:0008154                                                                                                                                       | 0.00705528491353845 | 8.25548710050058                                                | 0.392221991557678  |
| 3                                                                                                                                                | 109                 | actin polymerization or depolymerization                        |                    |
| GO:0007249                                                                                                                                       | 0.00726627631974132 | 5.63055555555556                                                | 0.770050515535257  |
| 4                                                                                                                                                | 214                 | I-kappaB kinase/NF-kappaB cascade                               |                    |
| GO:0050830                                                                                                                                       | 0.00739910375149829 | 16.9                                                            | 0.129541208220884  |
|                                                                                                                                                  |                     |                                                                 | 2                  |
|                                                                                                                                                  |                     |                                                                 | 36                 |
| defense response to Gram-positive bacterium                                                                                                      |                     |                                                                 |                    |
| GO:0043299                                                                                                                                       | 0.0082187248167956  | 15.9588888888889                                                | 0.136737942010934  |
| 2                                                                                                                                                | 38                  | leukocyte degranulation                                         |                    |
| GO:0007596                                                                                                                                       | 0.00864094515181872 | 3.68690349946978                                                | 1.79198671372223   |
| 6                                                                                                                                                | 498                 | blood coagulation                                               |                    |
| GO:0048661                                                                                                                                       | 0.00864316817551764 | 15.5264864864865                                                | 0.140336308905958  |
| 2                                                                                                                                                | 39                  | positive regulation of smooth muscle cell proliferation         |                    |
| GO:0009612                                                                                                                                       | 0.00876971944583186 | 7.60461401952085                                                | 0.424607293612899  |
| 3                                                                                                                                                | 118                 | response to mechanical stimulus                                 |                    |
| GO:0030100                                                                                                                                       | 0.00876971944583186 | 7.60461401952085                                                | 0.424607293612899  |
| 3                                                                                                                                                | 118                 | regulation of endocytosis                                       |                    |
| GO:0071496                                                                                                                                       | 0.0094543803305764  | 5.20264317180617                                                | 0.831222752750675  |
| 4                                                                                                                                                | 231                 | cellular response to external stimulus                          |                    |
| GO:0002696                                                                                                                                       | 0.00973707704665    | 5.15647743813683                                                | 0.838419486540724  |
| 4                                                                                                                                                | 233                 | positive regulation of leukocyte activation                     |                    |
| GO:0010951                                                                                                                                       | 0.00981881947496151 | 7.28520408163265                                                | 0.442599128088022  |
| 3                                                                                                                                                | 123                 | negative regulation of endopeptidase activity                   |                    |
| GO:0002824                                                                                                                                       | 0.00997415936298272 | 14.359                                                          | 0.151131409591032  |
|                                                                                                                                                  |                     |                                                                 | 2                  |
|                                                                                                                                                  |                     |                                                                 | 42                 |
| positive regulation of adaptive immune response based on somatic recombination of immune receptors built from immunoglobulin superfamily domains |                     |                                                                 |                    |
| Tissue: Skin_Sun_Exposed_Lower_leg=>Thyroid                                                                                                      |                     | Type: asymmetric                                                |                    |
| SourceGene: C2orf68(ENSG00000168887.6)                                                                                                           |                     |                                                                 |                    |



Stable4\_20PerPair

| TargetGeneSet: | MRPL20                              | RBMXL1                                                                               | HAX1             | ADAR     | ISG20L2   | ATF6               | RP11    | DHX9   |         |
|----------------|-------------------------------------|--------------------------------------------------------------------------------------|------------------|----------|-----------|--------------------|---------|--------|---------|
| MIR4426        | QARS                                | HNRNPU                                                                               | RNASEH1          | DDX1     | POTEE     | XRCC5              | TRIP12  | CIDCEP | FANCD2  |
| CTNNB1         | SPCS1                               | POLR2B                                                                               | NUP155           | SKIV2L2  | ANKRA2    | CTD                | AP3S1   | DDX46  | IK      |
| LARP1          | C6orf47                             | FTSJD2                                                                               | UNC5CL           | RPL24P4  | LYRM2     | RPL23P8            | POLR2J3 | ASH2L  | JPH1    |
| ST13P6         | SMU1                                | SMC3                                                                                 | NUP160           | STX5     | DLAT      | PRKAG1             | BAZ2A   | CHST11 | RPS11P5 |
| ATP11A         | TOX4                                | DCAF11                                                                               | DLST             | HMG2P5   | ARHGAP11B | AQR                | HMG2P46 |        |         |
| IDH3A          | C15orf38                            |                                                                                      | SV2B             | FUS      | UBE2MP1   | CIRH1A             | SF3B3   | TSR1   | TP53    |
| VAMP2          | TMEM199                             | CTB                                                                                  | PIGS             | FAM134C  | PSME3     | DHX8               | KPNB1   | ARMC7  | MRPS7   |
| CEP76          | PIK3C3                              | CTIF                                                                                 | ZNF407           | C19orf38 |           | EMR2               | UBE2M   | RPS10L | RP4     |
| DDX27          | TPTE                                | SON                                                                                  | APOL6            | TOMM22   | ADSL      | PPPDE2             | TCF20   | USP9X  | RP6     |
| SLC35A2        | NONO                                | EIF4A1P2                                                                             |                  |          |           |                    |         |        |         |
| GOBPID         | Pvalue                              | OddsRatio                                                                            | ExpCount         | Count    | Size      | Term               |         |        |         |
| GO:0006397     |                                     | 8.48042610623201e-11                                                                 | 10.4408802685565 |          |           | 1.98795931077434   |         |        |         |
| 16             | 399                                 | mRNA processing                                                                      |                  |          |           |                    |         |        |         |
| GO:0008380     |                                     | 5.45111296043078e-10                                                                 | 10.9909608302645 |          |           | 1.60930039443637   |         |        |         |
| 14             | 323                                 | RNA splicing                                                                         |                  |          |           |                    |         |        |         |
| GO:0000377     |                                     | 6.31346020257997e-08                                                                 | 11.7933155969405 |          |           | 1.01640024911771   |         |        |         |
| 10             | 204                                 | RNA splicing, via transesterification reactions with bulged adenosine as nucleophile |                  |          |           |                    |         |        |         |
| GO:0000398     |                                     | 6.31346020257997e-08                                                                 | 11.7933155969405 |          |           | 1.01640024911771   |         |        |         |
| 10             | 204                                 | nuclear mRNA splicing, via spliceosome                                               |                  |          |           |                    |         |        |         |
| GO:0000375     |                                     | 7.92964531613603e-08                                                                 | 11.4929486140379 |          |           | 1.04131201992942   |         |        |         |
| 10             | 209                                 | RNA splicing, via transesterification reactions                                      |                  |          |           |                    |         |        |         |
| GO:0070934     |                                     | 0.000242444194982661                                                                 | 136.914285714286 |          |           | 0.0249117708117085 |         |        |         |
| 2              | 5                                   | CRD-mediated mRNA stabilization                                                      |                  |          |           |                    |         |        |         |
| GO:0016556     |                                     | 0.000505853434055779                                                                 | 82.1371428571429 |          |           | 0.0348764791363919 |         |        |         |
| 2              | 7                                   | mRNA modification                                                                    |                  |          |           |                    |         |        |         |
| GO:0006734     |                                     | 0.000672296726269301                                                                 | 68.4428571428571 |          |           | 0.0398588332987337 |         |        |         |
| 2              | 8                                   | NADH metabolic process                                                               |                  |          |           |                    |         |        |         |
| GO:0009060     |                                     | 0.00118431792286366                                                                  | 15.9866220735786 |          |           | 0.209258874818352  |         |        |         |
| 3              | 42                                  | aerobic respiration                                                                  |                  |          |           |                    |         |        |         |
| GO:0006084     |                                     | 0.00208065862872541                                                                  | 12.9809782608696 |          |           | 0.254100062279427  |         |        |         |
| 3              | 51                                  | acetyl-CoA metabolic process                                                         |                  |          |           |                    |         |        |         |
| GO:0006281     |                                     | 0.00291638866751573                                                                  | 4.01067921440262 |          |           | 1.90824164417687   |         |        |         |
| 7              | 383                                 | DNA repair                                                                           |                  |          |           |                    |         |        |         |
| GO:0006103     |                                     | 0.00396282855922372                                                                  | 24.1378151260504 |          |           | 0.0946647290844924 |         |        |         |
| 2              | 19                                  | 2-oxoglutarate metabolic process                                                     |                  |          |           |                    |         |        |         |
| GO:0031023     |                                     | 0.00415249566492265                                                                  | 10.0399719495091 |          |           | 0.323853020552211  |         |        |         |
| 3              | 65                                  | microtubule organizing center organization                                           |                  |          |           |                    |         |        |         |
| GO:0022613     |                                     | 0.00525545134936841                                                                  | 4.80291723202171 |          |           | 1.12102968652688   |         |        |         |
| 5              | 225                                 | ribonucleoprotein complex biogenesis                                                 |                  |          |           |                    |         |        |         |
| GO:0006091     |                                     | 0.00535079247908876                                                                  | 3.57047323223095 |          |           | 2.13244758148225   |         |        |         |
| 7              | 428                                 | generation of precursor metabolites and energy                                       |                  |          |           |                    |         |        |         |
| GO:0071843     |                                     | 0.006755172069383                                                                    | 4.51109835438194 |          |           | 1.19078264479967   |         |        |         |
| 5              | 239                                 | cellular component biogenesis at cellular level                                      |                  |          |           |                    |         |        |         |
| GO:0019674     |                                     | 0.00681960983346149                                                                  | 17.8335403726708 |          |           | 0.124558854058543  |         |        |         |
| 2              | 25                                  | NAD metabolic process                                                                |                  |          |           |                    |         |        |         |
| GO:0043489     |                                     | 0.00681960983346149                                                                  | 17.8335403726708 |          |           | 0.124558854058543  |         |        |         |
| 2              | 25                                  | RNA stabilization                                                                    |                  |          |           |                    |         |        |         |
| GO:0048255     |                                     | 0.00681960983346149                                                                  | 17.8335403726708 |          |           | 0.124558854058543  |         |        |         |
| 2              | 25                                  | mRNA stabilization                                                                   |                  |          |           |                    |         |        |         |
| GO:0006099     |                                     | 0.00736424552645795                                                                  | 17.0892857142857 |          |           | 0.129541208220884  |         |        |         |
| 2              | 26                                  | tricarboxylic acid cycle                                                             |                  |          |           |                    |         |        |         |
| GO:0009267     |                                     | 0.00792740317942642                                                                  | 7.87011557512383 |          |           | 0.40855304131202   |         |        |         |
| 3              | 82                                  | cellular response to starvation                                                      |                  |          |           |                    |         |        |         |
| GO:0046356     |                                     | 0.00792791798315694                                                                  | 16.4045714285714 |          |           | 0.134523562383226  |         |        |         |
| 2              | 27                                  | acetyl-CoA catabolic process                                                         |                  |          |           |                    |         |        |         |
| GO:0006370     |                                     | 0.00973118536622807                                                                  | 14.6438775510204 |          |           | 0.149470624870251  |         |        |         |
| 2              | 30                                  | 7-methylguanosine mRNA capping                                                       |                  |          |           |                    |         |        |         |
| Tissue:        | Skin_Sun_Exposed_Lower_leg=>Thyroid |                                                                                      |                  |          |           | Type:              | cluster |        |         |
| SourceGene:    | C2orf68(ENSG00000168887.6)          |                                                                                      |                  |          |           |                    |         |        |         |
| TargetGeneSet: | MRPL20                              | RBMXL1                                                                               | HAX1             | ADAR     | ISG20L2   | ATF6               | RP11    | DHX9   |         |
| MIR4426        | QARS                                | HNRNPU                                                                               | RNASEH1          | DDX1     | POTEE     | XRCC5              | TRIP12  | CIDCEP | FANCD2  |

Stable4\_20PerPair

| GO:ID                                                       | Count            | Size      | Term               |       |      |      |
|-------------------------------------------------------------|------------------|-----------|--------------------|-------|------|------|
| GO:0006397                                                  | 10.4408802685565 | 16        | 1.98795931077434   |       |      |      |
| GO:0008380                                                  | 10.9909608302645 | 14        | 1.60930039443637   |       |      |      |
| GO:0000377                                                  | 11.7933155969405 | 10        | 1.01640024911771   |       |      |      |
| GO:0000398                                                  | 11.7933155969405 | 10        | 1.01640024911771   |       |      |      |
| GO:0000375                                                  | 11.4929486140379 | 10        | 1.04131201992942   |       |      |      |
| GO:0070934                                                  | 136.914285714286 | 2         | 0.0249117708117085 |       |      |      |
| GO:0016556                                                  | 82.1371428571429 | 2         | 0.0348764791363919 |       |      |      |
| GO:0006734                                                  | 68.4428571428571 | 2         | 0.0398588332987337 |       |      |      |
| GO:0009060                                                  | 15.9866220735786 | 3         | 0.209258874818352  |       |      |      |
| GO:0006084                                                  | 12.9809782608696 | 3         | 0.254100062279427  |       |      |      |
| GO:0006281                                                  | 4.01067921440262 | 7         | 1.90824164417687   |       |      |      |
| GO:0006103                                                  | 24.1378151260504 | 2         | 0.0946647290844924 |       |      |      |
| GO:0031023                                                  | 10.0399719495091 | 3         | 0.323853020552211  |       |      |      |
| GO:0022613                                                  | 4.80291723202171 | 5         | 1.12102968652688   |       |      |      |
| GO:0006091                                                  | 3.57047323223095 | 7         | 2.13244758148225   |       |      |      |
| GO:0071843                                                  | 4.51109835438194 | 5         | 1.19078264479967   |       |      |      |
| GO:0019674                                                  | 17.8335403726708 | 2         | 0.124558854058543  |       |      |      |
| GO:0043489                                                  | 17.8335403726708 | 2         | 0.124558854058543  |       |      |      |
| GO:0048255                                                  | 17.8335403726708 | 2         | 0.124558854058543  |       |      |      |
| GO:0006099                                                  | 17.0892857142857 | 2         | 0.129541208220884  |       |      |      |
| GO:0009267                                                  | 7.87011557512383 | 3         | 0.40855304131202   |       |      |      |
| GO:0046356                                                  | 16.4045714285714 | 2         | 0.134523562383226  |       |      |      |
| GO:0006370                                                  | 14.6438775510204 | 2         | 0.149470624870251  |       |      |      |
| Tissue: Skin_Sun_Exposed_Lower_leg=>Thyroid                 | Type: asymmetric |           |                    |       |      |      |
| SourceGene: CBX8(ENSG00000141570.6)                         |                  |           |                    |       |      |      |
| TargetGeneSet: RP11 ACTA1 RAB10 CHAC2 XIRP2 MYL1 SUMF1 RFC1 |                  |           |                    |       |      |      |
| PPP1R3A FAM90A11P MYPN ANKRD2 SLN MYF6 MYBPC1 C12orf73      |                  |           |                    |       |      |      |
| ACA64 MYH2 TCAP PPP1R27 CKM TNNT1 KRTAP11-1 PVALB FAM45B    |                  |           |                    |       |      |      |
| GO:ID                                                       | Pvalue           | OddsRatio | ExpCount           | Count | Size | Term |

Stable4\_20PerPair

|            |                      |                                                       |                     |
|------------|----------------------|-------------------------------------------------------|---------------------|
| GO:0030049 | 6.82931318946151e-12 | 201.384615384615                                      | 0.0512767282541001  |
| 6          | 39                   | muscle filament sliding                               |                     |
| GO:0033275 | 6.82931318946151e-12 | 201.384615384615                                      | 0.0512767282541001  |
| 6          | 39                   | actin-myosin filament sliding                         |                     |
| GO:0070252 | 1.09550346103916e-11 | 184.564102564103                                      | 0.0552210919659539  |
| 6          | 42                   | actin-mediated cell contraction                       |                     |
| GO:0030048 | 9.28670025034424e-11 | 125.216255442671                                      | 0.0775724863331257  |
| 6          | 59                   | actin filament-based movement                         |                     |
| GO:0006936 | 3.21718692437347e-10 | 44.7099567099567                                      | 0.314234309044357   |
| 8          | 239                  | muscle contraction                                    |                     |
| GO:0003012 | 7.52608626815069e-10 | 39.9548978153629                                      | 0.349733582451041   |
| 8          | 266                  | muscle system process                                 |                     |
| GO:0030029 | 3.38449798682131e-08 | 24.0274442538593                                      | 0.567988374506954   |
| 8          | 432                  | actin filament-based process                          |                     |
| GO:0003009 | 1.84255948873129e-06 | 168.9375                                              | 0.0249809701750744  |
| 19         |                      | skeletal muscle contraction                           | 3                   |
| GO:0006941 | 2.44499268606635e-06 | 53.9380281690141                                      | 0.0986090927963463  |
| 4          | 75                   | striated muscle contraction                           |                     |
| GO:0050879 | 4.91524401869724e-06 | 117.464673913043                                      | 0.0341844855027334  |
| 3          | 26                   | multicellular organismal movement                     |                     |
| GO:0050881 | 4.91524401869724e-06 | 117.464673913043                                      | 0.0341844855027334  |
| 3          | 26                   | musculoskeletal movement                              |                     |
| GO:0003010 | 9.81137925112146e-06 | 848.823529411765                                      | 0.00525915161580513 |
| 2          | 4                    | voluntary skeletal muscle contraction                 |                     |
| GO:0014721 | 9.81137925112146e-06 | 848.823529411765                                      | 0.00525915161580513 |
| 2          | 4                    | twitch skeletal muscle contraction                    |                     |
| GO:0061061 | 9.83140057717353e-06 | 16.066806642489                                       | 0.537748252716075   |
| 409        |                      | muscle structure development                          | 6                   |
| GO:0030239 | 1.1237674975672e-05  | 87.1028225806452                                      | 0.0447027887343436  |
| 3          | 34                   | myofibril assembly                                    |                     |
| GO:0030240 | 1.63394737183147e-05 | 565.843137254902                                      | 0.00657393951975642 |
| 2          | 5                    | skeletal muscle thin filament assembly                |                     |
| GO:0014866 | 2.44899890051702e-05 | 424.352941176471                                      | 0.0078887274237077  |
| 2          | 6                    | skeletal myofibril assembly                           |                     |
| GO:0031032 | 2.64057118044168e-05 | 64.2410714285714                                      | 0.0591654556778078  |
| 3          | 45                   | actomyosin structure organization                     |                     |
| GO:0007517 | 3.58101005777371e-05 | 16.9391179290508                                      | 0.398380734897239   |
| 5          | 303                  | muscle organ development                              |                     |
| GO:0042692 | 0.000251743550383548 | 15.7688888888889                                      | 0.320808248564113   |
| 4          | 244                  | muscle cell differentiation                           |                     |
| GO:0055002 | 0.000350809358083889 | 25.8317307692308                                      | 0.140682305722787   |
| 3          | 107                  | striated muscle cell development                      |                     |
| GO:0045214 | 0.000372442933368624 | 84.7764705882353                                      | 0.0289253338869282  |
| 2          | 22                   | sarcomere organization                                |                     |
| GO:0010927 | 0.000527800161591498 | 22.3625                                               | 0.161718912186008   |
|            |                      | cellular component assembly involved in morphogenesis | 3 123               |
| GO:0055001 | 0.000606537671670912 | 21.2886904761905                                      | 0.169607639609716   |
| 3          | 129                  | muscle cell development                               |                     |
| GO:0051146 | 0.00132658647722655  | 16.1137048192771                                      | 0.222199155767767   |
| 3          | 169                  | striated muscle cell differentiation                  |                     |
| GO:0060048 | 0.00143215215855968  | 41.2941176470588                                      | 0.0565358798699052  |
| 2          | 43                   | cardiac muscle contraction                            |                     |
| GO:0030036 | 0.00145388941752792  | 9.72952380952381                                      | 0.511452494637049   |
| 4          | 389                  | actin cytoskeleton organization                       |                     |
| GO:0060415 | 0.00193222176422744  | 35.2549019607843                                      | 0.0657393951975642  |
| 2          | 50                   | muscle tissue morphogenesis                           |                     |
| GO:0001756 | 0.00216845350920103  | 33.1741637831603                                      | 0.069683758909418   |
| 2          | 53                   | somitogenesis                                         |                     |
| GO:0048644 | 0.00241769650587859  | 31.3246187363834                                      | 0.0736281226212719  |
| 2          | 56                   | muscle organ morphogenesis                            |                     |
| GO:0061053 | 0.00295483586424565  | 28.1803921568627                                      | 0.0815168500449796  |
| 2          | 62                   | somite development                                    |                     |
| GO:0030241 | 0.00393945224456549  | 400.833333333333                                      | 0.00394436371185385 |

Stable4\_20PerPair

|                                             |           |                                                 |                  |                    |         |                   |         |                     |         |      |
|---------------------------------------------|-----------|-------------------------------------------------|------------------|--------------------|---------|-------------------|---------|---------------------|---------|------|
| 1                                           | 3         | skeletal muscle myosin thick filament assembly  |                  |                    |         |                   |         |                     |         |      |
| GO:0031034                                  |           | 0.00393945224456549                             | 400.833333333333 |                    |         |                   |         | 0.00394436371185385 |         |      |
| 1                                           | 3         | myosin filament assembly                        |                  |                    |         |                   |         |                     |         |      |
| GO:0042396                                  |           | 0.00393945224456549                             | 400.833333333333 |                    |         |                   |         | 0.00394436371185385 |         |      |
| 1                                           | 3         | phosphagen biosynthetic process                 |                  |                    |         |                   |         |                     |         |      |
| GO:0048769                                  |           | 0.00393945224456549                             | 400.833333333333 |                    |         |                   |         | 0.00394436371185385 |         |      |
| 1                                           | 3         | sarcomerogenesis                                |                  |                    |         |                   |         |                     |         |      |
| GO:0071688                                  |           | 0.00393945224456549                             | 400.833333333333 |                    |         |                   |         | 0.00394436371185385 |         |      |
| 1                                           | 3         | striated muscle myosin thick filament assembly  |                  |                    |         |                   |         |                     |         |      |
| GO:0014706                                  |           | 0.00460462018587363                             | 10.2603764478764 |                    |         |                   |         | 0.344474430835236   |         |      |
| 3                                           | 262       | striated muscle tissue development              |                  |                    |         |                   |         |                     |         |      |
| GO:0035282                                  |           | 0.00463406501533718                             | 22.2229102167183 |                    |         |                   |         | 0.1025534565082 2   |         |      |
| 78                                          |           | segmentation                                    |                  |                    |         |                   |         |                     |         |      |
| GO:0048747                                  |           | 0.00475071458473899                             | 21.9327731092437 |                    |         |                   |         | 0.103868244412151   |         |      |
| 2                                           | 79        | muscle fiber development                        |                  |                    |         |                   |         |                     |         |      |
| GO:0060537                                  |           | 0.00516431657442708                             | 9.83472222222222 |                    |         |                   |         | 0.3589370977787 3   |         |      |
| 273                                         |           | muscle tissue development                       |                  |                    |         |                   |         |                     |         |      |
| GO:0031033                                  |           | 0.00524933253300364                             | 267.203703703704 |                    |         |                   |         | 0.00525915161580513 |         |      |
| 1                                           | 4         | myosin filament organization                    |                  |                    |         |                   |         |                     |         |      |
| GO:0001778                                  |           | 0.00655758079782431                             | 200.388888888889 |                    |         |                   |         | 0.00657393951975642 |         |      |
| 1                                           | 5         | plasma membrane repair                          |                  |                    |         |                   |         |                     |         |      |
| GO:0000244                                  |           | 0.00786419895958823                             | 160.3            | 0.0078887274237077 |         | 1                 | 6       |                     |         |      |
|                                             |           | assembly of spliceosomal tri-snRNP              |                  |                    |         |                   |         |                     |         |      |
| GO:0043353                                  |           | 0.00786419895958823                             | 160.3            | 0.0078887274237077 |         | 1                 | 6       |                     |         |      |
|                                             |           | enucleate erythrocyte differentiation           |                  |                    |         |                   |         |                     |         |      |
| GO:0048739                                  |           | 0.00916918893672691                             | 133.574074074074 |                    |         |                   |         | 0.00920351532765899 |         |      |
| 1                                           | 7         | cardiac muscle fiber development                |                  |                    |         |                   |         |                     |         |      |
| GO:0003015                                  |           | 0.00999174999097359                             | 14.7760577915377 |                    |         |                   |         | 0.152515396858349   |         |      |
| 2                                           | 116       | heart process                                   |                  |                    |         |                   |         |                     |         |      |
| GO:0060047                                  |           | 0.00999174999097359                             | 14.7760577915377 |                    |         |                   |         | 0.152515396858349   |         |      |
| 2                                           | 116       | heart contraction                               |                  |                    |         |                   |         |                     |         |      |
| Tissue: Skin_Sun_Exposed_Lower_leg=>Thyroid |           |                                                 | Type:            | cluster            |         |                   |         |                     |         |      |
| SourceGene:                                 |           | COR07(ENSG00000262246.1)                        |                  |                    |         |                   |         |                     |         |      |
| TargetGeneSet:                              |           | RP11                                            | MFI2             | TMSB4XP1           | DPH2    | KCND3             | RBBP5   | RRP15               |         |      |
| HEATR1                                      | DDIT3     | POLR1B                                          | DDX18            | HNRNPKP2           | USP37   | GIGYF2            | BRPF1   | MYNN                |         |      |
| OCIAD1-AS1                                  |           | ZNF131                                          | RIOK1            | PAK1IP1            | RPL7L1  | CDC5L             | CCNC    | ZNF680              | BAZ1B   |      |
| TRIM4                                       | TGS1      | TG                                              | FXN              | EXOSC2             | NGB     | BMS1              | SPTY2D1 | NAT10               | RPS3    |      |
| PA2G4                                       | RPL41     | UTP20                                           | SART3            | NUFIP1             | SUPT16H | RSL1D1            | SRCAP   | ZNF778              | NEURL4  | DHX8 |
| NOL11                                       | C17orf101 |                                                 | HMG20B           | ZNF121             | SYCE2   | ZNF576            | ZNF749  | ZSCAN22             | CSRP2BP | AHCY |
| TFIP11                                      | RP4       | GAPDHP1                                         | ATP6AP2          | TAF1               | UTP14A  | RAP2C             |         |                     |         |      |
| GOBPID                                      | Pvalue    | OddsRatio                                       | ExpCount         | Count              | Size    | Term              |         |                     |         |      |
| GO:0071843                                  |           | 8.31956408197553e-10                            | 16.2771512113617 |                    |         | 0.876548335755311 |         |                     |         |      |
| 11                                          | 239       | cellular component biogenesis at cellular level |                  |                    |         |                   |         |                     |         |      |
| GO:0022613                                  |           | 7.44588986654496e-09                            | 15.3412655489454 |                    |         | 0.825202408137845 |         |                     |         |      |
| 10                                          | 225       | ribonucleoprotein complex biogenesis            |                  |                    |         |                   |         |                     |         |      |
| GO:0042254                                  |           | 1.11473650659671e-06                            | 15.2774035517453 |                    |         | 0.546467372500173 |         |                     |         |      |
| 7                                           | 149       | ribosome biogenesis                             |                  |                    |         |                   |         |                     |         |      |
| GO:0006364                                  |           | 3.82252748338727e-05                            | 15.0452441077441 |                    |         | 0.381426890872604 |         |                     |         |      |
| 5                                           | 104       | rRNA processing                                 |                  |                    |         |                   |         |                     |         |      |
| GO:0016072                                  |           | 5.00360401007735e-05                            | 14.1795634920635 |                    |         | 0.403432288422946 |         |                     |         |      |
| 5                                           | 110       | rRNA metabolic process                          |                  |                    |         |                   |         |                     |         |      |
| GO:0016570                                  |           | 0.000369369644579804                            | 7.08035043804756 |                    |         | 0.9572347934399 6 |         |                     |         |      |
| 261                                         |           | histone modification                            |                  |                    |         |                   |         |                     |         |      |
| GO:0022618                                  |           | 0.000401071785835457                            | 12.8342677730433 |                    |         | 0.34841879454709  |         |                     |         |      |
| 4                                           | 95        | ribonucleoprotein complex assembly              |                  |                    |         |                   |         |                     |         |      |
| GO:0016569                                  |           | 0.000416853690713839                            | 6.9146490584495  | 0.979240190990243  |         |                   | 6       |                     |         |      |
| 267                                         |           | covalent chromatin modification                 |                  |                    |         |                   |         |                     |         |      |
| GO:0071826                                  |           | 0.000487377959773485                            | 12.1615646258503 |                    |         | 0.366756625839042 |         |                     |         |      |
| 4                                           | 100       | ribonucleoprotein complex subunit organization  |                  |                    |         |                   |         |                     |         |      |
| GO:0034660                                  |           | 0.000588487198610036                            | 6.4603065660032  | 1.04525638364127   |         |                   | 6       |                     |         |      |
| 285                                         |           | ncRNA metabolic process                         |                  |                    |         |                   |         |                     |         |      |
| GO:0016573                                  |           | 0.000651857061619797                            | 11.2197802197802 |                    |         | 0.396097155906166 |         |                     |         |      |
| 4                                           | 108       | histone acetylation                             |                  |                    |         |                   |         |                     |         |      |

Stable4\_20PerPair

|                                                        |                                                                                      |                  |                     |
|--------------------------------------------------------|--------------------------------------------------------------------------------------|------------------|---------------------|
| GO:0018393                                             | 0.000698443637537373                                                                 | 11.0065460146323 | 0.403432288422946   |
| 4 110                                                  | internal peptidyl-lysine acetylation                                                 |                  |                     |
| GO:0018394                                             | 0.000772680266855757                                                                 | 10.7013667852462 | 0.414434987198118   |
| 4 113                                                  | peptidyl-lysine acetylation                                                          |                  |                     |
| GO:0016568                                             | 0.000798470522773041                                                                 | 5.16578725200507 | 1.53671026226559    |
| 7 419                                                  | chromatin modification                                                               |                  |                     |
| GO:0034470                                             | 0.000808439723585181                                                                 | 7.58707264957265 | 0.733513251678085   |
| 5 200                                                  | ncRNA processing                                                                     |                  |                     |
| GO:0006475                                             | 0.000825168423407011                                                                 | 10.5070785070785 | 0.421770119714899   |
| 4 115                                                  | internal protein amino acid acetylation                                              |                  |                     |
| GO:0000377                                             | 0.00088366756234403                                                                  | 7.43247487437186 | 0.748183516711646   |
| 5 204                                                  | RNA splicing, via transesterification reactions with bulged adenosine as nucleophile |                  |                     |
| GO:0000398                                             | 0.00088366756234403                                                                  | 7.43247487437186 | 0.748183516711646   |
| 5 204                                                  | nuclear mRNA splicing, via spliceosome                                               |                  |                     |
| GO:0000375                                             | 0.000984912130114098                                                                 | 7.24775326797386 | 0.766521348003598   |
| 5 209                                                  | RNA splicing, via transesterification reactions                                      |                  |                     |
| GO:0006473                                             | 0.00122944119370842                                                                  | 9.39697169190257 | 0.469448481073974   |
| 4 128                                                  | protein acetylation                                                                  |                  |                     |
| GO:0006337                                             | 0.001532475065685                                                                    | 40.2913165266106 | 0.0586810601342468  |
| 2 16                                                   | nucleosome disassembly                                                               |                  |                     |
| GO:0031498                                             | 0.001532475065685                                                                    | 40.2913165266106 | 0.0586810601342468  |
| 2 16                                                   | chromatin disassembly                                                                |                  |                     |
| GO:0032986                                             | 0.001532475065685                                                                    | 40.2913165266106 | 0.0586810601342468  |
| 2 16                                                   | protein-DNA complex disassembly                                                      |                  |                     |
| GO:0018205                                             | 0.00175565072825971                                                                  | 8.49754208252644 | 0.51712684243305    |
| 4 141                                                  | peptidyl-lysine modification                                                         |                  |                     |
| GO:0043543                                             | 0.00189624101207078                                                                  | 8.31370262390671 | 0.528129541208221   |
| 4 144                                                  | protein acylation                                                                    |                  |                     |
| GO:0034623                                             | 0.00375623821690118                                                                  | 6.83217286914766 | 0.638156528959934   |
| 4 174                                                  | cellular macromolecular complex disassembly                                          |                  |                     |
| GO:0032984                                             | 0.00415486758017016                                                                  | 6.63463556851312 | 0.656494360251886   |
| 4 179                                                  | macromolecular complex disassembly                                                   |                  |                     |
| GO:0000387                                             | 0.00573319951906942                                                                  | 19.4306964164976 | 0.113694554010103   |
| 2 31                                                   | spliceosomal snRNP assembly                                                          |                  |                     |
| GO:0008380                                             | 0.00645433658226166                                                                  | 4.61215932914046 | 1.18462390146011    |
| 5 323                                                  | RNA splicing                                                                         |                  |                     |
| GO:0006354                                             | 0.00725196574203883                                                                  | 8.16742857142857 | 0.396097155906166   |
| 3 108                                                  | DNA-dependent transcription, elongation                                              |                  |                     |
| Tissue: Skin_Sun_Exposed_Lower_leg=>Thyroid            | Type: asymmetric                                                                     |                  |                     |
| SourceGene:                                            | DYNLL1(ENSG00000088986.6)                                                            |                  |                     |
| TargetGeneSet:                                         | RP4 SELL TNN1L XIRP2 GFRA3 RP1 MOG LMOD2 NRAP                                        |                  |                     |
| CSR3P3 ANGPTL5 MYBPC1 MYL2 MYH7 CTD MMP2 MYH1 TCAP CKM |                                                                                      |                  |                     |
| PVALB RPSAP8 FAM127C                                   |                                                                                      |                  |                     |
| GOBPID Pvalue                                          | OddsRatio                                                                            | ExpCount         | Count Size Term     |
| GO:0030049                                             | 6.63055833692767e-10                                                                 | 176.470588235294 | 0.0458791779115632  |
| 5 39                                                   | muscle filament sliding                                                              |                  |                     |
| GO:0033275                                             | 6.63055833692767e-10                                                                 | 176.470588235294 | 0.0458791779115632  |
| 5 39                                                   | actin-myosin filament sliding                                                        |                  |                     |
| GO:0070252                                             | 9.77614220520049e-10                                                                 | 162.128378378378 | 0.0494083454432219  |
| 5 42                                                   | actin-mediated cell contraction                                                      |                  |                     |
| GO:0030048                                             | 5.68604279134456e-09                                                                 | 110.956790123457 | 0.0694069614559546  |
| 5 59                                                   | actin filament-based movement                                                        |                  |                     |
| GO:0048738                                             | 1.6766067820844e-07                                                                  | 54.2575757575758 | 0.135284755380251   |
| 5 115                                                  | cardiac muscle tissue development                                                    |                  |                     |
| GO:0055008                                             | 1.89547834193003e-07                                                                 | 108.015009380863 | 0.0529375129748806  |
| 4 45                                                   | cardiac muscle tissue morphogenesis                                                  |                  |                     |
| GO:0006936                                             | 2.04235339756834e-07                                                                 | 33.244635193133  | 0.281157013355477 6 |
| 239                                                    | muscle contraction                                                                   |                  |                     |
| GO:0060415                                             | 2.91927812134081e-07                                                                 | 96.2408026755853 | 0.0588194588609785  |
| 4 50                                                   | muscle tissue morphogenesis                                                          |                  |                     |
| GO:0003012                                             | 3.83791962639148e-07                                                                 | 29.7356643356643 | 0.312919521140405   |
| 6 266                                                  | muscle system process                                                                |                  |                     |

Stable4\_20PerPair

|            |                      |                                                 |                    |      |
|------------|----------------------|-------------------------------------------------|--------------------|------|
| GO:0048644 | 4.63566068315803e-07 | 85.1005917159763                                | 0.0658777939242959 |      |
| 4          | 56                   | muscle organ morphogenesis                      |                    |      |
| GO:0006941 | 1.51316902074374e-06 | 62.2448537378115                                | 0.0882291882914677 |      |
| 4          | 75                   | striated muscle contraction                     |                    |      |
| GO:0007507 | 1.66962570045951e-06 | 22.8863636363636                                | 0.402325098609093  |      |
| 6          | 342                  | heart development                               |                    |      |
| GO:0030029 | 6.44751475380701e-06 | 17.9359795134443                                | 0.508200124558854  |      |
| 6          | 432                  | actin filament-based process                    |                    |      |
| GO:0055010 | 7.21868328547381e-06 | 102.885714285714                                | 0.0388208428482458 |      |
| 3          | 33                   | ventricular cardiac muscle tissue morphogenesis |                    |      |
| GO:0003015 | 8.65413335701117e-06 | 39.3461538461538                                | 0.13646114455747   |      |
| 4          | 116                  | heart process                                   |                    |      |
| GO:0060047 | 8.65413335701117e-06 | 39.3461538461538                                | 0.13646114455747   |      |
| 4          | 116                  | heart contraction                               |                    |      |
| GO:0003229 | 9.4261519298055e-06  | 93.512987012987                                 | 0.0423500103799045 | 3    |
| 36         |                      | ventricular cardiac muscle tissue development   |                    |      |
| GO:0014706 | 9.76150598372339e-06 | 22.9847600518807                                | 0.308213964431527  |      |
| 5          | 262                  | striated muscle tissue development              |                    |      |
| GO:0060537 | 1.1916725202437e-05  | 22.0242537313433                                | 0.321154245380943  |      |
| 5          | 273                  | muscle tissue development                       |                    |      |
| GO:0007517 | 1.97254232303307e-05 | 19.7651006711409                                | 0.35644592069753   |      |
| 5          | 303                  | muscle organ development                        |                    |      |
| GO:0003007 | 2.85819821851923e-05 | 28.7199597787833                                | 0.184693100823472  |      |
| 4          | 157                  | heart morphogenesis                             |                    |      |
| GO:0003208 | 3.05467779594253e-05 | 61.6457142857143                                | 0.0623486263926372 |      |
| 3          | 53                   | cardiac ventricle morphogenesis                 |                    |      |
| GO:0009582 | 6.75297557433346e-05 | 46.6493506493507                                | 0.0811708532281503 |      |
| 3          | 69                   | detection of abiotic stimulus                   |                    |      |
| GO:0007603 | 7.11967467526906e-05 | 213.703703703704                                | 0.0129402809494153 |      |
| 2          | 11                   | phototransduction, visible light                |                    |      |
| GO:0061061 | 8.27676600816249e-05 | 14.4698844884488                                | 0.481143173482804  |      |
| 5          | 409                  | muscle structure development                    |                    |      |
| GO:0003231 | 9.01483592865506e-05 | 42.1555772994129                                | 0.0894055774686873 |      |
| 3          | 76                   | cardiac ventricle development                   |                    |      |
| GO:0007512 | 0.000100830265848504 | 174.824242424242                                | 0.0152930593038544 |      |
| 2          | 13                   | adult heart development                         |                    |      |
| GO:0003206 | 0.00010901190307642  | 39.4395604395604                                | 0.0952875233547851 |      |
| 3          | 81                   | cardiac chamber morphogenesis                   |                    |      |
| GO:0055003 | 0.000117553927184637 | 160.244444444444                                | 0.016469448481074  |      |
| 2          | 14                   | cardiac myofibril assembly                      |                    |      |
| GO:0009581 | 0.000130283379331782 | 37.0507745266781                                | 0.101169469240883  |      |
| 3          | 86                   | detection of external stimulus                  |                    |      |
| GO:0003205 | 0.000164358884169156 | 34.152380952381                                 | 0.10940419348142   | 3    |
| 93         |                      | cardiac chamber development                     |                    |      |
| GO:0003009 | 0.000220135062408993 | 113.074509803922                                | 0.0223513943671718 |      |
| 2          | 19                   | skeletal muscle contraction                     |                    |      |
| GO:0009584 | 0.00024442533295198  | 106.785185185185                                | 0.0235277835443914 |      |
| 2          | 20                   | detection of visible light                      |                    |      |
| GO:0008015 | 0.000363425273176549 | 14.5459223051196                                | 0.35644592069753   |      |
| 4          | 303                  | blood circulation                               |                    |      |
| GO:0003013 | 0.000368003727025375 | 14.4964102564103                                | 0.357622309874749  |      |
| 4          | 304                  | circulatory system process                      |                    |      |
| GO:0050879 | 0.000416364046374626 | 80.0555555555556                                | 0.0305861186077088 |      |
| 2          | 26                   | multicellular organismal movement               |                    |      |
| GO:0050881 | 0.000416364046374626 | 80.0555555555556                                | 0.0305861186077088 |      |
| 2          | 26                   | musculoskeletal movement                        |                    |      |
| GO:0055006 | 0.000555747467346677 | 68.6                                            | 0.0352916753165871 | 2 30 |
|            |                      | cardiac cell development                        |                    |      |
| GO:0055013 | 0.000555747467346677 | 68.6                                            | 0.0352916753165871 | 2 30 |
|            |                      | cardiac muscle cell development                 |                    |      |
| GO:0071482 | 0.000632803923949525 | 64.0177777777778                                | 0.0376444536710262 |      |
| 2          | 32                   | cellular response to light stimulus             |                    |      |
| GO:0007602 | 0.000673164262056883 | 61.9483870967742                                | 0.0388208428482458 |      |

STable4\_20PerPair

|            |     |                                                                    |                   |                     |   |                     |  |
|------------|-----|--------------------------------------------------------------------|-------------------|---------------------|---|---------------------|--|
| 2          | 33  | phototransduction                                                  |                   |                     |   |                     |  |
| GO:0030239 |     | 0.000714742559025276                                               | 60.00833333333333 |                     |   | 0.0399972320254654  |  |
| 2          | 34  | myofibril assembly                                                 |                   |                     |   |                     |  |
| GO:0006942 |     | 0.000893183771772659                                               | 53.3259259259259  |                     |   | 0.0447027887343436  |  |
| 2          | 38  | regulation of striated muscle contraction                          |                   |                     |   |                     |  |
| GO:0009583 |     | 0.000989645204184707                                               | 50.5122807017544  |                     |   | 0.0470555670887828  |  |
| 2          | 40  | detection of light stimulus                                        |                   |                     |   |                     |  |
| GO:0048729 |     | 0.00107264463754218                                                | 10.7953846153846  |                     |   | 0.475261227596706   |  |
| 4          | 404 | tissue morphogenesis                                               |                   |                     |   |                     |  |
| GO:0044057 |     | 0.00120661265491822                                                | 10.4458930899609  |                     |   | 0.490554286900561   |  |
| 4          | 417 | regulation of system process                                       |                   |                     |   |                     |  |
| GO:0051606 |     | 0.00124909903274545                                                | 16.6873536299766  |                     |   | 0.21880838696284    |  |
| 3          | 186 | detection of stimulus                                              |                   |                     |   |                     |  |
| GO:0031032 |     | 0.00125175363671356                                                | 44.6232558139535  |                     |   | 0.0529375129748806  |  |
| 2          | 45  | actomyosin structure organization                                  |                   |                     |   |                     |  |
| GO:0055007 |     | 0.00193242469401933                                                | 35.5061728395062  |                     |   | 0.0658777939242959  |  |
| 2          | 56  | cardiac muscle cell differentiation                                |                   |                     |   |                     |  |
| GO:0071478 |     | 0.00207135493513362                                                | 34.23333333333333 |                     |   | 0.068230572278735   |  |
| 2          | 58  | cellular response to radiation                                     |                   |                     |   |                     |  |
| GO:0016056 |     | 0.00352526115515339                                                | 451               | 0.00352916753165871 | 1 | 3                   |  |
|            |     | rhodopsin mediated signaling pathway                               |                   |                     |   |                     |  |
| GO:0030241 |     | 0.00352526115515339                                                | 451               | 0.00352916753165871 | 1 | 3                   |  |
|            |     | skeletal muscle myosin thick filament assembly                     |                   |                     |   |                     |  |
| GO:0031034 |     | 0.00352526115515339                                                | 451               | 0.00352916753165871 | 1 | 3                   |  |
|            |     | myosin filament assembly                                           |                   |                     |   |                     |  |
| GO:0034124 |     | 0.00352526115515339                                                | 451               | 0.00352916753165871 | 1 | 3                   |  |
|            |     | regulation of MyD88-dependent toll-like receptor signaling pathway |                   |                     |   |                     |  |
| GO:0035845 |     | 0.00352526115515339                                                | 451               | 0.00352916753165871 | 1 | 3                   |  |
|            |     | photoreceptor cell outer segment organization                      |                   |                     |   |                     |  |
| GO:0042396 |     | 0.00352526115515339                                                | 451               | 0.00352916753165871 | 1 | 3                   |  |
|            |     | phosphagen biosynthetic process                                    |                   |                     |   |                     |  |
| GO:0048769 |     | 0.00352526115515339                                                | 451               | 0.00352916753165871 | 1 | 3                   |  |
|            |     | sarcomerogenesis                                                   |                   |                     |   |                     |  |
| GO:0071688 |     | 0.00352526115515339                                                | 451               | 0.00352916753165871 | 1 | 3                   |  |
|            |     | striated muscle myosin thick filament assembly                     |                   |                     |   |                     |  |
| GO:0035051 |     | 0.00352717337339985                                                | 25.8738738738739  |                     |   | 0.0894055774686873  |  |
| 2          | 76  | cardiac cell differentiation                                       |                   |                     |   |                     |  |
| GO:0003010 |     | 0.00469774665905387                                                | 300.6458333333333 |                     |   | 0.00470555670887828 |  |
| 1          | 4   | voluntary skeletal muscle contraction                              |                   |                     |   |                     |  |
| GO:0014721 |     | 0.00469774665905387                                                | 300.6458333333333 |                     |   | 0.00470555670887828 |  |
| 1          | 4   | twitch skeletal muscle contraction                                 |                   |                     |   |                     |  |
| GO:0031033 |     | 0.00469774665905387                                                | 300.6458333333333 |                     |   | 0.00470555670887828 |  |
| 1          | 4   | myosin filament organization                                       |                   |                     |   |                     |  |
| GO:0006937 |     | 0.00480315999875744                                                | 21.9877394636015  |                     |   | 0.104698636772542   |  |
| 2          | 89  | regulation of muscle contraction                                   |                   |                     |   |                     |  |
| GO:0060041 |     | 0.00534277161637755                                                | 20.7855072463768  |                     |   | 0.11058058265864    |  |
| 2          | 94  | retina development in camera-type eye                              |                   |                     |   |                     |  |
| GO:0008016 |     | 0.00556610375852272                                                | 20.3404255319149  |                     |   | 0.112933361013079   |  |
| 2          | 96  | regulation of heart contraction                                    |                   |                     |   |                     |  |
| GO:0001955 |     | 0.00586893363952024                                                | 225.46875         | 0.00588194588609785 | 1 |                     |  |
| 5          |     | blood vessel maturation                                            |                   |                     |   |                     |  |
| GO:0030240 |     | 0.00586893363952024                                                | 225.46875         | 0.00588194588609785 | 1 |                     |  |
| 5          |     | skeletal muscle thin filament assembly                             |                   |                     |   |                     |  |
| GO:0090257 |     | 0.00674614320171622                                                | 18.3717948717949  |                     |   | 0.124697252785274   |  |
| 2          | 106 | regulation of muscle system process                                |                   |                     |   |                     |  |
| GO:0055002 |     | 0.00686990117416381                                                | 18.1955555555556  |                     |   | 0.125873641962494   |  |
| 2          | 107 | striated muscle cell development                                   |                   |                     |   |                     |  |
| GO:0001957 |     | 0.00703882344487339                                                | 180.3625          | 0.00705833506331742 | 1 |                     |  |
| 6          |     | intramembranous ossification                                       |                   |                     |   |                     |  |
| GO:0009586 |     | 0.00703882344487339                                                | 180.3625          | 0.00705833506331742 | 1 |                     |  |
| 6          |     | rhodopsin mediated phototransduction                               |                   |                     |   |                     |  |
| GO:0014866 |     | 0.00703882344487339                                                | 180.3625          | 0.00705833506331742 | 1 |                     |  |
| 6          |     | skeletal myofibril assembly                                        |                   |                     |   |                     |  |

Stable4\_20PerPair

|                                                              |                                                           |                  |                      |                  |                                                 |
|--------------------------------------------------------------|-----------------------------------------------------------|------------------|----------------------|------------------|-------------------------------------------------|
| GO:0036072                                                   | 0.00703882344487339                                       | 180.3625         | 0.00705833506331742  | 1                |                                                 |
| 6                                                            | direct ossification                                       |                  |                      |                  |                                                 |
| GO:0043353                                                   | 0.00703882344487339                                       | 180.3625         | 0.00705833506331742  | 1                |                                                 |
| 6                                                            | enucleate erythrocyte differentiation                     |                  |                      |                  |                                                 |
| GO:0046548                                                   | 0.00703882344487339                                       | 180.3625         | 0.00705833506331742  | 1                |                                                 |
| 6                                                            | retinal rod cell development                              |                  |                      |                  |                                                 |
| GO:0000302                                                   | 0.00750419816453199                                       | 17.3624242424242 | 0.131755587848592    |                  |                                                 |
| 2                                                            | 112 response to reactive oxygen species                   |                  |                      |                  |                                                 |
| GO:0048739                                                   | 0.00820741742212772                                       | 150.291666666667 | 0.00823472424053699  |                  |                                                 |
| 1                                                            | 7 cardiac muscle fiber development                        |                  |                      |                  |                                                 |
| GO:0010927                                                   | 0.00898948094198444                                       | 15.7719008264463 | 0.144695868798007    |                  |                                                 |
| 2                                                            | 123 cellular component assembly involved in morphogenesis |                  |                      |                  |                                                 |
| GO:0042670                                                   | 0.00937471691699199                                       | 128.8125         | 0.00941111341775656  | 1                |                                                 |
| 8                                                            | retinal cone cell differentiation                         |                  |                      |                  |                                                 |
| GO:0046549                                                   | 0.00937471691699199                                       | 128.8125         | 0.00941111341775656  | 1                |                                                 |
| 8                                                            | retinal cone cell development                             |                  |                      |                  |                                                 |
| GO:0055001                                                   | 0.00985084345743121                                       | 15.0204724409449 | 0.151754203861324    |                  |                                                 |
| 2                                                            | 129 muscle cell development                               |                  |                      |                  |                                                 |
| GO:0030036                                                   | 0.00994051330598178                                       | 7.79866765358993 | 0.457615389938413    |                  |                                                 |
| 3                                                            | 389 actin cytoskeleton organization                       |                  |                      |                  |                                                 |
| Tissue: Skin_Sun_Exposed_Lower_leg=>Thyroid Type: asymmetric |                                                           |                  |                      |                  |                                                 |
| SourceGene: ENSG00000237411.1                                |                                                           |                  |                      |                  |                                                 |
| TargetGeneSet: RP4 NSRP1P1 TNNI1 ACTA1 LBH XIRP2 TLK1 RP11   |                                                           |                  |                      |                  |                                                 |
| SH3PXD2B GCNT6 TRDN NRAP RNU2-2 MYBPC1 MYH7 CTD COX16 MYH2   |                                                           |                  |                      |                  |                                                 |
| MYH1 CKM TNNT1 PRMT2 PVALB                                   |                                                           |                  |                      |                  |                                                 |
| GOBPID                                                       | Pvalue                                                    | OddsRatio        | ExpCount             | Count Size Term  |                                                 |
| GO:0030049                                                   | 6                                                         | 39               | 6.82931318946151e-12 | 201.384615384615 | 0.0512767282541001                              |
| 6                                                            | 39                                                        |                  |                      |                  | muscle filament sliding                         |
| GO:0033275                                                   | 6                                                         | 39               | 6.82931318946151e-12 | 201.384615384615 | 0.0512767282541001                              |
| 6                                                            | 39                                                        |                  |                      |                  | actin-myosin filament sliding                   |
| GO:0070252                                                   | 6                                                         | 42               | 1.09550346103916e-11 | 184.564102564103 | 0.0552210919659539                              |
| 6                                                            | 42                                                        |                  |                      |                  | actin-mediated cell contraction                 |
| GO:0030048                                                   | 6                                                         | 59               | 9.28670025034424e-11 | 125.216255442671 | 0.0775724863331257                              |
| 6                                                            | 59                                                        |                  |                      |                  | actin filament-based movement                   |
| GO:0006936                                                   | 8                                                         | 239              | 3.21718692437347e-10 | 44.7099567099567 | 0.314234309044357                               |
| 8                                                            | 239                                                       |                  |                      |                  | muscle contraction                              |
| GO:0003012                                                   | 8                                                         | 266              | 7.52608626815069e-10 | 39.9548978153629 | 0.349733582451041                               |
| 8                                                            | 266                                                       |                  |                      |                  | muscle system process                           |
| GO:0030029                                                   | 7                                                         | 432              | 7.50211871241557e-07 | 19.2252941176471 | 0.567988374506954                               |
| 7                                                            | 432                                                       |                  |                      |                  | actin filament-based process                    |
| GO:0003010                                                   | 2                                                         | 4                | 9.81137925112146e-06 | 848.823529411765 | 0.00525915161580513                             |
| 2                                                            | 4                                                         |                  |                      |                  | voluntary skeletal muscle contraction           |
| GO:0014721                                                   | 2                                                         | 4                | 9.81137925112146e-06 | 848.823529411765 | 0.00525915161580513                             |
| 2                                                            | 4                                                         |                  |                      |                  | twitch skeletal muscle contraction              |
| GO:0006941                                                   | 3                                                         | 75               | 0.00012256166736417  | 37.3958333333333 | 0.0986090927963463                              |
| 3                                                            | 75                                                        |                  |                      |                  | striated muscle contraction                     |
| GO:0003009                                                   | 19                                                        |                  | 0.000276353744574814 | 99.757785467128  | 0.0249809701750744 2                            |
| 19                                                           |                                                           |                  |                      |                  | skeletal muscle contraction                     |
| GO:0050879                                                   | 2                                                         | 26               | 0.0005223593393242   | 70.6274509803922 | 0.0341844855027334                              |
| 2                                                            | 26                                                        |                  |                      |                  | multicellular organismal movement               |
| GO:0050881                                                   | 2                                                         | 26               | 0.0005223593393242   | 70.6274509803922 | 0.0341844855027334                              |
| 2                                                            | 26                                                        |                  |                      |                  | musculoskeletal movement                        |
| GO:0055010                                                   | 2                                                         | 33               | 0.000843990329769391 | 54.6527514231499 | 0.0433880008303924                              |
| 2                                                            | 33                                                        |                  |                      |                  | ventricular cardiac muscle tissue morphogenesis |
| GO:0007507                                                   | 4                                                         | 342              | 0.000901575672369832 | 11.1195266272189 | 0.449657463151339                               |
| 4                                                            | 342                                                       |                  |                      |                  | heart development                               |
| GO:0003229                                                   | 2                                                         | 36               | 0.00100466965926752  | 49.8200692041522 | 0.0473323645422462                              |
| 2                                                            | 36                                                        |                  |                      |                  | ventricular cardiac muscle tissue development   |
| GO:0055008                                                   | 2                                                         | 45               | 0.00156767622957267  | 39.3679890560876 | 0.0591654556778078                              |
| 2                                                            | 45                                                        |                  |                      |                  | cardiac muscle tissue morphogenesis             |
| GO:0060415                                                   | 2                                                         | 50               | 0.00193222176422744  | 35.2549019607843 | 0.0657393951975642                              |
| 2                                                            | 50                                                        |                  |                      |                  | muscle tissue morphogenesis                     |
| GO:0003208                                                   |                                                           |                  | 0.00216845350920103  | 33.1741637831603 | 0.069683758909418                               |



Stable4\_20PerPair

|            |     |                                                                             |                  |                    |  |   |     |                     |
|------------|-----|-----------------------------------------------------------------------------|------------------|--------------------|--|---|-----|---------------------|
| 2          | 53  | cardiac ventricle morphogenesis                                             |                  |                    |  |   |     |                     |
| GO:0048644 |     | 0.00241769650587859                                                         | 31.3246187363834 |                    |  |   |     | 0.0736281226212719  |
| 2          | 56  | muscle organ morphogenesis                                                  |                  |                    |  |   |     |                     |
| GO:0016056 |     | 0.00393945224456549                                                         | 400.833333333333 |                    |  |   |     | 0.00394436371185385 |
| 1          | 3   | rhodopsin mediated signaling pathway                                        |                  |                    |  |   |     |                     |
| GO:0042396 |     | 0.00393945224456549                                                         | 400.833333333333 |                    |  |   |     | 0.00394436371185385 |
| 1          | 3   | phosphagen biosynthetic process                                             |                  |                    |  |   |     |                     |
| GO:0003231 |     | 0.00440484670302872                                                         | 22.8267090620032 |                    |  |   |     | 0.0999238807002976  |
| 2          | 76  | cardiac ventricle development                                               |                  |                    |  |   |     |                     |
| GO:0014706 |     | 0.00460462018587363                                                         | 10.2603764478764 |                    |  |   |     | 0.344474430835236   |
| 3          | 262 | striated muscle tissue development                                          |                  |                    |  |   |     |                     |
| GO:0003206 |     | 0.00498807761938354                                                         | 21.3745346239762 |                    |  |   |     | 0.106497820220054   |
| 2          | 81  | cardiac chamber morphogenesis                                               |                  |                    |  |   |     |                     |
| GO:0060537 |     | 0.00516431657442708                                                         | 9.8347222222222  |                    |  |   |     | 0.3589370977787 3   |
| 273        |     | muscle tissue development                                                   |                  |                    |  |   |     |                     |
| GO:0001672 |     | 0.00524933253300364                                                         | 267.203703703704 |                    |  |   |     | 0.00525915161580513 |
| 1          | 4   | regulation of chromatin assembly or disassembly                             |                  |                    |  |   |     |                     |
| GO:0006937 |     | 0.00599122113800982                                                         | 19.3982420554429 |                    |  |   |     | 0.117016123451664   |
| 2          | 89  | regulation of muscle contraction                                            |                  |                    |  |   |     |                     |
| GO:0003205 |     | 0.00652463296512004                                                         | 18.5404007756949 |                    |  |   |     | 0.122275275067469   |
| 2          | 93  | cardiac chamber development                                                 |                  |                    |  |   |     |                     |
| GO:0001778 |     | 0.00655758079782431                                                         | 200.388888888889 |                    |  |   |     | 0.00657393951975642 |
| 1          | 5   | plasma membrane repair                                                      |                  |                    |  |   |     |                     |
| GO:0030240 |     | 0.00655758079782431                                                         | 200.388888888889 |                    |  |   |     | 0.00657393951975642 |
| 1          | 5   | skeletal muscle thin filament assembly                                      |                  |                    |  |   |     |                     |
| GO:0060315 |     | 0.00655758079782431                                                         | 200.388888888889 |                    |  |   |     | 0.00657393951975642 |
| 1          | 5   | negative regulation of ryanodine-sensitive calcium-release channel activity |                  |                    |  |   |     |                     |
| GO:0071800 |     | 0.00655758079782431                                                         | 200.388888888889 |                    |  |   |     | 0.00657393951975642 |
| 1          | 5   | podosome assembly                                                           |                  |                    |  |   |     |                     |
| GO:0007517 |     | 0.00689463365614857                                                         | 8.8325           | 0.398380734897239  |  | 3 | 303 |                     |
|            |     | muscle organ development                                                    |                  |                    |  |   |     |                     |
| GO:0000244 |     | 0.00786419895958823                                                         | 160.3            | 0.0078887274237077 |  | 1 | 6   |                     |
|            |     | assembly of spliceosomal tri-snRNP                                          |                  |                    |  |   |     |                     |
| GO:0009586 |     | 0.00786419895958823                                                         | 160.3            | 0.0078887274237077 |  | 1 | 6   |                     |
|            |     | rhodopsin mediated phototransduction                                        |                  |                    |  |   |     |                     |
| GO:0014866 |     | 0.00786419895958823                                                         | 160.3            | 0.0078887274237077 |  | 1 | 6   |                     |
|            |     | skeletal myofibril assembly                                                 |                  |                    |  |   |     |                     |
| GO:0043353 |     | 0.00786419895958823                                                         | 160.3            | 0.0078887274237077 |  | 1 | 6   |                     |
|            |     | enucleate erythrocyte differentiation                                       |                  |                    |  |   |     |                     |
| GO:0090257 |     | 0.00840177241788033                                                         | 16.2081447963801 |                    |  |   |     | 0.139367517818836   |
| 2          | 106 | regulation of muscle system process                                         |                  |                    |  |   |     |                     |
| GO:1901020 |     | 0.00916918893672691                                                         | 133.574074074074 |                    |  |   |     | 0.00920351532765899 |
| 1          | 7   | negative regulation of calcium ion transmembrane transporter activity       |                  |                    |  |   |     |                     |
| GO:0000302 |     | 0.00934076689784703                                                         | 15.3176470588235 |                    |  |   |     | 0.147256245242544   |
| 2          | 112 | response to reactive oxygen species                                         |                  |                    |  |   |     |                     |
| GO:0048738 |     | 0.00982714459386267                                                         | 14.9078604893285 |                    |  |   |     | 0.151200608954398   |
| 2          | 115 | cardiac muscle tissue development                                           |                  |                    |  |   |     |                     |
|            |     | Tissue: Skin_Sun_Exposed_Lower_leg=>Thyroid                                 |                  |                    |  |   |     | Type: asymmetric    |
|            |     | SourceGene: MADD(ENSG00000110514.13)                                        |                  |                    |  |   |     |                     |
|            |     | TargetGeneSet: TNFRSF14 RPL11 RP4 RPL5 RP11 RPL32 PLCL2-AS1                 |                  |                    |  |   |     |                     |
|            |     | RPL37 EEF1A1P19 BTF3 RP1 RPL10A SAMD3 TOMM7 EIF4BP6 RPL30                   |                  |                    |  |   |     |                     |
|            |     | BBIP1 FAU RPS25 KRT4 ATP5G2 RPL41 RPL14P1 NAP1L1 RPL7AP6 UBE2I              |                  |                    |  |   |     |                     |
|            |     | TP53I13 TBC1D3 RPL17 CASC3 STAT5B CCDC102B POLR2I ISOC2 ZNF8                |                  |                    |  |   |     |                     |
|            |     | RPS21 EIF3D                                                                 |                  |                    |  |   |     |                     |
|            |     | GOBPID Pvalue OddsRatio ExpCount Count Size Term                            |                  |                    |  |   |     |                     |
| GO:0000184 |     | 1.50047049188817e-18                                                        | 100.345794392523 |                    |  |   |     | 0.230572278735036   |
| 12         | 119 | nuclear-transcribed mRNA catabolic process, nonsense-mediated decay         |                  |                    |  |   |     |                     |
| GO:0006415 |     | 6.50644801972714e-18                                                        | 116.009558823529 |                    |  |   |     | 0.176319977856204   |
| 11         | 91  | translational termination                                                   |                  |                    |  |   |     |                     |
| GO:0019080 |     | 2.865849493093e-17                                                          | 77.0719424460432 |                    |  |   |     | 0.292574908310844   |
| 12         | 151 | viral genome expression                                                     |                  |                    |  |   |     |                     |

Stable4\_20PerPair

|            |                      |                                                                |                    |
|------------|----------------------|----------------------------------------------------------------|--------------------|
| GO:0019083 | 2.865849493093e-17   | 77.0719424460432                                               | 0.292574908310844  |
| 12         | 151                  | viral transcription                                            |                    |
| GO:0006413 | 3.10828516241801e-17 | 76.5160714285714                                               | 0.294512490485088  |
| 12         | 152                  | translational initiation                                       |                    |
| GO:0006414 | 3.37370061889609e-17 | 98.6351689612015                                               | 0.20344612829562   |
| 11         | 105                  | translational elongation                                       |                    |
| GO:0006614 | 3.37370061889609e-17 | 98.6351689612015                                               | 0.20344612829562   |
| 11         | 105                  | SRP-dependent cotranslational protein targeting to membrane    |                    |
| GO:0006613 | 3.76025564035194e-17 | 97.590092879257                                                | 0.205383710469864  |
| 106        |                      | cotranslational protein targeting to membrane                  | 11                 |
| GO:0045047 | 3.76025564035194e-17 | 97.590092879257                                                | 0.205383710469864  |
| 106        |                      | protein targeting to ER                                        | 11                 |
| GO:0072599 | 3.76025564035194e-17 | 97.590092879257                                                | 0.205383710469864  |
| 106        |                      | establishment of protein localization to endoplasmic reticulum | 11                 |
| GO:0000956 | 1.14116022391456e-16 | 68.1496815286624                                               | 0.327451387447236  |
| 12         | 169                  | nuclear-transcribed mRNA catabolic process                     |                    |
| GO:0070972 | 1.27749015390823e-16 | 86.5728422210006                                               | 0.228634696560792  |
| 11         | 118                  | protein localization to endoplasmic reticulum                  |                    |
| GO:0006402 | 2.15121092431852e-16 | 64.414156626506                                                | 0.344889627015431  |
| 178        |                      | mRNA catabolic process                                         | 12                 |
| GO:0072594 | 1.12958423475647e-15 | 55.58984375                                                    | 0.395266763545775  |
| 204        |                      | establishment of protein localization to organelle             | 12                 |
| GO:0006401 | 1.19857635529966e-15 | 55.2979274611399                                               | 0.397204345720019  |
| 12         | 205                  | RNA catabolic process                                          |                    |
| GO:0006612 | 2.39677087220734e-15 | 65.0749792874896                                               | 0.296450072659332  |
| 11         | 153                  | protein targeting to membrane                                  |                    |
| GO:0043624 | 2.39677087220734e-15 | 65.0749792874896                                               | 0.296450072659332  |
| 11         | 153                  | cellular protein complex disassembly                           |                    |
| GO:0043241 | 3.436052031534e-15   | 62.8395358143257                                               | 0.306137983530551  |
| 11         | 158                  | protein complex disassembly                                    |                    |
| GO:0019058 | 5.0767250836969e-15  | 48.6438356164384                                               | 0.447581482250363  |
| 12         | 231                  | viral infectious cycle                                         |                    |
| GO:0034623 | 1.0088421326474e-14  | 56.6077228437387                                               | 0.337139298318455  |
| 11         | 174                  | cellular macromolecular complex disassembly                    |                    |
| GO:0032984 | 1.38290377756684e-14 | 54.9037114845938                                               | 0.346827209189675  |
| 11         | 179                  | macromolecular complex disassembly                             |                    |
| GO:0022415 | 2.10447537193709e-14 | 42.8679435483871                                               | 0.503771365303439  |
| 12         | 260                  | viral reproductive process                                     |                    |
| GO:0071845 | 2.22343453693889e-12 | 33.5380305968541                                               | 0.550273337485295  |
| 11         | 284                  | cellular component disassembly at cellular level               |                    |
| GO:0022411 | 2.58900225122003e-12 | 33.0443830961988                                               | 0.558023666182271  |
| 11         | 288                  | cellular component disassembly                                 |                    |
| GO:0016032 | 1.42814313194492e-11 | 23.8906605922551                                               | 0.873849560584043  |
| 12         | 451                  | viral reproduction                                             |                    |
| GO:0033365 | 2.48859198781389e-11 | 22.7147505422993                                               | 0.916476368417411  |
| 12         | 473                  | protein localization to organelle                              |                    |
| GO:0006605 | 2.55054753927791e-11 | 22.663961038961                                                | 0.918413950591655  |
| 474        |                      | protein targeting                                              | 12                 |
| GO:0022613 | 3.76983542061772e-06 | 17.6886674968867                                               | 0.435955989204899  |
| 6          | 225                  | ribonucleoprotein complex biogenesis                           |                    |
| GO:0071843 | 5.33749530884311e-06 | 16.6094420600858                                               | 0.463082139644315  |
| 6          | 239                  | cellular component biogenesis at cellular level                |                    |
| GO:0042254 | 0.000183306887678686 | 16.4114942528736                                               | 0.288699743962356  |
| 4          | 149                  | ribosome biogenesis                                            |                    |
| GO:0007603 | 0.00019698305497146  | 123.196581196581                                               | 0.021313403916684  |
| 2          | 11                   | phototransduction, visible light                               |                    |
| GO:0042273 | 0.000236096351242935 | 110.869230769231                                               | 0.023250986090928  |
| 2          | 12                   | ribosomal large subunit biogenesis                             |                    |
| GO:0042274 | 0.00054339147293453  | 69.2644230769231                                               | 0.0348764791363919 |
| 2          | 18                   | ribosomal small subunit biogenesis                             |                    |
| GO:0009584 | 0.000673184465959876 | 61.5598290598291                                               | 0.0387516434848799 |
| 2          | 20                   | detection of visible light                                     |                    |
| GO:0022618 | 0.000800324303079238 | 18.6926086956522                                               | 0.18407030655318   |

Stable4\_20PerPair

|                                                                  |        |                                                                                                                                                     |                   |                    |      |                    |  |                     |   |
|------------------------------------------------------------------|--------|-----------------------------------------------------------------------------------------------------------------------------------------------------|-------------------|--------------------|------|--------------------|--|---------------------|---|
| 3                                                                | 95     | ribonucleoprotein complex assembly                                                                                                                  |                   |                    |      |                    |  |                     |   |
| GO:0071826                                                       |        | 0.000928927504268237                                                                                                                                | 17.7228865979381  |                    |      |                    |  | 0.1937582174244     | 3 |
| 100                                                              |        | ribonucleoprotein complex subunit organization                                                                                                      |                   |                    |      |                    |  |                     |   |
| GO:0006364                                                       |        | 0.00104074135129846                                                                                                                                 | 17.0162376237624  |                    |      |                    |  | 0.201508546121376   |   |
| 3                                                                | 104    | rRNA processing                                                                                                                                     |                   |                    |      |                    |  |                     |   |
| GO:0016072                                                       |        | 0.00122389145234099                                                                                                                                 | 16.0553271028037  |                    |      |                    |  | 0.21313403916684    |   |
| 3                                                                | 110    | rRNA metabolic process                                                                                                                              |                   |                    |      |                    |  |                     |   |
| GO:0071482                                                       |        | 0.00173229202858174                                                                                                                                 | 36.9051282051282  |                    |      |                    |  | 0.0620026295758079  |   |
| 2                                                                | 32     | cellular response to light stimulus                                                                                                                 |                   |                    |      |                    |  |                     |   |
| GO:0007602                                                       |        | 0.00184184722471557                                                                                                                                 | 35.712158808933   | 0.0639402117500519 |      |                    |  |                     | 2 |
| 33                                                               |        | phototransduction                                                                                                                                   |                   |                    |      |                    |  |                     |   |
| GO:0009583                                                       |        | 0.0026982209398674                                                                                                                                  | 29.1194331983806  |                    |      |                    |  | 0.0775032869697599  |   |
| 2                                                                | 40     | detection of light stimulus                                                                                                                         |                   |                    |      |                    |  |                     |   |
| GO:0071478                                                       |        | 0.00559649222465406                                                                                                                                 | 19.7348901098901  |                    |      |                    |  | 0.112379766106152   |   |
| 2                                                                | 58     | cellular response to radiation                                                                                                                      |                   |                    |      |                    |  |                     |   |
| GO:0016056                                                       |        | 0.00580189185011537                                                                                                                                 | 267.0555555555556 |                    |      |                    |  | 0.00581274652273199 |   |
| 1                                                                | 3      | rhodopsin mediated signaling pathway                                                                                                                |                   |                    |      |                    |  |                     |   |
| GO:0031125                                                       |        | 0.00580189185011537                                                                                                                                 | 267.0555555555556 |                    |      |                    |  | 0.00581274652273199 |   |
| 1                                                                | 3      | rRNA 3'-end processing                                                                                                                              |                   |                    |      |                    |  |                     |   |
| GO:0035845                                                       |        | 0.00580189185011537                                                                                                                                 | 267.0555555555556 |                    |      |                    |  | 0.00581274652273199 |   |
| 1                                                                | 3      | photoreceptor cell outer segment organization                                                                                                       |                   |                    |      |                    |  |                     |   |
| GO:0046544                                                       |        | 0.00580189185011537                                                                                                                                 | 267.0555555555556 |                    |      |                    |  | 0.00581274652273199 |   |
| 1                                                                | 3      | development of secondary male sexual characteristics                                                                                                |                   |                    |      |                    |  |                     |   |
| GO:0034470                                                       |        | 0.00663066539227953                                                                                                                                 | 8.66558375634518  |                    |      |                    |  | 0.387516434848799   |   |
| 3                                                                | 200    | ncRNA processing                                                                                                                                    |                   |                    |      |                    |  |                     |   |
| GO:0000255                                                       |        | 0.00772863236978594                                                                                                                                 | 178.024691358025  |                    |      |                    |  | 0.00775032869697599 |   |
| 1                                                                | 4      | allantoin metabolic process                                                                                                                         |                   |                    |      |                    |  |                     |   |
| GO:0000447                                                       |        | 0.00772863236978594                                                                                                                                 | 178.024691358025  |                    |      |                    |  | 0.00775032869697599 |   |
| 1                                                                | 4      | endonucleolytic cleavage in ITS1 to separate SSU-rRNA from 5.8S rRNA and LSU-rRNA from tricistronic rRNA transcript (SSU-rRNA, 5.8S rRNA, LSU-rRNA) |                   |                    |      |                    |  |                     |   |
| GO:0000469                                                       |        | 0.00772863236978594                                                                                                                                 | 178.024691358025  |                    |      |                    |  | 0.00775032869697599 |   |
| 1                                                                | 4      | cleavage involved in rRNA processing                                                                                                                |                   |                    |      |                    |  |                     |   |
| GO:0000478                                                       |        | 0.00772863236978594                                                                                                                                 | 178.024691358025  |                    |      |                    |  | 0.00775032869697599 |   |
| 1                                                                | 4      | endonucleolytic cleavage involved in rRNA processing                                                                                                |                   |                    |      |                    |  |                     |   |
| GO:0000479                                                       |        | 0.00772863236978594                                                                                                                                 | 178.024691358025  |                    |      |                    |  | 0.00775032869697599 |   |
| 1                                                                | 4      | endonucleolytic cleavage of tricistronic rRNA transcript (SSU-rRNA, 5.8S rRNA, LSU-rRNA)                                                            |                   |                    |      |                    |  |                     |   |
| GO:0006549                                                       |        | 0.00772863236978594                                                                                                                                 | 178.024691358025  |                    |      |                    |  | 0.00775032869697599 |   |
| 1                                                                | 4      | isoleucine metabolic process                                                                                                                        |                   |                    |      |                    |  |                     |   |
| GO:0046449                                                       |        | 0.00772863236978594                                                                                                                                 | 178.024691358025  |                    |      |                    |  | 0.00775032869697599 |   |
| 1                                                                | 4      | creatinine metabolic process                                                                                                                        |                   |                    |      |                    |  |                     |   |
| GO:0046642                                                       |        | 0.00772863236978594                                                                                                                                 | 178.024691358025  |                    |      |                    |  | 0.00775032869697599 |   |
| 1                                                                | 4      | negative regulation of alpha-beta T cell proliferation                                                                                              |                   |                    |      |                    |  |                     |   |
| GO:0070669                                                       |        | 0.00772863236978594                                                                                                                                 | 178.024691358025  |                    |      |                    |  | 0.00775032869697599 |   |
| 1                                                                | 4      | response to interleukin-2                                                                                                                           |                   |                    |      |                    |  |                     |   |
| GO:0009582                                                       |        | 0.00783920174745108                                                                                                                                 | 16.4822043628014  |                    |      |                    |  | 0.133693170022836   |   |
| 2                                                                | 69     | detection of abiotic stimulus                                                                                                                       |                   |                    |      |                    |  |                     |   |
| GO:0008298                                                       |        | 0.00965177200387202                                                                                                                                 | 133.509259259259  |                    |      |                    |  | 0.00968791087121998 |   |
| 1                                                                | 5      | intracellular mRNA localization                                                                                                                     |                   |                    |      |                    |  |                     |   |
| GO:0072338                                                       |        | 0.00965177200387202                                                                                                                                 | 133.509259259259  |                    |      |                    |  | 0.00968791087121998 |   |
| 1                                                                | 5      | cellular lactam metabolic process                                                                                                                   |                   |                    |      |                    |  |                     |   |
| Tissue: Skin_Sun_Exposed_Lower_leg=>Thyroid Type: asymmetric     |        |                                                                                                                                                     |                   |                    |      |                    |  |                     |   |
| SourceGene: PTDSS2(ENSG00000174915.7)                            |        |                                                                                                                                                     |                   |                    |      |                    |  |                     |   |
| TargetGeneSet: TNNI1 C1orf186 RP11 ACTA1 FAHD2A MYL1 ANXA5       |        |                                                                                                                                                     |                   |                    |      |                    |  |                     |   |
| ERCC4 OR1F12P LY6G6E STX7 SLC26A4 LZTS2 TNNI2 AGBL2 FADS3 MYBPC1 |        |                                                                                                                                                     |                   |                    |      |                    |  |                     |   |
| STK24-AS1 DDX18P1 SLC25A29 SLC24A1 CTD MYLPF MYH2 DBF4B          |        |                                                                                                                                                     |                   |                    |      |                    |  |                     |   |
| C19orf24 CKM TNNT1 BPIFA2 SALL4                                  |        |                                                                                                                                                     |                   |                    |      |                    |  |                     |   |
| GOBPID                                                           | Pvalue | OddsRatio                                                                                                                                           | ExpCount          | Count              | Size | Term               |  |                     |   |
| GO:0030049                                                       |        | 4.45877744890921e-14                                                                                                                                | 242.290865384615  |                    |      | 0.0539755034253685 |  |                     |   |
| 7                                                                | 39     | muscle filament sliding                                                                                                                             |                   |                    |      |                    |  |                     |   |
| GO:0033275                                                       |        | 4.45877744890921e-14                                                                                                                                | 242.290865384615  |                    |      | 0.0539755034253685 |  |                     |   |
| 7                                                                | 39     | actin-myosin filament sliding                                                                                                                       |                   |                    |      |                    |  |                     |   |
| GO:0070252                                                       |        | 7.80225094085748e-14                                                                                                                                | 221.476923076923  |                    |      | 0.0581274652273199 |  |                     |   |

STable4\_20PerPair

|            |     |                                                        |                     |
|------------|-----|--------------------------------------------------------|---------------------|
| 7          | 42  | actin-mediated cell contraction                        |                     |
| GO:0030048 |     | 9.73465781956882e-13                                   | 148.894970414201    |
| 7          | 59  | actin filament-based movement                          | 0.0816552487717113  |
| GO:0006936 |     | 2.00080286424127e-08                                   | 32.9552387267904    |
| 7          | 239 | muscle contraction                                     | 0.330772956888797   |
| GO:0003012 |     | 4.18005688822706e-08                                   | 29.4636174636175    |
| 7          | 266 | muscle system process                                  | 0.368140613106359   |
| GO:0030029 |     | 1.12458856263389e-06                                   | 17.7451583710407    |
| 7          | 432 | actin filament-based process                           | 0.597882499481005   |
| GO:0006941 |     | 3.04424438900589e-06                                   | 50.5633802816901    |
| 4          | 75  | striated muscle contraction                            | 0.103799045048786   |
| GO:0003009 |     | 0.0003068190587918                                     | 94.2091503267974    |
| 2          | 19  | skeletal muscle contraction                            | 0.0262957580790257  |
| GO:0050879 |     | 0.000579757517178671                                   | 66.6990740740741    |
| 2          | 26  | multicellular organismal movement                      | 0.0359836689502457  |
| GO:0050881 |     | 0.000579757517178671                                   | 66.6990740740741    |
| 2          | 26  | musculoskeletal movement                               | 0.0359836689502457  |
| GO:0007517 |     | 0.00070401627756025                                    | 11.8160535117057    |
| 4          | 303 | muscle organ development                               | 0.419348141997094   |
| GO:0061061 |     | 0.00213735663531172                                    | 8.65802469135802    |
| 4          | 409 | muscle structure development                           | 0.56605079233271    |
| GO:0006295 |     | 0.00414650474202016                                    | 379.710526315789    |
| 1          | 3   | nucleotide-excision repair, DNA incision, 3'-to lesion | 0.00415196180195142 |
| GO:0006296 |     | 0.00414650474202016                                    | 379.710526315789    |
| 1          | 3   | nucleotide-excision repair, DNA incision, 5'-to lesion | 0.00415196180195142 |
| GO:0010834 |     | 0.00414650474202016                                    | 379.710526315789    |
| 1          | 3   | telomere maintenance via telomere shortening           | 0.00415196180195142 |
| GO:0042396 |     | 0.00414650474202016                                    | 379.710526315789    |
| 1          | 3   | phosphagen biosynthetic process                        | 0.00415196180195142 |
| GO:0003231 |     | 0.00487767138278522                                    | 21.5570570570571    |
| 2          | 76  | cardiac ventricle development                          | 0.105183032316103   |
| GO:0014706 |     | 0.00534538779923922                                    | 9.65614353849648    |
| 3          | 262 | striated muscle tissue development                     | 0.362604664037091   |
| GO:0000710 |     | 0.00552503948074912                                    | 253.122807017544    |
| 1          | 4   | meiotic mismatch repair                                | 0.00553594906926856 |
| GO:0003010 |     | 0.00552503948074912                                    | 253.122807017544    |
| 1          | 4   | voluntary skeletal muscle contraction                  | 0.00553594906926856 |
| GO:0009642 |     | 0.00552503948074912                                    | 253.122807017544    |
| 1          | 4   | response to light intensity                            | 0.00553594906926856 |
| GO:0014721 |     | 0.00552503948074912                                    | 253.122807017544    |
| 1          | 4   | twitch skeletal muscle contraction                     | 0.00553594906926856 |
| GO:0015705 |     | 0.00552503948074912                                    | 253.122807017544    |
| 1          | 4   | iodide transport                                       | 0.00553594906926856 |
| GO:0060537 |     | 0.00599176048850142                                    | 9.25555555555556    |
| 3          | 273 | muscle tissue development                              | 0.377828523977579   |
| GO:0006937 |     | 0.0066303979558913                                     | 18.3192848020434    |
| 2          | 89  | regulation of muscle contraction                       | 0.123174866791226   |
| GO:0001778 |     | 0.00690176123684949                                    | 189.828947368421    |
| 1          | 5   | plasma membrane repair                                 | 0.0069199363365857  |
| GO:0030240 |     | 0.00690176123684949                                    | 189.828947368421    |
| 1          | 5   | skeletal muscle thin filament assembly                 | 0.0069199363365857  |
| GO:0003205 |     | 0.00721940175550811                                    | 17.5091575091575    |
| 2          | 93  | cardiac chamber development                            | 0.128710815860494   |
| GO:0000244 |     | 0.00827667226933348                                    | 151.852631578947    |
| 1          | 6   | assembly of spliceosomal tri-snRNP                     | 0.00830392360390284 |
| GO:0014866 |     | 0.00827667226933348                                    | 151.852631578947    |
| 1          | 6   | skeletal myofibril assembly                            | 0.00830392360390284 |
| GO:0090257 |     | 0.00929093127083658                                    | 15.3066239316239    |
| 2          | 106 | regulation of muscle system process                    | 0.146702650335617   |
| GO:0000712 |     | 0.00964977483455431                                    | 126.535087719298    |
| 1          | 7   | resolution of meiotic recombination intermediates      | 0.00968791087121998 |
| GO:0033683 |     | 0.00964977483455431                                    | 126.535087719298    |
| 1          | 7   | nucleotide-excision repair, DNA incision               | 0.00968791087121998 |

Stable4\_20PerPair

|                                          |                                                       |                                                                  |                      |
|------------------------------------------|-------------------------------------------------------|------------------------------------------------------------------|----------------------|
| GO:0051307                               | 0.00964977483455431                                   | 126.535087719298                                                 | 0.00968791087121998  |
| 1                                        | 7                                                     | meiotic chromosome separation                                    |                      |
| Tissue: Skin_Sun                         | Exposed_Lower_leg=>Thyroid                            | Type: asymmetric                                                 |                      |
| SourceGene:                              | RP11-1084E5.1(ENSG00000253796.1)                      |                                                                  |                      |
| TargetGeneSet:                           | TNFRSF18 PLA2G2D GBP4 HSD3BP3 FCRL5 FCRL3 FCRLA CD84  |                                                                  |                      |
| SLAMF7 LAX1                              | GPR113 IGKJ4 IGKJ2 IGKJ1 IGKV1-5 IGKV1-12 IGKV3-15    |                                                                  |                      |
| IGKV6-21                                 | IGKV2-30 CXCR2P1 TIGIT PARP15 IGJ HAVCR1 LTB RP11     |                                                                  |                      |
| ZC3H12D TAGAP                            | TRGC1 TRGV7 BLK PTK2B PNOC PAX5 MS4A1 POU2AF1         |                                                                  |                      |
| CRTAM CLECL1                             | BIN2 GS1 FLT3 CYSLTR2 TRAV1-2 TRAV27 IGHG2 IGHM       |                                                                  |                      |
| IGHJ5 IGHJ3                              | IGHV6-1 IGHV2-5 IGHV3-11 IGHV4-31 IGHV3-33            |                                                                  |                      |
| IGHV3-66                                 | IGHV1-69 IGHV3-74 ARRDC4 TNFRSF17 ITGAL               |                                                                  |                      |
| GPR114 SNORD68                           | P2RX5 TBC1D27 TNFRSF13B RAB37 CD79A NLRP7 GTSF1L ZBP1 |                                                                  |                      |
| RSPH1 IGLV6-57                           | IGLV1-51 IGLV9-49 IGLV1-36 IGLV3-25                   |                                                                  |                      |
| IGLV2-23                                 | IGLV2-8 IGLL5 IGLC1 IL2RB MTCP1 RP4 CSAG1             |                                                                  |                      |
| GOBPID                                   | Pvalue OddsRatio ExpCount Count Size Term             |                                                                  |                      |
| GO:0006959                               | 1.30915259897009e-06                                  | 20.5359195402299                                                 | 0.354577537886651    |
| 6                                        | 122                                                   | humoral immune response                                          |                      |
| GO:0046649                               | 3.31811191594273e-06                                  | 8.9954974271012                                                  | 1.25845962217148 9   |
| 433                                      |                                                       | lymphocyte activation                                            |                      |
| GO:0042113                               | 4.88940263576622e-06                                  | 16.1700680272109                                                 | 0.444675108988997    |
| 6                                        | 153                                                   | B cell activation                                                |                      |
| GO:0002449                               | 8.09150784582112e-06                                  | 14.7494824016563                                                 | 0.485364334648121    |
| 6                                        | 167                                                   | lymphocyte mediated immunity                                     |                      |
| GO:0002252                               | 1.2838448008193e-05                                   | 8.73389355742297                                                 | 1.12186007888727     |
| 8                                        | 386                                                   | immune effector process                                          |                      |
| GO:0002443                               | 3.05321979791158e-05                                  | 11.5479674796748                                                 | 0.613244758148225    |
| 6                                        | 211                                                   | leukocyte mediated immunity                                      |                      |
| GO:0042267                               | 7.10970809712616e-05                                  | 44.2584615384615                                                 | 0.0813784513182479   |
| 3                                        | 28                                                    | natural killer cell mediated cytotoxicity                        |                      |
| GO:0050778                               | 7.66078716559701e-05                                  | 7.87226890756302                                                 | 1.05791986713722     |
| 7                                        | 364                                                   | positive regulation of immune response                           |                      |
| GO:0002228                               | 7.914037128239e-05                                    | 42.5532544378698                                                 | 0.0842848245796139   |
| 3                                        | 29                                                    | natural killer cell mediated immunity                            |                      |
| GO:0051250                               | 0.00010048412649917                                   | 18.8539473684211                                                 | 0.244135353954744    |
| 4                                        | 84                                                    | negative regulation of lymphocyte activation                     |                      |
| GO:0033209                               | 0.000152468956192974                                  | 33.5104895104895                                                 | 0.104629437409176    |
| 3                                        | 36                                                    | tumor necrosis factor-mediated signaling pathway                 |                      |
| GO:0051249                               | 0.000155125843090672                                  | 8.50300842358604                                                 | 0.822503632966577    |
| 6                                        | 283                                                   | regulation of lymphocyte activation                              |                      |
| GO:0002695                               | 0.00017558057522173                                   | 16.2037351443124                                                 | 0.281918206352502    |
| 4                                        | 97                                                    | negative regulation of leukocyte activation                      |                      |
| GO:0050866                               | 0.000238202804191413                                  | 14.911933298593                                                  | 0.305169192443429 4  |
| 105                                      |                                                       | negative regulation of cell activation                           |                      |
| GO:0002694                               | 0.000306434352846846                                  | 7.45714285714286                                                 | 0.932945816898485    |
| 6                                        | 321                                                   | regulation of leukocyte activation                               |                      |
| GO:0001909                               | 0.000338648297043203                                  | 25.1136363636364                                                 | 0.136599543284202    |
| 3                                        | 47                                                    | leukocyte mediated cytotoxicity                                  |                      |
| GO:0006958                               | 0.00040687161867526                                   | 23.505728314239                                                  | 0.1453186630683 3 50 |
| complement activation, classical pathway |                                                       |                                                                  |                      |
| GO:0050865                               | 0.000436394388543592                                  | 6.95944609297725                                                 | 0.996886028648536    |
| 6                                        | 343                                                   | regulation of cell activation                                    |                      |
| GO:0006956                               | 0.000803009247930836                                  | 18.3961538461538                                                 | 0.183101515466058    |
| 3                                        | 63                                                    | complement activation                                            |                      |
| GO:0045954                               | 0.000845353877431116                                  | 55.3692307692308                                                 | 0.0435955989204899   |
| 2                                        | 15                                                    | positive regulation of natural killer cell mediated cytotoxicity |                      |
| GO:0002455                               | 0.000879712823769607                                  | 17.8002481389578                                                 | 0.18891426198879     |
| 3                                        | 65                                                    | humoral immune response mediated by circulating immunoglobulin   |                      |
| GO:0002717                               | 0.000964339849869892                                  | 51.4107142857143                                                 | 0.0465019721818559   |
| 2                                        | 16                                                    | positive regulation of natural killer cell mediated immunity     |                      |
| GO:0030183                               | 0.00100324756452195                                   | 16.9751479289941                                                 | 0.197633381772888    |
| 3                                        | 68                                                    | B cell differentiation                                           |                      |
| GO:0001906                               | 0.00104673776673337                                   | 16.7167832167832                                                 | 0.200539755034254    |
| 3                                        | 69                                                    | cell killing                                                     |                      |

Stable4\_20PerPair

|                                                     |                                                               |                           |                      |
|-----------------------------------------------------|---------------------------------------------------------------|---------------------------|----------------------|
| GO:0002683                                          | 0.00116752255233183                                           | 9.61740890688259          | 0.465019721818559    |
| 4 160                                               | negative regulation of immune system process                  |                           |                      |
| GO:0071356                                          | 0.00133281622931245                                           | 15.3173076923077          | 0.21797799460245     |
| 3 75                                                | cellular response to tumor necrosis factor                    |                           |                      |
| GO:0042269                                          | 0.00136661034477667                                           | 42.3294117647059          | 0.0552210919659539   |
| 2 19                                                | regulation of natural killer cell mediated cytotoxicity       |                           |                      |
| GO:0002715                                          | 0.00151566211163264                                           | 39.975 0.0581274652273199 | 2 20                 |
| regulation of natural killer cell mediated immunity |                                                               |                           |                      |
| GO:0046651                                          | 0.00152453015269653                                           | 8.92293233082707          | 0.499896200954951    |
| 4 172                                               | lymphocyte proliferation                                      |                           |                      |
| GO:0032943                                          | 0.00159065866290391                                           | 8.81671826625387          | 0.505708947477683    |
| 4 174                                               | mononuclear cell proliferation                                |                           |                      |
| GO:0002253                                          | 0.00166625680359298                                           | 6.48786541643685          | 0.869005605148433    |
| 5 299                                               | activation of immune response                                 |                           |                      |
| GO:0072376                                          | 0.00172353849898644                                           | 13.9532619279455          | 0.238322607432012    |
| 3 82                                                | protein activation cascade                                    |                           |                      |
| GO:0070661                                          | 0.00187524961800535                                           | 8.41573033707865          | 0.528959933568611    |
| 4 182                                               | leukocyte proliferation                                       |                           |                      |
| GO:0043552                                          | 0.00200710821962668                                           | 34.2571428571429          | 0.0668465850114179   |
| 2 23                                                | positive regulation of phosphatidylinositol 3-kinase activity |                           |                      |
| GO:0001912                                          | 0.00218554691840735                                           | 32.6977272727273          | 0.0697529582727839   |
| 2 24                                                | positive regulation of leukocyte mediated cytotoxicity        |                           |                      |
| GO:0043551                                          | 0.00218554691840735                                           | 32.6977272727273          | 0.0697529582727839   |
| 2 24                                                | regulation of phosphatidylinositol 3-kinase activity          |                           |                      |
| GO:0050850                                          | 0.00218554691840735                                           | 32.6977272727273          | 0.0697529582727839   |
| 2 24                                                | positive regulation of calcium-mediated signaling             |                           |                      |
| GO:0090218                                          | 0.00218554691840735                                           | 32.6977272727273          | 0.0697529582727839   |
| 2 24                                                | positive regulation of lipid kinase activity                  |                           |                      |
| GO:0007218                                          | 0.00224985752505742                                           | 12.6631299734748          | 0.26157359352294     |
| 3 90                                                | neuropeptide signaling pathway                                |                           |                      |
| GO:0050869                                          | 0.00256410862520172                                           | 29.96875                  | 0.0755657047955159 2 |
| 26                                                  | negative regulation of B cell activation                      |                           |                      |
| GO:0034612                                          | 0.00262425819952185                                           | 11.9707357859532          | 0.27610545982977     |
| 3 95                                                | response to tumor necrosis factor                             |                           |                      |
| GO:0019221                                          | 0.00295183107394798                                           | 5.65999034749035          | 0.991073282125804    |
| 5 341                                               | cytokine-mediated signaling pathway                           |                           |                      |
| GO:0031343                                          | 0.00318554101184146                                           | 26.6333333333333          | 0.0842848245796139   |
| 2 29                                                | positive regulation of cell killing                           |                           |                      |
| GO:0043550                                          | 0.00318554101184146                                           | 26.6333333333333          | 0.0842848245796139   |
| 2 29                                                | regulation of lipid kinase activity                           |                           |                      |
| GO:0050853                                          | 0.00318554101184146                                           | 26.6333333333333          | 0.0842848245796139   |
| 2 29                                                | B cell receptor signaling pathway                             |                           |                      |
| GO:0001910                                          | 0.00340681136275634                                           | 25.6803571428571          | 0.0871911978409799   |
| 2 30                                                | regulation of leukocyte mediated cytotoxicity                 |                           |                      |
| GO:0016064                                          | 0.00407240445033978                                           | 10.1858974358974          | 0.322607432011626    |
| 3 111                                               | immunoglobulin mediated immune response                       |                           |                      |
| GO:0050848                                          | 0.00411243099306514                                           | 23.1903225806452          | 0.0959103176250778   |
| 2 33                                                | regulation of calcium-mediated signaling                      |                           |                      |
| GO:0019724                                          | 0.00438827834974687                                           | 9.90852390852391          | 0.331326551795723    |
| 3 114                                               | B cell mediated immunity                                      |                           |                      |
| GO:0032655                                          | 0.00461728111549336                                           | 21.7818181818182          | 0.10172306414781     |
| 2 35                                                | regulation of interleukin-12 production                       |                           |                      |
| GO:0031341                                          | 0.00487991712486397                                           | 21.1397058823529          | 0.104629437409176    |
| 2 36                                                | regulation of cell killing                                    |                           |                      |
| GO:0032615                                          | 0.00514930741245981                                           | 20.5342857142857          | 0.107535810670542    |
| 2 37                                                | interleukin-12 production                                     |                           |                      |
| GO:0071345                                          | 0.00650112841672883                                           | 4.66083078152044          | 1.19451941042142     |
| 5 411                                               | cellular response to cytokine stimulus                        |                           |                      |
| GO:0002705                                          | 0.00722085666126351                                           | 17.1035714285714          | 0.127880423500104    |
| 2 44                                                | positive regulation of leukocyte mediated immunity            |                           |                      |
| GO:0002708                                          | 0.00722085666126351                                           | 17.1035714285714          | 0.127880423500104    |
| 2 44                                                | positive regulation of lymphocyte mediated immunity           |                           |                      |
| GO:0010522                                          | 0.00722085666126351                                           | 17.1035714285714          | 0.127880423500104    |

Stable4\_20PerPair

|                                                                      |     |                                                                                                             |                  |                     |  |  |  |                    |   |
|----------------------------------------------------------------------|-----|-------------------------------------------------------------------------------------------------------------|------------------|---------------------|--|--|--|--------------------|---|
| 2                                                                    | 44  | regulation of calcium ion transport into cytosol                                                            |                  |                     |  |  |  |                    |   |
| GO:0051924                                                           |     | 0.00837453187443606                                                                                         | 7.78396072013093 |                     |  |  |  | 0.418517749636703  |   |
| 3                                                                    | 144 | regulation of calcium ion transport                                                                         |                  |                     |  |  |  |                    |   |
| GO:0002291                                                           |     | 0.00869440324222703                                                                                         | 175.69512195122  | 0.00871911978409799 |  |  |  |                    | 1 |
| 3                                                                    |     | T cell activation via T cell receptor contact with antigen bound to MHC molecule on antigen presenting cell |                  |                     |  |  |  |                    |   |
| GO:0016056                                                           |     | 0.00869440324222703                                                                                         | 175.69512195122  | 0.00871911978409799 |  |  |  |                    | 1 |
| 3                                                                    |     | rhodopsin mediated signaling pathway                                                                        |                  |                     |  |  |  |                    |   |
| GO:0031585                                                           |     | 0.00869440324222703                                                                                         | 175.69512195122  | 0.00871911978409799 |  |  |  |                    | 1 |
| 3                                                                    |     | regulation of inositol 1,4,5-trisphosphate-sensitive calcium-release channel activity                       |                  |                     |  |  |  |                    |   |
| GO:0031987                                                           |     | 0.00869440324222703                                                                                         | 175.69512195122  | 0.00871911978409799 |  |  |  |                    | 1 |
| 3                                                                    |     | locomotion involved in locomotory behavior                                                                  |                  |                     |  |  |  |                    |   |
| GO:0038110                                                           |     | 0.00869440324222703                                                                                         | 175.69512195122  | 0.00871911978409799 |  |  |  |                    | 1 |
| 3                                                                    |     | interleukin-2-mediated signaling pathway                                                                    |                  |                     |  |  |  |                    |   |
| GO:0051643                                                           |     | 0.00869440324222703                                                                                         | 175.69512195122  | 0.00871911978409799 |  |  |  |                    | 1 |
| 3                                                                    |     | endoplasmic reticulum localization                                                                          |                  |                     |  |  |  |                    |   |
| GO:0001776                                                           |     | 0.00889458699134167                                                                                         | 15.2787234042553 |                     |  |  |  | 0.142412289806934  |   |
| 2                                                                    | 49  | leukocyte homeostasis                                                                                       |                  |                     |  |  |  |                    |   |
| GO:0046427                                                           |     | 0.00960811169746031                                                                                         | 14.6530612244898 |                     |  |  |  | 0.148225036329666  |   |
| 2                                                                    | 51  | positive regulation of JAK-STAT cascade                                                                     |                  |                     |  |  |  |                    |   |
| Tissue: Skin_Sun_Exposed_Lower_leg=>Thyroid Type: cluster            |     |                                                                                                             |                  |                     |  |  |  |                    |   |
| SourceGene: RP11-1084E5.1(ENSG00000253796.1)                         |     |                                                                                                             |                  |                     |  |  |  |                    |   |
| TargetGeneSet: TNFRSF18 PLA2G2D GBP4 HSD3BP3 FCRL5 FCRL3 FCRLA CD84  |     |                                                                                                             |                  |                     |  |  |  |                    |   |
| SLAMF7 LAX1 GPR113 IGKJ4 IGKJ2 IGKJ1 IGKV1-5 IGKV1-12 IGKV3-15       |     |                                                                                                             |                  |                     |  |  |  |                    |   |
| IGKV6-21 IGKV2-30 CXCR2P1 TIGIT PARP15 IGJ HAVCR1 LTB RP11           |     |                                                                                                             |                  |                     |  |  |  |                    |   |
| ZC3H12D TAGAP TRGC1 TRGV7 BLK PTK2B PNOX PAX5 MS4A1 POU2AF1          |     |                                                                                                             |                  |                     |  |  |  |                    |   |
| CRTAM CLECL1 BIN2 GS1 FLT3 CYSLTR2 TRAV1-2 TRAV27 IGHG2 IGHM         |     |                                                                                                             |                  |                     |  |  |  |                    |   |
| IGHJ5 IGHJ3 IGHV6-1 IGHV2-5 IGHV3-11 IGHV4-31 IGHV3-33               |     |                                                                                                             |                  |                     |  |  |  |                    |   |
| IGHV3-66 IGHV1-69 IGHV3-74 ARRDC4 TNFRSF17 ITGAL                     |     |                                                                                                             |                  |                     |  |  |  |                    |   |
| GPR114 SNORD68 P2RX5 TBC1D27 TNFRSF13B RAB37 CD79A NLRP7 GTSF1L ZBP1 |     |                                                                                                             |                  |                     |  |  |  |                    |   |
| RSPH1 IGLV6-57 IGLV1-51 IGLV9-49 IGLV1-36 IGLV3-25                   |     |                                                                                                             |                  |                     |  |  |  |                    |   |
| IGLV2-23 IGLV2-8 IGLL5 IGLC1 IL2RB MTCP1 RP4 CSAG1                   |     |                                                                                                             |                  |                     |  |  |  |                    |   |
| GOBPID Pvalue OddsRatio ExpCount Count Size Term                     |     |                                                                                                             |                  |                     |  |  |  |                    |   |
| GO:0006959                                                           |     | 1.30915259897009e-06                                                                                        | 20.5359195402299 |                     |  |  |  | 0.354577537886651  |   |
| 6                                                                    | 122 | humoral immune response                                                                                     |                  |                     |  |  |  |                    |   |
| GO:0046649                                                           |     | 3.31811191594273e-06                                                                                        | 8.9954974271012  | 1.25845962217148    |  |  |  |                    | 9 |
| 433                                                                  |     | lymphocyte activation                                                                                       |                  |                     |  |  |  |                    |   |
| GO:0042113                                                           |     | 4.88940263576622e-06                                                                                        | 16.1700680272109 |                     |  |  |  | 0.444675108988997  |   |
| 6                                                                    | 153 | B cell activation                                                                                           |                  |                     |  |  |  |                    |   |
| GO:0002449                                                           |     | 8.09150784582112e-06                                                                                        | 14.7494824016563 |                     |  |  |  | 0.485364334648121  |   |
| 6                                                                    | 167 | lymphocyte mediated immunity                                                                                |                  |                     |  |  |  |                    |   |
| GO:0002252                                                           |     | 1.2838448008193e-05                                                                                         | 8.73389355742297 |                     |  |  |  | 1.12186007888727   |   |
| 8                                                                    | 386 | immune effector process                                                                                     |                  |                     |  |  |  |                    |   |
| GO:0002443                                                           |     | 3.05321979791158e-05                                                                                        | 11.5479674796748 |                     |  |  |  | 0.613244758148225  |   |
| 6                                                                    | 211 | leukocyte mediated immunity                                                                                 |                  |                     |  |  |  |                    |   |
| GO:0042267                                                           |     | 7.10970809712616e-05                                                                                        | 44.2584615384615 |                     |  |  |  | 0.0813784513182479 |   |
| 3                                                                    | 28  | natural killer cell mediated cytotoxicity                                                                   |                  |                     |  |  |  |                    |   |
| GO:0050778                                                           |     | 7.66078716559701e-05                                                                                        | 7.87226890756302 |                     |  |  |  | 1.05791986713722   |   |
| 7                                                                    | 364 | positive regulation of immune response                                                                      |                  |                     |  |  |  |                    |   |
| GO:0002228                                                           |     | 7.914037128239e-05                                                                                          | 42.5532544378698 |                     |  |  |  | 0.0842848245796139 |   |
| 3                                                                    | 29  | natural killer cell mediated immunity                                                                       |                  |                     |  |  |  |                    |   |
| GO:0051250                                                           |     | 0.00010048412649917                                                                                         | 18.8539473684211 |                     |  |  |  | 0.244135353954744  |   |
| 4                                                                    | 84  | negative regulation of lymphocyte activation                                                                |                  |                     |  |  |  |                    |   |
| GO:0033209                                                           |     | 0.000152468956192974                                                                                        | 33.5104895104895 |                     |  |  |  | 0.104629437409176  |   |
| 3                                                                    | 36  | tumor necrosis factor-mediated signaling pathway                                                            |                  |                     |  |  |  |                    |   |
| GO:0051249                                                           |     | 0.000155125843090672                                                                                        | 8.50300842358604 |                     |  |  |  | 0.822503632966577  |   |
| 6                                                                    | 283 | regulation of lymphocyte activation                                                                         |                  |                     |  |  |  |                    |   |
| GO:0002695                                                           |     | 0.00017558057522173                                                                                         | 16.2037351443124 |                     |  |  |  | 0.281918206352502  |   |
| 4                                                                    | 97  | negative regulation of leukocyte activation                                                                 |                  |                     |  |  |  |                    |   |
| GO:0050866                                                           |     | 0.000238202804191413                                                                                        | 14.911933298593  | 0.305169192443429   |  |  |  |                    | 4 |
| 105                                                                  |     | negative regulation of cell activation                                                                      |                  |                     |  |  |  |                    |   |
| GO:0002694                                                           |     | 0.000306434352846846                                                                                        | 7.45714285714286 |                     |  |  |  | 0.932945816898485  |   |

STable4\_20PerPair

|            |     |                                                                  |                           |                    |      |
|------------|-----|------------------------------------------------------------------|---------------------------|--------------------|------|
| 6          | 321 | regulation of leukocyte activation                               |                           |                    |      |
| GO:0001909 |     | 0.000338648297043203                                             | 25.1136363636364          | 0.136599543284202  |      |
| 3          | 47  | leukocyte mediated cytotoxicity                                  |                           |                    |      |
| GO:0006958 |     | 0.00040687161867526                                              | 23.505728314239           | 0.1453186630683    | 3 50 |
|            |     | complement activation, classical pathway                         |                           |                    |      |
| GO:0050865 |     | 0.000436394388543592                                             | 6.95944609297725          | 0.996886028648536  |      |
| 6          | 343 | regulation of cell activation                                    |                           |                    |      |
| GO:0006956 |     | 0.000803009247930836                                             | 18.3961538461538          | 0.183101515466058  |      |
| 3          | 63  | complement activation                                            |                           |                    |      |
| GO:0045954 |     | 0.000845353877431116                                             | 55.3692307692308          | 0.0435955989204899 |      |
| 2          | 15  | positive regulation of natural killer cell mediated cytotoxicity |                           |                    |      |
| GO:0002455 |     | 0.000879712823769607                                             | 17.8002481389578          | 0.18891426198879   |      |
| 3          | 65  | humoral immune response mediated by circulating immunoglobulin   |                           |                    |      |
| GO:0002717 |     | 0.000964339849869892                                             | 51.4107142857143          | 0.0465019721818559 |      |
| 2          | 16  | positive regulation of natural killer cell mediated immunity     |                           |                    |      |
| GO:0030183 |     | 0.00100324756452195                                              | 16.9751479289941          | 0.197633381772888  |      |
| 3          | 68  | B cell differentiation                                           |                           |                    |      |
| GO:0001906 |     | 0.00104673776673337                                              | 16.7167832167832          | 0.200539755034254  |      |
| 3          | 69  | cell killing                                                     |                           |                    |      |
| GO:0002683 |     | 0.00116752255233183                                              | 9.61740890688259          | 0.465019721818559  |      |
| 4          | 160 | negative regulation of immune system process                     |                           |                    |      |
| GO:0071356 |     | 0.00133281622931245                                              | 15.3173076923077          | 0.21797799460245   |      |
| 3          | 75  | cellular response to tumor necrosis factor                       |                           |                    |      |
| GO:0042269 |     | 0.00136661034477667                                              | 42.3294117647059          | 0.0552210919659539 |      |
| 2          | 19  | regulation of natural killer cell mediated cytotoxicity          |                           |                    |      |
| GO:0002715 |     | 0.00151566211163264                                              | 39.975 0.0581274652273199 | 2 20               |      |
|            |     | regulation of natural killer cell mediated immunity              |                           |                    |      |
| GO:0046651 |     | 0.00152453015269653                                              | 8.92293233082707          | 0.499896200954951  |      |
| 4          | 172 | lymphocyte proliferation                                         |                           |                    |      |
| GO:0032943 |     | 0.00159065866290391                                              | 8.81671826625387          | 0.505708947477683  |      |
| 4          | 174 | mononuclear cell proliferation                                   |                           |                    |      |
| GO:0002253 |     | 0.00166625680359298                                              | 6.48786541643685          | 0.869005605148433  |      |
| 5          | 299 | activation of immune response                                    |                           |                    |      |
| GO:0072376 |     | 0.00172353849898644                                              | 13.9532619279455          | 0.238322607432012  |      |
| 3          | 82  | protein activation cascade                                       |                           |                    |      |
| GO:0070661 |     | 0.00187524961800535                                              | 8.41573033707865          | 0.528959933568611  |      |
| 4          | 182 | leukocyte proliferation                                          |                           |                    |      |
| GO:0043552 |     | 0.00200710821962668                                              | 34.2571428571429          | 0.0668465850114179 |      |
| 2          | 23  | positive regulation of phosphatidylinositol 3-kinase activity    |                           |                    |      |
| GO:0001912 |     | 0.00218554691840735                                              | 32.6977272727273          | 0.0697529582727839 |      |
| 2          | 24  | positive regulation of leukocyte mediated cytotoxicity           |                           |                    |      |
| GO:0043551 |     | 0.00218554691840735                                              | 32.6977272727273          | 0.0697529582727839 |      |
| 2          | 24  | regulation of phosphatidylinositol 3-kinase activity             |                           |                    |      |
| GO:0050850 |     | 0.00218554691840735                                              | 32.6977272727273          | 0.0697529582727839 |      |
| 2          | 24  | positive regulation of calcium-mediated signaling                |                           |                    |      |
| GO:0090218 |     | 0.00218554691840735                                              | 32.6977272727273          | 0.0697529582727839 |      |
| 2          | 24  | positive regulation of lipid kinase activity                     |                           |                    |      |
| GO:0007218 |     | 0.00224985752505742                                              | 12.6631299734748          | 0.26157359352294   |      |
| 3          | 90  | neuropeptide signaling pathway                                   |                           |                    |      |
| GO:0050869 |     | 0.00256410862520172                                              | 29.96875                  | 0.0755657047955159 | 2    |
| 26         |     | negative regulation of B cell activation                         |                           |                    |      |
| GO:0034612 |     | 0.00262425819952185                                              | 11.9707357859532          | 0.27610545982977   |      |
| 3          | 95  | response to tumor necrosis factor                                |                           |                    |      |
| GO:0019221 |     | 0.00295183107394798                                              | 5.65999034749035          | 0.991073282125804  |      |
| 5          | 341 | cytokine-mediated signaling pathway                              |                           |                    |      |
| GO:0031343 |     | 0.00318554101184146                                              | 26.6333333333333          | 0.0842848245796139 |      |
| 2          | 29  | positive regulation of cell killing                              |                           |                    |      |
| GO:0043550 |     | 0.00318554101184146                                              | 26.6333333333333          | 0.0842848245796139 |      |
| 2          | 29  | regulation of lipid kinase activity                              |                           |                    |      |
| GO:0050853 |     | 0.00318554101184146                                              | 26.6333333333333          | 0.0842848245796139 |      |
| 2          | 29  | B cell receptor signaling pathway                                |                           |                    |      |
| GO:0001910 |     | 0.00340681136275634                                              | 25.6803571428571          | 0.0871911978409799 |      |
| 2          | 30  | regulation of leukocyte mediated cytotoxicity                    |                           |                    |      |



Stable4\_20PerPair

|                                                              |                                                                                                             |                  |                                          |                  |                   |                   |       |        |       |      |
|--------------------------------------------------------------|-------------------------------------------------------------------------------------------------------------|------------------|------------------------------------------|------------------|-------------------|-------------------|-------|--------|-------|------|
| GO:0016064                                                   | 0.00407240445033978                                                                                         | 10.1858974358974 | 0.322607432011626                        |                  |                   |                   |       |        |       |      |
| 3 111                                                        | immunoglobulin mediated immune response                                                                     |                  |                                          |                  |                   |                   |       |        |       |      |
| GO:0050848                                                   | 0.00411243099306514                                                                                         | 23.1903225806452 | 0.0959103176250778                       |                  |                   |                   |       |        |       |      |
| 2 33                                                         | regulation of calcium-mediated signaling                                                                    |                  |                                          |                  |                   |                   |       |        |       |      |
| GO:0019724                                                   | 0.00438827834974687                                                                                         | 9.90852390852391 | 0.331326551795723                        |                  |                   |                   |       |        |       |      |
| 3 114                                                        | B cell mediated immunity                                                                                    |                  |                                          |                  |                   |                   |       |        |       |      |
| GO:0032655                                                   | 0.00461728111549336                                                                                         | 21.7818181818182 | 0.10172306414781                         |                  |                   |                   |       |        |       |      |
| 2 35                                                         | regulation of interleukin-12 production                                                                     |                  |                                          |                  |                   |                   |       |        |       |      |
| GO:0031341                                                   | 0.00487991712486397                                                                                         | 21.1397058823529 | 0.104629437409176                        |                  |                   |                   |       |        |       |      |
| 2 36                                                         | regulation of cell killing                                                                                  |                  |                                          |                  |                   |                   |       |        |       |      |
| GO:0032615                                                   | 0.00514930741245981                                                                                         | 20.5342857142857 | 0.107535810670542                        |                  |                   |                   |       |        |       |      |
| 2 37                                                         | interleukin-12 production                                                                                   |                  |                                          |                  |                   |                   |       |        |       |      |
| GO:0071345                                                   | 0.00650112841672883                                                                                         | 4.66083078152044 | 1.19451941042142                         |                  |                   |                   |       |        |       |      |
| 5 411                                                        | cellular response to cytokine stimulus                                                                      |                  |                                          |                  |                   |                   |       |        |       |      |
| GO:0002705                                                   | 0.00722085666126351                                                                                         | 17.1035714285714 | 0.127880423500104                        |                  |                   |                   |       |        |       |      |
| 2 44                                                         | positive regulation of leukocyte mediated immunity                                                          |                  |                                          |                  |                   |                   |       |        |       |      |
| GO:0002708                                                   | 0.00722085666126351                                                                                         | 17.1035714285714 | 0.127880423500104                        |                  |                   |                   |       |        |       |      |
| 2 44                                                         | positive regulation of lymphocyte mediated immunity                                                         |                  |                                          |                  |                   |                   |       |        |       |      |
| GO:0010522                                                   | 0.00722085666126351                                                                                         | 17.1035714285714 | 0.127880423500104                        |                  |                   |                   |       |        |       |      |
| 2 44                                                         | regulation of calcium ion transport into cytosol                                                            |                  |                                          |                  |                   |                   |       |        |       |      |
| GO:0051924                                                   | 0.00837453187443606                                                                                         | 7.78396072013093 | 0.418517749636703                        |                  |                   |                   |       |        |       |      |
| 3 144                                                        | regulation of calcium ion transport                                                                         |                  |                                          |                  |                   |                   |       |        |       |      |
| GO:0002291                                                   | 0.00869440324222703                                                                                         | 175.69512195122  | 0.00871911978409799                      |                  |                   |                   |       |        |       |      |
| 3                                                            | T cell activation via T cell receptor contact with antigen bound to MHC molecule on antigen presenting cell |                  | 1                                        |                  |                   |                   |       |        |       |      |
| GO:0016056                                                   | 0.00869440324222703                                                                                         | 175.69512195122  | 0.00871911978409799                      |                  |                   |                   |       |        |       |      |
| 3                                                            | rhodopsin mediated signaling pathway                                                                        |                  | 1                                        |                  |                   |                   |       |        |       |      |
| GO:0031585                                                   | 0.00869440324222703                                                                                         | 175.69512195122  | 0.00871911978409799                      |                  |                   |                   |       |        |       |      |
| 3                                                            | regulation of inositol 1,4,5-trisphosphate-sensitive calcium-release channel activity                       |                  | 1                                        |                  |                   |                   |       |        |       |      |
| GO:0031987                                                   | 0.00869440324222703                                                                                         | 175.69512195122  | 0.00871911978409799                      |                  |                   |                   |       |        |       |      |
| 3                                                            | locomotion involved in locomotory behavior                                                                  |                  | 1                                        |                  |                   |                   |       |        |       |      |
| GO:0038110                                                   | 0.00869440324222703                                                                                         | 175.69512195122  | 0.00871911978409799                      |                  |                   |                   |       |        |       |      |
| 3                                                            | interleukin-2-mediated signaling pathway                                                                    |                  | 1                                        |                  |                   |                   |       |        |       |      |
| GO:0051643                                                   | 0.00869440324222703                                                                                         | 175.69512195122  | 0.00871911978409799                      |                  |                   |                   |       |        |       |      |
| 3                                                            | endoplasmic reticulum localization                                                                          |                  | 1                                        |                  |                   |                   |       |        |       |      |
| GO:0001776                                                   | 0.00889458699134167                                                                                         | 15.2787234042553 | 0.142412289806934                        |                  |                   |                   |       |        |       |      |
| 2 49                                                         | leukocyte homeostasis                                                                                       |                  |                                          |                  |                   |                   |       |        |       |      |
| GO:0046427                                                   | 0.00960811169746031                                                                                         | 14.6530612244898 | 0.148225036329666                        |                  |                   |                   |       |        |       |      |
| 2 51                                                         | positive regulation of JAK-STAT cascade                                                                     |                  |                                          |                  |                   |                   |       |        |       |      |
| Tissue: Skin_Sun_Exposed_Lower_leg=>Thyroid Type: asymmetric |                                                                                                             |                  |                                          |                  |                   |                   |       |        |       |      |
| SourceGene: RP11-293B20.1(ENSG00000260518.1)                 |                                                                                                             |                  |                                          |                  |                   |                   |       |        |       |      |
| TargetGeneSet:                                               | CD53                                                                                                        | FCGR2A           | FCGR3A                                   | RP11             | CD86              | PDE6B             | RHOH  | MOCS2  | GZMA  |      |
| DOCK2                                                        | LY86                                                                                                        | GPSM3            | RP1                                      | DOK2             | FAM203A           | TNFSF8            | MRRF  | AMPD3  | CD3E  | CD3D |
| BIN2                                                         | NCKAP1L                                                                                                     | SELPLG           | LCP1                                     | TRAV21           | SLC7A7            | COR01A            | CFDP1 | CCL4L2 | IKZF3 | TNS4 |
| SKAP1                                                        | ICAM2                                                                                                       | CBX4             | VAV1                                     | CD37             | LAIR1             | C20orf196         | TH1L  | ITGB2  |       |      |
| APOBEC3F                                                     | FAM127A                                                                                                     |                  |                                          |                  |                   |                   |       |        |       |      |
| GOBPID                                                       | Pvalue                                                                                                      | OddsRatio        | ExpCount                                 | Count            | Size              | Term              |       |        |       |      |
| GO:0042110                                                   | 10                                                                                                          | 319              | 2.68668050517739e-09                     | 18.2614886731392 |                   | 0.772610891979794 |       |        |       |      |
|                                                              |                                                                                                             |                  | T cell activation                        |                  |                   |                   |       |        |       |      |
| GO:0046649                                                   | 11                                                                                                          | 433              | 3.35977389149501e-09                     | 15.1988546603476 |                   | 1.04871635180956  |       |        |       |      |
|                                                              |                                                                                                             |                  | lymphocyte activation                    |                  |                   |                   |       |        |       |      |
| GO:0030098                                                   | 8                                                                                                           | 204              | 2.33314803451438e-08                     | 21.4965986394558 |                   | 0.494083454432219 |       |        |       |      |
|                                                              |                                                                                                             |                  | lymphocyte differentiation               |                  |                   |                   |       |        |       |      |
| GO:0030217                                                   | 7                                                                                                           | 156              | 7.78853087415086e-08                     | 23.9379194630872 |                   | 0.377828523977579 |       |        |       |      |
|                                                              |                                                                                                             |                  | T cell differentiation                   |                  |                   |                   |       |        |       |      |
| GO:0002521                                                   | 8                                                                                                           | 302              | 4.77767431944924e-07                     | 14.2323003275384 |                   | 0.731437270777109 |       |        |       |      |
|                                                              |                                                                                                             |                  | leukocyte differentiation                |                  |                   |                   |       |        |       |      |
| GO:0046631                                                   | 5                                                                                                           | 82               | 1.47696702907015e-06                     | 31.0367965367965 |                   | 0.19860217286001  |       |        |       |      |
|                                                              |                                                                                                             |                  | alpha-beta T cell activation             |                  |                   |                   |       |        |       |      |
| GO:0050870                                                   | 171                                                                                                         |                  | 3.07066414450078e-06                     | 17.869592476489  | 0.414158189744654 | 6                 |       |        |       |      |
|                                                              |                                                                                                             |                  | positive regulation of T cell activation |                  |                   |                   |       |        |       |      |
| GO:0051249                                                   |                                                                                                             |                  | 4.31125997728482e-06                     | 12.8079710144928 |                   | 0.685419694138814 |       |        |       |      |

Stable4\_20PerPair

|            |     |                                                                    |                  |                    |   |
|------------|-----|--------------------------------------------------------------------|------------------|--------------------|---|
| 7          | 283 | regulation of lymphocyte activation                                |                  |                    |   |
| GO:0045061 |     | 8.64692470749186e-06                                               | 96.4419642857143 | 0.0411736212026849 |   |
| 3          | 17  | thymic T cell selection                                            |                  |                    |   |
| GO:0002694 |     | 9.84499468954118e-06                                               | 11.2277070063694 | 0.777454847415404  |   |
| 7          | 321 | regulation of leukocyte activation                                 |                  |                    |   |
| GO:0051251 |     | 1.14494044477565e-05                                               | 14.0640158389705 | 0.520725209328074  |   |
| 6          | 215 | positive regulation of lymphocyte activation                       |                  |                    |   |
| GO:0030097 |     | 1.1480459922469e-05                                                | 9.09141229141229 | 1.12137568334371   |   |
| 8          | 463 | hemopoiesis                                                        |                  |                    |   |
| GO:0050863 |     | 1.33916112296405e-05                                               | 13.665757818765  | 0.535257075634904  | 6 |
| 221        |     | regulation of T cell activation                                    |                  |                    |   |
| GO:0050865 |     | 1.51423074279706e-05                                               | 10.4761904761905 | 0.830738357207114  |   |
| 7          | 343 | regulation of cell activation                                      |                  |                    |   |
| GO:0002696 |     | 1.80774351286182e-05                                               | 12.9324016405894 | 0.564320808248564  |   |
| 6          | 233 | positive regulation of leukocyte activation                        |                  |                    |   |
| GO:0048534 |     | 1.86345632831662e-05                                               | 8.4745608031029  | 1.19887897031347   | 8 |
| 495        |     | hemopoietic or lymphoid organ development                          |                  |                    |   |
| GO:0050867 |     | 2.13714392741034e-05                                               | 12.5393457117595 | 0.581274652273199  |   |
| 6          | 240 | positive regulation of cell activation                             |                  |                    |   |
| GO:0050900 |     | 2.18791773820163e-05                                               | 12.4851063829787 | 0.583696629991004  |   |
| 6          | 241 | leukocyte migration                                                |                  |                    |   |
| GO:0045058 |     | 2.54398158559894e-05                                               | 64.2633928571429 | 0.0581274652273199 |   |
| 3          | 24  | T cell selection                                                   |                  |                    |   |
| GO:0031294 |     | 3.10160964812008e-05                                               | 26.0699681962744 | 0.181648328835375  |   |
| 4          | 75  | lymphocyte costimulation                                           |                  |                    |   |
| GO:0031295 |     | 3.10160964812008e-05                                               | 26.0699681962744 | 0.181648328835375  |   |
| 4          | 75  | T cell costimulation                                               |                  |                    |   |
| GO:0046651 |     | 5.47850058892634e-05                                               | 14.2205588822355 | 0.416580167462459  |   |
| 5          | 172 | lymphocyte proliferation                                           |                  |                    |   |
| GO:0032943 |     | 5.78834884852929e-05                                               | 14.0502958579882 | 0.421424122898069  |   |
| 5          | 174 | mononuclear cell proliferation                                     |                  |                    |   |
| GO:0070661 |     | 7.16565160147345e-05                                               | 13.4077212806026 | 0.440799944640509  |   |
| 5          | 182 | leukocyte proliferation                                            |                  |                    |   |
| GO:0043374 |     | 0.000118766137090523                                               | 174.678787878788 | 0.016953844024635  |   |
| 2          | 7   | CD8-positive, alpha-beta T cell differentiation                    |                  |                    |   |
| GO:0046635 |     | 0.000150299917042784                                               | 33.69375         | 0.104145041865615  | 3 |
| 43         |     | positive regulation of alpha-beta T cell activation                |                  |                    |   |
| GO:0045059 |     | 0.000158113906383722                                               | 145.555555555556 | 0.01937582174244   |   |
| 2          | 8   | positive thymic T cell selection                                   |                  |                    |   |
| GO:0042098 |     | 0.000181896641323896                                               | 16.1878890775325 | 0.28579337070099   |   |
| 4          | 118 | T cell proliferation                                               |                  |                    |   |
| GO:0036037 |     | 0.000202980038708031                                               | 124.753246753247 | 0.021797799460245  |   |
| 2          | 9   | CD8-positive, alpha-beta T cell activation                         |                  |                    |   |
| GO:0050851 |     | 0.00021335795684026                                                | 15.5023041474654 | 0.297903259290015  |   |
| 4          | 123 | antigen receptor-mediated signaling pathway                        |                  |                    |   |
| GO:0002757 |     | 0.000237560414639501                                               | 10.2797101449275 | 0.569164763684174  |   |
| 5          | 235 | immune response-activating signal transduction                     |                  |                    |   |
| GO:0002429 |     | 0.000287787005463801                                               | 14.2905726431608 | 0.322123036468065  |   |
| 4          | 133 | immune response-activating cell surface receptor signaling pathway |                  |                    |   |
| GO:0002764 |     | 0.000304705132251831                                               | 9.72085048010974 | 0.600650474015639  |   |
| 5          | 248 | immune response-regulating signaling pathway                       |                  |                    |   |
| GO:0007603 |     | 0.000309165754825163                                               | 97.016835016835  | 0.026641754895855  | 2 |
| 11         |     | phototransduction, visible light                                   |                  |                    |   |
| GO:0043368 |     | 0.000309165754825163                                               | 97.016835016835  | 0.026641754895855  | 2 |
| 11         |     | positive T cell selection                                          |                  |                    |   |
| GO:0045060 |     | 0.000309165754825163                                               | 97.016835016835  | 0.026641754895855  | 2 |
| 11         |     | negative thymic T cell selection                                   |                  |                    |   |
| GO:0046634 |     | 0.000313218738697508                                               | 25.8966346153846 | 0.133208774479275  |   |
| 3          | 55  | regulation of alpha-beta T cell activation                         |                  |                    |   |
| GO:0043383 |     | 0.000370434731468843                                               | 87.3090909090909 | 0.02906373261366   |   |
| 2          | 12  | negative T cell selection                                          |                  |                    |   |
| GO:0002768 |     | 0.000389446373958234                                               | 13.1576036866359 | 0.348764791363919  |   |
| 4          | 144 | immune response-regulating cell surface receptor signaling pathway |                  |                    |   |

Stable4\_20PerPair

|            |                                                                        |                  |                     |
|------------|------------------------------------------------------------------------|------------------|---------------------|
| GO:0050670 | 0.000389446373958234                                                   | 13.1576036866359 | 0.348764791363919   |
| 4 144      | regulation of lymphocyte proliferation                                 |                  |                     |
| GO:0032944 | 0.000399808628339826                                                   | 13.0633722260352 | 0.351186769081724   |
| 4 145      | regulation of mononuclear cell proliferation                           |                  |                     |
| GO:0033077 | 0.000425431799924838                                                   | 23.207974137931  | 0.147740640786105 3 |
| 61         | T cell differentiation in thymus                                       |                  |                     |
| GO:0045086 | 0.000437120856360053                                                   | 79.366391184573  | 0.031485710331465 2 |
| 13         | positive regulation of interleukin-2 biosynthetic process              |                  |                     |
| GO:0070663 | 0.000454602824247297                                                   | 12.6115775519222 | 0.363296657670749   |
| 4 150      | regulation of leukocyte proliferation                                  |                  |                     |
| GO:0046632 | 0.000512923439393237                                                   | 21.7046370967742 | 0.157428551657325   |
| 3 65       | alpha-beta T cell differentiation                                      |                  |                     |
| GO:0042102 | 0.000536458947008329                                                   | 21.358630952381  | 0.15985052937513 3  |
| 66         | positive regulation of T cell proliferation                            |                  |                     |
| GO:0002253 | 0.000715435393470298                                                   | 8.00566893424036 | 0.724171337623694   |
| 5 299      | activation of immune response                                          |                  |                     |
| GO:0043372 | 0.000757536233832414                                                   | 58.1858585858586 | 0.0411736212026849  |
| 2 17       | positive regulation of CD4-positive, alpha-beta T cell differentiation |                  |                     |
| GO:0045577 | 0.000757536233832414                                                   | 58.1858585858586 | 0.0411736212026849  |
| 2 17       | regulation of B cell differentiation                                   |                  |                     |
| GO:0045076 | 0.000949598362949957                                                   | 51.3333333333333 | 0.0460175766382949  |
| 2 19       | regulation of interleukin-2 biosynthetic process                       |                  |                     |
| GO:2000516 | 0.000949598362949957                                                   | 51.3333333333333 | 0.0460175766382949  |
| 2 19       | positive regulation of CD4-positive, alpha-beta T cell activation      |                  |                     |
| GO:0009584 | 0.00105350659720668                                                    | 48.4781144781145 | 0.0484395543560999  |
| 2 20       | detection of visible light                                             |                  |                     |
| GO:0007596 | 0.00112639128863686                                                    | 5.85534062237174 | 1.20614490346689    |
| 6 498      | blood coagulation                                                      |                  |                     |
| GO:0006909 | 0.00116068996689376                                                    | 16.1893825301205 | 0.20829008373123    |
| 3 86       | phagocytosis                                                           |                  |                     |
| GO:0042094 | 0.00116263356851686                                                    | 45.9234449760766 | 0.0508615320739049  |
| 2 21       | interleukin-2 biosynthetic process                                     |                  |                     |
| GO:0046633 | 0.00116263356851686                                                    | 45.9234449760766 | 0.0508615320739049  |
| 2 21       | alpha-beta T cell proliferation                                        |                  |                     |
| GO:0002697 | 0.00135700176970707                                                    | 9.31324709349926 | 0.486817521278804   |
| 4 201      | regulation of immune effector process                                  |                  |                     |
| GO:0032673 | 0.00139644608680904                                                    | 41.5440115440115 | 0.0557054875095149  |
| 2 23       | regulation of interleukin-4 production                                 |                  |                     |
| GO:0043029 | 0.00139644608680904                                                    | 41.5440115440115 | 0.0557054875095149  |
| 2 23       | T cell homeostasis                                                     |                  |                     |
| GO:0050671 | 0.00159389247516337                                                    | 14.4385080645161 | 0.23250986090928    |
| 3 96       | positive regulation of lymphocyte proliferation                        |                  |                     |
| GO:0032946 | 0.00164204411823343                                                    | 14.2839095744681 | 0.234931838627085   |
| 3 97       | positive regulation of mononuclear cell proliferation                  |                  |                     |
| GO:0009167 | 0.00165084146432016                                                    | 37.9262187088274 | 0.0605494429451249  |
| 2 25       | purine ribonucleoside monophosphate metabolic process                  |                  |                     |
| GO:0050778 | 0.00171932957720419                                                    | 6.52599814298979 | 0.881599889281019   |
| 5 364      | positive regulation of immune response                                 |                  |                     |
| GO:0008360 | 0.00174106597559996                                                    | 13.984375        | 0.239775794062695 3 |
| 99         | regulation of cell shape                                               |                  |                     |
| GO:0045619 | 0.00174106597559996                                                    | 13.984375        | 0.239775794062695 3 |
| 99         | regulation of lymphocyte differentiation                               |                  |                     |
| GO:0050852 | 0.00174106597559996                                                    | 13.984375        | 0.239775794062695 3 |
| 99         | T cell receptor signaling pathway                                      |                  |                     |
| GO:0009126 | 0.00178569731497192                                                    | 36.3434343434343 | 0.0629714206629299  |
| 2 26       | purine nucleoside monophosphate metabolic process                      |                  |                     |
| GO:0070665 | 0.00179194860229972                                                    | 13.8392396907216 | 0.2421977717805 3   |
| 100        | positive regulation of leukocyte proliferation                         |                  |                     |
| GO:0042129 | 0.00184375387589325                                                    | 13.6970663265306 | 0.244619749498305   |
| 3 101      | regulation of T cell proliferation                                     |                  |                     |
| GO:0032633 | 0.00192562655023593                                                    | 34.8872727272727 | 0.0653933983807349  |
| 2 27       | interleukin-4 production                                               |                  |                     |

Stable4\_20PerPair

|            |                     |                                                               |                     |
|------------|---------------------|---------------------------------------------------------------|---------------------|
| GO:0043370 | 0.00192562655023593 | 34.8872727272727                                              | 0.0653933983807349  |
| 2          | 27                  | regulation of CD4-positive, alpha-beta T cell differentiation |                     |
| GO:2000514 | 0.00222060948894769 | 32.2985409652076                                              | 0.0702373538163449  |
| 2          | 29                  | regulation of CD4-positive, alpha-beta T cell activation      |                     |
| GO:0002252 | 0.00222277992826332 | 6.13954505686789                                              | 0.934883399072729   |
| 5          | 386                 | immune effector process                                       |                     |
| GO:0046638 | 0.00237561555054854 | 31.1428571428571                                              | 0.0726593315341499  |
| 2          | 30                  | positive regulation of alpha-beta T cell differentiation      |                     |
| GO:0030595 | 0.00241385960743403 | 12.4201388888889                                              | 0.268839526676355   |
| 3          | 111                 | leukocyte chemotaxis                                          |                     |
| GO:0051607 | 0.00253953689296051 | 12.1926136363636                                              | 0.273683482111965   |
| 3          | 113                 | defense response to virus                                     |                     |
| GO:0030838 | 0.00270053835413189 | 29.0626262626263                                              | 0.0775032869697599  |
| 2          | 32                  | positive regulation of actin filament polymerization          |                     |
| GO:0007602 | 0.00287040793370604 | 28.1231671554252                                              | 0.0799252646875649  |
| 2          | 33                  | phototransduction                                             |                     |
| GO:0007159 | 0.00359872757580016 | 24.9021645021645                                              | 0.0896131755587849  |
| 2          | 37                  | leukocyte cell-cell adhesion                                  |                     |
| GO:0009161 | 0.0039918667573981  | 23.5528255528256                                              | 0.0944571309943949  |
| 2          | 39                  | ribonucleoside monophosphate metabolic process                |                     |
| GO:0032663 | 0.0039918667573981  | 23.5528255528256                                              | 0.0944571309943949  |
| 2          | 39                  | regulation of interleukin-2 production                        |                     |
| GO:0002260 | 0.00419560037852698 | 22.9314194577352                                              | 0.0968791087121998  |
| 2          | 40                  | lymphocyte homeostasis                                        |                     |
| GO:0009583 | 0.00419560037852698 | 22.9314194577352                                              | 0.0968791087121998  |
| 2          | 40                  | detection of light stimulus                                   |                     |
| GO:0046637 | 0.00419560037852698 | 22.9314194577352                                              | 0.0968791087121998  |
| 2          | 40                  | regulation of alpha-beta T cell differentiation               |                     |
| GO:0060326 | 0.00428179556092064 | 10.0679041353383                                              | 0.329388969621479   |
| 3          | 136                 | cell chemotaxis                                               |                     |
| GO:0043367 | 0.00440407944310129 | 22.3418803418803                                              | 0.0993010864300048  |
| 2          | 41                  | CD4-positive, alpha-beta T cell differentiation               |                     |
| GO:0035710 | 0.004835182637369   | 21.2490761271249                                              | 0.104145041865615   |
| 2          | 43                  | CD4-positive, alpha-beta T cell activation                    |                     |
| GO:0030593 | 0.00505776132746409 | 20.7417027417027                                              | 0.10656701958342    |
| 2          | 44                  | neutrophil chemotaxis                                         |                     |
| GO:0032623 | 0.00505776132746409 | 20.7417027417027                                              | 0.10656701958342    |
| 2          | 44                  | interleukin-2 production                                      |                     |
| GO:0032273 | 0.00528499458136162 | 20.2579281183932                                              | 0.108988997301225   |
| 2          | 45                  | positive regulation of protein polymerization                 |                     |
| GO:0002286 | 0.00551685987126941 | 19.7961432506887                                              | 0.11141097501903    |
| 2          | 46                  | T cell activation involved in immune response                 |                     |
| GO:0009123 | 0.00551685987126941 | 19.7961432506887                                              | 0.11141097501903    |
| 2          | 46                  | nucleoside monophosphate metabolic process                    |                     |
| GO:0042113 | 0.00594279085236457 | 8.91625                                                       | 0.370562590824164   |
| 3          | 153                 | B cell activation                                             |                     |
| GO:0001776 | 0.00624002382385215 | 18.528691166989                                               | 0.118676908172445   |
| 49         | 2                   | leukocyte homeostasis                                         |                     |
| GO:0030888 | 0.00649019350462653 | 18.1414141414141                                              | 0.12109888589025    |
| 2          | 50                  | regulation of B cell proliferation                            |                     |
| GO:0001766 | 0.00724884985550822 | 211.970588235294                                              | 0.00726593315341499 |
| 1          | 3                   | membrane raft polarization                                    |                     |
| GO:0002669 | 0.00724884985550822 | 211.970588235294                                              | 0.00726593315341499 |
| 1          | 3                   | positive regulation of T cell anergy                          |                     |
| GO:0002913 | 0.00724884985550822 | 211.970588235294                                              | 0.00726593315341499 |
| 1          | 3                   | positive regulation of lymphocyte anergy                      |                     |
| GO:0006922 | 0.00724884985550822 | 211.970588235294                                              | 0.00726593315341499 |
| 1          | 3                   | cleavage of lamin                                             |                     |
| GO:0009158 | 0.00724884985550822 | 211.970588235294                                              | 0.00726593315341499 |
| 1          | 3                   | ribonucleoside monophosphate catabolic process                |                     |
| GO:0009169 | 0.00724884985550822 | 211.970588235294                                              | 0.00726593315341499 |
| 1          | 3                   | purine ribonucleoside monophosphate catabolic process         |                     |
| GO:0031580 | 0.00724884985550822 | 211.970588235294                                              | 0.00726593315341499 |

Stable4\_20PerPair

|            |    |                                                           |                  |                     |
|------------|----|-----------------------------------------------------------|------------------|---------------------|
| 1          | 3  | membrane raft distribution                                |                  |                     |
| GO:0032071 |    | 0.00724884985550822                                       | 211.970588235294 | 0.00726593315341499 |
| 1          | 3  | regulation of endodeoxyribonuclease activity              |                  |                     |
| GO:0032641 |    | 0.00724884985550822                                       | 211.970588235294 | 0.00726593315341499 |
| 1          | 3  | lymphotoxin A production                                  |                  |                     |
| GO:0032790 |    | 0.00724884985550822                                       | 211.970588235294 | 0.00726593315341499 |
| 1          | 3  | ribosome disassembly                                      |                  |                     |
| GO:0035507 |    | 0.00724884985550822                                       | 211.970588235294 | 0.00726593315341499 |
| 1          | 3  | regulation of myosin-light-chain-phosphatase activity     |                  |                     |
| GO:0035845 |    | 0.00724884985550822                                       | 211.970588235294 | 0.00726593315341499 |
| 1          | 3  | photoreceptor cell outer segment organization             |                  |                     |
| GO:0042109 |    | 0.00724884985550822                                       | 211.970588235294 | 0.00726593315341499 |
| 1          | 3  | lymphotoxin A biosynthetic process                        |                  |                     |
| GO:0045404 |    | 0.00724884985550822                                       | 211.970588235294 | 0.00726593315341499 |
| 1          | 3  | positive regulation of interleukin-4 biosynthetic process |                  |                     |
| GO:0060099 |    | 0.00724884985550822                                       | 211.970588235294 | 0.00726593315341499 |
| 1          | 3  | regulation of phagocytosis, engulfment                    |                  |                     |
| GO:0060100 |    | 0.00724884985550822                                       | 211.970588235294 | 0.00726593315341499 |
| 1          | 3  | positive regulation of phagocytosis, engulfment           |                  |                     |
| GO:0045582 |    | 0.0072677375634005                                        | 17.0707070707071 | 0.128364819043665   |
| 2          | 53 | positive regulation of T cell differentiation             |                  |                     |
| GO:0042100 |    | 0.00836672552680524                                       | 15.8247933884298 | 0.138052729914885   |
| 2          | 57 | B cell proliferation                                      |                  |                     |
| GO:0050688 |    | 0.00836672552680524                                       | 15.8247933884298 | 0.138052729914885   |
| 2          | 57 | regulation of defense response to virus                   |                  |                     |
| GO:0042108 |    | 0.00894251186372708                                       | 15.2674109516215 | 0.142896685350495   |
| 2          | 59 | positive regulation of cytokine biosynthetic process      |                  |                     |
| GO:0001771 |    | 0.00965377027737002                                       | 141.303921568627 | 0.00968791087121998 |
| 1          | 4  | immunological synapse formation                           |                  |                     |
| GO:0002249 |    | 0.00965377027737002                                       | 141.303921568627 | 0.00968791087121998 |
| 1          | 4  | lymphocyte anergy                                         |                  |                     |
| GO:0002667 |    | 0.00965377027737002                                       | 141.303921568627 | 0.00968791087121998 |
| 1          | 4  | regulation of T cell anergy                               |                  |                     |
| GO:0002870 |    | 0.00965377027737002                                       | 141.303921568627 | 0.00968791087121998 |
| 1          | 4  | T cell anergy                                             |                  |                     |
| GO:0002911 |    | 0.00965377027737002                                       | 141.303921568627 | 0.00968791087121998 |
| 1          | 4  | regulation of lymphocyte anergy                           |                  |                     |
| GO:0006923 |    | 0.00965377027737002                                       | 141.303921568627 | 0.00968791087121998 |
| 1          | 4  | cleavage of cytoskeletal proteins involved in apoptosis   |                  |                     |
| GO:0009128 |    | 0.00965377027737002                                       | 141.303921568627 | 0.00968791087121998 |
| 1          | 4  | purine nucleoside monophosphate catabolic process         |                  |                     |
| GO:0032070 |    | 0.00965377027737002                                       | 141.303921568627 | 0.00968791087121998 |
| 1          | 4  | regulation of deoxyribonuclease activity                  |                  |                     |
| GO:0032264 |    | 0.00965377027737002                                       | 141.303921568627 | 0.00968791087121998 |
| 1          | 4  | IMP salvage                                               |                  |                     |
| GO:0042097 |    | 0.00965377027737002                                       | 141.303921568627 | 0.00968791087121998 |
| 1          | 4  | interleukin-4 biosynthetic process                        |                  |                     |
| GO:0045402 |    | 0.00965377027737002                                       | 141.303921568627 | 0.00968791087121998 |
| 1          | 4  | regulation of interleukin-4 biosynthetic process          |                  |                     |
| GO:0051665 |    | 0.00965377027737002                                       | 141.303921568627 | 0.00968791087121998 |
| 1          | 4  | membrane raft localization                                |                  |                     |
| GO:2001185 |    | 0.00965377027737002                                       | 141.303921568627 | 0.00968791087121998 |
| 1          | 4  | regulation of CD8-positive, alpha-beta T cell activation  |                  |                     |
| GO:0045621 |    | 0.00983857231101985                                       | 14.5010101010101 | 0.15016261850391    |
| 2          | 62 | positive regulation of lymphocyte differentiation         |                  |                     |

Tissue: Skin\_Sun  
 SourceGene: RP11-320N21.1(ENSG00000245080.3)  
 TargetGeneSet: NOC2L KIAA0090 PSMB2 CYB5RL MRPL37 CCDC76 AMY2A  
 SEC22B PIAS3 RUSC1-AS1 METTL13 HEATR1 RNASEH1 CCT7 C2orf55 TMEM177 RP11  
 ATG7 XYLB U4 RUVBL1 PSMD2 LMLN CRMP1 CNGA1 CCT5 NHP2  
 ZSCAN23 ZNRD1-AS1 ATAT1 AARS2 BEND6 PLEKHA8 IGFBP1 COPS6 FAM115B GS1  
 EXOSC4 TUB RPS6KA4 DLAT DCPS COPS7A TAS2R20 PFKM NUP37 PSMB5  
 RPAP1 PKM2 CCDC113 DPH1 PSMB6 TP53 PFAS ZNF29P ERAL1 PSMD11 LIG3

Stable4\_20PerPair

| PSMB3      | TUBG1  | PHB       | C19orf55                                                                                        | PSMD8            | GRWD1             | RUVBL2 | CBR1 | PISD              |  |
|------------|--------|-----------|-------------------------------------------------------------------------------------------------|------------------|-------------------|--------|------|-------------------|--|
| XRCC6      | ATXN10 | POLA1     | APEX2                                                                                           | PGK1             | G6PD              |        |      |                   |  |
| GOBPID     | Pvalue | OddsRatio | ExpCount                                                                                        | Count            | Size              | Term   |      |                   |  |
| GO:0006977 | 8      | 66        | 1.69180334633732e-10                                                                            | 40.3546798029557 |                   |        |      | 0.260328004982354 |  |
|            |        |           | DNA damage response, signal transduction by p53 class mediator resulting in cell cycle arrest   |                  |                   |        |      |                   |  |
| GO:0072413 | 8      | 66        | 1.69180334633732e-10                                                                            | 40.3546798029557 |                   |        |      | 0.260328004982354 |  |
|            |        |           | signal transduction involved in mitotic cell cycle checkpoint                                   |                  |                   |        |      |                   |  |
| GO:0072431 | 8      | 66        | 1.69180334633732e-10                                                                            | 40.3546798029557 |                   |        |      | 0.260328004982354 |  |
|            |        |           | signal transduction involved in mitotic cell cycle G1/S transition DNA damage checkpoint        |                  |                   |        |      |                   |  |
| GO:0072474 | 8      | 66        | 1.69180334633732e-10                                                                            | 40.3546798029557 |                   |        |      | 0.260328004982354 |  |
|            |        |           | signal transduction involved in mitotic cell cycle G1/S transition checkpoint                   |                  |                   |        |      |                   |  |
| GO:0072401 | 8      | 67        | 1.91539867176746e-10                                                                            | 39.6679349705984 |                   |        |      | 0.264272368694208 |  |
|            |        |           | signal transduction involved in DNA integrity checkpoint                                        |                  |                   |        |      |                   |  |
| GO:0072404 | 8      | 67        | 1.91539867176746e-10                                                                            | 39.6679349705984 |                   |        |      | 0.264272368694208 |  |
|            |        |           | signal transduction involved in G1/S transition checkpoint                                      |                  |                   |        |      |                   |  |
| GO:0072422 | 8      | 67        | 1.91539867176746e-10                                                                            | 39.6679349705984 |                   |        |      | 0.264272368694208 |  |
|            |        |           | signal transduction involved in DNA damage checkpoint                                           |                  |                   |        |      |                   |  |
| GO:0072395 | 8      | 68        | 2.16422956295763e-10                                                                            | 39.0040816326531 |                   |        |      | 0.268216732406062 |  |
|            |        |           | signal transduction involved in cell cycle checkpoint                                           |                  |                   |        |      |                   |  |
| GO:0031571 | 8      | 73        | 3.87650819970675e-10                                                                            | 35.9912087912088 |                   |        |      | 0.287938550965331 |  |
|            |        |           | mitotic cell cycle G1/S transition DNA damage checkpoint                                        |                  |                   |        |      |                   |  |
| GO:0000216 | 8      | 79        | 7.38828971619158e-10                                                                            | 32.9359011210118 |                   |        |      | 0.311604733236454 |  |
|            |        |           | M/G1 transition of mitotic cell cycle                                                           |                  |                   |        |      |                   |  |
| GO:0071158 | 8      | 80        | 8.18441281880951e-10                                                                            | 32.4761904761905 |                   |        |      | 0.315549096948308 |  |
|            |        |           | positive regulation of cell cycle arrest                                                        |                  |                   |        |      |                   |  |
| GO:0031575 | 8      | 82        | 1.00023942202098e-09                                                                            | 31.5940430226144 |                   |        |      | 0.323437824372016 |  |
|            |        |           | mitotic cell cycle G1/S transition checkpoint                                                   |                  |                   |        |      |                   |  |
| GO:0071779 | 8      | 86        | 1.47116870827763e-09                                                                            | 29.9654631083203 |                   |        |      | 0.339215279219431 |  |
|            |        |           | G1/S transition checkpoint                                                                      |                  |                   |        |      |                   |  |
| GO:0006521 |        |           | 2.30334928262346e-09                                                                            | 40.1632          | 0.22482873157567  |        | 7    | 57                |  |
|            |        |           | regulation of cellular amino acid metabolic process                                             |                  |                   |        |      |                   |  |
| GO:2000045 | 8      | 99        | 4.56365470640182e-09                                                                            | 25.6613590491142 |                   |        |      | 0.390492007473531 |  |
|            |        |           | regulation of G1/S transition of mitotic cell cycle                                             |                  |                   |        |      |                   |  |
| GO:0051436 |        |           | 7.34990694493526e-09                                                                            | 33.446           | 0.264272368694208 |        | 7    | 67                |  |
|            |        |           | negative regulation of ubiquitin-protein ligase activity involved in mitotic cell cycle         |                  |                   |        |      |                   |  |
| GO:0033238 | 7      | 72        | 1.22625579913569e-08                                                                            | 30.8624615384615 |                   |        |      | 0.283994187253477 |  |
|            |        |           | regulation of cellular amine metabolic process                                                  |                  |                   |        |      |                   |  |
| GO:0051352 | 7      | 72        | 1.22625579913569e-08                                                                            | 30.8624615384615 |                   |        |      | 0.283994187253477 |  |
|            |        |           | negative regulation of ligase activity                                                          |                  |                   |        |      |                   |  |
| GO:0051437 | 7      | 72        | 1.22625579913569e-08                                                                            | 30.8624615384615 |                   |        |      | 0.283994187253477 |  |
|            |        |           | positive regulation of ubiquitin-protein ligase activity involved in mitotic cell cycle         |                  |                   |        |      |                   |  |
| GO:0051444 | 7      | 72        | 1.22625579913569e-08                                                                            | 30.8624615384615 |                   |        |      | 0.283994187253477 |  |
|            |        |           | negative regulation of ubiquitin-protein ligase activity                                        |                  |                   |        |      |                   |  |
| GO:0002479 | 7      | 75        | 1.63724525491548e-08                                                                            | 29.4947058823529 |                   |        |      | 0.295827278389039 |  |
|            |        |           | antigen processing and presentation of exogenous peptide antigen via MHC class I, TAP-dependent |                  |                   |        |      |                   |  |
| GO:0030330 | 8      | 117       | 1.7213929464672e-08                                                                             | 21.3967421831118 |                   |        |      | 0.461490554286901 |  |
|            |        |           | DNA damage response, signal transduction by p53 class mediator                                  |                  |                   |        |      |                   |  |
| GO:0051439 | 78     |           | 2.1594916278439e-08                                                                             | 28.2425352112676 |                   |        |      | 0.3076603695246 7 |  |
|            |        |           | regulation of ubiquitin-protein ligase activity involved in mitotic cell cycle                  |                  |                   |        |      |                   |  |
| GO:0042590 | 7      | 79        | 2.36225914332687e-08                                                                            | 27.8483333333333 |                   |        |      | 0.311604733236454 |  |
|            |        |           | antigen processing and presentation of exogenous peptide antigen via MHC class I                |                  |                   |        |      |                   |  |
| GO:0072331 | 8      | 123       | 2.55290897424942e-08                                                                            | 20.2718722271517 |                   |        |      | 0.485156736558024 |  |
|            |        |           | signal transduction by p53 class mediator                                                       |                  |                   |        |      |                   |  |
| GO:0051443 |        |           | 3.07004488772205e-08                                                                            | 26.7288          | 0.323437824372016 |        | 7    | 82                |  |
|            |        |           | positive regulation of ubiquitin-protein ligase activity                                        |                  |                   |        |      |                   |  |
| GO:0002478 |        |           | 3.34264755705798e-08                                                                            | 26.3752631578947 |                   |        |      | 0.32738218808387  |  |

Stable4\_20PerPair

|            |     |                                                                                                |                          |                   |    |
|------------|-----|------------------------------------------------------------------------------------------------|--------------------------|-------------------|----|
| 7          | 83  | antigen processing and presentation of exogenous peptide antigen                               |                          |                   |    |
| GO:0031145 |     | 3.34264755705798e-08                                                                           | 26.3752631578947         | 0.32738218808387  |    |
| 7          | 83  | anaphase-promoting complex-dependent proteasomal ubiquitin-dependent protein catabolic process |                          |                   |    |
| GO:0000077 |     | 3.94165223336479e-08                                                                           | 19.0993643358983         | 0.512767282541001 |    |
| 8          | 130 | DNA damage checkpoint                                                                          |                          |                   |    |
| GO:0019884 |     | 3.94971858815973e-08                                                                           | 25.6953846153846         | 0.335270915507577 |    |
| 7          | 85  | antigen processing and presentation of exogenous antigen                                       |                          |                   |    |
| GO:0000082 |     | 4.22080493396771e-08                                                                           | 15.0603813559322         | 0.733651650404816 |    |
| 9          | 186 | G1/S transition of mitotic cell cycle                                                          |                          |                   |    |
| GO:0051351 |     | 4.28665798083472e-08                                                                           | 25.3683544303797         | 0.339215279219431 |    |
| 7          | 86  | positive regulation of ligase activity                                                         |                          |                   |    |
| GO:0000084 |     | 4.99586841258498e-08                                                                           | 18.4878522837706         | 0.528544737388416 |    |
| 8          | 134 | S phase of mitotic cell cycle                                                                  |                          |                   |    |
| GO:0031570 |     | 5.60840019695119e-08                                                                           | 18.1964285714286         | 0.536433464812124 |    |
| 8          | 136 | DNA integrity checkpoint                                                                       |                          |                   |    |
| GO:0007093 |     | 6.64817448853105e-08                                                                           | 17.7759775665992         | 0.548266555947685 |    |
| 8          | 139 | mitotic cell cycle checkpoint                                                                  |                          |                   |    |
| GO:0031397 |     | 6.86285717730111e-08                                                                           | 23.5677647058824         | 0.362881461490554 |    |
| 7          | 92  | negative regulation of protein ubiquitination                                                  |                          |                   |    |
| GO:0042770 |     | 7.02976646102498e-08                                                                           | 17.6400742115028         | 0.552210919659539 |    |
| 8          | 140 | signal transduction in response to DNA damage                                                  |                          |                   |    |
| GO:0051320 |     | 8.28985944607622e-08                                                                           | 17.2444444444444         | 0.564044010795101 |    |
| 8          | 143 | S phase                                                                                        |                          |                   |    |
| GO:0051438 |     | 9.22454663005284e-08                                                                           | 22.5022471910112         | 0.37865891633797  |    |
| 7          | 96  | regulation of ubiquitin-protein ligase activity                                                |                          |                   |    |
| GO:2000602 |     | 1.02690770372898e-07                                                                           | 16.7435031566583         | 0.579821465642516 |    |
| 8          | 147 | regulation of interphase of mitotic cell cycle                                                 |                          |                   |    |
| GO:0002474 |     | 1.14169414322057e-07                                                                           | 21.7639130434783         | 0.390492007473531 |    |
| 7          | 99  | antigen processing and presentation of peptide antigen via MHC class I                         |                          |                   |    |
| GO:0051340 |     | 1.2239056893103e-07                                                                            | 21.5283870967742         | 0.394436371185385 |    |
| 7          | 100 | regulation of ligase activity                                                                  |                          |                   |    |
| GO:0090068 |     | 1.26419058489461e-07                                                                           | 16.2705865563008         | 0.595598920489931 |    |
| 8          | 151 | positive regulation of cell cycle process                                                      |                          |                   |    |
| GO:0010565 |     | 1.47176005622437e-07                                                                           | 15.9329046687168         | 0.607432011625493 |    |
| 8          | 154 | regulation of cellular ketone metabolic process                                                |                          |                   |    |
| GO:0048002 |     | 2.0807229048262e-07                                                                            | 19.8120792079208         | 0.425991280880216 |    |
| 7          | 108 | antigen processing and presentation of peptide antigen                                         |                          |                   |    |
| GO:0051329 |     | 2.18365624736862e-07                                                                           | 9.11424858223062         | 1.49491384679261  |    |
| 11         | 379 | interphase of mitotic cell cycle                                                               |                          |                   |    |
| GO:0051325 |     | 2.69142243053328e-07                                                                           | 8.91524051803885         | 1.52646875648744  |    |
| 11         | 387 | interphase                                                                                     |                          |                   |    |
| GO:0031396 |     | 2.87416013552962e-07                                                                           | 14.5244897959184         | 0.662653103591447 |    |
| 8          | 168 | regulation of protein ubiquitination                                                           |                          |                   |    |
| GO:0031398 |     | 6.29410745103251e-07                                                                           | 16.653 0.500934191405439 | 7 127             |    |
| 437        |     | positive regulation of protein ubiquitination                                                  |                          |                   |    |
| GO:0006520 |     | 8.97584506929342e-07                                                                           | 7.8407838334354          | 1.72368694208013  | 11 |
| 6          | 94  | cellular amino acid metabolic process                                                          |                          |                   |    |
| GO:0046365 |     | 1.79097767566084e-06                                                                           | 19.1256684491979         | 0.370770188914262 |    |
| 7          | 152 | monosaccharide catabolic process                                                               |                          |                   |    |
| GO:0019882 |     | 2.11068667280847e-06                                                                           | 13.7576551724138         | 0.599543284201785 |    |
| 9          | 300 | antigen processing and presentation                                                            |                          |                   |    |
| GO:0031400 |     | 2.38366102018076e-06                                                                           | 9.08698453608247         | 1.18330911355616  |    |
| 7          | 158 | negative regulation of protein modification process                                            |                          |                   |    |
| GO:0016052 |     | 2.73240688138478e-06                                                                           | 13.2054304635762         | 0.623209466472908 |    |
| 7          | 161 | carbohydrate catabolic process                                                                 |                          |                   |    |
| GO:0000209 |     | 3.09651986475303e-06                                                                           | 12.9454545454545         | 0.63504255760847  |    |
| 8          | 242 | protein polyubiquitination                                                                     |                          |                   |    |
| GO:0000075 |     | 4.48521167920036e-06                                                                           | 9.87964416535845         | 0.954536018268632 |    |
| 7          | 183 | cell cycle checkpoint                                                                          |                          |                   |    |
| GO:0044106 |     | 7.21446604962585e-06                                                                           | 11.3097727272727         | 0.721818559269255 |    |
| 7          | 183 | cellular amine metabolic process                                                               |                          |                   |    |

Stable4\_20PerPair

|            |                                                            |                  |                    |   |    |
|------------|------------------------------------------------------------|------------------|--------------------|---|----|
| GO:0071156 | 8.49875948306201e-06                                       | 9.01658163265306 | 1.04131201992942   |   |    |
| 8 264      | regulation of cell cycle arrest                            |                  |                    |   |    |
| GO:0016032 | 9.19777860880485e-06                                       | 6.73179910261977 | 1.77890803404609   |   |    |
| 10 451     | viral reproduction                                         |                  |                    |   |    |
| GO:0006007 | 1.11607128859528e-05                                       | 19.6758241758242 | 0.295827278389039  |   |    |
| 5 75       | glucose catabolic process                                  |                  |                    |   |    |
| GO:0009308 | 1.37475198092014e-05                                       | 10.1941538461538 | 0.796761469794478  |   |    |
| 7 202      | amine metabolic process                                    |                  |                    |   |    |
| GO:0032269 | 1.54541541720387e-05                                       | 7.1265243902439  | 1.49096948308076   | 9 |    |
| 378        | negative regulation of cellular protein metabolic process  |                  |                    |   |    |
| GO:0043161 | 1.71432678751984e-05                                       | 9.8360396039604  | 0.824372015777455  | 7 |    |
| 209        | proteasomal ubiquitin-dependent protein catabolic process  |                  |                    |   |    |
| GO:0010498 | 2.12055317973677e-05                                       | 9.50191387559809 | 0.851982561760432  |   |    |
| 7 216      | proteasomal protein catabolic process                      |                  |                    |   |    |
| GO:0007346 | 2.30488984137643e-05                                       | 7.80297474922172 | 1.19514220469172   |   |    |
| 8 303      | regulation of mitotic cell cycle                           |                  |                    |   |    |
| GO:0019320 | 2.71701511188135e-05                                       | 16.1866515837104 | 0.354992734066847  |   |    |
| 5 90       | hexose catabolic process                                   |                  |                    |   |    |
| GO:0051248 | 3.54646841588079e-05                                       | 6.37910583941606 | 1.65663275897862   |   |    |
| 9 420      | negative regulation of protein metabolic process           |                  |                    |   |    |
| GO:0007050 | 9.27819170873055e-05                                       | 6.3465430493527  | 1.45547020967407   | 8 |    |
| 369        | cell cycle arrest                                          |                  |                    |   |    |
| GO:0006096 | 0.000102335888881641                                       | 18.6545217957059 | 0.244550550134939  |   |    |
| 4 62       | glycolysis                                                 |                  |                    |   |    |
| GO:0034644 | 0.000159123490207166                                       | 33.2638888888889 | 0.106497820220054  |   |    |
| 3 27       | cellular response to UV                                    |                  |                    |   |    |
| GO:0006310 | 0.000167194038994796                                       | 8.22428281657491 | 0.824372015777455  |   |    |
| 6 209      | DNA recombination                                          |                  |                    |   |    |
| GO:0010564 | 0.000204841947669952                                       | 5.625012566603   | 1.63296657670749   | 8 |    |
| 414        | regulation of cell cycle process                           |                  |                    |   |    |
| GO:0071482 | 0.000266082225714309                                       | 27.5191570881226 | 0.126219638779323  |   |    |
| 3 32       | cellular response to light stimulus                        |                  |                    |   |    |
| GO:0032392 | 0.000291873188185559                                       | 26.6             | 0.130164002491177  | 3 | 33 |
|            | DNA geometric change                                       |                  |                    |   |    |
| GO:0045786 | 0.000295410128982287                                       | 5.31468531468532 | 1.72368694208013   |   |    |
| 8 437      | negative regulation of cell cycle                          |                  |                    |   |    |
| GO:0006273 | 0.000421539838176437                                       | 87.2             | 0.0315549096948308 | 2 | 8  |
|            | lagging strand elongation                                  |                  |                    |   |    |
| GO:0005996 | 0.000486257574063144                                       | 6.68320340184266 | 1.00581274652273   |   |    |
| 6 255      | monosaccharide metabolic process                           |                  |                    |   |    |
| GO:0000338 | 0.000540606632178134                                       | 74.7376623376623 | 0.0354992734066847 |   |    |
| 2 9        | protein deneddylation                                      |                  |                    |   |    |
| GO:0010388 | 0.000540606632178134                                       | 74.7376623376623 | 0.0354992734066847 |   |    |
| 2 9        | cullin deneddylation                                       |                  |                    |   |    |
| GO:0006511 | 0.000543259288114523                                       | 5.50470588235294 | 1.4357483911148    | 7 |    |
| 364        | ubiquitin-dependent protein catabolic process              |                  |                    |   |    |
| GO:0016570 | 0.000549774824252818                                       | 6.52318339100346 | 1.02947892879386   |   |    |
| 6 261      | histone modification                                       |                  |                    |   |    |
| GO:0019941 | 0.000608344237296959                                       | 5.39615384615385 | 1.46335893709778   |   |    |
| 7 371      | modification-dependent protein catabolic process           |                  |                    |   |    |
| GO:0016569 | 0.000619583299297766                                       | 6.37052062204192 | 1.05314511106498   |   |    |
| 6 267      | covalent chromatin modification                            |                  |                    |   |    |
| GO:0043632 | 0.000638074129706616                                       | 5.35089918256131 | 1.47519202823334   |   |    |
| 7 374      | modification-dependent macromolecule catabolic process     |                  |                    |   |    |
| GO:0006266 | 0.000674046648170741                                       | 65.3909090909091 | 0.0394436371185385 |   |    |
| 2 10       | DNA ligation                                               |                  |                    |   |    |
| GO:0030163 | 0.000676079825851976                                       | 4.66228051795667 | 1.95246003736766   |   |    |
| 8 495      | protein catabolic process                                  |                  |                    |   |    |
| GO:0006281 | 0.000734270793197293                                       | 5.21946808510638 | 1.51069130164002   |   |    |
| 7 383      | DNA repair                                                 |                  |                    |   |    |
| GO:0051603 | 0.000804563710224911                                       | 5.13528795811518 | 1.53435748391115   |   |    |
| 7 389      | proteolysis involved in cellular protein catabolic process |                  |                    |   |    |
| GO:0016573 | 0.000859442933124756                                       | 10.3701015965167 | 0.425991280880216  |   |    |



STable4\_20PerPair

|            |     |                                                                                                     |                  |                    |   |
|------------|-----|-----------------------------------------------------------------------------------------------------|------------------|--------------------|---|
| 4          | 108 | histone acetylation                                                                                 |                  |                    |   |
| GO:0044419 |     | 0.000867131900157234                                                                                | 5.06713178294574 | 1.55407930247042   |   |
| 7          | 394 | interspecies interaction between organisms                                                          |                  |                    |   |
| GO:0018393 |     | 0.000920464419094877                                                                                | 10.1730153079388 | 0.433880008303924  |   |
| 4          | 110 | internal peptidyl-lysine acetylation                                                                |                  |                    |   |
| GO:0031056 |     | 0.00094253406036512                                                                                 | 17.3285024154589 | 0.193273821880839  |   |
| 3          | 49  | regulation of histone modification                                                                  |                  |                    |   |
| GO:0044257 |     | 0.000975204959013457                                                                                | 4.96167088607595 | 1.58563421216525   |   |
| 7          | 402 | cellular protein catabolic process                                                                  |                  |                    |   |
| GO:0006303 |     | 0.000983602004949684                                                                                | 52.3054545454545 | 0.0473323645422462 |   |
| 2          | 12  | double-strand break repair via nonhomologous end joining                                            |                  |                    |   |
| GO:0019321 |     | 0.000983602004949684                                                                                | 52.3054545454545 | 0.0473323645422462 |   |
| 2          | 12  | pentose metabolic process                                                                           |                  |                    |   |
| GO:0043968 |     | 0.000983602004949684                                                                                | 52.3054545454545 | 0.0473323645422462 |   |
| 2          | 12  | histone H2A acetylation                                                                             |                  |                    |   |
| GO:0018394 |     | 0.00101763507377363                                                                                 | 9.89094685823092 | 0.445713099439485  |   |
| 4          | 113 | peptidyl-lysine acetylation                                                                         |                  |                    |   |
| GO:0006006 |     | 0.00107870204397061                                                                                 | 7.07502989238741 | 0.780984014947062  |   |
| 5          | 198 | glucose metabolic process                                                                           |                  |                    |   |
| GO:0006475 |     | 0.00108629059233314                                                                                 | 9.7113717491076  | 0.453601826863193  | 4 |
| 115        |     | internal protein amino acid acetylation                                                             |                  |                    |   |
| GO:0071478 |     | 0.00153941452161595                                                                                 | 14.4838383838384 | 0.228773095287523  |   |
| 3          | 58  | cellular response to radiation                                                                      |                  |                    |   |
| GO:0000726 |     | 0.00155297347453807                                                                                 | 40.2265734265734 | 0.0591654556778078 |   |
| 2          | 15  | non-recombinational repair                                                                          |                  |                    |   |
| GO:0006473 |     | 0.00161393407662699                                                                                 | 8.68533171028606 | 0.504878555117293  |   |
| 4          | 128 | protein acetylation                                                                                 |                  |                    |   |
| GO:0022613 |     | 0.00189749896939257                                                                                 | 6.19493006993007 | 0.887481835167116  |   |
| 5          | 225 | ribonucleoprotein complex biogenesis                                                                |                  |                    |   |
| GO:0019318 |     | 0.00225138991968919                                                                                 | 5.94768223043332 | 0.922981108573801  |   |
| 5          | 234 | hexose metabolic process                                                                            |                  |                    |   |
| GO:0018205 |     | 0.00229823412393509                                                                                 | 7.85401459854015 | 0.556155283371393  |   |
| 4          | 141 | peptidyl-lysine modification                                                                        |                  |                    |   |
| GO:0071843 |     | 0.00246765333928066                                                                                 | 5.81854043392505 | 0.94270292713307   |   |
| 5          | 239 | cellular component biogenesis at cellular level                                                     |                  |                    |   |
| GO:0043543 |     | 0.00248066554433373                                                                                 | 7.68409703504043 | 0.567988374506954  |   |
| 4          | 144 | protein acylation                                                                                   |                  |                    |   |
| GO:0042254 |     | 0.00280649402421377                                                                                 | 7.41652569941444 | 0.587710193066224  |   |
| 4          | 149 | ribosome biogenesis                                                                                 |                  |                    |   |
| GO:0006260 |     | 0.0040314535482301                                                                                  | 5.16634980988593 | 1.05708947477683   |   |
| 5          | 268 | DNA replication                                                                                     |                  |                    |   |
| GO:0033044 |     | 0.00427607512846763                                                                                 | 9.94027777777778 | 0.32738218808387   |   |
| 3          | 83  | regulation of chromosome organization                                                               |                  |                    |   |
| GO:0035065 |     | 0.0043262629639112                                                                                  | 22.7209486166008 | 0.0986090927963463 |   |
| 2          | 25  | regulation of histone acetylation                                                                   |                  |                    |   |
| GO:0000291 |     | 0.00467496492120553                                                                                 | 21.7727272727273 | 0.1025534565082    | 2 |
| 26         |     | nuclear-transcribed mRNA catabolic process, exonucleolytic                                          |                  |                    |   |
| GO:0043928 |     | 0.00467496492120553                                                                                 | 21.7727272727273 | 0.1025534565082    | 2 |
| 26         |     | exonucleolytic nuclear-transcribed mRNA catabolic process involved in deadenylation-dependent decay |                  |                    |   |
| GO:0070228 |     | 0.0050362322356854                                                                                  | 20.9003636363636 | 0.106497820220054  |   |
| 2          | 27  | regulation of lymphocyte apoptotic process                                                          |                  |                    |   |
| GO:2000756 |     | 0.0050362322356854                                                                                  | 20.9003636363636 | 0.106497820220054  |   |
| 2          | 27  | regulation of peptidyl-lysine acetylation                                                           |                  |                    |   |
| GO:0009411 |     | 0.0050366602528623                                                                                  | 9.35228758169935 | 0.347104006643139  |   |
| 3          | 88  | response to UV                                                                                      |                  |                    |   |
| GO:0034660 |     | 0.00522435135594807                                                                                 | 4.84684065934066 | 1.12414365787835   |   |
| 5          | 285 | ncRNA metabolic process                                                                             |                  |                    |   |
| GO:0032508 |     | 0.00540996391986441                                                                                 | 20.0951048951049 | 0.110442183931908  |   |
| 2          | 28  | DNA duplex unwinding                                                                                |                  |                    |   |
| GO:0006261 |     | 0.00587398483150878                                                                                 | 8.82962962962963 | 0.366825825202408  |   |
| 3          | 93  | DNA-dependent DNA replication                                                                       |                  |                    |   |
| GO:0016568 |     | 0.00597030732275107                                                                                 | 3.98262355789774 | 1.65268839526676   |   |

STable4\_20PerPair

|                                                           |         |                                                           |                  |                   |         |                    |         |          |        |      |
|-----------------------------------------------------------|---------|-----------------------------------------------------------|------------------|-------------------|---------|--------------------|---------|----------|--------|------|
| 6                                                         | 419     | chromatin modification                                    |                  |                   |         |                    |         |          |        |      |
| GO:0031058                                                |         | 0.00619441932858303                                       | 18.6571428571429 |                   |         | 0.118330911355616  |         |          |        |      |
| 2                                                         | 30      | positive regulation of histone modification               |                  |                   |         |                    |         |          |        |      |
| GO:0016575                                                |         | 0.00660494395082142                                       | 18.012539184953  | 0.122275275067469 |         |                    |         | 2        |        |      |
| 31                                                        |         | histone deacetylation                                     |                  |                   |         |                    |         |          |        |      |
| GO:0006302                                                |         | 0.00758079190010149                                       | 8.02188552188552 |                   |         | 0.402325098609093  |         |          |        |      |
| 3                                                         | 102     | double-strand break repair                                |                  |                   |         |                    |         |          |        |      |
| GO:0006271                                                |         | 0.00790852280964366                                       | 16.3204545454545 |                   |         | 0.134108366203031  |         |          |        |      |
| 2                                                         | 34      | DNA strand elongation involved in DNA replication         |                  |                   |         |                    |         |          |        |      |
| GO:0034470                                                |         | 0.00793936756122365                                       | 5.46707739699653 |                   |         | 0.78887274237077   |         |          |        |      |
| 4                                                         | 200     | ncRNA processing                                          |                  |                   |         |                    |         |          |        |      |
| GO:0006364                                                |         | 0.00799575748262253                                       | 7.86193619361936 |                   |         | 0.4102138260328    |         | 3        |        |      |
| 104                                                       |         | rRNA processing                                           |                  |                   |         |                    |         |          |        |      |
| GO:0070227                                                |         | 0.00883660524121672                                       | 15.3582887700535 |                   |         | 0.141997093626739  |         |          |        |      |
| 2                                                         | 36      | lymphocyte apoptotic process                              |                  |                   |         |                    |         |          |        |      |
| GO:0022616                                                |         | 0.00931806605517473                                       | 14.9184415584416 |                   |         | 0.145941457338592  |         |          |        |      |
| 2                                                         | 37      | DNA strand elongation                                     |                  |                   |         |                    |         |          |        |      |
| GO:0016072                                                |         | 0.00932016759081294                                       | 7.41796469366563 |                   |         | 0.433880008303924  |         |          |        |      |
| 3                                                         | 110     | rRNA metabolic process                                    |                  |                   |         |                    |         |          |        |      |
| GO:2001252                                                |         | 0.00981101262259769                                       | 14.5030303030303 |                   |         | 0.149885821050446  |         |          |        |      |
| 2                                                         | 38      | positive regulation of chromosome organization            |                  |                   |         |                    |         |          |        |      |
| Tissue: Skin_Sun_Exposed_Lower_leg=>Thyroid Type: cluster |         |                                                           |                  |                   |         |                    |         |          |        |      |
| SourceGene: RP11-323D18.4(ENSG00000224625.2)              |         |                                                           |                  |                   |         |                    |         |          |        |      |
| TargetGeneSet:                                            | ZBTB48  | LZIC                                                      | RP1              | TCEB3             | EYA3    | EBNA1BP2           | DPH2    |          |        |      |
| PRKAA2                                                    | THEM4   | PYGO2                                                     | FLAD1            | HEATR1            | SLC5A6  | ASS1P2             | CCDC142 | POLR1A   | POLR1B |      |
| CNOT10                                                    | TMEM39A | TMEM41A                                                   | GFM2             | HARS              | LARS    | EEF1E1             | PAK1IP1 | RPL7L1   | POLR1C | VTA1 |
| MIOS                                                      | STOML2  | FXN                                                       | RABEPK           | ZNF79             | TBC1D13 | EXOSC2             | NGB     | ADO      | POLR3A |      |
| ENTPD7                                                    | C10orf2 | LZTS2                                                     | RP11             | PDCD11            | SPTY2D1 | TMEM216            | ZNF259  | ZNF202   | NOP2   |      |
| PA2G4                                                     | UTP20   | ATP6V0A2                                                  |                  | PUS1              | TTC5    | PRMT5              | LEO1    | C15orf26 |        |      |
| POLR3K                                                    | UBFD1   | CTD                                                       | TSR1             | TMEM199           | CTB     | PSME3              | SNX11   | METTL2A  | SIRT7  | KRI1 |
| ZNF433                                                    | NUDT19  | ZNF461                                                    | ZNF576           | OPA3              | ZNF432  | ZNF749             | NOP56   | RRP1B    | PES1   | GCAT |
| L3MBTL2                                                   | PPPDE2  | UTP14A                                                    |                  |                   |         |                    |         |          |        |      |
| GOBPID                                                    | Pvalue  | OddsRatio                                                 | ExpCount         | Count             | Size    | Term               |         |          |        |      |
| GO:0071843                                                |         | 7.77522004347637e-15                                      | 20.3221524663677 |                   |         | 1.09155075773303   |         |          |        |      |
| 16                                                        | 239     | cellular component biogenesis at cellular level           |                  |                   |         |                    |         |          |        |      |
| GO:0022613                                                |         | 6.37926985798725e-14                                      | 19.8529411764706 |                   |         | 1.02761054598298   |         |          |        |      |
| 15                                                        | 225     | ribonucleoprotein complex biogenesis                      |                  |                   |         |                    |         |          |        |      |
| GO:0042254                                                |         | 1.12063449901627e-13                                      | 25.6988068812431 |                   |         | 0.680506539339838  |         |          |        |      |
| 13                                                        | 149     | ribosome biogenesis                                       |                  |                   |         |                    |         |          |        |      |
| GO:0034660                                                |         | 2.00245516060066e-12                                      | 15.3758169934641 |                   |         | 1.30164002491177   |         |          |        |      |
| 15                                                        | 285     | ncRNA metabolic process                                   |                  |                   |         |                    |         |          |        |      |
| GO:0006364                                                |         | 3.61943461078362e-11                                      | 27.148556231003  | 0.474984430143243 |         |                    |         | 10       |        |      |
| 104                                                       |         | rRNA processing                                           |                  |                   |         |                    |         |          |        |      |
| GO:0016072                                                |         | 6.36653164247794e-11                                      | 25.5089285714286 |                   |         | 0.502387378036122  |         |          |        |      |
| 10                                                        | 110     | rRNA metabolic process                                    |                  |                   |         |                    |         |          |        |      |
| GO:0034470                                                |         | 1.49773832207879e-09                                      | 15.0222222222222 |                   |         | 0.913431596429313  |         |          |        |      |
| 11                                                        | 200     | ncRNA processing                                          |                  |                   |         |                    |         |          |        |      |
| GO:0006354                                                |         | 5.80041871081762e-07                                      | 16.7793253901661 |                   |         | 0.493253062071829  |         |          |        |      |
| 7                                                         | 108     | DNA-dependent transcription, elongation                   |                  |                   |         |                    |         |          |        |      |
| GO:0006353                                                |         | 3.33910160873591e-05                                      | 15.4324849007765 |                   |         | 0.369939796553872  |         |          |        |      |
| 5                                                         | 81      | DNA-dependent transcription, termination                  |                  |                   |         |                    |         |          |        |      |
| GO:0006385                                                |         | 7.06983285707816e-05                                      | 45.6190476190476 |                   |         | 0.0822088436786382 |         |          |        |      |
| 3                                                         | 18      | transcription elongation from RNA polymerase III promoter |                  |                   |         |                    |         |          |        |      |
| GO:0006386                                                |         | 7.06983285707816e-05                                      | 45.6190476190476 |                   |         | 0.0822088436786382 |         |          |        |      |
| 3                                                         | 18      | termination of RNA polymerase III transcription           |                  |                   |         |                    |         |          |        |      |
| GO:0006362                                                |         | 8.36803846565564e-05                                      | 42.7648809523809 |                   |         | 0.0867760016607847 |         |          |        |      |
| 3                                                         | 19      | transcription elongation from RNA polymerase I promoter   |                  |                   |         |                    |         |          |        |      |
| GO:0009303                                                |         | 8.36803846565564e-05                                      | 42.7648809523809 |                   |         | 0.0867760016607847 |         |          |        |      |
| 3                                                         | 19      | rRNA transcription                                        |                  |                   |         |                    |         |          |        |      |
| GO:0006363                                                |         | 0.000114107463271234                                      | 38.0079365079365 |                   |         | 0.0959103176250778 |         |          |        |      |
| 3                                                         | 21      | termination of RNA polymerase I transcription             |                  |                   |         |                    |         |          |        |      |
| GO:0006361                                                |         | 0.000171956454651492                                      | 32.5714285714286 |                   |         | 0.109611791571518  |         |          |        |      |
| 3                                                         | 24      | transcription initiation from RNA polymerase I promoter   |                  |                   |         |                    |         |          |        |      |

Stable4\_20PerPair

|                                             |                                                                                           |                                                |                      |                  |          |                   |                                                                     |           |          |      |
|---------------------------------------------|-------------------------------------------------------------------------------------------|------------------------------------------------|----------------------|------------------|----------|-------------------|---------------------------------------------------------------------|-----------|----------|------|
| GO:0007000                                  | 0.000203629069863812                                                                      | 149.8125                                       | 0.0228357899107328   | 2                |          |                   |                                                                     |           |          |      |
| 5                                           | nucleolus organization                                                                    |                                                |                      |                  |          |                   |                                                                     |           |          |      |
| GO:0000466                                  | 0.000304542518136291                                                                      | 112.3515625                                    | 0.0274029478928794   | 2                |          |                   |                                                                     |           |          |      |
| 6                                           | maturation of 5.8S rRNA from tricistronic rRNA transcript (SSU-rRNA, 5.8S rRNA, LSU-rRNA) |                                                |                      |                  |          |                   |                                                                     |           |          |      |
| GO:0006360                                  | 0.000410539573718707                                                                      | 23.5730706075534                               | 0.14614905542869     |                  |          |                   |                                                                     |           |          |      |
| 3                                           | 32                                                                                        | transcription from RNA polymerase I promoter   |                      |                  |          |                   |                                                                     |           |          |      |
| GO:0071826                                  | 0.00112000369305845                                                                       | 9.60282258064516                               | 0.456715798214656    |                  |          |                   |                                                                     |           |          |      |
| 4                                           | 100                                                                                       | ribonucleoprotein complex subunit organization |                      |                  |          |                   |                                                                     |           |          |      |
| GO:0000460                                  | 0.00131646899746473                                                                       | 44.921875                                      | 0.0548058957857588   | 2                |          |                   |                                                                     |           |          |      |
| 12                                          | maturation of 5.8S rRNA                                                                   |                                                |                      |                  |          |                   |                                                                     |           |          |      |
| GO:0006418                                  | 0.00135892751961416                                                                       | 15.1746031746032                               | 0.219223583143035    |                  |          |                   |                                                                     |           |          |      |
| 3                                           | 48                                                                                        | tRNA aminoacylation for protein translation    |                      |                  |          |                   |                                                                     |           |          |      |
| GO:0043038                                  | 0.00162032020688437                                                                       | 14.2232142857143                               | 0.232925057089475    |                  |          |                   |                                                                     |           |          |      |
| 3                                           | 51                                                                                        | amino acid activation                          |                      |                  |          |                   |                                                                     |           |          |      |
| GO:0043039                                  | 0.00162032020688437                                                                       | 14.2232142857143                               | 0.232925057089475    |                  |          |                   |                                                                     |           |          |      |
| 3                                           | 51                                                                                        | tRNA aminoacylation                            |                      |                  |          |                   |                                                                     |           |          |      |
| GO:0006383                                  | 0.0017139455188221                                                                        | 13.9319727891156                               | 0.237492215071621    |                  |          |                   |                                                                     |           |          |      |
| 3                                           | 52                                                                                        | transcription from RNA polymerase III promoter |                      |                  |          |                   |                                                                     |           |          |      |
| GO:0006399                                  | 0.00254227009695544                                                                       | 7.60543854972007                               | 0.57089474776832     |                  |          |                   |                                                                     |           |          |      |
| 4                                           | 125                                                                                       | tRNA metabolic process                         |                      |                  |          |                   |                                                                     |           |          |      |
| GO:0016570                                  | 0.00674626543153756                                                                       | 4.52388575819672                               | 1.19202823334025     |                  |          |                   |                                                                     |           |          |      |
| 5                                           | 261                                                                                       | histone modification                           |                      |                  |          |                   |                                                                     |           |          |      |
| GO:0016569                                  | 0.00740867475787636                                                                       | 4.41840820923539                               | 1.21943118123313     |                  |          |                   |                                                                     |           |          |      |
| 5                                           | 267                                                                                       | covalent chromatin modification                |                      |                  |          |                   |                                                                     |           |          |      |
| GO:0000387                                  | 0.00877135240453798                                                                       | 15.4698275862069                               | 0.141581897446543    |                  |          |                   |                                                                     |           |          |      |
| 2                                           | 31                                                                                        | spliceosomal snRNP assembly                    |                      |                  |          |                   |                                                                     |           |          |      |
| GO:0022618                                  | 0.00934004599905399                                                                       | 7.398033126294                                 | 0.433880008303924    | 3                |          |                   |                                                                     |           |          |      |
| 95                                          | ribonucleoprotein complex assembly                                                        |                                                |                      |                  |          |                   |                                                                     |           |          |      |
| Tissue: Thyroid=>Skin_Sun_Exposed_Lower_leg |                                                                                           | Type:                                          | asymmetric           |                  |          |                   |                                                                     |           |          |      |
| SourceGene: RP11-47304.3(ENSG00000253720.1) |                                                                                           |                                                |                      |                  |          |                   |                                                                     |           |          |      |
| TargetGeneSet:                              | TRIT1                                                                                     | RPS8                                           | PRPF38A              | NEDD4            | RPL5     | BOLA1             | DCST2                                                               | PAQR6     | COPA     |      |
| LYPLAL1                                     | SRP9                                                                                      | C1orf35                                        | RPS7                 | RP11             | TMEM214  | DDIT3             | UBC                                                                 | FIGLA     | TPRKB    | COA5 |
| ARL6IP6                                     | ASNSD1                                                                                    | SEN2                                           | NOP58                | EEF1B2           | USP40    | CRBN              | GRM2                                                                | THOC7     | RPL24    | RYK  |
| SNORA63                                     | MRFAP1L1                                                                                  |                                                | COMMD8               | EXOC7            | RPL34    | CDKN2AIP          |                                                                     | PPWD1     | TAF9     | CTD  |
| MAN2A1                                      | NPM1                                                                                      | BOD1                                           | TMEM14B              | TDP2             | HIST1H1B |                   | PRRT1                                                               | AGER      | MAD2L1BP |      |
| COQ3                                        | RP3                                                                                       | AIM1                                           | ASF1A                | GTF2H5           | C6orf70  | KLHL7             | TAX1BP1                                                             | SBDS      | C8orf40  | FNTA |
| SGK3                                        | PAF1                                                                                      | KKS1BP7                                        | CA3                  | TTC35            | C8orf76  | C9orf123          |                                                                     | RPS6      | NDUFB6   |      |
| CHMP5                                       | C10orf31                                                                                  |                                                | COMMD3               | CUL2             | CHCHD1   | RPS24             | C10orf32                                                            |           | HRAS     |      |
| C11orf58                                    |                                                                                           | C11orf46                                       |                      | IMMP1L           | CCDC90B  | ZCRB1             | NACA                                                                | C12orf47  |          |      |
| MRP63                                       | EFHA1                                                                                     | HMGB1                                          | FRY-AS1              | UFM1             | WBP4     | UPF3A             | METTTL17                                                            | EAPP      | SNX6     |      |
| SRSF5                                       | RSL24D1                                                                                   | UBAP1L                                         | MTHFS                | WFIKKN1          | RHBDL1   | NUDT21            | EDC4                                                                | FTLP14    | PSMD7    |      |
| MED11                                       | RPL26                                                                                     | RPS7P1                                         | C17orf75             |                  | ARHGAP27 |                   | CEP95                                                               | NOL11     | RPL17    |      |
| CIRBP                                       | XAB2                                                                                      | CCDC130                                        | SLC25A42             |                  | SUGP1    | FAM98C            | ZNF773                                                              | C21orf119 |          |      |
| SPATA20P1                                   |                                                                                           | CTA                                            | TBC1D8B              | VBP1             |          |                   |                                                                     |           |          |      |
| GOBPID                                      | Pvalue                                                                                    | OddsRatio                                      | ExpCount             | Count            | Size     | Term              |                                                                     |           |          |      |
| GO:0006414                                  | 12                                                                                        | 105                                            | 9.63494194805802e-13 | 25.2284577993814 |          | 0.617604318040274 | translational elongation                                            |           |          |      |
| GO:0006614                                  | 11                                                                                        | 105                                            | 2.38224892509629e-11 | 22.5692926969523 |          | 0.617604318040274 | SRP-dependent cotranslational protein targeting to membrane         |           |          |      |
| GO:0006613                                  | 11                                                                                        | 106                                            | 2.64556672883813e-11 | 22.3301564722617 |          | 0.623486263926372 | cotranslational protein targeting to membrane                       |           |          |      |
| GO:0045047                                  | 11                                                                                        | 106                                            | 2.64556672883813e-11 | 22.3301564722617 |          | 0.623486263926372 | protein targeting to ER                                             |           |          |      |
| GO:0072599                                  | 11                                                                                        | 106                                            | 2.64556672883813e-11 | 22.3301564722617 |          | 0.623486263926372 | establishment of protein localization to endoplasmic reticulum      |           |          |      |
| GO:0070972                                  | 11                                                                                        | 118                                            | 8.604099912405e-11   | 19.8091689820662 |          | 0.694069614559546 | protein localization to endoplasmic reticulum                       |           |          |      |
| GO:0000184                                  | 11                                                                                        | 119                                            | 9.43576716288022e-11 | 19.6243743743744 |          | 0.699951560445644 | nuclear-transcribed mRNA catabolic process, nonsense-mediated decay |           |          |      |
| GO:0006415                                  | 10                                                                                        | 91                                             | 1.2558277564126e-10  | 23.5144032921811 |          | 0.535257075634904 | translational termination                                           |           |          |      |
| GO:0072594                                  |                                                                                           |                                                | 1.82545487122759e-10 | 13.3998691099476 |          | 1.19991696076396  |                                                                     |           |          |      |

Stable4\_20PerPair

|              |       |                                                    |                  |                    |    |     |
|--------------|-------|----------------------------------------------------|------------------|--------------------|----|-----|
| 13           | 204   | establishment of protein localization to organelle |                  |                    |    |     |
| GO:0000956   |       | 2.77698857692242e-10                               | 14.8772358432947 | 0.994048854750536  |    |     |
| 12           | 169   | nuclear-transcribed mRNA catabolic process         |                  |                    |    |     |
| GO:0006402   |       | 5.06479339728e-10                                  | 14.0617263574847 | 1.04698636772542   |    |     |
| 12           | 178   | mRNA catabolic process                             |                  |                    |    |     |
| GO:0022613   |       | 6.13784041834554e-10                               | 12.0546383647799 | 1.32343782437202   |    |     |
| 13           | 225   | ribonucleoprotein complex biogenesis               |                  |                    |    |     |
| GO:0071843   |       | 1.28677545195209e-09                               | 11.2967059980334 | 1.40578506677739   |    |     |
| 13           | 239   | cellular component biogenesis at cellular level    |                  |                    |    |     |
| GO:0006612   |       | 1.42124265995181e-09                               | 14.8899885801294 | 0.899937720572971  |    |     |
| 11           | 153   | protein targeting to membrane                      |                  |                    |    |     |
| GO:0043624   |       | 1.42124265995181e-09                               | 14.8899885801294 | 0.899937720572971  |    |     |
| 11           | 153   | cellular protein complex disassembly               |                  |                    |    |     |
| GO:0043241   |       | 2.00077200951795e-09                               | 14.3784703070417 | 0.92934745000346   |    |     |
| 11           | 158   | protein complex disassembly                        |                  |                    |    |     |
| GO:0006401   |       | 2.55551489636779e-09                               | 12.0715451770885 | 1.20579890665006   |    |     |
| 12           | 205   | RNA catabolic process                              |                  |                    |    |     |
| GO:0034623   |       | 5.5419676658147e-09                                | 12.9524954402255 | 1.02345858418103   |    |     |
| 11           | 174   | cellular macromolecular complex disassembly        |                  |                    |    |     |
| GO:0032984   |       | 7.45977842054639e-09                               | 12.5625804375804 | 1.05286831361151   |    |     |
| 11           | 179   | macromolecular complex disassembly                 |                  |                    |    |     |
| GO:0071845   |       | 1.03535434187357e-08                               | 9.39088765887659 | 1.67047263165179   |    |     |
| 13           | 284   | cellular component disassembly at cellular level   |                  |                    |    |     |
| GO:0022411   |       | 1.22352049119903e-08                               | 9.25166666666667 | 1.69400041519618   |    |     |
| 13           | 288   | cellular component disassembly                     |                  |                    |    |     |
| GO:0042254   |       | 1.61989775956199e-08                               | 13.6470023980815 | 0.876409937028579  |    |     |
| 10           | 149   | ribosome biogenesis                                |                  |                    |    |     |
| GO:0019080   |       | 1.84113478799433e-08                               | 13.451536643026  | 0.888173828800775  | 10 |     |
| 151          | viral | genome expression                                  |                  |                    |    |     |
| GO:0019083   |       | 1.84113478799433e-08                               | 13.451536643026  | 0.888173828800775  | 10 |     |
| 151          | viral | transcription                                      |                  |                    |    |     |
| GO:0006413   |       | 1.96145897607643e-08                               | 13.3558685446009 | 0.894055774686873  |    |     |
| 10           | 152   | translational initiation                           |                  |                    |    |     |
| GO:0022415   |       | 3.66556342556424e-08                               | 9.35793194874061 | 1.52930593038544   |    |     |
| 12           | 260   | viral reproductive process                         |                  |                    |    |     |
| GO:0006364   |       | 1.66876313981007e-07                               | 15.4437229437229 | 0.611722372154176  |    |     |
| 8            | 104   | rRNA processing                                    |                  |                    |    |     |
| GO:0016072   |       | 2.57978972112315e-07                               | 14.5291571173924 | 0.647014047470763  |    |     |
| 8            | 110   | rRNA metabolic process                             |                  |                    |    |     |
| GO:0016032   |       | 3.40853072402775e-07                               | 6.28504206014117 | 2.65275759463013   |    |     |
| 14           | 451   | viral reproduction                                 |                  |                    |    |     |
| GO:0033365   |       | 6.04687279925659e-07                               | 5.97434717235877 | 2.78216040412428   |    |     |
| 14           | 473   | protein localization to organelle                  |                  |                    |    |     |
| GO:0006605   |       | 6.20176219177771e-07                               | 5.96093080220453 | 2.78804235001038   |    |     |
| 14           | 474   | protein targeting                                  |                  |                    |    |     |
| GO:0019058   |       | 9.8363073351747e-07                                | 8.53393665158371 | 1.3587294996886    | 10 |     |
| 231          | viral | infectious cycle                                   |                  |                    |    |     |
| GO:0034470   |       | 2.58422186747729e-06                               | 8.78857812069441 | 1.17638917721957   |    |     |
| 9            | 200   | ncRNA processing                                   |                  |                    |    |     |
| GO:0042274   |       | 3.20324942668156e-06                               | 50.6243386243386 | 0.105875025949761  |    |     |
| 4            | 18    | ribosomal small subunit biogenesis                 |                  |                    |    |     |
| GO:0008380   |       | 1.92025972464917e-05                               | 5.9863684771033  | 1.8998685212096    | 10 | 323 |
| RNA splicing |       |                                                    |                  |                    |    |     |
| GO:0022618   |       | 1.98158317671353e-05                               | 12.1834731901579 | 0.558784859179296  |    |     |
| 6            | 95    | ribonucleoprotein complex assembly                 |                  |                    |    |     |
| GO:0071826   |       | 2.65503682587538e-05                               | 11.5313762456235 | 0.588194588609785  |    |     |
| 6            | 100   | ribonucleoprotein complex subunit organization     |                  |                    |    |     |
| GO:0042273   |       | 4.15850860595777e-05                               | 58.3617886178862 | 0.0705833506331742 |    |     |
| 3            | 12    | ribosomal large subunit biogenesis                 |                  |                    |    |     |
| GO:0034660   |       | 4.41491830450558e-05                               | 6.04548054919908 | 1.67635457753789   |    |     |
| 9            | 285   | ncRNA metabolic process                            |                  |                    |    |     |
| GO:0042255   |       | 0.000104066430391483                               | 40.3930581613508 | 0.0941111341775656 |    |     |
| 3            | 16    | ribosome assembly                                  |                  |                    |    |     |

Stable4\_20PerPair

|            |                                                                                          |                  |                    |
|------------|------------------------------------------------------------------------------------------|------------------|--------------------|
| GO:0006397 | 0.000113667369892079                                                                     | 4.79074550128535 | 2.34689640855304   |
| 10 399     | mRNA processing                                                                          |                  |                    |
| GO:0000377 | 0.000196098658897105                                                                     | 6.45470519328387 | 1.19991696076396   |
| 7 204      | RNA splicing, via transesterification reactions with bulged adenosine as nucleophile     |                  |                    |
| GO:0000398 | 0.000196098658897105                                                                     | 6.45470519328387 | 1.19991696076396   |
| 7 204      | nuclear mRNA splicing, via spliceosome                                                   |                  |                    |
| GO:0000375 | 0.000227478789806445                                                                     | 6.29271388677329 | 1.22932669019445   |
| 7 209      | RNA splicing, via transesterification reactions                                          |                  |                    |
| GO:0000462 | 0.000505082847272706                                                                     | 86.5180722891566 | 0.0352916753165871 |
| 2 6        | maturation of SSU-rRNA from tricistronic rRNA transcript (SSU-rRNA, 5.8S rRNA, LSU-rRNA) |                  |                    |
| GO:0030490 | 0.000704412693740366                                                                     | 69.2096385542169 | 0.0411736212026849 |
| 2 7        | maturation of SSU-rRNA                                                                   |                  |                    |
| GO:0006511 | 0.00133476465735811                                                                      | 4.08872026849555 | 2.14102830253962   |
| 8 364      | ubiquitin-dependent protein catabolic process                                            |                  |                    |
| GO:0019941 | 0.00150602053313423                                                                      | 4.00787091696183 | 2.1822019237423 8  |
| 371        | modification-dependent protein catabolic process                                         |                  |                    |
| GO:0043632 | 0.00158456918102932                                                                      | 3.97416790859414 | 2.1998477614006 8  |
| 374        | modification-dependent macromolecule catabolic process                                   |                  |                    |
| GO:0006281 | 0.00183993437902993                                                                      | 3.87629437229437 | 2.25278527437548   |
| 8 383      | DNA repair                                                                               |                  |                    |
| GO:0051603 | 0.00202755986881313                                                                      | 3.81361420731499 | 2.28807694969206   |
| 8 389      | proteolysis involved in cellular protein catabolic process                               |                  |                    |
| GO:0050930 | 0.00217192689908843                                                                      | 34.5927710843374 | 0.0705833506331742 |
| 2 12       | induction of positive chemotaxis                                                         |                  |                    |
| GO:0030163 | 0.0024694876358983                                                                       | 3.38206627680312 | 2.91156321361843   |
| 9 495      | protein catabolic process                                                                |                  |                    |
| GO:0044257 | 0.00248597939151822                                                                      | 3.68435625288417 | 2.36454224621134   |
| 8 402      | cellular protein catabolic process                                                       |                  |                    |
| GO:0043620 | 0.00492094639463268                                                                      | 21.6114457831325 | 0.105875025949761  |
| 2 18       | regulation of DNA-dependent transcription in response to stress                          |                  |                    |
| GO:0050927 | 0.00606459675869567                                                                      | 19.2074966532798 | 0.117638917721957  |
| 2 20       | positive regulation of positive chemotaxis                                               |                  |                    |
| GO:0050926 | 0.0066775058852177                                                                       | 18.1953075459734 | 0.123520863608055  |
| 2 21       | regulation of positive chemotaxis                                                        |                  |                    |
| GO:0043161 | 0.00776631411310921                                                                      | 4.33884803921569 | 1.22932669019445   |
| 5 209      | proteasomal ubiquitin-dependent protein catabolic process                                |                  |                    |
| GO:0065004 | 0.00823021901095836                                                                      | 5.36612948826689 | 0.794062694623209  |
| 4 135      | protein-DNA complex assembly                                                             |                  |                    |
| GO:0007346 | 0.00885705081886503                                                                      | 3.59774964838256 | 1.78222960348765   |
| 6 303      | regulation of mitotic cell cycle                                                         |                  |                    |
| GO:0010498 | 0.00888459433957299                                                                      | 4.1928317535545  | 1.27050031139714 5 |
| 216        | proteasomal protein catabolic process                                                    |                  |                    |
| GO:0007093 | 0.00910002199762345                                                                      | 5.20566986739826 | 0.817590478167601  |
| 4 139      | mitotic cell cycle checkpoint                                                            |                  |                    |

Tissue: Thyroid=>Skin\_Sun\_Exposed\_Lower\_leg Type: cluster

SourceGene: RP11-47304.3(ENSG00000253720.1)

|                |          |           |          |          |          |          |          |           |          |      |
|----------------|----------|-----------|----------|----------|----------|----------|----------|-----------|----------|------|
| TargetGeneSet: | TRIT1    | RPS8      | PRPF38A  | NEDD4    | RPL5     | BOLA1    | DCST2    | PAQR6     | COPA     |      |
| LYPLAL1        | SRP9     | C1orf35   | RPS7     | RP11     | TMEM214  | DDIT3    | UBC      | FIGLA     | TPRKB    | COA5 |
| ARL6IP6        | ASNSD1   | SENP2     | NOP58    | EEF1B2   | USP40    | CRBN     | GRM2     | THOC7     | RPL24    | RYK  |
| SNORA63        | MRFAP1L1 |           | COMMD8   | EXOC7    | RPL34    | CDKN2AIP |          | PPWD1     | TAF9     | CTD  |
| MAN2A1         | NPM1     | BOD1      | TMEM14B  | TDP2     | HIST1H1B |          | PRRT1    | AGER      | MAD2L1BP |      |
| COQ3           | RP3      | AIM1      | ASF1A    | GTF2H5   | C6orf70  | KLHL7    | TAX1BP1  | SBDS      | C8orf40  | FNTA |
| SGK3           | PAF1     | CKS1BP7   | CA3      | TTC35    | C8orf76  | C9orf123 |          | RPS6      | NDUFB6   |      |
| CHMP5          | C10orf31 |           | COMMD3   | CUL2     | CHCHD1   | RPS24    | C10orf32 |           | HRAS     |      |
| C11orf58       |          | C11orf46  |          | IMMP1L   | CCDC90B  | ZCRB1    | NACA     | C12orf47  |          |      |
| MRP63          | EFHA1    | HMGB1     | FRY-AS1  | UFM1     | WBP4     | UPF3A    | METTTL17 | EAPP      | SNX6     |      |
| SRSF5          | RSL24D1  | UBAP1L    | MTHFS    | WFIKK1   | RHBDL1   | NUDT21   | EDC4     | FTLP14    | PSMD7    |      |
| MED11          | RPL26    | RPS7P1    | C17orf75 |          | ARHGAP27 |          | CEP95    | NOL11     | RPL17    |      |
| CIRBP          | XAB2     | CCDC130   | SLC25A42 |          | SUGP1    | FAM98C   | ZNF773   | C21orf119 |          |      |
| SPATA20P1      |          | CTA       | TBC1D8B  | VBP1     |          |          |          |           |          |      |
| GOBPID         | Pvalue   | OddsRatio |          | ExpCount |          | Count    | Size     | Term      |          |      |

Stable4\_20PerPair

|            |                      |                                                                     |                   |
|------------|----------------------|---------------------------------------------------------------------|-------------------|
| GO:0006414 | 9.63494194805802e-13 | 25.2284577993814                                                    | 0.617604318040274 |
| 12         | 105                  | translational elongation                                            |                   |
| GO:0006614 | 2.38224892509629e-11 | 22.5692926969523                                                    | 0.617604318040274 |
| 11         | 105                  | SRP-dependent cotranslational protein targeting to membrane         |                   |
| GO:0006613 | 2.64556672883813e-11 | 22.3301564722617                                                    | 0.623486263926372 |
| 11         | 106                  | cotranslational protein targeting to membrane                       |                   |
| GO:0045047 | 2.64556672883813e-11 | 22.3301564722617                                                    | 0.623486263926372 |
| 11         | 106                  | protein targeting to ER                                             |                   |
| GO:0072599 | 2.64556672883813e-11 | 22.3301564722617                                                    | 0.623486263926372 |
| 11         | 106                  | establishment of protein localization to endoplasmic reticulum      |                   |
| GO:0070972 | 8.604099912405e-11   | 19.8091689820662                                                    | 0.694069614559546 |
| 11         | 118                  | protein localization to endoplasmic reticulum                       |                   |
| GO:0000184 | 9.43576716288022e-11 | 19.6243743743744                                                    | 0.699951560445644 |
| 11         | 119                  | nuclear-transcribed mRNA catabolic process, nonsense-mediated decay |                   |
| GO:0006415 | 1.2558277564126e-10  | 23.5144032921811                                                    | 0.535257075634904 |
| 10         | 91                   | translational termination                                           |                   |
| GO:0072594 | 1.82545487122759e-10 | 13.3998691099476                                                    | 1.19991696076396  |
| 13         | 204                  | establishment of protein localization to organelle                  |                   |
| GO:0000956 | 2.77698857692242e-10 | 14.8772358432947                                                    | 0.994048854750536 |
| 12         | 169                  | nuclear-transcribed mRNA catabolic process                          |                   |
| GO:0006402 | 5.06479339728e-10    | 14.0617263574847                                                    | 1.04698636772542  |
| 12         | 178                  | mRNA catabolic process                                              |                   |
| GO:0022613 | 6.13784041834554e-10 | 12.0546383647799                                                    | 1.32343782437202  |
| 13         | 225                  | ribonucleoprotein complex biogenesis                                |                   |
| GO:0071843 | 1.28677545195209e-09 | 11.2967059980334                                                    | 1.40578506677739  |
| 13         | 239                  | cellular component biogenesis at cellular level                     |                   |
| GO:0006612 | 1.42124265995181e-09 | 14.8899885801294                                                    | 0.899937720572971 |
| 11         | 153                  | protein targeting to membrane                                       |                   |
| GO:0043624 | 1.42124265995181e-09 | 14.8899885801294                                                    | 0.899937720572971 |
| 11         | 153                  | cellular protein complex disassembly                                |                   |
| GO:0043241 | 2.00077200951795e-09 | 14.3784703070417                                                    | 0.92934745000346  |
| 11         | 158                  | protein complex disassembly                                         |                   |
| GO:0006401 | 2.55551489636779e-09 | 12.0715451770885                                                    | 1.20579890665006  |
| 12         | 205                  | RNA catabolic process                                               |                   |
| GO:0034623 | 5.5419676658147e-09  | 12.9524954402255                                                    | 1.02345858418103  |
| 11         | 174                  | cellular macromolecular complex disassembly                         |                   |
| GO:0032984 | 7.45977842054639e-09 | 12.5625804375804                                                    | 1.05286831361151  |
| 11         | 179                  | macromolecular complex disassembly                                  |                   |
| GO:0071845 | 1.03535434187357e-08 | 9.39088765887659                                                    | 1.67047263165179  |
| 13         | 284                  | cellular component disassembly at cellular level                    |                   |
| GO:0022411 | 1.22352049119903e-08 | 9.25166666666667                                                    | 1.69400041519618  |
| 13         | 288                  | cellular component disassembly                                      |                   |
| GO:0042254 | 1.61989775956199e-08 | 13.6470023980815                                                    | 0.876409937028579 |
| 10         | 149                  | ribosome biogenesis                                                 |                   |
| GO:0019080 | 1.84113478799433e-08 | 13.451536643026                                                     | 0.888173828800775 |
| 151        |                      | viral genome expression                                             | 10                |
| GO:0019083 | 1.84113478799433e-08 | 13.451536643026                                                     | 0.888173828800775 |
| 151        |                      | viral transcription                                                 | 10                |
| GO:0006413 | 1.96145897607643e-08 | 13.3558685446009                                                    | 0.894055774686873 |
| 10         | 152                  | translational initiation                                            |                   |
| GO:0022415 | 3.66556342556424e-08 | 9.35793194874061                                                    | 1.52930593038544  |
| 12         | 260                  | viral reproductive process                                          |                   |
| GO:0006364 | 1.66876313981007e-07 | 15.4437229437229                                                    | 0.611722372154176 |
| 8          | 104                  | rRNA processing                                                     |                   |
| GO:0016072 | 2.57978972112315e-07 | 14.5291571173924                                                    | 0.647014047470763 |
| 8          | 110                  | rRNA metabolic process                                              |                   |
| GO:0016032 | 3.40853072402775e-07 | 6.28504206014117                                                    | 2.65275759463013  |
| 14         | 451                  | viral reproduction                                                  |                   |
| GO:0033365 | 6.04687279925659e-07 | 5.97434717235877                                                    | 2.78216040412428  |
| 14         | 473                  | protein localization to organelle                                   |                   |
| GO:0006605 | 6.20176219177771e-07 | 5.96093080220453                                                    | 2.78804235001038  |
| 14         | 474                  | protein targeting                                                   |                   |
| GO:0019058 | 9.8363073351747e-07  | 8.53393665158371                                                    | 1.3587294996886   |

STable4\_20PerPair

|              |                        |                                                                                          |                  |                    |     |
|--------------|------------------------|------------------------------------------------------------------------------------------|------------------|--------------------|-----|
| 231          | viral infectious cycle |                                                                                          |                  |                    |     |
| GO:0034470   | 2.58422186747729e-06   | 8.78857812069441                                                                         |                  | 1.17638917721957   |     |
| 9            | 200                    | ncRNA processing                                                                         |                  |                    |     |
| GO:0042274   | 3.20324942668156e-06   | 50.6243386243386                                                                         |                  | 0.105875025949761  |     |
| 4            | 18                     | ribosomal small subunit biogenesis                                                       |                  |                    |     |
| GO:0008380   | 1.92025972464917e-05   | 5.9863684771033                                                                          | 1.8998685212096  | 10                 | 323 |
| RNA splicing |                        |                                                                                          |                  |                    |     |
| GO:0022618   | 1.98158317671353e-05   | 12.1834731901579                                                                         |                  | 0.558784859179296  |     |
| 6            | 95                     | ribonucleoprotein complex assembly                                                       |                  |                    |     |
| GO:0071826   | 2.65503682587538e-05   | 11.5313762456235                                                                         |                  | 0.588194588609785  |     |
| 6            | 100                    | ribonucleoprotein complex subunit organization                                           |                  |                    |     |
| GO:0042273   | 4.15850860595777e-05   | 58.3617886178862                                                                         |                  | 0.0705833506331742 |     |
| 3            | 12                     | ribosomal large subunit biogenesis                                                       |                  |                    |     |
| GO:0034660   | 4.41491830450558e-05   | 6.04548054919908                                                                         |                  | 1.67635457753789   |     |
| 9            | 285                    | ncRNA metabolic process                                                                  |                  |                    |     |
| GO:0042255   | 0.000104066430391483   | 40.3930581613508                                                                         |                  | 0.0941111341775656 |     |
| 3            | 16                     | ribosome assembly                                                                        |                  |                    |     |
| GO:0006397   | 0.000113667369892079   | 4.79074550128535                                                                         |                  | 2.34689640855304   |     |
| 10           | 399                    | mRNA processing                                                                          |                  |                    |     |
| GO:0000377   | 0.000196098658897105   | 6.45470519328387                                                                         |                  | 1.19991696076396   |     |
| 7            | 204                    | RNA splicing, via transesterification reactions with bulged adenosine as nucleophile     |                  |                    |     |
| GO:0000398   | 0.000196098658897105   | 6.45470519328387                                                                         |                  | 1.19991696076396   |     |
| 7            | 204                    | nuclear mRNA splicing, via spliceosome                                                   |                  |                    |     |
| GO:0000375   | 0.000227478789806445   | 6.29271388677329                                                                         |                  | 1.22932669019445   |     |
| 7            | 209                    | RNA splicing, via transesterification reactions                                          |                  |                    |     |
| GO:0000462   | 0.000505082847272706   | 86.5180722891566                                                                         |                  | 0.0352916753165871 |     |
| 2            | 6                      | maturation of SSU-rRNA from tricistronic rRNA transcript (SSU-rRNA, 5.8S rRNA, LSU-rRNA) |                  |                    |     |
| GO:0030490   | 0.000704412693740366   | 69.2096385542169                                                                         |                  | 0.0411736212026849 |     |
| 2            | 7                      | maturation of SSU-rRNA                                                                   |                  |                    |     |
| GO:0006511   | 0.00133476465735811    | 4.08872026849555                                                                         |                  | 2.14102830253962   |     |
| 8            | 364                    | ubiquitin-dependent protein catabolic process                                            |                  |                    |     |
| GO:0019941   | 0.00150602053313423    | 4.00787091696183                                                                         |                  | 2.1822019237423    | 8   |
| 371          |                        | modification-dependent protein catabolic process                                         |                  |                    |     |
| GO:0043632   | 0.00158456918102932    | 3.97416790859414                                                                         |                  | 2.1998477614006    | 8   |
| 374          |                        | modification-dependent macromolecule catabolic process                                   |                  |                    |     |
| GO:0006281   | 0.00183993437902993    | 3.87629437229437                                                                         |                  | 2.25278527437548   |     |
| 8            | 383                    | DNA repair                                                                               |                  |                    |     |
| GO:0051603   | 0.00202755986881313    | 3.81361420731499                                                                         |                  | 2.28807694969206   |     |
| 8            | 389                    | proteolysis involved in cellular protein catabolic process                               |                  |                    |     |
| GO:0050930   | 0.00217192689908843    | 34.5927710843374                                                                         |                  | 0.0705833506331742 |     |
| 2            | 12                     | induction of positive chemotaxis                                                         |                  |                    |     |
| GO:0030163   | 0.0024694876358983     | 3.38206627680312                                                                         |                  | 2.91156321361843   |     |
| 9            | 495                    | protein catabolic process                                                                |                  |                    |     |
| GO:0044257   | 0.00248597939151822    | 3.68435625288417                                                                         |                  | 2.36454224621134   |     |
| 8            | 402                    | cellular protein catabolic process                                                       |                  |                    |     |
| GO:0043620   | 0.00492094639463268    | 21.6114457831325                                                                         |                  | 0.105875025949761  |     |
| 2            | 18                     | regulation of DNA-dependent transcription in response to stress                          |                  |                    |     |
| GO:0050927   | 0.00606459675869567    | 19.2074966532798                                                                         |                  | 0.117638917721957  |     |
| 2            | 20                     | positive regulation of positive chemotaxis                                               |                  |                    |     |
| GO:0050926   | 0.0066775058852177     | 18.1953075459734                                                                         |                  | 0.123520863608055  |     |
| 2            | 21                     | regulation of positive chemotaxis                                                        |                  |                    |     |
| GO:0043161   | 0.00776631411310921    | 4.33884803921569                                                                         |                  | 1.22932669019445   |     |
| 5            | 209                    | proteasomal ubiquitin-dependent protein catabolic process                                |                  |                    |     |
| GO:0065004   | 0.00823021901095836    | 5.36612948826689                                                                         |                  | 0.794062694623209  |     |
| 4            | 135                    | protein-DNA complex assembly                                                             |                  |                    |     |
| GO:0007346   | 0.00885705081886503    | 3.59774964838256                                                                         |                  | 1.78222960348765   |     |
| 6            | 303                    | regulation of mitotic cell cycle                                                         |                  |                    |     |
| GO:0010498   | 0.00888459433957299    | 4.1928317535545                                                                          | 1.27050031139714 |                    | 5   |
| 216          |                        | proteasomal protein catabolic process                                                    |                  |                    |     |
| GO:0007093   | 0.00910002199762345    | 5.20566986739826                                                                         |                  | 0.817590478167601  |     |
| 4            | 139                    | mitotic cell cycle checkpoint                                                            |                  |                    |     |

Stable4\_20PerPair

| Tissue:                             | SourceGene:                  | TargetGeneSet:                                               | VPID                 | TRDN             | CATSPERB                                              | GOBPID | Pvalue | OddsRatio | ExpCount | Count | Size | Term                |
|-------------------------------------|------------------------------|--------------------------------------------------------------|----------------------|------------------|-------------------------------------------------------|--------|--------|-----------|----------|-------|------|---------------------|
| Skin_Sun_Exposed_Lower_leg=>Thyroid | SLC26A10(ENSG00000135502.12) | RP11 CACNA1S Clorf147                                        |                      |                  |                                                       |        |        |           |          |       |      | asymmetric          |
|                                     |                              | ACTA1 ACTN2 XIRP2 MYL1                                       |                      |                  |                                                       |        |        |           |          |       |      |                     |
|                                     |                              | VGLL2 TRDN BPGM MYPN TNNI2 OR7E13P TBRG1 RP3 MYBPC1 C12orf73 |                      |                  |                                                       |        |        |           |          |       |      |                     |
|                                     |                              | TCHP CATSPERB MYH2 CKM TNNT1 PCNT MYO18B                     |                      |                  |                                                       |        |        |           |          |       |      |                     |
| GO:0030049                          | 7                            | 39                                                           | 4.45877744890921e-14 | 242.290865384615 | muscle filament sliding                               |        |        |           |          |       |      | 0.0539755034253685  |
| GO:0033275                          | 7                            | 39                                                           | 4.45877744890921e-14 | 242.290865384615 | actin-myosin filament sliding                         |        |        |           |          |       |      | 0.0539755034253685  |
| GO:0070252                          | 7                            | 42                                                           | 7.80225094085748e-14 | 221.476923076923 | actin-mediated cell contraction                       |        |        |           |          |       |      | 0.0581274652273199  |
| GO:0030048                          | 7                            | 59                                                           | 9.73465781956882e-13 | 148.894970414201 | actin filament-based movement                         |        |        |           |          |       |      | 0.0816552487717113  |
| GO:0006936                          | 9                            | 239                                                          | 1.14193843371407e-11 | 50.5173913043478 | muscle contraction                                    |        |        |           |          |       |      | 0.330772956888797   |
| GO:0003012                          | 9                            | 266                                                          | 2.98289607788242e-11 | 45.1241598868058 | muscle system process                                 |        |        |           |          |       |      | 0.368140613106359   |
| GO:0030029                          | 9                            | 432                                                          | 2.20114025828332e-09 | 27.0947775628627 | actin filament-based process                          |        |        |           |          |       |      | 0.597882499481005   |
| GO:0006941                          | 4                            | 75                                                           | 3.04424438900589e-06 | 50.5633802816901 | striated muscle contraction                           |        |        |           |          |       |      | 0.103799045048786   |
| GO:0010927                          | 4                            | 123                                                          | 2.17896209326086e-05 | 30.0672268907563 | cellular component assembly involved in morphogenesis |        |        |           |          |       |      | 0.170230433880008   |
| GO:0043501                          | 2                            | 9                                                            | 6.51320731303245e-05 | 228.952380952381 | skeletal muscle adaptation                            |        |        |           |          |       |      | 0.0124558854058543  |
| GO:0014888                          | 2                            | 13                                                           | 0.000140651479709995 | 145.656565656566 | striated muscle adaptation                            |        |        |           |          |       |      | 0.0179918344751228  |
| GO:0061061                          | 5                            | 409                                                          | 0.000193326293867678 | 11.5734323432343 | muscle structure development                          |        |        |           |          |       |      | 0.56605079233271    |
| GO:0003009                          | 2                            | 19                                                           | 0.0003068190587918   | 94.2091503267974 | skeletal muscle contraction                           |        |        |           |          |       |      | 0.0262957580790257  |
| GO:0055002                          | 3                            | 107                                                          | 0.000410499840858156 | 24.3105203619909 | striated muscle cell development                      |        |        |           |          |       |      | 0.148086637602934   |
| GO:0050879                          | 2                            | 26                                                           | 0.000579757517178671 | 66.6990740740741 | multicellular organismal movement                     |        |        |           |          |       |      | 0.0359836689502457  |
| GO:0050881                          | 2                            | 26                                                           | 0.000579757517178671 | 66.6990740740741 | musculoskeletal movement                              |        |        |           |          |       |      | 0.0359836689502457  |
| GO:0007517                          | 4                            | 303                                                          | 0.00070401627756025  | 11.8160535117057 | muscle organ development                              |        |        |           |          |       |      | 0.419348141997094   |
| GO:0055001                          | 3                            | 129                                                          | 0.000708935535931096 | 20.0350140056022 | muscle cell development                               |        |        |           |          |       |      | 0.178534357483911   |
| GO:0030239                          | 2                            | 34                                                           | 0.000994130463345698 | 49.9965277777778 | myofibril assembly                                    |        |        |           |          |       |      | 0.0470555670887828  |
| GO:0007519                          | 3                            | 150                                                          | 0.00109773164116792  | 17.1476590636255 | skeletal muscle tissue development                    |        |        |           |          |       |      | 0.207598090097571   |
| GO:0043500                          | 2                            | 37                                                           | 0.00117726471214678  | 45.7015873015873 | muscle adaptation                                     |        |        |           |          |       |      | 0.0512075288907342  |
| GO:0060538                          | 3                            | 158                                                          | 0.00127518523706249  | 16.2535104364326 | skeletal muscle organ development                     |        |        |           |          |       |      | 0.218669988236108   |
| GO:0051146                          | 3                            | 169                                                          | 0.0015473561962559   | 15.1647767540751 | striated muscle cell differentiation                  |        |        |           |          |       |      | 0.233893848176597   |
| GO:0031032                          | 2                            | 45                                                           | 0.0017384182648659   | 37.1782945736434 | actomyosin structure organization                     |        |        |           |          |       |      | 0.0622794270292713  |
| GO:0030031                          | 3                            | 188                                                          | 0.00209851528895702  | 13.5891891891892 | cell projection assembly                              |        |        |           |          |       |      | 0.260189606255622   |
| GO:0042384                          | 2                            | 66                                                           | 0.00370160561663533  | 24.9427083333333 | cilium assembly                                       |        |        |           |          |       |      | 0.0913431596429313  |
| GO:0030035                          | 1                            | 3                                                            | 0.00414650474202016  | 379.710526315789 | microspike assembly                                   |        |        |           |          |       |      | 0.00415196180195142 |
| GO:0032066                          | 1                            | 3                                                            | 0.00414650474202016  | 379.710526315789 | nucleolus to nucleoplasm transport                    |        |        |           |          |       |      | 0.00415196180195142 |
| GO:0042396                          |                              |                                                              | 0.00414650474202016  | 379.710526315789 |                                                       |        |        |           |          |       |      | 0.00415196180195142 |



Stable4\_20PerPair

|                                             |        |                                                                                                                           |                   |                     |       |                   |         |          |           |
|---------------------------------------------|--------|---------------------------------------------------------------------------------------------------------------------------|-------------------|---------------------|-------|-------------------|---------|----------|-----------|
| 1                                           | 3      | phosphagen biosynthetic process                                                                                           |                   |                     |       |                   |         |          |           |
| GO:0048741                                  |        | 0.0041537626724066                                                                                                        | 23.468954248366   | 0.0968791087121998  |       |                   |         |          | 2         |
| 70                                          |        | skeletal muscle fiber development                                                                                         |                   |                     |       |                   |         |          |           |
| GO:0042692                                  |        | 0.00438294808678494                                                                                                       | 10.3905296558457  | 0.337692893225382   |       |                   |         |          |           |
| 3                                           | 244    | muscle cell differentiation                                                                                               |                   |                     |       |                   |         |          |           |
| GO:0048747                                  |        | 0.00525994507921223                                                                                                       | 20.7128427128427  | 0.109334994118054   |       |                   |         |          |           |
| 2                                           | 79     | muscle fiber development                                                                                                  |                   |                     |       |                   |         |          |           |
| GO:0014706                                  |        | 0.00534538779923922                                                                                                       | 9.65614353849648  | 0.362604664037091   |       |                   |         |          |           |
| 3                                           | 262    | striated muscle tissue development                                                                                        |                   |                     |       |                   |         |          |           |
| GO:0003010                                  |        | 0.00552503948074912                                                                                                       | 253.122807017544  | 0.00553594906926856 |       |                   |         |          |           |
| 1                                           | 4      | voluntary skeletal muscle contraction                                                                                     |                   |                     |       |                   |         |          |           |
| GO:0014721                                  |        | 0.00552503948074912                                                                                                       | 253.122807017544  | 0.00553594906926856 |       |                   |         |          |           |
| 1                                           | 4      | twitch skeletal muscle contraction                                                                                        |                   |                     |       |                   |         |          |           |
| GO:0060537                                  |        | 0.00599176048850142                                                                                                       | 9.255555555555556 | 0.377828523977579   |       |                   |         |          |           |
| 3                                           | 273    | muscle tissue development                                                                                                 |                   |                     |       |                   |         |          |           |
| GO:0060271                                  |        | 0.00634458151023876                                                                                                       | 18.7529411764706  | 0.120406892256591   |       |                   |         |          |           |
| 2                                           | 87     | cilium morphogenesis                                                                                                      |                   |                     |       |                   |         |          |           |
| GO:0001778                                  |        | 0.00690176123684949                                                                                                       | 189.828947368421  | 0.0069199363365857  |       |                   |         |          |           |
| 1                                           | 5      | plasma membrane repair                                                                                                    |                   |                     |       |                   |         |          |           |
| GO:0030240                                  |        | 0.00690176123684949                                                                                                       | 189.828947368421  | 0.0069199363365857  |       |                   |         |          |           |
| 1                                           | 5      | skeletal muscle thin filament assembly                                                                                    |                   |                     |       |                   |         |          |           |
| GO:0060315                                  |        | 0.00690176123684949                                                                                                       | 189.828947368421  | 0.0069199363365857  |       |                   |         |          |           |
| 1                                           | 5      | negative regulation of ryanodine-sensitive calcium-release channel activity                                               |                   |                     |       |                   |         |          |           |
| GO:0032412                                  |        | 0.00798790870288432                                                                                                       | 16.5914351851852  | 0.13563075219708    |       |                   |         |          |           |
| 2                                           | 98     | regulation of ion transmembrane transporter activity                                                                      |                   |                     |       |                   |         |          |           |
| GO:0000244                                  |        | 0.00827667226933348                                                                                                       | 151.852631578947  | 0.00830392360390284 |       |                   |         |          |           |
| 1                                           | 6      | assembly of spliceosomal tri-snRNP                                                                                        |                   |                     |       |                   |         |          |           |
| GO:0014866                                  |        | 0.00827667226933348                                                                                                       | 151.852631578947  | 0.00830392360390284 |       |                   |         |          |           |
| 1                                           | 6      | skeletal myofibril assembly                                                                                               |                   |                     |       |                   |         |          |           |
| GO:0022898                                  |        | 0.00879180462379007                                                                                                       | 15.7645764576458  | 0.142550688533665   |       |                   |         |          |           |
| 2                                           | 103    | regulation of transmembrane transporter activity                                                                          |                   |                     |       |                   |         |          |           |
| GO:1901020                                  |        | 0.00964977483455431                                                                                                       | 126.535087719298  | 0.00968791087121998 |       |                   |         |          |           |
| 1                                           | 7      | negative regulation of calcium ion transmembrane transporter activity                                                     |                   |                     |       |                   |         |          |           |
| GO:0034765                                  |        | 0.0098025252408953                                                                                                        | 14.8743509865005  | 0.150854612137568   |       |                   |         |          |           |
| 2                                           | 109    | regulation of ion transmembrane transport                                                                                 |                   |                     |       |                   |         |          |           |
| Tissue: Skin_Sun_Exposed_Lower_leg=>Thyroid |        |                                                                                                                           | Type: asymmetric  |                     |       |                   |         |          |           |
| SourceGene:                                 |        | TCF4(ENSG00000196628.7)                                                                                                   |                   |                     |       |                   |         |          |           |
| TargetGeneSet:                              |        | KCNAB2                                                                                                                    | WBP1              | FTH1P22             | RP4   | IGKJ4             | IGKV1-8 | IGKV1-17 |           |
| IGKV3-20                                    |        | IGKV1-27                                                                                                                  |                   | CD28                | ICOS  | ARL4C             | PDCD1   | SIDT1    | DTHD1 U6  |
| IGBP1P4                                     | RP11   | LHFPL3                                                                                                                    | PNOC              | TCTN1               | IGHG2 | IGHGP             | IGHG1   | IGHV2-26 |           |
| IGHV4-31                                    |        | IGHV3-33                                                                                                                  |                   | IGHV4-61            |       | IGHV3-74          |         | JMJD8    | TBL3 GCSH |
| TNFRSF13B                                   |        | PLD6                                                                                                                      | ATP9B             | ZSCAN18             | ZBP1  | IGLV3-25          |         | IGLV2-14 |           |
| IGLC2                                       | IGLC3  | MIAT                                                                                                                      | TNFRSF13C         | BEX2                | MTCP1 |                   |         |          |           |
| GOBPID                                      | Pvalue | OddsRatio                                                                                                                 | ExpCount          | Count               | Size  | Term              |         |          |           |
| GO:0006959                                  |        | 3.97227453570534e-11                                                                                                      | 52.8531855955679  |                     |       | 0.227942702927133 |         |          |           |
| 8                                           | 122    | humoral immune response                                                                                                   |                   |                     |       |                   |         |          |           |
| GO:0050778                                  |        | 1.16111174280658e-08                                                                                                      | 19.8154929577465  |                     |       | 0.680091343159643 |         |          |           |
| 9                                           | 364    | positive regulation of immune response                                                                                    |                   |                     |       |                   |         |          |           |
| GO:0002449                                  |        | 1.77391227425219e-08                                                                                                      | 31.2025           | 0.312019929416649   |       | 7                 | 167     |          |           |
| lymphocyte mediated immunity                |        |                                                                                                                           |                   |                     |       |                   |         |          |           |
| GO:0006958                                  |        | 3.0780705661675e-08                                                                                                       | 72.6212121212121  |                     |       | 0.093419140543907 |         |          |           |
| 5                                           | 50     | complement activation, classical pathway                                                                                  |                   |                     |       |                   |         |          |           |
| GO:0002460                                  |        | 3.09440229672954e-08                                                                                                      | 28.6637931034483  |                     |       | 0.338177288768943 |         |          |           |
| 7                                           | 181    | adaptive immune response based on somatic recombination of immune receptors built from immunoglobulin superfamily domains |                   |                     |       |                   |         |          |           |
| GO:0016064                                  |        | 4.65226895787969e-08                                                                                                      | 38.9632653061225  |                     |       | 0.207390492007474 |         |          |           |
| 6                                           | 111    | immunoglobulin mediated immune response                                                                                   |                   |                     |       |                   |         |          |           |
| GO:0019724                                  |        | 5.45911568725853e-08                                                                                                      | 37.8730158730159  |                     |       | 0.212995640440108 |         |          |           |
| 6                                           | 114    | B cell mediated immunity                                                                                                  |                   |                     |       |                   |         |          |           |
| GO:0002250                                  |        | 5.73973811363212e-08                                                                                                      | 26.0814136125654  |                     |       | 0.369939796553872 |         |          |           |
| 7                                           | 198    | adaptive immune response                                                                                                  |                   |                     |       |                   |         |          |           |

Stable4\_20PerPair

|            |                      |                                                                |                    |
|------------|----------------------|----------------------------------------------------------------|--------------------|
| GO:0002443 | 8.87587889384766e-08 | 24.3970588235294                                               | 0.394228773095288  |
| 7          | 211                  | leukocyte mediated immunity                                    |                    |
| GO:0006956 | 1.00439134449161e-07 | 56.2931034482759                                               | 0.117708117085323  |
| 5          | 63                   | complement activation                                          |                    |
| GO:0002455 | 1.1773038054287e-07  | 54.4090909090909                                               | 0.121444882707079  |
| 5          | 65                   | humoral immune response mediated by circulating immunoglobulin |                    |
| GO:0072376 | 3.80586713500269e-07 | 42.3465171192444                                               | 0.153207390492007  |
| 5          | 82                   | protein activation cascade                                     |                    |
| GO:0002252 | 5.14043064091848e-06 | 12.9703166226913                                               | 0.721195764998962  |
| 7          | 386                  | immune effector process                                        |                    |
| GO:0031294 | 1.07278252023149e-05 | 35.1573790569504                                               | 0.140128710815861  |
| 4          | 75                   | lymphocyte costimulation                                       |                    |
| GO:0031295 | 1.07278252023149e-05 | 35.1573790569504                                               | 0.140128710815861  |
| 4          | 75                   | T cell costimulation                                           |                    |
| GO:0050864 | 1.45726414017468e-05 | 32.4042913608131                                               | 0.151339007681129  |
| 4          | 81                   | regulation of B cell activation                                |                    |
| GO:0002253 | 1.53118039550086e-05 | 13.7796196977084                                               | 0.558646460452564  |
| 6          | 299                  | activation of immune response                                  |                    |
| GO:0030888 | 0.000107522759101617 | 38.2367021276596                                               | 0.093419140543907  |
| 3          | 50                   | regulation of B cell proliferation                             |                    |
| GO:0046649 | 0.000121146566979257 | 9.36567413850786                                               | 0.809009757110235  |
| 6          | 433                  | lymphocyte activation                                          |                    |
| GO:0050670 | 0.000138856518445971 | 17.744099378882                                                | 0.269047124766452  |
| 144        |                      | regulation of lymphocyte proliferation                         | 4                  |
| GO:0032944 | 0.000142613770045866 | 17.6170212765957                                               | 0.27091550757733   |
| 4          | 145                  | regulation of mononuclear cell proliferation                   |                    |
| GO:0051249 | 0.000157604446247797 | 11.5647482014388                                               | 0.528752335478514  |
| 5          | 283                  | regulation of lymphocyte activation                            |                    |
| GO:0042100 | 0.000159123490207166 | 33.2638888888889                                               | 0.106497820220054  |
| 3          | 57                   | B cell proliferation                                           |                    |
| GO:0070663 | 0.000162515447931474 | 17.0077427039905                                               | 0.280257421631721  |
| 4          | 150                  | regulation of leukocyte proliferation                          |                    |
| GO:0042113 | 0.00017538004703184  | 16.6618033265247                                               | 0.285862570064355  |
| 4          | 153                  | B cell activation                                              |                    |
| GO:0045066 | 0.000219333509983732 | 115.312                                                        | 0.0224205937305377 |
|            |                      | regulatory T cell differentiation                              | 2 12               |
| GO:0030889 | 0.000258913610471625 | 104.821818181818                                               | 0.0242889765414158 |
| 2          | 13                   | negative regulation of B cell proliferation                    |                    |
| GO:0050870 | 0.000268566108079728 | 14.8471752147878                                               | 0.319493460660162  |
| 4          | 171                  | positive regulation of T cell activation                       |                    |
| GO:0046651 | 0.000274610196078045 | 14.7577639751553                                               | 0.32136184347104   |
| 4          | 172                  | lymphocyte proliferation                                       |                    |
| GO:0042110 | 0.000275018514558874 | 10.2127967573827                                               | 0.596014116670127  |
| 5          | 319                  | T cell activation                                              |                    |
| GO:0002694 | 0.000283079927967113 | 10.1467203682394                                               | 0.599750882291883  |
| 5          | 321                  | regulation of leukocyte activation                             |                    |
| GO:0032943 | 0.000286991449531745 | 14.5820971867008                                               | 0.325098609092796  |
| 4          | 174                  | mononuclear cell proliferation                                 |                    |
| GO:0070661 | 0.000340560941099582 | 13.9189057156815                                               | 0.340045671579821  |
| 4          | 182                  | leukocyte proliferation                                        |                    |
| GO:0050865 | 0.000384162560432835 | 9.47149004841313                                               | 0.640855304131202  |
| 5          | 343                  | regulation of cell activation                                  |                    |
| GO:0001782 | 0.00050495018454502  | 72.04                                                          | 0.0336308905958065 |
|            |                      | B cell homeostasis                                             | 2 18               |
| GO:0042035 | 0.000633305008731961 | 20.3636363636364                                               | 0.170022835789911  |
| 3          | 91                   | regulation of cytokine biosynthetic process                    |                    |
| GO:0051251 | 0.000639167222562705 | 11.714815577993                                                | 0.4017023043388    |
|            |                      | positive regulation of lymphocyte activation                   | 4 215              |
| GO:0050863 | 0.000708663573971892 | 11.3860949709477                                               | 0.412912601204069  |
| 4          | 221                  | regulation of T cell activation                                |                    |
| GO:0042089 | 0.000833567862006689 | 18.4626288659794                                               | 0.186838281087814  |
| 3          | 100                  | cytokine biosynthetic process                                  |                    |
| GO:0002696 | 0.000863502941305667 | 10.780330358838                                                | 0.435333194934607  |
|            |                      |                                                                | 4                  |

Stable4\_20PerPair

|            |                                                               |                                                                                                                                         |                    |  |  |  |   |                     |     |
|------------|---------------------------------------------------------------|-----------------------------------------------------------------------------------------------------------------------------------------|--------------------|--|--|--|---|---------------------|-----|
| 233        | positive regulation of leukocyte activation                   |                                                                                                                                         |                    |  |  |  |   |                     |     |
| GO:0042107 | 0.000882920450586887                                          | 18.087121212121212                                                                                                                      |                    |  |  |  |   | 0.19057504670957    |     |
| 3          | 102                                                           | cytokine metabolic process                                                                                                              |                    |  |  |  |   |                     |     |
| GO:0050867 | 0.00096413679721674                                           | 10.4554163596168                                                                                                                        |                    |  |  |  |   | 0.448411874610754   |     |
| 4          | 240                                                           | positive regulation of cell activation                                                                                                  |                    |  |  |  |   |                     |     |
| GO:0050869 | 0.00106276642474843                                           | 48                                                                                                                                      | 0.0485779530828316 |  |  |  | 2 |                     | 26  |
|            | negative regulation of B cell activation                      |                                                                                                                                         |                    |  |  |  |   |                     |     |
| GO:0002260 | 0.00250987280221428                                           | 30.2863157894737                                                                                                                        |                    |  |  |  |   | 0.0747353124351256  |     |
| 2          | 40                                                            | lymphocyte homeostasis                                                                                                                  |                    |  |  |  |   |                     |     |
| GO:0001776 | 0.00374516579797624                                           | 24.4714893617021                                                                                                                        |                    |  |  |  |   | 0.0915507577330289  |     |
| 2          | 49                                                            | leukocyte homeostasis                                                                                                                   |                    |  |  |  |   |                     |     |
| GO:0032945 | 0.00374516579797624                                           | 24.4714893617021                                                                                                                        |                    |  |  |  |   | 0.0915507577330289  |     |
| 2          | 49                                                            | negative regulation of mononuclear cell proliferation                                                                                   |                    |  |  |  |   |                     |     |
| GO:0050672 | 0.00374516579797624                                           | 24.4714893617021                                                                                                                        |                    |  |  |  |   | 0.0915507577330289  |     |
| 2          | 49                                                            | negative regulation of lymphocyte proliferation                                                                                         |                    |  |  |  |   |                     |     |
| GO:0070664 | 0.00420833512253117                                           | 22.9984                                                                                                                                 | 0.0971559061656633 |  |  |  | 2 |                     | 52  |
|            | negative regulation of leukocyte proliferation                |                                                                                                                                         |                    |  |  |  |   |                     |     |
| GO:0050871 | 0.00453115282243661                                           | 22.1107692307692                                                                                                                        |                    |  |  |  |   | 0.10089267178742    |     |
| 2          | 54                                                            | positive regulation of B cell activation                                                                                                |                    |  |  |  |   |                     |     |
| GO:0042108 | 0.00538673529853182                                           | 20.1642105263158                                                                                                                        |                    |  |  |  |   | 0.11023458584181    |     |
| 2          | 59                                                            | positive regulation of cytokine biosynthetic process                                                                                    |                    |  |  |  |   |                     |     |
| GO:0002636 | 0.00559506886110994                                           | 277.346153846154                                                                                                                        |                    |  |  |  |   | 0.00560514843263442 |     |
| 1          | 3                                                             | positive regulation of germinal center formation                                                                                        |                    |  |  |  |   |                     |     |
| GO:0015917 | 0.00559506886110994                                           | 277.346153846154                                                                                                                        |                    |  |  |  |   | 0.00560514843263442 |     |
| 1          | 3                                                             | aminophospholipid transport                                                                                                             |                    |  |  |  |   |                     |     |
| GO:0016056 | 0.00559506886110994                                           | 277.346153846154                                                                                                                        |                    |  |  |  |   | 0.00560514843263442 |     |
| 1          | 3                                                             | rhodopsin mediated signaling pathway                                                                                                    |                    |  |  |  |   |                     |     |
| GO:0045590 | 0.00559506886110994                                           | 277.346153846154                                                                                                                        |                    |  |  |  |   | 0.00560514843263442 |     |
| 1          | 3                                                             | negative regulation of regulatory T cell differentiation                                                                                |                    |  |  |  |   |                     |     |
| GO:0042102 | 0.00669906381624608                                           | 17.95                                                                                                                                   | 0.123313265517957  |  |  |  | 2 |                     | 66  |
|            | positive regulation of T cell proliferation                   |                                                                                                                                         |                    |  |  |  |   |                     |     |
| GO:0002706 | 0.00814189961126811                                           | 16.1723943661972                                                                                                                        |                    |  |  |  |   | 0.136391945194104   |     |
| 2          | 73                                                            | regulation of lymphocyte mediated immunity                                                                                              |                    |  |  |  |   |                     |     |
| GO:0007028 | 0.00930835421207143                                           | 138.653846153846                                                                                                                        |                    |  |  |  |   | 0.0093419140543907  |     |
| 1          | 5                                                             | cytoplasm organization                                                                                                                  |                    |  |  |  |   |                     |     |
| GO:0070934 | 0.00930835421207143                                           | 138.653846153846                                                                                                                        |                    |  |  |  |   | 0.0093419140543907  |     |
| 1          | 5                                                             | CRD-mediated mRNA stabilization                                                                                                         |                    |  |  |  |   |                     |     |
| GO:0002822 | 0.00971188231026789                                           | 14.7138461538462                                                                                                                        |                    |  |  |  |   | 0.149470624870251   |     |
| 2          | 80                                                            | regulation of adaptive immune response based on somatic recombination of immune receptors built from immunoglobulin superfamily domains |                    |  |  |  |   |                     |     |
|            | Tissue: Skin_Sun_Exposed_Lower_leg=>Thyroid                   | Type: cluster                                                                                                                           |                    |  |  |  |   |                     |     |
|            | SourceGene: TCF4(ENSG00000196628.7)                           |                                                                                                                                         |                    |  |  |  |   |                     |     |
|            | TargetGeneSet: KCNAB2 WBP1 FTH1P22 RP4 IGKJ4 IGKV1-8 IGKV1-17 |                                                                                                                                         |                    |  |  |  |   |                     |     |
|            | IGKV3-20 IGKV1-27 CD28 ICOS ARL4C PDCD1 SIDT1 DTHD1 U6        |                                                                                                                                         |                    |  |  |  |   |                     |     |
|            | IGBP1P4 RP11 LHFPL3 PNOC TCTN1 IGHG2 IGHGP IGHG1 IGHV2-26     |                                                                                                                                         |                    |  |  |  |   |                     |     |
|            | IGHV4-31 IGHV3-33 IGHV4-61 IGHV3-74 JMJD8 TBL3 GCSH           |                                                                                                                                         |                    |  |  |  |   |                     |     |
|            | TNFRSF13B PLD6 ATP9B ZSCAN18 ZBP1 IGLV3-25 IGLV2-14           |                                                                                                                                         |                    |  |  |  |   |                     |     |
|            | IGLC2 IGLC3 MIAT TNFRSF13C BEX2 MTCP1                         |                                                                                                                                         |                    |  |  |  |   |                     |     |
|            | GOBPID Pvalue OddsRatio ExpCount Count Size Term              |                                                                                                                                         |                    |  |  |  |   |                     |     |
| GO:0006959 | 3.97227453570534e-11                                          | 52.8531855955679                                                                                                                        |                    |  |  |  |   | 0.227942702927133   |     |
| 8          | 122                                                           | humoral immune response                                                                                                                 |                    |  |  |  |   |                     |     |
| GO:0050778 | 1.16111174280658e-08                                          | 19.8154929577465                                                                                                                        |                    |  |  |  |   | 0.680091343159643   |     |
| 9          | 364                                                           | positive regulation of immune response                                                                                                  |                    |  |  |  |   |                     |     |
| GO:0002449 | 1.77391227425219e-08                                          | 31.2025                                                                                                                                 | 0.312019929416649  |  |  |  | 7 |                     | 167 |
|            | lymphocyte mediated immunity                                  |                                                                                                                                         |                    |  |  |  |   |                     |     |
| GO:0006958 | 3.0780705661675e-08                                           | 72.6212121212121                                                                                                                        |                    |  |  |  |   | 0.093419140543907   |     |
| 5          | 50                                                            | complement activation, classical pathway                                                                                                |                    |  |  |  |   |                     |     |
| GO:0002460 | 3.09440229672954e-08                                          | 28.6637931034483                                                                                                                        |                    |  |  |  |   | 0.338177288768943   |     |
| 7          | 181                                                           | adaptive immune response based on somatic recombination of immune receptors built from immunoglobulin superfamily domains               |                    |  |  |  |   |                     |     |
| GO:0016064 | 4.65226895787969e-08                                          | 38.9632653061225                                                                                                                        |                    |  |  |  |   | 0.207390492007474   |     |
| 6          | 111                                                           | immunoglobulin mediated immune response                                                                                                 |                    |  |  |  |   |                     |     |
| GO:0019724 | 5.45911568725853e-08                                          | 37.8730158730159                                                                                                                        |                    |  |  |  |   | 0.212995640440108   |     |

Stable4\_20PerPair

|            |     |                                                                |                  |                    |   |                    |      |
|------------|-----|----------------------------------------------------------------|------------------|--------------------|---|--------------------|------|
| 6          | 114 | B cell mediated immunity                                       |                  |                    |   |                    |      |
| GO:0002250 |     | 5.73973811363212e-08                                           | 26.0814136125654 |                    |   | 0.369939796553872  |      |
| 7          | 198 | adaptive immune response                                       |                  |                    |   |                    |      |
| GO:0002443 |     | 8.87587889384766e-08                                           | 24.3970588235294 |                    |   | 0.394228773095288  |      |
| 7          | 211 | leukocyte mediated immunity                                    |                  |                    |   |                    |      |
| GO:0006956 |     | 1.00439134449161e-07                                           | 56.2931034482759 |                    |   | 0.117708117085323  |      |
| 5          | 63  | complement activation                                          |                  |                    |   |                    |      |
| GO:0002455 |     | 1.1773038054287e-07                                            | 54.4090909090909 |                    |   | 0.121444882707079  |      |
| 5          | 65  | humoral immune response mediated by circulating immunoglobulin |                  |                    |   |                    |      |
| GO:0072376 |     | 3.80586713500269e-07                                           | 42.3465171192444 |                    |   | 0.153207390492007  |      |
| 5          | 82  | protein activation cascade                                     |                  |                    |   |                    |      |
| GO:0002252 |     | 5.14043064091848e-06                                           | 12.9703166226913 |                    |   | 0.721195764998962  |      |
| 7          | 386 | immune effector process                                        |                  |                    |   |                    |      |
| GO:0031294 |     | 1.07278252023149e-05                                           | 35.1573790569504 |                    |   | 0.140128710815861  |      |
| 4          | 75  | lymphocyte costimulation                                       |                  |                    |   |                    |      |
| GO:0031295 |     | 1.07278252023149e-05                                           | 35.1573790569504 |                    |   | 0.140128710815861  |      |
| 4          | 75  | T cell costimulation                                           |                  |                    |   |                    |      |
| GO:0050864 |     | 1.45726414017468e-05                                           | 32.4042913608131 |                    |   | 0.151339007681129  |      |
| 4          | 81  | regulation of B cell activation                                |                  |                    |   |                    |      |
| GO:0002253 |     | 1.53118039550086e-05                                           | 13.7796196977084 |                    |   | 0.558646460452564  |      |
| 6          | 299 | activation of immune response                                  |                  |                    |   |                    |      |
| GO:0030888 |     | 0.000107522759101617                                           | 38.2367021276596 |                    |   | 0.093419140543907  |      |
| 3          | 50  | regulation of B cell proliferation                             |                  |                    |   |                    |      |
| GO:0046649 |     | 0.000121146566979257                                           | 9.36567413850786 |                    |   | 0.809009757110235  |      |
| 6          | 433 | lymphocyte activation                                          |                  |                    |   |                    |      |
| GO:0050670 |     | 0.000138856518445971                                           | 17.744099378882  | 0.269047124766452  |   |                    | 4    |
| 144        |     | regulation of lymphocyte proliferation                         |                  |                    |   |                    |      |
| GO:0032944 |     | 0.000142613770045866                                           | 17.6170212765957 |                    |   | 0.27091550757733   |      |
| 4          | 145 | regulation of mononuclear cell proliferation                   |                  |                    |   |                    |      |
| GO:0051249 |     | 0.000157604446247797                                           | 11.5647482014388 |                    |   | 0.528752335478514  |      |
| 5          | 283 | regulation of lymphocyte activation                            |                  |                    |   |                    |      |
| GO:0042100 |     | 0.000159123490207166                                           | 33.2638888888889 |                    |   | 0.106497820220054  |      |
| 3          | 57  | B cell proliferation                                           |                  |                    |   |                    |      |
| GO:0070663 |     | 0.000162515447931474                                           | 17.0077427039905 |                    |   | 0.280257421631721  |      |
| 4          | 150 | regulation of leukocyte proliferation                          |                  |                    |   |                    |      |
| GO:0042113 |     | 0.00017538004703184                                            | 16.6618033265247 |                    |   | 0.285862570064355  |      |
| 4          | 153 | B cell activation                                              |                  |                    |   |                    |      |
| GO:0045066 |     | 0.000219333509983732                                           | 115.312          | 0.0224205937305377 |   |                    | 2 12 |
|            |     | regulatory T cell differentiation                              |                  |                    |   |                    |      |
| GO:0030889 |     | 0.000258913610471625                                           | 104.821818181818 |                    |   | 0.0242889765414158 |      |
| 2          | 13  | negative regulation of B cell proliferation                    |                  |                    |   |                    |      |
| GO:0050870 |     | 0.000268566108079728                                           | 14.8471752147878 |                    |   | 0.319493460660162  |      |
| 4          | 171 | positive regulation of T cell activation                       |                  |                    |   |                    |      |
| GO:0046651 |     | 0.000274610196078045                                           | 14.7577639751553 |                    |   | 0.32136184347104   |      |
| 4          | 172 | lymphocyte proliferation                                       |                  |                    |   |                    |      |
| GO:0042110 |     | 0.000275018514558874                                           | 10.2127967573827 |                    |   | 0.596014116670127  |      |
| 5          | 319 | T cell activation                                              |                  |                    |   |                    |      |
| GO:0002694 |     | 0.000283079927967113                                           | 10.1467203682394 |                    |   | 0.599750882291883  |      |
| 5          | 321 | regulation of leukocyte activation                             |                  |                    |   |                    |      |
| GO:0032943 |     | 0.000286991449531745                                           | 14.5820971867008 |                    |   | 0.325098609092796  |      |
| 4          | 174 | mononuclear cell proliferation                                 |                  |                    |   |                    |      |
| GO:0070661 |     | 0.000340560941099582                                           | 13.9189057156815 |                    |   | 0.340045671579821  |      |
| 4          | 182 | leukocyte proliferation                                        |                  |                    |   |                    |      |
| GO:0050865 |     | 0.000384162560432835                                           | 9.47149004841313 |                    |   | 0.640855304131202  |      |
| 5          | 343 | regulation of cell activation                                  |                  |                    |   |                    |      |
| GO:0001782 |     | 0.00050495018454502                                            | 72.04            | 0.0336308905958065 |   |                    | 2 18 |
|            |     | B cell homeostasis                                             |                  |                    |   |                    |      |
| GO:0042035 |     | 0.000633305008731961                                           | 20.3636363636364 |                    |   | 0.170022835789911  |      |
| 3          | 91  | regulation of cytokine biosynthetic process                    |                  |                    |   |                    |      |
| GO:0051251 |     | 0.000639167222562705                                           | 11.714815577993  | 0.4017023043388    | 4 |                    | 215  |
|            |     | positive regulation of lymphocyte activation                   |                  |                    |   |                    |      |
| GO:0050863 |     | 0.000708663573971892                                           | 11.3860949709477 |                    |   | 0.412912601204069  |      |
| 4          | 221 | regulation of T cell activation                                |                  |                    |   |                    |      |

Stable4\_20PerPair

|                                                |                                                                                                                                         |                            |                     |          |         |         |          |           |           |      |
|------------------------------------------------|-----------------------------------------------------------------------------------------------------------------------------------------|----------------------------|---------------------|----------|---------|---------|----------|-----------|-----------|------|
| GO:0042089                                     | 0.000833567862006689                                                                                                                    | 18.4626288659794           | 0.186838281087814   |          |         |         |          |           |           |      |
| 3 100                                          | cytokine biosynthetic process                                                                                                           |                            |                     |          |         |         |          |           |           |      |
| GO:0002696                                     | 0.000863502941305667                                                                                                                    | 10.780330358838            | 0.435333194934607 4 |          |         |         |          |           |           |      |
| 233                                            | positive regulation of leukocyte activation                                                                                             |                            |                     |          |         |         |          |           |           |      |
| GO:0042107                                     | 0.000882920450586887                                                                                                                    | 18.0871212121212           | 0.19057504670957    |          |         |         |          |           |           |      |
| 3 102                                          | cytokine metabolic process                                                                                                              |                            |                     |          |         |         |          |           |           |      |
| GO:0050867                                     | 0.00096413679721674                                                                                                                     | 10.4554163596168           | 0.448411874610754   |          |         |         |          |           |           |      |
| 4 240                                          | positive regulation of cell activation                                                                                                  |                            |                     |          |         |         |          |           |           |      |
| GO:0050869                                     | 0.00106276642474843                                                                                                                     | 48 0.0485779530828316      | 2 26                |          |         |         |          |           |           |      |
| negative regulation of B cell activation       |                                                                                                                                         |                            |                     |          |         |         |          |           |           |      |
| GO:0002260                                     | 0.00250987280221428                                                                                                                     | 30.2863157894737           | 0.0747353124351256  |          |         |         |          |           |           |      |
| 2 40                                           | lymphocyte homeostasis                                                                                                                  |                            |                     |          |         |         |          |           |           |      |
| GO:0001776                                     | 0.00374516579797624                                                                                                                     | 24.4714893617021           | 0.0915507577330289  |          |         |         |          |           |           |      |
| 2 49                                           | leukocyte homeostasis                                                                                                                   |                            |                     |          |         |         |          |           |           |      |
| GO:0032945                                     | 0.00374516579797624                                                                                                                     | 24.4714893617021           | 0.0915507577330289  |          |         |         |          |           |           |      |
| 2 49                                           | negative regulation of mononuclear cell proliferation                                                                                   |                            |                     |          |         |         |          |           |           |      |
| GO:0050672                                     | 0.00374516579797624                                                                                                                     | 24.4714893617021           | 0.0915507577330289  |          |         |         |          |           |           |      |
| 2 49                                           | negative regulation of lymphocyte proliferation                                                                                         |                            |                     |          |         |         |          |           |           |      |
| GO:0070664                                     | 0.00420833512253117                                                                                                                     | 22.9984 0.0971559061656633 | 2 52                |          |         |         |          |           |           |      |
| negative regulation of leukocyte proliferation |                                                                                                                                         |                            |                     |          |         |         |          |           |           |      |
| GO:0050871                                     | 0.00453115282243661                                                                                                                     | 22.1107692307692           | 0.10089267178742    |          |         |         |          |           |           |      |
| 2 54                                           | positive regulation of B cell activation                                                                                                |                            |                     |          |         |         |          |           |           |      |
| GO:0042108                                     | 0.00538673529853182                                                                                                                     | 20.1642105263158           | 0.11023458584181    |          |         |         |          |           |           |      |
| 2 59                                           | positive regulation of cytokine biosynthetic process                                                                                    |                            |                     |          |         |         |          |           |           |      |
| GO:0002636                                     | 0.00559506886110994                                                                                                                     | 277.346153846154           | 0.00560514843263442 |          |         |         |          |           |           |      |
| 1 3                                            | positive regulation of germinal center formation                                                                                        |                            |                     |          |         |         |          |           |           |      |
| GO:0015917                                     | 0.00559506886110994                                                                                                                     | 277.346153846154           | 0.00560514843263442 |          |         |         |          |           |           |      |
| 1 3                                            | aminophospholipid transport                                                                                                             |                            |                     |          |         |         |          |           |           |      |
| GO:0016056                                     | 0.00559506886110994                                                                                                                     | 277.346153846154           | 0.00560514843263442 |          |         |         |          |           |           |      |
| 1 3                                            | rhodopsin mediated signaling pathway                                                                                                    |                            |                     |          |         |         |          |           |           |      |
| GO:0045590                                     | 0.00559506886110994                                                                                                                     | 277.346153846154           | 0.00560514843263442 |          |         |         |          |           |           |      |
| 1 3                                            | negative regulation of regulatory T cell differentiation                                                                                |                            |                     |          |         |         |          |           |           |      |
| GO:0042102                                     | 0.00669906381624608                                                                                                                     | 17.95 0.123313265517957    | 2 66                |          |         |         |          |           |           |      |
| positive regulation of T cell proliferation    |                                                                                                                                         |                            |                     |          |         |         |          |           |           |      |
| GO:0002706                                     | 0.00814189961126811                                                                                                                     | 16.1723943661972           | 0.136391945194104   |          |         |         |          |           |           |      |
| 2 73                                           | regulation of lymphocyte mediated immunity                                                                                              |                            |                     |          |         |         |          |           |           |      |
| GO:0007028                                     | 0.00930835421207143                                                                                                                     | 138.653846153846           | 0.0093419140543907  |          |         |         |          |           |           |      |
| 1 5                                            | cytoplasm organization                                                                                                                  |                            |                     |          |         |         |          |           |           |      |
| GO:0070934                                     | 0.00930835421207143                                                                                                                     | 138.653846153846           | 0.0093419140543907  |          |         |         |          |           |           |      |
| 1 5                                            | CRD-mediated mRNA stabilization                                                                                                         |                            |                     |          |         |         |          |           |           |      |
| GO:0002822                                     | 0.00971188231026789                                                                                                                     | 14.7138461538462           | 0.149470624870251   |          |         |         |          |           |           |      |
| 2 80                                           | regulation of adaptive immune response based on somatic recombination of immune receptors built from immunoglobulin superfamily domains |                            |                     |          |         |         |          |           |           |      |
| Tissue: whole_Blood=>Thyroid Type: asymmetric  |                                                                                                                                         |                            |                     |          |         |         |          |           |           |      |
| SourceGene:                                    | 7SK(ENSG00000223039.1)                                                                                                                  |                            |                     |          |         |         |          |           |           |      |
| TargetGeneSet:                                 | RP11                                                                                                                                    | ERRFI1                     | NMNAT1              | DFFA     | DNAJC16 | OTUD3   | XKR8     | MED18     |           |      |
| PRDX3P2                                        | FAM167B                                                                                                                                 | HDAC1                      | ZMYM1               | RNF220   | HHLA3   | DDAH1   | FRRS1    | CYB561D1  |           |      |
| DDX20                                          | BCL9                                                                                                                                    | GJA5                       | BOLA1               | GOLPH3L  | ARNT    | VPS72   | SHE      | LAMTOR2   | MNDA      |      |
| SLAMF8                                         | USP21                                                                                                                                   | FCGR3A                     | RNASEL              | SMG7     | TRMT1L  | ZNF281  | DISP1    | MIXL1     | C2orf44   | PREB |
| EHD3                                           | ARHGEF33                                                                                                                                |                            | MSH6                | PAPOLG   | SPR     | MRPL35  | ZNF2     | C2orf29   | POLR1B    | ORC2 |
| ICA1L                                          | PARD3B                                                                                                                                  | IDH1                       | SPAG16              | TMEM169  | TNP1    | MRPL44  | EIF4E2   | RNPEPL1   | RPUSD3    |      |
| CCRL1                                          | ZNF619                                                                                                                                  | ZNF620                     | CCR2                | DUSP7    | SCT     | ABHD10  | WDR52    | ADPRH     | MSL2      |      |
| SLC25A36                                       |                                                                                                                                         | ZBTB38                     | TRPC1               | SIAH2    | P2RY13  | TACC3   | SH3BP2   | TMEM128   | ZNF518B   |      |
| NFXL1                                          | UTP3                                                                                                                                    | IL8                        | CASP6               | ANKRD50  | TIGD4   | CCDC127 | LPCAT1   | BRIP1     | DAP       |      |
| C5orf51                                        | SLC38A9                                                                                                                                 | TRIM23                     | CD180               | CETN3    | SLC22A5 | AFF4    | SH3RF2   | TCERG1    | HMGXB3    |      |
| C5orf54                                        | NEURL1B                                                                                                                                 | DOK3                       | CTB                 | HIST1H3E |         | ZKSCAN4 | ZKSCAN3  | SCAND3    | MICB      | APOM |
| PFDN6                                          | ZBTB9                                                                                                                                   | NFYA                       | TAF8                | C6orf203 |         | TSPYL4  | AKAP12   | FAM103A2P |           |      |
| ELFN1                                          | RNF216P1                                                                                                                                |                            | COL28A1             | TRA2A    | VOPP1   | LAT2    | TMEM60   | SLC12A9   | GCC1      |      |
| TNPO3                                          | FAM131B                                                                                                                                 | EPHA1                      | ZNF786              | ZNF398   | GIMAP8  | GIMAP7  | GIMAP4   | ESYT2     | CTA       |      |
| SH2D4A                                         | CTD                                                                                                                                     | INTS9                      | PDP1                | WDR67    | KLHL38  | ZNF623  | TONSL    | ZNF250    | RANBP6    |      |
| KLHL9                                          | DCAF10                                                                                                                                  | C9orf85                    | C9orf40             | RMI1     | FOXE1   | RNF20   | C9orf80  | ATP6V1G1  |           |      |
| TRIM32                                         | PSMD5                                                                                                                                   | LHX6                       | ZBTB34              | NAIF1    | ABL1    | GTF3C4  | QSOX2    | NUDT5     | C10orf128 |      |
| ERCC6                                          | ADO                                                                                                                                     | MSS51                      | AP3M1               | ARHGAP19 |         | HIF1AN  | C10orf95 |           | SUFU      |      |

Stable4\_20PerPair

| GO:0006469           | GO:0010332                  | GO:0033673           | GO:0033233           | GO:0071901           | GO:0051348           | GO:0045356          | GO:0001933          | GO:0000122          | GO:0002282          | GO:0045349          | GO:0045354          | GO:0042326                             | GO:0010212                     | GO:0045736         | GO:0010563          | GO:0045936          | GO:0000244          | GO:0007256          | GO:0008630          | GO:0033235          | GO:0035970          |
|----------------------|-----------------------------|----------------------|----------------------|----------------------|----------------------|---------------------|---------------------|---------------------|---------------------|---------------------|---------------------|----------------------------------------|--------------------------------|--------------------|---------------------|---------------------|---------------------|---------------------|---------------------|---------------------|---------------------|
| 10                   | 34                          | 10                   | 3                    | 7                    | 10                   | 2                   | 10                  | 17                  | 2                   | 2                   | 2                   | 198                                    | 108                            | 3                  | 10                  | 10                  | 2                   | 2                   | 4                   | 2                   | 2                   |
| 142                  | response to gamma radiation | 151                  | 9                    | 82                   | 163                  | 4                   | 186                 | 430                 | 5                   | 5                   | 5                   | negative regulation of phosphorylation | response to ionizing radiation | 18                 | 203                 | 203                 | 6                   | 6                   | 38                  | 7                   | 7                   |
| 0.000279990173208074 | 0.000353325705541072        | 0.000457566102139861 | 0.000466732731923299 | 0.000742358201208229 | 0.000831268473669817 | 0.00194710386073015 | 0.00223963189042068 | 0.00240816445650831 | 0.00320605995974029 | 0.00320605995974029 | 0.00320605995974029 | 0.00351530233284685                    | 0.0036502089730963             | 0.0040144883875776 | 0.00419302704988163 | 0.00419302704988163 | 0.00475121374870953 | 0.00475121374870953 | 0.00493330491000203 | 0.00657176753387678 | 0.00657176753387678 |
| 173208074            | 25705541072                 | 102139861            | 731923299            | 201208229            | 473669817            | 10386073015         | 189042068           | 16445650831         | 05995974029         | 05995974029         | 05995974029         | 33284685                               | 2089730963                     | 144883875776       | 2704988163          | 2704988163          | 121374870953        | 121374870953        | 330491000203        | 176753387678        | 176753387678        |
| ExpCount             | ExpCount                    | ExpCount             | ExpCount             | ExpCount             | ExpCount             | ExpCount            | ExpCount            | ExpCount            | ExpCount            | ExpCount            | ExpCount            | ExpCount                               | ExpCount                       | ExpCount           | ExpCount            | ExpCount            | ExpCount            | ExpCount            | ExpCount            | ExpCount            | ExpCount            |
| 173208074            | 25705541072                 | 102139861            | 731923299            | 201208229            | 473669817            | 10386073015         | 189042068           | 16445650831         | 05995974029         | 05995974029         | 05995974029         | 33284685                               | 2089730963                     | 144883875776       | 2704988163          | 2704988163          | 121374870953        | 121374870953        | 330491000203        | 176753387678        | 176753387678        |
| 4.19201861130995     | 9.4248435627746             | 3.92192997151952     | 27.1666666666667     | 5.12498054474708     | 3.61123977149915     | 54.1412213740458    | 3.13417143879742    | 2.29541912146729    | 36.0916030534351    | 36.0916030534351    | 36.0916030534351    | 2.9316049589546                        | 3.7986670262357                | 10.8597701149425   | 2.85463669372935    | 2.85463669372935    | 27.0667938931298    | 27.0667938931298    | 6.40407239819005    | 21.6519083969466    | 21.6519083969466    |
| Count                | Count                       | Count                | Count                | Count                | Count                | Count               | Count               | Count               | Count               | Count               | Count               | Count                                  | Count                          | Count              | Count               | Count               | Count               | Count               | Count               | Count               | Count               |
| 1130995              | 27746                       | 151952               | 66667                | 4708                 | 149915               | 40458               | 79742               | 46729               | 34351               | 34351               | 34351               | 186008                                 | 262357                         | 1149425            | 72935               | 72935               | 1298                | 1298                | 19005               | 9466                | 9466                |
| Size                 | Size                        | Size                 | Size                 | Size                 | Size                 | Size                | Size                | Size                | Size                | Size                | Size                | Size                                   | Size                           | Size               | Size                | Size                | Size                | Size                | Size                | Size                | Size                |
| 1130995              | 27746                       | 151952               | 66667                | 4708                 | 149915               | 40458               | 79742               | 46729               | 34351               | 34351               | 34351               | 186008                                 | 262357                         | 1149425            | 72935               | 72935               | 1298                | 1298                | 19005               | 9466                | 9466                |
| Term                 | Term                        | Term                 | Term                 | Term                 | Term                 | Term                | Term                | Term                | Term                | Term                | Term                | Term                                   | Term                           | Term               | Term                | Term                | Term                | Term                | Term                | Term                | Term                |
| 2.59414573385925     | 0.621133485571933           | 2.75856342121652     | 0.164417687357276    | 1.49802781814407     | 2.97778700435956     | 0.073074527714345   | 3.39796553871704    | 7.85551172929209    | 0.0913431596429313  | 0.0913431596429313  | 0.0913431596429313  | 3.61718912186008                       | 1.97301224828732               | 0.328835374714553  | 3.70853228150301    | 3.70853228150301    | 0.109611791571518   | 0.109611791571518   | 0.694208013286278   | 0.127880423500104   | 0.127880423500104   |

Stable4\_20PerPair

|                              |          |                                                             |                  |           |          |         |           |                   |           |
|------------------------------|----------|-------------------------------------------------------------|------------------|-----------|----------|---------|-----------|-------------------|-----------|
| 2                            | 7        | peptidyl-threonine dephosphorylation                        |                  |           |          |         |           |                   |           |
| GO:0045359                   |          | 0.00657176753387678                                         | 21.6519083969466 |           |          |         |           | 0.127880423500104 |           |
| 2                            | 7        | positive regulation of interferon-beta biosynthetic process |                  |           |          |         |           |                   |           |
| GO:0002263                   |          | 0.00739237613492882                                         | 3.30393801153898 |           |          |         |           | 2.24704172721611  |           |
| 7                            | 123      | cell activation involved in immune response                 |                  |           |          |         |           |                   |           |
| GO:0002366                   |          | 0.00739237613492882                                         | 3.30393801153898 |           |          |         |           | 2.24704172721611  |           |
| 7                            | 123      | leukocyte activation involved in immune response            |                  |           |          |         |           |                   |           |
| GO:0000012                   |          | 0.00865722004551591                                         | 18.0419847328244 |           |          |         |           | 0.14614905542869  |           |
| 2                            | 8        | single strand break repair                                  |                  |           |          |         |           |                   |           |
| GO:0045350                   |          | 0.00865722004551591                                         | 18.0419847328244 |           |          |         |           | 0.14614905542869  |           |
| 2                            | 8        | interferon-beta biosynthetic process                        |                  |           |          |         |           |                   |           |
| GO:0045357                   |          | 0.00865722004551591                                         | 18.0419847328244 |           |          |         |           | 0.14614905542869  |           |
| 2                            | 8        | regulation of interferon-beta biosynthetic process          |                  |           |          |         |           |                   |           |
| GO:0045416                   |          | 0.00865722004551591                                         | 18.0419847328244 |           |          |         |           | 0.14614905542869  |           |
| 2                            | 8        | positive regulation of interleukin-8 biosynthetic process   |                  |           |          |         |           |                   |           |
| GO:0031400                   |          | 0.00926095629157091                                         | 2.29811507936508 |           |          |         |           | 5.48058957857588  |           |
| 12                           | 300      | negative regulation of protein modification process         |                  |           |          |         |           |                   |           |
| GO:0002275                   |          | 0.00973668034681133                                         | 5.18131868131868 |           |          |         |           | 0.840357068714968 |           |
| 4                            | 46       | myeloid cell activation involved in immune response         |                  |           |          |         |           |                   |           |
| Tissue: whole_Blood=>Thyroid |          |                                                             |                  |           |          |         |           |                   |           |
| SourceGene:                  |          | 7SK(ENSG00000223039.1)                                      |                  |           |          |         |           |                   |           |
| TargetGeneSet:               |          | RP11                                                        | ERRFI1           | NMNAT1    | DFFA     | DNAJC16 | OTUD3     | XKR8              | MED18     |
| PRDX3P2                      | FAM167B  | HDAC1                                                       | ZMYM1            | RNF220    | HHLA3    | DDAH1   | FRRS1     | CYB561D1          |           |
| DDX20                        | BCL9     | GJA5                                                        | BOLA1            | GOLPH3L   | ARNT     | VPS72   | SHE       | LAMTOR2           | MNDA      |
| SLAMF8                       | USP21    | FCGR3A                                                      | RNASEL           | SMG7      | TRMT1L   | ZNF281  | DISP1     | MIXL1             | C2orf44   |
| EHD3                         | ARHGEF33 |                                                             | MSH6             | PAPOLG    | SPR      | MRPL35  | ZNF2      | C2orf29           | POLR1B    |
| ICA1L                        | PARD3B   | IDH1                                                        | SPAG16           | TMEM169   | TNP1     | MRPL44  | EIF4E2    | RNPEPL1           | RPUSD3    |
| CCRL1                        | ZNF619   | ZNF620                                                      | CCR2             | DUSP7     | SCT      | ABHD10  | WDR52     | ADPRH             | MSL2      |
| SLC25A36                     |          | ZBTB38                                                      | TRPC1            | SIAH2     | P2RY13   | TACC3   | SH3BP2    | TMEM128           | ZNF518B   |
| NFXL1                        | UTP3     | IL8                                                         | CASP6            | ANKRD50   | TIGD4    | CCDC127 | LPCAT1    | BRIP1             | DAP       |
| C5orf51                      | SLC38A9  | TRIM23                                                      | CD180            | CETN3     | SLC22A5  | AFF4    | SH3RF2    | TCERG1            | HMGXB3    |
| C5orf54                      | NEURL1B  | DOK3                                                        | CTB              | HIST1H3E  |          | ZKSCAN4 | ZKSCAN3   | SCAND3            | MICB      |
| PFDN6                        | ZBTB9    | NFYA                                                        | TAF8             | C6orf203  |          | TSPYL4  | AKAP12    | FAM103A2P         | APOM      |
| ELFN1                        | RNF216P1 |                                                             | COL28A1          | TRA2A     | VOPP1    | LAT2    | TMEM60    | SLC12A9           | GCC1      |
| TNPO3                        | FAM131B  | EPHA1                                                       | ZNF786           | ZNF398    | GIMAP8   | GIMAP7  | GIMAP4    | ESYT2             | CTA       |
| SH2D4A                       | CTD      | INTS9                                                       | PDP1             | WDR67     | KLHL38   | ZNF623  | TONSL     | ZNF250            | RANBP6    |
| KLHL9                        | DCAF10   | C9orf85                                                     | C9orf40          | RMI1      | FOXE1    | RNF20   | C9orf80   | ATP6V1G1          |           |
| TRIM32                       | PSMD5    | LHX6                                                        | ZBTB34           | NAIF1     | ABL1     | GTF3C4  | QSOX2     | NUDT5             | C10orf128 |
| ERCC6                        | ADO      | MSS51                                                       | AP3M1            | ARHGAP19  |          | HIF1AN  | C10orf95  |                   | SUFU      |
| DUSP5                        | SMC3     | CASC2                                                       | DUSP8            | TPH1      | SLC35C1  | FAM180B | HEXIM1    | TMEM132A          |           |
| TTC9C                        | ZBTB3    | MEN1                                                        | EIF1AD           | C11orf82  |          | ANKRD42 | PICALM    | RDX               | DPAGT1    |
| ZNF202                       | HYLS1    | KCNJ1                                                       | RAD52            | NCAPD2    | BCDIN3D  | SMUG1   | ZC3H10    | ZBTB39            | DYRK2     |
| ATXN7L3B                     |          | CSRP2                                                       | TMPO             | RFC5      | SRRM4    | RNF34   | ORAI1     | RNF6              | FAM48A    |
| KBTBD6                       | KBTBD7   | ARL11                                                       | SUGT1            | FARP1-IT1 |          | LIG4    | RNASE2    | ACIN1             | C14orf119 |
| SYNJ2BP                      | MAP3K9   | PROX2                                                       | VASH1            | ZC3H14    | RPS6KA5  | BTBD7   | PGBD4     | ZFYVE19           | ZFP106    |
| ZSCAN29                      | HDC      | RNF111                                                      | LACTB            | DIS3L     | ANP32A   | PEX11A  | C15orf38  |                   | NR2F2     |
| LRRC28                       | ASB7     | ZNF434                                                      | TFAP4            | C16orf88  |          | SPN     | TAOK2     | DDX19B            | PLCG2     |
| SLC16A13                     |          | TNK1                                                        | SNORA48          | KRBA2     | PIGL     | BLMH    | RNF135    | CCT6B             | PEX12     |
| FAM134C                      | GJC1     | HIGD1B                                                      | TBKBP1           | DLX3      | PPP1R9B  | CHAD    | HEATR6    | APPBP2            | FTSJ3     |
| CD79B                        | QRICH2   | CBX2                                                        | LIPG             | ZNF555    | PIAS4    | TNFSF9  | ZNF557    | ZNF799            | ZNF443    |
| ZNF490                       | LYL1     | JUND                                                        | LRRC25           | SUGP1     | ZNF90    | ZNF486  | KCTD15    | ZNF792            | U2AF1L4   |
| LIN37                        | CAPNS1   | ZFP82                                                       | ZNF260           | ZNF420    | ZFP36    | EID2    | LTBP4     | MIA               | ZNF526    |
| ZNF284                       | ZNF225   | BLOC1S3                                                     | RSPH6A           | IGFL4     | PPP1R15A |         | NAPSA     | ZNF616            | ZNF816    |
| ZNF677                       | ZNF765   | ZNF835                                                      | ZNF264           | ZNF547    | ZNF17    | ZNF549  | ZNF550    | FAM110A           | ABHD12    |
| DNMT3B                       | PXMP4    | LBP                                                         | ZSWIM3           | ZSWIM1    | ZFP64    | CSTF1   | C20orf151 |                   | TCFL5     |
| SOX18                        | RCAN1    | C2CD2                                                       | C22orf29         |           | CRKL     | PPM1F   | ZNF70     | PRR14L            | MFNG      |
| TLR8                         | SCML1    | EIF1AX                                                      | ZFX              | RBM3      | FAM123B  | VSIG4   | FHL1      | IDS               | TLR7      |
| GOBPID                       | Pvalue   | OddsRatio                                                   | ExpCount         |           |          | Count   | Size      | Term              |           |
| GO:0006469                   |          | 0.000279990173208074                                        | 4.19201861130995 |           |          |         |           | 2.59414573385925  |           |
| 10                           | 142      | negative regulation of protein kinase activity              |                  |           |          |         |           |                   |           |
| GO:0010332                   |          | 0.000353325705541072                                        | 9.4248435627746  |           |          |         |           | 0.621133485571933 | 5         |
| 34                           |          | response to gamma radiation                                 |                  |           |          |         |           |                   |           |
| GO:0033673                   |          | 0.000457566102139861                                        | 3.92192997151952 |           |          |         |           | 2.75856342121652  |           |

Stable4\_20PerPair

|                              |                         |                                                                              |                  |                  |        |       |         |                    |      |
|------------------------------|-------------------------|------------------------------------------------------------------------------|------------------|------------------|--------|-------|---------|--------------------|------|
| 10                           | 151                     | negative regulation of kinase activity                                       |                  |                  |        |       |         |                    |      |
| GO:0033233                   |                         | 0.000466732731923299                                                         | 27.1666666666667 |                  |        |       |         | 0.164417687357276  |      |
| 3                            | 9                       | regulation of protein sumoylation                                            |                  |                  |        |       |         |                    |      |
| GO:0071901                   |                         | 0.000742358201208229                                                         | 5.12498054474708 |                  |        |       |         | 1.49802781814407   |      |
| 7                            | 82                      | negative regulation of protein serine/threonine kinase activity              |                  |                  |        |       |         |                    |      |
| GO:0051348                   |                         | 0.000831268473669817                                                         | 3.61123977149915 |                  |        |       |         | 2.97778700435956   |      |
| 10                           | 163                     | negative regulation of transferase activity                                  |                  |                  |        |       |         |                    |      |
| GO:0045356                   |                         | 0.00194710386073015                                                          | 54.1412213740458 |                  |        |       |         | 0.073074527714345  |      |
| 2                            | 4                       | positive regulation of interferon-alpha biosynthetic process                 |                  |                  |        |       |         |                    |      |
| GO:0001933                   |                         | 0.00223963189042068                                                          | 3.13417143879742 |                  |        |       |         | 3.39796553871704   |      |
| 10                           | 186                     | negative regulation of protein phosphorylation                               |                  |                  |        |       |         |                    |      |
| GO:0000122                   |                         | 0.00240816445650831                                                          | 2.29541912146729 |                  |        |       |         | 7.85551172929209   |      |
| 17                           | 430                     | negative regulation of transcription from RNA polymerase II promoter         |                  |                  |        |       |         |                    |      |
| GO:0002282                   |                         | 0.00320605995974029                                                          | 36.0916030534351 |                  |        |       |         | 0.0913431596429313 |      |
| 2                            | 5                       | microglial cell activation involved in immune response                       |                  |                  |        |       |         |                    |      |
| GO:0045349                   |                         | 0.00320605995974029                                                          | 36.0916030534351 |                  |        |       |         | 0.0913431596429313 |      |
| 2                            | 5                       | interferon-alpha biosynthetic process                                        |                  |                  |        |       |         |                    |      |
| GO:0045354                   |                         | 0.00320605995974029                                                          | 36.0916030534351 |                  |        |       |         | 0.0913431596429313 |      |
| 2                            | 5                       | regulation of interferon-alpha biosynthetic process                          |                  |                  |        |       |         |                    |      |
| GO:0042326                   |                         | 0.00351530233284685                                                          | 2.9316049589546  | 3.61718912186008 |        |       |         |                    | 10   |
| 198                          |                         | negative regulation of phosphorylation                                       |                  |                  |        |       |         |                    |      |
| GO:0010212                   |                         | 0.0036502089730963                                                           | 3.7986670262357  | 1.97301224828732 |        |       |         |                    | 7    |
| 108                          |                         | response to ionizing radiation                                               |                  |                  |        |       |         |                    |      |
| GO:0045736                   |                         | 0.0040144883875776                                                           | 10.8597701149425 |                  |        |       |         | 0.328835374714553  |      |
| 3                            | 18                      | negative regulation of cyclin-dependent protein kinase activity              |                  |                  |        |       |         |                    |      |
| GO:0010563                   |                         | 0.00419302704988163                                                          | 2.85463669372935 |                  |        |       |         | 3.70853228150301   |      |
| 10                           | 203                     | negative regulation of phosphorus metabolic process                          |                  |                  |        |       |         |                    |      |
| GO:0045936                   |                         | 0.00419302704988163                                                          | 2.85463669372935 |                  |        |       |         | 3.70853228150301   |      |
| 10                           | 203                     | negative regulation of phosphate metabolic process                           |                  |                  |        |       |         |                    |      |
| GO:0000244                   |                         | 0.00475121374870953                                                          | 27.0667938931298 |                  |        |       |         | 0.109611791571518  |      |
| 2                            | 6                       | assembly of spliceosomal tri-snRNP                                           |                  |                  |        |       |         |                    |      |
| GO:0007256                   |                         | 0.00475121374870953                                                          | 27.0667938931298 |                  |        |       |         | 0.109611791571518  |      |
| 2                            | 6                       | activation of JNKK activity                                                  |                  |                  |        |       |         |                    |      |
| GO:0008630                   |                         | 0.00493330491000203                                                          | 6.40407239819005 |                  |        |       |         | 0.694208013286278  |      |
| 4                            | 38                      | DNA damage response, signal transduction resulting in induction of apoptosis |                  |                  |        |       |         |                    |      |
| GO:0033235                   |                         | 0.00657176753387678                                                          | 21.6519083969466 |                  |        |       |         | 0.127880423500104  |      |
| 2                            | 7                       | positive regulation of protein sumoylation                                   |                  |                  |        |       |         |                    |      |
| GO:0035970                   |                         | 0.00657176753387678                                                          | 21.6519083969466 |                  |        |       |         | 0.127880423500104  |      |
| 2                            | 7                       | peptidyl-threonine dephosphorylation                                         |                  |                  |        |       |         |                    |      |
| GO:0045359                   |                         | 0.00657176753387678                                                          | 21.6519083969466 |                  |        |       |         | 0.127880423500104  |      |
| 2                            | 7                       | positive regulation of interferon-beta biosynthetic process                  |                  |                  |        |       |         |                    |      |
| GO:0002263                   |                         | 0.00739237613492882                                                          | 3.30393801153898 |                  |        |       |         | 2.24704172721611   |      |
| 7                            | 123                     | cell activation involved in immune response                                  |                  |                  |        |       |         |                    |      |
| GO:0002366                   |                         | 0.00739237613492882                                                          | 3.30393801153898 |                  |        |       |         | 2.24704172721611   |      |
| 7                            | 123                     | leukocyte activation involved in immune response                             |                  |                  |        |       |         |                    |      |
| GO:0000012                   |                         | 0.00865722004551591                                                          | 18.0419847328244 |                  |        |       |         | 0.14614905542869   |      |
| 2                            | 8                       | single strand break repair                                                   |                  |                  |        |       |         |                    |      |
| GO:0045350                   |                         | 0.00865722004551591                                                          | 18.0419847328244 |                  |        |       |         | 0.14614905542869   |      |
| 2                            | 8                       | interferon-beta biosynthetic process                                         |                  |                  |        |       |         |                    |      |
| GO:0045357                   |                         | 0.00865722004551591                                                          | 18.0419847328244 |                  |        |       |         | 0.14614905542869   |      |
| 2                            | 8                       | regulation of interferon-beta biosynthetic process                           |                  |                  |        |       |         |                    |      |
| GO:0045416                   |                         | 0.00865722004551591                                                          | 18.0419847328244 |                  |        |       |         | 0.14614905542869   |      |
| 2                            | 8                       | positive regulation of interleukin-8 biosynthetic process                    |                  |                  |        |       |         |                    |      |
| GO:0031400                   |                         | 0.00926095629157091                                                          | 2.29811507936508 |                  |        |       |         | 5.48058957857588   |      |
| 12                           | 300                     | negative regulation of protein modification process                          |                  |                  |        |       |         |                    |      |
| GO:0002275                   |                         | 0.00973668034681133                                                          | 5.18131868131868 |                  |        |       |         | 0.840357068714968  |      |
| 4                            | 46                      | myeloid cell activation involved in immune response                          |                  |                  |        |       |         |                    |      |
| Tissue: whole_Blood=>Thyroid |                         | Type: asymmetric                                                             |                  |                  |        |       |         |                    |      |
| SourceGene:                  | AMFR(ENSG00000159461.9) |                                                                              |                  |                  |        |       |         |                    |      |
| TargetGeneSet:               | AKR7A2                  | C1QA                                                                         | C1QC             | C1QB             | LAPTM5 | AK2   | ADORA3  | RPRD2              | RP11 |
| SLAMF1                       | RRM2                    | CAPN14                                                                       | PLEK             | ZNF638-IT1       | UBTFL6 | WDR75 | C3orf38 | C3orf26            |      |
| ILDR1                        | CD86                    | TFDP2                                                                        | GP5              | TADA2B           | CTD    | CD180 | SERINC5 | STARD4             | APC  |



Stable4\_20PerPair

| GOBPID     | Pvalue | OddsRatio | ExpCount             | Count            | Size              | Term              |
|------------|--------|-----------|----------------------|------------------|-------------------|-------------------|
| GO:0046649 | 13     | 433       | 5.72667249465935e-07 | 6.54314574314574 |                   | 2.36710262265587  |
| GO:0042110 | 11     | 319       | 1.21150996426741e-06 | 7.38655462184874 |                   | 1.74389315618296  |
| GO:0046635 | 5      | 43        | 3.51422065811752e-06 | 25.4871977240398 |                   | 0.235070237353816 |
| GO:0046634 | 5      | 55        | 1.20664215297118e-05 | 19.3540540540541 |                   | 0.300671233824649 |
| GO:0050865 | 10     | 343       | 1.67618630246928e-05 | 6.11002306654481 |                   | 1.87509514912463  |
| GO:0042129 | 6      | 101       | 1.84692614533867e-05 | 12.3521268925739 |                   | 0.552141720296173 |
| GO:0050863 | 221    |           | 2.70602554461943e-05 | 7.49004827084573 |                   | 1.2081516850045 8 |
| GO:0042102 | 5      | 66        | 2.95788295713274e-05 | 15.8517944173682 |                   | 0.360805480589579 |
| GO:0002521 | 9      | 302       | 3.85262040908757e-05 | 6.17801072647489 |                   | 1.65095841118262  |
| GO:0050870 | 7      | 171       | 4.06885179853054e-05 | 8.42276422764228 |                   | 0.934814199709363 |
| GO:0042098 | 6      | 118       | 4.46166255895924e-05 | 10.4647749510763 |                   | 0.645076465296519 |
| GO:0002252 | 10     | 386       | 4.58983233867896e-05 | 5.39469626888683 |                   | 2.11016538647844  |
| GO:0050867 | 8      | 240       | 4.86618942058087e-05 | 6.86741136474016 |                   | 1.31201992941665  |
| GO:0006959 | 6      | 122       | 5.3792325400273e-05  | 10.1010864430798 |                   | 0.66694346412013  |
| GO:0002460 | 181    |           | 5.83890837826231e-05 | 7.9331098339719  | 0.98948169676839  | 7                 |
| GO:0007596 | 498    |           | 7.9140657730722e-05  | 4.6121210291098  | 2.72244135353955  | 11                |
| GO:0046631 | 82     |           | 8.43596319850862e-05 | 12.543875043875  | 0.448273475884022 | 5                 |
| GO:0072376 | 82     |           | 8.43596319850862e-05 | 12.543875043875  | 0.448273475884022 | 5                 |
| GO:0032623 | 4      | 44        | 9.51104621521364e-05 | 19.1093333333333 |                   | 0.240536987059719 |
| GO:0043372 | 3      | 17        | 0.000101184972910591 | 40.4830827067669 |                   | 0.092934745000346 |
| GO:0002250 | 7      | 198       | 0.000102678435140264 | 7.21836823734729 |                   | 1.08241644176874  |
| GO:0050670 | 6      | 144       | 0.000134847218798117 | 8.47766527695057 |                   | 0.78721195764999  |
| GO:0032944 | 6      | 145       | 0.000140061736785277 | 8.41608357149897 |                   | 0.792678707355892 |
| GO:2000516 | 3      | 19        | 0.000143056593367425 | 35.4177631578947 |                   | 0.103868244412151 |
| GO:0002443 | 7      | 211       | 0.000152438472788205 | 6.75217864923747 |                   | 1.15348418794547  |
| GO:0051249 |        |           | 0.000153408109780161 | 5.7759795134443  | 1.54709016677047  | 8                 |

Stable4\_20PerPair

|            |                                                                  |                  |                    |  |   |
|------------|------------------------------------------------------------------|------------------|--------------------|--|---|
| 283        | regulation of lymphocyte activation                              |                  |                    |  |   |
| GO:0050778 | 0.000160843711861014                                             | 5.07657947686117 | 1.98989689294858   |  |   |
| 9          | 364 positive regulation of immune response                       |                  |                    |  |   |
| GO:0070663 | 0.000168584536111386                                             | 8.12100456621005 | 0.820012455885406  |  |   |
| 6          | 150 regulation of leukocyte proliferation                        |                  |                    |  |   |
| GO:0051251 | 0.00017117417106622                                              | 6.6204594017094  | 1.17535118676908   |  | 7 |
| 215        | positive regulation of lymphocyte activation                     |                  |                    |  |   |
| GO:0050671 | 0.000178056376220367                                             | 10.6036531036531 | 0.52480797176666   |  |   |
| 5          | 96 positive regulation of lymphocyte proliferation               |                  |                    |  |   |
| GO:0030168 | 0.000181218179527848                                             | 6.55648148148148 | 1.18628468618089   |  |   |
| 7          | 217 platelet activation                                          |                  |                    |  |   |
| GO:0032946 | 0.000186937031774168                                             | 10.4876615746181 | 0.530274721472562  |  |   |
| 5          | 97 positive regulation of mononuclear cell proliferation         |                  |                    |  |   |
| GO:0045582 | 0.000197657353137294                                             | 15.5896598639456 | 0.289737734412843  |  |   |
| 4          | 53 positive regulation of T cell differentiation                 |                  |                    |  |   |
| GO:0006954 | 0.000202253503132725                                             | 4.46325509811466 | 2.52563836412705   |  |   |
| 10         | 462 inflammatory response                                        |                  |                    |  |   |
| GO:0030097 | 0.000205812297407556                                             | 4.45308250951787 | 2.53110511383295   |  |   |
| 10         | 463 hemopoiesis                                                  |                  |                    |  |   |
| GO:0070665 | 0.000215617880731047                                             | 10.1543385490754 | 0.546674970590271  |  |   |
| 5          | 100 positive regulation of leukocyte proliferation               |                  |                    |  |   |
| GO:0002253 | 0.000223274281062664                                             | 5.45220463675524 | 1.63455816206491   |  |   |
| 8          | 299 activation of immune response                                |                  |                    |  |   |
| GO:0002696 | 0.000279994646039632                                             | 6.08542281219272 | 1.27375268147533   |  |   |
| 7          | 233 positive regulation of leukocyte activation                  |                  |                    |  |   |
| GO:0048534 | 0.000351097338747098                                             | 4.14970865082922 | 2.70604110442184   |  |   |
| 10         | 495 hemopoietic or lymphoid organ development                    |                  |                    |  |   |
| GO:0046651 | 0.000353095449693844                                             | 7.03383396600099 | 0.940280949415265  |  |   |
| 6          | 172 lymphocyte proliferation                                     |                  |                    |  |   |
| GO:0002694 | 0.000360174358177522                                             | 5.0610628627998  | 1.75482665559477   |  | 8 |
| 321        | regulation of leukocyte activation                               |                  |                    |  |   |
| GO:0045621 | 0.000362790922793897                                             | 13.1622988505747 | 0.338938481765968  |  |   |
| 4          | 62 positive regulation of lymphocyte differentiation             |                  |                    |  |   |
| GO:0032943 | 0.000375591082620152                                             | 6.94911937377691 | 0.951214448827071  |  |   |
| 6          | 174 mononuclear cell proliferation                               |                  |                    |  |   |
| GO:0006956 | 0.000385789434511847                                             | 12.9383050847458 | 0.34440523147187   |  |   |
| 4          | 63 complement activation                                         |                  |                    |  |   |
| GO:0043370 | 0.00041843949134889                                              | 23.5986842105263 | 0.147602242059373  |  |   |
| 3          | 27 regulation of CD4-positive, alpha-beta T cell differentiation |                  |                    |  |   |
| GO:0070661 | 0.000477030694398031                                             | 6.62951432129514 | 0.994948446474292  |  |   |
| 6          | 182 leukocyte proliferation                                      |                  |                    |  |   |
| GO:0007229 | 0.000516664230974918                                             | 11.9233333333333 | 0.371738980001384  |  |   |
| 4          | 68 integrin-mediated signaling pathway                           |                  |                    |  |   |
| GO:2000514 | 0.000518632478943084                                             | 21.7803643724696 | 0.158535741471178  |  |   |
| 3          | 29 regulation of CD4-positive, alpha-beta T cell activation      |                  |                    |  |   |
| GO:0046638 | 0.000573997426413046                                             | 20.9722222222222 | 0.164002491177081  |  |   |
| 3          | 30 positive regulation of alpha-beta T cell differentiation      |                  |                    |  |   |
| GO:0032515 | 0.000608769608858003                                             | 74.6337662337662 | 0.0382672479413189 |  |   |
| 2          | 7 negative regulation of phosphoprotein phosphatase activity     |                  |                    |  |   |
| GO:0032101 | 0.000739919289285456                                             | 4.51412474849095 | 1.95709639471317   |  |   |
| 8          | 358 regulation of response to external stimulus                  |                  |                    |  |   |
| GO:0001817 | 0.00075347948560816                                              | 4.50094297981622 | 1.96256314441907   |  |   |
| 8          | 359 regulation of cytokine production                            |                  |                    |  |   |
| GO:0030098 | 0.000868287961127102                                             | 5.88376919883769 | 1.11521694000415   |  |   |
| 6          | 204 lymphocyte differentiation                                   |                  |                    |  |   |
| GO:0045580 | 0.00104736885590511                                              | 9.77367521367521 | 0.448273475884022  |  |   |
| 4          | 82 regulation of T cell differentiation                          |                  |                    |  |   |
| GO:0032663 | 0.00124719428053958                                              | 15.719298245614  | 0.213203238530206  |  | 3 |
| 39         | regulation of interleukin-2 production                           |                  |                    |  |   |
| GO:0046637 | 0.00134303976147446                                              | 15.2933854907539 | 0.218669988236108  |  |   |
| 3          | 40 regulation of alpha-beta T cell differentiation               |                  |                    |  |   |
| GO:0001816 | 0.00139261489937974                                              | 4.07176911598792 | 2.15936613383157   |  |   |
| 8          | 395 cytokine production                                          |                  |                    |  |   |

Stable4\_20PerPair

|            |                     |                                                                |                    |
|------------|---------------------|----------------------------------------------------------------|--------------------|
| GO:0043367 | 0.00144339767295301 | 14.8898891966759                                               | 0.224136737942011  |
| 3          | 41                  | CD4-positive, alpha-beta T cell differentiation                |                    |
| GO:0030217 | 0.0016299378764811  | 6.36343296939323                                               | 0.852812954120822  |
| 5          | 156                 | T cell differentiation                                         |                    |
| GO:0006801 | 0.00165795990725779 | 14.1434210526316                                               | 0.235070237353816  |
| 3          | 43                  | superoxide metabolic process                                   |                    |
| GO:0035710 | 0.00165795990725779 | 14.1434210526316                                               | 0.235070237353816  |
| 3          | 43                  | CD4-positive, alpha-beta T cell activation                     |                    |
| GO:0045619 | 0.00210180443756686 | 8.01515789473684                                               | 0.541208220884368  |
| 4          | 99                  | regulation of lymphocyte differentiation                       |                    |
| GO:0002449 | 0.00219684706663474 | 5.92676009342676                                               | 0.912947200885752  |
| 5          | 167                 | lymphocyte mediated immunity                                   |                    |
| GO:0006958 | 0.0025619684878847  | 12.0310750279955                                               | 0.273337485295135  |
| 3          | 50                  | complement activation, classical pathway                       |                    |
| GO:0006085 | 0.00257329522717421 | 31.0822510822511                                               | 0.0765344958826379 |
| 2          | 14                  | acetyl-CoA biosynthetic process                                |                    |
| GO:0046641 | 0.00257329522717421 | 31.0822510822511                                               | 0.0765344958826379 |
| 2          | 14                  | positive regulation of alpha-beta T cell proliferation         |                    |
| GO:0030316 | 0.00286623451783341 | 11.5383995703545                                               | 0.284270984706941  |
| 3          | 52                  | osteoclast differentiation                                     |                    |
| GO:0016064 | 0.00318303113197412 | 7.11028037383178                                               | 0.6068092173552    |
| 111        |                     | immunoglobulin mediated immune response                        | 4                  |
| GO:0019724 | 0.00350309245351609 | 6.91490909090909                                               | 0.623209466472908  |
| 4          | 114                 | B cell mediated immunity                                       |                    |
| GO:0030866 | 0.0038051697756915  | 24.8606060606061                                               | 0.092934745000346  |
| 2          | 17                  | cortical actin cytoskeleton organization                       |                    |
| GO:0042095 | 0.0038051697756915  | 24.8606060606061                                               | 0.092934745000346  |
| 2          | 17                  | interferon-gamma biosynthetic process                          |                    |
| GO:0045637 | 0.00396300212636255 | 6.67040935672515                                               | 0.645076465296519  |
| 4          | 118                 | regulation of myeloid cell differentiation                     |                    |
| GO:0015949 | 0.0042656979540683  | 23.3051948051948                                               | 0.0984014947062487 |
| 2          | 18                  | nucleobase-containing small molecule interconversion           |                    |
| GO:0032620 | 0.0042656979540683  | 23.3051948051948                                               | 0.0984014947062487 |
| 2          | 18                  | interleukin-17 production                                      |                    |
| GO:0032660 | 0.0042656979540683  | 23.3051948051948                                               | 0.0984014947062487 |
| 2          | 18                  | regulation of interleukin-17 production                        |                    |
| GO:0042104 | 0.0042656979540683  | 23.3051948051948                                               | 0.0984014947062487 |
| 2          | 18                  | positive regulation of activated T cell proliferation          |                    |
| GO:0046640 | 0.0042656979540683  | 23.3051948051948                                               | 0.0984014947062487 |
| 2          | 18                  | regulation of alpha-beta T cell proliferation                  |                    |
| GO:0032649 | 0.00471707493739376 | 9.57604817127565                                               | 0.338938481765968  |
| 3          | 62                  | regulation of interferon-gamma production                      |                    |
| GO:0030865 | 0.00475071458473899 | 21.9327731092437                                               | 0.103868244412151  |
| 2          | 19                  | cortical cytoskeleton organization                             |                    |
| GO:0002573 | 0.00486334739263922 | 6.28143250688705                                               | 0.683343713237838  |
| 4          | 125                 | myeloid leukocyte differentiation                              |                    |
| GO:0002455 | 0.00538456951437865 | 9.11078098471986                                               | 0.355338730883676  |
| 3          | 65                  | humoral immune response mediated by circulating immunoglobulin |                    |
| GO:0046632 | 0.00538456951437865 | 9.11078098471986                                               | 0.355338730883676  |
| 3          | 65                  | alpha-beta T cell differentiation                              |                    |
| GO:0002446 | 0.00579311705311845 | 19.6213260423787                                               | 0.114801743823957  |
| 2          | 21                  | neutrophil mediated immunity                                   |                    |
| GO:0031529 | 0.00579311705311845 | 19.6213260423787                                               | 0.114801743823957  |
| 2          | 21                  | ruffle organization                                            |                    |
| GO:0042094 | 0.00579311705311845 | 19.6213260423787                                               | 0.114801743823957  |
| 2          | 21                  | interleukin-2 biosynthetic process                             |                    |
| GO:0046633 | 0.00579311705311845 | 19.6213260423787                                               | 0.114801743823957  |
| 2          | 21                  | alpha-beta T cell proliferation                                |                    |
| GO:0032609 | 0.00585952701430043 | 8.82483552631579                                               | 0.366272230295481  |
| 3          | 67                  | interferon-gamma production                                    |                    |
| GO:0010543 | 0.00634996031081422 | 18.638961038961                                                | 0.12026849352986   |
| 22         |                     | regulation of platelet activation                              | 2                  |
| GO:0030225 | 0.00634996031081422 | 18.638961038961                                                | 0.12026849352986   |
| 2          |                     |                                                                | 2                  |

STable4\_20PerPair

|                              |                            |                                                        |                                                     |                  |         |                   |          |                   |           |      |
|------------------------------|----------------------------|--------------------------------------------------------|-----------------------------------------------------|------------------|---------|-------------------|----------|-------------------|-----------|------|
| 22                           | macrophage differentiation |                                                        |                                                     |                  |         |                   |          |                   |           |      |
| GO:0032673                   | 0.00693020683008556        | 17.7501546072975                                       |                                                     |                  |         |                   |          | 0.125735243235762 |           |      |
| 2                            | 23                         | regulation of interleukin-4 production                 |                                                     |                  |         |                   |          |                   |           |      |
| GO:0042554                   | 0.00693020683008556        | 17.7501546072975                                       |                                                     |                  |         |                   |          | 0.125735243235762 |           |      |
| 2                            | 23                         | superoxide anion generation                            |                                                     |                  |         |                   |          |                   |           |      |
| GO:0043029                   | 0.00693020683008556        | 17.7501546072975                                       |                                                     |                  |         |                   |          | 0.125735243235762 |           |      |
| 2                            | 23                         | T cell homeostasis                                     |                                                     |                  |         |                   |          |                   |           |      |
| GO:0002761                   | 0.00743179406559731        | 8.06503759398496                                       |                                                     |                  |         |                   |          | 0.399072728530898 |           |      |
| 3                            | 73                         | regulation of myeloid leukocyte differentiation        |                                                     |                  |         |                   |          |                   |           |      |
| GO:0071706                   | 0.00743179406559731        | 8.06503759398496                                       |                                                     |                  |         |                   |          | 0.399072728530898 |           |      |
| 3                            | 73                         | tumor necrosis factor superfamily cytokine production  |                                                     |                  |         |                   |          |                   |           |      |
| GO:0046006                   | 0.00753359074695003        | 16.9421487603306                                       |                                                     |                  |         |                   |          | 0.131201992941665 |           |      |
| 2                            | 24                         | regulation of activated T cell proliferation           |                                                     |                  |         |                   |          |                   |           |      |
| GO:0030099                   | 0.00804466067507511        | 4.30667153640127                                       |                                                     |                  |         |                   |          | 1.24095218323991  |           |      |
| 5                            | 227                        | myeloid cell differentiation                           |                                                     |                  |         |                   |          |                   |           |      |
| GO:0030858                   | 0.00815984834055658        | 16.2044042913608                                       |                                                     |                  |         |                   |          | 0.136668742647568 |           |      |
| 2                            | 25                         | positive regulation of epithelial cell differentiation |                                                     |                  |         |                   |          |                   |           |      |
| GO:0032855                   | 0.00815984834055658        | 16.2044042913608                                       |                                                     |                  |         |                   |          | 0.136668742647568 |           |      |
| 2                            | 25                         | positive regulation of Rac GTPase activity             |                                                     |                  |         |                   |          |                   |           |      |
| GO:0042092                   | 0.00815984834055658        | 16.2044042913608                                       |                                                     |                  |         |                   |          | 0.136668742647568 |           |      |
| 2                            | 25                         | type 2 immune response                                 |                                                     |                  |         |                   |          |                   |           |      |
| GO:0043666                   | 0.00815984834055658        | 16.2044042913608                                       |                                                     |                  |         |                   |          | 0.136668742647568 |           |      |
| 2                            | 25                         | regulation of phosphoprotein phosphatase activity      |                                                     |                  |         |                   |          |                   |           |      |
| GO:0050798                   | 0.00880871801818296        | 15.5281385281385                                       |                                                     |                  |         |                   |          | 0.14213549235347  |           |      |
| 2                            | 26                         | activated T cell proliferation                         |                                                     |                  |         |                   |          |                   |           |      |
| GO:0051004                   | 0.00880871801818296        | 15.5281385281385                                       |                                                     |                  |         |                   |          | 0.14213549235347  |           |      |
| 2                            | 26                         | regulation of lipoprotein lipase activity              |                                                     |                  |         |                   |          |                   |           |      |
| GO:0032633                   | 0.00947994030032968        | 14.905974025974                                        | 0.147602242059373                                   |                  |         |                   |          |                   | 2         |      |
| 27                           |                            | interleukin-4 production                               |                                                     |                  |         |                   |          |                   |           |      |
| GO:0032722                   | 0.00947994030032968        | 14.905974025974                                        | 0.147602242059373                                   |                  |         |                   |          |                   | 2         |      |
| 27                           |                            | positive regulation of chemokine production            |                                                     |                  |         |                   |          |                   |           |      |
| GO:0042113                   | 0.00982247367293868        | 5.0910067114094                                        | 0.836412705003114                                   |                  |         |                   |          |                   | 4         |      |
| 153                          |                            | B cell activation                                      |                                                     |                  |         |                   |          |                   |           |      |
| Tissue: whole_blood=>Thyroid |                            | Type:                                                  | cluster                                             |                  |         |                   |          |                   |           |      |
| SourceGene:                  |                            | AMFR(ENSG00000159461.9)                                |                                                     |                  |         |                   |          |                   |           |      |
| TargetGeneSet:               |                            | AKR7A2                                                 | C1QA                                                | C1QC             | C1QB    | LAPTM5            | AK2      | ADORA3            | RPRD2     | RP11 |
| SLAMF1                       | RRM2                       | CAPN14                                                 | PLEK                                                | ZNF638-IT1       | UBTFL6  | WDR75             | ADORA3   | C3orf38           | C3orf26   |      |
| ILDR1                        | CD86                       | TFDP2                                                  | GP5                                                 | TADA2B           | CTD     | CD180             | SERINC5  | STARD4            | APC       |      |
| CSF1R                        | HAVCR2                     | C5orf58                                                | F13A1                                               | C6orf47          | ZBTB22  | TBCC              | SGK1     | SRP72P2           | CCZ1      |      |
| NCF1B                        | TFEC                       | GCC1                                                   | TBXAS1                                              | ZNF767           | INSIG1  | NAIF1             | SETP5    | IL2RA             | HSD17B7P2 |      |
| CEP55                        | O3FAR1                     | RHOG                                                   | MTRNR2L8                                            |                  | FAM111B | MS4A6A            | MS4A4E   | MS4A7             | YIF1A     |      |
| FOLR2                        | CWF19L2                    | IL18                                                   | MCAM                                                | CD163            | ARID2   | NCKAP1L           | C12orf56 |                   | KRT8P22   |      |
| SELPLG                       | HVCN1                      | EXOSC8                                                 | RNASE6                                              | ALDH6A1          | PSTPIP1 | C15orf58          | IGSF6    |                   | APOBR     |      |
| ITGAM                        | SHCBP1                     | AMFR                                                   | MT3                                                 | CTB              | MLYCD   | PIK3R5            | CDK5RAP3 |                   | PKD2      |      |
| GNA15                        | EBI3                       | VAV1                                                   | MYO1F                                               | LRRC25           | POU2F2  | CD33              | LILRA2   | ZNF8              | FKBP1A    |      |
| CRLS1                        | 7SK                        | NCOA3                                                  | ITGB2                                               | TOB2             | GPR34   | RP6               | WAS      | ACTG1P10          |           | ZXDB |
| VSIG4                        | RPSAP14                    | XIAP                                                   | SASH3                                               |                  |         |                   |          |                   |           |      |
| GOBPID                       | Pvalue                     | OddsRatio                                              | ExpCount                                            | Count            | Size    | Term              |          |                   |           |      |
| GO:0046649                   | 13                         | 433                                                    | 5.72667249465935e-07                                | 6.54314574314574 |         | 2.36710262265587  |          |                   |           |      |
|                              |                            |                                                        | lymphocyte activation                               |                  |         |                   |          |                   |           |      |
| GO:0042110                   | 11                         | 319                                                    | 1.21150996426741e-06                                | 7.38655462184874 |         | 1.74389315618296  |          |                   |           |      |
|                              |                            |                                                        | T cell activation                                   |                  |         |                   |          |                   |           |      |
| GO:0046635                   | 5                          | 43                                                     | 3.51422065811752e-06                                | 25.4871977240398 |         | 0.235070237353816 |          |                   |           |      |
|                              |                            |                                                        | positive regulation of alpha-beta T cell activation |                  |         |                   |          |                   |           |      |
| GO:0046634                   | 5                          | 55                                                     | 1.20664215297118e-05                                | 19.3540540540541 |         | 0.300671233824649 |          |                   |           |      |
|                              |                            |                                                        | regulation of alpha-beta T cell activation          |                  |         |                   |          |                   |           |      |
| GO:0050865                   | 10                         | 343                                                    | 1.67618630246928e-05                                | 6.11002306654481 |         | 1.87509514912463  |          |                   |           |      |
|                              |                            |                                                        | regulation of cell activation                       |                  |         |                   |          |                   |           |      |
| GO:0042129                   | 6                          | 101                                                    | 1.84692614533867e-05                                | 12.3521268925739 |         | 0.552141720296173 |          |                   |           |      |
|                              |                            |                                                        | regulation of T cell proliferation                  |                  |         |                   |          |                   |           |      |
| GO:0050863                   | 221                        |                                                        | 2.70602554461943e-05                                | 7.49004827084573 |         | 1.2081516850045   |          |                   |           | 8    |
|                              |                            |                                                        | regulation of T cell activation                     |                  |         |                   |          |                   |           |      |
| GO:0042102                   |                            |                                                        | 2.95788295713274e-05                                | 15.8517944173682 |         | 0.360805480589579 |          |                   |           |      |

Stable4\_20PerPair

|            |     |                                                                                                                           |                  |                   |    |
|------------|-----|---------------------------------------------------------------------------------------------------------------------------|------------------|-------------------|----|
| 5          | 66  | positive regulation of T cell proliferation                                                                               |                  |                   |    |
| GO:0002521 |     | 3.85262040908757e-05                                                                                                      | 6.17801072647489 | 1.65095841118262  |    |
| 9          | 302 | leukocyte differentiation                                                                                                 |                  |                   |    |
| GO:0050870 |     | 4.06885179853054e-05                                                                                                      | 8.42276422764228 | 0.934814199709363 |    |
| 7          | 171 | positive regulation of T cell activation                                                                                  |                  |                   |    |
| GO:0042098 |     | 4.46166255895924e-05                                                                                                      | 10.4647749510763 | 0.645076465296519 |    |
| 6          | 118 | T cell proliferation                                                                                                      |                  |                   |    |
| GO:0002252 |     | 4.58983233867896e-05                                                                                                      | 5.39469626888683 | 2.11016538647844  |    |
| 10         | 386 | immune effector process                                                                                                   |                  |                   |    |
| GO:0050867 |     | 4.86618942058087e-05                                                                                                      | 6.86741136474016 | 1.31201992941665  |    |
| 8          | 240 | positive regulation of cell activation                                                                                    |                  |                   |    |
| GO:0006959 |     | 5.3792325400273e-05                                                                                                       | 10.1010864430798 | 0.66694346412013  |    |
| 6          | 122 | humoral immune response                                                                                                   |                  |                   |    |
| GO:0002460 |     | 5.83890837826231e-05                                                                                                      | 7.9331098339719  | 0.98948169676839  | 7  |
| 181        |     | adaptive immune response based on somatic recombination of immune receptors built from immunoglobulin superfamily domains |                  |                   |    |
| GO:0007596 |     | 7.9140657730722e-05                                                                                                       | 4.6121210291098  | 2.72244135353955  | 11 |
| 498        |     | blood coagulation                                                                                                         |                  |                   |    |
| GO:0046631 |     | 8.43596319850862e-05                                                                                                      | 12.543875043875  | 0.448273475884022 | 5  |
| 82         |     | alpha-beta T cell activation                                                                                              |                  |                   |    |
| GO:0072376 |     | 8.43596319850862e-05                                                                                                      | 12.543875043875  | 0.448273475884022 | 5  |
| 82         |     | protein activation cascade                                                                                                |                  |                   |    |
| GO:0032623 |     | 9.51104621521364e-05                                                                                                      | 19.1093333333333 | 0.240536987059719 |    |
| 4          | 44  | interleukin-2 production                                                                                                  |                  |                   |    |
| GO:0043372 |     | 0.000101184972910591                                                                                                      | 40.4830827067669 | 0.092934745000346 |    |
| 3          | 17  | positive regulation of CD4-positive, alpha-beta T cell differentiation                                                    |                  |                   |    |
| GO:0002250 |     | 0.000102678435140264                                                                                                      | 7.21836823734729 | 1.08241644176874  |    |
| 7          | 198 | adaptive immune response                                                                                                  |                  |                   |    |
| GO:0050670 |     | 0.000134847218798117                                                                                                      | 8.47766527695057 | 0.78721195764999  |    |
| 6          | 144 | regulation of lymphocyte proliferation                                                                                    |                  |                   |    |
| GO:0032944 |     | 0.000140061736785277                                                                                                      | 8.41608357149897 | 0.792678707355892 |    |
| 6          | 145 | regulation of mononuclear cell proliferation                                                                              |                  |                   |    |
| GO:2000516 |     | 0.000143056593367425                                                                                                      | 35.4177631578947 | 0.103868244412151 |    |
| 3          | 19  | positive regulation of CD4-positive, alpha-beta T cell activation                                                         |                  |                   |    |
| GO:0002443 |     | 0.000152438472788205                                                                                                      | 6.75217864923747 | 1.15348418794547  |    |
| 7          | 211 | leukocyte mediated immunity                                                                                               |                  |                   |    |
| GO:0051249 |     | 0.000153408109780161                                                                                                      | 5.7759795134443  | 1.54709016677047  | 8  |
| 283        |     | regulation of lymphocyte activation                                                                                       |                  |                   |    |
| GO:0050778 |     | 0.000160843711861014                                                                                                      | 5.07657947686117 | 1.98989689294858  |    |
| 9          | 364 | positive regulation of immune response                                                                                    |                  |                   |    |
| GO:0070663 |     | 0.000168584536111386                                                                                                      | 8.12100456621005 | 0.820012455885406 |    |
| 6          | 150 | regulation of leukocyte proliferation                                                                                     |                  |                   |    |
| GO:0051251 |     | 0.00017117417106622                                                                                                       | 6.6204594017094  | 1.17535118676908  | 7  |
| 215        |     | positive regulation of lymphocyte activation                                                                              |                  |                   |    |
| GO:0050671 |     | 0.000178056376220367                                                                                                      | 10.6036531036531 | 0.52480797176666  |    |
| 5          | 96  | positive regulation of lymphocyte proliferation                                                                           |                  |                   |    |
| GO:0030168 |     | 0.000181218179527848                                                                                                      | 6.55648148148148 | 1.18628468618089  |    |
| 7          | 217 | platelet activation                                                                                                       |                  |                   |    |
| GO:0032946 |     | 0.000186937031774168                                                                                                      | 10.4876615746181 | 0.530274721472562 |    |
| 5          | 97  | positive regulation of mononuclear cell proliferation                                                                     |                  |                   |    |
| GO:0045582 |     | 0.000197657353137294                                                                                                      | 15.5896598639456 | 0.289737734412843 |    |
| 4          | 53  | positive regulation of T cell differentiation                                                                             |                  |                   |    |
| GO:0006954 |     | 0.000202253503132725                                                                                                      | 4.46325509811466 | 2.52563836412705  |    |
| 10         | 462 | inflammatory response                                                                                                     |                  |                   |    |
| GO:0030097 |     | 0.000205812297407556                                                                                                      | 4.45308250951787 | 2.53110511383295  |    |
| 10         | 463 | hemopoiesis                                                                                                               |                  |                   |    |
| GO:0070665 |     | 0.000215617880731047                                                                                                      | 10.1543385490754 | 0.546674970590271 |    |
| 5          | 100 | positive regulation of leukocyte proliferation                                                                            |                  |                   |    |
| GO:0002253 |     | 0.000223274281062664                                                                                                      | 5.45220463675524 | 1.63455816206491  |    |
| 8          | 299 | activation of immune response                                                                                             |                  |                   |    |
| GO:0002696 |     | 0.000279994646039632                                                                                                      | 6.08542281219272 | 1.27375268147533  |    |
| 7          | 233 | positive regulation of leukocyte activation                                                                               |                  |                   |    |

Stable4\_20PerPair

|            |                                                               |                  |                     |
|------------|---------------------------------------------------------------|------------------|---------------------|
| GO:0048534 | 0.000351097338747098                                          | 4.14970865082922 | 2.70604110442184    |
| 10 495     | hemopoietic or lymphoid organ development                     |                  |                     |
| GO:0046651 | 0.000353095449693844                                          | 7.03383396600099 | 0.940280949415265   |
| 6 172      | lymphocyte proliferation                                      |                  |                     |
| GO:0002694 | 0.000360174358177522                                          | 5.0610628627998  | 1.75482665559477 8  |
| 321        | regulation of leukocyte activation                            |                  |                     |
| GO:0045621 | 0.000362790922793897                                          | 13.1622988505747 | 0.338938481765968   |
| 4 62       | positive regulation of lymphocyte differentiation             |                  |                     |
| GO:0032943 | 0.000375591082620152                                          | 6.94911937377691 | 0.951214448827071   |
| 6 174      | mononuclear cell proliferation                                |                  |                     |
| GO:0006956 | 0.000385789434511847                                          | 12.9383050847458 | 0.34440523147187    |
| 4 63       | complement activation                                         |                  |                     |
| GO:0043370 | 0.00041843949134889                                           | 23.5986842105263 | 0.147602242059373   |
| 3 27       | regulation of CD4-positive, alpha-beta T cell differentiation |                  |                     |
| GO:0070661 | 0.000477030694398031                                          | 6.62951432129514 | 0.994948446474292   |
| 6 182      | leukocyte proliferation                                       |                  |                     |
| GO:0007229 | 0.000516664230974918                                          | 11.9233333333333 | 0.371738980001384   |
| 4 68       | integrin-mediated signaling pathway                           |                  |                     |
| GO:2000514 | 0.000518632478943084                                          | 21.7803643724696 | 0.158535741471178   |
| 3 29       | regulation of CD4-positive, alpha-beta T cell activation      |                  |                     |
| GO:0046638 | 0.000573997426413046                                          | 20.9722222222222 | 0.164002491177081   |
| 3 30       | positive regulation of alpha-beta T cell differentiation      |                  |                     |
| GO:0032515 | 0.000608769608858003                                          | 74.6337662337662 | 0.0382672479413189  |
| 2 7        | negative regulation of phosphoprotein phosphatase activity    |                  |                     |
| GO:0032101 | 0.000739919289285456                                          | 4.51412474849095 | 1.95709639471317    |
| 8 358      | regulation of response to external stimulus                   |                  |                     |
| GO:0001817 | 0.00075347948560816                                           | 4.50094297981622 | 1.96256314441907    |
| 8 359      | regulation of cytokine production                             |                  |                     |
| GO:0030098 | 0.000868287961127102                                          | 5.88376919883769 | 1.11521694000415    |
| 6 204      | lymphocyte differentiation                                    |                  |                     |
| GO:0045580 | 0.00104736885590511                                           | 9.77367521367521 | 0.448273475884022   |
| 4 82       | regulation of T cell differentiation                          |                  |                     |
| GO:0032663 | 0.00124719428053958                                           | 15.719298245614  | 0.213203238530206 3 |
| 39         | regulation of interleukin-2 production                        |                  |                     |
| GO:0046637 | 0.00134303976147446                                           | 15.2933854907539 | 0.218669988236108   |
| 3 40       | regulation of alpha-beta T cell differentiation               |                  |                     |
| GO:0001816 | 0.00139261489937974                                           | 4.07176911598792 | 2.15936613383157    |
| 8 395      | cytokine production                                           |                  |                     |
| GO:0043367 | 0.00144339767295301                                           | 14.8898891966759 | 0.224136737942011   |
| 3 41       | CD4-positive, alpha-beta T cell differentiation               |                  |                     |
| GO:0030217 | 0.0016299378764811                                            | 6.36343296939323 | 0.852812954120822   |
| 5 156      | T cell differentiation                                        |                  |                     |
| GO:0006801 | 0.00165795990725779                                           | 14.1434210526316 | 0.235070237353816   |
| 3 43       | superoxide metabolic process                                  |                  |                     |
| GO:0035710 | 0.00165795990725779                                           | 14.1434210526316 | 0.235070237353816   |
| 3 43       | CD4-positive, alpha-beta T cell activation                    |                  |                     |
| GO:0045619 | 0.00210180443756686                                           | 8.01515789473684 | 0.541208220884368   |
| 4 99       | regulation of lymphocyte differentiation                      |                  |                     |
| GO:0002449 | 0.00219684706663474                                           | 5.92676009342676 | 0.912947200885752   |
| 5 167      | lymphocyte mediated immunity                                  |                  |                     |
| GO:0006958 | 0.0025619684878847                                            | 12.0310750279955 | 0.273337485295135   |
| 3 50       | complement activation, classical pathway                      |                  |                     |
| GO:0006085 | 0.00257329522717421                                           | 31.0822510822511 | 0.0765344958826379  |
| 2 14       | acetyl-CoA biosynthetic process                               |                  |                     |
| GO:0046641 | 0.00257329522717421                                           | 31.0822510822511 | 0.0765344958826379  |
| 2 14       | positive regulation of alpha-beta T cell proliferation        |                  |                     |
| GO:0030316 | 0.00286623451783341                                           | 11.5383995703545 | 0.284270984706941   |
| 3 52       | osteoclast differentiation                                    |                  |                     |
| GO:0016064 | 0.00318303113197412                                           | 7.11028037383178 | 0.6068092173552 4   |
| 111        | immunoglobulin mediated immune response                       |                  |                     |
| GO:0019724 | 0.00350309245351609                                           | 6.91490909090909 | 0.623209466472908   |
| 4 114      | B cell mediated immunity                                      |                  |                     |
| GO:0030866 | 0.0038051697756915                                            | 24.8606060606061 | 0.092934745000346   |

STable4\_20PerPair

|            |     |                                                                |                  |                    |   |
|------------|-----|----------------------------------------------------------------|------------------|--------------------|---|
| 2          | 17  | cortical actin cytoskeleton organization                       |                  |                    |   |
| GO:0042095 |     | 0.0038051697756915                                             | 24.8606060606061 | 0.092934745000346  |   |
| 2          | 17  | interferon-gamma biosynthetic process                          |                  |                    |   |
| GO:0045637 |     | 0.00396300212636255                                            | 6.67040935672515 | 0.645076465296519  |   |
| 4          | 118 | regulation of myeloid cell differentiation                     |                  |                    |   |
| GO:0015949 |     | 0.0042656979540683                                             | 23.3051948051948 | 0.0984014947062487 |   |
| 2          | 18  | nucleobase-containing small molecule interconversion           |                  |                    |   |
| GO:0032620 |     | 0.0042656979540683                                             | 23.3051948051948 | 0.0984014947062487 |   |
| 2          | 18  | interleukin-17 production                                      |                  |                    |   |
| GO:0032660 |     | 0.0042656979540683                                             | 23.3051948051948 | 0.0984014947062487 |   |
| 2          | 18  | regulation of interleukin-17 production                        |                  |                    |   |
| GO:0042104 |     | 0.0042656979540683                                             | 23.3051948051948 | 0.0984014947062487 |   |
| 2          | 18  | positive regulation of activated T cell proliferation          |                  |                    |   |
| GO:0046640 |     | 0.0042656979540683                                             | 23.3051948051948 | 0.0984014947062487 |   |
| 2          | 18  | regulation of alpha-beta T cell proliferation                  |                  |                    |   |
| GO:0032649 |     | 0.00471707493739376                                            | 9.57604817127565 | 0.338938481765968  |   |
| 3          | 62  | regulation of interferon-gamma production                      |                  |                    |   |
| GO:0030865 |     | 0.00475071458473899                                            | 21.9327731092437 | 0.103868244412151  |   |
| 2          | 19  | cortical cytoskeleton organization                             |                  |                    |   |
| GO:0002573 |     | 0.00486334739263922                                            | 6.28143250688705 | 0.683343713237838  |   |
| 4          | 125 | myeloid leukocyte differentiation                              |                  |                    |   |
| GO:0002455 |     | 0.00538456951437865                                            | 9.11078098471986 | 0.355338730883676  |   |
| 3          | 65  | humoral immune response mediated by circulating immunoglobulin |                  |                    |   |
| GO:0046632 |     | 0.00538456951437865                                            | 9.11078098471986 | 0.355338730883676  |   |
| 3          | 65  | alpha-beta T cell differentiation                              |                  |                    |   |
| GO:0002446 |     | 0.00579311705311845                                            | 19.6213260423787 | 0.114801743823957  |   |
| 2          | 21  | neutrophil mediated immunity                                   |                  |                    |   |
| GO:0031529 |     | 0.00579311705311845                                            | 19.6213260423787 | 0.114801743823957  |   |
| 2          | 21  | ruffle organization                                            |                  |                    |   |
| GO:0042094 |     | 0.00579311705311845                                            | 19.6213260423787 | 0.114801743823957  |   |
| 2          | 21  | interleukin-2 biosynthetic process                             |                  |                    |   |
| GO:0046633 |     | 0.00579311705311845                                            | 19.6213260423787 | 0.114801743823957  |   |
| 2          | 21  | alpha-beta T cell proliferation                                |                  |                    |   |
| GO:0032609 |     | 0.00585952701430043                                            | 8.82483552631579 | 0.366272230295481  |   |
| 3          | 67  | interferon-gamma production                                    |                  |                    |   |
| GO:0010543 |     | 0.00634996031081422                                            | 18.638961038961  | 0.12026849352986   | 2 |
| 22         |     | regulation of platelet activation                              |                  |                    |   |
| GO:0030225 |     | 0.00634996031081422                                            | 18.638961038961  | 0.12026849352986   | 2 |
| 22         |     | macrophage differentiation                                     |                  |                    |   |
| GO:0032673 |     | 0.00693020683008556                                            | 17.7501546072975 | 0.125735243235762  |   |
| 2          | 23  | regulation of interleukin-4 production                         |                  |                    |   |
| GO:0042554 |     | 0.00693020683008556                                            | 17.7501546072975 | 0.125735243235762  |   |
| 2          | 23  | superoxide anion generation                                    |                  |                    |   |
| GO:0043029 |     | 0.00693020683008556                                            | 17.7501546072975 | 0.125735243235762  |   |
| 2          | 23  | T cell homeostasis                                             |                  |                    |   |
| GO:0002761 |     | 0.00743179406559731                                            | 8.06503759398496 | 0.399072728530898  |   |
| 3          | 73  | regulation of myeloid leukocyte differentiation                |                  |                    |   |
| GO:0071706 |     | 0.00743179406559731                                            | 8.06503759398496 | 0.399072728530898  |   |
| 3          | 73  | tumor necrosis factor superfamily cytokine production          |                  |                    |   |
| GO:0046006 |     | 0.00753359074695003                                            | 16.9421487603306 | 0.131201992941665  |   |
| 2          | 24  | regulation of activated T cell proliferation                   |                  |                    |   |
| GO:0030099 |     | 0.00804466067507511                                            | 4.30667153640127 | 1.24095218323991   |   |
| 5          | 227 | myeloid cell differentiation                                   |                  |                    |   |
| GO:0030858 |     | 0.00815984834055658                                            | 16.2044042913608 | 0.136668742647568  |   |
| 2          | 25  | positive regulation of epithelial cell differentiation         |                  |                    |   |
| GO:0032855 |     | 0.00815984834055658                                            | 16.2044042913608 | 0.136668742647568  |   |
| 2          | 25  | positive regulation of Rac GTPase activity                     |                  |                    |   |
| GO:0042092 |     | 0.00815984834055658                                            | 16.2044042913608 | 0.136668742647568  |   |
| 2          | 25  | type 2 immune response                                         |                  |                    |   |
| GO:0043666 |     | 0.00815984834055658                                            | 16.2044042913608 | 0.136668742647568  |   |
| 2          | 25  | regulation of phosphoprotein phosphatase activity              |                  |                    |   |
| GO:0050798 |     | 0.00880871801818296                                            | 15.5281385281385 | 0.14213549235347   |   |
| 2          | 26  | activated T cell proliferation                                 |                  |                    |   |

Stable4\_20PerPair

|                                                                |                      |                                                  |                     |         |      |                    |     |  |   |
|----------------------------------------------------------------|----------------------|--------------------------------------------------|---------------------|---------|------|--------------------|-----|--|---|
| GO:0051004                                                     | 0.00880871801818296  | 15.5281385281385                                 | 0.14213549235347    |         |      |                    |     |  |   |
| 2                                                              | 26                   | regulation of lipoprotein lipase activity        |                     |         |      |                    |     |  |   |
| GO:0032633                                                     | 0.00947994030032968  | 14.905974025974                                  | 0.147602242059373   |         |      |                    |     |  | 2 |
| 27                                                             |                      | interleukin-4 production                         |                     |         |      |                    |     |  |   |
| GO:0032722                                                     | 0.00947994030032968  | 14.905974025974                                  | 0.147602242059373   |         |      |                    |     |  | 2 |
| 27                                                             |                      | positive regulation of chemokine production      |                     |         |      |                    |     |  |   |
| GO:0042113                                                     | 0.00982247367293868  | 5.0910067114094                                  | 0.836412705003114   |         |      |                    |     |  | 4 |
| 153                                                            |                      | B cell activation                                |                     |         |      |                    |     |  |   |
| Tissue: whole_Blood=>Thyroid Type: asymmetric                  |                      |                                                  |                     |         |      |                    |     |  |   |
| SourceGene: AMY2A(ENSG00000243480.3)                           |                      |                                                  |                     |         |      |                    |     |  |   |
| TargetGeneSet: CELA3B CELA3A CRNN SPRR3 CPB1 PRL CLPS CGA CPA2 |                      |                                                  |                     |         |      |                    |     |  |   |
| CPA1                                                           | PRSS1                | PNLIP PNLIPRP2                                   | KRT4                | PLA2G1B | RP11 | RHCG               | GP2 |  |   |
| CTRB2                                                          | CTRB1                | KRTAP3-2                                         | KRTAP11-1           | BRD1    |      |                    |     |  |   |
| GOBPID                                                         | Pvalue               | OddsRatio                                        | ExpCount            | Count   | Size | Term               |     |  |   |
| GO:0007586                                                     | 1.51426135092439e-12 | 87.3054074638233                                 |                     |         |      | 0.158397342744447  |     |  |   |
| 8                                                              | 109                  | digestion                                        |                     |         |      |                    |     |  |   |
| GO:0044241                                                     | 4.45140475278301e-09 | 308.427807486631                                 |                     |         |      | 0.021797799460245  |     |  |   |
| 4                                                              | 15                   | lipid digestion                                  |                     |         |      |                    |     |  |   |
| GO:0022617                                                     | 1.83105550247234e-05 | 72.7121212121212                                 |                     |         |      | 0.0523147187045879 |     |  |   |
| 3                                                              | 36                   | extracellular matrix disassembly                 |                     |         |      |                    |     |  |   |
| GO:0016042                                                     | 0.000366898473453374 | 14.0306475531389                                 |                     |         |      | 0.351671164625285  |     |  |   |
| 4                                                              | 242                  | lipid catabolic process                          |                     |         |      |                    |     |  |   |
| GO:0008202                                                     | 0.000586693720234097 | 12.3398692810458                                 |                     |         |      | 0.398173136807141  |     |  |   |
| 4                                                              | 274                  | steroid metabolic process                        |                     |         |      |                    |     |  |   |
| GO:0001523                                                     | 0.0014428580814799   | 40.9473684210526                                 |                     |         |      | 0.0566742785966369 |     |  |   |
| 2                                                              | 39                   | retinoid metabolic process                       |                     |         |      |                    |     |  |   |
| GO:0030198                                                     | 0.00155770974328471  | 15.0548523206751                                 |                     |         |      | 0.233963047539963  |     |  |   |
| 3                                                              | 161                  | extracellular matrix organization                |                     |         |      |                    |     |  |   |
| GO:0043062                                                     | 0.00158561961605076  | 14.9591194968553                                 |                     |         |      | 0.235416234170646  |     |  |   |
| 3                                                              | 162                  | extracellular structure organization             |                     |         |      |                    |     |  |   |
| GO:0016101                                                     | 0.00159389296614628  | 38.8421052631579                                 |                     |         |      | 0.0595806518580029 |     |  |   |
| 2                                                              | 41                   | diterpenoid metabolic process                    |                     |         |      |                    |     |  |   |
| GO:0006721                                                     | 0.0023624467699341   | 31.5394736842105                                 |                     |         |      | 0.0726593315341499 |     |  |   |
| 2                                                              | 50                   | terpenoid metabolic process                      |                     |         |      |                    |     |  |   |
| GO:0032275                                                     | 0.00435352854395898  | 360.7                                            | 0.00435955989204899 |         |      | 1                  |     |  | 3 |
|                                                                |                      | luteinizing hormone secretion                    |                     |         |      |                    |     |  |   |
| GO:0044240                                                     | 0.00435352854395898  | 360.7                                            | 0.00435955989204899 |         |      | 1                  |     |  | 3 |
|                                                                |                      | multicellular organismal lipid catabolic process |                     |         |      |                    |     |  |   |
| GO:0070634                                                     | 0.00435352854395898  | 360.7                                            | 0.00435955989204899 |         |      | 1                  |     |  | 3 |
|                                                                |                      | transepithelial ammonium transport               |                     |         |      |                    |     |  |   |
| GO:0072488                                                     | 0.00435352854395898  | 360.7                                            | 0.00435955989204899 |         |      | 1                  |     |  | 3 |
|                                                                |                      | ammonium transmembrane transport                 |                     |         |      |                    |     |  |   |
| GO:0006720                                                     | 0.00483544160740886  | 21.593984962406                                  | 0.104629437409176   |         |      |                    |     |  | 2 |
| 72                                                             |                      | isoprenoid metabolic process                     |                     |         |      |                    |     |  |   |
| GO:0009791                                                     | 0.00551129037912381  | 20.1473684210526                                 |                     |         |      | 0.111895370562591  |     |  |   |
| 2                                                              | 77                   | post-embryonic development                       |                     |         |      |                    |     |  |   |
| GO:0032431                                                     | 0.00580068911293552  | 240.45                                           | 0.00581274652273199 |         |      | 1                  |     |  | 4 |
|                                                                |                      | activation of phospholipase A2 activity          |                     |         |      |                    |     |  |   |
| GO:0006066                                                     | 0.00641700421826788  | 8.97782002534854                                 |                     |         |      | 0.386547643761677  |     |  |   |
| 3                                                              | 266                  | alcohol metabolic process                        |                     |         |      |                    |     |  |   |
| GO:0032430                                                     | 0.00724584627557323  | 180.325                                          | 0.00726593315341499 |         |      | 1                  |     |  | 5 |
|                                                                |                      | positive regulation of phospholipase A2 activity |                     |         |      |                    |     |  |   |
| GO:0030855                                                     | 0.00753766248507537  | 8.45340501792115                                 |                     |         |      | 0.409798629852605  |     |  |   |
| 3                                                              | 282                  | epithelial cell differentiation                  |                     |         |      |                    |     |  |   |
| GO:0071845                                                     | 0.0076854182153757   | 8.3920521945433                                  | 0.412705003113971   |         |      |                    |     |  | 3 |
| 284                                                            |                      | cellular component disassembly at cellular level |                     |         |      |                    |     |  |   |
| GO:0022411                                                     | 0.00798610278699269  | 8.2719298245614                                  | 0.418517749636703   |         |      |                    |     |  | 3 |
| 288                                                            |                      | cellular component disassembly                   |                     |         |      |                    |     |  |   |
| GO:0000244                                                     | 0.00868900266683825  | 144.25                                           | 0.00871911978409799 |         |      | 1                  |     |  | 6 |
|                                                                |                      | assembly of spliceosomal tri-snRNP               |                     |         |      |                    |     |  |   |
| GO:0002385                                                     | 0.00868900266683825  | 144.25                                           | 0.00871911978409799 |         |      | 1                  |     |  | 6 |
|                                                                |                      | mucosal immune response                          |                     |         |      |                    |     |  |   |
| GO:0015696                                                     | 0.00868900266683825  | 144.25                                           | 0.00871911978409799 |         |      | 1                  |     |  | 6 |



STable4\_20PerPair

|                                               |                     |           |                      |                  |                   |                                                             |                    |       |        |
|-----------------------------------------------|---------------------|-----------|----------------------|------------------|-------------------|-------------------------------------------------------------|--------------------|-------|--------|
| ammonium transport                            |                     |           |                      |                  |                   |                                                             |                    |       |        |
| GO:0019374                                    | 0.00868900266683825 | 144.25    | 0.00871911978409799  | 1                | 6                 |                                                             |                    |       |        |
| galactolipid metabolic process                |                     |           |                      |                  |                   |                                                             |                    |       |        |
| GO:0045056                                    | 0.00868900266683825 | 144.25    | 0.00871911978409799  | 1                | 6                 |                                                             |                    |       |        |
| transcytosis                                  |                     |           |                      |                  |                   |                                                             |                    |       |        |
| Tissue: whole_Blood=>Thyroid Type: asymmetric |                     |           |                      |                  |                   |                                                             |                    |       |        |
| SourceGene: CASP10(ENSG00000003400.10)        |                     |           |                      |                  |                   |                                                             |                    |       |        |
| TargetGeneSet:                                | SF3A3               | SELRC1    | SETDB1               | ADAR             | RP11              | URB2                                                        | RHOB               | WDR43 |        |
| POLR1B                                        | VPRBP               | RP13      | NOP14                | SRP72            | CCT6P1            | MAK16                                                       | NCBP1              | NGB   | HNRNPF |
| NOLC1                                         | BET1L               | NAT10     | WDR74                | RERG             | NUFIP1            | EXOC5                                                       | NIP7               | USP10 | DPH1   |
| SEZ6                                          | CCDC43              | EFTUD2    | KPNB1                | ATCAY            | TNFSF14           | ZNF317                                                      | BRD4               | AKAP8 | ZNF8   |
| BACH1                                         | BRWD1-IT2           | COL18A1   | EP300                |                  |                   |                                                             |                    |       |        |
| GOBPID                                        | Pvalue              | OddsRatio | ExpCount             | Count            | Size              | Term                                                        |                    |       |        |
| GO:0071843                                    | 10                  | 239       | 2.21202167880767e-10 | 23.8259993281827 |                   | cellular component biogenesis at cellular level             | 0.595391322399834  |       |        |
| GO:0022613                                    | 225                 |           | 2.99435719193124e-09 | 21.912037037037  | 0.560514843263442 | ribonucleoprotein complex biogenesis                        |                    | 9     |        |
| GO:0022618                                    | 6                   | 95        | 1.14307459859597e-07 | 32.1932584269663 |                   | ribonucleoprotein complex assembly                          | 0.236661822711231  |       |        |
| GO:0071826                                    | 6                   | 100       | 1.55388656106245e-07 | 30.4702127659574 |                   | ribonucleoprotein complex subunit organization              | 0.249117708117085  |       |        |
| GO:0000377                                    | 6                   | 204       | 1.00603769758897e-05 | 14.3606060606061 |                   | RNA splicing, via transesterification reactions with bulged | 0.508200124558854  |       |        |
| adenosine as nucleophile                      |                     |           |                      |                  |                   |                                                             |                    |       |        |
| GO:0000398                                    | 6                   | 204       | 1.00603769758897e-05 | 14.3606060606061 |                   | nuclear mRNA splicing, via spliceosome                      | 0.508200124558854  |       |        |
| GO:0000375                                    | 6                   | 209       | 1.15505591914944e-05 | 14.0019704433498 |                   | RNA splicing, via transesterification reactions             | 0.520656009964708  |       |        |
| GO:0042254                                    | 5                   | 149       | 3.17423559617724e-05 | 15.9845430107527 |                   | ribosome biogenesis                                         | 0.371185385094457  |       |        |
| GO:0006397                                    | 7                   | 399       | 4.84742666700223e-05 | 8.63485221674877 |                   | mRNA processing                                             | 0.99397965538717   |       |        |
| GO:0007000                                    | 2                   | 5         | 6.0056443209649e-05  | 282.588235294118 |                   | nucleolus organization                                      | 0.0124558854058543 |       |        |
| GO:0008380                                    | 6                   | 323       | 0.000131646102897489 | 8.89463722397476 |                   | RNA splicing                                                | 0.804650197218186  |       |        |
| GO:0090305                                    |                     |           | 0.000508815473285125 | 21.75            | 0.156944156113764 | positive regulation of DNA binding                          |                    | 3     | 63     |
| nucleic acid phosphodiester bond hydrolysis   |                     |           |                      |                  |                   |                                                             |                    |       |        |
| GO:0042255                                    | 2                   | 16        | 0.000708352526025667 | 60.5084033613445 |                   | ribosome assembly                                           | 0.0398588332987337 |       |        |
| GO:0006913                                    | 318                 |           | 0.00107660461177516  | 7.2668246933938  | 0.792194311812331 | nucleocytoplasmic transport                                 |                    | 5     |        |
| GO:0051169                                    | 5                   | 321       | 0.00112263877896694  | 7.19630461412822 |                   | nuclear transport                                           | 0.799667843055844  |       |        |
| GO:0006606                                    | 4                   | 195       | 0.00135078207165987  | 9.30890052356021 |                   | protein import into nucleus                                 | 0.485779530828316  |       |        |
| GO:0051170                                    | 4                   | 198       | 0.0014289298286985   | 9.16301546391753 |                   | nuclear import                                              | 0.493253062071829  |       |        |
| GO:0043388                                    | 2                   | 27        | 0.00203655412226881  | 33.8588235294118 |                   | positive regulation of DNA binding                          | 0.067261781191613  |       |        |
| GO:0034504                                    | 4                   | 222       | 0.00217167266002722  | 8.14048165137615 |                   | protein localization to nucleus                             | 0.553041312019929  |       |        |
| GO:0006354                                    | 3                   | 108       | 0.00242256207847983  | 12.3896103896104 |                   | DNA-dependent transcription, elongation                     | 0.269047124766452  |       |        |
| GO:0000387                                    | 2                   | 31        | 0.00268117418933943  | 29.1805273833671 |                   | spliceosomal snRNP assembly                                 | 0.0772264895162964 |       |        |
| GO:0042306                                    | 3                   | 116       | 0.00296692122864391  | 11.5060337892196 |                   | regulation of protein import into nucleus                   | 0.288976541415819  |       |        |
| GO:1900180                                    | 3                   | 116       | 0.00296692122864391  | 11.5060337892196 |                   | regulation of protein localization to nucleus               | 0.288976541415819  |       |        |
| GO:0000060                                    | 2                   | 37        | 0.00380429496468588  | 24.1680672268908 |                   | protein import into nucleus, translocation                  | 0.0921735520033216 |       |        |
| GO:0017038                                    |                     |           | 0.00405042757761231  | 6.80528846153846 |                   |                                                             | 0.657670749429105  |       |        |

STable4\_20PerPair

|            |     |                                                                                                                                                     |                  |                     |   |                     |   |
|------------|-----|-----------------------------------------------------------------------------------------------------------------------------------------------------|------------------|---------------------|---|---------------------|---|
| 4          | 264 | protein import                                                                                                                                      |                  |                     |   |                     |   |
| GO:0046822 |     | 0.00473504233258129                                                                                                                                 | 9.68860244233379 |                     |   | 0.341291260120407   |   |
| 3          | 137 | regulation of nucleocytoplasmic transport                                                                                                           |                  |                     |   |                     |   |
| GO:0033157 |     | 0.00502965251544117                                                                                                                                 | 9.47445255474453 |                     |   | 0.348764791363919   |   |
| 3          | 140 | regulation of intracellular protein transport                                                                                                       |                  |                     |   |                     |   |
| GO:0070301 |     | 0.00510998020340955                                                                                                                                 | 20.622668579627  | 0.107120614490347   |   |                     | 2 |
| 43         |     | cellular response to hydrogen peroxide                                                                                                              |                  |                     |   |                     |   |
| GO:0006997 |     | 0.00558484740037423                                                                                                                                 | 19.6607387140903 |                     |   | 0.112102968652688   |   |
| 2          | 45  | nucleus organization                                                                                                                                |                  |                     |   |                     |   |
| GO:0043967 |     | 0.00582960250515155                                                                                                                                 | 19.2125668449198 |                     |   | 0.114594145733859   |   |
| 2          | 46  | histone H4 acetylation                                                                                                                              |                  |                     |   |                     |   |
| GO:0033365 |     | 0.00599990723060243                                                                                                                                 | 4.80665839536807 |                     |   | 1.17832675939381    |   |
| 5          | 473 | protein localization to organelle                                                                                                                   |                  |                     |   |                     |   |
| GO:0006605 |     | 0.00605302286071859                                                                                                                                 | 4.79606575417842 |                     |   | 1.18081793647498    |   |
| 5          | 474 | protein targeting                                                                                                                                   |                  |                     |   |                     |   |
| GO:0031047 |     | 0.00607920608121654                                                                                                                                 | 18.7843137254902 |                     |   | 0.11708532281503    |   |
| 2          | 47  | gene silencing by RNA                                                                                                                               |                  |                     |   |                     |   |
| GO:0051098 |     | 0.00727676494327996                                                                                                                                 | 8.25593514765489 |                     |   | 0.398588332987337   |   |
| 3          | 160 | regulation of binding                                                                                                                               |                  |                     |   |                     |   |
| GO:0000491 |     | 0.00745544346333527                                                                                                                                 | 205.9            | 0.00747353124351256 | 1 |                     | 3 |
|            |     | small nucleolar ribonucleoprotein complex assembly                                                                                                  |                  |                     |   |                     |   |
| GO:0000492 |     | 0.00745544346333527                                                                                                                                 | 205.9            | 0.00747353124351256 | 1 |                     | 3 |
|            |     | box C/D snoRNP assembly                                                                                                                             |                  |                     |   |                     |   |
| GO:0044154 |     | 0.00745544346333527                                                                                                                                 | 205.9            | 0.00747353124351256 | 1 |                     | 3 |
|            |     | histone H3-K14 acetylation                                                                                                                          |                  |                     |   |                     |   |
| GO:0050434 |     | 0.00824768231140087                                                                                                                                 | 15.9400665926748 |                     |   | 0.137014739464397   |   |
| 2          | 55  | positive regulation of viral transcription                                                                                                          |                  |                     |   |                     |   |
| GO:0032386 |     | 0.00973668760545556                                                                                                                                 | 7.3974025974026  | 0.443429520448412   |   |                     | 3 |
| 178        |     | regulation of intracellular transport                                                                                                               |                  |                     |   |                     |   |
| GO:0000447 |     | 0.00992856112912421                                                                                                                                 | 137.257142857143 |                     |   | 0.00996470832468341 |   |
| 1          | 4   | endonucleolytic cleavage in ITS1 to separate SSU-rRNA from 5.8S rRNA and LSU-rRNA from tricistronic rRNA transcript (SSU-rRNA, 5.8S rRNA, LSU-rRNA) |                  |                     |   |                     |   |
| GO:0000469 |     | 0.00992856112912421                                                                                                                                 | 137.257142857143 |                     |   | 0.00996470832468341 |   |
| 1          | 4   | cleavage involved in rRNA processing                                                                                                                |                  |                     |   |                     |   |
| GO:0000478 |     | 0.00992856112912421                                                                                                                                 | 137.257142857143 |                     |   | 0.00996470832468341 |   |
| 1          | 4   | endonucleolytic cleavage involved in rRNA processing                                                                                                |                  |                     |   |                     |   |
| GO:0000479 |     | 0.00992856112912421                                                                                                                                 | 137.257142857143 |                     |   | 0.00996470832468341 |   |
| 1          | 4   | endonucleolytic cleavage of tricistronic rRNA transcript (SSU-rRNA, 5.8S rRNA, LSU-rRNA)                                                            |                  |                     |   |                     |   |
| GO:0000966 |     | 0.00992856112912421                                                                                                                                 | 137.257142857143 |                     |   | 0.00996470832468341 |   |
| 1          | 4   | RNA 5'-end processing                                                                                                                               |                  |                     |   |                     |   |
| GO:0006610 |     | 0.00992856112912421                                                                                                                                 | 137.257142857143 |                     |   | 0.00996470832468341 |   |
| 1          | 4   | ribosomal protein import into nucleus                                                                                                               |                  |                     |   |                     |   |
| GO:0008588 |     | 0.00992856112912421                                                                                                                                 | 137.257142857143 |                     |   | 0.00996470832468341 |   |
| 1          | 4   | release of cytoplasmic sequestered NF-kappaB                                                                                                        |                  |                     |   |                     |   |
| GO:0018076 |     | 0.00992856112912421                                                                                                                                 | 137.257142857143 |                     |   | 0.00996470832468341 |   |
| 1          | 4   | N-terminal peptidyl-lysine acetylation                                                                                                              |                  |                     |   |                     |   |
| GO:0060298 |     | 0.00992856112912421                                                                                                                                 | 137.257142857143 |                     |   | 0.00996470832468341 |   |
| 1          | 4   | positive regulation of sarcomere organization                                                                                                       |                  |                     |   |                     |   |
| GO:0061418 |     | 0.00992856112912421                                                                                                                                 | 137.257142857143 |                     |   | 0.00996470832468341 |   |
| 1          | 4   | regulation of transcription from RNA polymerase II promoter in response to hypoxia                                                                  |                  |                     |   |                     |   |
| GO:2000171 |     | 0.00992856112912421                                                                                                                                 | 137.257142857143 |                     |   | 0.00996470832468341 |   |
| 1          | 4   | negative regulation of dendrite development                                                                                                         |                  |                     |   |                     |   |
|            |     | Tissue: Thyroid=>whole_Blood Type: asymmetric                                                                                                       |                  |                     |   |                     |   |
|            |     | SourceGene: CLPP(ENSG00000125656.3)                                                                                                                 |                  |                     |   |                     |   |
|            |     | TargetGeneSet: ATRX KCNN3 TOR3A BUB1 KIAA1524 NCAPG CCNA2                                                                                           |                  |                     |   |                     |   |
|            |     | RANBP3L TTK RP11 FBXO5 EZH2 GINS4 MCM4 MCM10 RRM1 CHEK1                                                                                             |                  |                     |   |                     |   |
|            |     | CCNB2 SHCBP1 C2CD2                                                                                                                                  |                  |                     |   |                     |   |
|            |     | GOBPID Pvalue OddsRatio ExpCount Count Size Term                                                                                                    |                  |                     |   |                     |   |
| GO:0000075 |     | 5.71053787162181e-09                                                                                                                                | 42.2948936170213 |                     |   | 0.284686180887136   |   |
| 7          | 242 | cell cycle checkpoint                                                                                                                               |                  |                     |   |                     |   |
| GO:0010564 |     | 8.22417850551875e-09                                                                                                                                | 30.7126436781609 |                     |   | 0.487025119368902   |   |

Stable4\_20PerPair

|            |     |                                                              |                  |                    |   |
|------------|-----|--------------------------------------------------------------|------------------|--------------------|---|
| 8          | 414 | regulation of cell cycle process                             |                  |                    |   |
| GO:0071156 |     | 1.04358611884653e-08                                         | 38.6143968871595 | 0.310566742785966  |   |
| 7          | 264 | regulation of cell cycle arrest                              |                  |                    |   |
| GO:0045786 |     | 1.25557048159008e-08                                         | 29.018389018389  | 0.514082070444952  | 8 |
| 437        |     | negative regulation of cell cycle                            |                  |                    |   |
| GO:0000280 |     | 7.26777836398913e-08                                         | 28.7571428571429 | 0.411736212026849  |   |
| 7          | 350 | nuclear division                                             |                  |                    |   |
| GO:0007067 |     | 7.26777836398913e-08                                         | 28.7571428571429 | 0.411736212026849  |   |
| 7          | 350 | mitosis                                                      |                  |                    |   |
| GO:0000087 |     | 8.81243477332554e-08                                         | 27.9226628895184 | 0.423500103799045  |   |
| 7          | 360 | M phase of mitotic cell cycle                                |                  |                    |   |
| GO:0007050 |     | 1.04321868816989e-07                                         | 27.2110497237569 | 0.434087606394021  |   |
| 7          | 369 | cell cycle arrest                                            |                  |                    |   |
| GO:0048285 |     | 1.06267944644013e-07                                         | 27.1341597796143 | 0.435263995571241  |   |
| 7          | 370 | organelle fission                                            |                  |                    |   |
| GO:0045839 |     | 1.16683968809599e-07                                         | 123.059829059829 | 0.0470555670887828 |   |
| 4          | 40  | negative regulation of mitosis                               |                  |                    |   |
| GO:0051784 |     | 1.16683968809599e-07                                         | 123.059829059829 | 0.0470555670887828 |   |
| 4          | 40  | negative regulation of nuclear division                      |                  |                    |   |
| GO:0051329 |     | 1.25211051332442e-07                                         | 26.460752688172  | 0.445851498166217  | 7 |
| 379        |     | interphase of mitotic cell cycle                             |                  |                    |   |
| GO:0051325 |     | 1.44378048516681e-07                                         | 25.8889473684211 | 0.455262611583973  |   |
| 7          | 387 | interphase                                                   |                  |                    |   |
| GO:0007088 |     | 2.87596821198805e-06                                         | 52.5641025641026 | 0.103522247595322  |   |
| 4          | 88  | regulation of mitosis                                        |                  |                    |   |
| GO:0051783 |     | 2.87596821198805e-06                                         | 52.5641025641026 | 0.103522247595322  |   |
| 4          | 88  | regulation of nuclear division                               |                  |                    |   |
| GO:0010948 |     | 4.07345040441317e-06                                         | 47.9665551839465 | 0.112933361013079  |   |
| 4          | 96  | negative regulation of cell cycle process                    |                  |                    |   |
| GO:0045841 |     | 8.64692470749185e-06                                         | 96.4419642857143 | 0.0411736212026849 |   |
| 3          | 35  | negative regulation of mitotic metaphase/anaphase transition |                  |                    |   |
| GO:0006260 |     | 1.08952418588103e-05                                         | 22.4508871989861 | 0.315272299494845  |   |
| 5          | 268 | DNA replication                                              |                  |                    |   |
| GO:0030071 |     | 1.62097344171137e-05                                         | 77.1107142857143 | 0.0505847346204415 |   |
| 3          | 43  | regulation of mitotic metaphase/anaphase transition          |                  |                    |   |
| GO:0007091 |     | 1.86112825578916e-05                                         | 73.4285714285714 | 0.0529375129748806 |   |
| 3          | 45  | mitotic metaphase/anaphase transition                        |                  |                    |   |
| GO:0007346 |     | 1.97254232303307e-05                                         | 19.7651006711409 | 0.35644592069753   |   |
| 5          | 303 | regulation of mitotic cell cycle                             |                  |                    |   |
| GO:0010639 |     | 2.85819821851923e-05                                         | 28.7199597787833 | 0.184693100823472  |   |
| 4          | 157 | negative regulation of organelle organization                |                  |                    |   |
| GO:0051301 |     | 0.000132680453138237                                         | 13.0378448918717 | 0.531727908103245  |   |
| 5          | 452 | cell division                                                |                  |                    |   |
| GO:0051129 |     | 0.000341146021950791                                         | 14.7985347985348 | 0.350563974811432  |   |
| 4          | 298 | negative regulation of cellular component organization       |                  |                    |   |
| GO:0007093 |     | 0.000536490187489596                                         | 22.5283613445378 | 0.16351809563352   |   |
| 3          | 139 | mitotic cell cycle checkpoint                                |                  |                    |   |
| GO:0051320 |     | 0.000582809827051627                                         | 21.8785714285714 | 0.168223652342398  |   |
| 3          | 143 | S phase                                                      |                  |                    |   |
| GO:0031572 |     | 0.000593664129512498                                         | 66.2298850574713 | 0.0364680644938067 |   |
| 2          | 31  | G2/M transition DNA damage checkpoint                        |                  |                    |   |
| GO:0000086 |     | 0.000594777118110322                                         | 21.7218844984802 | 0.169400041519618  |   |
| 3          | 144 | G2/M transition of mitotic cell cycle                        |                  |                    |   |
| GO:0007094 |     | 0.000673164262056883                                         | 61.9483870967742 | 0.0388208428482458 |   |
| 2          | 33  | mitotic cell cycle spindle assembly checkpoint               |                  |                    |   |
| GO:0006271 |     | 0.000714742559025276                                         | 60.0083333333333 | 0.0399972320254654 |   |
| 2          | 34  | DNA strand elongation involved in DNA replication            |                  |                    |   |
| GO:0071173 |     | 0.000714742559025276                                         | 60.0083333333333 | 0.0399972320254654 |   |
| 2          | 34  | spindle assembly checkpoint                                  |                  |                    |   |
| GO:0071174 |     | 0.000801542709238449                                         | 56.4705882352941 | 0.0423500103799045 |   |
| 2          | 36  | mitotic cell cycle spindle checkpoint                        |                  |                    |   |
| GO:0022616 |     | 0.000846759411781415                                         | 54.8533333333333 | 0.0435263995571241 |   |
| 2          | 37  | DNA strand elongation                                        |                  |                    |   |

Stable4\_20PerPair

|                                                                      |                                                                    |                          |                       |
|----------------------------------------------------------------------|--------------------------------------------------------------------|--------------------------|-----------------------|
| GO:0031576                                                           | 0.000989645204184707                                               | 50.5122807017544         | 0.0470555670887828    |
| 2 40                                                                 | G2/M transition checkpoint                                         |                          |                       |
| GO:0031577                                                           | 0.00109090652425899                                                | 47.98 0.0494083454432219 | 2 42                  |
| spindle checkpoint                                                   |                                                                    |                          |                       |
| GO:0000082                                                           | 0.00124909903274545                                                | 16.6873536299766         | 0.21880838696284      |
| 3 186                                                                | G1/S transition of mitotic cell cycle                              |                          |                       |
| GO:0033043                                                           | 0.00148433095390793                                                | 9.85530716423165         | 0.51878762715383      |
| 4 441                                                                | regulation of organelle organization                               |                          |                       |
| GO:0046602                                                           | 0.00352526115515339                                                | 451 0.00352916753165871  | 1 3                   |
| regulation of mitotic centrosome separation                          |                                                                    |                          |                       |
| GO:0000226                                                           | 0.00357483858317044                                                | 11.4135338345865         | 0.316448688672064     |
| 3 269                                                                | microtubule cytoskeleton organization                              |                          |                       |
| GO:0000216                                                           | 0.0038051697756915                                                 | 24.8606060606061         | 0.092934745000346     |
| 2 79                                                                 | M/G1 transition of mitotic cell cycle                              |                          |                       |
| GO:0007051                                                           | 0.00390004462103452                                                | 24.5401709401709         | 0.0941111341775656    |
| 2 80                                                                 | spindle organization                                               |                          |                       |
| GO:0000079                                                           | 0.00419126352725067                                                | 23.6263374485597         | 0.0976403017092243    |
| 2 83                                                                 | regulation of cyclin-dependent protein kinase activity             |                          |                       |
| GO:0033044                                                           | 0.00419126352725067                                                | 23.6263374485597         | 0.0976403017092243    |
| 2 83                                                                 | regulation of chromosome organization                              |                          |                       |
| GO:0000212                                                           | 0.00469774665905387                                                | 300.645833333333         | 0.00470555670887828   |
| 1 4                                                                  | meiotic spindle organization                                       |                          |                       |
| GO:0007144                                                           | 0.00469774665905387                                                | 300.645833333333         | 0.00470555670887828   |
| 1 4                                                                  | female meiosis I                                                   |                          |                       |
| GO:0060564                                                           | 0.00469774665905387                                                | 300.645833333333         | 0.00470555670887828   |
| 1 4                                                                  | negative regulation of mitotic anaphase-promoting complex activity |                          |                       |
| GO:0006261                                                           | 0.00523270528103615                                                | 21.0153846153846         | 0.10940419348142      |
| 2 93                                                                 | DNA-dependent DNA replication                                      |                          |                       |
| GO:0000089                                                           | 0.00586893363952024                                                | 225.46875                | 0.00588194588609785 1 |
| 5 mitotic metaphase                                                  |                                                                    |                          |                       |
| GO:0007100                                                           | 0.00586893363952024                                                | 225.46875                | 0.00588194588609785 1 |
| 5 mitotic centrosome separation                                      |                                                                    |                          |                       |
| GO:0035405                                                           | 0.00586893363952024                                                | 225.46875                | 0.00588194588609785 1 |
| 5 histone-threonine phosphorylation                                  |                                                                    |                          |                       |
| GO:0000244                                                           | 0.00703882344487339                                                | 180.3625                 | 0.00705833506331742 1 |
| 6 assembly of spliceosomal tri-snRNP                                 |                                                                    |                          |                       |
| GO:0006975                                                           | 0.00703882344487339                                                | 180.3625                 | 0.00705833506331742 1 |
| 6 DNA damage induced protein phosphorylation                         |                                                                    |                          |                       |
| GO:0048096                                                           | 0.00703882344487339                                                | 180.3625                 | 0.00705833506331742 1 |
| 6 chromatin-mediated maintenance of transcription                    |                                                                    |                          |                       |
| GO:0051299                                                           | 0.00703882344487339                                                | 180.3625                 | 0.00705833506331742 1 |
| 6 centrosome separation                                              |                                                                    |                          |                       |
| GO:0071313                                                           | 0.00703882344487339                                                | 180.3625                 | 0.00705833506331742 1 |
| 6 cellular response to caffeine                                      |                                                                    |                          |                       |
| GO:0007095                                                           | 0.00820741742212772                                                | 150.291666666667         | 0.00823472424053699   |
| 1 7 mitotic cell cycle G2/M transition DNA damage checkpoint         |                                                                    |                          |                       |
| GO:0051290                                                           | 0.00820741742212772                                                | 150.291666666667         | 0.00823472424053699   |
| 1 7 protein heterotetramerization                                    |                                                                    |                          |                       |
| GO:0071415                                                           | 0.00820741742212772                                                | 150.291666666667         | 0.00823472424053699   |
| 1 7 cellular response to purine-containing compound                  |                                                                    |                          |                       |
| GO:0043414                                                           | 0.00829916638042183                                                | 16.4574712643678         | 0.138813922911909     |
| 2 118 macromolecule methylation                                      |                                                                    |                          |                       |
| GO:0040029                                                           | 0.00884940838944783                                                | 15.9044444444444         | 0.143519479620787     |
| 2 122 regulation of gene expression, epigenetic                      |                                                                    |                          |                       |
| GO:0000077                                                           | 0.00999787074467132                                                | 14.9020833333333         | 0.152930593038544     |
| 2 130 DNA damage checkpoint                                          |                                                                    |                          |                       |
| Tissue: whole_Blood=>Thyroid                                         | Type: cluster                                                      |                          |                       |
| SourceGene: ENSG00000238943.1                                        |                                                                    |                          |                       |
| TargetGeneSet: ERRFI1 SPSB1 NMNAT1 DNAJC16 ARHGEF19-AS1 NECAP2 OTUD3 |                                                                    |                          |                       |
| LDLRAP1 XKR8 MED18 PRDX3P2 FAM167B HDAC1 ZMYM1 RNF220 FRRS1 CYB561D1 |                                                                    |                          |                       |
| POLR3GL BCL9 BOLA1 GOLPH3L VPS72 U6 SHE USP21 DUSP27 SELP            |                                                                    |                          |                       |
| DARS2 RNASEL SMG7 TRMT1L PTPG2 SOX13 RP11 INTS7 ATF3 DISP1 SMC6      |                                                                    |                          |                       |
| C2orf44 EHD3 CCDC75 PAPOLG SPR MRPL35 ZNF2 C2orf29 POLR1B CHN1       |                                                                    |                          |                       |

Stable4\_20PerPair

|                              |          |                                                                 |           |                  |          |                   |          |                   |             |
|------------------------------|----------|-----------------------------------------------------------------|-----------|------------------|----------|-------------------|----------|-------------------|-------------|
| CASP10                       | CREB1    | IDH1                                                            | TMEM169   | EIF4E2           | MSL3P1   | COPS8             | RNPEPL1  | RPL15             | TRANK1      |
| ZNF619                       | ZNF620   | NME6                                                            | NPRL2     | DUSP7            | SCT      | ABHD10            | ADPRH    | GATA2             | MSL2        |
| SLC25A36                     |          | ZBTB38                                                          | HPS3      | P2RY13           | SERPINI2 |                   | TNFSF10  | NAALADL2          |             |
| GCNT1P3                      | TACC3    | SORCS2                                                          | COX18     | CASP6            | ANKRD50  | CCDC127           | LPCAT1   | DAP               | C5orf51     |
| SLC38A9                      | PTCD2    | TNFAIP8                                                         | AFF4      | HARS2            | HMGXB3   | DOK3              | HIST1H3E |                   | ZKSCAN4     |
| ZKSCAN3                      | SCAND3   | ZBTB9                                                           | TAF8      | CAPN11           | MCM3     | DBIP1             | UBE2J1   | C6orf203          |             |
| ASF1A                        | AKAP12   | ELFN1                                                           | RNF216P1  |                  | VOPP1    | ZNF107            | TMEM60   | CROT              | SLC12A9     |
| PIK3CG                       | TNPO3    | FAM131B                                                         | ZNF786    | ZNF398           | GIMAP8   | GIMAP7            | GIMAP4   | SMARCD3           | CTA         |
| FUT10                        | PDP1     | WDR67                                                           | KLHL38    | ZNF696           | ZNF623   | TONSL             | RANBP6   | KLHL9             | DCAF10      |
| C9orf85                      | C9orf40  | CEP78                                                           | RMI1      | FOXE1            | RNF20    | C9orf80           | LHX6     | ZBTB34            | NAIF1 GLE1  |
| ABL1                         | NUDT5    | C10orf136                                                       |           | C10orf128        |          | ADO               | MSS51    | AP3M1             | ARHGAP19    |
| SUFU                         | SMC3     | C10orf88                                                        |           | TTC9C            | ZBTB3    | MEN1              | FOSL1    | C11orf82          |             |
| SLC36A4                      | RDX      | RNF214                                                          | ABCG4     | ZNF202           | HYLS1    | FLI1              | RAD52    | CD9               | LRMP        |
| BCDIN3D                      | FAM186A  | KRT7                                                            | RP3       | SMUG1            | SUOX     | TIMELESS          |          | ZBTB39            | ATXN7L3B    |
| TMPO                         | ANAPC7   | COQ5                                                            | RNF34     | FAM48A           | KBTBD6   | KBTBD7            | LPAR6    | ARL11             | TTC5        |
| RNASE1                       | ACIN1    | C14orf119                                                       |           | PROX2            | VASH1    | MIR656            | ZFP106   | ZSCAN29           | CTD         |
| CCNB2                        | DIS3L    | SMAD6                                                           | IQCH      | FEM1B            | ANP32A   | PEX11A            | CHD2     | NR2F2             | ASB7        |
| TFAP4                        | C16orf88 |                                                                 | PLK1      | TAOK2            | HIRIP3   | PLCG2             | SPNS2    | SLC16A13          |             |
| WRAP53                       | ARHGEF15 |                                                                 | PIGL      | LLGL1            | BLMH     | CRLF3             | RNF135   | PEX12             | PIP4K2B     |
| FAM134C                      | RUNDC1   | GJC1                                                            | DLX3      | PPP1R9B          | HEATR6   | APPBP2            | CD79B    | QRICH2            | USP36 CBX2  |
| SIRT7                        | RNU5F-3P |                                                                 | ZNF555    | PIAS4            | ZNF627   | ZNF625            | ZNF799   | ZNF443            | ZNF490 LYL1 |
| IL27RA                       | ANO8     | RAB3A                                                           | SUGP1     | KCTD15           | ZNF792   | THAP8             | CAPNS1   | ZNF420            | ZNF573      |
| SAMD4B                       | EID2     | ZNF780A                                                         | MAP3K10   | LTBP4            | MIA      | ZNF526            | ZNF221   | ZNF284            | ZNF225      |
| PVRL2                        | GEMIN7   | BLOC1S3                                                         | FBXO46    | PPP1R15A         |          | C19orf63          |          | ZNF616            | ZNF816      |
| ZNF677                       | ZNF765   | TMC4                                                            | ZNF264    | ZNF547           | ZNF549   | SLC52A3           | FAM110A  | PANK2             | ANKRD5 NANP |
| C20orf160                    |          | RP1                                                             | DNMT3B    | PXMP4            | RBL1     | SDC4              | ZSWIM3   | ZSWIM1            | ZFP64       |
| AURKA                        | CSTF1    | TAF4                                                            | C20orf151 |                  | SOX18    | RGS19             | CYR1     | BACE2             | C2CD2       |
| C22orf29                     |          | CRKL                                                            | ZNF70     | GTPBP1           | EFCAB6   | TLR8              | TCEANC   | SCML1             | ZFX         |
| GPR34                        | CXorf24  | RPL23AP83                                                       |           | FAM123B          | VSIG4    | MAGEC2            |          |                   |             |
| GOBPID                       | Pvalue   | OddsRatio                                                       |           | ExpCount         |          | Count             | Size     | Term              |             |
| GO:0033261                   | 4        | 0.00158554766356836                                             |           | 9.01398601398601 |          |                   |          | 0.510691301640025 |             |
|                              | 30       | regulation of S phase                                           |           |                  |          |                   |          |                   |             |
| GO:0045736                   | 18       | 0.00329117860132599                                             |           | 11.679012345679  |          | 0.306414780984015 |          | 3                 |             |
|                              |          | negative regulation of cyclin-dependent protein kinase activity |           |                  |          |                   |          |                   |             |
| GO:0010564                   | 15       | 0.00494738674276267                                             |           | 2.24685089346743 |          | 7.04753996263234  |          |                   |             |
|                              | 414      | regulation of cell cycle process                                |           |                  |          |                   |          |                   |             |
| GO:0021700                   | 8        | 0.00567986020378686                                             |           | 3.14957983193277 |          | 2.68964085530413  |          |                   |             |
|                              | 158      | developmental maturation                                        |           |                  |          |                   |          |                   |             |
| GO:0007090                   | 3        | 0.00590783962912106                                             |           | 9.21767381416504 |          | 0.374506954536018 |          |                   |             |
|                              | 22       | regulation of S phase of mitotic cell cycle                     |           |                  |          |                   |          |                   |             |
| GO:0045786                   | 15       | 0.00800200296448542                                             |           | 2.12085308056872 |          | 7.43906996055636  |          |                   |             |
|                              | 437      | negative regulation of cell cycle                               |           |                  |          |                   |          |                   |             |
| GO:0033233                   | 2        | 0.00960200448278314                                             |           | 16.6252927400468 |          | 0.153207390492007 |          |                   |             |
|                              | 9        | regulation of protein sumoylation                               |           |                  |          |                   |          |                   |             |
| Tissue: Whole_Blood=>Thyroid |          |                                                                 |           |                  |          |                   |          |                   |             |
| SourceGene:                  |          |                                                                 |           |                  |          |                   |          |                   |             |
| TargetGeneSet:               |          |                                                                 |           |                  |          |                   |          |                   |             |
| SCNM1                        | CELF3    | CCT3                                                            | IQGAP3    | CDC73            | ASPM     | URB2              | HEATR1   | EIF2B4            | MSH6        |
| PCBP1                        | NCAPH    | POU3F3                                                          | SSB       | NUP35            | PTPRN    | CLN5              | CHCHD4   | IFRD2             | ACTR8       |
| ZBTB11                       | GRPEL1   | WDR36                                                           | RBM22     | FBXW11           | HRH2     | BYSL              | HDAC2    | NKAIN2            | FBXO5       |
| SNORA29                      | EIF3B    | RNF216P1                                                        |           | THAP5            | CNOT4    | U1                | ABCF2    | NEIL2             | PPP2R2A     |
| BAALC                        | PLAA     | DCAF10                                                          | FRMD3     | METTL11A         |          | SURF6             | NGB      | BMS1              | HNRNPF      |
| NOLC1                        | ADRA2A   | TSSC4                                                           | C11orf46  |                  | STIP1    | NCAM1             | MPP2     | NOP2              | DDX23       |
| ZC3H10                       | INHBC    | TBK1                                                            | C12orf29  |                  | SART3    | NAA16             | TPTE2P3  | FAM70B            | RBM23       |
| SNORD116-15                  |          | BUB1B                                                           | GABPB1    | IDH3A            | FAM103A1 |                   | CTD      | E2F4              | CIRH1A      |
| HDODH                        | USP10    | CYBA                                                            | TSR1      | COIL             | FTSJ3    | MRPL38            | DOT1L    | ZNF77             | KHSRP       |
| GATAD2A                      | ZFP82    | GRWD1                                                           | PRMT1     | PEG3             | NOP56    | MCM3AP-AS1        |          | PARP4P3           | UBE2L3      |
| MIR221                       | MAGEH1   | EDA                                                             | FAM122C   | MAGEA8           |          |                   |          |                   |             |
| GOBPID                       | Pvalue   | OddsRatio                                                       |           | ExpCount         |          | Count             | Size     | Term              |             |
| GO:0022613                   | 15       | 1.90176179361749e-12                                            |           | 15.0948827292111 |          | 1.27672825410006  |          |                   |             |
|                              | 225      | ribonucleoprotein complex biogenesis                            |           |                  |          |                   |          |                   |             |
| GO:0071843                   | 239      | 4.54980692536357e-12                                            |           | 14.137460021322  |          | 1.35616912324407  |          | 15                |             |
|                              |          | cellular component biogenesis at cellular level                 |           |                  |          |                   |          |                   |             |

Stable4\_20PerPair

|            |                                                                                      |                  |                    |   |     |
|------------|--------------------------------------------------------------------------------------|------------------|--------------------|---|-----|
| GO:0042254 | 7.21942106151792e-10                                                                 | 15.9768320065319 | 0.845477821604041  |   |     |
| 11 149     | ribosome biogenesis                                                                  |                  |                    |   |     |
| GO:0006397 | 4.75183889232843e-08                                                                 | 7.47807486631016 | 2.26406477060411   |   |     |
| 14 399     | mRNA processing                                                                      |                  |                    |   |     |
| GO:0008380 | 1.3928037721635e-05                                                                  | 6.23713170039049 | 1.83281433810809   |   |     |
| 10 323     | RNA splicing                                                                         |                  |                    |   |     |
| GO:0022618 | 1.6118246502793e-05                                                                  | 12.6670609107037 | 0.539063040620026  |   |     |
| 6 95       | ribonucleoprotein complex assembly                                                   |                  |                    |   |     |
| GO:0071826 | 2.16151964470521e-05                                                                 | 11.9890817469205 | 0.567434779600028  |   |     |
| 6 100      | ribonucleoprotein complex subunit organization                                       |                  |                    |   |     |
| GO:0000375 | 2.38435884093652e-05                                                                 | 7.62027699341132 | 1.18593868936406   |   |     |
| 8 209      | RNA splicing, via transesterification reactions                                      |                  |                    |   |     |
| GO:0006364 | 2.70231486534987e-05                                                                 | 11.4965091299678 | 0.590132170784029  |   |     |
| 6 104      | rRNA processing                                                                      |                  |                    |   |     |
| GO:0016072 | 3.71277901418746e-05                                                                 | 10.8286943319838 | 0.62417825756003   |   |     |
| 6 110      | rRNA metabolic process                                                               |                  |                    |   |     |
| GO:0032259 | 9.85669348900182e-05                                                                 | 8.99621052631579 | 0.743339561276036  |   |     |
| 6 131      | methylation                                                                          |                  |                    |   |     |
| GO:0034470 | 0.000138461507791272                                                                 | 6.85540587219344 | 1.13486955920006   |   |     |
| 7 200      | ncRNA processing                                                                     |                  |                    |   |     |
| GO:0000377 | 0.000156517181096764                                                                 | 6.71431472081218 | 1.15756695038406   |   |     |
| 7 204      | RNA splicing, via transesterification reactions with bulged adenosine as nucleophile |                  |                    |   |     |
| GO:0000398 | 0.000156517181096764                                                                 | 6.71431472081218 | 1.15756695038406   |   |     |
| 7 204      | nuclear mRNA splicing, via spliceosome                                               |                  |                    |   |     |
| GO:0060789 | 0.000189440581023968                                                                 | 179.5875         | 0.0226973911840011 | 2 |     |
| 4          | hair follicle placode formation                                                      |                  |                    |   |     |
| GO:0043414 | 0.000551193127756544                                                                 | 8.1921618204804  | 0.669573039928033  | 5 |     |
| 118        | macromolecule methylation                                                            |                  |                    |   |     |
| GO:0033120 | 0.00065573595463257                                                                  | 71.82            | 0.0397204345720019 | 2 | 7   |
|            | positive regulation of RNA splicing                                                  |                  |                    |   |     |
| GO:0045292 | 0.00065573595463257                                                                  | 71.82            | 0.0397204345720019 | 2 | 7   |
|            | nuclear mRNA cis splicing, via spliceosome                                           |                  |                    |   |     |
| GO:0034660 | 0.00116037215425537                                                                  | 4.73079136690647 | 1.61718912186008   |   |     |
| 7 285      | ncRNA metabolic process                                                              |                  |                    |   |     |
| GO:0050685 | 0.0016922542545246                                                                   | 39.8888888888889 | 0.062417825756003  |   |     |
| 2 11       | positive regulation of mRNA processing                                               |                  |                    |   |     |
| GO:0060788 | 0.00318343603243353                                                                  | 27.6076923076923 | 0.0851152169400042 |   |     |
| 2 15       | ectodermal placode formation                                                         |                  |                    |   |     |
| GO:0071696 | 0.00318343603243353                                                                  | 27.6076923076923 | 0.0851152169400042 |   |     |
| 2 15       | ectodermal placode development                                                       |                  |                    |   |     |
| GO:0071697 | 0.00318343603243353                                                                  | 27.6076923076923 | 0.0851152169400042 |   |     |
| 2 15       | ectodermal placode morphogenesis                                                     |                  |                    |   |     |
| GO:0009749 | 0.00329993944260055                                                                  | 7.03402366863905 | 0.61282956196803   |   |     |
| 4 108      | response to glucose stimulus                                                         |                  |                    |   |     |
| GO:0042255 | 0.00362485571722543                                                                  | 25.6339285714286 | 0.0907895647360044 |   |     |
| 2 16       | ribosome assembly                                                                    |                  |                    |   |     |
| GO:0017038 | 0.00385904213214055                                                                  | 4.31793145654835 | 1.49802781814407   |   |     |
| 6 264      | protein import                                                                       |                  |                    |   |     |
| GO:0009746 | 0.00388106150564039                                                                  | 6.70900964478946 | 0.641201300948031  |   |     |
| 4 113      | response to hexose stimulus                                                          |                  |                    |   |     |
| GO:0034284 | 0.0041317453096702                                                                   | 6.58720258720259 | 0.652549996540032  |   |     |
| 4 115      | response to monosaccharide stimulus                                                  |                  |                    |   |     |
| GO:0043484 | 0.00413297682835745                                                                  | 10.0668073136428 | 0.323437824372016  |   |     |
| 3 57       | regulation of RNA splicing                                                           |                  |                    |   |     |
| GO:0045862 | 0.00434075830036303                                                                  | 9.88308400460299 | 0.329112172168016  |   |     |
| 3 58       | positive regulation of proteolysis                                                   |                  |                    |   |     |
| GO:0048285 | 0.0049975243521611                                                                   | 3.6011753902663  | 2.0995086845201    | 7 | 370 |
|            | organelle fission                                                                    |                  |                    |   |     |
| GO:0031365 | 0.00510878432960978                                                                  | 21.1058823529412 | 0.107812608124005  |   |     |
| 2 19       | N-terminal protein amino acid modification                                           |                  |                    |   |     |
| GO:0031648 | 0.00510878432960978                                                                  | 21.1058823529412 | 0.107812608124005  |   |     |
| 2 19       | protein destabilization                                                              |                  |                    |   |     |

Stable4\_20PerPair

|                                                                    |                                                                          |                  |                   |                    |                    |                     |       |       |
|--------------------------------------------------------------------|--------------------------------------------------------------------------|------------------|-------------------|--------------------|--------------------|---------------------|-------|-------|
| GO:0009743                                                         | 0.00671697810417207                                                      | 5.70552884615385 | 0.749013909072037 |                    |                    |                     |       |       |
| 4 132                                                              | response to carbohydrate stimulus                                        |                  |                   |                    |                    |                     |       |       |
| GO:0000083                                                         | 0.00682576729509103                                                      | 17.93625         | 0.124835651512006 | 2                  |                    |                     |       |       |
| 22                                                                 | regulation of transcription involved in G1/S phase of mitotic cell cycle |                  |                   |                    |                    |                     |       |       |
| GO:0007090                                                         | 0.00682576729509103                                                      | 17.93625         | 0.124835651512006 | 2                  |                    |                     |       |       |
| 22                                                                 | regulation of S phase of mitotic cell cycle                              |                  |                   |                    |                    |                     |       |       |
| GO:0030163                                                         | 0.00694191987368296                                                      | 3.08163605083523 | 2.80880215902014  |                    |                    |                     |       |       |
| 8 495                                                              | protein catabolic process                                                |                  |                   |                    |                    |                     |       |       |
| GO:0033157                                                         | 0.00823705393207931                                                      | 5.36689291101056 | 0.794408691440039 |                    |                    |                     |       |       |
| 4 140                                                              | regulation of intracellular protein transport                            |                  |                   |                    |                    |                     |       |       |
| GO:0030162                                                         | 0.00864950084488337                                                      | 5.28836863619472 | 0.805757387032039 |                    |                    |                     |       |       |
| 4 142                                                              | regulation of proteolysis                                                |                  |                   |                    |                    |                     |       |       |
| GO:0006479                                                         | 0.00952863464021312                                                      | 7.33578515224085 | 0.436924780292021 |                    |                    |                     |       |       |
| 3 77                                                               | protein methylation                                                      |                  |                   |                    |                    |                     |       |       |
| GO:0008213                                                         | 0.00952863464021312                                                      | 7.33578515224085 | 0.436924780292021 |                    |                    |                     |       |       |
| 3 77                                                               | protein alkylation                                                       |                  |                   |                    |                    |                     |       |       |
| Tissue: Thyroid=>whole_Blood Type: asymmetric                      |                                                                          |                  |                   |                    |                    |                     |       |       |
| SourceGene: KRTAP3-2(ENSG00000212900.1)                            |                                                                          |                  |                   |                    |                    |                     |       |       |
| TargetGeneSet: CELA2B CELA3A AMY2A SMCP CPB1 SPINK1 CLPS RP11 CPA2 |                                                                          |                  |                   |                    |                    |                     |       |       |
| CPA1                                                               | PRSS1                                                                    | PNLIP            | PNLIPRP2          | KRT6A              | KRT4               | GP2                 | CTRB2 | CTRB1 |
| KRT13                                                              |                                                                          |                  |                   |                    |                    |                     |       |       |
| GOBPID                                                             | Pvalue                                                                   | OddsRatio        | ExpCount          | Count              | Size               | Term                |       |       |
| GO:0007586                                                         | 5.69496585169008e-13                                                     |                  | 103.193519351935  |                    |                    | 0.14331188153069    |       |       |
| 8 109                                                              | digestion                                                                |                  |                   |                    |                    |                     |       |       |
| GO:0044241                                                         | 8.68065653198509e-07                                                     |                  | 225.3125          |                    | 0.0197218185592693 |                     |       | 3     |
| 15                                                                 | lipid digestion                                                          |                  |                   |                    |                    |                     |       |       |
| GO:0022617                                                         | 1.33863255514118e-05                                                     |                  | 81.8125           | 0.0473323645422462 |                    |                     | 3     | 36    |
| extracellular matrix disassembly                                   |                                                                          |                  |                   |                    |                    |                     |       |       |
| GO:0030198                                                         | 0.00115359192296497                                                      |                  | 16.939082278481   | 0.211680852536157  |                    |                     |       | 3     |
| 161                                                                | extracellular matrix organization                                        |                  |                   |                    |                    |                     |       |       |
| GO:0043062                                                         | 0.00117438184385728                                                      |                  | 16.8313679245283  |                    |                    | 0.212995640440108   |       |       |
| 3 162                                                              | extracellular structure organization                                     |                  |                   |                    |                    |                     |       |       |
| GO:0001523                                                         | 0.00117890899156601                                                      |                  | 45.7710651828299  |                    |                    | 0.0512767282541001  |       |       |
| 2 39                                                               | retinoid metabolic process                                               |                  |                   |                    |                    |                     |       |       |
| GO:0016101                                                         | 0.00130255347491052                                                      |                  | 43.4177978883861  |                    |                    | 0.0539063040620026  |       |       |
| 2 41                                                               | diterpenoid metabolic process                                            |                  |                   |                    |                    |                     |       |       |
| GO:0006721                                                         | 0.00193222176422744                                                      |                  | 35.2549019607843  |                    |                    | 0.0657393951975642  |       |       |
| 2 50                                                               | terpenoid metabolic process                                              |                  |                   |                    |                    |                     |       |       |
| GO:0016042                                                         | 0.0036858273964719                                                       |                  | 11.1346757322176  |                    |                    | 0.318178672756211   |       |       |
| 3 242                                                              | lipid catabolic process                                                  |                  |                   |                    |                    |                     |       |       |
| GO:0006720                                                         | 0.00396282855922372                                                      |                  | 24.1378151260504  |                    |                    | 0.0946647290844924  |       |       |
| 2 72                                                               | isoprenoid metabolic process                                             |                  |                   |                    |                    |                     |       |       |
| GO:0009791                                                         | 0.00451877459080465                                                      |                  | 22.5207843137255  |                    |                    | 0.101238668604249   |       |       |
| 2 77                                                               | post-embryonic development                                               |                  |                   |                    |                    |                     |       |       |
| GO:0008202                                                         | 0.00521715255170248                                                      |                  | 9.79773985239852  |                    |                    | 0.360251885682652   |       |       |
| 3 274                                                              | steroid metabolic process                                                |                  |                   |                    |                    |                     |       |       |
| GO:0071845                                                         | 0.00576367505250986                                                      |                  | 9.44239323843416  |                    |                    | 0.373399764722165   |       |       |
| 3 284                                                              | cellular component disassembly at cellular level                         |                  |                   |                    |                    |                     |       |       |
| GO:0022411                                                         | 0.00599161296939949                                                      |                  | 9.30723684210526  |                    |                    | 0.37865891633797    |       |       |
| 3 288                                                              | cellular component disassembly                                           |                  |                   |                    |                    |                     |       |       |
| GO:0007341                                                         | 0.00655758079782431                                                      |                  | 200.388888888889  |                    |                    | 0.00657393951975642 |       |       |
| 1 5                                                                | penetration of zona pellucida                                            |                  |                   |                    |                    |                     |       |       |
| GO:0044245                                                         | 0.00655758079782431                                                      |                  | 200.388888888889  |                    |                    | 0.00657393951975642 |       |       |
| 1 5                                                                | polysaccharide digestion                                                 |                  |                   |                    |                    |                     |       |       |
| GO:0000244                                                         | 0.00786419895958823                                                      |                  | 160.3             | 0.0078887274237077 |                    |                     | 1     | 6     |
| assembly of spliceosomal tri-snRNP                                 |                                                                          |                  |                   |                    |                    |                     |       |       |
| GO:0002385                                                         | 0.00786419895958823                                                      |                  | 160.3             | 0.0078887274237077 |                    |                     | 1     | 6     |
| mucosal immune response                                            |                                                                          |                  |                   |                    |                    |                     |       |       |
| GO:0019374                                                         | 0.00786419895958823                                                      |                  | 160.3             | 0.0078887274237077 |                    |                     | 1     | 6     |
| galactolipid metabolic process                                     |                                                                          |                  |                   |                    |                    |                     |       |       |
| GO:0045056                                                         | 0.00786419895958823                                                      |                  | 160.3             | 0.0078887274237077 |                    |                     | 1     | 6     |
| transcytosis                                                       |                                                                          |                  |                   |                    |                    |                     |       |       |
| Tissue: whole_Blood=>Thyroid Type: asymmetric                      |                                                                          |                  |                   |                    |                    |                     |       |       |

Stable4\_20PerPair

| SourceGene:    | NCAN(ENSG00000130287.5) |                      |                  |                  |         |                                               |           |         |        |      |
|----------------|-------------------------|----------------------|------------------|------------------|---------|-----------------------------------------------|-----------|---------|--------|------|
| TargetGeneSet: | NOC2L                   | RBP7                 | RP1              | NUDC             | NCDN    | LRRC41                                        | HIPK1     | C1orf61 |        |      |
| TROVE2         | CDC73                   | RP11                 | ACBD3            | URB2             | SMPD4   | GORASP2                                       | MOBP      | C3orf39 | TMF1   |      |
| GAP43          | TMEM39A                 | ZIC1                 | LETM1            | TBC1D1           | ANKRD17 | SEC24D                                        | ZBTB80SP1 |         | WDR36  |      |
| SAR1B          | SEC24A                  | CAMK2A               | CPLX2            | FAF2             | SNCB    | SSR1                                          | PPARD     | PGM3    | SF3B5  |      |
| EIF3B          | C7orf26                 | ABCF2                | SLC35G5          | NEIL2            | PRKDC   | STMN2                                         | UBQLN1    | SURF4   | SEC16A |      |
| SEC24C         | NOLC1                   | GBF1                 | SEC23IP          | TSSC4            | COPB1   | SLC1A2                                        | GANAB     | STIP1   | SYVN1  |      |
| SLC22A20       |                         | ARCN1                | RNF26            | LEPREL2          | CBX5    | KIF5A                                         | CAND1     | SART3   | GCN1L1 |      |
| ATP6V0A2       |                         | STON2                | RNF40            | DNAJA2           | EDC4    | PRDM7                                         | DPH1      | ARHGDI1 | FOXK2  |      |
| ST8SIA3        | AP3D1                   | ELAVL1               | P2RY11           | RAVER1           | ELAVL3  | USE1                                          | GATAD2A   | PSMC4   | SMG9   |      |
| GRWD1          | PRMT1                   | CNOT3                | FIZ1             | PEG3             | RPS18P1 | SNAP25                                        | SEC23B    | RIMS4   | RP4    | PRR5 |
| APEX2          | MAGEH1                  | RP13                 | HCFC1            |                  |         |                                               |           |         |        |      |
| GOBPID         | Pvalue                  | OddsRatio            | ExpCount         | Count            | Size    | Term                                          |           |         |        |      |
| GO:0048199     | 8                       | 2.75977668969244e-12 | 75.4947368421053 |                  |         | vesicle targeting, to, from or within Golgi   |           |         |        |      |
| GO:0006901     | 8                       | 2.81246575646194e-11 | 53.0962962962963 |                  |         | vesicle coating                               |           |         |        |      |
| GO:0006900     | 8                       | 4.56823424919053e-11 | 49.4275862068965 |                  |         | membrane budding                              |           |         |        |      |
| GO:0006903     | 8                       | 4.56823424919053e-11 | 49.4275862068965 |                  |         | vesicle targeting                             |           |         |        |      |
| GO:0051650     | 8                       | 4.22897738743914e-10 | 35.8075          | 0.29229811085738 |         | establishment of vesicle localization         | 8         |         | 48     |      |
| GO:0051648     | 8                       | 5.20139281349438e-09 | 25.0982456140351 |                  |         | vesicle localization                          |           |         |        |      |
| GO:0051656     | 9                       | 1.00269660814096e-08 | 17.6718492019813 |                  |         | establishment of organelle localization       |           |         |        |      |
| GO:0048207     | 5                       | 2.13662666113678e-08 | 86.4638554216867 |                  |         | vesicle targeting, rough ER to cis-Golgi      |           |         |        |      |
| GO:0048208     | 5                       | 2.13662666113678e-08 | 86.4638554216867 |                  |         | COPII vesicle coating                         |           |         |        |      |
| GO:0090114     | 5                       | 2.13662666113678e-08 | 86.4638554216867 |                  |         | COPII-coated vesicle budding                  |           |         |        |      |
| GO:0006888     | 7                       | 3.90193650725047e-08 | 25.7728909465021 |                  |         | ER to Golgi vesicle-mediated transport        |           |         |        |      |
| GO:0016050     | 8                       | 7.70335352135787e-08 | 17.2048192771084 |                  |         | vesicle organization                          |           |         |        |      |
| GO:0048193     | 9                       | 1.04763838398002e-07 | 11.031857031857  | 1.0656701958342  | 10      | Golgi vesicle transport                       | 10        |         | 175    |      |
| GO:0051640     | 9                       | 3.12625900674405e-07 | 11.4909776461083 |                  |         | organelle localization                        |           |         |        |      |
| GO:0018279     | 7                       | 9.60119573805604e-07 | 15.4291666666667 |                  |         | protein N-linked glycosylation via asparagine |           |         |        |      |
| GO:0018196     | 7                       | 1.03798281649526e-06 | 15.2376162170401 |                  |         | peptidyl-asparagine modification              |           |         |        |      |
| GO:0006487     | 7                       | 1.40452995019808e-06 | 14.5164851125635 |                  |         | protein N-linked glycosylation                |           |         |        |      |
| GO:0035964     | 3                       | 5.9714342159921e-05  | 50.6576470588235 |                  |         | COPI-coated vesicle budding                   |           |         |        |      |
| GO:0048194     | 3                       | 5.9714342159921e-05  | 50.6576470588235 |                  |         | Golgi vesicle budding                         |           |         |        |      |
| GO:0048200     | 3                       | 5.9714342159921e-05  | 50.6576470588235 |                  |         | Golgi transport vesicle coating               |           |         |        |      |
| GO:0048205     | 3                       | 5.9714342159921e-05  | 50.6576470588235 |                  |         | COPI coating of Golgi vesicle                 |           |         |        |      |
| GO:0016044     | 10                      | 9.99787248871515e-05 | 4.86206656938364 |                  |         | cellular membrane organization                |           |         |        |      |
| GO:0061024     | 10                      | 0.000106687222457645 | 4.82182244279019 |                  |         | membrane organization                         |           |         |        |      |
| GO:0043687     | 7                       | 0.00011634485631479  | 7.04718319852419 |                  |         | post-translational protein modification       |           |         |        |      |
| GO:0019882     | 6                       | 0.000326942268488207 | 7.12512529234881 |                  |         | antigen processing and presentation           |           |         |        |      |



Stable4\_20PerPair

|                                                                    |                      |                                                                        |                    |                   |
|--------------------------------------------------------------------|----------------------|------------------------------------------------------------------------|--------------------|-------------------|
| GO:0002474                                                         | 0.000340633540317546 | 9.14445014098949                                                       | 0.602864853643347  |                   |
| 5                                                                  | 99                   | antigen processing and presentation of peptide antigen via MHC class I |                    |                   |
| GO:0006890                                                         | 0.0004026008062532   | 24.1042016806723                                                       | 0.14614905542869   |                   |
| 3                                                                  | 24                   | retrograde vesicle-mediated transport, Golgi to ER                     |                    |                   |
| GO:0048002                                                         | 0.0005086228600119   | 8.34015674347877                                                       | 0.657670749429105  |                   |
| 5                                                                  | 108                  | antigen processing and presentation of peptide antigen                 |                    |                   |
| GO:0006486                                                         | 0.000861910155642113 | 4.97989417989418                                                       | 1.53456508200125   |                   |
| 7                                                                  | 252                  | protein glycosylation                                                  |                    |                   |
| GO:0043413                                                         | 0.000861910155642113 | 4.97989417989418                                                       | 1.53456508200125   |                   |
| 7                                                                  | 252                  | macromolecule glycosylation                                            |                    |                   |
| GO:0070085                                                         | 0.000923652236374787 | 4.91860812425329                                                       | 1.55283371392983   |                   |
| 7                                                                  | 255                  | glycosylation                                                          |                    |                   |
| GO:0071482                                                         | 0.000952519709758408 | 17.4450304259635                                                       | 0.194865407238253  |                   |
| 3                                                                  | 32                   | cellular response to light stimulus                                    |                    |                   |
| GO:0033523                                                         | 0.00128371324468993  | 47.6943521594684                                                       | 0.0548058957857588 |                   |
| 2                                                                  | 9                    | histone H2B ubiquitination                                             |                    |                   |
| GO:0007603                                                         | 0.0019457472888171   | 37.0904392764858                                                       | 0.0669849837381496 |                   |
| 2                                                                  | 11                   | phototransduction, visible light                                       |                    |                   |
| GO:0007030                                                         | 0.00196791157521203  | 13.3049535603715                                                       | 0.249671303024012  |                   |
| 3                                                                  | 41                   | Golgi organization                                                     |                    |                   |
| GO:0009101                                                         | 0.00247666349159052  | 4.10698198198198                                                       | 1.84513182478721   |                   |
| 7                                                                  | 303                  | glycoprotein biosynthetic process                                      |                    |                   |
| GO:0010390                                                         | 0.00526494139286236  | 20.8531976744186                                                       | 0.109611791571518  |                   |
| 2                                                                  | 18                   | histone monoubiquitination                                             |                    |                   |
| GO:0071478                                                         | 0.00528826764857013  | 9.18160427807487                                                       | 0.353193550619334  |                   |
| 3                                                                  | 58                   | cellular response to radiation                                         |                    |                   |
| GO:0009100                                                         | 0.00554123245301087  | 3.52185615848407                                                       | 2.13742993564459   |                   |
| 7                                                                  | 351                  | glycoprotein metabolic process                                         |                    |                   |
| GO:0031648                                                         | 0.00586116541092958  | 19.625170998632                                                        | 0.115701335547713  | 2                 |
| 19                                                                 |                      | protein destabilization                                                |                    |                   |
| GO:0009584                                                         | 0.00648676271591792  | 18.5335917312661                                                       | 0.121790879523908  |                   |
| 2                                                                  | 20                   | detection of visible light                                             |                    |                   |
| GO:1901137                                                         | 0.00754088878676143  | 3.3142567224759                                                        | 2.2653103591447    | 7 372             |
|                                                                    |                      | carbohydrate derivative biosynthetic process                           |                    |                   |
| Tissue: Thyroid=>Whole_Blood Type: asymmetric                      |                      |                                                                        |                    |                   |
| SourceGene: OLIG1(ENSG00000184221.8)                               |                      |                                                                        |                    |                   |
| TargetGeneSet: BCAN ATP1A4 CNTN2 KIF1A MOBP IMPG2 SOX2-OT SORCS2   |                      |                                                                        |                    |                   |
| CTNND2 TMEM130 PTPRZ1 OR2A9P STMN2 NTRK2 OLFM1 GRIN1 SLC01A2 FAIM2 |                      |                                                                        |                    |                   |
| PPM1H CLIC1P1 FAM123A CYP46A1 C16orf13 MT3 AQP4 TUBB4A MAG         |                      |                                                                        |                    |                   |
| LRRC4B SHANK1 RP11 BCAS1 GPM6B PLP1                                |                      |                                                                        |                    |                   |
| GOBPID                                                             | Pvalue               | OddsRatio                                                              | ExpCount           | Count Size Term   |
| GO:0007612                                                         | 2.42177573625753e-07 | 46.8101761252446                                                       |                    | 0.140336308905958 |
| 5                                                                  | 78                   | learning                                                               |                    |                   |
| GO:0007611                                                         | 4.5936283323766e-06  | 25.015756302521                                                        | 0.253684866099232  | 5                 |
| 141                                                                |                      | learning or memory                                                     |                    |                   |
| GO:0050890                                                         | 7.0705225750299e-06  | 22.8124001278364                                                       | 0.277074250916892  |                   |
| 5                                                                  | 154                  | cognition                                                              |                    |                   |
| GO:0010975                                                         | 1.86149100770493e-05 | 18.5297944314338                                                       | 0.338246488132309  |                   |
| 5                                                                  | 188                  | regulation of neuron projection development                            |                    |                   |
| GO:0050770                                                         | 2.44408904771926e-05 | 28.3260869565217                                                       | 0.172721610961179  |                   |
| 4                                                                  | 96                   | regulation of axonogenesis                                             |                    |                   |
| GO:0031344                                                         | 4.89526522222706e-05 | 15.026455026455                                                        | 0.413812192927825  | 5                 |
| 230                                                                |                      | regulation of cell projection organization                             |                    |                   |
| GO:0051960                                                         | 5.56979163054521e-05 | 10.9111398963731                                                       | 0.705279911424815  |                   |
| 6                                                                  | 392                  | regulation of nervous system development                               |                    |                   |
| GO:0045664                                                         | 0.000153540336941953 | 11.6873346560847                                                       | 0.527160750121099  |                   |
| 5                                                                  | 293                  | regulation of neuron differentiation                                   |                    |                   |
| GO:0021782                                                         | 0.000157213624916511 | 33.4681677018634                                                       | 0.106151823403225  |                   |
| 3                                                                  | 59                   | glial cell development                                                 |                    |                   |
| GO:0006707                                                         | 0.000169504482655436 | 133.481481481481                                                       | 0.0197910179226351 |                   |
| 2                                                                  | 11                   | cholesterol catabolic process                                          |                    |                   |
| GO:0016127                                                         | 0.000169504482655436 | 133.481481481481                                                       | 0.0197910179226351 |                   |

Stable4\_20PerPair

|            |     |                                                                   |                  |                    |                    |
|------------|-----|-------------------------------------------------------------------|------------------|--------------------|--------------------|
| 2          | 11  | sterol catabolic process                                          |                  |                    |                    |
| GO:0022010 |     | 0.000169504482655436                                              | 133.481481481481 |                    | 0.0197910179226351 |
| 2          | 11  | central nervous system myelination                                |                  |                    |                    |
| GO:0032291 |     | 0.000169504482655436                                              | 133.481481481481 |                    | 0.0197910179226351 |
| 2          | 11  | axon ensheathment in central nervous system                       |                  |                    |                    |
| GO:2000463 |     | 0.000169504482655436                                              | 133.481481481481 |                    | 0.0197910179226351 |
| 2          | 11  | positive regulation of excitatory postsynaptic membrane potential |                  |                    |                    |
| GO:0010769 |     | 0.000215767505636689                                              | 15.810421286031  | 0.302262819182064  | 4                  |
| 168        |     | regulation of cell morphogenesis involved in differentiation      |                  |                    |                    |
| GO:0031345 |     | 0.000229468490445889                                              | 29.2683423913043 |                    | 0.120545290983323  |
| 3          | 67  | negative regulation of cell projection organization               |                  |                    |                    |
| GO:0050804 |     | 0.000241400759633476                                              | 15.3372781065089 |                    | 0.311258736419625  |
| 4          | 173 | regulation of synaptic transmission                               |                  |                    |                    |
| GO:0051969 |     | 0.000324821799205402                                              | 14.1500248385494 |                    | 0.336447304684797  |
| 4          | 187 | regulation of transmission of nerve impulse                       |                  |                    |                    |
| GO:0045838 |     | 0.000367786810607516                                              | 85.7797619047619 |                    | 0.0287869351601965 |
| 2          | 16  | positive regulation of membrane potential                         |                  |                    |                    |
| GO:0050767 |     | 0.000378772103909581                                              | 9.54687288020621 |                    | 0.640509307314373  |
| 5          | 356 | regulation of neurogenesis                                        |                  |                    |                    |
| GO:0048167 |     | 0.000401922738021126                                              | 23.9916387959866 |                    | 0.145733859248495  |
| 3          | 81  | regulation of synaptic plasticity                                 |                  |                    |                    |
| GO:0031644 |     | 0.000411323128239673                                              | 13.2680652680653 |                    | 0.358037506054944  |
| 4          | 199 | regulation of neurological system process                         |                  |                    |                    |
| GO:0042391 |     | 0.000522441754386378                                              | 12.4274475524476 |                    | 0.381426890872604  |
| 4          | 212 | regulation of membrane potential                                  |                  |                    |                    |
| GO:0006706 |     | 0.000769435401192477                                              | 57.1587301587302 |                    | 0.0413812192927825 |
| 2          | 23  | steroid catabolic process                                         |                  |                    |                    |
| GO:0021953 |     | 0.000882121917511441                                              | 18.1367665681722 |                    | 0.190713445436302  |
| 3          | 106 | central nervous system neuron differentiation                     |                  |                    |                    |
| GO:0060284 |     | 0.00102179355141063                                               | 7.6032833224614  | 0.797038267247941  | 5                  |
| 443        |     | regulation of cell development                                    |                  |                    |                    |
| GO:0014003 |     | 0.0011432530838012                                                | 46.150641025641  | 0.0503771365303439 | 2                  |
| 28         |     | oligodendrocyte development                                       |                  |                    |                    |
| GO:0007610 |     | 0.00128095959583095                                               | 7.21206486933168 |                    | 0.838419486540724  |
| 5          | 466 | behavior                                                          |                  |                    |                    |
| GO:0010001 |     | 0.00138795476634237                                               | 15.4193316564858 |                    | 0.223098747491523  |
| 3          | 124 | glial cell differentiation                                        |                  |                    |                    |
| GO:0022604 |     | 0.00143497775342852                                               | 9.39017916390179 |                    | 0.500172998408415  |
| 4          | 278 | regulation of cell morphogenesis                                  |                  |                    |                    |
| GO:0043523 |     | 0.00145330451763101                                               | 15.1664899257688 |                    | 0.226697114386548  |
| 3          | 126 | regulation of neuron apoptotic process                            |                  |                    |                    |
| GO:1901214 |     | 0.00145330451763101                                               | 15.1664899257688 |                    | 0.226697114386548  |
| 3          | 126 | regulation of neuron death                                        |                  |                    |                    |
| GO:0007409 |     | 0.00165913525184291                                               | 6.78547083455059 |                    | 0.888796623071068  |
| 5          | 494 | axonogenesis                                                      |                  |                    |                    |
| GO:0060079 |     | 0.00178569731497192                                               | 36.3434343434343 |                    | 0.0629714206629299 |
| 2          | 35  | regulation of excitatory postsynaptic membrane potential          |                  |                    |                    |
| GO:0051129 |     | 0.00185168168737784                                               | 8.73902288188003 |                    | 0.53615666735866   |
| 4          | 298 | negative regulation of cellular component organization            |                  |                    |                    |
| GO:0051402 |     | 0.00188620277565234                                               | 13.8067632850242 |                    | 0.248287315756695  |
| 3          | 138 | neuron apoptotic process                                          |                  |                    |                    |
| GO:0050771 |     | 0.00188865069289165                                               | 35.2720588235294 |                    | 0.0647706041104422 |
| 2          | 36  | negative regulation of axonogenesis                               |                  |                    |                    |
| GO:0044087 |     | 0.00196773891443697                                               | 8.58984493767102 |                    | 0.545152584596222  |
| 4          | 303 | regulation of cellular component biogenesis                       |                  |                    |                    |
| GO:0070997 |     | 0.00204652761729825                                               | 13.4056928370347 |                    | 0.255484049546744  |
| 3          | 142 | neuron death                                                      |                  |                    |                    |
| GO:0042063 |     | 0.00217219112194648                                               | 13.1197183098592 |                    | 0.260881599889281  |
| 3          | 145 | gliogenesis                                                       |                  |                    |                    |
| GO:0048708 |     | 0.00221406413008979                                               | 32.4054054054054 |                    | 0.070168154452979  |
| 2          | 39  | astrocyte differentiation                                         |                  |                    |                    |
| GO:0021537 |     | 0.00225858286693251                                               | 12.9356884057971 |                    | 0.264479966784306  |
| 3          | 147 | telencephalon development                                         |                  |                    |                    |

Stable4\_20PerPair

|            |                     |                                                                                            |                     |   |                     |
|------------|---------------------|--------------------------------------------------------------------------------------------|---------------------|---|---------------------|
| GO:0048168 | 0.00232802143443588 | 31.5504385964912                                                                           |                     |   | 0.0719673379004913  |
| 2          | 40                  | regulation of neuronal synaptic plasticity                                                 |                     |   |                     |
| GO:0060078 | 0.00232802143443588 | 31.5504385964912                                                                           |                     |   | 0.0719673379004913  |
| 2          | 40                  | regulation of postsynaptic membrane potential                                              |                     |   |                     |
| GO:0021954 | 0.00268621970631436 | 29.2357723577236                                                                           |                     |   | 0.0773648882430282  |
| 2          | 43                  | central nervous system neuron development                                                  |                     |   |                     |
| GO:0008206 | 0.00281102994566741 | 28.5376984126984                                                                           |                     |   | 0.0791640716905404  |
| 2          | 44                  | bile acid metabolic process                                                                |                     |   |                     |
| GO:0008306 | 0.00293852999747532 | 27.8720930232558                                                                           |                     |   | 0.0809632551380527  |
| 2          | 45                  | associative learning                                                                       |                     |   |                     |
| GO:0007215 | 0.00320156226858409 | 26.6296296296296                                                                           |                     |   | 0.0845616220330773  |
| 2          | 47                  | glutamate receptor signaling pathway                                                       |                     |   |                     |
| GO:0010976 | 0.0037594958556273  | 24.4489795918367                                                                           |                     |   | 0.0917583558231264  |
| 2          | 51                  | positive regulation of neuron projection development                                       |                     |   |                     |
| GO:0048709 | 0.00405424962355107 | 23.4869281045752                                                                           |                     |   | 0.095356722718151   |
| 2          | 53                  | oligodendrocyte differentiation                                                            |                     |   |                     |
| GO:0007017 | 0.00501252730018951 | 6.56041131105398                                                                           |                     |   | 0.707079094872327   |
| 4          | 393                 | microtubule-based process                                                                  |                     |   |                     |
| GO:0031117 | 0.00538821719050797 | 288.46                                                                                     | 0.00539755034253685 | 1 | 3                   |
|            |                     | positive regulation of microtubule depolymerization                                        |                     |   |                     |
| GO:0031133 | 0.00538821719050797 | 288.46                                                                                     | 0.00539755034253685 | 1 | 3                   |
|            |                     | regulation of axon diameter                                                                |                     |   |                     |
| GO:0036003 | 0.00538821719050797 | 288.46                                                                                     | 0.00539755034253685 | 1 | 3                   |
|            |                     | positive regulation of transcription from RNA polymerase II promoter in response to stress |                     |   |                     |
| GO:0045163 | 0.00538821719050797 | 288.46                                                                                     | 0.00539755034253685 | 1 | 3                   |
|            |                     | clustering of voltage-gated potassium channels                                             |                     |   |                     |
| GO:0050893 | 0.00538821719050797 | 288.46                                                                                     | 0.00539755034253685 | 1 | 3                   |
|            |                     | sensory processing                                                                         |                     |   |                     |
| GO:0051581 | 0.00538821719050797 | 288.46                                                                                     | 0.00539755034253685 | 1 | 3                   |
|            |                     | negative regulation of neurotransmitter uptake                                             |                     |   |                     |
| GO:0051611 | 0.00538821719050797 | 288.46                                                                                     | 0.00539755034253685 | 1 | 3                   |
|            |                     | regulation of serotonin uptake                                                             |                     |   |                     |
| GO:0051612 | 0.00538821719050797 | 288.46                                                                                     | 0.00539755034253685 | 1 | 3                   |
|            |                     | negative regulation of serotonin uptake                                                    |                     |   |                     |
| GO:0071205 | 0.00538821719050797 | 288.46                                                                                     | 0.00539755034253685 | 1 | 3                   |
|            |                     | protein localization to juxtaparanode region of axon                                       |                     |   |                     |
| GO:2000009 | 0.00538821719050797 | 288.46                                                                                     | 0.00539755034253685 | 1 | 3                   |
|            |                     | negative regulation of protein localization to cell surface                                |                     |   |                     |
| GO:0044057 | 0.00617586384696138 | 6.16861104996698                                                                           |                     |   | 0.750259497612622   |
| 4          | 417                 | regulation of system process                                                               |                     |   |                     |
| GO:0042552 | 0.00659225990226509 | 18.1300505050505                                                                           |                     |   | 0.122344474430835   |
| 2          | 68                  | myelination                                                                                |                     |   |                     |
| GO:0032536 | 0.00717807781848756 | 192.2933333333333                                                                          |                     |   | 0.00719673379004913 |
| 1          | 4                   | regulation of cell projection size                                                         |                     |   |                     |
| GO:0042759 | 0.00717807781848756 | 192.2933333333333                                                                          |                     |   | 0.00719673379004913 |
| 1          | 4                   | long-chain fatty acid biosynthetic process                                                 |                     |   |                     |
| GO:0051610 | 0.00717807781848756 | 192.2933333333333                                                                          |                     |   | 0.00719673379004913 |
| 1          | 4                   | serotonin uptake                                                                           |                     |   |                     |
| GO:0072592 | 0.00717807781848756 | 192.2933333333333                                                                          |                     |   | 0.00719673379004913 |
| 1          | 4                   | oxygen metabolic process                                                                   |                     |   |                     |
| GO:0007272 | 0.00736424552645795 | 17.0892857142857                                                                           |                     |   | 0.129541208220884   |
| 2          | 72                  | ensheathment of neurons                                                                    |                     |   |                     |
| GO:0008366 | 0.00736424552645795 | 17.0892857142857                                                                           |                     |   | 0.129541208220884   |
| 2          | 72                  | axon ensheathment                                                                          |                     |   |                     |
| GO:0051899 | 0.00756335669081938 | 16.8474178403756                                                                           |                     |   | 0.131340391668397   |
| 2          | 73                  | membrane depolarization                                                                    |                     |   |                     |
| GO:0051494 | 0.00776489631219968 | 16.6122685185185                                                                           |                     |   | 0.133139575115909   |
| 2          | 74                  | negative regulation of cytoskeleton organization                                           |                     |   |                     |
| GO:0007420 | 0.00793004676512219 | 5.72522522522523                                                                           |                     |   | 0.806034184485503   |
| 4          | 448                 | brain development                                                                          |                     |   |                     |
| GO:0001764 | 0.00838399916751115 | 15.9444444444444                                                                           |                     |   | 0.138537125458446   |
| 2          | 77                  | neuron migration                                                                           |                     |   |                     |

Stable4\_20PerPair

|                              |                                                                      |                            |                        |
|------------------------------|----------------------------------------------------------------------|----------------------------|------------------------|
| GO:0097285                   | 0.00847345213804796                                                  | 7.94476581451763           | 0.424607293612899      |
| 3 236                        | cell-type specific apoptotic process                                 |                            |                        |
| GO:0001973                   | 0.00896484115874663                                                  | 144.21 0.00899591723756141 | 1 5                    |
|                              | adenosine receptor signaling pathway                                 |                            |                        |
| GO:0021826                   | 0.00896484115874663                                                  | 144.21 0.00899591723756141 | 1 5                    |
|                              | substrate-independent telencephalic tangential migration             |                            |                        |
| GO:0021830                   | 0.00896484115874663                                                  | 144.21 0.00899591723756141 | 1 5                    |
|                              | interneuron migration from the subpallium to the cortex              |                            |                        |
| GO:0021843                   | 0.00896484115874663                                                  | 144.21 0.00899591723756141 | 1 5                    |
|                              | substrate-independent telencephalic tangential interneuron migration |                            |                        |
| GO:0021853                   | 0.00896484115874663                                                  | 144.21 0.00899591723756141 | 1 5                    |
|                              | cerebral cortex GABAergic interneuron migration                      |                            |                        |
| GO:0021894                   | 0.00896484115874663                                                  | 144.21 0.00899591723756141 | 1 5                    |
|                              | cerebral cortex GABAergic interneuron development                    |                            |                        |
| GO:0031115                   | 0.00896484115874663                                                  | 144.21 0.00899591723756141 | 1 5                    |
|                              | negative regulation of microtubule polymerization                    |                            |                        |
| GO:0033210                   | 0.00896484115874663                                                  | 144.21 0.00899591723756141 | 1 5                    |
|                              | leptin-mediated signaling pathway                                    |                            |                        |
| GO:0035418                   | 0.00896484115874663                                                  | 144.21 0.00899591723756141 | 1 5                    |
|                              | protein localization to synapse                                      |                            |                        |
| GO:0071625                   | 0.00896484115874663                                                  | 144.21 0.00899591723756141 | 1 5                    |
|                              | vocalization behavior                                                |                            |                        |
| GO:0043524                   | 0.00924294353506946                                                  | 15.1329113924051           | 0.145733859248495      |
| 2 81                         | negative regulation of neuron apoptotic process                      |                            |                        |
| GO:0050768                   | 0.00924294353506946                                                  | 15.1329113924051           | 0.145733859248495      |
| 2 81                         | negative regulation of neurogenesis                                  |                            |                        |
| GO:1901215                   | 0.00924294353506946                                                  | 15.1329113924051           | 0.145733859248495      |
| 2 81                         | negative regulation of neuron death                                  |                            |                        |
| GO:0030900                   | 0.00959389310905019                                                  | 7.58071988595866           | 0.444398311535534      |
| 3 247                        | forebrain development                                                |                            |                        |
| GO:0051493                   | 0.00969985652383275                                                  | 7.54924578527063           | 0.446197494983046      |
| 3 248                        | regulation of cytoskeleton organization                              |                            |                        |
| GO:0019228                   | 0.00991195731059808                                                  | 14.5762195121951           | 0.151131409591032      |
| 2 84                         | regulation of action potential in neuron                             |                            |                        |
| Tissue: whole_Blood=>Thyroid | Type: cluster                                                        |                            |                        |
| SourceGene:                  | RP11-476C8.3(ENSG00000250163.1)                                      |                            |                        |
| TargetGeneSet:               | FNDC5 RP11 GPSM2 HMGB1P11 SIX2 IGKJ5 IGKC                            |                            |                        |
| IGKJ2 IGKV4-1                | IGKV5-2 IGKV3-15                                                     | IGKV3-20                   | SIX2 IGKJ5 IGKC        |
| IGKV2D-24                    | MFSD6 SERPINE2                                                       | CCR4 BCHE TXK              | IGKV2-24 IGKV2-29      |
| ANXA10 NNT                   | PPP2R2A PNOC POLR2K                                                  | PIP4K2A RPS24              | ROBO3 APAF1 SPIC       |
| IGHA2 IGHA1                  | IGHV3-13                                                             | IGHV1-46                   | IGHV1-69 IGHV3-73      |
| LINC00324                    | PIEZO2 PNMAL2                                                        | DPM1 IGLV7-43              | IGLV2-11 IGLL5         |
| IGLC1 IGLC3                  | RN5-8S6                                                              |                            |                        |
| GOBPID Pvalue                | OddsRatio                                                            | ExpCount                   | Count Size Term        |
| GO:0006958                   | 7.01309979723971e-10                                                 | 81.6875                    | 0.103799045048786 6 50 |
|                              | complement activation, classical pathway                             |                            |                        |
| GO:0006956                   | 2.94353652635558e-09                                                 | 63                         | 0.13078679676147 6 63  |
|                              | complement activation                                                |                            |                        |
| GO:0002455                   | 3.56814685279044e-09                                                 | 60.8559322033898           | 0.134938758563421      |
| 6 65                         | humoral immune response mediated by circulating immunoglobulin       |                            |                        |
| GO:0072376                   | 1.47636597233999e-08                                                 | 47.1875                    | 0.170230433880008 6 82 |
|                              | protein activation cascade                                           |                            |                        |
| GO:0016064                   | 9.15904609930835e-08                                                 | 34.0857142857143           | 0.230433880008304      |
| 6 111                        | immunoglobulin mediated immune response                              |                            |                        |
| GO:0019724                   | 1.07417590743408e-07                                                 | 33.1319444444444           | 0.236661822711231      |
| 6 114                        | B cell mediated immunity                                             |                            |                        |
| GO:0002250                   | 1.27080174854711e-07                                                 | 22.6747097655361           | 0.411044218393191      |
| 7 198                        | adaptive immune response                                             |                            |                        |
| GO:0006959                   | 1.60955212150291e-07                                                 | 30.8297413793103           | 0.253269669919037      |
| 6 122                        | humoral immune response                                              |                            |                        |
| GO:0002449                   | 1.02719060191915e-06                                                 | 22.1428571428571           | 0.346688810462944      |
| 6 167                        | lymphocyte mediated immunity                                         |                            |                        |
| GO:0002460                   | 1.64360542847173e-06                                                 | 20.3514285714286           | 0.375752543076604      |

Stable4\_20PerPair

|            |     |                                                                                                                           |                                  |                  |                   |          |          |                     |        |         |          |      |
|------------|-----|---------------------------------------------------------------------------------------------------------------------------|----------------------------------|------------------|-------------------|----------|----------|---------------------|--------|---------|----------|------|
| 6          | 181 | adaptive immune response based on somatic recombination of immune receptors built from immunoglobulin superfamily domains |                                  |                  |                   |          |          |                     |        |         |          |      |
| GO:0002253 |     |                                                                                                                           | 2.0475684111775e-06              | 14.7264740917213 |                   |          |          | 0.620718289391738   |        |         |          |      |
| 7          | 299 | activation of immune response                                                                                             |                                  |                  |                   |          |          |                     |        |         |          |      |
| GO:0002443 |     |                                                                                                                           | 3.99911101796174e-06             | 17.3365853658537 |                   |          |          | 0.438031970105875   |        |         |          |      |
| 6          | 211 | leukocyte mediated immunity                                                                                               |                                  |                  |                   |          |          |                     |        |         |          |      |
| GO:0050778 |     |                                                                                                                           | 7.49754686067186e-06             | 11.9897698209719 |                   |          |          | 0.755657047955159   |        |         |          |      |
| 7          | 364 | positive regulation of immune response                                                                                    |                                  |                  |                   |          |          |                     |        |         |          |      |
| GO:0002252 |     |                                                                                                                           | 0.000120432446390825             | 9.2375           | 0.801328627776625 |          | 6        |                     | 386    |         |          |      |
|            |     | immune effector process                                                                                                   |                                  |                  |                   |          |          |                     |        |         |          |      |
| GO:0090331 |     |                                                                                                                           | 0.00621545179129268              | 248.603448275862 |                   |          |          | 0.00622794270292713 |        |         |          |      |
| 1          | 3   | negative regulation of platelet aggregation                                                                               |                                  |                  |                   |          |          |                     |        |         |          |      |
| GO:0010757 |     |                                                                                                                           | 0.00827895791298872              | 165.724137931034 |                   |          |          | 0.00830392360390284 |        |         |          |      |
| 1          | 4   | negative regulation of plasminogen activation                                                                             |                                  |                  |                   |          |          |                     |        |         |          |      |
| GO:0035268 |     |                                                                                                                           | 0.00827895791298872              | 165.724137931034 |                   |          |          | 0.00830392360390284 |        |         |          |      |
| 1          | 4   | protein mannosylation                                                                                                     |                                  |                  |                   |          |          |                     |        |         |          |      |
| GO:0035269 |     |                                                                                                                           | 0.00827895791298872              | 165.724137931034 |                   |          |          | 0.00830392360390284 |        |         |          |      |
| 1          | 4   | protein O-linked mannosylation                                                                                            |                                  |                  |                   |          |          |                     |        |         |          |      |
| GO:0060332 |     |                                                                                                                           | 0.00827895791298872              | 165.724137931034 |                   |          |          | 0.00830392360390284 |        |         |          |      |
| 1          | 4   | positive regulation of response to interferon-gamma                                                                       |                                  |                  |                   |          |          |                     |        |         |          |      |
| GO:0060335 |     |                                                                                                                           | 0.00827895791298872              | 165.724137931034 |                   |          |          | 0.00830392360390284 |        |         |          |      |
| 1          | 4   | positive regulation of interferon-gamma-mediated signaling pathway                                                        |                                  |                  |                   |          |          |                     |        |         |          |      |
|            |     | Tissue: whole_Blood=>Thyroid                                                                                              |                                  |                  |                   |          |          |                     |        |         |          |      |
|            |     | Type: cluster                                                                                                             |                                  |                  |                   |          |          |                     |        |         |          |      |
|            |     | SourceGene:                                                                                                               | RP11-890B15.3(ENSG00000255455.1) |                  |                   |          |          |                     |        |         |          |      |
|            |     | TargetGeneSet:                                                                                                            | CEP104                           | RP4              | DFFA              | MED18    | MFI2     | AKIRIN1             | MOB3C  | ZFYVE9  | USP1     |      |
|            |     | ITGB3BP                                                                                                                   | U6                               | ZNF644           | AMIGO1            | HIPK1    | DENND4B  | UBQLN4              | SMG5   | RRNAD1  | B4GALT3  | POGK |
|            |     | GS1                                                                                                                       | CDC73                            | RP11             | SLC5A6            | MSH6     | AMMECR1L | NDUFA10             | CMC1   | PRKAR2A | NEK4     |      |
|            |     | SLC25A36                                                                                                                  |                                  | MYNN             | SENP2             | CEP19    | CCDC149  | MTRR                | ZFR    | NIPBL   | SEC24A   |      |
|            |     | FBXW11                                                                                                                    | C5orf25                          | SRPK1            | BRPF3             | TAF8     | RPL7L1   | RARS2               | FBXO5  | C7orf26 | PURB     |      |
|            |     | TRIM56                                                                                                                    | CUL1                             | ZNF398           | ABCF2             | POLR3D   | CHMP7    | KAT6A               | CTD    | COX6C   | DNAJA1   | RGP1 |
|            |     | BICD2                                                                                                                     | NUP188                           | METTL11A         |                   | TOR1B    | FBXO18   | TAF3                | PHRF1  | NUP98   | BDNF-AS1 |      |
|            |     | ETFPA                                                                                                                     | MARK2                            | STIP1            | TEX12             | PAFAH1B2 |          | SETP16              | CBL    | HYLS1   | TMEM198B |      |
|            |     | RNF41                                                                                                                     | GCN1L1                           | RP13             | MPHOSPH8          |          | RANP8    | PDS5B               | NIPA2  | HERC2   | PLEKH02  |      |
|            |     | GOLGA6L5                                                                                                                  |                                  | ZNF592           | SEC14L5           | TBC1D10B |          | SRCAP               | SETD1A | DNAJA2  | NFATC3   | TAT  |
|            |     | GAN                                                                                                                       | VPS53                            | ALKBH5           | LEPREL4           | STAT5B   | RUNDC1   | NMT1                | PPM1D  | METTL2A | FOXK2    |      |
|            |     | ZBTB7A                                                                                                                    | FEM1A                            | ELAVL1           | ZNF441            | ZNF791   | BRD4     | U2AF2               | ZNF264 | ZNF587  | ZSCAN22  |      |
|            |     | TRIM28                                                                                                                    | RP5-1187M17.10                   | PHF20            | TP53RK            | GNAS-AS1 |          | C22orf29            |        |         | KRT18P5  | CRKL |
|            |     | PPARA                                                                                                                     | DDX3X                            | SMC1A            | MED12             | RGAG4    | MID2     | CUL4B               | XIAP   |         |          |      |
|            |     | GOBPID                                                                                                                    | Pvalue                           | OddsRatio        | ExpCount          | Count    | Count    | Term                | Size   | Term    |          |      |
| GO:0007064 |     |                                                                                                                           | 4.94507727089692e-05             | 56.03125         |                   |          |          | 0.0753581067054183  |        |         | 3        |      |
| 11         |     | mitotic sister chromatid cohesion                                                                                         |                                  |                  |                   |          |          |                     |        |         |          |      |
| GO:0007059 |     |                                                                                                                           | 0.000397550402121733             | 6.84545016851228 |                   |          |          | 0.959103176250778   |        |         |          |      |
| 6          | 140 | chromosome segregation                                                                                                    |                                  |                  |                   |          |          |                     |        |         |          |      |
| GO:0016570 |     |                                                                                                                           | 0.000422029338857773             | 4.8991008991009  | 1.78804235001038  |          |          |                     |        |         | 8        |      |
| 261        |     | histone modification                                                                                                      |                                  |                  |                   |          |          |                     |        |         |          |      |
| GO:0043543 |     |                                                                                                                           | 0.000461953799762098             | 6.64516129032258 |                   |          |          | 0.986506124143658   |        |         |          |      |
| 6          | 144 | protein acylation                                                                                                         |                                  |                  |                   |          |          |                     |        |         |          |      |
| GO:0016569 |     |                                                                                                                           | 0.000490697853596793             | 4.7835716407145  | 1.8291467718497   | 8        |          |                     |        |         | 267      |      |
|            |     | covalent chromatin modification                                                                                           |                                  |                  |                   |          |          |                     |        |         |          |      |
| GO:0016573 |     |                                                                                                                           | 0.000870290617365219             | 7.35850030985334 |                   |          |          | 0.739879593107743   |        |         |          |      |
| 5          | 108 | histone acetylation                                                                                                       |                                  |                  |                   |          |          |                     |        |         |          |      |
| GO:0018393 |     |                                                                                                                           | 0.000945346314671262             | 7.21732522796353 |                   |          |          | 0.753581067054183   |        |         |          |      |
| 5          | 110 | internal peptidyl-lysine acetylation                                                                                      |                                  |                  |                   |          |          |                     |        |         |          |      |
| GO:0018394 |     |                                                                                                                           | 0.00106682760768211              | 7.01536643026005 |                   |          |          | 0.774133277973843   |        |         |          |      |
| 5          | 113 | peptidyl-lysine acetylation                                                                                               |                                  |                  |                   |          |          |                     |        |         |          |      |
| GO:0006475 |     |                                                                                                                           | 0.00115401297137377              | 6.88684719535783 |                   |          |          | 0.787834751920282   |        |         |          |      |
| 5          | 115 | internal protein amino acid acetylation                                                                                   |                                  |                  |                   |          |          |                     |        |         |          |      |
| GO:0007062 |     |                                                                                                                           | 0.00133918451408605              | 15.4342672413793 |                   |          |          | 0.219223583143035   |        |         |          |      |
| 3          | 32  | sister chromatid cohesion                                                                                                 |                                  |                  |                   |          |          |                     |        |         |          |      |
| GO:0006473 |     |                                                                                                                           | 0.0018552255678164               | 6.15334717176959 |                   |          |          | 0.87689433257214    |        |         |          |      |
| 5          | 128 | protein acetylation                                                                                                       |                                  |                  |                   |          |          |                     |        |         |          |      |
| GO:0032968 |     |                                                                                                                           | 0.00201721214730941              | 36.9690721649485 |                   |          |          | 0.0685073697321985  |        |         |          |      |
| 2          | 10  | positive regulation of transcription elongation from RNA polymerase                                                       |                                  |                  |                   |          |          |                     |        |         |          |      |

STable4\_20PerPair

|                                      |                           |                                                                         |                    |                    |     |       |         |
|--------------------------------------|---------------------------|-------------------------------------------------------------------------|--------------------|--------------------|-----|-------|---------|
| II promoter                          |                           |                                                                         |                    |                    |     |       |         |
| GO:0016568                           | 0.00230075228150553       | 3.40048780487805                                                        |                    | 2.87045879177912   |     |       |         |
| 9                                    | 419                       | chromatin modification                                                  |                    |                    |     |       |         |
| GO:0001833                           | 0.00245449245277618       | 32.8591065292096                                                        |                    | 0.0753581067054183 |     |       |         |
| 2                                    | 11                        | inner cell mass cell proliferation                                      |                    |                    |     |       |         |
| GO:0050684                           | 0.0027527937845859        | 11.7713815789474                                                        |                    | 0.280880215902014  |     |       |         |
| 3                                    | 41                        | regulation of mRNA processing                                           |                    |                    |     |       |         |
| GO:0018205                           | 0.00282738089969911       | 5.56007509386733                                                        |                    | 0.965953913223998  |     |       |         |
| 5                                    | 141                       | peptidyl-lysine modification                                            |                    |                    |     |       |         |
| GO:0034243                           | 0.00293226963861002       | 29.5711340206186                                                        |                    | 0.0822088436786382 |     |       |         |
| 2                                    | 12                        | regulation of transcription elongation from RNA polymerase II promoter  |                    |                    |     |       |         |
| GO:0043966                           | 0.00336976613982241       | 10.9077743902439                                                        |                    | 0.301432426821673  |     |       |         |
| 3                                    | 44                        | histone H3 acetylation                                                  |                    |                    |     |       |         |
| GO:0001832                           | 0.00344997965876219       | 26.8809746954077                                                        |                    | 0.089059580651858  |     |       |         |
| 2                                    | 13                        | blastocyst growth                                                       |                    |                    |     |       |         |
| GO:0006511                           | 0.00350669296113077       | 3.45622916409433                                                        |                    | 2.49366825825202   |     |       |         |
| 8                                    | 364                       | ubiquitin-dependent protein catabolic process                           |                    |                    |     |       |         |
| GO:0008629                           | 0.00365319924625485       | 6.82488038277512                                                        |                    | 0.630267801536226  |     |       |         |
| 4                                    | 92                        | induction of apoptosis by intracellular signals                         |                    |                    |     |       |         |
| GO:0019941                           | 0.00393365268343782       | 3.3878848424303                                                         | 2.54162341706456   |                    | 8   |       |         |
| 371                                  |                           | modification-dependent protein catabolic process                        |                    |                    |     |       |         |
| GO:0051457                           | 0.00400706415907981       | 24.639175257732                                                         | 0.0959103176250778 |                    | 2   |       |         |
| 14                                   |                           | maintenance of protein location in nucleus                              |                    |                    |     |       |         |
| GO:0043632                           | 0.00412851483988718       | 3.359394703657                                                          | 2.56217562798422   |                    | 8   |       |         |
| 374                                  |                           | modification-dependent macromolecule catabolic process                  |                    |                    |     |       |         |
| GO:0032434                           | 0.00431473509296612       | 9.93541666666667                                                        |                    | 0.328835374714553  |     |       |         |
| 3                                    | 48                        | regulation of proteasomal ubiquitin-dependent protein catabolic process |                    |                    |     |       |         |
| GO:0000070                           | 0.0045735241388741        | 9.71875                                                                 | 0.335686111687772  | 3                  | 49  |       |         |
| mitotic sister chromatid segregation |                           |                                                                         |                    |                    |     |       |         |
| GO:0031146                           | 0.00460297042707586       | 22.7422680412371                                                        |                    | 0.102761054598298  |     |       |         |
| 2                                    | 15                        | SCF-dependent proteasomal ubiquitin-dependent protein catabolic process |                    |                    |     |       |         |
| GO:0051603                           | 0.00521737929362048       | 3.22367396383144                                                        |                    | 2.66493668258252   |     |       |         |
| 8                                    | 389                       | proteolysis involved in cellular protein catabolic process              |                    |                    |     |       |         |
| GO:0032786                           | 0.00523715134210935       | 21.1163475699558                                                        |                    | 0.109611791571518  |     |       |         |
| 2                                    | 16                        | positive regulation of DNA-dependent transcription, elongation          |                    |                    |     |       |         |
| GO:0000819                           | 0.00540553901069568       | 9.1218112244898                                                         | 0.356238322607432  |                    | 3   |       |         |
| 52                                   |                           | sister chromatid segregation                                            |                    |                    |     |       |         |
| GO:0006917                           | 0.00570987006360094       | 3.17233154442457                                                        |                    | 2.70604110442184   |     |       |         |
| 8                                    | 395                       | induction of apoptosis                                                  |                    |                    |     |       |         |
| GO:0012502                           | 0.00596907556326967       | 3.14725274725275                                                        |                    | 2.7265933153415    | 8   |       |         |
| 398                                  |                           | induction of programmed cell death                                      |                    |                    |     |       |         |
| GO:0044257                           | 0.00632855386116627       | 3.11440843420539                                                        |                    | 2.75399626323438   |     |       |         |
| 8                                    | 402                       | cellular protein catabolic process                                      |                    |                    |     |       |         |
| GO:0061136                           | 0.00698286457656797       | 8.27430555555556                                                        |                    | 0.390492007473531  |     |       |         |
| 3                                    | 57                        | regulation of proteasomal protein catabolic process                     |                    |                    |     |       |         |
| GO:0051028                           | 0.00709591086384157       | 5.60550909985243                                                        |                    | 0.760431804027403  |     |       |         |
| 4                                    | 111                       | mRNA transport                                                          |                    |                    |     |       |         |
| GO:0006103                           | 0.00736395360587303       | 17.3862947240752                                                        |                    | 0.130164002491177  |     |       |         |
| 2                                    | 19                        | 2-oxoglutarate metabolic process                                        |                    |                    |     |       |         |
| GO:0031365                           | 0.00736395360587303       | 17.3862947240752                                                        |                    | 0.130164002491177  |     |       |         |
| 2                                    | 19                        | N-terminal protein amino acid modification                              |                    |                    |     |       |         |
| GO:0031648                           | 0.00736395360587303       | 17.3862947240752                                                        |                    | 0.130164002491177  |     |       |         |
| 2                                    | 19                        | protein destabilization                                                 |                    |                    |     |       |         |
| GO:0045637                           | 0.0087689923227001        | 5.25872576177285                                                        |                    | 0.808386962839942  |     |       |         |
| 4                                    | 118                       | regulation of myeloid cell differentiation                              |                    |                    |     |       |         |
| GO:0051052                           | 0.00903878426481114       | 4.16451157869989                                                        |                    | 1.27423707701889   |     |       |         |
| 5                                    | 186                       | regulation of DNA metabolic process                                     |                    |                    |     |       |         |
| Tissue: Whole_Blood=>Thyroid         |                           | Type: asymmetric                                                        |                    |                    |     |       |         |
| SourceGene:                          | SREBF2(ENSG00000198911.6) |                                                                         |                    |                    |     |       |         |
| TargetGeneSet:                       | RPL22                     | C1QA                                                                    | C1QC               | C1QB               | RP4 | RPS27 | HMG2P18 |

Stable4\_20PerPair

| GO:ID      | Pvalue               | OddsRatio                                                           | ExpCount         | Count             | Size               | Term             |
|------------|----------------------|---------------------------------------------------------------------|------------------|-------------------|--------------------|------------------|
| GO:0006415 | 5.46155160304568e-22 |                                                                     | 80.7800751879699 |                   |                    | 0.31485710331465 |
| 15         | 91                   | translational termination                                           |                  |                   |                    |                  |
| GO:0006414 | 5.36924710258027e-21 |                                                                     | 68.147619047619  | 0.363296657670749 |                    | 15               |
| 105        |                      | translational elongation                                            |                  |                   |                    |                  |
| GO:0006614 | 5.36924710258027e-21 |                                                                     | 68.147619047619  | 0.363296657670749 |                    | 15               |
| 105        |                      | SRP-dependent cotranslational protein targeting to membrane         |                  |                   |                    |                  |
| GO:0006613 | 6.23999991538573e-21 |                                                                     | 67.3940345368917 |                   | 0.366756625839042  |                  |
| 15         | 106                  | cotranslational protein targeting to membrane                       |                  |                   |                    |                  |
| GO:0045047 | 6.23999991538573e-21 |                                                                     | 67.3940345368917 |                   | 0.366756625839042  |                  |
| 15         | 106                  | protein targeting to ER                                             |                  |                   |                    |                  |
| GO:0072599 | 6.23999991538573e-21 |                                                                     | 67.3940345368917 |                   | 0.366756625839042  |                  |
| 15         | 106                  | establishment of protein localization to endoplasmic reticulum      |                  |                   |                    |                  |
| GO:0070972 | 3.38727394618744e-20 |                                                                     | 59.4923717059639 |                   | 0.408276243858556  |                  |
| 15         | 118                  | protein localization to endoplasmic reticulum                       |                  |                   |                    |                  |
| GO:0000184 | 3.86696228041177e-20 |                                                                     | 58.9162087912088 |                   | 0.411736212026849  |                  |
| 15         | 119                  | nuclear-transcribed mRNA catabolic process, nonsense-mediated decay |                  |                   |                    |                  |
| GO:0034623 | 3.34592963438323e-19 |                                                                     | 42.421444527178  | 0.602034461282956 |                    | 16               |
| 174        |                      | cellular macromolecular complex disassembly                         |                  |                   |                    |                  |
| GO:0032984 | 5.31378881271477e-19 |                                                                     | 41.1057380007218 |                   | 0.61933430212442   |                  |
| 16         | 179                  | macromolecular complex disassembly                                  |                  |                   |                    |                  |
| GO:0019080 | 1.56537407444312e-18 |                                                                     | 44.952731092437  | 0.522455193412221 |                    | 15               |
| 151        |                      | viral genome expression                                             |                  |                   |                    |                  |
| GO:0019083 | 1.56537407444312e-18 |                                                                     | 44.952731092437  | 0.522455193412221 |                    | 15               |
| 151        |                      | viral transcription                                                 |                  |                   |                    |                  |
| GO:0006413 | 1.73278747921261e-18 |                                                                     | 44.621480709072  | 0.525915161580513 |                    | 15               |
| 152        |                      | translational initiation                                            |                  |                   |                    |                  |
| GO:0006612 | 1.91673349877618e-18 |                                                                     | 44.2950310559006 |                   | 0.529375129748806  |                  |
| 15         | 153                  | protein targeting to membrane                                       |                  |                   |                    |                  |
| GO:0043624 | 1.91673349877618e-18 |                                                                     | 44.2950310559006 |                   | 0.529375129748806  |                  |
| 15         | 153                  | cellular protein complex disassembly                                |                  |                   |                    |                  |
| GO:0043241 | 3.14143990266426e-18 |                                                                     | 42.7312687312687 |                   | 0.546674970590271  |                  |
| 15         | 158                  | protein complex disassembly                                         |                  |                   |                    |                  |
| GO:0006401 | 4.80346781339796e-18 |                                                                     | 35.3862433862434 |                   | 0.709293474500035  |                  |
| 16         | 205                  | RNA catabolic process                                               |                  |                   |                    |                  |
| GO:0000956 | 8.8021397121475e-18  |                                                                     | 39.6484230055659 |                   | 0.584734620441492  |                  |
| 15         | 169                  | nuclear-transcribed mRNA catabolic process                          |                  |                   |                    |                  |
| GO:0006402 | 1.9411925709822e-17  |                                                                     | 37.4355828220859 |                   | 0.615874333956128  |                  |
| 15         | 178                  | mRNA catabolic process                                              |                  |                   |                    |                  |
| GO:0072594 | 1.52997242797413e-16 |                                                                     | 32.2267573696145 |                   | 0.705833506331742  |                  |
| 15         | 204                  | establishment of protein localization to organelle                  |                  |                   |                    |                  |
| GO:0071845 | 8.77764533169957e-16 |                                                                     | 24.8165057067603 |                   | 0.98263095979517   |                  |
| 16         | 284                  | cellular component disassembly at cellular level                    |                  |                   |                    |                  |
| GO:0019058 | 9.88046726504687e-16 |                                                                     | 28.1448412698413 |                   | 0.799252646875649  |                  |
| 15         | 231                  | viral infectious cycle                                              |                  |                   |                    |                  |
| GO:0022411 | 1.09469512259589e-15 |                                                                     | 24.4446366782007 |                   | 0.996470832468341  |                  |
| 16         | 288                  | cellular component disassembly                                      |                  |                   |                    |                  |
| GO:0022415 | 5.74240783472818e-15 |                                                                     | 24.7626822157434 |                   | 0.899591723756141  |                  |
| 15         | 260                  | viral reproductive process                                          |                  |                   |                    |                  |
| GO:0016032 | 7.15927499949212e-14 |                                                                     | 16.5786203044268 |                   | 1.56044564390008   |                  |
| 17         | 451                  | viral reproduction                                                  |                  |                   |                    |                  |
| GO:0033365 | 3.34230472782977e-11 |                                                                     | 13.0470991890206 |                   | 1.63656494360252   |                  |
| 15         | 473                  | protein localization to organelle                                   |                  |                   |                    |                  |
| GO:0006605 | 3.4434807145423e-11  |                                                                     | 13.0177404295051 |                   | 1.64002491177081   |                  |
| 15         | 474                  | protein targeting                                                   |                  |                   |                    |                  |
| GO:0042274 | 3.06614596131556e-05 |                                                                     | 61.2170212765957 |                   | 0.0622794270292713 |                  |
| 3          | 18                   | ribosomal small subunit biogenesis                                  |                  |                   |                    |                  |

Stable4\_20PerPair

|            |                      |                                                                        |                    |   |
|------------|----------------------|------------------------------------------------------------------------|--------------------|---|
| GO:0002253 | 7.05025891710982e-05 | 7.86580121057662                                                       | 1.03453048231956   |   |
| 7          | 299                  | activation of immune response                                          |                    |   |
| GO:0000028 | 0.000174438093056294 | 149.96875                                                              | 0.0207598090097571 | 2 |
| 6          |                      | ribosomal small subunit assembly                                       |                    |   |
| GO:0050778 | 0.000238634397527419 | 6.40401276789786                                                       | 1.2594284132586    | 7 |
| 364        |                      | positive regulation of immune response                                 |                    |   |
| GO:0006958 | 0.000681278069094101 | 19.4938886373925                                                       | 0.172998408414643  |   |
| 3          | 50                   | complement activation, classical pathway                               |                    |   |
| GO:0022613 | 0.00104845951084384  | 7.16212121212121                                                       | 0.778492837865892  |   |
| 5          | 225                  | ribonucleoprotein complex biogenesis                                   |                    |   |
| GO:0006956 | 0.00133742369874619  | 15.2563829787234                                                       | 0.21797799460245   |   |
| 3          | 63                   | complement activation                                                  |                    |   |
| GO:0042255 | 0.00136496319274614  | 42.8184523809524                                                       | 0.0553594906926856 |   |
| 2          | 16                   | ribosome assembly                                                      |                    |   |
| GO:0071843 | 0.00137103252344914  | 6.72697056030389                                                       | 0.826932392221992  |   |
| 5          | 239                  | cellular component biogenesis at cellular level                        |                    |   |
| GO:0001817 | 0.00142445078473875  | 5.42673190831831                                                       | 1.24212857241713   |   |
| 6          | 359                  | regulation of cytokine production                                      |                    |   |
| GO:0002455 | 0.00146397411224734  | 14.7621825669183                                                       | 0.224897930939035  |   |
| 3          | 65                   | humoral immune response mediated by circulating immunoglobulin         |                    |   |
| GO:0046632 | 0.00146397411224734  | 14.7621825669183                                                       | 0.224897930939035  |   |
| 3          | 65                   | alpha-beta T cell differentiation                                      |                    |   |
| GO:0043372 | 0.00154354313670416  | 39.9611111111111                                                       | 0.0588194588609785 |   |
| 2          | 17                   | positive regulation of CD4-positive, alpha-beta T cell differentiation |                    |   |
| GO:0042254 | 0.00172982013550401  | 8.54932533733133                                                       | 0.515535257075635  |   |
| 4          | 149                  | ribosome biogenesis                                                    |                    |   |
| GO:0045076 | 0.00193222176422743  | 35.2549019607843                                                       | 0.0657393951975642 |   |
| 2          | 19                   | regulation of interleukin-2 biosynthetic process                       |                    |   |
| GO:2000516 | 0.00193222176422743  | 35.2549019607843                                                       | 0.0657393951975642 |   |
| 2          | 19                   | positive regulation of CD4-positive, alpha-beta T cell activation      |                    |   |
| GO:0071706 | 0.00204450628494989  | 13.0677811550152                                                       | 0.252577676285378  |   |
| 3          | 73                   | tumor necrosis factor superfamily cytokine production                  |                    |   |
| GO:0001816 | 0.00230931400200473  | 4.9118953026408                                                        | 1.36668742647568   | 6 |
| 395        |                      | cytokine production                                                    |                    |   |
| GO:0042094 | 0.00236244676993409  | 31.5394736842105                                                       | 0.0726593315341499 |   |
| 2          | 21                   | interleukin-2 biosynthetic process                                     |                    |   |
| GO:0030225 | 0.00259296101324586  | 29.9604166666667                                                       | 0.0761192997024427 |   |
| 2          | 22                   | macrophage differentiation                                             |                    |   |
| GO:0046631 | 0.00284836220456694  | 11.5717748451387                                                       | 0.283717389800014  |   |
| 3          | 82                   | alpha-beta T cell activation                                           |                    |   |
| GO:0072376 | 0.00284836220456694  | 11.5717748451387                                                       | 0.283717389800014  |   |
| 3          | 82                   | protein activation cascade                                             |                    |   |
| GO:0006909 | 0.00325985358161567  | 11.0110228146629                                                       | 0.297557262473185  |   |
| 3          | 86                   | phagocytosis                                                           |                    |   |
| GO:0002521 | 0.0037865254952186   | 5.2764683875795                                                        | 1.04491038682444   | 5 |
| 302        |                      | leukocyte differentiation                                              |                    |   |
| GO:0043370 | 0.00389673425792935  | 23.96                                                                  | 0.093419140543907  | 2 |
| 27         |                      | regulation of CD4-positive, alpha-beta T cell differentiation          |                    |   |
| GO:0001819 | 0.00393115330481027  | 6.7559990496555                                                        | 0.647014047470763  | 4 |
| 187        |                      | positive regulation of cytokine production                             |                    |   |
| GO:0022618 | 0.00431401968990256  | 9.92761332099908                                                       | 0.328696975987821  |   |
| 3          | 95                   | ribonucleoprotein complex assembly                                     |                    |   |
| GO:2000514 | 0.00448750684712852  | 22.1820987654321                                                       | 0.100339076880493  |   |
| 2          | 29                   | regulation of CD4-positive, alpha-beta T cell activation               |                    |   |
| GO:0042110 | 0.00477401966054854  | 4.98478414720453                                                       | 1.10372984568542   |   |
| 5          | 319                  | T cell activation                                                      |                    |   |
| GO:0046638 | 0.00479746029912768  | 21.3883928571429                                                       | 0.103799045048786  |   |
| 2          | 30                   | positive regulation of alpha-beta T cell differentiation               |                    |   |
| GO:0071826 | 0.00497922049308118  | 9.4125904803685                                                        | 0.345996816829285  | 3 |
| 100        |                      | ribonucleoprotein complex subunit organization                         |                    |   |
| GO:0030097 | 0.00504328122791284  | 4.16073204694649                                                       | 1.60196526191959   |   |
| 6          | 463                  | hemopoiesis                                                            |                    |   |



Stable4\_20PerPair

|                                                                       |                                                                                      |                  |                        |
|-----------------------------------------------------------------------|--------------------------------------------------------------------------------------|------------------|------------------------|
| GO:0032760                                                            | 0.0054461620521191                                                                   | 19.9597222222222 | 0.110718981385371      |
| 2 32                                                                  | positive regulation of tumor necrosis factor production                              |                  |                        |
| GO:0006364                                                            | 0.00555360540278177                                                                  | 9.03728670739414 | 0.359836689502457      |
| 3 104                                                                 | rRNA processing                                                                      |                  |                        |
| GO:0016072                                                            | 0.0064872011323432                                                                   | 8.52694372638696 | 0.380596498512214      |
| 3 110                                                                 | rRNA metabolic process                                                               |                  |                        |
| GO:0016064                                                            | 0.0066513335552234                                                                   | 8.44739952718676 | 0.384056466680507      |
| 3 111                                                                 | immunoglobulin mediated immune response                                              |                  |                        |
| GO:0048534                                                            | 0.00694240379473592                                                                  | 3.87953151143335 | 1.71268424330496       |
| 6 495                                                                 | hemopoietic or lymphoid organ development                                            |                  |                        |
| GO:0019724                                                            | 0.00715855032465881                                                                  | 8.21736630247269 | 0.394436371185385      |
| 3 114                                                                 | B cell mediated immunity                                                             |                  |                        |
| GO:0030099                                                            | 0.0077615939744837                                                                   | 5.52856307272373 | 0.785412774202477      |
| 4 227                                                                 | myeloid cell differentiation                                                         |                  |                        |
| GO:0032663                                                            | 0.00801194098606083                                                                  | 16.1756756756757 | 0.134938758563421      |
| 2 39                                                                  | regulation of interleukin-2 production                                               |                  |                        |
| GO:0046637                                                            | 0.00841510248029055                                                                  | 15.7489035087719 | 0.138398726731714      |
| 2 40                                                                  | regulation of alpha-beta T cell differentiation                                      |                  |                        |
| GO:0006959                                                            | 0.00862134695839894                                                                  | 7.66064723761845 | 0.422116116531728      |
| 3 122                                                                 | humoral immune response                                                              |                  |                        |
| GO:0002757                                                            | 0.0087452078709616                                                                   | 5.33408620365142 | 0.81309251954882       |
| 4 235                                                                 | immune response-activating signal transduction                                       |                  |                        |
| GO:0043367                                                            | 0.00882722417092368                                                                  | 15.3440170940171 | 0.141858694900007      |
| 2 41                                                                  | CD4-positive, alpha-beta T cell differentiation                                      |                  |                        |
| GO:0035710                                                            | 0.00967809142555777                                                                  | 14.5934959349593 | 0.148778631236593      |
| 2 43                                                                  | CD4-positive, alpha-beta T cell activation                                           |                  |                        |
| GO:0046635                                                            | 0.00967809142555777                                                                  | 14.5934959349593 | 0.148778631236593      |
| 2 43                                                                  | positive regulation of alpha-beta T cell activation                                  |                  |                        |
| Tissue: whole_Blood=>Thyroid                                          | Type: cluster                                                                        |                  |                        |
| SourceGene:                                                           | SST(ENSG00000157005.3)                                                               |                  |                        |
| TargetGeneSet:                                                        | LRRRC47 KIAA0090 MFI2 UQCRH RP4 GSTM3 NBPF10                                         |                  |                        |
| PIAS3 ADAR ZBTB7B METTL13 QSOX1 DHX9 URB2 HEATR1 MORN2 MSH6           |                                                                                      |                  |                        |
| HMGAI1P8 POLR1B TMEM185B ITGB6 GORASP2 TSK FARP2 XCR1 RP11            |                                                                                      |                  |                        |
| LETM1 CNGA1 NUP155 CTD SKIV2L2 PHAX SEC24A AFAP1L1 PRRC2A ZBTB9 PGM3  |                                                                                      |                  |                        |
| LATS1 PRR18 HEATR2 C7orf26 POM121C MEPCE ABCF2 MTMR9 PRKDC UQCRB      |                                                                                      |                  |                        |
| ZFP41 STOML2 TLN1 UBQLN1 SEC16A BMS1P7 SEC24C SEC23IP NUP98 SPTY2D1   |                                                                                      |                  |                        |
| PRPF19 UBE4A ARCNI DDX6 CBX5 ANKRD52 CAND1 GCN1L1 ZIC2 PRMT5-AS1      |                                                                                      |                  |                        |
| PRMT5 TUBGCP4 TNFAIP8L3 RNF111 RNF40 POLR2C EDC4 PIEZO1 TIMM22 RP13   |                                                                                      |                  |                        |
| DPH1 TP53 GRAP LIG3 TEX34 CA10 GNA11 FEM1A ZNF562 RAVR1               |                                                                                      |                  |                        |
| CHERP MPV17L2 TOMM40 GRWD1 TRIM28 CDH22 SLC2A10 ADNP GCNT7 PRPF6 PWP2 |                                                                                      |                  |                        |
| CRKL SF3A1 BCOR SMC1A APEX2 HCFC1                                     |                                                                                      |                  |                        |
| GOBPID                                                                | Pvalue OddsRatio ExpCount Count Size Term                                            |                  |                        |
| GO:0000377                                                            | 1.15365543243125e-08                                                                 | 12.0624854999613 | 1.10110026987752       |
| 11 204                                                                | RNA splicing, via transesterification reactions with bulged adenosine as nucleophile |                  |                        |
| GO:0000398                                                            | 1.15365543243125e-08                                                                 | 12.0624854999613 | 1.10110026987752       |
| 11 204                                                                | nuclear mRNA splicing, via spliceosome                                               |                  |                        |
| GO:0000375                                                            | 1.48367893969954e-08                                                                 | 11.7537313432836 | 1.1280880215902 11     |
| 209                                                                   | RNA splicing, via transesterification reactions                                      |                  |                        |
| GO:0071843                                                            | 5.96174559502445e-07                                                                 | 9.08296943231441 | 1.29001453186631       |
| 10 239                                                                | cellular component biogenesis at cellular level                                      |                  |                        |
| GO:0022618                                                            | 7.66284453746082e-07                                                                 | 16.0043213828425 | 0.512767282541001      |
| 7 95                                                                  | ribonucleoprotein complex assembly                                                   |                  |                        |
| GO:0071826                                                            | 1.08642122355679e-06                                                                 | 15.1385733757383 | 0.539755034253685      |
| 7 100                                                                 | ribonucleoprotein complex subunit organization                                       |                  |                        |
| GO:0008380                                                            | 1.20153249783804e-06                                                                 | 7.39911021814007 | 1.7434087606394 11     |
| 323                                                                   | RNA splicing                                                                         |                  |                        |
| GO:0006397                                                            | 1.39444324278229e-06                                                                 | 6.5708245243129  | 2.1536225866722 12 399 |
| mRNA processing                                                       |                                                                                      |                  |                        |
| GO:0022613                                                            | 3.29035265921355e-06                                                                 | 8.54891304347826 | 1.21444882707079       |
| 9 225                                                                 | ribonucleoprotein complex biogenesis                                                 |                  |                        |
| GO:0048199                                                            | 1.2541880371997e-05                                                                  | 33.7250293772033 | 0.145733859248495      |
| 4 27                                                                  | vesicle targeting, to, from or within Golgi                                          |                  |                        |

Stable4\_20PerPair

|            |                      |                                                             |                    |                    |
|------------|----------------------|-------------------------------------------------------------|--------------------|--------------------|
| GO:0000387 | 2.21207823724036e-05 | 28.7207207207207                                            |                    | 0.167324060618642  |
| 4          | 31                   | spliceosomal snRNP assembly                                 |                    |                    |
| GO:0006901 | 3.62128744856227e-05 | 25.0078465562337                                            |                    | 0.18891426198879   |
| 4          | 35                   | vesicle coating                                             |                    |                    |
| GO:0006900 | 4.53053923311206e-05 | 23.4889434889435                                            |                    | 0.199709362673863  |
| 4          | 37                   | membrane budding                                            |                    |                    |
| GO:0006903 | 4.53053923311206e-05 | 23.4889434889435                                            |                    | 0.199709362673863  |
| 4          | 37                   | vesicle targeting                                           |                    |                    |
| GO:0048207 | 6.56901663562067e-05 | 47.87                                                       | 0.0809632551380527 | 3 15               |
|            |                      | vesicle targeting, rough ER to cis-Golgi                    |                    |                    |
| GO:0048208 | 6.56901663562067e-05 | 47.87                                                       | 0.0809632551380527 | 3 15               |
|            |                      | COPII vesicle coating                                       |                    |                    |
| GO:0090114 | 6.56901663562067e-05 | 47.87                                                       | 0.0809632551380527 | 3 15               |
|            |                      | COPII-coated vesicle budding                                |                    |                    |
| GO:0051650 | 0.000127608563505716 | 17.6031941031941                                            |                    | 0.259082416441769  |
| 4          | 48                   | establishment of vesicle localization                       |                    |                    |
| GO:0006122 | 0.000171364275136886 | 189.092105263158                                            |                    | 0.0215902013701474 |
| 2          | 4                    | mitochondrial electron transport, ubiquinol to cytochrome c |                    |                    |
| GO:0006281 | 0.000213198878765418 | 4.88223668914206                                            |                    | 2.06726178119161   |
| 9          | 383                  | DNA repair                                                  |                    |                    |
| GO:0002326 | 0.000284606396846764 | 126.052631578947                                            |                    | 0.0269877517126842 |
| 2          | 5                    | B cell lineage commitment                                   |                    |                    |
| GO:0051648 | 0.000414255240652964 | 12.6823216659282                                            |                    | 0.350840772264895  |
| 4          | 65                   | vesicle localization                                        |                    |                    |
| GO:0000244 | 0.000425414344459507 | 94.5328947368421                                            |                    | 0.0323853020552211 |
| 2          | 6                    | assembly of spliceosomal tri-snRNP                          |                    |                    |
| GO:0007006 | 0.00073451305538224  | 19.124                                                      | 0.178119161303716  | 3 33               |
|            |                      | mitochondrial membrane organization                         |                    |                    |
| GO:0051095 | 0.000788557041987128 | 63.0131578947368                                            |                    | 0.0431804027402948 |
| 2          | 8                    | regulation of helicase activity                             |                    |                    |
| GO:0006403 | 0.000835014385006894 | 7.44640803095263                                            |                    | 0.734066846585011  |
| 5          | 136                  | RNA localization                                            |                    |                    |
| GO:0016044 | 0.000983353545347316 | 4.31328455910666                                            |                    | 2.04567157982147   |
| 8          | 379                  | cellular membrane organization                              |                    |                    |
| GO:0000245 | 0.00102994617045959  | 16.8694117647059                                            |                    | 0.199709362673863  |
| 3          | 37                   | spliceosomal complex assembly                               |                    |                    |
| GO:0061024 | 0.00103451672924188  | 4.277769289534                                              | 2.06186423084908   | 8                  |
| 382        |                      | membrane organization                                       |                    |                    |
| GO:0016050 | 0.00147111728672856  | 8.87604846225536                                            |                    | 0.491177081170853  |
| 4          | 91                   | vesicle organization                                        |                    |                    |
| GO:0006997 | 0.00182360238199878  | 13.6485714285714                                            |                    | 0.242889765414158  |
| 3          | 45                   | nucleus organization                                        |                    |                    |
| GO:0007007 | 0.00183288240692901  | 37.7973684210526                                            |                    | 0.0647706041104422 |
| 2          | 12                   | inner mitochondrial membrane organization                   |                    |                    |
| GO:0008340 | 0.00183288240692901  | 37.7973684210526                                            |                    | 0.0647706041104422 |
| 2          | 12                   | determination of adult lifespan                             |                    |                    |
| GO:0051656 | 0.00215795043950319  | 7.95541933686264                                            |                    | 0.545152584596222  |
| 4          | 101                  | establishment of organelle localization                     |                    |                    |
| GO:0002360 | 0.00215856763415339  | 34.3588516746412                                            |                    | 0.070168154452979  |
| 2          | 13                   | T cell lineage commitment                                   |                    |                    |
| GO:0006486 | 0.00238648340456517  | 4.78556910569106                                            |                    | 1.36018268631929   |
| 6          | 252                  | protein glycosylation                                       |                    |                    |
| GO:0043413 | 0.00238648340456517  | 4.78556910569106                                            |                    | 1.36018268631929   |
| 6          | 252                  | macromolecule glycosylation                                 |                    |                    |
| GO:0070085 | 0.0025315329577764   | 4.72690763052209                                            |                    | 1.3763753373469 6  |
| 255        |                      | glycosylation                                               |                    |                    |
| GO:0006888 | 0.00324380592768268  | 11.0161538461538                                            |                    | 0.296865268839527  |
| 3          | 55                   | ER to Golgi vesicle-mediated transport                      |                    |                    |
| GO:0051053 | 0.00377127759435451  | 10.4130909090909                                            |                    | 0.313057919867137  |
| 3          | 58                   | negative regulation of DNA metabolic process                |                    |                    |
| GO:0010390 | 0.00416076748304574  | 23.6134868421053                                            |                    | 0.0971559061656633 |
| 2          | 18                   | histone monoubiquitination                                  |                    |                    |
| GO:0009303 | 0.00463406501533718  | 22.2229102167183                                            |                    | 0.1025534565082 2  |

STable4\_20PerPair

|                                                               |                                                                                                        |                  |                   |                   |                  |         |         |                   |            |
|---------------------------------------------------------------|--------------------------------------------------------------------------------------------------------|------------------|-------------------|-------------------|------------------|---------|---------|-------------------|------------|
| 19                                                            | rRNA transcription                                                                                     |                  |                   |                   |                  |         |         |                   |            |
| GO:0050657                                                    | 0.00519506983914373                                                                                    | 6.1612972972973  | 0.696283994187254 |                   |                  |         |         |                   | 4          |
| 129                                                           | nucleic acid transport                                                                                 |                  |                   |                   |                  |         |         |                   |            |
| GO:0050658                                                    | 0.00519506983914373                                                                                    | 6.1612972972973  | 0.696283994187254 |                   |                  |         |         |                   | 4          |
| 129                                                           | RNA transport                                                                                          |                  |                   |                   |                  |         |         |                   |            |
| GO:0051236                                                    | 0.00519506983914373                                                                                    | 6.1612972972973  | 0.696283994187254 |                   |                  |         |         |                   | 4          |
| 129                                                           | establishment of RNA localization                                                                      |                  |                   |                   |                  |         |         |                   |            |
| GO:0006310                                                    | 0.00541934970834893                                                                                    | 4.75725221595487 |                   | 1.1280880215902   |                  |         |         |                   | 5          |
| 209                                                           | DNA recombination                                                                                      |                  |                   |                   |                  |         |         |                   |            |
| GO:0009101                                                    | 0.00587069167689304                                                                                    | 3.94949494949495 |                   | 1.63545775378867  |                  |         |         |                   |            |
| 6                                                             | 303 glycoprotein biosynthetic process                                                                  |                  |                   |                   |                  |         |         |                   |            |
| GO:0006471                                                    | 0.0061948900365192                                                                                     | 18.8855263157895 |                   | 0.118746107535811 |                  |         |         |                   |            |
| 2                                                             | 22 protein ADP-ribosylation                                                                            |                  |                   |                   |                  |         |         |                   |            |
| GO:0010259                                                    | 0.00735028424056083                                                                                    | 17.1662679425837 |                   | 0.129541208220884 |                  |         |         |                   |            |
| 2                                                             | 24 multicellular organismal aging                                                                      |                  |                   |                   |                  |         |         |                   |            |
| GO:0006289                                                    | 0.00801726283746006                                                                                    | 7.83561643835616 |                   | 0.4102138260328   |                  |         |         |                   | 3          |
| 76                                                            | nucleotide-excision repair                                                                             |                  |                   |                   |                  |         |         |                   |            |
| GO:0000291                                                    | 0.00859516597238188                                                                                    | 15.7335526315789 |                   | 0.140336308905958 |                  |         |         |                   |            |
| 2                                                             | 26 nuclear-transcribed mRNA catabolic process, exonucleolytic                                          |                  |                   |                   |                  |         |         |                   |            |
| GO:0043928                                                    | 0.00859516597238188                                                                                    | 15.7335526315789 |                   | 0.140336308905958 |                  |         |         |                   |            |
| 2                                                             | 26 exonucleolytic nuclear-transcribed mRNA catabolic process involved in deadenylation-dependent decay |                  |                   |                   |                  |         |         |                   |            |
| GO:0015931                                                    | 0.00878355991970019                                                                                    | 5.26730840429471 |                   | 0.809632551380527 |                  |         |         |                   |            |
| 4                                                             | 150 nucleobase-containing compound transport                                                           |                  |                   |                   |                  |         |         |                   |            |
| GO:0051640                                                    | 0.00878355991970019                                                                                    | 5.26730840429471 |                   | 0.809632551380527 |                  |         |         |                   |            |
| 4                                                             | 150 organelle localization                                                                             |                  |                   |                   |                  |         |         |                   |            |
| GO:0016925                                                    | 0.0099275250191223                                                                                     | 14.5212550607287 |                   | 0.151131409591032 |                  |         |         |                   |            |
| 2                                                             | 28 protein sumoylation                                                                                 |                  |                   |                   |                  |         |         |                   |            |
| Tissue: whole_Blood=>Thyroid Type: cluster                    |                                                                                                        |                  |                   |                   |                  |         |         |                   |            |
| SourceGene: TMEM191A(ENSG00000226287.3)                       |                                                                                                        |                  |                   |                   |                  |         |         |                   |            |
| TargetGeneSet: NOC2L UBE2J2 SPEN NUDC EYA3 TXLNA EIF2C3 STK40 |                                                                                                        |                  |                   |                   |                  |         |         |                   |            |
| AKIRIN1                                                       | TOE1                                                                                                   | SELRC1           | RP4               | PYGO2             | UBQLN4           | CCT3    | ETV3    | TTC32             | ERLEC1     |
| PCBP1                                                         | TMEM127                                                                                                | RBP4             | HSPD1             | C2orf69           | INHA             | CLN5    | NKIRAS1 | TMEM158           | TMEM115    |
| FYTTD1                                                        | LETM1                                                                                                  | GRPEL1           | RP11              | ANKRD17           | EIF4E            | CCRN4L  | ANKRA2  | PHAX              | SLC35A4    |
| RBM22                                                         | ABHD16A                                                                                                | LY6G6E           | DAXX              | BRPF3             | TBC1D22B         |         | RPL7L1  | RP13              | ARID1B     |
| TULP4                                                         | USP42                                                                                                  | PURB             | HUS1              | BAZ1B             | MEPCE            | ABCF2   | PINX1   | LSM12P1           | KAT6A      |
| DNAJA1                                                        | TEX10                                                                                                  | TBC1D13          | TOR1B             | RNLS              | LZTS2            | NOLC1   | AFAP1L2 | TSSC4             | NUP98 NXF1 |
| MARK2                                                         | STIP1                                                                                                  | SF1              | C11orf68          |                   | PAFAH1B2         |         | C2CD2L  | SC5DL             | HSPA8      |
| PKNOX2                                                        | FKBP4                                                                                                  | NOP2             | FMNL3             | AVIL              | GCN1L1           | GPR133  | PUS1    | PDS5B             | TARDBPP2   |
| FAM70B                                                        | SALL2                                                                                                  | RBM23            | PRMT5             | EIF2B2            | DIO2             | IDH3A   | DNAJA4  | CHRNA3            | CD2BP2     |
| TBC1D10B                                                      |                                                                                                        | RNF40            | SETD1A            | E2F4              | CIRH1A           | USP10   | VPS53   | TSR1              | ALKBH5     |
| USP22                                                         | GIT1                                                                                                   | PPP1R9B          | MED13             | SIRT7             | RBBP8            | NFIC    | MAP2K2  | FEM1A             | ZNF562     |
| ELOF1                                                         | DNAJB1                                                                                                 | BRD4             | ARMC6             | GATAD2A           | IRF2BP1          | GRWD1   | KCNJ14  | FIZ1              | TRIM28     |
| ZNF337                                                        | RP3                                                                                                    | LINC00478        |                   | IGLC5             | ST13             | L3MBTL2 | SMC1A   |                   |            |
| GOBPID                                                        | Pvalue                                                                                                 | OddsRatio        |                   | ExpCount          |                  | Count   | Size    | Term              |            |
| GO:0016570                                                    | 3.6230625639836e-06                                                                                    |                  |                   | 6.45975           | 1.93253062071829 |         |         | 11                | 261        |
| histone modification                                          |                                                                                                        |                  |                   |                   |                  |         |         |                   |            |
| GO:0006457                                                    | 4.49158677109177e-06                                                                                   |                  |                   | 7.07536783104794  |                  |         |         | 1.59933568611169  |            |
| 10                                                            | 216 protein folding                                                                                    |                  |                   |                   |                  |         |         |                   |            |
| GO:0016569                                                    | 4.50585519221402e-06                                                                                   |                  |                   | 6.3056640625      | 1.97695661199917 |         |         |                   | 11         |
| 267                                                           | covalent chromatin modification                                                                        |                  |                   |                   |                  |         |         |                   |            |
| GO:0016568                                                    | 1.29774902123674e-05                                                                                   |                  |                   | 4.74777277014988  |                  |         |         | 3.10241505778147  |            |
| 13                                                            | 419 chromatin modification                                                                             |                  |                   |                   |                  |         |         |                   |            |
| GO:0000377                                                    | 2.02722703576904e-05                                                                                   |                  |                   | 6.66357927786499  |                  |         |         | 1.51048370354993  |            |
| 9                                                             | 204 RNA splicing, via transesterification reactions with bulged adenosine as nucleophile               |                  |                   |                   |                  |         |         |                   |            |
| GO:0000398                                                    | 2.02722703576904e-05                                                                                   |                  |                   | 6.66357927786499  |                  |         |         | 1.51048370354993  |            |
| 9                                                             | 204 nuclear mRNA splicing, via spliceosome                                                             |                  |                   |                   |                  |         |         |                   |            |
| GO:0000375                                                    | 2.45554717631266e-05                                                                                   |                  |                   | 6.49469387755102  |                  |         |         | 1.54750536295066  |            |
| 9                                                             | 209 RNA splicing, via transesterification reactions                                                    |                  |                   |                   |                  |         |         |                   |            |
| GO:0000087                                                    | 7.19801848441197e-05                                                                                   |                  |                   | 4.59482449856733  |                  |         |         | 2.66555947685281  |            |
| 11                                                            | 360 M phase of mitotic cell cycle                                                                      |                  |                   |                   |                  |         |         |                   |            |
| GO:0000387                                                    | 7.663344165069e-05                                                                                     |                  |                   | 20.5925925925926  |                  |         |         | 0.229534288284548 |            |

Stable4\_20PerPair

|            |     |                                                       |                  |                   |                    |
|------------|-----|-------------------------------------------------------|------------------|-------------------|--------------------|
| 4          | 31  | spliceosomal snRNP assembly                           |                  |                   |                    |
| GO:0042026 |     | 8.27114288575499e-05                                  | 45.9455128205128 |                   | 0.0888519825617604 |
| 3          | 12  | protein refolding                                     |                  |                   |                    |
| GO:0008380 |     | 0.00013985244034312                                   | 4.62138928230295 |                   | 2.39159919728738   |
| 10         | 323 | RNA splicing                                          |                  |                   |                    |
| GO:0006397 |     | 0.000178321613870727                                  | 4.12145618556701 |                   | 2.95432842017853   |
| 11         | 399 | mRNA processing                                       |                  |                   |                    |
| GO:0006986 |     | 0.000389673072422535                                  | 6.86838927795219 |                   | 0.955158812538925  |
| 6          | 129 | response to unfolded protein                          |                  |                   |                    |
| GO:0061077 |     | 0.000476344630755438                                  | 22.9583333333333 |                   | 0.155490969483081  |
| 3          | 21  | chaperone-mediated protein folding                    |                  |                   |                    |
| GO:0035966 |     | 0.000516382493018023                                  | 6.4953541507997  | 1.00698913569995  | 6                  |
| 136        |     | response to topologically incorrect protein           |                  |                   |                    |
| GO:0006458 |     | 0.000543270386402793                                  | 11.8132617227845 |                   | 0.377620925887482  |
| 4          | 51  | 'de novo' protein folding                             |                  |                   |                    |
| GO:0022618 |     | 0.000691968692341552                                  | 7.7636165577342  | 0.703411528613937 | 5                  |
| 95         |     | ribonucleoprotein complex assembly                    |                  |                   |                    |
| GO:0000244 |     | 0.00079907177952278                                   | 68.2857142857143 |                   | 0.0444259912808802 |
| 2          | 6   | assembly of spliceosomal tri-snRNP                    |                  |                   |                    |
| GO:0048096 |     | 0.00079907177952278                                   | 68.2857142857143 |                   | 0.0444259912808802 |
| 2          | 6   | chromatin-mediated maintenance of transcription       |                  |                   |                    |
| GO:0070389 |     | 0.00079907177952278                                   | 68.2857142857143 |                   | 0.0444259912808802 |
| 2          | 6   | chaperone cofactor-dependent protein refolding        |                  |                   |                    |
| GO:0071826 |     | 0.000873285052963591                                  | 7.35242518059855 |                   | 0.74043318801467   |
| 5          | 100 | ribonucleoprotein complex subunit organization        |                  |                   |                    |
| GO:0030521 |     | 0.00113948759308705                                   | 9.56545028456645 |                   | 0.459068576569096  |
| 4          | 62  | androgen receptor signaling pathway                   |                  |                   |                    |
| GO:0000280 |     | 0.00115389361514591                                   | 3.77123107307439 |                   | 2.59151615805135   |
| 9          | 350 | nuclear division                                      |                  |                   |                    |
| GO:0007067 |     | 0.00115389361514591                                   | 3.77123107307439 |                   | 2.59151615805135   |
| 9          | 350 | mitosis                                               |                  |                   |                    |
| GO:0016573 |     | 0.00123404834008591                                   | 6.77755568246716 |                   | 0.799667843055844  |
| 5          | 108 | histone acetylation                                   |                  |                   |                    |
| GO:0018393 |     | 0.00133927048885431                                   | 6.64752567693744 |                   | 0.814476506816137  |
| 5          | 110 | internal peptidyl-lysine acetylation                  |                  |                   |                    |
| GO:0022613 |     | 0.00141082096378194                                   | 4.53587155963303 |                   | 1.66597467303301   |
| 7          | 225 | ribonucleoprotein complex biogenesis                  |                  |                   |                    |
| GO:0018394 |     | 0.00150933750578905                                   | 6.46151053013798 |                   | 0.836689502456577  |
| 5          | 113 | peptidyl-lysine acetylation                           |                  |                   |                    |
| GO:0006475 |     | 0.00163122169908091                                   | 6.34313725490196 |                   | 0.851498166216871  |
| 5          | 115 | internal protein amino acid acetylation               |                  |                   |                    |
| GO:0048285 |     | 0.00169383049192516                                   | 3.55721069591271 |                   | 2.73960279565428   |
| 9          | 370 | organelle fission                                     |                  |                   |                    |
| GO:0006405 |     | 0.0016973727916986                                    | 8.531142643764   | 0.510898899730122 | 4                  |
| 69         |     | RNA export from nucleus                               |                  |                   |                    |
| GO:0045931 |     | 0.00183206250357425                                   | 13.7634615384615 |                   | 0.244342952044841  |
| 3          | 33  | positive regulation of mitotic cell cycle             |                  |                   |                    |
| GO:0071843 |     | 0.00199011420128346                                   | 4.25793103448276 |                   | 1.76963531935506   |
| 7          | 239 | cellular component biogenesis at cellular level       |                  |                   |                    |
| GO:0051085 |     | 0.00235123801475254                                   | 34.1333333333333 |                   | 0.074043318801467  |
| 2          | 10  | chaperone mediated protein folding requiring cofactor |                  |                   |                    |
| GO:0044419 |     | 0.00259200549074806                                   | 3.32973760932945 |                   | 2.9173067607778    |
| 394        |     | interspecies interaction between organisms            |                  |                   |                    |
| GO:0006473 |     | 0.00260718603424917                                   | 5.66754344014028 |                   | 0.947754480658778  |
| 5          | 128 | protein acetylation                                   |                  |                   |                    |
| GO:0051169 |     | 0.00263737072435057                                   | 3.62242230612838 |                   | 2.37679053352709   |
| 8          | 321 | nuclear transport                                     |                  |                   |                    |
| GO:0050657 |     | 0.00269660187948411                                   | 5.62144212523719 |                   | 0.955158812538925  |
| 5          | 129 | nucleic acid transport                                |                  |                   |                    |
| GO:0050658 |     | 0.00269660187948411                                   | 5.62144212523719 |                   | 0.955158812538925  |
| 5          | 129 | RNA transport                                         |                  |                   |                    |
| GO:0051236 |     | 0.00269660187948411                                   | 5.62144212523719 |                   | 0.955158812538925  |
| 5          | 129 | establishment of RNA localization                     |                  |                   |                    |

Stable4\_20PerPair

|                                                                |                                                          |                  |                          |
|----------------------------------------------------------------|----------------------------------------------------------|------------------|--------------------------|
| GO:0007064                                                     | 0.00285987547293078                                      | 30.3386243386243 | 0.0814476506816137       |
| 2 11                                                           | mitotic sister chromatid cohesion                        |                  |                          |
| GO:0006403                                                     | 0.00338597480719715                                      | 5.31844035324053 | 1.00698913569995         |
| 5 136                                                          | RNA localization                                         |                  |                          |
| GO:0018205                                                     | 0.00395043290127815                                      | 5.12110726643599 | 1.04401079510069         |
| 5 141                                                          | peptidyl-lysine modification                             |                  |                          |
| GO:0043966                                                     | 0.00419286621707235                                      | 10.06308630394   | 0.325790602726455 3      |
| 44 histone                                                     | H3 acetylation                                           |                  |                          |
| GO:0043543                                                     | 0.00431979414912155                                      | 5.00952179432924 | 1.06622379074113         |
| 5 144                                                          | protein acylation                                        |                  |                          |
| GO:0045815                                                     | 0.00466373673300363                                      | 22.7492063492064 | 0.103660646322054        |
| 2 14                                                           | positive regulation of gene expression, epigenetic       |                  |                          |
| GO:0051084                                                     | 0.0047547071160943                                       | 9.59369409660107 | 0.340599266486748        |
| 3 46                                                           | 'de novo' posttranslational protein folding              |                  |                          |
| GO:0015931                                                     | 0.00513145534617908                                      | 4.80020283975659 | 1.11064978202201         |
| 5 150                                                          | nucleobase-containing compound transport                 |                  |                          |
| GO:0000070                                                     | 0.00567913236572984                                      | 8.96613712374582 | 0.362812262127188        |
| 3 49                                                           | mitotic sister chromatid segregation                     |                  |                          |
| GO:0010458                                                     | 0.00609095393581712                                      | 19.4965986394558 | 0.118469310082347        |
| 2 16                                                           | exit from mitosis                                        |                  |                          |
| GO:0030518                                                     | 0.00669499024630151                                      | 5.70393354018617 | 0.747837519894817        |
| 4 101                                                          | intracellular steroid hormone receptor signaling pathway |                  |                          |
| GO:0000819                                                     | 0.00670414535134251                                      | 8.41542386185243 | 0.385025257767629        |
| 3 52                                                           | sister chromatid segregation                             |                  |                          |
| GO:0006302                                                     | 0.00692927868272914                                      | 5.64533386170002 | 0.755241851774964        |
| 4 102                                                          | double-strand break repair                               |                  |                          |
| GO:0007346                                                     | 0.00727626059367854                                      | 3.32216216216216 | 2.24351255968445         |
| 7 303                                                          | regulation of mitotic cell cycle                         |                  |                          |
| GO:0006281                                                     | 0.00755558402172471                                      | 3.01015488215488 | 2.83585911009619         |
| 8 383                                                          | DNA repair                                               |                  |                          |
| GO:0051168                                                     | 0.00872236616921661                                      | 5.26638927415626 | 0.807072174935991        |
| 4 109                                                          | nuclear export                                           |                  |                          |
| GO:0071478                                                     | 0.00906605014910685                                      | 7.49423076923077 | 0.429451249048509        |
| 3 58                                                           | cellular response to radiation                           |                  |                          |
| GO:0051028                                                     | 0.00928533524098818                                      | 5.16722620451865 | 0.821880838696284        |
| 4 111                                                          | mRNA transport                                           |                  |                          |
| GO:0006913                                                     | 0.00936147059222981                                      | 3.15855305466238 | 2.35457753788665         |
| 7 318                                                          | nucleocytoplasmic transport                              |                  |                          |
| GO:0016571                                                     | 0.00950107513571365                                      | 7.35989010989011 | 0.436855580928655        |
| 3 59                                                           | histone methylation                                      |                  |                          |
| GO:0006406                                                     | 0.00994811026184323                                      | 7.23026315789474 | 0.444259912808802        |
| 3 60                                                           | mRNA export from nucleus                                 |                  |                          |
| Tissue: whole_Blood=>Thyroid                                   | Type: cluster                                            |                  |                          |
| SourceGene:                                                    | TMEM64(ENSG00000180694.9)                                |                  |                          |
| TargetGeneSet:                                                 | FCRL3 RP11 FCRL2 IGKJ5 IGKC IGKJ4 IGKJ3 IGKJ2            |                  |                          |
| IGKV1-6 IGKV3-7 IGKV1-9 IGKV1-13                               | IGKV1-17                                                 | IGKV2-26         | IGKV1-27                 |
| IGKV2-28                                                       | IGKV2-29                                                 | IGKV1-33         | IGKV1-39                 |
| IGKV1D-33                                                      | IGKV2D-29                                                | IGKV2D-28        | IGKV3D-20                |
| IGKV1D-13                                                      | IGKV3D-7                                                 | IGJ CTD          | CTB DNAH8                |
| CENPP RIN1                                                     | AMOTL1 GS1                                               | IGHG3 KIAA0125   | IGHV1-3 IGHV4-4 IGHV3-13 |
| IGHV1-18                                                       | IGHV4-28                                                 | IGHV4-31         | IGHV3-33                 |
| IGHV1-46                                                       | IGHV5-51                                                 | IGHV4-55         | IGHV2-70                 |
| IGHV3-74                                                       | IGHV5-78                                                 | DOC2B TNFRSF13B  | CD79A LINC00176          |
| PPM1F IGLV9-49                                                 | IGLV1-47                                                 | IGLV5-45         | IGLV1-40                 |
| IGLV3-21                                                       | IGLV3-1 IGLL5                                            | IGLC1            | IGLC7                    |
| GOBPID Pvalue                                                  | OddsRatio                                                | ExpCount         | Count                    |
| GO:0006958                                                     | 4.17272448412705e-17                                     | 210.526829268293 | 0.0830392360390284       |
| 9 50                                                           | complement activation, classical pathway                 |                  |                          |
| GO:0006956                                                     | 3.89403027699151e-16                                     | 159.7            | 0.104629437409176 9 63   |
| complement activation                                          |                                                          |                  |                          |
| GO:0002455                                                     | 5.24961254567502e-16                                     | 153.975          | 0.107951006850737 9 65   |
| humoral immune response mediated by circulating immunoglobulin |                                                          |                  |                          |
| GO:0072376                                                     | 4.73636565626121e-15                                     | 117.978082191781 | 0.136184347104007        |

Stable4\_20PerPair

|                                                       |     |                                                                                                                           |                  |                     |                     |     |
|-------------------------------------------------------|-----|---------------------------------------------------------------------------------------------------------------------------|------------------|---------------------|---------------------|-----|
| 9                                                     | 82  | protein activation cascade                                                                                                |                  |                     |                     |     |
| GO:0016064                                            |     | 7.94729347232045e-14                                                                                                      | 84.2647058823529 |                     | 0.184347104006643   |     |
| 9                                                     | 111 | immunoglobulin mediated immune response                                                                                   |                  |                     |                     |     |
| GO:0019724                                            |     | 1.01656580271012e-13                                                                                                      | 81.84            | 0.189329458168985   | 9                   | 114 |
| B cell mediated immunity                              |     |                                                                                                                           |                  |                     |                     |     |
| GO:0006959                                            |     | 1.89850781575545e-13                                                                                                      | 76.0035398230089 |                     | 0.202615735935229   |     |
| 9                                                     | 122 | humoral immune response                                                                                                   |                  |                     |                     |     |
| GO:0002449                                            |     | 3.33579003599497e-12                                                                                                      | 54.1860759493671 |                     | 0.277351048370355   |     |
| 9                                                     | 167 | lymphocyte mediated immunity                                                                                              |                  |                     |                     |     |
| GO:0002460                                            |     | 6.91206296908552e-12                                                                                                      | 49.7267441860465 |                     | 0.300602034461283   |     |
| 9                                                     | 181 | adaptive immune response based on somatic recombination of immune receptors built from immunoglobulin superfamily domains |                  |                     |                     |     |
| GO:0002250                                            |     | 1.55296624225031e-11                                                                                                      | 45.2             | 0.328835374714553   | 9                   | 198 |
| adaptive immune response                              |     |                                                                                                                           |                  |                     |                     |     |
| GO:0002253                                            |     | 1.87926130523349e-11                                                                                                      | 34.9431537320811 |                     | 0.49657463151339    |     |
| 10                                                    | 299 | activation of immune response                                                                                             |                  |                     |                     |     |
| GO:0002443                                            |     | 2.75033885290613e-11                                                                                                      | 42.2524752475247 |                     | 0.3504255760847     | 9   |
| 211                                                   |     | leukocyte mediated immunity                                                                                               |                  |                     |                     |     |
| GO:0050778                                            |     | 1.3027059467683e-10                                                                                                       | 28.3958837772397 |                     | 0.604525638364127   |     |
| 10                                                    | 364 | positive regulation of immune response                                                                                    |                  |                     |                     |     |
| GO:0002252                                            |     | 5.78430500835518e-09                                                                                                      | 22.3607427055703 |                     | 0.6410629022213     | 9   |
| 386                                                   |     | immune effector process                                                                                                   |                  |                     |                     |     |
| GO:0051496                                            |     | 0.000838456291624716                                                                                                      | 54.5568181818182 |                     | 0.0431804027402948  |     |
| 2                                                     | 26  | positive regulation of stress fiber assembly                                                                              |                  |                     |                     |     |
| GO:0032233                                            |     | 0.0011177006176441                                                                                                        | 46.75            | 0.0498235416234171  | 2                   | 30  |
| positive regulation of actin filament bundle assembly |     |                                                                                                                           |                  |                     |                     |     |
| GO:0051492                                            |     | 0.00169914447007782                                                                                                       | 37.3818181818182 |                     | 0.061449034668881   |     |
| 2                                                     | 37  | regulation of stress fiber assembly                                                                                       |                  |                     |                     |     |
| GO:0032231                                            |     | 0.00228983935999548                                                                                                       | 31.8980044345898 |                     | 0.0714137429935645  |     |
| 2                                                     | 43  | regulation of actin filament bundle assembly                                                                              |                  |                     |                     |     |
| GO:0043149                                            |     | 0.00239645191615069                                                                                                       | 31.1363636363636 |                     | 0.073074527714345   |     |
| 2                                                     | 44  | stress fiber assembly                                                                                                     |                  |                     |                     |     |
| GO:0010638                                            |     | 0.00332423105454637                                                                                                       | 11.3071428571429 |                     | 0.303923603902844   |     |
| 3                                                     | 183 | positive regulation of organelle organization                                                                             |                  |                     |                     |     |
| GO:0042100                                            |     | 0.00399022793096356                                                                                                       | 23.7553719008264 |                     | 0.0946647290844924  |     |
| 2                                                     | 57  | B cell proliferation                                                                                                      |                  |                     |                     |     |
| GO:0031585                                            |     | 0.00497442779656243                                                                                                       | 313.586956521739 |                     | 0.00498235416234171 |     |
| 1                                                     | 3   | regulation of inositol 1,4,5-trisphosphate-sensitive calcium-release channel activity                                     |                  |                     |                     |     |
| GO:0031987                                            |     | 0.00497442779656243                                                                                                       | 313.586956521739 |                     | 0.00498235416234171 |     |
| 1                                                     | 3   | locomotion involved in locomotory behavior                                                                                |                  |                     |                     |     |
| GO:0048791                                            |     | 0.00497442779656243                                                                                                       | 313.586956521739 |                     | 0.00498235416234171 |     |
| 1                                                     | 3   | calcium ion-dependent exocytosis of neurotransmitter                                                                      |                  |                     |                     |     |
| GO:0051643                                            |     | 0.00497442779656243                                                                                                       | 313.586956521739 |                     | 0.00498235416234171 |     |
| 1                                                     | 3   | endoplasmic reticulum localization                                                                                        |                  |                     |                     |     |
| GO:0042552                                            |     | 0.00563234430661618                                                                                                       | 19.7809917355372 |                     | 0.112933361013079   |     |
| 2                                                     | 68  | myelination                                                                                                               |                  |                     |                     |     |
| GO:0051017                                            |     | 0.00579461598130192                                                                                                       | 19.4843962008141 |                     | 0.114594145733859   |     |
| 2                                                     | 69  | actin filament bundle assembly                                                                                            |                  |                     |                     |     |
| GO:0007272                                            |     | 0.00629421014504686                                                                                                       | 18.6454545454545 |                     | 0.119576499896201   |     |
| 2                                                     | 72  | ensheathment of neurons                                                                                                   |                  |                     |                     |     |
| GO:0008366                                            |     | 0.00629421014504686                                                                                                       | 18.6454545454545 |                     | 0.119576499896201   |     |
| 2                                                     | 72  | axon ensheathment                                                                                                         |                  |                     |                     |     |
| GO:0009313                                            |     | 0.0066272941955714                                                                                                        | 209.04347826087  | 0.00664313888312228 |                     | 1   |
| 4                                                     |     | oligosaccharide catabolic process                                                                                         |                  |                     |                     |     |
| GO:0031340                                            |     | 0.0066272941955714                                                                                                        | 209.04347826087  | 0.00664313888312228 |                     | 1   |
| 4                                                     |     | positive regulation of vesicle fusion                                                                                     |                  |                     |                     |     |
| GO:0042759                                            |     | 0.0066272941955714                                                                                                        | 209.04347826087  | 0.00664313888312228 |                     | 1   |
| 4                                                     |     | long-chain fatty acid biosynthetic process                                                                                |                  |                     |                     |     |
| GO:0019228                                            |     | 0.0084809763532936                                                                                                        | 15.9035476718404 |                     | 0.139505916545568   |     |
| 2                                                     | 84  | regulation of action potential in neuron                                                                                  |                  |                     |                     |     |
| GO:0051495                                            |     | 0.00927550456992079                                                                                                       | 15.1596194503171 |                     | 0.14614905542869    |     |
| 2                                                     | 88  | positive regulation of cytoskeleton organization                                                                          |                  |                     |                     |     |

Stable4\_20PerPair

| GO:ID                                              | Pvalue               | OddsRatio                                         | ExpCount         | Count            | Size   | Term                     |
|----------------------------------------------------|----------------------|---------------------------------------------------|------------------|------------------|--------|--------------------------|
| GO:0000244                                         | 0.00992513678201701  |                                                   |                  | 125.408695652174 |        | 0.00996470832468341      |
| 1                                                  | 6                    | assembly of spliceosomal tri-snRNP                |                  |                  |        |                          |
| Tissue: whole_Blood=>Nerve_Tibial Type: asymmetric |                      |                                                   |                  |                  |        |                          |
| SourceGene: CTD-2313J17.1(ENSG00000258922.1)       |                      |                                                   |                  |                  |        |                          |
| TargetGeneSet:                                     | CHCHD2P6             | HSPB7                                             | CCT8P1           | RP11             | CHRNA2 | DPT ACVR1C               |
| KRT8P15                                            | GPBAR1               | DES                                               | SLC19A3          | TIMP4            | ADIPOQ | ADIPOQ-AS1 LVRN PPARGC1B |
| MLXIPL                                             | AQP9                 | LRRC37A5P                                         | AGPAT2           | C10orf71         |        | RBP4 GPAM ACCL5          |
| LGALS12                                            | RPS3AP40             | MYEOV                                             | GPD1             | PPP1R1A          | ACACB  | MYH7 PLIN1 TUSC5         |
| STAT5A                                             | CA4                  | SCN4A                                             | CIDEA            | PLIN4            | PLIN5  | SLC7A10 LIPE FTCD-AS1    |
| SULT4A1                                            | GYG2                 | PFKFB1                                            |                  |                  |        |                          |
| GOBPID                                             | Pvalue               | OddsRatio                                         | ExpCount         | Count            | Size   | Term                     |
| GO:0006641                                         | 7.95965961852856e-08 |                                                   | 34.6038647342995 |                  |        | 0.223790741125182        |
| 6                                                  | 98                   | triglyceride metabolic process                    |                  |                  |        |                          |
| GO:0006639                                         | 1.07255759533129e-07 |                                                   | 32.8087056128293 |                  |        | 0.235208636080548        |
| 6                                                  | 103                  | acylglycerol metabolic process                    |                  |                  |        |                          |
| GO:0006638                                         | 1.13639611300147e-07 |                                                   | 32.4716553287982 |                  |        | 0.237492215071621        |
| 6                                                  | 104                  | neutral lipid metabolic process                   |                  |                  |        |                          |
| GO:0019216                                         | 2.24183935298213e-07 |                                                   | 20.4888934594817 |                  |        | 0.443014324268217        |
| 7                                                  | 194                  | regulation of lipid metabolic process             |                  |                  |        |                          |
| GO:0009749                                         | 4.26731426718578e-06 |                                                   | 24.8179611650485 |                  |        | 0.246626531035914        |
| 5                                                  | 108                  | response to glucose stimulus                      |                  |                  |        |                          |
| GO:0009746                                         | 5.33018893176607e-06 |                                                   | 23.6607142857143 |                  |        | 0.258044425991281        |
| 5                                                  | 113                  | response to hexose stimulus                       |                  |                  |        |                          |
| GO:0034284                                         | 5.80925195704711e-06 |                                                   | 23.2272727272727 |                  |        | 0.262611583973427        |
| 5                                                  | 115                  | response to monosaccharide stimulus               |                  |                  |        |                          |
| GO:0019432                                         | 6.09748631581001e-06 |                                                   | 40.4475721323012 |                  |        | 0.121029686526884        |
| 4                                                  | 53                   | triglyceride biosynthetic process                 |                  |                  |        |                          |
| GO:0046460                                         | 7.07899897634248e-06 |                                                   | 38.8559837728195 |                  |        | 0.125596844509031        |
| 4                                                  | 55                   | neutral lipid biosynthetic process                |                  |                  |        |                          |
| GO:0046463                                         | 7.07899897634248e-06 |                                                   | 38.8559837728195 |                  |        | 0.125596844509031        |
| 4                                                  | 55                   | acylglycerol biosynthetic process                 |                  |                  |        |                          |
| GO:0010876                                         | 8.00881384652893e-06 |                                                   | 15.1079213184476 |                  |        | 0.490969483080756        |
| 6                                                  | 215                  | lipid localization                                |                  |                  |        |                          |
| GO:0009743                                         | 1.13902959533377e-05 |                                                   | 20.0942069741282 |                  |        | 0.301432426821673        |
| 5                                                  | 132                  | response to carbohydrate stimulus                 |                  |                  |        |                          |
| GO:0043434                                         | 2.01369832473102e-05 |                                                   | 10.0821538461538 |                  |        | 0.872327174589994        |
| 7                                                  | 382                  | response to peptide hormone stimulus              |                  |                  |        |                          |
| GO:0046486                                         | 2.30751876697959e-05 |                                                   | 12.4418093983311 |                  |        | 0.59144695868798         |
| 6                                                  | 259                  | glycerolipid metabolic process                    |                  |                  |        |                          |
| GO:0006112                                         | 3.25040083304447e-05 |                                                   | 16.0141509433962 |                  |        | 0.374506954536018        |
| 5                                                  | 164                  | energy reserve metabolic process                  |                  |                  |        |                          |
| GO:0006091                                         | 4.17181105858948e-05 |                                                   | 8.95112369815458 |                  |        | 0.977371808179365        |
| 7                                                  | 428                  | generation of precursor metabolites and energy    |                  |                  |        |                          |
| GO:0006631                                         | 4.18734110600985e-05 |                                                   | 11.1394799054374 |                  |        | 0.657670749429105        |
| 6                                                  | 288                  | fatty acid metabolic process                      |                  |                  |        |                          |
| GO:0045834                                         | 5.46501790211906e-05 |                                                   | 22.4608150470219 |                  |        | 0.210089267178742        |
| 4                                                  | 92                   | positive regulation of lipid metabolic process    |                  |                  |        |                          |
| GO:0044262                                         | 7.06567202148421e-05 |                                                   | 13.5163373860182 |                  |        | 0.440730745277143        |
| 5                                                  | 193                  | cellular carbohydrate metabolic process           |                  |                  |        |                          |
| GO:0006006                                         | 7.97540034018014e-05 |                                                   | 13.1615470022206 |                  |        | 0.45214864023251         |
| 5                                                  | 198                  | glucose metabolic process                         |                  |                  |        |                          |
| GO:0046889                                         | 0.00013480857295596  |                                                   | 35.0658536585366 |                  |        | 0.100477475607224        |
| 3                                                  | 44                   | positive regulation of lipid biosynthetic process |                  |                  |        |                          |
| GO:0019318                                         | 0.00017482274792078  |                                                   | 11.0644104803493 |                  |        | 0.534357483911148        |
| 5                                                  | 234                  | hexose metabolic process                          |                  |                  |        |                          |
| GO:0009744                                         | 0.000180239911948168 |                                                   | 132.820276497696 |                  |        | 0.0205522109196595       |
| 2                                                  | 9                    | response to sucrose stimulus                      |                  |                  |        |                          |
| GO:0034285                                         | 0.000180239911948168 |                                                   | 132.820276497696 |                  |        | 0.0205522109196595       |
| 2                                                  | 9                    | response to disaccharide stimulus                 |                  |                  |        |                          |
| GO:0055089                                         | 0.000180239911948168 |                                                   | 132.820276497696 |                  |        | 0.0205522109196595       |
| 2                                                  | 9                    | fatty acid homeostasis                            |                  |                  |        |                          |
| GO:0019915                                         | 0.000186082374057382 |                                                   | 31.2434782608696 |                  |        | 0.111895370562591        |
| 3                                                  | 49                   | lipid storage                                     |                  |                  |        |                          |

Stable4\_20PerPair

|                                                       |                      |                                                          |                    |   |     |
|-------------------------------------------------------|----------------------|----------------------------------------------------------|--------------------|---|-----|
| GO:0010867                                            | 0.00022497792689792  | 116.209677419355                                         | 0.0228357899107328 |   |     |
| 2                                                     | 10                   | positive regulation of triglyceride biosynthetic process |                    |   |     |
| GO:0032868                                            | 0.000246715170641447 | 10.2450838635049                                         | 0.575461905750467  |   |     |
| 5                                                     | 252                  | response to insulin stimulus                             |                    |   |     |
| GO:0032787                                            | 0.000257958470179801 | 7.88917018284107                                         | 0.915715175420386  |   |     |
| 6                                                     | 401                  | monocarboxylic acid metabolic process                    |                    |   |     |
| GO:0005996                                            | 0.000260608018732448 | 10.12                                                    | 0.582312642723687  | 5 | 255 |
| monosaccharide metabolic process                      |                      |                                                          |                    |   |     |
| GO:0033032                                            | 0.000274580123993068 | 103.290322580645                                         | 0.0251193689018061 |   |     |
| 2                                                     | 11                   | regulation of myeloid cell apoptotic process             |                    |   |     |
| GO:0006094                                            | 0.000307315513526828 | 26.1145454545455                                         | 0.13244758148225   |   |     |
| 3                                                     | 58                   | gluconeogenesis                                          |                    |   |     |
| GO:0016024                                            | 0.000329025405415394 | 92.9548387096774                                         | 0.0274029478928794 |   |     |
| 2                                                     | 12                   | CDP-diacylglycerol biosynthetic process                  |                    |   |     |
| GO:0019319                                            | 0.000374340354630484 | 24.3372881355932                                         | 0.141581897446543  |   |     |
| 3                                                     | 62                   | hexose biosynthetic process                              |                    |   |     |
| GO:0033028                                            | 0.000388292739320376 | 84.4985337243402                                         | 0.0296865268839527 |   |     |
| 2                                                     | 13                   | myeloid cell apoptotic process                           |                    |   |     |
| GO:0046341                                            | 0.000388292739320376 | 84.4985337243402                                         | 0.0296865268839527 |   |     |
| 2                                                     | 13                   | CDP-diacylglycerol metabolic process                     |                    |   |     |
| GO:0045017                                            | 0.000418976347448355 | 12.94555353902                                           | 0.356238322607432  | 4 |     |
| 156                                                   |                      | glycerolipid biosynthetic process                        |                    |   |     |
| GO:0040014                                            | 0.000430331682137595 | 23.1548387096774                                         | 0.148432634419763  |   |     |
| 3                                                     | 65                   | regulation of multicellular organism growth              |                    |   |     |
| GO:0046364                                            | 0.000450123790556485 | 22.7857142857143                                         | 0.150716213410837  |   |     |
| 3                                                     | 66                   | monosaccharide biosynthetic process                      |                    |   |     |
| GO:0010866                                            | 0.000452361159660209 | 77.4516129032258                                         | 0.031970105875026  |   |     |
| 2                                                     | 14                   | regulation of triglyceride biosynthetic process          |                    |   |     |
| GO:0070293                                            | 0.000452361159660209 | 77.4516129032258                                         | 0.031970105875026  |   |     |
| 2                                                     | 14                   | renal absorption                                         |                    |   |     |
| GO:0003014                                            | 0.000470491835915483 | 22.428125                                                | 0.15299979240191   | 3 |     |
| 67                                                    |                      | renal system process                                     |                    |   |     |
| GO:0010906                                            | 0.000470491835915483 | 22.428125                                                | 0.15299979240191   | 3 |     |
| 67                                                    |                      | regulation of glucose metabolic process                  |                    |   |     |
| GO:0019217                                            | 0.000470491835915483 | 22.428125                                                | 0.15299979240191   | 3 |     |
| 67                                                    |                      | regulation of fatty acid metabolic process               |                    |   |     |
| GO:0051240                                            | 0.000506655532519243 | 6.91363523880228                                         | 1.03902844093834   |   |     |
| 6                                                     | 455                  | positive regulation of multicellular organismal process  |                    |   |     |
| GO:0090208                                            | 0.000594817723377894 | 66.3778801843318                                         | 0.0365372638571725 |   |     |
| 2                                                     | 16                   | positive regulation of triglyceride metabolic process    |                    |   |     |
| GO:0002761                                            | 0.000605182306922169 | 20.4971428571429                                         | 0.16670126634835   |   |     |
| 3                                                     | 73                   | regulation of myeloid leukocyte differentiation          |                    |   |     |
| GO:0015980                                            | 0.000609943471952853 | 8.34673604541154                                         | 0.701058750259498  |   |     |
| 5                                                     | 307                  | energy derivation by oxidation of organic compounds      |                    |   |     |
| GO:0016051                                            | 0.000718327161609398 | 11.1614420062696                                         | 0.411044218393191  |   |     |
| 4                                                     | 180                  | carbohydrate biosynthetic process                        |                    |   |     |
| GO:0042104                                            | 0.000756228677422032 | 58.0725806451613                                         | 0.0411044218393191 |   |     |
| 2                                                     | 18                   | positive regulation of activated T cell proliferation    |                    |   |     |
| GO:0010675                                            | 0.000880251032037665 | 17.9225                                                  | 0.189537056259082  | 3 | 83  |
| regulation of cellular carbohydrate metabolic process |                      |                                                          |                    |   |     |
| GO:0042493                                            | 0.000916446693937499 | 7.59980578334053                                         | 0.767282541000623  |   |     |
| 5                                                     | 336                  | response to drug                                         |                    |   |     |
| GO:0006109                                            | 0.00100918327127551  | 17.0642857142857                                         | 0.198671372223376  |   |     |
| 3                                                     | 87                   | regulation of carbohydrate metabolic process             |                    |   |     |
| GO:0090207                                            | 0.00113525328177882  | 46.4451612903226                                         | 0.0502387378036122 |   |     |
| 2                                                     | 22                   | regulation of triglyceride metabolic process             |                    |   |     |
| GO:0031667                                            | 0.0011718462077691   | 7.17755102040816                                         | 0.810670541831015  |   |     |
| 5                                                     | 355                  | response to nutrient levels                              |                    |   |     |
| GO:0006732                                            | 0.00118699078097754  | 9.70706725844998                                         | 0.470417272161096  |   |     |
| 4                                                     | 206                  | coenzyme metabolic process                               |                    |   |     |
| GO:0046890                                            | 0.00122405919835558  | 15.92                                                    | 0.212372846169815  | 3 | 93  |
| regulation of lipid biosynthetic process              |                      |                                                          |                    |   |     |
| GO:0001817                                            | 0.00123174727611219  | 7.09443099273608                                         | 0.819804857795308  |   |     |



Stable4\_20PerPair

|            |     |                                                          |                  |                    |   |
|------------|-----|----------------------------------------------------------|------------------|--------------------|---|
| 5          | 359 | regulation of cytokine production                        |                  |                    |   |
| GO:0019433 |     | 0.00124159877728433                                      | 44.2304147465438 | 0.0525223167946855 |   |
| 2          | 23  | triglyceride catabolic process                           |                  |                    |   |
| GO:0032370 |     | 0.00124159877728433                                      | 44.2304147465438 | 0.0525223167946855 |   |
| 2          | 23  | positive regulation of lipid transport                   |                  |                    |   |
| GO:0043029 |     | 0.00124159877728433                                      | 44.2304147465438 | 0.0525223167946855 |   |
| 2          | 23  | T cell homeostasis                                       |                  |                    |   |
| GO:0045471 |     | 0.00126245280254452                                      | 15.743956043956  | 0.214656425160889  | 3 |
| 94         |     | response to ethanol                                      |                  |                    |   |
| GO:0097305 |     | 0.00130159908001424                                      | 15.5717391304348 | 0.216940004151962  |   |
| 3          | 95  | response to alcohol                                      |                  |                    |   |
| GO:0008016 |     | 0.00134150364896893                                      | 15.4032258064516 | 0.219223583143035  |   |
| 3          | 96  | regulation of heart contraction                          |                  |                    |   |
| GO:0050671 |     | 0.00134150364896893                                      | 15.4032258064516 | 0.219223583143035  |   |
| 3          | 96  | positive regulation of lymphocyte proliferation          |                  |                    |   |
| GO:0046006 |     | 0.00135253927893591                                      | 42.217008797654  | 0.0548058957857588 | 2 |
| 24         |     | regulation of activated T cell proliferation             |                  |                    |   |
| GO:0046461 |     | 0.00135253927893591                                      | 42.217008797654  | 0.0548058957857588 | 2 |
| 24         |     | neutral lipid catabolic process                          |                  |                    |   |
| GO:0046464 |     | 0.00135253927893591                                      | 42.217008797654  | 0.0548058957857588 | 2 |
| 24         |     | acylglycerol catabolic process                           |                  |                    |   |
| GO:0032946 |     | 0.00138217208181276                                      | 15.2382978723404 | 0.221507162134108  |   |
| 3          | 97  | positive regulation of mononuclear cell proliferation    |                  |                    |   |
| GO:0070665 |     | 0.00150881560490668                                      | 14.7639175257732 | 0.228357899107328  |   |
| 3          | 100 | positive regulation of leukocyte proliferation           |                  |                    |   |
| GO:0009991 |     | 0.00154789068584402                                      | 6.7239563385676  | 0.863192858625701  | 5 |
| 378        |     | response to extracellular stimulus                       |                  |                    |   |
| GO:0040018 |     | 0.00158812434901315                                      | 38.6935483870968 | 0.0593730537679053 |   |
| 2          | 26  | positive regulation of multicellular organism growth     |                  |                    |   |
| GO:0050798 |     | 0.00158812434901315                                      | 38.6935483870968 | 0.0593730537679053 |   |
| 2          | 26  | activated T cell proliferation                           |                  |                    |   |
| GO:0045923 |     | 0.0017127286007007                                       | 37.1432258064516 | 0.0616566327589786 |   |
| 2          | 27  | positive regulation of fatty acid metabolic process      |                  |                    |   |
| GO:0032844 |     | 0.00172440672777148                                      | 8.74014778325123 | 0.520656009964708  |   |
| 4          | 228 | regulation of homeostatic process                        |                  |                    |   |
| GO:0032720 |     | 0.00184184722471557                                      | 35.712158808933  | 0.0639402117500519 | 2 |
| 28         |     | negative regulation of tumor necrosis factor production  |                  |                    |   |
| GO:0033865 |     | 0.00184184722471557                                      | 35.712158808933  | 0.0639402117500519 | 2 |
| 28         |     | nucleoside bisphosphate metabolic process                |                  |                    |   |
| GO:0001816 |     | 0.00187841568405204                                      | 6.42307692307692 | 0.902013701473946  |   |
| 5          | 395 | cytokine production                                      |                  |                    |   |
| GO:0006936 |     | 0.00204818652604451                                      | 8.32457813646368 | 0.545775378866514  |   |
| 4          | 239 | muscle contraction                                       |                  |                    |   |
| GO:0051048 |     | 0.00208751363034533                                      | 13.1275229357798 | 0.255760847000208  |   |
| 3          | 112 | negative regulation of secretion                         |                  |                    |   |
| GO:0016042 |     | 0.00214332846222422                                      | 8.21790785279629 | 0.552626115839734  |   |
| 4          | 242 | lipid catabolic process                                  |                  |                    |   |
| GO:0051186 |     | 0.00224149476476971                                      | 8.11389326083846 | 0.559476852812954  |   |
| 4          | 245 | cofactor metabolic process                               |                  |                    |   |
| GO:0051046 |     | 0.002282237447148                                        | 6.13182773109244 | 0.943118123313265  |   |
| 5          | 413 | regulation of secretion                                  |                  |                    |   |
| GO:0003015 |     | 0.00230708936296899                                      | 12.6592920353982 | 0.264895162964501  |   |
| 3          | 116 | heart process                                            |                  |                    |   |
| GO:0060047 |     | 0.00230708936296899                                      | 12.6592920353982 | 0.264895162964501  |   |
| 3          | 116 | heart contraction                                        |                  |                    |   |
| GO:0044057 |     | 0.00237998888247377                                      | 6.07056171983356 | 0.952252439277559  |   |
| 5          | 417 | regulation of system process                             |                  |                    |   |
| GO:0046503 |     | 0.00240306638746981                                      | 30.941935483871  | 0.073074527714345  | 2 |
| 32         |     | glycerolipid catabolic process                           |                  |                    |   |
| GO:0045637 |     | 0.00242205427147634                                      | 12.4373913043478 | 0.269462320946647  |   |
| 3          | 118 | regulation of myeloid cell differentiation               |                  |                    |   |
| GO:0002763 |     | 0.00271024518725041                                      | 29.0040322580645 | 0.0776416856964916 |   |
| 2          | 34  | positive regulation of myeloid leukocyte differentiation |                  |                    |   |

Stable4\_20PerPair

|            |                                                     |                  |                         |
|------------|-----------------------------------------------------|------------------|-------------------------|
| GO:0002573 | 0.00285223938865716                                 | 11.7180327868852 | 0.28544737388416        |
| 3 125      | myeloid leukocyte differentiation                   |                  |                         |
| GO:0003012 | 0.00301746110844096                                 | 7.45248749670966 | 0.607432011625493       |
| 4 266      | muscle system process                               |                  |                         |
| GO:0051384 | 0.00339833948917098                                 | 10.9907692307692 | 0.303716005812747       |
| 3 133      | response to glucocorticoid stimulus                 |                  |                         |
| GO:0071375 | 0.0034896220308333                                  | 7.14664645699128 | 0.632551380527299       |
| 4 277      | cellular response to peptide hormone stimulus       |                  |                         |
| GO:0015909 | 0.00355442549303487                                 | 25.075850043592  | 0.089059580651858 2     |
| 39         | long-chain fatty acid transport                     |                  |                         |
| GO:0030049 | 0.00355442549303487                                 | 25.075850043592  | 0.089059580651858 2     |
| 39         | muscle filament sliding                             |                  |                         |
| GO:0033275 | 0.00355442549303487                                 | 25.075850043592  | 0.089059580651858 2     |
| 39         | actin-myosin filament sliding                       |                  |                         |
| GO:0044242 | 0.00369380886083433                                 | 10.6597014925373 | 0.31285032177704        |
| 3 137      | cellular lipid catabolic process                    |                  |                         |
| GO:0002260 | 0.00373617448509086                                 | 24.4142614601019 | 0.0913431596429313      |
| 2 40       | lymphocyte homeostasis                              |                  |                         |
| GO:0006637 | 0.00373617448509086                                 | 24.4142614601019 | 0.0913431596429313      |
| 2 40       | acyl-CoA metabolic process                          |                  |                         |
| GO:0035383 | 0.00373617448509086                                 | 24.4142614601019 | 0.0913431596429313      |
| 2 40       | thioester metabolic process                         |                  |                         |
| GO:0007565 | 0.00392542749391757                                 | 10.4240875912409 | 0.31970105875026        |
| 3 140      | female pregnancy                                    |                  |                         |
| GO:0031960 | 0.00408466676056487                                 | 10.2726618705036 | 0.324268216732406       |
| 3 142      | response to corticosteroid stimulus                 |                  |                         |
| GO:0070252 | 0.00411243099306515                                 | 23.1903225806452 | 0.0959103176250778      |
| 2 42       | actin-mediated cell contraction                     |                  |                         |
| GO:0050670 | 0.00424780202510783                                 | 10.1255319148936 | 0.328835374714553       |
| 3 144      | regulation of lymphocyte proliferation              |                  |                         |
| GO:0046888 | 0.00430690018207738                                 | 22.6231313926043 | 0.0981938966161511      |
| 2 43       | negative regulation of hormone secretion            |                  |                         |
| GO:0032944 | 0.00433083971768706                                 | 10.0535211267606 | 0.331118953705626       |
| 3 145      | regulation of mononuclear cell proliferation        |                  |                         |
| GO:0048871 | 0.00433083971768706                                 | 10.0535211267606 | 0.331118953705626       |
| 3 145      | multicellular organismal homeostasis                |                  |                         |
| GO:0032623 | 0.00450557121108316                                 | 22.0829493087558 | 0.100477475607224       |
| 2 44       | interleukin-2 production                            |                  |                         |
| GO:0070663 | 0.00476087008678795                                 | 9.70816326530612 | 0.342536848660992       |
| 3 150      | regulation of leukocyte proliferation               |                  |                         |
| GO:0008015 | 0.00480145424207656                                 | 6.51320493599354 | 0.691924434295204       |
| 4 303      | blood circulation                                   |                  |                         |
| GO:0048545 | 0.00480145424207656                                 | 6.51320493599354 | 0.691924434295204       |
| 4 303      | response to steroid hormone stimulus                |                  |                         |
| GO:0003013 | 0.00485769549577889                                 | 6.49103448275862 | 0.694208013286278       |
| 4 304      | circulatory system process                          |                  |                         |
| GO:0010565 | 0.0051229100949274                                  | 9.44834437086093 | 0.351671164625285       |
| 3 154      | regulation of cellular ketone metabolic process     |                  |                         |
| GO:0015850 | 0.00534189439482383                                 | 20.1570827489481 | 0.109611791571518       |
| 2 48       | organic alcohol transport                           |                  |                         |
| GO:0016052 | 0.00550119277722173                                 | 9.20193548387097 | 0.360805480589579       |
| 3 158      | carbohydrate catabolic process                      |                  |                         |
| GO:0001776 | 0.00556129065102666                                 | 19.7268359643102 | 0.111895370562591       |
| 2 49       | leukocyte homeostasis                               |                  |                         |
| GO:0015908 | 0.00647957616206189                                 | 18.1745730550285 | 0.121029686526884       |
| 2 53       | fatty acid transport                                |                  |                         |
| GO:0044275 | 0.00671922984530893                                 | 17.8238213399504 | 0.123313265517957       |
| 2 54       | cellular carbohydrate catabolic process             |                  |                         |
| GO:0045638 | 0.00671922984530893                                 | 17.8238213399504 | 0.123313265517957       |
| 2 54       | negative regulation of myeloid cell differentiation |                  |                         |
| GO:0050871 | 0.00671922984530893                                 | 17.8238213399504 | 0.123313265517957       |
| 2 54       | positive regulation of B cell activation            |                  |                         |
| GO:0009756 | 0.00683557664080414                                 | 225.25           | 0.00685073697321985 1 3 |

STable4\_20PerPair

|                                                                                       |                     |                                                     |                     |                   |     |
|---------------------------------------------------------------------------------------|---------------------|-----------------------------------------------------|---------------------|-------------------|-----|
| carbohydrate mediated signaling                                                       |                     |                                                     |                     |                   |     |
| GO:0015825                                                                            | 0.00683557664080414 | 225.25                                              | 0.00685073697321985 | 1                 | 3   |
| L-serine transport                                                                    |                     |                                                     |                     |                   |     |
| GO:0021562                                                                            | 0.00683557664080414 | 225.25                                              | 0.00685073697321985 | 1                 | 3   |
| vestibulocochlear nerve development                                                   |                     |                                                     |                     |                   |     |
| GO:0032226                                                                            | 0.00683557664080414 | 225.25                                              | 0.00685073697321985 | 1                 | 3   |
| positive regulation of synaptic transmission, dopaminergic                            |                     |                                                     |                     |                   |     |
| GO:0033026                                                                            | 0.00683557664080414 | 225.25                                              | 0.00685073697321985 | 1                 | 3   |
| negative regulation of mast cell apoptotic process                                    |                     |                                                     |                     |                   |     |
| GO:0033034                                                                            | 0.00683557664080414 | 225.25                                              | 0.00685073697321985 | 1                 | 3   |
| positive regulation of myeloid cell apoptotic process                                 |                     |                                                     |                     |                   |     |
| GO:0033211                                                                            | 0.00683557664080414 | 225.25                                              | 0.00685073697321985 | 1                 | 3   |
| adiponectin-mediated signaling pathway                                                |                     |                                                     |                     |                   |     |
| GO:0045715                                                                            | 0.00683557664080414 | 225.25                                              | 0.00685073697321985 | 1                 | 3   |
| negative regulation of low-density lipoprotein particle receptor biosynthetic process |                     |                                                     |                     |                   |     |
| GO:0045759                                                                            | 0.00683557664080414 | 225.25                                              | 0.00685073697321985 | 1                 | 3   |
| negative regulation of action potential                                               |                     |                                                     |                     |                   |     |
| GO:0046544                                                                            | 0.00683557664080414 | 225.25                                              | 0.00685073697321985 | 1                 | 3   |
| development of secondary male sexual characteristics                                  |                     |                                                     |                     |                   |     |
| GO:0060084                                                                            | 0.00683557664080414 | 225.25                                              | 0.00685073697321985 | 1                 | 3   |
| synaptic transmission involved in micturition                                         |                     |                                                     |                     |                   |     |
| GO:0060375                                                                            | 0.00683557664080414 | 225.25                                              | 0.00685073697321985 | 1                 | 3   |
| regulation of mast cell differentiation                                               |                     |                                                     |                     |                   |     |
| GO:0070666                                                                            | 0.00683557664080414 | 225.25                                              | 0.00685073697321985 | 1                 | 3   |
| regulation of mast cell proliferation                                                 |                     |                                                     |                     |                   |     |
| GO:0070668                                                                            | 0.00683557664080414 | 225.25                                              | 0.00685073697321985 | 1                 | 3   |
| positive regulation of mast cell proliferation                                        |                     |                                                     |                     |                   |     |
| GO:0071639                                                                            | 0.00683557664080414 | 225.25                                              | 0.00685073697321985 | 1                 | 3   |
| positive regulation of monocyte chemotactic protein-1 production                      |                     |                                                     |                     |                   |     |
| GO:0072244                                                                            | 0.00683557664080414 | 225.25                                              | 0.00685073697321985 | 1                 | 3   |
| metanephric glomerular epithelium development                                         |                     |                                                     |                     |                   |     |
| GO:0072248                                                                            | 0.00683557664080414 | 225.25                                              | 0.00685073697321985 | 1                 | 3   |
| metanephric glomerular visceral epithelial cell differentiation                       |                     |                                                     |                     |                   |     |
| GO:0072249                                                                            | 0.00683557664080414 | 225.25                                              | 0.00685073697321985 | 1                 | 3   |
| metanephric glomerular visceral epithelial cell development                           |                     |                                                     |                     |                   |     |
| GO:0072312                                                                            | 0.00683557664080414 | 225.25                                              | 0.00685073697321985 | 1                 | 3   |
| metanephric glomerular epithelial cell differentiation                                |                     |                                                     |                     |                   |     |
| GO:0072313                                                                            | 0.00683557664080414 | 225.25                                              | 0.00685073697321985 | 1                 | 3   |
| metanephric glomerular epithelial cell development                                    |                     |                                                     |                     |                   |     |
| GO:1901164                                                                            | 0.00683557664080414 | 225.25                                              | 0.00685073697321985 | 1                 | 3   |
| negative regulation of trophoblast cell migration                                     |                     |                                                     |                     |                   |     |
| GO:2000467                                                                            | 0.00683557664080414 | 225.25                                              | 0.00685073697321985 | 1                 | 3   |
| positive regulation of glycogen (starch) synthase activity                            |                     |                                                     |                     |                   |     |
| GO:0006790                                                                            | 0.00695592397448554 | 8.43136094674556                                    |                     | 0.392775586464605 |     |
| 3                                                                                     | 172                 | sulfur compound metabolic process                   |                     |                   |     |
| GO:0046651                                                                            | 0.00695592397448554 | 8.43136094674556                                    |                     | 0.392775586464605 |     |
| 3                                                                                     | 172                 | lymphocyte proliferation                            |                     |                   |     |
| GO:0032368                                                                            | 0.00696287953114553 | 17.4863055386488                                    |                     | 0.125596844509031 |     |
| 2                                                                                     | 55                  | regulation of lipid transport                       |                     |                   |     |
| GO:0045639                                                                            | 0.00696287953114553 | 17.4863055386488                                    |                     | 0.125596844509031 |     |
| 2                                                                                     | 55                  | positive regulation of myeloid cell differentiation |                     |                   |     |
| GO:0032943                                                                            | 0.00718064994085068 | 8.33157894736842                                    |                     | 0.397342744446751 |     |
| 3                                                                                     | 174                 | mononuclear cell proliferation                      |                     |                   |     |
| GO:0030048                                                                            | 0.00797707204132772 | 16.2546689303905                                    |                     | 0.134731160473324 |     |
| 2                                                                                     | 59                  | actin filament-based movement                       |                     |                   |     |
| GO:0046942                                                                            | 0.008001113998289   | 8                                                   | 0.413327797384264   | 3                 | 181 |
| carboxylic acid transport                                                             |                     |                                                     |                     |                   |     |
| GO:0070661                                                                            | 0.00812266346310296 | 7.95474860335196                                    |                     | 0.415611376375337 |     |
| 3                                                                                     | 182                 | leukocyte proliferation                             |                     |                   |     |
| GO:0015849                                                                            | 0.00824530508517664 | 7.91                                                | 0.417894955366411   | 3                 | 183 |
| organic acid transport                                                                |                     |                                                     |                     |                   |     |
| GO:0030856                                                                            | 0.00850766980920513 | 15.7014762165118                                    |                     | 0.13929831845547  |     |

STable4\_20PerPair

|                                   |                                  |                                                      |                  |          |                     |                   |          |
|-----------------------------------|----------------------------------|------------------------------------------------------|------------------|----------|---------------------|-------------------|----------|
| 2                                 | 61                               | regulation of epithelial cell differentiation        |                  |          |                     |                   |          |
| GO:0005977                        | 0.00877878079102428              |                                                      | 15.4387096774194 |          |                     | 0.141581897446543 |          |
| 2                                 | 62                               | glycogen metabolic process                           |                  |          |                     |                   |          |
| GO:0006096                        | 0.00877878079102428              |                                                      | 15.4387096774194 |          |                     | 0.141581897446543 |          |
| 2                                 | 62                               | glycolysis                                           |                  |          |                     |                   |          |
| GO:0006869                        | 0.00887497436532377              |                                                      | 7.69351351351351 |          |                     | 0.429312850321777 |          |
| 3                                 | 188                              | lipid transport                                      |                  |          |                     |                   |          |
| GO:0006073                        | 0.00905374255208205              |                                                      | 15.1845584346906 |          |                     | 0.143865476437617 |          |
| 2                                 | 63                               | cellular glucan metabolic process                    |                  |          |                     |                   |          |
| GO:0007588                        | 0.00905374255208205              |                                                      | 15.1845584346906 |          |                     | 0.143865476437617 |          |
| 2                                 | 63                               | excretion                                            |                  |          |                     |                   |          |
| GO:0044042                        | 0.00905374255208205              |                                                      | 15.1845584346906 |          |                     | 0.143865476437617 |          |
| 2                                 | 63                               | glucan metabolic process                             |                  |          |                     |                   |          |
| GO:0000255                        | 0.00910401697654961              |                                                      | 150.15625        |          | 0.00913431596429313 |                   | 1        |
| 4                                 |                                  | allantoin metabolic process                          |                  |          |                     |                   |          |
| GO:0001661                        | 0.00910401697654961              |                                                      | 150.15625        |          | 0.00913431596429313 |                   | 1        |
| 4                                 |                                  | conditioned taste aversion                           |                  |          |                     |                   |          |
| GO:0006003                        | 0.00910401697654961              |                                                      | 150.15625        |          | 0.00913431596429313 |                   | 1        |
| 4                                 |                                  | fructose 2,6-bisphosphate metabolic process          |                  |          |                     |                   |          |
| GO:0006549                        | 0.00910401697654961              |                                                      | 150.15625        |          | 0.00913431596429313 |                   | 1        |
| 4                                 |                                  | isoleucine metabolic process                         |                  |          |                     |                   |          |
| GO:0010694                        | 0.00910401697654961              |                                                      | 150.15625        |          | 0.00913431596429313 |                   | 1        |
| 4                                 |                                  | positive regulation of alkaline phosphatase activity |                  |          |                     |                   |          |
| GO:0015793                        | 0.00910401697654961              |                                                      | 150.15625        |          | 0.00913431596429313 |                   | 1        |
| 4                                 |                                  | glycerol transport                                   |                  |          |                     |                   |          |
| GO:0021631                        | 0.00910401697654961              |                                                      | 150.15625        |          | 0.00913431596429313 |                   | 1        |
| 4                                 |                                  | optic nerve morphogenesis                            |                  |          |                     |                   |          |
| GO:0032329                        | 0.00910401697654961              |                                                      | 150.15625        |          | 0.00913431596429313 |                   | 1        |
| 4                                 |                                  | serine transport                                     |                  |          |                     |                   |          |
| GO:0033023                        | 0.00910401697654961              |                                                      | 150.15625        |          | 0.00913431596429313 |                   | 1        |
| 4                                 |                                  | mast cell homeostasis                                |                  |          |                     |                   |          |
| GO:0033024                        | 0.00910401697654961              |                                                      | 150.15625        |          | 0.00913431596429313 |                   | 1        |
| 4                                 |                                  | mast cell apoptotic process                          |                  |          |                     |                   |          |
| GO:0033025                        | 0.00910401697654961              |                                                      | 150.15625        |          | 0.00913431596429313 |                   | 1        |
| 4                                 |                                  | regulation of mast cell apoptotic process            |                  |          |                     |                   |          |
| GO:0035788                        | 0.00910401697654961              |                                                      | 150.15625        |          | 0.00913431596429313 |                   | 1        |
| 4                                 |                                  | cell migration involved in metanephros development   |                  |          |                     |                   |          |
| GO:0035789                        | 0.00910401697654961              |                                                      | 150.15625        |          | 0.00913431596429313 |                   | 1        |
| 4                                 |                                  | metanephric mesenchymal cell migration               |                  |          |                     |                   |          |
| GO:0046449                        | 0.00910401697654961              |                                                      | 150.15625        |          | 0.00913431596429313 |                   | 1        |
| 4                                 |                                  | creatinine metabolic process                         |                  |          |                     |                   |          |
| GO:0061450                        | 0.00910401697654961              |                                                      | 150.15625        |          | 0.00913431596429313 |                   | 1        |
| 4                                 |                                  | trophoblast cell migration                           |                  |          |                     |                   |          |
| GO:0070662                        | 0.00910401697654961              |                                                      | 150.15625        |          | 0.00913431596429313 |                   | 1        |
| 4                                 |                                  | mast cell proliferation                              |                  |          |                     |                   |          |
| GO:0070970                        | 0.00910401697654961              |                                                      | 150.15625        |          | 0.00913431596429313 |                   | 1        |
| 4                                 |                                  | interleukin-2 secretion                              |                  |          |                     |                   |          |
| GO:1901163                        | 0.00910401697654961              |                                                      | 150.15625        |          | 0.00913431596429313 |                   | 1        |
| 4                                 |                                  | regulation of trophoblast cell migration             |                  |          |                     |                   |          |
| GO:2000589                        | 0.00910401697654961              |                                                      | 150.15625        |          | 0.00913431596429313 |                   | 1        |
| 4                                 |                                  | regulation of metanephric mesenchymal cell migration |                  |          |                     |                   |          |
| GO:0048511                        | 0.00913456471449922              |                                                      | 7.61016042780749 |          |                     | 0.433880008303924 |          |
| 3                                 | 190                              | rhythmic process                                     |                  |          |                     |                   |          |
| GO:0042102                        | 0.00990155387085299              |                                                      | 14.4697580645161 |          |                     | 0.150716213410837 |          |
| 2                                 | 66                               | positive regulation of T cell proliferation          |                  |          |                     |                   |          |
| Tissue: whole_Blood=>Nerve_Tibial |                                  |                                                      |                  |          | Type: cluster       |                   |          |
| SourceGene:                       | CTD-2313J17.1(ENSG00000258922.1) |                                                      |                  |          |                     |                   |          |
| TargetGeneSet:                    | CHCHD2P6                         | HSPB7                                                | CCT8P1           | RP11     | CHRNB2              | DPT               | ACVR1C   |
| KRT8P15                           | GPBAR1                           | DES                                                  | SLC19A3          | TIMP4    | ADIPOQ              | ADIPOQ-AS1        | LVRN     |
| MLXIPL                            | AQP9                             | LRRC37A5P                                            | AGPAT2           | C10orf71 |                     | RBP4              | GPAM     |
| LGALS12                           | RPS3AP40                         | MYEOV                                                | GPD1             | PPP1R1A  | ACACB               | MYH7              | PLIN1    |
| STAT5A                            | CA4                              | SCN4A                                                | CIDEA            | PLIN4    | PLIN5               | SLC7A10           | LIPE     |
| SULT4A1                           | GYG2                             | PFKFB1                                               |                  |          |                     |                   | FTCD-AS1 |

Stable4\_20PerPair

| GOBPID     | Pvalue | OddsRatio            | ExpCount         | Count             | Size | Term                                                     |
|------------|--------|----------------------|------------------|-------------------|------|----------------------------------------------------------|
| GO:0006641 | 6      | 7.95965961852856e-08 | 34.6038647342995 |                   |      | 0.223790741125182                                        |
|            | 98     |                      |                  |                   |      | triglyceride metabolic process                           |
| GO:0006639 | 6      | 1.07255759533129e-07 | 32.8087056128293 |                   |      | 0.235208636080548                                        |
|            | 103    |                      |                  |                   |      | acylglycerol metabolic process                           |
| GO:0006638 | 6      | 1.13639611300147e-07 | 32.4716553287982 |                   |      | 0.237492215071621                                        |
|            | 104    |                      |                  |                   |      | neutral lipid metabolic process                          |
| GO:0019216 | 7      | 2.24183935298213e-07 | 20.4888934594817 |                   |      | 0.443014324268217                                        |
|            | 194    |                      |                  |                   |      | regulation of lipid metabolic process                    |
| GO:0009749 | 5      | 4.26731426718578e-06 | 24.8179611650485 |                   |      | 0.246626531035914                                        |
|            | 108    |                      |                  |                   |      | response to glucose stimulus                             |
| GO:0009746 | 5      | 5.33018893176607e-06 | 23.6607142857143 |                   |      | 0.258044425991281                                        |
|            | 113    |                      |                  |                   |      | response to hexose stimulus                              |
| GO:0034284 | 5      | 5.80925195704711e-06 | 23.2272727272727 |                   |      | 0.262611583973427                                        |
|            | 115    |                      |                  |                   |      | response to monosaccharide stimulus                      |
| GO:0019432 | 4      | 6.09748631581001e-06 | 40.4475721323012 |                   |      | 0.121029686526884                                        |
|            | 53     |                      |                  |                   |      | triglyceride biosynthetic process                        |
| GO:0046460 | 4      | 7.07899897634248e-06 | 38.8559837728195 |                   |      | 0.125596844509031                                        |
|            | 55     |                      |                  |                   |      | neutral lipid biosynthetic process                       |
| GO:0046463 | 4      | 7.07899897634248e-06 | 38.8559837728195 |                   |      | 0.125596844509031                                        |
|            | 55     |                      |                  |                   |      | acylglycerol biosynthetic process                        |
| GO:0010876 | 6      | 8.00881384652893e-06 | 15.1079213184476 |                   |      | 0.490969483080756                                        |
|            | 215    |                      |                  |                   |      | lipid localization                                       |
| GO:0009743 | 5      | 1.13902959533377e-05 | 20.0942069741282 |                   |      | 0.301432426821673                                        |
|            | 132    |                      |                  |                   |      | response to carbohydrate stimulus                        |
| GO:0043434 | 7      | 2.01369832473102e-05 | 10.0821538461538 |                   |      | 0.872327174589994                                        |
|            | 382    |                      |                  |                   |      | response to peptide hormone stimulus                     |
| GO:0046486 | 6      | 2.30751876697959e-05 | 12.4418093983311 |                   |      | 0.59144695868798                                         |
|            | 259    |                      |                  |                   |      | glycerolipid metabolic process                           |
| GO:0006112 | 5      | 3.25040083304447e-05 | 16.0141509433962 |                   |      | 0.374506954536018                                        |
|            | 164    |                      |                  |                   |      | energy reserve metabolic process                         |
| GO:0006091 | 7      | 4.17181105858948e-05 | 8.95112369815458 |                   |      | 0.977371808179365                                        |
|            | 428    |                      |                  |                   |      | generation of precursor metabolites and energy           |
| GO:0006631 | 6      | 4.18734110600985e-05 | 11.1394799054374 |                   |      | 0.657670749429105                                        |
|            | 288    |                      |                  |                   |      | fatty acid metabolic process                             |
| GO:0045834 | 4      | 5.46501790211906e-05 | 22.4608150470219 |                   |      | 0.210089267178742                                        |
|            | 92     |                      |                  |                   |      | positive regulation of lipid metabolic process           |
| GO:0044262 | 5      | 7.06567202148421e-05 | 13.5163373860182 |                   |      | 0.440730745277143                                        |
|            | 193    |                      |                  |                   |      | cellular carbohydrate metabolic process                  |
| GO:0006006 | 5      | 7.97540034018014e-05 | 13.1615470022206 |                   |      | 0.45214864023251                                         |
|            | 198    |                      |                  |                   |      | glucose metabolic process                                |
| GO:0046889 | 3      | 0.00013480857295596  | 35.0658536585366 |                   |      | 0.100477475607224                                        |
|            | 44     |                      |                  |                   |      | positive regulation of lipid biosynthetic process        |
| GO:0019318 | 5      | 0.00017482274792078  | 11.0644104803493 |                   |      | 0.534357483911148                                        |
|            | 234    |                      |                  |                   |      | hexose metabolic process                                 |
| GO:0009744 | 2      | 0.000180239911948168 | 132.820276497696 |                   |      | 0.0205522109196595                                       |
|            | 9      |                      |                  |                   |      | response to sucrose stimulus                             |
| GO:0034285 | 2      | 0.000180239911948168 | 132.820276497696 |                   |      | 0.0205522109196595                                       |
|            | 9      |                      |                  |                   |      | response to disaccharide stimulus                        |
| GO:0055089 | 2      | 0.000180239911948168 | 132.820276497696 |                   |      | 0.0205522109196595                                       |
|            | 9      |                      |                  |                   |      | fatty acid homeostasis                                   |
| GO:0019915 | 3      | 0.000186082374057382 | 31.2434782608696 |                   |      | 0.111895370562591                                        |
|            | 49     |                      |                  |                   |      | lipid storage                                            |
| GO:0010867 | 2      | 0.00022497792689792  | 116.209677419355 |                   |      | 0.0228357899107328                                       |
|            | 10     |                      |                  |                   |      | positive regulation of triglyceride biosynthetic process |
| GO:0032868 | 5      | 0.000246715170641447 | 10.2450838635049 |                   |      | 0.575461905750467                                        |
|            | 252    |                      |                  |                   |      | response to insulin stimulus                             |
| GO:0032787 | 6      | 0.000257958470179801 | 7.88917018284107 |                   |      | 0.915715175420386                                        |
|            | 401    |                      |                  |                   |      | monocarboxylic acid metabolic process                    |
| GO:0005996 |        | 0.000260608018732448 | 10.12            | 0.582312642723687 | 5    | 255                                                      |
|            |        |                      |                  |                   |      | monosaccharide metabolic process                         |
| GO:0033032 | 2      | 0.000274580123993068 | 103.290322580645 |                   |      | 0.0251193689018061                                       |
|            | 11     |                      |                  |                   |      | regulation of myeloid cell apoptotic process             |

Stable4\_20PerPair

|            |                                                         |                  |                    |      |
|------------|---------------------------------------------------------|------------------|--------------------|------|
| GO:0006094 | 0.000307315513526828                                    | 26.1145454545455 | 0.13244758148225   |      |
| 3 58       | gluconeogenesis                                         |                  |                    |      |
| GO:0016024 | 0.000329025405415394                                    | 92.9548387096774 | 0.0274029478928794 |      |
| 2 12       | CDP-diacylglycerol biosynthetic process                 |                  |                    |      |
| GO:0019319 | 0.000374340354630484                                    | 24.3372881355932 | 0.141581897446543  |      |
| 3 62       | hexose biosynthetic process                             |                  |                    |      |
| GO:0033028 | 0.000388292739320376                                    | 84.4985337243402 | 0.0296865268839527 |      |
| 2 13       | myeloid cell apoptotic process                          |                  |                    |      |
| GO:0046341 | 0.000388292739320376                                    | 84.4985337243402 | 0.0296865268839527 |      |
| 2 13       | CDP-diacylglycerol metabolic process                    |                  |                    |      |
| GO:0045017 | 0.000418976347448355                                    | 12.94555353902   | 0.356238322607432  | 4    |
| 156        | glycerolipid biosynthetic process                       |                  |                    |      |
| GO:0040014 | 0.000430331682137595                                    | 23.1548387096774 | 0.148432634419763  |      |
| 3 65       | regulation of multicellular organism growth             |                  |                    |      |
| GO:0046364 | 0.000450123790556485                                    | 22.7857142857143 | 0.150716213410837  |      |
| 3 66       | monosaccharide biosynthetic process                     |                  |                    |      |
| GO:0010866 | 0.000452361159660209                                    | 77.4516129032258 | 0.031970105875026  |      |
| 2 14       | regulation of triglyceride biosynthetic process         |                  |                    |      |
| GO:0070293 | 0.000452361159660209                                    | 77.4516129032258 | 0.031970105875026  |      |
| 2 14       | renal absorption                                        |                  |                    |      |
| GO:0003014 | 0.000470491835915483                                    | 22.428125        | 0.15299979240191   | 3    |
| 67         | renal system process                                    |                  |                    |      |
| GO:0010906 | 0.000470491835915483                                    | 22.428125        | 0.15299979240191   | 3    |
| 67         | regulation of glucose metabolic process                 |                  |                    |      |
| GO:0019217 | 0.000470491835915483                                    | 22.428125        | 0.15299979240191   | 3    |
| 67         | regulation of fatty acid metabolic process              |                  |                    |      |
| GO:0051240 | 0.000506655532519243                                    | 6.91363523880228 | 1.03902844093834   |      |
| 6 455      | positive regulation of multicellular organismal process |                  |                    |      |
| GO:0090208 | 0.000594817723377894                                    | 66.3778801843318 | 0.0365372638571725 |      |
| 2 16       | positive regulation of triglyceride metabolic process   |                  |                    |      |
| GO:0002761 | 0.000605182306922169                                    | 20.4971428571429 | 0.16670126634835   |      |
| 3 73       | regulation of myeloid leukocyte differentiation         |                  |                    |      |
| GO:0015980 | 0.000609943471952853                                    | 8.34673604541154 | 0.701058750259498  |      |
| 5 307      | energy derivation by oxidation of organic compounds     |                  |                    |      |
| GO:0016051 | 0.000718327161609398                                    | 11.1614420062696 | 0.411044218393191  |      |
| 4 180      | carbohydrate biosynthetic process                       |                  |                    |      |
| GO:0042104 | 0.000756228677422032                                    | 58.0725806451613 | 0.0411044218393191 |      |
| 2 18       | positive regulation of activated T cell proliferation   |                  |                    |      |
| GO:0010675 | 0.000880251032037665                                    | 17.9225          | 0.189537056259082  | 3 83 |
|            | regulation of cellular carbohydrate metabolic process   |                  |                    |      |
| GO:0042493 | 0.000916446693937499                                    | 7.59980578334053 | 0.767282541000623  |      |
| 5 336      | response to drug                                        |                  |                    |      |
| GO:0006109 | 0.00100918327127551                                     | 17.0642857142857 | 0.198671372223376  |      |
| 3 87       | regulation of carbohydrate metabolic process            |                  |                    |      |
| GO:0090207 | 0.00113525328177882                                     | 46.4451612903226 | 0.0502387378036122 |      |
| 2 22       | regulation of triglyceride metabolic process            |                  |                    |      |
| GO:0031667 | 0.0011718462077691                                      | 7.17755102040816 | 0.810670541831015  |      |
| 5 355      | response to nutrient levels                             |                  |                    |      |
| GO:0006732 | 0.00118699078097754                                     | 9.70706725844998 | 0.470417272161096  |      |
| 4 206      | coenzyme metabolic process                              |                  |                    |      |
| GO:0046890 | 0.00122405919835558                                     | 15.92            | 0.212372846169815  | 3 93 |
|            | regulation of lipid biosynthetic process                |                  |                    |      |
| GO:0001817 | 0.00123174727611219                                     | 7.09443099273608 | 0.819804857795308  |      |
| 5 359      | regulation of cytokine production                       |                  |                    |      |
| GO:0019433 | 0.00124159877728433                                     | 44.2304147465438 | 0.0525223167946855 |      |
| 2 23       | triglyceride catabolic process                          |                  |                    |      |
| GO:0032370 | 0.00124159877728433                                     | 44.2304147465438 | 0.0525223167946855 |      |
| 2 23       | positive regulation of lipid transport                  |                  |                    |      |
| GO:0043029 | 0.00124159877728433                                     | 44.2304147465438 | 0.0525223167946855 |      |
| 2 23       | T cell homeostasis                                      |                  |                    |      |
| GO:0045471 | 0.00126245280254452                                     | 15.743956043956  | 0.214656425160889  | 3    |
| 94         | response to ethanol                                     |                  |                    |      |
| GO:0097305 | 0.00130159908001424                                     | 15.5717391304348 | 0.216940004151962  |      |

STable4\_20PerPair

|            |     |                                                          |                  |                    |   |
|------------|-----|----------------------------------------------------------|------------------|--------------------|---|
| 3          | 95  | response to alcohol                                      |                  |                    |   |
| GO:0008016 |     | 0.00134150364896893                                      | 15.4032258064516 | 0.219223583143035  |   |
| 3          | 96  | regulation of heart contraction                          |                  |                    |   |
| GO:0050671 |     | 0.00134150364896893                                      | 15.4032258064516 | 0.219223583143035  |   |
| 3          | 96  | positive regulation of lymphocyte proliferation          |                  |                    |   |
| GO:0046006 |     | 0.00135253927893591                                      | 42.217008797654  | 0.0548058957857588 | 2 |
| 24         |     | regulation of activated T cell proliferation             |                  |                    |   |
| GO:0046461 |     | 0.00135253927893591                                      | 42.217008797654  | 0.0548058957857588 | 2 |
| 24         |     | neutral lipid catabolic process                          |                  |                    |   |
| GO:0046464 |     | 0.00135253927893591                                      | 42.217008797654  | 0.0548058957857588 | 2 |
| 24         |     | acylglycerol catabolic process                           |                  |                    |   |
| GO:0032946 |     | 0.00138217208181276                                      | 15.2382978723404 | 0.221507162134108  |   |
| 3          | 97  | positive regulation of mononuclear cell proliferation    |                  |                    |   |
| GO:0070665 |     | 0.00150881560490668                                      | 14.7639175257732 | 0.228357899107328  |   |
| 3          | 100 | positive regulation of leukocyte proliferation           |                  |                    |   |
| GO:0009991 |     | 0.00154789068584402                                      | 6.7239563385676  | 0.863192858625701  | 5 |
| 378        |     | response to extracellular stimulus                       |                  |                    |   |
| GO:0040018 |     | 0.00158812434901315                                      | 38.6935483870968 | 0.0593730537679053 |   |
| 2          | 26  | positive regulation of multicellular organism growth     |                  |                    |   |
| GO:0050798 |     | 0.00158812434901315                                      | 38.6935483870968 | 0.0593730537679053 |   |
| 2          | 26  | activated T cell proliferation                           |                  |                    |   |
| GO:0045923 |     | 0.0017127286007007                                       | 37.1432258064516 | 0.0616566327589786 |   |
| 2          | 27  | positive regulation of fatty acid metabolic process      |                  |                    |   |
| GO:0032844 |     | 0.00172440672777148                                      | 8.74014778325123 | 0.520656009964708  |   |
| 4          | 228 | regulation of homeostatic process                        |                  |                    |   |
| GO:0032720 |     | 0.00184184722471557                                      | 35.712158808933  | 0.0639402117500519 | 2 |
| 28         |     | negative regulation of tumor necrosis factor production  |                  |                    |   |
| GO:0033865 |     | 0.00184184722471557                                      | 35.712158808933  | 0.0639402117500519 | 2 |
| 28         |     | nucleoside bisphosphate metabolic process                |                  |                    |   |
| GO:0001816 |     | 0.00187841568405204                                      | 6.42307692307692 | 0.902013701473946  |   |
| 5          | 395 | cytokine production                                      |                  |                    |   |
| GO:0006936 |     | 0.00204818652604451                                      | 8.32457813646368 | 0.545775378866514  |   |
| 4          | 239 | muscle contraction                                       |                  |                    |   |
| GO:0051048 |     | 0.00208751363034533                                      | 13.1275229357798 | 0.255760847000208  |   |
| 3          | 112 | negative regulation of secretion                         |                  |                    |   |
| GO:0016042 |     | 0.00214332846222422                                      | 8.21790785279629 | 0.552626115839734  |   |
| 4          | 242 | lipid catabolic process                                  |                  |                    |   |
| GO:0051186 |     | 0.00224149476476971                                      | 8.11389326083846 | 0.559476852812954  |   |
| 4          | 245 | cofactor metabolic process                               |                  |                    |   |
| GO:0051046 |     | 0.002282237447148                                        | 6.13182773109244 | 0.943118123313265  |   |
| 5          | 413 | regulation of secretion                                  |                  |                    |   |
| GO:0003015 |     | 0.00230708936296899                                      | 12.6592920353982 | 0.264895162964501  |   |
| 3          | 116 | heart process                                            |                  |                    |   |
| GO:0060047 |     | 0.00230708936296899                                      | 12.6592920353982 | 0.264895162964501  |   |
| 3          | 116 | heart contraction                                        |                  |                    |   |
| GO:0044057 |     | 0.00237998888247377                                      | 6.07056171983356 | 0.952252439277559  |   |
| 5          | 417 | regulation of system process                             |                  |                    |   |
| GO:0046503 |     | 0.00240306638746981                                      | 30.941935483871  | 0.073074527714345  | 2 |
| 32         |     | glycerolipid catabolic process                           |                  |                    |   |
| GO:0045637 |     | 0.00242205427147634                                      | 12.4373913043478 | 0.269462320946647  |   |
| 3          | 118 | regulation of myeloid cell differentiation               |                  |                    |   |
| GO:0002763 |     | 0.00271024518725041                                      | 29.0040322580645 | 0.0776416856964916 |   |
| 2          | 34  | positive regulation of myeloid leukocyte differentiation |                  |                    |   |
| GO:0002573 |     | 0.00285223938865716                                      | 11.7180327868852 | 0.28544737388416   |   |
| 3          | 125 | myeloid leukocyte differentiation                        |                  |                    |   |
| GO:0003012 |     | 0.00301746110844096                                      | 7.45248749670966 | 0.607432011625493  |   |
| 4          | 266 | muscle system process                                    |                  |                    |   |
| GO:0051384 |     | 0.00339833948917098                                      | 10.9907692307692 | 0.303716005812747  |   |
| 3          | 133 | response to glucocorticoid stimulus                      |                  |                    |   |
| GO:0071375 |     | 0.0034896220308333                                       | 7.14664645699128 | 0.632551380527299  |   |
| 4          | 277 | cellular response to peptide hormone stimulus            |                  |                    |   |
| GO:0015909 |     | 0.00355442549303487                                      | 25.075850043592  | 0.089059580651858  | 2 |
| 39         |     | long-chain fatty acid transport                          |                  |                    |   |

STable4\_20PerPair

|                                                            |                     |                  |                     |     |
|------------------------------------------------------------|---------------------|------------------|---------------------|-----|
| GO:0030049                                                 | 0.00355442549303487 | 25.075850043592  | 0.089059580651858   | 2   |
| 39 muscle filament sliding                                 |                     |                  |                     |     |
| GO:0033275                                                 | 0.00355442549303487 | 25.075850043592  | 0.089059580651858   | 2   |
| 39 actin-myosin filament sliding                           |                     |                  |                     |     |
| GO:0044242                                                 | 0.00369380886083433 | 10.6597014925373 | 0.31285032177704    |     |
| 3 137 cellular lipid catabolic process                     |                     |                  |                     |     |
| GO:0002260                                                 | 0.00373617448509086 | 24.4142614601019 | 0.0913431596429313  |     |
| 2 40 lymphocyte homeostasis                                |                     |                  |                     |     |
| GO:0006637                                                 | 0.00373617448509086 | 24.4142614601019 | 0.0913431596429313  |     |
| 2 40 acyl-CoA metabolic process                            |                     |                  |                     |     |
| GO:0035383                                                 | 0.00373617448509086 | 24.4142614601019 | 0.0913431596429313  |     |
| 2 40 thioester metabolic process                           |                     |                  |                     |     |
| GO:0007565                                                 | 0.00392542749391757 | 10.4240875912409 | 0.31970105875026    |     |
| 3 140 female pregnancy                                     |                     |                  |                     |     |
| GO:0031960                                                 | 0.00408466676056487 | 10.2726618705036 | 0.324268216732406   |     |
| 3 142 response to corticosteroid stimulus                  |                     |                  |                     |     |
| GO:0070252                                                 | 0.00411243099306515 | 23.1903225806452 | 0.0959103176250778  |     |
| 2 42 actin-mediated cell contraction                       |                     |                  |                     |     |
| GO:0050670                                                 | 0.00424780202510783 | 10.1255319148936 | 0.328835374714553   |     |
| 3 144 regulation of lymphocyte proliferation               |                     |                  |                     |     |
| GO:0046888                                                 | 0.00430690018207738 | 22.6231313926043 | 0.0981938966161511  |     |
| 2 43 negative regulation of hormone secretion              |                     |                  |                     |     |
| GO:0032944                                                 | 0.00433083971768706 | 10.0535211267606 | 0.331118953705626   |     |
| 3 145 regulation of mononuclear cell proliferation         |                     |                  |                     |     |
| GO:0048871                                                 | 0.00433083971768706 | 10.0535211267606 | 0.331118953705626   |     |
| 3 145 multicellular organismal homeostasis                 |                     |                  |                     |     |
| GO:0032623                                                 | 0.00450557121108316 | 22.0829493087558 | 0.100477475607224   |     |
| 2 44 interleukin-2 production                              |                     |                  |                     |     |
| GO:0070663                                                 | 0.00476087008678795 | 9.70816326530612 | 0.342536848660992   |     |
| 3 150 regulation of leukocyte proliferation                |                     |                  |                     |     |
| GO:0008015                                                 | 0.00480145424207656 | 6.51320493599354 | 0.691924434295204   |     |
| 4 303 blood circulation                                    |                     |                  |                     |     |
| GO:0048545                                                 | 0.00480145424207656 | 6.51320493599354 | 0.691924434295204   |     |
| 4 303 response to steroid hormone stimulus                 |                     |                  |                     |     |
| GO:0003013                                                 | 0.00485769549577889 | 6.49103448275862 | 0.694208013286278   |     |
| 4 304 circulatory system process                           |                     |                  |                     |     |
| GO:0010565                                                 | 0.0051229100949274  | 9.44834437086093 | 0.351671164625285   |     |
| 3 154 regulation of cellular ketone metabolic process      |                     |                  |                     |     |
| GO:0015850                                                 | 0.00534189439482383 | 20.1570827489481 | 0.109611791571518   |     |
| 2 48 organic alcohol transport                             |                     |                  |                     |     |
| GO:0016052                                                 | 0.00550119277722173 | 9.20193548387097 | 0.360805480589579   |     |
| 3 158 carbohydrate catabolic process                       |                     |                  |                     |     |
| GO:0001776                                                 | 0.00556129065102666 | 19.7268359643102 | 0.111895370562591   |     |
| 2 49 leukocyte homeostasis                                 |                     |                  |                     |     |
| GO:0015908                                                 | 0.00647957616206189 | 18.1745730550285 | 0.121029686526884   |     |
| 2 53 fatty acid transport                                  |                     |                  |                     |     |
| GO:0044275                                                 | 0.00671922984530893 | 17.8238213399504 | 0.123313265517957   |     |
| 2 54 cellular carbohydrate catabolic process               |                     |                  |                     |     |
| GO:0045638                                                 | 0.00671922984530893 | 17.8238213399504 | 0.123313265517957   |     |
| 2 54 negative regulation of myeloid cell differentiation   |                     |                  |                     |     |
| GO:0050871                                                 | 0.00671922984530893 | 17.8238213399504 | 0.123313265517957   |     |
| 2 54 positive regulation of B cell activation              |                     |                  |                     |     |
| GO:0009756                                                 | 0.00683557664080414 | 225.25           | 0.00685073697321985 | 1 3 |
| carbohydrate mediated signaling                            |                     |                  |                     |     |
| GO:0015825                                                 | 0.00683557664080414 | 225.25           | 0.00685073697321985 | 1 3 |
| L-serine transport                                         |                     |                  |                     |     |
| GO:0021562                                                 | 0.00683557664080414 | 225.25           | 0.00685073697321985 | 1 3 |
| vestibulocochlear nerve development                        |                     |                  |                     |     |
| GO:0032226                                                 | 0.00683557664080414 | 225.25           | 0.00685073697321985 | 1 3 |
| positive regulation of synaptic transmission, dopaminergic |                     |                  |                     |     |
| GO:0033026                                                 | 0.00683557664080414 | 225.25           | 0.00685073697321985 | 1 3 |
| negative regulation of mast cell apoptotic process         |                     |                  |                     |     |
| GO:0033034                                                 | 0.00683557664080414 | 225.25           | 0.00685073697321985 | 1 3 |



STable4\_20PerPair

|                                                                                       |                     |                  |                     |                   |     |
|---------------------------------------------------------------------------------------|---------------------|------------------|---------------------|-------------------|-----|
| positive regulation of myeloid cell apoptotic process                                 |                     |                  |                     |                   |     |
| GO:0033211                                                                            | 0.00683557664080414 | 225.25           | 0.00685073697321985 | 1                 | 3   |
| adiponectin-mediated signaling pathway                                                |                     |                  |                     |                   |     |
| GO:0045715                                                                            | 0.00683557664080414 | 225.25           | 0.00685073697321985 | 1                 | 3   |
| negative regulation of low-density lipoprotein particle receptor biosynthetic process |                     |                  |                     |                   |     |
| GO:0045759                                                                            | 0.00683557664080414 | 225.25           | 0.00685073697321985 | 1                 | 3   |
| negative regulation of action potential                                               |                     |                  |                     |                   |     |
| GO:0046544                                                                            | 0.00683557664080414 | 225.25           | 0.00685073697321985 | 1                 | 3   |
| development of secondary male sexual characteristics                                  |                     |                  |                     |                   |     |
| GO:0060084                                                                            | 0.00683557664080414 | 225.25           | 0.00685073697321985 | 1                 | 3   |
| synaptic transmission involved in micturition                                         |                     |                  |                     |                   |     |
| GO:0060375                                                                            | 0.00683557664080414 | 225.25           | 0.00685073697321985 | 1                 | 3   |
| regulation of mast cell differentiation                                               |                     |                  |                     |                   |     |
| GO:0070666                                                                            | 0.00683557664080414 | 225.25           | 0.00685073697321985 | 1                 | 3   |
| regulation of mast cell proliferation                                                 |                     |                  |                     |                   |     |
| GO:0070668                                                                            | 0.00683557664080414 | 225.25           | 0.00685073697321985 | 1                 | 3   |
| positive regulation of mast cell proliferation                                        |                     |                  |                     |                   |     |
| GO:0071639                                                                            | 0.00683557664080414 | 225.25           | 0.00685073697321985 | 1                 | 3   |
| positive regulation of monocyte chemotactic protein-1 production                      |                     |                  |                     |                   |     |
| GO:0072244                                                                            | 0.00683557664080414 | 225.25           | 0.00685073697321985 | 1                 | 3   |
| metanephric glomerular epithelium development                                         |                     |                  |                     |                   |     |
| GO:0072248                                                                            | 0.00683557664080414 | 225.25           | 0.00685073697321985 | 1                 | 3   |
| metanephric glomerular visceral epithelial cell differentiation                       |                     |                  |                     |                   |     |
| GO:0072249                                                                            | 0.00683557664080414 | 225.25           | 0.00685073697321985 | 1                 | 3   |
| metanephric glomerular visceral epithelial cell development                           |                     |                  |                     |                   |     |
| GO:0072312                                                                            | 0.00683557664080414 | 225.25           | 0.00685073697321985 | 1                 | 3   |
| metanephric glomerular epithelial cell differentiation                                |                     |                  |                     |                   |     |
| GO:0072313                                                                            | 0.00683557664080414 | 225.25           | 0.00685073697321985 | 1                 | 3   |
| metanephric glomerular epithelial cell development                                    |                     |                  |                     |                   |     |
| GO:1901164                                                                            | 0.00683557664080414 | 225.25           | 0.00685073697321985 | 1                 | 3   |
| negative regulation of trophoblast cell migration                                     |                     |                  |                     |                   |     |
| GO:2000467                                                                            | 0.00683557664080414 | 225.25           | 0.00685073697321985 | 1                 | 3   |
| positive regulation of glycogen (starch) synthase activity                            |                     |                  |                     |                   |     |
| GO:0006790                                                                            | 0.00695592397448554 | 8.43136094674556 |                     | 0.392775586464605 |     |
| 3                                                                                     | 172                 |                  |                     |                   |     |
| sulfur compound metabolic process                                                     |                     |                  |                     |                   |     |
| GO:0046651                                                                            | 0.00695592397448554 | 8.43136094674556 |                     | 0.392775586464605 |     |
| 3                                                                                     | 172                 |                  |                     |                   |     |
| lymphocyte proliferation                                                              |                     |                  |                     |                   |     |
| GO:0032368                                                                            | 0.00696287953114553 | 17.4863055386488 |                     | 0.125596844509031 |     |
| 2                                                                                     | 55                  |                  |                     |                   |     |
| regulation of lipid transport                                                         |                     |                  |                     |                   |     |
| GO:0045639                                                                            | 0.00696287953114553 | 17.4863055386488 |                     | 0.125596844509031 |     |
| 2                                                                                     | 55                  |                  |                     |                   |     |
| positive regulation of myeloid cell differentiation                                   |                     |                  |                     |                   |     |
| GO:0032943                                                                            | 0.00718064994085068 | 8.33157894736842 |                     | 0.397342744446751 |     |
| 3                                                                                     | 174                 |                  |                     |                   |     |
| mononuclear cell proliferation                                                        |                     |                  |                     |                   |     |
| GO:0030048                                                                            | 0.00797707204132772 | 16.2546689303905 |                     | 0.134731160473324 |     |
| 2                                                                                     | 59                  |                  |                     |                   |     |
| actin filament-based movement                                                         |                     |                  |                     |                   |     |
| GO:0046942                                                                            | 0.008001113998289   | 8                | 0.413327797384264   | 3                 | 181 |
| carboxylic acid transport                                                             |                     |                  |                     |                   |     |
| GO:0070661                                                                            | 0.00812266346310296 | 7.95474860335196 |                     | 0.415611376375337 |     |
| 3                                                                                     | 182                 |                  |                     |                   |     |
| leukocyte proliferation                                                               |                     |                  |                     |                   |     |
| GO:0015849                                                                            | 0.00824530508517664 | 7.91             | 0.417894955366411   | 3                 | 183 |
| organic acid transport                                                                |                     |                  |                     |                   |     |
| GO:0030856                                                                            | 0.00850766980920513 | 15.7014762165118 |                     | 0.13929831845547  |     |
| 2                                                                                     | 61                  |                  |                     |                   |     |
| regulation of epithelial cell differentiation                                         |                     |                  |                     |                   |     |
| GO:0005977                                                                            | 0.00877878079102428 | 15.4387096774194 |                     | 0.141581897446543 |     |
| 2                                                                                     | 62                  |                  |                     |                   |     |
| glycogen metabolic process                                                            |                     |                  |                     |                   |     |
| GO:0006096                                                                            | 0.00877878079102428 | 15.4387096774194 |                     | 0.141581897446543 |     |
| 2                                                                                     | 62                  |                  |                     |                   |     |
| glycolysis                                                                            |                     |                  |                     |                   |     |
| GO:0006869                                                                            | 0.00887497436532377 | 7.69351351351351 |                     | 0.429312850321777 |     |
| 3                                                                                     | 188                 |                  |                     |                   |     |
| lipid transport                                                                       |                     |                  |                     |                   |     |
| GO:0006073                                                                            | 0.00905374255208205 | 15.1845584346906 |                     | 0.143865476437617 |     |
| 2                                                                                     | 63                  |                  |                     |                   |     |
| cellular glucan metabolic process                                                     |                     |                  |                     |                   |     |
| GO:0007588                                                                            | 0.00905374255208205 | 15.1845584346906 |                     | 0.143865476437617 |     |

STable4\_20PerPair

|                                   |           |                                                                     |                  |                   |                     |        |         |        |        |
|-----------------------------------|-----------|---------------------------------------------------------------------|------------------|-------------------|---------------------|--------|---------|--------|--------|
| 2                                 | 63        | excretion                                                           |                  |                   |                     |        |         |        |        |
| GO:0044042                        |           | 0.00905374255208205                                                 | 15.1845584346906 |                   | 0.143865476437617   |        |         |        |        |
| 2                                 | 63        | glucan metabolic process                                            |                  |                   |                     |        |         |        |        |
| GO:0000255                        |           | 0.00910401697654961                                                 | 150.15625        |                   | 0.00913431596429313 |        | 1       |        |        |
| 4                                 |           | allantoin metabolic process                                         |                  |                   |                     |        |         |        |        |
| GO:0001661                        |           | 0.00910401697654961                                                 | 150.15625        |                   | 0.00913431596429313 |        | 1       |        |        |
| 4                                 |           | conditioned taste aversion                                          |                  |                   |                     |        |         |        |        |
| GO:0006003                        |           | 0.00910401697654961                                                 | 150.15625        |                   | 0.00913431596429313 |        | 1       |        |        |
| 4                                 |           | fructose 2,6-bisphosphate metabolic process                         |                  |                   |                     |        |         |        |        |
| GO:0006549                        |           | 0.00910401697654961                                                 | 150.15625        |                   | 0.00913431596429313 |        | 1       |        |        |
| 4                                 |           | isoleucine metabolic process                                        |                  |                   |                     |        |         |        |        |
| GO:0010694                        |           | 0.00910401697654961                                                 | 150.15625        |                   | 0.00913431596429313 |        | 1       |        |        |
| 4                                 |           | positive regulation of alkaline phosphatase activity                |                  |                   |                     |        |         |        |        |
| GO:0015793                        |           | 0.00910401697654961                                                 | 150.15625        |                   | 0.00913431596429313 |        | 1       |        |        |
| 4                                 |           | glycerol transport                                                  |                  |                   |                     |        |         |        |        |
| GO:0021631                        |           | 0.00910401697654961                                                 | 150.15625        |                   | 0.00913431596429313 |        | 1       |        |        |
| 4                                 |           | optic nerve morphogenesis                                           |                  |                   |                     |        |         |        |        |
| GO:0032329                        |           | 0.00910401697654961                                                 | 150.15625        |                   | 0.00913431596429313 |        | 1       |        |        |
| 4                                 |           | serine transport                                                    |                  |                   |                     |        |         |        |        |
| GO:0033023                        |           | 0.00910401697654961                                                 | 150.15625        |                   | 0.00913431596429313 |        | 1       |        |        |
| 4                                 |           | mast cell homeostasis                                               |                  |                   |                     |        |         |        |        |
| GO:0033024                        |           | 0.00910401697654961                                                 | 150.15625        |                   | 0.00913431596429313 |        | 1       |        |        |
| 4                                 |           | mast cell apoptotic process                                         |                  |                   |                     |        |         |        |        |
| GO:0033025                        |           | 0.00910401697654961                                                 | 150.15625        |                   | 0.00913431596429313 |        | 1       |        |        |
| 4                                 |           | regulation of mast cell apoptotic process                           |                  |                   |                     |        |         |        |        |
| GO:0035788                        |           | 0.00910401697654961                                                 | 150.15625        |                   | 0.00913431596429313 |        | 1       |        |        |
| 4                                 |           | cell migration involved in metanephros development                  |                  |                   |                     |        |         |        |        |
| GO:0035789                        |           | 0.00910401697654961                                                 | 150.15625        |                   | 0.00913431596429313 |        | 1       |        |        |
| 4                                 |           | metanephric mesenchymal cell migration                              |                  |                   |                     |        |         |        |        |
| GO:0046449                        |           | 0.00910401697654961                                                 | 150.15625        |                   | 0.00913431596429313 |        | 1       |        |        |
| 4                                 |           | creatinine metabolic process                                        |                  |                   |                     |        |         |        |        |
| GO:0061450                        |           | 0.00910401697654961                                                 | 150.15625        |                   | 0.00913431596429313 |        | 1       |        |        |
| 4                                 |           | trophoblast cell migration                                          |                  |                   |                     |        |         |        |        |
| GO:0070662                        |           | 0.00910401697654961                                                 | 150.15625        |                   | 0.00913431596429313 |        | 1       |        |        |
| 4                                 |           | mast cell proliferation                                             |                  |                   |                     |        |         |        |        |
| GO:0070970                        |           | 0.00910401697654961                                                 | 150.15625        |                   | 0.00913431596429313 |        | 1       |        |        |
| 4                                 |           | interleukin-2 secretion                                             |                  |                   |                     |        |         |        |        |
| GO:1901163                        |           | 0.00910401697654961                                                 | 150.15625        |                   | 0.00913431596429313 |        | 1       |        |        |
| 4                                 |           | regulation of trophoblast cell migration                            |                  |                   |                     |        |         |        |        |
| GO:2000589                        |           | 0.00910401697654961                                                 | 150.15625        |                   | 0.00913431596429313 |        | 1       |        |        |
| 4                                 |           | regulation of metanephric mesenchymal cell migration                |                  |                   |                     |        |         |        |        |
| GO:0048511                        |           | 0.00913456471449922                                                 | 7.61016042780749 |                   | 0.433880008303924   |        |         |        |        |
| 3                                 | 190       | rhythmic process                                                    |                  |                   |                     |        |         |        |        |
| GO:0042102                        |           | 0.00990155387085299                                                 | 14.4697580645161 |                   | 0.150716213410837   |        |         |        |        |
| 2                                 | 66        | positive regulation of T cell proliferation                         |                  |                   |                     |        |         |        |        |
| Tissue: whole_Blood=>Nerve_Tibial |           | Type: asymmetric                                                    |                  |                   |                     |        |         |        |        |
| SourceGene:                       |           | CUL4A(ENSG00000139842.10)                                           |                  |                   |                     |        |         |        |        |
| TargetGeneSet:                    |           | KIF17                                                               | RPL11            | RPS8              | CELSR2              | WDR3   | DISC1   | UBC    | EIF4G1 |
| RPL37                             | CTB       | RPS14                                                               | PAQR8            | C7orf59           | C8orf22             | RPS6   | RP11    | PLXDC2 | OGDHL  |
| OPALIN                            | AFAP1L2   | RPL27A                                                              | RNY4P12          | PFDN5             | RPS2P5              | LGALS3 | UACA    | RPS15A | CTD    |
| USP10                             | RPL13     | RPS4XP17                                                            |                  | DHX33             | ALOX12              | SLC4A1 | ST8SIA3 | RPL36  | RPS19  |
| C20orf7                           | EEF1A1P34 | TOP1                                                                | DGCR6L           | RPS2P55           | RPL39               |        |         |        |        |
| GOBPID                            | Pvalue    | OddsRatio                                                           | ExpCount         | Count             | Size                | Term   |         |        |        |
| GO:0000184                        |           | 1.24897502355414e-21                                                | 106.02962962963  | 0.263511175697184 |                     |        |         | 14     |        |
| 119                               |           | nuclear-transcribed mRNA catabolic process, nonsense-mediated decay |                  |                   |                     |        |         |        |        |
| GO:0006415                        |           | 3.16171307186085e-21                                                | 125.798245614035 |                   | 0.201508546121376   |        |         |        |        |
| 13                                | 91        | translational termination                                           |                  |                   |                     |        |         |        |        |
| GO:0006414                        |           | 2.26310575893594e-20                                                | 106.550915331808 |                   | 0.23250986090928    |        |         |        |        |
| 13                                | 105       | translational elongation                                            |                  |                   |                     |        |         |        |        |
| GO:0006614                        |           | 2.26310575893594e-20                                                | 106.550915331808 |                   | 0.23250986090928    |        |         |        |        |
| 13                                | 105       | SRP-dependent cotranslational protein targeting to membrane         |                  |                   |                     |        |         |        |        |
| GO:0006613                        |           | 2.5762848558257e-20                                                 | 105.397849462366 |                   | 0.234724240536987   |        |         |        |        |
| 13                                | 106       | cotranslational protein targeting to membrane                       |                  |                   |                     |        |         |        |        |

Stable4\_20PerPair

|                 |                                                                |                           |                    |
|-----------------|----------------------------------------------------------------|---------------------------|--------------------|
| GO:0045047      | 2.5762848558257e-20                                            | 105.397849462366          | 0.234724240536987  |
| 13 106          | protein targeting to ER                                        |                           |                    |
| GO:0072599      | 2.5762848558257e-20                                            | 105.397849462366          | 0.234724240536987  |
| 13 106          | establishment of protein localization to endoplasmic reticulum |                           |                    |
| GO:0006413      | 4.41839364815424e-20                                           | 80.4887278582931          | 0.336585703411529  |
| 14 152          | translational initiation                                       |                           |                    |
| GO:0070972      | 1.10974300524213e-19                                           | 93.2741854636592          | 0.261296796069476  |
| 13 118          | protein localization to endoplasmic reticulum                  |                           |                    |
| GO:0000956      | 2.03667109337544e-19                                           | 71.5756272401434          | 0.374230157082555  |
| 14 169          | nuclear-transcribed mRNA catabolic process                     |                           |                    |
| GO:0006402      | 4.28813336523965e-19                                           | 67.6050135501355          | 0.394159573731922  |
| 14 178          | mRNA catabolic process                                         |                           |                    |
| GO:0019080      | 3.06758669200438e-18                                           | 70.8058733790999          | 0.334371323783821  |
| 13 151          | viral genome expression                                        |                           |                    |
| GO:0019083      | 3.06758669200438e-18                                           | 70.8058733790999          | 0.334371323783821  |
| 13 151          | viral transcription                                            |                           |                    |
| GO:0006401      | 3.21991973746047e-18                                           | 57.9383362420012          | 0.453947823680022  |
| 14 205          | RNA catabolic process                                          |                           |                    |
| GO:0006612      | 3.65694427156894e-18                                           | 69.7845864661654          | 0.338800083039236  |
| 13 153          | protein targeting to membrane                                  |                           |                    |
| GO:0043624      | 3.65694427156894e-18                                           | 69.7845864661654          | 0.338800083039236  |
| 13 153          | cellular protein complex disassembly                           |                           |                    |
| GO:0043241      | 5.61566052569289e-18                                           | 67.3546279491833          | 0.349871981177773  |
| 13 158          | protein complex disassembly                                    |                           |                    |
| GO:0034623      | 2.0239181888553e-17                                            | 60.5930042497548          | 0.385302055221092  |
| 13 174          | cellular macromolecular complex disassembly                    |                           |                    |
| GO:0032984      | 2.94558056497476e-17                                           | 58.7473050095117          | 0.396373953359629  |
| 13 179          | macromolecular complex disassembly                             |                           |                    |
| GO:0072594      | 1.65240705598338e-16                                           | 50.9683108294296          | 0.451733444052315  |
| 13 204          | establishment of protein localization to organelle             |                           |                    |
| GO:0019058      | 8.42480598174367e-16                                           | 44.5709802028006          | 0.511521694000415  |
| 13 231          | viral infectious cycle                                         |                           |                    |
| GO:0022415      | 3.93172573517223e-15                                           | 39.2576177285319          | 0.575738703203931  |
| 13 260          | viral reproductive process                                     |                           |                    |
| GO:0071845      | 1.23449504183135e-14                                           | 35.7203340454457          | 0.628883814268909  |
| 13 284          | cellular component disassembly at cellular level               |                           |                    |
| GO:0022411      | 1.47911356394452e-14                                           | 35.1908133971292          | 0.637741332779738  |
| 13 288          | cellular component disassembly                                 |                           |                    |
| GO:0033365      | 3.68090591887531e-13                                           | 23.6552892762043          | 1.04740156390561   |
| 14 473          | protein localization to organelle                              |                           |                    |
| GO:0006605      | 3.78839596302438e-13                                           | 23.6021739130435          | 1.04961594353332   |
| 14 474          | protein targeting                                              |                           |                    |
| GO:0016032      | 4.54313354767063e-12                                           | 21.8400624849796          | 0.998685212096049  |
| 13 451          | viral reproduction                                             |                           |                    |
| GO:0042274      | 5.92798374568652e-08                                           | 146.989795918367          | 0.0398588332987337 |
| 4 18            | ribosomal small subunit biogenesis                             |                           |                    |
| GO:0006364      | 3.02375370973492e-06                                           | 26.7863823419379          | 0.230295481281572  |
| 5 104           | rRNA processing                                                |                           |                    |
| GO:0016072      | 3.98675482202562e-06                                           | 25.2451499118166          | 0.243581759047817  |
| 5 110           | rRNA metabolic process                                         |                           |                    |
| GO:0022613      | 8.60790909856727e-06                                           | 14.9631190727081          | 0.498235416234171  |
| 6 225           | ribonucleoprotein complex biogenesis                           |                           |                    |
| GO:0071843      | 1.21469877748305e-05                                           | 14.0501815780786          | 0.529236731022075  |
| 6 239           | cellular component biogenesis at cellular level                |                           |                    |
| GO:0042254      | 1.75278236072245e-05                                           | 18.3577674897119          | 0.329942564528406  |
| 5 149           | ribosome biogenesis                                            |                           |                    |
| GO:0000028      | 7.08649346705689e-05                                           | 240.25 0.0132862777662446 | 2 6                |
| ribosomal small | subunit assembly                                               |                           |                    |
| GO:0034470      | 7.17649374984581e-05                                           | 13.5080721747388          | 0.442875925541485  |
| 5 200           | ncRNA processing                                               |                           |                    |
| GO:0030490      | 9.90736496479359e-05                                           | 192.186666666667          | 0.015500657393952  |
| 2 7             | maturation of SSU-rRNA                                         |                           |                    |
| GO:0034660      | 0.000374834957853287                                           | 9.35119047619048          | 0.631098193896616  |

STable4\_20PerPair

|                                   |     |                                                                  |                  |                   |      |                    |     |                    |   |
|-----------------------------------|-----|------------------------------------------------------------------|------------------|-------------------|------|--------------------|-----|--------------------|---|
| 5                                 | 285 | ncRNA metabolic process                                          |                  |                   |      |                    |     |                    |   |
| GO:0042255                        |     | 0.000559129016773945                                             | 68.5952380952381 |                   |      |                    |     | 0.0354300740433188 |   |
| 2                                 | 16  | ribosome assembly                                                |                  |                   |      |                    |     |                    |   |
| GO:0022618                        |     | 0.00118890525093476                                              | 16.109820089955  | 0.210366064632205 |      |                    |     |                    | 3 |
| 95                                |     | ribonucleoprotein complex assembly                               |                  |                   |      |                    |     |                    |   |
| GO:0071826                        |     | 0.00137853377482935                                              | 15.2740846071809 |                   |      |                    |     | 0.221437962770743  |   |
| 3                                 | 100 | ribonucleoprotein complex subunit organization                   |                  |                   |      |                    |     |                    |   |
| GO:0009311                        |     | 0.00270053835413189                                              | 29.06262626263   |                   |      |                    |     | 0.0775032869697599 |   |
| 2                                 | 35  | oligosaccharide metabolic process                                |                  |                   |      |                    |     |                    |   |
| GO:0042770                        |     | 0.00359380637828664                                              | 10.7842939843947 |                   |      |                    |     | 0.310013147879039  |   |
| 3                                 | 140 | signal transduction in response to DNA damage                    |                  |                   |      |                    |     |                    |   |
| GO:0006417                        |     | 0.00722953372170327                                              | 8.32378725891292 |                   |      |                    |     | 0.398588332987337  |   |
| 3                                 | 180 | regulation of translation                                        |                  |                   |      |                    |     |                    |   |
| GO:0009313                        |     | 0.00882905451161087                                              | 155.010752688172 |                   |      |                    |     | 0.0088575185108297 |   |
| 1                                 | 4   | oligosaccharide catabolic process                                |                  |                   |      |                    |     |                    |   |
| GO:0042058                        |     | 0.00905849143105096                                              | 15.1915343915344 |                   |      |                    |     | 0.143934675800983  |   |
| 2                                 | 65  | regulation of epidermal growth factor receptor signaling pathway |                  |                   |      |                    |     |                    |   |
| GO:1901184                        |     | 0.00905849143105096                                              | 15.1915343915344 |                   |      |                    |     | 0.143934675800983  |   |
| 2                                 | 65  | regulation of ERBB signaling pathway                             |                  |                   |      |                    |     |                    |   |
| Tissue: Whole_Blood=>Nerve_Tibial |     |                                                                  | Type: cluster    |                   |      |                    |     |                    |   |
| SourceGene:                       |     | ENSG00000215692.2                                                |                  |                   |      |                    |     |                    |   |
| TargetGeneSet:                    |     | MMEL1 RHD MRPS21 ILF2 LAMTOR2 TOR1AIP1 CYB5R1                    |                  |                   |      |                    |     |                    |   |
| MRPL33 TXNDC9                     |     | CCDC115 NIF3L1 GPBAR1 SLC19A3 NEU4 ABHD5 GLT8D1 SPCS1 ATG3       |                  |                   |      |                    |     |                    |   |
| COPS4 CCRN4L                      |     | PDCD6 CTD HINT1 UQCRQ UBE2D2 COX7A2 HMGN3 RSPH4A                 |                  |                   |      |                    |     |                    |   |
| PSMB1 NDUFA5                      |     | RP11 DCTN3 ATP5C1 NDUFB8 NDUFS3 MRPL16 POLR2G NDUFA9 POMP        |                  |                   |      |                    |     |                    |   |
| ACTR10 ERH                        |     | GTF2A2 COX5A IMP3 WDR61 PSMA4 MRPL28 NDUFB10 MT1A                |                  |                   |      |                    |     |                    |   |
| C17orf75                          |     | MAPT NT5C MYL12B CIDEA C19orf10 C19orf70                         |                  |                   |      |                    |     |                    |   |
| NR2F6 LIPE                        |     | PFDN4 ATP5J RP13 SLC25A14                                        |                  |                   |      |                    |     |                    |   |
| GOBPID Pvalue                     |     | OddsRatio                                                        | ExpCount         | Count             | Size | Term               |     |                    |   |
| GO:0022904                        |     | 7.14548993627377e-11                                             | 32.8965517241379 |                   |      | 0.358729499688603  |     |                    |   |
| 9                                 | 96  | respiratory electron transport chain                             |                  |                   |      |                    |     |                    |   |
| GO:0045333                        |     | 1.00921237123601e-10                                             | 24.5609504132231 |                   |      | 0.530620718289392  |     |                    |   |
| 10                                | 142 | cellular respiration                                             |                  |                   |      |                    |     |                    |   |
| GO:0022900                        |     | 1.44440940593033e-09                                             | 22.8352          | 0.500726593315342 |      | 9                  | 134 |                    |   |
|                                   |     | electron transport chain                                         |                  |                   |      |                    |     |                    |   |
| GO:0015980                        |     | 1.41230806753552e-08                                             | 12.1865964802011 |                   |      | 1.14718704587918   |     |                    |   |
| 11                                | 307 | energy derivation by oxidation of organic compounds              |                  |                   |      |                    |     |                    |   |
| GO:0006119                        |     | 7.13260775497814e-08                                             | 34.4831730769231 |                   |      | 0.216732406061864  |     |                    |   |
| 6                                 | 58  | oxidative phosphorylation                                        |                  |                   |      |                    |     |                    |   |
| GO:0006120                        |     | 2.08094257316656e-07                                             | 47.2876892692561 |                   |      | 0.134523562383226  |     |                    |   |
| 5                                 | 36  | mitochondrial electron transport, NADH to ubiquinone             |                  |                   |      |                    |     |                    |   |
| GO:0006091                        |     | 4.11010024982092e-07                                             | 8.57620880040154 |                   |      | 1.59933568611169   |     |                    |   |
| 11                                | 428 | generation of precursor metabolites and energy                   |                  |                   |      |                    |     |                    |   |
| GO:0042773                        |     | 8.20775950669017e-07                                             | 34.8760932944606 |                   |      | 0.175627984222545  |     |                    |   |
| 5                                 | 47  | ATP synthesis coupled electron transport                         |                  |                   |      |                    |     |                    |   |
| GO:0042775                        |     | 8.20775950669017e-07                                             | 34.8760932944606 |                   |      | 0.175627984222545  |     |                    |   |
| 5                                 | 47  | mitochondrial ATP synthesis coupled electron transport           |                  |                   |      |                    |     |                    |   |
| GO:0010889                        |     | 0.000485187089209365                                             | 79.0659340659341 |                   |      | 0.0336308905958065 |     |                    |   |
| 2                                 | 9   | regulation of sequestering of triglyceride                       |                  |                   |      |                    |     |                    |   |
| GO:0030730                        |     | 0.000883135281802382                                             | 55.3346153846154 |                   |      | 0.0448411874610754 |     |                    |   |
| 2                                 | 12  | sequestering of triglyceride                                     |                  |                   |      |                    |     |                    |   |
| GO:0042776                        |     | 0.00104120748370045                                              | 50.3006993006993 |                   |      | 0.0485779530828316 |     |                    |   |
| 2                                 | 13  | mitochondrial ATP synthesis coupled proton transport             |                  |                   |      |                    |     |                    |   |
| GO:0015985                        |     | 0.00201806400550782                                              | 34.5697115384615 |                   |      | 0.067261781191613  |     |                    |   |
| 2                                 | 18  | energy coupled proton transport, down electrochemical gradient   |                  |                   |      |                    |     |                    |   |
| GO:0015986                        |     | 0.00201806400550782                                              | 34.5697115384615 |                   |      | 0.067261781191613  |     |                    |   |
| 2                                 | 18  | ATP synthesis coupled proton transport                           |                  |                   |      |                    |     |                    |   |
| GO:0006368                        |     | 0.00285995989622136                                              | 11.5423045930701 |                   |      | 0.283994187253477  |     |                    |   |
| 3                                 | 76  | transcription elongation from RNA polymerase II promoter         |                  |                   |      |                    |     |                    |   |
| GO:0019433                        |     | 0.00329739848003617                                              | 26.3296703296703 |                   |      | 0.0859456093003944 |     |                    |   |
| 2                                 | 23  | triglyceride catabolic process                                   |                  |                   |      |                    |     |                    |   |
| GO:0046461                        |     | 0.00358857698598804                                              | 25.1311188811189 |                   |      | 0.0896823749221507 |     |                    |   |
| 2                                 | 24  | neutral lipid catabolic process                                  |                  |                   |      |                    |     |                    |   |

Stable4\_20PerPair

|                                   |                     |                                         |                      |
|-----------------------------------|---------------------|-----------------------------------------|----------------------|
| GO:0046464                        | 0.00358857698598804 | 25.1311188811189                        | 0.0896823749221507   |
| 2                                 | 24                  | acylglycerol catabolic process          |                      |
| GO:0010883                        | 0.00594578868574476 | 19.0557029177719                        | 0.115839734274445    |
| 2                                 | 31                  | regulation of lipid storage             |                      |
| GO:0046503                        | 0.00632706927272287 | 18.4192307692308                        | 0.119576499896201    |
| 2                                 | 32                  | glycerolipid catabolic process          |                      |
| GO:0006839                        | 0.00688407507148582 | 8.32615026208503                        | 0.388623624662653    |
| 3                                 | 104                 | mitochondrial transport                 |                      |
| GO:0006213                        | 0.00712218686936403 | 17.265625                               | 0.127050031139714    |
| 34                                |                     | pyrimidine nucleoside metabolic process | 2                    |
| GO:0006354                        | 0.00763737610691479 | 8.00672268907563                        | 0.403570687149678    |
| 3                                 | 108                 | DNA-dependent transcription, elongation |                      |
| GO:0050994                        | 0.0097620332936343  | 14.5334008097166                        | 0.149470624870251    |
| 2                                 | 40                  | regulation of lipid catabolic process   |                      |
| Tissue: whole_Blood=>Nerve_Tibial |                     | Type: asymmetric                        |                      |
| SourceGene:                       | ENSG00000223427.1   |                                         |                      |
| TargetGeneSet:                    | RPL11               | BEND5                                   | RP11                 |
| RPL30                             | SLC25A16            | RP3                                     | C12orf57             |
| FAM195B                           | PLAUR               | RPS9                                    |                      |
| GOBPID                            | Pvalue              | OddsRatio                               | ExpCount             |
| GO:0006415                        | 8                   | 91                                      | 2.2645856743272e-15  |
| 8                                 |                     |                                         | 276.722891566265     |
| GO:0006414                        | 8                   | 105                                     | 7.39737806616546e-15 |
| 8                                 |                     |                                         | 236.552577319588     |
| GO:0006614                        | 8                   | 105                                     | 7.39737806616546e-15 |
| 8                                 |                     |                                         | 236.552577319588     |
| GO:0006613                        | 8                   | 106                                     | 7.99876945837285e-15 |
| 8                                 |                     |                                         | 234.122448979592     |
| GO:0045047                        | 8                   | 106                                     | 7.99876945837285e-15 |
| 8                                 |                     |                                         | 234.122448979592     |
| GO:0072599                        | 8                   | 106                                     | 7.99876945837285e-15 |
| 8                                 |                     |                                         | 234.122448979592     |
| GO:0070972                        | 8                   | 118                                     | 1.93301394887444e-14 |
| 8                                 |                     |                                         | 208.407272727273     |
| GO:0000184                        | 8                   | 119                                     | 2.07168843987525e-14 |
| 8                                 |                     |                                         | 206.515315315315     |
| GO:0019080                        | 8                   | 151                                     | 1.45197876836852e-13 |
| 8                                 |                     |                                         | 159.944055944056     |
| GO:0019083                        | 8                   | 151                                     | 1.45197876836852e-13 |
| 8                                 |                     |                                         | 159.944055944056     |
| GO:0006413                        | 8                   | 152                                     | 1.53216865161122e-13 |
| 8                                 |                     |                                         | 158.822222222222     |
| GO:0006612                        | 8                   | 153                                     | 1.61620037654147e-13 |
| 8                                 |                     |                                         | 157.715862068966     |
| GO:0043624                        | 8                   | 153                                     | 1.61620037654147e-13 |
| 8                                 |                     |                                         | 157.715862068966     |
| GO:0043241                        | 8                   | 158                                     | 2.09964281985463e-13 |
| 8                                 |                     |                                         | 152.405333333333     |
| GO:0000956                        | 8                   | 169                                     | 3.62799703186586e-13 |
| 8                                 |                     |                                         | 141.883229813665     |
| GO:0034623                        | 8                   | 174                                     | 4.59644970334229e-13 |
| 8                                 |                     |                                         | 137.561445783133     |
| GO:0006402                        | 8                   | 178                                     | 5.52669097790648e-13 |
| 8                                 |                     |                                         | 134.287058823529     |
| GO:0032984                        | 8                   | 179                                     | 5.78345150665467e-13 |
| 8                                 |                     |                                         | 133.492397660819     |
| GO:0072594                        | 8                   | 204                                     | 1.66562301569108e-12 |
| 8                                 |                     |                                         | 116.261224489796     |
| GO:0006401                        | 8                   | 205                                     | 1.73272298658867e-12 |
| 8                                 |                     |                                         | 115.662944162437     |
| GO:0019058                        | 8                   | 231                                     | 4.53847616254241e-12 |
| 8                                 |                     |                                         | 101.991031390135     |
| GO:0022415                        | 8                   |                                         | 1.17453174807e-11    |
|                                   |                     |                                         | 90.0698412698413     |

STable4\_20PerPair

|                                   |     |                                                         |                   |                     |  |   |                     |   |
|-----------------------------------|-----|---------------------------------------------------------|-------------------|---------------------|--|---|---------------------|---|
| 8                                 | 260 | viral reproductive process                              |                   |                     |  |   |                     |   |
| GO:0071845                        |     | 2.3844783469826e-11                                     | 82.0985507246377  |                     |  |   | 0.255484049546744   |   |
| 8                                 | 284 | cellular component disassembly at cellular level        |                   |                     |  |   |                     |   |
| GO:0022411                        |     | 2.66715589585514e-11                                    | 80.9028571428571  |                     |  |   | 0.259082416441769   |   |
| 8                                 | 288 | cellular component disassembly                          |                   |                     |  |   |                     |   |
| GO:0016032                        |     | 9.49610229002725e-10                                    | 50.5462753950339  |                     |  |   | 0.40571586741402    |   |
| 8                                 | 451 | viral reproduction                                      |                   |                     |  |   |                     |   |
| GO:0033365                        |     | 1.38442515114239e-09                                    | 48.0791397849462  |                     |  |   | 0.425506885336655   |   |
| 8                                 | 473 | protein localization to organelle                       |                   |                     |  |   |                     |   |
| GO:0006605                        |     | 1.40774668848207e-09                                    | 47.9725321888412  |                     |  |   | 0.426406477060411   |   |
| 8                                 | 474 | protein targeting                                       |                   |                     |  |   |                     |   |
| GO:0022613                        |     | 3.66390468420667e-05                                    | 28.5912518853695  |                     |  |   | 0.202408137845132   |   |
| 4                                 | 225 | ribonucleoprotein complex biogenesis                    |                   |                     |  |   |                     |   |
| GO:0071843                        |     | 4.63911088316707e-05                                    | 26.8614657210402  |                     |  |   | 0.215002421977718   |   |
| 4                                 | 239 | cellular component biogenesis at cellular level         |                   |                     |  |   |                     |   |
| GO:0042273                        |     | 4.90566804345865e-05                                    | 262.327272727273  |                     |  |   | 0.0107951006850737  |   |
| 2                                 | 12  | ribosomal large subunit biogenesis                      |                   |                     |  |   |                     |   |
| GO:0006364                        |     | 9.82729892449382e-05                                    | 42.5851485148515  |                     |  |   | 0.0935575392706387  |   |
| 3                                 | 104 | rRNA processing                                         |                   |                     |  |   |                     |   |
| GO:0016072                        |     | 0.000116104888066178                                    | 40.1803738317757  |                     |  |   | 0.0989550896131756  |   |
| 3                                 | 110 | rRNA metabolic process                                  |                   |                     |  |   |                     |   |
| GO:0042254                        |     | 0.000284810388586126                                    | 29.3671232876712  |                     |  |   | 0.134039166839665   |   |
| 3                                 | 149 | ribosome biogenesis                                     |                   |                     |  |   |                     |   |
| GO:0034470                        |     | 0.000674215310389172                                    | 21.6868020304569  |                     |  |   | 0.179918344751228   |   |
| 3                                 | 200 | ncRNA processing                                        |                   |                     |  |   |                     |   |
| GO:0034660                        |     | 0.00187474148387098                                     | 15.0595744680851  |                     |  |   | 0.2563836412705     | 3 |
| 285                               |     | ncRNA metabolic process                                 |                   |                     |  |   |                     |   |
| GO:0035845                        |     | 0.00269653454263397                                     | 601.5             | 0.00269877517126842 |  | 1 |                     | 3 |
|                                   |     | photoreceptor cell outer segment organization           |                   |                     |  |   |                     |   |
| GO:0022618                        |     | 0.00318190779670647                                     | 28.0449657869013  |                     |  |   | 0.0854612137568334  |   |
| 2                                 | 95  | ribonucleoprotein complex assembly                      |                   |                     |  |   |                     |   |
| GO:0071826                        |     | 0.00351860284161307                                     | 26.6048237476809  |                     |  |   | 0.0899591723756141  |   |
| 2                                 | 100 | ribonucleoprotein complex subunit organization          |                   |                     |  |   |                     |   |
| GO:0000028                        |     | 0.00538635572456225                                     | 240.55            | 0.00539755034253685 |  | 1 |                     | 6 |
|                                   |     | ribosomal small subunit assembly                        |                   |                     |  |   |                     |   |
| GO:0000244                        |     | 0.00538635572456225                                     | 240.55            | 0.00539755034253685 |  | 1 |                     | 6 |
|                                   |     | assembly of spliceosomal tri-snRNP                      |                   |                     |  |   |                     |   |
| GO:0046548                        |     | 0.00538635572456225                                     | 240.55            | 0.00539755034253685 |  | 1 |                     | 6 |
|                                   |     | retinal rod cell development                            |                   |                     |  |   |                     |   |
| GO:0016255                        |     | 0.00628147357680053                                     | 200.4444444444444 |                     |  |   | 0.00629714206629299 |   |
| 1                                 | 7   | attachment of GPI anchor to protein                     |                   |                     |  |   |                     |   |
| GO:0030490                        |     | 0.00628147357680053                                     | 200.4444444444444 |                     |  |   | 0.00629714206629299 |   |
| 1                                 | 7   | maturation of SSU-rRNA                                  |                   |                     |  |   |                     |   |
| GO:0042670                        |     | 0.00717584776978741                                     | 171.797619047619  |                     |  |   | 0.00719673379004913 |   |
| 1                                 | 8   | retinal cone cell differentiation                       |                   |                     |  |   |                     |   |
| GO:0046549                        |     | 0.00717584776978741                                     | 171.797619047619  |                     |  |   | 0.00719673379004913 |   |
| 1                                 | 8   | retinal cone cell development                           |                   |                     |  |   |                     |   |
| GO:0035082                        |     | 0.00806947886990461                                     | 150.3125          | 0.00809632551380527 |  |   |                     | 1 |
| 9                                 |     | axoneme assembly                                        |                   |                     |  |   |                     |   |
| GO:0007603                        |     | 0.00985451405509652                                     | 120.2333333333333 |                     |  |   | 0.00989550896131756 |   |
| 1                                 | 11  | phototransduction, visible light                        |                   |                     |  |   |                     |   |
| GO:0015939                        |     | 0.00985451405509652                                     | 120.2333333333333 |                     |  |   | 0.00989550896131756 |   |
| 1                                 | 11  | pantothenate metabolic process                          |                   |                     |  |   |                     |   |
| Tissue: whole_Blood=>Nerve_Tibial |     | Type: asymmetric                                        |                   |                     |  |   |                     |   |
| SourceGene:                       |     | ENSG00000239868.1                                       |                   |                     |  |   |                     |   |
| TargetGeneSet:                    |     | RPL11 PTP4A2 SPATA1 PKP4 STXBP5L RPL37 RPS14 RPL30 RPS6 |                   |                     |  |   |                     |   |
| MLLT3 FAU                         |     | SSH3 RP11 BRCA1 TEN1 H2AFB1 TSPY2                       |                   |                     |  |   |                     |   |
| GOBPID Pvalue                     |     | OddsRatio ExpCount Count Size Term                      |                   |                     |  |   |                     |   |
| GO:0006415                        |     | 1.52134492269554e-10                                    | 126.635294117647  |                     |  |   | 0.0881599889281019  |   |
| 6                                 | 91  | translational termination                               |                   |                     |  |   |                     |   |
| GO:0006414                        |     | 3.64866860971662e-10                                    | 108.621212121212  |                     |  |   | 0.10172306414781    |   |
| 6                                 | 105 | translational elongation                                |                   |                     |  |   |                     |   |
| GO:0006614                        |     | 3.64866860971662e-10                                    | 108.621212121212  |                     |  |   | 0.10172306414781    |   |

Stable4\_20PerPair

|                 |     |                                                                     |                  |                     |   |   |
|-----------------|-----|---------------------------------------------------------------------|------------------|---------------------|---|---|
| 6               | 105 | SRP-dependent cotranslational protein targeting to membrane         |                  |                     |   |   |
| GO:0006613      |     | 3.86574351311955e-10                                                | 107.5275         | 0.102691855234932   |   | 6 |
| 106             |     | cotranslational protein targeting to membrane                       |                  |                     |   |   |
| GO:0045047      |     | 3.86574351311955e-10                                                | 107.5275         | 0.102691855234932   |   | 6 |
| 106             |     | protein targeting to ER                                             |                  |                     |   |   |
| GO:0072599      |     | 3.86574351311955e-10                                                | 107.5275         | 0.102691855234932   |   | 6 |
| 106             |     | establishment of protein localization to endoplasmic reticulum      |                  |                     |   |   |
| GO:0070972      |     | 7.4244611047915e-10                                                 | 95.9263392857143 | 0.114317348280396   |   |   |
| 6               | 118 | protein localization to endoplasmic reticulum                       |                  |                     |   |   |
| GO:0000184      |     | 7.81494755081527e-10                                                | 95.070796460177  | 0.115286139367518   |   | 6 |
| 119             |     | nuclear-transcribed mRNA catabolic process, nonsense-mediated decay |                  |                     |   |   |
| GO:0019080      |     | 3.30213632810986e-09                                                | 73.9241379310345 | 0.146287454155422   |   |   |
| 6               | 151 | viral genome expression                                             |                  |                     |   |   |
| GO:0019083      |     | 3.30213632810986e-09                                                | 73.9241379310345 | 0.146287454155422   |   |   |
| 6               | 151 | viral transcription                                                 |                  |                     |   |   |
| GO:0006413      |     | 3.43619654365752e-09                                                | 73.4126712328767 | 0.147256245242544   |   |   |
| 6               | 152 | translational initiation                                            |                  |                     |   |   |
| GO:0006612      |     | 3.57473907535994e-09                                                | 72.9081632653061 | 0.148225036329666   |   |   |
| 6               | 153 | protein targeting to membrane                                       |                  |                     |   |   |
| GO:0043624      |     | 3.57473907535994e-09                                                | 72.9081632653061 | 0.148225036329666   |   |   |
| 6               | 153 | cellular protein complex disassembly                                |                  |                     |   |   |
| GO:0043241      |     | 4.33889801528491e-09                                                | 70.4851973684211 | 0.153068991765276   |   |   |
| 6               | 158 | protein complex disassembly                                         |                  |                     |   |   |
| GO:0000956      |     | 6.50453295792254e-09                                                | 65.6779141104294 | 0.163725693723618   |   |   |
| 6               | 169 | nuclear-transcribed mRNA catabolic process                          |                  |                     |   |   |
| GO:0034623      |     | 7.74967672713448e-09                                                | 63.7008928571429 | 0.168569649159228   |   |   |
| 6               | 174 | cellular macromolecular complex disassembly                         |                  |                     |   |   |
| GO:0006402      |     | 8.88250406825206e-09                                                | 62.2020348837209 | 0.172444813507716   |   |   |
| 6               | 178 | mRNA catabolic process                                              |                  |                     |   |   |
| GO:0032984      |     | 9.18616671947224e-09                                                | 61.8381502890173 | 0.173413604594838   |   |   |
| 6               | 179 | macromolecular complex disassembly                                  |                  |                     |   |   |
| GO:0072594      |     | 2.00974441671439e-08                                                | 53.9356060606061 | 0.197633381772888   |   |   |
| 6               | 204 | establishment of protein localization to organelle                  |                  |                     |   |   |
| GO:0006401      |     | 2.06934699435073e-08                                                | 53.6608040201005 | 0.19860217286001    |   |   |
| 6               | 205 | RNA catabolic process                                               |                  |                     |   |   |
| GO:0019058      |     | 4.21891608217816e-08                                                | 47.3733333333333 | 0.223790741125182   |   |   |
| 6               | 231 | viral infectious cycle                                              |                  |                     |   |   |
| GO:0022415      |     | 8.521368995048e-08                                                  | 41.878937007874  | 0.25188568265172    |   | 6 |
| 260             |     | viral reproductive process                                          |                  |                     |   |   |
| GO:0071845      |     | 1.43783632651427e-07                                                | 38.1987410071942 | 0.275136668742648   |   |   |
| 6               | 284 | cellular component disassembly at cellular level                    |                  |                     |   |   |
| GO:0022411      |     | 1.56185396868913e-07                                                | 37.6462765957447 | 0.279011833091136   |   |   |
| 6               | 288 | cellular component disassembly                                      |                  |                     |   |   |
| GO:0016032      |     | 2.16953986617778e-06                                                | 23.5820224719101 | 0.436924780292021   |   |   |
| 6               | 451 | viral reproduction                                                  |                  |                     |   |   |
| GO:0033365      |     | 2.86094470380534e-06                                                | 22.4357601713062 | 0.458238184208705   |   |   |
| 6               | 473 | protein localization to organelle                                   |                  |                     |   |   |
| GO:0006605      |     | 2.89621490432341e-06                                                | 22.3862179487179 | 0.459206975295827   |   |   |
| 6               | 474 | protein targeting                                                   |                  |                     |   |   |
| GO:0000028      |     | 1.30447221048509e-05                                                | 601.375          | 0.00581274652273199 | 2 | 6 |
| ribosomal small |     | subunit assembly                                                    |                  |                     |   |   |
| GO:0022613      |     | 5.06695558328355e-05                                                | 25.7303167420814 | 0.21797799460245    |   |   |
| 4               | 225 | ribonucleoprotein complex biogenesis                                |                  |                     |   |   |
| GO:0071843      |     | 6.41061779079662e-05                                                | 24.1736170212766 | 0.231541069822158   |   |   |
| 4               | 239 | cellular component biogenesis at cellular level                     |                  |                     |   |   |
| GO:0022618      |     | 9.50589881477697e-05                                                | 42.5247035573123 | 0.0920351532765899  |   |   |
| 3               | 95  | ribonucleoprotein complex assembly                                  |                  |                     |   |   |
| GO:0042255      |     | 0.000103781500201939                                                | 171.702380952381 | 0.015500657393952   |   |   |
| 2               | 16  | ribosome assembly                                                   |                  |                     |   |   |
| GO:0071826      |     | 0.000110733184868375                                                | 40.3186504217432 | 0.0968791087121998  |   |   |
| 3               | 100 | ribonucleoprotein complex subunit organization                      |                  |                     |   |   |
| GO:0006364      |     | 0.000124420910820782                                                | 38.7110711071107 | 0.100754273060688   |   |   |
| 3               | 104 | rRNA processing                                                     |                  |                     |   |   |

Stable4\_20PerPair

|            |                                                                              |                  |                     |       |
|------------|------------------------------------------------------------------------------|------------------|---------------------|-------|
| GO:0042274 | 0.000132174965241725                                                         | 150.21875        | 0.017438239568196   | 2     |
| 18         | ribosomal small subunit biogenesis                                           |                  |                     |       |
| GO:0016072 | 0.000146951707561641                                                         | 36.5250637213254 | 0.10656701958342    |       |
| 3          | 110 rRNA metabolic process                                                   |                  |                     |       |
| GO:0042254 | 0.000359751295570921                                                         | 26.6955168119552 | 0.144349871981178   |       |
| 3          | 149 ribosome biogenesis                                                      |                  |                     |       |
| GO:0034470 | 0.000849373375463598                                                         | 19.713890170743  | 0.1937582174244     | 3 200 |
|            | ncRNA processing                                                             |                  |                     |       |
| GO:0034660 | 0.00235143837695017                                                          | 13.6895551257253 | 0.27610545982977    |       |
| 3          | 285 ncRNA metabolic process                                                  |                  |                     |       |
| GO:0090240 | 0.00290375925494735                                                          | 555.192307692308 | 0.002906373261366   |       |
| 1          | 3 positive regulation of histone H4 acetylation                              |                  |                     |       |
| GO:2000052 | 0.00290375925494735                                                          | 555.192307692308 | 0.002906373261366   |       |
| 1          | 3 positive regulation of non-canonical wnt receptor signaling pathway        |                  |                     |       |
| GO:0070925 | 0.00354549173861422                                                          | 26.2747252747253 | 0.0900975711023459  |       |
| 2          | 93 organelle assembly                                                        |                  |                     |       |
| GO:0034770 | 0.00386993778280076                                                          | 370.102564102564 | 0.00387516434848799 |       |
| 1          | 4 histone H4-K20 methylation                                                 |                  |                     |       |
| GO:0051573 | 0.00386993778280076                                                          | 370.102564102564 | 0.00387516434848799 |       |
| 1          | 4 negative regulation of histone H3-K9 methylation                           |                  |                     |       |
| GO:2000095 | 0.00386993778280076                                                          | 370.102564102564 | 0.00387516434848799 |       |
| 1          | 4 regulation of wnt receptor signaling pathway, planar cell polarity pathway |                  |                     |       |
| GO:0006334 | 0.00466373673300363                                                          | 22.7492063492064 | 0.103660646322054   |       |
| 2          | 107 nucleosome assembly                                                      |                  |                     |       |
| GO:0009048 | 0.00483524690379789                                                          | 277.557692307692 | 0.00484395543560999 |       |
| 1          | 5 dosage compensation by inactivation of X chromosome                        |                  |                     |       |
| GO:0071680 | 0.00483524690379789                                                          | 277.557692307692 | 0.00484395543560999 |       |
| 1          | 5 response to indole-3-methanol                                              |                  |                     |       |
| GO:0071681 | 0.00483524690379789                                                          | 277.557692307692 | 0.00484395543560999 |       |
| 1          | 5 cellular response to indole-3-methanol                                     |                  |                     |       |
| GO:0090239 | 0.00483524690379789                                                          | 277.557692307692 | 0.00484395543560999 |       |
| 1          | 5 regulation of histone H4 acetylation                                       |                  |                     |       |
| GO:0031497 | 0.00554993442191808                                                          | 20.7565217391304 | 0.113348557193274   |       |
| 2          | 117 chromatin assembly                                                       |                  |                     |       |
| GO:0000244 | 0.00579968734013603                                                          | 222.030769230769 | 0.00581274652273199 |       |
| 1          | 6 assembly of spliceosomal tri-snRNP                                         |                  |                     |       |
| GO:2000050 | 0.00579968734013603                                                          | 222.030769230769 | 0.00581274652273199 |       |
| 1          | 6 regulation of non-canonical wnt receptor signaling pathway                 |                  |                     |       |
| GO:0034728 | 0.00640862140835673                                                          | 19.2379032258065 | 0.122067676977372   |       |
| 2          | 126 nucleosome organization                                                  |                  |                     |       |
| GO:0007506 | 0.00676325981346515                                                          | 185.012820512821 | 0.00678153760985399 |       |
| 1          | 7 gonadal mesoderm development                                               |                  |                     |       |
| GO:0007549 | 0.00676325981346515                                                          | 185.012820512821 | 0.00678153760985399 |       |
| 1          | 7 dosage compensation                                                        |                  |                     |       |
| GO:0030490 | 0.00676325981346515                                                          | 185.012820512821 | 0.00678153760985399 |       |
| 1          | 7 maturation of SSU-rRNA                                                     |                  |                     |       |
| GO:0031061 | 0.00676325981346515                                                          | 185.012820512821 | 0.00678153760985399 |       |
| 1          | 7 negative regulation of histone methylation                                 |                  |                     |       |
| GO:0051570 | 0.00676325981346515                                                          | 185.012820512821 | 0.00678153760985399 |       |
| 1          | 7 regulation of histone H3-K9 methylation                                    |                  |                     |       |
| GO:0085020 | 0.00676325981346515                                                          | 185.012820512821 | 0.00678153760985399 |       |
| 1          | 7 protein K6-linked ubiquitination                                           |                  |                     |       |
| GO:0065004 | 0.00732424844092379                                                          | 17.9248120300752 | 0.13078679676147    |       |
| 2          | 135 protein-DNA complex assembly                                             |                  |                     |       |
| GO:0006333 | 0.00764195344331103                                                          | 17.5257352941176 | 0.133693170022836   |       |
| 2          | 138 chromatin assembly or disassembly                                        |                  |                     |       |
| GO:0046599 | 0.0077259650448841                                                           | 158.571428571429 | 0.00775032869697599 |       |
| 1          | 8 regulation of centriole replication                                        |                  |                     |       |
| GO:0051571 | 0.0077259650448841                                                           | 158.571428571429 | 0.00775032869697599 |       |
| 1          | 8 positive regulation of histone H3-K4 methylation                           |                  |                     |       |
| GO:0045717 | 0.00868780375494249                                                          | 138.740384615385 | 0.00871911978409799 |       |
| 1          | 9 negative regulation of fatty acid biosynthetic process                     |                  |                     |       |



Stable4\_20PerPair

|                                   |                                                            |                  |                    |              |
|-----------------------------------|------------------------------------------------------------|------------------|--------------------|--------------|
| GO:0071824                        | 0.00897436294612409                                        | 16.0912162162162 | 0.1453186630683    | 2            |
| 150                               | protein-DNA complex subunit organization                   |                  |                    |              |
| GO:0090068                        | 0.0090898026421742                                         | 15.9821029082774 | 0.146287454155422  |              |
| 2                                 | 151 positive regulation of cell cycle process              |                  |                    |              |
| GO:0006323                        | 0.00932269705721255                                        | 15.7682119205298 | 0.148225036329666  |              |
| 2                                 | 153 DNA packaging                                          |                  |                    |              |
| Tissue: Nerve_Tibial=>whole_Blood |                                                            | Type: cluster    |                    |              |
| SourceGene: ENSG00000241115.1     |                                                            |                  |                    |              |
| TargetGeneSet: Clorf135           |                                                            | RP11             | Clorf173           | RP4-788L13.1 |
| HAPLN2                            | BCAN                                                       | KCNJ9            | CNTN2              | AGT          |
| VSNL1                             | DPYSL5                                                     | TMEM178          | CTNNA2             | IGKV1-9      |
| SCN2A                             | CHN1                                                       | CDK5R2           | KIF1A              | SLC6A1       |
| MOBP                              | CAMKV                                                      | SYNPR            | CADM2              | GAP43        |
| STXBP5L                           | TF                                                         | ZIC1             | SOX2-OT            | NAT8L        |
| UCHL1                             | GABRG1                                                     | PCDH10           | GRIA2              | CTNND2       |
| SOWAHA                            | SLC6A7                                                     | CAMK2A           | GABRB2             | GABRA1       |
| CPLX2                             | SNCB                                                       | MOG              | GRM4               | PACSIN1      |
| BEND6                             | SNAP91                                                     | DGKB             | ADCY1              | VSTM2A       |
| CALN1                             | KCND2                                                      | DPP6             | PHYHIP             | PENK         |
| STMN2                             | GLDC                                                       | GABBR2           | DBC1               | USP20        |
| GRIN1                             | GPR158                                                     | GAD2             | OGDHL              | PHYHIPL      |
| OPALIN                            | LDB1                                                       | PTPN5            | SLC1A2             | SYT13        |
| C11orf87                          |                                                            | DDX25            | OPCML              | KCNA1        |
| CNTN1                             | FAIM2                                                      | SYT1             | SLC6A15            | SRRM4        |
| SYNDIG1L                          |                                                            | CYP46A1          | IGHA1              | GABRA5       |
| UNC13C                            | ARHGDI3                                                    | ASPHD1           | NDRG4              | VAT1L        |
| EFNB3                             | PPP1R1B                                                    | GFAP             | RIT2               | SYT4         |
| ST8SIA3                           | CNDP1                                                      | CTXN1            | MAG                | APLP1        |
| SLC8A2                            | CACNG7                                                     | TTYH1            | PEG3               | CHGB         |
| SNAP25                            | NNAT                                                       | SLC32A1          | ZNF334             | MYT1         |
| DONSON                            | PCP4                                                       | HIRA             | IGLC2              | DERL3        |
| PLP1                              |                                                            |                  |                    | PISD         |
| GOBPID                            | Pvalue                                                     | OddsRatio        | ExpCount           | Count        |
| GO:0006836                        | 3.22352373267445e-10                                       | 17.2760141093474 | 0.782298802851014  |              |
| 11                                | 119 neurotransmitter transport                             |                  |                    |              |
| GO:0001505                        | 7.57284467015395e-09                                       | 14.8287350338365 | 0.808594560930039  |              |
| 10                                | 123 regulation of neurotransmitter levels                  |                  |                    |              |
| GO:0007214                        | 8.84060676375253e-08                                       | 61.2948717948718 | 0.118330911355616  |              |
| 5                                 | 18 gamma-aminobutyric acid signaling pathway               |                  |                    |              |
| GO:0007269                        | 9.01340808494988e-08                                       | 16.832301797819  | 0.565358798699052  | 8            |
| 86                                | neurotransmitter secretion                                 |                  |                    |              |
| GO:0007610                        | 3.50225574868082e-07                                       | 5.78090354767184 | 3.06345581620649   |              |
| 15                                | 466 behavior                                               |                  |                    |              |
| GO:0007611                        | 3.57801976966592e-07                                       | 11.276955602537  | 0.926925472285655  | 9            |
| 141                               | learning or memory                                         |                  |                    |              |
| GO:0050890                        | 7.54632827819174e-07                                       | 10.2565356856455 | 1.01238668604249   |              |
| 9                                 | 154 cognition                                              |                  |                    |              |
| GO:0007612                        | 7.66284453746082e-07                                       | 16.0043213828425 | 0.512767282541001  |              |
| 7                                 | 78 learning                                                |                  |                    |              |
| GO:0048167                        | 1.50178445608087e-05                                       | 12.8368539325843 | 0.532489101110027  |              |
| 6                                 | 81 regulation of synaptic plasticity                       |                  |                    |              |
| GO:0050804                        | 1.7989914108355e-05                                        | 7.90860327412052 | 1.13729153691786   |              |
| 8                                 | 173 regulation of synaptic transmission                    |                  |                    |              |
| GO:0051969                        | 3.14941270370074e-05                                       | 7.28286136261478 | 1.22932669019445   |              |
| 8                                 | 187 regulation of transmission of nerve impulse            |                  |                    |              |
| GO:0031644                        | 4.90265461726867e-05                                       | 6.81952217608473 | 1.30821396443153   |              |
| 8                                 | 199 regulation of neurological system process              |                  |                    |              |
| GO:0003001                        | 0.00023043956499334                                        | 4.78906900992349 | 2.07736488824303   |              |
| 9                                 | 316 generation of a signal involved in cell-cell signaling |                  |                    |              |
| GO:0023061                        | 0.00023043956499334                                        | 4.78906900992349 | 2.07736488824303   |              |
| 9                                 | 316 signal release                                         |                  |                    |              |
| GO:0007215                        | 0.000251762796820982                                       | 14.6312292358804 | 0.308975157428552  |              |
| 4                                 | 47 glutamate receptor signaling pathway                    |                  |                    |              |
| GO:0001504                        | 0.000443071924855114                                       | 23.3739130434783 | 0.151200608954398  |              |
| 3                                 | 23 neurotransmitter uptake                                 |                  |                    |              |
| GO:0021782                        | 0.000604910193909431                                       | 11.4293706293706 | 0.387862431665629  |              |
| 4                                 | 59 glial cell development                                  |                  |                    |              |
| GO:0007420                        | 0.000712119083303174                                       | 3.73838302444265 | 2.94512490485088   |              |
| 10                                | 448 brain development                                      |                  |                    |              |
| GO:0051932                        | 0.000800324303079237                                       | 18.6926086956522 | 0.18407030655318   |              |
| 3                                 | 28 synaptic transmission, GABAergic                        |                  |                    |              |
| GO:0034220                        | 0.000853027950025637                                       | 4.38293395675044 | 1.99190367448619   |              |
| 8                                 | 303 ion transmembrane transport                            |                  |                    |              |
| GO:0015824                        | 0.000878974733991001                                       | 61.7247311827957 | 0.0460175766382949 |              |

STable4\_20PerPair

|            |     |                                                                           |                  |                   |                    |
|------------|-----|---------------------------------------------------------------------------|------------------|-------------------|--------------------|
| 2          | 7   | proline transport                                                         |                  |                   |                    |
| GO:0008038 |     | 0.000888434997150001                                                      | 17.9724080267559 |                   | 0.190644246072936  |
| 3          | 29  | neuron recognition                                                        |                  |                   |                    |
| GO:0001508 |     | 0.000921715321858788                                                      | 7.26146788990826 |                   | 0.749429105252232  |
| 5          | 114 | regulation of action potential                                            |                  |                   |                    |
| GO:0016079 |     | 0.0009824687037171                                                        | 17.3055555555556 |                   | 0.197218185592693  |
| 3          | 30  | synaptic vesicle exocytosis                                               |                  |                   |                    |
| GO:0035235 |     | 0.0011669497299605                                                        | 51.4336917562724 |                   | 0.0525915161580513 |
| 2          | 8   | ionotropic glutamate receptor signaling pathway                           |                  |                   |                    |
| GO:0060384 |     | 0.0011669497299605                                                        | 51.4336917562724 |                   | 0.0525915161580513 |
| 2          | 8   | innervation                                                               |                  |                   |                    |
| GO:0007632 |     | 0.0014207979963508                                                        | 15.0683730715288 |                   | 0.223513943671718  |
| 3          | 34  | visual behavior                                                           |                  |                   |                    |
| GO:0007409 |     | 0.00149153115209424                                                       | 3.37190082644628 |                   | 3.24752612275967   |
| 10         | 494 | axonogenesis                                                              |                  |                   |                    |
| GO:0021692 |     | 0.00185944535970675                                                       | 38.5698924731183 |                   | 0.0657393951975642 |
| 2          | 10  | cerebellar Purkinje cell layer morphogenesis                              |                  |                   |                    |
| GO:0021694 |     | 0.00185944535970675                                                       | 38.5698924731183 |                   | 0.0657393951975642 |
| 2          | 10  | cerebellar Purkinje cell layer formation                                  |                  |                   |                    |
| GO:0021702 |     | 0.00185944535970675                                                       | 38.5698924731183 |                   | 0.0657393951975642 |
| 2          | 10  | cerebellar Purkinje cell differentiation                                  |                  |                   |                    |
| GO:0051580 |     | 0.00185944535970675                                                       | 38.5698924731183 |                   | 0.0657393951975642 |
| 2          | 10  | regulation of neurotransmitter uptake                                     |                  |                   |                    |
| GO:0048708 |     | 0.0021190320054723                                                        | 12.9710144927536 |                   | 0.2563836412705 3  |
| 39         |     | astrocyte differentiation                                                 |                  |                   |                    |
| GO:0014002 |     | 0.00226294172378252                                                       | 34.2819593787336 |                   | 0.0723133347173206 |
| 2          | 11  | astrocyte development                                                     |                  |                   |                    |
| GO:0022010 |     | 0.00226294172378252                                                       | 34.2819593787336 |                   | 0.0723133347173206 |
| 2          | 11  | central nervous system myelination                                        |                  |                   |                    |
| GO:0032291 |     | 0.00226294172378252                                                       | 34.2819593787336 |                   | 0.0723133347173206 |
| 2          | 11  | axon ensheathment in central nervous system                               |                  |                   |                    |
| GO:0019228 |     | 0.00226336961890837                                                       | 7.84395604395604 |                   | 0.552210919659539  |
| 4          | 84  | regulation of action potential in neuron                                  |                  |                   |                    |
| GO:0048168 |     | 0.0022800120647534                                                        | 12.6195652173913 |                   | 0.262957580790257  |
| 3          | 40  | regulation of neuronal synaptic plasticity                                |                  |                   |                    |
| GO:0007270 |     | 0.00268139628558388                                                       | 7.4683411826269  | 0.578506677738565 | 4                  |
| 88         |     | neuron-neuron synaptic transmission                                       |                  |                   |                    |
| GO:0043092 |     | 0.00270392915930431                                                       | 30.8516129032258 |                   | 0.078887274237077  |
| 2          | 12  | L-amino acid import                                                       |                  |                   |                    |
| GO:0042391 |     | 0.00273118996427797                                                       | 4.63074070033817 |                   | 1.39367517818836   |
| 6          | 212 | regulation of membrane potential                                          |                  |                   |                    |
| GO:0007193 |     | 0.00280774809709358                                                       | 11.670652173913  | 0.282679399349526 | 3                  |
| 43         |     | adenylate cyclase-inhibiting G-protein coupled receptor signaling pathway |                  |                   |                    |
| GO:0051952 |     | 0.00280774809709358                                                       | 11.670652173913  | 0.282679399349526 | 3                  |
| 43         |     | regulation of amine transport                                             |                  |                   |                    |
| GO:0043090 |     | 0.00318190779670647                                                       | 28.0449657869013 |                   | 0.0854612137568334 |
| 2          | 13  | amino acid import                                                         |                  |                   |                    |
| GO:0008306 |     | 0.00319799789027677                                                       | 11.1133540372671 |                   | 0.295827278389039  |
| 3          | 45  | associative learning                                                      |                  |                   |                    |
| GO:0048489 |     | 0.00384306604173459                                                       | 10.3702898550725 |                   | 0.315549096948308  |
| 3          | 48  | synaptic vesicle transport                                                |                  |                   |                    |
| GO:0031344 |     | 0.00407703421607728                                                       | 4.25321027287319 |                   | 1.51200608954398   |
| 6          | 230 | regulation of cell projection organization                                |                  |                   |                    |
| GO:0006865 |     | 0.00455770999128027                                                       | 6.39515586454362 |                   | 0.670541831015155  |
| 4          | 102 | amino acid transport                                                      |                  |                   |                    |
| GO:0021697 |     | 0.00483286445549882                                                       | 22.0307219662058 |                   | 0.105183032316103  |
| 2          | 16  | cerebellar cortex formation                                               |                  |                   |                    |
| GO:0021680 |     | 0.00545390522836393                                                       | 20.5605734767025 |                   | 0.111756971835859  |
| 2          | 17  | cerebellar Purkinje cell layer development                                |                  |                   |                    |
| GO:0051954 |     | 0.00545390522836393                                                       | 20.5605734767025 |                   | 0.111756971835859  |
| 2          | 17  | positive regulation of amine transport                                    |                  |                   |                    |
| GO:0001662 |     | 0.00610950951902399                                                       | 19.2741935483871 |                   | 0.118330911355616  |
| 2          | 18  | behavioral fear response                                                  |                  |                   |                    |

Stable4\_20PerPair

|                                   |                            |                                                                     |                   |
|-----------------------------------|----------------------------|---------------------------------------------------------------------|-------------------|
| GO:0060119                        | 0.00610950951902399        | 19.2741935483871                                                    | 0.118330911355616 |
| 2                                 | 18                         | inner ear receptor cell development                                 |                   |
| GO:0044057                        | 0.0061336734011772         | 3.13565466655425                                                    | 2.74133277973843  |
| 8                                 | 417                        | regulation of system process                                        |                   |
| GO:0002209                        | 0.00679920584201408        | 18.1391524351676                                                    | 0.124904850875372 |
| 2                                 | 19                         | behavioral defense response                                         |                   |
| GO:0015800                        | 0.00679920584201408        | 18.1391524351676                                                    | 0.124904850875372 |
| 2                                 | 19                         | acidic amino acid transport                                         |                   |
| GO:0015804                        | 0.00679920584201408        | 18.1391524351676                                                    | 0.124904850875372 |
| 2                                 | 19                         | neutral amino acid transport                                        |                   |
| GO:0021533                        | 0.00679920584201408        | 18.1391524351676                                                    | 0.124904850875372 |
| 2                                 | 19                         | cell differentiation in hindbrain                                   |                   |
| GO:0007616                        | 0.00752252730331821        | 17.1302270011947                                                    | 0.131478790395128 |
| 2                                 | 20                         | long-term memory                                                    |                   |
| GO:0021696                        | 0.00752252730331821        | 17.1302270011947                                                    | 0.131478790395128 |
| 2                                 | 20                         | cerebellar cortex morphogenesis                                     |                   |
| GO:0010975                        | 0.00797003349712608        | 4.302671523983                                                      | 1.23590062971421  |
| 188                               |                            | regulation of neuron projection development                         | 5                 |
| GO:0015807                        | 0.008279011561416          | 16.2275042444822                                                    | 0.138052729914885 |
| 2                                 | 21                         | L-amino acid transport                                              |                   |
| GO:0010001                        | 0.00902158742785589        | 5.21465201465201                                                    | 0.815168500449796 |
| 4                                 | 124                        | glial cell differentiation                                          |                   |
| GO:0042596                        | 0.00906820078863467        | 15.4150537634409                                                    | 0.144626669434641 |
| 2                                 | 22                         | fear response                                                       |                   |
| GO:0031345                        | 0.00973198144254681        | 7.28192934782609                                                    | 0.44045394782368  |
| 3                                 | 67                         | negative regulation of cell projection organization                 |                   |
| Tissue: Whole_Blood=>Nerve_Tibial |                            | Type: asymmetric                                                    |                   |
| SourceGene:                       | FAM184B(ENSG00000047662.4) |                                                                     |                   |
| TargetGeneSet:                    | RP11                       | RPS8                                                                | CTB               |
| IVNS1ABP                          | PLXNA2                     | XIRP2                                                               | KCTD18            |
| HNRNPAB                           | RPL15P3                    | HEBP2                                                               | PPP1R35           |
| GHITM                             | C10orf129                  |                                                                     | OR52N4            |
| H2AFJ                             | RPL18AP3                   |                                                                     | RPLP0             |
| C17orf103                         |                            | TCAP                                                                | SUPT4H1           |
| ZNF350                            | RPS5                       | FTLP3                                                               | PLTP              |
| GOBPID                            | Pvalue                     | OddsRatio                                                           | ExpCount          |
| GO:0006415                        | 9.45543999605251e-12       | 42.4874752801582                                                    | Count             |
| 9                                 | 91                         | translational termination                                           | Size              |
| GO:0019080                        | 3.39485264796329e-11       | 28.1008668242711                                                    | Term              |
| 10                                | 151                        | viral genome expression                                             |                   |
| GO:0019083                        | 3.39485264796329e-11       | 28.1008668242711                                                    | 0.289668535049478 |
| 10                                | 151                        | viral transcription                                                 |                   |
| GO:0006414                        | 3.50962897900514e-11       | 36.2559121621622                                                    | 0.480658777939243 |
| 9                                 | 105                        | translational elongation                                            |                   |
| GO:0006614                        | 3.50962897900514e-11       | 36.2559121621622                                                    | 0.480658777939243 |
| 9                                 | 105                        | SRP-dependent cotranslational protein targeting to membrane         |                   |
| GO:0006413                        | 3.62563997705517e-11       | 27.9010172143975                                                    | 0.334232925057089 |
| 10                                | 152                        | translational initiation                                            |                   |
| GO:0006613                        | 3.82638812841948e-11       | 35.8796322095291                                                    | 0.334232925057089 |
| 9                                 | 106                        | cotranslational protein targeting to membrane                       |                   |
| GO:0045047                        | 3.82638812841948e-11       | 35.8796322095291                                                    | 0.483841948654072 |
| 9                                 | 106                        | protein targeting to ER                                             |                   |
| GO:0072599                        | 3.82638812841948e-11       | 35.8796322095291                                                    | 0.337416095771919 |
| 9                                 | 106                        | establishment of protein localization to endoplasmic reticulum      |                   |
| GO:0006612                        | 3.87033476992069e-11       | 27.7039627039627                                                    | 0.337416095771919 |
| 10                                | 153                        | protein targeting to membrane                                       |                   |
| GO:0070972                        | 1.01321662815343e-10       | 31.9028018844533                                                    | 0.337416095771919 |
| 9                                 | 118                        | protein localization to endoplasmic reticulum                       |                   |
| GO:0000184                        | 1.09357799215139e-10       | 31.6105651105651                                                    | 0.487025119368902 |
| 9                                 | 119                        | nuclear-transcribed mRNA catabolic process, nonsense-mediated decay |                   |
| GO:0072594                        | 6.60160849558824e-10       | 20.3479381443299                                                    | 0.375614144349872 |
| 10                                | 204                        | establishment of protein localization to organelle                  |                   |
| GO:0006401                        | 6.92428979245824e-10       | 20.2421652421652                                                    | 0.378797315064701 |
|                                   |                            |                                                                     | 0.649366825825202 |
|                                   |                            |                                                                     | 0.652549996540032 |

STable4\_20PerPair

|                                                 |         |                                                  |                  |                     |           |         |          |         |                  |
|-------------------------------------------------|---------|--------------------------------------------------|------------------|---------------------|-----------|---------|----------|---------|------------------|
| 10                                              | 205     | RNA catabolic process                            |                  |                     |           |         |          |         |                  |
| GO:0043624                                      |         | 1.04085252522312e-09                             | 24.089527027027  | 0.487025119368902   |           |         |          |         | 9                |
| 153                                             |         | cellular protein complex disassembly             |                  |                     |           |         |          |         |                  |
| GO:0043241                                      |         | 1.38482698952076e-09                             | 23.2729911119173 | 0.502940972943049   |           |         |          |         |                  |
| 9                                               | 158     | protein complex disassembly                      |                  |                     |           |         |          |         |                  |
| GO:0019058                                      |         | 2.20880145392951e-09                             | 17.8280542986425 | 0.735312435125597   |           |         |          |         |                  |
| 10                                              | 231     | viral infectious cycle                           |                  |                     |           |         |          |         |                  |
| GO:0000956                                      |         | 2.51212482621704e-09                             | 21.65625         | 0.537955850806173   |           |         |          |         | 9                |
| 169                                             |         | nuclear-transcribed mRNA catabolic process       |                  |                     |           |         |          |         |                  |
| GO:0034623                                      |         | 3.24869864435553e-09                             | 20.992628992629  | 0.55387170438032    |           |         |          |         | 9                |
| 174                                             |         | cellular macromolecular complex disassembly      |                  |                     |           |         |          |         |                  |
| GO:0006402                                      |         | 3.96822887559517e-09                             | 20.4900047976971 | 0.566604387239637   |           |         |          |         |                  |
| 9                                               | 178     | mRNA catabolic process                           |                  |                     |           |         |          |         |                  |
| GO:0032984                                      |         | 4.16861405576208e-09                             | 20.3680445151033 | 0.569787557954467   |           |         |          |         |                  |
| 9                                               | 179     | macromolecular complex disassembly               |                  |                     |           |         |          |         |                  |
| GO:0022415                                      |         | 6.89585216681102e-09                             | 15.7277777777778 | 0.82762438585565    |           |         |          |         |                  |
| 10                                              | 260     | viral reproductive process                       |                  |                     |           |         |          |         |                  |
| GO:0006605                                      |         | 1.90497117833022e-08                             | 10.6516424751719 | 1.50882291882915    |           |         |          |         |                  |
| 12                                              | 474     | protein targeting                                |                  |                     |           |         |          |         |                  |
| GO:0033365                                      |         | 1.94678745871024e-07                             | 9.48503401360544 | 1.50563974811432    |           |         |          |         |                  |
| 11                                              | 473     | protein localization to organelle                |                  |                     |           |         |          |         |                  |
| GO:0071845                                      |         | 2.24471404131612e-07                             | 12.4982800982801 | 0.904020483011556   |           |         |          |         |                  |
| 9                                               | 284     | cellular component disassembly at cellular level |                  |                     |           |         |          |         |                  |
| GO:0022411                                      |         | 2.5267118288185e-07                              | 12.3156059285092 | 0.916753165870874   |           |         |          |         |                  |
| 9                                               | 288     | cellular component disassembly                   |                  |                     |           |         |          |         |                  |
| GO:0016032                                      |         | 1.18043890244333e-06                             | 8.79566641471403 | 1.43560999238807    |           |         |          |         |                  |
| 10                                              | 451     | viral reproduction                               |                  |                     |           |         |          |         |                  |
| GO:0071526                                      |         | 0.00115623520727482                              | 46.724025974026  | 0.0509307314372708  |           |         |          |         | 2                |
| 16                                              |         | semaphorin-plexin signaling pathway              |                  |                     |           |         |          |         |                  |
| GO:0042274                                      |         | 0.00146823796056917                              | 40.8778409090909 | 0.0572970728669296  |           |         |          |         |                  |
| 2                                               | 18      | ribosomal small subunit biogenesis               |                  |                     |           |         |          |         |                  |
| GO:0022613                                      |         | 0.00559728734870538                              | 6.11247575953458 | 0.71621341083662    |           |         |          |         |                  |
| 4                                               | 225     | ribonucleoprotein complex biogenesis             |                  |                     |           |         |          |         |                  |
| GO:0071843                                      |         | 0.00691069135170613                              | 5.74265450861196 | 0.760777800844232   |           |         |          |         |                  |
| 4                                               | 239     | cellular component biogenesis at cellular level  |                  |                     |           |         |          |         |                  |
| GO:0016056                                      |         | 0.00951980336629987                              | 160.033333333333 | 0.00954951214448827 |           |         |          |         |                  |
| 1                                               | 3       | rhodopsin mediated signaling pathway             |                  |                     |           |         |          |         |                  |
| GO:0030241                                      |         | 0.00951980336629987                              | 160.033333333333 | 0.00954951214448827 |           |         |          |         |                  |
| 1                                               | 3       | skeletal muscle myosin thick filament assembly   |                  |                     |           |         |          |         |                  |
| GO:0031034                                      |         | 0.00951980336629987                              | 160.033333333333 | 0.00954951214448827 |           |         |          |         |                  |
| 1                                               | 3       | myosin filament assembly                         |                  |                     |           |         |          |         |                  |
| GO:0035511                                      |         | 0.00951980336629987                              | 160.033333333333 | 0.00954951214448827 |           |         |          |         |                  |
| 1                                               | 3       | oxidative DNA demethylation                      |                  |                     |           |         |          |         |                  |
| GO:0048769                                      |         | 0.00951980336629987                              | 160.033333333333 | 0.00954951214448827 |           |         |          |         |                  |
| 1                                               | 3       | sarcomerogenesis                                 |                  |                     |           |         |          |         |                  |
| GO:0071688                                      |         | 0.00951980336629987                              | 160.033333333333 | 0.00954951214448827 |           |         |          |         |                  |
| 1                                               | 3       | striated muscle myosin thick filament assembly   |                  |                     |           |         |          |         |                  |
| Tissue: Whole_Blood=>Nerve_Tibial Type: cluster |         |                                                  |                  |                     |           |         |          |         |                  |
| SourceGene: GCHFR(ENSG00000137880.4)            |         |                                                  |                  |                     |           |         |          |         |                  |
| TargetGeneSet:                                  |         |                                                  |                  |                     |           |         |          |         |                  |
| UBE2E3                                          | KCTD18  | ZCCHC17                                          | UQCRH            | RBBP5               | TTC32     | NFU1    | TEX261   | RANBP2  | MZT2B            |
| SDAD1                                           | CTD     | SLC23A3                                          | TPRXL            | UBE2E1              | QARS      | FAM194A | EIF4G1   | RP11    | CEP135           |
| COX6C                                           | SPAG1   | PRRC2A                                           | C6orf226         |                     | C7orf59   | PPP1R35 | PUS7     | NOM1    | C8orf59          |
| NOLC1                                           | NUP98   | CTHRC1                                           | CCL19            | MSANTD3             | RALGAPA1P |         | FAM208B  | RRP12   | PPRC1            |
| DPAGT1                                          | TBCEL   | FXC1                                             | EIF3F            | RPL27A              | ALKBH3    | MRPL16  | GANAB    | FAU     | CNIH2            |
| RPS19P3                                         | RPS29   | ZCRB1                                            | MARCH9           | PXN                 | RLIMP1    | LPAR6   | OGFOD1P1 |         | DIAPH3           |
| COX4I1                                          | RP13    | GSTZ1                                            | IFI27L1          | IFI27               | SRP14     | MGA     | NDUFB10  | MIR4519 | NAE1             |
| ROMO1                                           | KRT18P4 | MYBBP1A                                          | RPAIN            | LIG3                | USP36     | NFIC    | RPL36    | ZNF85   | RPS19            |
| GOBPID                                          | Pvalue  | RAB22A                                           | BTG3             | URB1                | CBR3      | BCR     | RP3      | TIMP1   | SSR4             |
|                                                 |         | OddsRatio                                        | ExpCount         | Count               | Size      | Term    |          |         | DKC1             |
| GO:0033365                                      |         | 1.20134575662999e-07                             | 7.71743393009378 |                     |           |         |          |         | 2.09480312781122 |
| 13                                              | 473     | protein localization to organelle                |                  |                     |           |         |          |         |                  |
| GO:0006605                                      |         | 1.23108498008295e-07                             | 7.70014035983157 |                     |           |         |          |         | 2.09923188706664 |
| 13                                              | 474     | protein targeting                                |                  |                     |           |         |          |         |                  |

Stable4\_20PerPair

|            |                                                                     |                  |                    |
|------------|---------------------------------------------------------------------|------------------|--------------------|
| GO:0006612 | 3.52145543466475e-07                                                | 14.0315270935961 | 0.677600166078472  |
| 8 153      | protein targeting to membrane                                       |                  |                    |
| GO:0006614 | 3.86324505995467e-07                                                | 17.906015037594  | 0.465019721818559  |
| 105        | SRP-dependent cotranslational protein targeting to membrane         |                  | 7                  |
| GO:0006613 | 4.12211475722716e-07                                                | 17.7239057239057 | 0.469448481073974  |
| 7 106      | cotranslational protein targeting to membrane                       |                  |                    |
| GO:0045047 | 4.12211475722716e-07                                                | 17.7239057239057 | 0.469448481073974  |
| 7 106      | protein targeting to ER                                             |                  |                    |
| GO:0072599 | 4.12211475722716e-07                                                | 17.7239057239057 | 0.469448481073974  |
| 7 106      | establishment of protein localization to endoplasmic reticulum      |                  |                    |
| GO:0070972 | 8.55506659094507e-07                                                | 15.7945313734787 | 0.522593592138952  |
| 7 118      | protein localization to endoplasmic reticulum                       |                  |                    |
| GO:0072594 | 3.09035552486539e-06                                                | 10.3432944606414 | 0.903466888104629  |
| 8 204      | establishment of protein localization to organelle                  |                  |                    |
| GO:0006413 | 4.66368805778185e-06                                                | 12.0621899576528 | 0.673171406823057  |
| 7 152      | translational initiation                                            |                  |                    |
| GO:0006414 | 6.7893325699112e-06                                                 | 14.9299895506792 | 0.465019721818559  |
| 6 105      | translational elongation                                            |                  |                    |
| GO:0000184 | 1.39505800833643e-05                                                | 13.0674397314617 | 0.527022351394367  |
| 6 119      | nuclear-transcribed mRNA catabolic process, nonsense-mediated decay |                  |                    |
| GO:0006415 | 5.04180280683979e-05                                                | 14.0924320063067 | 0.403017092242751  |
| 5 91       | translational termination                                           |                  |                    |
| GO:0000956 | 0.000100130385091518                                                | 9.02729003596361 | 0.74846031416511   |
| 6 169      | nuclear-transcribed mRNA catabolic process                          |                  |                    |
| GO:0006402 | 0.000133143355828662                                                | 8.54951884522855 | 0.788319147463843  |
| 6 178      | mRNA catabolic process                                              |                  |                    |
| GO:0006401 | 0.000286379882659833                                                | 7.37549818055796 | 0.907895647360044  |
| 6 205      | RNA catabolic process                                               |                  |                    |
| GO:0019080 | 0.000541196550747747                                                | 8.26619456698398 | 0.668742647567642  |
| 5 151      | viral genome expression                                             |                  |                    |
| GO:0019083 | 0.000541196550747747                                                | 8.26619456698398 | 0.668742647567642  |
| 5 151      | viral transcription                                                 |                  |                    |
| GO:0043624 | 0.000574604898230805                                                | 8.15334402198809 | 0.677600166078472  |
| 5 153      | cellular protein complex disassembly                                |                  |                    |
| GO:0043241 | 0.000664906819794072                                                | 7.88412540157306 | 0.699743962355546  |
| 5 158      | protein complex disassembly                                         |                  |                    |
| GO:0022904 | 0.000856585958792658                                                | 10.3586956521739 | 0.425160888519826  |
| 4 96       | respiratory electron transport chain                                |                  |                    |
| GO:0034623 | 0.00102631382156598                                                 | 7.12967606057567 | 0.770604110442184  |
| 5 174      | cellular macromolecular complex disassembly                         |                  |                    |
| GO:0017038 | 0.00108468856513763                                                 | 5.66519647153168 | 1.16919244342952   |
| 6 264      | protein import                                                      |                  |                    |
| GO:0032984 | 0.00116456552965098                                                 | 6.92236508864212 | 0.792747906719258  |
| 5 179      | macromolecular complex disassembly                                  |                  |                    |
| GO:0006260 | 0.00117194164689777                                                 | 5.57712555935773 | 1.18690748045118   |
| 6 268      | DNA replication                                                     |                  |                    |
| GO:0071845 | 0.00157605540551523                                                 | 5.25018605805011 | 1.25776762853782   |
| 6 284      | cellular component disassembly at cellular level                    |                  |                    |
| GO:0022411 | 0.00169194020664487                                                 | 5.17424798239178 | 1.27548266555948   |
| 6 288      | cellular component disassembly                                      |                  |                    |
| GO:0006606 | 0.00170061809690906                                                 | 6.33229259589652 | 0.863608054805896  |
| 5 195      | protein import into nucleus                                         |                  |                    |
| GO:0051170 | 0.00181844717923496                                                 | 6.23254588565908 | 0.87689433257214   |
| 5 198      | nuclear import                                                      |                  |                    |
| GO:0001522 | 0.00251577557013646                                                 | 30.9075268817204 | 0.0752889073420525 |
| 2 17       | pseudouridine synthesis                                             |                  |                    |
| GO:0006913 | 0.00278049316678448                                                 | 4.66677718832891 | 1.40834544322192   |
| 6 318      | nucleocytoplasmic transport                                         |                  |                    |
| GO:0051169 | 0.00291287820909797                                                 | 4.62134646962233 | 1.42163172098817   |
| 6 321      | nuclear transport                                                   |                  |                    |
| GO:0022900 | 0.00292135387194807                                                 | 7.31128205128205 | 0.59345374022559   |
| 4 134      | electron transport chain                                            |                  |                    |
| GO:0034504 | 0.00298785610276722                                                 | 5.53385925173787 | 0.983184554702097  |

Stable4\_20PerPair

|                                |                             |                                                                    |                  |                   |          |          |         |                   |           |
|--------------------------------|-----------------------------|--------------------------------------------------------------------|------------------|-------------------|----------|----------|---------|-------------------|-----------|
| 5                              | 222                         | protein localization to nucleus                                    |                  |                   |          |          |         |                   |           |
| GO:0022613                     |                             | 0.00316502475062341                                                | 5.45724191063174 |                   |          |          |         | 0.996470832468341 |           |
| 5                              | 225                         | ribonucleoprotein complex biogenesis                               |                  |                   |          |          |         |                   |           |
| GO:0019058                     |                             | 0.00354197520513652                                                | 5.31010949452527 |                   |          |          |         | 1.02304338800083  |           |
| 5                              | 231                         | viral infectious cycle                                             |                  |                   |          |          |         |                   |           |
| GO:0045333                     |                             | 0.0035975749800384                                                 | 6.88357487922705 |                   |          |          |         | 0.628883814268909 |           |
| 4                              | 142                         | cellular respiration                                               |                  |                   |          |          |         |                   |           |
| GO:0016032                     |                             | 0.00368654062782827                                                | 3.85652758021179 |                   |          |          |         | 1.9973704241921   | 7         |
| 451                            |                             | viral reproduction                                                 |                  |                   |          |          |         |                   |           |
| GO:0071843                     |                             | 0.00409356502531015                                                | 5.12566999855135 |                   |          |          |         | 1.05847346204415  |           |
| 5                              | 239                         | cellular component biogenesis at cellular level                    |                  |                   |          |          |         |                   |           |
| GO:0042254                     |                             | 0.00427061379286768                                                | 6.54804597701149 |                   |          |          |         | 0.659885129056813 |           |
| 4                              | 149                         | ribosome biogenesis                                                |                  |                   |          |          |         |                   |           |
| GO:0022415                     |                             | 0.00583111270544326                                                | 4.69657693585909 |                   |          |          |         | 1.15147740640786  |           |
| 5                              | 260                         | viral reproductive process                                         |                  |                   |          |          |         |                   |           |
| GO:0034660                     |                             | 0.00851298648710429                                                | 4.26967312348668 |                   |          |          |         | 1.26219638779323  |           |
| 5                              | 285                         | ncRNA metabolic process                                            |                  |                   |          |          |         |                   |           |
| Tissue:                        | whole_Blood=>Nerve_Tibial   | Type:                                                              | cluster          |                   |          |          |         |                   |           |
| SourceGene:                    | MTND2P28(ENSG00000225630.1) |                                                                    |                  |                   |          |          |         |                   |           |
| TargetGeneSet:                 | MTND1P23                    | ZNF593                                                             | RP11             | WASF2             | LSM10    | MACF1    | LEPRE1  | EVI5              |           |
| PBXIP1                         | TKT                         | PRRC2C                                                             | TOR1AIP1         | OR11L1            | TSSC1    | EPT1     | C1D     | GMCL1             |           |
| PRADC1                         | MOGS                        | REG1B                                                              | REG1A            | REG3A             | C2orf55  | EIF5B    | SCN9A   | UBE2V1            | UBE2E3    |
| FBXO36                         | CRTAP                       | SEC22C                                                             | NDUFAB3          | AMT               | SEMA3B   | C3orf45  | PCBP4   | PRICKLE2          | ATG3      |
| NDUFB4                         | SHOX2                       | PDCD10                                                             | SEC62            | TNK2              | RAB28    | CCNI     | ENOPH1  | DNAJB14           | AP1AR     |
| AADAT                          | PDCD6                       | MYO10                                                              | ITGA2            | SREK1IP1          |          | FAM174A  | CTB     | MTND5P11          |           |
| HCG11                          | HNRNPC                      | MTRNR2L9                                                           |                  | ATG5              | HDAC2    | SFT2D1   | PSMB1   | STARD3NL          |           |
| PPP1R35                        | TRIM56                      | POLR2J                                                             | ARMC10           | PSMC2             | FAM3C    | PRSS3P1  | PRSS3P2 | DRP2              | PABPC1    |
| PUF60                          | EXOSC4                      | NFIB                                                               | PRSS3            | SPTLC1            | PSMB7    | RABEPK   | DNM1    | WDR34             | GPSM1     |
| DCLRE1C                        | PRINS                       | RBP4                                                               | PGAM1            | MRPL43            | PNLIPRP1 |          | TOLLIP  | MTRNR2L8          |           |
| PDE3B                          | AMBRA1                      | POLR2G                                                             | ANKRD13D         |                   | SPCS2    | ANGPTL5  | CWF19L2 | SIDT2             | C12orf39  |
| TWF1                           | ACVR1B                      | RPL14P1                                                            | CPM              | RAN               | MPHOSPH8 |          | MRP63   | POMP              | RPL13AP25 |
| MRPL52                         | PSME2                       | PSMA3                                                              | ITPK1            | SIVA1             | AHNAK2   | GOLGA8IP |         | ITGA11            | ADAMTSL3  |
| CIB1                           | RHBDF1                      | MRPL28                                                             | CCP110           | ITFG1             | KATNB1   | ZFHX3    | CTRB2   | CTRB1             | TMEM231   |
| PSMB6                          | TXNDC17                     | TRAPPC1                                                            | NCOR1            | ERAL1             | PSMB3    | STAT5A   | MAPT    | ATP5G1            | SLC35B1   |
| CHMP6                          | CTD                         | AATK                                                               | SNRPD1           | RPRD1A            | C18orf32 |          | LMAN1   | SERPINB3          |           |
| WDR18                          | NFIC                        | PIN1                                                               | OLFM2            | SHKBP1            | IDH3B    | MRPS26   | ADRM1   | RANBP1            | CTA       |
| ZMAT5                          | ATXN10                      | HSD17B10                                                           |                  | RP1               | DOCK11   | RBMX2    | PHF6    | MT                |           |
| GOBPID                         | Pvalue                      | OddsRatio                                                          | ExpCount         |                   |          | Count    | Size    | Term              |           |
| GO:0009308                     |                             | 3.2300547524198e-07                                                | 7.43631578947368 |                   |          |          |         | 1.84513182478721  |           |
| 12                             | 202                         | amine metabolic process                                            |                  |                   |          |          |         |                   |           |
| GO:0051443                     |                             | 7.9144848636653e-07                                                | 12.4193548387097 |                   |          |          |         | 0.749013909072037 |           |
| 8                              | 82                          | positive regulation of ubiquitin-protein ligase activity           |                  |                   |          |          |         |                   |           |
| GO:0006521                     |                             | 8.17606168415014e-07                                               | 15.98128         | 0.520656009964708 |          |          |         |                   | 7         |
| 57                             |                             | regulation of cellular amino acid metabolic process                |                  |                   |          |          |         |                   |           |
| GO:0044106                     |                             | 9.11107806810204e-07                                               | 7.47727272727273 |                   |          |          |         | 1.67157982146564  |           |
| 11                             | 183                         | cellular amine metabolic process                                   |                  |                   |          |          |         |                   |           |
| GO:0051351                     |                             | 1.14279621976077e-06                                               | 11.7791563275434 |                   |          |          |         | 0.785551172929209 |           |
| 8                              | 86                          | positive regulation of ligase activity                             |                  |                   |          |          |         |                   |           |
| GO:0031397                     |                             | 1.91496597064058e-06                                               | 10.9331797235023 |                   |          |          |         | 0.840357068714968 |           |
| 8                              | 92                          | negative regulation of protein ubiquitination                      |                  |                   |          |          |         |                   |           |
| GO:0000209                     |                             | 2.16587899756182e-06                                               | 7.69080447291282 |                   |          |          |         | 1.47062487025119  |           |
| 10                             | 161                         | protein polyubiquitination                                         |                  |                   |          |          |         |                   |           |
| GO:0006977                     |                             | 2.24967712570452e-06                                               | 13.5349152542373 |                   |          |          |         | 0.602864853643347 |           |
| 7                              | 66                          | DNA damage response, signal transduction by p53 class mediator     |                  |                   |          |          |         |                   |           |
| resulting in cell cycle arrest |                             |                                                                    |                  |                   |          |          |         |                   |           |
| GO:0072413                     |                             | 2.24967712570452e-06                                               | 13.5349152542373 |                   |          |          |         | 0.602864853643347 |           |
| 7                              | 66                          | signal transduction involved in mitotic cell cycle checkpoint      |                  |                   |          |          |         |                   |           |
| GO:0072431                     |                             | 2.24967712570452e-06                                               | 13.5349152542373 |                   |          |          |         | 0.602864853643347 |           |
| 7                              | 66                          | signal transduction involved in mitotic cell cycle G1/S transition |                  |                   |          |          |         |                   |           |
| DNA damage checkpoint          |                             |                                                                    |                  |                   |          |          |         |                   |           |
| GO:0072474                     |                             | 2.24967712570452e-06                                               | 13.5349152542373 |                   |          |          |         | 0.602864853643347 |           |
| 7                              | 66                          | signal transduction involved in mitotic cell cycle G1/S checkpoint |                  |                   |          |          |         |                   |           |
| GO:0051436                     |                             | 2.49319001535254e-06                                               | 13.3084          | 0.61199916960764  |          |          |         | 7                 | 67        |

Stable4\_20PerPair

|            |                                                                                         |                                                                                                 |                  |                   |   |    |
|------------|-----------------------------------------------------------------------------------------|-------------------------------------------------------------------------------------------------|------------------|-------------------|---|----|
|            | negative regulation of ubiquitin-protein ligase activity involved in mitotic cell cycle |                                                                                                 |                  |                   |   |    |
| GO:0072401 |                                                                                         | 2.49319001535254e-06                                                                            | 13.3084          | 0.61199916960764  | 7 | 67 |
|            | signal transduction involved in DNA integrity checkpoint                                |                                                                                                 |                  |                   |   |    |
| GO:0072404 |                                                                                         | 2.49319001535254e-06                                                                            | 13.3084          | 0.61199916960764  | 7 | 67 |
|            | signal transduction involved in G1/S transition checkpoint                              |                                                                                                 |                  |                   |   |    |
| GO:0072422 |                                                                                         | 2.49319001535254e-06                                                                            | 13.3084          | 0.61199916960764  | 7 | 67 |
|            | signal transduction involved in DNA damage checkpoint                                   |                                                                                                 |                  |                   |   |    |
| GO:0051438 |                                                                                         | 2.64597126997556e-06                                                                            | 10.433284457478  | 0.87689433257214  |   | 8  |
| 96         | regulation of ubiquitin-protein ligase activity                                         |                                                                                                 |                  |                   |   |    |
| GO:0072395 |                                                                                         | 2.75833066532783e-06                                                                            | 13.0893114754098 | 0.621133485571933 |   |    |
| 7          | 68                                                                                      | signal transduction involved in cell cycle checkpoint                                           |                  |                   |   |    |
| GO:0051340 |                                                                                         | 3.60160964550797e-06                                                                            | 9.97685834502104 | 0.913431596429313 |   |    |
| 8          | 100                                                                                     | regulation of ligase activity                                                                   |                  |                   |   |    |
| GO:0033238 |                                                                                         | 4.06638598950683e-06                                                                            | 12.2803692307692 | 0.657670749429105 |   |    |
| 7          | 72                                                                                      | regulation of cellular amine metabolic process                                                  |                  |                   |   |    |
| GO:0051352 |                                                                                         | 4.06638598950683e-06                                                                            | 12.2803692307692 | 0.657670749429105 |   |    |
| 7          | 72                                                                                      | negative regulation of ligase activity                                                          |                  |                   |   |    |
| GO:0051437 |                                                                                         | 4.06638598950683e-06                                                                            | 12.2803692307692 | 0.657670749429105 |   |    |
| 7          | 72                                                                                      | positive regulation of ubiquitin-protein ligase activity involved in mitotic cell cycle         |                  |                   |   |    |
| GO:0051444 |                                                                                         | 4.06638598950683e-06                                                                            | 12.2803692307692 | 0.657670749429105 |   |    |
| 7          | 72                                                                                      | negative regulation of ubiquitin-protein ligase activity                                        |                  |                   |   |    |
| GO:0031571 |                                                                                         | 4.46375747690041e-06                                                                            | 12.0934545454545 | 0.666805065393398 |   |    |
| 7          | 73                                                                                      | mitotic cell cycle G1/S transition DNA damage checkpoint                                        |                  |                   |   |    |
| GO:0002479 |                                                                                         | 5.35595246197984e-06                                                                            | 11.7361176470588 | 0.685073697321985 |   |    |
| 7          | 75                                                                                      | antigen processing and presentation of exogenous peptide antigen via MHC class I, TAP-dependent |                  |                   |   |    |
| GO:0051439 |                                                                                         | 6.9690287729351e-06                                                                             | 11.2378591549296 | 0.712476645214864 |   |    |
| 7          | 78                                                                                      | regulation of ubiquitin-protein ligase activity involved in mitotic cell cycle                  |                  |                   |   |    |
| GO:0000216 |                                                                                         | 7.58894447175862e-06                                                                            | 11.081           | 0.721610961179157 | 7 | 79 |
|            | M/G1 transition of mitotic cell cycle                                                   |                                                                                                 |                  |                   |   |    |
| GO:0042590 |                                                                                         | 7.58894447175862e-06                                                                            | 11.081           | 0.721610961179157 | 7 | 79 |
|            | antigen processing and presentation of exogenous peptide antigen via MHC class I        |                                                                                                 |                  |                   |   |    |
| GO:0071158 |                                                                                         | 8.25397729617176e-06                                                                            | 10.9284383561644 | 0.73074527714345  |   |    |
| 7          | 80                                                                                      | positive regulation of cell cycle arrest                                                        |                  |                   |   |    |
| GO:0031575 |                                                                                         | 9.72969962179052e-06                                                                            | 10.63552         | 0.749013909072037 |   | 7  |
| 82         | mitotic cell cycle G1/S transition checkpoint                                           |                                                                                                 |                  |                   |   |    |
| GO:0002478 |                                                                                         | 1.0545797823155e-05                                                                             | 10.4948421052632 | 0.75814822503633  |   |    |
| 7          | 83                                                                                      | antigen processing and presentation of exogenous peptide antigen                                |                  |                   |   |    |
| GO:0031145 |                                                                                         | 1.0545797823155e-05                                                                             | 10.4948421052632 | 0.75814822503633  |   |    |
| 7          | 83                                                                                      | anaphase-promoting complex-dependent proteasomal ubiquitin-dependent protein catabolic process  |                  |                   |   |    |
| GO:0019884 |                                                                                         | 1.2348780939804e-05                                                                             | 10.2243076923077 | 0.776416856964916 |   |    |
| 7          | 85                                                                                      | antigen processing and presentation of exogenous antigen                                        |                  |                   |   |    |
| GO:0071779 |                                                                                         | 1.33417162947446e-05                                                                            | 10.0941772151899 | 0.785551172929209 |   |    |
| 7          | 86                                                                                      | G1/S transition checkpoint                                                                      |                  |                   |   |    |
| GO:0031398 |                                                                                         | 2.11135326875629e-05                                                                            | 7.69856329628626 | 1.16005812746523  |   |    |
| 8          | 127                                                                                     | positive regulation of protein ubiquitination                                                   |                  |                   |   |    |
| GO:0031396 |                                                                                         | 2.33881804703795e-05                                                                            | 6.51633686148182 | 1.53456508200125  |   |    |
| 9          | 168                                                                                     | regulation of protein ubiquitination                                                            |                  |                   |   |    |
| GO:0000084 |                                                                                         | 3.1117553475766e-05                                                                             | 7.26728110599078 | 1.22399833921528  |   |    |
| 8          | 134                                                                                     | S phase of mitotic cell cycle                                                                   |                  |                   |   |    |
| GO:0002474 |                                                                                         | 3.3505884625402e-05                                                                             | 8.65991304347826 | 0.90429728046502  |   |    |
| 7          | 99                                                                                      | antigen processing and presentation of peptide antigen via MHC class I                          |                  |                   |   |    |
| GO:2000045 |                                                                                         | 3.3505884625402e-05                                                                             | 8.65991304347826 | 0.90429728046502  |   |    |
| 7          | 99                                                                                      | regulation of G1/S transition of mitotic cell cycle                                             |                  |                   |   |    |
| GO:0051320 |                                                                                         | 4.9546107212198e-05                                                                             | 6.77849462365591 | 1.30620718289392  |   |    |
| 8          | 143                                                                                     | S phase                                                                                         |                  |                   |   |    |
| GO:0048002 |                                                                                         | 5.86332202170577e-05                                                                            | 7.88324752475248 | 0.986506124143658 |   |    |
| 7          | 108                                                                                     | antigen processing and presentation of peptide antigen                                          |                  |                   |   |    |

Stable4\_20PerPair

|            |                                                                                      |                              |                    |
|------------|--------------------------------------------------------------------------------------|------------------------------|--------------------|
| GO:0090068 | 7.28366097597503e-05                                                                 | 6.39566884728175             | 1.37928171060826   |
| 8 151      | positive regulation of cell cycle process                                            |                              |                    |
| GO:0030330 | 9.74419026646147e-05                                                                 | 7.23367272727273             | 1.0687149678223 7  |
| 117        | DNA damage response, signal transduction by p53 class mediator                       |                              |                    |
| GO:0072331 | 0.000133376112443408                                                                 | 6.85662068965517             | 1.12352086360805   |
| 7 123      | signal transduction by p53 class mediator                                            |                              |                    |
| GO:0008380 | 0.000183354386938273                                                                 | 4.08129370629371             | 2.95038405646668   |
| 11 323     | RNA splicing                                                                         |                              |                    |
| GO:0000077 | 0.000188178727971676                                                                 | 6.46321951219512             | 1.18746107535811   |
| 7 130      | DNA damage checkpoint                                                                |                              |                    |
| GO:0031570 | 0.000248492339210058                                                                 | 6.16 1.24226697114387        | 7 136              |
|            | DNA integrity checkpoint                                                             |                              |                    |
| GO:0007093 | 0.000284007391518704                                                                 | 6.01872727272727             | 1.26966991903674   |
| 7 139      | mitotic cell cycle checkpoint                                                        |                              |                    |
| GO:0042770 | 0.000296713203023757                                                                 | 5.97305263157895             | 1.27880423500104   |
| 7 140      | signal transduction in response to DNA damage                                        |                              |                    |
| GO:0000082 | 0.000306677544547471                                                                 | 5.12540775643349             | 1.69898276935852   |
| 8 186      | G1/S transition of mitotic cell cycle                                                |                              |                    |
| GO:2000602 | 0.000399011227893075                                                                 | 5.6716 1.34274444675109      | 7 147              |
|            | regulation of interphase of mitotic cell cycle                                       |                              |                    |
| GO:0007346 | 0.0004637358429957                                                                   | 3.92379566944553             | 2.76769773718082   |
| 10 303     | regulation of mitotic cell cycle                                                     |                              |                    |
| GO:0019882 | 0.000488022457234222                                                                 | 5.47409655172414             | 1.38841602657256   |
| 7 152      | antigen processing and presentation                                                  |                              |                    |
| GO:0010565 | 0.000527778174940012                                                                 | 5.39885714285714             | 1.40668465850114   |
| 7 154      | regulation of cellular ketone metabolic process                                      |                              |                    |
| GO:0006103 | 0.00064857552590479                                                                  | 20.7892441860465             | 0.173552003321569  |
| 3 19       | 2-oxoglutarate metabolic process                                                     |                              |                    |
| GO:0006520 | 0.000662694940194059                                                                 | 3.26917647058824             | 3.9916960763961 12 |
| 437        | cellular amino acid metabolic process                                                |                              |                    |
| GO:0010498 | 0.0008253890747478                                                                   | 4.37686104218362             | 1.97301224828732   |
| 8 216      | proteasomal protein catabolic process                                                |                              |                    |
| GO:0016032 | 0.00087261490862344                                                                  | 3.16173120728929             | 4.1195764998962 12 |
| 451        | viral reproduction                                                                   |                              |                    |
| GO:0006397 | 0.00107896583633829                                                                  | 3.26405810684161             | 3.64459206975296   |
| 11 399     | mRNA processing                                                                      |                              |                    |
| GO:0070534 | 0.00115415851015086                                                                  | 16.6267441860465             | 0.210089267178742  |
| 3 23       | protein K63-linked ubiquitination                                                    |                              |                    |
| GO:0043248 | 0.00168753685903514                                                                  | 44.0430769230769             | 0.0639402117500519 |
| 2 7        | proteasome assembly                                                                  |                              |                    |
| GO:0051329 | 0.00250295854651677                                                                  | 3.09876049580168             | 3.4619057504671 10 |
| 379        | interphase of mitotic cell cycle                                                     |                              |                    |
| GO:0006370 | 0.00252543883506868                                                                  | 12.3100775193798             | 0.274029478928794  |
| 3 30       | 7-methylguanosine mRNA capping                                                       |                              |                    |
| GO:0000377 | 0.00268690710758518                                                                  | 4.01437563451777             | 1.8634004567158 7  |
| 204        | RNA splicing, via transesterification reactions with bulged adenosine as nucleophile |                              |                    |
| GO:0000398 | 0.00268690710758518                                                                  | 4.01437563451777             | 1.8634004567158 7  |
| 204        | nuclear mRNA splicing, via spliceosome                                               |                              |                    |
| GO:0051325 | 0.00290852238268156                                                                  | 3.03126494760186             | 3.53498027818144   |
| 10 387     | interphase                                                                           |                              |                    |
| GO:0000375 | 0.0030741047744301                                                                   | 3.91362376237624             | 1.90907203653726   |
| 7 209      | RNA splicing, via transesterification reactions                                      |                              |                    |
| GO:0043161 | 0.0030741047744301                                                                   | 3.91362376237624             | 1.90907203653726   |
| 7 209      | proteasomal ubiquitin-dependent protein catabolic process                            |                              |                    |
| GO:0009452 | 0.00332683107053226                                                                  | 11.0767441860465             | 0.301432426821673  |
| 3 33       | 7-methylguanosine RNA capping                                                        |                              |                    |
| GO:0036260 | 0.00332683107053226                                                                  | 11.0767441860465             | 0.301432426821673  |
| 3 33       | RNA capping                                                                          |                              |                    |
| GO:0022617 | 0.00426786976508781                                                                  | 10.0676532769556             | 0.328835374714553  |
| 3 36       | extracellular matrix disassembly                                                     |                              |                    |
| GO:0006368 | 0.00513762425203364                                                                  | 6.18359375 0.694208013286278 | 4                  |
| 76         | transcription elongation from RNA polymerase II promoter                             |                              |                    |



Stable4\_20PerPair

|                                   |                          |                                                                                      |                    |         |          |          |          |          |          |
|-----------------------------------|--------------------------|--------------------------------------------------------------------------------------|--------------------|---------|----------|----------|----------|----------|----------|
| GO:0000460                        | 0.00514729089384574      | 22.0138461538462                                                                     | 0.109611791571518  |         |          |          |          |          |          |
| 2                                 | 12                       | maturation of 5.8S rRNA                                                              |                    |         |          |          |          |          |          |
| GO:0031400                        | 0.00628679521827653      | 3.09920459566947                                                                     | 2.74029478928794   |         |          |          |          |          |          |
| 8                                 | 300                      | negative regulation of protein modification process                                  |                    |         |          |          |          |          |          |
| GO:0000075                        | 0.00680008138583364      | 3.35618723404255                                                                     | 2.21050446335894   |         |          |          |          |          |          |
| 7                                 | 242                      | cell cycle checkpoint                                                                |                    |         |          |          |          |          |          |
| GO:0031112                        | 0.00804353459532168      | 16.9301775147929                                                                     | 0.137014739464397  |         |          |          |          |          |          |
| 2                                 | 15                       | positive regulation of microtubule polymerization or depolymerization                |                    |         |          |          |          |          |          |
| GO:0006283                        | 0.00849285001853911      | 7.72093023255814                                                                     | 0.420178534357484  |         |          |          |          |          |          |
| 3                                 | 46                       | transcription-coupled nucleotide-excision repair                                     |                    |         |          |          |          |          |          |
| GO:2000243                        | 0.00893067385808007      | 5.23308823529412                                                                     | 0.812954120822088  |         |          |          |          |          |          |
| 4                                 | 89                       | positive regulation of reproductive process                                          |                    |         |          |          |          |          |          |
| GO:0032886                        | 0.009640765345223        | 5.11206896551724                                                                     | 0.831222752750675  |         |          |          |          |          |          |
| 4                                 | 91                       | regulation of microtubule-based process                                              |                    |         |          |          |          |          |          |
| Tissue: whole_Blood=>Nerve_Tibial |                          | Type: asymmetric                                                                     |                    |         |          |          |          |          |          |
| SourceGene:                       | NEK6(ENSG00000119408.11) |                                                                                      |                    |         |          |          |          |          |          |
| TargetGeneSet:                    | RNF19B                   | KCNQ4                                                                                | OSBPL9             | LPHN2   | CAPZA1   | VPS45    | DARC     | NUF2     | RP11     |
| TOMM20                            | TP53I3                   | FAM179A                                                                              | ACTR2              | PCBP1   | PKP4     | CCDC141  | SH3BP5   | KIAA1143 |          |
| WDR82P1                           | ALDH1L1-AS1              | AFAP1                                                                                | RELL1              | IL8     | SEPT11   | TBCK     | RAB33B   | PTGER4   |          |
| SCAMP1                            | POU5F2                   | H2AFJ                                                                                | PCDHB4             | ZNF165  | C6orf203 | GNAI1    | ORAI2    | THAP5    |          |
| AKR1B10                           | SOX7                     | UBXN8                                                                                | GPR124             | LSM1    | SNAI2    | KIAA1432 | GALT     | FAM214B  |          |
| RAPGEF1                           | ZNF438                   | HNRNPF                                                                               | CHCHD1             | EMILIN3 | ZNF518A  | HOGA1    | FAM196A  | SF3B2    | LRP5     |
| MSANTD4                           | MCAM                     | ESAM                                                                                 | PKNOX2             | APPL2   | WBP11    | ABCD2    | RACGAP1  | PCBP2    | SLC7A1   |
| MTRF1                             | EFNB2                    | MYH6                                                                                 | BATF               | IRF2BPL | RPS2P4   | CTD      | SNUPN    | BLM      | CDR2     |
| TSNAXIP1                          |                          | TERF2                                                                                | CMIP               | GALNS   | ARHGAP23 |          | C17orf98 |          | LRRC37A3 |
| SYNGR2                            | ARHGDI4                  | FN3K                                                                                 | ATP8B1             | POLR2E  | LRG1     | SEMA6B   | KHSRP    | HNRNPUL1 |          |
| SIGLEC10                          |                          | CRLS1                                                                                | TSHZ2              | ERG     | ICOSLG   | CLTCL1   | CCDC116  | RP1      | CSF2RB   |
| SMCR7L                            | CXorf36                  | RPSAP14                                                                              | PCDH19             | IDS     |          |          |          |          |          |
| GOBPID                            | Pvalue                   | OddsRatio                                                                            | ExpCount           | Count   | Size     | Term     |          |          |          |
| GO:0000375                        | 1.95112202809718e-07     | 10.3218993518316                                                                     | 1.14255068853367   |         |          |          |          |          |          |
| 10                                | 209                      | RNA splicing, via transesterification reactions                                      |                    |         |          |          |          |          |          |
| GO:0008380                        | 1.36842157637575e-06     | 7.28978129713424                                                                     | 1.76576015500657   |         |          |          |          |          |          |
| 11                                | 323                      | RNA splicing                                                                         |                    |         |          |          |          |          |          |
| GO:0006397                        | 1.037040984638e-05       | 5.83020012128563                                                                     | 2.18123313265518   |         |          |          |          |          |          |
| 11                                | 399                      | mRNA processing                                                                      |                    |         |          |          |          |          |          |
| GO:0000377                        | 1.52014142646623e-05     | 8.14946823799943                                                                     | 1.11521694000415   |         |          |          |          |          |          |
| 8                                 | 204                      | RNA splicing, via transesterification reactions with bulged adenosine as nucleophile |                    |         |          |          |          |          |          |
| GO:0000398                        | 1.52014142646623e-05     | 8.14946823799943                                                                     | 1.11521694000415   |         |          |          |          |          |          |
| 8                                 | 204                      | nuclear mRNA splicing, via spliceosome                                               |                    |         |          |          |          |          |          |
| GO:2000104                        | 0.00187962251482867      | 37.3038961038961                                                                     | 0.0656009964708325 |         |          |          |          |          |          |
| 2                                 | 12                       | negative regulation of DNA-dependent DNA replication                                 |                    |         |          |          |          |          |          |
| GO:0071775                        | 0.00221351136977795      | 33.9102715466352                                                                     | 0.0710677461767352 |         |          |          |          |          |          |
| 2                                 | 13                       | regulation of cell cycle cytokinesis                                                 |                    |         |          |          |          |          |          |
| GO:0071777                        | 0.00221351136977795      | 33.9102715466352                                                                     | 0.0710677461767352 |         |          |          |          |          |          |
| 2                                 | 13                       | positive regulation of cell cycle cytokinesis                                        |                    |         |          |          |          |          |          |
| GO:0032467                        | 0.00295868824346752      | 28.6893106893107                                                                     | 0.0820012455885406 |         |          |          |          |          |          |
| 2                                 | 15                       | positive regulation of cytokinesis                                                   |                    |         |          |          |          |          |          |
| GO:0090329                        | 0.00634996031081422      | 18.638961038961                                                                      | 0.12026849352986   | 2       |          |          |          |          |          |
| 22                                |                          | regulation of DNA-dependent DNA replication                                          |                    |         |          |          |          |          |          |
| GO:0060444                        | 0.00693020683008556      | 17.7501546072975                                                                     | 0.125735243235762  |         |          |          |          |          |          |
| 2                                 | 23                       | branching involved in mammary gland duct morphogenesis                               |                    |         |          |          |          |          |          |
| GO:0045600                        | 0.00753359074695003      | 16.9421487603306                                                                     | 0.131201992941665  |         |          |          |          |          |          |
| 2                                 | 24                       | positive regulation of fat cell differentiation                                      |                    |         |          |          |          |          |          |
| GO:0006200                        | 0.00800599764520436      | 7.83991228070175                                                                     | 0.410006227942703  |         |          |          |          |          |          |
| 3                                 | 75                       | ATP catabolic process                                                                |                    |         |          |          |          |          |          |
| GO:0032465                        | 0.00815984834055658      | 16.2044042913608                                                                     | 0.136668742647568  |         |          |          |          |          |          |
| 2                                 | 25                       | regulation of cytokinesis                                                            |                    |         |          |          |          |          |          |
| GO:0030278                        | 0.00816878626080113      | 5.3828841607565                                                                      | 0.792678707355892  | 4       |          |          |          |          |          |
| 145                               |                          | regulation of ossification                                                           |                    |         |          |          |          |          |          |
| Tissue: whole_Blood=>Nerve_Tibial |                          | Type: cluster                                                                        |                    |         |          |          |          |          |          |
| SourceGene:                       | NEK6(ENSG00000119408.11) |                                                                                      |                    |         |          |          |          |          |          |

Stable4\_20PerPair

| TargetGeneSet:  | RNF19B                           | KCNQ4                | OSBPL9           | LPHN2             | CAPZA1             | VPS45                                                                                | DARC     | NUF2      | RP11     |
|-----------------|----------------------------------|----------------------|------------------|-------------------|--------------------|--------------------------------------------------------------------------------------|----------|-----------|----------|
| TOMM20          | TP53I3                           | FAM179A              | ACTR2            | PCBP1             | PKP4               | CCDC141                                                                              | SH3BP5   | KIAA1143  |          |
| WDR82P1         | ALDH1L1-AS1                      | AFAP1                | RELL1            | IL8               | SEPT11             | TBCK                                                                                 | RAB33B   | PTGER4    |          |
| SCAMP1          | POU5F2                           | H2AFJ                | PCDHB4           | ZNF165            | C6orf203           | GNAI1                                                                                | ORAI2    | THAP5     |          |
| AKR1B10         | SOX7                             | UBXN8                | GPR124           | LSM1              | SNAI2              | KIAA1432                                                                             | GALT     | FAM214B   |          |
| RAPGEF1         | ZNF438                           | HNRNPF               | CHCHD1           | EMILIN3           | ZNF518A            | HOGA1                                                                                | FAM196A  | SF3B2     | LRP5     |
| MSANTD4         | MCAM                             | ESAM                 | PKNOX2           | APPL2             | WBP11              | ABCD2                                                                                | RACGAP1  | PCBP2     | SLC7A1   |
| MTRF1           | EFNB2                            | MYH6                 | BATF             | IRF2BPL           | RPS2P4             | CTD                                                                                  | SNUPN    | BLM       | CDR2     |
| TSNAXIP1        |                                  | TERF2                | CMIP             | GALNS             | ARHGAP23           |                                                                                      | C17orf98 |           | LRRC37A3 |
| SYNGR2          | ARHGDI1A                         | FN3K                 | ATP8B1           | POLR2E            | LRG1               | SEMA6B                                                                               | KHSRP    | HNRNPUL1  |          |
| SIGLEC10        |                                  | CRLS1                | TSHZ2            | ERG               | ICOSLG             | CLTCL1                                                                               | CCDC116  | RP1       | CSF2RB   |
| SMCR7L          | CXorf36                          | RPSAP14              | PCDH19           | IDS               |                    |                                                                                      |          |           |          |
| GOBPID          | Pvalue                           | OddsRatio            | ExpCount         | Count             | Size               | Term                                                                                 |          |           |          |
| GO:0000375      | 10                               | 1.95112202809718e-07 | 10.3218993518316 | 10.3218993518316  | 1.14255068853367   | RNA splicing, via transesterification reactions                                      |          |           |          |
| GO:0008380      | 11                               | 1.36842157637575e-06 | 7.28978129713424 | 7.28978129713424  | 1.76576015500657   | RNA splicing                                                                         |          |           |          |
| GO:0006397      | 11                               | 1.037040984638e-05   | 5.83020012128563 | 5.83020012128563  | 2.18123313265518   | mRNA processing                                                                      |          |           |          |
| GO:0000377      | 8                                | 1.52014142646623e-05 | 8.14946823799943 | 8.14946823799943  | 1.11521694000415   | RNA splicing, via transesterification reactions with bulged adenosine as nucleophile |          |           |          |
| GO:0000398      | 8                                | 1.52014142646623e-05 | 8.14946823799943 | 8.14946823799943  | 1.11521694000415   | nuclear mRNA splicing, via spliceosome                                               |          |           |          |
| GO:2000104      | 2                                | 0.00187962251482867  | 37.3038961038961 | 37.3038961038961  | 0.0656009964708325 | negative regulation of DNA-dependent DNA replication                                 |          |           |          |
| GO:0071775      | 2                                | 0.00221351136977795  | 33.9102715466352 | 33.9102715466352  | 0.0710677461767352 | regulation of cell cycle cytokinesis                                                 |          |           |          |
| GO:0071777      | 2                                | 0.00221351136977795  | 33.9102715466352 | 33.9102715466352  | 0.0710677461767352 | positive regulation of cell cycle cytokinesis                                        |          |           |          |
| GO:0032467      | 2                                | 0.00295868824346752  | 28.6893106893107 | 28.6893106893107  | 0.0820012455885406 | positive regulation of cytokinesis                                                   |          |           |          |
| GO:0090329      | 22                               | 0.00634996031081422  | 18.638961038961  | 18.638961038961   | 0.12026849352986   | regulation of DNA-dependent DNA replication                                          |          |           | 2        |
| GO:0060444      | 2                                | 0.00693020683008556  | 17.7501546072975 | 17.7501546072975  | 0.125735243235762  | branching involved in mammary gland duct morphogenesis                               |          |           |          |
| GO:0045600      | 2                                | 0.00753359074695003  | 16.9421487603306 | 16.9421487603306  | 0.131201992941665  | positive regulation of fat cell differentiation                                      |          |           |          |
| GO:0006200      | 3                                | 0.00800599764520436  | 7.83991228070175 | 7.83991228070175  | 0.410006227942703  | ATP catabolic process                                                                |          |           |          |
| GO:0032465      | 2                                | 0.00815984834055658  | 16.2044042913608 | 16.2044042913608  | 0.136668742647568  | regulation of cytokinesis                                                            |          |           |          |
| GO:0030278      | 145                              | 0.00816878626080113  | 5.3828841607565  | 5.3828841607565   | 0.792678707355892  | regulation of ossification                                                           |          |           | 4        |
| Tissue:         | whole_Blood=>Nerve_Tibial        |                      |                  |                   |                    | Type: asymmetric                                                                     |          |           |          |
| SourceGene:     | RP11-253A20.1(ENSG00000238140.1) |                      |                  |                   |                    |                                                                                      |          |           |          |
| TargetGeneSet:  | OTUD3                            | GNG12                | LHX4             | SRSF7             | ASS1P2             | CYP8B1                                                                               | ZNF595   | LYAR      |          |
| ZDHC11          | TMC06                            | ZFP2                 | ID4              | SP4               | FAM133B            | ZNF767                                                                               | ASPH     | CTA       | NOL8     |
| TEX10           | SUSD1                            | ZFP37                | C9orf114         |                   | WDR85              | ZNF485                                                                               | RP11     | C10orf107 |          |
| MRVI1-AS1       |                                  | CCDC34               | TTC17            | FNBP4             | EED                | SNORA18                                                                              | HINFP    | ZNF202    | ENO2     |
| DDX23           | PA2G4                            | RSRC2                | ZNF140           | ST6GALNAC4P1      | FTH1P7             | RNASEH2B-AS1                                                                         |          |           | NGDN     |
| ZBTB1           | ZNF434                           | LYRM1                | NPIPL3           | SNORA67           | TADA2A             | GJD3                                                                                 | ZNF271   | IZUMO4    | CTD      |
| ELOF1           | ZNF724P                          | ZNF540               | ZNF227           | ZNF347            | ZNF17              | NOP56                                                                                | ESF1     | RP4       | ZNF337   |
| KRT18P4         | EIF4ENIF1                        |                      | NOL12            | DMD-AS2           | LAS1L              | UPF3B                                                                                | FRMD7    |           |          |
| GOBPID          | Pvalue                           | OddsRatio            | ExpCount         | Count             | Size               | Term                                                                                 |          |           |          |
| GO:0022613      | 6                                | 5.73777302553661e-05 | 10.2292718096611 | 10.2292718096611  | 0.685073697321985  | ribonucleoprotein complex biogenesis                                                 |          |           |          |
| GO:0071843      | 6                                | 8.0168192862928e-05  | 9.60515021459227 | 9.60515021459227  | 0.727700505155353  | cellular component biogenesis at cellular level                                      |          |           |          |
| GO:0006364      | 4                                | 0.000275421458510974 | 14.307           | 0.316656286762162 | 4                  | 104                                                                                  |          |           |          |
| rRNA processing |                                  |                      |                  |                   |                    |                                                                                      |          |           |          |
| GO:0016072      | 4                                | 0.000341253307514782 | 13.4915094339623 | 13.4915094339623  | 0.334924918690748  | rRNA metabolic process                                                               |          |           |          |

Stable4\_20PerPair

GO:0042254 0.00106953144821759 9.83586206896552 0.453671026226559  
 4 149 ribosome biogenesis  
 GO:0034470 0.00313555516419719 7.25051020408163 0.608954397619542  
 4 200 ncRNA processing  
 GO:0000377 0.00336630188842736 7.1035 0.621133485571933 4 204  
 RNA splicing, via transesterification reactions with bulged adenosine as nucleophile  
 GO:0000398 0.00336630188842736 7.1035 0.621133485571933 4 204  
 nuclear mRNA splicing, via spliceosome  
 GO:0000375 0.00367072633441748 6.92780487804878 0.636357345512421  
 4 209 RNA splicing, via transesterification reactions  
 GO:0006369 0.00790323900060192 16.2868480725624 0.133969967476299  
 2 44 termination of RNA polymerase II transcription  
 GO:0016056 0.00910716059984296 167.5 0.00913431596429313 1 3  
 rhodopsin mediated signaling pathway  
 GO:0021523 0.00910716059984296 167.5 0.00913431596429313 1 3  
 somatic motor neuron differentiation  
 GO:0031585 0.00910716059984296 167.5 0.00913431596429313 1 3  
 regulation of inositol 1,4,5-trisphosphate-sensitive calcium-release channel activity

Tissue: Whole\_Blood=>Nerve\_Tibial Type: cluster

SourceGene: RP11-253A20.1(ENSG00000238140.1)  
 TargetGeneSet: OTUD3 GNG12 LHX4 SRSF7 ASS1P2 CYP8B1 ZNF595 LYAR  
 ZDHHC11 TMC06 ZFP2 ID4 SP4 FAM133B ZNF767 ASPH CTA NOL8  
 TEX10 SUSD1 ZFP37 C9orf114 WDR85 ZNF485 RP11 C10orf107  
 MRV11-AS1 CCDC34 TTC17 FNBP4 EED SNORA18 HINFP ZNF202 ENO2  
 DDX23 PA2G4 RSRC2 ZNF140 ST6GALNAC4P1 FTH1P7 RNASEH2B-AS1 NGDN  
 ZBTB1 ZNF434 LYRM1 NPIPL3 SNORA67 TADA2A GJD3 ZNF271 IZUMO4 CTD  
 ELOF1 ZNF724P ZNF540 ZNF227 ZNF347 ZNF17 NOP56 ESF1 RP4 ZNF337  
 KRT18P4 EIF4ENIF1 NOL12 DMD-AS2 LAS1L UPF3B FRMD7

GOBPID Pvalue OddsRatio ExpCount Count Size Term  
 GO:0022613 5.73777302553661e-05 10.2292718096611 0.685073697321985  
 6 225 ribonucleoprotein complex biogenesis  
 GO:0071843 8.0168192862928e-05 9.60515021459227 0.727700505155353  
 6 239 cellular component biogenesis at cellular level  
 GO:0006364 0.000275421458510974 14.307 0.316656286762162 4 104  
 rRNA processing  
 GO:0016072 0.000341253307514782 13.4915094339623 0.334924918690748  
 4 110 rRNA metabolic process  
 GO:0042254 0.00106953144821759 9.83586206896552 0.453671026226559  
 4 149 ribosome biogenesis  
 GO:0034470 0.00313555516419719 7.25051020408163 0.608954397619542  
 4 200 ncRNA processing  
 GO:0000377 0.00336630188842736 7.1035 0.621133485571933 4 204  
 RNA splicing, via transesterification reactions with bulged adenosine as nucleophile  
 GO:0000398 0.00336630188842736 7.1035 0.621133485571933 4 204  
 nuclear mRNA splicing, via spliceosome  
 GO:0000375 0.00367072633441748 6.92780487804878 0.636357345512421  
 4 209 RNA splicing, via transesterification reactions  
 GO:0006369 0.00790323900060192 16.2868480725624 0.133969967476299  
 2 44 termination of RNA polymerase II transcription  
 GO:0016056 0.00910716059984296 167.5 0.00913431596429313 1 3  
 rhodopsin mediated signaling pathway  
 GO:0021523 0.00910716059984296 167.5 0.00913431596429313 1 3  
 somatic motor neuron differentiation  
 GO:0031585 0.00910716059984296 167.5 0.00913431596429313 1 3  
 regulation of inositol 1,4,5-trisphosphate-sensitive calcium-release channel activity

Tissue: Whole\_Blood=>Nerve\_Tibial Type: asymmetric

SourceGene: RP11-475O23.3(ENSG00000244383.1)  
 TargetGeneSet: MIR214 TFB2M PTRHD1 THSD7B NELL2 ZDHHC23 RP11 CLDN18  
 CADHAP1 NREP GPX3 RP1 HCG21 VEGFA CLDN12 ZNF252 FREM1 AVPI1  
 CALHM3 NARS2 SNORA18 AMN1 CPSF6 PPP2R5C SMAD6 SRSF1 RNF165 NFKBID  
 TMEM145 PVR ZNF444 ZIK1 FTLP3 MAPRE1 TMSB15B KIAA1210 TMEM185AL

Stable4\_20PerPair

| GOBPID     | Pvalue | OddsRatio            | ExpCount         | Count               | Size | Term                                                                                                                  |
|------------|--------|----------------------|------------------|---------------------|------|-----------------------------------------------------------------------------------------------------------------------|
| GO:0031333 | 3      | 9.42063618146793e-05 | 40.5253759398496 |                     |      | 0.0898207736488824                                                                                                    |
|            | 59     |                      |                  |                     |      | negative regulation of protein complex assembly                                                                       |
| GO:0034329 | 4      | 0.000104514900157854 | 19.5706447187929 |                     |      | 0.25271607501211                                                                                                      |
|            | 166    |                      |                  |                     |      | cell junction assembly                                                                                                |
| GO:0043254 | 4      | 0.000114598647833307 | 19.0937081659973 |                     |      | 0.258805618988305                                                                                                     |
|            | 170    |                      |                  |                     |      | regulation of protein complex assembly                                                                                |
| GO:0034330 | 4      | 0.000165493359798409 | 17.2993321190043 |                     |      | 0.284686180887136                                                                                                     |
|            | 187    |                      |                  |                     |      | cell junction organization                                                                                            |
| GO:0016338 |        | 0.000501734720478402 | 72.045           | 0.0334924918690748  | 2    | 22                                                                                                                    |
|            |        |                      |                  |                     |      | calcium-independent cell-cell adhesion                                                                                |
| GO:0042462 | 2      | 0.000549012540182405 | 68.6095238095238 |                     |      | 0.0350148778631237                                                                                                    |
|            | 23     |                      |                  |                     |      | eye photoreceptor cell development                                                                                    |
| GO:0045216 | 3      | 0.000729779281246389 | 19.6530892448513 |                     |      | 0.179641547297765                                                                                                     |
|            | 118    |                      |                  |                     |      | cell-cell junction organization                                                                                       |
| GO:0042461 |        | 0.000758870007195971 | 57.616           | 0.0411044218393191  | 2    | 27                                                                                                                    |
|            |        |                      |                  |                     |      | photoreceptor cell development                                                                                        |
| GO:0001754 | 2      | 0.000876164647072688 | 53.3407407407407 |                     |      | 0.0441491938274168                                                                                                    |
|            | 29     |                      |                  |                     |      | eye photoreceptor cell differentiation                                                                                |
| GO:0044087 | 4      | 0.00102840008996212  | 10.5016722408027 |                     |      | 0.461282956196803                                                                                                     |
|            | 303    |                      |                  |                     |      | regulation of cellular component biogenesis                                                                           |
| GO:0046530 | 2      | 0.00135082481415997  | 42.3382352941176 |                     |      | 0.0548058957857588                                                                                                    |
|            | 36     |                      |                  |                     |      | photoreceptor cell differentiation                                                                                    |
| GO:0070830 | 2      | 0.00135082481415997  | 42.3382352941176 |                     |      | 0.0548058957857588                                                                                                    |
|            | 36     |                      |                  |                     |      | tight junction assembly                                                                                               |
| GO:0032272 | 2      | 0.00158444278089746  | 38.8972972972973 |                     |      | 0.0593730537679053                                                                                                    |
|            | 39     |                      |                  |                     |      | negative regulation of protein polymerization                                                                         |
| GO:0043297 | 2      | 0.00192373965511358  | 35.0926829268293 |                     |      | 0.0654625977441008                                                                                                    |
|            | 43     |                      |                  |                     |      | apical junction assembly                                                                                              |
| GO:0043154 | 2      | 0.00324177451759776  | 26.6203703703704 |                     |      | 0.0852536156667359                                                                                                    |
|            | 56     |                      |                  |                     |      | negative regulation of cysteine-type endopeptidase activity involved in apoptotic process                             |
| GO:0031589 | 3      | 0.00340655627254603  | 11.2906638455435 |                     |      | 0.307521970797869                                                                                                     |
|            | 202    |                      |                  |                     |      | cell-substrate adhesion                                                                                               |
| GO:2000117 | 2      | 0.00359181154536618  | 25.2140350877193 |                     |      | 0.0898207736488824                                                                                                    |
|            | 59     |                      |                  |                     |      | negative regulation of cysteine-type endopeptidase activity                                                           |
| GO:0007043 | 2      | 0.00434240655972103  | 22.8031746031746 |                     |      | 0.0989550896131756                                                                                                    |
|            | 65     |                      |                  |                     |      | cell-cell junction assembly                                                                                           |
| GO:0000395 |        | 0.00456052365236981  | 343.5            | 0.00456715798214656 | 1    | 3                                                                                                                     |
|            |        |                      |                  |                     |      | nuclear mRNA 5'-splice site recognition                                                                               |
| GO:0006391 |        | 0.00456052365236981  | 343.5            | 0.00456715798214656 | 1    | 3                                                                                                                     |
|            |        |                      |                  |                     |      | transcription initiation from mitochondrial promoter                                                                  |
| GO:0006421 |        | 0.00456052365236981  | 343.5            | 0.00456715798214656 | 1    | 3                                                                                                                     |
|            |        |                      |                  |                     |      | asparaginyl-tRNA aminoacylation                                                                                       |
| GO:0006982 |        | 0.00456052365236981  | 343.5            | 0.00456715798214656 | 1    | 3                                                                                                                     |
|            |        |                      |                  |                     |      | response to lipid hydroperoxide                                                                                       |
| GO:0007352 |        | 0.00456052365236981  | 343.5            | 0.00456715798214656 | 1    | 3                                                                                                                     |
|            |        |                      |                  |                     |      | zygotic specification of dorsal/ventral axis                                                                          |
| GO:0010990 |        | 0.00456052365236981  | 343.5            | 0.00456715798214656 | 1    | 3                                                                                                                     |
|            |        |                      |                  |                     |      | regulation of SMAD protein complex assembly                                                                           |
| GO:0010991 |        | 0.00456052365236981  | 343.5            | 0.00456715798214656 | 1    | 3                                                                                                                     |
|            |        |                      |                  |                     |      | negative regulation of SMAD protein complex assembly                                                                  |
| GO:0035845 |        | 0.00456052365236981  | 343.5            | 0.00456715798214656 | 1    | 3                                                                                                                     |
|            |        |                      |                  |                     |      | photoreceptor cell outer segment organization                                                                         |
| GO:0038086 |        | 0.00456052365236981  | 343.5            | 0.00456715798214656 | 1    | 3                                                                                                                     |
|            |        |                      |                  |                     |      | VEGF-activated platelet-derived growth factor receptor signaling pathway                                              |
| GO:0038091 |        | 0.00456052365236981  | 343.5            | 0.00456715798214656 | 1    | 3                                                                                                                     |
|            |        |                      |                  |                     |      | positive regulation of cell proliferation by VEGF-activated platelet derived growth factor receptor signaling pathway |
| GO:0042271 |        | 0.00456052365236981  | 343.5            | 0.00456715798214656 | 1    | 3                                                                                                                     |
|            |        |                      |                  |                     |      | susceptibility to natural killer cell mediated cytotoxicity                                                           |
| GO:2001028 |        | 0.00456052365236981  | 343.5            | 0.00456715798214656 | 1    | 3                                                                                                                     |
|            |        |                      |                  |                     |      | positive regulation of endothelial cell chemotaxis                                                                    |

Stable4\_20PerPair

|            |                                                                                            |                    |                       |
|------------|--------------------------------------------------------------------------------------------|--------------------|-----------------------|
| GO:0017015 | 0.00474267137576785                                                                        | 21.762121212121212 | 0.103522247595322     |
| 2 68       | regulation of transforming growth factor beta receptor signaling                           |                    |                       |
| pathway    |                                                                                            |                    |                       |
| GO:0051494 | 0.00559240931166944                                                                        | 19.940277777777778 | 0.112656563559615     |
| 2 74       | negative regulation of cytoskeleton organization                                           |                    |                       |
| GO:0031124 | 0.00604159453228434                                                                        | 19.138666666666667 | 0.117223721541762     |
| 2 77       | mRNA 3'-end processing                                                                     |                    |                       |
| GO:0035372 | 0.00607628143750583                                                                        | 228.984126984127   | 0.00608954397619542   |
| 1 4        | protein localization to microtubule                                                        |                    |                       |
| GO:0072698 | 0.00607628143750583                                                                        | 228.984126984127   | 0.00608954397619542   |
| 1 4        | protein localization to microtubule cytoskeleton                                           |                    |                       |
| GO:0048593 | 0.00634996031081421                                                                        | 18.638961038961    | 0.12026849352986 2    |
| 79         | camera-type eye morphogenesis                                                              |                    |                       |
| GO:0051262 | 0.0066654041753842                                                                         | 18.1645569620253   | 0.123313265517957     |
| 2 81       | protein tetramerization                                                                    |                    |                       |
| GO:0002238 | 0.00758983593382867                                                                        | 171.72619047619    | 0.00761192997024427 1 |
| 5          | response to molecule of fungal origin                                                      |                    |                       |
| GO:0031077 | 0.00758983593382867                                                                        | 171.72619047619    | 0.00761192997024427 1 |
| 5          | post-embryonic camera-type eye development                                                 |                    |                       |
| GO:0031115 | 0.00758983593382867                                                                        | 171.72619047619    | 0.00761192997024427 1 |
| 5          | negative regulation of microtubule polymerization                                          |                    |                       |
| GO:0033085 | 0.00758983593382867                                                                        | 171.72619047619    | 0.00761192997024427 1 |
| 5          | negative regulation of T cell differentiation in thymus                                    |                    |                       |
| GO:0038083 | 0.00758983593382867                                                                        | 171.72619047619    | 0.00761192997024427 1 |
| 5          | peptidyl-tyrosine autophosphorylation                                                      |                    |                       |
| GO:0043117 | 0.00758983593382867                                                                        | 171.72619047619    | 0.00761192997024427 1 |
| 5          | positive regulation of vascular permeability                                               |                    |                       |
| GO:0045750 | 0.00758983593382867                                                                        | 171.72619047619    | 0.00761192997024427 1 |
| 5          | positive regulation of S phase of mitotic cell cycle                                       |                    |                       |
| GO:0060394 | 0.00758983593382867                                                                        | 171.72619047619    | 0.00761192997024427 1 |
| 5          | negative regulation of pathway-restricted SMAD protein phosphorylation                     |                    |                       |
| GO:0060753 | 0.00758983593382867                                                                        | 171.72619047619    | 0.00761192997024427 1 |
| 5          | regulation of mast cell chemotaxis                                                         |                    |                       |
| GO:0060754 | 0.00758983593382867                                                                        | 171.72619047619    | 0.00761192997024427 1 |
| 5          | positive regulation of mast cell chemotaxis                                                |                    |                       |
| GO:2001026 | 0.00758983593382867                                                                        | 171.72619047619    | 0.00761192997024427 1 |
| 5          | regulation of endothelial cell chemotaxis                                                  |                    |                       |
| GO:0031123 | 0.00834733482324249                                                                        | 16.1123595505618   | 0.138537125458446     |
| 2 91       | RNA 3'-end processing                                                                      |                    |                       |
| GO:0032271 | 0.00852500309646574                                                                        | 15.932222222222222 | 0.140059511452495     |
| 2 92       | regulation of protein polymerization                                                       |                    |                       |
| GO:0043623 | 0.00902660910221944                                                                        | 7.86415863602669   | 0.436924780292021     |
| 3 287      | cellular protein complex assembly                                                          |                    |                       |
| GO:0001657 | 0.00906820078863467                                                                        | 15.4150537634409   | 0.144626669434641     |
| 2 95       | ureteric bud development                                                                   |                    |                       |
| GO:0022618 | 0.00906820078863467                                                                        | 15.4150537634409   | 0.144626669434641     |
| 2 95       | ribonucleoprotein complex assembly                                                         |                    |                       |
| GO:0000244 | 0.00910119019171707                                                                        | 137.371428571429   | 0.00913431596429313   |
| 1 6        | assembly of spliceosomal tri-snRNP                                                         |                    |                       |
| GO:0002420 | 0.00910119019171707                                                                        | 137.371428571429   | 0.00913431596429313   |
| 1 6        | natural killer cell mediated cytotoxicity directed against tumor cell target               |                    |                       |
| GO:0002423 | 0.00910119019171707                                                                        | 137.371428571429   | 0.00913431596429313   |
| 1 6        | natural killer cell mediated immune response to tumor cell                                 |                    |                       |
| GO:0002855 | 0.00910119019171707                                                                        | 137.371428571429   | 0.00913431596429313   |
| 1 6        | regulation of natural killer cell mediated immune response to tumor cell                   |                    |                       |
| GO:0002857 | 0.00910119019171707                                                                        | 137.371428571429   | 0.00913431596429313   |
| 1 6        | positive regulation of natural killer cell mediated immune response to tumor cell          |                    |                       |
| GO:0002858 | 0.00910119019171707                                                                        | 137.371428571429   | 0.00913431596429313   |
| 1 6        | regulation of natural killer cell mediated cytotoxicity directed against tumor cell target |                    |                       |

Stable4\_20PerPair

|                                   |                                                                    |                  |                     |
|-----------------------------------|--------------------------------------------------------------------|------------------|---------------------|
| GO:0002860                        | 0.00910119019171707                                                | 137.371428571429 | 0.00913431596429313 |
| 1 6                               | positive regulation of natural killer cell mediated cytotoxicity   |                  |                     |
| directed against                  | tumor cell target                                                  |                  |                     |
| GO:0044380                        | 0.00910119019171707                                                | 137.371428571429 | 0.00913431596429313 |
| 1 6                               | protein localization to cytoskeleton                               |                  |                     |
| GO:0046548                        | 0.00910119019171707                                                | 137.371428571429 | 0.00913431596429313 |
| 1 6                               | retinal rod cell development                                       |                  |                     |
| GO:0060215                        | 0.00910119019171707                                                | 137.371428571429 | 0.00913431596429313 |
| 1 6                               | primitive hemopoiesis                                              |                  |                     |
| GO:0070245                        | 0.00910119019171707                                                | 137.371428571429 | 0.00913431596429313 |
| 1 6                               | positive regulation of thymocyte apoptotic process                 |                  |                     |
| GO:0090050                        | 0.00910119019171707                                                | 137.371428571429 | 0.00913431596429313 |
| 1 6                               | positive regulation of cell migration involved in sprouting        |                  |                     |
| angiogenesis                      |                                                                    |                  |                     |
| Tissue: whole_Blood=>Nerve_Tibial | Type: asymmetric                                                   |                  |                     |
| SourceGene:                       | SNORA42(ENSG00000207217.1)                                         |                  |                     |
| TargetGeneSet:                    | HSPB7 MACF1 NEXN Clorf61 F5 B3GALT2 RP11 RYR2                      |                  |                     |
| OR2L2 YPEL5                       | KCNG3 REEP1 POU3F3 SOWAHC ACVR1C GAD1 ERBB4 PPARG                  |                  |                     |
| C3orf23 MYLK                      | KALRN ROPN1B LPP GPR125 SGCB SPARCL1 CISD2 UGT8                    |                  |                     |
| USP38 RBM46                       | SORBS2 CTD RCAN2 STXBP2 KLHL32 PLN HEBP2 SFT2D1 ISPD               |                  |                     |
| KIAA0895                          | DLX6 RP4 SERPINE1 ZMAT4 LYNX1 TPM2 PTPN3                           |                  |                     |
| GRIN1 ITGA8                       | PLXDC2 GAD2 CHAF1B PRKG1 CAMK2G VCL EMX2OS EMX2                    |                  |                     |
| STIM1 TMEM9B                      | MRVI1 TAGLN RERGL KRT18 ITGA5 S100G CPNE6 C14orf180                |                  |                     |
| SHC4 UNC13C                       | TPM1 MYH11 TMEM159 CRYM RRAD AOC3 ST8SIA3 OLFM2 CNN1               |                  |                     |
| PDE4C SLC8A2                      | ANGPT4 SNAP25 JAG1 DSTN JPH2 SLC12A5 PTCHD1 COL4A6 FHL1            |                  |                     |
| GOBPID Pvalue                     | OddsRatio ExpCount Count Size Term                                 |                  |                     |
| GO:0030334                        | 1.24366162339142e-05                                               | 6.37164925034075 | 1.81855926925472    |
| 10 365                            | regulation of cell migration                                       |                  |                     |
| GO:0006816                        | 1.65191485751477e-05                                               | 8.08219178082192 | 1.13099439485157    |
| 8 227                             | calcium ion transport                                              |                  |                     |
| GO:2000145                        | 1.97204030167133e-05                                               | 6.02322580645161 | 1.91820635250156    |
| 10 385                            | regulation of cell motility                                        |                  |                     |
| GO:1901021                        | 3.27250896480795e-05                                               | 62.4739130434783 | 0.0647706041104422  |
| 3 13                              | positive regulation of calcium ion transmembrane transporter       |                  |                     |
| activity                          |                                                                    |                  |                     |
| GO:2001259                        | 3.27250896480795e-05                                               | 62.4739130434783 | 0.0647706041104422  |
| 3 13                              | positive regulation of cation channel activity                     |                  |                     |
| GO:0051270                        | 3.30671364212874e-05                                               | 5.65122483628426 | 2.03778285239776    |
| 10 409                            | regulation of cellular component movement                          |                  |                     |
| GO:0061061                        | 3.30671364212874e-05                                               | 5.65122483628426 | 2.03778285239776    |
| 10 409                            | muscle structure development                                       |                  |                     |
| GO:0040012                        | 3.51836711008842e-05                                               | 5.60784785748676 | 2.05272991488478    |
| 10 412                            | regulation of locomotion                                           |                  |                     |
| GO:0070838                        | 4.36360576692067e-05                                               | 7.00744047619048 | 1.29541208220884    |
| 8 260                             | divalent metal ion transport                                       |                  |                     |
| GO:0072511                        | 4.86120467755844e-05                                               | 6.89599609375    | 1.31534149885821    |
| 264                               | divalent inorganic cation transport                                |                  | 8                   |
| GO:0003012                        | 5.12724691109473e-05                                               | 6.84156976744186 | 1.32530620718289    |
| 8 266                             | muscle system process                                              |                  |                     |
| GO:0051924                        | 8.02470593050958e-05                                               | 9.38142292490119 | 0.717458999377206   |
| 6 144                             | regulation of calcium ion transport                                |                  |                     |
| GO:0050890                        | 0.000116255886589071                                               | 8.74140049140049 | 0.767282541000623   |
| 6 154                             | cognition                                                          |                  |                     |
| GO:0060316                        | 0.000145937525678501                                               | 205.385714285714 | 0.0199294166493668  |
| 2 4                               | positive regulation of ryanodine-sensitive calcium-release channel |                  |                     |
| activity                          |                                                                    |                  |                     |
| GO:0006936                        | 0.000183062333882884                                               | 6.56690981432361 | 1.19078264479967    |
| 7 239                             | muscle contraction                                                 |                  |                     |
| GO:1901019                        | 0.000195520351876022                                               | 31.2152173913043 | 0.114594145733859   |
| 3 23                              | regulation of calcium ion transmembrane transporter activity       |                  |                     |
| GO:0010959                        | 0.000248159509690897                                               | 7.55342902711324 | 0.881876686734482   |
| 6 177                             | regulation of metal ion transport                                  |                  |                     |
| GO:0048738                        | 0.000267587318979812                                               | 9.68046132971506 | 0.572970728669296   |

Stable4\_20PerPair

|            |     |                                                                    |                  |                    |  |   |                    |    |
|------------|-----|--------------------------------------------------------------------|------------------|--------------------|--|---|--------------------|----|
| 5          | 115 | cardiac muscle tissue development                                  |                  |                    |  |   |                    |    |
| GO:0030336 |     | 0.000301549867017015                                               | 9.42147668735966 |                    |  |   | 0.587917791156321  |    |
| 5          | 118 | negative regulation of cell migration                              |                  |                    |  |   |                    |    |
| GO:0006887 |     | 0.000313294925230738                                               | 5.98879466989703 |                    |  |   | 1.30039443637119   |    |
| 7          | 261 | exocytosis                                                         |                  |                    |  |   |                    |    |
| GO:0032414 |     | 0.00031833981772063                                                | 26.0054347826087 |                    |  |   | 0.134523562383226  |    |
| 3          | 27  | positive regulation of ion transmembrane transporter activity      |                  |                    |  |   |                    |    |
| GO:2000146 |     | 0.000325944259850793                                               | 9.25632706035042 |                    |  |   | 0.597882499481005  |    |
| 5          | 120 | negative regulation of cell motility                               |                  |                    |  |   |                    |    |
| GO:0060537 |     | 0.000410825282283638                                               | 5.71376518218623 |                    |  |   | 1.36018268631929   |    |
| 7          | 273 | muscle tissue development                                          |                  |                    |  |   |                    |    |
| GO:0051271 |     | 0.000423261922807407                                               | 8.72094445803768 |                    |  |   | 0.632758978617397  |    |
| 5          | 127 | negative regulation of cellular component movement                 |                  |                    |  |   |                    |    |
| GO:0006538 |     | 0.000505853434055779                                               | 82.1371428571429 |                    |  |   | 0.0348764791363919 |    |
| 2          | 7   | glutamate catabolic process                                        |                  |                    |  |   |                    |    |
| GO:0040013 |     | 0.000541074983732698                                               | 8.24366539396043 |                    |  |   | 0.667635457753789  |    |
| 5          | 134 | negative regulation of locomotion                                  |                  |                    |  |   |                    |    |
| GO:0032411 |     | 0.000635189876702784                                               | 20.1234221598878 |                    |  |   | 0.169400041519618  |    |
| 3          | 34  | positive regulation of transporter activity                        |                  |                    |  |   |                    |    |
| GO:2001257 |     | 0.000635189876702784                                               | 20.1234221598878 |                    |  |   | 0.169400041519618  |    |
| 3          | 34  | regulation of cation channel activity                              |                  |                    |  |   |                    |    |
| GO:0007611 |     | 0.000682014930807697                                               | 7.81551799824407 |                    |  |   | 0.702511936890181  |    |
| 5          | 141 | learning or memory                                                 |                  |                    |  |   |                    |    |
| GO:0043269 |     | 0.000750251098573927                                               | 6.07504288164666 |                    |  |   | 1.08615320739049   |    |
| 6          | 218 | regulation of ion transport                                        |                  |                    |  |   |                    |    |
| GO:0007517 |     | 0.000763333622590759                                               | 5.1237525987526  | 1.50965331118954   |  |   |                    | 7  |
| 303        |     | muscle organ development                                           |                  |                    |  |   |                    |    |
| GO:0007596 |     | 0.000787887600007132                                               | 4.0578439964943  | 2.48121237284617   |  |   |                    | 9  |
| 498        |     | blood coagulation                                                  |                  |                    |  |   |                    |    |
| GO:0005513 |     | 0.000861595699690728                                               | 58.6612244897959 |                    |  |   | 0.0448411874610754 |    |
| 2          | 9   | detection of calcium ion                                           |                  |                    |  |   |                    |    |
| GO:0072070 |     | 0.000861595699690728                                               | 58.6612244897959 |                    |  |   | 0.0448411874610754 |    |
| 2          | 9   | loop of Henle development                                          |                  |                    |  |   |                    |    |
| GO:0006105 |     | 0.00107352482666513                                                | 51.325           | 0.0498235416234171 |  | 2 |                    | 10 |
|            |     | succinate metabolic process                                        |                  |                    |  |   |                    |    |
| GO:0072017 |     | 0.00107352482666513                                                | 51.325           | 0.0498235416234171 |  | 2 |                    | 10 |
|            |     | distal tubule development                                          |                  |                    |  |   |                    |    |
| GO:0008016 |     | 0.00133201158944733                                                | 9.1349104859335  | 0.478305999584804  |  |   |                    | 4  |
| 96         |     | regulation of heart contraction                                    |                  |                    |  |   |                    |    |
| GO:0031032 |     | 0.0014483355998319                                                 | 14.8416149068323 |                    |  |   | 0.224205937305377  |    |
| 3          | 45  | actomyosin structure organization                                  |                  |                    |  |   |                    |    |
| GO:0007507 |     | 0.00154058927103041                                                | 4.5147187141217  | 1.70396512352086   |  |   |                    | 7  |
| 342        |     | heart development                                                  |                  |                    |  |   |                    |    |
| GO:0031000 |     | 0.00156437954967697                                                | 41.0542857142857 |                    |  |   | 0.0597882499481005 |    |
| 2          | 12  | response to caffeine                                               |                  |                    |  |   |                    |    |
| GO:0060314 |     | 0.00184286217877313                                                | 37.3194805194805 |                    |  |   | 0.0647706041104422 |    |
| 2          | 13  | regulation of ryanodine-sensitive calcium-release channel activity |                  |                    |  |   |                    |    |
| GO:0090257 |     | 0.00191891216477087                                                | 8.23356401384083 |                    |  |   | 0.528129541208221  |    |
| 4          | 106 | regulation of muscle system process                                |                  |                    |  |   |                    |    |
| GO:0042136 |     | 0.00214308900724139                                                | 34.2071428571429 |                    |  |   | 0.0697529582727839 |    |
| 2          | 14  | neurotransmitter biosynthetic process                              |                  |                    |  |   |                    |    |
| GO:0003015 |     | 0.00266461688964211                                                | 7.49317226890756 |                    |  |   | 0.577953082831638  |    |
| 4          | 116 | heart process                                                      |                  |                    |  |   |                    |    |
| GO:0032409 |     | 0.00266461688964211                                                | 7.49317226890756 |                    |  |   | 0.577953082831638  |    |
| 4          | 116 | regulation of transporter activity                                 |                  |                    |  |   |                    |    |
| GO:0060047 |     | 0.00266461688964211                                                | 7.49317226890756 |                    |  |   | 0.577953082831638  |    |
| 4          | 116 | heart contraction                                                  |                  |                    |  |   |                    |    |
| GO:0006688 |     | 0.00280790683681906                                                | 29.3163265306122 |                    |  |   | 0.0797176665974673 |    |
| 2          | 16  | glycosphingolipid biosynthetic process                             |                  |                    |  |   |                    |    |
| GO:0043001 |     | 0.00280790683681906                                                | 29.3163265306122 |                    |  |   | 0.0797176665974673 |    |
| 2          | 16  | Golgi to plasma membrane protein transport                         |                  |                    |  |   |                    |    |
| GO:0014074 |     | 0.00317206755337898                                                | 27.36            | 0.084700020759809  |  | 2 |                    | 17 |
|            |     | response to purine-containing compound                             |                  |                    |  |   |                    |    |

Stable4\_20PerPair

|            |                     |                                                        |                    |       |
|------------|---------------------|--------------------------------------------------------|--------------------|-------|
| GO:0009247 | 0.00355711188038176 | 25.6482142857143                                       | 0.0896823749221507 |       |
| 2          | 18                  | glycolipid biosynthetic process                        |                    |       |
| GO:0008015 | 0.00396248498461866 | 4.31037649219467                                       | 1.50965331118954   |       |
| 6          | 303                 | blood circulation                                      |                    |       |
| GO:0048745 | 0.00396282855922372 | 24.1378151260504                                       | 0.0946647290844924 |       |
| 2          | 19                  | smooth muscle tissue development                       |                    |       |
| GO:0003013 | 0.0040265969460125  | 4.29560707748627                                       | 1.51463566535188   |       |
| 6          | 304                 | circulatory system process                             |                    |       |
| GO:0007613 | 0.00415249566492265 | 10.0399719495091                                       | 0.323853020552211  |       |
| 3          | 65                  | memory                                                 |                    |       |
| GO:0006893 | 0.00438900786712372 | 22.7952380952381                                       | 0.0996470832468341 |       |
| 2          | 20                  | Golgi to plasma membrane transport                     |                    |       |
| GO:0009914 | 0.00442666229475119 | 5.01096413666266                                       | 1.07618849906581   |       |
| 5          | 216                 | hormone transport                                      |                    |       |
| GO:0044057 | 0.00464974491020803 | 3.66915572232645                                       | 2.07764168569649   |       |
| 7          | 417                 | regulation of system process                           |                    |       |
| GO:0003001 | 0.00485744321269216 | 4.1258064516129                                        | 1.57442391529998   | 6     |
| 316        |                     | generation of a signal involved in cell-cell signaling |                    |       |
| GO:0023061 | 0.00485744321269216 | 4.1258064516129                                        | 1.57442391529998   | 6     |
| 316        |                     | signal release                                         |                    |       |
| GO:0021846 | 0.00530192309985648 | 20.5128571428571                                       | 0.109611791571518  |       |
| 2          | 22                  | cell proliferation in forebrain                        |                    |       |
| GO:0043462 | 0.00530192309985648 | 20.5128571428571                                       | 0.109611791571518  |       |
| 2          | 22                  | regulation of ATPase activity                          |                    |       |
| GO:0009065 | 0.00578824717109272 | 19.534693877551                                        | 0.114594145733859  | 2     |
| 23         |                     | glutamine family amino acid catabolic process          |                    |       |
| GO:0046676 | 0.00578824717109272 | 19.534693877551                                        | 0.114594145733859  | 2     |
| 23         |                     | negative regulation of insulin secretion               |                    |       |
| GO:0007160 | 0.00590201814857251 | 5.93992490613267                                       | 0.722441353539547  |       |
| 4          | 145                 | cell-matrix adhesion                                   |                    |       |
| GO:0021537 | 0.00619186632081811 | 5.85602632661456                                       | 0.732406061864231  |       |
| 4          | 147                 | telencephalon development                              |                    |       |
| GO:0006939 | 0.00619594598024957 | 8.63949275362319                                       | 0.373676562175628  |       |
| 3          | 75                  | smooth muscle contraction                              |                    |       |
| GO:0060402 | 0.00619594598024957 | 8.63949275362319                                       | 0.373676562175628  |       |
| 3          | 75                  | calcium ion transport into cytosol                     |                    |       |
| GO:0006536 | 0.00629421014504686 | 18.6454545454545                                       | 0.119576499896201  |       |
| 2          | 24                  | glutamate metabolic process                            |                    |       |
| GO:0060401 | 0.00642779079595319 | 8.52054794520548                                       | 0.37865891633797   |       |
| 3          | 76                  | cytosolic calcium ion transport                        |                    |       |
| GO:0051050 | 0.0064317917407265  | 3.4439308398024                                        | 2.20718289391738   | 7     |
| 443        |                     | positive regulation of transport                       |                    |       |
| GO:0042493 | 0.00651425162205806 | 3.8702479338843                                        | 1.67407099854681   | 6     |
| 336        |                     | response to drug                                       |                    |       |
| GO:0042133 | 0.00681960983346149 | 17.8335403726708                                       | 0.124558854058543  |       |
| 2          | 25                  | neurotransmitter metabolic process                     |                    |       |
| GO:0090278 | 0.00681960983346149 | 17.8335403726708                                       | 0.124558854058543  |       |
| 2          | 25                  | negative regulation of peptide hormone secretion       |                    |       |
| GO:0055074 | 0.00699154709930207 | 4.47223627624589                                       | 1.20074735312435   |       |
| 5          | 241                 | calcium ion homeostasis                                |                    |       |
| GO:0061041 | 0.00715417588426707 | 8.1824942791762                                        | 0.393605978824995  | 3     |
| 79         |                     | regulation of wound healing                            |                    |       |
| GO:0002792 | 0.00736424552645795 | 17.0892857142857                                       | 0.129541208220884  |       |
| 2          | 26                  | negative regulation of peptide secretion               |                    |       |
| GO:0030073 | 0.0076135643941621  | 5.50580495356037                                       | 0.777247249325306  |       |
| 4          | 156                 | insulin secretion                                      |                    |       |
| GO:0030900 | 0.00773543425806473 | 4.3595041322314                                        | 1.2306414780984    | 5 247 |
|            |                     | forebrain development                                  |                    |       |
| GO:0006904 | 0.00792791798315694 | 16.4045714285714                                       | 0.134523562383226  |       |
| 2          | 27                  | vesicle docking involved in exocytosis                 |                    |       |
| GO:0002576 | 0.00819567359848294 | 7.77119565217391                                       | 0.413535395474362  |       |
| 3          | 83                  | platelet degranulation                                 |                    |       |
| GO:0010035 | 0.00889084358501993 | 3.6121555498326                                        | 1.78866514428067   | 6     |



STable4\_20PerPair

|                                                 |                                 |                                                                             |                    |          |        |         |         |         |           |
|-------------------------------------------------|---------------------------------|-----------------------------------------------------------------------------|--------------------|----------|--------|---------|---------|---------|-----------|
| 359                                             | response to inorganic substance |                                                                             |                    |          |        |         |         |         |           |
| GO:0072507                                      | 0.008952363897252               | 4.20051138728667                                                            | 1.27548266555948   |          |        |         |         |         |           |
| 5                                               | 256                             | divalent inorganic cation homeostasis                                       |                    |          |        |         |         |         |           |
| GO:0007269                                      | 0.00903239820985746             | 7.48873755893138                                                            | 0.428482457961387  |          |        |         |         |         |           |
| 3                                               | 86                              | neurotransmitter secretion                                                  |                    |          |        |         |         |         |           |
| GO:0048278                                      | 0.00911158351324811             | 15.1873015873016                                                            | 0.144488270707909  |          |        |         |         |         |           |
| 2                                               | 29                              | vesicle docking                                                             |                    |          |        |         |         |         |           |
| GO:0034329                                      | 0.00942866610108447             | 5.16230936819172                                                            | 0.827070790948723  |          |        |         |         |         |           |
| 4                                               | 166                             | cell junction assembly                                                      |                    |          |        |         |         |         |           |
| GO:0055024                                      | 0.00973118536622807             | 14.6438775510204                                                            | 0.149470624870251  |          |        |         |         |         |           |
| 2                                               | 30                              | regulation of cardiac muscle tissue development                             |                    |          |        |         |         |         |           |
| GO:0014706                                      | 0.00983373807336037             | 4.10070271212033                                                            | 1.30537679053353   |          |        |         |         |         |           |
| 5                                               | 262                             | striated muscle tissue development                                          |                    |          |        |         |         |         |           |
| GO:0006937                                      | 0.00991744843816333             | 7.22598584428716                                                            | 0.443429520448412  |          |        |         |         |         |           |
| 3                                               | 89                              | regulation of muscle contraction                                            |                    |          |        |         |         |         |           |
| Tissue: whole_Blood=>Nerve_Tibial Type: cluster |                                 |                                                                             |                    |          |        |         |         |         |           |
| SourceGene: SNORA42(ENSG00000207217.1)          |                                 |                                                                             |                    |          |        |         |         |         |           |
| TargetGeneSet:                                  | HSPB7                           | MACF1                                                                       | NEXN               | Clorf61  | F5     | B3GALT2 | RP11    | RYR2    |           |
| OR2L2                                           | YPEL5                           | KCNG3                                                                       | REEP1              | POU3F3   | SOWAHC | ACVR1C  | GAD1    | ERBB4   | PPARG     |
| C3orf23                                         | MYLK                            | KALRN                                                                       | ROPN1B             | LPP      | GPR125 | SCGB    | SPARCL1 | CISD2   | UGT8      |
| USP38                                           | RBM46                           | SORBS2                                                                      | CTD                | RCAN2    | STXBP2 | KLHL32  | PLN     | HEBP2   | SFT2D1    |
| KIAA0895                                        |                                 | DLX6                                                                        | RP4                | SERPINE1 |        | ZMAT4   | LYNX1   | TPM2    | PTPN3     |
| GRIN1                                           | ITGA8                           | PLXDC2                                                                      | GAD2               | CHAF1B   | PRKG1  | CAMK2G  | VCL     | EMX2OS  | EMX2      |
| STIM1                                           | TMEM9B                          | MRVI1                                                                       | TAGLN              | RERGL    | KRT18  | ITGA5   | S100G   | CPNE6   | C14orf180 |
| SHC4                                            | UNC13C                          | TPM1                                                                        | MYH11              | TMEM159  | CRYM   | RRAD    | AOC3    | ST8SIA3 | OLFM2     |
| PDE4C                                           | SLC8A2                          | ANGPT4                                                                      | SNAP25             | JAG1     | DSTN   | JPH2    | SLC12A5 | PTCHD1  | COL4A6    |
| GOBPID                                          | Pvalue                          | OddsRatio                                                                   | ExpCount           | Count    | Size   | Term    |         |         |           |
| GO:0030334                                      | 1.24366162339142e-05            | 6.37164925034075                                                            | 1.81855926925472   |          |        |         |         |         |           |
| 10                                              | 365                             | regulation of cell migration                                                |                    |          |        |         |         |         |           |
| GO:0006816                                      | 1.65191485751477e-05            | 8.08219178082192                                                            | 1.13099439485157   |          |        |         |         |         |           |
| 8                                               | 227                             | calcium ion transport                                                       |                    |          |        |         |         |         |           |
| GO:2000145                                      | 1.97204030167133e-05            | 6.02322580645161                                                            | 1.91820635250156   |          |        |         |         |         |           |
| 10                                              | 385                             | regulation of cell motility                                                 |                    |          |        |         |         |         |           |
| GO:1901021                                      | 3.27250896480795e-05            | 62.4739130434783                                                            | 0.0647706041104422 |          |        |         |         |         |           |
| 3                                               | 13                              | positive regulation of calcium ion transmembrane transporter activity       |                    |          |        |         |         |         |           |
| GO:2001259                                      | 3.27250896480795e-05            | 62.4739130434783                                                            | 0.0647706041104422 |          |        |         |         |         |           |
| 3                                               | 13                              | positive regulation of cation channel activity                              |                    |          |        |         |         |         |           |
| GO:0051270                                      | 3.30671364212874e-05            | 5.65122483628426                                                            | 2.03778285239776   |          |        |         |         |         |           |
| 10                                              | 409                             | regulation of cellular component movement                                   |                    |          |        |         |         |         |           |
| GO:0061061                                      | 3.30671364212874e-05            | 5.65122483628426                                                            | 2.03778285239776   |          |        |         |         |         |           |
| 10                                              | 409                             | muscle structure development                                                |                    |          |        |         |         |         |           |
| GO:0040012                                      | 3.51836711008842e-05            | 5.60784785748676                                                            | 2.05272991488478   |          |        |         |         |         |           |
| 10                                              | 412                             | regulation of locomotion                                                    |                    |          |        |         |         |         |           |
| GO:0070838                                      | 4.36360576692067e-05            | 7.00744047619048                                                            | 1.29541208220884   |          |        |         |         |         |           |
| 8                                               | 260                             | divalent metal ion transport                                                |                    |          |        |         |         |         |           |
| GO:0072511                                      | 4.86120467755844e-05            | 6.89599609375                                                               | 1.31534149885821   |          |        |         |         |         | 8         |
| 264                                             |                                 | divalent inorganic cation transport                                         |                    |          |        |         |         |         |           |
| GO:0003012                                      | 5.12724691109473e-05            | 6.84156976744186                                                            | 1.32530620718289   |          |        |         |         |         |           |
| 8                                               | 266                             | muscle system process                                                       |                    |          |        |         |         |         |           |
| GO:0051924                                      | 8.02470593050958e-05            | 9.38142292490119                                                            | 0.717458999377206  |          |        |         |         |         |           |
| 6                                               | 144                             | regulation of calcium ion transport                                         |                    |          |        |         |         |         |           |
| GO:0050890                                      | 0.000116255886589071            | 8.74140049140049                                                            | 0.767282541000623  |          |        |         |         |         |           |
| 6                                               | 154                             | cognition                                                                   |                    |          |        |         |         |         |           |
| GO:0060316                                      | 0.000145937525678501            | 205.385714285714                                                            | 0.0199294166493668 |          |        |         |         |         |           |
| 2                                               | 4                               | positive regulation of ryanodine-sensitive calcium-release channel activity |                    |          |        |         |         |         |           |
| GO:0006936                                      | 0.000183062333882884            | 6.56690981432361                                                            | 1.19078264479967   |          |        |         |         |         |           |
| 7                                               | 239                             | muscle contraction                                                          |                    |          |        |         |         |         |           |
| GO:1901019                                      | 0.000195520351876022            | 31.2152173913043                                                            | 0.114594145733859  |          |        |         |         |         |           |
| 3                                               | 23                              | regulation of calcium ion transmembrane transporter activity                |                    |          |        |         |         |         |           |
| GO:0010959                                      | 0.000248159509690897            | 7.55342902711324                                                            | 0.881876686734482  |          |        |         |         |         |           |
| 6                                               | 177                             | regulation of metal ion transport                                           |                    |          |        |         |         |         |           |

Stable4\_20PerPair

|            |                                                                    |                  |                    |
|------------|--------------------------------------------------------------------|------------------|--------------------|
| GO:0048738 | 0.000267587318979812                                               | 9.68046132971506 | 0.572970728669296  |
| 5 115      | cardiac muscle tissue development                                  |                  |                    |
| GO:0030336 | 0.000301549867017015                                               | 9.42147668735966 | 0.587917791156321  |
| 5 118      | negative regulation of cell migration                              |                  |                    |
| GO:0006887 | 0.000313294925230738                                               | 5.98879466989703 | 1.30039443637119   |
| 7 261      | exocytosis                                                         |                  |                    |
| GO:0032414 | 0.00031833981772063                                                | 26.0054347826087 | 0.134523562383226  |
| 3 27       | positive regulation of ion transmembrane transporter activity      |                  |                    |
| GO:2000146 | 0.000325944259850793                                               | 9.25632706035042 | 0.597882499481005  |
| 5 120      | negative regulation of cell motility                               |                  |                    |
| GO:0060537 | 0.000410825282283638                                               | 5.71376518218623 | 1.36018268631929   |
| 7 273      | muscle tissue development                                          |                  |                    |
| GO:0051271 | 0.000423261922807407                                               | 8.72094445803768 | 0.632758978617397  |
| 5 127      | negative regulation of cellular component movement                 |                  |                    |
| GO:0006538 | 0.000505853434055779                                               | 82.1371428571429 | 0.0348764791363919 |
| 2 7        | glutamate catabolic process                                        |                  |                    |
| GO:0040013 | 0.000541074983732698                                               | 8.24366539396043 | 0.667635457753789  |
| 5 134      | negative regulation of locomotion                                  |                  |                    |
| GO:0032411 | 0.000635189876702784                                               | 20.1234221598878 | 0.169400041519618  |
| 3 34       | positive regulation of transporter activity                        |                  |                    |
| GO:2001257 | 0.000635189876702784                                               | 20.1234221598878 | 0.169400041519618  |
| 3 34       | regulation of cation channel activity                              |                  |                    |
| GO:0007611 | 0.000682014930807697                                               | 7.81551799824407 | 0.702511936890181  |
| 5 141      | learning or memory                                                 |                  |                    |
| GO:0043269 | 0.000750251098573927                                               | 6.07504288164666 | 1.08615320739049   |
| 6 218      | regulation of ion transport                                        |                  |                    |
| GO:0007517 | 0.000763333622590759                                               | 5.1237525987526  | 1.50965331118954   |
| 303        | muscle organ development                                           |                  | 7                  |
| GO:0007596 | 0.000787887600007132                                               | 4.0578439964943  | 2.48121237284617   |
| 498        | blood coagulation                                                  |                  | 9                  |
| GO:0005513 | 0.000861595699690728                                               | 58.6612244897959 | 0.0448411874610754 |
| 2 9        | detection of calcium ion                                           |                  |                    |
| GO:0072070 | 0.000861595699690728                                               | 58.6612244897959 | 0.0448411874610754 |
| 2 9        | loop of Henle development                                          |                  |                    |
| GO:0006105 | 0.00107352482666513                                                | 51.325           | 0.0498235416234171 |
|            | succinate metabolic process                                        |                  | 2 10               |
| GO:0072017 | 0.00107352482666513                                                | 51.325           | 0.0498235416234171 |
|            | distal tubule development                                          |                  | 2 10               |
| GO:0008016 | 0.00133201158944733                                                | 9.1349104859335  | 0.478305999584804  |
| 96         | regulation of heart contraction                                    |                  | 4                  |
| GO:0031032 | 0.0014483355998319                                                 | 14.8416149068323 | 0.224205937305377  |
| 3 45       | actomyosin structure organization                                  |                  |                    |
| GO:0007507 | 0.00154058927103041                                                | 4.5147187141217  | 1.70396512352086   |
| 342        | heart development                                                  |                  | 7                  |
| GO:0031000 | 0.00156437954967697                                                | 41.0542857142857 | 0.0597882499481005 |
| 2 12       | response to caffeine                                               |                  |                    |
| GO:0060314 | 0.00184286217877313                                                | 37.3194805194805 | 0.0647706041104422 |
| 2 13       | regulation of ryanodine-sensitive calcium-release channel activity |                  |                    |
| GO:0090257 | 0.00191891216477087                                                | 8.23356401384083 | 0.528129541208221  |
| 4 106      | regulation of muscle system process                                |                  |                    |
| GO:0042136 | 0.00214308900724139                                                | 34.2071428571429 | 0.0697529582727839 |
| 2 14       | neurotransmitter biosynthetic process                              |                  |                    |
| GO:0003015 | 0.00266461688964211                                                | 7.49317226890756 | 0.577953082831638  |
| 4 116      | heart process                                                      |                  |                    |
| GO:0032409 | 0.00266461688964211                                                | 7.49317226890756 | 0.577953082831638  |
| 4 116      | regulation of transporter activity                                 |                  |                    |
| GO:0060047 | 0.00266461688964211                                                | 7.49317226890756 | 0.577953082831638  |
| 4 116      | heart contraction                                                  |                  |                    |
| GO:0006688 | 0.00280790683681906                                                | 29.3163265306122 | 0.0797176665974673 |
| 2 16       | glycosphingolipid biosynthetic process                             |                  |                    |
| GO:0043001 | 0.00280790683681906                                                | 29.3163265306122 | 0.0797176665974673 |
| 2 16       | Golgi to plasma membrane protein transport                         |                  |                    |
| GO:0014074 | 0.00317206755337898                                                | 27.36            | 0.084700020759809  |
|            |                                                                    |                  | 2 17               |

STable4\_20PerPair

|                                        |                                                        |                  |                    |       |
|----------------------------------------|--------------------------------------------------------|------------------|--------------------|-------|
| response to purine-containing compound |                                                        |                  |                    |       |
| GO:0009247                             | 0.00355711188038176                                    | 25.6482142857143 | 0.0896823749221507 |       |
| 2 18                                   | glycolipid biosynthetic process                        |                  |                    |       |
| GO:0008015                             | 0.00396248498461866                                    | 4.31037649219467 | 1.50965331118954   |       |
| 6 303                                  | blood circulation                                      |                  |                    |       |
| GO:0048745                             | 0.00396282855922372                                    | 24.1378151260504 | 0.0946647290844924 |       |
| 2 19                                   | smooth muscle tissue development                       |                  |                    |       |
| GO:0003013                             | 0.0040265969460125                                     | 4.29560707748627 | 1.51463566535188   |       |
| 6 304                                  | circulatory system process                             |                  |                    |       |
| GO:0007613                             | 0.00415249566492265                                    | 10.0399719495091 | 0.323853020552211  |       |
| 3 65                                   | memory                                                 |                  |                    |       |
| GO:0006893                             | 0.00438900786712372                                    | 22.7952380952381 | 0.0996470832468341 |       |
| 2 20                                   | Golgi to plasma membrane transport                     |                  |                    |       |
| GO:0009914                             | 0.00442666229475119                                    | 5.01096413666266 | 1.07618849906581   |       |
| 5 216                                  | hormone transport                                      |                  |                    |       |
| GO:0044057                             | 0.00464974491020803                                    | 3.66915572232645 | 2.07764168569649   |       |
| 7 417                                  | regulation of system process                           |                  |                    |       |
| GO:0003001                             | 0.00485744321269216                                    | 4.1258064516129  | 1.57442391529998   | 6     |
| 316                                    | generation of a signal involved in cell-cell signaling |                  |                    |       |
| GO:0023061                             | 0.00485744321269216                                    | 4.1258064516129  | 1.57442391529998   | 6     |
| 316                                    | signal release                                         |                  |                    |       |
| GO:0021846                             | 0.00530192309985648                                    | 20.5128571428571 | 0.109611791571518  |       |
| 2 22                                   | cell proliferation in forebrain                        |                  |                    |       |
| GO:0043462                             | 0.00530192309985648                                    | 20.5128571428571 | 0.109611791571518  |       |
| 2 22                                   | regulation of ATPase activity                          |                  |                    |       |
| GO:0009065                             | 0.00578824717109272                                    | 19.534693877551  | 0.114594145733859  | 2     |
| 23                                     | glutamine family amino acid catabolic process          |                  |                    |       |
| GO:0046676                             | 0.00578824717109272                                    | 19.534693877551  | 0.114594145733859  | 2     |
| 23                                     | negative regulation of insulin secretion               |                  |                    |       |
| GO:0007160                             | 0.00590201814857251                                    | 5.93992490613267 | 0.722441353539547  |       |
| 4 145                                  | cell-matrix adhesion                                   |                  |                    |       |
| GO:0021537                             | 0.00619186632081811                                    | 5.85602632661456 | 0.732406061864231  |       |
| 4 147                                  | telencephalon development                              |                  |                    |       |
| GO:0006939                             | 0.00619594598024957                                    | 8.63949275362319 | 0.373676562175628  |       |
| 3 75                                   | smooth muscle contraction                              |                  |                    |       |
| GO:0060402                             | 0.00619594598024957                                    | 8.63949275362319 | 0.373676562175628  |       |
| 3 75                                   | calcium ion transport into cytosol                     |                  |                    |       |
| GO:0006536                             | 0.00629421014504686                                    | 18.6454545454545 | 0.119576499896201  |       |
| 2 24                                   | glutamate metabolic process                            |                  |                    |       |
| GO:0060401                             | 0.00642779079595319                                    | 8.52054794520548 | 0.37865891633797   |       |
| 3 76                                   | cytosolic calcium ion transport                        |                  |                    |       |
| GO:0051050                             | 0.0064317917407265                                     | 3.4439308398024  | 2.20718289391738   | 7     |
| 443                                    | positive regulation of transport                       |                  |                    |       |
| GO:0042493                             | 0.00651425162205806                                    | 3.8702479338843  | 1.67407099854681   | 6     |
| 336                                    | response to drug                                       |                  |                    |       |
| GO:0042133                             | 0.00681960983346149                                    | 17.8335403726708 | 0.124558854058543  |       |
| 2 25                                   | neurotransmitter metabolic process                     |                  |                    |       |
| GO:0090278                             | 0.00681960983346149                                    | 17.8335403726708 | 0.124558854058543  |       |
| 2 25                                   | negative regulation of peptide hormone secretion       |                  |                    |       |
| GO:0055074                             | 0.00699154709930207                                    | 4.47223627624589 | 1.20074735312435   |       |
| 5 241                                  | calcium ion homeostasis                                |                  |                    |       |
| GO:0061041                             | 0.00715417588426707                                    | 8.1824942791762  | 0.393605978824995  | 3     |
| 79                                     | regulation of wound healing                            |                  |                    |       |
| GO:0002792                             | 0.00736424552645795                                    | 17.0892857142857 | 0.129541208220884  |       |
| 2 26                                   | negative regulation of peptide secretion               |                  |                    |       |
| GO:0030073                             | 0.0076135643941621                                     | 5.50580495356037 | 0.777247249325306  |       |
| 4 156                                  | insulin secretion                                      |                  |                    |       |
| GO:0030900                             | 0.00773543425806473                                    | 4.3595041322314  | 1.2306414780984    | 5 247 |
| forebrain development                  |                                                        |                  |                    |       |
| GO:0006904                             | 0.00792791798315694                                    | 16.4045714285714 | 0.134523562383226  |       |
| 2 27                                   | vesicle docking involved in exocytosis                 |                  |                    |       |
| GO:0002576                             | 0.00819567359848294                                    | 7.77119565217391 | 0.413535395474362  |       |
| 3 83                                   | platelet degranulation                                 |                  |                    |       |

Stable4\_20PerPair

|                                                 |                                                    |                  |                   |                    |          |                   |                    |          |      |
|-------------------------------------------------|----------------------------------------------------|------------------|-------------------|--------------------|----------|-------------------|--------------------|----------|------|
| GO:0010035                                      | 0.00889084358501993                                | 3.6121555498326  | 1.78866514428067  | 6                  |          |                   |                    |          |      |
| 359                                             | response to inorganic substance                    |                  |                   |                    |          |                   |                    |          |      |
| GO:0072507                                      | 0.008952363897252                                  | 4.20051138728667 | 1.27548266555948  |                    |          |                   |                    |          |      |
| 5                                               | 256 divalent inorganic cation homeostasis          |                  |                   |                    |          |                   |                    |          |      |
| GO:0007269                                      | 0.00903239820985746                                | 7.48873755893138 | 0.428482457961387 |                    |          |                   |                    |          |      |
| 3                                               | 86 neurotransmitter secretion                      |                  |                   |                    |          |                   |                    |          |      |
| GO:0048278                                      | 0.00911158351324811                                | 15.1873015873016 | 0.144488270707909 |                    |          |                   |                    |          |      |
| 2                                               | 29 vesicle docking                                 |                  |                   |                    |          |                   |                    |          |      |
| GO:0034329                                      | 0.00942866610108447                                | 5.16230936819172 | 0.827070790948723 |                    |          |                   |                    |          |      |
| 4                                               | 166 cell junction assembly                         |                  |                   |                    |          |                   |                    |          |      |
| GO:0055024                                      | 0.00973118536622807                                | 14.6438775510204 | 0.149470624870251 |                    |          |                   |                    |          |      |
| 2                                               | 30 regulation of cardiac muscle tissue development |                  |                   |                    |          |                   |                    |          |      |
| GO:0014706                                      | 0.00983373807336037                                | 4.10070271212033 | 1.30537679053353  |                    |          |                   |                    |          |      |
| 5                                               | 262 striated muscle tissue development             |                  |                   |                    |          |                   |                    |          |      |
| GO:0006937                                      | 0.00991744843816333                                | 7.22598584428716 | 0.443429520448412 |                    |          |                   |                    |          |      |
| 3                                               | 89 regulation of muscle contraction                |                  |                   |                    |          |                   |                    |          |      |
| Tissue: whole_Blood=>Nerve_Tibial Type: cluster |                                                    |                  |                   |                    |          |                   |                    |          |      |
| SourceGene: TNKS2(ENSG00000107854.5)            |                                                    |                  |                   |                    |          |                   |                    |          |      |
| TargetGeneSet:                                  | ACTA1                                              | ACTN2            | ADSS              | HPCAL1             | WDR92    | PROM2             | XIRP2              | HHATL    |      |
| LMOD3                                           | RP11                                               | GBA3             | PCDHGA10          | PLAC8L1            | SCARNA15 |                   | RP1                | GATS     |      |
| ANKRD7                                          | LMOD2                                              | PARP12           | CTA               | JAK2               | C9orf123 | VSIG2             |                    | TIMELESS |      |
| ATP2B1                                          | MYBPC1                                             | CORO1C           | MYL2              | WDR66              | STX2     | TEX26-AS1         | VPS36              | MYH7     | CTD  |
| ACYP1                                           | ATXN3                                              | MESP2            | HDDC3             | MYLPF              | NQO1     | SERPINF2          | MYH2               | MYH1     | TCAP |
| ASB16                                           | PODNL1                                             | SAMD1            | MAST3             | CKM                | EBF4     | DEFB124           | PVALB              | RP13     |      |
| GOBPID                                          | Pvalue                                             | OddsRatio        | ExpCount          | Count              | Size     | Term              |                    |          |      |
| GO:0030049                                      | 3.7567733468774e-12                                |                  | 112.375           | 0.0944571309943949 |          |                   | 7                  | 39       |      |
| muscle filament sliding                         |                                                    |                  |                   |                    |          |                   |                    |          |      |
| GO:0033275                                      | 3.7567733468774e-12                                |                  | 112.375           | 0.0944571309943949 |          |                   | 7                  | 39       |      |
| actin-myosin filament sliding                   |                                                    |                  |                   |                    |          |                   |                    |          |      |
| GO:0070252                                      | 6.55590847956634e-12                               |                  | 102.721428571429  |                    |          |                   | 0.10172306414781   |          |      |
| 7                                               | 42 actin-mediated cell contraction                 |                  |                   |                    |          |                   |                    |          |      |
| GO:0030048                                      | 8.05397457089499e-11                               |                  | 69.0576923076923  |                    |          |                   | 0.142896685350495  |          |      |
| 7                                               | 59 actin filament-based movement                   |                  |                   |                    |          |                   |                    |          |      |
| GO:0030029                                      | 1.95846619359972e-10                               |                  | 17.3863354037267  |                    |          |                   | 1.04629437409176   |          |      |
| 12                                              | 432 actin filament-based process                   |                  |                   |                    |          |                   |                    |          |      |
| GO:0006936                                      | 7.97107515811943e-08                               |                  | 18.1946448613115  |                    |          |                   | 0.578852674555394  |          |      |
| 8                                               | 239 muscle contraction                             |                  |                   |                    |          |                   |                    |          |      |
| GO:0003012                                      | 1.81534971904396e-07                               |                  | 16.2595463680735  |                    |          |                   | 0.644246072936129  |          |      |
| 8                                               | 266 muscle system process                          |                  |                   |                    |          |                   |                    |          |      |
| GO:0030036                                      | 3.19301154275041e-06                               |                  | 10.9147467677651  |                    |          |                   | 0.942149332226143  |          |      |
| 8                                               | 389 actin cytoskeleton organization                |                  |                   |                    |          |                   |                    |          |      |
| GO:0030240                                      | 5.67278352594166e-05                               |                  | 291.171717171717  |                    |          |                   | 0.012109888589025  |          |      |
| 2                                               | 5 skeletal muscle thin filament assembly           |                  |                   |                    |          |                   |                    |          |      |
| GO:0030239                                      | 7.39750452420471e-05                               |                  | 43.5030241935484  |                    |          |                   | 0.0823472424053699 |          |      |
| 3                                               | 34 myofibril assembly                              |                  |                   |                    |          |                   |                    |          |      |
| GO:0014866                                      | 8.49622464313458e-05                               |                  | 218.363636363636  |                    |          |                   | 0.01453186630683   |          |      |
| 2                                               | 6 skeletal myofibril assembly                      |                  |                   |                    |          |                   |                    |          |      |
| GO:0031032                                      | 0.000172246368667096                               |                  | 32.0848214285714  |                    |          |                   | 0.108988997301225  |          |      |
| 3                                               | 45 actomyosin structure organization               |                  |                   |                    |          |                   |                    |          |      |
| GO:0055008                                      | 0.000172246368667096                               |                  | 32.0848214285714  |                    |          |                   | 0.108988997301225  |          |      |
| 3                                               | 45 cardiac muscle tissue morphogenesis             |                  |                   |                    |          |                   |                    |          |      |
| GO:0060415                                      | 0.000235951485266959                               |                  | 28.6615691489362  |                    |          |                   | 0.12109888589025   |          |      |
| 3                                               | 50 muscle tissue morphogenesis                     |                  |                   |                    |          |                   |                    |          |      |
| GO:0048644                                      | 0.000330399990462283                               |                  | 25.40625          |                    |          | 0.13563075219708  |                    | 3        |      |
| 56                                              | muscle organ morphogenesis                         |                  |                   |                    |          |                   |                    |          |      |
| GO:0014706                                      | 0.000392217106967774                               |                  | 9.1822308690013   |                    |          | 0.634558162064909 |                    | 5        |      |
| 262                                             | striated muscle tissue development                 |                  |                   |                    |          |                   |                    |          |      |
| GO:0007512                                      | 0.000437120856360053                               |                  | 79.366391184573   |                    |          | 0.031485710331465 |                    | 2        |      |
| 13                                              | adult heart development                            |                  |                   |                    |          |                   |                    |          |      |
| GO:0060537                                      | 0.000473391710426235                               |                  | 8.79850746268657  |                    |          |                   | 0.661199916960764  |          |      |
| 5                                               | 273 muscle tissue development                      |                  |                   |                    |          |                   |                    |          |      |
| GO:0055003                                      | 0.000509199036496687                               |                  | 72.7474747474748  |                    |          |                   | 0.0339076880492699 |          |      |
| 2                                               | 14 cardiac myofibril assembly                      |                  |                   |                    |          |                   |                    |          |      |

Stable4\_20PerPair

|            |                      |                                                       |                     |
|------------|----------------------|-------------------------------------------------------|---------------------|
| GO:0009582 | 0.000611186812061313 | 20.3835227272727                                      | 0.167116462528545   |
| 3          | 69                   | detection of abiotic stimulus                         |                     |
| GO:0007517 | 0.000759638955051211 | 7.89597315436242                                      | 0.733859248494914   |
| 5          | 303                  | muscle organ development                              |                     |
| GO:0006941 | 0.000779905647422016 | 18.6770833333333                                      | 0.181648328835375   |
| 3          | 75                   | striated muscle contraction                           |                     |
| GO:0003009 | 0.000949598362949957 | 51.3333333333333                                      | 0.0460175766382949  |
| 2          | 19                   | skeletal muscle contraction                           |                     |
| GO:0007015 | 0.00121336722967996  | 9.60986319878399                                      | 0.472285654971974   |
| 4          | 195                  | actin filament organization                           |                     |
| GO:0050879 | 0.00178569731497192  | 36.3434343434343                                      | 0.0629714206629299  |
| 2          | 26                   | multicellular organismal movement                     |                     |
| GO:0050881 | 0.00178569731497192  | 36.3434343434343                                      | 0.0629714206629299  |
| 2          | 26                   | musculoskeletal movement                              |                     |
| GO:0055002 | 0.00217429696375201  | 12.9014423076923                                      | 0.259151615805135   |
| 3          | 107                  | striated muscle cell development                      |                     |
| GO:0055006 | 0.00237561555054854  | 31.1428571428571                                      | 0.0726593315341499  |
| 2          | 30                   | cardiac cell development                              |                     |
| GO:0055013 | 0.00237561555054854  | 31.1428571428571                                      | 0.0726593315341499  |
| 2          | 30                   | cardiac muscle cell development                       |                     |
| GO:0048738 | 0.00266920318368344  | 11.9732142857143                                      | 0.278527437547575   |
| 3          | 115                  | cardiac muscle tissue development                     |                     |
| GO:0048729 | 0.00270899736842517  | 5.85505430242272                                      | 0.978478997993218   |
| 5          | 404                  | tissue morphogenesis                                  |                     |
| GO:0003015 | 0.00273554558956226  | 11.8664269911504                                      | 0.28094941526538    |
| 3          | 116                  | heart process                                         |                     |
| GO:0060047 | 0.00273554558956226  | 11.8664269911504                                      | 0.28094941526538    |
| 3          | 116                  | heart contraction                                     |                     |
| GO:0061061 | 0.00285682197027174  | 5.78052805280528                                      | 0.990588886582243   |
| 5          | 409                  | muscle structure development                          |                     |
| GO:0055010 | 0.00287040793370604  | 28.1231671554252                                      | 0.0799252646875649  |
| 2          | 33                   | ventricular cardiac muscle tissue morphogenesis       |                     |
| GO:0010927 | 0.00322860047606374  | 11.16875                                              | 0.297903259290015   |
| 123        |                      | cellular component assembly involved in morphogenesis | 3                   |
| GO:0003229 | 0.00340936807507379  | 25.6363636363636                                      | 0.0871911978409799  |
| 2          | 36                   | ventricular cardiac muscle tissue development         |                     |
| GO:0055001 | 0.00369204463956754  | 10.6324404761905                                      | 0.312435125596844   |
| 3          | 129                  | muscle cell development                               |                     |
| GO:0008015 | 0.0059460696451267   | 6.09213507390225                                      | 0.733859248494914   |
| 4          | 303                  | blood circulation                                     |                     |
| GO:0003013 | 0.0060150705329335   | 6.07139784946237                                      | 0.736281226212719   |
| 4          | 304                  | circulatory system process                            |                     |
| GO:0003007 | 0.00638223642454908  | 8.68222402597403                                      | 0.380250501695384   |
| 3          | 157                  | heart morphogenesis                                   |                     |
| GO:0030035 | 0.00724884985550822  | 211.970588235294                                      | 0.00726593315341499 |
| 1          | 3                    | microspike assembly                                   |                     |
| GO:0030241 | 0.00724884985550822  | 211.970588235294                                      | 0.00726593315341499 |
| 1          | 3                    | skeletal muscle myosin thick filament assembly        |                     |
| GO:0031034 | 0.00724884985550822  | 211.970588235294                                      | 0.00726593315341499 |
| 1          | 3                    | myosin filament assembly                              |                     |
| GO:0035722 | 0.00724884985550822  | 211.970588235294                                      | 0.00726593315341499 |
| 1          | 3                    | interleukin-12-mediated signaling pathway             |                     |
| GO:0035845 | 0.00724884985550822  | 211.970588235294                                      | 0.00726593315341499 |
| 1          | 3                    | photoreceptor cell outer segment organization         |                     |
| GO:0035962 | 0.00724884985550822  | 211.970588235294                                      | 0.00726593315341499 |
| 1          | 3                    | response to interleukin-13                            |                     |
| GO:0042396 | 0.00724884985550822  | 211.970588235294                                      | 0.00726593315341499 |
| 1          | 3                    | phosphagen biosynthetic process                       |                     |
| GO:0044208 | 0.00724884985550822  | 211.970588235294                                      | 0.00726593315341499 |
| 1          | 3                    | 'de novo' AMP biosynthetic process                    |                     |
| GO:0048769 | 0.00724884985550822  | 211.970588235294                                      | 0.00726593315341499 |
| 1          | 3                    | sarcomerogenesis                                      |                     |
| GO:0071349 | 0.00724884985550822  | 211.970588235294                                      | 0.00726593315341499 |

STable4\_20PerPair

|                                                               |        |                                                             |                  |       |      |                     |  |                     |
|---------------------------------------------------------------|--------|-------------------------------------------------------------|------------------|-------|------|---------------------|--|---------------------|
| 1                                                             | 3      | cellular response to interleukin-12                         |                  |       |      |                     |  |                     |
| GO:0071688                                                    |        | 0.00724884985550822                                         | 211.970588235294 |       |      |                     |  | 0.00726593315341499 |
| 1                                                             | 3      | striated muscle myosin thick filament assembly              |                  |       |      |                     |  |                     |
| GO:0001756                                                    |        | 0.0072677375634005                                          | 17.0707070707071 |       |      |                     |  | 0.128364819043665   |
| 2                                                             | 53     | somitogenesis                                               |                  |       |      |                     |  |                     |
| GO:0003208                                                    |        | 0.0072677375634005                                          | 17.0707070707071 |       |      |                     |  | 0.128364819043665   |
| 2                                                             | 53     | cardiac ventricle morphogenesis                             |                  |       |      |                     |  |                     |
| GO:0051146                                                    |        | 0.00781536665211651                                         | 8.04781626506024 |       |      |                     |  | 0.409314234309044   |
| 3                                                             | 169    | striated muscle cell differentiation                        |                  |       |      |                     |  |                     |
| GO:0055007                                                    |        | 0.00808537298117971                                         | 16.1189674523008 |       |      |                     |  | 0.13563075219708    |
| 2                                                             | 56     | cardiac muscle cell differentiation                         |                  |       |      |                     |  |                     |
| GO:0007507                                                    |        | 0.00904992431093262                                         | 5.37430807405994 |       |      |                     |  | 0.828316379489309   |
| 4                                                             | 342    | heart development                                           |                  |       |      |                     |  |                     |
| GO:0000920                                                    |        | 0.00965377027737002                                         | 141.303921568627 |       |      |                     |  | 0.00968791087121998 |
| 1                                                             | 4      | cytokinetic cell separation                                 |                  |       |      |                     |  |                     |
| GO:0002034                                                    |        | 0.00965377027737002                                         | 141.303921568627 |       |      |                     |  | 0.00968791087121998 |
| 1                                                             | 4      | regulation of blood vessel size by renin-angiotensin        |                  |       |      |                     |  |                     |
| GO:0003010                                                    |        | 0.00965377027737002                                         | 141.303921568627 |       |      |                     |  | 0.00968791087121998 |
| 1                                                             | 4      | voluntary skeletal muscle contraction                       |                  |       |      |                     |  |                     |
| GO:0003072                                                    |        | 0.00965377027737002                                         | 141.303921568627 |       |      |                     |  | 0.00968791087121998 |
| 1                                                             | 4      | renal control of peripheral vascular resistance involved in |                  |       |      |                     |  |                     |
| regulation of systemic arterial blood pressure                |        |                                                             |                  |       |      |                     |  |                     |
| GO:0006498                                                    |        | 0.00965377027737002                                         | 141.303921568627 |       |      |                     |  | 0.00968791087121998 |
| 1                                                             | 4      | N-terminal protein lipidation                               |                  |       |      |                     |  |                     |
| GO:0007509                                                    |        | 0.00965377027737002                                         | 141.303921568627 |       |      |                     |  | 0.00968791087121998 |
| 1                                                             | 4      | mesoderm migration involved in gastrulation                 |                  |       |      |                     |  |                     |
| GO:0010757                                                    |        | 0.00965377027737002                                         | 141.303921568627 |       |      |                     |  | 0.00968791087121998 |
| 1                                                             | 4      | negative regulation of plasminogen activation               |                  |       |      |                     |  |                     |
| GO:0014721                                                    |        | 0.00965377027737002                                         | 141.303921568627 |       |      |                     |  | 0.00968791087121998 |
| 1                                                             | 4      | twitch skeletal muscle contraction                          |                  |       |      |                     |  |                     |
| GO:0031033                                                    |        | 0.00965377027737002                                         | 141.303921568627 |       |      |                     |  | 0.00968791087121998 |
| 1                                                             | 4      | myosin filament organization                                |                  |       |      |                     |  |                     |
| GO:0060398                                                    |        | 0.00965377027737002                                         | 141.303921568627 |       |      |                     |  | 0.00968791087121998 |
| 1                                                             | 4      | regulation of growth hormone receptor signaling pathway     |                  |       |      |                     |  |                     |
| GO:0070671                                                    |        | 0.00965377027737002                                         | 141.303921568627 |       |      |                     |  | 0.00968791087121998 |
| 1                                                             | 4      | response to interleukin-12                                  |                  |       |      |                     |  |                     |
| GO:0061053                                                    |        | 0.00983857231101985                                         | 14.5010101010101 |       |      |                     |  | 0.15016261850391    |
| 2                                                             | 62     | somite development                                          |                  |       |      |                     |  |                     |
| Tissue: whole_Blood=>Skin_Sun_Exposed_Lower_leg Type: cluster |        |                                                             |                  |       |      |                     |  |                     |
| SourceGene: 7SK(ENSG00000222448.1)                            |        |                                                             |                  |       |      |                     |  |                     |
| TargetGeneSet: RP4 TRAF3IP3 RP11 HYAL2 IQCF1 BAP1 ZCCHC9      |        |                                                             |                  |       |      |                     |  |                     |
| YWHAZP4 RP3 CNKSR3 BRAF ZNF214 RP1 RNU4-2 RPL29P24 FAM155A    |        |                                                             |                  |       |      |                     |  |                     |
| RN7SL1 HMGB1P14 SNORD3A RAMP2 ZNF446 ZNF585A RPS27AP2 CTD     |        |                                                             |                  |       |      |                     |  |                     |
| GOBPID                                                        | Pvalue | OddsRatio                                                   | ExpCount         | Count | Size | Term                |  |                     |
| GO:0071482                                                    |        | 2.77877873389443e-06                                        | 149.058620689655 |       |      | 0.0287869351601965  |  |                     |
| 3                                                             | 32     | cellular response to light stimulus                         |                  |       |      |                     |  |                     |
| GO:0071478                                                    |        | 1.70546908144403e-05                                        | 78.4527272727273 |       |      | 0.0521763199778562  |  |                     |
| 3                                                             | 58     | cellular response to radiation                              |                  |       |      |                     |  |                     |
| GO:0007603                                                    |        | 4.09013235940024e-05                                        | 291.494949494949 |       |      | 0.00989550896131756 |  |                     |
| 2                                                             | 11     | phototransduction, visible light                            |                  |       |      |                     |  |                     |
| GO:0009584                                                    |        | 0.000140651479709995                                        | 145.656565656566 |       |      | 0.0179918344751228  |  |                     |
| 2                                                             | 20     | detection of visible light                                  |                  |       |      |                     |  |                     |
| GO:0071214                                                    |        | 0.000199261435692489                                        | 33.2767441860465 |       |      | 0.118746107535811   |  |                     |
| 3                                                             | 132    | cellular response to abiotic stimulus                       |                  |       |      |                     |  |                     |
| GO:0007602                                                    |        | 0.000388292739320376                                        | 84.4985337243402 |       |      | 0.0296865268839527  |  |                     |
| 2                                                             | 33     | phototransduction                                           |                  |       |      |                     |  |                     |
| GO:0009416                                                    |        | 0.000537138568596664                                        | 23.4989010989011 |       |      | 0.166424468894886   |  |                     |
| 3                                                             | 185    | response to light stimulus                                  |                  |       |      |                     |  |                     |
| GO:0009583                                                    |        | 0.0005715802987313                                          | 68.8995215311005 |       |      | 0.0359836689502457  |  |                     |
| 2                                                             | 40     | detection of light stimulus                                 |                  |       |      |                     |  |                     |
| GO:0033135                                                    |        | 0.00063029672839942                                         | 65.4454545454546 |       |      | 0.0377828523977579  |  |                     |
| 2                                                             | 42     | regulation of peptidyl-serine phosphorylation               |                  |       |      |                     |  |                     |
| GO:0007601                                                    |        | 0.000714204087430938                                        | 21.2492537313433 |       |      | 0.183516711646253   |  |                     |

STable4\_20PerPair

|            |     |                                                             |                  |                     |   |                     |   |
|------------|-----|-------------------------------------------------------------|------------------|---------------------|---|---------------------|---|
| 3          | 204 | visual perception                                           |                  |                     |   |                     |   |
| GO:0050953 |     | 0.000724433314894387                                        | 21.1425742574257 |                     |   | 0.184416303370009   |   |
| 3          | 205 | sensory perception of light stimulus                        |                  |                     |   |                     |   |
| GO:0071363 |     | 0.00150526715642086                                         | 16.2954022988506 |                     |   | 0.237492215071621   |   |
| 3          | 264 | cellular response to growth factor stimulus                 |                  |                     |   |                     |   |
| GO:0009582 |     | 0.00169402920286438                                         | 38.9986431478969 |                     |   | 0.0620718289391738  |   |
| 2          | 69  | detection of abiotic stimulus                               |                  |                     |   |                     |   |
| GO:0070848 |     | 0.00183732977575354                                         | 15.1692857142857 |                     |   | 0.254584457822988   |   |
| 3          | 283 | response to growth factor stimulus                          |                  |                     |   |                     |   |
| GO:0009314 |     | 0.0020490314227549                                          | 14.5845360824742 |                     |   | 0.264479966784306   |   |
| 3          | 294 | response to radiation                                       |                  |                     |   |                     |   |
| GO:0009581 |     | 0.00261658971536627                                         | 31.0692640692641 |                     |   | 0.0773648882430282  |   |
| 2          | 86  | detection of external stimulus                              |                  |                     |   |                     |   |
| GO:0010764 |     | 0.00269653454263397                                         | 601.5            | 0.00269877517126842 | 1 |                     | 3 |
|            |     | negative regulation of fibroblast migration                 |                  |                     |   |                     |   |
| GO:0016056 |     | 0.00269653454263397                                         | 601.5            | 0.00269877517126842 | 1 |                     | 3 |
|            |     | rhodopsin mediated signaling pathway                        |                  |                     |   |                     |   |
| GO:0035845 |     | 0.00269653454263397                                         | 601.5            | 0.00269877517126842 | 1 |                     | 3 |
|            |     | photoreceptor cell outer segment organization               |                  |                     |   |                     |   |
| GO:0060041 |     | 0.00311650019369354                                         | 28.3517786561265 |                     |   | 0.0845616220330773  |   |
| 2          | 94  | retina development in camera-type eye                       |                  |                     |   |                     |   |
| GO:0019087 |     | 0.0035938867748424                                          | 400.972222222222 |                     |   | 0.00359836689502457 |   |
| 1          | 4   | transformation of host cell by virus                        |                  |                     |   |                     |   |
| GO:0071711 |     | 0.0035938867748424                                          | 400.972222222222 |                     |   | 0.00359836689502457 |   |
| 1          | 4   | basement membrane organization                              |                  |                     |   |                     |   |
| GO:0097084 |     | 0.0035938867748424                                          | 400.972222222222 |                     |   | 0.00359836689502457 |   |
| 1          | 4   | vascular smooth muscle cell development                     |                  |                     |   |                     |   |
| GO:2000482 |     | 0.0035938867748424                                          | 400.972222222222 |                     |   | 0.00359836689502457 |   |
| 1          | 4   | regulation of interleukin-8 secretion                       |                  |                     |   |                     |   |
| GO:2000484 |     | 0.0035938867748424                                          | 400.972222222222 |                     |   | 0.00359836689502457 |   |
| 1          | 4   | positive regulation of interleukin-8 secretion              |                  |                     |   |                     |   |
| GO:2000778 |     | 0.0035938867748424                                          | 400.972222222222 |                     |   | 0.00359836689502457 |   |
| 1          | 4   | positive regulation of interleukin-6 secretion              |                  |                     |   |                     |   |
| GO:0018105 |     | 0.00365776828014685                                         | 26.0690909090909 |                     |   | 0.0917583558231264  |   |
| 2          | 102 | peptidyl-serine phosphorylation                             |                  |                     |   |                     |   |
| GO:0070372 |     | 0.00401682870042583                                         | 24.8190476190476 |                     |   | 0.0962563144419071  |   |
| 2          | 107 | regulation of ERK1 and ERK2 cascade                         |                  |                     |   |                     |   |
| GO:0071493 |     | 0.00449049364629872                                         | 300.708333333333 |                     |   | 0.00449795861878071 |   |
| 1          | 5   | cellular response to UV-B                                   |                  |                     |   |                     |   |
| GO:0072604 |     | 0.00449049364629872                                         | 300.708333333333 |                     |   | 0.00449795861878071 |   |
| 1          | 5   | interleukin-6 secretion                                     |                  |                     |   |                     |   |
| GO:0072606 |     | 0.00449049364629872                                         | 300.708333333333 |                     |   | 0.00449795861878071 |   |
| 1          | 5   | interleukin-8 secretion                                     |                  |                     |   |                     |   |
| GO:2001214 |     | 0.00449049364629872                                         | 300.708333333333 |                     |   | 0.00449795861878071 |   |
| 1          | 5   | positive regulation of vasculogenesis                       |                  |                     |   |                     |   |
| GO:0010741 |     | 0.00454606583917059                                         | 23.2564935064935 |                     |   | 0.1025534565082     | 2 |
| 114        |     | negative regulation of intracellular protein kinase cascade |                  |                     |   |                     |   |
| GO:0018209 |     | 0.00454606583917059                                         | 23.2564935064935 |                     |   | 0.1025534565082     | 2 |
| 114        |     | peptidyl-serine modification                                |                  |                     |   |                     |   |
| GO:0070371 |     | 0.00535522473114787                                         | 21.3353204172876 |                     |   | 0.111549373745762   |   |
| 2          | 124 | ERK1 and ERK2 cascade                                       |                  |                     |   |                     |   |
| GO:0000244 |     | 0.00538635572456225                                         | 240.55           | 0.00539755034253685 | 1 |                     | 6 |
|            |     | assembly of spliceosomal tri-snRNP                          |                  |                     |   |                     |   |
| GO:0009586 |     | 0.00538635572456225                                         | 240.55           | 0.00539755034253685 | 1 |                     | 6 |
|            |     | rhodopsin mediated phototransduction                        |                  |                     |   |                     |   |
| GO:0030214 |     | 0.00538635572456225                                         | 240.55           | 0.00539755034253685 | 1 |                     | 6 |
|            |     | hyaluronan catabolic process                                |                  |                     |   |                     |   |
| GO:0046548 |     | 0.00538635572456225                                         | 240.55           | 0.00539755034253685 | 1 |                     | 6 |
|            |     | retinal rod cell development                                |                  |                     |   |                     |   |
| GO:0070295 |     | 0.00538635572456225                                         | 240.55           | 0.00539755034253685 | 1 |                     | 6 |
|            |     | renal water absorption                                      |                  |                     |   |                     |   |
| GO:2001212 |     | 0.00538635572456225                                         | 240.55           | 0.00539755034253685 | 1 |                     | 6 |
|            |     | regulation of vasculogenesis                                |                  |                     |   |                     |   |

Stable4\_20PerPair

|                                                                  |                     |                                                                |                     |         |          |                   |           |        |       |
|------------------------------------------------------------------|---------------------|----------------------------------------------------------------|---------------------|---------|----------|-------------------|-----------|--------|-------|
| GO:0034333                                                       | 0.00628147357680053 | 200.4444444444444                                              | 0.00629714206629299 |         |          |                   |           |        |       |
| 1                                                                | 7                   | adherens junction assembly                                     |                     |         |          |                   |           |        |       |
| GO:0035518                                                       | 0.00628147357680053 | 200.4444444444444                                              | 0.00629714206629299 |         |          |                   |           |        |       |
| 1                                                                | 7                   | histone H2A monoubiquitination                                 |                     |         |          |                   |           |        |       |
| GO:0042117                                                       | 0.00628147357680053 | 200.4444444444444                                              | 0.00629714206629299 |         |          |                   |           |        |       |
| 1                                                                | 7                   | monocyte activation                                            |                     |         |          |                   |           |        |       |
| GO:0033137                                                       | 0.00717584776978741 | 171.797619047619                                               | 0.00719673379004913 |         |          |                   |           |        |       |
| 1                                                                | 8                   | negative regulation of peptidyl-serine phosphorylation         |                     |         |          |                   |           |        |       |
| GO:0042670                                                       | 0.00717584776978741 | 171.797619047619                                               | 0.00719673379004913 |         |          |                   |           |        |       |
| 1                                                                | 8                   | retinal cone cell differentiation                              |                     |         |          |                   |           |        |       |
| GO:0043116                                                       | 0.00717584776978741 | 171.797619047619                                               | 0.00719673379004913 |         |          |                   |           |        |       |
| 1                                                                | 8                   | negative regulation of vascular permeability                   |                     |         |          |                   |           |        |       |
| GO:0046549                                                       | 0.00717584776978741 | 171.797619047619                                               | 0.00719673379004913 |         |          |                   |           |        |       |
| 1                                                                | 8                   | retinal cone cell development                                  |                     |         |          |                   |           |        |       |
| GO:0044344                                                       | 0.00794527228135684 | 17.3187878787879                                               | 0.136737942010934   |         |          |                   |           |        |       |
| 2                                                                | 152                 | cellular response to fibroblast growth factor stimulus         |                     |         |          |                   |           |        |       |
| GO:0071774                                                       | 0.00794527228135684 | 17.3187878787879                                               | 0.136737942010934   |         |          |                   |           |        |       |
| 2                                                                | 152                 | response to fibroblast growth factor stimulus                  |                     |         |          |                   |           |        |       |
| GO:0003097                                                       | 0.00806947886990461 | 150.3125                                                       | 0.00809632551380527 |         |          |                   |           |        |       |
| 9                                                                |                     | renal water transport                                          | 1                   |         |          |                   |           |        |       |
| GO:0010762                                                       | 0.00806947886990461 | 150.3125                                                       | 0.00809632551380527 |         |          |                   |           |        |       |
| 9                                                                |                     | regulation of fibroblast migration                             | 1                   |         |          |                   |           |        |       |
| GO:0035082                                                       | 0.00806947886990461 | 150.3125                                                       | 0.00809632551380527 |         |          |                   |           |        |       |
| 9                                                                |                     | axoneme assembly                                               | 1                   |         |          |                   |           |        |       |
| GO:0035886                                                       | 0.00806947886990461 | 150.3125                                                       | 0.00809632551380527 |         |          |                   |           |        |       |
| 9                                                                |                     | vascular smooth muscle cell differentiation                    | 1                   |         |          |                   |           |        |       |
| GO:2000352                                                       | 0.00806947886990461 | 150.3125                                                       | 0.00809632551380527 |         |          |                   |           |        |       |
| 9                                                                |                     | negative regulation of endothelial cell apoptotic process      | 1                   |         |          |                   |           |        |       |
| GO:0007600                                                       | 0.00812273753351948 | 8.78050314465409                                               | 0.431804027402948   |         |          |                   |           |        |       |
| 3                                                                | 480                 | sensory perception                                             |                     |         |          |                   |           |        |       |
| GO:0035810                                                       | 0.00896236744314161 | 133.601851851852                                               | 0.00899591723756141 |         |          |                   |           |        |       |
| 1                                                                | 10                  | positive regulation of urine volume                            |                     |         |          |                   |           |        |       |
| GO:0050908                                                       | 0.00985451405509652 | 120.2333333333333                                              | 0.00989550896131756 |         |          |                   |           |        |       |
| 1                                                                | 11                  | detection of light stimulus involved in visual perception      |                     |         |          |                   |           |        |       |
| GO:0050962                                                       | 0.00985451405509652 | 120.2333333333333                                              | 0.00989550896131756 |         |          |                   |           |        |       |
| 1                                                                | 11                  | detection of light stimulus involved in sensory perception     |                     |         |          |                   |           |        |       |
| Tissue: whole_Blood=>Skin_Sun_Exposed_Lower_leg Type: asymmetric |                     |                                                                |                     |         |          |                   |           |        |       |
| SourceGene: CELF4(ENSG00000101489.10)                            |                     |                                                                |                     |         |          |                   |           |        |       |
| TargetGeneSet:                                                   | GNB1                | RPL11                                                          | FAM176B             | BTBD19  | RP4      | RP11              | LINC00568 |        |       |
| NCSTN                                                            | SYT2                | THPO                                                           | RPS7                | UBC     | RPL31    | BTF3L4P2          | MYEOV2    | CCDC72 |       |
| RPL24                                                            | RPL35A              | RPL37                                                          | NSA2                | CTD     | TOMM7    | AKR1B10           | TCEB1     | TXN    | RPS24 |
| USMG5                                                            | RPS13               | COMMD6                                                         | NDUFB1              | RPS3AP6 | EME2     | NOMO1             | RPS7P1    | RPL17  | RPL27 |
| POLR2E                                                           | CAPNS1              | KDELRL1                                                        | ZNFX1-AS1           |         | EEF1B2P3 |                   |           |        |       |
| GOBPID                                                           | Pvalue              | OddsRatio                                                      | ExpCount            | Count   | Size     | Term              |           |        |       |
| GO:0019080                                                       |                     | 6.1554212472483e-19                                            | 84.0996376811594    |         |          | 0.303024012179088 |           |        |       |
| 13                                                               | 151                 | viral genome expression                                        |                     |         |          |                   |           |        |       |
| GO:0019083                                                       |                     | 6.1554212472483e-19                                            | 84.0996376811594    |         |          | 0.303024012179088 |           |        |       |
| 13                                                               | 151                 | viral transcription                                            |                     |         |          |                   |           |        |       |
| GO:0070972                                                       |                     | 2.28826561363151e-18                                           | 95.3340732519423    |         |          | 0.236800221437963 |           |        |       |
| 12                                                               | 118                 | protein localization to endoplasmic reticulum                  |                     |         |          |                   |           |        |       |
| GO:0006415                                                       |                     | 1.04293495901498e-17                                           | 109.5569444444444   |         |          | 0.182617119922497 |           |        |       |
| 11                                                               | 91                  | translational termination                                      |                     |         |          |                   |           |        |       |
| GO:0006414                                                       |                     | 5.40296037411533e-17                                           | 93.1489361702128    |         |          | 0.210712061449035 |           |        |       |
| 11                                                               | 105                 | translational elongation                                       |                     |         |          |                   |           |        |       |
| GO:0006614                                                       |                     | 5.40296037411533e-17                                           | 93.1489361702128    |         |          | 0.210712061449035 |           |        |       |
| 11                                                               | 105                 | SRP-dependent cotranslational protein targeting to membrane    |                     |         |          |                   |           |        |       |
| GO:0006613                                                       |                     | 6.02164137774053e-17                                           | 92.1619883040936    |         |          | 0.212718842986645 |           |        |       |
| 11                                                               | 106                 | cotranslational protein targeting to membrane                  |                     |         |          |                   |           |        |       |
| GO:0045047                                                       |                     | 6.02164137774053e-17                                           | 92.1619883040936    |         |          | 0.212718842986645 |           |        |       |
| 11                                                               | 106                 | protein targeting to ER                                        |                     |         |          |                   |           |        |       |
| GO:0072599                                                       |                     | 6.02164137774053e-17                                           | 92.1619883040936    |         |          | 0.212718842986645 |           |        |       |
| 11                                                               | 106                 | establishment of protein localization to endoplasmic reticulum |                     |         |          |                   |           |        |       |
| GO:0019058                                                       |                     | 1.71709935812202e-16                                           | 52.9392201834862    |         |          | 0.463566535187876 |           |        |       |



Stable4\_20PerPair

|            |     |                                                                                      |                  |                     |                    |    |
|------------|-----|--------------------------------------------------------------------------------------|------------------|---------------------|--------------------|----|
| 13         | 231 | viral infectious cycle                                                               |                  |                     |                    |    |
| GO:0000184 |     | 2.2498105684425e-16                                                                  | 80.9948559670782 |                     | 0.238807002975573  |    |
| 11         | 119 | nuclear-transcribed mRNA catabolic process, nonsense-mediated decay                  |                  |                     |                    |    |
| GO:0022415 |     | 8.05900844682899e-16                                                                 | 46.6282894736842 |                     | 0.521763199778562  |    |
| 13         | 260 | viral reproductive process                                                           |                  |                     |                    |    |
| GO:0072594 |     | 1.90328976671369e-15                                                                 | 52.3161764705882 |                     | 0.40938343367241   |    |
| 12         | 204 | establishment of protein localization to organelle                                   |                  |                     |                    |    |
| GO:0006413 |     | 3.55563203017854e-15                                                                 | 61.8955870764381 |                     | 0.305030793716698  |    |
| 11         | 152 | translational initiation                                                             |                  |                     |                    |    |
| GO:0006612 |     | 3.82665601067179e-15                                                                 | 61.4553990610329 |                     | 0.307037575254308  |    |
| 11         | 153 | protein targeting to membrane                                                        |                  |                     |                    |    |
| GO:0043624 |     | 3.82665601067179e-15                                                                 | 61.4553990610329 |                     | 0.307037575254308  |    |
| 11         | 153 | cellular protein complex disassembly                                                 |                  |                     |                    |    |
| GO:0043241 |     | 5.48420494375765e-15                                                                 | 59.3442932728647 |                     | 0.317071482942357  |    |
| 11         | 158 | protein complex disassembly                                                          |                  |                     |                    |    |
| GO:0000956 |     | 1.16255646827721e-14                                                                 | 55.1701828410689 |                     | 0.339146079856065  |    |
| 11         | 169 | nuclear-transcribed mRNA catabolic process                                           |                  |                     |                    |    |
| GO:0034623 |     | 1.60854144364843e-14                                                                 | 53.459100204499  | 0.349179987544115   |                    | 11 |
| 174        |     | cellular macromolecular complex disassembly                                          |                  |                     |                    |    |
| GO:0006402 |     | 2.0711872234438e-14                                                                  | 52.164005322688  | 0.357207113694554   |                    | 11 |
| 178        |     | mRNA catabolic process                                                               |                  |                     |                    |    |
| GO:0032984 |     | 2.20425535631333e-14                                                                 | 51.8498677248677 |                     | 0.359213895232164  |    |
| 11         | 179 | macromolecular complex disassembly                                                   |                  |                     |                    |    |
| GO:0033365 |     | 6.62768263607272e-14                                                                 | 28.3924473493101 |                     | 0.949207667289461  |    |
| 14         | 473 | protein localization to organelle                                                    |                  |                     |                    |    |
| GO:0006401 |     | 9.9014971193746e-14                                                                  | 44.8190148911798 |                     | 0.41139021521002   |    |
| 11         | 205 | RNA catabolic process                                                                |                  |                     |                    |    |
| GO:0016032 |     | 9.66873001902579e-13                                                                 | 25.9406392694064 |                     | 0.905058473462044  |    |
| 13         | 451 | viral reproduction                                                                   |                  |                     |                    |    |
| GO:0006605 |     | 1.81693803399836e-12                                                                 | 24.6058839479393 |                     | 0.951214448827071  |    |
| 13         | 474 | protein targeting                                                                    |                  |                     |                    |    |
| GO:0071845 |     | 3.5201848940134e-12                                                                  | 31.6725681725682 |                     | 0.569925956681198  |    |
| 11         | 284 | cellular component disassembly at cellular level                                     |                  |                     |                    |    |
| GO:0022411 |     | 4.09790316936296e-12                                                                 | 31.2063778580024 |                     | 0.577953082831638  |    |
| 11         | 288 | cellular component disassembly                                                       |                  |                     |                    |    |
| GO:0006364 |     | 1.81397986870106e-06                                                                 | 30.1409932659933 |                     | 0.208705279911425  |    |
| 5          | 104 | rRNA processing                                                                      |                  |                     |                    |    |
| GO:0016072 |     | 2.39417513374434e-06                                                                 | 28.406746031746  | 0.220745969137084   |                    | 5  |
| 110        |     | rRNA metabolic process                                                               |                  |                     |                    |    |
| GO:0022613 |     | 4.69180297661919e-06                                                                 | 16.9184038117927 |                     | 0.451525845962217  |    |
| 6          | 225 | ribonucleoprotein complex biogenesis                                                 |                  |                     |                    |    |
| GO:0071843 |     | 6.63733170336328e-06                                                                 | 15.8861727934316 |                     | 0.479620787488755  |    |
| 6          | 239 | cellular component biogenesis at cellular level                                      |                  |                     |                    |    |
| GO:0042254 |     | 1.05971600280302e-05                                                                 | 20.6568287037037 |                     | 0.299010449103868  |    |
| 5          | 149 | ribosome biogenesis                                                                  |                  |                     |                    |    |
| GO:0034470 |     | 4.37716726698017e-05                                                                 | 15.1997863247863 |                     | 0.401356307521971  |    |
| 5          | 200 | ncRNA processing                                                                     |                  |                     |                    |    |
| GO:0034660 |     | 0.000231990509370735                                                                 | 10.5223214285714 |                     | 0.571932738218808  |    |
| 5          | 285 | ncRNA metabolic process                                                              |                  |                     |                    |    |
| GO:0042273 |     | 0.000253467985720606                                                                 | 106.755555555556 |                     | 0.0240813784513182 |    |
| 2          | 12  | ribosomal large subunit biogenesis                                                   |                  |                     |                    |    |
| GO:0042274 |     | 0.000583212288892517                                                                 | 66.6944444444444 |                     | 0.0361220676769774 |    |
| 2          | 18  | ribosomal small subunit biogenesis                                                   |                  |                     |                    |    |
| GO:0007220 |     | 0.00072245030302257                                                                  | 59.2757201646091 |                     | 0.0401356307521971 |    |
| 2          | 20  | Notch receptor processing                                                            |                  |                     |                    |    |
| GO:0035872 |     | 0.00414243345232755                                                                  | 23.1497584541063 |                     | 0.096325513805273  |    |
| 2          | 48  | nucleotide-binding domain, leucine rich repeat containing receptor signaling pathway |                  |                     |                    |    |
| GO:0050434 |     | 0.0054063355297355                                                                   | 20.0824598183089 |                     | 0.110372984568542  |    |
| 2          | 55  | positive regulation of viral transcription                                           |                  |                     |                    |    |
| GO:0016056 |     | 0.00600868615951344                                                                  | 257.5            | 0.00602034461282956 | 1                  | 3  |
|            |     | rhodopsin mediated signaling pathway                                                 |                  |                     |                    |    |
| GO:0046782 |     | 0.00793065877349068                                                                  | 16.3612535612536 |                     | 0.13445436301986   |    |

STable4\_20PerPair

|                                                               |        |                                                    |                  |                   |        |                                                   |       |         |                     |
|---------------------------------------------------------------|--------|----------------------------------------------------|------------------|-------------------|--------|---------------------------------------------------|-------|---------|---------------------|
| 2                                                             | 67     | regulation of viral transcription                  |                  |                   |        |                                                   |       |         |                     |
| GO:0008300                                                    |        | 0.00800382376342956                                | 171.654761904762 |                   |        |                                                   |       |         | 0.00802712615043942 |
| 1                                                             | 4      | isoprenoid catabolic process                       |                  |                   |        |                                                   |       |         |                     |
| GO:0048524                                                    |        | 0.00985562566301913                                | 14.5601217656012 |                   |        |                                                   |       |         | 0.150508615320739   |
| 2                                                             | 75     | positive regulation of viral reproduction          |                  |                   |        |                                                   |       |         |                     |
| GO:0046826                                                    |        | 0.00999509455396486                                | 128.732142857143 |                   |        |                                                   |       |         | 0.0100339076880493  |
| 1                                                             | 5      | negative regulation of protein export from nucleus |                  |                   |        |                                                   |       |         |                     |
| Tissue: whole_Blood=>Skin_Sun_Exposed_Lower_leg Type: cluster |        |                                                    |                  |                   |        |                                                   |       |         |                     |
| SourceGene: CLNK(ENSG00000109684.9)                           |        |                                                    |                  |                   |        |                                                   |       |         |                     |
| TargetGeneSet:                                                |        |                                                    |                  |                   |        |                                                   |       |         |                     |
| STEAP3                                                        | RP11   | PADI1                                              | CDC20            | KIF2C             | PSRC1  | CENPF                                             | EXO1  | ODC1    | BUB1                |
| GRIK2                                                         | LDHAP4 | SIAH2                                              | ECT2             | TACC3             | FAM50B | PSORS1C1                                          |       | CSNK2B  | GPSM3               |
| FZD10                                                         | BUB1B  | PTGS1                                              | CDK1             | KIF20B            | MKI67  | HBD                                               | E2F8  | SLC36A4 | CDCA3               |
| TOP2A                                                         | KIF18B | PLCB2                                              | CASC5            | KIF23             | CCNF   | VWA3A                                             | ORC6  | SPAG5   | SYNRG               |
| KIF4A                                                         |        | USP32                                              | NDC80            | MAN2B1            | UBE2S  | TPX2                                              | NTSR1 | GTSE1   | RP3                 |
| GOBPID                                                        | Pvalue | OddsRatio                                          | ExpCount         | Count             | Size   | Term                                              |       |         |                     |
| GO:0051301                                                    |        | 1.21075483065493e-17                               | 24.5271131639723 |                   |        | cell division                                     |       |         | 1.37623693862016    |
| 19                                                            | 452    |                                                    |                  |                   |        |                                                   |       |         |                     |
| GO:0000087                                                    |        | 1.40197949215378e-16                               | 25.8166504697117 |                   |        | M phase of mitotic cell cycle                     |       |         | 1.09611791571518    |
| 17                                                            | 360    |                                                    |                  |                   |        |                                                   |       |         |                     |
| GO:0000280                                                    |        | 2.24557936903206e-15                               | 24.0769888793841 |                   |        | nuclear division                                  |       |         | 1.0656701958342 16  |
| 350                                                           |        |                                                    |                  |                   |        |                                                   |       |         |                     |
| GO:0007067                                                    |        | 2.24557936903206e-15                               | 24.0769888793841 |                   |        | mitosis                                           |       |         | 1.0656701958342 16  |
| 350                                                           |        |                                                    |                  |                   |        |                                                   |       |         |                     |
| GO:0048285                                                    |        | 5.3648323216949e-15                                | 22.6844229217111 |                   |        | organelle fission                                 |       |         | 1.12656563559615    |
| 16                                                            | 370    |                                                    |                  |                   |        |                                                   |       |         |                     |
| GO:0007017                                                    |        | 1.37540521879979e-14                               | 21.2656309208033 |                   |        | microtubule-based process                         |       |         | 1.1965953913224 16  |
| 393                                                           |        |                                                    |                  |                   |        |                                                   |       |         |                     |
| GO:0010564                                                    |        | 6.01653234092679e-13                               | 18.1591910811512 |                   |        | regulation of cell cycle process                  |       |         | 1.26053560307245    |
| 15                                                            | 414    |                                                    |                  |                   |        |                                                   |       |         |                     |
| GO:0000226                                                    |        | 1.68316174189478e-11                               | 20.6468871595331 |                   |        | microtubule cytoskeleton organization             |       |         | 0.819043664798284   |
| 12                                                            | 269    |                                                    |                  |                   |        |                                                   |       |         |                     |
| GO:0007059                                                    |        | 3.08458184360342e-10                               | 28.0226826608506 |                   |        | chromosome segregation                            |       |         | 0.426268078333679   |
| 9                                                             | 140    |                                                    |                  |                   |        |                                                   |       |         |                     |
| GO:0007051                                                    |        | 3.96260831573879e-09                               | 37.1484635320252 |                   |        | spindle organization                              |       |         | 0.243581759047817   |
| 7                                                             | 80     |                                                    |                  |                   |        |                                                   |       |         |                     |
| GO:0000236                                                    |        | 6.08811110417298e-09                               | 34.7550242550243 |                   |        | mitotic prometaphase                              |       |         | 0.258805618988305   |
| 7                                                             | 85     |                                                    |                  |                   |        |                                                   |       |         |                     |
| GO:0007346                                                    |        | 1.869974447837e-08                                 | 14.1678377835776 |                   |        | regulation of mitotic cell cycle                  |       |         | 0.922565912393606   |
| 10                                                            | 303    |                                                    |                  |                   |        |                                                   |       |         |                     |
| GO:0000075                                                    |        | 3.79823293767637e-08                               | 15.6426732066217 |                   |        | cell cycle checkpoint                             |       |         | 0.736834821119646   |
| 9                                                             | 242    |                                                    |                  |                   |        |                                                   |       |         |                     |
| GO:0071173                                                    |        | 5.39393193852549e-08                               | 63.5632183908046 |                   |        | spindle assembly checkpoint                       |       |         | 0.103522247595322   |
| 5                                                             | 34     |                                                    |                  |                   |        |                                                   |       |         |                     |
| GO:0033043                                                    |        | 5.83467262148604e-08                               | 10.8348837209302 |                   |        | regulation of organelle organization              |       |         | 1.342744444675109   |
| 11                                                            | 441    |                                                    |                  |                   |        |                                                   |       |         |                     |
| GO:0071156                                                    |        | 8.01901196423996e-08                               | 14.2709243697479 |                   |        | regulation of cell cycle arrest                   |       |         | 0.803819804857795   |
| 9                                                             | 264    |                                                    |                  |                   |        |                                                   |       |         |                     |
| GO:0007050                                                    |        | 1.19431519081556e-07                               | 11.5090938882517 |                   |        | cell cycle arrest                                 |       |         | 1.12352086360805    |
| 10                                                            | 369    |                                                    |                  |                   |        |                                                   |       |         |                     |
| GO:0031577                                                    |        | 1.61956069275609e-07                               | 49.7920997920998 |                   |        | spindle checkpoint                                |       |         | 0.127880423500104   |
| 5                                                             | 42     |                                                    |                  |                   |        |                                                   |       |         |                     |
| GO:0008608                                                    |        | 1.72823685853093e-07                               | 110.723076923077 |                   |        | attachment of spindle microtubules to kinetochore |       |         | 0.0517611237976611  |
| 4                                                             | 17     |                                                    |                  |                   |        |                                                   |       |         |                     |
| GO:0007093                                                    |        | 1.86368464392659e-07                               | 20.4596642096642 |                   |        | mitotic cell cycle checkpoint                     |       |         | 0.423223306345582   |
| 7                                                             | 139    |                                                    |                  |                   |        |                                                   |       |         |                     |
| GO:0051313                                                    |        | 2.80210845088583e-07                               | 95.9466666666667 |                   |        | attachment of spindle microtubules to chromosome  |       |         | 0.0578506677738565  |
| 4                                                             | 19     |                                                    |                  |                   |        |                                                   |       |         |                     |
| GO:0032886                                                    |        | 3.07331770700919e-07                               | 26.6043343653251 |                   |        | regulation of microtubule-based process           |       |         | 0.277074250916892   |
| 6                                                             | 91     |                                                    |                  |                   |        |                                                   |       |         |                     |
| GO:0045786                                                    |        | 5.69710459173975e-07                               | 9.62942554070809 |                   |        | negative regulation of cell cycle                 |       |         | 1.3305653587987 10  |
| 437                                                           |        |                                                    |                  |                   |        |                                                   |       |         |                     |
| GO:0051983                                                    |        | 7.59729081247084e-07                               | 71.935           | 0.073074527714345 |        |                                                   |       | 4       | 24                  |

Stable4\_20PerPair

|                                      |                                                                                                |                  |                    |   |
|--------------------------------------|------------------------------------------------------------------------------------------------|------------------|--------------------|---|
| regulation of chromosome segregation |                                                                                                |                  |                    |   |
| GO:0007052                           | 2.86790487866996e-06                                                                           | 49.5793103448276 | 0.100477475607224  |   |
| 4 33                                 | mitotic spindle organization                                                                   |                  |                    |   |
| GO:0007094                           | 2.86790487866996e-06                                                                           | 49.5793103448276 | 0.100477475607224  |   |
| 4 33                                 | mitotic cell cycle spindle assembly checkpoint                                                 |                  |                    |   |
| GO:0070507                           | 3.25815398589644e-06                                                                           | 25.8866016612495 | 0.231402671095426  |   |
| 5 76                                 | regulation of microtubule cytoskeleton organization                                            |                  |                    |   |
| GO:0034453                           | 3.65346320691979e-06                                                                           | 46.3741935483871 | 0.10656701958342   |   |
| 4 35                                 | microtubule anchoring                                                                          |                  |                    |   |
| GO:0045841                           | 3.65346320691979e-06                                                                           | 46.3741935483871 | 0.10656701958342   |   |
| 4 35                                 | negative regulation of mitotic metaphase/anaphase transition                                   |                  |                    |   |
| GO:0071174                           | 4.10105227245656e-06                                                                           | 44.921875        | 0.109611791571518  | 4 |
| 36                                   | mitotic cell cycle spindle checkpoint                                                          |                  |                    |   |
| GO:0045839                           | 6.30658648157389e-06                                                                           | 39.9194444444444 | 0.121790879523908  |   |
| 4 40                                 | negative regulation of mitosis                                                                 |                  |                    |   |
| GO:0051784                           | 6.30658648157389e-06                                                                           | 39.9194444444444 | 0.121790879523908  |   |
| 4 40                                 | negative regulation of nuclear division                                                        |                  |                    |   |
| GO:0007088                           | 6.72475418879287e-06                                                                           | 22.1254247760272 | 0.267939934952598  |   |
| 5 88                                 | regulation of mitosis                                                                          |                  |                    |   |
| GO:0051783                           | 6.72475418879287e-06                                                                           | 22.1254247760272 | 0.267939934952598  |   |
| 5 88                                 | regulation of nuclear division                                                                 |                  |                    |   |
| GO:0030071                           | 8.45981383992258e-06                                                                           | 36.8410256410256 | 0.130925195488202  |   |
| 4 43                                 | regulation of mitotic metaphase/anaphase transition                                            |                  |                    |   |
| GO:0032507                           | 9.79035488740564e-06                                                                           | 20.3945868945869 | 0.289253338869282  |   |
| 5 95                                 | maintenance of protein location in cell                                                        |                  |                    |   |
| GO:0007091                           | 1.01685457206719e-05                                                                           | 35.0390243902439 | 0.137014739464397  |   |
| 4 45                                 | mitotic metaphase/anaphase transition                                                          |                  |                    |   |
| GO:0051651                           | 1.74845489906267e-05                                                                           | 17.9801407742584 | 0.325790602726455  |   |
| 5 107                                | maintenance of location in cell                                                                |                  |                    |   |
| GO:0000819                           | 1.81921946525286e-05                                                                           | 29.9145833333333 | 0.158328143381081  |   |
| 4 52                                 | sister chromatid segregation                                                                   |                  |                    |   |
| GO:0045185                           | 1.91284276287608e-05                                                                           | 17.6319033530572 | 0.33188014670265   |   |
| 5 109                                | maintenance of protein location                                                                |                  |                    |   |
| GO:0007018                           | 6.8113014651684e-05                                                                            | 13.3539210181546 | 0.432357622309875  |   |
| 5 142                                | microtubule-based movement                                                                     |                  |                    |   |
| GO:0060236                           | 9.0080051161491e-05                                                                            | 228.634920634921 | 0.0152238599404885 |   |
| 2 5                                  | regulation of mitotic spindle organization                                                     |                  |                    |   |
| GO:0051493                           | 9.82844315264563e-05                                                                           | 9.24206176598521 | 0.755103453048232  |   |
| 6 248                                | regulation of cytoskeleton organization                                                        |                  |                    |   |
| GO:0010389                           | 0.000100957416931335                                                                           | 38.970189701897  | 0.0913431596429313 | 3 |
| 30                                   | regulation of G2/M transition of mitotic cell cycle                                            |                  |                    |   |
| GO:0006511                           | 0.00010421123777288                                                                            | 7.44568097509274 | 1.10829700366757   |   |
| 7 364                                | ubiquitin-dependent protein catabolic process                                                  |                  |                    |   |
| GO:0010639                           | 0.000109550369726576                                                                           | 12.0234480431849 | 0.47802920213134   |   |
| 5 157                                | negative regulation of organelle organization                                                  |                  |                    |   |
| GO:0031145                           | 0.000115299689295311                                                                           | 18.1367088607595 | 0.25271607501211   |   |
| 4 83                                 | anaphase-promoting complex-dependent proteasomal ubiquitin-dependent protein catabolic process |                  |                    |   |
| GO:0019941                           | 0.00011733408102932                                                                            | 7.29885654885655 | 1.12961040758425   |   |
| 7 371                                | modification-dependent protein catabolic process                                               |                  |                    |   |
| GO:0043632                           | 0.000123355982829683                                                                           | 7.23764636571176 | 1.13874472354854   |   |
| 7 374                                | modification-dependent macromolecule catabolic process                                         |                  |                    |   |
| GO:0034501                           | 0.000134858384279777                                                                           | 171.464285714286 | 0.0182686319285863 |   |
| 2 6                                  | protein localization to kinetochore                                                            |                  |                    |   |
| GO:0051603                           | 0.000157368710410237                                                                           | 6.9460166973256  | 1.18441630337001   | 7 |
| 389                                  | proteolysis involved in cellular protein catabolic process                                     |                  |                    |   |
| GO:0051235                           | 0.000163579020883428                                                                           | 10.998609823911  | 0.520656009964708  | 5 |
| 171                                  | maintenance of location                                                                        |                  |                    |   |
| GO:0051488                           | 0.000188436148093084                                                                           | 137.161904761905 | 0.021313403916684  |   |
| 2 7                                  | activation of anaphase-promoting complex activity                                              |                  |                    |   |
| GO:0090224                           | 0.000188436148093084                                                                           | 137.161904761905 | 0.021313403916684  |   |
| 2 7                                  | regulation of spindle organization                                                             |                  |                    |   |
| GO:0044257                           | 0.000192682918905938                                                                           | 6.71118713650359 | 1.22399833921528   |   |

Stable4\_20PerPair

|            |                      |                                                                 |                     |
|------------|----------------------|-----------------------------------------------------------------|---------------------|
| 7          | 402                  | cellular protein catabolic process                              |                     |
| GO:0010948 | 0.000202529156755743 | 15.5597826086957                                                | 0.29229811085738    |
| 4          | 96                   | negative regulation of cell cycle process                       |                     |
| GO:0051438 | 0.000202529156755743 | 15.5597826086957                                                | 0.29229811085738    |
| 4          | 96                   | regulation of ubiquitin-protein ligase activity                 |                     |
| GO:0051340 | 0.000236960782968079 | 14.9072916666667                                                | 0.304477198809771   |
| 4          | 100                  | regulation of ligase activity                                   |                     |
| GO:0051988 | 0.000250761781355739 | 114.293650793651                                                | 0.0243581759047817  |
| 2          | 8                    | regulation of attachment of spindle microtubules to kinetochore |                     |
| GO:0043161 | 0.000414060716645826 | 8.92596782302665                                                | 0.636357345512421   |
| 5          | 209                  | proteasomal ubiquitin-dependent protein catabolic process       |                     |
| GO:0000070 | 0.000440019098798648 | 22.8435843054083                                                | 0.149193827416788   |
| 3          | 49                   | mitotic sister chromatid segregation                            |                     |
| GO:0010498 | 0.000481338980778608 | 8.62559241706161                                                | 0.657670749429105   |
| 5          | 216                  | proteasomal protein catabolic process                           |                     |
| GO:0000085 | 0.000489713582063037 | 76.1798941798942                                                | 0.0334924918690748  |
| 2          | 11                   | G2 phase of mitotic cell cycle                                  |                     |
| GO:0051319 | 0.000489713582063037 | 76.1798941798942                                                | 0.0334924918690748  |
| 2          | 11                   | G2 phase                                                        |                     |
| GO:0071780 | 0.000489713582063037 | 76.1798941798942                                                | 0.0334924918690748  |
| 2          | 11                   | mitotic cell cycle G2/M transition checkpoint                   |                     |
| GO:0048015 | 0.000571105863466488 | 11.7090163934426                                                | 0.383641270500311   |
| 4          | 126                  | phosphatidylinositol-mediated signaling                         |                     |
| GO:0048017 | 0.000571105863466488 | 11.7090163934426                                                | 0.383641270500311   |
| 4          | 126                  | inositol lipid-mediated signaling                               |                     |
| GO:0030163 | 0.00067657689176099  | 5.39615640230394                                                | 1.50716213410837    |
| 7          | 495                  | protein catabolic process                                       |                     |
| GO:0071775 | 0.000691818707593643 | 62.3203463203463                                                | 0.0395820358452702  |
| 2          | 13                   | regulation of cell cycle cytokinesis                            |                     |
| GO:0071777 | 0.000691818707593643 | 62.3203463203463                                                | 0.0395820358452702  |
| 2          | 13                   | positive regulation of cell cycle cytokinesis                   |                     |
| GO:0032467 | 0.00092769643147102  | 52.7252747252747                                                | 0.0456715798214656  |
| 2          | 15                   | positive regulation of cytokinesis                              |                     |
| GO:2000602 | 0.00101716443896408  | 9.97482517482517                                                | 0.447581482250363   |
| 4          | 147                  | regulation of interphase of mitotic cell cycle                  |                     |
| GO:0051640 | 0.00109641375977974  | 9.76780821917808                                                | 0.456715798214656   |
| 4          | 150                  | organelle localization                                          |                     |
| GO:0051310 | 0.0011969473098622   | 45.6888888888889                                                | 0.0517611237976611  |
| 2          | 17                   | metaphase plate congression                                     |                     |
| GO:0031396 | 0.00166536096463478  | 8.68475609756098                                                | 0.511521694000415   |
| 4          | 168                  | regulation of protein ubiquitination                            |                     |
| GO:0051439 | 0.00170862344283546  | 13.9824390243902                                                | 0.237492215071621   |
| 3          | 78                   | regulation of ubiquitin-protein ligase activity                 | involved in mitotic |
| cell cycle |                      |                                                                 |                     |
| GO:0043623 | 0.00171933122862262  | 6.42162211311148                                                | 0.873849560584043   |
| 5          | 287                  | cellular protein complex assembly                               |                     |
| GO:0050000 | 0.00183398782323813  | 36.0601503759398                                                | 0.0639402117500519  |
| 2          | 21                   | chromosome localization                                         |                     |
| GO:0051303 | 0.00183398782323813  | 36.0601503759398                                                | 0.0639402117500519  |
| 2          | 21                   | establishment of chromosome localization                        |                     |
| GO:0051302 | 0.00197224465543193  | 13.2707625810435                                                | 0.249671303024012   |
| 3          | 82                   | regulation of cell division                                     |                     |
| GO:0051443 | 0.00197224465543193  | 13.2707625810435                                                | 0.249671303024012   |
| 3          | 82                   | positive regulation of ubiquitin-protein ligase activity        |                     |
| GO:0051129 | 0.00202708400405556  | 6.17572416207229                                                | 0.907342052453117   |
| 5          | 298                  | negative regulation of cellular component organization          |                     |
| GO:0034502 | 0.00220099556319947  | 32.6213151927438                                                | 0.0700297557262473  |
| 2          | 23                   | protein localization to chromosome                              |                     |
| GO:0051351 | 0.00225992739481469  | 12.6276814575375                                                | 0.261850390976403   |
| 3          | 86                   | positive regulation of ligase activity                          |                     |
| GO:0032465 | 0.00259981261753148  | 29.7805383022774                                                | 0.0761192997024427  |
| 2          | 25                   | regulation of cytokinesis                                       |                     |
| GO:0032855 | 0.00259981261753148  | 29.7805383022774                                                | 0.0761192997024427  |

Stable4\_20PerPair

|            |     |                                                                         |                  |                     |  |  |   |                    |   |
|------------|-----|-------------------------------------------------------------------------|------------------|---------------------|--|--|---|--------------------|---|
| 2          | 25  | positive regulation of Rac GTPase activity                              |                  |                     |  |  |   |                    |   |
| GO:0033205 |     | 0.00349134755729705                                                     | 25.3615520282187 |                     |  |  |   | 0.0882983876548336 |   |
| 2          | 29  | cell cycle cytokinesis                                                  |                  |                     |  |  |   |                    |   |
| GO:0051656 |     | 0.00356524281848327                                                     | 10.6836734693878 |                     |  |  |   | 0.307521970797869  |   |
| 3          | 101 | establishment of organelle localization                                 |                  |                     |  |  |   |                    |   |
| GO:0030261 |     | 0.00373351828160888                                                     | 24.4540816326531 |                     |  |  |   | 0.0913431596429313 |   |
| 2          | 30  | chromosome condensation                                                 |                  |                     |  |  |   |                    |   |
| GO:0042306 |     | 0.00525349251927208                                                     | 9.25577379667602 |                     |  |  |   | 0.353193550619334  |   |
| 3          | 116 | regulation of protein import into nucleus                               |                  |                     |  |  |   |                    |   |
| GO:1900180 |     | 0.00525349251927208                                                     | 9.25577379667602 |                     |  |  |   | 0.353193550619334  |   |
| 3          | 116 | regulation of protein localization to nucleus                           |                  |                     |  |  |   |                    |   |
| GO:0051329 |     | 0.00566545348042037                                                     | 4.81043466337584 |                     |  |  |   | 1.15396858348903   |   |
| 5          | 379 | interphase of mitotic cell cycle                                        |                  |                     |  |  |   |                    |   |
| GO:0051325 |     | 0.00618084301721672                                                     | 4.70700765203383 |                     |  |  |   | 1.17832675939381   |   |
| 5          | 387 | interphase                                                              |                  |                     |  |  |   |                    |   |
| GO:0031576 |     | 0.00656677947216334                                                     | 18.0062656641604 |                     |  |  |   | 0.121790879523908  |   |
| 2          | 40  | G2/M transition checkpoint                                              |                  |                     |  |  |   |                    |   |
| GO:0031398 |     | 0.00675157317073719                                                     | 8.42820613690008 |                     |  |  |   | 0.386686042488409  |   |
| 3          | 127 | positive regulation of protein ubiquitination                           |                  |                     |  |  |   |                    |   |
| GO:0007098 |     | 0.00689025778493647                                                     | 17.5433455433455 |                     |  |  |   | 0.124835651512006  |   |
| 2          | 41  | centrosome cycle                                                        |                  |                     |  |  |   |                    |   |
| GO:0070301 |     | 0.00755853177685014                                                     | 16.68524970964   | 0.130925195488202   |  |  |   |                    | 2 |
| 43         |     | cellular response to hydrogen peroxide                                  |                  |                     |  |  |   |                    |   |
| GO:0046822 |     | 0.00831327291252606                                                     | 7.79377502730251 |                     |  |  |   | 0.417133762369386  |   |
| 3          | 137 | regulation of nucleocytoplasmic transport                               |                  |                     |  |  |   |                    |   |
| GO:0031109 |     | 0.00861357420988902                                                     | 15.5443722943723 |                     |  |  |   | 0.140059511452495  |   |
| 2          | 46  | microtubule polymerization or depolymerization                          |                  |                     |  |  |   |                    |   |
| GO:0006260 |     | 0.0087746421073058                                                      | 5.35719696969697 |                     |  |  |   | 0.815998892810186  |   |
| 4          | 268 | DNA replication                                                         |                  |                     |  |  |   |                    |   |
| GO:0033157 |     | 0.0088198247624466                                                      | 7.62150614206872 |                     |  |  |   | 0.426268078333679  |   |
| 3          | 140 | regulation of intracellular protein transport                           |                  |                     |  |  |   |                    |   |
| GO:0010826 |     | 0.00910716059984296                                                     | 167.5            | 0.00913431596429313 |  |  | 1 |                    | 3 |
|            |     | negative regulation of centrosome duplication                           |                  |                     |  |  |   |                    |   |
| GO:0014038 |     | 0.00910716059984296                                                     | 167.5            | 0.00913431596429313 |  |  | 1 |                    | 3 |
|            |     | regulation of Schwann cell differentiation                              |                  |                     |  |  |   |                    |   |
| GO:0015808 |     | 0.00910716059984296                                                     | 167.5            | 0.00913431596429313 |  |  | 1 |                    | 3 |
|            |     | L-alanine transport                                                     |                  |                     |  |  |   |                    |   |
| GO:0030263 |     | 0.00910716059984296                                                     | 167.5            | 0.00913431596429313 |  |  | 1 |                    | 3 |
|            |     | apoptotic chromosome condensation                                       |                  |                     |  |  |   |                    |   |
| GO:0030951 |     | 0.00910716059984296                                                     | 167.5            | 0.00913431596429313 |  |  | 1 |                    | 3 |
|            |     | establishment or maintenance of microtubule cytoskeleton polarity       |                  |                     |  |  |   |                    |   |
| GO:0030953 |     | 0.00910716059984296                                                     | 167.5            | 0.00913431596429313 |  |  | 1 |                    | 3 |
|            |     | astral microtubule organization                                         |                  |                     |  |  |   |                    |   |
| GO:0033211 |     | 0.00910716059984296                                                     | 167.5            | 0.00913431596429313 |  |  | 1 |                    | 3 |
|            |     | adiponectin-mediated signaling pathway                                  |                  |                     |  |  |   |                    |   |
| GO:0038030 |     | 0.00910716059984296                                                     | 167.5            | 0.00913431596429313 |  |  | 1 |                    | 3 |
|            |     | non-canonical wnt receptor signaling pathway via MAPK cascade           |                  |                     |  |  |   |                    |   |
| GO:0000086 |     | 0.00952295802356474                                                     | 7.40321743642968 |                     |  |  |   | 0.43844716628607   |   |
| 3          | 144 | G2/M transition of mitotic cell cycle                                   |                  |                     |  |  |   |                    |   |
|            |     | Tissue: Skin_Sun_Exposed_Lower_leg=>Whole_Blood Type: asymmetric        |                  |                     |  |  |   |                    |   |
|            |     | SourceGene: CTD-2561B21.10(ENSG00000262098.1)                           |                  |                     |  |  |   |                    |   |
|            |     | TargetGeneSet: CYP4A22 HAO2 APCS APOA2 SERPINC1 AGXT UGT2B10 RP13       |                  |                     |  |  |   |                    |   |
|            |     | HOXA11 PON1 AMBP ITIH2 FRAT1 GLYATL1 RP11 APOC3 APOA1 MED6              |                  |                     |  |  |   |                    |   |
|            |     | RAB8A                                                                   |                  |                     |  |  |   |                    |   |
|            |     | GOBPID Pvalue OddsRatio ExpCount Count Size Term                        |                  |                     |  |  |   |                    |   |
|            |     | GO:0010903 1.3522488597058e-09 Inf 0.00352916753165871 3 3              |                  |                     |  |  |   |                    |   |
|            |     | negative regulation of very-low-density lipoprotein particle remodeling |                  |                     |  |  |   |                    |   |
|            |     | GO:0010901 1.35028408915895e-08 1546.28571428571 0.00588194588609785    |                  |                     |  |  |   |                    |   |
|            |     | 3 5 regulation of very-low-density lipoprotein particle remodeling      |                  |                     |  |  |   |                    |   |
|            |     | GO:0035376 2.69860552913237e-08 1030.78571428571 0.00705833506331742    |                  |                     |  |  |   |                    |   |
|            |     | 3 6 sterol import                                                       |                  |                     |  |  |   |                    |   |
|            |     | GO:0035382 2.69860552913237e-08 1030.78571428571 0.00705833506331742    |                  |                     |  |  |   |                    |   |
|            |     | 3 6 sterol transmembrane transport                                      |                  |                     |  |  |   |                    |   |

Stable4\_20PerPair

|            |                                                                         |                  |                     |   |    |
|------------|-------------------------------------------------------------------------|------------------|---------------------|---|----|
| GO:0070508 | 2.69860552913237e-08                                                    | 1030.78571428571 | 0.00705833506331742 |   |    |
| 3          | cholesterol import                                                      |                  |                     |   |    |
| GO:0032371 | 4.61781324607167e-08                                                    | 158.307692307692 | 0.0376444536710262  |   |    |
| 4          | 32 regulation of sterol transport                                       |                  |                     |   |    |
| GO:0032374 | 4.61781324607167e-08                                                    | 158.307692307692 | 0.0376444536710262  |   |    |
| 4          | 32 regulation of cholesterol transport                                  |                  |                     |   |    |
| GO:0033344 | 7.54252620415058e-08                                                    | 138.480769230769 | 0.0423500103799045  |   |    |
| 4          | 36 cholesterol efflux                                                   |                  |                     |   |    |
| GO:0034384 | 1.13094494321647e-07                                                    | 515.285714285714 | 0.0105875025949761  |   |    |
| 3          | 9 high-density lipoprotein particle clearance                           |                  |                     |   |    |
| GO:0033700 | 1.61446143118067e-07                                                    | 441.642857142857 | 0.0117638917721957  |   |    |
| 3          | 10 phospholipid efflux                                                  |                  |                     |   |    |
| GO:0034370 | 2.21827110259013e-07                                                    | 386.410714285714 | 0.0129402809494153  |   |    |
| 3          | 11 triglyceride-rich lipoprotein particle remodeling                    |                  |                     |   |    |
| GO:0034372 | 2.21827110259013e-07                                                    | 386.410714285714 | 0.0129402809494153  |   |    |
| 3          | 11 very-low-density lipoprotein particle remodeling                     |                  |                     |   |    |
| GO:0034377 | 3.83941628398622e-07                                                    | 309.085714285714 | 0.0152930593038544  |   |    |
| 3          | 13 plasma lipoprotein particle assembly                                 |                  |                     |   |    |
| GO:0065005 | 3.83941628398622e-07                                                    | 309.085714285714 | 0.0152930593038544  |   |    |
| 3          | 13 protein-lipid complex assembly                                       |                  |                     |   |    |
| GO:0032368 | 4.30764736795057e-07                                                    | 86.7752639517345 | 0.0647014047470763  |   |    |
| 4          | 55 regulation of lipid transport                                        |                  |                     |   |    |
| GO:0034375 | 4.88297831702514e-07                                                    | 280.967532467532 | 0.016469448481074   |   |    |
| 3          | 14 high-density lipoprotein particle remodeling                         |                  |                     |   |    |
| GO:0015918 | 6.56275688479771e-07                                                    | 77.608636977058  | 0.0717597398103937  | 4 |    |
| 61         | sterol transport                                                        |                  |                     |   |    |
| GO:0030301 | 6.56275688479771e-07                                                    | 77.608636977058  | 0.0717597398103937  | 4 |    |
| 61         | cholesterol transport                                                   |                  |                     |   |    |
| GO:0043691 | 9.10217205166957e-07                                                    | 220.714285714286 | 0.0199986160127327  |   |    |
| 3          | 17 reverse cholesterol transport                                        |                  |                     |   |    |
| GO:0034367 | 2.3602611781074e-06                                                     | 154.435714285714 | 0.0270569510760501  |   |    |
| 3          | 23 macromolecular complex remodeling                                    |                  |                     |   |    |
| GO:0034368 | 2.3602611781074e-06                                                     | 154.435714285714 | 0.0270569510760501  |   |    |
| 3          | 23 protein-lipid complex remodeling                                     |                  |                     |   |    |
| GO:0034369 | 2.3602611781074e-06                                                     | 154.435714285714 | 0.0270569510760501  |   |    |
| 3          | 23 plasma lipoprotein particle remodeling                               |                  |                     |   |    |
| GO:0071825 | 3.88690786963359e-06                                                    | 128.660714285714 | 0.0317625077849284  |   |    |
| 3          | 27 protein-lipid complex subunit organization                           |                  |                     |   |    |
| GO:0071827 | 3.88690786963359e-06                                                    | 128.660714285714 | 0.0317625077849284  |   |    |
| 3          | 27 plasma lipoprotein particle organization                             |                  |                     |   |    |
| GO:0018158 | 3.9050242570584e-06                                                     | 1924.4           | 0.00352916753165871 | 2 | 3  |
|            | protein oxidation                                                       |                  |                     |   |    |
| GO:0060620 | 3.9050242570584e-06                                                     | 1924.4           | 0.00352916753165871 | 2 | 3  |
|            | regulation of cholesterol import                                        |                  |                     |   |    |
| GO:2000909 | 3.9050242570584e-06                                                     | 1924.4           | 0.00352916753165871 | 2 | 3  |
|            | regulation of sterol import                                             |                  |                     |   |    |
| GO:0051346 | 4.64937173304342e-06                                                    | 26.9204545454545 | 0.264687564874403   |   |    |
| 5          | 225 negative regulation of hydrolase activity                           |                  |                     |   |    |
| GO:0034381 | 5.38340488293117e-06                                                    | 114.34126984127  | 0.0352916753165871  | 3 |    |
| 30         | plasma lipoprotein particle clearance                                   |                  |                     |   |    |
| GO:0015914 | 5.95586594228601e-06                                                    | 110.25           | 0.0364680644938067  | 3 | 31 |
|            | phospholipid transport                                                  |                  |                     |   |    |
| GO:0046470 | 6.56721295709553e-06                                                    | 106.440886699507 | 0.0376444536710262  |   |    |
| 3          | 32 phosphatidylcholine metabolic process                                |                  |                     |   |    |
| GO:0008203 | 7.52834268934527e-06                                                    | 40.8148148148148 | 0.131755587848592   |   |    |
| 4          | 112 cholesterol metabolic process                                       |                  |                     |   |    |
| GO:0032488 | 7.80464344963398e-06                                                    | 962.133333333333 | 0.00470555670887828 |   |    |
| 2          | 4 Cdc42 protein signal transduction                                     |                  |                     |   |    |
| GO:0016125 | 9.57670561999659e-06                                                    | 38.3117056856187 | 0.139990312089129   |   |    |
| 4          | 119 sterol metabolic process                                            |                  |                     |   |    |
| GO:0002740 | 1.29987371887955e-05                                                    | 641.377777777778 | 0.00588194588609785 |   |    |
| 2          | 5 negative regulation of cytokine secretion involved in immune response |                  |                     |   |    |

Stable4\_20PerPair

|                                                 |                                                              |                  |                     |   |    |
|-------------------------------------------------|--------------------------------------------------------------|------------------|---------------------|---|----|
| GO:0030300                                      | 1.94846127555476e-05                                         | 481              | 0.00705833506331742 | 2 | 6  |
| regulation of intestinal cholesterol absorption |                                                              |                  |                     |   |    |
| GO:0034380                                      | 1.94846127555476e-05                                         | 481              | 0.00705833506331742 | 2 | 6  |
| high-density lipoprotein particle assembly      |                                                              |                  |                     |   |    |
| GO:0097006                                      | 1.98952708483494e-05                                         | 71.7159468438538 | 0.0541139021521002  |   |    |
| 3 46                                            | regulation of plasma lipoprotein particle levels             |                  |                     |   |    |
| GO:0042439                                      | 2.40943119459989e-05                                         | 67.0248447204969 | 0.0576430696837589  |   |    |
| 3 49                                            | ethanolamine-containing compound metabolic process           |                  |                     |   |    |
| GO:0002374                                      | 2.72595813477165e-05                                         | 384.773333333333 | 0.00823472424053699 |   |    |
| 2 7                                             | cytokine secretion involved in immune response               |                  |                     |   |    |
| GO:0002739                                      | 2.72595813477165e-05                                         | 384.773333333333 | 0.00823472424053699 |   |    |
| 2 7                                             | regulation of cytokine secretion involved in immune response |                  |                     |   |    |
| GO:0010873                                      | 2.72595813477165e-05                                         | 384.773333333333 | 0.00823472424053699 |   |    |
| 2 7                                             | positive regulation of cholesterol esterification            |                  |                     |   |    |
| GO:0018206                                      | 2.72595813477165e-05                                         | 384.773333333333 | 0.00823472424053699 |   |    |
| 2 7                                             | peptidyl-methionine modification                             |                  |                     |   |    |
| GO:0042632                                      | 4.00892270692846e-05                                         | 56.0220779220779 | 0.068230572278735   |   |    |
| 3 58                                            | cholesterol homeostasis                                      |                  |                     |   |    |
| GO:0055092                                      | 4.00892270692846e-05                                         | 56.0220779220779 | 0.068230572278735   |   |    |
| 3 58                                            | sterol homeostasis                                           |                  |                     |   |    |
| GO:0010872                                      | 4.66660619555133e-05                                         | 274.8            | 0.0105875025949761  | 2 | 9  |
| regulation of cholesterol esterification        |                                                              |                  |                     |   |    |
| GO:0006869                                      | 5.78309668742603e-05                                         | 23.8294314381271 | 0.221161165317279   |   |    |
| 4 188                                           | lipid transport                                              |                  |                     |   |    |
| GO:0060192                                      | 5.82922159086122e-05                                         | 240.433333333333 | 0.0117638917721957  |   |    |
| 2 10                                            | negative regulation of lipase activity                       |                  |                     |   |    |
| GO:0030299                                      | 8.53769851992569e-05                                         | 192.32           | 0.0141166701266348  | 2 | 12 |
| intestinal cholesterol absorption               |                                                              |                  |                     |   |    |
| GO:0032372                                      | 8.53769851992569e-05                                         | 192.32           | 0.0141166701266348  | 2 | 12 |
| negative regulation of sterol transport         |                                                              |                  |                     |   |    |
| GO:0032375                                      | 8.53769851992569e-05                                         | 192.32           | 0.0141166701266348  | 2 | 12 |
| negative regulation of cholesterol transport    |                                                              |                  |                     |   |    |
| GO:0034433                                      | 8.53769851992569e-05                                         | 192.32           | 0.0141166701266348  | 2 | 12 |
| steroid esterification                          |                                                              |                  |                     |   |    |
| GO:0034434                                      | 8.53769851992569e-05                                         | 192.32           | 0.0141166701266348  | 2 | 12 |
| sterol esterification                           |                                                              |                  |                     |   |    |
| GO:0034435                                      | 8.53769851992569e-05                                         | 192.32           | 0.0141166701266348  | 2 | 12 |
| cholesterol esterification                      |                                                              |                  |                     |   |    |
| GO:0010876                                      | 9.73990908507416e-05                                         | 20.7407947502734 | 0.252923673102207   |   |    |
| 4 215                                           | lipid localization                                           |                  |                     |   |    |
| GO:0055088                                      | 0.00010901190307642                                          | 39.4395604395604 | 0.0952875233547851  |   |    |
| 3 81                                            | lipid homeostasis                                            |                  |                     |   |    |
| GO:0044241                                      | 0.000135545311571209                                         | 147.907692307692 | 0.0176458376582935  |   |    |
| 2 15                                            | lipid digestion                                              |                  |                     |   |    |
| GO:0050995                                      | 0.000175320638318622                                         | 128.168888888889 | 0.0199986160127327  |   |    |
| 2 17                                            | negative regulation of lipid catabolic process               |                  |                     |   |    |
| GO:0046486                                      | 0.000199633252261023                                         | 17.1088989441931 | 0.304684796899869   |   |    |
| 4 259                                           | glycerolipid metabolic process                               |                  |                     |   |    |
| GO:0042157                                      | 0.000203765598651705                                         | 31.6723122238586 | 0.117638917721957   |   |    |
| 3 100                                           | lipoprotein metabolic process                                |                  |                     |   |    |
| GO:0006656                                      | 0.000220135062408993                                         | 113.074509803922 | 0.0223513943671718  |   |    |
| 2 19                                            | phosphatidylcholine biosynthetic process                     |                  |                     |   |    |
| GO:0044058                                      | 0.000220135062408993                                         | 113.074509803922 | 0.0223513943671718  |   |    |
| 2 19                                            | regulation of digestive system process                       |                  |                     |   |    |
| GO:0006066                                      | 0.000221117517056833                                         | 16.6435701702877 | 0.312919521140405   |   |    |
| 4 266                                           | alcohol metabolic process                                    |                  |                     |   |    |
| GO:0050892                                      | 0.00024442533295198                                          | 106.785185185185 | 0.0235277835443914  |   |    |
| 2 20                                            | intestinal absorption                                        |                  |                     |   |    |
| GO:0008202                                      | 0.000247666698828858                                         | 16.1413105413105 | 0.322330634558162   |   |    |
| 4 274                                           | steroid metabolic process                                    |                  |                     |   |    |
| GO:0045940                                      | 0.000269967461932187                                         | 101.157894736842 | 0.024704172721611   |   |    |
| 2 21                                            | positive regulation of steroid metabolic process             |                  |                     |   |    |
| GO:0070328                                      | 0.000269967461932187                                         | 101.157894736842 | 0.024704172721611   |   |    |

Stable4\_20PerPair

|            |     |                                                                   |                   |                     |                    |   |
|------------|-----|-------------------------------------------------------------------|-------------------|---------------------|--------------------|---|
| 2          | 21  | triglyceride homeostasis                                          |                   |                     |                    |   |
| GO:0032369 |     | 0.000296758818738297                                              | 96.09333333333333 |                     | 0.0258805618988305 |   |
| 2          | 22  | negative regulation of lipid transport                            |                   |                     |                    |   |
| GO:0050710 |     | 0.000296758818738297                                              | 96.09333333333333 |                     | 0.0258805618988305 |   |
| 2          | 22  | negative regulation of cytokine secretion                         |                   |                     |                    |   |
| GO:0046461 |     | 0.00035407871258923                                               | 87.34545454545454 |                     | 0.0282333402532697 |   |
| 2          | 24  | neutral lipid catabolic process                                   |                   |                     |                    |   |
| GO:0046464 |     | 0.00035407871258923                                               | 87.34545454545454 |                     | 0.0282333402532697 |   |
| 2          | 24  | acylglycerol catabolic process                                    |                   |                     |                    |   |
| GO:0006576 |     | 0.000451106961994736                                              | 23.9497767857143  |                     | 0.154106982215764  |   |
| 3          | 131 | cellular biogenic amine metabolic process                         |                   |                     |                    |   |
| GO:0030258 |     | 0.000631622485874444                                              | 21.264880952381   | 0.172929209051277   |                    | 3 |
| 147        |     | lipid modification                                                |                   |                     |                    |   |
| GO:0046503 |     | 0.000632803923949525                                              | 64.01777777777778 |                     | 0.0376444536710262 |   |
| 2          | 32  | glycerolipid catabolic process                                    |                   |                     |                    |   |
| GO:0050709 |     | 0.000801542709238449                                              | 56.4705882352941  |                     | 0.0423500103799045 |   |
| 2          | 36  | negative regulation of protein secretion                          |                   |                     |                    |   |
| GO:0002718 |     | 0.000893183771772659                                              | 53.3259259259259  |                     | 0.0447027887343436 |   |
| 2          | 38  | regulation of cytokine production involved in immune response     |                   |                     |                    |   |
| GO:0006650 |     | 0.000947064446731535                                              | 18.4182444061962  |                     | 0.198809770950107  |   |
| 3          | 169 | glycerophospholipid metabolic process                             |                   |                     |                    |   |
| GO:0050994 |     | 0.000989645204184707                                              | 50.5122807017544  |                     | 0.0470555670887828 |   |
| 2          | 40  | regulation of lipid catabolic process                             |                   |                     |                    |   |
| GO:0002367 |     | 0.00114333075790981                                               | 46.8065040650406  |                     | 0.0505847346204415 |   |
| 2          | 43  | cytokine production involved in immune response                   |                   |                     |                    |   |
| GO:0044106 |     | 0.00119191032005846                                               | 16.9690476190476  |                     | 0.215279219431181  |   |
| 3          | 183 | cellular amine metabolic process                                  |                   |                     |                    |   |
| GO:0019216 |     | 0.0014100229618061                                                | 15.9794315632012  |                     | 0.228219500380596  |   |
| 3          | 194 | regulation of lipid metabolic process                             |                   |                     |                    |   |
| GO:0022600 |     | 0.00154354313670417                                               | 39.96111111111111 |                     | 0.0588194588609785 |   |
| 2          | 50  | digestive system process                                          |                   |                     |                    |   |
| GO:0009308 |     | 0.00158348809063928                                               | 15.3284278535535  |                     | 0.237630613798353  |   |
| 3          | 202 | amine metabolic process                                           |                   |                     |                    |   |
| GO:0006954 |     | 0.00176185480686079                                               | 9.38931810547531  |                     | 0.543491799875441  |   |
| 4          | 462 | inflammatory response                                             |                   |                     |                    |   |
| GO:0034763 |     | 0.001798132633664                                                 | 36.8769230769231  |                     | 0.0635250155698568 |   |
| 2          | 54  | negative regulation of transmembrane transport                    |                   |                     |                    |   |
| GO:0045833 |     | 0.001798132633664                                                 | 36.8769230769231  |                     | 0.0635250155698568 |   |
| 2          | 54  | negative regulation of lipid metabolic process                    |                   |                     |                    |   |
| GO:0002700 |     | 0.00243884182336189                                               | 31.416393442623   | 0.0741125181648329  |                    | 2 |
| 63         |     | regulation of production of molecular mediator of immune response |                   |                     |                    |   |
| GO:0019218 |     | 0.00243884182336189                                               | 31.416393442623   | 0.0741125181648329  |                    | 2 |
| 63         |     | regulation of steroid metabolic process                           |                   |                     |                    |   |
| GO:0050728 |     | 0.00251577557013646                                               | 30.9075268817204  |                     | 0.0752889073420525 |   |
| 2          | 64  | negative regulation of inflammatory response                      |                   |                     |                    |   |
| GO:0006644 |     | 0.00262020870528851                                               | 12.781512605042   | 0.283509791709916   |                    | 3 |
| 241        |     | phospholipid metabolic process                                    |                   |                     |                    |   |
| GO:0051051 |     | 0.00300684492669438                                               | 12.1577142857143  |                     | 0.297626461836551  |   |
| 3          | 253 | negative regulation of transport                                  |                   |                     |                    |   |
| GO:0009895 |     | 0.00325917000526778                                               | 26.9727699530516  |                     | 0.0858764099370286 |   |
| 2          | 73  | negative regulation of catabolic process                          |                   |                     |                    |   |
| GO:0050707 |     | 0.00343672534671266                                               | 26.2301369863014  |                     | 0.0882291882914677 |   |
| 2          | 75  | regulation of cytokine secretion                                  |                   |                     |                    |   |
| GO:0009436 |     | 0.00352526115515339                                               | 451               | 0.00352916753165871 | 1                  | 3 |
|            |     | glyoxylate catabolic process                                      |                   |                     |                    |   |
| GO:0010982 |     | 0.00352526115515339                                               | 451               | 0.00352916753165871 | 1                  | 3 |
|            |     | regulation of high-density lipoprotein particle clearance         |                   |                     |                    |   |
| GO:0010989 |     | 0.00352526115515339                                               | 451               | 0.00352916753165871 | 1                  | 3 |
|            |     | negative regulation of low-density lipoprotein particle clearance |                   |                     |                    |   |
| GO:0019532 |     | 0.00352526115515339                                               | 451               | 0.00352916753165871 | 1                  | 3 |
|            |     | oxalate transport                                                 |                   |                     |                    |   |
| GO:0050711 |     | 0.00352526115515339                                               | 451               | 0.00352916753165871 | 1                  | 3 |
|            |     | negative regulation of interleukin-1 secretion                    |                   |                     |                    |   |



Stable4\_20PerPair

|            |                     |                                                                         |                       |
|------------|---------------------|-------------------------------------------------------------------------|-----------------------|
| GO:0031348 | 0.0038051697756915  | 24.8606060606061                                                        | 0.092934745000346     |
| 2          | 79                  | negative regulation of defense response                                 |                       |
| GO:0006524 | 0.00469774665905387 | 300.645833333333                                                        | 0.00470555670887828   |
| 1          | 4                   | alanine catabolic process                                               |                       |
| GO:0009080 | 0.00469774665905387 | 300.645833333333                                                        | 0.00470555670887828   |
| 1          | 4                   | pyruvate family amino acid catabolic process                            |                       |
| GO:0010915 | 0.00469774665905387 | 300.645833333333                                                        | 0.00470555670887828   |
| 1          | 4                   | regulation of very-low-density lipoprotein particle clearance           |                       |
| GO:0010916 | 0.00469774665905387 | 300.645833333333                                                        | 0.00470555670887828   |
| 1          | 4                   | negative regulation of very-low-density lipoprotein particle clearance  |                       |
| GO:0042851 | 0.00469774665905387 | 300.645833333333                                                        | 0.00470555670887828   |
| 1          | 4                   | L-alanine metabolic process                                             |                       |
| GO:0042853 | 0.00469774665905387 | 300.645833333333                                                        | 0.00470555670887828   |
| 1          | 4                   | L-alanine catabolic process                                             |                       |
| GO:0090209 | 0.00469774665905387 | 300.645833333333                                                        | 0.00470555670887828   |
| 1          | 4                   | negative regulation of triglyceride metabolic process                   |                       |
| GO:0050663 | 0.00469846554697515 | 22.2449612403101                                                        | 0.103522247595322     |
| 2          | 88                  | cytokine secretion                                                      |                       |
| GO:0051129 | 0.00476380627719108 | 10.2704600484262                                                        | 0.350563974811432     |
| 3          | 298                 | negative regulation of cellular component organization                  |                       |
| GO:0045834 | 0.00512370858432933 | 21.2503703703704                                                        | 0.1082278043042 2     |
| 92         |                     | positive regulation of lipid metabolic process                          |                       |
| GO:0031647 | 0.00556610375852272 | 20.3404255319149                                                        | 0.112933361013079     |
| 2          | 96                  | regulation of protein stability                                         |                       |
| GO:0051224 | 0.00567936485189403 | 20.1249122807018                                                        | 0.114109750190298     |
| 2          | 97                  | negative regulation of protein transport                                |                       |
| GO:0006641 | 0.00579368615702643 | 19.9138888888889                                                        | 0.115286139367518     |
| 2          | 98                  | triglyceride metabolic process                                          |                       |
| GO:0006522 | 0.00586893363952024 | 225.46875                                                               | 0.00588194588609785 1 |
| 5          |                     | alanine metabolic process                                               |                       |
| GO:0009078 | 0.00586893363952024 | 225.46875                                                               | 0.00588194588609785 1 |
| 5          |                     | pyruvate family amino acid metabolic process                            |                       |
| GO:0042866 | 0.00586893363952024 | 225.46875                                                               | 0.00588194588609785 1 |
| 5          |                     | pyruvate biosynthetic process                                           |                       |
| GO:0051005 | 0.00586893363952024 | 225.46875                                                               | 0.00588194588609785 1 |
| 5          |                     | negative regulation of lipoprotein lipase activity                      |                       |
| GO:0002440 | 0.00602550001428533 | 19.5047619047619                                                        | 0.117638917721957     |
| 2          | 100                 | production of molecular mediator of immune response                     |                       |
| GO:0051241 | 0.00606434498783987 | 9.39130434782609                                                        | 0.38232648259636      |
| 3          | 325                 | negative regulation of multicellular organismal process                 |                       |
| GO:0006639 | 0.00638111380335713 | 18.9214521452145                                                        | 0.121168085253616     |
| 2          | 103                 | acylglycerol metabolic process                                          |                       |
| GO:0006638 | 0.00650174719451049 | 18.7346405228758                                                        | 0.122344474430835     |
| 2          | 104                 | neutral lipid metabolic process                                         |                       |
| GO:0060191 | 0.00650174719451049 | 18.7346405228758                                                        | 0.122344474430835     |
| 2          | 104                 | regulation of lipase activity                                           |                       |
| GO:0002526 | 0.00662342443514267 | 18.5514563106796                                                        | 0.123520863608055     |
| 2          | 105                 | acute inflammatory response                                             |                       |
| GO:0046474 | 0.00674614320171622 | 18.3717948717949                                                        | 0.124697252785274     |
| 2          | 106                 | glycerophospholipid biosynthetic process                                |                       |
| GO:0000244 | 0.00703882344487339 | 180.3625                                                                | 0.00705833506331742 1 |
| 6          |                     | assembly of spliceosomal tri-snRNP                                      |                       |
| GO:0006545 | 0.00703882344487339 | 180.3625                                                                | 0.00705833506331742 1 |
| 6          |                     | glycine biosynthetic process                                            |                       |
| GO:0006642 | 0.00703882344487339 | 180.3625                                                                | 0.00705833506331742 1 |
| 6          |                     | triglyceride mobilization                                               |                       |
| GO:0006787 | 0.00703882344487339 | 180.3625                                                                | 0.00705833506331742 1 |
| 6          |                     | porphyrin-containing compound catabolic process                         |                       |
| GO:0010804 | 0.00703882344487339 | 180.3625                                                                | 0.00705833506331742 1 |
| 6          |                     | negative regulation of tumor necrosis factor-mediated signaling pathway |                       |
| GO:0010985 | 0.00703882344487339 | 180.3625                                                                | 0.00705833506331742 1 |
| 6          |                     | negative regulation of lipoprotein particle clearance                   |                       |

Stable4\_20PerPair

|                                                                     |                                                           |                  |                     |   |
|---------------------------------------------------------------------|-----------------------------------------------------------|------------------|---------------------|---|
| GO:0010988                                                          | 0.00703882344487339                                       | 180.3625         | 0.00705833506331742 | 1 |
| 6                                                                   | regulation of low-density lipoprotein particle clearance  |                  |                     |   |
| GO:0033015                                                          | 0.00703882344487339                                       | 180.3625         | 0.00705833506331742 | 1 |
| 6                                                                   | tetrapyrrole catabolic process                            |                  |                     |   |
| GO:0034115                                                          | 0.00703882344487339                                       | 180.3625         | 0.00705833506331742 | 1 |
| 6                                                                   | negative regulation of heterotypic cell-cell adhesion     |                  |                     |   |
| GO:0034379                                                          | 0.00703882344487339                                       | 180.3625         | 0.00705833506331742 | 1 |
| 6                                                                   | very-low-density lipoprotein particle assembly            |                  |                     |   |
| GO:0034447                                                          | 0.00703882344487339                                       | 180.3625         | 0.00705833506331742 | 1 |
| 6                                                                   | very-low-density lipoprotein particle clearance           |                  |                     |   |
| GO:0042167                                                          | 0.00703882344487339                                       | 180.3625         | 0.00705833506331742 | 1 |
| 6                                                                   | heme catabolic process                                    |                  |                     |   |
| GO:0046149                                                          | 0.00703882344487339                                       | 180.3625         | 0.00705833506331742 | 1 |
| 6                                                                   | pigment catabolic process                                 |                  |                     |   |
| GO:0046185                                                          | 0.00703882344487339                                       | 180.3625         | 0.00705833506331742 | 1 |
| 6                                                                   | aldehyde catabolic process                                |                  |                     |   |
| GO:0007586                                                          | 0.00712052547373714                                       | 17.8529595015576 | 0.128226420316933   |   |
| 2                                                                   | 109 digestion                                             |                  |                     |   |
| GO:0051048                                                          | 0.00750419816453199                                       | 17.3624242424242 | 0.131755587848592   |   |
| 2                                                                   | 112 negative regulation of secretion                      |                  |                     |   |
| GO:0007266                                                          | 0.00803010609168622                                       | 16.7485380116959 | 0.13646114455747    |   |
| 2                                                                   | 116 Rho protein signal transduction                       |                  |                     |   |
| GO:0032409                                                          | 0.00803010609168622                                       | 16.7485380116959 | 0.13646114455747    |   |
| 2                                                                   | 116 regulation of transporter activity                    |                  |                     |   |
| GO:0050708                                                          | 0.00803010609168622                                       | 16.7485380116959 | 0.13646114455747    |   |
| 2                                                                   | 116 regulation of protein secretion                       |                  |                     |   |
| GO:0034382                                                          | 0.00820741742212772                                       | 150.291666666667 | 0.00823472424053699 |   |
| 1                                                                   | 7 chylomicron remnant clearance                           |                  |                     |   |
| GO:0071830                                                          | 0.00820741742212772                                       | 150.291666666667 | 0.00823472424053699 |   |
| 1                                                                   | 7 triglyceride-rich lipoprotein particle clearance        |                  |                     |   |
| GO:0032102                                                          | 0.00857227320936868                                       | 16.1762711864407 | 0.141166701266348   |   |
| 2                                                                   | 120 negative regulation of response to external stimulus  |                  |                     |   |
| GO:0010951                                                          | 0.00898948094198444                                       | 15.7719008264463 | 0.144695868798007   |   |
| 2                                                                   | 123 negative regulation of endopeptidase activity         |                  |                     |   |
| GO:0006835                                                          | 0.00937471691699199                                       | 128.8125         | 0.00941111341775656 | 1 |
| 8                                                                   | dicarboxylic acid transport                               |                  |                     |   |
| GO:0010896                                                          | 0.00937471691699199                                       | 128.8125         | 0.00941111341775656 | 1 |
| 8                                                                   | regulation of triglyceride catabolic process              |                  |                     |   |
| GO:0032691                                                          | 0.00937471691699199                                       | 128.8125         | 0.00941111341775656 | 1 |
| 8                                                                   | negative regulation of interleukin-1 beta production      |                  |                     |   |
| GO:0045416                                                          | 0.00937471691699199                                       | 128.8125         | 0.00941111341775656 | 1 |
| 8                                                                   | positive regulation of interleukin-8 biosynthetic process |                  |                     |   |
| GO:0046487                                                          | 0.00937471691699199                                       | 128.8125         | 0.00941111341775656 | 1 |
| 8                                                                   | glyoxylate metabolic process                              |                  |                     |   |
| GO:0048261                                                          | 0.00937471691699199                                       | 128.8125         | 0.00941111341775656 | 1 |
| 8                                                                   | negative regulation of receptor-mediated endocytosis      |                  |                     |   |
| GO:0010466                                                          | 0.00941569131911977                                       | 15.3870967741935 | 0.148225036329666   |   |
| 2                                                                   | 126 negative regulation of peptidase activity             |                  |                     |   |
| GO:0007369                                                          | 0.00955975150155423                                       | 15.2629333333333 | 0.149401425506885   |   |
| 2                                                                   | 127 gastrulation                                          |                  |                     |   |
| Tissue: Whole_Blood=>Skin_Sun_Exposed_Lower_leg Type: asymmetric    |                                                           |                  |                     |   |
| SourceGene: EFNB2(ENSG00000125266.5)                                |                                                           |                  |                     |   |
| TargetGeneSet: TMEM222 PTPRU FCGR1A IQGAP3 CHRND HACL1 QTRTD1 TACC3 |                                                           |                  |                     |   |
| PGBD1 KIFC1 SRPK1 BET3L EPO C7orf34 RP11 PTGS1 MKI67 TMEM80         |                                                           |                  |                     |   |
| NALCN-AS1 CTD CASC5 KIF23 PRMT7 KIF18B SKA1 UBE2S                   |                                                           |                  |                     |   |
| GOBPID Pvalue OddsRatio ExpCount Count Size Term                    |                                                           |                  |                     |   |
| GO:0000087                                                          | 9.06337916393127e-06                                      | 15.9050847457627 | 0.523147187045879   |   |
| 6                                                                   | 360 M phase of mitotic cell cycle                         |                  |                     |   |
| GO:0007017                                                          | 1.49419123300948e-05                                      | 14.5147286821705 | 0.571102345858418   |   |
| 6                                                                   | 393 microtubule-based process                             |                  |                     |   |
| GO:0051301                                                          | 3.29497714564307e-05                                      | 12.5417040358744 | 0.656840357068715   |   |
| 6                                                                   | 452 cell division                                         |                  |                     |   |
| GO:0007059                                                          | 4.44325215119729e-05                                      | 24.7301038062284 | 0.20344612829562    |   |

STable4\_20PerPair

|            |         |                                                                    |                   |                     |                    |   |   |
|------------|---------|--------------------------------------------------------------------|-------------------|---------------------|--------------------|---|---|
| 4          | 140     | chromosome segregation                                             |                   |                     |                    |   |   |
| GO:0000280 |         | 0.000119704517526048                                               | 12.758152173913   | 0.508615320739049   |                    |   | 5 |
| 350        | nuclear | division                                                           |                   |                     |                    |   |   |
| GO:0007067 |         | 0.000119704517526048                                               | 12.758152173913   | 0.508615320739049   |                    |   | 5 |
| 350        | mitosis |                                                                    |                   |                     |                    |   |   |
| GO:0048285 |         | 0.000155361824498736                                               | 12.0419520547945  |                     | 0.537679053352709  |   |   |
| 5          | 370     | organelle fission                                                  |                   |                     |                    |   |   |
| GO:0000226 |         | 0.000547386671293492                                               | 12.5771365149834  |                     | 0.390907203653726  |   |   |
| 4          | 269     | microtubule cytoskeleton organization                              |                   |                     |                    |   |   |
| GO:0000387 |         | 0.000911800213719304                                               | 52.2722323049002  |                     | 0.0450487855511729 |   |   |
| 2          | 31      | spliceosomal snRNP assembly                                        |                   |                     |                    |   |   |
| GO:0007018 |         | 0.00108513254464467                                                | 17.1354916067146  |                     | 0.206352501556986  |   |   |
| 3          | 142     | microtubule-based movement                                         |                   |                     |                    |   |   |
| GO:0000377 |         | 0.00305627430583342                                                | 11.7985074626866  |                     | 0.296450072659332  |   |   |
| 3          | 204     | RNA splicing, via transesterification reactions with bulged        |                   |                     |                    |   |   |
|            |         | adenosine as nucleophile                                           |                   |                     |                    |   |   |
| GO:0000398 |         | 0.00305627430583342                                                | 11.7985074626866  |                     | 0.296450072659332  |   |   |
| 3          | 204     | nuclear mRNA splicing, via spliceosome                             |                   |                     |                    |   |   |
| GO:0000375 |         | 0.00327241733481647                                                | 11.5080906148867  |                     | 0.303716005812747  |   |   |
| 3          | 209     | RNA splicing, via transesterification reactions                    |                   |                     |                    |   |   |
| GO:0030953 |         | 0.00435352854395898                                                | 360.7             | 0.00435955989204899 |                    | 1 | 3 |
|            |         | astral microtubule organization                                    |                   |                     |                    |   |   |
| GO:0007286 |         | 0.00510083505168618                                                | 20.9912280701754  |                     | 0.107535810670542  |   |   |
| 2          | 74      | spermatid development                                              |                   |                     |                    |   |   |
| GO:0051051 |         | 0.00558547112112292                                                | 9.453333333333333 |                     | 0.367656217562798  |   |   |
| 3          | 253     | negative regulation of transport                                   |                   |                     |                    |   |   |
| GO:0048515 |         | 0.00565138779423199                                                | 19.8808864265928  |                     | 0.113348557193274  |   |   |
| 2          | 78      | spermatid differentiation                                          |                   |                     |                    |   |   |
| GO:0008617 |         | 0.00580068911293552                                                | 240.45            | 0.00581274652273199 |                    | 1 | 4 |
|            |         | guanosine metabolic process                                        |                   |                     |                    |   |   |
| GO:0010766 |         | 0.00580068911293552                                                | 240.45            | 0.00581274652273199 |                    | 1 | 4 |
|            |         | negative regulation of sodium ion transport                        |                   |                     |                    |   |   |
| GO:0033601 |         | 0.00580068911293552                                                | 240.45            | 0.00581274652273199 |                    | 1 | 4 |
|            |         | positive regulation of mammary gland epithelial cell proliferation |                   |                     |                    |   |   |
| GO:0035519 |         | 0.00580068911293552                                                | 240.45            | 0.00581274652273199 |                    | 1 | 4 |
|            |         | protein K29-linked ubiquitination                                  |                   |                     |                    |   |   |
| GO:0044314 |         | 0.00580068911293552                                                | 240.45            | 0.00581274652273199 |                    | 1 | 4 |
|            |         | protein K27-linked ubiquitination                                  |                   |                     |                    |   |   |
| GO:0051256 |         | 0.00580068911293552                                                | 240.45            | 0.00581274652273199 |                    | 1 | 4 |
|            |         | spindle midzone assembly involved in mitosis                       |                   |                     |                    |   |   |
| GO:0071474 |         | 0.00580068911293552                                                | 240.45            | 0.00581274652273199 |                    | 1 | 4 |
|            |         | cellular hyperosmotic response                                     |                   |                     |                    |   |   |
| GO:0007051 |         | 0.00593647358341864                                                | 19.3684210526316  |                     | 0.11625493045464   |   |   |
| 2          | 80      | spindle organization                                               |                   |                     |                    |   |   |
| GO:0051302 |         | 0.0062280502125474                                                 | 18.8815789473684  |                     | 0.119161303716006  |   |   |
| 2          | 82      | regulation of cell division                                        |                   |                     |                    |   |   |
| GO:0000236 |         | 0.0066775058852177                                                 | 18.1953075459734  |                     | 0.123520863608055  |   |   |
| 2          | 85      | mitotic prometaphase                                               |                   |                     |                    |   |   |
| GO:0010700 |         | 0.00724584627557323                                                | 180.325           | 0.00726593315341499 |                    | 1 | 5 |
|            |         | negative regulation of norepinephrine secretion                    |                   |                     |                    |   |   |
| GO:0032811 |         | 0.00724584627557323                                                | 180.325           | 0.00726593315341499 |                    | 1 | 5 |
|            |         | negative regulation of epinephrine secretion                       |                   |                     |                    |   |   |
| GO:0035247 |         | 0.00724584627557323                                                | 180.325           | 0.00726593315341499 |                    | 1 | 5 |
|            |         | peptidyl-arginine omega-N-methylation                              |                   |                     |                    |   |   |
| GO:0043985 |         | 0.00724584627557323                                                | 180.325           | 0.00726593315341499 |                    | 1 | 5 |
|            |         | histone H4-R3 methylation                                          |                   |                     |                    |   |   |
| GO:0051255 |         | 0.00724584627557323                                                | 180.325           | 0.00726593315341499 |                    | 1 | 5 |
|            |         | spindle midzone assembly                                           |                   |                     |                    |   |   |
| GO:0032886 |         | 0.00761949636656151                                                | 16.9615612063868  |                     | 0.132239983392153  |   |   |
| 2          | 91      | regulation of microtubule-based process                            |                   |                     |                    |   |   |
| GO:0022618 |         | 0.00827901156141599                                                | 16.2275042444822  |                     | 0.138052729914885  |   |   |
| 2          | 95      | ribonucleoprotein complex assembly                                 |                   |                     |                    |   |   |
| GO:0032507 |         | 0.00827901156141599                                                | 16.2275042444822  |                     | 0.138052729914885  |   |   |

Stable4\_20PerPair

|            |     |                                                                            |                  |                     |   |                    |   |    |  |
|------------|-----|----------------------------------------------------------------------------|------------------|---------------------|---|--------------------|---|----|--|
| 2          | 95  | maintenance of protein location in cell                                    |                  |                     |   |                    |   |    |  |
| GO:000244  |     | 0.00868900266683825                                                        | 144.25           | 0.00871911978409799 | 1 | 6                  |   |    |  |
|            |     | assembly of spliceosomal tri-snRNP                                         |                  |                     |   |                    |   |    |  |
| GO:0001561 |     | 0.00868900266683825                                                        | 144.25           | 0.00871911978409799 | 1 | 6                  |   |    |  |
|            |     | fatty acid alpha-oxidation                                                 |                  |                     |   |                    |   |    |  |
| GO:0014060 |     | 0.00868900266683825                                                        | 144.25           | 0.00871911978409799 | 1 | 6                  |   |    |  |
|            |     | regulation of epinephrine secretion                                        |                  |                     |   |                    |   |    |  |
| GO:0035092 |     | 0.00868900266683825                                                        | 144.25           | 0.00871911978409799 | 1 | 6                  |   |    |  |
|            |     | sperm chromatin condensation                                               |                  |                     |   |                    |   |    |  |
| GO:0048630 |     | 0.00868900266683825                                                        | 144.25           | 0.00871911978409799 | 1 | 6                  |   |    |  |
|            |     | skeletal muscle tissue growth                                              |                  |                     |   |                    |   |    |  |
| GO:0071826 |     | 0.00913836677595833                                                        | 15.3941997851772 |                     |   | 0.1453186630683    | 2 |    |  |
| 100        |     | ribonucleoprotein complex subunit organization                             |                  |                     |   |                    |   |    |  |
|            |     | Tissue: Whole_Blood=>Skin_Sun_Exposed_Lower_leg Type: asymmetric           |                  |                     |   |                    |   |    |  |
|            |     | SourceGene: ENSG00000201678.1                                              |                  |                     |   |                    |   |    |  |
|            |     | TargetGeneSet: CTSS APOA1BP F5 RP11 RNF187 STEAP3 VDAC1 VEGFA              |                  |                     |   |                    |   |    |  |
|            |     | SUMO2P8 SND1 SNX18P8 SPAG6 TMEM123 CASP7 LDHA C11orf34 GAPDH TPI1          |                  |                     |   |                    |   |    |  |
|            |     | ITPR2 CCDC59 MTHFD1 THBS1 PKM2 ATP6V0CP1 NGFR ZFP161 ST8SIA5 GPI           |                  |                     |   |                    |   |    |  |
|            |     | ZNF155 SLC1A5 TNNC2 C20orf166 PGK1                                         |                  |                     |   |                    |   |    |  |
|            |     | GOBPID Pvalue OddsRatio ExpCount Count Size Term                           |                  |                     |   |                    |   |    |  |
| GO:0006096 |     | 1.7034681239111e-09                                                        | 69.9691558441558 |                     |   | 0.120130094803128  |   |    |  |
| 6          | 62  | glycolysis                                                                 |                  |                     |   |                    |   |    |  |
| GO:0006007 |     | 5.48555831129968e-09                                                       | 56.7351778656126 |                     |   | 0.1453186630683    | 6 |    |  |
| 75         |     | glucose catabolic process                                                  |                  |                     |   |                    |   |    |  |
| GO:0019320 |     | 1.66317054988727e-08                                                       | 46.5551948051948 |                     |   | 0.17438239568196   |   |    |  |
| 6          | 90  | hexose catabolic process                                                   |                  |                     |   |                    |   |    |  |
| GO:0046365 |     | 2.16362420271596e-08                                                       | 44.426652892562  | 0.182132724378936   |   |                    | 6 |    |  |
| 94         |     | monosaccharide catabolic process                                           |                  |                     |   |                    |   |    |  |
| GO:0016052 |     | 4.79604883791271e-07                                                       | 25.6058612440191 |                     |   | 0.306137983530551  |   |    |  |
| 6          | 158 | carbohydrate catabolic process                                             |                  |                     |   |                    |   |    |  |
| GO:0006006 |     | 1.79729684751679e-06                                                       | 20.2144886363636 |                     |   | 0.383641270500311  |   |    |  |
| 6          | 198 | glucose metabolic process                                                  |                  |                     |   |                    |   |    |  |
| GO:0006094 |     | 4.45119409156979e-06                                                       | 44.3487654320988 |                     |   | 0.112379766106152  |   |    |  |
| 4          | 58  | gluconeogenesis                                                            |                  |                     |   |                    |   |    |  |
| GO:0019318 |     | 4.72619195946909e-06                                                       | 16.9796650717703 |                     |   | 0.453394228773095  |   |    |  |
| 6          | 234 | hexose metabolic process                                                   |                  |                     |   |                    |   |    |  |
| GO:0019319 |     | 5.82153242119713e-06                                                       | 41.2787356321839 |                     |   | 0.120130094803128  |   |    |  |
| 4          | 62  | hexose biosynthetic process                                                |                  |                     |   |                    |   |    |  |
| GO:0046364 |     | 7.48134892633618e-06                                                       | 38.6048387096774 |                     |   | 0.127880423500104  |   |    |  |
| 4          | 66  | monosaccharide biosynthetic process                                        |                  |                     |   |                    |   |    |  |
| GO:0005996 |     | 7.74068860155788e-06                                                       | 15.5246440306681 |                     |   | 0.494083454432219  |   |    |  |
| 6          | 255 | monosaccharide metabolic process                                           |                  |                     |   |                    |   |    |  |
| GO:0006091 |     | 1.31419964030225e-05                                                       | 11.0863024544735 |                     |   | 0.829285170576431  |   |    |  |
| 7          | 428 | generation of precursor metabolites and energy                             |                  |                     |   |                    |   |    |  |
| GO:0040037 |     | 0.000161361374145993                                                       | 138.605769230769 |                     |   | 0.01937582174244   |   |    |  |
| 2          | 10  | negative regulation of fibroblast growth factor receptor signaling pathway |                  |                     |   |                    |   |    |  |
| GO:0016051 |     | 0.000377289487555806                                                       | 13.4914772727273 |                     |   | 0.348764791363919  |   |    |  |
| 4          | 180 | carbohydrate biosynthetic process                                          |                  |                     |   |                    |   |    |  |
| GO:0002576 |     | 0.000539581552864316                                                       | 21.5145          | 0.160819320462252   |   |                    | 3 | 83 |  |
|            |     | platelet degranulation                                                     |                  |                     |   |                    |   |    |  |
| GO:0043536 |     | 0.000673184465959876                                                       | 61.5598290598291 |                     |   | 0.0387516434848799 |   |    |  |
| 2          | 20  | positive regulation of blood vessel endothelial cell migration             |                  |                     |   |                    |   |    |  |
| GO:0030168 |     | 0.000763050545273834                                                       | 11.1189358372457 |                     |   | 0.420455331810947  |   |    |  |
| 4          | 217 | platelet activation                                                        |                  |                     |   |                    |   |    |  |
| GO:0040036 |     | 0.000816491689859045                                                       | 55.3961538461538 |                     |   | 0.0426268078333679 |   |    |  |
| 2          | 22  | regulation of fibroblast growth factor receptor signaling pathway          |                  |                     |   |                    |   |    |  |
| GO:0051893 |     | 0.00105657514328283                                                        | 48.1605351170569 |                     |   | 0.0484395543560999 |   |    |  |
| 2          | 25  | regulation of focal adhesion assembly                                      |                  |                     |   |                    |   |    |  |
| GO:0090109 |     | 0.00105657514328283                                                        | 48.1605351170569 |                     |   | 0.0484395543560999 |   |    |  |
| 2          | 25  | regulation of cell-substrate junction assembly                             |                  |                     |   |                    |   |    |  |
| GO:0009266 |     | 0.00109970566046966                                                        | 16.6834951456311 |                     |   | 0.205383710469864  |   |    |  |
| 3          | 106 | response to temperature stimulus                                           |                  |                     |   |                    |   |    |  |

Stable4\_20PerPair

|            |                                                                                                                       |                  |                     |   |
|------------|-----------------------------------------------------------------------------------------------------------------------|------------------|---------------------|---|
| GO:0071363 | 0.00157815493339972                                                                                                   | 9.07884615384615 | 0.511521694000415   |   |
| 4 264      | cellular response to growth factor stimulus                                                                           |                  |                     |   |
| GO:0070848 | 0.00203506583769419                                                                                                   | 8.44922341696535 | 0.548335755311051   |   |
| 4 283      | response to growth factor stimulus                                                                                    |                  |                     |   |
| GO:0043535 | 0.00218978410065928                                                                                                   | 32.5542986425339 | 0.0697529582727839  |   |
| 2 36       | regulation of blood vessel endothelial cell migration                                                                 |                  |                     |   |
| GO:0008543 | 0.0022957669888139                                                                                                    | 12.7961194029851 | 0.265448757871428   |   |
| 3 137      | fibroblast growth factor receptor signaling pathway                                                                   |                  |                     |   |
| GO:0010595 | 0.0026982209398674                                                                                                    | 29.1194331983806 | 0.0775032869697599  |   |
| 2 40       | positive regulation of endothelial cell migration                                                                     |                  |                     |   |
| GO:0002040 | 0.00297130648490636                                                                                                   | 27.6596153846154 | 0.0813784513182479  |   |
| 2 42       | sprouting angiogenesis                                                                                                |                  |                     |   |
| GO:0048041 | 0.00297130648490636                                                                                                   | 27.6596153846154 | 0.0813784513182479  |   |
| 2 42       | focal adhesion assembly                                                                                               |                  |                     |   |
| GO:0044344 | 0.00308196496660673                                                                                                   | 11.4958389261745 | 0.294512490485088   |   |
| 3 152      | cellular response to fibroblast growth factor stimulus                                                                |                  |                     |   |
| GO:0071774 | 0.00308196496660673                                                                                                   | 11.4958389261745 | 0.294512490485088   |   |
| 3 152      | response to fibroblast growth factor stimulus                                                                         |                  |                     |   |
| GO:0043281 | 0.00381707674728929                                                                                                   | 10.6300621118012 | 0.317763476576016   |   |
| 3 164      | regulation of cysteine-type endopeptidase activity involved in apoptotic process                                      |                  |                     |   |
| GO:0010811 | 0.00402455770380558                                                                                                   | 23.5286415711948 | 0.0949415265379558  |   |
| 2 49       | positive regulation of cell-substrate adhesion                                                                        |                  |                     |   |
| GO:2000116 | 0.00415234104609564                                                                                                   | 10.306265060241  | 0.327451387447236   | 3 |
| 169        | regulation of cysteine-type endopeptidase activity                                                                    |                  |                     |   |
| GO:0002690 | 0.00418724208946625                                                                                                   | 23.036858974359  | 0.0968791087121998  | 2 |
| 50         | positive regulation of leukocyte chemotaxis                                                                           |                  |                     |   |
| GO:0043154 | 0.00522637642588173                                                                                                   | 20.468660968661  | 0.108504601757664   | 2 |
| 56         | negative regulation of cysteine-type endopeptidase activity involved in apoptotic process                             |                  |                     |   |
| GO:0001952 | 0.00540996391986441                                                                                                   | 20.0951048951049 | 0.110442183931908   |   |
| 2 57       | regulation of cell-matrix adhesion                                                                                    |                  |                     |   |
| GO:0007044 | 0.00540996391986441                                                                                                   | 20.0951048951049 | 0.110442183931908   |   |
| 2 57       | cell-substrate junction assembly                                                                                      |                  |                     |   |
| GO:0043534 | 0.00540996391986441                                                                                                   | 20.0951048951049 | 0.110442183931908   |   |
| 2 57       | blood vessel endothelial cell migration                                                                               |                  |                     |   |
| GO:0002688 | 0.00559649222465406                                                                                                   | 19.7348901098901 | 0.112379766106152   |   |
| 2 58       | regulation of leukocyte chemotaxis                                                                                    |                  |                     |   |
| GO:2000117 | 0.00578595009340963                                                                                                   | 19.387314439946  | 0.114317348280396   | 2 |
| 59         | negative regulation of cysteine-type endopeptidase activity                                                           |                  |                     |   |
| GO:0017014 | 0.00580189185011537                                                                                                   | 267.055555555556 | 0.00581274652273199 |   |
| 1 3        | protein nitrosylation                                                                                                 |                  |                     |   |
| GO:0018119 | 0.00580189185011537                                                                                                   | 267.055555555556 | 0.00581274652273199 |   |
| 1 3        | peptidyl-cysteine S-nitrosylation                                                                                     |                  |                     |   |
| GO:0019682 | 0.00580189185011537                                                                                                   | 267.055555555556 | 0.00581274652273199 |   |
| 1 3        | glyceraldehyde-3-phosphate metabolic process                                                                          |                  |                     |   |
| GO:0038086 | 0.00580189185011537                                                                                                   | 267.055555555556 | 0.00581274652273199 |   |
| 1 3        | VEGF-activated platelet-derived growth factor receptor signaling pathway                                              |                  |                     |   |
| GO:0038091 | 0.00580189185011537                                                                                                   | 267.055555555556 | 0.00581274652273199 |   |
| 1 3        | positive regulation of cell proliferation by VEGF-activated platelet derived growth factor receptor signaling pathway |                  |                     |   |
| GO:2001028 | 0.00580189185011537                                                                                                   | 267.055555555556 | 0.00581274652273199 |   |
| 1 3        | positive regulation of endothelial cell chemotaxis                                                                    |                  |                     |   |
| GO:0002687 | 0.00597832630913533                                                                                                   | 19.051724137931  | 0.11625493045464    | 2 |
| 60         | positive regulation of leukocyte migration                                                                            |                  |                     |   |
| GO:0010594 | 0.00762106028238352                                                                                                   | 16.7331002331002 | 0.131755587848592   |   |
| 2 68       | regulation of endothelial cell migration                                                                              |                  |                     |   |
| GO:0006868 | 0.00772863236978594                                                                                                   | 178.024691358025 | 0.00775032869697599 |   |
| 1 4        | glutamine transport                                                                                                   |                  |                     |   |
| GO:0010748 | 0.00772863236978594                                                                                                   | 178.024691358025 | 0.00775032869697599 |   |
| 1 4        | negative regulation of plasma membrane long-chain fatty acid transport                                                |                  |                     |   |

Stable4\_20PerPair

|                                                               |                                                                    |                  |                     |
|---------------------------------------------------------------|--------------------------------------------------------------------|------------------|---------------------|
| GO:0010757                                                    | 0.00772863236978594                                                | 178.024691358025 | 0.00775032869697599 |
| 1 4                                                           | negative regulation of plasminogen activation                      |                  |                     |
| GO:0032914                                                    | 0.00772863236978594                                                | 178.024691358025 | 0.00775032869697599 |
| 1 4                                                           | positive regulation of transforming growth factor beta1 production |                  |                     |
| GO:0001936                                                    | 0.00806015101635253                                                | 16.2386877828054 | 0.13563075219708    |
| 2 70                                                          | regulation of endothelial cell proliferation                       |                  |                     |
| GO:0050921                                                    | 0.00828389719599944                                                | 16.0022296544036 | 0.137568334371324   |
| 2 71                                                          | positive regulation of chemotaxis                                  |                  |                     |
| GO:0001666                                                    | 0.00840043789092221                                                | 7.93004651162791 | 0.422392913985191   |
| 3 218                                                         | response to hypoxia                                                |                  |                     |
| GO:0036293                                                    | 0.00861263490302064                                                | 7.85585253456221 | 0.426268078333679   |
| 3 220                                                         | response to decreased oxygen levels                                |                  |                     |
| GO:0010746                                                    | 0.00965177200387202                                                | 133.509259259259 | 0.00968791087121998 |
| 1 5                                                           | regulation of plasma membrane long-chain fatty acid transport      |                  |                     |
| GO:0031077                                                    | 0.00965177200387202                                                | 133.509259259259 | 0.00968791087121998 |
| 1 5                                                           | post-embryonic camera-type eye development                         |                  |                     |
| GO:0038083                                                    | 0.00965177200387202                                                | 133.509259259259 | 0.00968791087121998 |
| 1 5                                                           | peptidyl-tyrosine autophosphorylation                              |                  |                     |
| GO:0043117                                                    | 0.00965177200387202                                                | 133.509259259259 | 0.00968791087121998 |
| 1 5                                                           | positive regulation of vascular permeability                       |                  |                     |
| GO:0060753                                                    | 0.00965177200387202                                                | 133.509259259259 | 0.00968791087121998 |
| 1 5                                                           | regulation of mast cell chemotaxis                                 |                  |                     |
| GO:0060754                                                    | 0.00965177200387202                                                | 133.509259259259 | 0.00968791087121998 |
| 1 5                                                           | positive regulation of mast cell chemotaxis                        |                  |                     |
| GO:2001026                                                    | 0.00965177200387202                                                | 133.509259259259 | 0.00968791087121998 |
| 1 5                                                           | regulation of endothelial cell chemotaxis                          |                  |                     |
| GO:0045766                                                    | 0.00992752501912228                                                | 14.5212550607287 | 0.151131409591032   |
| 2 78                                                          | positive regulation of angiogenesis                                |                  |                     |
| Tissue: whole_Blood=>Skin_Sun_Exposed_Lower_leg Type: cluster |                                                                    |                  |                     |
| SourceGene: ENSG00000201678.1                                 |                                                                    |                  |                     |
| TargetGeneSet:                                                |                                                                    |                  |                     |
| SUMO2P8                                                       | SNX18P8                                                            | SPAG6            | TMEM123             |
| ITPR2                                                         | CCDC59                                                             | MTHFD1           | THBS1               |
| ZNF155                                                        | SLC1A5                                                             | TNNC2            | C20orf166           |
| GOBPID                                                        | Pvalue                                                             | OddsRatio        | ExpCount            |
| GO:0006096                                                    | 1.7034681239111e-09                                                | 69.9691558441558 | Count               |
| 6 62                                                          | glycolysis                                                         | Count            | Size                |
| GO:0006007                                                    | 5.48555831129968e-09                                               | 56.7351778656126 | Term                |
| 75 75                                                         | glucose catabolic process                                          |                  |                     |
| GO:0019320                                                    | 1.66317054988727e-08                                               | 46.5551948051948 | 0.120130094803128   |
| 6 90                                                          | hexose catabolic process                                           |                  |                     |
| GO:0046365                                                    | 2.16362420271596e-08                                               | 44.426652892562  | 0.17438239568196    |
| 94 94                                                         | monosaccharide catabolic process                                   |                  | 6                   |
| GO:0016052                                                    | 4.79604883791271e-07                                               | 25.6058612440191 | 0.306137983530551   |
| 6 158                                                         | carbohydrate catabolic process                                     |                  |                     |
| GO:0006006                                                    | 1.79729684751679e-06                                               | 20.2144886363636 | 0.127880423500104   |
| 6 198                                                         | glucose metabolic process                                          |                  |                     |
| GO:0006094                                                    | 4.45119409156979e-06                                               | 44.3487654320988 | 0.494083454432219   |
| 4 58                                                          | gluconeogenesis                                                    |                  |                     |
| GO:0019318                                                    | 4.72619195946909e-06                                               | 16.9796650717703 | 0.829285170576431   |
| 6 234                                                         | hexose metabolic process                                           |                  |                     |
| GO:0019319                                                    | 5.82153242119713e-06                                               | 41.2787356321839 | 0.120130094803128   |
| 4 62                                                          | hexose biosynthetic process                                        |                  |                     |
| GO:0046364                                                    | 7.48134892633618e-06                                               | 38.6048387096774 | 0.127880423500104   |
| 4 66                                                          | monosaccharide biosynthetic process                                |                  |                     |
| GO:0005996                                                    | 7.74068860155788e-06                                               | 15.5246440306681 | 0.494083454432219   |
| 6 255                                                         | monosaccharide metabolic process                                   |                  |                     |
| GO:0006091                                                    | 1.31419964030225e-05                                               | 11.0863024544735 | 0.829285170576431   |
| 7 428                                                         | generation of precursor metabolites and energy                     |                  |                     |
| GO:0040037                                                    | 0.000161361374145993                                               | 138.605769230769 | 0.01937582174244    |
| 2 10                                                          | negative regulation of fibroblast growth factor receptor signaling |                  |                     |
| pathway                                                       |                                                                    |                  |                     |
| GO:0016051                                                    | 0.000377289487555806                                               | 13.4914772727273 | 0.348764791363919   |

Stable4\_20PerPair

|            |     |                                                                                           |                  |                    |   |                     |
|------------|-----|-------------------------------------------------------------------------------------------|------------------|--------------------|---|---------------------|
| 4          | 180 | carbohydrate biosynthetic process                                                         |                  |                    |   |                     |
| GO:0002576 |     | 0.000539581552864316                                                                      | 21.5145          | 0.160819320462252  | 3 | 83                  |
|            |     | platelet degranulation                                                                    |                  |                    |   |                     |
| GO:0043536 |     | 0.000673184465959876                                                                      | 61.5598290598291 |                    |   | 0.0387516434848799  |
| 2          | 20  | positive regulation of blood vessel endothelial cell migration                            |                  |                    |   |                     |
| GO:0030168 |     | 0.000763050545273834                                                                      | 11.1189358372457 |                    |   | 0.420455331810947   |
| 4          | 217 | platelet activation                                                                       |                  |                    |   |                     |
| GO:0040036 |     | 0.000816491689859045                                                                      | 55.3961538461538 |                    |   | 0.0426268078333679  |
| 2          | 22  | regulation of fibroblast growth factor receptor signaling pathway                         |                  |                    |   |                     |
| GO:0051893 |     | 0.00105657514328283                                                                       | 48.1605351170569 |                    |   | 0.0484395543560999  |
| 2          | 25  | regulation of focal adhesion assembly                                                     |                  |                    |   |                     |
| GO:0090109 |     | 0.00105657514328283                                                                       | 48.1605351170569 |                    |   | 0.0484395543560999  |
| 2          | 25  | regulation of cell-substrate junction assembly                                            |                  |                    |   |                     |
| GO:0009266 |     | 0.00109970566046966                                                                       | 16.6834951456311 |                    |   | 0.205383710469864   |
| 3          | 106 | response to temperature stimulus                                                          |                  |                    |   |                     |
| GO:0071363 |     | 0.00157815493339972                                                                       | 9.07884615384615 |                    |   | 0.511521694000415   |
| 4          | 264 | cellular response to growth factor stimulus                                               |                  |                    |   |                     |
| GO:0070848 |     | 0.00203506583769419                                                                       | 8.44922341696535 |                    |   | 0.548335755311051   |
| 4          | 283 | response to growth factor stimulus                                                        |                  |                    |   |                     |
| GO:0043535 |     | 0.00218978410065928                                                                       | 32.5542986425339 |                    |   | 0.0697529582727839  |
| 2          | 36  | regulation of blood vessel endothelial cell migration                                     |                  |                    |   |                     |
| GO:0008543 |     | 0.0022957669888139                                                                        | 12.7961194029851 |                    |   | 0.265448757871428   |
| 3          | 137 | fibroblast growth factor receptor signaling pathway                                       |                  |                    |   |                     |
| GO:0010595 |     | 0.0026982209398674                                                                        | 29.1194331983806 |                    |   | 0.0775032869697599  |
| 2          | 40  | positive regulation of endothelial cell migration                                         |                  |                    |   |                     |
| GO:0002040 |     | 0.00297130648490636                                                                       | 27.6596153846154 |                    |   | 0.0813784513182479  |
| 2          | 42  | sprouting angiogenesis                                                                    |                  |                    |   |                     |
| GO:0048041 |     | 0.00297130648490636                                                                       | 27.6596153846154 |                    |   | 0.0813784513182479  |
| 2          | 42  | focal adhesion assembly                                                                   |                  |                    |   |                     |
| GO:0044344 |     | 0.00308196496660673                                                                       | 11.4958389261745 |                    |   | 0.294512490485088   |
| 3          | 152 | cellular response to fibroblast growth factor stimulus                                    |                  |                    |   |                     |
| GO:0071774 |     | 0.00308196496660673                                                                       | 11.4958389261745 |                    |   | 0.294512490485088   |
| 3          | 152 | response to fibroblast growth factor stimulus                                             |                  |                    |   |                     |
| GO:0043281 |     | 0.00381707674728929                                                                       | 10.6300621118012 |                    |   | 0.317763476576016   |
| 3          | 164 | regulation of cysteine-type endopeptidase activity involved in apoptotic process          |                  |                    |   |                     |
| GO:0010811 |     | 0.00402455770380558                                                                       | 23.5286415711948 |                    |   | 0.0949415265379558  |
| 2          | 49  | positive regulation of cell-substrate adhesion                                            |                  |                    |   |                     |
| GO:2000116 |     | 0.00415234104609564                                                                       | 10.306265060241  | 0.327451387447236  |   | 3                   |
| 169        |     | regulation of cysteine-type endopeptidase activity                                        |                  |                    |   |                     |
| GO:0002690 |     | 0.00418724208946625                                                                       | 23.036858974359  | 0.0968791087121998 |   | 2                   |
| 50         |     | positive regulation of leukocyte chemotaxis                                               |                  |                    |   |                     |
| GO:0043154 |     | 0.00522637642588173                                                                       | 20.468660968661  | 0.108504601757664  |   | 2                   |
| 56         |     | negative regulation of cysteine-type endopeptidase activity involved in apoptotic process |                  |                    |   |                     |
| GO:0001952 |     | 0.00540996391986441                                                                       | 20.0951048951049 |                    |   | 0.110442183931908   |
| 2          | 57  | regulation of cell-matrix adhesion                                                        |                  |                    |   |                     |
| GO:0007044 |     | 0.00540996391986441                                                                       | 20.0951048951049 |                    |   | 0.110442183931908   |
| 2          | 57  | cell-substrate junction assembly                                                          |                  |                    |   |                     |
| GO:0043534 |     | 0.00540996391986441                                                                       | 20.0951048951049 |                    |   | 0.110442183931908   |
| 2          | 57  | blood vessel endothelial cell migration                                                   |                  |                    |   |                     |
| GO:0002688 |     | 0.00559649222465406                                                                       | 19.7348901098901 |                    |   | 0.112379766106152   |
| 2          | 58  | regulation of leukocyte chemotaxis                                                        |                  |                    |   |                     |
| GO:2000117 |     | 0.00578595009340963                                                                       | 19.387314439946  | 0.114317348280396  |   | 2                   |
| 59         |     | negative regulation of cysteine-type endopeptidase activity                               |                  |                    |   |                     |
| GO:0017014 |     | 0.00580189185011537                                                                       | 267.055555555556 |                    |   | 0.00581274652273199 |
| 1          | 3   | protein nitrosylation                                                                     |                  |                    |   |                     |
| GO:0018119 |     | 0.00580189185011537                                                                       | 267.055555555556 |                    |   | 0.00581274652273199 |
| 1          | 3   | peptidyl-cysteine S-nitrosylation                                                         |                  |                    |   |                     |
| GO:0019682 |     | 0.00580189185011537                                                                       | 267.055555555556 |                    |   | 0.00581274652273199 |
| 1          | 3   | glyceraldehyde-3-phosphate metabolic process                                              |                  |                    |   |                     |
| GO:0038086 |     | 0.00580189185011537                                                                       | 267.055555555556 |                    |   | 0.00581274652273199 |
| 1          | 3   | VEGF-activated platelet-derived growth factor receptor signaling                          |                  |                    |   |                     |

STable4\_20PerPair

| pathway                                                          |                     |                                                                                                                       |                     |                   |      |                    |  |
|------------------------------------------------------------------|---------------------|-----------------------------------------------------------------------------------------------------------------------|---------------------|-------------------|------|--------------------|--|
| GO:0038091                                                       | 0.00580189185011537 | 267.0555555555556                                                                                                     | 0.00581274652273199 |                   |      |                    |  |
| 1                                                                | 3                   | positive regulation of cell proliferation by VEGF-activated platelet derived growth factor receptor signaling pathway |                     |                   |      |                    |  |
| GO:2001028                                                       | 0.00580189185011537 | 267.0555555555556                                                                                                     | 0.00581274652273199 |                   |      |                    |  |
| 1                                                                | 3                   | positive regulation of endothelial cell chemotaxis                                                                    |                     |                   |      |                    |  |
| GO:0002687                                                       | 0.00597832630913533 | 19.051724137931                                                                                                       | 0.11625493045464    | 2                 |      |                    |  |
| 60                                                               |                     | positive regulation of leukocyte migration                                                                            |                     |                   |      |                    |  |
| GO:0010594                                                       | 0.00762106028238352 | 16.7331002331002                                                                                                      | 0.131755587848592   |                   |      |                    |  |
| 2                                                                | 68                  | regulation of endothelial cell migration                                                                              |                     |                   |      |                    |  |
| GO:0006868                                                       | 0.00772863236978594 | 178.024691358025                                                                                                      | 0.00775032869697599 |                   |      |                    |  |
| 1                                                                | 4                   | glutamine transport                                                                                                   |                     |                   |      |                    |  |
| GO:0010748                                                       | 0.00772863236978594 | 178.024691358025                                                                                                      | 0.00775032869697599 |                   |      |                    |  |
| 1                                                                | 4                   | negative regulation of plasma membrane long-chain fatty acid transport                                                |                     |                   |      |                    |  |
| GO:0010757                                                       | 0.00772863236978594 | 178.024691358025                                                                                                      | 0.00775032869697599 |                   |      |                    |  |
| 1                                                                | 4                   | negative regulation of plasminogen activation                                                                         |                     |                   |      |                    |  |
| GO:0032914                                                       | 0.00772863236978594 | 178.024691358025                                                                                                      | 0.00775032869697599 |                   |      |                    |  |
| 1                                                                | 4                   | positive regulation of transforming growth factor beta1 production                                                    |                     |                   |      |                    |  |
| GO:0001936                                                       | 0.00806015101635253 | 16.2386877828054                                                                                                      | 0.13563075219708    |                   |      |                    |  |
| 2                                                                | 70                  | regulation of endothelial cell proliferation                                                                          |                     |                   |      |                    |  |
| GO:0050921                                                       | 0.00828389719599944 | 16.0022296544036                                                                                                      | 0.137568334371324   |                   |      |                    |  |
| 2                                                                | 71                  | positive regulation of chemotaxis                                                                                     |                     |                   |      |                    |  |
| GO:0001666                                                       | 0.00840043789092221 | 7.93004651162791                                                                                                      | 0.422392913985191   |                   |      |                    |  |
| 3                                                                | 218                 | response to hypoxia                                                                                                   |                     |                   |      |                    |  |
| GO:0036293                                                       | 0.00861263490302064 | 7.85585253456221                                                                                                      | 0.426268078333679   |                   |      |                    |  |
| 3                                                                | 220                 | response to decreased oxygen levels                                                                                   |                     |                   |      |                    |  |
| GO:0010746                                                       | 0.00965177200387202 | 133.509259259259                                                                                                      | 0.00968791087121998 |                   |      |                    |  |
| 1                                                                | 5                   | regulation of plasma membrane long-chain fatty acid transport                                                         |                     |                   |      |                    |  |
| GO:0031077                                                       | 0.00965177200387202 | 133.509259259259                                                                                                      | 0.00968791087121998 |                   |      |                    |  |
| 1                                                                | 5                   | post-embryonic camera-type eye development                                                                            |                     |                   |      |                    |  |
| GO:0038083                                                       | 0.00965177200387202 | 133.509259259259                                                                                                      | 0.00968791087121998 |                   |      |                    |  |
| 1                                                                | 5                   | peptidyl-tyrosine autophosphorylation                                                                                 |                     |                   |      |                    |  |
| GO:0043117                                                       | 0.00965177200387202 | 133.509259259259                                                                                                      | 0.00968791087121998 |                   |      |                    |  |
| 1                                                                | 5                   | positive regulation of vascular permeability                                                                          |                     |                   |      |                    |  |
| GO:0060753                                                       | 0.00965177200387202 | 133.509259259259                                                                                                      | 0.00968791087121998 |                   |      |                    |  |
| 1                                                                | 5                   | regulation of mast cell chemotaxis                                                                                    |                     |                   |      |                    |  |
| GO:0060754                                                       | 0.00965177200387202 | 133.509259259259                                                                                                      | 0.00968791087121998 |                   |      |                    |  |
| 1                                                                | 5                   | positive regulation of mast cell chemotaxis                                                                           |                     |                   |      |                    |  |
| GO:2001026                                                       | 0.00965177200387202 | 133.509259259259                                                                                                      | 0.00968791087121998 |                   |      |                    |  |
| 1                                                                | 5                   | regulation of endothelial cell chemotaxis                                                                             |                     |                   |      |                    |  |
| GO:0045766                                                       | 0.00992752501912228 | 14.5212550607287                                                                                                      | 0.151131409591032   |                   |      |                    |  |
| 2                                                                | 78                  | positive regulation of angiogenesis                                                                                   |                     |                   |      |                    |  |
| Tissue: whole_Blood=>Skin_Sun_Exposed_Lower_leg Type: asymmetric |                     |                                                                                                                       |                     |                   |      |                    |  |
| SourceGene: ENSG00000225196.1                                    |                     |                                                                                                                       |                     |                   |      |                    |  |
| TargetGeneSet: AMY2A KCNJ9 CENPF BUB1 HNRNPA1P24 TACC3 OCLN      |                     |                                                                                                                       |                     |                   |      |                    |  |
| LMNB1 KIF20A IMMP2L-IT1 RP11 CDK1 MKI67 DLGAP5 CTD KIF23         |                     |                                                                                                                       |                     |                   |      |                    |  |
| TOP2A RP1                                                        |                     |                                                                                                                       |                     |                   |      |                    |  |
| GOBPID                                                           | Pvalue              | OddsRatio                                                                                                             | ExpCount            | Count             | Size | Term               |  |
| GO:0000087                                                       |                     | 9.48956711965608e-07                                                                                                  | 26.5197740112994    |                   |      | 0.373676562175628  |  |
| 6                                                                | 360                 | M phase of mitotic cell cycle                                                                                         |                     |                   |      |                    |  |
| GO:0007017                                                       |                     | 1.58315647546335e-06                                                                                                  | 24.2015503875969    |                   |      | 0.407930247041727  |  |
| 6                                                                | 393                 | microtubule-based process                                                                                             |                     |                   |      |                    |  |
| GO:0010564                                                       |                     | 2.14314006566758e-06                                                                                                  | 22.921568627451     | 0.429728046501972 |      | 6                  |  |
| 414                                                              |                     | regulation of cell cycle process                                                                                      |                     |                   |      |                    |  |
| GO:0051301                                                       |                     | 3.5662306932291e-06                                                                                                   | 20.9118086696562    |                   |      | 0.469171683620511  |  |
| 6                                                                | 452                 | cell division                                                                                                         |                     |                   |      |                    |  |
| GO:0010389                                                       |                     | 3.61224493267115e-06                                                                                                  | 133.416666666667    |                   |      | 0.0311397135146357 |  |
| 3                                                                | 30                  | regulation of G2/M transition of mitotic cell cycle                                                                   |                     |                   |      |                    |  |
| GO:0000226                                                       |                     | 5.55086977687262e-06                                                                                                  | 26.8409090909091    |                   |      | 0.279219431181233  |  |
| 5                                                                | 269                 | microtubule cytoskeleton organization                                                                                 |                     |                   |      |                    |  |
| GO:0007346                                                       |                     | 9.90879614328105e-06                                                                                                  | 23.7214765100671    |                   |      | 0.31451110649782   |  |
| 5                                                                | 303                 | regulation of mitotic cell cycle                                                                                      |                     |                   |      |                    |  |



Stable4\_20PerPair

|            |                      |                                                              |                    |   |     |
|------------|----------------------|--------------------------------------------------------------|--------------------|---|-----|
| GO:0007093 | 1.0305623562036e-05  | 38.5212121212121                                             | 0.144280672617812  |   |     |
| 4          | 139                  | mitotic cell cycle checkpoint                                |                    |   |     |
| GO:0007059 | 1.06022401963643e-05 | 38.2352941176471                                             | 0.1453186630683    | 4 |     |
| 140        |                      | chromosome segregation                                       |                    |   |     |
| GO:0030071 | 1.08913549185673e-05 | 89.975                                                       | 0.0446335893709778 | 3 | 43  |
|            |                      | regulation of mitotic metaphase/anaphase transition          |                    |   |     |
| GO:0007091 | 1.25075550389255e-05 | 85.6785714285714                                             | 0.0467095702719535 |   |     |
| 3          | 45                   | mitotic metaphase/anaphase transition                        |                    |   |     |
| GO:0000280 | 1.99136320865947e-05 | 20.4217391304348                                             | 0.363296657670749  |   |     |
| 5          | 350                  | nuclear division                                             |                    |   |     |
| GO:0007067 | 1.99136320865947e-05 | 20.4217391304348                                             | 0.363296657670749  |   |     |
| 5          | 350                  | mitosis                                                      |                    |   |     |
| GO:0048285 | 2.60259821483528e-05 | 19.2753424657534                                             | 0.384056466680507  |   |     |
| 5          | 370                  | organelle fission                                            |                    |   |     |
| GO:0006921 | 5.38727986489396e-05 | 51.3071428571429                                             | 0.0757733028856135 |   |     |
| 3          | 73                   | cellular component disassembly involved in apoptotic process |                    |   |     |
| GO:0071780 | 5.5013756314794e-05  | 246.615384615385                                             | 0.0114178949553664 |   |     |
| 2          | 11                   | mitotic cell cycle G2/M transition checkpoint                |                    |   |     |
| GO:0000075 | 9.05617880368276e-05 | 21.6928953399542                                             | 0.251193689018061  |   |     |
| 4          | 242                  | cell cycle checkpoint                                        |                    |   |     |
| GO:0007088 | 9.41657073479172e-05 | 42.2088235294118                                             | 0.0913431596429313 |   |     |
| 3          | 88                   | regulation of mitosis                                        |                    |   |     |
| GO:0051783 | 9.41657073479172e-05 | 42.2088235294118                                             | 0.0913431596429313 |   |     |
| 3          | 88                   | regulation of nuclear division                               |                    |   |     |
| GO:0071156 | 0.000126805278921584 | 19.8265734265734                                             | 0.274029478928794  |   |     |
| 4          | 264                  | regulation of cell cycle arrest                              |                    |   |     |
| GO:0050000 | 0.000208796395273854 | 116.736842105263                                             | 0.021797799460245  |   |     |
| 2          | 21                   | chromosome localization                                      |                    |   |     |
| GO:0051303 | 0.000208796395273854 | 116.736842105263                                             | 0.021797799460245  |   |     |
| 2          | 21                   | establishment of chromosome localization                     |                    |   |     |
| GO:0001578 | 0.000347734809616318 | 88.6830769230769                                             | 0.0280257421631721 |   |     |
| 2          | 27                   | microtubule bundle formation                                 |                    |   |     |
| GO:0007018 | 0.000387608331108328 | 25.7140287769784                                             | 0.147394643969275  |   |     |
| 3          | 142                  | microtubule-based movement                                   |                    |   |     |
| GO:0000086 | 0.000403833428618816 | 25.3457446808511                                             | 0.149470624870251  |   |     |
| 3          | 144                  | G2/M transition of mitotic cell cycle                        |                    |   |     |
| GO:2000602 | 0.000428983149259857 | 24.8125                                                      | 0.152584596221715  | 3 | 147 |
|            |                      | regulation of interphase of mitotic cell cycle               |                    |   |     |
| GO:0030261 | 0.000430178861301616 | 79.1648351648352                                             | 0.0311397135146357 |   |     |
| 2          | 30                   | chromosome condensation                                      |                    |   |     |
| GO:0051640 | 0.000455122075835866 | 24.3010204081633                                             | 0.155698567573178  |   |     |
| 3          | 150                  | organelle localization                                       |                    |   |     |
| GO:0007050 | 0.000456665420313837 | 14.0184308841843                                             | 0.383018476230019  |   |     |
| 4          | 369                  | cell cycle arrest                                            |                    |   |     |
| GO:0007094 | 0.000521209766007249 | 71.4888337468983                                             | 0.0342536848660992 |   |     |
| 2          | 33                   | mitotic cell cycle spindle assembly checkpoint               |                    |   |     |
| GO:0071173 | 0.000553453451453472 | 69.25                                                        | 0.0352916753165871 | 2 | 34  |
|            |                      | spindle assembly checkpoint                                  |                    |   |     |
| GO:0045841 | 0.000586644262671061 | 67.1468531468531                                             | 0.0363296657670749 |   |     |
| 2          | 35                   | negative regulation of mitotic metaphase/anaphase transition |                    |   |     |
| GO:0071174 | 0.000620780463234249 | 65.1674208144796                                             | 0.0373676562175628 |   |     |
| 2          | 36                   | mitotic cell cycle spindle checkpoint                        |                    |   |     |
| GO:0031576 | 0.000766744506681834 | 58.2914979757085                                             | 0.0415196180195142 |   |     |
| 2          | 40                   | G2/M transition checkpoint                                   |                    |   |     |
| GO:0045839 | 0.000766744506681834 | 58.2914979757085                                             | 0.0415196180195142 |   |     |
| 2          | 40                   | negative regulation of mitosis                               |                    |   |     |
| GO:0051784 | 0.000766744506681834 | 58.2914979757085                                             | 0.0415196180195142 |   |     |
| 2          | 40                   | negative regulation of nuclear division                      |                    |   |     |
| GO:0031577 | 0.000845353877431115 | 55.3692307692308                                             | 0.0435955989204899 |   |     |
| 2          | 42                   | spindle checkpoint                                           |                    |   |     |
| GO:0045786 | 0.000863583540872574 | 11.7598152424942                                             | 0.453601826863193  |   |     |
| 4          | 437                  | negative regulation of cell cycle                            |                    |   |     |
| GO:0000819 | 0.0012941241237902   | 44.2646153846154                                             | 0.0539755034253685 |   |     |

STable4\_20PerPair

|            |     |                                                  |                  |                     |                     |     |
|------------|-----|--------------------------------------------------|------------------|---------------------|---------------------|-----|
| 2          | 52  | sister chromatid segregation                     |                  |                     |                     |     |
| GO:0031100 |     | 0.0012941241237902                               | 44.2646153846154 |                     | 0.0539755034253685  |     |
| 2          | 52  | organ regeneration                               |                  |                     |                     |     |
| GO:0006260 |     | 0.00243276797566254                              | 13.3688679245283 |                     | 0.278181440730745   |     |
| 3          | 268 | DNA replication                                  |                  |                     |                     |     |
| GO:0071845 |     | 0.00286802235507748                              | 12.5934163701068 |                     | 0.294789287938551   |     |
| 3          | 284 | cellular component disassembly at cellular level |                  |                     |                     |     |
| GO:0022411 |     | 0.00298389037380053                              | 12.4131578947368 |                     | 0.298941249740502   |     |
| 3          | 288 | cellular component disassembly                   |                  |                     |                     |     |
| GO:0007051 |     | 0.00303273524619927                              | 28.3195266272189 |                     | 0.0830392360390284  |     |
| 2          | 80  | spindle organization                             |                  |                     |                     |     |
| GO:0014038 |     | 0.00311095525981198                              | 515.5            | 0.00311397135146357 | 1                   | 3   |
|            |     | regulation of schwann cell differentiation       |                  |                     |                     |     |
| GO:0030263 |     | 0.00311095525981198                              | 515.5            | 0.00311397135146357 | 1                   | 3   |
|            |     | apoptotic chromosome condensation                |                  |                     |                     |     |
| GO:0030953 |     | 0.00311095525981198                              | 515.5            | 0.00311397135146357 | 1                   | 3   |
|            |     | astral microtubule organization                  |                  |                     |                     |     |
| GO:0035845 |     | 0.00311095525981198                              | 515.5            | 0.00311397135146357 | 1                   | 3   |
|            |     | photoreceptor cell outer segment organization    |                  |                     |                     |     |
| GO:0051305 |     | 0.00311095525981198                              | 515.5            | 0.00311397135146357 | 1                   | 3   |
|            |     | chromosome movement towards spindle pole         |                  |                     |                     |     |
| GO:0016202 |     | 0.00326008654118065                              | 27.2649572649573 |                     | 0.086153207390492   |     |
| 2          | 83  | regulation of striated muscle tissue development |                  |                     |                     |     |
| GO:0000236 |     | 0.00341597961863128                              | 26.6042632066728 |                     | 0.0882291882914677  |     |
| 2          | 85  | mitotic prometaphase                             |                  |                     |                     |     |
| GO:0048634 |     | 0.00341597961863128                              | 26.6042632066728 |                     | 0.0882291882914677  |     |
| 2          | 85  | regulation of muscle organ development           |                  |                     |                     |     |
| GO:0070925 |     | 0.00407387402393737                              | 24.2519019442096 |                     | 0.0965331118953706  |     |
| 2          | 93  | organelle assembly                               |                  |                     |                     |     |
| GO:0051256 |     | 0.00414593142752384                              | 343.642857142857 |                     | 0.00415196180195142 |     |
| 1          | 4   | spindle midzone assembly involved in mitosis     |                  |                     |                     |     |
| GO:0000910 |     | 0.00415994530842383                              | 23.9866220735786 |                     | 0.0975711023458584  |     |
| 2          | 94  | cytokinesis                                      |                  |                     |                     |     |
| GO:0010948 |     | 0.00433462643898035                              | 23.4729950900164 |                     | 0.0996470832468341  |     |
| 2          | 96  | negative regulation of cell cycle process        |                  |                     |                     |     |
| GO:0042493 |     | 0.00460505766649717                              | 10.5878378378378 |                     | 0.348764791363919   |     |
| 3          | 336 | response to drug                                 |                  |                     |                     |     |
| GO:0051656 |     | 0.00478606257485682                              | 22.2797202797203 |                     | 0.104837035499273   |     |
| 2          | 101 | establishment of organelle localization          |                  |                     |                     |     |
| GO:0045787 |     | 0.00487886269765889                              | 22.0553846153846 |                     | 0.105875025949761   |     |
| 2          | 102 | positive regulation of cell cycle                |                  |                     |                     |     |
| GO:0044245 |     | 0.00517990464193407                              | 257.714285714286 |                     | 0.00518995225243928 |     |
| 1          | 5   | polysaccharide digestion                         |                  |                     |                     |     |
| GO:0051255 |     | 0.00517990464193407                              | 257.714285714286 |                     | 0.00518995225243928 |     |
| 1          | 5   | spindle midzone assembly                         |                  |                     |                     |     |
| GO:0000244 |     | 0.00621287580560359                              | 206.157142857143 |                     | 0.00622794270292713 |     |
| 1          | 6   | assembly of spliceosomal tri-snRNP               |                  |                     |                     |     |
| GO:0034501 |     | 0.00621287580560359                              | 206.157142857143 |                     | 0.00622794270292713 |     |
| 1          | 6   | protein localization to kinetochores             |                  |                     |                     |     |
| GO:0046498 |     | 0.00621287580560359                              | 206.157142857143 |                     | 0.00622794270292713 |     |
| 1          | 6   | S-adenosylhomocysteine metabolic process         |                  |                     |                     |     |
| GO:0046548 |     | 0.00621287580560359                              | 206.157142857143 |                     | 0.00622794270292713 |     |
| 1          | 6   | retinal rod cell development                     |                  |                     |                     |     |
| GO:0042306 |     | 0.00626490232608711                              | 19.3279352226721 |                     | 0.120406892256591   |     |
| 2          | 116 | regulation of protein import into nucleus        |                  |                     |                     |     |
| GO:1900180 |     | 0.00626490232608711                              | 19.3279352226721 |                     | 0.120406892256591   |     |
| 2          | 116 | regulation of protein localization to nucleus    |                  |                     |                     |     |
| GO:0051329 |     | 0.00644008806096661                              | 9.34840425531915 |                     | 0.393398380734897   |     |
| 3          | 379 | interphase of mitotic cell cycle                 |                  |                     |                     |     |
| GO:0051325 |     | 0.00682344901783071                              | 9.1484375        | 0.4017023043388     | 3                   | 387 |
|            |     | interphase                                       |                  |                     |                     |     |
| GO:0031099 |     | 0.0069078784347415                               | 18.3538461538462 |                     | 0.126634834959518   |     |
| 2          | 122 | regeneration                                     |                  |                     |                     |     |

Stable4\_20PerPair

|                                                                                    |                                                 |                                                                   |                         |
|------------------------------------------------------------------------------------|-------------------------------------------------|-------------------------------------------------------------------|-------------------------|
| GO:0000712                                                                         | 0.00724484582034324                             | 171.785714285714                                                  | 0.00726593315341499     |
| 1                                                                                  | 7                                               | resolution of meiotic recombination intermediates                 |                         |
| GO:0007095                                                                         | 0.00724484582034324                             | 171.785714285714                                                  | 0.00726593315341499     |
| 1                                                                                  | 7                                               | mitotic cell cycle G2/M transition DNA damage checkpoint          |                         |
| GO:0022027                                                                         | 0.00724484582034324                             | 171.785714285714                                                  | 0.00726593315341499     |
| 1                                                                                  | 7                                               | interkinetic nuclear migration                                    |                         |
| GO:0040016                                                                         | 0.00724484582034324                             | 171.785714285714                                                  | 0.00726593315341499     |
| 1                                                                                  | 7                                               | embryonic cleavage                                                |                         |
| GO:0045091                                                                         | 0.00724484582034324                             | 171.785714285714                                                  | 0.00726593315341499     |
| 1                                                                                  | 7                                               | regulation of retroviral genome replication                       |                         |
| GO:0045842                                                                         | 0.00724484582034324                             | 171.785714285714                                                  | 0.00726593315341499     |
| 1                                                                                  | 7                                               | positive regulation of mitotic metaphase/anaphase transition      |                         |
| GO:0046500                                                                         | 0.00724484582034324                             | 171.785714285714                                                  | 0.00726593315341499     |
| 1                                                                                  | 7                                               | S-adenosylmethionine metabolic process                            |                         |
| GO:0051307                                                                         | 0.00724484582034324                             | 171.785714285714                                                  | 0.00726593315341499     |
| 1                                                                                  | 7                                               | meiotic chromosome separation                                     |                         |
| GO:0071107                                                                         | 0.00724484582034324                             | 171.785714285714                                                  | 0.00726593315341499     |
| 1                                                                                  | 7                                               | response to parathyroid hormone stimulus                          |                         |
| GO:0042670                                                                         | 0.00827581558721535                             | 147.234693877551                                                  | 0.00830392360390284     |
| 1                                                                                  | 8                                               | retinal cone cell differentiation                                 |                         |
| GO:0046549                                                                         | 0.00827581558721535                             | 147.234693877551                                                  | 0.00830392360390284     |
| 1                                                                                  | 8                                               | retinal cone cell development                                     |                         |
| GO:0046822                                                                         | 0.00864097099710074                             | 16.2974358974359                                                  | 0.142204691716836       |
| 2                                                                                  | 137                                             | regulation of nucleocytoplasmic transport                         |                         |
| GO:0033157                                                                         | 0.00900879715509991                             | 15.9397993311037                                                  | 0.1453186630683 2       |
| 140                                                                                |                                                 | regulation of intracellular protein transport                     |                         |
| GO:0006265                                                                         | 0.00930578600653176                             | 128.821428571429                                                  | 0.0093419140543907      |
| 1                                                                                  | 9                                               | DNA topological change                                            |                         |
| GO:0033160                                                                         | 0.00930578600653176                             | 128.821428571429                                                  | 0.0093419140543907      |
| 1                                                                                  | 9                                               | positive regulation of protein import into nucleus, translocation |                         |
| GO:0035082                                                                         | 0.00930578600653176                             | 128.821428571429                                                  | 0.0093419140543907      |
| 1                                                                                  | 9                                               | axoneme assembly                                                  |                         |
| GO:0045090                                                                         | 0.00930578600653176                             | 128.821428571429                                                  | 0.0093419140543907      |
| 1                                                                                  | 9                                               | retroviral genome replication                                     |                         |
| GO:0033043                                                                         | 0.0097705449191423                              | 7.98972602739726                                                  | 0.457753788665144       |
| 3                                                                                  | 441                                             | regulation of organelle organization                              |                         |
| Tissue: whole_Blood=>Skin_Sun_Exposed_Lower_leg                                    | Type:                                           | asymmetric                                                        |                         |
| SourceGene:                                                                        | ENSG00000225231.1                               |                                                                   |                         |
| TargetGeneSet:                                                                     | ST7L NCKAP1 CTNNB1 PCCB SEPT11 RP11 RXRB UNC5B  |                                                                   |                         |
| FRA10AC1                                                                           | SCD ZCCHC8 C14orf64 LMAN1L RPL9P9 APOBR HSD17B2 |                                                                   |                         |
| DBNDD1 ATP5A1                                                                      | CTIF ZNF44 ZNF418 PXMP4 CLDN14 COMT SUN2 VGLL1  |                                                                   |                         |
| GOBPID Pvalue                                                                      | OddsRatio ExpCount Count Size Term              |                                                                   |                         |
| GO:0051176                                                                         | 6.02870325080865e-06                            | 1518.84210526316                                                  | 0.00435955989204899     |
| 2                                                                                  | 3                                               | positive regulation of sulfur metabolic process                   |                         |
| GO:0042762                                                                         | 1.20468370280895e-05                            | 759.368421052632                                                  | 0.00581274652273199     |
| 2                                                                                  | 4                                               | regulation of sulfur metabolic process                            |                         |
| GO:0033002                                                                         | 0.000335926851389223                            | 25.9746376811594                                                  | 0.138052729914885       |
| 3                                                                                  | 95                                              | muscle cell proliferation                                         |                         |
| GO:0008210                                                                         | 0.000415403080031183                            | 79.8393351800554                                                  | 0.030516919244343       |
| 2                                                                                  | 21                                              | estrogen metabolic process                                        |                         |
| GO:0048660                                                                         | 0.00384061820742735                             | 24.3938879456706                                                  | 0.0930039443637119      |
| 2                                                                                  | 64                                              | regulation of smooth muscle cell proliferation                    |                         |
| GO:0048659                                                                         | 0.00420107984164143                             | 23.2631578947368                                                  | 0.0973635042557608      |
| 2                                                                                  | 67                                              | smooth muscle cell proliferation                                  |                         |
| GO:0003136                                                                         | 0.00435352854395898                             | 360.7                                                             | 0.00435955989204899 1 3 |
| negative regulation of heart induction by canonical wnt receptor signaling pathway |                                                 |                                                                   |                         |
| GO:0009997                                                                         | 0.00435352854395898                             | 360.7                                                             | 0.00435955989204899 1 3 |
| negative regulation of cardioblast cell fate specification                         |                                                 |                                                                   |                         |
| GO:0033239                                                                         | 0.00435352854395898                             | 360.7                                                             | 0.00435955989204899 1 3 |
| negative regulation of cellular amine metabolic process                            |                                                 |                                                                   |                         |
| GO:0036022                                                                         | 0.00435352854395898                             | 360.7                                                             | 0.00435955989204899 1 3 |
| limb joint morphogenesis                                                           |                                                 |                                                                   |                         |
| GO:0036023                                                                         | 0.00435352854395898                             | 360.7                                                             | 0.00435955989204899 1 3 |

STable4\_20PerPair

|                                                                                   |                     |                  |                     |   |   |
|-----------------------------------------------------------------------------------|---------------------|------------------|---------------------|---|---|
| embryonic skeletal limb joint morphogenesis                                       |                     |                  |                     |   |   |
| GO:0042684                                                                        | 0.00435352854395898 | 360.7            | 0.00435955989204899 | 1 | 3 |
| cardioblast cell fate commitment                                                  |                     |                  |                     |   |   |
| GO:0042685                                                                        | 0.00435352854395898 | 360.7            | 0.00435955989204899 | 1 | 3 |
| cardioblast cell fate specification                                               |                     |                  |                     |   |   |
| GO:0042686                                                                        | 0.00435352854395898 | 360.7            | 0.00435955989204899 | 1 | 3 |
| regulation of cardioblast cell fate specification                                 |                     |                  |                     |   |   |
| GO:0043578                                                                        | 0.00435352854395898 | 360.7            | 0.00435955989204899 | 1 | 3 |
| nuclear matrix organization                                                       |                     |                  |                     |   |   |
| GO:0060066                                                                        | 0.00435352854395898 | 360.7            | 0.00435955989204899 | 1 | 3 |
| oviduct development                                                               |                     |                  |                     |   |   |
| GO:0060423                                                                        | 0.00435352854395898 | 360.7            | 0.00435955989204899 | 1 | 3 |
| foregut regionalization                                                           |                     |                  |                     |   |   |
| GO:0060424                                                                        | 0.00435352854395898 | 360.7            | 0.00435955989204899 | 1 | 3 |
| lung field specification                                                          |                     |                  |                     |   |   |
| GO:0060492                                                                        | 0.00435352854395898 | 360.7            | 0.00435955989204899 | 1 | 3 |
| lung induction                                                                    |                     |                  |                     |   |   |
| GO:0061197                                                                        | 0.00435352854395898 | 360.7            | 0.00435955989204899 | 1 | 3 |
| fungiform papilla morphogenesis                                                   |                     |                  |                     |   |   |
| GO:0061198                                                                        | 0.00435352854395898 | 360.7            | 0.00435955989204899 | 1 | 3 |
| fungiform papilla formation                                                       |                     |                  |                     |   |   |
| GO:0070602                                                                        | 0.00435352854395898 | 360.7            | 0.00435955989204899 | 1 | 3 |
| regulation of centromeric sister chromatid cohesion                               |                     |                  |                     |   |   |
| GO:0090292                                                                        | 0.00435352854395898 | 360.7            | 0.00435955989204899 | 1 | 3 |
| nuclear matrix anchoring at nuclear membrane                                      |                     |                  |                     |   |   |
| GO:1901099                                                                        | 0.00435352854395898 | 360.7            | 0.00435955989204899 | 1 | 3 |
| negative regulation of signal transduction in absence of ligand                   |                     |                  |                     |   |   |
| GO:1901320                                                                        | 0.00435352854395898 | 360.7            | 0.00435955989204899 | 1 | 3 |
| negative regulation of heart induction                                            |                     |                  |                     |   |   |
| GO:2000017                                                                        | 0.00435352854395898 | 360.7            | 0.00435955989204899 | 1 | 3 |
| positive regulation of determination of dorsal identity                           |                     |                  |                     |   |   |
| GO:2000044                                                                        | 0.00435352854395898 | 360.7            | 0.00435955989204899 | 1 | 3 |
| negative regulation of cardiac cell fate specification                            |                     |                  |                     |   |   |
| GO:2001240                                                                        | 0.00435352854395898 | 360.7            | 0.00435955989204899 | 1 | 3 |
| negative regulation of extrinsic apoptotic signaling pathway in absence of ligand |                     |                  |                     |   |   |
| GO:0035051                                                                        | 0.00537282938892435 | 20.4210526315789 | 0.110442183931908   |   |   |
| cardiac cell differentiation                                                      |                     |                  |                     |   |   |
| GO:0006172                                                                        | 0.00580068911293552 | 240.45           | 0.00581274652273199 | 1 | 4 |
| ADP biosynthetic process                                                          |                     |                  |                     |   |   |
| GO:0009136                                                                        | 0.00580068911293552 | 240.45           | 0.00581274652273199 | 1 | 4 |
| purine nucleoside diphosphate biosynthetic process                                |                     |                  |                     |   |   |
| GO:0009180                                                                        | 0.00580068911293552 | 240.45           | 0.00581274652273199 | 1 | 4 |
| purine ribonucleoside diphosphate biosynthetic process                            |                     |                  |                     |   |   |
| GO:0009188                                                                        | 0.00580068911293552 | 240.45           | 0.00581274652273199 | 1 | 4 |
| ribonucleoside diphosphate biosynthetic process                                   |                     |                  |                     |   |   |
| GO:0010457                                                                        | 0.00580068911293552 | 240.45           | 0.00581274652273199 | 1 | 4 |
| centriole-centriole cohesion                                                      |                     |                  |                     |   |   |
| GO:0014045                                                                        | 0.00580068911293552 | 240.45           | 0.00581274652273199 | 1 | 4 |
| establishment of endothelial blood-brain barrier                                  |                     |                  |                     |   |   |
| GO:0022009                                                                        | 0.00580068911293552 | 240.45           | 0.00581274652273199 | 1 | 4 |
| central nervous system vasculogenesis                                             |                     |                  |                     |   |   |
| GO:0042420                                                                        | 0.00580068911293552 | 240.45           | 0.00581274652273199 | 1 | 4 |
| dopamine catabolic process                                                        |                     |                  |                     |   |   |
| GO:0060789                                                                        | 0.00580068911293552 | 240.45           | 0.00581274652273199 | 1 | 4 |
| hair follicle placode formation                                                   |                     |                  |                     |   |   |
| GO:0060912                                                                        | 0.00580068911293552 | 240.45           | 0.00581274652273199 | 1 | 4 |
| cardiac cell fate specification                                                   |                     |                  |                     |   |   |
| GO:0060916                                                                        | 0.00580068911293552 | 240.45           | 0.00581274652273199 | 1 | 4 |
| mesenchymal cell proliferation involved in lung development                       |                     |                  |                     |   |   |
| GO:0061196                                                                        | 0.00580068911293552 | 240.45           | 0.00581274652273199 | 1 | 4 |
| fungiform papilla development                                                     |                     |                  |                     |   |   |
| GO:0061316                                                                        | 0.00580068911293552 | 240.45           | 0.00581274652273199 | 1 | 4 |
| canonical wnt receptor signaling pathway involved in heart development            |                     |                  |                     |   |   |

Stable4\_20PerPair

|                                                                                       |                     |                  |                     |   |   |
|---------------------------------------------------------------------------------------|---------------------|------------------|---------------------|---|---|
| GO:0061325                                                                            | 0.00580068911293552 | 240.45           | 0.00581274652273199 | 1 | 4 |
| cell proliferation involved in outflow tract morphogenesis                            |                     |                  |                     |   |   |
| GO:0070601                                                                            | 0.00580068911293552 | 240.45           | 0.00581274652273199 | 1 | 4 |
| centromeric sister chromatid cohesion                                                 |                     |                  |                     |   |   |
| GO:2000015                                                                            | 0.00580068911293552 | 240.45           | 0.00581274652273199 | 1 | 4 |
| regulation of determination of dorsal identity                                        |                     |                  |                     |   |   |
| GO:2000043                                                                            | 0.00580068911293552 | 240.45           | 0.00581274652273199 | 1 | 4 |
| regulation of cardiac cell fate specification                                         |                     |                  |                     |   |   |
| GO:2000136                                                                            | 0.00580068911293552 | 240.45           | 0.00581274652273199 | 1 | 4 |
| regulation of cell proliferation involved in heart morphogenesis                      |                     |                  |                     |   |   |
| GO:0008202                                                                            | 0.00696376315929654 | 8.70787207872079 | 0.398173136807141   |   |   |
| 3 274 steroid metabolic process                                                       |                     |                  |                     |   |   |
| GO:0007097                                                                            | 0.00724584627557323 | 180.325          | 0.00726593315341499 | 1 | 5 |
| nuclear migration                                                                     |                     |                  |                     |   |   |
| GO:0019614                                                                            | 0.00724584627557323 | 180.325          | 0.00726593315341499 | 1 | 5 |
| catechol-containing compound catabolic process                                        |                     |                  |                     |   |   |
| GO:0019626                                                                            | 0.00724584627557323 | 180.325          | 0.00726593315341499 | 1 | 5 |
| short-chain fatty acid catabolic process                                              |                     |                  |                     |   |   |
| GO:0034313                                                                            | 0.00724584627557323 | 180.325          | 0.00726593315341499 | 1 | 5 |
| diol catabolic process                                                                |                     |                  |                     |   |   |
| GO:0035117                                                                            | 0.00724584627557323 | 180.325          | 0.00726593315341499 | 1 | 5 |
| embryonic arm morphogenesis                                                           |                     |                  |                     |   |   |
| GO:0035140                                                                            | 0.00724584627557323 | 180.325          | 0.00726593315341499 | 1 | 5 |
| arm morphogenesis                                                                     |                     |                  |                     |   |   |
| GO:0038034                                                                            | 0.00724584627557323 | 180.325          | 0.00726593315341499 | 1 | 5 |
| signal transduction in absence of ligand                                              |                     |                  |                     |   |   |
| GO:0042424                                                                            | 0.00724584627557323 | 180.325          | 0.00726593315341499 | 1 | 5 |
| catecholamine catabolic process                                                       |                     |                  |                     |   |   |
| GO:0044340                                                                            | 0.00724584627557323 | 180.325          | 0.00726593315341499 | 1 | 5 |
| canonical wnt receptor signaling pathway involved in regulation of cell proliferation |                     |                  |                     |   |   |
| GO:0045764                                                                            | 0.00724584627557323 | 180.325          | 0.00726593315341499 | 1 | 5 |
| positive regulation of cellular amino acid metabolic process                          |                     |                  |                     |   |   |
| GO:0060431                                                                            | 0.00724584627557323 | 180.325          | 0.00726593315341499 | 1 | 5 |
| primary lung bud formation                                                            |                     |                  |                     |   |   |
| GO:0060856                                                                            | 0.00724584627557323 | 180.325          | 0.00726593315341499 | 1 | 5 |
| establishment of blood-brain barrier                                                  |                     |                  |                     |   |   |
| GO:0061046                                                                            | 0.00724584627557323 | 180.325          | 0.00726593315341499 | 1 | 5 |
| regulation of branching involved in lung morphogenesis                                |                     |                  |                     |   |   |
| GO:0071680                                                                            | 0.00724584627557323 | 180.325          | 0.00726593315341499 | 1 | 5 |
| response to indole-3-methanol                                                         |                     |                  |                     |   |   |
| GO:0071681                                                                            | 0.00724584627557323 | 180.325          | 0.00726593315341499 | 1 | 5 |
| cellular response to indole-3-methanol                                                |                     |                  |                     |   |   |
| GO:0090286                                                                            | 0.00724584627557323 | 180.325          | 0.00726593315341499 | 1 | 5 |
| cytoskeletal anchoring at nuclear membrane                                            |                     |                  |                     |   |   |
| GO:0097192                                                                            | 0.00724584627557323 | 180.325          | 0.00726593315341499 | 1 | 5 |
| extrinsic apoptotic signaling pathway in absence of ligand                            |                     |                  |                     |   |   |
| GO:2001239                                                                            | 0.00724584627557323 | 180.325          | 0.00726593315341499 | 1 | 5 |
| regulation of extrinsic apoptotic signaling pathway in absence of ligand              |                     |                  |                     |   |   |
| GO:0032526                                                                            | 0.00729915945075009 | 17.3539019963702 | 0.129333610130787   |   |   |
| 2 89 response to retinoic acid                                                        |                     |                  |                     |   |   |
| GO:0032507                                                                            | 0.00827901156141599 | 16.2275042444822 | 0.138052729914885   |   |   |
| 2 95 maintenance of protein location in cell                                          |                     |                  |                     |   |   |
| GO:0000244                                                                            | 0.00868900266683825 | 144.25           | 0.00871911978409799 | 1 | 6 |
| assembly of spliceosomal tri-snRNP                                                    |                     |                  |                     |   |   |
| GO:0003159                                                                            | 0.00868900266683825 | 144.25           | 0.00871911978409799 | 1 | 6 |
| morphogenesis of an endothelium                                                       |                     |                  |                     |   |   |
| GO:0003263                                                                            | 0.00868900266683825 | 144.25           | 0.00871911978409799 | 1 | 6 |
| cardioblast proliferation                                                             |                     |                  |                     |   |   |
| GO:0009133                                                                            | 0.00868900266683825 | 144.25           | 0.00871911978409799 | 1 | 6 |
| nucleoside diphosphate biosynthetic process                                           |                     |                  |                     |   |   |
| GO:0035315                                                                            | 0.00868900266683825 | 144.25           | 0.00871911978409799 | 1 | 6 |
| hair cell differentiation                                                             |                     |                  |                     |   |   |

Stable4\_20PerPair

|                                                                                                                                 |                         |                  |                     |                   |          |                     |          |          |       |
|---------------------------------------------------------------------------------------------------------------------------------|-------------------------|------------------|---------------------|-------------------|----------|---------------------|----------|----------|-------|
| GO:0046031                                                                                                                      | 0.00868900266683825     | 144.25           | 0.00871911978409799 | 1                 | 6        |                     |          |          |       |
| ADP metabolic process                                                                                                           |                         |                  |                     |                   |          |                     |          |          |       |
| GO:0060439                                                                                                                      | 0.00868900266683825     | 144.25           | 0.00871911978409799 | 1                 | 6        |                     |          |          |       |
| trachea morphogenesis                                                                                                           |                         |                  |                     |                   |          |                     |          |          |       |
| GO:0061154                                                                                                                      | 0.00868900266683825     | 144.25           | 0.00871911978409799 | 1                 | 6        |                     |          |          |       |
| endothelial tube morphogenesis                                                                                                  |                         |                  |                     |                   |          |                     |          |          |       |
| GO:0061323                                                                                                                      | 0.00868900266683825     | 144.25           | 0.00871911978409799 | 1                 | 6        |                     |          |          |       |
| cell proliferation involved in heart morphogenesis                                                                              |                         |                  |                     |                   |          |                     |          |          |       |
| GO:0090381                                                                                                                      | 0.00868900266683825     | 144.25           | 0.00871911978409799 | 1                 | 6        |                     |          |          |       |
| regulation of heart induction                                                                                                   |                         |                  |                     |                   |          |                     |          |          |       |
| GO:0034754                                                                                                                      | 0.00913836677595833     | 15.3941997851772 |                     | 0.1453186630683   | 2        |                     |          |          |       |
| 100 cellular hormone metabolic process                                                                                          |                         |                  |                     |                   |          |                     |          |          |       |
| GO:0033189                                                                                                                      | 0.00949287242636354     | 15.0842105263158 |                     | 0.148225036329666 |          |                     |          |          |       |
| 2 102 response to vitamin A                                                                                                     |                         |                  |                     |                   |          |                     |          |          |       |
| Tissue: Skin_Sun_Exposed_Lower_leg=>whole_Blood Type:                                                                           |                         |                  |                     | asymmetric        |          |                     |          |          |       |
| SourceGene:                                                                                                                     | IRF4(ENSG00000137265.9) |                  |                     |                   |          |                     |          |          |       |
| TargetGeneSet:                                                                                                                  | SLC2A5                  | CDCA8            | CDC20               | CTTNBP2NL         | FCRL6    | IGKJ5               | IGKC     |          |       |
| IGKJ4                                                                                                                           | IGKJ1                   | IGKV4-1          | IGKV1-5             | IGKV1-9           | IGKV1-12 | IGKV2-26            | IGKV2-40 |          |       |
| COBLL1                                                                                                                          | AGAP1                   | CMC1             | WDR53               | RP11              | MYOM2    | ESCO2               | MRPL15   | COPS5    | WDR34 |
| MMP21                                                                                                                           | CDCA5                   | POU2AF1          | CD27                | RFC3              | DLGAP5   | 7SK                 | NUDT14   | IGHG2    | IGHA1 |
| IGHV3-15                                                                                                                        |                         | IGHV3-33         |                     | IGHV3-48          |          | FBN1                | SLC27A2  | KIAA0101 | CDT1  |
| GNG8                                                                                                                            | TK1                     | TYMS             | ALPK2               | CCNE1             | PLCB1    | IGLV7-43            |          | IGLV3-27 |       |
| IGLV2-14                                                                                                                        |                         | IGLV2-11         |                     | CENPM             |          |                     |          |          |       |
| GOBPID                                                                                                                          | Pvalue                  | OddsRatio        | ExpCount            | Count             | Size     | Term                |          |          |       |
| GO:0006958                                                                                                                      | 7.01309979723971e-10    |                  | 81.6875             | 0.103799045048786 |          | 6                   | 50       |          |       |
| complement activation, classical pathway                                                                                        |                         |                  |                     |                   |          |                     |          |          |       |
| GO:0016064                                                                                                                      | 2.29310278073255e-09    |                  | 41.8975752508361    |                   |          | 0.230433880008304   |          |          |       |
| 7 111 immunoglobulin mediated immune response                                                                                   |                         |                  |                     |                   |          |                     |          |          |       |
| GO:0019724                                                                                                                      | 2.7664437309013e-09     |                  | 40.7143437626981    |                   |          | 0.236661822711231   |          |          |       |
| 7 114 B cell mediated immunity                                                                                                  |                         |                  |                     |                   |          |                     |          |          |       |
| GO:0006956                                                                                                                      | 2.94353652635558e-09    |                  | 63                  | 0.13078679676147  |          | 6                   | 63       |          |       |
| complement activation                                                                                                           |                         |                  |                     |                   |          |                     |          |          |       |
| GO:0002455                                                                                                                      | 3.56814685279044e-09    |                  | 60.8559322033898    |                   |          | 0.134938758563421   |          |          |       |
| 6 65 humoral immune response mediated by circulating immunoglobulin                                                             |                         |                  |                     |                   |          |                     |          |          |       |
| GO:0006959                                                                                                                      | 4.45336909211651e-09    |                  | 37.8608695652174    |                   |          | 0.253269669919037   |          |          |       |
| 7 122 humoral immune response                                                                                                   |                         |                  |                     |                   |          |                     |          |          |       |
| GO:0072376                                                                                                                      | 1.47636597233999e-08    |                  | 47.1875             | 0.170230433880008 |          | 6                   | 82       |          |       |
| protein activation cascade                                                                                                      |                         |                  |                     |                   |          |                     |          |          |       |
| GO:0002449                                                                                                                      | 3.94980493955782e-08    |                  | 27.126902173913     | 0.346688810462944 |          |                     | 7        |          |       |
| 167 lymphocyte mediated immunity                                                                                                |                         |                  |                     |                   |          |                     |          |          |       |
| GO:0002460                                                                                                                      | 6.87243232962086e-08    |                  | 24.9197901049475    |                   |          | 0.375752543076604   |          |          |       |
| 7 181 adaptive immune response based on somatic recombination of immune receptors built from immunoglobulin superfamily domains |                         |                  |                     |                   |          |                     |          |          |       |
| GO:0002250                                                                                                                      | 1.27080174854711e-07    |                  | 22.6747097655361    |                   |          | 0.411044218393191   |          |          |       |
| 7 198 adaptive immune response                                                                                                  |                         |                  |                     |                   |          |                     |          |          |       |
| GO:0002443                                                                                                                      | 1.9604963821117e-07     |                  | 21.210358056266     | 0.438031970105875 |          |                     | 7        |          |       |
| 211 leukocyte mediated immunity                                                                                                 |                         |                  |                     |                   |          |                     |          |          |       |
| GO:0002252                                                                                                                      | 1.09965365066131e-05    |                  | 11.27612710795      | 0.801328627776625 |          |                     | 7        |          |       |
| 386 immune effector process                                                                                                     |                         |                  |                     |                   |          |                     |          |          |       |
| GO:0000083                                                                                                                      | 1.21066813281208e-05    |                  | 84.2222222222222    |                   |          | 0.0456715798214656  |          |          |       |
| 3 22 regulation of transcription involved in G1/S phase of mitotic cell cycle                                                   |                         |                  |                     |                   |          |                     |          |          |       |
| GO:0006260                                                                                                                      | 1.57117754284104e-05    |                  | 13.5104961832061    |                   |          | 0.556362881461491   |          |          |       |
| 6 268 DNA replication                                                                                                           |                         |                  |                     |                   |          |                     |          |          |       |
| GO:0046683                                                                                                                      | 2.49334262054495e-05    |                  | 514.964285714286    |                   |          | 0.00830392360390284 |          |          |       |
| 2 4 response to organophosphorus                                                                                                |                         |                  |                     |                   |          |                     |          |          |       |
| GO:0002253                                                                                                                      | 2.91510381377966e-05    |                  | 12.0546075085324    |                   |          | 0.620718289391738   |          |          |       |
| 6 299 activation of immune response                                                                                             |                         |                  |                     |                   |          |                     |          |          |       |
| GO:0050778                                                                                                                      | 8.72085383437034e-05    |                  | 9.82053072625698    |                   |          | 0.755657047955159   |          |          |       |
| 6 364 positive regulation of immune response                                                                                    |                         |                  |                     |                   |          |                     |          |          |       |
| GO:0051329                                                                                                                      | 0.000108923006487434    |                  | 9.41554959785523    |                   |          | 0.786796761469794   |          |          |       |
| 6 379 interphase of mitotic cell cycle                                                                                          |                         |                  |                     |                   |          |                     |          |          |       |
| GO:0051325                                                                                                                      | 0.000122152905799682    |                  | 9.21259842519685    |                   |          | 0.8034046086776     | 6        |          |       |

STable4\_20PerPair

|            |                                         |                                                                          |                  |                   |                     |     |
|------------|-----------------------------------------|--------------------------------------------------------------------------|------------------|-------------------|---------------------|-----|
| 387        | interphase                              |                                                                          |                  |                   |                     |     |
| GO:0010564 |                                         | 0.000176542027190994                                                     | 8.58639705882353 |                   | 0.859456093003944   |     |
| 6          | 414                                     | regulation of cell cycle process                                         |                  |                   |                     |     |
| GO:0017085 |                                         | 0.000490998754115649                                                     | 73.5051020408163 |                   | 0.0332156944156114  |     |
| 2          | 16                                      | response to insecticide                                                  |                  |                   |                     |     |
| GO:0046134 |                                         | 0.000490998754115649                                                     | 73.5051020408163 |                   | 0.0332156944156114  |     |
| 2          | 16                                      | pyrimidine nucleoside biosynthetic process                               |                  |                   |                     |     |
| GO:0000082 |                                         | 0.000560446262152684                                                     | 12.0363482671175 |                   | 0.386132447581482   |     |
| 4          | 186                                     | G1/S transition of mitotic cell cycle                                    |                  |                   |                     |     |
| GO:0000280 |                                         | 0.00070096103904839                                                      | 8.16             | 0.726593315341499 | 5                   | 350 |
|            | nuclear division                        |                                                                          |                  |                   |                     |     |
| GO:0007067 |                                         | 0.00070096103904839                                                      | 8.16             | 0.726593315341499 | 5                   | 350 |
|            | mitosis                                 |                                                                          |                  |                   |                     |     |
| GO:0000236 |                                         | 0.000710936159045463                                                     | 19.429539295393  | 0.176458376582935 |                     | 3   |
| 85         | mitotic prometaphase                    |                                                                          |                  |                   |                     |     |
| GO:0000087 |                                         | 0.000796001281507221                                                     | 7.92450704225352 |                   | 0.747353124351256   |     |
| 5          | 360                                     | M phase of mitotic cell cycle                                            |                  |                   |                     |     |
| GO:0050000 |                                         | 0.000853721583027376                                                     | 54.1428571428571 |                   | 0.0435955989204899  |     |
| 2          | 21                                      | chromosome localization                                                  |                  |                   |                     |     |
| GO:0051303 |                                         | 0.000853721583027376                                                     | 54.1428571428571 |                   | 0.0435955989204899  |     |
| 2          | 21                                      | establishment of chromosome localization                                 |                  |                   |                     |     |
| GO:0048285 |                                         | 0.000900405065550077                                                     | 7.70191780821918 |                   | 0.768112933361013   |     |
| 5          | 370                                     | organelle fission                                                        |                  |                   |                     |     |
| GO:0006261 |                                         | 0.000923656040316583                                                     | 17.6925925925926 |                   | 0.193066223790741   |     |
| 3          | 93                                      | DNA-dependent DNA replication                                            |                  |                   |                     |     |
| GO:0006270 |                                         | 0.00152288932364902                                                      | 39.5467032967033 |                   | 0.0581274652273199  |     |
| 2          | 28                                      | DNA-dependent DNA replication initiation                                 |                  |                   |                     |     |
| GO:0006206 |                                         | 0.0018661659196972                                                       | 35.448275862069  | 0.064355407930247 |                     | 2   |
| 31         | pyrimidine nucleobase metabolic process |                                                                          |                  |                   |                     |     |
| GO:0046328 |                                         | 0.00187949804348116                                                      | 13.7021072796935 |                   | 0.24704172721611    |     |
| 3          | 119                                     | regulation of JNK cascade                                                |                  |                   |                     |     |
| GO:0006213 |                                         | 0.00224275321203353                                                      | 32.1183035714286 |                   | 0.0705833506331742  |     |
| 2          | 34                                      | pyrimidine nucleoside metabolic process                                  |                  |                   |                     |     |
| GO:0009116 |                                         | 0.00244994736528106                                                      | 6.08366013071895 |                   | 0.96325513805273    |     |
| 5          | 464                                     | nucleoside metabolic process                                             |                  |                   |                     |     |
| GO:0032872 |                                         | 0.00263552374485869                                                      | 12.1204410517388 |                   | 0.278181440730745   |     |
| 3          | 134                                     | regulation of stress-activated MAPK cascade                              |                  |                   |                     |     |
| GO:0072528 |                                         | 0.00265225176724534                                                      | 29.3591836734694 |                   | 0.0768112933361013  |     |
| 2          | 37                                      | pyrimidine-containing compound biosynthetic process                      |                  |                   |                     |     |
| GO:0070302 |                                         | 0.0026916646768698                                                       | 12.0277777777778 |                   | 0.280257421631721   |     |
| 3          | 135                                     | regulation of stress-activated protein kinase signaling cascade          |                  |                   |                     |     |
| GO:0030071 |                                         | 0.003568401878669                                                        | 25.0522648083624 |                   | 0.0892671787419556  |     |
| 2          | 43                                      | regulation of mitotic metaphase/anaphase transition                      |                  |                   |                     |     |
| GO:0009163 |                                         | 0.00373351828160889                                                      | 24.4540816326531 |                   | 0.0913431596429313  |     |
| 2          | 44                                      | nucleoside biosynthetic process                                          |                  |                   |                     |     |
| GO:0007091 |                                         | 0.00390214623434245                                                      | 23.8837209302326 |                   | 0.093419140543907   |     |
| 2          | 45                                      | mitotic metaphase/anaphase transition                                    |                  |                   |                     |     |
| GO:0007254 |                                         | 0.00397341622746089                                                      | 10.4305555555556 |                   | 0.321777039651235   |     |
| 3          | 155                                     | JNK cascade                                                              |                  |                   |                     |     |
| GO:0046330 |                                         | 0.00407427144053518                                                      | 23.3392857142857 |                   | 0.0954951214448827  |     |
| 2          | 46                                      | positive regulation of JNK cascade                                       |                  |                   |                     |     |
| GO:0000070 |                                         | 0.0046114882279282                                                       | 21.8449848024316 |                   | 0.10172306414781    |     |
| 2          | 49                                      | mitotic sister chromatid segregation                                     |                  |                   |                     |     |
| GO:0000819 |                                         | 0.00517966953394121                                                      | 20.53            | 0.107951006850737 | 2                   | 52  |
|            | sister chromatid segregation            |                                                                          |                  |                   |                     |     |
| GO:0031100 |                                         | 0.00517966953394121                                                      | 20.53            | 0.107951006850737 | 2                   | 52  |
|            | organ regeneration                      |                                                                          |                  |                   |                     |     |
| GO:0032874 |                                         | 0.00537587863173543                                                      | 20.1260504201681 |                   | 0.110026987751713   |     |
| 2          | 53                                      | positive regulation of stress-activated MAPK cascade                     |                  |                   |                     |     |
| GO:0070304 |                                         | 0.00557547207282642                                                      | 19.7376373626374 |                   | 0.112102968652688   |     |
| 2          | 54                                      | positive regulation of stress-activated protein kinase signaling cascade |                  |                   |                     |     |
| GO:0006235 |                                         | 0.00621545179129268                                                      | 248.603448275862 |                   | 0.00622794270292713 |     |

STable4\_20PerPair

|                                                                        |     |                                                                  |                  |                   |                     |
|------------------------------------------------------------------------|-----|------------------------------------------------------------------|------------------|-------------------|---------------------|
| 1                                                                      | 3   | dTTP biosynthetic process                                        |                  |                   |                     |
| GO:0009176                                                             |     | 0.00621545179129268                                              | 248.603448275862 |                   | 0.00622794270292713 |
| 1                                                                      | 3   | pyrimidine deoxyribonucleoside monophosphate metabolic process   |                  |                   |                     |
| GO:0009212                                                             |     | 0.00621545179129268                                              | 248.603448275862 |                   | 0.00622794270292713 |
| 1                                                                      | 3   | pyrimidine deoxyribonucleoside triphosphate biosynthetic process |                  |                   |                     |
| GO:0034421                                                             |     | 0.00621545179129268                                              | 248.603448275862 |                   | 0.00622794270292713 |
| 1                                                                      | 3   | post-translational protein acetylation                           |                  |                   |                     |
| GO:0035582                                                             |     | 0.00621545179129268                                              | 248.603448275862 |                   | 0.00622794270292713 |
| 1                                                                      | 3   | sequestering of BMP in extracellular matrix                      |                  |                   |                     |
| GO:0035583                                                             |     | 0.00621545179129268                                              | 248.603448275862 |                   | 0.00622794270292713 |
| 1                                                                      | 3   | sequestering of TGFbeta in extracellular matrix                  |                  |                   |                     |
| GO:0035722                                                             |     | 0.00621545179129268                                              | 248.603448275862 |                   | 0.00622794270292713 |
| 1                                                                      | 3   | interleukin-12-mediated signaling pathway                        |                  |                   |                     |
| GO:0035962                                                             |     | 0.00621545179129268                                              | 248.603448275862 |                   | 0.00622794270292713 |
| 1                                                                      | 3   | response to interleukin-13                                       |                  |                   |                     |
| GO:0046075                                                             |     | 0.00621545179129268                                              | 248.603448275862 |                   | 0.00622794270292713 |
| 1                                                                      | 3   | dTTP metabolic process                                           |                  |                   |                     |
| GO:0046078                                                             |     | 0.00621545179129268                                              | 248.603448275862 |                   | 0.00622794270292713 |
| 1                                                                      | 3   | dUMP metabolic process                                           |                  |                   |                     |
| GO:0051305                                                             |     | 0.00621545179129268                                              | 248.603448275862 |                   | 0.00622794270292713 |
| 1                                                                      | 3   | chromosome movement towards spindle pole                         |                  |                   |                     |
| GO:0060574                                                             |     | 0.00621545179129268                                              | 248.603448275862 |                   | 0.00622794270292713 |
| 1                                                                      | 3   | intestinal epithelial cell maturation                            |                  |                   |                     |
| GO:0071349                                                             |     | 0.00621545179129268                                              | 248.603448275862 |                   | 0.00622794270292713 |
| 1                                                                      | 3   | cellular response to interleukin-12                              |                  |                   |                     |
| GO:0071921                                                             |     | 0.00621545179129268                                              | 248.603448275862 |                   | 0.00622794270292713 |
| 1                                                                      | 3   | cohesin localization to chromatin                                |                  |                   |                     |
| GO:0071922                                                             |     | 0.00621545179129268                                              | 248.603448275862 |                   | 0.00622794270292713 |
| 1                                                                      | 3   | regulation of cohesin localization to chromatin                  |                  |                   |                     |
| GO:0009112                                                             |     | 0.00752182272701937                                              | 16.8149882903981 |                   | 0.13078679676147    |
| 2                                                                      | 63  | nucleobase metabolic process                                     |                  |                   |                     |
| GO:0051403                                                             |     | 0.00761940766133823                                              | 8.19113413932067 |                   | 0.406892256591239   |
| 3                                                                      | 196 | stress-activated MAPK cascade                                    |                  |                   |                     |
| GO:0031098                                                             |     | 0.00794330404242971                                              | 8.0640589569161  | 0.413120199294166 | 3                   |
| 199                                                                    |     | stress-activated protein kinase signaling cascade                |                  |                   |                     |
| GO:0002069                                                             |     | 0.00827895791298872                                              | 165.724137931034 |                   | 0.00830392360390284 |
| 1                                                                      | 4   | columnar/cuboidal epithelial cell maturation                     |                  |                   |                     |
| GO:0008588                                                             |     | 0.00827895791298872                                              | 165.724137931034 |                   | 0.00830392360390284 |
| 1                                                                      | 4   | release of cytoplasmic sequestered NF-kappaB                     |                  |                   |                     |
| GO:0009162                                                             |     | 0.00827895791298872                                              | 165.724137931034 |                   | 0.00830392360390284 |
| 1                                                                      | 4   | deoxyribonucleoside monophosphate metabolic process              |                  |                   |                     |
| GO:0009202                                                             |     | 0.00827895791298872                                              | 165.724137931034 |                   | 0.00830392360390284 |
| 1                                                                      | 4   | deoxyribonucleoside triphosphate biosynthetic process            |                  |                   |                     |
| GO:0009221                                                             |     | 0.00827895791298872                                              | 165.724137931034 |                   | 0.00830392360390284 |
| 1                                                                      | 4   | pyrimidine deoxyribonucleotide biosynthetic process              |                  |                   |                     |
| GO:0019087                                                             |     | 0.00827895791298872                                              | 165.724137931034 |                   | 0.00830392360390284 |
| 1                                                                      | 4   | transformation of host cell by virus                             |                  |                   |                     |
| GO:0044539                                                             |     | 0.00827895791298872                                              | 165.724137931034 |                   | 0.00830392360390284 |
| 1                                                                      | 4   | long-chain fatty acid import                                     |                  |                   |                     |
| GO:0070671                                                             |     | 0.00827895791298872                                              | 165.724137931034 |                   | 0.00830392360390284 |
| 1                                                                      | 4   | response to interleukin-12                                       |                  |                   |                     |
| GO:0072527                                                             |     | 0.00896611506890538                                              | 15.3027718550107 |                   | 0.143242682167324   |
| 2                                                                      | 69  | pyrimidine-containing compound metabolic process                 |                  |                   |                     |
| Tissue: whole_Blood=>Skin_Sun_Exposed_Lower_leg Type: cluster          |     |                                                                  |                  |                   |                     |
| SourceGene: RGS9BP(ENSG00000186326.3)                                  |     |                                                                  |                  |                   |                     |
| TargetGeneSet: MTOR SNORA44 YARS FUBP1 CCT3 RP11 IL36G SMARCC1         |     |                                                                  |                  |                   |                     |
| TBC1D23 GS1 NPHP3-AS1 ACTL6A MAPK10 MCCC2 CETN3 WDR36 PCDHA3           |     |                                                                  |                  |                   |                     |
| UNC93B2 POLD2 IARS SNORA65 NUP188 RP1 DDX21 EIF5AL1 SSRP1 SMARCD1 MARS |     |                                                                  |                  |                   |                     |
| WARS ERVK13-1 CIRH1A RP13 GATAD2A RAB9A HUWE1 EIF4A1P10                |     |                                                                  |                  |                   |                     |
| GOBPID Pvalue OddsRatio ExpCount Count Size Term                       |     |                                                                  |                  |                   |                     |
| GO:0006418                                                             |     | 2.06875209418619e-06                                             | 54.4659090909091 |                   | 0.0930039443637119  |
| 4                                                                      | 48  | trNA aminoacylation for protein translation                      |                  |                   |                     |
| GO:0043038                                                             |     | 2.64632817524487e-06                                             | 50.9787234042553 |                   | 0.0988166908864438  |



Stable4\_20PerPair

|            |     |                                                                                       |                  |                    |                     |
|------------|-----|---------------------------------------------------------------------------------------|------------------|--------------------|---------------------|
| 4          | 51  | amino acid activation                                                                 |                  |                    |                     |
| GO:0043039 |     | 2.64632817524487e-06                                                                  | 50.9787234042553 |                    | 0.0988166908864438  |
| 4          | 51  | tRNA aminoacylation                                                                   |                  |                    |                     |
| GO:0006399 |     | 9.30078473704163e-05                                                                  | 19.6997245179063 |                    | 0.2421977717805 4   |
| 125        |     | tRNA metabolic process                                                                |                  |                    |                     |
| GO:0006520 |     | 0.000158059955127382                                                                  | 8.8538283062645  | 0.846723410144627  | 6                   |
| 437        |     | cellular amino acid metabolic process                                                 |                  |                    |                     |
| GO:0034660 |     | 0.000195112549181615                                                                  | 10.9805900621118 |                    | 0.552210919659539   |
| 5          | 285 | ncRNA metabolic process                                                               |                  |                    |                     |
| GO:0006337 |     | 0.000427212296667532                                                                  | 79.1703296703297 |                    | 0.031001314787904   |
| 2          | 16  | nucleosome disassembly                                                                |                  |                    |                     |
| GO:0031498 |     | 0.000427212296667532                                                                  | 79.1703296703297 |                    | 0.031001314787904   |
| 2          | 16  | chromatin disassembly                                                                 |                  |                    |                     |
| GO:0032986 |     | 0.000427212296667532                                                                  | 79.1703296703297 |                    | 0.031001314787904   |
| 2          | 16  | protein-DNA complex disassembly                                                       |                  |                    |                     |
| GO:0006338 |     | 0.000728937332475213                                                                  | 19.3267415730337 |                    | 0.178257560030448   |
| 3          | 92  | chromatin remodeling                                                                  |                  |                    |                     |
| GO:0003407 |     | 0.00195462228590431                                                                   | 34.59375         | 0.0658777939242959 | 2                   |
| 34         |     | neural retina development                                                             |                  |                    |                     |
| GO:0006284 |     | 0.00256637724351022                                                                   | 29.9085239085239 |                    | 0.0755657047955159  |
| 2          | 39  | base-excision repair                                                                  |                  |                    |                     |
| GO:0045727 |     | 0.00325684462408351                                                                   | 26.3388278388278 |                    | 0.0852536156667359  |
| 2          | 44  | positive regulation of translation                                                    |                  |                    |                     |
| GO:0034623 |     | 0.00450506472400742                                                                   | 10.0014035087719 |                    | 0.337139298318455   |
| 3          | 174 | cellular macromolecular complex disassembly                                           |                  |                    |                     |
| GO:0032984 |     | 0.00487551796190549                                                                   | 9.71386363636364 |                    | 0.346827209189675   |
| 3          | 179 | macromolecular complex disassembly                                                    |                  |                    |                     |
| GO:0006452 |     | 0.00580189185011537                                                                   | 267.055555555556 |                    | 0.00581274652273199 |
| 1          | 3   | translational frameshifting                                                           |                  |                    |                     |
| GO:0031585 |     | 0.00580189185011537                                                                   | 267.055555555556 |                    | 0.00581274652273199 |
| 1          | 3   | regulation of inositol 1,4,5-trisphosphate-sensitive calcium-release channel activity |                  |                    |                     |
| GO:0031987 |     | 0.00580189185011537                                                                   | 267.055555555556 |                    | 0.00581274652273199 |
| 1          | 3   | locomotion involved in locomotory behavior                                            |                  |                    |                     |
| GO:0035845 |     | 0.00580189185011537                                                                   | 267.055555555556 |                    | 0.00581274652273199 |
| 1          | 3   | photoreceptor cell outer segment organization                                         |                  |                    |                     |
| GO:0045901 |     | 0.00580189185011537                                                                   | 267.055555555556 |                    | 0.00581274652273199 |
| 1          | 3   | positive regulation of translational elongation                                       |                  |                    |                     |
| GO:0045905 |     | 0.00580189185011537                                                                   | 267.055555555556 |                    | 0.00581274652273199 |
| 1          | 3   | positive regulation of translational termination                                      |                  |                    |                     |
| GO:0051643 |     | 0.00580189185011537                                                                   | 267.055555555556 |                    | 0.00581274652273199 |
| 1          | 3   | endoplasmic reticulum localization                                                    |                  |                    |                     |
| GO:0006281 |     | 0.00601085130482567                                                                   | 6.17590149516271 |                    | 0.742093972735451   |
| 4          | 383 | DNA repair                                                                            |                  |                    |                     |
| GO:0007601 |     | 0.00700239291779578                                                                   | 8.49074626865672 |                    | 0.395266763545775   |
| 3          | 204 | visual perception                                                                     |                  |                    |                     |
| GO:0050953 |     | 0.0070972325754923                                                                    | 8.44811881188119 |                    | 0.397204345720019   |
| 3          | 205 | sensory perception of light stimulus                                                  |                  |                    |                     |
| GO:0001842 |     | 0.00772863236978594                                                                   | 178.024691358025 |                    | 0.00775032869697599 |
| 1          | 4   | neural fold formation                                                                 |                  |                    |                     |
| GO:0007258 |     | 0.00772863236978594                                                                   | 178.024691358025 |                    | 0.00775032869697599 |
| 1          | 4   | JUN phosphorylation                                                                   |                  |                    |                     |
| GO:0042759 |     | 0.00772863236978594                                                                   | 178.024691358025 |                    | 0.00775032869697599 |
| 1          | 4   | long-chain fatty acid biosynthetic process                                            |                  |                    |                     |
| GO:0051534 |     | 0.00772863236978594                                                                   | 178.024691358025 |                    | 0.00775032869697599 |
| 1          | 4   | negative regulation of NFAT protein import into nucleus                               |                  |                    |                     |
| GO:0016568 |     | 0.00821900438944382                                                                   | 5.62570281124498 |                    | 0.811846931008235   |
| 4          | 419 | chromatin modification                                                                |                  |                    |                     |
| GO:0006552 |     | 0.00965177200387202                                                                   | 133.509259259259 |                    | 0.00968791087121998 |
| 1          | 5   | leucine catabolic process                                                             |                  |                    |                     |
| GO:0008612 |     | 0.00965177200387202                                                                   | 133.509259259259 |                    | 0.00968791087121998 |
| 1          | 5   | peptidyl-lysine modification to hypusine                                              |                  |                    |                     |
| GO:0010172 |     | 0.00965177200387202                                                                   | 133.509259259259 |                    | 0.00968791087121998 |

Stable4\_20PerPair

|                                                                  |        |                                               |                  |                    |          |                                                                                                                           |           |          |                     |
|------------------------------------------------------------------|--------|-----------------------------------------------|------------------|--------------------|----------|---------------------------------------------------------------------------------------------------------------------------|-----------|----------|---------------------|
| 1                                                                | 5      | embryonic body morphogenesis                  |                  |                    |          |                                                                                                                           |           |          |                     |
| GO:0010592                                                       |        | 0.00965177200387202                           | 133.509259259259 |                    |          |                                                                                                                           |           |          | 0.00968791087121998 |
| 1                                                                | 5      | positive regulation of lamellipodium assembly |                  |                    |          |                                                                                                                           |           |          |                     |
| GO:0046516                                                       |        | 0.00965177200387202                           | 133.509259259259 |                    |          |                                                                                                                           |           |          | 0.00968791087121998 |
| 1                                                                | 5      | hypusine metabolic process                    |                  |                    |          |                                                                                                                           |           |          |                     |
| Tissue: Skin_Sun_Exposed_Lower_leg=>whole_Blood Type: asymmetric |        |                                               |                  |                    |          |                                                                                                                           |           |          |                     |
| SourceGene: RP11-30K9.1(ENSG00000242747.1)                       |        |                                               |                  |                    |          |                                                                                                                           |           |          |                     |
| TargetGeneSet:                                                   | IGKJ5  | IGKC                                          | IGKV3-20         | IGKV1D-33          | IGJ      | RP11                                                                                                                      | OIT3      |          |                     |
| POU2AF1                                                          | CD27   | IGHG4                                         | IGHV6-1          | IGHV3-48           | IGHV3-66 | PIN1                                                                                                                      | IGLV4-69  |          |                     |
| IGLV7-43                                                         |        | IGLV2-11                                      | IGLL5            | IGLC1              | IGLC3    |                                                                                                                           |           |          |                     |
| GOBPID                                                           | Pvalue | OddsRatio                                     | ExpCount         | Count              | Size     | Term                                                                                                                      |           |          |                     |
| GO:0006958                                                       |        | 2.99457525887675e-15                          | 468.706976744186 |                    |          | complement activation, classical pathway                                                                                  |           |          | 0.0415196180195142  |
| 7                                                                | 50     |                                               |                  |                    |          |                                                                                                                           |           |          |                     |
| GO:0016064                                                       |        | 4.52579542866057e-15                          | 278.368932038835 |                    |          | immunoglobulin mediated immune response                                                                                   |           |          | 0.0921735520033216  |
| 8                                                                | 111    |                                               |                  |                    |          |                                                                                                                           |           |          |                     |
| GO:0019724                                                       |        | 5.63696014075246e-15                          | 270.433962264151 |                    |          | B cell mediated immunity                                                                                                  |           |          | 0.0946647290844924  |
| 8                                                                | 114    |                                               |                  |                    |          |                                                                                                                           |           |          |                     |
| GO:0006959                                                       |        | 9.84305831228007e-15                          | 251.315789473684 |                    |          | humoral immune response                                                                                                   |           |          | 0.101307867967615   |
| 8                                                                | 122    |                                               |                  |                    |          |                                                                                                                           |           |          |                     |
| GO:0006956                                                       |        | 1.65219043065932e-14                          | 359.575          | 0.0523147187045879 |          | complement activation                                                                                                     | 7         | 63       |                     |
| GO:0002455                                                       |        | 2.07771802599751e-14                          | 347.127586206897 |                    |          | humoral immune response mediated by circulating immunoglobulin                                                            |           |          | 0.0539755034253685  |
| 7                                                                | 65     |                                               |                  |                    |          |                                                                                                                           |           |          |                     |
| GO:0072376                                                       |        | 1.12875009563322e-13                          | 268.128          | 0.0680921735520033 |          | protein activation cascade                                                                                                | 7         | 82       |                     |
| GO:0002449                                                       |        | 1.27933119593271e-13                          | 179.622641509434 |                    |          | lymphocyte mediated immunity                                                                                              |           |          | 0.138675524185178   |
| 8                                                                | 167    |                                               |                  |                    |          |                                                                                                                           |           |          |                     |
| GO:0002460                                                       |        | 2.46018468357929e-13                          | 164.924855491329 |                    |          | adaptive immune response based on somatic recombination of immune receptors built from immunoglobulin superfamily domains |           |          | 0.150301017230641   |
| 8                                                                | 181    |                                               |                  |                    |          |                                                                                                                           |           |          |                     |
| GO:0002250                                                       |        | 5.09270648501912e-13                          | 149.989473684211 |                    |          | adaptive immune response                                                                                                  |           |          | 0.164417687357276   |
| 8                                                                | 198    |                                               |                  |                    |          |                                                                                                                           |           |          |                     |
| GO:0002443                                                       |        | 8.51842893630051e-13                          | 140.256157635468 |                    |          | leukocyte mediated immunity                                                                                               |           |          | 0.17521278804235    |
| 8                                                                | 211    |                                               |                  |                    |          |                                                                                                                           |           |          |                     |
| GO:0002252                                                       |        | 1.08736784903e-10                             | 74.3968253968254 |                    |          | immune effector process                                                                                                   |           |          | 0.32053145111065    |
| 8                                                                | 386    |                                               |                  |                    |          |                                                                                                                           |           |          |                     |
| GO:0002253                                                       |        | 1.09725182564844e-09                          | 67.8280821917808 |                    |          | activation of immune response                                                                                             |           |          | 0.248287315756695   |
| 7                                                                | 299    |                                               |                  |                    |          |                                                                                                                           |           |          |                     |
| GO:0050778                                                       |        | 4.31644181867618e-09                          | 55.2235294117647 |                    |          | positive regulation of immune response                                                                                    |           |          | 0.302262819182064   |
| 7                                                                | 364    |                                               |                  |                    |          |                                                                                                                           |           |          |                     |
| GO:0008588                                                       |        | 0.00331777839570147                           | 437.454545454545 |                    |          | release of cytoplasmic sequestered NF-kappaB                                                                              |           |          | 0.00332156944156114 |
| 1                                                                | 4      |                                               |                  |                    |          |                                                                                                                           |           |          |                     |
| GO:0010741                                                       |        | 0.00386653165633848                           | 25.5839285714286 |                    |          | negative regulation of intracellular protein kinase cascade                                                               |           |          | 0.0946647290844924  |
| 2                                                                | 114    |                                               |                  |                    |          |                                                                                                                           |           |          |                     |
| GO:0000244                                                       |        | 0.00497288091920933                           | 262.436363636364 |                    |          | assembly of spliceosomal tri-snRNP                                                                                        |           |          | 0.00498235416234171 |
| 1                                                                | 6      |                                               |                  |                    |          |                                                                                                                           |           |          |                     |
| GO:0045579                                                       |        | 0.00745081118520774                           | 163.988636363636 |                    |          | positive regulation of B cell differentiation                                                                             |           |          | 0.00747353124351256 |
| 1                                                                | 9      |                                               |                  |                    |          |                                                                                                                           |           |          |                     |
| GO:0007253                                                       |        | 0.00827553007911286                           | 145.757575757576 |                    |          | cytoplasmic sequestering of NF-kappaB                                                                                     |           |          | 0.00830392360390284 |
| 1                                                                | 10     |                                               |                  |                    |          |                                                                                                                           |           |          |                     |
| Tissue: Whole_Blood=>Skin_Sun_Exposed_Lower_leg Type: cluster    |        |                                               |                  |                    |          |                                                                                                                           |           |          |                     |
| SourceGene: RP11-793H13.3(ENSG00000257550.1)                     |        |                                               |                  |                    |          |                                                                                                                           |           |          |                     |
| TargetGeneSet:                                                   | RPL11  | ENSA                                          | RP11             | SLC5A6             | YPEL5    | COX7A2L                                                                                                                   | AMT       | RPL24    |                     |
| PODXL2                                                           | NMNAT3 | RPL35A                                        | CAMLG            | PCDHGA12           | CNN2P9   | IL20RA                                                                                                                    | FAM103A2P |          |                     |
| PRKRIP1                                                          | RPS20  | RPL30                                         | C11orf54         | ATP5L              | PFDN5    | RPL41                                                                                                                     | MYL6      | C12orf47 |                     |
| COMMD6                                                           | ABCD4  | MGRN1                                         | PKD1P1           | ZNF668             | C16orf57 | CXCL16                                                                                                                    | RPL17     | RP1      |                     |
| TMEM241                                                          | ZNF554 | PIN1                                          | RAVER1           | ZNF44              | RRP1B    | FIGF                                                                                                                      | GPR64     | ALG13    | RBMX2               |
| SRRM1P3                                                          |        |                                               |                  |                    |          |                                                                                                                           |           |          |                     |
| GOBPID                                                           | Pvalue | OddsRatio                                     | ExpCount         | Count              | Size     | Term                                                                                                                      |           |          |                     |
| GO:0006415                                                       |        | 1.16140676328024e-09                          | 45.9423076923077 |                    |          | translational termination                                                                                                 |           |          | 0.207805688187669   |
| 7                                                                | 91     |                                               |                  |                    |          |                                                                                                                           |           |          |                     |
| GO:0006414                                                       |        | 3.1944222991207e-09                           | 39.3406593406593 |                    |          | translational elongation                                                                                                  |           |          | 0.239775794062695   |
| 7                                                                | 105    |                                               |                  |                    |          |                                                                                                                           |           |          |                     |

Stable4\_20PerPair

|            |                      |                                                                     |                     |   |     |
|------------|----------------------|---------------------------------------------------------------------|---------------------|---|-----|
| GO:0006614 | 3.1944222991207e-09  | 39.3406593406593                                                    | 0.239775794062695   |   |     |
| 7          | 105                  | SRP-dependent cotranslational protein targeting to membrane         |                     |   |     |
| GO:0006613 | 3.41488435085084e-09 | 38.9405594405594                                                    | 0.242059373053768   |   |     |
| 7          | 106                  | cotranslational protein targeting to membrane                       |                     |   |     |
| GO:0045047 | 3.41488435085084e-09 | 38.9405594405594                                                    | 0.242059373053768   |   |     |
| 7          | 106                  | protein targeting to ER                                             |                     |   |     |
| GO:0072599 | 3.41488435085084e-09 | 38.9405594405594                                                    | 0.242059373053768   |   |     |
| 7          | 106                  | establishment of protein localization to endoplasmic reticulum      |                     |   |     |
| GO:0070972 | 7.24882883816765e-09 | 34.7016632016632                                                    | 0.269462320946647   |   |     |
| 7          | 118                  | protein localization to endoplasmic reticulum                       |                     |   |     |
| GO:0000184 | 7.68970124063241e-09 | 34.3894230769231                                                    | 0.271745899937721   |   |     |
| 7          | 119                  | nuclear-transcribed mRNA catabolic process, nonsense-mediated decay |                     |   |     |
| GO:0019080 | 4.02441630509631e-08 | 26.6875                                                             | 0.344820427652066   | 7 | 151 |
|            |                      | viral genome expression                                             |                     |   |     |
| GO:0019083 | 4.02441630509631e-08 | 26.6875                                                             | 0.344820427652066   | 7 | 151 |
|            |                      | viral transcription                                                 |                     |   |     |
| GO:0006413 | 4.21201943469109e-08 | 26.5015915119363                                                    | 0.347104006643139   |   |     |
| 7          | 152                  | translational initiation                                            |                     |   |     |
| GO:0006612 | 4.40697714283786e-08 | 26.31822971549                                                      | 0.349387585634212   | 7 |     |
| 153        |                      | protein targeting to membrane                                       |                     |   |     |
| GO:0043624 | 4.40697714283786e-08 | 26.31822971549                                                      | 0.349387585634212   | 7 |     |
| 153        |                      | cellular protein complex disassembly                                |                     |   |     |
| GO:0043241 | 5.50047189202055e-08 | 25.437850229241                                                     | 0.360805480589579   | 7 |     |
| 158        |                      | protein complex disassembly                                         |                     |   |     |
| GO:0000956 | 8.73563769337154e-08 | 23.6923076923077                                                    | 0.385924849491385   |   |     |
| 7          | 169                  | nuclear-transcribed mRNA catabolic process                          |                     |   |     |
| GO:0034623 | 1.0667937829241e-07  | 22.9748963611239                                                    | 0.397342744446751   |   |     |
| 7          | 174                  | cellular macromolecular complex disassembly                         |                     |   |     |
| GO:0006402 | 1.24631723310076e-07 | 22.4311740890688                                                    | 0.406477060411044   |   |     |
| 7          | 178                  | mRNA catabolic process                                              |                     |   |     |
| GO:0032984 | 1.29498403200952e-07 | 22.2991949910555                                                    | 0.408760639402117   |   |     |
| 7          | 179                  | macromolecular complex disassembly                                  |                     |   |     |
| GO:0072594 | 3.15403759765586e-07 | 19.4351815696993                                                    | 0.46585011417895    |   |     |
| 7          | 204                  | establishment of protein localization to organelle                  |                     |   |     |
| GO:0006401 | 3.26036440051995e-07 | 19.3356643356643                                                    | 0.468133693170023   |   |     |
| 7          | 205                  | RNA catabolic process                                               |                     |   |     |
| GO:0019058 | 7.30213596072562e-07 | 17.0600961538462                                                    | 0.527506746937928   |   |     |
| 7          | 231                  | viral infectious cycle                                              |                     |   |     |
| GO:0022415 | 1.61228593661965e-06 | 15.0737306172089                                                    | 0.593730537679053   |   |     |
| 7          | 260                  | viral reproductive process                                          |                     |   |     |
| GO:0071845 | 2.89924998179782e-06 | 13.7443765620661                                                    | 0.648536433464812   |   |     |
| 7          | 284                  | cellular component disassembly at cellular level                    |                     |   |     |
| GO:0022411 | 3.18047733974922e-06 | 13.5448946071722                                                    | 0.657670749429105   |   |     |
| 7          | 288                  | cellular component disassembly                                      |                     |   |     |
| GO:0016032 | 5.81527882048049e-05 | 8.47349272349272                                                    | 1.02989412497405    |   |     |
| 7          | 451                  | viral reproduction                                                  |                     |   |     |
| GO:0033365 | 7.8526277819052e-05  | 8.06074612083196                                                    | 1.08013286277766    |   |     |
| 7          | 473                  | protein localization to organelle                                   |                     |   |     |
| GO:0006605 | 7.9575777695673e-05  | 8.04290891121726                                                    | 1.08241644176874    |   |     |
| 7          | 474                  | protein targeting                                                   |                     |   |     |
| GO:0042273 | 0.000329025405415394 | 92.9548387096774                                                    | 0.0274029478928794  |   |     |
| 2          | 12                   | ribosomal large subunit biogenesis                                  |                     |   |     |
| GO:0022613 | 0.00164272199518457  | 8.86066469027929                                                    | 0.513805272991488   |   |     |
| 4          | 225                  | ribonucleoprotein complex biogenesis                                |                     |   |     |
| GO:0006364 | 0.00168869785645069  | 14.1752475247525                                                    | 0.237492215071621   |   |     |
| 3          | 104                  | rRNA processing                                                     |                     |   |     |
| GO:0016072 | 0.00198282663718325  | 13.3747663551402                                                    | 0.251193689018061   |   |     |
| 3          | 110                  | rRNA metabolic process                                              |                     |   |     |
| GO:0071843 | 0.00204818652604451  | 8.32457813646368                                                    | 0.545775378866514   |   |     |
| 4          | 239                  | cellular component biogenesis at cellular level                     |                     |   |     |
| GO:0042254 | 0.00467287352945188  | 9.77534246575343                                                    | 0.340253269669919   |   |     |
| 3          | 149                  | ribosome biogenesis                                                 |                     |   |     |
| GO:0035845 | 0.00683557664080414  | 225.25                                                              | 0.00685073697321985 | 1 | 3   |

Stable4\_20PerPair

photoreceptor cell outer segment organization  
 GO:0006767 0.00933253719975094 14.9386056191467 0.14614905542869  
 2 64 water-soluble vitamin metabolic process  
 Tissue: whole\_Blood=>Skin\_Sun\_Exposed\_Lower\_leg Type: asymmetric  
 SourceGene: SEPT4(ENSG00000108387.9)  
 TargetGeneSet: DNAJC11 MRT04 TCEA3 CTPS HPDL SELRC1 CHD1L TOMM40L  
 RNPEP MTHFD2 TTC21B NT5DC2 MYH15 LRRC58 SIAH2 SIAH2-AS1 MED12L  
 CLCN2 LSG1 RP11 MYO10 PAK1IP1 PPIL1 BYSL XPO5 PLEKHG1 CYCS  
 BLVRA ABCF2 RCL1 NGB DDB2 NEU3 GLB1L2 CD9 ETV6 CPM MVK  
 SYNE2 TMEM63C DIO2 SEMA7A CHRNB4 EME2 TSR1 SHISA6 RPL17P43  
 SRCIN1 TRIM47 GAMT KDELR1 MAFB TOP1 C2CD2 BCRP8 PNPLA3  
 GOBPID Pvalue OddsRatio ExpCount Count Size Term  
 GO:0022613 4.04205087004368e-06 12.6567278287462 0.669503840564667  
 7 225 ribonucleoprotein complex biogenesis  
 GO:0042254 4.83457333665675e-06 16.1765261765262 0.443360321085046  
 6 149 ribosome biogenesis  
 GO:0071843 6.01424224862718e-06 11.8812260536398 0.711161857310913  
 7 239 cellular component biogenesis at cellular level  
 GO:0009240 0.00890079624592366 171.5 0.00892671787419556 1 3  
 isopentenyl diphosphate biosynthetic process  
 GO:0019287 0.00890079624592366 171.5 0.00892671787419556 1 3  
 isopentenyl diphosphate biosynthetic process, mevalonate pathway  
 GO:0042396 0.00890079624592366 171.5 0.00892671787419556 1 3  
 phosphagen biosynthetic process  
 GO:0046490 0.00890079624592366 171.5 0.00892671787419556 1 3  
 isopentenyl diphosphate metabolic process  
 GO:0060084 0.00890079624592366 171.5 0.00892671787419556 1 3  
 synaptic transmission involved in micturition  
 GO:0060689 0.00890079624592366 171.5 0.00892671787419556 1 3  
 cell differentiation involved in salivary gland development  
 Tissue: whole\_Blood=>Skin\_Sun\_Exposed\_Lower\_leg Type: asymmetric  
 SourceGene: SMAD7(ENSG00000101665.3)  
 TargetGeneSet: MTND1P23 RP4 POLN FTH1P10 OGFRL1 MACC1 RP11  
 NIPSNAP3B ZNF462 E2F1 C11orf2 USP28 RP1 RPL13AP25 PLEKHD1 FMN1  
 CTA RPS2P45 RPSAP58 LMTK3 IGLON5  
 GOBPID Pvalue OddsRatio ExpCount Count Size Term  
 GO:0071482 2.14074345900805e-06 165.632183908046 0.0265725555324891  
 3 32 cellular response to light stimulus  
 GO:0071478 1.31565095878328e-05 87.1757575757576 0.0481627569026365  
 3 58 cellular response to radiation  
 GO:0007603 3.46231896661738e-05 320.666666666667 0.00913431596429313  
 2 11 phototransduction, visible light  
 GO:0009584 0.000119111662011372 160.233333333333 0.0166078472078057  
 2 20 detection of visible light  
 GO:0071214 0.000154307642306514 36.9767441860465 0.109611791571518  
 3 132 cellular response to abiotic stimulus  
 GO:0007602 0.000329025405415394 92.9548387096774 0.0274029478928794  
 2 33 phototransduction  
 GO:0009416 0.000417103363099922 26.1117216117216 0.153622586672203  
 3 185 response to light stimulus  
 GO:0009583 0.000484492897054804 75.7947368421053 0.0332156944156114  
 2 40 detection of light stimulus  
 GO:0009582 0.00143783917370817 42.9014925373134 0.0572970728669296  
 2 69 detection of abiotic stimulus  
 GO:0009314 0.00160013579753211 16.2061855670103 0.244135353954744  
 3 294 response to radiation  
 GO:0009581 0.00222261401593814 34.1785714285714 0.0714137429935645  
 2 86 detection of external stimulus  
 GO:0016056 0.0024892811208842 656.227272727273 0.00249117708117085  
 1 3 rhodopsin mediated signaling pathway  
 GO:0035845 0.0024892811208842 656.227272727273 0.00249117708117085  
 1 3 photoreceptor cell outer segment organization  
 GO:0060041 0.00264822548323841 31.1891304347826 0.0780568818766867

STable4\_20PerPair

|                                                                  |         |                                                                |                  |                   |          |                   |        |                     |           |
|------------------------------------------------------------------|---------|----------------------------------------------------------------|------------------|-------------------|----------|-------------------|--------|---------------------|-----------|
| 2                                                                | 94      | retina development in camera-type eye                          |                  |                   |          |                   |        |                     |           |
| GO:0000244                                                       |         | 0.00497288091920933                                            | 262.436363636364 |                   |          |                   |        | 0.00498235416234171 |           |
| 1                                                                | 6       | assembly of spliceosomal tri-snRNP                             |                  |                   |          |                   |        |                     |           |
| GO:0006657                                                       |         | 0.00497288091920933                                            | 262.436363636364 |                   |          |                   |        | 0.00498235416234171 |           |
| 1                                                                | 6       | CDP-choline pathway                                            |                  |                   |          |                   |        |                     |           |
| GO:0009586                                                       |         | 0.00497288091920933                                            | 262.436363636364 |                   |          |                   |        | 0.00498235416234171 |           |
| 1                                                                | 6       | rhodopsin mediated phototransduction                           |                  |                   |          |                   |        |                     |           |
| GO:0046548                                                       |         | 0.00497288091920933                                            | 262.436363636364 |                   |          |                   |        | 0.00498235416234171 |           |
| 1                                                                | 6       | retinal rod cell development                                   |                  |                   |          |                   |        |                     |           |
| GO:0000077                                                       |         | 0.00499651339916335                                            | 22.3609375       | 0.107951006850737 |          |                   |        |                     | 2         |
| 130                                                              | DNA     | damage checkpoint                                              |                  |                   |          |                   |        |                     |           |
| GO:0031570                                                       |         | 0.00545513075877989                                            | 21.3507462686567 |                   |          |                   |        | 0.112933361013079   |           |
| 2                                                                | 136     | DNA integrity checkpoint                                       |                  |                   |          |                   |        |                     |           |
| GO:0042670                                                       |         | 0.00662546365102634                                            | 187.428571428571 |                   |          |                   |        | 0.00664313888312228 |           |
| 1                                                                | 8       | retinal cone cell differentiation                              |                  |                   |          |                   |        |                     |           |
| GO:0046549                                                       |         | 0.00662546365102634                                            | 187.428571428571 |                   |          |                   |        | 0.00664313888312228 |           |
| 1                                                                | 8       | retinal cone cell development                                  |                  |                   |          |                   |        |                     |           |
| GO:0035082                                                       |         | 0.00745081118520774                                            | 163.988636363636 |                   |          |                   |        | 0.00747353124351256 |           |
| 1                                                                | 9       | axoneme assembly                                               |                  |                   |          |                   |        |                     |           |
| GO:0071398                                                       |         | 0.00745081118520774                                            | 163.988636363636 |                   |          |                   |        | 0.00747353124351256 |           |
| 1                                                                | 9       | cellular response to fatty acid                                |                  |                   |          |                   |        |                     |           |
| GO:0000085                                                       |         | 0.00909962076805748                                            | 131.172727272727 |                   |          |                   |        | 0.00913431596429313 |           |
| 1                                                                | 11      | G2 phase of mitotic cell cycle                                 |                  |                   |          |                   |        |                     |           |
| GO:0050908                                                       |         | 0.00909962076805748                                            | 131.172727272727 |                   |          |                   |        | 0.00913431596429313 |           |
| 1                                                                | 11      | detection of light stimulus involved in visual perception      |                  |                   |          |                   |        |                     |           |
| GO:0050962                                                       |         | 0.00909962076805748                                            | 131.172727272727 |                   |          |                   |        | 0.00913431596429313 |           |
| 1                                                                | 11      | detection of light stimulus involved in sensory perception     |                  |                   |          |                   |        |                     |           |
| GO:0051319                                                       |         | 0.00909962076805748                                            | 131.172727272727 |                   |          |                   |        | 0.00913431596429313 |           |
| 1                                                                | 11      | G2 phase                                                       |                  |                   |          |                   |        |                     |           |
| GO:0060219                                                       |         | 0.00992308368708683                                            | 119.239669421488 |                   |          |                   |        | 0.00996470832468341 |           |
| 1                                                                | 12      | camera-type eye photoreceptor cell differentiation             |                  |                   |          |                   |        |                     |           |
| GO:0051606                                                       |         | 0.00999095106939415                                            | 15.4945652173913 |                   |          |                   |        | 0.154452979032593   |           |
| 2                                                                | 186     | detection of stimulus                                          |                  |                   |          |                   |        |                     |           |
| Tissue: whole_Blood=>Skin_Sun_Exposed_Lower_leg Type: cluster    |         |                                                                |                  |                   |          |                   |        |                     |           |
| SourceGene: ST6GALNAC5(ENSG00000117069.9)                        |         |                                                                |                  |                   |          |                   |        |                     |           |
| TargetGeneSet: RPL11 SYF2 NDUFS5 CCDC23 JAK1 NAP1L4P1 PARP1 RP11 |         |                                                                |                  |                   |          |                   |        |                     |           |
| RPS7                                                             | DPY30   | DYNC2LI1                                                       | UBC              | ASPRV1            | RPL31    | COQ10B            | EEF1B2 | RPL24               |           |
| IL20RB-AS1                                                       |         | NMNAT3                                                         | WDR53            | RPL35A            | CHRNA9   | LSM6              | FRG1   | RPL37               | ZCCHC9    |
| ATG12                                                            | TMEM14C | TMEM14B                                                        | CCDC28A          | TOMM7             | PRKRIP1  | DCTN6             | TMEM68 | RPS20               | TCEB1     |
| RPL30                                                            | RPS6    | TXN                                                            | RPS24            | RPS13             | C11orf54 |                   | CWC15  | ATP5L               | HSPA8     |
| PFDN5                                                            | SARNP   | CCDC59                                                         | C12orf47         |                   | ARL6IP4  | UFM1              | GTF2F2 | KLHDC2              | NAA30     |
| RSL24D1                                                          | RPS3AP6 | CHD2                                                           | FAM192A          | CDH1              | C17orf48 |                   | RPS7P1 | RPL17               | TLK2      |
| CANT1                                                            | PIN1    | ZNF350                                                         | LINC00493        |                   | LBP      | C20orf111         |        | DNTTIP1             | ZNFX1-AS1 |
| GYP2D6                                                           | MSN     | COX7B                                                          | RP3              |                   |          |                   |        |                     |           |
| GOBPID                                                           | Pvalue  | OddsRatio                                                      | ExpCount         | Count             | Size     | Term              |        |                     |           |
| GO:0006414                                                       |         | 1.19085887672311e-18                                           | 55.0230769230769 |                   |          | 0.392360390284409 |        |                     |           |
| 14                                                               | 105     | translational elongation                                       |                  |                   |          |                   |        |                     |           |
| GO:0019080                                                       |         | 5.80872877040334e-18                                           | 40.3308823529412 |                   |          | 0.564251608885198 |        |                     |           |
| 15                                                               | 151     | viral genome expression                                        |                  |                   |          |                   |        |                     |           |
| GO:0019083                                                       |         | 5.80872877040334e-18                                           | 40.3308823529412 |                   |          | 0.564251608885198 |        |                     |           |
| 15                                                               | 151     | viral transcription                                            |                  |                   |          |                   |        |                     |           |
| GO:0006415                                                       |         | 9.02877404166579e-18                                           | 58.2073170731707 |                   |          | 0.340045671579821 |        |                     |           |
| 13                                                               | 91      | translational termination                                      |                  |                   |          |                   |        |                     |           |
| GO:0006614                                                       |         | 6.3351830881119e-17                                            | 49.3014316012725 |                   |          | 0.392360390284409 |        |                     |           |
| 13                                                               | 105     | SRP-dependent cotranslational protein targeting to membrane    |                  |                   |          |                   |        |                     |           |
| GO:0006613                                                       |         | 7.20161658939872e-17                                           | 48.7678992918961 |                   |          | 0.396097155906166 |        |                     |           |
| 13                                                               | 106     | cotranslational protein targeting to membrane                  |                  |                   |          |                   |        |                     |           |
| GO:0045047                                                       |         | 7.20161658939872e-17                                           | 48.7678992918961 |                   |          | 0.396097155906166 |        |                     |           |
| 13                                                               | 106     | protein targeting to ER                                        |                  |                   |          |                   |        |                     |           |
| GO:0072599                                                       |         | 7.20161658939872e-17                                           | 48.7678992918961 |                   |          | 0.396097155906166 |        |                     |           |
| 13                                                               | 106     | establishment of protein localization to endoplasmic reticulum |                  |                   |          |                   |        |                     |           |
| GO:0070972                                                       |         | 3.04956531756217e-16                                           | 43.1581881533101 |                   |          | 0.440938343367241 |        |                     |           |
| 13                                                               | 118     | protein localization to endoplasmic reticulum                  |                  |                   |          |                   |        |                     |           |

Stable4\_20PerPair

|                          |                                                                     |                                                             |                    |      |
|--------------------------|---------------------------------------------------------------------|-------------------------------------------------------------|--------------------|------|
| GO:0000184               | 3.41449266051005e-16                                                | 42.748044178555                                             | 0.444675108988997  | 13   |
| 119                      | nuclear-transcribed mRNA catabolic process, nonsense-mediated decay |                                                             |                    |      |
| GO:0000956               | 1.12327767765401e-15                                                | 32.1593548387097                                            | 0.631513390076811  |      |
| 14                       | 169                                                                 | nuclear-transcribed mRNA catabolic process                  |                    |      |
| GO:0006402               | 2.33465348657263e-15                                                | 30.3753048780488                                            | 0.665144280672618  |      |
| 14                       | 178                                                                 | mRNA catabolic process                                      |                    |      |
| GO:0019058               | 3.59021666478864e-15                                                | 25.2510683760684                                            | 0.863192858625701  |      |
| 15                       | 231                                                                 | viral infectious cycle                                      |                    |      |
| GO:0006413               | 8.77121072253619e-15                                                | 32.523951570451                                             | 0.567988374506954  | 13   |
| 152                      | translational initiation                                            |                                                             |                    |      |
| GO:0006612               | 9.56022466007897e-15                                                | 32.2893728222997                                            | 0.571725140128711  |      |
| 13                       | 153                                                                 | protein targeting to membrane                               |                    |      |
| GO:0043624               | 9.56022466007897e-15                                                | 32.2893728222997                                            | 0.571725140128711  |      |
| 13                       | 153                                                                 | cellular protein complex disassembly                        |                    |      |
| GO:0043241               | 1.45764839761359e-14                                                | 31.1650126156434                                            | 0.590408968237492  |      |
| 13                       | 158                                                                 | protein complex disassembly                                 |                    |      |
| GO:0072594               | 1.57530292388641e-14                                                | 26.1707894736842                                            | 0.762300186838281  |      |
| 14                       | 204                                                                 | establishment of protein localization to organelle          |                    |      |
| GO:0006401               | 1.68635353020743e-14                                                | 26.0319371727749                                            | 0.766036952460037  |      |
| 14                       | 205                                                                 | RNA catabolic process                                       |                    |      |
| GO:0022415               | 2.07072879557206e-14                                                | 22.2166405023548                                            | 0.971559061656633  |      |
| 15                       | 260                                                                 | viral reproductive process                                  |                    |      |
| GO:0034623               | 5.134844663752e-14                                                  | 28.0363581275564                                            | 0.650197218185593  |      |
| 13                       | 174                                                                 | cellular macromolecular complex disassembly                 |                    |      |
| GO:0032984               | 7.42001189748255e-14                                                | 27.1823391125478                                            | 0.668881046294374  |      |
| 13                       | 179                                                                 | macromolecular complex disassembly                          |                    |      |
| GO:0071845               | 1.495084767429e-12                                                  | 18.3127777777778                                            | 1.06124143657878   |      |
| 14                       | 284                                                                 | cellular component disassembly at cellular level            |                    |      |
| GO:0022411               | 1.80774127218546e-12                                                | 18.0403284671533                                            | 1.07618849906581   |      |
| 14                       | 288                                                                 | cellular component disassembly                              |                    |      |
| GO:0033365               | 9.0574114315115e-12                                                 | 12.8434872739836                                            | 1.76749013909072   |      |
| 16                       | 473                                                                 | protein localization to organelle                           |                    |      |
| GO:0006605               | 9.34999257885447e-12                                                | 12.8145253964606                                            | 1.77122690471248   |      |
| 16                       | 474                                                                 | protein targeting                                           |                    |      |
| GO:0016032               | 5.83936139457719e-11                                                | 12.3156316160903                                            | 1.68528129541208   |      |
| 15                       | 451                                                                 | viral reproduction                                          |                    |      |
| GO:0042254               | 7.36950037898148e-08                                                | 17.5837187789084                                            | 0.556778077641686  |      |
| 8                        | 149                                                                 | ribosome biogenesis                                         |                    |      |
| GO:0006364               | 1.09399988477819e-07                                                | 21.9565694231191                                            | 0.388623624662653  |      |
| 7                        | 104                                                                 | rRNA processing                                             |                    |      |
| GO:0022613               | 1.32623930740311e-07                                                | 13.1305555555556                                            | 0.840772264895163  |      |
| 9                        | 225                                                                 | ribonucleoprotein complex biogenesis                        |                    |      |
| GO:0016072               | 1.61093682834633e-07                                                | 20.6688700681677                                            | 0.411044218393191  |      |
| 7                        | 110                                                                 | rRNA metabolic process                                      |                    |      |
| GO:0071843               | 2.21581441355786e-07                                                | 12.3191304347826                                            | 0.893086983599751  |      |
| 9                        | 239                                                                 | cellular component biogenesis at cellular level             |                    |      |
| GO:0034470               | 8.94038674369838e-06                                                | 10.9610847756587                                            | 0.747353124351256  |      |
| 7                        | 200                                                                 | ncRNA processing                                            |                    |      |
| GO:0008380               | 2.42786094698584e-05                                                | 7.77474120082816                                            | 1.20697529582728   |      |
| 8                        | 323                                                                 | RNA splicing                                                |                    |      |
| GO:0042274               | 3.86816589134669e-05                                                | 56.4                                                        | 0.067261781191613  | 3 18 |
| ribosomal small          | subunit biogenesis                                                  |                                                             |                    |      |
| GO:0034660               | 8.63683542749491e-05                                                | 7.56413592530231                                            | 1.06497820220054   |      |
| 7                        | 285                                                                 | ncRNA metabolic process                                     |                    |      |
| GO:0032480               | 0.000248580397639113                                                | 28.1705882352941                                            | 0.123313265517957  |      |
| 3                        | 33                                                                  | negative regulation of type I interferon production         |                    |      |
| GO:0042273               | 0.000883135281802382                                                | 55.3346153846154                                            | 0.0448411874610754 |      |
| 2                        | 12                                                                  | ribosomal large subunit biogenesis                          |                    |      |
| GO:0000377               | 0.000962816076885864                                                | 7.28027894574915                                            | 0.762300186838281  |      |
| 5                        | 204                                                                 | RNA splicing, via transesterification reactions with bulged |                    |      |
| adenosine as nucleophile |                                                                     |                                                             |                    |      |
| GO:0000398               | 0.000962816076885864                                                | 7.28027894574915                                            | 0.762300186838281  |      |
| 5                        | 204                                                                 | nuclear mRNA splicing, via spliceosome                      |                    |      |

Stable4\_20PerPair

|                                                 |                                                                                      |                  |                     |
|-------------------------------------------------|--------------------------------------------------------------------------------------|------------------|---------------------|
| GO:0000375                                      | 0.00107282609640575                                                                  | 7.09933973589436 | 0.780984014947062   |
| 5 209                                           | RNA splicing, via transesterification reactions                                      |                  |                     |
| GO:0022900                                      | 0.00156140804356244                                                                  | 8.77969230769231 | 0.500726593315342   |
| 4 134                                           | electron transport chain                                                             |                  |                     |
| GO:0032479                                      | 0.0017493014041062                                                                   | 13.824493731919  | 0.239152999792402   |
| 64                                              | regulation of type I interferon production                                           |                  | 3                   |
| GO:0032606                                      | 0.00217107408523695                                                                  | 12.7727272727273 | 0.257836827901183   |
| 3 69                                            | type I interferon production                                                         |                  |                     |
| GO:0006397                                      | 0.00359947588662386                                                                  | 4.45419847328244 | 1.49096948308076    |
| 6 399                                           | mRNA processing                                                                      |                  |                     |
| GO:0022904                                      | 0.00551560640076413                                                                  | 9.04743833017078 | 0.358729499688603   |
| 3 96                                            | respiratory electron transport chain                                                 |                  |                     |
| Tissue: Whole_Blood=>Skin_Sun_Exposed_Lower_leg | Type: asymmetric                                                                     |                  |                     |
| SourceGene:                                     | TMEM222 (ENSG00000186501.8)                                                          |                  |                     |
| TargetGeneSet:                                  | THRAP3 BCL9 KRCC1 TXNDC9 MTX2 HIGD1A HESX1 THOC7                                     |                  |                     |
| IL20RB-AS1                                      | IL8 SH3D19 LMNB1 CAMLG RP4 RP11 BRP44L HNRNPA2B1                                     |                  |                     |
| ZNF277 CTA                                      | GANAB TRPT1 SRPR ESYT1 GAPDHP44 ARL6IP4 RBM23                                        |                  |                     |
| TRAPPC6B                                        | NAA30 ZNF689 PDXDC2P RP13 CORO6 STAT3 LMNB2 KHSRP                                    |                  |                     |
| LIN7B ITCH                                      | C20orf111 RRP1B SF3A1 FUNDC1 SMC1A HUWE1 MSN                                         |                  |                     |
| SNX12 PRPS1                                     |                                                                                      |                  |                     |
| GOBPID                                          | Pvalue                                                                               | ExpCount         | Count               |
| GO:0008380                                      | 1.85087824769429e-07                                                                 | 13.0340045202383 | 0.894055774686873   |
| 9 323                                           | RNA splicing                                                                         |                  |                     |
| GO:0006397                                      | 1.11580166434056e-05                                                                 | 8.96419437340153 | 1.10442183931908    |
| 8 399                                           | mRNA processing                                                                      |                  |                     |
| GO:0000375                                      | 2.16916071209828e-05                                                                 | 12.3512025499855 | 0.578506677738565   |
| 6 209                                           | RNA splicing, via transesterification reactions                                      |                  |                     |
| GO:0000377                                      | 0.000235012626919213                                                                 | 10.2024407753051 | 0.564666805065393   |
| 5 204                                           | RNA splicing, via transesterification reactions with bulged adenosine as nucleophile |                  |                     |
| GO:0000398                                      | 0.000235012626919213                                                                 | 10.2024407753051 | 0.564666805065393   |
| 5 204                                           | nuclear mRNA splicing, via spliceosome                                               |                  |                     |
| GO:0050657                                      | 0.0053958171239346                                                                   | 9.19240669240669 | 0.357068714967822   |
| 3 129                                           | nucleic acid transport                                                               |                  |                     |
| GO:0050658                                      | 0.0053958171239346                                                                   | 9.19240669240669 | 0.357068714967822   |
| 3 129                                           | RNA transport                                                                        |                  |                     |
| GO:0051236                                      | 0.0053958171239346                                                                   | 9.19240669240669 | 0.357068714967822   |
| 3 129                                           | establishment of RNA localization                                                    |                  |                     |
| GO:0006403                                      | 0.00624663134188405                                                                  | 8.70432838853892 | 0.376444536710262   |
| 3 136                                           | RNA localization                                                                     |                  |                     |
| GO:0015931                                      | 0.00817800154115776                                                                  | 7.86762272476558 | 0.415196180195142   |
| 3 150                                           | nucleobase-containing compound transport                                             |                  |                     |
| GO:0016056                                      | 0.00828153127754283                                                                  | 184.730769230769 | 0.00830392360390284 |
| 1 3                                             | rhodopsin mediated signaling pathway                                                 |                  |                     |
| GO:0090085                                      | 0.00828153127754283                                                                  | 184.730769230769 | 0.00830392360390284 |
| 1 3                                             | regulation of protein deubiquitination                                               |                  |                     |
| GO:0019048                                      | 0.009077269810852                                                                    | 15.1168421052632 | 0.143934675800983   |
| 2 52                                            | virus-host interaction                                                               |                  |                     |
