# Supplementary material for: Inter-tissue coexpression network analysis reveals DPP4 as an important gene in heart to blood communication
Source: PubMed Central journal article supplement (PMC4746932; doi:10.1186/s13073-016-0268-1), 2016-02-09
Supplement: 13073_2016_268_MOESM6_ESM.pdf [file 13073_2016_268_MOESM6_ESM.pdf]

Supplemental Table 5

| index | GO Level 3 category | G O annotation                                                                            |
|-------|---------------------|-------------------------------------------------------------------------------------------|
| 1     | GO:0030029          | actin filament-based process                                                              |
| 2     | GO:0002504          | antigen processing and presentation of peptide or polysaccharide antigen via MHC class II |
| 3     | GO:0031295          | T cell costimulation                                                                      |
| 4     | GO:0035966          | response to topologically incorrect protein                                               |
| 5     | GO:0060041          | retina development in camera-type eye                                                     |
| 6     | GO:0006323          | DNA packaging                                                                             |
| 7     | GO:0009582          | detection of abiotic stimulus                                                             |
| 8     | GO:0009581          | detection of external stimulus                                                            |
| 9     | GO:0006903          | vesicle targeting                                                                         |
| 10    | GO:0051650          | establishment of vesicle localization                                                     |
| 11    | GO:0001505          | regulation of neurotransmitter levels                                                     |
| 12    | GO:0003001          | generation of a signal involved in cell-cell signaling                                    |
| 13    | GO:0061061          | muscle structure development                                                              |
| 14    | GO:0007507          | heart development                                                                         |
| 15    | GO:0050879          | multicellular organismal movement                                                         |
| 16    | GO:0045061          | thymic T cell selection                                                                   |
| 17    | GO:0006403          | RNA localization                                                                          |
| 18    | GO:0043414          | macromolecule methylation                                                                 |
| 19    | GO:0048514          | blood vessel morphogenesis                                                                |
| 20    | GO:0001568          | blood vessel development                                                                  |
| 21    | GO:0001525          | angiogenesis                                                                              |
| 22    | GO:0050808          | synapse organization                                                                      |
| 23    | GO:0010324          | membrane invagination                                                                     |
| 24    | GO:0051607          | defense response to virus                                                                 |
| 25    | GO:0035383          | thioester metabolic process                                                               |
| 26    | GO:0031589          | cell-substrate adhesion                                                                   |
| 27    | GO:0001101          | response to acid                                                                          |
| 28    | GO:0003206          | cardiac chamber morphogenesis                                                             |
| 29    | GO:0003205          | cardiac chamber development                                                               |

|    |            |                                                       |
|----|------------|-------------------------------------------------------|
| 30 | GO:0007423 | sensory organ development                             |
| 31 | GO:0071216 | cellular response to biotic stimulus                  |
| 32 | GO:0006099 | tricarboxylic acid cycle                              |
| 33 | GO:0030595 | leukocyte chemotaxis                                  |
| 34 | GO:0051303 | establishment of chromosome localization              |
| 35 | GO:0045123 | cellular extravasation                                |
| 36 | GO:0007585 | respiratory gaseous exchange                          |
| 37 | GO:0009595 | detection of biotic stimulus                          |
| 38 | GO:0002238 | response to molecule of fungal origin                 |
| 39 | GO:0021700 | developmental maturation                              |
| 40 | GO:0033002 | muscle cell proliferation                             |
| 41 | GO:0009612 | response to mechanical stimulus                       |
| 42 | GO:0003407 | neural retina development                             |
| 43 | GO:0001754 | eye photoreceptor cell differentiation                |
| 44 | GO:0044236 | multicellular organismal metabolic process            |
| 45 | GO:0040012 | regulation of locomotion                              |
| 46 | GO:0042391 | regulation of membrane potential                      |
| 47 | GO:0043299 | leukocyte degranulation                               |
| 48 | GO:0045730 | respiratory burst                                     |
| 49 | GO:0043383 | negative T cell selection                             |
| 50 | GO:0043900 | regulation of multi-organism process                  |
| 51 | GO:0044364 | disruption of cells of other organism                 |
| 52 | GO:0043954 | cellular component maintenance                        |
| 53 | GO:0050803 | regulation of synapse structure and activity          |
| 54 | GO:0048546 | digestive tract morphogenesis                         |
| 55 | GO:0006790 | sulfur compound metabolic process                     |
| 56 | GO:0001503 | ossification                                          |
| 57 | GO:0001709 | cell fate determination                               |
| 58 | GO:0060021 | palate development                                    |
| 59 | GO:0048729 | tissue morphogenesis                                  |
| 60 | GO:0010927 | cellular component assembly involved in morphogenesis |
| 61 | GO:0034330 | cell junction organization                            |
| 62 | GO:0071705 | nitrogen compound transport                           |
| 63 | GO:0010243 | response to organonitrogen compound                   |

|    |            |                                                |
|----|------------|------------------------------------------------|
| 64 | GO:0060323 | head morphogenesis                             |
| 65 | GO:0060325 | face morphogenesis                             |
| 66 | GO:0016337 | cell-cell adhesion                             |
| 67 | GO:0042267 | natural killer cell mediated cytotoxicity      |
| 68 | GO:0048598 | embryonic morphogenesis                        |
| 69 | GO:0060560 | developmental growth involved in morphogenesis |
| 70 | GO:0097194 | execution phase of apoptosis                   |
| 71 | GO:0010817 | regulation of hormone levels                   |
| 72 | GO:0006725 | cellular aromatic compound metabolic process   |
| 73 | GO:0055094 | response to lipoprotein particle stimulus      |
| 74 | GO:0007420 | brain development                              |
| 75 | GO:0007618 | mating                                         |
| 76 | GO:0021915 | neural tube development                        |
| 77 | GO:0006081 | cellular aldehyde metabolic process            |
| 78 | GO:0048588 | developmental cell growth                      |
| 79 | GO:0061024 | membrane organization                          |
| 80 | GO:0002237 | response to molecule of bacterial origin       |
| 81 | GO:0010035 | response to inorganic substance                |
| 82 | GO:0031341 | regulation of cell killing                     |
| 83 | GO:0002218 | activation of innate immune response           |
| 84 | GO:0046148 | pigment biosynthetic process                   |
| 85 | GO:0010171 | body morphogenesis                             |
| 86 | GO:0048736 | appendage development                          |
| 87 | GO:0050673 | epithelial cell proliferation                  |
| 88 | GO:0035295 | tube development                               |
| 89 | GO:0060322 | head development                               |
| 90 | GO:0060324 | face development                               |
| 91 | GO:0001822 | kidney development                             |
| 92 | GO:0035107 | appendage morphogenesis                        |
| 93 | GO:0021510 | spinal cord development                        |
| 94 | GO:0048771 | tissue remodeling                              |
| 95 | GO:0060349 | bone morphogenesis                             |
| 96 | GO:0042440 | pigment metabolic process                      |
| 97 | GO:0030324 | lung development                               |

|     |            |                                                   |
|-----|------------|---------------------------------------------------|
| 98  | GO:0034101 | erythrocyte homeostasis                           |
| 99  | GO:0072593 | reactive oxygen species metabolic process         |
| 100 | GO:0045103 | intermediate filament-based process               |
| 101 | GO:0006970 | response to osmotic stress                        |
| 102 | GO:0001553 | luteinization                                     |
| 103 | GO:0090150 | establishment of protein localization to membrane |
| 104 | GO:0001666 | response to hypoxia                               |
| 105 | GO:0007163 | establishment or maintenance of cell polarity     |
| 106 | GO:0003002 | regionalization                                   |
| 107 | GO:0007272 | ensheathment of neurons                           |
| 108 | GO:0061351 | neural precursor cell proliferation               |
| 109 | GO:0070482 | response to oxygen levels                         |
| 110 | GO:0061053 | somite development                                |
| 111 | GO:0048286 | lung alveolus development                         |
| 112 | GO:0051098 | regulation of binding                             |
| 113 | GO:0048568 | embryonic organ development                       |
| 114 | GO:0009991 | response to extracellular stimulus                |
| 115 | GO:0001889 | liver development                                 |
| 116 | GO:0009636 | response to toxic substance                       |
| 117 | GO:0022406 | membrane docking                                  |
| 118 | GO:0060135 | maternal process involved in female pregnancy     |
| 119 | GO:0071496 | cellular response to external stimulus            |
| 120 | GO:0008217 | regulation of blood pressure                      |
| 121 | GO:0060004 | reflex                                            |
| 122 | GO:0002377 | immunoglobulin production                         |
| 123 | GO:0061439 | kidney vasculature morphogenesis                  |
| 124 | GO:0061438 | renal system vasculature morphogenesis            |
| 125 | GO:0001763 | morphogenesis of a branching structure            |
| 126 | GO:0031099 | regeneration                                      |
| 127 | GO:0032196 | transposition                                     |
| 128 | GO:0040008 | regulation of growth                              |
| 129 | GO:0001964 | startle response                                  |
| 130 | GO:0042303 | molting cycle                                     |
| 131 | GO:0002088 | lens development in camera-type eye               |

|     |            |                                                          |
|-----|------------|----------------------------------------------------------|
| 132 | GO:0021542 | dentate gyrus development                                |
| 133 | GO:0060042 | retina morphogenesis in camera-type eye                  |
| 134 | GO:0032835 | glomerulus development                                   |
| 135 | GO:0043449 | cellular alkene metabolic process                        |
| 136 | GO:1900673 | olefin metabolic process                                 |
| 137 | GO:0097006 | regulation of plasma lipoprotein particle levels         |
| 138 | GO:0022612 | gland morphogenesis                                      |
| 139 | GO:0034381 | plasma lipoprotein particle clearance                    |
| 140 | GO:0071827 | plasma lipoprotein particle organization                 |
| 141 | GO:0045494 | photoreceptor cell maintenance                           |
| 142 | GO:0010876 | lipid localization                                       |
| 143 | GO:0051235 | maintenance of location                                  |
| 144 | GO:0051186 | cofactor metabolic process                               |
| 145 | GO:0006730 | one-carbon metabolic process                             |
| 146 | GO:0051651 | maintenance of location in cell                          |
| 147 | GO:0071214 | cellular response to abiotic stimulus                    |
| 148 | GO:0009314 | response to radiation                                    |
| 149 | GO:0042493 | response to drug                                         |
| 150 | GO:0001816 | cytokine production                                      |
| 151 | GO:0002757 | immune response-activating signal transduction           |
| 152 | GO:0070661 | leukocyte proliferation                                  |
| 153 | GO:0048534 | hematopoietic or lymphoid organ development              |
| 154 | GO:0043062 | extracellular structure organization                     |
| 155 | GO:0048002 | antigen processing and presentation of peptide antigen   |
| 156 | GO:0019884 | antigen processing and presentation of exogenous antigen |
| 157 | GO:0007017 | microtubule-based process                                |
| 158 | GO:0051301 | cell division                                            |
| 159 | GO:0007059 | chromosome segregation                                   |
| 160 | GO:0007586 | digestion                                                |
| 161 | GO:0006956 | complement activation                                    |
| 162 | GO:0006959 | humoral immune response                                  |
| 163 | GO:0002443 | leukocyte mediated immunity                              |
| 164 | GO:0002250 | adaptive immune response                                 |
| 165 | GO:0006091 | generation of precursor metabolites and energy           |

|     |            |                                                    |
|-----|------------|----------------------------------------------------|
| 166 | GO:0022613 | ribonucleoprotein complex biogenesis               |
| 167 | GO:0022411 | cellular component disassembly                     |
| 168 | GO:0072594 | establishment of protein localization to organelle |
| 169 | GO:0006413 | translational initiation                           |
